# Supplementary material for: DNA hypermethylation of the ZNF132 gene participates in the clinicopathological aggressiveness of ‘pan-negative’-type lung adenocarcinomas
Source: PubMed Central journal article supplement — Carcinogenesis. 2020 Nov 6;42(2):169–79. doi: 10.1093/carcin/bgaa115 (PMC7905838; doi:10.1093/carcin/bgaa115), 2020-11-06
Supplement: bgaa115_suppl_supplementary_materials.pdf [file bgaa115_suppl_supplementary_materials.pdf]

Supplementary Table 1. Clinicopathological parameters of patients with lung adenocarcinomas.

| Category             | Clinicopathological parameters                           | Number of patients (n=162) |
|----------------------|----------------------------------------------------------|----------------------------|
| Patients             | Age                                                      |                            |
|                      | < 65 year                                                | 122                        |
|                      | ≥ 65 year                                                | 40                         |
|                      | Sex                                                      |                            |
|                      | Male                                                     | 85                         |
|                      | Female                                                   | 77                         |
|                      | Smoking history                                          |                            |
|                      | Never                                                    | 73                         |
|                      | Light somoker (≤ 20 pack-year)                           | 20                         |
|                      | Heavy smoker (> 20 pack-year)                            | 69                         |
|                      | Recurrence                                               |                            |
|                      | Negative                                                 | 39                         |
|                      | Positive                                                 | 123                        |
| Lung adenocarcinomas | Disease-specific death                                   |                            |
|                      | Negative                                                 | 81                         |
|                      | Positive                                                 | 81                         |
|                      | Tumor size                                               |                            |
|                      | ≤ 3 cm                                                   | 89                         |
|                      | > 3 cm, ≤ 5 cm                                           | 48                         |
|                      | > 5 cm, ≤ 7 cm                                           | 15                         |
|                      | > 7 cm                                                   | 10                         |
|                      | Histological subtype*                                    |                            |
|                      | Lepidic                                                  | 12                         |
|                      | Papillary                                                | 75                         |
|                      | Acinar                                                   | 26                         |
|                      | Micropapillary                                           | 15                         |
|                      | Solid                                                    | 27                         |
|                      | Invasive mucinous                                        | 3                          |
|                      | Not available                                            | 4                          |
|                      | Pleural invasion                                         |                            |
|                      | Negative                                                 | 80                         |
|                      | Invasion to the visceral pleura beyond the elastic fiber | 38                         |
|                      | Invasion to the surface of the visceral pleura           | 25                         |
|                      | Invasion to the parietal pleura                          | 19                         |
|                      | Lymphatic invasion                                       |                            |
|                      | Negative                                                 | 49                         |
|                      | Positive                                                 | 113                        |
|                      | Vascular invasion                                        |                            |
|                      | Negative                                                 | 45                         |
|                      | Positive                                                 | 117                        |
|                      | Intrapulmonary metastasis                                |                            |
|                      | Negative                                                 | 147                        |
|                      | Metastasis in the same lobe                              | 14                         |
|                      | Metastasis in the different lobe at same side            | 1                          |

\*Based on the World Health Organization classification (Ref. 21).

Supplementary Table 2. Primer sequences and optimized PCR conditions for quantitative DNA methylation analysis using pyrosequencing.

| Gene symbol   | Probe ID <sup>a</sup> | PCR primers                       |                                   | Sequencing primer       | Target sequence <sup>c</sup>                                                                                 | PCR condition                                                                                                                                                                                                                                                                                                                                |
|---------------|-----------------------|-----------------------------------|-----------------------------------|-------------------------|--------------------------------------------------------------------------------------------------------------|----------------------------------------------------------------------------------------------------------------------------------------------------------------------------------------------------------------------------------------------------------------------------------------------------------------------------------------------|
|               |                       | Forward                           | Reverse <sup>b</sup>              |                         |                                                                                                              |                                                                                                                                                                                                                                                                                                                                              |
| <i>ZNF132</i> | cg13877915            | 5'-GGGAATATTTTGTTTATAAAAGTAGAG-3' | 5'-CCCCAAATCCTTCTAAATAATATA-3'    | 5'-TTAAGGTGATTGAGGAA-3' | 5'-TGG <u>CG</u> (Position 1) TTTATTG <u>CG</u> (Position 2) T <u>CG</u> (Position 3) CTGCTCA-3'             | The final Mg <sup>2+</sup> concentration of each sample is 1.75mM.<br>The following three steps are repeated 50 cycles: denaturation for 30 sec at 94°C, annealing for 30 sec at 50°C and extension for 1 min at 72°C.                                                                                                                       |
| <i>TRIM58</i> | cg20855565            | 5'-TGAAGGGGAGGGGAATTATA-3'        | 5'-CCAATAATATCCCCTAACTTCAATTCA-3' | 5'-AAGGGGAGGGGAAT-3'    | 5'-CACAA <u>CG</u> (Position 1) TTAATTTTATCC <u>CG</u> (Position 2) ACATAGGGAG <u>CG</u> (Position 3) CCT-3' | The final Mg <sup>2+</sup> concentration of each sample is 2.0mM.<br>The following three steps are repeated 50 cycles: denaturation for 30 sec at 94°C, annealing for 30 sec, and extension for 1 min at 72°C.<br>Annealing temperatures are the following: drop 0.1°C for every cycle from 54°C while 20 cycles, and then 30cycles at 52°C. |

<sup>a</sup>Probe IDs for the Infinium HumanMethylation27 BeadChip (Illumina). <sup>b</sup>Reverse primers were biotinylated at the 5'-end. <sup>c</sup>All CpG sites in target sequences are underlined and numbered sequentially from the upstream direction.

Supplementary Table 3A. The 9,048 probes showing significant differences of DNA methylation levels in adjacent normal lung tissue samples between recurrence-positive and recurrence-negative patients.

| Probe ID <sup>a</sup> | Chromosome | Position <sup>b</sup> | Annotation <sup>c</sup>   | Gene symbol         | M-values (mean±SD)           |                              | FDR, q   |
|-----------------------|------------|-----------------------|---------------------------|---------------------|------------------------------|------------------------------|----------|
|                       |            |                       |                           |                     | Recurrence-negative patients | Recurrence-positive patients |          |
| cg14324200            | 1          | 861317                | GeneBody/5'UTR            | <i>SAMD11</i>       | -3.211±0.299                 | -3.411±0.389                 | 4.18E-03 |
| cg04485075            | 1          | 894587                | GeneBody/1st intron       | <i>NOC2L</i>        | -5.153±0.424                 | -5.428±0.489                 | 4.01E-03 |
| cg20022511            | 1          | 948740                | TSS200                    | <i>ISG15</i>        | -4.392±0.468                 | -4.778±0.331                 | 1.47E-04 |
| cg08067365            | 1          | 948893                | GeneBody/5'UTR/1st exon   | <i>ISG15</i>        | -4.942±0.597                 | -5.458±0.598                 | 1.38E-04 |
| cg03322129            | 1          | 1209673               | TSS1500                   | <i>UBE2J2</i>       | -4.372±0.395                 | -4.694±0.474                 | 4.70E-04 |
| cg00262415            | 1          | 1242732               | GeneBody/1st intron       | <i>ACAP3</i>        | -5.079±0.587                 | -5.492±0.561                 | 1.32E-03 |
| cg06038049            | 1          | 1259909               | GeneBody/1st intron       | <i>CPSF3L</i>       | -5.784±0.472                 | -6.266±0.542                 | 1.97E-05 |
| cg25397779            | 1          | 1343130               | TSS1500                   | <i>MRPL20</i>       | -4.662±0.261                 | -4.827±0.336                 | 6.51E-03 |
| cg09932694            | 1          | 1446840               | TSS1500                   | <i>ATAD3A</i>       | -3.107±0.432                 | -3.403±0.559                 | 3.34E-03 |
| cg05009249            | 1          | 1448132               | GeneBody/5'UTR/1st intron | <i>ATAD3A</i>       | -4.711±0.355                 | -4.967±0.45                  | 1.96E-03 |
| cg05181565            | 1          | 1509872               | GeneBody/1st exon         | <i>SSU72</i>        | -5.582±0.577                 | -6.143±0.531                 | 2.46E-05 |
| cg20755353            | 1          | 1510883               | TSS1500                   | <i>SSU72</i>        | -3.815±0.376                 | -4.077±0.438                 | 2.12E-03 |
| cg01738944            | 1          | 1677273               | GeneBody/5'UTR/1st exon   | <i>SLC35E2</i>      | -4.907±0.42                  | -5.309±0.498                 | 5.60E-05 |
| cg17990871            | 1          | 1677678               | TSS1500                   | <i>SLC35E2</i>      | -4.176±0.584                 | -4.689±0.638                 | 1.40E-04 |
| cg03716942            | 1          | 1821981               | GeneBody/5'UTR/1st intron | <i>GNB1</i>         | -4.325±0.421                 | -4.677±0.578                 | 5.26E-04 |
| cg12150066            | 1          | 1823305               | TSS1500                   | <i>GNB1</i>         | -4.058±0.436                 | -4.366±0.489                 | 1.71E-03 |
| cg24035370            | 1          | 1982434               | GeneBody/1st intron       | <i>PRKCZ</i>        | -3.667±0.411                 | -3.956±0.566                 | 3.16E-03 |
| cg24649713            | 1          | 2125979               | GeneBody/1st intron       | <i>C1orf86</i>      | -4.412±0.508                 | -4.878±0.691                 | 1.64E-04 |
| cg05940463            | 1          | 2126641               | TSS1500                   | <i>C1orf86</i>      | -4.428±0.318                 | -4.704±0.288                 | 1.11E-04 |
| cg23207616            | 1          | 2322827               | GeneBody/1st intron       | <i>MORN1</i>        | -5.484±0.432                 | -6.003±0.574                 | 2.69E-06 |
| cg23739036            | 1          | 2343736               | GeneBody/1st intron       | <i>PEX10</i>        | -6.206±0.522                 | -6.703±0.527                 | 3.92E-05 |
| cg11452360            | 1          | 2518608               | GeneBody                  | <i>FAM213B</i>      | -3.855±0.273                 | -4.165±0.41                  | 1.19E-05 |
| cg07453618            | 1          | 3541082               | TSS1500                   | <i>TPRG1L</i>       | -6.031±0.673                 | -6.525±0.588                 | 7.36E-04 |
| cg10074513            | 1          | 3541656               | GeneBody/1st exon         | <i>TPRG1L</i>       | -4.86±0.487                  | -5.335±0.625                 | 5.74E-05 |
| cg25885108            | 1          | 3568669               | TSS1500                   | <i>TP73</i>         | -4.58±0.305                  | -4.805±0.544                 | 5.10E-03 |
| cg19783114            | 1          | 3569046               | TSS200                    | <i>TP73</i>         | -6.296±0.66                  | -6.828±0.708                 | 3.86E-04 |
| cg03568718            | 1          | 3579873               | GeneBody/5'UTR/1st intron | <i>TP73</i>         | 3.291±0.258                  | 3.565±0.41                   | 4.71E-05 |
| cg14550570            | 1          | 3712988               | GeneBody/1st exon         | <i>LRRC47</i>       | -6.223±0.533                 | -6.714±0.512                 | 5.66E-05 |
| cg25762395            | 1          | 3816842               | GeneBody/5'UTR/1st exon   | <i>C1orf174</i>     | -4.822±1.235                 | -5.989±0.998                 | 3.00E-05 |
| cg09633588            | 1          | 3817016               | GeneBody/1st exon         | <i>LOC100133612</i> | -5.177±0.523                 | -5.49±0.45                   | 4.75E-03 |
| cg23323711            | 1          | 6259145               | GeneBody/1st intron       | <i>RPL22</i>        | -6.189±0.534                 | -6.647±0.495                 | 1.33E-04 |
| cg14303330            | 1          | 6259905               | TSS1500                   | <i>RPL22</i>        | -3.608±0.431                 | -3.959±0.555                 | 5.83E-04 |
| cg15341760            | 1          | 6297890               | GeneBody                  | <i>LINC00337</i>    | 2.329±0.174                  | 2.435±0.177                  | 3.93E-03 |
| cg14958889            | 1          | 6320471               | GeneBody/5'UTR/1st intron | <i>GPR153</i>       | -4.435±0.691                 | -4.803±0.377                 | 8.16E-03 |
| cg17236617            | 1          | 6454202               | TSS1500                   | <i>ACOT7</i>        | -4.206±0.364                 | -4.532±0.474                 | 1.84E-04 |
| cg25165880            | 1          | 6454326               | TSS1500                   | <i>ACOT7</i>        | -2.352±0.317                 | -2.544±0.295                 | 4.81E-03 |
| cg09549827            | 1          | 6484616               | TSS1500                   | <i>ESPN</i>         | -3.44±0.249                  | -3.618±0.383                 | 3.83E-03 |
| cg07274506            | 1          | 6614341               | GeneBody/1st exon         | <i>NOL9</i>         | -5.602±0.421                 | -6.037±0.532                 | 2.36E-05 |
| cg05086993            | 1          | 6614664               | TSS200                    | <i>NOL9</i>         | -3.585±0.552                 | -3.256±0.601                 | 7.09E-03 |
| cg06066711            | 1          | 6662645               | GeneBody/1st exon         | <i>KLHL21</i>       | -5.085±0.424                 | -5.402±0.422                 | 7.54E-04 |
| cg11688219            | 1          | 6684919               | TSS200                    | <i>THAP3</i>        | -3.817±0.346                 | -4.043±0.472                 | 5.74E-03 |
| cg03630344            | 1          | 7831156               | TSS200                    | <i>VAMP3</i>        | -5.027±0.496                 | -5.401±0.611                 | 1.16E-03 |
| cg06487986            | 1          | 7843564               | TSS1500                   | <i>PER3</i>         | -5.306±0.406                 | -5.616±0.452                 | 7.81E-04 |
| cg25514503            | 1          | 7845070               | GeneBody/1st intron       | <i>PER3</i>         | 2.69±0.296                   | 2.881±0.314                  | 3.66E-03 |
| cg17425224            | 1          | 8021250               | TSS1500                   | <i>PARK7</i>        | -3.133±0.489                 | -3.527±0.635                 | 6.77E-04 |
| cg25007680            | 1          | 8021821               | GeneBody/5'UTR/1st intron | <i>PARK7</i>        | -4.353±0.519                 | -4.709±0.501                 | 1.69E-03 |
| cg11832727            | 1          | 8877257               | GeneBody/5'UTR/1st exon   | <i>RERE</i>         | -4.459±0.301                 | -4.65±0.304                  | 3.81E-03 |
| cg08341978            | 1          | 8878227               | TSS1500                   | <i>RERE</i>         | -4.816±0.474                 | -5.124±0.435                 | 2.64E-03 |
| cg07483064            | 1          | 8938751               | TSS200                    | <i>ENO1-AS1</i>     | -5.06±0.364                  | -5.34±0.55                   | 1.84E-03 |
| cg12711814            | 1          | 8939529               | TSS1500                   | <i>ENO1</i>         | -4.256±0.295                 | -4.507±0.326                 | 2.21E-04 |
| cg10429262            | 1          | 9189507               | TSS1500                   | <i>GPR157</i>       | -3.536±0.634                 | -3.903±0.573                 | 6.72E-03 |
| cg13724813            | 1          | 9353314               | GeneBody/5'UTR/1st intron | <i>SPSB1</i>        | -4.525±0.425                 | -4.929±0.534                 | 7.76E-05 |
| cg23166362            | 1          | 9711965               | GeneBody/5'UTR/1st intron | <i>PIK3CD</i>       | -4.874±0.51                  | -5.379±0.555                 | 2.73E-05 |
| cg23508540            | 1          | 9884032               | GeneBody/5'UTR/1st exon   | <i>CLSTN1</i>       | -4.44±0.332                  | -4.673±0.44                  | 2.77E-03 |
| cg10740965            | 1          | 9969647               | GeneBody/5'UTR/1st intron | <i>CTNBP1</i>       | -4.913±0.288                 | -5.285±0.399                 | 8.90E-07 |
| cg27308387            | 1          | 9970993               | TSS1500                   | <i>CTNBP1</i>       | -4.077±0.387                 | -4.314±0.487                 | 7.70E-03 |
| cg04413397            | 1          | 10003059              | TSS1500                   | <i>LZIC</i>         | -4.868±0.373                 | -5.337±0.54                  | 1.83E-06 |
| cg08151470            | 1          | 10092299              | TSS1500                   | <i>UBE4B</i>        | -0.415±0.259                 | -0.104±0.381                 | 4.21E-06 |
| cg23036555            | 1          | 10458832              | TSS1500                   | <i>PGD</i>          | -5.842±0.671                 | -6.365±0.635                 | 4.38E-04 |
| cg14718680            | 1          | 10459268              | GeneBody/1st intron       | <i>PGD</i>          | -4.052±0.361                 | -4.456±0.605                 | 2.85E-05 |
| cg07894717            | 1          | 10508598              | TSS1500                   | <i>CORT</i>         | 3.429±0.229                  | 3.658±0.342                  | 7.88E-05 |
| cg11843760            | 1          | 10532677              | TSS200                    | <i>DFFA</i>         | -5.453±0.388                 | -5.767±0.395                 | 3.30E-04 |
| cg15031780            | 1          | 10535585              | GeneBody/1st intron       | <i>PEX14</i>        | -5.102±0.394                 | -5.365±0.5                   | 3.95E-03 |
| cg15482690            | 1          | 11072742              | GeneBody/5'UTR/1st exon   | <i>TARDBP</i>       | -5.574±0.679                 | -6.213±0.674                 | 4.56E-05 |
| cg06963844            | 1          | 11724238              | GeneBody/5'UTR/1st exon   | <i>FBXO6</i>        | -4.887±0.709                 | -5.454±0.612                 | 2.75E-04 |
| cg07789904            | 1          | 11741841              | TSS1500                   | <i>MAD2L2</i>       | -4.395±0.357                 | -4.816±0.454                 | 2.96E-06 |
| cg20164720            | 1          | 11796063              | TSS200                    | <i>AGTRAP</i>       | -5.121±0.579                 | -5.721±0.609                 | 1.20E-05 |
| cg01226883            | 1          | 11865642              | TSS1500                   | <i>CLCN6</i>        | -4.641±0.237                 | -4.93±0.442                  | 1.53E-05 |
| cg27012203            | 1          | 11865920              | TSS1500                   | <i>CLCN6</i>        | -5.078±0.469                 | -5.466±0.527                 | 3.20E-04 |
| cg23226134            | 1          | 11866389              | TSS1500                   | <i>MTHFR</i>        | -4.263±0.602                 | -4.708±0.529                 | 6.76E-04 |
| cg03427831            | 1          | 11867453              | TSS1500                   | <i>MTHFR</i>        | -1.43±0.294                  | -1.665±0.358                 | 5.78E-04 |
| cg04313552            | 1          | 11986714              | TSS1500                   | <i>KIAA2013</i>     | -2.449±0.3                   | -2.686±0.54                  | 2.95E-03 |
| cg11469137            | 1          | 11994385              | TSS1500                   | <i>PLOD1</i>        | -4.572±0.477                 | -4.879±0.481                 | 3.33E-03 |
| cg05523254            | 1          | 12040215              | TSS200                    | <i>MFN2</i>         | -5.126±0.399                 | -5.583±0.541                 | 6.13E-06 |
| cg09306577            | 1          | 12040877              | GeneBody/5'UTR/1st intron | <i>MFN2</i>         | -4.108±0.338                 | -4.53±0.429                  | 1.11E-06 |
| cg17897879            | 1          | 12123437              | GeneBody/5'UTR/1st exon   | <i>TNFRSF8</i>      | -3.951±0.363                 | -4.271±0.407                 | 1.45E-04 |
| cg13836770            | 1          | 12226913              | TSS200                    | <i>TNFRSF1B</i>     | -3.944±0.366                 | -4.207±0.553                 | 3.46E-03 |
| cg01346152            | 1          | 12678761              | TSS1500                   | <i>DHRS3</i>        | -3.153±0.38                  | -3.389±0.372                 | 4.25E-03 |
| cg25402049            | 1          | 14029875              | TSS1500                   | <i>PRDM2</i>        | 2.202±0.215                  | 2.358±0.256                  | 1.57E-03 |
| cg12379145            | 1          | 14030611              | TSS1500                   | <i>PRDM2</i>        | 3.305±0.259                  | 3.492±0.316                  | 1.75E-03 |
| cg21045388            | 1          | 15428172              | GeneBody                  | <i>KAZN</i>         | 3.269±0.243                  | 3.489±0.27                   | 1.02E-04 |
| cg24535573            | 1          | 15478961              | TSS200                    | <i>TMEM51-AS1</i>   | -4.183±0.408                 | -4.529±0.483                 | 2.81E-04 |
| cg22269795            | 1          | 15735965              | TSS1500                   | <i>EFHD2</i>        | -5.658±0.561                 | -6.037±0.517                 | 1.84E-03 |
| cg25021182            | 1          | 15802594              | TSS200                    | <i>CELA2B</i>       | 1.598±0.188                  | 1.74±0.223                   | 1.02E-03 |
| cg11706911            | 1          | 15910989              | GeneBody/1st intron       | <i>AGMAT</i>        | -2.204±0.478                 | -2.51±0.482                  | 3.41E-03 |
| cg15500658            | 1          | 16174610              | GeneBody/1st exon         | <i>FLJ37453</i>     | -5.094±0.317                 | -5.46±0.618                  | 5.04E-05 |
| cg24525573            | 1          | 16330784              | GeneBody/5'UTR/1st exon   | <i>C1orf64</i>      | 2.416±0.211                  | 2.569±0.225                  | 1.21E-03 |
| cg13770446            | 1          | 16349792              | GeneBody                  | <i>CLCNKA</i>       | 1.937±0.141                  | 2.15±0.253                   | 2.17E-07 |
| cg27298878            | 1          | 16563398              | GeneBody/5'UTR/1st exon   | <i>RSG1</i>         | -2.522±0.192                 | -2.676±0.233                 | 5.66E-04 |
| cg05588972            | 1          | 16563855              | TSS200                    | <i>RSG1</i>         | -4.166±0.337                 | -4.626±0.429                 | 2.04E-07 |
| cg16011258            | 1          | 16767021              | TSS200                    | <i>NECAP2</i>       | -4.724±0.465                 | -5.07±0.566                  | 1.28E-03 |

|            |   |          |                           |              |              |              |          |
|------------|---|----------|---------------------------|--------------|--------------|--------------|----------|
| cg07459264 | 1 | 16767326 | GeneBody/1st exon         | NECAP2       | -4.045±0.243 | -3.799±0.252 | 1.67E-05 |
| cg08477744 | 1 | 17308032 | GeneBody/5'UTR/1st exon   | MFAP2        | 2.785±0.268  | 2.966±0.311  | 2.90E-03 |
| cg12999103 | 1 | 17337842 | GeneBody/1st intron       | ATP13A2      | -3.828±0.328 | -4.039±0.432 | 5.99E-03 |
| cg03861428 | 1 | 17380702 | TSS200                    | SDHB         | -5.832±0.536 | -6.14±0.52   | 7.71E-03 |
| cg19282714 | 1 | 17445929 | GeneBody/5'UTR/1st exon   | PADI2        | -4.959±0.438 | -5.314±0.593 | 7.31E-04 |
| cg21243909 | 1 | 17766223 | GeneBody/5'UTR/1st exon   | RCC2         | -4.858±0.328 | -5.11±0.305  | 4.97E-04 |
| cg05380570 | 1 | 17866686 | GeneBody/5'UTR/1st intron | ARHGEF10L    | -3.75±0.407  | -4.129±0.607 | 2.01E-04 |
| cg19685066 | 1 | 18082003 | GeneBody/5'UTR/1st intron | ACTL8        | 2.166±0.267  | 2.337±0.32   | 4.96E-03 |
| cg18895413 | 1 | 19228616 | GeneBody/1st intron       | ALDH4A1      | -5.291±0.362 | -5.501±0.377 | 8.03E-03 |
| cg21728447 | 1 | 19229118 | GeneBody/5'UTR/1st exon   | ALDH4A1      | -4.45±0.433  | -4.781±0.497 | 8.31E-04 |
| cg00223950 | 1 | 19536222 | GeneBody/1st intron       | UBR4         | -4.138±0.239 | -4.388±0.269 | 1.27E-05 |
| cg18931421 | 1 | 19577814 | GeneBody/1st intron       | EMC1         | -4.3±0.425   | -4.57±0.406  | 3.30E-03 |
| cg06305312 | 1 | 19638330 | GeneBody/1st exon         | AKR7A2       | -4.346±0.321 | -4.54±0.314  | 5.34E-03 |
| cg15311933 | 1 | 19638897 | GeneBody/5'UTR/1st intron | PQLC2        | -5.248±0.394 | -5.675±0.504 | 1.16E-05 |
| cg22614355 | 1 | 19991237 | TSS1500                   | HTR6         | -5.129±0.483 | -5.424±0.474 | 4.87E-03 |
| cg21615127 | 1 | 20126875 | TSS1500                   | TMCO4        | -3.782±0.403 | -4.021±0.49  | 9.09E-03 |
| cg24613957 | 1 | 20250684 | TSS1500                   | PLA2G2E      | 2.354±0.233  | 2.524±0.335  | 2.56E-03 |
| cg00433406 | 1 | 20616975 | TSS1500                   | VWA5B1       | 1.241±0.22   | 1.444±0.345  | 2.95E-04 |
| cg23993660 | 1 | 20959826 | TSS200                    | PINK1        | -4.253±0.314 | -4.569±0.377 | 2.85E-05 |
| cg03218019 | 1 | 20987858 | GeneBody/1st exon         | DDOST        | -3.718±0.759 | -4.181±0.942 | 7.74E-03 |
| cg06819200 | 1 | 21616641 | GeneBody/1st exon         | ECE1         | -5.998±0.484 | -6.773±0.734 | 1.98E-08 |
| cg26885858 | 1 | 21766368 | TSS1500                   | NBPF3        | -4.387±0.381 | -4.688±0.524 | 1.00E-03 |
| cg22190291 | 1 | 21766732 | GeneBody/5'UTR/1st exon   | NBPF3        | -5.454±0.526 | -6.002±0.713 | 2.79E-05 |
| cg23352747 | 1 | 21835436 | TSS1500                   | ALPL         | -3.674±0.298 | -3.932±0.396 | 3.06E-04 |
| cg20956373 | 1 | 22109557 | GeneBody/5'UTR/1st exon   | USP48        | -5.05±0.425  | -5.409±0.515 | 3.07E-04 |
| cg16268051 | 1 | 22379390 | GeneBody/5'UTR/1st intron | CDC42        | -4.901±0.382 | -5.235±0.527 | 3.34E-04 |
| cg26870337 | 1 | 22777672 | TSS1500                   | ZBTB40       | 2.849±0.22   | 2.994±0.223  | 2.70E-03 |
| cg15041659 | 1 | 22778527 | GeneBody/5'UTR/1st intron | ZBTB40       | -4.807±0.353 | -5.052±0.577 | 6.18E-03 |
| cg25995460 | 1 | 22964156 | GeneBody                  | C1QA         | 2.525±0.239  | 2.387±0.251  | 8.31E-03 |
| cg00650762 | 1 | 23037368 | GeneBody/5'UTR/1st exon   | EPHB2        | -5.732±0.717 | -6.245±0.85  | 1.75E-03 |
| cg06958034 | 1 | 23346203 | GeneBody/1st exon         | KDM1A        | -5.201±0.496 | -5.578±0.44  | 5.26E-04 |
| cg06449653 | 1 | 23670777 | GeneBody/5'UTR/1st exon   | HNRNPR       | -5.838±0.61  | -6.264±0.631 | 1.61E-03 |
| cg00269115 | 1 | 23695530 | GeneBody/1st exon         | C1orf213     | -5.131±0.382 | -5.381±0.56  | 7.08E-03 |
| cg22258437 | 1 | 23886007 | GeneBody/5'UTR/1st exon   | ID3          | -5.601±0.543 | -6.085±0.586 | 1.15E-04 |
| cg12090388 | 1 | 24018356 | GeneBody/1st intron       | RPL11        | -3.82±0.229  | -4.084±0.334 | 7.85E-06 |
| cg22983885 | 1 | 24104423 | GeneBody/1st intron       | LOC100506963 | -3.909±0.352 | -4.185±0.463 | 9.07E-04 |
| cg09930410 | 1 | 24127833 | TSS1500                   | GALE         | -5.049±0.625 | -5.578±0.673 | 2.14E-04 |
| cg08673615 | 1 | 24151775 | GeneBody/1st intron       | HMGCL        | -4.168±0.302 | -4.43±0.381  | 2.51E-04 |
| cg18825999 | 1 | 24286530 | GeneBody/5'UTR/1st intron | PNRC2        | -5.128±0.653 | -5.821±0.614 | 6.97E-06 |
| cg15604008 | 1 | 24306982 | TSS200                    | SRSF10       | -4.398±0.564 | -4.866±0.573 | 2.41E-04 |
| cg26991199 | 1 | 24307153 | TSS200                    | SRSF10       | -2.954±0.355 | -3.236±0.408 | 5.67E-04 |
| cg16155382 | 1 | 24646191 | GeneBody/5'UTR/1st exon   | GRHL3        | -3.121±0.245 | -3.369±0.341 | 4.88E-05 |
| cg02641560 | 1 | 24828811 | TSS200                    | RCAN3        | -4.541±0.212 | -4.667±0.256 | 9.26E-03 |
| cg10698549 | 1 | 24969970 | GeneBody/1st intron       | SRRM1        | -5.06±0.57   | -5.612±0.548 | 2.86E-05 |
| cg04757093 | 1 | 25229192 | GeneBody                  | RUNX3        | 0.819±0.139  | 0.907±0.165  | 5.61E-03 |
| cg18813928 | 1 | 25234506 | GeneBody                  | RUNX3        | 4.436±0.339  | 4.66±0.344   | 2.64E-03 |
| cg08705994 | 1 | 25234649 | GeneBody                  | RUNX3        | 4.355±0.422  | 4.689±0.479  | 5.47E-04 |
| cg22737001 | 1 | 25257029 | TSS1500                   | RUNX3        | -3.918±0.335 | -4.216±0.45  | 2.37E-04 |
| cg17651255 | 1 | 25559743 | TSS1500                   | SYF2         | -3.034±0.545 | -3.492±0.569 | 2.17E-04 |
| cg12592463 | 1 | 25574236 | TSS1500                   | C1orf63      | -4.564±0.366 | -4.845±0.502 | 1.36E-03 |
| cg13488557 | 1 | 25574588 | TSS1500                   | C1orf63      | -3.41±0.495  | -3.92±0.609  | 2.26E-05 |
| cg21367040 | 1 | 25664857 | GeneBody/5'UTR/1st exon   | TMEM50A      | -5.399±0.527 | -5.793±0.624 | 1.14E-03 |
| cg16486059 | 1 | 26186256 | TSS1500                   | AUNIP        | -5.418±0.57  | -5.807±0.599 | 2.07E-03 |
| cg06453691 | 1 | 26218503 | GeneBody                  | STMN1        | 1.937±0.242  | 1.698±0.403  | 1.66E-04 |
| cg04722168 | 1 | 26324647 | GeneBody/5'UTR/1st exon   | PFAH2        | -4.853±0.419 | -5.242±0.425 | 5.70E-05 |
| cg15547662 | 1 | 26324823 | TSS200                    | PFAH2        | -3.578±0.565 | -4.008±0.475 | 4.73E-04 |
| cg25229964 | 1 | 26503623 | TSS1500                   | CNKSR1       | 2.22±0.2     | 2.336±0.217  | 8.39E-03 |
| cg04025590 | 1 | 26560450 | TSS1500                   | CEP85        | -4.819±0.48  | -5.32±0.516  | 1.15E-05 |
| cg14017991 | 1 | 26560780 | GeneBody/5'UTR/1st exon   | CEP85        | -4.657±0.441 | -4.931±0.491 | 5.26E-03 |
| cg03100146 | 1 | 26606846 | GeneBody/1st intron       | SH3BGR13     | -2.941±0.16  | -3.044±0.239 | 8.65E-03 |
| cg16530429 | 1 | 26737470 | GeneBody/1st intron       | LIN28A       | -2.727±0.257 | -2.556±0.374 | 5.99E-03 |
| cg14211646 | 1 | 26758996 | GeneBody/5'UTR/1st intron | DHDDS        | -3.548±0.275 | -3.708±0.238 | 5.94E-03 |
| cg17154022 | 1 | 26798964 | GeneBody/5'UTR/1st exon   | HMG2N        | -4.301±0.438 | -4.717±0.55  | 7.56E-05 |
| cg19259146 | 1 | 26856420 | GeneBody/1st exon         | RPS6KA1      | -4.214±0.297 | -4.463±0.395 | 4.76E-04 |
| cg17385674 | 1 | 27021704 | TSS1500                   | ARID1A       | -5.12±0.41   | -5.513±0.556 | 9.04E-05 |
| cg12806381 | 1 | 27114177 | TSS1500                   | PIGV         | -4.363±0.263 | -4.553±0.249 | 9.40E-04 |
| cg10971346 | 1 | 27114745 | GeneBody/5'UTR/1st exon   | PIGV         | -4.381±0.269 | -4.601±0.385 | 8.09E-04 |
| cg23489497 | 1 | 27216793 | GeneBody/5'UTR/1st exon   | GPN2         | -5.075±0.402 | -5.497±0.554 | 2.63E-05 |
| cg16417937 | 1 | 27248012 | TSS200                    | NUDC         | -5.511±0.433 | -5.863±0.546 | 5.39E-04 |
| cg08393541 | 1 | 27248425 | GeneBody/1st intron       | NUDC         | -4.56±0.366  | -4.886±0.527 | 3.13E-04 |
| cg22395192 | 1 | 27339435 | TSS200                    | FAM46B       | -4.968±0.418 | -5.338±0.504 | 1.68E-04 |
| cg06839953 | 1 | 27648457 | TSS200                    | TMEM222      | -5.485±0.667 | -5.927±0.561 | 1.86E-03 |
| cg23652939 | 1 | 27649000 | GeneBody/1st intron       | TMEM222      | -5.16±0.458  | -5.515±0.544 | 7.73E-04 |
| cg23299127 | 1 | 27693341 | TSS200                    | MAP3K6       | -3.765±0.254 | -3.946±0.401 | 4.26E-03 |
| cg19784449 | 1 | 27816456 | GeneBody/5'UTR/1st intron | WASF2        | -3.784±0.538 | -4.207±0.546 | 4.59E-04 |
| cg14887509 | 1 | 27816781 | TSS200                    | WASF2        | -5.778±0.361 | -6.125±0.411 | 4.75E-05 |
| cg20227766 | 1 | 27998703 | GeneBody/5'UTR/1st exon   | IFI6         | -4.679±0.467 | -5.075±0.603 | 3.78E-04 |
| cg10957680 | 1 | 27998883 | TSS200                    | IFI6         | -4.546±0.41  | -4.803±0.495 | 5.90E-03 |
| cg12099357 | 1 | 28052045 | TSS1500                   | FAM76A       | -4.695±0.39  | -5.042±0.595 | 3.89E-04 |
| cg17386433 | 1 | 28052708 | GeneBody/1st intron       | FAM76A       | -5.065±0.541 | -5.423±0.593 | 3.02E-03 |
| cg09009042 | 1 | 28157061 | TSS200                    | PPP1R8       | -4.291±0.262 | -4.502±0.402 | 1.23E-03 |
| cg05492605 | 1 | 28157672 | GeneBody/5'UTR/1st exon   | PPP1R8       | -5.355±0.45  | -5.686±0.557 | 1.48E-03 |
| cg11542231 | 1 | 28241192 | GeneBody/5'UTR/1st exon   | RPA2         | -4.909±0.695 | -5.408±0.623 | 9.51E-04 |
| cg22421699 | 1 | 28261367 | TSS200                    | SMPDL3B      | -2.086±0.143 | -2.199±0.222 | 1.58E-03 |
| cg00563229 | 1 | 28286146 | TSS1500                   | XKR8         | -5.158±0.418 | -5.615±0.545 | 1.10E-05 |
| cg22760576 | 1 | 28415004 | GeneBody/5'UTR/1st intron | EYA3         | -5.088±0.411 | -5.333±0.472 | 7.84E-03 |
| cg19025723 | 1 | 28562708 | GeneBody/1st exon         | ATPIF1       | -4.674±0.36  | -5.089±0.612 | 1.95E-05 |
| cg25973092 | 1 | 28585837 | TSS200                    | SES2N        | -4.888±0.382 | -5.197±0.55  | 8.97E-04 |
| cg25371560 | 1 | 28655380 | TSS200                    | MED18        | -4.729±0.45  | -5.025±0.535 | 3.94E-03 |
| cg25716286 | 1 | 28655639 | GeneBody/5'UTR/1st intron | MED18        | -5.409±0.612 | -5.786±0.669 | 5.56E-03 |
| cg16013246 | 1 | 28832468 | GeneBody/1st exon         | SNHG3        | -4.951±0.421 | -5.317±0.518 | 2.33E-04 |
| cg24469114 | 1 | 28832988 | GeneBody/5'UTR/1st intron | RCC1         | -4.73±0.383  | -4.984±0.461 | 3.62E-03 |
| cg20117778 | 1 | 28969554 | GeneBody/5'UTR/1st exon   | TAF12        | -4.806±0.342 | -5.158±0.54  | 6.84E-05 |
| cg23543604 | 1 | 28969705 | TSS200                    | TAF12        | -4.822±0.281 | -5.11±0.325  | 1.95E-05 |
| cg11226328 | 1 | 29213367 | TSS1500                   | EPB41        | -4.106±0.347 | -4.447±0.428 | 4.59E-05 |

|            |   |          |                           |          |              |              |          |
|------------|---|----------|---------------------------|----------|--------------|--------------|----------|
| cg18189938 | 1 | 29213863 | GeneBody/5'UTR/1st intron | EPB41    | -5.84±0.512  | -6.381±0.538 | 9.29E-06 |
| cg14195915 | 1 | 29507864 | GeneBody/1st intron       | SRSF4    | -4.566±0.598 | -4.988±0.574 | 1.31E-03 |
| cg05032943 | 1 | 29508776 | TSS200                    | SRSF4    | -3.886±0.386 | -4.181±0.497 | 1.16E-03 |
| cg19112780 | 1 | 29563147 | GeneBody/5'UTR/1st exon   | PTPRU    | -4.967±0.558 | -5.301±0.634 | 7.48E-03 |
| cg12732155 | 1 | 31230601 | GeneBody/5'UTR/1st exon   | LAPTM5   | -0.402±0.286 | -0.578±0.336 | 6.42E-03 |
| cg13436343 | 1 | 31538432 | GeneBody/5'UTR/1st intron | PUM1     | -5.3±0.34    | -5.812±0.538 | 1.07E-07 |
| cg24710886 | 1 | 31538937 | TSS1500                   | PUM1     | -4.173±0.342 | -4.486±0.503 | 2.42E-04 |
| cg08778586 | 1 | 31769778 | TSS200                    | ZCCHC17  | -4.831±0.398 | -5.289±0.518 | 4.99E-06 |
| cg03484533 | 1 | 31846491 | TSS1500                   | FABP3    | -5.538±0.704 | -6.005±0.621 | 1.98E-03 |
| cg02309594 | 1 | 32084329 | GeneBody/5'UTR/1st intron | HCRTR1   | 1.217±0.329  | 0.96±0.384   | 6.87E-04 |
| cg13299148 | 1 | 32170433 | TSS1500                   | COL16A1  | -3.549±0.35  | -3.818±0.432 | 9.54E-04 |
| cg06397510 | 1 | 32403634 | GeneBody/5'UTR/1st exon   | PTP4A2   | -4.577±0.383 | -4.934±0.682 | 5.00E-04 |
| cg10184881 | 1 | 32404326 | TSS1500                   | PTP4A2   | -5.359±0.268 | -5.515±0.308 | 9.42E-03 |
| cg21713812 | 1 | 32480195 | GeneBody/1st intron       | KHDRBS1  | -5.716±0.419 | -6.03±0.511  | 1.17E-03 |
| cg21682382 | 1 | 32538052 | TSS1500                   | TMEM39B  | -3.974±0.26  | -4.315±0.399 | 1.15E-06 |
| cg10266188 | 1 | 32645867 | GeneBody/5'UTR/1st intron | XLNA     | -4.69±0.495  | -5.006±0.398 | 2.52E-03 |
| cg02286990 | 1 | 32666098 | TSS200                    | CCDC28B  | -4.015±0.226 | -4.258±0.401 | 7.94E-05 |
| cg13704271 | 1 | 32666264 | GeneBody/5'UTR/1st exon   | CCDC28B  | -4.307±0.345 | -4.629±0.363 | 5.76E-05 |
| cg24137081 | 1 | 32671413 | GeneBody/1st intron       | IQCC     | -5.284±0.409 | -5.703±0.521 | 2.85E-05 |
| cg26073060 | 1 | 32686736 | GeneBody                  | TMEM234  | 2.168±0.286  | 2.378±0.325  | 1.25E-03 |
| cg09327628 | 1 | 32801665 | GeneBody/1st intron       | MARCKSL1 | -4.838±0.432 | -5.201±0.357 | 1.44E-04 |
| cg26131911 | 1 | 33116503 | TSS1500                   | RBBP4    | -5.095±0.406 | -5.454±0.535 | 2.41E-04 |
| cg23150609 | 1 | 33283992 | TSS1500                   | YARS     | -5.656±0.576 | -6.18±0.476  | 4.92E-05 |
| cg13306164 | 1 | 33352184 | GeneBody/5'UTR/1st intron | HPCA     | -4.845±0.503 | -5.163±0.685 | 7.39E-03 |
| cg27287498 | 1 | 33429490 | GeneBody/1st intron       | RNF19B   | -4.519±0.436 | -4.884±0.456 | 2.33E-04 |
| cg18830459 | 1 | 33429781 | GeneBody/1st exon         | RNF19B   | -6.218±0.542 | -6.772±0.62  | 2.00E-05 |
| cg15554401 | 1 | 35226891 | GeneBody                  | GJB4     | 2.612±0.229  | 2.891±0.432  | 1.63E-05 |
| cg13263483 | 1 | 35247084 | GeneBody/5'UTR/1st exon   | GJB3     | -3.909±0.287 | -4.14±0.398  | 8.49E-04 |
| cg07070934 | 1 | 35258435 | TSS200                    | GJA4     | -3.804±0.245 | -4.103±0.442 | 1.20E-05 |
| cg20913782 | 1 | 35325533 | TSS200                    | SMIM12   | -5.423±0.502 | -5.768±0.477 | 1.60E-03 |
| cg22459359 | 1 | 35497285 | GeneBody/5'UTR/1st intron | ZMYM6    | -6.02±0.459  | -6.647±0.643 | 3.41E-07 |
| cg15315630 | 1 | 35497506 | GeneBody/5'UTR/1st exon   | ZMYM6    | -5.333±0.346 | -5.684±0.313 | 1.26E-05 |
| cg11730961 | 1 | 35658733 | GeneBody/5'UTR/1st exon   | SFPQ     | -3.481±0.234 | -3.635±0.297 | 4.49E-03 |
| cg21248774 | 1 | 35658951 | TSS1500                   | SFPQ     | -4.905±0.623 | -5.241±0.497 | 9.81E-03 |
| cg19524049 | 1 | 36023720 | GeneBody/5'UTR/1st intron | NCDN     | -5.157±0.336 | -5.483±0.5   | 1.19E-04 |
| cg27094188 | 1 | 36348278 | TSS1500                   | AGO1     | 2.226±0.264  | 2.443±0.428  | 1.26E-03 |
| cg24196046 | 1 | 36396054 | TSS1500                   | AGO3     | -3.264±0.591 | -3.82±0.592  | 1.82E-03 |
| cg14308291 | 1 | 36396265 | TSS1500                   | AGO3     | -3.904±0.617 | -4.436±0.637 | 1.56E-04 |
| cg24813212 | 1 | 36549726 | GeneBody/5'UTR/1st exon   | TEKT2    | -5.012±0.563 | -5.393±0.57  | 2.08E-03 |
| cg24547948 | 1 | 36554901 | GeneBody/1st intron       | ADPRHL2  | -4.75±0.435  | -5.151±0.588 | 1.51E-04 |
| cg19046959 | 1 | 36565856 | TSS200                    | COL8A2   | -2.764±0.413 | -3.116±0.429 | 1.79E-04 |
| cg16705481 | 1 | 36615026 | GeneBody/5'UTR/1st exon   | TRAPPC3  | -4.983±0.583 | -5.533±0.721 | 7.97E-05 |
| cg11916186 | 1 | 36689760 | TSS1500                   | THRAP3   | -4.638±0.359 | -4.886±0.5   | 3.81E-03 |
| cg07789552 | 1 | 36851195 | GeneBody/5'UTR/1st intron | STK40    | -3.386±0.174 | -3.578±0.288 | 3.52E-05 |
| cg01773061 | 1 | 36863007 | GeneBody/5'UTR/1st intron | LSM10    | -4.687±0.405 | -5.054±0.522 | 1.58E-04 |
| cg10035922 | 1 | 36916039 | GeneBody/5'UTR/1st exon   | OSCP1    | -4.401±0.481 | -4.752±0.396 | 7.31E-04 |
| cg22397854 | 1 | 36916501 | TSS1500                   | OSCP1    | -4.517±0.358 | -4.779±0.373 | 1.05E-03 |
| cg05154390 | 1 | 36929274 | GeneBody                  | MRPS15   | -2.436±0.222 | -2.621±0.278 | 4.23E-04 |
| cg08198370 | 1 | 36930120 | TSS200                    | MRPS15   | -4.856±0.307 | -5.157±0.466 | 1.12E-04 |
| cg03112782 | 1 | 37979729 | GeneBody/1st intron       | MEAF6    | -4.082±0.207 | -4.232±0.242 | 1.56E-03 |
| cg00728398 | 1 | 37980699 | TSS1500                   | MEAF6    | -5.876±0.701 | -6.357±0.569 | 1.34E-03 |
| cg26624273 | 1 | 38019894 | GeneBody/5'UTR/1st exon   | SNIP1    | -4.549±0.419 | -4.906±0.556 | 3.89E-04 |
| cg06528936 | 1 | 38061398 | GeneBody/1st exon         | GNL2     | -5.375±0.342 | -5.661±0.481 | 5.96E-04 |
| cg06626655 | 1 | 38099916 | GeneBody/5'UTR/1st intron | RSPO1    | -3.295±0.248 | -3.636±0.436 | 1.20E-06 |
| cg26649834 | 1 | 38156051 | GeneBody/5'UTR/1st exon   | C1orf109 | -5.424±0.371 | -5.754±0.372 | 9.66E-05 |
| cg21010197 | 1 | 38158425 | GeneBody/1st exon         | CDCA8    | -5.307±0.442 | -5.608±0.464 | 2.16E-03 |
| cg01214209 | 1 | 38258995 | TSS1500                   | MANEAL   | 0.683±0.192  | 0.813±0.212  | 2.50E-03 |
| cg08735298 | 1 | 38273312 | TSS200                    | C1orf122 | -4.357±0.427 | -4.68±0.538  | 1.19E-03 |
| cg17829314 | 1 | 38274017 | TSS200                    | YRDC     | -5.557±0.553 | -6.027±0.56  | 1.80E-04 |
| cg07031996 | 1 | 38324738 | GeneBody/5'UTR/1st intron | MTF1     | -3.305±0.268 | -3.525±0.388 | 8.09E-04 |
| cg18333824 | 1 | 38455588 | GeneBody/1st exon         | SF3A3    | -4.917±0.397 | -5.294±0.512 | 8.44E-05 |
| cg25682936 | 1 | 38455768 | TSS200                    | SF3A3    | -2.388±0.156 | -2.625±0.304 | 4.96E-07 |
| cg23495059 | 1 | 39324743 | GeneBody/1st intron       | RRAGC    | -4.76±0.567  | -5.214±0.559 | 3.50E-04 |
| cg12792157 | 1 | 39339004 | GeneBody/5'UTR/1st exon   | MYCBP    | -5.614±0.741 | -6.167±0.475 | 4.34E-04 |
| cg00521598 | 1 | 39339413 | TSS1500                   | MYCBP    | -3.555±0.357 | -3.923±0.509 | 4.24E-05 |
| cg14676817 | 1 | 39457257 | GeneBody/1st exon         | AKIRIN1  | -4.979±0.484 | -5.324±0.461 | 1.15E-03 |
| cg22233974 | 1 | 39546511 | 0                         | 0        | -1.181±0.284 | -1.355±0.323 | 6.25E-03 |
| cg08866753 | 1 | 40042061 | GeneBody/5'UTR/1st exon   | PABPC4   | -5.585±0.559 | -5.908±0.526 | 7.27E-03 |
| cg12585282 | 1 | 40042727 | TSS1500                   | PABPC4   | -3.033±0.215 | -3.169±0.305 | 8.27E-03 |
| cg22827640 | 1 | 40157125 | TSS200                    | HPCAL4   | -6.28±0.585  | -6.636±0.515 | 4.32E-03 |
| cg08063724 | 1 | 40367097 | GeneBody                  | MYCL     | -4.938±0.53  | -5.326±0.617 | 1.33E-03 |
| cg16796590 | 1 | 40420668 | TSS200                    | MFSD2A   | -3.961±0.362 | -4.208±0.605 | 7.73E-03 |
| cg09182986 | 1 | 40505999 | TSS1500                   | CAP1     | -4.154±0.348 | -4.448±0.409 | 2.86E-04 |
| cg13502356 | 1 | 40723396 | TSS1500                   | ZMPSTE24 | -5.18±0.441  | -5.483±0.405 | 1.54E-03 |
| cg25632203 | 1 | 40915497 | TSS1500                   | ZFP69B   | -4.781±0.364 | -5.259±0.502 | 6.58E-07 |
| cg03648823 | 1 | 40915636 | TSS1500                   | ZFP69B   | -4.702±0.576 | -5.137±0.596 | 8.34E-04 |
| cg26776069 | 1 | 40974239 | TSS200                    | EXO5     | -4.919±0.328 | -5.407±0.556 | 1.98E-07 |
| cg25568243 | 1 | 40974465 | GeneBody/5'UTR/1st exon   | EXO5     | -5.471±0.682 | -6.075±0.606 | 8.21E-05 |
| cg10521267 | 1 | 40997127 | TSS200                    | ZNF684   | -4.18±0.523  | -4.504±0.512 | 4.39E-03 |
| cg06211871 | 1 | 40997551 | GeneBody/5'UTR/1st intron | ZNF684   | -4.22±0.524  | -4.669±0.553 | 1.74E-04 |
| cg13730534 | 1 | 41157553 | TSS200                    | NFYC     | -3.95±0.197  | -4.168±0.303 | 2.05E-05 |
| cg00630164 | 1 | 41250062 | GeneBody/1st exon         | KCNQ4    | -3.272±0.351 | -3.492±0.488 | 8.31E-03 |
| cg02668729 | 1 | 41445680 | GeneBody/5'UTR/1st intron | CTPS1    | -5.129±0.39  | -5.544±0.511 | 1.66E-05 |
| cg14550007 | 1 | 41707370 | GeneBody/5'UTR/1st intron | SCMH1    | -6.257±0.707 | -6.902±0.618 | 5.42E-05 |
| cg03387723 | 1 | 41708464 | TSS1500                   | SCMH1    | 2.029±0.304  | 2.214±0.395  | 8.85E-03 |
| cg17100200 | 1 | 42618313 | TSS1500                   | GUCA2B   | 3.074±0.23   | 3.253±0.364  | 1.99E-03 |
| cg20757758 | 1 | 42922000 | TSS200                    | ZMYND12  | -4.905±0.356 | -5.288±0.47  | 1.55E-05 |
| cg17994910 | 1 | 42948516 | 0                         | 0        | 0.375±0.351  | -0.121±0.571 | 6.15E-07 |
| cg02150709 | 1 | 43123922 | TSS200                    | PIIH     | -5.027±0.527 | -5.505±0.554 | 8.46E-05 |
| cg04048218 | 1 | 43124122 | GeneBody/1st exon         | PPIH     | -4.465±0.236 | -4.609±0.257 | 5.76E-03 |
| cg00650876 | 1 | 43148058 | TSS200                    | YBX1     | -5.726±0.455 | -6.152±0.587 | 1.01E-04 |
| cg12799265 | 1 | 43231483 | GeneBody/1st intron       | LEPRE1   | -2.946±0.396 | -3.317±0.483 | 8.20E-05 |
| cg17330200 | 1 | 43282561 | TSS1500                   | ERMAP    | -4.26±0.515  | -4.712±0.592 | 1.61E-04 |
| cg19101893 | 1 | 43283862 | TSS1500                   | CCDC23   | 1.849±0.221  | 1.705±0.276  | 4.66E-03 |
| cg19552482 | 1 | 43312486 | GeneBody/5'UTR/1st intron | ZNF691   | -4.649±0.622 | -5.12±0.545  | 5.41E-04 |

|            |   |          |                           |          |              |              |          |
|------------|---|----------|---------------------------|----------|--------------|--------------|----------|
| cg06792911 | 1 | 43425022 | TSS200                    | SLC2A1   | -5.108±0.593 | -5.434±0.498 | 8.83E-03 |
| cg16725097 | 1 | 43637592 | GeneBody                  | EBNA1BP2 | -4.18±0.414  | -4.59±0.557  | 5.64E-05 |
| cg13342625 | 1 | 43638094 | GeneBody/5'UTR/1st exon   | WDR65    | -5.238±0.35  | -5.727±0.516 | 2.77E-07 |
| cg01095482 | 1 | 43765796 | TSS1500                   | TIE1     | 2.433±0.288  | 2.6±0.314    | 8.90E-03 |
| cg03793131 | 1 | 43833547 | TSS200                    | ELOVL1   | -4.628±0.488 | -5.037±0.581 | 3.29E-04 |
| cg07299462 | 1 | 43855490 | TSS200                    | MED8     | -5.433±0.425 | -6.024±0.661 | 4.65E-07 |
| cg13233799 | 1 | 43996745 | GeneBody/5'UTR/1st exon   | PTPRF    | -4.435±0.319 | -4.786±0.57  | 5.61E-05 |
| cg10968649 | 1 | 44115804 | GeneBody/5'UTR/1st exon   | KDM4A    | -5.525±0.53  | -6.008±0.491 | 6.14E-05 |
| cg08552254 | 1 | 44115979 | GeneBody/5'UTR/1st intron | KDM4A    | -1.99±0.409  | -1.572±0.703 | 1.23E-04 |
| cg17771854 | 1 | 44412679 | GeneBody/5'UTR/1st exon   | IPO13    | -5.303±0.46  | -5.72±0.667  | 2.56E-04 |
| cg25955969 | 1 | 44435627 | TSS200                    | DPH2     | -4.937±0.392 | -5.225±0.435 | 1.18E-03 |
| cg19903333 | 1 | 44441367 | GeneBody/1st intron       | ATP6V0B  | -3.228±0.331 | -2.834±0.403 | 2.15E-06 |
| cg04323187 | 1 | 44457159 | TSS200                    | CCDC24   | -5.401±0.605 | -5.932±0.563 | 9.89E-05 |
| cg20975478 | 1 | 44457319 | GeneBody/5'UTR/1st exon   | CCDC24   | -3.182±0.15  | -3.351±0.292 | 6.95E-05 |
| cg18937321 | 1 | 44497024 | GeneBody/1st exon         | SLC6A9   | -4.566±0.385 | -4.832±0.417 | 1.98E-03 |
| cg18202456 | 1 | 44584930 | GeneBody/1st intron       | KLF17    | 5.099±0.321  | 5.37±0.408   | 3.82E-04 |
| cg01267315 | 1 | 44870976 | GeneBody/5'UTR/1st exon   | RNF220   | -4.023±0.267 | -4.224±0.384 | 1.84E-03 |
| cg02890926 | 1 | 45140355 | TSS200                    | C1orf228 | -5.8±0.608   | -6.262±0.54  | 5.16E-04 |
| cg03907454 | 1 | 45205136 | TSS1500                   | KIF2C    | -4.112±0.452 | -4.441±0.508 | 1.30E-03 |
| cg07550267 | 1 | 45241824 | TSS1500                   | SNORD46  | -4.47±0.291  | -4.905±0.549 | 4.99E-07 |
| cg00904574 | 1 | 45265678 | TSS1500                   | PLK3     | -4.763±0.457 | -5.223±0.712 | 9.04E-05 |
| cg27287808 | 1 | 45266048 | GeneBody/5'UTR/1st exon   | PLK3     | -5.167±0.517 | -5.689±0.448 | 1.22E-05 |
| cg22920538 | 1 | 45476463 | GeneBody/1st intron       | HECTD3   | -4.638±0.437 | -4.919±0.436 | 3.25E-03 |
| cg16613192 | 1 | 45477977 | GeneBody/1st intron       | UROD     | -3.754±0.22  | -3.613±0.337 | 9.28E-03 |
| cg10797195 | 1 | 45805338 | TSS200                    | TOE1     | -3.544±0.254 | -3.885±0.365 | 5.54E-07 |
| cg25827112 | 1 | 45956773 | GeneBody/5'UTR/1st exon   | TESK2    | -4.963±0.333 | -5.399±0.496 | 1.01E-06 |
| cg00609097 | 1 | 45956974 | TSS200                    | TESK2    | -5.426±0.469 | -5.894±0.531 | 2.76E-05 |
| cg21319693 | 1 | 45987459 | GeneBody/5'UTR/1st intron | PRDX1    | -4.2±0.482   | -4.581±0.561 | 6.13E-04 |
| cg12477012 | 1 | 46049214 | TSS1500                   | NASP     | -4.697±0.383 | -4.923±0.363 | 6.10E-03 |
| cg09893068 | 1 | 46089593 | GeneBody/5'UTR/1st exon   | CCDC17   | 2.057±0.258  | 1.847±0.435  | 1.65E-03 |
| cg17533684 | 1 | 46597933 | GeneBody/5'UTR/1st exon   | PIK3R3   | -4.988±0.428 | -5.278±0.383 | 1.69E-03 |
| cg26294850 | 1 | 46645697 | GeneBody/5'UTR/1st intron | TSPAN1   | -3.596±0.25  | -3.872±0.383 | 2.06E-05 |
| cg08176609 | 1 | 46664284 | TSS200                    | POMGNT1  | -5.671±0.42  | -5.92±0.496  | 8.52E-03 |
| cg03262773 | 1 | 46712613 | TSS1500                   | RAD54L   | -2.951±0.467 | -2.501±0.56  | 5.28E-05 |
| cg17079378 | 1 | 46713440 | GeneBody/5'UTR/1st exon   | RAD54L   | -6.036±0.524 | -6.482±0.48  | 1.45E-04 |
| cg26601286 | 1 | 46806355 | TSS1500                   | NSUN4    | -5.536±0.495 | -5.932±0.494 | 3.63E-04 |
| cg15305343 | 1 | 46806357 | TSS1500                   | NSUN4    | -6.233±0.768 | -6.737±0.668 | 2.17E-03 |
| cg15445332 | 1 | 47069792 | GeneBody/5'UTR/1st intron | MKNK1    | -5.366±0.344 | -5.761±0.459 | 5.49E-06 |
| cg23786576 | 1 | 47133596 | GeneBody/1st intron       | ATPAF1   | -4.732±0.263 | -5.017±0.302 | 8.32E-06 |
| cg06240849 | 1 | 47184738 | TSS200                    | EFCAB14  | -4.811±0.572 | -5.232±0.564 | 8.72E-04 |
| cg00128766 | 1 | 47185216 | TSS1500                   | EFCAB14  | -2.976±0.403 | -3.253±0.474 | 2.50E-03 |
| cg23440155 | 1 | 47264601 | TSS200                    | CYP4B1   | -1.096±0.252 | -0.934±0.329 | 5.59E-03 |
| cg19714296 | 1 | 47407400 | TSS1500                   | CYP4A11  | 2.331±0.173  | 2.452±0.194  | 1.97E-03 |
| cg15187606 | 1 | 47656853 | TSS1500                   | PDZK1IP1 | 2.912±0.198  | 3.04±0.227   | 4.25E-03 |
| cg20623943 | 1 | 47799834 | GeneBody/1st intron       | CMKP1    | -5.36±0.416  | -5.628±0.533 | 5.49E-03 |
| cg14106085 | 1 | 47902269 | GeneBody/5'UTR/1st exon   | FOXO2    | -3.096±0.254 | -3.375±0.342 | 1.16E-05 |
| cg01145389 | 1 | 51433840 | TSS1500                   | CDKN2C   | -5.098±0.45  | -5.394±0.478 | 2.92E-03 |
| cg10450322 | 1 | 51434373 | GeneBody/5'UTR/1st exon   | CDKN2C   | -3.621±0.423 | -4.043±0.527 | 3.86E-05 |
| cg05923103 | 1 | 51701583 | TSS1500                   | RNF11    | -4.579±0.434 | -5.011±0.468 | 2.50E-05 |
| cg10089324 | 1 | 51984752 | GeneBody/1st intron       | EPS15    | -2.902±0.155 | -3.091±0.294 | 1.73E-05 |
| cg14407667 | 1 | 51985209 | TSS1500                   | EPS15    | -4.075±0.391 | -4.415±0.414 | 1.53E-04 |
| cg10482750 | 1 | 52344120 | TSS1500                   | NRD1     | -5.59±0.409  | -5.832±0.369 | 5.57E-03 |
| cg12688215 | 1 | 52499228 | GeneBody/1st exon         | KTI12    | -6.133±0.496 | -6.549±0.596 | 3.33E-04 |
| cg15683488 | 1 | 52607471 | TSS1500                   | ZFYVE9   | -3.327±0.415 | -3.622±0.635 | 3.90E-03 |
| cg10586599 | 1 | 52870280 | GeneBody/5'UTR/1st exon   | PRPF38A  | -4.052±0.306 | -4.279±0.481 | 3.03E-03 |
| cg02917972 | 1 | 53018259 | GeneBody/5'UTR/1st intron | ZCCHC11  | -4.484±0.448 | -4.931±0.524 | 3.04E-05 |
| cg07347137 | 1 | 53019316 | TSS1500                   | ZCCHC11  | -4.664±0.49  | -5.071±0.401 | 1.61E-04 |
| cg04310824 | 1 | 53393297 | GeneBody/1st intron       | SCP2     | -5.318±0.428 | -5.605±0.614 | 5.45E-03 |
| cg01100796 | 1 | 53662040 | TSS200                    | CPT2     | -2.732±0.426 | -3.311±0.562 | 2.76E-07 |
| cg10321208 | 1 | 53662243 | GeneBody/5'UTR/1st exon   | CPT2     | -3.906±0.477 | -4.214±0.539 | 3.99E-03 |
| cg21849289 | 1 | 53686523 | TSS1500                   | C1orf123 | -5.57±0.436  | -5.912±0.429 | 4.48E-04 |
| cg11841758 | 1 | 53704358 | TSS200                    | MAGOH    | -4.081±0.283 | -4.278±0.364 | 2.90E-03 |
| cg02502132 | 1 | 53792939 | GeneBody/1st intron       | LRP8     | -5.475±0.373 | -5.75±0.36   | 8.37E-04 |
| cg13262752 | 1 | 54355695 | TSS1500                   | YIPF1    | -3.686±0.375 | -3.947±0.55  | 4.18E-03 |
| cg19526600 | 1 | 54360115 | GeneBody/1st exon         | DIO1     | 0.475±0.252  | 0.63±0.326   | 8.17E-03 |
| cg19400876 | 1 | 54411017 | GeneBody/5'UTR/1st intron | HSPB11   | -4.695±0.367 | -5.111±0.536 | 1.03E-05 |
| cg05341670 | 1 | 54518153 | GeneBody/1st intron       | TMEM59   | -5.479±0.41  | -5.773±0.396 | 1.12E-03 |
| cg10362426 | 1 | 54518856 | GeneBody/1st exon         | TMEM59   | -3.254±0.209 | -3.418±0.341 | 1.96E-03 |
| cg15034763 | 1 | 54519040 | GeneBody/5'UTR/1st exon   | TMEM59   | -3.996±0.396 | -4.282±0.543 | 2.43E-03 |
| cg15309223 | 1 | 54519091 | GeneBody/5'UTR/1st exon   | TMEM59   | -4.797±0.337 | -5.053±0.532 | 2.51E-03 |
| cg04853151 | 1 | 54519244 | TSS200                    | TCEANC2  | -3.031±0.317 | -3.297±0.351 | 2.72E-04 |
| cg22813220 | 1 | 54519286 | GeneBody/5'UTR/1st exon   | TCEANC2  | -5.095±0.582 | -5.744±0.613 | 4.02E-06 |
| cg02239021 | 1 | 54665433 | GeneBody/5'UTR/1st intron | CYB5RL   | -4.538±0.336 | -4.76±0.254  | 1.72E-03 |
| cg14314795 | 1 | 55181614 | GeneBody/1st exon         | TTC4     | -5.282±0.355 | -5.821±0.511 | 4.50E-08 |
| cg10322308 | 1 | 55229957 | GeneBody/5'UTR/1st intron | PARS2    | -5.166±0.425 | -5.466±0.562 | 2.69E-03 |
| cg18014844 | 1 | 55230402 | TSS200                    | PARS2    | -4.637±0.339 | -4.951±0.455 | 1.33E-04 |
| cg03557698 | 1 | 55271921 | GeneBody/1st intron       | C1orf177 | 3.592±0.54   | 3.907±0.578  | 8.05E-03 |
| cg05494069 | 1 | 57111499 | GeneBody/1st intron       | PRKAA2   | -3.68±0.289  | -3.945±0.394 | 1.68E-04 |
| cg19213569 | 1 | 59762605 | TSS200                    | FGGY     | -4.024±0.321 | -4.379±0.441 | 1.17E-05 |
| cg18870231 | 1 | 60539135 | GeneBody/5'UTR/1st intron | C1orf87  | 1.542±0.176  | 1.675±0.228  | 1.36E-03 |
| cg20289988 | 1 | 61547758 | TSS1500                   | NFIA     | -3.869±0.271 | -4.215±0.393 | 1.32E-06 |
| cg10069638 | 1 | 61548754 | GeneBody/1st intron       | NFIA     | -5.134±0.519 | -5.53±0.439  | 1.04E-03 |
| cg10139846 | 1 | 62207966 | TSS200                    | INADL    | -5.421±0.537 | -5.818±0.607 | 1.13E-03 |
| cg14850026 | 1 | 62660191 | TSS1500                   | L1TD1    | 1.212±0.163  | 1.37±0.223   | 7.98E-05 |
| cg16235860 | 1 | 62902122 | GeneBody/5'UTR/1st exon   | USP1     | -5.619±0.393 | -5.949±0.369 | 1.74E-04 |
| cg03370542 | 1 | 63249606 | TSS200                    | ATG4C    | -3.169±0.668 | -3.549±0.613 | 7.71E-03 |
| cg18464559 | 1 | 63989278 | GeneBody/5'UTR/1st exon   | EFCAB7   | -5.573±0.603 | -6.093±0.521 | 1.09E-04 |
| cg25013852 | 1 | 64058941 | TSS200                    | PGM1     | -4.819±0.442 | -5.207±0.475 | 1.34E-04 |
| cg05210526 | 1 | 64059049 | GeneBody/5'UTR/1st exon   | PGM1     | -5.336±0.445 | -5.77±0.516  | 4.27E-05 |
| cg15364303 | 1 | 64239391 | TSS1500                   | ROR1     | -3.793±0.271 | -4.053±0.366 | 8.75E-05 |
| cg26317111 | 1 | 64669415 | TSS200                    | UBE2U    | 3.298±0.24   | 3.606±0.427  | 4.53E-06 |
| cg21655790 | 1 | 65886077 | TSS200                    | LEPROT   | -2.487±0.557 | -2.862±0.537 | 2.06E-03 |
| cg13446852 | 1 | 65886635 | GeneBody/5'UTR/1st intron | LEPROT   | -5.751±0.493 | -6.03±0.447  | 7.96E-03 |
| cg26832142 | 1 | 66258441 | GeneBody/5'UTR/1st intron | PDE4B    | -3.119±0.313 | -3.379±0.456 | 7.39E-04 |
| cg08660285 | 1 | 67390436 | GeneBody/1st exon         | WDR78    | -2.82±0.213  | -2.983±0.257 | 9.17E-04 |

|            |   |           |                           |                     |              |              |          |
|------------|---|-----------|---------------------------|---------------------|--------------|--------------|----------|
| cg06894381 | 1 | 67519805  | GeneBody/5'UTR/1st exon   | <i>SLC35D1</i>      | -4.733±0.322 | -4.946±0.326 | 2.51E-03 |
| cg27416067 | 1 | 67773128  | GeneBody/5'UTR/1st exon   | <i>IL12RB2</i>      | -4.235±0.38  | -4.45±0.362  | 8.30E-03 |
| cg27462969 | 1 | 67896192  | TSS200                    | <i>SERBP1</i>       | -4.621±0.191 | -4.79±0.261  | 2.71E-04 |
| cg07000785 | 1 | 68150823  | TSS200                    | <i>GADD45A</i>      | -3.589±0.236 | -3.804±0.303 | 1.47E-04 |
| cg18795395 | 1 | 68298565  | GeneBody/5'UTR/1st intron | <i>GNG12</i>        | -4.426±0.441 | -4.845±0.551 | 7.79E-05 |
| cg02317907 | 1 | 68515788  | GeneBody/5'UTR/1st intron | <i>DIRAS3</i>       | 0.728±0.135  | 0.812±0.148  | 8.35E-03 |
| cg11465163 | 1 | 68516093  | GeneBody/5'UTR/1st intron | <i>DIRAS3</i>       | 0.177±0.149  | 0.291±0.171  | 7.79E-04 |
| cg12986021 | 1 | 68516627  | TSS200                    | <i>DIRAS3</i>       | -0.26±0.21   | -0.389±0.231 | 5.70E-03 |
| cg16598810 | 1 | 68962176  | GeneBody/1st intron       | <i>DEPDC1</i>       | -4.392±0.348 | -4.667±0.457 | 6.38E-04 |
| cg16666456 | 1 | 70671441  | GeneBody/5'UTR/1st exon   | <i>SRSF11</i>       | -5.446±0.508 | -5.899±0.563 | 1.20E-04 |
| cg02917772 | 1 | 70876623  | TSS1500                   | <i>CTH</i>          | -4.039±0.286 | -4.226±0.277 | 2.65E-03 |
| cg21032203 | 1 | 71546840  | GeneBody/5'UTR/1st exon   | <i>ZRANB2</i>       | -4.23±0.52   | -4.542±0.52  | 5.86E-03 |
| cg00402366 | 1 | 74663750  | GeneBody/5'UTR/1st exon   | <i>LRRIQ3</i>       | -4.934±0.475 | -5.22±0.504  | 6.29E-03 |
| cg26855724 | 1 | 75198818  | TSS200                    | <i>TYW3</i>         | -5.143±0.421 | -5.397±0.56  | 9.95E-03 |
| cg26752657 | 1 | 75199075  | GeneBody/5'UTR/1st exon   | <i>CRYZ</i>         | -4.633±0.442 | -4.999±0.366 | 1.70E-04 |
| cg05467918 | 1 | 76189945  | TSS200                    | <i>ACADM</i>        | -4.894±0.385 | -5.518±0.588 | 1.46E-08 |
| cg27478651 | 1 | 76190428  | GeneBody/5'UTR/1st exon   | <i>ACADM</i>        | -5.351±0.389 | -5.86±0.624  | 1.58E-06 |
| cg04940515 | 1 | 76251865  | TSS200                    | <i>RABGGTB</i>      | -5.05±0.653  | -5.719±0.642 | 1.24E-05 |
| cg09458394 | 1 | 76251976  | GeneBody/1st intron       | <i>RABGGTB</i>      | -4.366±0.708 | -4.887±0.594 | 6.71E-04 |
| cg22035229 | 1 | 76262648  | GeneBody/5'UTR/1st exon   | <i>MSH4</i>         | 2.165±0.423  | 2.425±0.495  | 6.38E-03 |
| cg12601757 | 1 | 76540465  | GeneBody/5'UTR/1st exon   | <i>ST6GALNAC3</i>   | -3.913±0.339 | -4.119±0.433 | 8.28E-03 |
| cg13823136 | 1 | 77333138  | TSS200                    | <i>ST6GALNAC5</i>   | -5.03±0.504  | -5.379±0.517 | 1.72E-03 |
| cg18299211 | 1 | 77685015  | GeneBody/1st exon         | <i>PIGK</i>         | -5.271±0.337 | -5.494±0.323 | 2.36E-03 |
| cg25604883 | 1 | 77747387  | TSS1500                   | <i>AK5</i>          | -3.815±0.379 | -4.116±0.521 | 9.60E-04 |
| cg04127303 | 1 | 78148262  | GeneBody/5'UTR/1st intron | <i>ZZZ3</i>         | -4.325±0.43  | -4.598±0.554 | 6.18E-03 |
| cg18666238 | 1 | 78444712  | GeneBody/5'UTR/1st exon   | <i>FUBP1</i>        | -4.87±0.373  | -5.076±0.32  | 8.68E-03 |
| cg21968580 | 1 | 78470640  | GeneBody/5'UTR/1st exon   | <i>DNAJB4</i>       | -3.244±0.393 | -3.584±0.506 | 2.84E-04 |
| cg09107315 | 1 | 78511488  | TSS200                    | <i>GIPC2</i>        | -1.149±0.231 | -1.318±0.295 | 1.68E-03 |
| cg24022301 | 1 | 78956570  | TSS200                    | <i>PTGFR</i>        | -3.302±0.302 | -3.515±0.438 | 3.57E-03 |
| cg06628693 | 1 | 84543156  | TSS1500                   | <i>PRKACB</i>       | -3.658±0.397 | -3.934±0.493 | 2.56E-03 |
| cg23698058 | 1 | 84544097  | GeneBody/1st intron       | <i>PRKACB</i>       | -6.001±0.567 | -6.457±0.538 | 3.08E-04 |
| cg03622431 | 1 | 84864880  | GeneBody/1st intron       | <i>DNASE2B</i>      | 2.579±0.184  | 2.744±0.255  | 2.42E-04 |
| cg00810495 | 1 | 84944867  | TSS200                    | <i>RPF1</i>         | -3.591±0.389 | -3.878±0.529 | 1.88E-03 |
| cg21280384 | 1 | 84945307  | GeneBody/1st intron       | <i>RPF1</i>         | -4.296±0.462 | -4.805±0.519 | 5.93E-06 |
| cg08380539 | 1 | 85039702  | GeneBody/1st intron       | <i>CTBS</i>         | -4.503±0.404 | -4.906±0.412 | 2.12E-05 |
| cg23142964 | 1 | 85156566  | TSS1500                   | <i>SSX2IP</i>       | -5.738±0.316 | -6.139±0.532 | 3.83E-06 |
| cg23752923 | 1 | 85513892  | GeneBody/5'UTR/1st intron | <i>MCOLN3</i>       | -5.209±0.502 | -5.61±0.445  | 2.96E-04 |
| cg10515956 | 1 | 85514610  | TSS1500                   | <i>MCOLN3</i>       | -2.771±0.327 | -2.991±0.387 | 3.12E-03 |
| cg03848145 | 1 | 85724702  | GeneBody/1st intron       | <i>C1orf52</i>      | -4.188±0.321 | -4.363±0.281 | 9.91E-03 |
| cg05475904 | 1 | 85743377  | TSS1500                   | <i>BCL10</i>        | 4.704±0.393  | 5.023±0.31   | 2.06E-04 |
| cg06833562 | 1 | 86174060  | GeneBody/5'UTR/1st exon   | <i>ZNHIT6</i>       | -4.969±0.543 | -5.453±0.557 | 1.01E-04 |
| cg19976011 | 1 | 86380779  | GeneBody/1st exon         | <i>HS2ST1</i>       | -5.462±0.531 | -5.826±0.408 | 1.24E-03 |
| cg14540297 | 1 | 87597473  | TSS200                    | <i>LOC339524</i>    | -3.785±0.251 | -3.995±0.367 | 6.67E-04 |
| cg02558133 | 1 | 89150338  | GeneBody/1st intron       | <i>PKN2</i>         | -5.776±0.584 | -6.205±0.592 | 9.37E-04 |
| cg04270788 | 1 | 89356964  | GeneBody/1st intron       | <i>GTF2B</i>        | -4.555±0.334 | -4.978±0.525 | 2.52E-06 |
| cg02705666 | 1 | 89357418  | TSS200                    | <i>GTF2B</i>        | -4.793±0.543 | -5.302±0.528 | 4.68E-05 |
| cg05946081 | 1 | 89458035  | GeneBody/5'UTR/1st intron | <i>CCBL2</i>        | -5.161±0.636 | -5.665±0.564 | 3.25E-04 |
| cg22074858 | 1 | 89488430  | GeneBody/5'UTR/1st exon   | <i>GBP3</i>         | -2.52±0.394  | -2.806±0.388 | 1.02E-03 |
| cg13406950 | 1 | 89530664  | GeneBody/5'UTR/1st intron | <i>GBP1</i>         | -2.334±0.429 | -2.626±0.46  | 2.21E-03 |
| cg17740305 | 1 | 89738358  | GeneBody/5'UTR/1st exon   | <i>GBP5</i>         | 1.65±0.158   | 1.788±0.261  | 7.00E-04 |
| cg09099022 | 1 | 90024622  | GeneBody/5'UTR/1st intron | <i>LRRC8B</i>       | 3.415±0.167  | 3.599±0.289  | 4.29E-05 |
| cg21401794 | 1 | 90099060  | GeneBody/5'UTR/1st intron | <i>LRRC8C</i>       | -5.423±0.503 | -5.836±0.461 | 2.21E-04 |
| cg11208880 | 1 | 90287278  | TSS1500                   | <i>LRRC8D</i>       | -5.332±0.335 | -5.739±0.527 | 5.22E-06 |
| cg26783856 | 1 | 90287523  | GeneBody/5'UTR/1st exon   | <i>LRRC8D</i>       | -3.079±0.256 | -3.258±0.271 | 1.71E-03 |
| cg06384463 | 1 | 91182708  | GeneBody/1st exon         | <i>BARHL2</i>       | -4.143±0.284 | -4.552±0.49  | 5.09E-07 |
| cg03863149 | 1 | 91487516  | GeneBody/5'UTR/1st intron | <i>ZNFB44</i>       | -4.96±0.531  | -5.542±0.573 | 5.64E-06 |
| cg08552999 | 1 | 91487806  | GeneBody/5'UTR/1st exon   | <i>ZNFB44</i>       | -4.315±0.445 | -4.577±0.393 | 5.52E-03 |
| cg13599025 | 1 | 91966361  | TSS200                    | <i>CDC7</i>         | -4.307±0.377 | -4.635±0.642 | 8.64E-04 |
| cg22622495 | 1 | 91966418  | GeneBody/5'UTR/1st exon   | <i>CDC7</i>         | -5.166±0.694 | -5.923±0.66  | 4.60E-06 |
| cg27016863 | 1 | 91966490  | GeneBody/5'UTR/1st exon   | <i>CDC7</i>         | -4.719±0.388 | -5.153±0.546 | 1.10E-05 |
| cg05027081 | 1 | 91966616  | TSS200                    | <i>CDC7</i>         | -5.149±0.562 | -5.632±0.682 | 2.51E-04 |
| cg16382382 | 1 | 92351047  | GeneBody/5'UTR/1st intron | <i>TGFBF3</i>       | -5.908±0.602 | -6.489±0.679 | 4.34E-05 |
| cg26580095 | 1 | 92545650  | TSS1500                   | <i>BTBD8</i>        | -0.957±0.193 | -1.101±0.264 | 1.75E-03 |
| cg21024391 | 1 | 92764898  | TSS1500                   | <i>GLMN</i>         | -4.708±0.416 | -5.043±0.479 | 4.75E-04 |
| cg22341104 | 1 | 92952261  | GeneBody/5'UTR/1st intron | <i>GFI1</i>         | -3.961±0.544 | -4.335±0.538 | 1.75E-03 |
| cg07054788 | 1 | 93297504  | TSS200                    | <i>RPL5</i>         | -4.737±0.411 | -5.012±0.471 | 3.02E-03 |
| cg26054395 | 1 | 93545008  | GeneBody/5'UTR/1st exon   | <i>MTF2</i>         | -5.013±0.51  | -5.325±0.668 | 8.47E-03 |
| cg07387450 | 1 | 93646168  | GeneBody/1st exon         | <i>TMED5</i>        | -5.646±0.647 | -6.126±0.561 | 6.54E-04 |
| cg02421543 | 1 | 93810826  | GeneBody/1st intron       | <i>LOC100131564</i> | -2.83±0.408  | -3.134±0.418 | 8.35E-04 |
| cg05684015 | 1 | 93811877  | GeneBody/5'UTR/1st exon   | <i>DR1</i>          | -5.129±0.496 | -5.456±0.473 | 2.43E-03 |
| cg18060199 | 1 | 94146495  | GeneBody/5'UTR/1st intron | <i>BCAR3</i>        | -3.69±0.304  | -3.912±0.417 | 2.12E-03 |
| cg16833230 | 1 | 94344337  | GeneBody/1st intron       | <i>DNTTIP2</i>      | -4.884±0.365 | -5.222±0.436 | 9.38E-05 |
| cg22807700 | 1 | 94345672  | TSS1500                   | <i>DNTTIP2</i>      | 1.558±0.281  | 1.39±0.327   | 7.79E-03 |
| cg24215727 | 1 | 94883469  | TSS1500                   | <i>ABCD3</i>        | -4.485±0.44  | -4.766±0.391 | 2.90E-03 |
| cg09869791 | 1 | 94884541  | GeneBody/1st intron       | <i>ABCD3</i>        | -4.02±0.422  | -4.286±0.448 | 4.31E-03 |
| cg22424108 | 1 | 95285531  | TSS1500                   | <i>SLC44A3</i>      | -2.437±0.26  | -2.625±0.306 | 1.54E-03 |
| cg02718725 | 1 | 95392925  | TSS200                    | <i>CNN3</i>         | -3.725±0.473 | -4.226±0.546 | 1.16E-05 |
| cg08721347 | 1 | 95538652  | TSS200                    | <i>ALG14</i>        | -4.731±0.419 | -5.029±0.523 | 2.13E-03 |
| cg04185893 | 1 | 97187305  | GeneBody/5'UTR/1st exon   | <i>PTBP2</i>        | -5.387±0.555 | -6.003±0.578 | 4.14E-06 |
| cg08462292 | 1 | 97188168  | GeneBody/1st intron       | <i>PTBP2</i>        | -4.921±0.427 | -5.25±0.524  | 9.00E-04 |
| cg06990379 | 1 | 98386209  | GeneBody/1st intron       | <i>DPYD</i>         | -5.684±0.631 | -6.155±0.527 | 5.83E-04 |
| cg06426831 | 1 | 100435258 | TSS200                    | <i>SLC35A3</i>      | -3.49±0.333  | -3.724±0.411 | 2.31E-03 |
| cg16514995 | 1 | 100597460 | GeneBody/1st intron       | <i>SASS6</i>        | 2.747±0.269  | 2.964±0.248  | 2.78E-04 |
| cg23106864 | 1 | 100598378 | GeneBody/5'UTR/1st exon   | <i>SASS6</i>        | -4.828±0.305 | -4.998±0.28  | 8.94E-03 |
| cg23062876 | 1 | 100715467 | TSS200                    | <i>DBT</i>          | -4.105±0.53  | -4.476±0.476 | 1.24E-03 |
| cg14813406 | 1 | 100817041 | TSS1500                   | <i>CDC14A</i>       | -4.799±0.344 | -5.017±0.487 | 7.91E-03 |
| cg07739803 | 1 | 101361235 | TSS1500                   | <i>SLC30A7</i>      | -5.639±0.414 | -5.912±0.337 | 1.88E-03 |
| cg05612904 | 1 | 101491636 | TSS1500                   | <i>DPH5</i>         | -5.077±0.361 | -5.353±0.33  | 5.11E-04 |
| cg20166532 | 1 | 101702782 | GeneBody/5'UTR/1st intron | <i>S1PR1</i>        | -3.878±0.203 | -4.04±0.236  | 5.29E-04 |
| cg12884406 | 1 | 103573989 | GeneBody/5'UTR/1st exon   | <i>COL11A1</i>      | -2.003±0.17  | -2.145±0.282 | 1.11E-03 |
| cg26256793 | 1 | 103574469 | TSS1500                   | <i>COL11A1</i>      | -2.85±0.336  | -3.075±0.464 | 4.83E-03 |
| cg13908518 | 1 | 104096517 | TSS1500                   | <i>AMY2B</i>        | 2.957±0.264  | 3.162±0.248  | 4.69E-04 |
| cg19918758 | 1 | 108508113 | TSS1500                   | <i>VAV3</i>         | -5.426±0.57  | -5.871±0.521 | 3.98E-04 |
| cg08149333 | 1 | 108742407 | GeneBody/1st intron       | <i>SLC25A24</i>     | -6.09±0.52   | -6.393±0.498 | 7.00E-03 |
| cg22949637 | 1 | 109234813 | TSS200                    | <i>PRPF38B</i>      | -4.677±0.293 | -5.073±0.429 | 5.85E-07 |

|            |   |           |                           |                   |              |              |          |
|------------|---|-----------|---------------------------|-------------------|--------------|--------------|----------|
| cg00712898 | 1 | 109235208 | GeneBody/1st exon         | <i>PRPF38B</i>    | -5.669±0.507 | -6.158±0.657 | 6.93E-05 |
| cg26357241 | 1 | 109289876 | GeneBody/1st intron       | <i>STXBP3</i>     | -3.865±0.399 | -4.241±0.491 | 8.08E-05 |
| cg01969748 | 1 | 109420034 | GeneBody/5'UTR/1st intron | <i>GPSM2</i>      | -5.732±0.6   | -6.213±0.58  | 3.34E-04 |
| cg22063056 | 1 | 109505929 | GeneBody/5'UTR/1st intron | <i>CLCC1</i>      | -5.172±0.482 | -5.586±0.631 | 3.31E-04 |
| cg15991288 | 1 | 109584447 | GeneBody/5'UTR/1st intron | <i>WDR47</i>      | -5.133±0.385 | -5.394±0.525 | 4.26E-03 |
| cg26045220 | 1 | 109656325 | GeneBody/5'UTR/1st exon   | <i>C1orf194</i>   | -4.577±0.296 | -4.924±0.385 | 3.62E-06 |
| cg16345880 | 1 | 109756737 | GeneBody/1st exon         | <i>SARS</i>       | -3.618±0.171 | -3.767±0.308 | 1.09E-03 |
| cg27014642 | 1 | 109791839 | TSS1500                   | <i>CELSR2</i>     | -4.421±0.388 | -4.768±0.455 | 1.38E-04 |
| cg27339143 | 1 | 109825518 | GeneBody/5'UTR/1st intron | <i>PSRC1</i>      | -4.072±0.3   | -4.326±0.453 | 6.87E-04 |
| cg06752594 | 1 | 109825964 | TSS200                    | <i>PSRC1</i>      | -5.899±0.5   | -6.258±0.51  | 1.20E-03 |
| cg10087399 | 1 | 109940029 | GeneBody/1st intron       | <i>SORT1</i>      | -3.72±0.473  | -4.063±0.459 | 1.00E-03 |
| cg23637943 | 1 | 109969159 | TSS200                    | <i>PSMA5</i>      | -4.825±0.311 | -4.999±0.309 | 9.80E-03 |
| cg11286163 | 1 | 109969161 | TSS200                    | <i>PSMA5</i>      | -5.321±0.457 | -5.737±0.54  | 1.12E-04 |
| cg00630249 | 1 | 110036889 | GeneBody/1st exon         | <i>CYB561D1</i>   | -5.15±0.285  | -5.343±0.26  | 1.75E-03 |
| cg00521434 | 1 | 110081965 | TSS1500                   | <i>GPR61</i>      | 2.582±0.198  | 2.698±0.238  | 9.80E-03 |
| cg13878641 | 1 | 110090951 | TSS1500                   | <i>GNAI3</i>      | -4.743±0.575 | -5.281±0.602 | 5.53E-05 |
| cg14254419 | 1 | 110162217 | TSS1500                   | <i>AMPD2</i>      | -2.896±0.31  | -3.116±0.443 | 3.32E-03 |
| cg11903880 | 1 | 110197856 | TSS1500                   | <i>GSTM4</i>      | 0.681±0.25   | 0.51±0.306   | 2.97E-03 |
| cg15955341 | 1 | 110198890 | GeneBody/5'UTR/1st exon   | <i>GSTM4</i>      | -5.709±0.394 | -6.034±0.418 | 2.84E-04 |
| cg00515905 | 1 | 110306507 | GeneBody/5'UTR/1st exon   | <i>EPS8L3</i>     | 3.077±0.293  | 3.316±0.313  | 3.33E-04 |
| cg24326142 | 1 | 110453144 | TSS200                    | <i>CSF1</i>       | -4.502±0.604 | -4.937±0.537 | 9.06E-04 |
| cg23089438 | 1 | 110453477 | GeneBody/5'UTR/1st exon   | <i>CSF1</i>       | -3.256±0.169 | -3.448±0.294 | 3.07E-05 |
| cg24346637 | 1 | 110655292 | GeneBody/1st exon         | <i>UBL4B</i>      | 0.851±0.186  | 0.989±0.244  | 1.63E-03 |
| cg03152785 | 1 | 110753723 | GeneBody/5'UTR/1st exon   | <i>KCNC4</i>      | -5.475±0.64  | -6.217±0.603 | 1.77E-06 |
| cg25416363 | 1 | 110881820 | TSS200                    | <i>LOC440600</i>  | -4.328±0.397 | -4.645±0.43  | 4.50E-04 |
| cg20097268 | 1 | 110950612 | TSS200                    | <i>LAMTOR5</i>    | -4.465±0.35  | -4.867±0.477 | 6.00E-06 |
| cg14198172 | 1 | 110950618 | TSS200                    | <i>LAMTOR5</i>    | -2.916±0.203 | -3.052±0.262 | 3.96E-03 |
| cg23874078 | 1 | 111682148 | TSS200                    | <i>CEPT1</i>      | -3.625±0.471 | -4.033±0.603 | 2.73E-04 |
| cg04763192 | 1 | 111889241 | GeneBody/5'UTR/1st exon   | <i>PIFO</i>       | -5.136±0.399 | -5.711±0.557 | 1.20E-07 |
| cg09558502 | 1 | 111970531 | TSS200                    | <i>OVGP1</i>      | -1.29±0.201  | -1.455±0.244 | 4.34E-04 |
| cg11735358 | 1 | 111991797 | GeneBody/5'UTR/1st exon   | <i>WDR77</i>      | -5.788±0.44  | -6.099±0.519 | 1.93E-03 |
| cg27284019 | 1 | 112298042 | TSS200                    | <i>DDX20</i>      | -4.204±0.386 | -4.548±0.506 | 2.09E-04 |
| cg00160914 | 1 | 112299263 | TSS1500                   | <i>FAM212B</i>    | -2.081±0.211 | -2.245±0.348 | 2.43E-03 |
| cg22957381 | 1 | 112532078 | TSS1500                   | <i>KCND3</i>      | -4.25±0.357  | -3.959±0.568 | 1.24E-03 |
| cg10841258 | 1 | 112938518 | TSS1500                   | <i>CTTNBP2NL</i>  | -2.821±0.484 | -2.182±0.653 | 5.68E-07 |
| cg20648108 | 1 | 112939192 | GeneBody/5'UTR/1st intron | <i>CTTNBP2NL</i>  | -4.731±0.392 | -5.027±0.337 | 5.49E-04 |
| cg04057053 | 1 | 113008926 | TSS1500                   | <i>WNT2B</i>      | -5.641±0.487 | -6.132±0.474 | 1.55E-05 |
| cg01183669 | 1 | 113162291 | GeneBody/5'UTR/1st exon   | <i>CAPZA1</i>     | -5.39±0.406  | -5.714±0.44  | 4.52E-04 |
| cg05807768 | 1 | 113162570 | GeneBody/1st intron       | <i>CAPZA1</i>     | -4.685±0.307 | -4.979±0.333 | 4.30E-05 |
| cg04564646 | 1 | 113217655 | GeneBody                  | <i>MOV10</i>      | -5.865±0.627 | -6.309±0.618 | 1.28E-03 |
| cg16743781 | 1 | 113249654 | GeneBody/5'UTR/1st exon   | <i>RHOC</i>       | -5.346±0.428 | -5.817±0.609 | 1.50E-05 |
| cg12687922 | 1 | 113257872 | GeneBody/1st exon         | <i>PPM1J</i>      | -4.496±0.418 | -4.806±0.546 | 1.64E-03 |
| cg04828892 | 1 | 113258366 | TSS1500                   | <i>PPM1J</i>      | -5.624±0.519 | -6.065±0.57  | 2.16E-04 |
| cg08491025 | 1 | 113498799 | TSS200                    | <i>SLC16A1</i>    | -4.84±0.402  | -5.102±0.562 | 6.24E-03 |
| cg21539243 | 1 | 114301432 | GeneBody/5'UTR/1st exon   | <i>PHTF1</i>      | -4.705±0.546 | -5.126±0.547 | 5.59E-04 |
| cg13958304 | 1 | 114354463 | GeneBody/1st exon         | <i>RSBN1</i>      | -5.078±0.513 | -5.372±0.411 | 6.19E-03 |
| cg23078294 | 1 | 114355137 | TSS200                    | <i>RSBN1</i>      | -5.489±0.456 | -5.772±0.458 | 4.54E-03 |
| cg23933345 | 1 | 114447334 | GeneBody/1st exon         | <i>AP4B1</i>      | -4.441±0.337 | -4.826±0.46  | 6.72E-06 |
| cg01883521 | 1 | 114471974 | TSS200                    | <i>HIPK1</i>      | -4.988±0.344 | -5.199±0.286 | 3.65E-03 |
| cg21943652 | 1 | 114472049 | GeneBody/5'UTR/1st exon   | <i>HIPK1</i>      | -5.548±0.326 | -5.82±0.54   | 1.18E-03 |
| cg05368341 | 1 | 114696465 | GeneBody/5'UTR/1st exon   | <i>SYT6</i>       | -4.211±0.367 | -4.482±0.587 | 3.36E-03 |
| cg22646710 | 1 | 114696798 | TSS1500                   | <i>SYT6</i>       | -4.142±0.32  | -4.394±0.432 | 9.65E-04 |
| cg21666217 | 1 | 115053421 | GeneBody/1st exon         | <i>TRIM33</i>     | -5.751±0.554 | -6.206±0.668 | 4.32E-04 |
| cg20932765 | 1 | 115054143 | TSS1500                   | <i>TRIM33</i>     | -3.72±0.391  | -4.153±0.585 | 1.75E-05 |
| cg19234509 | 1 | 115124245 | GeneBody/5'UTR/1st exon   | <i>BCAS2</i>      | -4.993±0.678 | -5.77±0.69   | 2.49E-06 |
| cg00209951 | 1 | 115212834 | TSS200                    | <i>DENND2C</i>    | -2.955±0.303 | -3.313±0.411 | 3.57E-06 |
| cg07068998 | 1 | 115259668 | TSS200                    | <i>NRAS</i>       | -3.917±0.283 | -4.134±0.387 | 1.33E-03 |
| cg08166982 | 1 | 115300440 | GeneBody/5'UTR/1st intron | <i>CSDE1</i>      | -4.206±0.25  | -4.412±0.368 | 8.27E-04 |
| cg10125119 | 1 | 115300850 | TSS200                    | <i>CSDE1</i>      | -3.578±0.632 | -4.077±0.616 | 3.95E-04 |
| cg19432434 | 1 | 115323269 | GeneBody/1st exon         | <i>SIKE1</i>      | -5.156±0.505 | -5.441±0.405 | 7.13E-03 |
| cg08339208 | 1 | 115323327 | TSS200                    | <i>SIKE1</i>      | -5.387±0.378 | -5.769±0.512 | 4.45E-05 |
| cg08157638 | 1 | 116194194 | GeneBody                  | <i>VANGL1</i>     | 2.327±0.339  | 2.56±0.277   | 1.32E-03 |
| cg14841875 | 1 | 116916411 | TSS200                    | <i>ATP1A1</i>     | -3.6±0.317   | -3.843±0.682 | 8.43E-03 |
| cg21039631 | 1 | 117112854 | GeneBody/1st intron       | <i>CD58</i>       | -3.605±0.28  | -3.941±0.452 | 7.22E-06 |
| cg12205047 | 1 | 117209954 | TSS1500                   | <i>IGSF3</i>      | -4.812±0.445 | -5.107±0.376 | 1.90E-03 |
| cg16719404 | 1 | 117296242 | TSS1500                   | <i>CD2</i>        | -0.558±0.195 | -0.705±0.34  | 3.83E-03 |
| cg08920071 | 1 | 117544781 | GeneBody/1st intron       | <i>CD101</i>      | 1.313±0.336  | 1.071±0.453  | 2.32E-03 |
| cg12641660 | 1 | 117602129 | TSS1500                   | <i>TTF2</i>       | -4.913±0.551 | -5.373±0.6   | 2.64E-04 |
| cg19120746 | 1 | 117664515 | TSS200                    | <i>TRIM45</i>     | -4.024±0.35  | -4.242±0.285 | 3.27E-03 |
| cg23828212 | 1 | 117910371 | GeneBody/5'UTR/1st exon   | <i>MAN1A2</i>     | -5.631±0.537 | -5.994±0.463 | 1.61E-03 |
| cg14545899 | 1 | 118149019 | GeneBody/5'UTR/1st intron | <i>FAM46C</i>     | -5.296±0.451 | -5.758±0.539 | 2.27E-05 |
| cg14915165 | 1 | 118471929 | GeneBody/5'UTR/1st intron | <i>GDAP2</i>      | -4.699±0.352 | -4.907±0.29  | 5.04E-03 |
| cg05257479 | 1 | 119683279 | GeneBody/5'UTR/1st exon   | <i>WARS2</i>      | -5.365±0.342 | -5.667±0.369 | 1.28E-04 |
| cg23131777 | 1 | 120438925 | GeneBody/1st exon         | <i>ADAM30</i>     | 0.591±0.249  | 0.752±0.333  | 6.03E-03 |
| cg07518362 | 1 | 120611593 | GeneBody/1st intron       | <i>NOTCH2</i>     | -5.259±0.304 | -5.581±0.462 | 3.70E-05 |
| cg02963198 | 1 | 145209830 | GeneBody/5'UTR/1st intron | <i>NOTCH2NL</i>   | -5.021±0.33  | -5.27±0.479  | 1.94E-03 |
| cg19389852 | 1 | 145439013 | GeneBody/1st exon         | <i>TXNIP</i>      | -2.689±0.688 | -3.257±0.636 | 2.13E-04 |
| cg19413110 | 1 | 145470355 | GeneBody/5'UTR/1st exon   | <i>POLR3GL</i>    | -3.948±0.355 | -3.568±0.399 | 9.23E-06 |
| cg21332946 | 1 | 145476871 | TSS1500                   | <i>LIX1L</i>      | -5.623±0.635 | -6.008±0.643 | 5.48E-03 |
| cg03418289 | 1 | 145477137 | GeneBody/5'UTR/1st exon   | <i>LIX1L</i>      | -5.771±0.543 | -6.224±0.54  | 2.19E-04 |
| cg15611923 | 1 | 145507416 | TSS200                    | <i>RBMB8A</i>     | -4.129±0.268 | -4.324±0.506 | 7.51E-03 |
| cg06804431 | 1 | 145516254 | GeneBody/5'UTR/1st exon   | <i>PEX11B</i>     | -4.682±0.623 | -5.156±0.629 | 6.51E-04 |
| cg17938146 | 1 | 145523592 | TSS1500                   | <i>ITGA10</i>     | 3.173±0.209  | 3.323±0.235  | 1.50E-03 |
| cg10823926 | 1 | 145549189 | TSS200                    | <i>ANKRD35</i>    | -4.922±0.414 | -5.211±0.509 | 2.44E-03 |
| cg11246695 | 1 | 145576023 | GeneBody/5'UTR/1st exon   | <i>PIAS3</i>      | -5.803±0.558 | -6.404±0.634 | 8.75E-06 |
| cg05795157 | 1 | 145576107 | GeneBody/1st intron       | <i>PIAS3</i>      | -4.222±0.375 | -4.631±0.638 | 4.57E-05 |
| cg08614201 | 1 | 145715134 | GeneBody/1st intron       | <i>CD160</i>      | 2.342±0.215  | 2.206±0.297  | 7.91E-03 |
| cg14367344 | 1 | 146644336 | TSS200                    | <i>PRKAB2</i>     | -5.67±0.493  | -5.977±0.423 | 3.39E-03 |
| cg16525692 | 1 | 146715099 | GeneBody/5'UTR/1st intron | <i>CHD1L</i>      | -4.32±0.448  | -4.593±0.394 | 4.23E-03 |
| cg08307963 | 1 | 147245485 | TSS200                    | <i>GJA5</i>       | -3.243±0.26  | -3.495±0.381 | 1.07E-04 |
| cg10735116 | 1 | 147400532 | GeneBody/5'UTR/1st exon   | <i>GPR89B</i>     | -5.484±0.519 | -6.013±0.566 | 1.75E-05 |
| cg09588210 | 1 | 147932603 | TSS1500                   | <i>FLJ39739</i>   | -1.97±0.155  | -2.184±0.25  | 6.59E-07 |
| cg13536448 | 1 | 149814453 | TSS200                    | <i>HIST2H2AA4</i> | -3.902±0.942 | -4.429±0.782 | 7.78E-03 |
| cg09866173 | 1 | 149832789 | TSS200                    | <i>HIST2H4B</i>   | -5.538±0.683 | -6.112±0.574 | 1.45E-04 |
| cg08934443 | 1 | 149859898 | TSS1500                   | <i>HIST2H2AB</i>  | -3.225±0.387 | -3.525±0.549 | 1.33E-03 |

|            |   |           |                           |                     |              |              |          |
|------------|---|-----------|---------------------------|---------------------|--------------|--------------|----------|
| cg07807709 | 1 | 149860026 | TSS1500                   | <i>HIST2H2AB</i>    | -3.483±0.242 | -3.618±0.228 | 9.55E-03 |
| cg09980622 | 1 | 149871503 | GeneBody/5'UTR/1st intron | <i>BOLA1</i>        | -5.336±0.522 | -5.693±0.616 | 2.62E-03 |
| cg12072973 | 1 | 150121727 | TSS1500                   | <i>PLEKHO1</i>      | -5.407±0.557 | -6.002±0.562 | 7.20E-06 |
| cg00095674 | 1 | 150122654 | GeneBody/1st intron       | <i>PLEKHO1</i>      | -2.988±0.324 | -2.591±0.427 | 1.78E-06 |
| cg02937060 | 1 | 150207515 | TSS1500                   | <i>ANP32E</i>       | -3.507±0.33  | -3.26±0.357  | 8.90E-04 |
| cg21715963 | 1 | 150254838 | TSS1500                   | <i>C1orf51</i>      | -4.244±0.357 | -4.545±0.44  | 3.34E-04 |
| cg13454184 | 1 | 150459676 | TSS200                    | <i>TARS2</i>        | -4.248±0.574 | -4.604±0.578 | 4.47E-03 |
| cg08749122 | 1 | 150459996 | GeneBody/1st intron       | <i>TARS2</i>        | -4.581±0.548 | -4.962±0.535 | 1.56E-03 |
| cg11512771 | 1 | 150479487 | TSS1500                   | <i>ECM1</i>         | 3.263±0.257  | 3.114±0.254  | 7.72E-03 |
| cg09622957 | 1 | 150521190 | TSS1500                   | <i>ADAMTSL4</i>     | -3.948±0.278 | -4.185±0.294 | 1.86E-04 |
| cg01139966 | 1 | 150669796 | TSS200                    | <i>GOLPH3L</i>      | -4.485±0.597 | -4.89±0.624  | 2.18E-03 |
| cg12082615 | 1 | 150898693 | TSS200                    | <i>SETDB1</i>       | -4.071±0.243 | -4.31±0.503  | 6.30E-04 |
| cg17918089 | 1 | 150899251 | GeneBody/5'UTR/1st intron | <i>SETDB1</i>       | -4.622±0.52  | -4.979±0.583 | 2.26E-03 |
| cg04082985 | 1 | 150946396 | GeneBody/5'UTR/1st intron | <i>CERS2</i>        | -4.076±0.342 | -4.281±0.442 | 9.73E-03 |
| cg19744131 | 1 | 150980805 | GeneBody/5'UTR/1st exon   | <i>FAM63A</i>       | -4.753±0.412 | -5.109±0.579 | 4.03E-04 |
| cg04275985 | 1 | 150981091 | GeneBody/5'UTR/1st exon   | <i>PRUNE</i>        | -4.94±0.488  | -5.201±0.318 | 8.86E-03 |
| cg26288160 | 1 | 151020733 | GeneBody/1st exon         | <i>C1orf56</i>      | -4.563±0.337 | -4.875±0.423 | 1.07E-04 |
| cg07139440 | 1 | 151030981 | GeneBody/5'UTR/1st intron | <i>CDC42SE1</i>     | -3.581±0.344 | -3.836±0.398 | 1.17E-03 |
| cg17002259 | 1 | 151032260 | GeneBody/5'UTR/1st exon   | <i>MLLT11</i>       | -5.059±0.368 | -5.389±0.4   | 1.06E-04 |
| cg10124491 | 1 | 151042967 | TSS200                    | <i>GABPB2</i>       | -4.622±0.538 | -5.136±0.624 | 5.47E-05 |
| cg11411707 | 1 | 151043197 | GeneBody/5'UTR/1st exon   | <i>GABPB2</i>       | -4.835±0.316 | -5.059±0.336 | 1.52E-03 |
| cg01958916 | 1 | 151119525 | TSS1500                   | <i>SEMA6C</i>       | -4.958±0.442 | -5.242±0.39  | 2.62E-03 |
| cg01281797 | 1 | 151138249 | GeneBody/5'UTR/1st exon   | <i>LYSMD1</i>       | -3.414±0.276 | -3.126±0.307 | 1.32E-05 |
| cg15827295 | 1 | 151138583 | GeneBody/5'UTR/1st exon   | <i>SCNM1</i>        | -4.969±0.499 | -5.524±0.509 | 3.92E-06 |
| cg20930618 | 1 | 151162157 | GeneBody/1st intron       | <i>VPS72</i>        | -4.602±0.433 | -5.007±0.673 | 2.35E-04 |
| cg07634204 | 1 | 151162707 | TSS200                    | <i>VPS72</i>        | -3.619±0.675 | -4.05±0.635  | 3.14E-03 |
| cg20854748 | 1 | 151170914 | TSS200                    | <i>PIP5K1A</i>      | -4.691±0.26  | -4.873±0.249 | 1.40E-03 |
| cg07668036 | 1 | 151227536 | GeneBody/1st intron       | <i>PSMD4</i>        | -4.66±0.387  | -4.952±0.403 | 7.51E-04 |
| cg08927489 | 1 | 151254500 | TSS1500                   | <i>ZNF687</i>       | -4.525±0.327 | -4.828±0.535 | 3.45E-04 |
| cg15691841 | 1 | 151255071 | GeneBody/5'UTR/1st intron | <i>ZNF687</i>       | -4.988±0.32  | -5.22±0.402  | 1.76E-03 |
| cg06585027 | 1 | 151300083 | GeneBody/5'UTR/1st exon   | <i>PI4KB</i>        | -5.273±0.521 | -5.607±0.48  | 2.92E-03 |
| cg22736107 | 1 | 151371972 | TSS200                    | <i>PSMB4</i>        | -4.823±0.418 | -5.18±0.562  | 3.89E-04 |
| cg20077393 | 1 | 151483425 | TSS1500                   | <i>CGN</i>          | -4.686±0.372 | -4.956±0.452 | 1.65E-03 |
| cg12729048 | 1 | 151513198 | GeneBody/1st intron       | <i>TUFT1</i>        | -4.557±0.366 | -4.809±0.391 | 1.93E-03 |
| cg00368415 | 1 | 151584398 | TSS1500                   | <i>SNX27</i>        | -5.164±0.374 | -5.614±0.549 | 4.14E-06 |
| cg14269514 | 1 | 151736130 | TSS200                    | <i>MRPL9</i>        | -4.689±0.316 | -4.993±0.441 | 9.66E-05 |
| cg25112191 | 1 | 151804260 | GeneBody/5'UTR/1st exon   | <i>RORC</i>         | 0.158±0.129  | 0.238±0.164  | 7.53E-03 |
| cg03940966 | 1 | 151881785 | GeneBody/1st intron       | <i>THEM4</i>        | -4.97±0.281  | -5.177±0.348 | 1.47E-03 |
| cg12052258 | 1 | 152009284 | GeneBody/1st intron       | <i>S100A11</i>      | -4.443±0.395 | -4.727±0.493 | 1.86E-03 |
| cg25098401 | 1 | 152658407 | TSS200                    | <i>LCE2B</i>        | 0.658±0.31   | 0.378±0.312  | 8.00E-05 |
| cg13697387 | 1 | 152670843 | GeneBody/5'UTR/1st exon   | <i>LCE2A</i>        | -2.412±0.214 | -2.561±0.305 | 3.79E-03 |
| cg27626424 | 1 | 153232348 | GeneBody/5'UTR/1st intron | <i>LOR</i>          | 3.063±0.219  | 3.286±0.301  | 4.27E-05 |
| cg19836808 | 1 | 153432916 | GeneBody/5'UTR/1st intron | <i>S100A7</i>       | -2.57±0.322  | -2.849±0.353 | 1.77E-04 |
| cg09413557 | 1 | 153508713 | GeneBody/5'UTR/1st exon   | <i>S100A6</i>       | -5.647±0.468 | -5.969±0.525 | 2.21E-03 |
| cg00419564 | 1 | 153508860 | TSS200                    | <i>S100A6</i>       | -4.992±0.483 | -5.381±0.486 | 3.43E-04 |
| cg26894575 | 1 | 153518054 | GeneBody/5'UTR/1st intron | <i>S100A4</i>       | -1.618±0.328 | -1.874±0.372 | 6.54E-04 |
| cg25433648 | 1 | 153588782 | GeneBody/5'UTR/1st exon   | <i>S100A14</i>      | 1.268±0.217  | 1.455±0.295  | 3.69E-04 |
| cg14467840 | 1 | 153600972 | GeneBody/5'UTR/1st exon   | <i>S100A1</i>       | 2.912±0.177  | 3.088±0.317  | 2.22E-04 |
| cg19736898 | 1 | 153606329 | TSS200                    | <i>CHTOP</i>        | -4.806±0.437 | -5.085±0.571 | 6.12E-03 |
| cg13216303 | 1 | 153643044 | GeneBody/1st intron       | <i>ILF2</i>         | -5.241±0.333 | -5.473±0.307 | 1.35E-03 |
| cg07688613 | 1 | 153700021 | TSS1500                   | <i>INTS3</i>        | -3.802±0.259 | -4.023±0.388 | 6.17E-04 |
| cg15371509 | 1 | 153700650 | GeneBody/5'UTR/1st exon   | <i>INTS3</i>        | -4.482±0.555 | -4.826±0.512 | 4.02E-03 |
| cg16029636 | 1 | 153940420 | GeneBody/5'UTR/1st exon   | <i>CREB3L4</i>      | -4.631±0.353 | -4.888±0.336 | 9.25E-04 |
| cg19490266 | 1 | 153949898 | GeneBody/5'UTR/1st exon   | <i>JTB</i>          | -5.048±0.324 | -5.581±0.438 | 7.61E-09 |
| cg16915794 | 1 | 153959086 | TSS1500                   | <i>RAB13</i>        | -4.39±0.415  | -4.811±0.601 | 5.38E-05 |
| cg20859470 | 1 | 153963593 | GeneBody                  | <i>RPS27</i>        | -4.264±0.329 | -4.47±0.316  | 3.87E-03 |
| cg12402495 | 1 | 154192844 | GeneBody/5'UTR/1st intron | <i>UBAP2L</i>       | -5.611±0.424 | -5.96±0.587  | 6.66E-04 |
| cg01628253 | 1 | 154244960 | TSS200                    | <i>HAX1</i>         | -4.612±0.442 | -4.879±0.466 | 5.95E-03 |
| cg17572791 | 1 | 154245185 | GeneBody/5'UTR/1st exon   | <i>HAX1</i>         | -4.398±0.47  | -4.752±0.669 | 1.81E-03 |
| cg08008562 | 1 | 154530682 | GeneBody/1st intron       | <i>UBE2Q1</i>       | -4.709±0.575 | -5.188±0.531 | 1.89E-04 |
| cg09311052 | 1 | 154531418 | TSS1500                   | <i>UBE2Q1</i>       | -5.74±0.519  | -6.174±0.567 | 2.63E-04 |
| cg04361527 | 1 | 154909836 | TSS1500                   | <i>PMVK</i>         | -4.72±0.402  | -4.968±0.505 | 7.38E-03 |
| cg25816468 | 1 | 154928408 | GeneBody/5'UTR/1st intron | <i>PBXIP1</i>       | -4.822±0.356 | -5.285±0.459 | 6.24E-07 |
| cg01277844 | 1 | 154934734 | TSS1500                   | <i>PYGO2</i>        | -4.442±0.41  | -4.727±0.321 | 1.12E-03 |
| cg00915289 | 1 | 154946946 | GeneBody/5'UTR/1st exon   | <i>SHC1</i>         | -5.424±0.357 | -5.638±0.338 | 5.49E-03 |
| cg06418219 | 1 | 154948305 | GeneBody/1st intron       | <i>CKS1B</i>        | -4.224±0.458 | -4.52±0.678  | 7.77E-03 |
| cg17608500 | 1 | 154955711 | TSS200                    | <i>FLAD1</i>        | -4.854±0.324 | -5.082±0.302 | 1.26E-03 |
| cg01366407 | 1 | 154955991 | GeneBody/5'UTR/1st exon   | <i>FLAD1</i>        | -4.613±0.373 | -4.924±0.333 | 1.77E-04 |
| cg23154272 | 1 | 154966068 | GeneBody/5'UTR/1st exon   | <i>LENEP</i>        | 0.831±0.178  | 0.972±0.213  | 5.92E-04 |
| cg12530270 | 1 | 155005172 | GeneBody                  | <i>DCST2</i>        | 3.203±0.246  | 3.358±0.264  | 4.30E-03 |
| cg15694180 | 1 | 155023435 | GeneBody/1st exon         | <i>LOC100505666</i> | -5.447±0.517 | -5.779±0.639 | 5.13E-03 |
| cg17582777 | 1 | 155050100 | TSS1500                   | <i>EFNA3</i>        | 1.489±0.18   | 1.675±0.235  | 2.65E-05 |
| cg05813084 | 1 | 155051569 | GeneBody/1st intron       | <i>EFNA3</i>        | -4.523±0.429 | -4.933±0.416 | 3.53E-05 |
| cg08250444 | 1 | 155100078 | TSS1500                   | <i>EFNA1</i>        | -5.429±0.501 | -5.852±0.473 | 1.70E-04 |
| cg03231024 | 1 | 155100501 | GeneBody/1st exon         | <i>EFNA1</i>        | -4.342±0.265 | -4.506±0.34  | 7.59E-03 |
| cg23916948 | 1 | 155108399 | GeneBody/1st exon         | <i>SLC50A1</i>      | -5.655±0.544 | -5.969±0.522 | 7.48E-03 |
| cg21038964 | 1 | 155113214 | TSS1500                   | <i>DPM3</i>         | -4.092±0.405 | -4.358±0.454 | 3.40E-03 |
| cg26233468 | 1 | 155145786 | GeneBody/5'UTR/1st exon   | <i>KRTCAP2</i>      | -6.147±0.559 | -6.45±0.459  | 9.66E-03 |
| cg07399355 | 1 | 155163013 | TSS1500                   | <i>MUC1</i>         | -4.016±0.378 | -4.344±0.476 | 2.58E-04 |
| cg06420088 | 1 | 155163590 | TSS1500                   | <i>MUC1</i>         | -3.092±0.254 | -3.346±0.356 | 5.61E-05 |
| cg12543649 | 1 | 155176868 | GeneBody/1st intron       | <i>THBS3</i>        | -4.591±0.355 | -4.862±0.413 | 8.89E-04 |
| cg06237414 | 1 | 155178670 | GeneBody/1st exon         | <i>MTX1</i>         | -4.359±0.352 | -4.672±0.422 | 1.57E-04 |
| cg17319849 | 1 | 155214564 | GeneBody/5'UTR/1st exon   | <i>GBA</i>          | -5.129±0.47  | -5.544±0.501 | 1.28E-04 |
| cg03985657 | 1 | 155225128 | GeneBody/5'UTR/1st exon   | <i>FAM189B</i>      | -5.081±0.439 | -5.544±0.616 | 2.65E-05 |
| cg22939715 | 1 | 155225375 | TSS200                    | <i>FAM189B</i>      | -5.392±0.381 | -5.701±0.375 | 3.10E-04 |
| cg14550101 | 1 | 155247361 | GeneBody/1st exon         | <i>HCN3</i>         | -5.009±0.327 | -5.363±0.601 | 8.28E-05 |
| cg15470750 | 1 | 155278344 | TSS200                    | <i>FDPS</i>         | -3.974±0.408 | -4.237±0.567 | 8.86E-03 |
| cg12489819 | 1 | 155278858 | GeneBody/5'UTR/1st exon   | <i>FDPS</i>         | -4.142±0.367 | -3.891±0.575 | 6.10E-03 |
| cg17038116 | 1 | 155533405 | TSS1500                   | <i>ASH1L</i>        | -3.738±0.477 | -4.215±0.635 | 4.66E-05 |
| cg18528640 | 1 | 155579964 | GeneBody/1st exon         | <i>MSTO1</i>        | -4.235±0.448 | -4.517±0.465 | 4.18E-03 |
| cg15696781 | 1 | 155580397 | GeneBody                  | <i>MSTO2P</i>       | -4.321±0.542 | -4.692±0.67  | 2.95E-03 |
| cg27114086 | 1 | 155658701 | GeneBody/5'UTR/1st intron | <i>YY1AP1</i>       | -4.953±0.371 | -5.291±0.445 | 1.16E-04 |
| cg20969242 | 1 | 155827044 | TSS200                    | <i>GON4L</i>        | -3.945±0.646 | -4.643±0.766 | 9.37E-06 |
| cg05321960 | 1 | 155904084 | GeneBody/1st intron       | <i>KIAA0907</i>     | -3.435±0.685 | -3.845±0.615 | 5.09E-03 |
| cg23320056 | 1 | 155948742 | TSS1500                   | <i>ARHGEF2</i>      | -3.313±0.26  | -3.508±0.263 | 7.51E-04 |

|            |   |           |                           |           |              |              |          |
|------------|---|-----------|---------------------------|-----------|--------------|--------------|----------|
| cg06821274 | 1 | 155990882 | TSS200                    | SSR2      | -4.494±0.401 | -4.765±0.569 | 4.76E-03 |
| cg16907075 | 1 | 156022875 | GeneBody/1st intron       | UBQLN4    | -3.011±0.489 | -3.308±0.538 | 6.38E-03 |
| cg24502084 | 1 | 156024674 | GeneBody/5'UTR/1st exon   | LAMTOR2   | -4.383±0.281 | -4.593±0.505 | 4.81E-03 |
| cg04317543 | 1 | 156084516 | GeneBody/5'UTR/1st exon   | LMNA      | -5.304±0.456 | -5.79±0.608  | 1.83E-05 |
| cg14171523 | 1 | 156163644 | TSS200                    | SLC25A44  | -5.124±0.41  | -5.47±0.386  | 1.38E-04 |
| cg27165888 | 1 | 156182956 | GeneBody/1st exon         | PMF1      | -4.572±0.31  | -4.79±0.282  | 1.22E-03 |
| cg01646665 | 1 | 156251436 | GeneBody/1st intron       | SMG5      | -1.833±0.299 | -2.018±0.313 | 5.02E-03 |
| cg08763433 | 1 | 156252438 | GeneBody/1st exon         | SMG5      | -6.327±0.527 | -6.655±0.435 | 3.32E-03 |
| cg22377142 | 1 | 156265275 | GeneBody/1st intron       | C1orf85   | -3.931±0.561 | -4.507±0.527 | 1.13E-05 |
| cg18667426 | 1 | 156265552 | TSS200                    | C1orf85   | -4.279±0.352 | -4.655±0.487 | 2.05E-05 |
| cg08156349 | 1 | 156470327 | GeneBody/5'UTR/1st exon   | MEF2D     | -5.177±0.444 | -5.513±0.417 | 5.90E-04 |
| cg03989569 | 1 | 156471288 | TSS1500                   | MEF2D     | -5.26±0.475  | -5.66±0.441  | 1.64E-04 |
| cg12124478 | 1 | 156542480 | TSS200                    | IQGAP3    | -3.946±0.421 | -4.195±0.48  | 8.38E-03 |
| cg09822001 | 1 | 156561334 | TSS1500                   | APOA1BP   | -4.225±0.369 | -4.558±0.513 | 2.23E-04 |
| cg23881601 | 1 | 156698494 | GeneBody/5'UTR/1st exon   | RRNAD1    | -5.741±0.406 | -6.001±0.529 | 5.91E-03 |
| cg25371088 | 1 | 156710915 | GeneBody/5'UTR/1st exon   | MRPL24    | -3.807±0.314 | -3.993±0.363 | 8.28E-03 |
| cg25503559 | 1 | 156710998 | TSS200                    | MRPL24    | -4.631±0.298 | -4.804±0.265 | 6.31E-03 |
| cg15503799 | 1 | 156737481 | GeneBody/5'UTR/1st exon   | PRCC      | -4.208±0.222 | -4.382±0.243 | 5.81E-04 |
| cg12995941 | 1 | 156829377 | TSS1500                   | INSRR     | -2.128±0.254 | -1.799±0.334 | 6.94E-07 |
| cg25017304 | 1 | 157015118 | GeneBody/5'UTR/1st exon   | ARHGEF11  | -3.202±0.23  | -3.353±0.322 | 5.68E-03 |
| cg05909475 | 1 | 157108803 | TSS1500                   | ETV3      | -4.627±0.488 | -4.978±0.482 | 1.11E-03 |
| cg11921829 | 1 | 157746930 | TSS200                    | FCRL2     | 0.832±0.335  | 1.042±0.339  | 4.14E-03 |
| cg09340639 | 1 | 157789662 | GeneBody/1st intron       | FCRL1     | -1.345±0.258 | -1.522±0.331 | 3.07E-03 |
| cg13765621 | 1 | 158149228 | TSS1500                   | CD1D      | -1.347±0.26  | -1.501±0.295 | 7.77E-03 |
| cg17399166 | 1 | 158149795 | GeneBody/5'UTR/1st exon   | CD1D      | 2.009±0.309  | 2.194±0.358  | 7.57E-03 |
| cg22730004 | 1 | 158656718 | TSS1500                   | SPTA1     | -0.054±0.279 | -0.226±0.336 | 6.88E-03 |
| cg10544564 | 1 | 159141860 | GeneBody/1st intron       | CADM3     | -4.153±0.456 | -4.582±0.548 | 7.31E-05 |
| cg10663017 | 1 | 159750305 | TSS1500                   | DUSP23    | -3.914±0.442 | -4.239±0.381 | 7.10E-04 |
| cg18084791 | 1 | 159797320 | GeneBody/1st intron       | SLAMF8    | 2.663±0.339  | 2.437±0.413  | 3.50E-03 |
| cg09451092 | 1 | 159869223 | GeneBody/1st intron       | CCDC19    | 2.284±0.21   | 2.494±0.331  | 9.99E-05 |
| cg02849695 | 1 | 159869960 | TSS200                    | CCDC19    | -1.494±0.385 | -1.259±0.391 | 5.19E-03 |
| cg08661227 | 1 | 159895006 | GeneBody/5'UTR/1st intron | TAGLN2    | -5.83±0.546  | -6.467±0.641 | 2.69E-06 |
| cg04197051 | 1 | 160001439 | GeneBody/1st exon         | PIGM      | -5.572±0.436 | -5.95±0.457  | 1.47E-04 |
| cg23004625 | 1 | 160002365 | TSS1500                   | PIGM      | -3.55±0.268  | -3.769±0.332 | 4.88E-04 |
| cg04697119 | 1 | 160068221 | GeneBody/1st exon         | IGSF8     | -3.823±0.227 | -3.973±0.347 | 7.11E-03 |
| cg02032115 | 1 | 160069052 | TSS1500                   | IGSF8     | -4.36±0.308  | -4.59±0.296  | 7.38E-04 |
| cg00327483 | 1 | 160160587 | GeneBody/1st exon         | CASQ1     | 3.736±0.197  | 3.293±0.339  | 2.03E-05 |
| cg07566050 | 1 | 160174755 | TSS1500                   | PEA15     | 2.131±0.211  | 2.258±0.204  | 5.55E-03 |
| cg08284180 | 1 | 160232170 | GeneBody/1st exon         | DCAF8     | -5.767±0.559 | -6.28±0.516  | 5.51E-05 |
| cg12701576 | 1 | 160254608 | GeneBody/1st intron       | PEX19     | -4.876±0.578 | -5.385±0.554 | 1.02E-04 |
| cg14964658 | 1 | 160255030 | TSS200                    | PEX19     | -5.155±0.512 | -5.597±0.514 | 1.44E-04 |
| cg12529228 | 1 | 160336994 | GeneBody/5'UTR/1st exon   | NHLH1     | 2.662±0.21   | 2.858±0.307  | 1.81E-04 |
| cg10671066 | 1 | 160492861 | GeneBody/1st intron       | SLAMF6    | -2.263±0.349 | -2.504±0.384 | 2.07E-03 |
| cg18641937 | 1 | 160924389 | GeneBody/1st intron       | ITLN2     | 2.219±0.229  | 2.398±0.297  | 9.15E-04 |
| cg22585988 | 1 | 161059327 | GeneBody/5'UTR/1st exon   | PVRL4     | 0.597±0.192  | 0.747±0.253  | 9.80E-04 |
| cg13298382 | 1 | 161087635 | TSS1500                   | NIT1      | -4.546±0.429 | -4.927±0.5   | 1.49E-04 |
| cg10053203 | 1 | 161087998 | GeneBody/5'UTR/1st exon   | NIT1      | -4.127±0.194 | -4.259±0.231 | 2.82E-03 |
| cg04991214 | 1 | 161089118 | GeneBody                  | NIT1      | 2.2±0.267    | 2.43±0.292   | 1.85E-04 |
| cg25929421 | 1 | 161102777 | TSS1500                   | DEDD      | -5.091±0.391 | -5.34±0.318  | 2.64E-03 |
| cg00397740 | 1 | 161136321 | GeneBody/5'UTR/1st exon   | PPOX      | -4.065±0.249 | -4.344±0.432 | 3.53E-05 |
| cg03522910 | 1 | 161147597 | GeneBody/5'UTR/1st exon   | B4GALT3   | -4.866±0.312 | -5.065±0.339 | 4.14E-03 |
| cg01053621 | 1 | 161193991 | TSS1500                   | APOA2     | 1.219±0.21   | 1.357±0.241  | 3.36E-03 |
| cg24592207 | 1 | 161195816 | TSS200                    | TOMM40L   | -4.542±0.375 | -4.886±0.448 | 1.03E-04 |
| cg02525396 | 1 | 161195883 | GeneBody/5'UTR/1st exon   | TOMM40L   | -3.051±0.224 | -3.222±0.301 | 1.36E-03 |
| cg25214346 | 1 | 161207966 | GeneBody/5'UTR/1st exon   | NR1I3     | 1.844±0.227  | 2.059±0.274  | 6.75E-05 |
| cg22202141 | 1 | 161520591 | TSS200                    | FCGR3A    | 1.749±0.24   | 1.895±0.247  | 5.41E-03 |
| cg16414945 | 1 | 161719333 | TSS1500                   | DUSP12    | -2.602±0.234 | -2.79±0.296  | 6.12E-04 |
| cg23779106 | 1 | 161719820 | GeneBody/1st exon         | DUSP12    | -5.961±0.567 | -6.374±0.594 | 1.12E-03 |
| cg26591879 | 1 | 161736013 | TSS200                    | ATF6      | -3.245±0.446 | -3.655±0.551 | 1.17E-04 |
| cg07924819 | 1 | 161736104 | GeneBody/5'UTR/1st exon   | ATF6      | -4.614±0.347 | -4.877±0.453 | 1.26E-03 |
| cg20172280 | 1 | 161993542 | GeneBody/5'UTR/1st exon   | OLFML2B   | -4.241±0.358 | -4.52±0.518  | 1.38E-03 |
| cg19130550 | 1 | 161994277 | TSS1500                   | OLFML2B   | -4.172±0.402 | -4.448±0.364 | 1.55E-03 |
| cg19451466 | 1 | 162467441 | TSS200                    | UHMK1     | -4.255±0.3   | -4.483±0.339 | 8.65E-04 |
| cg27409012 | 1 | 162531173 | TSS200                    | UAP1      | -5.543±0.508 | -5.984±0.454 | 1.10E-04 |
| cg16604136 | 1 | 163291493 | GeneBody/5'UTR/1st exon   | RGS5      | -5.528±0.656 | -5.928±0.581 | 4.26E-03 |
| cg15778350 | 1 | 163291775 | GeneBody/5'UTR/1st exon   | NUF2      | -4.596±0.416 | -5.012±0.539 | 4.30E-05 |
| cg24489237 | 1 | 164529170 | GeneBody/1st exon         | PBX1      | -3.364±0.245 | -3.559±0.234 | 3.59E-04 |
| cg07686479 | 1 | 165325030 | GeneBody/5'UTR/1st intron | LMX1A     | -3.33±0.306  | -3.609±0.485 | 3.58E-04 |
| cg27477594 | 1 | 165600170 | GeneBody/5'UTR/1st exon   | MGST3     | -4.894±0.337 | -5.281±0.487 | 8.20E-06 |
| cg22165507 | 1 | 165601007 | GeneBody/5'UTR/1st intron | MGST3     | -4.481±0.242 | -4.73±0.329  | 3.38E-05 |
| cg08343943 | 1 | 165668116 | GeneBody/1st intron       | LOC440700 | -4.393±0.467 | -4.715±0.448 | 1.59E-03 |
| cg18964732 | 1 | 165737775 | GeneBody/1st intron       | TMCO1     | -3.074±0.339 | -3.273±0.378 | 8.51E-03 |
| cg14108384 | 1 | 165738434 | TSS1500                   | TMCO1     | -4.23±0.353  | -4.482±0.509 | 3.18E-03 |
| cg15781625 | 1 | 165796654 | TSS200                    | UCK2      | -4.85±0.555  | -5.19±0.461  | 3.83E-03 |
| cg14256814 | 1 | 166808417 | TSS1500                   | POGK      | -4.085±0.245 | -4.257±0.259 | 1.57E-03 |
| cg26079320 | 1 | 166809407 | GeneBody/5'UTR/1st intron | POGK      | -3.517±0.31  | -3.703±0.27  | 4.84E-03 |
| cg09527021 | 1 | 166845374 | GeneBody/1st intron       | TADA1     | -4.444±0.381 | -4.824±0.485 | 4.12E-05 |
| cg08348962 | 1 | 166944393 | GeneBody/1st intron       | ILDR2     | -3.793±0.629 | -4.211±0.511 | 1.77E-03 |
| cg15965055 | 1 | 166945157 | TSS1500                   | ILDR2     | -4.497±0.222 | -4.704±0.26  | 7.48E-05 |
| cg24987706 | 1 | 167060788 | TSS1500                   | GPA33     | 2.546±0.256  | 2.727±0.22   | 1.07E-03 |
| cg21182322 | 1 | 167189623 | TSS1500                   | POU2F1    | -4.046±0.287 | -4.355±0.562 | 1.42E-04 |
| cg14046986 | 1 | 167599371 | TSS200                    | RCSN1     | -5.276±0.475 | -5.679±0.51  | 2.07E-04 |
| cg03001647 | 1 | 167691881 | GeneBody/1st intron       | MPZL1     | -3.649±0.452 | -3.944±0.541 | 4.10E-03 |
| cg08205865 | 1 | 167883379 | GeneBody/5'UTR/1st exon   | ADCY10    | 0.223±0.212  | 0.345±0.232  | 9.14E-03 |
| cg08412305 | 1 | 167904990 | GeneBody/1st exon         | MPC2      | -5.185±0.408 | -5.585±0.546 | 6.25E-05 |
| cg08151281 | 1 | 167905380 | GeneBody/1st exon         | MPC2      | -4.456±0.241 | -4.663±0.246 | 1.61E-04 |
| cg07684150 | 1 | 167906751 | TSS1500                   | MPC2      | -5.755±0.452 | -6.088±0.543 | 1.36E-03 |
| cg25219134 | 1 | 167906865 | TSS1500                   | MPC2      | -4.029±0.503 | -4.447±0.611 | 3.81E-04 |
| cg04736140 | 1 | 168105317 | GeneBody/5'UTR/1st exon   | GPR161    | -5.16±0.395  | -5.378±0.362 | 9.80E-03 |
| cg12739647 | 1 | 168195558 | GeneBody/1st intron       | SFT2D2    | -5.569±0.612 | -5.917±0.466 | 6.26E-03 |
| cg26220985 | 1 | 168698349 | GeneBody/1st exon         | DPT       | 1.219±0.282  | 1.018±0.274  | 1.22E-03 |
| cg26628634 | 1 | 169337140 | GeneBody/5'UTR/1st exon   | NME7      | -4.353±0.398 | -4.779±0.412 | 7.42E-06 |
| cg09891761 | 1 | 169555674 | GeneBody/5'UTR/1st exon   | F5        | -4.856±0.344 | -5.161±0.392 | 1.43E-04 |
| cg24597988 | 1 | 169681749 | TSS1500                   | SELL      | 1.725±0.344  | 1.94±0.287   | 3.26E-03 |
| cg26023751 | 1 | 169763990 | GeneBody/5'UTR/1st exon   | METTL18   | -5.652±0.396 | -5.955±0.389 | 5.67E-04 |

|             |   |           |                           |           |              |              |          |
|-------------|---|-----------|---------------------------|-----------|--------------|--------------|----------|
| cg23051655  | 1 | 169862721 | GeneBody/5'UTR/1st intron | SCYL3     | -5.068±0.48  | -5.431±0.477 | 6.73E-04 |
| cg23258063  | 1 | 169863210 | TSS200                    | SCYL3     | -5.208±0.479 | -5.578±0.416 | 4.28E-04 |
| cg10753582  | 1 | 170043676 | GeneBody/5'UTR/1st exon   | KIFAP3    | -4.052±0.198 | -4.421±0.404 | 1.03E-08 |
| cg06625811  | 1 | 170044077 | TSS200                    | KIFAP3    | -4.799±0.587 | -5.34±0.555  | 5.39E-05 |
| cg22068764  | 1 | 170501645 | GeneBody/1st intron       | GORAB     | -4.742±0.422 | -5.165±0.527 | 3.53E-04 |
| cg11594415  | 1 | 171454668 | GeneBody/5'UTR/1st exon   | PRRC2C    | -5.738±0.528 | -6.201±0.604 | 1.63E-05 |
| cg01653110  | 1 | 171711841 | TSS1500                   | VAMP4     | -4.045±0.707 | -4.68±0.674  | 7.80E-05 |
| cg01382363  | 1 | 171750382 | TSS1500                   | METTL13   | -4.125±0.5   | -4.426±0.533 | 6.39E-03 |
| cg01017147  | 1 | 171810105 | TSS1500                   | DNM3      | -1.369±0.199 | -1.571±0.316 | 8.66E-05 |
| cg11584111  | 1 | 172412837 | GeneBody/5'UTR/1st intron | PIGC      | -4.127±0.237 | -4.419±0.41  | 7.54E-06 |
| cg20442709  | 1 | 172501557 | TSS1500                   | SUCO      | -4.816±0.686 | -5.504±0.622 | 1.51E-05 |
| cg24241455  | 1 | 173683938 | TSS200                    | KLHL20    | -4.533±0.308 | -4.842±0.451 | 6.86E-05 |
| cg06189265  | 1 | 173837002 | TSS200                    | SNORD74   | -3.875±0.419 | -4.176±0.357 | 9.11E-04 |
| cg14047008  | 1 | 173887011 | TSS1500                   | SERPINC1  | 1.416±0.234  | 1.571±0.32   | 5.07E-03 |
| cg26001030  | 1 | 174128297 | TSS1500                   | RABGAP1L  | -5.013±0.484 | -5.387±0.435 | 4.50E-04 |
| cg18504532  | 1 | 174129335 | GeneBody/5'UTR/1st intron | RABGAP1L  | -4.728±0.544 | -5.036±0.568 | 9.79E-03 |
| cg25335775  | 1 | 174992314 | GeneBody/1st intron       | MRPS14    | -4.074±0.492 | -4.394±0.508 | 3.09E-03 |
| cg01095590  | 1 | 175161785 | GeneBody/5'UTR/1st exon   | KIAA0040  | -5.175±0.528 | -5.614±0.479 | 1.90E-04 |
| cg23492043  | 1 | 177134266 | TSS1500                   | ASTN1     | -2.851±0.21  | -3.01±0.26   | 1.19E-03 |
| cg25461905  | 1 | 178481807 | TSS1500                   | TEX35     | 3.709±0.226  | 3.959±0.346  | 1.95E-05 |
| cg11832543  | 1 | 178481818 | TSS1500                   | TEX35     | 2.988±0.255  | 3.201±0.369  | 6.59E-04 |
| cg08643928  | 1 | 178694481 | GeneBody/5'UTR/1st exon   | RALGPS2   | -5.222±0.444 | -5.698±0.658 | 2.73E-05 |
| cg01426743  | 1 | 178994243 | TSS1500                   | FAM20B    | 1.235±0.192  | 1.352±0.222  | 6.97E-03 |
| cg02709261  | 1 | 179051893 | GeneBody/1st intron       | TOR3A     | -4.891±0.273 | -5.165±0.442 | 1.13E-04 |
| cg12118011  | 1 | 179263295 | GeneBody/5'UTR/1st intron | SOAT1     | -3.917±0.353 | -4.166±0.538 | 4.22E-03 |
| cg23045073  | 1 | 179545458 | TSS1500                   | NPHS2     | -2.76±0.491  | -3.063±0.483 | 4.39E-03 |
| cg05421688  | 1 | 179711859 | TSS1500                   | FAM163A   | -3.658±0.273 | -3.963±0.502 | 5.33E-05 |
| cg07761912  | 1 | 179846929 | GeneBody/5'UTR/1st exon   | TOR1AIP2  | -4.513±0.539 | -4.934±0.535 | 2.22E-03 |
| cg03115649  | 1 | 179851535 | GeneBody/5'UTR/1st exon   | TOR1AIP1  | -5.959±0.744 | -6.634±0.662 | 5.91E-05 |
| cg17286491  | 1 | 179923514 | TSS1500                   | CEP350    | -4.168±0.428 | -4.449±0.549 | 4.63E-03 |
| cg25478157  | 1 | 179924306 | GeneBody/5'UTR/1st intron | CEP350    | -5.574±0.356 | -5.931±0.413 | 2.69E-05 |
| cg26750139  | 1 | 180471249 | GeneBody/1st exon         | ACBD6     | -5.54±0.559  | -6.013±0.569 | 1.91E-04 |
| cg00223186  | 1 | 180472200 | TSS200                    | ACBD6     | -4.658±0.467 | -4.986±0.549 | 2.03E-03 |
| cg08638395  | 1 | 180601032 | TSS200                    | XPR1      | -5.04±0.325  | -5.356±0.424 | 6.26E-05 |
| cg03565782  | 1 | 181057814 | GeneBody/5'UTR/1st exon   | IER5      | -6.153±0.574 | -6.767±0.611 | 8.33E-06 |
| cg17892328  | 1 | 182360794 | TSS1500                   | GLUL      | -4.743±0.36  | -5.133±0.524 | 2.05E-05 |
| cg261135716 | 1 | 182360902 | TSS1500                   | GLUL      | -4.835±0.464 | -5.116±0.617 | 9.55E-03 |
| cg20492121  | 1 | 182361258 | GeneBody/5'UTR/1st exon   | GLUL      | -4.893±0.338 | -5.132±0.54  | 4.88E-03 |
| cg16891895  | 1 | 182573455 | GeneBody/5'UTR/1st exon   | RGS16     | -4.042±0.311 | -4.304±0.528 | 1.24E-03 |
| cg18611847  | 1 | 182573759 | TSS1500                   | RGS16     | -4.803±0.312 | -5.032±0.516 | 4.03E-03 |
| cg10847798  | 1 | 182993452 | GeneBody/1st intron       | LAMC1     | -3.116±0.266 | -3.28±0.335  | 7.48E-03 |
| cg23735442  | 1 | 183441292 | TSS200                    | SMG7-AS1  | -4.541±0.461 | -4.82±0.418  | 4.59E-03 |
| cg02105034  | 1 | 183441865 | GeneBody/5'UTR/1st intron | SMG7      | -4.569±0.283 | -4.772±0.373 | 2.20E-03 |
| cg20271396  | 1 | 184020713 | TSS200                    | TSEN15    | -4.893±0.368 | -5.126±0.356 | 3.52E-03 |
| cg14773259  | 1 | 184021034 | GeneBody/1st intron       | TSEN15    | -5.478±0.456 | -5.76±0.411  | 3.83E-03 |
| cg19921776  | 1 | 184724497 | TSS1500                   | EDEM3     | -5.007±0.42  | -5.418±0.395 | 2.30E-05 |
| cg02360616  | 1 | 184943055 | GeneBody/1st intron       | FAM129A   | -5.512±0.509 | -5.909±0.488 | 4.60E-04 |
| cg26542888  | 1 | 185014264 | TSS1500                   | RNF2      | -6.645±0.375 | -6.891±0.498 | 5.07E-03 |
| cg23335946  | 1 | 185125966 | GeneBody/5'UTR/1st exon   | TRMT1L    | -4.615±0.292 | -4.848±0.313 | 4.41E-04 |
| cg16280922  | 1 | 185125973 | GeneBody/5'UTR/1st exon   | TRMT1L    | -4.283±0.196 | -4.398±0.222 | 8.50E-03 |
| cg25423402  | 1 | 185286075 | GeneBody/5'UTR/1st intron | IVNS1ABP  | -6.157±0.753 | -6.693±0.77  | 1.32E-03 |
| cg20041381  | 1 | 186344125 | GeneBody/1st exon         | TPR       | -4.391±0.314 | -4.714±0.471 | 5.36E-05 |
| cg12723191  | 1 | 186429967 | GeneBody/5'UTR/1st intron | PDC       | 2.497±0.352  | 2.724±0.254  | 2.09E-03 |
| cg13986130  | 1 | 186649330 | GeneBody/1st intron       | PTGS2     | -4.072±0.401 | -4.326±0.488 | 5.51E-03 |
| cg18335243  | 1 | 186649519 | GeneBody/5'UTR/1st exon   | PTGS2     | -4.454±0.281 | -4.732±0.523 | 3.13E-04 |
| cg09461185  | 1 | 186649631 | TSS200                    | PTGS2     | -4.608±0.343 | -4.867±0.375 | 8.34E-04 |
| cg19632206  | 1 | 190446756 | GeneBody/5'UTR/1st exon   | FAM5C     | -2.698±0.274 | -2.912±0.389 | 1.21E-03 |
| cg05023691  | 1 | 192605253 | TSS200                    | RGS13     | 0.827±0.313  | 1.056±0.358  | 1.33E-03 |
| cg05576974  | 1 | 193028138 | GeneBody/1st intron       | UCHL5     | -5.899±0.62  | -6.36±0.555  | 6.61E-04 |
| cg25921910  | 1 | 193090657 | TSS1500                   | CDC73     | -2.262±0.201 | -2.407±0.283 | 2.62E-03 |
| cg26793710  | 1 | 193091399 | GeneBody/1st exon         | CDC73     | -4.688±0.29  | -5.003±0.437 | 2.48E-05 |
| cg13372488  | 1 | 196577387 | GeneBody/1st exon         | KCNT2     | -3.592±0.363 | -3.878±0.422 | 6.27E-04 |
| cg04614339  | 1 | 196743672 | TSS1500                   | CFHR3     | 0.259±0.27   | 0.028±0.297  | 1.93E-04 |
| cg13650137  | 1 | 197115405 | GeneBody/1st exon         | ASPM      | -4.907±0.39  | -5.219±0.584 | 1.20E-03 |
| cg07214572  | 1 | 197881353 | TSS1500                   | LHX9      | -4.247±0.314 | -4.524±0.37  | 1.59E-04 |
| cg08008403  | 1 | 197881741 | GeneBody/1st intron       | LHX9      | -3.511±0.345 | -3.755±0.406 | 1.92E-03 |
| cg20406878  | 1 | 199996237 | TSS1500                   | NR5A2     | 0.83±0.39    | 0.49±0.48    | 2.19E-04 |
| cg09255666  | 1 | 200378965 | GeneBody/5'UTR/1st intron | ZNF281    | -5.679±0.718 | -6.347±0.656 | 4.54E-05 |
| cg23915111  | 1 | 200589553 | GeneBody/5'UTR/1st exon   | KIF14     | -2.517±0.157 | -2.644±0.234 | 1.09E-03 |
| cg24485466  | 1 | 200589999 | TSS200                    | KIF14     | -5.519±0.654 | -6.13±0.594  | 4.24E-05 |
| cg13945069  | 1 | 200638500 | GeneBody/5'UTR/1st intron | DDX59     | -4.188±0.296 | -4.493±0.435 | 4.81E-05 |
| cg14085328  | 1 | 200639502 | TSS1500                   | DDX59     | -3.838±0.344 | -4.139±0.47  | 3.09E-04 |
| cg14175580  | 1 | 200709051 | GeneBody/1st exon         | CAMSAP2   | -4.919±0.407 | -5.213±0.413 | 1.16E-03 |
| cg18330203  | 1 | 201346647 | GeneBody/5'UTR/1st intron | TNNT2     | 1.456±0.167  | 1.594±0.207  | 4.37E-04 |
| cg18692273  | 1 | 201347483 | TSS1500                   | TNNT2     | 3.227±0.219  | 3.568±0.382  | 1.07E-07 |
| cg17780098  | 1 | 201476311 | GeneBody/5'UTR/1st exon   | CSRP1     | -4.43±0.303  | -4.757±0.468 | 3.08E-05 |
| cg23687186  | 1 | 201798214 | TSS200                    | IPO9      | -3.756±0.269 | -3.908±0.221 | 6.96E-03 |
| cg19676312  | 1 | 201951586 | TSS200                    | RNPEP     | -3.906±0.275 | -4.205±0.45  | 3.71E-05 |
| cg01036148  | 1 | 201951866 | GeneBody/1st exon         | RNPEP     | -4.415±0.32  | -4.692±0.472 | 4.93E-04 |
| cg27261136  | 1 | 202113704 | GeneBody/5'UTR/1st exon   | ARL8A     | -5.088±0.335 | -5.307±0.341 | 2.91E-03 |
| cg06545845  | 1 | 202114092 | TSS1500                   | ARL8A     | -4.671±0.226 | -4.824±0.317 | 4.64E-03 |
| cg10091705  | 1 | 202317604 | TSS1500                   | PPP1R12B  | -4.551±0.357 | -4.836±0.427 | 5.79E-04 |
| cg05715649  | 1 | 202680562 | TSS1500                   | SYT2      | 0.064±0.196  | 0.249±0.242  | 7.90E-05 |
| cg00528052  | 1 | 202777295 | GeneBody/1st exon         | KDM5B     | -5.508±0.468 | -5.834±0.553 | 2.22E-03 |
| cg24744425  | 1 | 202858153 | GeneBody/1st exon         | RAB1F     | -4.933±0.512 | -5.357±0.655 | 4.70E-04 |
| cg19157971  | 1 | 202858393 | TSS200                    | RAB1F     | -5.226±0.587 | -5.771±0.554 | 4.82E-05 |
| cg27554769  | 1 | 202896170 | GeneBody/5'UTR/1st intron | KLHL12    | -4.56±0.349  | -4.88±0.353  | 6.70E-05 |
| cg04462209  | 1 | 202896493 | TSS200                    | KLHL12    | -6.249±0.616 | -6.693±0.625 | 1.14E-03 |
| cg12888039  | 1 | 202927266 | GeneBody/5'UTR/1st intron | ADIPOR1   | -5.373±0.617 | -5.825±0.617 | 9.38E-04 |
| cg20133313  | 1 | 202936090 | GeneBody/1st intron       | CYB5R1    | -4.529±0.405 | -4.807±0.502 | 2.87E-03 |
| cg18275051  | 1 | 202937114 | TSS1500                   | CYB5R1    | -2.749±0.399 | -3.032±0.475 | 1.92E-03 |
| cg19028804  | 1 | 202976344 | GeneBody/1st exon         | LOC401980 | -5.363±0.664 | -5.775±0.618 | 3.93E-03 |
| cg24337809  | 1 | 203274882 | GeneBody/1st intron       | BTG2      | -5.315±0.527 | -5.723±0.446 | 3.93E-04 |
| cg06672652  | 1 | 203830934 | GeneBody/1st intron       | SNRPE     | -4.45±0.3    | -4.861±0.447 | 4.63E-07 |
| cg20867633  | 1 | 204183116 | GeneBody/5'UTR/1st exon   | GOLT1A    | -2.608±0.379 | -2.915±0.398 | 3.51E-04 |

|            |   |           |                           |            |              |              |          |
|------------|---|-----------|---------------------------|------------|--------------|--------------|----------|
| cg21581873 | 1 | 204329307 | TSS1500                   | PLEKHA6    | -2.794±0.304 | -3.003±0.345 | 2.20E-03 |
| cg16072030 | 1 | 204381148 | TSS1500                   | PPP1R15B   | -5.179±0.407 | -5.485±0.399 | 6.75E-04 |
| cg05702633 | 1 | 204381220 | TSS1500                   | PPP1R15B   | -5.127±0.716 | -5.775±0.637 | 6.10E-05 |
| cg18119609 | 1 | 204485302 | TSS1500                   | MDM4       | -4.368±0.528 | -4.698±0.533 | 4.21E-03 |
| cg23807009 | 1 | 204485655 | GeneBody/5'UTR/1st intron | MDM4       | -4.866±0.492 | -5.269±0.569 | 3.89E-04 |
| cg05369166 | 1 | 204797507 | TSS1500                   | NFASC      | -3.46±0.366  | -3.726±0.454 | 1.67E-03 |
| cg11560403 | 1 | 205053460 | GeneBody/5'UTR/1st exon   | TMEM81     | 4.094±0.211  | 4.299±0.373  | 2.84E-04 |
| cg05290904 | 1 | 205091401 | TSS1500                   | RBBP5      | -4.002±0.488 | -4.337±0.599 | 2.86E-03 |
| cg23362667 | 1 | 205181077 | TSS1500                   | DSTYK      | -2.788±0.396 | -3.034±0.41  | 4.68E-03 |
| cg14514226 | 1 | 205197651 | TSS1500                   | TMCC2      | -4.592±0.452 | -4.958±0.439 | 3.01E-04 |
| cg05938725 | 1 | 205290905 | TSS200                    | NUAK2      | -5.206±0.701 | -5.638±0.549 | 3.40E-03 |
| cg06948937 | 1 | 205473404 | TSS1500                   | CDK18      | 1.535±0.207  | 1.67±0.253   | 4.47E-03 |
| cg21478222 | 1 | 205601572 | GeneBody/5'UTR/1st exon   | ELK4       | -4.369±0.386 | -4.738±0.573 | 1.40E-04 |
| cg13791589 | 1 | 205649091 | GeneBody/5'UTR/1st intron | SLC45A3    | -4.74±0.411  | -5.184±0.589 | 2.10E-05 |
| cg11480873 | 1 | 205744417 | GeneBody/5'UTR/1st exon   | RAB7L1     | -5.257±0.525 | -5.644±0.507 | 8.27E-04 |
| cg22577136 | 1 | 206644165 | GeneBody/5'UTR/1st intron | IKBKE      | -4.922±0.464 | -5.241±0.543 | 2.53E-03 |
| cg19452316 | 1 | 206680966 | GeneBody/1st exon         | RASSF5     | -4.532±0.729 | -5.242±0.748 | 3.06E-05 |
| cg08617916 | 1 | 206730453 | TSS200                    | RASSF5     | -4.229±0.283 | -4.602±0.413 | 8.21E-07 |
| cg23520347 | 1 | 206730839 | GeneBody/5'UTR/1st exon   | RASSF5     | -4.282±0.568 | -4.675±0.511 | 1.39E-03 |
| cg10662787 | 1 | 206785415 | GeneBody/1st intron       | EIF2D      | -3.941±0.344 | -3.631±0.481 | 2.34E-04 |
| cg09328024 | 1 | 206808174 | TSS1500                   | DYRK3      | -2.802±0.296 | -2.97±0.266  | 7.68E-03 |
| cg05916196 | 1 | 206972262 | GeneBody/1st exon         | IL19       | 1.844±0.304  | 2.059±0.25   | 9.96E-04 |
| cg06796611 | 1 | 207070834 | GeneBody/5'UTR/1st exon   | IL24       | 0.463±0.285  | 0.296±0.309  | 7.92E-03 |
| cg22926560 | 1 | 207226769 | GeneBody/5'UTR/1st intron | PFKFB2     | -4.37±0.497  | -4.665±0.568 | 8.08E-03 |
| cg06792598 | 1 | 207494733 | TSS200                    | CD55       | -4.003±0.353 | -4.222±0.322 | 3.84E-03 |
| cg00247489 | 1 | 207628182 | GeneBody/1st intron       | CR2        | -4.192±0.328 | -4.554±0.44  | 1.08E-05 |
| cg05825950 | 1 | 207669576 | GeneBody/5'UTR/1st exon   | CR1        | -2.727±0.38  | -2.992±0.417 | 1.89E-03 |
| cg16257086 | 1 | 207925400 | GeneBody/5'UTR/1st exon   | CD46       | -4.894±0.379 | -5.284±0.379 | 1.20E-05 |
| cg23983340 | 1 | 207925461 | GeneBody/5'UTR/1st exon   | CD46       | -4.725±0.369 | -5.019±0.437 | 5.80E-04 |
| cg11844110 | 1 | 208042623 | 0                         | 0          | -3.549±0.169 | -3.774±0.325 | 4.33E-06 |
| cg27337148 | 1 | 209756976 | TSS200                    | CAMK1G     | -1.833±0.22  | -1.591±0.3   | 1.18E-05 |
| cg03752689 | 1 | 209958185 | TSS1500                   | C1orf74    | -4.1±0.403   | -4.417±0.515 | 8.26E-04 |
| cg09686635 | 1 | 210001418 | GeneBody/1st exon         | DIEXF      | -2.592±0.349 | -2.266±0.38  | 6.30E-05 |
| cg22209624 | 1 | 210406738 | GeneBody/5'UTR/1st intron | SERTAD4    | -5.381±0.459 | -5.642±0.495 | 9.99E-03 |
| cg09276883 | 1 | 210501966 | TSS1500                   | HHAT       | -3.065±0.229 | -3.238±0.324 | 1.67E-03 |
| cg15945769 | 1 | 210502792 | GeneBody/5'UTR/1st exon   | HHAT       | -4.631±0.424 | -4.949±0.416 | 7.22E-04 |
| cg22197787 | 1 | 211306986 | GeneBody/1st intron       | KCNH1      | -4.878±0.477 | -5.184±0.461 | 3.14E-03 |
| cg19652869 | 1 | 211751907 | GeneBody/1st exon         | SLC30A1    | -5.508±0.507 | -5.844±0.51  | 2.48E-03 |
| cg25466974 | 1 | 211752620 | TSS1500                   | SLC30A1    | -4.975±0.346 | -5.224±0.655 | 7.76E-03 |
| cg14513226 | 1 | 212003502 | GeneBody/5'UTR/1st intron | LPGAT1     | -4.963±0.492 | -5.252±0.486 | 6.87E-03 |
| cg11901954 | 1 | 212209499 | TSS1500                   | INTS7      | -3.795±0.422 | -4.204±0.494 | 4.66E-05 |
| cg25413757 | 1 | 212588395 | TSS200                    | TMEM206    | -5.153±0.462 | -5.536±0.396 | 1.73E-04 |
| cg17979628 | 1 | 212606106 | TSS200                    | NENF       | -4.008±0.345 | -4.27±0.473  | 1.48E-03 |
| cg21421701 | 1 | 212872679 | GeneBody/1st intron       | BATF3      | -4.893±0.334 | -5.111±0.533 | 9.41E-03 |
| cg06150468 | 1 | 212874085 | TSS1500                   | BATF3      | -4.153±0.327 | -4.497±0.428 | 2.05E-05 |
| cg20112035 | 1 | 212965051 | GeneBody/1st exon         | NSL1       | -3.584±0.24  | -3.387±0.341 | 7.45E-04 |
| cg06593568 | 1 | 212965581 | GeneBody/1st intron       | TATDN3     | -4.252±0.321 | -4.509±0.393 | 5.88E-04 |
| cg13240598 | 1 | 213031266 | GeneBody/1st exon         | FLVCR1-AS1 | -5.015±0.335 | -5.212±0.349 | 7.31E-03 |
| cg03455458 | 1 | 213124545 | GeneBody/5'UTR/1st intron | VASH2      | -4.044±0.25  | -4.262±0.429 | 8.67E-04 |
| cg17969298 | 1 | 213189164 | GeneBody/5'UTR/1st exon   | ANGEL2     | -4.216±0.243 | -4.384±0.264 | 1.99E-03 |
| cg03386140 | 1 | 213189190 | TSS200                    | ANGEL2     | -4.973±0.476 | -5.413±0.509 | 6.72E-05 |
| cg14019317 | 1 | 214161306 | GeneBody/5'UTR/1st exon   | PROX1      | -4.033±0.324 | -4.259±0.371 | 2.06E-03 |
| cg08466883 | 1 | 215741318 | GeneBody/1st intron       | KCTD3      | -3.908±0.282 | -4.233±0.401 | 7.07E-06 |
| cg23273333 | 1 | 217262889 | GeneBody/5'UTR/1st exon   | ESRRG      | -2.842±0.458 | -3.204±0.44  | 3.86E-04 |
| cg03750606 | 1 | 217262978 | GeneBody/5'UTR/1st exon   | ESRRG      | -3.503±0.287 | -3.691±0.321 | 3.31E-03 |
| cg07411229 | 1 | 217804382 | GeneBody/5'UTR/1st exon   | GPATCH2    | -4.679±0.572 | -5.065±0.593 | 2.21E-03 |
| cg02665570 | 1 | 219347340 | GeneBody/1st intron       | LYPLAL1    | -5.091±0.309 | -5.447±0.507 | 1.59E-05 |
| cg16062480 | 1 | 220219722 | GeneBody/1st exon         | EPRS       | -5.304±0.609 | -5.837±0.632 | 1.32E-04 |
| cg24903794 | 1 | 220220036 | TSS200                    | EPRS       | -4.962±0.444 | -5.315±0.557 | 7.10E-04 |
| cg24124789 | 1 | 220268095 | GeneBody/1st intron       | IARS2      | -4.646±0.355 | -4.971±0.506 | 2.09E-04 |
| cg08293760 | 1 | 220445750 | GeneBody/5'UTR/1st exon   | RAB3GAP2   | -4.842±0.398 | -5.114±0.491 | 3.00E-03 |
| cg21852292 | 1 | 220863407 | TSS1500                   | C1orf115   | -2.69±0.322  | -2.914±0.416 | 2.92E-03 |
| cg13170032 | 1 | 221052143 | TSS1500                   | HLX        | -3.314±0.524 | -3.799±0.514 | 5.38E-05 |
| cg22650146 | 1 | 221915355 | GeneBody/5'UTR/1st exon   | DUSP10     | -4±0.156     | -4.099±0.202 | 6.02E-03 |
| cg23221122 | 1 | 221915794 | TSS1500                   | DUSP10     | -5.127±0.414 | -5.381±0.383 | 4.34E-03 |
| cg25385272 | 1 | 222763149 | GeneBody/5'UTR/1st exon   | TAF1A      | -4.375±0.427 | -4.625±0.501 | 9.27E-03 |
| cg02878987 | 1 | 222885407 | GeneBody/1st intron       | AIDA       | -3.932±0.197 | -4.094±0.225 | 3.63E-04 |
| cg11177955 | 1 | 222886490 | GeneBody/5'UTR/1st intron | BROX       | -5.382±0.621 | -5.927±0.493 | 7.77E-05 |
| cg16307860 | 1 | 222886951 | GeneBody/5'UTR/1st intron | BROX       | -2.153±0.295 | -2.346±0.436 | 6.93E-03 |
| cg26168975 | 1 | 222887019 | GeneBody/5'UTR/1st intron | BROX       | -4.155±0.358 | -4.398±0.502 | 4.50E-03 |
| cg20695057 | 1 | 224034220 | TSS1500                   | TP53BP2    | -5.119±0.603 | -5.486±0.485 | 3.81E-03 |
| cg16028934 | 1 | 224034222 | TSS1500                   | TP53BP2    | -4.97±0.596  | -5.39±0.586  | 1.34E-03 |
| cg20030671 | 1 | 224301701 | TSS200                    | FBXO28     | -4.762±0.451 | -5.028±0.364 | 5.06E-03 |
| cg17063018 | 1 | 224302019 | GeneBody/1st exon         | FBXO28     | -4.737±0.368 | -5.051±0.605 | 8.88E-04 |
| cg03496978 | 1 | 224302360 | GeneBody/1st intron       | FBXO28     | -2.209±0.209 | -2.426±0.296 | 3.53E-05 |
| cg03037331 | 1 | 224371490 | GeneBody/1st intron       | DEGS1      | -5.47±0.421  | -5.904±0.393 | 1.07E-05 |
| cg01411954 | 1 | 224517830 | GeneBody/5'UTR/1st exon   | NVL        | -4.754±0.265 | -4.942±0.268 | 1.34E-03 |
| cg22762951 | 1 | 224518104 | TSS1500                   | NVL        | -4.277±0.48  | -4.601±0.484 | 2.13E-03 |
| cg01785339 | 1 | 224544456 | TSS200                    | CNIH4      | -3.659±0.454 | -3.927±0.557 | 9.61E-03 |
| cg02254649 | 1 | 225840109 | GeneBody/1st intron       | ENAH       | -4.368±0.382 | -4.64±0.393  | 1.37E-03 |
| cg15676084 | 1 | 225841605 | TSS1500                   | ENAH       | -4.322±0.294 | -4.551±0.436 | 1.57E-03 |
| cg15368822 | 1 | 226070397 | GeneBody/5'UTR/1st exon   | TMEM63A    | -4.164±0.217 | -4.31±0.282  | 3.96E-03 |
| cg18947521 | 1 | 226250437 | GeneBody/1st exon         | H3F3AP4    | -4.974±0.38  | -5.207±0.345 | 4.26E-03 |
| cg15863254 | 1 | 226374036 | GeneBody/1st intron       | ACBD3      | -3.876±0.231 | -4.01±0.265  | 9.94E-03 |
| cg12962021 | 1 | 226497619 | TSS200                    | LIN9       | -3.232±0.465 | -3.539±0.535 | 3.43E-03 |
| cg01259619 | 1 | 226925702 | GeneBody/5'UTR/1st intron | ITPKB      | -6.17±0.499  | -6.61±0.53   | 1.29E-04 |
| cg21261477 | 1 | 227127707 | TSS1500                   | ADCK3      | -4.637±0.254 | -4.866±0.269 | 9.06E-05 |
| cg10399369 | 1 | 227128009 | GeneBody/5'UTR/1st exon   | ADCK3      | -5.571±0.683 | -6.29±0.688  | 8.59E-06 |
| cg00935430 | 1 | 227751290 | GeneBody/1st exon         | ZNF678     | -4.173±0.413 | -4.429±0.429 | 4.77E-03 |
| cg00012386 | 1 | 227922512 | TSS200                    | SNAP47     | -4.331±0.302 | -4.692±0.401 | 2.80E-06 |
| cg08299045 | 1 | 228296964 | GeneBody/5'UTR/1st exon   | MRPL55     | -5.253±0.337 | -5.682±0.572 | 3.87E-06 |
| cg21515744 | 1 | 228327456 | TSS1500                   | GUK1       | -4.375±0.334 | -4.763±0.378 | 1.96E-05 |
| cg23540518 | 1 | 228604566 | GeneBody/5'UTR/1st exon   | TRIM17     | -1.478±0.428 | -1.071±0.569 | 9.66E-05 |
| cg00143998 | 1 | 228645859 | GeneBody/1st exon         | HIST3H2BB  | -4.02±0.367  | -4.304±0.396 | 6.29E-04 |
| cg14743462 | 1 | 228646946 | TSS1500                   | HIST3H2A   | -4.499±0.313 | -4.719±0.439 | 3.32E-03 |

|            |   |           |                           |              |              |              |          |
|------------|---|-----------|---------------------------|--------------|--------------|--------------|----------|
| cg23274123 | 1 | 229478617 | GeneBody/5'UTR/1st intron | CCSAP        | -5.053±0.528 | -5.453±0.729 | 1.54E-03 |
| cg15056107 | 1 | 229644037 | GeneBody/5'UTR/1st exon   | NUP133       | -4.573±0.305 | -4.861±0.432 | 1.37E-04 |
| cg18058949 | 1 | 229644400 | TSS1500                   | NUP133       | -4.004±0.344 | -4.355±0.5   | 5.17E-05 |
| cg18220284 | 1 | 229762532 | GeneBody/5'UTR/1st intron | URB2         | -4.609±0.602 | -4.969±0.502 | 4.59E-03 |
| cg04702490 | 1 | 230202430 | TSS1500                   | GALNT2       | -4.331±0.322 | -4.583±0.457 | 1.19E-03 |
| cg13769204 | 1 | 230203611 | GeneBody/1st intron       | GALNT2       | -4.409±0.332 | -4.685±0.437 | 5.00E-04 |
| cg17031727 | 1 | 230777875 | TSS1500                   | COG2         | -2.345±0.209 | -2.563±0.331 | 5.76E-05 |
| cg22647018 | 1 | 230849519 | GeneBody/5'UTR/1st intron | AGT          | 2.133±0.222  | 2.275±0.32   | 7.99E-03 |
| cg27412093 | 1 | 230882387 | TSS1500                   | CAPN9        | 1.423±0.255  | 1.566±0.24   | 8.59E-03 |
| cg10348643 | 1 | 231004374 | TSS200                    | C1orf198     | -4.789±0.413 | -5.094±0.493 | 1.32E-03 |
| cg02844629 | 1 | 231114732 | TSS200                    | ARV1         | -4.303±0.344 | -4.532±0.421 | 3.61E-03 |
| cg00679738 | 1 | 231175246 | GeneBody/1st intron       | FAM89A       | -4.686±0.336 | -5.009±0.426 | 6.75E-05 |
| cg07897837 | 1 | 231377046 | TSS200                    | C1orf131     | -5.942±0.47  | -6.215±0.503 | 8.47E-03 |
| cg23213688 | 1 | 231473791 | GeneBody/5'UTR/1st exon   | SPRTN        | -4.388±0.508 | -4.893±0.554 | 2.64E-05 |
| cg16616325 | 1 | 231664276 | TSS200                    | TSNAX-DISC1  | -5.297±0.39  | -5.627±0.309 | 1.23E-04 |
| cg01447498 | 1 | 231664671 | GeneBody/1st intron       | TSNAX-DISC1  | -3.498±0.452 | -3.892±0.565 | 2.29E-04 |
| cg24499839 | 1 | 231762238 | TSS1500                   | DISC1        | -4.558±0.482 | -4.971±0.457 | 1.39E-04 |
| cg18565479 | 1 | 231762737 | GeneBody/1st intron       | DISC1        | -5.332±0.512 | -5.729±0.493 | 4.92E-04 |
| cg10375802 | 1 | 233086192 | TSS200                    | NTPCR        | -3.937±0.266 | -4.147±0.436 | 1.96E-03 |
| cg04049800 | 1 | 233086374 | GeneBody/5'UTR/1st exon   | NTPCR        | -5.587±0.491 | -6.048±0.428 | 3.60E-05 |
| cg13904493 | 1 | 233464194 | GeneBody/1st exon         | KIAA1804     | -5.54±0.617  | -5.909±0.566 | 5.28E-03 |
| cg11815363 | 1 | 233750184 | GeneBody/1st exon         | KCNK1        | -3.922±0.39  | -4.255±0.582 | 5.91E-04 |
| cg11029501 | 1 | 234614232 | GeneBody/1st exon         | TARBP1       | -5.912±0.665 | -6.497±0.647 | 1.08E-04 |
| cg05144089 | 1 | 235292386 | TSS200                    | TOMM20       | -4.273±0.368 | -4.688±0.507 | 8.59E-06 |
| cg09144196 | 1 | 235324804 | TSS1500                   | RBM34        | -4.33±0.382  | -4.574±0.371 | 3.23E-03 |
| cg06212607 | 1 | 235491708 | TSS200                    | GGPS1        | -4.74±0.378  | -5.077±0.442 | 1.41E-04 |
| cg18036707 | 1 | 235530995 | GeneBody/5'UTR/1st intron | TBCE         | -4.977±0.443 | -5.39±0.538  | 8.71E-05 |
| cg16505687 | 1 | 236305169 | TSS1500                   | GPR137B      | -4.526±0.561 | -5.014±0.697 | 1.17E-04 |
| cg26534508 | 1 | 236306311 | GeneBody/1st exon         | GPR137B      | -4.619±0.266 | -5.014±0.492 | 4.65E-07 |
| cg07093046 | 1 | 236958653 | GeneBody/5'UTR/1st exon   | MTR          | -5.649±0.453 | -6.166±0.635 | 7.54E-06 |
| cg15602809 | 1 | 239792464 | GeneBody/5'UTR/1st exon   | CHRM3        | 0.416±0.101  | 0.519±0.128  | 2.67E-05 |
| cg06803184 | 1 | 241683075 | GeneBody/5'UTR/1st exon   | FH           | -4.729±0.292 | -4.957±0.332 | 6.43E-04 |
| cg27277403 | 1 | 241694934 | TSS1500                   | KMO          | -3.174±0.606 | -3.606±0.501 | 9.13E-04 |
| cg07639959 | 1 | 242011162 | TSS1500                   | EXO1         | -4.957±0.482 | -5.495±0.465 | 3.41E-06 |
| cg20629097 | 1 | 242011587 | GeneBody/5'UTR/1st exon   | EXO1         | -4.639±0.432 | -5.002±0.616 | 5.74E-04 |
| cg15965913 | 1 | 244816200 | TSS200                    | DES12        | -3.952±0.254 | -4.215±0.373 | 4.33E-05 |
| cg15160742 | 1 | 244817222 | GeneBody/1st intron       | DES12        | -4.477±0.415 | -4.737±0.431 | 4.40E-03 |
| cg09998519 | 1 | 245028194 | TSS1500                   | HNRNP1       | -4.329±0.344 | -4.614±0.454 | 5.10E-04 |
| cg20615951 | 1 | 246730188 | GeneBody/5'UTR/1st intron | CNST         | -6.048±0.516 | -6.373±0.446 | 3.11E-03 |
| cg15210596 | 1 | 246887325 | TSS200                    | SCCPDH       | -4.51±0.336  | -4.715±0.424 | 8.09E-03 |
| cg20478514 | 1 | 246887464 | GeneBody/5'UTR/1st exon   | SCCPDH       | -5.666±0.581 | -6.263±0.571 | 1.20E-05 |
| cg07448856 | 1 | 247242043 | GeneBody/5'UTR/1st exon   | ZNF670       | -5.278±0.433 | -5.576±0.623 | 4.22E-03 |
| cg20377677 | 1 | 247494979 | GeneBody/5'UTR/1st exon   | ZNF496       | -3.732±0.258 | -3.875±0.235 | 9.49E-03 |
| cg01184522 | 1 | 247495818 | TSS1500                   | ZNF496       | -4.989±0.378 | -5.269±0.508 | 1.79E-03 |
| cg13397379 | 1 | 247696628 | GeneBody/5'UTR/1st intron | OR2C3        | 1.579±0.287  | 1.801±0.29   | 5.31E-04 |
| cg20855565 | 1 | 248020350 | TSS200                    | TRIM58       | -3.797±0.364 | -4.048±0.487 | 3.35E-03 |
| cg27341860 | 1 | 248099880 | TSS1500                   | OR2L13       | 2.621±0.247  | 2.824±0.349  | 7.09E-04 |
| cg16479674 | 1 | 249131947 | TSS1500                   | ZNF672       | -4.784±0.478 | -5.179±0.469 | 2.35E-04 |
| cg14931645 | 1 | 249133278 | GeneBody/5'UTR/1st intron | ZNF672       | -4.749±0.438 | -5.013±0.492 | 6.87E-03 |
| cg21825027 | 2 | 264166    | TSS200                    | SH3YL1       | -5.522±0.42  | -5.776±0.486 | 7.08E-03 |
| cg06506156 | 2 | 3381578   | GeneBody/5'UTR/1st exon   | TSSC1        | -4.868±0.434 | -5.306±0.526 | 2.90E-05 |
| cg03107405 | 2 | 3381941   | TSS1500                   | TSSC1        | -5.31±0.509  | -5.645±0.62  | 4.07E-03 |
| cg15161785 | 2 | 3523134   | GeneBody/1st intron       | ADI1         | -6.094±0.515 | -6.386±0.552 | 9.99E-03 |
| cg04344347 | 2 | 3523406   | TSS200                    | ADI1         | -4.965±0.325 | -5.245±0.633 | 1.84E-03 |
| cg03994908 | 2 | 3605817   | GeneBody/1st exon         | RNASEH1      | -5.378±0.511 | -5.69±0.471  | 4.46E-03 |
| cg03708463 | 2 | 3606331   | GeneBody/1st exon         | LOC100506054 | -4.856±0.366 | -5.13±0.303  | 5.44E-04 |
| cg18201077 | 2 | 7017787   | TSS200                    | RSAD2        | -4.067±0.458 | -4.515±0.467 | 2.73E-05 |
| cg13051968 | 2 | 7057649   | GeneBody/5'UTR/1st exon   | RNF144A      | -6.425±0.59  | -6.927±0.703 | 2.73E-04 |
| cg23525180 | 2 | 8821746   | TSS1500                   | ID2          | -4.404±0.378 | -4.71±0.41   | 3.76E-04 |
| cg23889771 | 2 | 9563077   | GeneBody/5'UTR/1st intron | ITGB1BP1     | -4.837±0.371 | -5.139±0.467 | 5.48E-04 |
| cg07974891 | 2 | 9565042   | GeneBody/1st intron       | CPSF3        | -0.132±0.274 | -0.316±0.401 | 5.48E-03 |
| cg19081759 | 2 | 9771089   | GeneBody/5'UTR/1st exon   | YWHAQ        | -5.707±0.677 | -6.152±0.697 | 2.79E-03 |
| cg08494812 | 2 | 9983427   | TSS200                    | TAF1B        | -4.468±0.546 | -4.948±0.603 | 1.42E-04 |
| cg20389709 | 2 | 10184303  | TSS200                    | KLF11        | -2.791±0.905 | -3.706±1.093 | 6.05E-05 |
| cg02237186 | 2 | 10263043  | GeneBody/1st intron       | RRM2         | -4.438±0.457 | -4.744±0.492 | 2.62E-03 |
| cg05404787 | 2 | 10281526  | TSS1500                   | C2orf48      | 2.765±0.263  | 3.028±0.312  | 3.12E-05 |
| cg05741384 | 2 | 10588838  | TSS1500                   | ODC1         | -4.256±0.28  | -4.496±0.378 | 3.84E-04 |
| cg06058597 | 2 | 10829993  | GeneBody/1st exon         | NOL10        | -5.379±0.417 | -5.665±0.448 | 2.10E-03 |
| cg22403851 | 2 | 10952734  | GeneBody/1st intron       | PDIA6        | -5.203±0.484 | -5.593±0.606 | 6.01E-04 |
| cg03402876 | 2 | 11051991  | TSS200                    | KCNF1        | -5.621±0.584 | -6.032±0.704 | 2.13E-03 |
| cg04916311 | 2 | 11295222  | TSS1500                   | PQLC3        | -4.584±0.384 | -4.802±0.326 | 7.14E-03 |
| cg19728485 | 2 | 11295717  | GeneBody/1st exon         | PQLC3        | -5.442±0.573 | -6.061±0.68  | 9.46E-06 |
| cg12320676 | 2 | 11605714  | GeneBody/1st intron       | E2F6         | -3.724±0.351 | -3.953±0.471 | 5.66E-03 |
| cg12858075 | 2 | 11606497  | TSS200                    | E2F6         | -4.541±0.442 | -4.861±0.47  | 1.24E-03 |
| cg24624819 | 2 | 11886776  | GeneBody/5'UTR/1st exon   | LPIN1        | -4.946±0.53  | -5.415±0.627 | 1.61E-04 |
| cg06636463 | 2 | 15731711  | TSS200                    | DDX1         | -3.283±0.303 | -3.599±0.39  | 2.23E-05 |
| cg16597172 | 2 | 16080669  | TSS200                    | MYCN         | -4.977±0.472 | -5.299±0.498 | 2.10E-03 |
| cg24242519 | 2 | 16846569  | GeneBody/5'UTR/1st intron | FAM49A       | -3.123±0.42  | -3.604±0.511 | 4.01E-06 |
| cg25306927 | 2 | 17721751  | TSS200                    | VSNL1        | -4.413±0.336 | -4.76±0.468  | 3.41E-05 |
| cg03580351 | 2 | 17935719  | GeneBody/5'UTR/1st intron | GEN1         | -5.21±0.462  | -5.631±0.543 | 1.06E-04 |
| cg18220560 | 2 | 17936424  | GeneBody/5'UTR/1st intron | GEN1         | -2.536±0.233 | -2.736±0.319 | 3.89E-04 |
| cg19638349 | 2 | 18741870  | GeneBody/5'UTR/1st exon   | RDH14        | -4.153±0.272 | -4.354±0.48  | 4.87E-03 |
| cg17741106 | 2 | 18742122  | TSS200                    | RDH14        | -4.698±0.46  | -5.036±0.492 | 1.08E-03 |
| cg02742971 | 2 | 19558059  | GeneBody/5'UTR/1st intron | OSR1         | -4.414±0.352 | -4.641±0.54  | 9.11E-03 |
| cg24297976 | 2 | 20189487  | GeneBody/1st intron       | WDR35        | -4.083±0.302 | -4.281±0.323 | 3.09E-03 |
| cg11475332 | 2 | 20425343  | TSS200                    | SDC1         | -5.55±0.464  | -5.824±0.58  | 9.92E-03 |
| cg01419675 | 2 | 20646880  | GeneBody/5'UTR/1st exon   | RHOB         | -3.436±0.373 | -3.726±0.411 | 6.17E-04 |
| cg05790999 | 2 | 20850809  | GeneBody/1st exon         | HS1BP3       | -5.824±0.514 | -6.139±0.518 | 5.06E-03 |
| cg09109450 | 2 | 21022565  | GeneBody/5'UTR/1st intron | C2orf43      | -3.606±0.169 | -3.725±0.269 | 4.91E-03 |
| cg16406212 | 2 | 24163862  | GeneBody/5'UTR/1st intron | UBXN2A       | -4.626±0.562 | -5.072±0.602 | 4.59E-04 |
| cg04809136 | 2 | 24300158  | TSS1500                   | SF3B14       | -4.3±0.414   | -4.59±0.493  | 2.15E-03 |
| cg04461705 | 2 | 24346867  | GeneBody/5'UTR/1st intron | FAM228B      | -3.01±0.174  | -3.23±0.285  | 3.29E-06 |
| cg25477928 | 2 | 24583610  | TSS1500                   | ITSN2        | -3.455±0.248 | -3.73±0.314  | 7.80E-06 |
| cg18128666 | 2 | 24806720  | TSS1500                   | NCOA1        | 2.853±0.282  | 3.053±0.325  | 1.83E-03 |
| cg21494337 | 2 | 25015597  | TSS1500                   | CENPO        | -3.606±0.499 | -3.948±0.6   | 2.65E-03 |

|             |   |          |                           |                     |              |              |          |
|-------------|---|----------|---------------------------|---------------------|--------------|--------------|----------|
| cg20251973  | 2 | 25016338 | GeneBody/5'UTR/1st exon   | <i>CENPO</i>        | -4.826±0.444 | -5.163±0.626 | 1.62E-03 |
| cg14002682  | 2 | 25195127 | GeneBody/1st intron       | <i>DNAJC27-AS1</i>  | -5.119±0.552 | -5.715±0.581 | 6.85E-06 |
| cg12066181  | 2 | 25565288 | GeneBody/5'UTR/1st intron | <i>DNMT3A</i>       | -4.575±0.511 | -4.922±0.484 | 1.85E-03 |
| cg00094851  | 2 | 26205706 | TSS1500                   | <i>KIF3C</i>        | -3.238±0.211 | -3.519±0.33  | 9.77E-07 |
| cg03839341  | 2 | 26256490 | TSS1500                   | <i>RAB10</i>        | -5.687±0.442 | -5.957±0.56  | 8.01E-03 |
| cg11109684  | 2 | 26257047 | GeneBody/5'UTR/1st exon   | <i>RAB10</i>        | -5.25±0.393  | -5.605±0.499 | 1.61E-04 |
| cg01355520  | 2 | 26468086 | GeneBody/5'UTR/1st intron | <i>HADHB</i>        | -3.768±0.391 | -4.083±0.476 | 5.38E-04 |
| cg19635810  | 2 | 26987197 | GeneBody/5'UTR/1st exon   | <i>SLC35F6</i>      | -5.804±0.544 | -6.183±0.526 | 1.46E-03 |
| cg21360828  | 2 | 27008380 | TSS1500                   | <i>CENPA</i>        | -3.43±0.334  | -3.711±0.417 | 3.56E-04 |
| cg14934766  | 2 | 27009384 | GeneBody/1st intron       | <i>CENPA</i>        | -4.403±0.317 | -4.61±0.516  | 9.80E-03 |
| cg15895197  | 2 | 27301490 | GeneBody/5'UTR/1st exon   | <i>EMILIN1</i>      | -0.618±0.159 | -0.505±0.169 | 1.50E-03 |
| cg14527441  | 2 | 27309759 | GeneBody/5'UTR/1st exon   | <i>KHK</i>          | -4.842±0.27  | -5.129±0.422 | 4.12E-05 |
| cg17605847  | 2 | 27356922 | GeneBody/1st intron       | <i>PREB</i>         | -4.655±0.351 | -5.089±0.527 | 2.81E-06 |
| cg06288632  | 2 | 27358152 | TSS1500                   | <i>PREB</i>         | 4.084±0.274  | 4.372±0.349  | 1.81E-05 |
| cg14672622  | 2 | 27434752 | TSS200                    | <i>ATRAID</i>       | -4.274±0.361 | -4.494±0.478 | 9.15E-03 |
| cg03875195  | 2 | 27486363 | TSS1500                   | <i>SLC30A3</i>      | -2.609±0.217 | -2.752±0.214 | 2.57E-03 |
| cg10239941  | 2 | 27545751 | GeneBody/5'UTR/1st intron | <i>MPV17</i>        | -4.369±0.326 | -4.826±0.409 | 1.24E-07 |
| cg17509807  | 2 | 27579505 | GeneBody/5'UTR/1st intron | <i>GTF3C2</i>       | -4.852±0.363 | -5.129±0.28  | 4.08E-04 |
| cg24189717  | 2 | 27593355 | TSS200                    | <i>SNX17</i>        | -3.667±0.226 | -3.927±0.395 | 2.34E-05 |
| cg25896975  | 2 | 27593451 | GeneBody/1st exon         | <i>SNX17</i>        | -4.983±0.346 | -5.31±0.474  | 1.19E-04 |
| cg11618577  | 2 | 27665543 | GeneBody                  | <i>KRTCAP3</i>      | 0.484±0.191  | 0.616±0.203  | 1.89E-03 |
| cg23591853  | 2 | 27712996 | TSS1500                   | <i>IFT172</i>       | -1.803±0.247 | -2.007±0.326 | 5.13E-04 |
| cg01464985  | 2 | 27805622 | TSS1500                   | <i>ZNF512</i>       | -2.522±0.201 | -2.684±0.273 | 7.35E-04 |
| cg18611281  | 2 | 27805844 | GeneBody/5'UTR/1st exon   | <i>ZNF512</i>       | -3.206±0.367 | -3.464±0.432 | 2.01E-03 |
| cg22584335  | 2 | 27806067 | GeneBody/5'UTR/1st intron | <i>ZNF512</i>       | -3.975±0.538 | -4.409±0.524 | 5.07E-04 |
| cg17050100  | 2 | 27852231 | TSS1500                   | <i>CCDC121</i>      | -5.48±0.534  | -5.971±0.512 | 5.81E-05 |
| cg09223071  | 2 | 27886442 | GeneBody/5'UTR/1st exon   | <i>SUPT7L</i>       | -5.19±0.614  | -5.653±0.548 | 5.56E-04 |
| cg18340214  | 2 | 27994451 | TSS200                    | <i>MRPL33</i>       | -5.324±0.42  | -5.591±0.546 | 6.20E-03 |
| cg27063607  | 2 | 27994684 | GeneBody/1st intron       | <i>MRPL33</i>       | -5.092±0.611 | -5.576±0.665 | 5.00E-04 |
| cg06869899  | 2 | 28113326 | TSS200                    | <i>RBKS</i>         | -4.699±0.347 | -5.052±0.552 | 8.75E-05 |
| cg08351105  | 2 | 28614671 | TSS1500                   | <i>FOSL2</i>        | -5.574±0.66  | -6.019±0.574 | 1.72E-03 |
| cg07342545  | 2 | 28616193 | GeneBody/5'UTR/1st exon   | <i>FOSL2</i>        | -5.033±0.401 | -5.386±0.491 | 1.93E-04 |
| cg16276199  | 2 | 28974102 | TSS1500                   | <i>PPP1CB</i>       | -4.857±0.42  | -5.19±0.376  | 3.26E-04 |
| cg06816106  | 2 | 29033352 | TSS1500                   | <i>SPDYA</i>        | -4.583±0.39  | -4.926±0.406 | 1.23E-04 |
| cg22841169  | 2 | 30369455 | TSS1500                   | <i>YPEL5</i>        | -4.777±0.566 | -5.114±0.436 | 4.41E-03 |
| cg05714219  | 2 | 31361104 | GeneBody/1st exon         | <i>GALNT14</i>      | -4.597±0.344 | -4.805±0.417 | 7.71E-03 |
| cg05882522  | 2 | 31456789 | TSS200                    | <i>EHD3</i>         | -4.497±0.228 | -4.744±0.263 | 7.97E-06 |
| cg11074746  | 2 | 32236343 | TSS1500                   | <i>MEMO1</i>        | -5.249±0.429 | -5.677±0.473 | 2.49E-05 |
| cg07656391  | 2 | 32264720 | GeneBody/5'UTR/1st exon   | <i>DPY30</i>        | -3.874±0.58  | -4.342±0.618 | 3.82E-04 |
| cg26820922  | 2 | 32503023 | GeneBody/5'UTR/1st exon   | <i>YIPF4</i>        | -5.41±0.477  | -5.793±0.593 | 6.11E-04 |
| cg19098826  | 2 | 32581711 | TSS1500                   | <i>BIRC6</i>        | -4.661±0.375 | -5.082±0.482 | 7.02E-06 |
| cg15673110  | 2 | 32581747 | TSS1500                   | <i>BIRC6</i>        | -4.728±0.333 | -5.001±0.446 | 5.83E-04 |
| cg27072387  | 2 | 33171699 | TSS1500                   | <i>LTBP1</i>        | -4.405±0.392 | -4.758±0.47  | 1.32E-04 |
| cg07571117  | 2 | 33824316 | GeneBody/5'UTR/1st exon   | <i>FAM98A</i>       | -5.155±0.561 | -5.541±0.566 | 1.79E-03 |
| cg25900806  | 2 | 33953779 | TSS1500                   | <i>MYADML</i>       | 0.47±0.182   | 0.305±0.229  | 4.42E-04 |
| cg14987922  | 2 | 37194071 | TSS1500                   | <i>STRN</i>         | -5.046±0.384 | -5.362±0.576 | 9.12E-04 |
| cg15556558  | 2 | 37194356 | TSS1500                   | <i>STRN</i>         | -5.149±0.514 | -5.616±0.463 | 5.85E-05 |
| cg03392046  | 2 | 37311658 | GeneBody/5'UTR/1st exon   | <i>GPATCH11</i>     | -3.082±0.262 | -3.239±0.266 | 6.08E-03 |
| cg19931106  | 2 | 37311892 | GeneBody/1st intron       | <i>GPATCH11</i>     | -4.902±0.648 | -5.318±0.759 | 4.59E-03 |
| cg25458920  | 2 | 37383713 | GeneBody/5'UTR/1st intron | <i>EIF2AK2</i>      | -3.894±0.502 | -4.274±0.605 | 1.04E-03 |
| cg24022829  | 2 | 37384227 | TSS200                    | <i>EIF2AK2</i>      | -5.89±0.455  | -6.229±0.443 | 7.51E-04 |
| cg05257610  | 2 | 37457596 | GeneBody/1st intron       | <i>CEBPZ</i>        | -1.352±0.405 | -1.086±0.522 | 4.74E-03 |
| cg18630855  | 2 | 37459194 | GeneBody/1st intron       | <i>NDUFAF7</i>      | -5.655±0.536 | -5.988±0.511 | 4.04E-03 |
| cg01936270  | 2 | 38303680 | TSS1500                   | <i>CYP1B1</i>       | -4.651±0.428 | -4.917±0.342 | 3.14E-03 |
| cg09198463  | 2 | 38603570 | GeneBody/1st intron       | <i>ATL2</i>         | -4.633±0.329 | -5.019±0.624 | 3.21E-05 |
| cg20091107  | 2 | 38604853 | TSS1500                   | <i>ATL2</i>         | -6.092±0.555 | -6.478±0.569 | 1.69E-03 |
| cg01746088  | 2 | 38978194 | GeneBody/1st intron       | <i>SRSF7</i>        | -5.001±0.393 | -5.251±0.315 | 2.61E-03 |
| cg18676393  | 2 | 39005264 | TSS200                    | <i>GEMIN6</i>       | -4.687±0.513 | -5.084±0.501 | 5.08E-04 |
| cg07959896  | 2 | 39005451 | GeneBody/5'UTR/1st intron | <i>GEMIN6</i>       | -4.654±0.422 | -5.084±0.6   | 4.66E-05 |
| cg19559392  | 2 | 39103372 | GeneBody/5'UTR/1st intron | <i>MORN2</i>        | -4.781±0.339 | -5.271±0.47  | 1.11E-07 |
| cg13412063  | 2 | 39347277 | GeneBody/1st intron       | <i>SOS1</i>         | -5.691±0.516 | -6.162±0.493 | 6.28E-05 |
| cg27074297  | 2 | 39348117 | TSS1500                   | <i>SOS1</i>         | -5.789±0.45  | -6.183±0.47  | 1.34E-04 |
| cg16273524  | 2 | 40066334 | GeneBody/1st exon         | <i>THUMPD2</i>      | -5.135±0.602 | -5.458±0.472 | 9.82E-03 |
| cg20224517  | 2 | 40066561 | TSS200                    | <i>THUMPD2</i>      | -3.451±0.248 | -3.727±0.347 | 1.11E-05 |
| cg06043190  | 2 | 42396882 | GeneBody/1st intron       | <i>EML4</i>         | -4.783±0.563 | -5.188±0.537 | 1.06E-03 |
| cg02278165  | 2 | 42588618 | TSS1500                   | <i>COX7A2L</i>      | -4.991±0.676 | -5.568±0.573 | 1.21E-04 |
| cg05607127  | 2 | 42721581 | TSS1500                   | <i>KCNQ3</i>        | -4.081±0.268 | -4.293±0.324 | 6.30E-04 |
| cg14840416  | 2 | 43453324 | GeneBody/1st intron       | <i>ZFP36L2</i>      | -4.462±0.473 | -4.773±0.469 | 2.63E-03 |
| cg00097536  | 2 | 43454476 | GeneBody/1st exon         | <i>LOC100129726</i> | -5.014±0.331 | -5.253±0.334 | 1.11E-03 |
| cg141120336 | 2 | 44001158 | TSS200                    | <i>DYNC2LI1</i>     | -4.258±0.432 | -4.569±0.533 | 1.83E-03 |
| cg14059475  | 2 | 44588633 | GeneBody/5'UTR/1st exon   | <i>PREPL</i>        | -5.444±0.628 | -5.961±0.646 | 2.79E-04 |
| cg20655010  | 2 | 44589154 | GeneBody/1st exon         | <i>CAMKMT</i>       | -5.513±0.461 | -5.883±0.467 | 3.70E-04 |
| cg14832358  | 2 | 45837811 | GeneBody/5'UTR/1st intron | <i>SRBD1</i>        | -4.673±0.474 | -5.018±0.416 | 8.07E-04 |
| cg05890578  | 2 | 45877647 | TSS1500                   | <i>PRKCE</i>        | -4.678±0.454 | -5.047±0.472 | 3.26E-04 |
| cg11476211  | 2 | 45879284 | GeneBody/1st exon         | <i>PRKCE</i>        | -4.97±0.356  | -5.344±0.508 | 3.07E-05 |
| cg01780482  | 2 | 46524612 | GeneBody/5'UTR/1st exon   | <i>EPAS1</i>        | -5.414±0.564 | -5.796±0.487 | 1.59E-03 |
| cg20449833  | 2 | 46770299 | GeneBody/1st exon         | <i>RHOQ</i>         | -4.909±0.315 | -5.256±0.63  | 1.18E-04 |
| cg08813236  | 2 | 46844324 | GeneBody/5'UTR/1st exon   | <i>CRIP1</i>        | -4.498±0.222 | -4.875±0.415 | 2.47E-08 |
| cg06386533  | 2 | 46925753 | TSS1500                   | <i>SOC5</i>         | -5.624±0.458 | -6.116±0.448 | 6.27E-06 |
| cg07897193  | 2 | 46926272 | TSS200                    | <i>SOC5</i>         | -4.979±0.281 | -5.46±0.522  | 2.09E-08 |
| cg14126210  | 2 | 47142867 | GeneBody/5'UTR/1st exon   | <i>MCFD2</i>        | -5.311±0.481 | -5.641±0.502 | 1.96E-03 |
| cg20697204  | 2 | 47382593 | TSS200                    | <i>C2orf61</i>      | 1.145±0.297  | 1.354±0.312  | 1.56E-03 |
| cg19536127  | 2 | 47404286 | TSS1500                   | <i>CALM2</i>        | -4.871±0.331 | -5.089±0.322 | 2.47E-03 |
| cg17129141  | 2 | 47629949 | TSS1500                   | <i>MSH2</i>         | -3.924±0.191 | -4.09±0.33   | 9.06E-04 |
| cg27138584  | 2 | 47796781 | GeneBody/1st intron       | <i>KCNK12</i>       | -3.59±0.301  | -3.884±0.442 | 9.99E-05 |
| cg02905881  | 2 | 48009730 | TSS1500                   | <i>MSH6</i>         | -4.399±0.419 | -4.739±0.638 | 1.08E-03 |
| cg04495969  | 2 | 48132005 | GeneBody/1st intron       | <i>FBXO11</i>       | -5.042±0.386 | -5.443±0.404 | 1.19E-05 |
| cg15846641  | 2 | 48541264 | TSS1500                   | <i>FOXN2</i>        | -5.079±0.465 | -5.431±0.45  | 6.15E-04 |
| cg00539716  | 2 | 48541921 | GeneBody/5'UTR/1st exon   | <i>FOXN2</i>        | -3.565±0.215 | -3.773±0.343 | 1.74E-04 |
| cg14059729  | 2 | 48667654 | TSS1500                   | <i>PPP1R21</i>      | -5.58±0.382  | -5.846±0.36  | 1.45E-03 |
| cg04826422  | 2 | 48667825 | TSS200                    | <i>PPP1R21</i>      | -5.031±0.423 | -5.372±0.437 | 3.65E-04 |
| cg14698961  | 2 | 48667887 | TSS200                    | <i>PPP1R21</i>      | -4.75±0.589  | -5.445±0.726 | 2.66E-06 |
| cg15796978  | 2 | 48982509 | GeneBody/1st intron       | <i>LHCGR</i>        | -3.02±0.243  | -3.356±0.38  | 5.67E-07 |
| cg13467814  | 2 | 54013395 | GeneBody/5'UTR/1st intron | <i>ASB3</i>         | -4.328±0.447 | -4.757±0.462 | 3.73E-05 |
| cg01615080  | 2 | 54342584 | GeneBody/5'UTR/1st exon   | <i>ACYP2</i>        | -3.435±0.262 | -3.613±0.356 | 4.19E-03 |

|            |   |          |                           |                 |              |              |          |
|------------|---|----------|---------------------------|-----------------|--------------|--------------|----------|
| cg23539966 | 2 | 55277621 | GeneBody/5'UTR/1st exon   | <i>RTN4</i>     | -5.695±0.713 | -6.195±0.586 | 1.08E-03 |
| cg27069263 | 2 | 55278118 | TSS1500                   | <i>RTN4</i>     | -4.272±0.677 | -4.688±0.666 | 4.65E-03 |
| cg15587603 | 2 | 55460405 | GeneBody/1st intron       | <i>RPS27A</i>   | -4.404±0.578 | -4.735±0.494 | 6.72E-03 |
| cg10455676 | 2 | 55496384 | GeneBody/5'UTR/1st exon   | <i>MTIF2</i>    | -4.61±0.393  | -4.997±0.532 | 6.12E-05 |
| cg20497627 | 2 | 55496490 | TSS200                    | <i>MTIF2</i>    | -5.737±0.633 | -6.195±0.462 | 6.71E-04 |
| cg16750914 | 2 | 55646622 | GeneBody/5'UTR/1st exon   | <i>CCDC88A</i>  | -4.946±0.343 | -5.31±0.517  | 3.39E-05 |
| cg15971836 | 2 | 55647419 | TSS1500                   | <i>CCDC88A</i>  | -4.439±0.333 | -4.715±0.41  | 4.02E-04 |
| cg17158059 | 2 | 55746762 | GeneBody/5'UTR/1st exon   | <i>CCDC104</i>  | -4.32±0.263  | -4.559±0.393 | 2.65E-04 |
| cg09685747 | 2 | 55920781 | GeneBody/1st intron       | <i>PNPT1</i>    | -4.406±0.527 | -4.761±0.539 | 2.24E-03 |
| cg18811423 | 2 | 55921094 | TSS200                    | <i>PNPT1</i>    | -4.491±0.484 | -4.818±0.552 | 2.79E-03 |
| cg26093711 | 2 | 58273654 | TSS200                    | <i>VRK2</i>     | -4.697±0.391 | -5.062±0.53  | 1.28E-04 |
| cg15309264 | 2 | 58274034 | GeneBody/5'UTR/1st intron | <i>VRK2</i>     | -3.391±0.161 | -3.633±0.348 | 1.45E-06 |
| cg10174864 | 2 | 58468631 | TSS200                    | <i>FANCL</i>    | -3.906±0.419 | -4.16±0.468  | 6.60E-03 |
| cg04557868 | 2 | 61107981 | GeneBody/1st intron       | <i>FLJ16341</i> | -4.078±0.628 | -4.486±0.59  | 2.64E-03 |
| cg09600437 | 2 | 61109155 | GeneBody/1st intron       | <i>REL</i>      | -4.734±0.506 | -5.138±0.444 | 2.89E-04 |
| cg09469394 | 2 | 61243988 | TSS1500                   | <i>PEX13</i>    | -4.687±0.437 | -5.012±0.527 | 1.26E-03 |
| cg01439983 | 2 | 61243993 | TSS1500                   | <i>PEX13</i>    | -4.543±0.478 | -4.813±0.475 | 9.10E-03 |
| cg11736869 | 2 | 61245136 | GeneBody/5'UTR/1st intron | <i>PUS10</i>    | -2.387±0.331 | -2.128±0.513 | 1.75E-03 |
| cg24053619 | 2 | 61293272 | TSS200                    | <i>KIAA1841</i> | -5.527±0.637 | -5.933±0.564 | 2.90E-03 |
| cg20843052 | 2 | 61293725 | GeneBody/5'UTR/1st intron | <i>KIAA1841</i> | -3.902±0.218 | -4.105±0.321 | 1.82E-04 |
| cg07290273 | 2 | 62733114 | GeneBody/1st intron       | <i>TMEM17</i>   | -4.705±0.443 | -5.04±0.482  | 8.33E-04 |
| cg14101501 | 2 | 62932430 | TSS1500                   | <i>EHBP1</i>    | -5.282±0.577 | -5.833±0.478 | 2.68E-05 |
| cg26239051 | 2 | 62933278 | GeneBody/5'UTR/1st intron | <i>EHBP1</i>    | -5.043±0.498 | -5.346±0.511 | 5.50E-03 |
| cg26260350 | 2 | 63277932 | TSS200                    | <i>OTX1</i>     | -4.472±0.523 | -4.936±0.461 | 7.97E-05 |
| cg19147570 | 2 | 63815760 | GeneBody/5'UTR/1st exon   | <i>MDH1</i>     | -3.677±0.307 | -3.859±0.367 | 9.27E-03 |
| cg16527805 | 2 | 63816164 | TSS200                    | <i>MDH1</i>     | -4.367±0.284 | -4.569±0.288 | 1.32E-03 |
| cg03055492 | 2 | 64068493 | GeneBody/5'UTR/1st intron | <i>UGP2</i>     | -5.788±0.649 | -6.286±0.562 | 4.55E-04 |
| cg01739965 | 2 | 64246297 | TSS200                    | <i>VPS54</i>    | -4.557±0.435 | -4.89±0.529  | 9.54E-04 |
| cg12691366 | 2 | 64681733 | GeneBody/1st intron       | <i>LGALS1</i>   | -6.505±0.609 | -6.996±0.67  | 4.18E-04 |
| cg23854921 | 2 | 64751325 | TSS200                    | <i>AFTPH</i>    | -6.086±0.487 | -6.676±0.541 | 1.22E-06 |
| cg10423227 | 2 | 64752200 | TSS1500                   | <i>MIR4434</i>  | -4.912±0.373 | -5.19±0.371  | 7.95E-04 |
| cg04576855 | 2 | 64880738 | GeneBody/5'UTR/1st intron | <i>SERTAD2</i>  | -5.295±0.473 | -5.709±0.624 | 2.70E-04 |
| cg22521310 | 2 | 64881850 | TSS1500                   | <i>SERTAD2</i>  | -3.916±0.366 | -4.178±0.592 | 4.51E-03 |
| cg00877964 | 2 | 65215638 | GeneBody/5'UTR/1st exon   | <i>SLC1A4</i>   | -4.713±0.393 | -5.031±0.356 | 2.63E-04 |
| cg23816572 | 2 | 65283421 | TSS200                    | <i>CEP68</i>    | -5.716±0.498 | -6.056±0.521 | 2.04E-03 |
| cg05010058 | 2 | 65284262 | GeneBody/5'UTR/1st intron | <i>CEP68</i>    | -3.8±0.444   | -4.18±0.461  | 1.75E-04 |
| cg14217102 | 2 | 65357592 | TSS200                    | <i>RAB1A</i>    | -5.381±0.467 | -5.778±0.6   | 3.58E-04 |
| cg11585425 | 2 | 65454529 | TSS1500                   | <i>ACTR2</i>    | -5.287±0.364 | -5.558±0.455 | 1.33E-03 |
| cg05098471 | 2 | 66662163 | TSS1500                   | <i>MEIS1</i>    | -5.085±0.408 | -5.388±0.443 | 9.82E-04 |
| cg12975220 | 2 | 66662585 | GeneBody/5'UTR/1st exon   | <i>MEIS1</i>    | -4.77±0.363  | -5.229±0.477 | 1.03E-06 |
| cg00054706 | 2 | 68289972 | GeneBody/5'UTR/1st intron | <i>C1D</i>      | -5.193±0.361 | -5.449±0.372 | 1.44E-03 |
| cg22628840 | 2 | 68384458 | GeneBody/1st intron       | <i>WDR92</i>    | -5.184±0.42  | -5.474±0.438 | 1.85E-03 |
| cg25488082 | 2 | 68384862 | TSS200                    | <i>PNO1</i>     | -4.4±0.269   | -4.557±0.273 | 7.48E-03 |
| cg04496615 | 2 | 68479620 | GeneBody/5'UTR/1st exon   | <i>PPP3R1</i>   | -5.596±0.402 | -5.934±0.638 | 8.73E-04 |
| cg18618964 | 2 | 68480222 | TSS1500                   | <i>PPP3R1</i>   | -4.674±0.387 | -4.898±0.408 | 8.42E-03 |
| cg10908369 | 2 | 68547256 | TSS200                    | <i>CNRIP1</i>   | -3.841±0.329 | -4.2±0.461   | 1.55E-05 |
| cg08646988 | 2 | 69614274 | GeneBody/5'UTR/1st exon   | <i>GFPT1</i>    | -5.305±0.438 | -5.823±0.686 | 7.63E-06 |
| cg01272601 | 2 | 69871685 | TSS1500                   | <i>AAK1</i>     | -4.311±0.398 | -4.579±0.468 | 3.07E-03 |
| cg05155595 | 2 | 70008161 | GeneBody/5'UTR/1st intron | <i>ANXA4</i>    | -0.28±0.249  | -0.084±0.338 | 1.02E-03 |
| cg14452789 | 2 | 70056602 | TSS1500                   | <i>GMCL1</i>    | -5.578±0.458 | -6.093±0.585 | 6.58E-06 |
| cg10773869 | 2 | 70057052 | GeneBody/1st exon         | <i>GMCL1</i>    | -5.729±0.483 | -6.121±0.53  | 3.81E-04 |
| cg01639256 | 2 | 70189903 | TSS1500                   | <i>ASPRV1</i>   | 3.273±0.168  | 3.434±0.299  | 3.29E-04 |
| cg24727568 | 2 | 70315011 | GeneBody/1st exon         | <i>PCBP1</i>    | -4.584±0.301 | -4.81±0.307  | 7.71E-04 |
| cg17189058 | 2 | 70418126 | GeneBody/5'UTR/1st exon   | <i>C2orf42</i>  | -5.696±0.567 | -6.147±0.516 | 3.26E-04 |
| cg04589975 | 2 | 70418186 | TSS200                    | <i>C2orf42</i>  | -5.777±0.459 | -6.211±0.469 | 4.46E-05 |
| cg09658342 | 2 | 70476000 | TSS1500                   | <i>TIA1</i>     | -4.348±0.64  | -4.744±0.671 | 4.91E-03 |
| cg18865999 | 2 | 70485303 | GeneBody/1st exon         | <i>PCYOX1</i>   | -5.166±0.415 | -5.575±0.557 | 5.96E-05 |
| cg23233234 | 2 | 70528859 | GeneBody/1st intron       | <i>FAM136A</i>  | -5.901±0.487 | -6.236±0.626 | 3.16E-03 |
| cg11808874 | 2 | 70529494 | TSS1500                   | <i>FAM136A</i>  | 1.096±0.161  | 1.201±0.167  | 3.03E-03 |
| cg07004820 | 2 | 70780451 | GeneBody/1st intron       | <i>TGFA</i>     | -4.174±0.317 | -4.4±0.316   | 1.27E-03 |
| cg22425806 | 2 | 70781576 | TSS1500                   | <i>TGFA</i>     | -3.524±0.244 | -3.769±0.338 | 5.22E-05 |
| cg23513644 | 2 | 71357140 | GeneBody/1st intron       | <i>MCEE</i>     | -6.157±0.651 | -6.596±0.562 | 1.70E-03 |
| cg15253672 | 2 | 73114960 | GeneBody/1st intron       | <i>SPR</i>      | -4.668±0.342 | -5.029±0.431 | 1.68E-05 |
| cg03856450 | 2 | 73298881 | GeneBody/5'UTR/1st exon   | <i>SFXN5</i>    | -4.798±0.358 | -5.138±0.533 | 1.57E-04 |
| cg03077062 | 2 | 73299091 | TSS200                    | <i>SFXN5</i>    | -5.222±0.446 | -5.67±0.574  | 3.75E-05 |
| cg17895873 | 2 | 73441412 | GeneBody/1st exon         | <i>SMYD5</i>    | -5.299±0.443 | -5.604±0.578 | 3.27E-03 |
| cg26993951 | 2 | 73459854 | GeneBody/1st intron       | <i>PRADC1</i>   | -3.488±0.249 | -3.721±0.443 | 4.60E-04 |
| cg06642617 | 2 | 73461528 | GeneBody/5'UTR/1st intron | <i>CCT7</i>     | -6.412±0.564 | -7.043±0.634 | 4.60E-06 |
| cg21111868 | 2 | 73521089 | TSS1500                   | <i>EGR4</i>     | -3.359±0.266 | -3.565±0.483 | 3.62E-03 |
| cg09172980 | 2 | 73870174 | TSS1500                   | <i>NAT8</i>     | -1.406±0.169 | -1.574±0.287 | 1.66E-04 |
| cg08116137 | 2 | 73870653 | TSS1500                   | <i>NAT8</i>     | -1.863±0.269 | -2.039±0.317 | 3.77E-03 |
| cg21896452 | 2 | 73964413 | GeneBody/5'UTR/1st intron | <i>TPRKB</i>    | -4.912±0.506 | -5.248±0.487 | 2.27E-03 |
| cg11251086 | 2 | 74007147 | GeneBody/1st exon         | <i>DUSP11</i>   | -4.725±0.506 | -5.078±0.52  | 1.63E-03 |
| cg10373645 | 2 | 74007265 | GeneBody/5'UTR/1st exon   | <i>DUSP11</i>   | -4.689±0.513 | -5.091±0.533 | 4.93E-04 |
| cg26809210 | 2 | 74056290 | GeneBody/5'UTR/1st exon   | <i>STAMBP</i>   | -4.743±0.452 | -5.186±0.39  | 1.96E-05 |
| cg03839972 | 2 | 74153800 | TSS200                    | <i>DGUOK</i>    | -3.107±0.352 | -3.382±0.472 | 1.01E-03 |
| cg22544376 | 2 | 74154016 | GeneBody/5'UTR/1st exon   | <i>DGUOK</i>    | -5.569±0.546 | -5.974±0.592 | 9.73E-04 |
| cg08434152 | 2 | 74405770 | GeneBody/1st intron       | <i>MOB1A</i>    | -5.141±0.525 | -5.593±0.502 | 1.35E-04 |
| cg06391660 | 2 | 74608183 | TSS1500                   | <i>DCTN1</i>    | 2.952±0.177  | 3.111±0.192  | 1.09E-04 |
| cg10491648 | 2 | 74648490 | TSS1500                   | <i>WDR54</i>    | -4.124±0.27  | -4.392±0.376 | 6.29E-05 |
| cg03490115 | 2 | 74681972 | TSS200                    | <i>INO80B</i>   | -4.658±0.481 | -5.084±0.546 | 1.37E-04 |
| cg22996555 | 2 | 74692183 | GeneBody/1st exon         | <i>MOGS</i>     | -5.7±0.52    | -6.134±0.708 | 5.38E-04 |
| cg19324027 | 2 | 74699582 | GeneBody                  | <i>MRPL53</i>   | -3.992±0.296 | -4.351±0.375 | 1.76E-06 |
| cg02154074 | 2 | 74756234 | TSS1500                   | <i>HTRA2</i>    | -4.689±0.465 | -5.077±0.463 | 2.17E-04 |
| cg18181070 | 2 | 74756634 | GeneBody/5'UTR/1st exon   | <i>HTRA2</i>    | -4.091±0.304 | -4.387±0.49  | 1.72E-04 |
| cg04576203 | 2 | 74757825 | TSS1500                   | <i>AUP1</i>     | -4.86±0.39   | -5.142±0.387 | 1.08E-03 |
| cg04755933 | 2 | 74757881 | TSS1500                   | <i>AUP1</i>     | -4.168±0.316 | -4.39±0.548  | 6.89E-03 |
| cg26117023 | 2 | 74782096 | GeneBody/1st intron       | <i>DOK1</i>     | -4.949±0.257 | -5.253±0.458 | 1.73E-05 |
| cg19401923 | 2 | 75873790 | TSS200                    | <i>MRPL19</i>   | -4.909±0.363 | -5.257±0.511 | 1.05E-04 |
| cg17043155 | 2 | 75873919 | GeneBody/5'UTR/1st exon   | <i>MRPL19</i>   | -4.829±0.386 | -5.126±0.47  | 9.18E-04 |
| cg04053638 | 2 | 84686387 | GeneBody/1st exon         | <i>SUCLG1</i>   | -5.346±0.537 | -5.83±0.473  | 6.51E-05 |
| cg00396163 | 2 | 84743584 | GeneBody/5'UTR/1st exon   | <i>DNAH6</i>    | -4.565±0.484 | -4.873±0.668 | 7.26E-03 |
| cg00954003 | 2 | 85132392 | TSS1500                   | <i>TMSB10</i>   | -6.054±0.635 | -6.528±0.555 | 6.16E-04 |
| cg14542238 | 2 | 85555574 | TSS200                    | <i>TGOLN2</i>   | -4.628±0.333 | -4.912±0.473 | 4.75E-04 |
| cg00014085 | 2 | 85581505 | GeneBody/1st exon         | <i>RETSAT</i>   | -5.208±0.58  | -5.618±0.543 | 1.25E-03 |

|            |   |           |                           |              |              |              |          |
|------------|---|-----------|---------------------------|--------------|--------------|--------------|----------|
| cg24341220 | 2 | 85581729  | GeneBody/5'UTR/1st exon   | RETSAT       | -4.859±0.343 | -5.08±0.344  | 3.26E-03 |
| cg04881903 | 2 | 85637116  | GeneBody/5'UTR/1st intron | CAPG         | 0.859±0.276  | 1.037±0.33   | 4.50E-03 |
| cg00696900 | 2 | 85767031  | GeneBody/1st intron       | MAT2A        | -4.83±0.373  | -5.134±0.612 | 1.46E-03 |
| cg10506212 | 2 | 85788810  | TSS200                    | GGCX         | -5.404±0.367 | -5.742±0.364 | 6.02E-05 |
| cg24286767 | 2 | 85822592  | TSS1500                   | RNF181       | -5.429±0.425 | -5.741±0.424 | 9.17E-04 |
| cg23667407 | 2 | 85822980  | GeneBody/1st intron       | RNF181       | -5.018±0.571 | -5.494±0.54  | 1.94E-04 |
| cg19376794 | 2 | 85843782  | GeneBody/1st intron       | USP39        | -4.476±0.409 | -4.788±0.589 | 1.68E-03 |
| cg15649452 | 2 | 85981006  | GeneBody/5'UTR/1st exon   | ATOH8        | -4.335±0.18  | -4.46±0.259  | 3.95E-03 |
| cg18763191 | 2 | 86115509  | GeneBody/1st intron       | ST3GAL5      | -4.595±0.305 | -4.953±0.512 | 1.31E-05 |
| cg01040759 | 2 | 86116384  | TSS1500                   | ST3GAL5      | -3.771±0.309 | -4.128±0.401 | 4.49E-06 |
| cg08229694 | 2 | 86422197  | GeneBody/1st intron       | IMMT         | -5.563±0.56  | -6.032±0.674 | 3.35E-04 |
| cg21037570 | 2 | 86422857  | GeneBody/5'UTR/1st exon   | IMMT         | -4.479±0.367 | -4.889±0.442 | 5.90E-06 |
| cg15645605 | 2 | 86426467  | TSS200                    | MRPL35       | -4.77±0.407  | -5.324±0.543 | 2.73E-07 |
| cg11820734 | 2 | 86426725  | GeneBody/1st intron       | MRPL35       | -4.694±0.527 | -5.043±0.397 | 1.69E-03 |
| cg20918903 | 2 | 86668501  | TSS200                    | KDM3A        | -4.795±0.601 | -5.199±0.468 | 1.51E-03 |
| cg26245011 | 2 | 86947869  | GeneBody/5'UTR/1st intron | RNF103-CHMP3 | -5.818±0.502 | -6.214±0.475 | 3.91E-04 |
| cg08305742 | 2 | 88354927  | GeneBody/5'UTR/1st intron | KRCC1        | -4.077±0.272 | -4.292±0.555 | 5.07E-03 |
| cg26900034 | 2 | 88355166  | GeneBody/5'UTR/1st exon   | KRCC1        | -3.362±0.531 | -3.723±0.648 | 3.11E-03 |
| cg11142466 | 2 | 88355481  | TSS1500                   | KRCC1        | -4.71±0.433  | -5.027±0.4   | 8.37E-04 |
| cg06358566 | 2 | 88991375  | GeneBody/1st exon         | RPIA         | -4.627±0.226 | -4.766±0.263 | 6.30E-03 |
| cg01150454 | 2 | 95787883  | TSS200                    | MRPS5        | -5.835±0.452 | -6.236±0.484 | 1.17E-04 |
| cg20775254 | 2 | 95940705  | GeneBody/1st intron       | PROM2        | 1.242±0.22   | 1.392±0.232  | 2.12E-03 |
| cg08818385 | 2 | 96067685  | TSS1500                   | FAHD2A       | -1.126±0.324 | -0.831±0.426 | 1.59E-04 |
| cg16282101 | 2 | 96068839  | GeneBody/5'UTR/1st intron | FAHD2A       | -4.708±0.402 | -5.182±0.496 | 2.64E-06 |
| cg15495837 | 2 | 96256880  | TSS1500                   | TRIM43       | 2.381±0.196  | 2.499±0.257  | 9.76E-03 |
| cg15884411 | 2 | 96932403  | GeneBody/1st intron       | CIAO1        | -4.848±0.329 | -5.226±0.476 | 8.28E-06 |
| cg10688941 | 2 | 96971181  | GeneBody/5'UTR/1st exon   | SNRNP200     | -4.711±0.571 | -5.073±0.56  | 3.55E-03 |
| cg26625319 | 2 | 97001960  | GeneBody/1st intron       | NCAPH        | -5.404±0.35  | -5.664±0.341 | 7.75E-04 |
| cg01990225 | 2 | 97406019  | TSS1500                   | LMAN2L       | -3.044±0.465 | -3.56±0.645  | 1.12E-05 |
| cg00711916 | 2 | 97426274  | TSS1500                   | CNNM4        | -3.735±0.264 | -3.895±0.235 | 4.46E-03 |
| cg11158729 | 2 | 97427027  | GeneBody/1st exon         | CNNM4        | -4.469±0.367 | -4.742±0.464 | 1.45E-03 |
| cg15157837 | 2 | 97482059  | GeneBody/1st exon         | CNNM3        | -5.46±0.544  | -5.876±0.594 | 7.29E-04 |
| cg25162794 | 2 | 97509831  | TSS200                    | ANKRD23      | 2.387±0.17   | 2.495±0.192  | 4.58E-03 |
| cg23248865 | 2 | 97535578  | GeneBody/5'UTR/1st intron | SEMA4C       | -5.118±0.557 | -5.681±0.658 | 2.56E-05 |
| cg23089298 | 2 | 97536097  | TSS1500                   | SEMA4C       | -4.72±0.256  | -5.089±0.456 | 6.16E-07 |
| cg25807810 | 2 | 97760817  | TSS1500                   | FAHD2B       | -5.415±0.494 | -5.687±0.426 | 9.04E-03 |
| cg01628803 | 2 | 98126764  | GeneBody                  | ANKRD36B     | -0.317±0.134 | -0.415±0.207 | 3.18E-03 |
| cg01568335 | 2 | 98262245  | TSS1500                   | COX5B        | -4.06±0.297  | -4.3±0.434   | 9.74E-04 |
| cg05720937 | 2 | 98280362  | GeneBody/5'UTR/1st exon   | ACTR1B       | -5.546±0.533 | -5.975±0.565 | 3.85E-04 |
| cg23123262 | 2 | 98280693  | TSS200                    | ACTR1B       | -4.998±0.424 | -5.468±0.554 | 8.81E-06 |
| cg01169610 | 2 | 99135471  | GeneBody/5'UTR            | INPP4A       | 2.033±0.308  | 2.22±0.368   | 7.16E-03 |
| cg13744304 | 2 | 99224764  | GeneBody/1st intron       | COA5         | -6.072±0.596 | -6.409±0.523 | 7.53E-03 |
| cg25411534 | 2 | 99758462  | GeneBody/5'UTR/1st intron | C2orf15      | -4.369±0.405 | -4.711±0.529 | 3.95E-04 |
| cg01651821 | 2 | 99797358  | GeneBody/1st exon         | MITD1        | -5.124±0.741 | -5.609±0.632 | 2.18E-03 |
| cg14962548 | 2 | 99952717  | GeneBody/5'UTR/1st exon   | TXNDC9       | -5.065±0.329 | -5.314±0.475 | 1.80E-03 |
| cg12554819 | 2 | 100106981 | TSS1500                   | REV1         | -5.282±0.451 | -5.58±0.444  | 2.45E-03 |
| cg03853987 | 2 | 101034279 | TSS200                    | CHST10       | -3.457±0.453 | -3.887±0.436 | 3.74E-05 |
| cg07799947 | 2 | 101436171 | TSS1500                   | NPAS2        | -1.227±0.115 | -1.314±0.178 | 2.41E-03 |
| cg25853833 | 2 | 101869024 | TSS1500                   | CNOT11       | -4.723±0.349 | -5.076±0.471 | 4.30E-05 |
| cg12293634 | 2 | 101924667 | GeneBody/1st exon         | RNF149       | -5.311±0.382 | -5.664±0.529 | 1.57E-04 |
| cg04532229 | 2 | 103235411 | TSS1500                   | SLC9A2       | -5.117±0.512 | -5.474±0.49  | 1.42E-03 |
| cg13948784 | 2 | 103353092 | GeneBody/1st intron       | MFSO9        | -5.599±0.448 | -5.907±0.485 | 2.06E-03 |
| cg17997329 | 2 | 103353471 | TSS200                    | MFSO9        | -3.69±0.19   | -3.973±0.384 | 9.60E-07 |
| cg09738100 | 2 | 105654422 | TSS200                    | MRPS9        | -4.858±0.373 | -5.199±0.479 | 1.42E-04 |
| cg23641648 | 2 | 105654651 | GeneBody/1st exon         | MRPS9        | -5.07±0.286  | -5.326±0.294 | 9.60E-05 |
| cg18235146 | 2 | 105954150 | GeneBody/1st intron       | C2orf49      | -4.919±0.307 | -5.17±0.263  | 2.11E-04 |
| cg12287813 | 2 | 109065726 | GeneBody/5'UTR/1st exon   | GCC2         | -4.324±0.22  | -4.485±0.235 | 1.06E-03 |
| cg08733774 | 2 | 109335627 | TSS1500                   | RANBP2       | -4.122±0.493 | -4.428±0.509 | 4.70E-03 |
| cg08028004 | 2 | 109336023 | GeneBody/5'UTR/1st exon   | RANBP2       | -2.133±0.368 | -1.7±0.45    | 2.67E-06 |
| cg25741319 | 2 | 109402933 | TSS1500                   | CCDC138      | -4.581±0.567 | -5.016±0.54  | 5.23E-04 |
| cg15605888 | 2 | 109403293 | GeneBody/1st exon         | CCDC138      | -4.768±0.587 | -5.218±0.546 | 5.06E-04 |
| cg26309498 | 2 | 109607038 | TSS1500                   | EDAR         | 2.21±0.259   | 2±0.382      | 9.54E-04 |
| cg18879041 | 2 | 110656797 | GeneBody/1st intron       | LIMS3L       | 1.039±0.268  | 0.798±0.298  | 1.07E-04 |
| cg08229627 | 2 | 110962613 | GeneBody/5'UTR/1st exon   | NPHP1        | -5.093±0.446 | -5.404±0.462 | 1.68E-03 |
| cg27210766 | 2 | 111435943 | TSS1500                   | BUB1         | -4.71±0.438  | -5.019±0.518 | 1.97E-03 |
| cg15585905 | 2 | 112641726 | GeneBody/5'UTR/1st exon   | ANAPC1       | -5.283±0.506 | -5.692±0.615 | 5.36E-04 |
| cg11700429 | 2 | 112641892 | TSS200                    | ANAPC1       | -6.139±0.522 | -6.66±0.521  | 2.01E-05 |
| cg21182454 | 2 | 112656262 | GeneBody/5'UTR/1st exon   | MERTK        | -5.218±0.476 | -5.639±0.604 | 2.08E-04 |
| cg10216105 | 2 | 113239349 | TSS1500                   | TTL          | -4.81±0.577  | -5.273±0.6   | 3.83E-04 |
| cg19061982 | 2 | 113299409 | TSS200                    | POLR1B       | -4.83±0.379  | -5.223±0.38  | 1.12E-05 |
| cg17009717 | 2 | 113299708 | GeneBody/5'UTR/1st exon   | POLR1B       | -3.037±0.146 | -3.188±0.264 | 1.44E-04 |
| cg24651706 | 2 | 113341872 | TSS200                    | CHCHD5       | -4.512±0.343 | -4.765±0.424 | 1.42E-03 |
| cg05672265 | 2 | 113403002 | TSS1500                   | SLC20A1      | -4.665±0.334 | -4.996±0.461 | 6.05E-05 |
| cg10762132 | 2 | 113403533 | GeneBody/5'UTR/1st exon   | SLC20A1      | -5.863±0.579 | -6.355±0.568 | 1.67E-04 |
| cg14899547 | 2 | 113521923 | GeneBody/1st intron       | CKAP2L       | -5.215±0.399 | -5.704±0.531 | 1.89E-06 |
| cg06505666 | 2 | 113522377 | TSS200                    | CKAP2L       | -4.785±0.324 | -5.187±0.499 | 3.14E-06 |
| cg11783497 | 2 | 113875292 | TSS200                    | IL1RN        | 1.035±0.328  | 1.221±0.325  | 8.98E-03 |
| cg26560960 | 2 | 114195306 | GeneBody/5'UTR/1st exon   | CBWD2        | -4.178±0.226 | -4.397±0.346 | 1.40E-04 |
| cg22717127 | 2 | 114195430 | GeneBody/5'UTR/1st exon   | CBWD2        | -5.397±0.432 | -6.092±0.636 | 1.48E-08 |
| cg26540127 | 2 | 114647103 | TSS1500                   | ACTR3        | -4.461±0.289 | -4.791±0.381 | 5.86E-06 |
| cg25593040 | 2 | 118572325 | GeneBody/5'UTR/1st exon   | DDX18        | -4.829±0.489 | -5.221±0.445 | 2.89E-04 |
| cg05944800 | 2 | 118845546 | TSS1500                   | INSIG2       | -4.111±0.503 | -4.448±0.546 | 2.70E-03 |
| cg04195527 | 2 | 118846289 | GeneBody/5'UTR/1st intron | INSIG2       | -4.112±0.484 | -4.459±0.477 | 1.15E-03 |
| cg03266453 | 2 | 119606055 | TSS1500                   | EN1          | -3.034±0.318 | -3.236±0.395 | 5.83E-03 |
| cg12323894 | 2 | 120124007 | GeneBody/5'UTR/1st exon   | C2orf76      | -4.189±0.329 | -4.524±0.464 | 4.68E-05 |
| cg21085625 | 2 | 120124643 | GeneBody/5'UTR/1st intron | DBI          | -5.003±0.367 | -5.414±0.353 | 3.17E-06 |
| cg15250797 | 2 | 120281526 | GeneBody/1st intron       | SCTR         | -2.64±0.353  | -2.415±0.288 | 2.66E-03 |
| cg22580372 | 2 | 120436899 | GeneBody/5'UTR/1st exon   | TMEM177      | -5.25±0.354  | -5.48±0.485  | 6.10E-03 |
| cg22730357 | 2 | 122051754 | GeneBody/5'UTR/1st exon   | PTPN4        | -5.312±0.317 | -5.586±0.358 | 1.87E-04 |
| cg14287603 | 2 | 120771169 | GeneBody/5'UTR/1st exon   | EPB41L5      | -4.125±0.317 | -4.362±0.441 | 1.77E-03 |
| cg02994216 | 2 | 121010979 | GeneBody/5'UTR/1st intron | RALB         | -5.627±0.576 | -6.098±0.496 | 2.08E-04 |
| cg09809242 | 2 | 122494874 | TSS1500                   | MKI67IP      | -4.416±0.485 | -4.811±0.525 | 3.58E-04 |
| cg01139059 | 2 | 122512988 | TSS200                    | TSN          | -3.593±0.228 | -3.75±0.232  | 1.76E-03 |
| cg13208492 | 2 | 122513376 | GeneBody/1st exon         | TSN          | -5.558±0.34  | -5.848±0.558 | 8.90E-04 |
| cg25457027 | 2 | 128175179 | TSS1500                   | PROC         | 3.43±0.213   | 3.654±0.315  | 3.53E-05 |

|            |   |           |                           |                     |              |              |          |
|------------|---|-----------|---------------------------|---------------------|--------------|--------------|----------|
| cg26718585 | 2 | 128176454 | GeneBody/5'UTR/1st intron | <i>PROC</i>         | 1.946±0.12   | 2.041±0.228  | 3.79E-03 |
| cg19311602 | 2 | 128284023 | GeneBody/5'UTR/1st exon   | <i>IWS1</i>         | -5.556±0.422 | -6.016±0.458 | 6.42E-06 |
| cg23570261 | 2 | 128284252 | TSS200                    | <i>IWS1</i>         | -4.843±0.411 | -5.244±0.549 | 6.84E-05 |
| cg20074593 | 2 | 128403286 | TSS200                    | <i>GPR17</i>        | 1.163±0.158  | 1.287±0.198  | 7.61E-04 |
| cg01900048 | 2 | 128458732 | GeneBody/5'UTR/1st exon   | <i>SFT2D3</i>       | -4.166±0.394 | -4.41±0.55   | 9.22E-03 |
| cg22854546 | 2 | 128568196 | GeneBody/5'UTR/1st intron | <i>WDR33</i>        | -5.174±0.417 | -5.629±0.525 | 9.71E-06 |
| cg20254231 | 2 | 128569115 | TSS1500                   | <i>WDR33</i>        | -3.962±0.229 | -4.243±0.369 | 4.96E-06 |
| cg01932215 | 2 | 128643031 | GeneBody/5'UTR/1st intron | <i>AMMECR1L</i>     | -6.035±0.4   | -6.333±0.469 | 1.10E-03 |
| cg15634735 | 2 | 128784622 | GeneBody/1st intron       | <i>SAP130</i>       | -4.659±0.49  | -4.998±0.399 | 1.21E-03 |
| cg07314414 | 2 | 128784923 | TSS200                    | <i>SAP130</i>       | -3.164±0.436 | -2.56±0.484  | 1.12E-07 |
| cg07034269 | 2 | 128848528 | TSS1500                   | <i>UGGT1</i>        | -3.608±0.264 | -3.871±0.312 | 3.24E-05 |
| cg13173909 | 2 | 128848815 | GeneBody/1st exon         | <i>UGGT1</i>        | -5.956±0.535 | -6.379±0.549 | 4.37E-04 |
| cg08113913 | 2 | 130902424 | GeneBody/1st exon         | <i>CCDC74B</i>      | -4.56±0.414  | -4.917±0.496 | 2.33E-04 |
| cg03956267 | 2 | 130939498 | TSS200                    | <i>MZT2B</i>        | -4.841±0.474 | -5.187±0.615 | 1.83E-03 |
| cg08790550 | 2 | 130955686 | GeneBody/1st intron       | <i>TUBA3E</i>       | 4.365±0.423  | 4.673±0.528  | 1.67E-03 |
| cg20630567 | 2 | 131099794 | GeneBody/5'UTR/1st exon   | <i>CCDC115</i>      | -4.818±0.283 | -5.216±0.565 | 2.35E-06 |
| cg12815916 | 2 | 131114432 | GeneBody/1st intron       | <i>PTPN18</i>       | 4.291±0.3    | 4.492±0.273  | 1.94E-03 |
| cg25745343 | 2 | 131862633 | GeneBody/5'UTR/1st exon   | <i>PLEKHB2</i>      | -3.861±0.5   | -4.183±0.533 | 3.61E-03 |
| cg11395917 | 2 | 131862942 | GeneBody/1st exon         | <i>PLEKHB2</i>      | -4.993±0.597 | -5.378±0.557 | 2.79E-03 |
| cg25828381 | 2 | 132233769 | GeneBody/5'UTR/1st exon   | <i>TUBA3D</i>       | 5.397±0.563  | 5.731±0.366  | 3.96E-03 |
| cg06540105 | 2 | 132285688 | GeneBody/1st exon         | <i>CCDC74A</i>      | -4.247±0.278 | -4.587±0.411 | 3.16E-06 |
| cg26216632 | 2 | 132479319 | TSS1500                   | <i>C2orf27A</i>     | 1.594±0.173  | 1.759±0.247  | 1.18E-04 |
| cg24890043 | 2 | 135476297 | GeneBody/1st intron       | <i>TMEM163</i>      | -4.917±0.644 | -5.348±0.642 | 2.26E-03 |
| cg17865752 | 2 | 135675644 | GeneBody/1st intron       | <i>LOC100129961</i> | -2.272±0.412 | -1.87±0.524  | 5.72E-05 |
| cg15527554 | 2 | 135782086 | GeneBody/1st intron       | <i>MAP3K19</i>      | 1.728±0.298  | 1.521±0.376  | 2.71E-03 |
| cg18312807 | 2 | 135809693 | TSS200                    | <i>RAB3GAP1</i>     | -5.141±0.455 | -5.439±0.454 | 2.72E-03 |
| cg12813922 | 2 | 135809940 | GeneBody/1st intron       | <i>RAB3GAP1</i>     | -4.696±0.546 | -5.329±0.618 | 2.66E-06 |
| cg13588645 | 2 | 136289118 | GeneBody/5'UTR/1st exon   | <i>R3HDM1</i>       | -5.559±0.502 | -6.007±0.59  | 1.43E-04 |
| cg25752527 | 2 | 136499146 | TSS200                    | <i>UBXN4</i>        | -4.794±0.379 | -5.16±0.376  | 3.15E-05 |
| cg05650565 | 2 | 136499412 | GeneBody/5'UTR/1st exon   | <i>UBXN4</i>        | -5.408±0.458 | -5.755±0.51  | 8.57E-04 |
| cg13056269 | 2 | 136633607 | GeneBody/1st intron       | <i>MCM6</i>         | -5.253±0.462 | -5.504±0.388 | 9.62E-03 |
| cg12124516 | 2 | 136634144 | TSS200                    | <i>MCM6</i>         | -4.137±0.485 | -4.587±0.64  | 1.25E-04 |
| cg11129291 | 2 | 136742688 | GeneBody/1st intron       | <i>DARS</i>         | -4.728±0.573 | -5.192±0.498 | 2.44E-04 |
| cg23996306 | 2 | 136743411 | TSS200                    | <i>DARS</i>         | -4.452±0.317 | -4.828±0.459 | 4.90E-06 |
| cg03608167 | 2 | 136875637 | GeneBody/5'UTR/1st exon   | <i>CXCR4</i>        | -5.46±0.436  | -5.808±0.389 | 3.06E-04 |
| cg21859434 | 2 | 136876021 | TSS1500                   | <i>CXCR4</i>        | -5.673±0.433 | -6.056±0.483 | 1.34E-04 |
| cg15441973 | 2 | 138721317 | TSS1500                   | <i>HNMT</i>         | 1.695±0.199  | 1.844±0.219  | 9.51E-04 |
| cg17717588 | 2 | 145052739 | TSS1500                   | <i>GTDC1</i>        | 2.326±0.285  | 2.491±0.321  | 9.53E-03 |
| cg14689355 | 2 | 148602399 | TSS200                    | <i>ACVR2A</i>       | -4.5±0.259   | -4.663±0.252 | 3.77E-03 |
| cg22464182 | 2 | 148602625 | GeneBody/5'UTR/1st exon   | <i>ACVR2A</i>       | -4.576±0.352 | -4.854±0.477 | 9.60E-04 |
| cg05218490 | 2 | 148778969 | GeneBody/5'UTR/1st intron | <i>ORC4</i>         | -3.236±0.22  | -3.427±0.32  | 4.21E-04 |
| cg11626656 | 2 | 151343868 | GeneBody/1st exon         | <i>RND3</i>         | -4.206±0.541 | -4.594±0.522 | 1.10E-03 |
| cg08463061 | 2 | 151344332 | TSS200                    | <i>RND3</i>         | -4.513±0.527 | -4.924±0.555 | 5.34E-04 |
| cg18581221 | 2 | 152118200 | GeneBody/1st intron       | <i>RBM43</i>        | -5.113±0.315 | -5.576±0.466 | 1.15E-07 |
| cg14046365 | 2 | 152146318 | GeneBody/5'UTR/1st exon   | <i>NMI</i>          | -3.96±0.546  | -4.289±0.514 | 5.22E-03 |
| cg06191203 | 2 | 152266755 | GeneBody/5'UTR/1st exon   | <i>RIF1</i>         | -5.185±0.515 | -5.704±0.654 | 3.42E-05 |
| cg24334790 | 2 | 152685205 | TSS200                    | <i>ARL5A</i>        | -4.868±0.398 | -5.208±0.447 | 2.14E-04 |
| cg01846065 | 2 | 153032369 | GeneBody/5'UTR/1st exon   | <i>STAM2</i>        | -5.054±0.392 | -5.294±0.346 | 4.14E-03 |
| cg07314337 | 2 | 153574424 | GeneBody/1st exon         | <i>ARL6IP6</i>      | -5.807±0.513 | -6.51±0.587  | 1.36E-07 |
| cg03759077 | 2 | 153575599 | GeneBody/1st intron       | <i>ARL6IP6</i>      | -4.54±0.244  | -4.95±0.408  | 1.43E-08 |
| cg27420236 | 2 | 154334716 | GeneBody/1st exon/3'UTR   | <i>RPRM</i>         | -3.403±0.402 | -3.648±0.502 | 7.75E-03 |
| cg04010530 | 2 | 157188933 | GeneBody/5'UTR/1st intron | <i>NR4A2</i>        | -4.611±0.579 | -4.958±0.587 | 6.00E-03 |
| cg19840387 | 2 | 159314016 | GeneBody/5'UTR/1st intron | <i>PKP4</i>         | -4.18±0.363  | -4.528±0.493 | 9.27E-05 |
| cg24580185 | 2 | 160143534 | TSS1500                   | <i>WDSUB1</i>       | -4.79±0.441  | -5.127±0.602 | 1.38E-03 |
| cg14325649 | 2 | 161350625 | TSS1500                   | <i>RBMS1</i>        | -3.959±0.372 | -4.22±0.461  | 2.35E-03 |
| cg06747888 | 2 | 162271859 | TSS1500                   | <i>TBR1</i>         | -2.477±0.328 | -2.672±0.349 | 7.00E-03 |
| cg12335708 | 2 | 162931003 | GeneBody/5'UTR/1st exon   | <i>DPP4</i>         | -1.856±0.249 | -2.03±0.325  | 2.71E-03 |
| cg06347928 | 2 | 163175126 | GeneBody/5'UTR/1st exon   | <i>IFIH1</i>        | -4.824±0.393 | -5.108±0.366 | 9.31E-04 |
| cg03594127 | 2 | 163200582 | GeneBody/5'UTR/1st exon   | <i>GCA</i>          | -4.161±0.389 | -4.496±0.511 | 3.19E-04 |
| cg01743370 | 2 | 163200975 | GeneBody/1st intron       | <i>GCA</i>          | -5.491±0.48  | -5.931±0.438 | 5.32E-05 |
| cg20557037 | 2 | 165698099 | TSS200                    | <i>COBL1</i>        | -3.963±0.314 | -4.313±0.537 | 3.42E-05 |
| cg15513137 | 2 | 166150369 | GeneBody/5'UTR/1st exon   | <i>SCN2A</i>        | -2.632±0.51  | -2.981±0.487 | 1.79E-03 |
| cg08347960 | 2 | 166150400 | GeneBody/5'UTR/1st exon   | <i>SCN2A</i>        | -1.988±0.564 | -2.462±0.554 | 2.90E-04 |
| cg13436799 | 2 | 170218997 | GeneBody/5'UTR/1st exon   | <i>LRP2</i>         | -3.822±0.359 | -4.05±0.474  | 6.53E-03 |
| cg16691888 | 2 | 170219230 | TSS200                    | <i>LRP2</i>         | -2.898±0.782 | -3.526±0.756 | 3.28E-04 |
| cg10006582 | 2 | 170335841 | TSS200                    | <i>BBS5</i>         | -4.905±0.309 | -5.133±0.279 | 7.37E-04 |
| cg05847778 | 2 | 170336167 | GeneBody/1st intron       | <i>BBS5</i>         | -5.355±0.414 | -5.704±0.373 | 1.57E-04 |
| cg21709140 | 2 | 171785487 | GeneBody/5'UTR/1st exon   | <i>GORASP2</i>      | -5.611±0.48  | -6.081±0.533 | 3.49E-05 |
| cg09503780 | 2 | 171786316 | GeneBody/1st intron       | <i>GORASP2</i>      | -5.302±0.499 | -5.768±0.509 | 5.28E-05 |
| cg13882835 | 2 | 172017928 | TSS1500                   | <i>TLK1</i>         | -3.747±0.488 | -4.13±0.597  | 7.44E-04 |
| cg10446968 | 2 | 172750661 | GeneBody/1st intron       | <i>SLC25A12</i>     | -5.086±0.548 | -5.531±0.47  | 2.27E-04 |
| cg15236866 | 2 | 172948825 | TSS1500                   | <i>DLX1</i>         | -2.477±0.267 | -2.664±0.32  | 2.09E-03 |
| cg03657766 | 2 | 172967014 | GeneBody/1st exon         | <i>DLX2</i>         | -4.229±0.406 | -4.577±0.481 | 2.40E-04 |
| cg17679246 | 2 | 173420265 | GeneBody/1st exon         | <i>PDK1</i>         | -4.967±0.406 | -5.422±0.493 | 5.74E-06 |
| cg09288658 | 2 | 173940639 | GeneBody/5'UTR/1st exon   | <i>ZAK</i>          | -5.107±0.355 | -5.338±0.536 | 7.76E-03 |
| cg08690031 | 2 | 174219209 | TSS1500                   | <i>CDCA7</i>        | -3.662±0.464 | -4±0.564     | 1.60E-03 |
| cg07455975 | 2 | 175112849 | GeneBody/5'UTR/1st intron | <i>OLA1</i>         | -3.445±0.296 | -3.644±0.31  | 2.34E-03 |
| cg25492727 | 2 | 175113587 | TSS1500                   | <i>OLA1</i>         | -5.514±0.451 | -5.771±0.452 | 8.70E-03 |
| cg22830590 | 2 | 175260396 | GeneBody/5'UTR/1st exon   | <i>CIR1</i>         | -4.876±0.43  | -5.229±0.579 | 6.24E-04 |
| cg27393372 | 2 | 175260701 | GeneBody/1st intron       | <i>SCRN3</i>        | -5.395±0.441 | -5.74±0.41   | 4.18E-04 |
| cg22190861 | 2 | 175351711 | GeneBody/5'UTR/1st exon   | <i>GPR155</i>       | -5.694±0.657 | -6.167±0.576 | 9.00E-04 |
| cg11695601 | 2 | 175870435 | TSS1500                   | <i>CHN1</i>         | -4.18±0.376  | -4.492±0.506 | 5.31E-04 |
| cg26965059 | 2 | 176032539 | TSS200                    | <i>MIR933</i>       | -5.254±0.42  | -5.644±0.535 | 1.11E-04 |
| cg07428089 | 2 | 176046170 | GeneBody/5'UTR/1st exon   | <i>ATP5G3</i>       | -4.7±0.759   | -5.146±0.816 | 7.78E-03 |
| cg03874199 | 2 | 176964456 | TSS200                    | <i>HOXD12</i>       | -3.625±0.324 | -3.903±0.515 | 7.33E-04 |
| cg10957151 | 2 | 176986956 | TSS1500                   | <i>HOXD9</i>        | -1.956±0.174 | -2.106±0.281 | 7.48E-04 |
| cg19280014 | 2 | 177134307 | GeneBody/5'UTR/1st exon   | <i>MTX2</i>         | -5.18±0.537  | -5.579±0.574 | 9.49E-04 |
| cg20247600 | 2 | 178129336 | GeneBody/5'UTR/1st exon   | <i>NFE2L2</i>       | -2.696±0.158 | -2.839±0.365 | 2.97E-03 |
| cg02961200 | 2 | 178257176 | GeneBody/1st intron       | <i>LOC100130691</i> | -3.994±0.348 | -4.3±0.432   | 1.97E-04 |
| cg13332925 | 2 | 178257559 | GeneBody/1st exon         | <i>AGPS</i>         | -6.038±0.824 | -6.814±0.622 | 2.86E-05 |
| cg02549910 | 2 | 178483601 | GeneBody/5'UTR/1st exon   | <i>TTC30A</i>       | -4.912±0.314 | -5.293±0.464 | 3.58E-06 |
| cg26147657 | 2 | 178483882 | TSS200                    | <i>TTC30A</i>       | -4.813±0.536 | -5.267±0.497 | 1.54E-04 |
| cg09890200 | 2 | 179316161 | TSS200                    | <i>DFNB59</i>       | -4.721±0.359 | -5.163±0.491 | 1.98E-06 |
| cg03283842 | 2 | 179343803 | TSS1500                   | <i>FKBP7</i>        | -3.74±0.408  | -4.048±0.431 | 7.89E-04 |
| cg20415809 | 2 | 182321855 | GeneBody/5'UTR/1st exon   | <i>ITGA4</i>        | -4.091±0.587 | -4.526±0.515 | 6.75E-04 |

|            |   |           |                           |              |              |              |          |
|------------|---|-----------|---------------------------|--------------|--------------|--------------|----------|
| cg26778754 | 2 | 182756177 | TSS1500                   | SSFA2        | -4.745±0.525 | -5.117±0.428 | 9.47E-04 |
| cg03276813 | 2 | 182757157 | GeneBody/1st intron       | SSFA2        | -5.812±0.293 | -6.033±0.591 | 7.07E-03 |
| cg12484193 | 2 | 183943469 | GeneBody/5'UTR/1st exon   | DUSP19       | -4.882±0.608 | -5.414±0.635 | 1.37E-04 |
| cg07990489 | 2 | 183989218 | GeneBody/1st exon         | NUP35        | -4.887±0.349 | -5.098±0.314 | 4.79E-03 |
| cg15566222 | 2 | 187350716 | TSS200                    | ZC3H15       | -5.564±0.474 | -5.854±0.377 | 3.72E-03 |
| cg18757066 | 2 | 187351078 | GeneBody/5'UTR/1st exon   | ZC3H15       | -5.191±0.446 | -5.622±0.425 | 2.90E-05 |
| cg07909265 | 2 | 187455298 | GeneBody/1st intron       | ITGAV        | -5.073±0.53  | -5.442±0.497 | 1.38E-03 |
| cg26781575 | 2 | 187558534 | TSS1500                   | FAM171B      | -3.495±0.22  | -3.64±0.265  | 3.78E-03 |
| cg23477967 | 2 | 188419087 | GeneBody/5'UTR/1st exon   | TFPI         | -2.913±0.342 | -3.167±0.442 | 1.54E-03 |
| cg10426652 | 2 | 190305703 | TSS1500                   | WDR75        | -4.284±0.457 | -4.713±0.505 | 5.86E-05 |
| cg23521281 | 2 | 190306491 | GeneBody/1st intron       | WDR75        | -5.711±0.452 | -6.122±0.509 | 9.59E-05 |
| cg11692477 | 2 | 190445477 | GeneBody/5'UTR/1st exon   | SLC40A1      | -5.098±0.509 | -5.59±0.581  | 4.50E-05 |
| cg11483915 | 2 | 190446080 | TSS1500                   | SLC40A1      | -4.036±0.417 | -4.272±0.436 | 9.77E-03 |
| cg20767936 | 2 | 190526040 | TSS200                    | ASNSD1       | -4.213±0.25  | -4.405±0.222 | 4.70E-04 |
| cg19070338 | 2 | 190526263 | GeneBody/5'UTR/1st exon   | ASNSD1       | -4.828±0.414 | -5.175±0.608 | 6.79E-04 |
| cg26454191 | 2 | 190648463 | TSS1500                   | PMS1         | -4.382±0.42  | -4.754±0.447 | 1.17E-04 |
| cg22234344 | 2 | 191184810 | TSS200                    | HIBCH        | -4.989±0.535 | -5.4±0.523   | 5.49E-04 |
| cg16691616 | 2 | 191209057 | GeneBody/5'UTR/1st intron | INPP1        | -4.384±0.446 | -4.73±0.455  | 5.34E-04 |
| cg06952117 | 2 | 191514435 | GeneBody/5'UTR/1st intron | NAB1         | -5.403±0.485 | -5.783±0.477 | 4.45E-04 |
| cg00493400 | 2 | 191879127 | TSS200                    | STAT1        | -5.46±0.524  | -5.829±0.458 | 1.14E-03 |
| cg09666654 | 2 | 192110658 | GeneBody/5'UTR/1st intron | MYO1B        | -4.115±0.293 | -4.305±0.45  | 8.59E-03 |
| cg10863038 | 2 | 192542548 | TSS1500                   | NABP1        | -5.695±0.36  | -5.91±0.333  | 5.44E-03 |
| cg06352750 | 2 | 192711926 | GeneBody/5'UTR/1st exon   | SDPR         | -4.149±0.428 | -4.389±0.392 | 8.63E-03 |
| cg22272545 | 2 | 197036243 | GeneBody/5'UTR/1st exon   | STK17B       | -4.445±0.376 | -4.743±0.558 | 1.27E-03 |
| cg02358761 | 2 | 197036780 | TSS1500                   | STK17B       | -3.752±0.336 | -4.003±0.443 | 1.50E-03 |
| cg26194560 | 2 | 197664318 | GeneBody/1st exon         | GTF3C3       | -3.25±0.262  | -3.485±0.306 | 1.33E-04 |
| cg11197066 | 2 | 197791305 | GeneBody/1st exon         | PGAP1        | -4.835±0.372 | -5.11±0.489  | 1.72E-03 |
| cg22110261 | 2 | 197791986 | TSS1500                   | PGAP1        | -4.948±0.546 | -5.259±0.463 | 7.00E-03 |
| cg17987231 | 2 | 198317829 | TSS1500                   | COQ10B       | -4.584±0.279 | -4.781±0.432 | 4.38E-03 |
| cg17293470 | 2 | 198318630 | GeneBody/1st intron       | COQ10B       | -5.339±0.472 | -5.612±0.423 | 6.55E-03 |
| cg04183933 | 2 | 198363868 | GeneBody/5'UTR/1st intron | HSPD1        | -4.634±0.6   | -5.255±0.608 | 1.16E-05 |
| cg14212314 | 2 | 198364789 | GeneBody/5'UTR/1st exon   | HSPE1        | -4.603±0.351 | -4.878±0.47  | 9.72E-04 |
| cg08373610 | 2 | 198540621 | TSS200                    | RFTN2        | -2.938±0.314 | -3.145±0.445 | 5.80E-03 |
| cg26792080 | 2 | 200324879 | GeneBody/5'UTR            | SATB2        | -2.554±0.189 | -2.7±0.258   | 1.28E-03 |
| cg03947362 | 2 | 200820154 | GeneBody/5'UTR/1st intron | C2orf47      | -5.1±0.468   | -5.636±0.561 | 3.91E-06 |
| cg02144933 | 2 | 201450690 | TSS200                    | AOX1         | -4.338±0.381 | -4.613±0.512 | 2.29E-03 |
| cg27561421 | 2 | 201676720 | TSS200                    | BZW1         | -5.455±0.454 | -5.725±0.378 | 4.86E-03 |
| cg20218060 | 2 | 201729279 | GeneBody/5'UTR/1st exon   | CLK1         | -5.734±0.429 | -5.97±0.365  | 9.07E-03 |
| cg14047656 | 2 | 201936671 | GeneBody/5'UTR/1st exon   | NDUFB3       | -4.792±0.412 | -5.113±0.623 | 1.60E-03 |
| cg17802847 | 2 | 201980910 | GeneBody/5'UTR/1st exon   | CFLAR        | -4.757±0.571 | -5.199±0.549 | 4.88E-04 |
| cg26986815 | 2 | 202149369 | GeneBody                  | CASP8        | 2.18±0.203   | 2.448±0.301  | 8.82E-07 |
| cg24749970 | 2 | 202315857 | GeneBody/5'UTR/1st intron | TRAK2        | -5.517±0.519 | -5.951±0.526 | 2.15E-04 |
| cg01585758 | 2 | 203102753 | GeneBody/1st intron       | SUMO1        | -3.031±0.179 | -3.23±0.3    | 3.25E-05 |
| cg02592124 | 2 | 203103479 | TSS200                    | SUMO1        | -5.118±0.355 | -5.465±0.371 | 2.95E-05 |
| cg17872064 | 2 | 203130438 | TSS200                    | NOP58        | -4.819±0.504 | -5.353±0.697 | 2.35E-05 |
| cg00720723 | 2 | 203130645 | GeneBody/5'UTR/1st exon   | NOP58        | -4.33±0.509  | -4.781±0.546 | 1.20E-04 |
| cg21566550 | 2 | 203240691 | TSS1500                   | BMPR2        | -5.659±0.537 | -6.124±0.524 | 1.31E-04 |
| cg09410845 | 2 | 203241870 | GeneBody/5'UTR/1st exon   | BMPR2        | -3.772±0.416 | -4.099±0.519 | 7.96E-04 |
| cg10962407 | 2 | 203736738 | TSS1500                   | ICA1L        | -5.437±0.366 | -5.873±0.538 | 4.98E-06 |
| cg10252059 | 2 | 204103465 | GeneBody/5'UTR/1st exon   | CYP20A1      | -4.471±0.315 | -4.754±0.396 | 1.60E-04 |
| cg09845946 | 2 | 204192806 | TSS200                    | ABI2         | -5.11±0.43   | -5.499±0.503 | 1.16E-04 |
| cg05462826 | 2 | 204193327 | GeneBody/1st exon         | ABI2         | -4.445±0.288 | -4.695±0.34  | 2.08E-04 |
| cg06707338 | 2 | 207024452 | GeneBody/5'UTR/1st intron | EEF1B2       | -5.349±0.44  | -5.93±0.572  | 4.78E-07 |
| cg26258845 | 2 | 207308087 | TSS1500                   | ADAM23       | -5.009±0.556 | -5.477±0.545 | 1.82E-04 |
| cg16778809 | 2 | 207308375 | GeneBody/5'UTR/1st exon   | ADAM23       | -4.08±0.311  | -4.35±0.482  | 5.53E-04 |
| cg11065518 | 2 | 207630263 | GeneBody/5'UTR/1st exon   | FASTKD2      | -4.462±0.437 | -4.707±0.431 | 9.64E-03 |
| cg06194186 | 2 | 207803693 | TSS1500                   | CPO          | 1.385±0.242  | 1.149±0.269  | 3.56E-05 |
| cg18579327 | 2 | 208395557 | GeneBody/5'UTR/1st intron | CREB1        | -4.269±0.352 | -4.662±0.468 | 8.62E-06 |
| cg22670349 | 2 | 208576197 | TSS200                    | CCNYL1       | -5.332±0.46  | -5.66±0.425  | 1.07E-03 |
| cg14951734 | 2 | 208576279 | GeneBody/5'UTR/1st exon   | CCNYL1       | -5.581±0.472 | -6.011±0.519 | 9.17E-05 |
| cg26129270 | 2 | 208634933 | TSS1500                   | FZD5         | -5.064±0.525 | -5.443±0.479 | 9.26E-04 |
| cg24324379 | 2 | 209119750 | GeneBody/5'UTR/1st exon   | IDH1         | -3.575±0.263 | -3.807±0.496 | 1.27E-03 |
| cg01046174 | 2 | 209130700 | TSS1500                   | PIKFYVE      | -5.504±0.644 | -5.898±0.521 | 3.67E-03 |
| cg05306006 | 2 | 210867127 | TSS200                    | RPE          | -5.088±0.391 | -5.362±0.448 | 2.00E-03 |
| cg19203504 | 2 | 210867411 | GeneBody/5'UTR/1st exon   | RPE          | -2.223±0.393 | -2.488±0.395 | 2.20E-03 |
| cg11735605 | 2 | 214016230 | GeneBody/5'UTR/1st exon   | IKZF2        | -4.539±0.41  | -4.937±0.496 | 5.08E-05 |
| cg07900766 | 2 | 214148972 | TSS200                    | LOC100130451 | -5.14±0.548  | -5.503±0.48  | 2.05E-03 |
| cg24664861 | 2 | 214149200 | GeneBody/1st exon         | SPAG16       | -5.038±0.497 | -5.384±0.479 | 1.46E-03 |
| cg08803144 | 2 | 216176550 | TSS200                    | ATIC         | -4.398±0.35  | -4.698±0.401 | 2.11E-04 |
| cg02668581 | 2 | 216878340 | GeneBody/5'UTR/1st exon   | MREG         | -5.031±0.306 | -5.435±0.491 | 1.37E-06 |
| cg06250108 | 2 | 216946398 | GeneBody/1st exon         | PECR         | -4.017±0.297 | -4.268±0.414 | 5.02E-04 |
| cg21803680 | 2 | 216946845 | GeneBody/5'UTR/1st intron | TMEM169      | -4.385±0.301 | -4.698±0.404 | 2.78E-05 |
| cg16579354 | 2 | 216974337 | GeneBody/1st intron       | XRCC5        | -4.254±0.357 | -4.465±0.26  | 4.39E-03 |
| cg12591323 | 2 | 217278609 | GeneBody/5'UTR            | SMARCAL1     | 3.236±0.226  | 3.431±0.285  | 2.79E-04 |
| cg27140880 | 2 | 217363404 | TSS200                    | RPL37A       | -4.503±0.483 | -4.852±0.534 | 1.34E-03 |
| cg23631636 | 2 | 217363620 | GeneBody/1st intron       | RPL37A       | -5.369±0.616 | -5.936±0.78  | 1.19E-04 |
| cg25854162 | 2 | 217497617 | TSS1500                   | IGFBP2       | -2.603±0.293 | -2.877±0.412 | 1.47E-04 |
| cg22467567 | 2 | 217559885 | GeneBody/5'UTR/1st exon   | IGFBP5       | -2.621±0.234 | -2.784±0.328 | 3.49E-03 |
| cg10376763 | 2 | 217724363 | GeneBody/3'UTR            | TNP1         | 3±0.193      | 3.148±0.195  | 5.78E-04 |
| cg13240332 | 2 | 219081679 | TSS200                    | ARPC2        | -4.819±0.518 | -5.158±0.566 | 3.32E-03 |
| cg12224394 | 2 | 219134788 | GeneBody/1st exon         | AAMP         | -4.851±0.457 | -5.135±0.354 | 3.09E-03 |
| cg14849559 | 2 | 219157356 | TSS200                    | TMBIM1       | -4.208±0.464 | -4.545±0.473 | 1.08E-03 |
| cg27367952 | 2 | 219221586 | GeneBody/5'UTR/1st exon   | C2orf62      | -2.487±0.118 | -2.664±0.299 | 9.23E-06 |
| cg10887392 | 2 | 219264158 | TSS1500                   | CTDSP1       | -5.279±0.359 | -5.514±0.467 | 5.02E-03 |
| cg23889021 | 2 | 219264573 | GeneBody/5'UTR/1st exon   | CTDSP1       | -4.411±0.541 | -4.942±0.595 | 3.22E-05 |
| cg15248979 | 2 | 219434002 | GeneBody/1st intron       | RQCD1        | -5.36±0.37   | -5.602±0.351 | 2.57E-03 |
| cg26354238 | 2 | 219434613 | GeneBody/1st intron       | RQCD1        | -3.559±0.285 | -3.77±0.408  | 2.24E-03 |
| cg25961684 | 2 | 219536870 | TSS200                    | RNF25        | -4.92±0.324  | -5.136±0.29  | 1.95E-03 |
| cg20851245 | 2 | 219538212 | TSS1500                   | RNF25        | 2.852±0.261  | 3.029±0.217  | 1.51E-03 |
| cg16256504 | 2 | 219724157 | TSS1500                   | WNT6         | -3.535±0.298 | -3.837±0.472 | 8.33E-05 |
| cg19868691 | 2 | 219744597 | TSS1500                   | WNT10A       | -2.259±0.303 | -2.08±0.248  | 5.15E-03 |
| cg11269533 | 2 | 219850301 | GeneBody/5'UTR/1st exon   | FEV          | -3.103±0.23  | -3.304±0.318 | 3.41E-04 |
| cg10775273 | 2 | 219857927 | GeneBody/5'UTR/1st exon   | CRYBA2       | -5.497±0.468 | -5.919±0.803 | 5.99E-04 |
| cg20972416 | 2 | 220025218 | GeneBody/5'UTR/1st intron | NHEJ1        | -5.609±0.588 | -6.049±0.652 | 9.38E-04 |
| cg21020082 | 2 | 220042127 | TSS1500                   | CNPPD1       | -4.315±0.498 | -4.767±0.513 | 8.14E-05 |

|            |   |           |                           |           |              |              |          |
|------------|---|-----------|---------------------------|-----------|--------------|--------------|----------|
| cg11837864 | 2 | 220043521 | GeneBody/1st intron       | FAM134A   | -4.605±0.374 | -5.079±0.469 | 8.32E-07 |
| cg12361925 | 2 | 220043530 | GeneBody/1st intron       | FAM134A   | -4.297±0.273 | -4.479±0.251 | 2.13E-03 |
| cg15278948 | 2 | 220071103 | TSS1500                   | ZFAND2B   | -4.505±0.331 | -4.808±0.331 | 6.84E-05 |
| cg19355685 | 2 | 220071637 | GeneBody/5'UTR/1st exon   | ZFAND2B   | -6.962±0.692 | -7.544±0.741 | 2.31E-04 |
| cg10185638 | 2 | 220094490 | GeneBody/5'UTR/1st exon   | ANKZF1    | -5.34±0.437  | -5.603±0.551 | 8.98E-03 |
| cg02240226 | 2 | 220110027 | GeneBody/5'UTR/1st exon   | GLB1L     | -5.514±0.478 | -6.015±0.458 | 8.60E-06 |
| cg01693157 | 2 | 220118273 | GeneBody/1st intron       | TUBA4B    | -5.143±0.361 | -5.374±0.362 | 3.39E-03 |
| cg09197965 | 2 | 220119179 | GeneBody/5'UTR/1st exon   | TUBA4A    | -4.925±0.312 | -5.181±0.34  | 3.34E-04 |
| cg18797053 | 2 | 220143977 | TSS200                    | DNAJB2    | -4.916±0.292 | -5.333±0.515 | 6.24E-07 |
| cg14091223 | 2 | 220144326 | GeneBody/5'UTR/1st intron | DNAJB2    | -4.83±0.42   | -5.179±0.623 | 7.60E-04 |
| cg27321538 | 2 | 220252231 | GeneBody/1st intron       | DNPEP     | -4.826±0.729 | -5.361±0.696 | 8.49E-04 |
| cg17610929 | 2 | 220379044 | GeneBody/5'UTR/1st exon   | ASIC4     | -4.844±0.525 | -5.209±0.588 | 2.03E-03 |
| cg06625414 | 2 | 220492692 | GeneBody                  | SLC4A3    | -5.367±0.429 | -5.662±0.513 | 2.63E-03 |
| cg15808558 | 2 | 222437611 | TSS1500                   | EPHA4     | -4.307±0.292 | -4.495±0.258 | 2.68E-03 |
| cg13496838 | 2 | 223164747 | TSS1500                   | PAX3      | -2.535±0.213 | -2.71±0.33   | 1.03E-03 |
| cg24686224 | 2 | 223520411 | GeneBody/1st intron       | FARSB     | -5.133±0.504 | -5.418±0.423 | 7.21E-03 |
| cg02453591 | 2 | 223521088 | TSS1500                   | FARSB     | -4.138±0.531 | -4.597±0.49  | 1.19E-04 |
| cg22111003 | 2 | 223725731 | GeneBody/5'UTR/1st exon   | ACSL3     | -4.873±0.467 | -5.269±0.575 | 3.10E-04 |
| cg01668465 | 2 | 224467144 | GeneBody/5'UTR/1st exon   | SCG2      | -2.84±0.455  | -3.339±0.61  | 1.19E-05 |
| cg12833508 | 2 | 224701802 | GeneBody/1st intron       | AP1S3     | -3.512±0.265 | -3.797±0.338 | 1.31E-05 |
| cg17569486 | 2 | 224702267 | GeneBody/5'UTR/1st exon   | AP1S3     | -4.313±0.522 | -4.661±0.473 | 2.00E-03 |
| cg00382515 | 2 | 224822229 | GeneBody/1st exon         | MRPL44    | -5.758±0.555 | -6.091±0.47  | 4.62E-03 |
| cg11703011 | 2 | 224903461 | TSS200                    | SERPINE2  | -4.279±0.229 | -4.556±0.398 | 1.05E-05 |
| cg24516901 | 2 | 225266801 | TSS200                    | FAM124B   | -1.853±0.332 | -2.081±0.429 | 3.16E-03 |
| cg03091512 | 2 | 227701050 | GeneBody/5'UTR/1st intron | RHBDD1    | -4.85±0.262  | -5.044±0.249 | 7.68E-04 |
| cg16640096 | 2 | 228029790 | GeneBody/1st intron       | COL4A3    | -3.205±0.195 | -3.351±0.248 | 1.43E-03 |
| cg07864632 | 2 | 230785697 | GeneBody/5'UTR/1st intron | TRIP12    | -4.837±0.51  | -5.126±0.418 | 7.00E-03 |
| cg11206667 | 2 | 230786584 | GeneBody/5'UTR/1st intron | TRIP12    | -5.235±0.549 | -5.61±0.508  | 1.66E-03 |
| cg02056135 | 2 | 231084523 | GeneBody/5'UTR/1st intron | SP110     | -4.682±0.507 | -5.038±0.468 | 1.24E-03 |
| cg23539753 | 2 | 231280698 | TSS200                    | SP100     | -4.078±0.275 | -4.285±0.418 | 2.23E-03 |
| cg05091653 | 2 | 231281474 | GeneBody/5'UTR/1st exon   | SP100     | -2.935±0.275 | -2.674±0.373 | 1.04E-04 |
| cg21842664 | 2 | 231578467 | GeneBody/5'UTR/1st exon   | CAB39     | -4.816±0.592 | -5.213±0.53  | 1.87E-03 |
| cg13216088 | 2 | 231921414 | TSS200                    | PSMD1     | -4.612±0.364 | -5.032±0.543 | 8.97E-06 |
| cg04383012 | 2 | 231921692 | GeneBody/1st exon         | PSMD1     | -5.303±0.44  | -5.556±0.469 | 8.79E-03 |
| cg06096336 | 2 | 231989800 | GeneBody/5'UTR/1st exon   | HTR2B     | -0.311±0.255 | -0.094±0.299 | 2.61E-04 |
| cg03369671 | 2 | 232063176 | TSS200                    | ARMC9     | -5.366±0.362 | -5.656±0.341 | 3.24E-04 |
| cg26089280 | 2 | 232063611 | GeneBody/5'UTR/1st intron | ARMC9     | -5.626±0.418 | -5.895±0.522 | 5.19E-03 |
| cg19709058 | 2 | 232378848 | GeneBody/1st exon         | LINC00471 | -4.539±0.419 | -4.847±0.493 | 1.29E-03 |
| cg10660136 | 2 | 232379107 | TSS200                    | LINC00471 | -5.823±0.667 | -6.35±0.586  | 3.33E-04 |
| cg19540408 | 2 | 232456289 | TSS1500                   | C2orf57   | 1.114±0.234  | 0.974±0.301  | 9.90E-03 |
| cg22932215 | 2 | 232651635 | GeneBody/5'UTR/1st intron | COP57B    | -3.575±0.568 | -3.917±0.554 | 5.48E-03 |
| cg09536738 | 2 | 233497827 | TSS1500                   | EFHD1     | -2.432±0.45  | -2.742±0.501 | 2.15E-03 |
| cg09138627 | 2 | 233562476 | GeneBody/1st intron       | GIGYF2    | -5.389±0.6   | -5.895±0.536 | 1.53E-04 |
| cg24198840 | 2 | 233897561 | GeneBody/1st exon         | NEU2      | 3.178±0.234  | 3.406±0.337  | 9.19E-05 |
| cg13281719 | 2 | 234160162 | TSS200                    | ATG16L1   | -4.689±0.462 | -5.102±0.58  | 1.75E-04 |
| cg07823755 | 2 | 234668355 | TSS1500                   | UGT1A1    | 3.603±0.314  | 3.834±0.326  | 9.80E-04 |
| cg21650900 | 2 | 235405122 | GeneBody/1st exon         | ARL4C     | -5.553±0.522 | -6.175±0.661 | 2.48E-06 |
| cg13539030 | 2 | 235405968 | TSS1500                   | ARL4C     | -5.709±0.584 | -6.091±0.524 | 2.38E-03 |
| cg15144793 | 2 | 235861303 | GeneBody/5'UTR/1st intron | SH3BP4    | -5.002±0.496 | -5.411±0.68  | 6.15E-04 |
| cg04856858 | 2 | 236402015 | TSS1500                   | AGAP1     | -2.737±0.334 | -3.04±0.536  | 4.06E-04 |
| cg03275186 | 2 | 237994061 | TSS200                    | COP58     | -4.345±0.307 | -4.72±0.379  | 1.46E-06 |
| cg10173675 | 2 | 238513348 | 0                         | 0         | 2.991±0.249  | 3.234±0.348  | 8.16E-05 |
| cg16354207 | 2 | 238874908 | TSS1500                   | UBE2F     | -3.166±0.361 | -3.416±0.435 | 2.42E-03 |
| cg22418360 | 2 | 238876345 | GeneBody/1st intron       | UBE2F     | -3.226±0.384 | -2.895±0.566 | 5.08E-04 |
| cg16334840 | 2 | 238968944 | TSS1500                   | SCLY      | -3.836±0.295 | -4.203±0.379 | 1.29E-06 |
| cg14601560 | 2 | 238970191 | GeneBody/1st intron       | SCLY      | -3.291±0.166 | -3.416±0.214 | 1.30E-03 |
| cg23905308 | 2 | 239196947 | GeneBody/5'UTR/1st intron | PER2      | -4.958±0.677 | -5.607±0.584 | 2.67E-05 |
| cg00731459 | 2 | 240323091 | TSS1500                   | HDAC4     | -4.858±0.345 | -5.251±0.525 | 1.16E-05 |
| cg24275354 | 2 | 240964415 | GeneBody/1st intron       | NDUFA10   | -5.172±0.555 | -5.491±0.56  | 8.22E-03 |
| cg12804976 | 2 | 240965148 | TSS1500                   | NDUFA10   | -4.246±0.301 | -4.688±0.459 | 1.24E-07 |
| cg06840226 | 2 | 241375513 | GeneBody/1st intron       | GPC1      | -5.386±0.616 | -5.981±0.695 | 4.34E-05 |
| cg17422427 | 2 | 241507521 | TSS1500                   | RNPEPL1   | -4.53±0.376  | -4.819±0.443 | 8.37E-04 |
| cg00497251 | 2 | 241508725 | GeneBody/1st intron       | RNPEPL1   | -3.387±0.297 | -3.62±0.394  | 9.57E-04 |
| cg24941797 | 2 | 241526520 | GeneBody/1st intron       | CAPN10    | -6.322±0.547 | -6.867±0.547 | 2.00E-05 |
| cg11034784 | 2 | 242041544 | GeneBody/1st intron       | MTERFD2   | -4.803±0.309 | -5.192±0.48  | 2.66E-06 |
| cg04884732 | 2 | 242042016 | TSS1500                   | MTERFD2   | -4.232±0.408 | -4.478±0.44  | 6.52E-03 |
| cg26102760 | 2 | 242088848 | GeneBody/5'UTR/1st exon   | PASK      | -5.559±0.429 | -6.014±0.654 | 3.74E-05 |
| cg12054421 | 2 | 242090264 | GeneBody/1st intron       | PPP1R7    | -4.498±0.455 | -4.809±0.413 | 1.58E-03 |
| cg23888423 | 2 | 242254170 | TSS1500                   | 44076     | -4.661±0.399 | -4.923±0.385 | 2.56E-03 |
| cg00763679 | 2 | 242254198 | TSS1500                   | 44076     | -3.972±0.344 | -4.28±0.384  | 1.18E-04 |
| cg14353516 | 2 | 242256053 | GeneBody/5'UTR/1st intron | 44076     | -2.708±0.156 | -2.902±0.249 | 3.77E-06 |
| cg00567479 | 2 | 242295999 | GeneBody/5'UTR/1st intron | FARP2     | -4.194±0.464 | -4.525±0.624 | 2.50E-03 |
| cg14172532 | 2 | 242447907 | TSS200                    | STK25     | -5.273±0.539 | -5.671±0.557 | 9.49E-04 |
| cg03600687 | 2 | 242499012 | TSS1500                   | BOK-AS1   | -4.148±0.513 | -4.51±0.633  | 2.17E-03 |
| cg11116142 | 3 | 3221344   | GeneBody/1st exon         | CRBN      | -5.554±0.465 | -6.007±0.52  | 3.81E-05 |
| cg01892727 | 3 | 3221728   | TSS1500                   | CRBN      | -2.118±0.346 | -2.312±0.348 | 9.80E-03 |
| cg15384599 | 3 | 4344887   | TSS200                    | SETMAR    | -4.169±0.296 | -4.438±0.444 | 2.99E-04 |
| cg15232450 | 3 | 4345438   | GeneBody/1st exon         | SETMAR    | -5.204±0.266 | -5.395±0.324 | 1.79E-03 |
| cg21858376 | 3 | 4534791   | TSS1500                   | ITPR1     | -4.685±0.339 | -5.101±0.455 | 1.87E-06 |
| cg04251662 | 3 | 4535075   | GeneBody/5'UTR/1st exon   | ITPR1     | -5.511±0.441 | -5.777±0.429 | 5.36E-03 |
| cg12097239 | 3 | 5163769   | TSS200                    | ARL8B     | -3.622±0.249 | -3.835±0.4   | 8.01E-04 |
| cg02100848 | 3 | 8693859   | TSS200                    | SSUH2     | 1.438±0.209  | 1.621±0.274  | 2.50E-04 |
| cg23391006 | 3 | 8811279   | GeneBody/5'UTR/1st exon   | OXTR      | -4.723±0.251 | -4.923±0.328 | 7.68E-04 |
| cg04765422 | 3 | 9004773   | GeneBody/1st intron       | RAD18     | -3.525±0.299 | -3.809±0.453 | 1.63E-04 |
| cg03438515 | 3 | 9291212   | GeneBody/5'UTR/1st exon   | SRGAP3    | -4.591±0.255 | -4.78±0.295  | 1.14E-03 |
| cg06679221 | 3 | 9405070   | GeneBody/5'UTR/1st intron | THUMPD3   | -4.49±0.418  | -4.763±0.55  | 5.27E-03 |
| cg20051033 | 3 | 9746059   | GeneBody/1st intron       | CPE9E     | -2.727±0.221 | -2.555±0.41  | 3.73E-03 |
| cg17738494 | 3 | 9773251   | TSS200                    | BRPF1     | -4.198±0.478 | -4.528±0.505 | 1.90E-03 |
| cg14800883 | 3 | 9834004   | TSS200                    | ARPC4     | -3.037±0.567 | -3.449±0.592 | 1.13E-03 |
| cg03375833 | 3 | 9859360   | GeneBody                  | TTL3      | 2.154±0.398  | 1.887±0.499  | 3.74E-03 |
| cg23459997 | 3 | 9932426   | GeneBody/1st exon         | JAGN1     | -5.48±0.405  | -5.779±0.426 | 9.66E-04 |
| cg05845178 | 3 | 9957531   | TSS1500                   | IL17RC    | -4.935±0.537 | -5.469±0.624 | 3.15E-05 |
| cg15394409 | 3 | 10028474  | GeneBody/5'UTR/1st exon   | EMC3      | -5.451±0.308 | -5.724±0.381 | 1.80E-04 |
| cg24596576 | 3 | 10067780  | GeneBody/1st exon         | CIDECP    | -4.495±0.306 | -4.798±0.549 | 2.53E-04 |
| cg13560548 | 3 | 10150139  | TSS1500                   | FANCD2OS  | 1.701±0.382  | 1.949±0.437  | 3.85E-03 |

|            |   |          |                           |            |              |              |          |
|------------|---|----------|---------------------------|------------|--------------|--------------|----------|
| cg11827595 | 3 | 10157099 | TSS1500                   | BRK1       | -3.644±0.428 | -3.892±0.451 | 8.24E-03 |
| cg00149659 | 3 | 10157352 | GeneBody/5'UTR/1st exon   | BRK1       | -4.827±0.517 | -5.336±0.638 | 4.43E-05 |
| cg22782492 | 3 | 10184007 | GeneBody/1st intron       | VHL        | -4.054±0.253 | -4.295±0.416 | 2.43E-04 |
| cg03509024 | 3 | 10184013 | GeneBody/1st intron       | VHL        | -4.78±0.378  | -5.218±0.548 | 7.23E-06 |
| cg10387416 | 3 | 10290486 | GeneBody/5'UTR/1st exon   | TATDN2     | -4.92±0.471  | -5.175±0.298 | 7.92E-03 |
| cg14011734 | 3 | 10290674 | GeneBody/5'UTR/1st exon   | TATDN2     | -4.711±0.556 | -5.08±0.535  | 2.28E-03 |
| cg20282199 | 3 | 10363027 | TSS200                    | SEC13      | -2.978±0.178 | -3.194±0.301 | 8.68E-06 |
| cg23610018 | 3 | 11761460 | GeneBody/5'UTR/1st intron | VGLL4      | -5.985±0.619 | -6.597±0.694 | 3.08E-05 |
| cg03169527 | 3 | 11885582 | TSS1500                   | TAMM41     | -4.281±0.885 | -4.774±0.786 | 8.61E-03 |
| cg04172348 | 3 | 12046004 | GeneBody/5'UTR/1st exon   | SYN2       | -4.071±0.44  | -4.366±0.575 | 4.07E-03 |
| cg08220793 | 3 | 12526042 | GeneBody/5'UTR/1st exon   | TSEN2      | -5.423±0.434 | -5.706±0.445 | 2.94E-03 |
| cg06840042 | 3 | 12598618 | GeneBody/5'UTR/1st exon   | MKRN2      | -5.53±0.472  | -5.834±0.579 | 4.92E-03 |
| cg19100810 | 3 | 12882968 | GeneBody/5'UTR/1st intron | RPL32      | -5.075±0.387 | -5.318±0.365 | 3.72E-03 |
| cg15900519 | 3 | 12883503 | TSS1500                   | RPL32      | -4.028±0.354 | -4.333±0.461 | 3.10E-04 |
| cg17534899 | 3 | 13009509 | TSS1500                   | IQSEC1     | -4.269±0.416 | -4.634±0.649 | 5.11E-04 |
| cg22319470 | 3 | 13521370 | TSS1500                   | HDAC11     | -5.578±0.443 | -5.873±0.626 | 5.53E-03 |
| cg01712016 | 3 | 13521531 | TSS200                    | HDAC11     | -5.13±0.5    | -5.559±0.465 | 1.37E-04 |
| cg10061496 | 3 | 13521655 | TSS200                    | HDAC11     | -5.688±0.505 | -6.048±0.686 | 2.63E-03 |
| cg04969808 | 3 | 13922158 | TSS1500                   | WNT7A      | -3.358±0.188 | -3.511±0.326 | 1.82E-03 |
| cg00661202 | 3 | 14166502 | GeneBody/5'UTR/1st exon   | TMEM43     | -5.434±0.352 | -5.842±0.504 | 6.72E-06 |
| cg13604223 | 3 | 14220055 | GeneBody/1st exon         | XPC        | -5.225±0.596 | -5.718±0.54  | 1.98E-04 |
| cg18946802 | 3 | 14220310 | GeneBody/5'UTR/1st exon   | LSM3       | -4.998±0.479 | -5.455±0.576 | 6.25E-05 |
| cg18357098 | 3 | 14693200 | TSS200                    | CCDC174    | -5.778±0.42  | -6.135±0.442 | 1.91E-04 |
| cg19028369 | 3 | 14693598 | GeneBody/1st intron       | CCDC174    | -4.18±0.241  | -4.331±0.254 | 4.42E-03 |
| cg21255605 | 3 | 14989131 | TSS200                    | NR2C2      | -3.168±0.396 | -3.512±0.434 | 1.57E-04 |
| cg10387901 | 3 | 15106641 | GeneBody/1st exon         | MRPS25     | -4.11±0.431  | -4.429±0.541 | 1.47E-03 |
| cg04228553 | 3 | 15247818 | GeneBody/5'UTR/1st exon   | CAPN7      | -5.841±0.645 | -6.366±0.583 | 2.46E-04 |
| cg09058381 | 3 | 15468845 | GeneBody/5'UTR/1st intron | METTL6     | -4.382±0.346 | -4.732±0.512 | 6.28E-05 |
| cg23912721 | 3 | 15642893 | GeneBody/1st exon         | HACL1      | -4.611±0.52  | -5.025±0.567 | 4.70E-04 |
| cg09848420 | 3 | 16306259 | GeneBody/1st intron       | DPH3       | -4.394±0.232 | -4.629±0.243 | 1.66E-05 |
| cg22688260 | 3 | 16306809 | GeneBody/5'UTR/1st exon   | OXNAD1     | -5.271±0.395 | -5.686±0.475 | 1.52E-05 |
| cg07200280 | 3 | 16554619 | GeneBody/5'UTR/1st intron | RFTN1      | -4.728±0.589 | -5.339±0.591 | 1.10E-05 |
| cg22044848 | 3 | 16555311 | TSS200                    | RFTN1      | -4.256±0.209 | -4.395±0.257 | 3.71E-03 |
| cg18585306 | 3 | 17783491 | GeneBody/5'UTR/1st intron | TBC1D5     | -4.663±0.427 | -5.031±0.447 | 1.60E-04 |
| cg25421694 | 3 | 19988396 | TSS200                    | RAB5A      | -2.408±0.338 | -2.681±0.536 | 1.38E-03 |
| cg12062464 | 3 | 20081582 | GeneBody/5'UTR/1st exon   | KAT2B      | -5.344±0.455 | -5.907±0.686 | 2.91E-06 |
| cg12185908 | 3 | 20227516 | GeneBody/5'UTR/1st intron | SGOL1      | -5.002±0.49  | -5.415±0.515 | 2.13E-04 |
| cg16339185 | 3 | 20227809 | TSS200                    | SGOL1      | -5.236±0.404 | -5.668±0.561 | 2.06E-05 |
| cg14550518 | 3 | 21792938 | TSS200                    | ZNF385D    | -3.996±0.27  | -4.27±0.441  | 9.84E-05 |
| cg15966253 | 3 | 23847480 | GeneBody/5'UTR/1st exon   | UBE2E1     | -4.775±0.42  | -5.146±0.363 | 7.98E-05 |
| cg06949789 | 3 | 23958708 | GeneBody/5'UTR/1st exon   | RPL15      | -5.054±0.349 | -5.404±0.651 | 2.64E-04 |
| cg20855344 | 3 | 23986090 | TSS1500                   | NR1D2      | -2.66±0.321  | -2.46±0.343  | 4.72E-03 |
| cg26124016 | 3 | 25469402 | TSS1500                   | RARB       | -3.512±0.401 | -3.221±0.374 | 9.06E-04 |
| cg02499249 | 3 | 25469720 | TSS200                    | RARB       | -3.541±0.583 | -3.863±0.473 | 8.28E-03 |
| cg09793001 | 3 | 25705530 | GeneBody/1st intron       | TOP2B      | -4.721±0.37  | -5.076±0.526 | 1.09E-04 |
| cg06798189 | 3 | 27498659 | TSS1500                   | SLC4A7     | 1.294±0.291  | 1.064±0.409  | 1.13E-03 |
| cg11356290 | 3 | 28390998 | TSS1500                   | AZ12       | -4.576±0.411 | -5.002±0.435 | 1.28E-05 |
| cg17237063 | 3 | 29323182 | GeneBody/1st exon         | RBMS3      | -4.404±0.567 | -4.756±0.425 | 3.00E-03 |
| cg13859541 | 3 | 30647802 | TSS200                    | TGFBR2     | -4.824±0.387 | -5.14±0.465  | 4.64E-04 |
| cg12541591 | 3 | 30648096 | GeneBody/5'UTR/1st exon   | TGFBR2     | -4.07±0.233  | -4.261±0.256 | 3.42E-04 |
| cg20216935 | 3 | 30648407 | GeneBody/1st exon         | TGFBR2     | -5.042±0.335 | -5.28±0.287  | 9.83E-04 |
| cg15270950 | 3 | 30648819 | GeneBody/1st intron       | TGFBR2     | -4.277±0.168 | -4.382±0.197 | 5.87E-03 |
| cg03256955 | 3 | 30649017 | GeneBody/1st intron       | TGFBR2     | -4.34±0.328  | -4.71±0.435  | 7.25E-06 |
| cg08729012 | 3 | 32543628 | GeneBody/1st intron       | CMTM6      | -3.324±0.431 | -3.624±0.392 | 1.35E-03 |
| cg18602811 | 3 | 32612253 | GeneBody/1st exon         | DYNC11L1   | -3.501±0.231 | -3.714±0.531 | 2.47E-03 |
| cg11786750 | 3 | 32612556 | TSS200                    | DYNC11L1   | -4.562±0.238 | -4.734±0.267 | 1.40E-03 |
| cg05280555 | 3 | 32727089 | GeneBody/1st intron       | CNOT10     | -4.403±0.523 | -4.767±0.624 | 2.29E-03 |
| cg23180365 | 3 | 33138627 | GeneBody/5'UTR/1st exon   | GLB1       | -5.759±0.515 | -6.103±0.58  | 2.92E-03 |
| cg24682740 | 3 | 33481729 | GeneBody/5'UTR/1st exon   | UBP1       | -4.421±0.438 | -4.733±0.583 | 2.54E-03 |
| cg22084336 | 3 | 33482401 | TSS1500                   | UBP1       | -4.846±0.452 | -5.11±0.379  | 5.76E-03 |
| cg18986332 | 3 | 33759647 | GeneBody/5'UTR/1st exon   | CLASP2     | -6.064±0.494 | -6.628±0.605 | 4.35E-06 |
| cg12971958 | 3 | 33839815 | TSS1500                   | PDCD6IP    | -5.262±0.477 | -5.577±0.429 | 2.12E-03 |
| cg02279071 | 3 | 37034154 | GeneBody/1st exon         | EPM2AIP1   | -5.607±0.433 | -5.982±0.442 | 1.39E-04 |
| cg00893636 | 3 | 37034840 | GeneBody/5'UTR/1st exon   | MLH1       | -4.202±0.434 | -4.608±0.397 | 4.12E-05 |
| cg13846866 | 3 | 37035399 | GeneBody/5'UTR/1st intron | MLH1       | -3.716±0.519 | -4.041±0.616 | 5.80E-03 |
| cg22286764 | 3 | 37428639 | 0                         | 0          | 1.724±0.255  | 1.92±0.286   | 7.78E-04 |
| cg13882267 | 3 | 37493203 | TSS1500                   | ITGA9      | -5.209±0.521 | -5.514±0.435 | 5.55E-03 |
| cg17877494 | 3 | 38178256 | GeneBody/1st intron       | ACAA1      | -4.511±0.366 | -4.765±0.429 | 2.29E-03 |
| cg15348640 | 3 | 38179985 | GeneBody/5'UTR/1st exon   | MYD88      | -4.938±0.356 | -5.268±0.5   | 1.68E-04 |
| cg27043630 | 3 | 38180527 | GeneBody/1st intron       | MYD88      | -4.385±0.492 | -4.847±0.623 | 9.25E-05 |
| cg08548888 | 3 | 38180840 | GeneBody/1st intron       | MYD88      | -2.676±0.217 | -2.815±0.273 | 5.51E-03 |
| cg01465620 | 3 | 38496096 | GeneBody/1st exon         | ACVR2B-AS1 | -4.976±0.549 | -5.318±0.482 | 3.59E-03 |
| cg12243255 | 3 | 39194549 | GeneBody/5'UTR/1st intron | CSRNP1     | -5.601±0.477 | -5.976±0.569 | 6.71E-04 |
| cg02921257 | 3 | 39233858 | GeneBody/5'UTR/1st intron | XIRP1      | 1.351±0.185  | 1.467±0.241  | 6.95E-03 |
| cg12413566 | 3 | 39235366 | TSS1500                   | XIRP1      | 2.664±0.253  | 2.841±0.333  | 2.88E-03 |
| cg22917487 | 3 | 39322103 | TSS200                    | CX3CR1     | 2.942±0.279  | 3.129±0.296  | 2.53E-03 |
| cg12534466 | 3 | 39424767 | TSS200                    | SLC25A38   | -4.778±0.532 | -5.168±0.502 | 8.30E-04 |
| cg01798443 | 3 | 39447891 | TSS1500                   | RPSA       | -4.077±0.567 | -4.634±0.558 | 2.38E-05 |
| cg05242945 | 3 | 39447984 | TSS1500                   | RPSA       | -4.545±0.406 | -4.936±0.568 | 9.60E-05 |
| cg27193335 | 3 | 40351750 | TSS1500                   | EIF1B-AS1  | -5.058±0.591 | -5.71±0.627  | 4.90E-06 |
| cg13683864 | 3 | 40499215 | GeneBody/1st intron       | RPL14      | -3.818±0.597 | -4.369±0.766 | 1.23E-04 |
| cg00417297 | 3 | 40518742 | GeneBody/5'UTR/1st exon   | ZNF619     | -5.272±0.47  | -5.564±0.511 | 5.11E-03 |
| cg04180460 | 3 | 41240962 | GeneBody/5'UTR/1st exon   | CTNNB1     | -4.822±0.424 | -4.519±0.542 | 2.16E-03 |
| cg14663065 | 3 | 41241630 | GeneBody/5'UTR/1st intron | CTNNB1     | -4.724±0.322 | -5.024±0.472 | 1.85E-04 |
| cg21463023 | 3 | 42623862 | TSS1500                   | SEC22C     | -4.081±0.287 | -4.331±0.295 | 1.35E-04 |
| cg06953304 | 3 | 42641690 | TSS1500                   | NKTR       | -3.203±0.468 | -3.59±0.554  | 3.70E-04 |
| cg24334879 | 3 | 42642248 | GeneBody/5'UTR/1st exon   | NKTR       | -4.895±0.3   | -5.083±0.275 | 3.46E-03 |
| cg11080718 | 3 | 42846415 | TSS1500                   | HIGD1A     | -2.759±0.245 | -2.975±0.391 | 5.50E-04 |
| cg21979032 | 3 | 42917517 | GeneBody/5'UTR/1st exon   | CYP8B1     | 2.178±0.181  | 2.404±0.313  | 6.03E-06 |
| cg23057732 | 3 | 43147709 | TSS200                    | GTDC2      | -4.31±0.437  | -4.578±0.509 | 6.38E-03 |
| cg08034397 | 3 | 43663512 | GeneBody/5'UTR/1st exon   | ANO10      | -5.152±0.587 | -5.757±0.651 | 1.57E-05 |
| cg12059012 | 3 | 43733234 | GeneBody/1st intron       | ABHD5      | -5.268±0.399 | -5.709±0.548 | 1.16E-05 |
| cg21796234 | 3 | 44379533 | TSS200                    | TCAIM      | -4.79±0.371  | -5.144±0.346 | 3.17E-05 |
| cg12809314 | 3 | 44518785 | GeneBody/5'UTR/1st intron | ZNF445     | -3.364±0.416 | -3.633±0.529 | 5.04E-03 |
| cg15767406 | 3 | 44626029 | TSS1500                   | ZNF660     | -4.565±0.468 | -4.925±0.496 | 6.34E-04 |

|             |   |          |                           |           |              |              |          |
|-------------|---|----------|---------------------------|-----------|--------------|--------------|----------|
| cg24130043  | 3 | 44666362 | TSS200                    | ZNF197    | -4.601±0.33  | -4.869±0.398 | 4.81E-04 |
| cg22050705  | 3 | 44668898 | GeneBody/5'UTR/1st intron | ZNF197    | -5.298±0.667 | -5.731±0.586 | 2.46E-03 |
| cg06186861  | 3 | 44771174 | GeneBody/5'UTR/1st exon   | ZNF501    | -3.525±0.295 | -3.727±0.364 | 2.97E-03 |
| cg21307697  | 3 | 45017012 | GeneBody/5'UTR/1st intron | ZDHHHC3   | -4.538±0.365 | -4.793±0.404 | 1.84E-03 |
| cg04690289  | 3 | 45017999 | GeneBody/1st intron       | EXOSC7    | -4.891±0.484 | -5.373±0.575 | 3.26E-05 |
| cg097770323 | 3 | 45267445 | GeneBody/1st exon         | TMEM158   | -4.06±0.392  | -4.341±0.471 | 1.76E-03 |
| cg12902719  | 3 | 45635223 | TSS1500                   | LIMD1     | -5.02±0.533  | -5.56±0.511  | 1.44E-05 |
| cg03912013  | 3 | 45730489 | TSS200                    | LIMD1-AS1 | -4.599±0.346 | -4.794±0.307 | 7.76E-03 |
| cg15060177  | 3 | 45731018 | GeneBody/1st intron       | SACM1L    | -5.051±0.377 | -5.287±0.357 | 3.74E-03 |
| cg15602950  | 3 | 45731220 | GeneBody/1st intron       | SACM1L    | -4.637±0.338 | -4.927±0.491 | 5.10E-04 |
| cg08186124  | 3 | 45883676 | TSS200                    | LZTFL1    | -4.829±0.308 | -5.018±0.373 | 6.95E-03 |
| cg05670596  | 3 | 46448496 | TSS1500                   | CCRL2     | -1.152±0.203 | -1.307±0.262 | 1.16E-03 |
| cg26536164  | 3 | 46539018 | TSS1500                   | RTP3      | 2.891±0.224  | 3.117±0.349  | 8.62E-05 |
| cg10031651  | 3 | 46621686 | GeneBody                  | TDGF1     | 1.461±0.256  | 1.632±0.357  | 5.18E-03 |
| cg05369142  | 3 | 46735009 | GeneBody/5'UTR/1st exon   | ALS2CL    | -5.99±0.507  | -6.293±0.616 | 8.61E-03 |
| cg15439078  | 3 | 46904643 | GeneBody/1st intron       | MYL3      | 2.97±0.23    | 3.184±0.345  | 2.09E-04 |
| cg24776019  | 3 | 47164921 | GeneBody                  | SETD2     | 1.821±0.274  | 2.009±0.264  | 1.74E-03 |
| cg04255048  | 3 | 47323868 | TSS1500                   | KLHL18    | -4.953±0.43  | -5.306±0.466 | 3.25E-04 |
| cg25757737  | 3 | 47423140 | GeneBody/1st intron       | PTPN23    | -4.647±0.39  | -5.095±0.559 | 7.84E-06 |
| cg14700577  | 3 | 47517001 | GeneBody/5'UTR/1st intron | SCAP      | -5.253±0.426 | -5.711±0.532 | 1.19E-05 |
| cg24832353  | 3 | 47823281 | GeneBody/1st exon         | SMARCC1   | -5.095±0.504 | -5.533±0.567 | 1.74E-04 |
| cg16250355  | 3 | 47823674 | TSS1500                   | SMARCC1   | -4.935±0.401 | -4.7±0.368   | 6.24E-03 |
| cg14758413  | 3 | 47843865 | TSS1500                   | DHX30     | -4.56±0.405  | -4.845±0.507 | 2.28E-03 |
| cg12688043  | 3 | 48129944 | GeneBody/5'UTR/1st intron | MAP4      | -4.166±0.597 | -4.699±0.614 | 1.01E-04 |
| cg04856685  | 3 | 48130799 | TSS200                    | MAP4      | -4.501±0.569 | -4.924±0.605 | 9.25E-04 |
| cg02449978  | 3 | 48230167 | TSS1500                   | CDC25A    | -4.686±0.315 | -4.879±0.293 | 4.35E-03 |
| cg11680236  | 3 | 48342764 | GeneBody/1st intron       | NME6      | -4.571±0.289 | -4.97±0.434  | 4.19E-07 |
| cg11946769  | 3 | 48343235 | TSS1500                   | NME6      | -5.817±0.466 | -6.114±0.437 | 3.25E-03 |
| cg09837648  | 3 | 48466751 | GeneBody/5'UTR/1st intron | PLXNB1    | 1.361±0.26   | 1.533±0.321  | 4.18E-03 |
| cg01538982  | 3 | 48481510 | GeneBody/5'UTR/1st exon   | CCDC51    | -4.753±0.359 | -5.002±0.409 | 2.09E-03 |
| cg25858682  | 3 | 48481793 | GeneBody/1st intron       | TMA7      | -4.994±0.303 | -5.264±0.532 | 7.78E-04 |
| cg27575501  | 3 | 48488423 | TSS200                    | ATRIP     | -4.798±0.311 | -5.215±0.586 | 3.28E-06 |
| cg14633527  | 3 | 48541379 | GeneBody/5'UTR/1st exon   | SHISA5    | -3.289±0.303 | -3.027±0.418 | 3.74E-04 |
| cg26029248  | 3 | 48594205 | GeneBody/1st exon         | PFKFB4    | -5.579±0.415 | -5.851±0.391 | 2.55E-03 |
| cg06049972  | 3 | 48646375 | GeneBody                  | UQCRC1    | -3.62±0.225  | -3.9±0.379   | 5.31E-06 |
| cg07854244  | 3 | 48754518 | GeneBody/5'UTR/1st intron | IP6K2     | -4.325±0.363 | -4.614±0.443 | 6.23E-04 |
| cg23364287  | 3 | 48754776 | TSS200                    | IP6K2     | -5.082±0.56  | -5.583±0.566 | 9.30E-05 |
| cg25927124  | 3 | 48884897 | GeneBody/1st exon         | PRKAR2A   | -5.419±0.507 | -5.828±0.568 | 4.36E-04 |
| cg20159072  | 3 | 48936248 | GeneBody/5'UTR/1st exon   | SLC25A20  | -4.88±0.353  | -5.197±0.381 | 1.01E-04 |
| cg21197973  | 3 | 49027347 | GeneBody/5'UTR/1st exon   | P4HTM     | -5.319±0.697 | -5.956±0.613 | 5.24E-05 |
| cg13415434  | 3 | 49044522 | TSS200                    | WDR6      | -4.277±0.352 | -4.486±0.368 | 6.62E-03 |
| cg21019820  | 3 | 49059209 | GeneBody/5'UTR/1st exon   | NDUFAF3   | -5.285±0.541 | -5.638±0.535 | 2.83E-03 |
| cg06655089  | 3 | 49066738 | GeneBody/1st exon         | IMPDH2    | -6.106±0.455 | -6.704±0.616 | 6.20E-07 |
| cg11819013  | 3 | 49066976 | TSS200                    | IMPDH2    | -5.31±0.528  | -5.931±0.572 | 1.83E-06 |
| cg26475097  | 3 | 49130805 | GeneBody/5'UTR/1st intron | QRICH1    | -4.615±0.437 | -4.891±0.607 | 7.85E-03 |
| cg04197195  | 3 | 49203530 | GeneBody/5'UTR/1st intron | CCDC71    | -5.291±0.535 | -5.8±0.534   | 4.01E-05 |
| cg04005725  | 3 | 49208684 | TSS1500                   | KLHDC8B   | -5.345±0.421 | -5.71±0.444  | 1.49E-04 |
| cg15900980  | 3 | 49395991 | TSS200                    | GPX1      | -3.734±0.3   | -3.982±0.423 | 6.79E-04 |
| cg22907065  | 3 | 49449503 | GeneBody/5'UTR/1st exon   | RHOA      | -5.332±0.667 | -6.073±0.69  | 4.13E-06 |
| cg05055720  | 3 | 49449599 | TSS200                    | TCTA      | -4.497±0.277 | -4.709±0.493 | 3.82E-03 |
| cg26426223  | 3 | 49467287 | TSS1500                   | NICN1     | -3.902±0.362 | -4.198±0.454 | 5.11E-04 |
| cg21475255  | 3 | 49507186 | TSS1500                   | DAG1      | -4.701±0.6   | -5.151±0.606 | 7.50E-04 |
| cg12609467  | 3 | 49508289 | GeneBody/5'UTR/1st intron | DAG1      | -3.943±0.256 | -4.178±0.366 | 2.03E-04 |
| cg08510456  | 3 | 49591008 | GeneBody                  | BSN-AS2   | -0.728±0.273 | -0.449±0.259 | 1.20E-05 |
| cg16933388  | 3 | 49592529 | GeneBody/1st intron       | BSN       | -3.734±0.25  | -3.967±0.448 | 5.12E-04 |
| cg01626197  | 3 | 49761040 | GeneBody/1st exon         | GMPPB     | -5.045±0.487 | -5.374±0.497 | 2.19E-03 |
| cg15565533  | 3 | 49761936 | TSS1500                   | GMPPB     | -4.695±0.443 | -4.984±0.422 | 2.64E-03 |
| cg08563994  | 3 | 49823664 | TSS200                    | IP6K1     | -5.608±0.59  | -5.977±0.491 | 3.19E-03 |
| cg08584430  | 3 | 49824184 | TSS1500                   | IP6K1     | -5.835±0.545 | -6.377±0.586 | 2.49E-05 |
| cg12661229  | 3 | 49840147 | TSS1500                   | FAM212A   | -5.188±0.328 | -5.432±0.336 | 8.27E-04 |
| cg03833566  | 3 | 49841087 | GeneBody/1st intron       | FAM212A   | -3.891±0.308 | -4.119±0.403 | 1.66E-03 |
| cg16970828  | 3 | 49851353 | GeneBody/5'UTR/1st exon   | UBA7      | -4.827±0.449 | -5.133±0.524 | 2.64E-03 |
| cg01090445  | 3 | 49893948 | GeneBody/5'UTR/1st exon   | TRAI      | -4.888±0.508 | -5.335±0.516 | 1.16E-04 |
| cg20162159  | 3 | 49967065 | GeneBody/1st exon         | MON1A     | -5.265±0.35  | -5.506±0.337 | 1.65E-03 |
| cg27088877  | 3 | 49967358 | GeneBody/5'UTR/1st exon   | MON1A     | -6.426±0.57  | -6.823±0.613 | 1.80E-03 |
| cg07808960  | 3 | 49977390 | TSS200                    | RBM6      | -5.959±0.522 | -6.326±0.619 | 2.02E-03 |
| cg04614380  | 3 | 50192449 | TSS1500                   | SEMA3F    | -6.122±0.665 | -6.729±0.663 | 6.86E-05 |
| cg19914607  | 3 | 50242505 | TSS200                    | SLC38A3   | -2.982±0.223 | -3.15±0.332  | 2.09E-03 |
| cg15972294  | 3 | 50273096 | TSS1500                   | GNAI2     | -3.685±0.464 | -3.996±0.358 | 1.56E-03 |
| cg15877314  | 3 | 50273895 | GeneBody/1st intron       | GNAI2     | -4.998±0.5   | -5.452±0.529 | 8.33E-05 |
| cg02657721  | 3 | 50305831 | GeneBody/5'UTR/1st intron | SEMA3B    | -2.466±0.265 | -2.672±0.337 | 9.36E-04 |
| cg10546523  | 3 | 50310484 | GeneBody                  | SEMA3B    | -5.325±0.546 | -5.84±0.651  | 7.07E-05 |
| cg15448599  | 3 | 50315748 | TSS1500                   | LSMEM2    | 3.308±0.192  | 3.431±0.225  | 4.42E-03 |
| cg01413314  | 3 | 50330115 | TSS200                    | IFRD2     | -5.684±0.55  | -6.108±0.546 | 5.50E-04 |
| cg14448864  | 3 | 50336673 | GeneBody/5'UTR/1st exon   | NAT6      | -5.047±0.322 | -5.267±0.407 | 3.18E-03 |
| cg14757296  | 3 | 50349918 | TSS200                    | HYAL1     | 2.459±0.258  | 2.643±0.25   | 1.22E-03 |
| cg17469356  | 3 | 50365875 | TSS1500                   | TUSC2     | -4.534±0.429 | -4.919±0.5   | 1.33E-04 |
| cg26357744  | 3 | 50374304 | GeneBody/1st intron       | RASSF1    | -4.072±0.259 | -4.337±0.395 | 6.19E-05 |
| cg06063729  | 3 | 50374670 | GeneBody/1st exon         | RASSF1    | -3.747±0.197 | -3.976±0.404 | 6.60E-05 |
| cg11035216  | 3 | 50374929 | TSS200                    | RASSF1    | -6.016±0.608 | -6.508±0.514 | 2.30E-04 |
| cg03703325  | 3 | 50606864 | TSS200                    | HEMK1     | -5.035±0.364 | -5.527±0.605 | 1.12E-06 |
| cg12005703  | 3 | 50607201 | GeneBody/5'UTR/1st intron | HEMK1     | -4.768±0.511 | -5.115±0.548 | 2.30E-03 |
| cg08996521  | 3 | 50649994 | GeneBody/5'UTR/1st intron | MAPKAPK3  | -4.077±0.274 | -4.337±0.403 | 1.44E-04 |
| cg25716871  | 3 | 50654228 | TSS1500                   | MAPKAPK3  | -4.832±0.334 | -5.086±0.481 | 1.68E-03 |
| cg17804987  | 3 | 50654788 | GeneBody/5'UTR/1st intron | MAPKAPK3  | -6.077±0.502 | -6.598±0.592 | 1.71E-05 |
| cg18501026  | 3 | 50712096 | TSS1500                   | MIR4787   | -2.847±0.257 | -3.022±0.318 | 3.15E-03 |
| cg10029076  | 3 | 51423232 | GeneBody/1st intron       | MANF      | -4.257±0.374 | -4.546±0.436 | 7.91E-04 |
| cg15821095  | 3 | 51428079 | TSS1500                   | RBM15B    | 1.848±0.191  | 2.006±0.242  | 4.71E-04 |
| cg25675349  | 3 | 51705680 | GeneBody/1st exon         | TEX264    | -5.412±0.358 | -5.867±0.551 | 1.99E-06 |
| cg13685294  | 3 | 51743318 | GeneBody/5'UTR/1st intron | GRM2      | 3.527±0.26   | 3.84±0.389   | 4.50E-06 |
| cg23013392  | 3 | 51976224 | TSS200                    | PARP3     | -4.621±0.302 | -4.812±0.26  | 3.00E-03 |
| cg15271594  | 3 | 52029932 | GeneBody/5'UTR/1st exon   | RPL29     | -4.324±0.29  | -4.608±0.411 | 8.05E-05 |
| cg22863122  | 3 | 52090142 | GeneBody/1st exon         | DUSP7     | -5.491±0.414 | -5.941±0.652 | 3.19E-05 |
| cg04262565  | 3 | 52091063 | TSS1500                   | DUSP7     | -4.737±0.358 | -5.014±0.453 | 9.49E-04 |
| cg22534599  | 3 | 52232234 | GeneBody/5'UTR/1st exon   | ALAS1     | -6.273±0.594 | -6.642±0.512 | 3.55E-03 |

|            |   |           |                           |         |              |              |          |
|------------|---|-----------|---------------------------|---------|--------------|--------------|----------|
| cg03890877 | 3 | 52272690  | GeneBody/1st intron       | TWF2    | -4.595±0.356 | -4.923±0.48  | 1.49E-04 |
| cg17386185 | 3 | 52321266  | TSS1500                   | GLYCTK  | -1.847±0.204 | -2.154±0.317 | 8.89E-08 |
| cg26738080 | 3 | 52487733  | GeneBody/1st intron       | TNNC1   | 1.215±0.135  | 1.351±0.2    | 7.57E-05 |
| cg22557067 | 3 | 52489763  | GeneBody/1st intron       | NISCH   | -4.822±0.623 | -5.577±0.71  | 1.31E-06 |
| cg25103286 | 3 | 52583646  | GeneBody                  | PBRM1   | 2.359±0.222  | 2.515±0.285  | 2.51E-03 |
| cg11041457 | 3 | 52719354  | GeneBody/5'UTR/1st intron | PBRM1   | -2.722±0.471 | -3.174±0.575 | 6.29E-05 |
| cg09307279 | 3 | 52739927  | GeneBody/5'UTR/1st exon   | SPCS1   | -5.819±0.493 | -6.298±0.626 | 5.99E-05 |
| cg20141751 | 3 | 52740234  | TSS200                    | GLT8D1  | -5.271±0.532 | -5.688±0.534 | 4.69E-04 |
| cg12417299 | 3 | 52804560  | GeneBody/1st intron       | NEK4    | -5.311±0.448 | -5.728±0.43  | 4.77E-05 |
| cg26099316 | 3 | 52828794  | GeneBody/5'UTR/1st exon   | ITIH3   | 1.157±0.179  | 1.281±0.205  | 2.22E-03 |
| cg19373170 | 3 | 53079105  | GeneBody/5'UTR/1st intron | SFMBT1  | -4.842±0.33  | -5.17±0.537  | 1.34E-04 |
| cg19008809 | 3 | 53080682  | TSS1500                   | SFMBT1  | -4.431±0.334 | -4.659±0.375 | 2.39E-03 |
| cg13908523 | 3 | 53194728  | TSS1500                   | PRKCD   | -5.679±0.49  | -5.966±0.425 | 5.66E-03 |
| cg20472433 | 3 | 53289400  | GeneBody/1st intron       | TKT     | -4.258±0.313 | -4.477±0.44  | 3.65E-03 |
| cg07454215 | 3 | 53381805  | TSS200                    | DCP1A   | -5.228±0.44  | -5.606±0.443 | 1.56E-04 |
| cg07356771 | 3 | 53879950  | GeneBody/5'UTR/1st intron | CHDH    | -4.108±0.305 | -4.339±0.503 | 2.99E-03 |
| cg15757271 | 3 | 55521789  | TSS200                    | WNT5A   | -4.835±0.321 | -5.257±0.472 | 8.79E-07 |
| cg01819572 | 3 | 57204530  | 0                         | 0       | -4.281±0.339 | -4.583±0.408 | 1.50E-04 |
| cg09433780 | 3 | 57262354  | GeneBody/1st intron       | APPL1   | -3.423±0.215 | -3.623±0.308 | 1.76E-04 |
| cg00777555 | 3 | 57583074  | GeneBody/5'UTR/1st exon   | ARF4    | -5.42±0.422  | -5.707±0.488 | 2.69E-03 |
| cg13423394 | 3 | 58223060  | TSS200                    | ABHD6   | -3.772±0.241 | -3.623±0.285 | 6.31E-03 |
| cg11485602 | 3 | 58419482  | GeneBody/1st exon         | PDHB    | -5.63±0.487  | -5.909±0.469 | 7.84E-03 |
| cg00917893 | 3 | 58419781  | TSS1500                   | PDHB    | -5.115±0.53  | -5.51±0.58   | 8.30E-04 |
| cg02194211 | 3 | 58652346  | GeneBody/5'UTR/1st exon   | FAM3D   | 1.891±0.159  | 1.788±0.207  | 5.15E-03 |
| cg19049316 | 3 | 61237063  | GeneBody/5'UTR/1st exon   | FHIT    | -3.396±0.245 | -3.567±0.355 | 3.83E-03 |
| cg24796403 | 3 | 61237172  | TSS200                    | FHIT    | -4.87±0.494  | -5.14±0.443  | 9.99E-03 |
| cg11158760 | 3 | 61237270  | TSS200                    | FHIT    | -3.682±0.264 | -3.856±0.255 | 2.48E-03 |
| cg09473585 | 3 | 62305519  | GeneBody/5'UTR/1st intron | C3orf14 | 1.787±0.264  | 1.962±0.354  | 4.97E-03 |
| cg27462371 | 3 | 63850464  | GeneBody/5'UTR/1st exon   | ATXN7   | -4.19±0.346  | -4.408±0.43  | 6.08E-03 |
| cg26567442 | 3 | 64008758  | GeneBody/1st intron       | PSMD6   | -4.171±0.246 | -4.504±0.464 | 2.81E-06 |
| cg00676660 | 3 | 64672609  | GeneBody                  | ADAMTS9 | -4.78±0.437  | -5.222±0.587 | 4.24E-05 |
| cg12187213 | 3 | 64673741  | TSS1500                   | ADAMTS9 | -5.003±0.348 | -5.24±0.333  | 1.79E-03 |
| cg13725272 | 3 | 66024492  | GeneBody/5'UTR/1st exon   | MAGI1   | -5.691±0.408 | -5.986±0.407 | 1.09E-03 |
| cg26131019 | 3 | 66550735  | GeneBody/1st exon         | LRIG1   | -3.862±0.797 | -4.634±0.814 | 3.21E-05 |
| cg00830393 | 3 | 66552063  | TSS1500                   | LRIG1   | -4.611±0.349 | -5.024±0.511 | 5.32E-06 |
| cg18304195 | 3 | 67049586  | GeneBody                  | KBTBD8  | -3.252±0.538 | -3.579±0.54  | 5.35E-03 |
| cg21785536 | 3 | 69063328  | TSS1500                   | EOGT    | -3.533±0.429 | -3.831±0.434 | 1.63E-03 |
| cg09920145 | 3 | 69100714  | GeneBody/1st intron       | TMF1    | -4.852±0.418 | -5.241±0.522 | 9.91E-05 |
| cg25436946 | 3 | 69101463  | GeneBody/5'UTR/1st exon   | TMF1    | -4.857±0.454 | -5.192±0.646 | 2.21E-03 |
| cg24077317 | 3 | 69129461  | GeneBody/1st intron       | UBA3    | -5.789±0.667 | -6.36±0.633  | 1.42E-04 |
| cg09620798 | 3 | 69129705  | TSS200                    | UBA3    | -3.919±0.445 | -4.223±0.551 | 3.01E-03 |
| cg24336531 | 3 | 69134303  | GeneBody/1st exon         | ARL6IP5 | -5.017±0.359 | -5.269±0.374 | 1.58E-03 |
| cg00838150 | 3 | 69788442  | TSS200                    | MITF    | -4.467±0.341 | -4.818±0.46  | 3.37E-05 |
| cg24980458 | 3 | 71632677  | GeneBody/5'UTR/1st intron | FOXP1   | -4.684±0.319 | -4.92±0.274  | 6.48E-04 |
| cg15798455 | 3 | 71833907  | GeneBody/1st intron       | PROK2   | -3.949±0.338 | -4.188±0.433 | 2.35E-03 |
| cg08555612 | 3 | 71834640  | TSS1500                   | PROK2   | -4.145±0.301 | -4.558±0.479 | 6.57E-07 |
| cg09013626 | 3 | 72495672  | GeneBody/1st exon         | RYBP    | -3.813±0.272 | -3.992±0.275 | 2.64E-03 |
| cg07356753 | 3 | 81810745  | GeneBody/5'UTR/1st exon   | GBE1    | -5.502±0.825 | -6.042±0.701 | 2.17E-03 |
| cg22470827 | 3 | 87276743  | GeneBody/1st intron       | CHMP2B  | -5.145±0.401 | -5.549±0.529 | 4.00E-05 |
| cg12775613 | 3 | 88040034  | GeneBody                  | HTR1F   | 2.462±0.277  | 2.691±0.263  | 2.17E-04 |
| cg27286107 | 3 | 88108209  | TSS200                    | CGGBP1  | -5.377±0.346 | -5.735±0.497 | 3.91E-05 |
| cg15562197 | 3 | 88198982  | GeneBody/5'UTR/1st exon   | CGGBP1  | -4.398±0.333 | -4.607±0.418 | 6.39E-03 |
| cg04177705 | 3 | 88199274  | TSS1500                   | CGGBP1  | -5.201±0.4   | -5.835±0.576 | 1.94E-08 |
| cg22619563 | 3 | 89156830  | GeneBody/5'UTR/1st exon   | EPHA3   | -4.487±0.349 | -4.719±0.391 | 3.06E-03 |
| cg19774491 | 3 | 93692501  | GeneBody/1st intron       | PROS1   | -4.338±0.321 | -4.639±0.396 | 8.51E-05 |
| cg04032566 | 3 | 93780446  | GeneBody/5'UTR            | DHFR1   | 3.67±0.318   | 3.856±0.382  | 9.83E-03 |
| cg17767184 | 3 | 93782171  | TSS200                    | DHFR1   | -3.788±0.406 | -4.136±0.43  | 1.78E-04 |
| cg18182358 | 3 | 98451002  | TSS200                    | ST3GAL6 | -3.313±0.386 | -3.552±0.516 | 8.16E-03 |
| cg04251363 | 3 | 98452218  | GeneBody/1st intron       | ST3GAL6 | -5.339±0.597 | -5.84±0.57   | 1.85E-04 |
| cg03277051 | 3 | 99356666  | TSS1500                   | COL8A1  | -4.347±0.31  | -4.555±0.331 | 2.60E-03 |
| cg15372098 | 3 | 99537053  | GeneBody/1st intron       | CMSS1   | -4.653±0.374 | -4.981±0.476 | 2.29E-04 |
| cg15994781 | 3 | 100120402 | TSS200                    | TOMM70A | -4.438±0.434 | -4.842±0.567 | 1.17E-04 |
| cg17127587 | 3 | 100211127 | TSS1500                   | TMEM45A | -4.007±0.416 | -4.345±0.565 | 7.06E-04 |
| cg10661591 | 3 | 100428033 | TSS200                    | TFG     | -4.056±0.473 | -4.398±0.582 | 1.75E-03 |
| cg18213440 | 3 | 100428172 | TSS200                    | TFG     | -5.051±0.463 | -5.483±0.543 | 7.97E-05 |
| cg21322149 | 3 | 101232006 | GeneBody/5'UTR/1st exon   | SENPF   | -5.177±0.521 | -5.639±0.491 | 8.91E-05 |
| cg24801210 | 3 | 101293432 | GeneBody/1st intron       | PCNP    | -2.934±0.482 | -2.537±0.464 | 2.37E-04 |
| cg03072102 | 3 | 101443408 | TSS200                    | CEP97   | -4.557±0.394 | -4.835±0.487 | 2.20E-03 |
| cg03919644 | 3 | 101443603 | GeneBody/1st intron       | CEP97   | -4.419±0.372 | -4.874±0.44  | 1.23E-06 |
| cg06073471 | 3 | 101497857 | TSS200                    | NXPE3   | -4.717±0.407 | -5.031±0.529 | 1.08E-03 |
| cg15646782 | 3 | 101498416 | GeneBody/5'UTR/1st exon   | NXPE3   | -4.78±0.469  | -5.277±0.499 | 9.43E-06 |
| cg26284390 | 3 | 101546697 | TSS200                    | NFKBIZ  | -2.843±0.384 | -2.517±0.641 | 1.01E-03 |
| cg01913908 | 3 | 102154676 | GeneBody/1st intron       | ZPLD1   | 1.833±0.159  | 1.949±0.253  | 3.82E-03 |
| cg16338347 | 3 | 105085463 | TSS200                    | ALCAM   | -4.146±0.316 | -4.34±0.314  | 4.63E-03 |
| cg02582608 | 3 | 105085991 | GeneBody/5'UTR/1st exon   | ALCAM   | -4.718±0.536 | -5.154±0.515 | 2.77E-04 |
| cg00522034 | 3 | 105587721 | GeneBody/5'UTR/1st exon   | CBLB    | -6.478±0.605 | -6.946±0.578 | 4.83E-04 |
| cg17468841 | 3 | 105588020 | TSS200                    | CBLB    | -5.76±0.405  | -6.259±0.553 | 1.88E-06 |
| cg03262918 | 3 | 107241738 | TSS200                    | BBX     | -5.03±0.342  | -5.236±0.385 | 6.83E-03 |
| cg06806080 | 3 | 107810791 | TSS1500                   | CD47    | 2.458±0.22   | 2.608±0.26   | 2.59E-03 |
| cg11390468 | 3 | 107940784 | GeneBody/1st intron       | IFT57   | -4.01±0.368  | -4.241±0.468 | 6.51E-03 |
| cg03402775 | 3 | 108308147 | TSS200                    | DZIP3   | -4.973±0.587 | -5.438±0.513 | 3.23E-04 |
| cg19522294 | 3 | 110790583 | TSS200                    | PVRL3   | -4.242±0.43  | -4.561±0.535 | 1.40E-03 |
| cg18413240 | 3 | 112280241 | GeneBody/1st intron       | ATG3    | -4.934±0.371 | -5.188±0.344 | 1.61E-03 |
| cg19538699 | 3 | 112281021 | GeneBody/5'UTR/1st exon   | SLC35A5 | -4.853±0.32  | -5.247±0.441 | 2.00E-06 |
| cg21307628 | 3 | 112360952 | TSS1500                   | CCDC80  | 1.519±0.23   | 1.691±0.276  | 1.23E-03 |
| cg04070847 | 3 | 112693867 | GeneBody/5'UTR/1st exon   | CD200R1 | -1.476±0.254 | -1.622±0.278 | 9.26E-03 |
| cg15416577 | 3 | 113234093 | TSS200                    | SPICE1  | -5.114±0.448 | -5.549±0.456 | 3.15E-05 |
| cg13199822 | 3 | 113466193 | GeneBody/5'UTR/1st intron | ATP6V1A | -4.929±0.38  | -5.209±0.361 | 8.07E-04 |
| cg26107778 | 3 | 113775778 | GeneBody/1st intron       | QTRTD1  | -4.809±0.338 | -5.134±0.477 | 1.02E-04 |
| cg26152597 | 3 | 114865874 | GeneBody/5'UTR/1st intron | ZBTB20  | -5.283±0.682 | -5.839±0.643 | 2.62E-04 |
| cg16515820 | 3 | 114866447 | TSS1500                   | ZBTB20  | -4.183±0.246 | -4.318±0.204 | 9.23E-03 |
| cg14294758 | 3 | 116163694 | GeneBody/1st intron       | LSAMP   | -3.033±0.286 | -3.219±0.387 | 5.78E-03 |
| cg24650229 | 3 | 118864825 | GeneBody/5'UTR/1st exon   | IGSF11  | 3.55±0.265   | 3.726±0.364  | 5.04E-03 |
| cg05008406 | 3 | 118959563 | GeneBody/5'UTR/1st intron | B4GALT4 | -5.629±0.477 | -6.213±0.686 | 2.79E-06 |
| cg14602658 | 3 | 119182282 | GeneBody/5'UTR/1st exon   | TMEM39A | -4.765±0.411 | -5.237±0.543 | 5.25E-06 |

|            |   |           |                           |                     |              |              |          |
|------------|---|-----------|---------------------------|---------------------|--------------|--------------|----------|
| cg25345005 | 3 | 119187891 | GeneBody/1st exon         | <i>POGLUT1</i>      | -5.662±0.527 | -5.957±0.464 | 8.25E-03 |
| cg14399078 | 3 | 119298802 | GeneBody/5'UTR/1st intron | <i>ADPRH</i>        | -5.532±0.455 | -5.993±0.527 | 2.33E-05 |
| cg26808606 | 3 | 119396217 | GeneBody/5'UTR/1st exon   | <i>COX17</i>        | -0.447±0.128 | -0.535±0.145 | 2.18E-03 |
| cg11951446 | 3 | 119396386 | TSS200                    | <i>COX17</i>        | -3.594±0.524 | -3.975±0.629 | 1.51E-03 |
| cg06648029 | 3 | 119499749 | GeneBody/5'UTR/1st exon   | <i>NR1I2</i>        | 3.252±0.197  | 3.379±0.2    | 3.31E-03 |
| cg10347998 | 3 | 119812602 | GeneBody/5'UTR/1st exon   | <i>GSK3B</i>        | -5.298±0.388 | -5.638±0.53  | 3.09E-04 |
| cg19093820 | 3 | 119963208 | TSS200                    | <i>GPR156</i>       | -2.882±0.41  | -3.166±0.391 | 1.48E-03 |
| cg22182110 | 3 | 121468645 | TSS200                    | <i>GOLGB1</i>       | -3.679±0.234 | -3.85±0.301  | 1.74E-03 |
| cg12780286 | 3 | 121553586 | GeneBody/5'UTR/1st intron | <i>IQCB1</i>        | -4.827±0.431 | -5.098±0.39  | 3.50E-03 |
| cg17133388 | 3 | 122102727 | TSS1500                   | <i>FAM162A</i>      | -4.163±0.296 | -4.388±0.337 | 8.91E-04 |
| cg17324707 | 3 | 122103153 | GeneBody/1st intron       | <i>FAM162A</i>      | -5.672±0.464 | -6.079±0.472 | 1.24E-04 |
| cg21171373 | 3 | 122134914 | TSS200                    | <i>WDR5B</i>        | -5.246±0.6   | -5.728±0.511 | 2.61E-04 |
| cg04741636 | 3 | 122283583 | TSS200                    | <i>PARP9</i>        | -2.97±0.322  | -3.185±0.416 | 4.03E-03 |
| cg07200897 | 3 | 122512821 | TSS200                    | <i>HSPBAP1</i>      | -4.475±0.476 | -4.837±0.571 | 9.63E-04 |
| cg04565661 | 3 | 122747440 | GeneBody/1st exon         | <i>SEMA5B</i>       | -5.222±0.424 | -5.473±0.334 | 4.72E-03 |
| cg00212549 | 3 | 122747620 | TSS200                    | <i>SEMA5B</i>       | -3.465±0.374 | -3.749±0.469 | 1.14E-03 |
| cg09618682 | 3 | 122921198 | GeneBody/5'UTR/1st intron | <i>SEC22A</i>       | -4.441±0.381 | -4.691±0.35  | 2.30E-03 |
| cg03731616 | 3 | 123603618 | TSS1500                   | <i>MYLK</i>         | -2.351±0.165 | -2.582±0.303 | 1.28E-06 |
| cg13144004 | 3 | 124449104 | TSS200                    | <i>UMPS</i>         | -5.753±0.573 | -6.226±0.57  | 2.49E-04 |
| cg00821764 | 3 | 124449680 | GeneBody/1st intron       | <i>UMPS</i>         | -5.396±0.364 | -5.67±0.513  | 1.83E-03 |
| cg21664828 | 3 | 125094611 | TSS1500                   | <i>ZNF148</i>       | -3.377±0.293 | -3.581±0.258 | 1.30E-03 |
| cg12373072 | 3 | 125313773 | GeneBody/5'UTR/1st exon   | <i>OSBPL11</i>      | -3.169±0.429 | -3.57±0.373  | 3.93E-05 |
| cg26436315 | 3 | 126075385 | GeneBody/5'UTR/1st intron | <i>KLF15</i>        | -4.599±0.398 | -4.983±0.547 | 9.08E-05 |
| cg17305187 | 3 | 126076601 | TSS1500                   | <i>KLF15</i>        | -4.213±0.337 | -4.614±0.484 | 4.42E-06 |
| cg07745434 | 3 | 126243401 | GeneBody/1st intron       | <i>CHST13</i>       | -2.769±0.187 | -2.93±0.304  | 8.25E-04 |
| cg13264208 | 3 | 127770926 | TSS1500                   | <i>SEC61A1</i>      | -4.774±0.386 | -4.984±0.292 | 8.54E-03 |
| cg18043455 | 3 | 127771761 | GeneBody                  | <i>SEC61A1</i>      | -4.108±0.321 | -4.375±0.437 | 5.43E-04 |
| cg16672449 | 3 | 127842622 | GeneBody/5'UTR/1st exon   | <i>RUVBL1</i>       | -4.877±0.267 | -5.046±0.352 | 6.81E-03 |
| cg22068211 | 3 | 128295141 | TSS1500                   | <i>C3orf27</i>      | 2.269±0.213  | 2.408±0.319  | 7.67E-03 |
| cg27662379 | 3 | 128369753 | TSS200                    | <i>RPN1</i>         | -5.758±0.529 | -6.179±0.586 | 4.96E-04 |
| cg15687659 | 3 | 128445120 | GeneBody/5'UTR/1st exon   | <i>RAB7A</i>        | -4.869±0.402 | -5.108±0.485 | 8.84E-03 |
| cg14470209 | 3 | 128598183 | TSS200                    | <i>ACAD9</i>        | -5.289±0.415 | -5.719±0.364 | 8.96E-06 |
| cg25378769 | 3 | 128998233 | GeneBody/5'UTR/1st intron | <i>C3orf37</i>      | -5.398±0.451 | -5.829±0.441 | 3.59E-05 |
| cg12276904 | 3 | 129035177 | TSS200                    | <i>H1FX</i>         | -4.687±0.512 | -5.145±0.539 | 1.01E-04 |
| cg26347745 | 3 | 129159008 | GeneBody/5'UTR/1st exon   | <i>MBD4</i>         | -4.341±0.208 | -4.51±0.235  | 4.06E-04 |
| cg24770850 | 3 | 129325130 | GeneBody/1st exon         | <i>PLXND1</i>       | -5.63±0.481  | -5.931±0.535 | 5.18E-03 |
| cg04167054 | 3 | 130613906 | GeneBody/1st intron       | <i>ATP2C1</i>       | -4.951±0.514 | -5.351±0.476 | 4.25E-04 |
| cg26459500 | 3 | 131100418 | TSS200                    | <i>NUDT16</i>       | -3.481±0.282 | -3.678±0.379 | 3.19E-03 |
| cg05911610 | 3 | 131221850 | GeneBody/5'UTR/1st exon   | <i>MRPL3</i>        | -5.663±0.644 | -6.242±0.703 | 1.03E-04 |
| cg00881086 | 3 | 132441942 | TSS1500                   | <i>NPHP3-ACAD11</i> | -4.075±0.295 | -4.274±0.328 | 2.60E-03 |
| cg02387613 | 3 | 133380479 | GeneBody/5'UTR/1st intron | <i>TOPBP1</i>       | -5.226±0.414 | -5.517±0.352 | 1.09E-03 |
| cg03751799 | 3 | 133524437 | GeneBody/5'UTR/1st intron | <i>SRPRB</i>        | -4.076±0.524 | -4.463±0.539 | 9.15E-04 |
| cg19875216 | 3 | 133524841 | GeneBody                  | <i>SRPRB</i>        | -6.168±0.609 | -6.8±0.629   | 1.14E-05 |
| cg20591405 | 3 | 133614578 | GeneBody/5'UTR/1st exon   | <i>RAB6B</i>        | -5.462±0.705 | -5.982±0.786 | 1.13E-03 |
| cg18989919 | 3 | 133648584 | GeneBody/5'UTR/1st exon   | <i>C3orf36</i>      | 3.017±0.165  | 3.127±0.178  | 2.87E-03 |
| cg07708788 | 3 | 133748311 | GeneBody/1st intron       | <i>SLC02A1</i>      | -4.42±0.456  | -4.753±0.585 | 1.77E-03 |
| cg25420398 | 3 | 133968920 | GeneBody/1st intron       | <i>RYK</i>          | -3.95±0.501  | -3.567±0.501 | 5.97E-04 |
| cg05951646 | 3 | 133970101 | TSS1500                   | <i>RYK</i>          | -4.051±0.381 | -4.33±0.447  | 1.34E-03 |
| cg08115510 | 3 | 134092715 | GeneBody/5'UTR/1st intron | <i>AMOTL2</i>       | -4.079±0.397 | -4.509±0.468 | 8.81E-06 |
| cg13798579 | 3 | 134204398 | TSS200                    | <i>CEP63</i>        | -4.61±0.26   | -4.794±0.258 | 1.35E-03 |
| cg18871670 | 3 | 134205507 | GeneBody/5'UTR/1st intron | <i>CEP63</i>        | -5.327±0.481 | -5.635±0.433 | 2.87E-03 |
| cg18150721 | 3 | 134514881 | GeneBody/1st intron       | <i>EPHB1</i>        | -4.507±0.32  | -4.712±0.493 | 9.34E-03 |
| cg06465926 | 3 | 135685042 | GeneBody/5'UTR/1st intron | <i>PPP2R3A</i>      | -3.556±0.203 | -3.816±0.362 | 4.91E-06 |
| cg18932540 | 3 | 136471803 | TSS1500                   | <i>STAG1</i>        | -5.547±0.505 | -5.944±0.482 | 4.15E-04 |
| cg15980408 | 3 | 136538141 | GeneBody/5'UTR/1st intron | <i>SLC35G2</i>      | -5.948±0.543 | -6.535±0.666 | 1.04E-05 |
| cg02975259 | 3 | 136581033 | TSS200                    | <i>NCK1</i>         | -6.062±0.396 | -6.398±0.421 | 2.07E-04 |
| cg02044161 | 3 | 136675705 | TSS1500                   | <i>IL20RB</i>       | 2.698±0.184  | 2.815±0.185  | 3.65E-03 |
| cg21538194 | 3 | 137834582 | TSS200                    | <i>DZIP1L</i>       | -4.405±0.374 | -4.673±0.486 | 2.20E-03 |
| cg13272327 | 3 | 137906213 | GeneBody/5'UTR/1st exon   | <i>ARMC8</i>        | -5.368±0.488 | -5.698±0.45  | 1.77E-03 |
| cg18047509 | 3 | 138313341 | TSS1500                   | <i>CEP70</i>        | -4.717±0.373 | -5.048±0.547 | 3.49E-04 |
| cg04148458 | 3 | 138327707 | GeneBody/5'UTR/1st exon   | <i>FAIM</i>         | -4.917±0.303 | -5.205±0.53  | 3.62E-04 |
| cg14312526 | 3 | 138665291 | GeneBody/1st exon         | <i>FOXL2</i>        | -2.829±0.337 | -3.048±0.442 | 5.51E-03 |
| cg20630151 | 3 | 138823086 | GeneBody/1st exon         | <i>BPESC1</i>       | 1.932±0.331  | 2.136±0.316  | 4.27E-03 |
| cg22451189 | 3 | 139062925 | GeneBody/1st exon         | <i>MRPS22</i>       | -5.112±0.441 | -5.606±0.532 | 5.46E-06 |
| cg09650667 | 3 | 139108740 | TSS1500                   | <i>COPB2</i>        | -5.269±0.383 | -5.765±0.442 | 4.73E-07 |
| cg25152631 | 3 | 140660955 | GeneBody/1st intron       | <i>SLC25A36</i>     | -4.902±0.477 | -5.221±0.61  | 3.87E-03 |
| cg16418163 | 3 | 140950828 | GeneBody/5'UTR/1st intron | <i>ACPL2</i>        | -5.496±0.51  | -5.896±0.672 | 9.42E-04 |
| cg10958402 | 3 | 141456882 | TSS200                    | <i>RNF7</i>         | -4.739±0.455 | -5.027±0.394 | 3.05E-03 |
| cg25264554 | 3 | 142166789 | GeneBody/5'UTR/1st exon   | <i>XRN1</i>         | -4.015±0.334 | -4.324±0.392 | 8.56E-05 |
| cg03245962 | 3 | 142167057 | TSS1500                   | <i>XRN1</i>         | -4.666±0.496 | -5.105±0.439 | 8.17E-05 |
| cg20636078 | 3 | 142298018 | TSS1500                   | <i>ATR</i>          | -4.713±0.448 | -5.055±0.447 | 6.13E-04 |
| cg07067241 | 3 | 142442711 | TSS1500                   | <i>TRPC1</i>        | -4.378±0.63  | -4.943±0.565 | 7.10E-05 |
| cg26301689 | 3 | 142681704 | GeneBody/1st exon         | <i>PAQR9</i>        | 5.103±0.486  | 5.494±0.483  | 3.34E-04 |
| cg00995327 | 3 | 142838847 | GeneBody/5'UTR/1st exon   | <i>CHST2</i>        | 2.469±0.166  | -3.65±0.319  | 1.02E-04 |
| cg15051063 | 3 | 142893947 | 0                         | 0                   | 2.541±0.207  | 2.734±0.324  | 2.49E-04 |
| cg16794633 | 3 | 143690145 | TSS1500                   | <i>C3orf58</i>      | -4.451±0.419 | -4.705±0.352 | 4.25E-03 |
| cg20586531 | 3 | 146263147 | TSS1500                   | <i>PLSCR1</i>       | 1.812±0.21   | 1.944±0.267  | 6.55E-03 |
| cg10524983 | 3 | 148708929 | TSS1500                   | <i>GYG1</i>         | -3.621±0.342 | -3.869±0.551 | 3.91E-03 |
| cg19751951 | 3 | 148709802 | GeneBody/1st intron       | <i>GYG1</i>         | -5.538±0.483 | -5.847±0.568 | 4.60E-03 |
| cg22800191 | 3 | 148847598 | GeneBody/1st exon         | <i>HPS3</i>         | -4.867±0.569 | -5.205±0.516 | 5.49E-03 |
| cg24078828 | 3 | 149375789 | GeneBody/5'UTR/1st exon   | <i>VWTR1</i>        | -5.483±0.528 | -5.802±0.569 | 6.45E-03 |
| cg19332303 | 3 | 149469910 | GeneBody                  | <i>COMMD2</i>       | -4.601±0.43  | -4.928±0.468 | 7.68E-04 |
| cg18759346 | 3 | 149470375 | TSS200                    | <i>COMMD2</i>       | -4.121±0.399 | -4.37±0.492  | 6.37E-03 |
| cg24353466 | 3 | 149530978 | GeneBody/5'UTR/1st exon   | <i>RNF13</i>        | -5.924±0.57  | -6.336±0.499 | 8.55E-04 |
| cg02929869 | 3 | 149688583 | GeneBody/1st exon         | <i>PFN2</i>         | -5.786±0.602 | -6.201±0.476 | 1.22E-03 |
| cg15584630 | 3 | 150126560 | TSS1500                   | <i>TSC22D2</i>      | -5.824±0.572 | -6.175±0.582 | 5.03E-03 |
| cg14056942 | 3 | 150127151 | GeneBody/1st exon         | <i>TSC22D2</i>      | -3.793±0.22  | -3.947±0.354 | 5.24E-03 |
| cg04605667 | 3 | 150481783 | TSS1500                   | <i>SLAH2</i>        | -3.649±0.546 | -4.027±0.548 | 1.68E-03 |
| cg12775479 | 3 | 151176684 | TSS200                    | <i>IGSF10</i>       | 2.698±0.255  | 2.835±0.2    | 9.53E-03 |
| cg08570275 | 3 | 152553089 | GeneBody/5'UTR/1st exon   | <i>P2RY1</i>        | -4.408±0.51  | -4.88±0.667  | 1.27E-04 |
| cg20555138 | 3 | 152879629 | TSS1500                   | <i>RAP2B</i>        | -3.662±0.366 | -3.398±0.397 | 1.32E-03 |
| cg22034555 | 3 | 154042159 | GeneBody/1st exon         | <i>DHX36</i>        | -4.308±0.298 | -4.535±0.297 | 6.31E-04 |
| cg22183849 | 3 | 154042356 | TSS200                    | <i>DHX36</i>        | -5.452±0.393 | -5.893±0.483 | 5.87E-06 |
| cg22572214 | 3 | 155572542 | TSS1500                   | <i>SLC33A1</i>      | -4.451±0.439 | -4.859±0.597 | 1.42E-04 |
| cg01634119 | 3 | 155588010 | TSS1500                   | <i>GMPS</i>         | -4.48±0.486  | -4.785±0.608 | 6.35E-03 |

|            |   |           |                           |          |              |              |          |
|------------|---|-----------|---------------------------|----------|--------------|--------------|----------|
| cg15423862 | 3 | 155838109 | TSS1500                   | KCNAB1   | 2.797±0.253  | 2.938±0.21   | 7.91E-03 |
| cg24262469 | 3 | 156391694 | TSS1500                   | TIPARP   | -1.817±0.306 | -1.434±0.431 | 1.73E-06 |
| cg22114222 | 3 | 156392417 | GeneBody/5'UTR/1st exon   | TIPARP   | -6.383±0.505 | -6.76±0.596  | 1.13E-03 |
| cg15680574 | 3 | 156878672 | TSS200                    | CCNL1    | -3.969±0.33  | -4.308±0.361 | 1.53E-05 |
| cg15565872 | 3 | 157155202 | GeneBody/1st intron       | PTX3     | -3.989±0.325 | -4.34±0.396  | 1.05E-05 |
| cg17191178 | 3 | 157824217 | TSS1500                   | SHOX2    | -3.731±0.433 | -3.316±0.548 | 6.99E-05 |
| cg10457895 | 3 | 157828290 | GeneBody/5'UTR/1st intron | RSRC1    | -4.985±0.474 | -5.307±0.459 | 1.86E-03 |
| cg09459188 | 3 | 158520176 | GeneBody/1st intron       | MFSD1    | -5.742±0.663 | -6.19±0.68   | 2.21E-03 |
| cg01308501 | 3 | 159706823 | GeneBody/5'UTR/1st exon   | IL12A    | -5.863±0.526 | -6.283±0.471 | 3.10E-04 |
| cg24494008 | 3 | 160116838 | GeneBody/5'UTR/1st intron | IFT80    | -3.517±0.521 | -3.893±0.616 | 1.58E-03 |
| cg22668533 | 3 | 160117570 | GeneBody/5'UTR/1st intron | SMC4     | -5.042±0.272 | -5.233±0.262 | 1.36E-03 |
| cg16978263 | 3 | 160118452 | GeneBody/5'UTR/1st exon   | SMC4     | -4.072±0.31  | -4.417±0.377 | 6.49E-06 |
| cg21508214 | 3 | 160118610 | GeneBody/5'UTR/1st exon   | SMC4     | -5.903±0.611 | -6.362±0.565 | 6.24E-04 |
| cg23704082 | 3 | 160167518 | GeneBody/5'UTR/1st exon   | TRIM59   | -5.089±0.492 | -5.376±0.416 | 5.80E-03 |
| cg12716838 | 3 | 160823255 | TSS200                    | B3GALNT1 | -4.408±0.337 | -4.724±0.517 | 2.12E-04 |
| cg09171381 | 3 | 160938910 | TSS200                    | NMD3     | -4.435±0.504 | -4.754±0.466 | 3.26E-03 |
| cg06323427 | 3 | 167452563 | GeneBody/5'UTR/1st exon   | PDCD10   | -3.758±0.297 | -3.992±0.355 | 6.70E-04 |
| cg12291552 | 3 | 167813648 | TSS1500                   | GOLIM4   | -5.627±0.422 | -6.064±0.597 | 3.64E-05 |
| cg13243219 | 3 | 169381522 | GeneBody/5'UTR/1st exon   | MECOM    | -4.227±0.569 | -4.616±0.405 | 1.19E-03 |
| cg02973263 | 3 | 169940162 | TSS200                    | PRKCI    | -4.488±0.491 | -4.782±0.47  | 5.51E-03 |
| cg08400120 | 3 | 169940839 | GeneBody/1st intron       | PRKCI    | -4.284±0.235 | -4.585±0.37  | 2.12E-06 |
| cg15348799 | 3 | 170075452 | TSS200                    | SKIL     | -4.666±0.425 | -5.198±0.666 | 3.04E-06 |
| cg03159785 | 3 | 170075773 | GeneBody/5'UTR/1st intron | SKIL     | -5.689±0.55  | -6.052±0.525 | 2.38E-03 |
| cg26209058 | 3 | 170626521 | TSS200                    | EIF5A2   | -5.301±0.473 | -5.617±0.513 | 2.70E-03 |
| cg17142134 | 3 | 170744641 | GeneBody/5'UTR/1st exon   | SLC2A2   | 2.814±0.296  | 2.987±0.32   | 8.11E-03 |
| cg04848046 | 3 | 171830149 | GeneBody/5'UTR/1st intron | FNDC3B   | 2.357±0.208  | 2.496±0.246  | 3.25E-03 |
| cg02976574 | 3 | 171830293 | GeneBody                  | FNDC3B   | 3.649±0.237  | 3.802±0.28   | 4.24E-03 |
| cg11812218 | 3 | 172166920 | TSS1500                   | GHSR     | -2.845±0.412 | -3.16±0.481  | 8.71E-04 |
| cg16555388 | 3 | 172241216 | GeneBody/5'UTR/1st exon   | TNFSF10  | -2.815±0.248 | -2.972±0.301 | 5.66E-03 |
| cg11979312 | 3 | 172242713 | TSS1500                   | TNFSF10  | 1.681±0.193  | 1.864±0.224  | 6.05E-05 |
| cg10527457 | 3 | 172468452 | TSS200                    | ECT2     | -5.696±0.465 | -6.099±0.482 | 1.49E-04 |
| cg17606881 | 3 | 172469009 | GeneBody/5'UTR/1st intron | ECT2     | -4.861±0.611 | -5.284±0.584 | 1.55E-03 |
| cg05722552 | 3 | 173116094 | TSS200                    | NLGN1    | -4.133±0.391 | -4.381±0.474 | 5.47E-03 |
| cg11313124 | 3 | 178789226 | GeneBody/5'UTR/1st intron | ZMAT3    | -4.525±0.344 | -4.843±0.45  | 1.31E-04 |
| cg18380974 | 3 | 178789848 | TSS200                    | ZMAT3    | -2.757±0.177 | -3.003±0.291 | 6.56E-07 |
| cg19522332 | 3 | 178866004 | TSS1500                   | PIK3CA   | -3.285±0.343 | -3.581±0.398 | 2.06E-04 |
| cg22384366 | 3 | 178867004 | GeneBody/5'UTR/1st intron | PIK3CA   | -4.416±0.647 | -4.951±0.592 | 2.04E-04 |
| cg18576883 | 3 | 179041354 | TSS200                    | ZNF639   | -5.6±0.464   | -5.901±0.471 | 3.07E-03 |
| cg20506766 | 3 | 179065432 | TSS200                    | MFN1     | -5.028±0.457 | -5.402±0.508 | 3.65E-04 |
| cg11628282 | 3 | 179065624 | GeneBody/5'UTR/1st intron | MFN1     | -4.521±0.386 | -4.817±0.587 | 1.94E-03 |
| cg09997760 | 3 | 179169556 | TSS200                    | GNB4     | -5.001±0.467 | -5.466±0.507 | 2.54E-05 |
| cg25198545 | 3 | 179280646 | TSS200                    | ACTL6A   | -4.398±0.489 | -4.679±0.404 | 6.37E-03 |
| cg12979743 | 3 | 179322479 | TSS200                    | MRPL47   | -4.345±0.313 | -4.547±0.24  | 2.18E-03 |
| cg18652121 | 3 | 179322868 | GeneBody/1st intron       | NDUFB5   | -4.453±0.407 | -4.765±0.549 | 1.26E-03 |
| cg04359302 | 3 | 179323859 | GeneBody/1st intron       | NDUFB5   | 1.948±0.344  | 2.214±0.282  | 3.90E-04 |
| cg02430692 | 3 | 179754239 | GeneBody/1st intron       | PEX5L    | -3.908±0.389 | -4.141±0.463 | 7.99E-03 |
| cg00818693 | 3 | 180319964 | GeneBody/5'UTR/1st exon   | TTC14    | -4.611±0.201 | -4.769±0.246 | 7.15E-04 |
| cg17302852 | 3 | 180630157 | TSS200                    | FXR1     | -4.411±0.522 | -4.741±0.411 | 2.71E-03 |
| cg27437944 | 3 | 180630533 | GeneBody/1st intron       | FXR1     | -4.839±0.453 | -5.396±0.669 | 2.89E-06 |
| cg01340005 | 3 | 181429460 | TSS1500                   | SOX2     | -4.151±0.296 | -4.407±0.483 | 7.45E-04 |
| cg02528468 | 3 | 182510901 | TSS1500                   | ATP11B   | -4.678±0.29  | -4.865±0.237 | 2.43E-03 |
| cg13913917 | 3 | 182511332 | GeneBody/5'UTR/1st exon   | ATP11B   | -4.935±0.428 | -5.277±0.571 | 8.09E-04 |
| cg08674093 | 3 | 182697846 | GeneBody/1st intron       | DCUN1D1  | -4.09±0.482  | -4.412±0.428 | 1.89E-03 |
| cg02238826 | 3 | 182971069 | GeneBody/5'UTR/1st exon   | B3GNT5   | -5.231±0.533 | -5.682±0.521 | 1.73E-04 |
| cg25416014 | 3 | 183146809 | TSS1500                   | MCF2L2   | -3.745±0.316 | -4.103±0.428 | 7.22E-06 |
| cg11237115 | 3 | 183353422 | GeneBody/5'UTR/1st exon   | KLHL24   | -4.671±0.302 | -4.916±0.414 | 7.71E-04 |
| cg12727374 | 3 | 183542914 | GeneBody/1st intron       | MAP6D1   | -5.661±0.599 | -6.026±0.522 | 4.26E-03 |
| cg24355091 | 3 | 183603136 | TSS1500                   | PARL     | -2.78±0.325  | -3.018±0.418 | 1.75E-03 |
| cg12783640 | 3 | 183735660 | GeneBody/5'UTR/1st exon   | ABCC5    | -5.065±0.444 | -5.581±0.654 | 7.42E-06 |
| cg18236734 | 3 | 183817931 | TSS200                    | HTR3E    | -0.472±0.215 | -0.605±0.247 | 6.00E-03 |
| cg24408199 | 3 | 183852724 | TSS200                    | EIF2B5   | -4.856±0.326 | -5.085±0.372 | 1.93E-03 |
| cg18313702 | 3 | 183853126 | GeneBody/5'UTR/1st exon   | EIF2B5   | -4.668±0.335 | -5.061±0.47  | 4.96E-06 |
| cg23679085 | 3 | 183892773 | GeneBody/5'UTR/1st intron | AP2M1    | -4.81±0.312  | -5.244±0.475 | 4.07E-07 |
| cg13461600 | 3 | 183903550 | TSS1500                   | ABCF3    | -4.289±0.392 | -4.552±0.321 | 1.68E-03 |
| cg20092677 | 3 | 183904085 | GeneBody/1st intron       | ABCF3    | -5.242±0.473 | -5.607±0.674 | 1.45E-03 |
| cg01494864 | 3 | 183967233 | GeneBody/5'UTR/1st exon   | ALG3     | -4.48±0.426  | -4.802±0.46  | 8.07E-04 |
| cg08574156 | 3 | 183979091 | GeneBody/5'UTR/1st exon   | CAMK2N2  | -4.964±0.561 | -5.461±0.664 | 1.56E-04 |
| cg05655556 | 3 | 184016629 | TSS1500                   | PSMD2    | -4.672±0.389 | -4.94±0.482  | 2.70E-03 |
| cg25615963 | 3 | 184032106 | TSS200                    | EIF4G1   | -4.366±0.476 | -4.727±0.427 | 5.40E-04 |
| cg04531710 | 3 | 184032412 | GeneBody/5'UTR/1st exon   | EIF4G1   | -5.572±0.451 | -6.203±0.676 | 3.08E-07 |
| cg27485235 | 3 | 184080068 | GeneBody/5'UTR/1st intron | POLR2H   | -4.816±0.626 | -5.192±0.67  | 6.53E-03 |
| cg00971396 | 3 | 184081400 | GeneBody/1st intron       | POLR2H   | -4.611±0.406 | -4.877±0.355 | 2.20E-03 |
| cg09736922 | 3 | 184095976 | TSS200                    | THPO     | 1.592±0.181  | 1.734±0.268  | 1.42E-03 |
| cg22833027 | 3 | 184098790 | GeneBody                  | CHRD     | -3.882±0.305 | -4.121±0.491 | 1.93E-03 |
| cg09938768 | 3 | 184279093 | TSS1500                   | EPHB3    | -4.514±0.392 | -4.789±0.574 | 3.81E-03 |
| cg12438034 | 3 | 184430477 | TSS1500                   | MAGEF1   | -2.304±0.274 | -2.469±0.287 | 5.88E-03 |
| cg24450631 | 3 | 185542709 | GeneBody/1st exon         | IGF2BP2  | -1.82±0.213  | -2.042±0.323 | 4.57E-05 |
| cg18234011 | 3 | 185543549 | TSS1500                   | IGF2BP2  | -5.01±0.501  | -5.355±0.468 | 1.56E-03 |
| cg08195505 | 3 | 185826362 | GeneBody/5'UTR/1st intron | ETV5     | -4.197±0.351 | -4.426±0.412 | 3.97E-03 |
| cg13031679 | 3 | 186285398 | TSS1500                   | TBCCD1   | -4.527±0.414 | -4.754±0.276 | 7.31E-03 |
| cg19957727 | 3 | 186288330 | GeneBody/5'UTR/1st exon   | TBCCD1   | -5.257±0.414 | -5.781±0.537 | 9.46E-07 |
| cg07361385 | 3 | 186331026 | GeneBody/1st exon         | AHSG     | 2.142±0.196  | 2.256±0.184  | 6.76E-03 |
| cg02200132 | 3 | 186501254 | TSS200                    | EIF4A2   | -4.581±0.469 | -4.917±0.651 | 2.69E-03 |
| cg20872461 | 3 | 186524196 | GeneBody/5'UTR/1st exon   | RFC4     | -5.497±0.371 | -5.731±0.502 | 7.50E-03 |
| cg11504646 | 3 | 186913950 | TSS1500                   | RTP1     | 1.665±0.239  | 1.504±0.336  | 4.86E-03 |
| cg01057962 | 3 | 187463312 | GeneBody/5'UTR/1st exon   | BCL6     | -4.689±0.416 | -5.116±0.555 | 3.25E-05 |
| cg18776764 | 3 | 187463562 | TSS200                    | BCL6     | -5.203±0.565 | -5.915±0.603 | 6.12E-07 |
| cg14859074 | 3 | 190040235 | GeneBody/5'UTR/1st exon   | CLDN1    | -5.243±0.55  | -5.728±0.503 | 9.18E-05 |
| cg01120898 | 3 | 190231382 | TSS1500                   | IL1RAP   | -5.283±0.36  | -5.605±0.346 | 8.05E-05 |
| cg10906552 | 3 | 190232089 | GeneBody/5'UTR/1st intron | IL1RAP   | -4.927±0.34  | -5.353±0.448 | 1.23E-06 |
| cg03192737 | 3 | 190931199 | GeneBody/1st intron       | OSTN     | 0.035±0.352  | -0.449±0.537 | 5.23E-07 |
| cg00253200 | 3 | 192636074 | TSS200                    | MB21D2   | -4.812±0.39  | -5.106±0.429 | 8.57E-04 |
| cg13713381 | 3 | 194354433 | TSS1500                   | TMEM44   | -5.729±0.436 | -6.004±0.423 | 3.73E-03 |
| cg14163776 | 3 | 195164580 | TSS1500                   | ACAP2    | -1.936±0.227 | -2.089±0.29  | 3.66E-03 |
| cg16185365 | 3 | 196230308 | GeneBody/5'UTR/1st exon   | RNF168   | -4.898±0.451 | -5.435±0.559 | 2.38E-06 |

|            |   |           |                           |                  |              |              |          |
|------------|---|-----------|---------------------------|------------------|--------------|--------------|----------|
| cg00293409 | 3 | 196366669 | GeneBody/5'UTR/1st exon   | <i>NRROS</i>     | -3.903±0.407 | -4.215±0.39  | 5.56E-04 |
| cg21840599 | 3 | 196467454 | GeneBody/5'UTR/1st intron | <i>PAK2</i>      | -4.448±0.32  | -4.653±0.274 | 2.75E-03 |
| cg18022496 | 3 | 196594351 | TSS1500                   | <i>SENP5</i>     | -2.759±0.245 | -2.9±0.23    | 7.24E-03 |
| cg20744464 | 3 | 196756875 | TSS200                    | <i>MF12</i>      | -4.313±0.522 | -4.798±0.756 | 1.78E-04 |
| cg12149391 | 3 | 197025853 | TSS1500                   | <i>DLG1</i>      | -4.659±0.462 | -4.988±0.513 | 1.57E-03 |
| cg26336277 | 3 | 197476294 | TSS200                    | <i>FYTTD1</i>    | -3.883±0.635 | -4.508±0.653 | 2.60E-05 |
| cg03438904 | 3 | 197518158 | GeneBody/1st exon         | <i>LRCH3</i>     | -5.157±0.503 | -5.46±0.512  | 5.80E-03 |
| cg16927136 | 3 | 197676755 | GeneBody/5'UTR/1st exon   | <i>IQCG</i>      | -4.709±0.459 | -5.134±0.588 | 1.17E-04 |
| cg21032583 | 3 | 197685803 | GeneBody/5'UTR            | <i>IQCG</i>      | 2.5±0.305    | 2.688±0.323  | 4.95E-03 |
| cg02141570 | 3 | 197808633 | TSS1500                   | <i>ANKRD18DP</i> | -0.269±0.15  | -0.117±0.176 | 2.59E-05 |
| cg07934026 | 4 | 467794    | GeneBody/1st exon         | <i>ABCA11P</i>   | -4.939±0.417 | -5.22±0.524  | 3.56E-03 |
| cg12194493 | 4 | 493061    | GeneBody/5'UTR/1st exon   | <i>PIGG</i>      | -5.873±0.51  | -6.347±0.563 | 6.97E-05 |
| cg16625216 | 4 | 926338    | GeneBody/5'UTR/1st intron | <i>TMEM175</i>   | -5.379±0.528 | -5.801±0.502 | 3.32E-04 |
| cg04912050 | 4 | 980613    | TSS200                    | <i>IDUA</i>      | -4.543±0.353 | -4.919±0.529 | 3.29E-05 |
| cg06393290 | 4 | 1004778   | TSS1500                   | <i>FGFRL1</i>    | -4.907±0.458 | -5.289±0.47  | 2.35E-04 |
| cg00940891 | 4 | 1006016   | TSS1500                   | <i>FGFRL1</i>    | -5.613±0.597 | -6.105±0.636 | 2.98E-04 |
| cg05518543 | 4 | 1283165   | TSS1500                   | <i>MAEA</i>      | -4.203±0.483 | -4.524±0.508 | 2.70E-03 |
| cg05122605 | 4 | 1283721   | GeneBody/1st exon         | <i>MAEA</i>      | -4.546±0.332 | -4.744±0.356 | 6.77E-03 |
| cg13387232 | 4 | 1387823   | GeneBody/5'UTR/1st exon   | <i>CRIPAK</i>    | 2.865±0.179  | 3.076±0.34   | 3.13E-05 |
| cg13225039 | 4 | 1722160   | GeneBody/1st intron       | <i>TMEM129</i>   | -3.144±0.284 | -3.354±0.313 | 1.06E-03 |
| cg16538604 | 4 | 2010703   | GeneBody/1st exon         | <i>NELFA</i>     | -5.799±0.607 | -6.35±0.625  | 7.97E-05 |
| cg00072216 | 4 | 2263638   | GeneBody/1st intron       | <i>MXD4</i>      | -5.277±0.666 | -5.829±0.575 | 1.77E-04 |
| cg16474684 | 4 | 2470049   | TSS1500                   | <i>RNF4</i>      | -3.353±0.355 | -3.589±0.412 | 3.23E-03 |
| cg22362636 | 4 | 2758447   | TSS1500                   | <i>TNIP2</i>     | -3.232±0.198 | -3.479±0.341 | 5.86E-06 |
| cg02496295 | 4 | 2846155   | GeneBody/5'UTR/1st intron | <i>ADD1</i>      | -5.478±0.499 | -5.985±0.691 | 4.42E-05 |
| cg10158181 | 4 | 2965841   | GeneBody/1st exon         | <i>GRK4</i>      | -5.774±0.515 | -6.26±0.496  | 4.09E-05 |
| cg14694952 | 4 | 3076907   | GeneBody/1st intron       | <i>HTT</i>       | -4.968±0.34  | -5.325±0.557 | 6.59E-05 |
| cg19096034 | 4 | 3533527   | GeneBody/1st intron       | <i>LRPAP1</i>    | -4.097±0.308 | -4.356±0.442 | 6.00E-04 |
| cg00654816 | 4 | 4291411   | GeneBody/5'UTR/1st intron | <i>LYAR</i>      | -4.784±0.342 | -4.97±0.259  | 8.72E-03 |
| cg02142461 | 4 | 4293079   | GeneBody/5'UTR/1st intron | <i>ZBTB49</i>    | 0.691±0.263  | 1.025±0.308  | 6.57E-07 |
| cg14530801 | 4 | 4544016   | GeneBody/1st exon         | <i>STX18-AS1</i> | -5.026±0.513 | -5.4±0.562   | 1.22E-03 |
| cg11930592 | 4 | 4861820   | GeneBody/1st exon         | <i>MSX1</i>      | -5.225±0.582 | -5.668±0.652 | 8.24E-04 |
| cg03199651 | 4 | 4862770   | GeneBody/1st intron       | <i>MSX1</i>      | -3.698±0.326 | -3.902±0.334 | 4.39E-03 |
| cg14167596 | 4 | 4862910   | GeneBody/1st intron       | <i>MSX1</i>      | -3.38±0.383  | -3.622±0.424 | 4.59E-03 |
| cg27038439 | 4 | 4864320   | GeneBody/1st intron       | <i>MSX1</i>      | 2.033±0.254  | 2.191±0.308  | 6.15E-03 |
| cg09748975 | 4 | 4864532   | GeneBody                  | <i>MSX1</i>      | 1.459±0.287  | 1.647±0.348  | 4.18E-03 |
| cg11237738 | 4 | 5527295   | GeneBody/1st intron       | <i>C4orf6</i>    | 1.362±0.306  | 1.132±0.463  | 2.30E-03 |
| cg21210758 | 4 | 5713005   | GeneBody/5'UTR/1st exon   | <i>EVC</i>       | -3.048±0.445 | -2.572±0.422 | 6.27E-06 |
| cg01519742 | 4 | 6202091   | GeneBody/5'UTR/1st exon   | <i>JAKMIP1</i>   | -4.548±0.338 | -4.802±0.462 | 1.63E-03 |
| cg25554036 | 4 | 6271136   | TSS1500                   | <i>WFS1</i>      | -2.028±0.341 | -2.218±0.319 | 9.41E-03 |
| cg09785172 | 4 | 6271658   | GeneBody/5'UTR/1st exon   | <i>WFS1</i>      | -5.08±0.401  | -5.342±0.49  | 4.26E-03 |
| cg01723464 | 4 | 6642120   | GeneBody/5'UTR/1st exon   | <i>MRFAP1</i>    | -5.002±0.316 | -5.245±0.26  | 4.24E-04 |
| cg10663973 | 4 | 6642559   | GeneBody/5'UTR/1st exon   | <i>MRFAP1</i>    | -4.66±0.623  | -5.066±0.572 | 2.53E-03 |
| cg19255853 | 4 | 6675611   | TSS1500                   | <i>LOC93622</i>  | -4.964±0.51  | -5.357±0.506 | 5.48E-04 |
| cg15397506 | 4 | 6675881   | GeneBody/1st exon         | <i>LOC93622</i>  | -5.45±0.509  | -5.958±0.638 | 3.86E-05 |
| cg14489884 | 4 | 6711592   | GeneBody/5'UTR/1st exon   | <i>MRFAP1L1</i>  | -5.197±0.48  | -5.577±0.541 | 5.41E-04 |
| cg10203523 | 4 | 6711606   | GeneBody/5'UTR/1st exon   | <i>MRFAP1L1</i>  | -5.048±0.396 | -5.319±0.361 | 1.59E-03 |
| cg02057157 | 4 | 6717681   | TSS200                    | <i>BLOC1S4</i>   | -2.935±0.714 | -3.47±0.722  | 7.70E-04 |
| cg18424538 | 4 | 6717981   | GeneBody/1st exon         | <i>BLOC1S4</i>   | -5.576±0.538 | -5.894±0.505 | 5.99E-03 |
| cg25194415 | 4 | 6784170   | TSS1500                   | <i>KIAA0232</i>  | -5.058±0.683 | -5.484±0.545 | 3.09E-03 |
| cg19278809 | 4 | 6785080   | GeneBody/5'UTR/1st intron | <i>KIAA0232</i>  | -5.089±0.438 | -5.43±0.554  | 8.92E-04 |
| cg12497851 | 4 | 6910926   | TSS1500                   | <i>TBC1D14</i>   | -3.984±0.241 | -4.2±0.411   | 5.98E-04 |
| cg13564595 | 4 | 7097733   | GeneBody/1st exon         | <i>GRPEL1</i>    | -5.804±0.515 | -6.259±0.532 | 1.17E-04 |
| cg03847636 | 4 | 7070632   | TSS1500                   | <i>GRPEL1</i>    | -3.836±0.443 | -4.09±0.487  | 9.71E-03 |
| cg18619267 | 4 | 7940375   | GeneBody/5'UTR/1st intron | <i>AFAP1</i>     | -4.314±0.376 | -4.552±0.47  | 5.80E-03 |
| cg06862062 | 4 | 8442641   | GeneBody/1st exon         | <i>TRMT44</i>    | -5.364±0.404 | -5.646±0.405 | 1.52E-03 |
| cg05927159 | 4 | 10118984  | TSS1500                   | <i>WDR1</i>      | -4.679±0.347 | -5.022±0.459 | 5.53E-05 |
| cg21774863 | 4 | 13486498  | TSS1500                   | <i>RAB28</i>     | -4.819±0.368 | -5.199±0.48  | 2.73E-05 |
| cg20073553 | 4 | 13545291  | GeneBody/1st intron       | <i>NKX3-2</i>    | -2.667±0.321 | -2.856±0.365 | 8.48E-03 |
| cg11392765 | 4 | 13546673  | TSS1500                   | <i>NKX3-2</i>    | -4.534±0.44  | -4.89±0.459  | 3.47E-04 |
| cg05475028 | 4 | 13629588  | TSS1500                   | <i>BOD1L1</i>    | -4.956±0.405 | -5.207±0.408 | 4.63E-03 |
| cg13455369 | 4 | 13629759  | TSS1500                   | <i>BOD1L1</i>    | -5.167±0.471 | -5.459±0.453 | 4.21E-03 |
| cg09435090 | 4 | 17513980  | TSS200                    | <i>QDPR</i>      | -3.888±0.54  | -4.406±0.545 | 3.60E-05 |
| cg05028306 | 4 | 17578663  | TSS1500                   | <i>LAP3</i>      | -2.65±0.274  | -2.461±0.294 | 1.97E-03 |
| cg23435440 | 4 | 17811362  | GeneBody/5'UTR/1st intron | <i>DCAF16</i>    | -3.193±0.406 | -3.556±0.491 | 1.51E-04 |
| cg14377370 | 4 | 17812264  | GeneBody/5'UTR/1st exon   | <i>DCAF16</i>    | -6.104±0.551 | -6.618±0.614 | 6.74E-05 |
| cg05568762 | 4 | 18023126  | GeneBody/1st intron       | <i>LCORL</i>     | -5.004±0.303 | -5.312±0.435 | 5.25E-05 |
| cg03742003 | 4 | 20255264  | GeneBody/5'UTR/1st exon   | <i>SLIT2</i>     | -2.947±0.245 | -3.143±0.347 | 1.02E-03 |
| cg20203792 | 4 | 20701925  | TSS200                    | <i>PACRGL</i>    | -4.487±0.234 | -4.644±0.249 | 2.57E-03 |
| cg12435758 | 4 | 25032141  | GeneBody/1st exon         | <i>LG12</i>      | -4.826±0.431 | -5.295±0.523 | 9.16E-06 |
| cg16148403 | 4 | 25161816  | GeneBody/1st intron       | <i>SEPSECS</i>   | -5.116±0.691 | -5.556±0.546 | 2.51E-03 |
| cg18815539 | 4 | 25162020  | GeneBody/5'UTR/1st exon   | <i>SEPSECS</i>   | -5.818±0.636 | -6.189±0.577 | 6.32E-03 |
| cg05965402 | 4 | 25235416  | TSS1500                   | <i>PI4K2B</i>    | -3.619±0.297 | -3.838±0.262 | 7.38E-04 |
| cg22845362 | 4 | 25378974  | GeneBody/5'UTR/1st intron | <i>ANAPC4</i>    | -5.807±0.53  | -6.142±0.461 | 3.03E-03 |
| cg25969673 | 4 | 26585760  | GeneBody/5'UTR/1st exon   | <i>TBC1D19</i>   | -4.509±0.331 | -4.785±0.425 | 4.39E-04 |
| cg06251489 | 4 | 26861983  | TSS1500                   | <i>STIM2</i>     | -5.259±0.596 | -5.887±0.667 | 1.15E-05 |
| cg18081881 | 4 | 37828048  | TSS1500                   | <i>PGM2</i>      | -5.809±0.662 | -6.328±0.606 | 3.81E-04 |
| cg00737514 | 4 | 37893313  | GeneBody/5'UTR/1st intron | <i>TBC1D1</i>    | -4.736±0.507 | -5.25±0.46   | 1.26E-05 |
| cg00033516 | 4 | 38666773  | TSS1500                   | <i>FLJ13197</i>  | -3.874±0.291 | -4.074±0.432 | 4.75E-03 |
| cg20530223 | 4 | 39047037  | GeneBody/5'UTR/1st intron | <i>KLHL5</i>     | -4.489±0.548 | -4.832±0.518 | 3.81E-03 |
| cg20166783 | 4 | 39367943  | GeneBody/5'UTR/1st exon   | <i>RFC1</i>      | -5.707±0.432 | -6.04±0.5    | 7.82E-04 |
| cg00762512 | 4 | 39460606  | TSS200                    | <i>LIAS</i>      | -4.326±0.377 | -4.591±0.453 | 2.13E-03 |
| cg05507894 | 4 | 39640920  | TSS1500                   | <i>SMIM14</i>    | -5.25±0.427  | -5.753±0.609 | 4.96E-06 |
| cg08292112 | 4 | 39699959  | GeneBody/1st exon         | <i>UBE2K</i>     | -4.987±0.471 | -5.479±0.559 | 1.55E-05 |
| cg17815841 | 4 | 39979368  | GeneBody/5'UTR/1st exon   | <i>PDS5A</i>     | -5.17±0.31   | -5.406±0.501 | 2.60E-03 |
| cg24438217 | 4 | 39980114  | TSS1500                   | <i>PDS5A</i>     | -1.157±0.233 | -1.358±0.385 | 8.31E-04 |
| cg00804392 | 4 | 40198595  | GeneBody/5'UTR/1st exon   | <i>RHOH</i>      | -0.851±0.21  | -1.004±0.283 | 2.15E-03 |
| cg01704534 | 4 | 40518024  | TSS200                    | <i>RBM47</i>     | -2.289±0.225 | -2.453±0.299 | 2.03E-03 |
| cg24719601 | 4 | 41750466  | GeneBody/1st exon         | <i>PHOX2B</i>    | -3.206±0.217 | -3.462±0.332 | 6.97E-06 |
| cg10652277 | 4 | 41992362  | TSS200                    | <i>SLC30A9</i>   | -4.403±0.538 | -4.811±0.485 | 5.47E-04 |
| cg08321272 | 4 | 41992621  | GeneBody/5'UTR/1st exon   | <i>SLC30A9</i>   | -6.07±0.594  | -6.547±0.537 | 2.85E-04 |
| cg27427207 | 4 | 42658610  | GeneBody/1st intron       | <i>ATP8A1</i>    | -4.819±0.476 | -5.162±0.452 | 1.04E-03 |
| cg01699584 | 4 | 44450999  | TSS200                    | <i>KCTD8</i>     | -5.157±0.441 | -5.714±0.497 | 6.44E-07 |
| cg04683119 | 4 | 44679953  | TSS1500                   | <i>GUF1</i>      | -4.169±0.357 | -4.478±0.411 | 1.94E-04 |
| cg21219744 | 4 | 44680344  | TSS200                    | <i>GUF1</i>      | -4.757±0.387 | -5.109±0.514 | 1.66E-04 |

|            |   |           |                           |              |              |              |          |
|------------|---|-----------|---------------------------|--------------|--------------|--------------|----------|
| cg26303908 | 4 | 44728763  | TSS200                    | GNPDA2       | -4.77±0.665  | -5.314±0.552 | 2.00E-04 |
| cg03469082 | 4 | 46126448  | TSS1500                   | GABRG1       | -3.824±0.342 | -4.043±0.484 | 7.45E-03 |
| cg03593419 | 4 | 46995474  | GeneBody/5'UTR/1st exon   | GABRA4       | -4.068±0.409 | -4.453±0.58  | 1.39E-04 |
| cg23055159 | 4 | 47465899  | TSS1500                   | COMMD8       | -4.722±0.447 | -4.982±0.385 | 6.13E-03 |
| cg18719814 | 4 | 47916640  | GeneBody/5'UTR/1st exon   | NFXL1        | -5.353±0.6   | -5.922±0.697 | 5.91E-05 |
| cg06297145 | 4 | 47917042  | TSS1500                   | NFXL1        | -3.892±0.364 | -4.123±0.411 | 4.61E-03 |
| cg23266266 | 4 | 52708709  | TSS1500                   | DCUN1D4      | -4.886±0.346 | -5.095±0.369 | 6.17E-03 |
| cg21750545 | 4 | 52709356  | GeneBody/5'UTR/1st exon   | DCUN1D4      | -5.534±0.613 | -6.119±0.537 | 3.00E-05 |
| cg22333016 | 4 | 54244258  | GeneBody/1st intron       | FIP1L1       | -4.647±0.442 | -4.909±0.497 | 8.05E-03 |
| cg22722822 | 4 | 54931066  | TSS1500                   | CHIC2        | -4.77±0.671  | -5.233±0.603 | 1.44E-03 |
| cg13002939 | 4 | 55094499  | TSS1500                   | PDGFRA       | -4.61±0.296  | -4.892±0.439 | 1.45E-04 |
| cg27154163 | 4 | 55523756  | TSS1500                   | KIT          | -4.03±0.318  | -4.248±0.434 | 3.75E-03 |
| cg07181349 | 4 | 55524569  | GeneBody/1st intron       | KIT          | -4.99±0.566  | -5.395±0.688 | 1.87E-03 |
| cg17286640 | 4 | 55991202  | GeneBody/1st intron       | KDR          | -4.546±0.382 | -4.817±0.424 | 1.64E-03 |
| cg14838256 | 4 | 56212685  | GeneBody/1st intron       | SRD5A3       | -5.578±0.596 | -6.095±0.504 | 9.66E-05 |
| cg10313093 | 4 | 56261753  | TSS1500                   | TMEM165      | -4.933±0.287 | -5.236±0.416 | 3.06E-05 |
| cg00886554 | 4 | 56502598  | TSS200                    | NMU          | -4.595±0.401 | -4.841±0.378 | 4.54E-03 |
| cg12914062 | 4 | 56720202  | GeneBody/5'UTR/1st intron | EXOC1        | -4.676±0.476 | -4.99±0.571  | 3.78E-03 |
| cg02426410 | 4 | 57253603  | GeneBody/5'UTR/1st exon   | AASDH        | -5.408±0.548 | -5.893±0.516 | 9.28E-05 |
| cg03289369 | 4 | 57253815  | TSS200                    | AASDH        | -5.594±0.631 | -6.104±0.61  | 3.02E-04 |
| cg04418752 | 4 | 57301960  | GeneBody/5'UTR/1st exon   | PAICS        | -4.263±0.314 | -4.624±0.378 | 3.67E-06 |
| cg13086586 | 4 | 57303149  | GeneBody/1st intron       | PAICS        | -1.195±0.376 | -0.933±0.579 | 4.72E-03 |
| cg03129910 | 4 | 57333643  | TSS200                    | SRP72        | -4.327±0.38  | -4.581±0.438 | 3.04E-03 |
| cg24719575 | 4 | 57773768  | TSS1500                   | REST         | -4.016±0.493 | -4.333±0.468 | 3.01E-03 |
| cg05503412 | 4 | 57843540  | GeneBody/1st exon         | NOA1         | -5.239±0.468 | -5.548±0.565 | 3.85E-03 |
| cg03876618 | 4 | 57976034  | GeneBody/1st exon         | LOC255130    | -2.76±0.325  | -3±0.507     | 3.01E-03 |
| cg00884221 | 4 | 57976915  | TSS1500                   | IGFBP7       | -3.913±0.438 | -4.171±0.507 | 8.69E-03 |
| cg13701273 | 4 | 66535780  | GeneBody/1st exon         | LOC100144602 | -3.18±0.465  | -3.473±0.54  | 5.29E-03 |
| cg19445598 | 4 | 68566438  | GeneBody/1st intron       | UBA6         | -5.271±0.47  | -5.644±0.578 | 6.84E-04 |
| cg08928646 | 4 | 68567174  | GeneBody/1st exon         | LOC550112    | -4.018±0.443 | -4.449±0.535 | 4.85E-05 |
| cg05480532 | 4 | 68830216  | TSS1500                   | TMPPRSS11A   | 1.432±0.134  | 1.573±0.232  | 9.23E-05 |
| cg01804429 | 4 | 69216077  | TSS1500                   | YTHDC1       | -0.899±0.211 | -0.779±0.232 | 9.81E-03 |
| cg04276232 | 4 | 70362022  | TSS1500                   | UGT2B4       | 1.851±0.193  | 1.705±0.301  | 2.36E-03 |
| cg10648113 | 4 | 70627751  | TSS1500                   | SULT1B1      | 3.241±0.322  | 3.442±0.388  | 6.15E-03 |
| cg17849194 | 4 | 71553882  | TSS1500                   | UTP3         | -5.405±0.569 | -6.029±0.515 | 3.92E-06 |
| cg24329794 | 4 | 71704884  | GeneBody/5'UTR/1st intron | GRSF1        | -4.655±0.479 | -4.979±0.501 | 2.23E-03 |
| cg07376029 | 4 | 72650992  | TSS1500                   | GC           | -0.023±0.207 | -0.151±0.233 | 5.67E-03 |
| cg13643796 | 4 | 73434209  | GeneBody/1st intron       | ADAMTS3      | -4.5±0.332   | -4.79±0.456  | 3.10E-04 |
| cg20368979 | 4 | 73935086  | GeneBody/1st exon         | COX18        | -3.875±0.159 | -4.026±0.364 | 1.78E-03 |
| cg26125600 | 4 | 74718978  | TSS200                    | PF4V1        | -0.354±0.254 | -0.501±0.28  | 8.84E-03 |
| cg16249454 | 4 | 74965075  | TSS200                    | CXCL2        | -4.761±0.477 | -5.048±0.604 | 8.88E-03 |
| cg04941721 | 4 | 75230901  | GeneBody/5'UTR/1st exon   | EREG         | -3.769±0.278 | -4.107±0.421 | 3.94E-06 |
| cg25467043 | 4 | 76440093  | GeneBody/5'UTR/1st intron | THAP6        | -4.313±0.312 | -4.664±0.457 | 1.20E-05 |
| cg14988503 | 4 | 76555547  | GeneBody/5'UTR/1st exon   | CDKL2        | -4.529±0.287 | -4.816±0.394 | 5.42E-05 |
| cg01331554 | 4 | 76598477  | TSS200                    | G3BP2        | -6.025±0.59  | -6.357±0.527 | 7.96E-03 |
| cg11489580 | 4 | 76598793  | TSS200                    | G3BP2        | -4.01±0.255  | -4.2±0.388   | 2.54E-03 |
| cg03201604 | 4 | 76861293  | GeneBody                  | NAAA         | -4.546±0.364 | -4.971±0.433 | 2.82E-06 |
| cg10682057 | 4 | 76862278  | TSS200                    | NAAA         | -5.818±0.556 | -6.241±0.564 | 6.58E-04 |
| cg11356705 | 4 | 77069568  | GeneBody/1st exon         | NUP54        | -5.556±0.607 | -6.048±0.491 | 2.14E-04 |
| cg11659747 | 4 | 77134585  | GeneBody/1st exon         | SCARB2       | -2.596±0.147 | -2.745±0.265 | 1.97E-04 |
| cg21656748 | 4 | 77135347  | GeneBody/5'UTR/1st exon   | FAM47E       | -5.572±0.511 | -6.184±0.602 | 1.78E-06 |
| cg22606062 | 4 | 77996244  | GeneBody/5'UTR/1st intron | CCNI         | -4.948±0.339 | -5.513±0.555 | 1.47E-08 |
| cg21548788 | 4 | 77997565  | TSS1500                   | CCNI         | -5.036±0.333 | -5.388±0.524 | 4.51E-05 |
| cg05409601 | 4 | 78077912  | TSS1500                   | CCNG2        | -4.271±0.569 | -4.813±0.514 | 3.18E-05 |
| cg09087966 | 4 | 78079025  | GeneBody/5'UTR/1st intron | CCNG2        | -5.557±0.358 | -5.806±0.45  | 2.66E-03 |
| cg17341358 | 4 | 78784105  | GeneBody/1st intron       | MRPL1        | -5.274±0.393 | -5.574±0.425 | 7.29E-04 |
| cg26112353 | 4 | 79696708  | TSS1500                   | BMP2K        | -3.988±0.438 | -4.256±0.48  | 5.81E-03 |
| cg14197923 | 4 | 81187906  | GeneBody/5'UTR/1st exon   | FGF5         | -4.599±0.346 | -4.999±0.483 | 6.12E-06 |
| cg13843773 | 4 | 81256811  | TSS200                    | C4orf22      | -4.797±0.448 | -5.273±0.513 | 1.10E-05 |
| cg22334000 | 4 | 81256999  | GeneBody/1st exon         | C4orf22      | -3.193±0.237 | -3.02±0.294  | 1.59E-03 |
| cg13873733 | 4 | 83352560  | GeneBody/1st intron       | ENOPH1       | -2.813±0.271 | -3.088±0.31  | 2.13E-05 |
| cg10972353 | 4 | 83719895  | GeneBody/5'UTR/1st exon   | SCD5         | -4.848±0.455 | -5.209±0.568 | 6.84E-04 |
| cg20947775 | 4 | 83720240  | TSS1500                   | SCD5         | -4.195±0.393 | -4.437±0.352 | 4.04E-03 |
| cg27413543 | 4 | 83812148  | GeneBody/1st intron       | SEC31A       | -4.103±0.323 | -4.362±0.34  | 3.98E-04 |
| cg22461615 | 4 | 83821917  | GeneBody/5'UTR/1st exon   | THAP9        | -6.071±0.65  | -6.618±0.571 | 1.51E-04 |
| cg19763279 | 4 | 84256190  | GeneBody/5'UTR/1st intron | HPSE         | -4.198±0.42  | -4.553±0.502 | 2.98E-04 |
| cg22774012 | 4 | 84376821  | GeneBody/1st exon         | HELQ         | -5.074±0.468 | -5.425±0.363 | 4.98E-04 |
| cg26071978 | 4 | 84457011  | TSS200                    | AGPAT9       | -5.57±0.582  | -6.136±0.64  | 3.64E-05 |
| cg10685945 | 4 | 84457822  | GeneBody/1st exon         | AGPAT9       | -4.482±0.461 | -4.768±0.456 | 4.30E-03 |
| cg26359204 | 4 | 85419877  | TSS1500                   | NKX6-1       | -4.65±0.399  | -4.973±0.413 | 3.32E-04 |
| cg17084361 | 4 | 85503668  | TSS1500                   | CDS1         | -4.225±0.406 | -4.502±0.444 | 2.21E-03 |
| cg12647643 | 4 | 87515184  | TSS1500                   | PTPN13       | -4.222±0.443 | -4.523±0.413 | 1.79E-03 |
| cg11277230 | 4 | 87813935  | TSS1500                   | C4orf36      | -2.99±0.296  | -3.182±0.397 | 5.79E-03 |
| cg23092072 | 4 | 87927706  | TSS1500                   | AFF1         | -5.025±0.443 | -5.537±0.43  | 1.93E-06 |
| cg02628930 | 4 | 88141617  | GeneBody/5'UTR/1st exon   | KLHL8        | -5.731±0.523 | -6.261±0.668 | 3.91E-05 |
| cg03296929 | 4 | 88720546  | TSS200                    | IBSP         | -1.671±0.375 | -2.158±0.545 | 1.02E-06 |
| cg24207176 | 4 | 89079587  | GeneBody/5'UTR/1st exon   | ABCG2        | -3.533±0.24  | -3.685±0.334 | 7.54E-03 |
| cg13427055 | 4 | 89378005  | TSS1500                   | HERC5        | -5.018±0.293 | -5.413±0.551 | 2.95E-06 |
| cg01802653 | 4 | 89513149  | TSS1500                   | HERC3        | -4.599±0.686 | -5.016±0.545 | 3.83E-03 |
| cg20972543 | 4 | 89514177  | GeneBody/5'UTR/1st intron | HERC3        | -5.24±0.55   | -5.742±0.556 | 7.12E-05 |
| cg15452573 | 4 | 90758843  | TSS1500                   | SNCA         | -4.557±0.349 | -4.917±0.493 | 3.97E-05 |
| cg01357116 | 4 | 94749496  | TSS1500                   | ATOH1        | -3.41±0.302  | -3.619±0.29  | 1.57E-03 |
| cg26226968 | 4 | 95129010  | GeneBody/5'UTR/1st exon   | SMARCAD1     | -5.045±0.49  | -5.484±0.432 | 7.02E-05 |
| cg00688421 | 4 | 99181920  | TSS1500                   | RAP1GDS1     | -4.1±0.264   | -4.274±0.331 | 4.38E-03 |
| cg22559669 | 4 | 99580121  | TSS1500                   | TSPAN5       | -5.782±0.606 | -6.174±0.603 | 3.08E-03 |
| cg07829809 | 4 | 99957216  | GeneBody                  | METAP1       | 1.621±0.317  | 1.808±0.277  | 5.69E-03 |
| cg00268009 | 4 | 100010211 | GeneBody/1st exon         | LOC100507053 | -5.139±0.333 | -5.416±0.346 | 2.50E-04 |
| cg27563778 | 4 | 100432266 | GeneBody/5'UTR/1st exon   | C4orf17      | 1.19±0.315   | 1.393±0.273  | 2.59E-03 |
| cg20713333 | 4 | 100484892 | TSS200                    | TRMT10A      | -5.288±0.51  | -5.641±0.522 | 1.72E-03 |
| cg16220802 | 4 | 100815812 | TSS200                    | LAMTOR3      | -5.034±0.395 | -5.419±0.565 | 9.32E-05 |
| cg11010122 | 4 | 100868318 | TSS1500                   | DNAJB14      | -4.435±0.4   | -4.701±0.496 | 3.94E-03 |
| cg16267491 | 4 | 100871315 | GeneBody/1st intron       | H2AFZ        | -4.967±0.625 | -5.392±0.516 | 1.47E-03 |
| cg18277508 | 4 | 103266345 | GeneBody/5'UTR/1st exon   | SLC39A8      | -3.842±0.476 | -4.127±0.553 | 7.63E-03 |
| cg04304927 | 4 | 103266554 | GeneBody/5'UTR/1st exon   | SLC39A8      | -5.436±0.419 | -5.816±0.488 | 1.10E-04 |
| cg01137708 | 4 | 103423368 | GeneBody/5'UTR/1st intron | NFKB1        | -5.176±0.518 | -5.494±0.424 | 3.63E-03 |

|            |   |           |                           |                 |              |              |          |
|------------|---|-----------|---------------------------|-----------------|--------------|--------------|----------|
| cg16746737 | 4 | 103790299 | GeneBody/1st exon         | <i>CISD2</i>    | -5.812±0.534 | -6.224±0.517 | 5.08E-04 |
| cg02214188 | 4 | 104020949 | GeneBody/5'UTR/1st exon   | <i>BDH2</i>     | -1.373±0.535 | -0.851±0.58  | 3.39E-05 |
| cg19339841 | 4 | 104119196 | GeneBody/1st intron       | <i>CENPE</i>    | -5.342±0.411 | -5.635±0.323 | 8.52E-04 |
| cg19534879 | 4 | 105412299 | GeneBody                  | <i>CXXC4</i>    | -5.349±0.518 | -5.684±0.453 | 2.55E-03 |
| cg27313662 | 4 | 106395321 | TSS200                    | <i>PPA2</i>     | -5.049±0.427 | -5.351±0.419 | 1.30E-03 |
| cg21686523 | 4 | 106629581 | GeneBody/5'UTR/1st intron | <i>INTS12</i>   | -5.206±0.392 | -5.426±0.366 | 8.56E-03 |
| cg05354432 | 4 | 109089890 | GeneBody/5'UTR/1st exon   | <i>LEF1</i>     | -4.295±0.338 | -4.529±0.573 | 7.03E-03 |
| cg24727182 | 4 | 109684250 | TSS200                    | <i>ETNPPL</i>   | -4.246±0.375 | -4.509±0.459 | 2.28E-03 |
| cg21837443 | 4 | 110481957 | GeneBody/1st intron       | <i>CCDC109B</i> | -4.674±0.474 | -5.149±0.448 | 1.62E-05 |
| cg27274728 | 4 | 110624351 | GeneBody/1st intron       | <i>CASP6</i>    | -5.488±0.591 | -5.955±0.623 | 4.78E-04 |
| cg06100991 | 4 | 111119437 | GeneBody                  | <i>ELOVL6</i>   | -4.818±0.46  | -5.194±0.515 | 3.66E-04 |
| cg04249586 | 4 | 111119946 | TSS200                    | <i>ELOVL6</i>   | -3.903±0.225 | -4.06±0.215  | 1.45E-03 |
| cg10525488 | 4 | 113066439 | TSS200                    | <i>C4orf32</i>  | -1.851±0.186 | -2.031±0.239 | 6.24E-05 |
| cg16978070 | 4 | 113067264 | GeneBody/1st intron       | <i>C4orf32</i>  | -4.68±0.349  | -5.047±0.512 | 3.39E-05 |
| cg17241657 | 4 | 113152573 | TSS1500                   | <i>AP1AR</i>    | -4.881±0.457 | -5.371±0.53  | 9.57E-06 |
| cg03109066 | 4 | 113153267 | GeneBody/1st exon         | <i>AP1AR</i>    | -5.927±0.557 | -6.409±0.675 | 2.28E-04 |
| cg13788062 | 4 | 113558189 | TSS200                    | <i>C4orf21</i>  | -4.096±0.508 | -4.436±0.523 | 2.42E-03 |
| cg20391984 | 4 | 114683822 | TSS1500                   | <i>CAMK2D</i>   | -5.692±0.574 | -6.188±0.534 | 1.21E-04 |
| cg07301822 | 4 | 119757621 | TSS1500                   | <i>SEC24D</i>   | -4.649±0.483 | -5.135±0.524 | 2.11E-05 |
| cg00415978 | 4 | 119809925 | TSS200                    | <i>SYNPO2</i>   | -2.886±0.183 | -3.006±0.306 | 9.77E-03 |
| cg14736911 | 4 | 120057818 | GeneBody                  | <i>MYOZ2</i>    | 0.246±0.326  | 0.022±0.342  | 2.00E-03 |
| cg26073856 | 4 | 120243555 | TSS1500                   | <i>FABP2</i>    | 0.835±0.317  | 0.619±0.367  | 2.64E-03 |
| cg16225753 | 4 | 120988337 | TSS1500                   | <i>MAD2L1</i>   | -5.442±0.353 | -5.677±0.38  | 2.71E-03 |
| cg25095380 | 4 | 121843207 | GeneBody/1st intron       | <i>PRDM5</i>    | -5.126±0.607 | -5.749±0.587 | 1.19E-05 |
| cg24646710 | 4 | 121993167 | GeneBody/5'UTR/1st exon   | <i>NDNF</i>     | -4.42±0.658  | -4.801±0.613 | 6.92E-03 |
| cg03354519 | 4 | 122618501 | TSS1500                   | <i>ANXA5</i>    | -4.085±0.232 | -4.273±0.447 | 3.24E-03 |
| cg25969212 | 4 | 122722590 | GeneBody/1st exon         | <i>EXOSC9</i>   | -4.94±0.565  | -5.329±0.497 | 1.41E-03 |
| cg02832245 | 4 | 122722866 | GeneBody/1st intron       | <i>EXOSC9</i>   | -4.346±0.356 | -4.76±0.423  | 2.96E-06 |
| cg10002561 | 4 | 122744832 | GeneBody/5'UTR/1st exon   | <i>CCNA2</i>    | -5.736±0.574 | -6.198±0.565 | 3.29E-04 |
| cg20573242 | 4 | 122745356 | TSS1500                   | <i>CCNA2</i>    | -5.095±0.563 | -5.598±0.517 | 7.88E-05 |
| cg03990551 | 4 | 122791477 | GeneBody/5'UTR/1st exon   | <i>BBS7</i>     | -5.398±0.419 | -5.708±0.403 | 8.25E-04 |
| cg04556854 | 4 | 123653523 | GeneBody/1st intron       | <i>CETN4P</i>   | -4.07±0.546  | -4.471±0.468 | 7.07E-04 |
| cg08524525 | 4 | 123653978 | GeneBody/5'UTR/1st exon   | <i>BBS12</i>    | -5.786±0.474 | -6.061±0.41  | 6.08E-03 |
| cg19987840 | 4 | 123844099 | GeneBody/5'UTR/1st exon   | <i>NUDT6</i>    | -4.592±0.394 | -4.951±0.454 | 1.04E-04 |
| cg20830531 | 4 | 123844416 | GeneBody/1st exon         | <i>SPATA5</i>   | -5.123±0.327 | -5.367±0.306 | 6.98E-04 |
| cg00882832 | 4 | 124317983 | GeneBody/5'UTR/1st exon   | <i>SPRY1</i>    | -4.252±0.451 | -4.674±0.403 | 3.96E-05 |
| cg04382920 | 4 | 128651526 | TSS200                    | <i>SLC25A31</i> | 5.774±0.349  | 6.085±0.427  | 1.61E-04 |
| cg20088535 | 4 | 128802013 | TSS200                    | <i>PLK4</i>     | -5.817±0.655 | -6.343±0.607 | 3.00E-04 |
| cg21722058 | 4 | 128802226 | TSS200                    | <i>PLK4</i>     | -5.208±0.601 | -5.573±0.574 | 4.97E-03 |
| cg07285838 | 4 | 128886005 | TSS1500                   | <i>C4orf29</i>  | -3.665±0.26  | -3.972±0.399 | 7.22E-06 |
| cg00488718 | 4 | 128887044 | GeneBody/5'UTR/1st intron | <i>MFSD8</i>    | -4.906±0.517 | -5.382±0.626 | 1.05E-04 |
| cg10149329 | 4 | 128887145 | TSS200                    | <i>MFSD8</i>    | -4.115±0.22  | -4.293±0.395 | 2.30E-03 |
| cg10640379 | 4 | 128981918 | TSS1500                   | <i>LARP1B</i>   | -4.639±0.523 | -5.028±0.428 | 5.88E-04 |
| cg00783759 | 4 | 128983441 | GeneBody/5'UTR/1st intron | <i>LARP1B</i>   | -5.396±0.596 | -5.935±0.601 | 7.96E-05 |
| cg17280624 | 4 | 129208725 | GeneBody/1st exon         | <i>PGRMC2</i>   | -5.186±0.608 | -5.674±0.672 | 4.38E-04 |
| cg13469311 | 4 | 129209602 | GeneBody/5'UTR/1st exon   | <i>PGRMC2</i>   | -5.51±0.577  | -5.996±0.531 | 1.64E-04 |
| cg10871523 | 4 | 130014369 | GeneBody/5'UTR/1st exon   | <i>SCLT1</i>    | -5.442±0.719 | -6.244±0.739 | 3.79E-06 |
| cg06690548 | 4 | 139162808 | GeneBody/1st intron       | <i>SLC7A11</i>  | 2.399±0.404  | 2.693±0.435  | 1.22E-03 |
| cg03519303 | 4 | 139936796 | TSS200                    | <i>CCRN4L</i>   | -5.227±0.529 | -5.541±0.506 | 5.94E-03 |
| cg10976673 | 4 | 139937474 | GeneBody/1st intron       | <i>CCRN4L</i>   | -4.321±0.292 | -4.589±0.428 | 2.26E-04 |
| cg05088386 | 4 | 140060774 | TSS200                    | <i>ELF2</i>     | 1.92±0.4     | 2.219±0.367  | 6.53E-04 |
| cg22127491 | 4 | 140217063 | GeneBody/5'UTR            | <i>NDUFC1</i>   | -4.482±0.347 | -4.924±0.612 | 4.97E-06 |
| cg20184165 | 4 | 140222646 | TSS200                    | <i>NAA15</i>    | -6.004±0.469 | -6.344±0.493 | 1.16E-03 |
| cg10377451 | 4 | 140375014 | GeneBody/5'UTR/1st exon   | <i>RAB33B</i>   | -5.871±0.657 | -6.447±0.525 | 8.09E-05 |
| cg25323711 | 4 | 141349096 | TSS1500                   | <i>CLGN</i>     | -4.263±0.485 | -4.731±0.555 | 4.56E-05 |
| cg02157306 | 4 | 141444059 | TSS1500                   | <i>ELMOD2</i>   | -4.368±0.337 | -4.614±0.32  | 8.89E-04 |
| cg13132204 | 4 | 141445677 | GeneBody/5'UTR/1st intron | <i>ELMOD2</i>   | -5.818±0.389 | -6.174±0.47  | 1.12E-04 |
| cg11843691 | 4 | 141678312 | TSS1500                   | <i>TBC1D9</i>   | -4.228±0.46  | -4.54±0.463  | 2.00E-03 |
| cg25546588 | 4 | 142557391 | TSS1500                   | <i>IL15</i>     | -4.172±0.283 | -4.34±0.286  | 6.42E-03 |
| cg01856970 | 4 | 142557562 | TSS200                    | <i>IL15</i>     | -5.235±0.357 | -5.446±0.354 | 6.51E-03 |
| cg20716945 | 4 | 144106096 | GeneBody/5'UTR/1st exon   | <i>USP38</i>    | -5.797±0.564 | -6.234±0.636 | 6.74E-04 |
| cg01171588 | 4 | 144106478 | GeneBody/5'UTR/1st exon   | <i>USP38</i>    | -5.695±0.382 | -6.163±0.528 | 2.26E-06 |
| cg01278696 | 4 | 144434369 | TSS1500                   | <i>SMARCA5</i>  | -4.652±0.456 | -4.941±0.383 | 2.87E-03 |
| cg16091845 | 4 | 144434637 | GeneBody/5'UTR/1st exon   | <i>SMARCA5</i>  | -5.645±0.468 | -6.183±0.641 | 6.09E-06 |
| cg00375964 | 4 | 146019130 | TSS200                    | <i>ABCE1</i>    | -5.016±0.618 | -5.384±0.52  | 4.85E-03 |
| cg05546383 | 4 | 146095813 | GeneBody/1st exon         | <i>OTUD4</i>    | 3.062±0.215  | 3.238±0.204  | 2.54E-04 |
| cg06440646 | 4 | 146403418 | GeneBody/5'UTR/1st intron | <i>SMAD1</i>    | -5.048±0.519 | -5.399±0.542 | 2.22E-03 |
| cg22495162 | 4 | 147096787 | TSS200                    | <i>LSM6</i>     | -4.944±0.658 | -5.641±0.669 | 8.47E-06 |
| cg04529955 | 4 | 147442738 | GeneBody/1st intron       | <i>SLC10A7</i>  | -5.14±0.427  | -5.428±0.402 | 1.95E-03 |
| cg05417615 | 4 | 147443478 | TSS1500                   | <i>SLC10A7</i>  | -5.032±0.4   | -5.361±0.579 | 7.82E-04 |
| cg26484333 | 4 | 148538641 | GeneBody/5'UTR/1st exon   | <i>TMEM184C</i> | -5.162±0.545 | -5.617±0.546 | 2.16E-04 |
| cg15810326 | 4 | 148605127 | GeneBody/1st exon         | <i>PRMT10</i>   | -4.262±0.501 | -4.679±0.52  | 2.51E-04 |
| cg13996731 | 4 | 149363522 | GeneBody/5'UTR/1st exon   | <i>NR3C2</i>    | -4.22±0.354  | -4.562±0.433 | 5.62E-05 |
| cg20850582 | 4 | 151936449 | TSS200                    | <i>LRBA</i>     | -4.264±0.316 | -4.451±0.268 | 5.18E-03 |
| cg13219107 | 4 | 151937234 | TSS1500                   | <i>LRBA</i>     | -4.481±0.211 | -4.622±0.237 | 2.99E-03 |
| cg04876451 | 4 | 152682126 | GeneBody/1st exon         | <i>PET112</i>   | -5.727±0.522 | -6.093±0.466 | 1.21E-03 |
| cg03371306 | 4 | 153456039 | GeneBody/5'UTR/1st intron | <i>FBXW7</i>    | -4.843±0.459 | -5.139±0.431 | 2.90E-03 |
| cg05287690 | 4 | 153456344 | GeneBody/5'UTR/1st exon   | <i>FBXW7</i>    | -2.481±0.158 | -2.674±0.28  | 1.00E-05 |
| cg06649520 | 4 | 153700671 | GeneBody/5'UTR/1st exon   | <i>TIGD4</i>    | -5.975±0.483 | -6.367±0.493 | 3.21E-04 |
| cg13825058 | 4 | 154266213 | GeneBody/1st intron       | <i>MND1</i>     | -5.299±0.315 | -5.786±0.453 | 2.83E-08 |
| cg04700925 | 4 | 154387160 | TSS1500                   | <i>KIAA0922</i> | -5.14±0.292  | -5.322±0.329 | 5.55E-03 |
| cg19037167 | 4 | 154606177 | GeneBody/5'UTR/1st intron | <i>TLR2</i>     | -3.469±0.3   | -3.682±0.44  | 3.40E-03 |
| cg11354906 | 4 | 154710371 | TSS200                    | <i>SFRP2</i>    | -3.204±0.27  | -3.373±0.312 | 5.47E-03 |
| cg23910835 | 4 | 154710900 | TSS1500                   | <i>SFRP2</i>    | -3.832±0.42  | -4.09±0.438  | 5.21E-03 |
| cg07786760 | 4 | 155412677 | GeneBody/5'UTR/1st exon   | <i>DCHS2</i>    | -4.631±0.412 | -4.92±0.433  | 1.63E-03 |
| cg23587449 | 4 | 155663689 | TSS1500                   | <i>LRAT</i>     | -3.013±0.295 | -3.335±0.446 | 2.40E-05 |
| cg14586939 | 4 | 156130206 | GeneBody/5'UTR/1st exon   | <i>NPY2R</i>    | -4.543±0.344 | -4.767±0.523 | 7.99E-03 |
| cg09750385 | 4 | 156588012 | TSS200                    | <i>GUCY1A3</i>  | -4.537±0.406 | -4.821±0.358 | 1.19E-03 |
| cg25841987 | 4 | 159093841 | TSS200                    | <i>FAM198B</i>  | -3.841±0.463 | -4.11±0.411  | 6.42E-03 |
| cg27507704 | 4 | 159593171 | GeneBody/5'UTR/1st exon   | <i>C4orf46</i>  | -6.199±0.588 | -6.869±0.628 | 3.03E-06 |
| cg22161476 | 4 | 163085081 | GeneBody/5'UTR/1st exon   | <i>FSTL5</i>    | -3.969±0.33  | -4.319±0.524 | 4.75E-05 |
| cg18695917 | 4 | 163085342 | TSS200                    | <i>FSTL5</i>    | -4.29±0.281  | -4.576±0.484 | 1.32E-04 |
| cg25624712 | 4 | 164088003 | GeneBody/5'UTR/1st exon   | <i>NAF1</i>     | -5.887±0.685 | -6.417±0.602 | 4.17E-04 |
| cg26745540 | 4 | 164253876 | GeneBody/5'UTR/1st exon   | <i>NPY1R</i>    | -3.067±0.246 | -3.221±0.293 | 5.95E-03 |
| cg13975625 | 4 | 164264796 | TSS1500                   | <i>NPY5R</i>    | -3.256±0.252 | -3.526±0.32  | 1.38E-05 |

|             |   |           |                           |                  |              |              |          |
|-------------|---|-----------|---------------------------|------------------|--------------|--------------|----------|
| cg05745457  | 4 | 164394816 | GeneBody/1st exon         | <i>TKTL2</i>     | 2.505±0.184  | 2.299±0.239  | 7.36E-06 |
| cg16413535  | 4 | 164395149 | TSS200                    | <i>TKTL2</i>     | 2.814±0.223  | 2.994±0.318  | 9.05E-04 |
| cg07259382  | 4 | 164536228 | TSS1500                   | <i>43891</i>     | 2.283±0.262  | 2.44±0.329   | 9.41E-03 |
| cg23679141  | 4 | 165118930 | TSS200                    | <i>ANP32C</i>    | -1.8±0.321   | -2.113±0.408 | 5.62E-05 |
| cg12572545  | 4 | 166248219 | TSS1500                   | <i>MSMO1</i>     | -5.214±0.71  | -5.79±0.667  | 2.41E-04 |
| cg26812418  | 4 | 166299976 | TSS200                    | <i>CPE</i>       | -4.394±0.436 | -4.78±0.548  | 1.92E-04 |
| cg02886284  | 4 | 166300290 | GeneBody/5'UTR/1st exon   | <i>CPE</i>       | -4.904±0.552 | -5.344±0.659 | 5.88E-04 |
| cg08570521  | 4 | 166794471 | GeneBody/5'UTR/1st exon   | <i>TLL1</i>      | -4.1±0.419   | -4.34±0.397  | 7.53E-03 |
| cg26538349  | 4 | 169239850 | GeneBody/5'UTR/1st exon   | <i>DDX60</i>     | -4.805±0.824 | -5.263±0.559 | 6.88E-03 |
| cg19252175  | 4 | 169240076 | TSS200                    | <i>DDX60</i>     | -4.088±0.638 | -4.516±0.517 | 1.61E-03 |
| cg15239703  | 4 | 169931051 | GeneBody/1st intron       | <i>CBR4</i>      | -4.901±0.46  | -5.194±0.457 | 3.52E-03 |
| cg13260633  | 4 | 169931597 | TSS200                    | <i>CBR4</i>      | -5.609±0.508 | -6.124±0.544 | 1.83E-05 |
| cg06292277  | 4 | 170541163 | TSS1500                   | <i>CLCN3</i>     | -4.133±0.402 | -4.373±0.442 | 6.98E-03 |
| cg26171231  | 4 | 170542171 | GeneBody/5'UTR/1st exon   | <i>CLCN3</i>     | -4.341±0.45  | -4.623±0.549 | 6.18E-03 |
| cg04518155  | 4 | 170679294 | TSS1500                   | <i>C4orf27</i>   | -4.621±0.337 | -4.871±0.305 | 6.95E-04 |
| cg21549904  | 4 | 174090558 | GeneBody/1st intron       | <i>GALNT7</i>    | -4.829±0.338 | -5.115±0.546 | 9.04E-04 |
| cg25086702  | 4 | 174255559 | GeneBody/5'UTR/1st exon   | <i>HMGB2</i>     | -5.156±0.365 | -5.427±0.401 | 1.02E-03 |
| cg13515674  | 4 | 174255654 | TSS200                    | <i>HMGB2</i>     | -5.495±0.519 | -5.854±0.508 | 1.60E-03 |
| cg16718094  | 4 | 174291993 | TSS200                    | <i>SAP30</i>     | -5.597±0.666 | -6.094±0.591 | 6.31E-04 |
| cg12648583  | 4 | 175205248 | GeneBody/5'UTR/1st exon   | <i>FBXO8</i>     | -4.529±0.4   | -4.894±0.488 | 1.19E-04 |
| cg14602164  | 4 | 175205422 | TSS200                    | <i>FBXO8</i>     | -3.78±0.413  | -4.107±0.398 | 3.83E-04 |
| cg18164599  | 4 | 175443867 | GeneBody/5'UTR/1st exon   | <i>HPGD</i>      | -3.479±0.181 | -3.64±0.347  | 1.27E-03 |
| cg19968631  | 4 | 175750792 | TSS1500                   | <i>GLRA3</i>     | -4.422±0.298 | -4.601±0.351 | 7.92E-03 |
| cg22821324  | 4 | 176923439 | GeneBody/1st intron       | <i>GPM6A</i>     | -3.928±0.389 | -3.673±0.446 | 3.56E-03 |
| cg19639622  | 4 | 176923800 | GeneBody/5'UTR/1st exon   | <i>GPM6A</i>     | -4.475±0.318 | -4.817±0.444 | 1.98E-05 |
| cg11674404  | 4 | 176987359 | GeneBody/5'UTR/1st intron | <i>WDR17</i>     | -3.964±0.356 | -4.289±0.403 | 9.65E-05 |
| cg09475757  | 4 | 178230851 | TSS200                    | <i>NEIL3</i>     | -3.085±0.24  | -3.314±0.27  | 5.18E-05 |
| cg13743031  | 4 | 178231244 | GeneBody/1st exon         | <i>NEIL3</i>     | -4.294±0.292 | -4.525±0.411 | 1.07E-03 |
| cg05060602  | 4 | 183838922 | TSS1500                   | <i>DCTD</i>      | -4.504±0.338 | -4.865±0.44  | 1.61E-05 |
| cg14892066  | 4 | 183839263 | TSS1500                   | <i>DCTD</i>      | -4.702±0.461 | -5.051±0.428 | 5.79E-04 |
| cg227234085 | 4 | 184020261 | GeneBody/1st exon         | <i>WWC2-AS2</i>  | -5.35±0.778  | -5.876±0.793 | 2.14E-03 |
| cg22428102  | 4 | 184020710 | GeneBody/1st exon         | <i>WWC2</i>      | -4.796±0.475 | -5.17±0.737  | 1.61E-03 |
| cg07973390  | 4 | 184365087 | TSS1500                   | <i>CDKN2AIP</i>  | -4.37±0.355  | -4.591±0.357 | 4.27E-03 |
| cg16802152  | 4 | 184365888 | GeneBody/5'UTR/1st exon   | <i>CDKN2AIP</i>  | -4.661±0.594 | -5.161±0.677 | 2.73E-04 |
| cg10348863  | 4 | 184425226 | GeneBody/1st intron       | <i>LOC389247</i> | -4.997±0.347 | -5.392±0.345 | 2.61E-06 |
| cg07731916  | 4 | 185395553 | GeneBody/5'UTR/1st exon   | <i>IRF2</i>      | -2.591±0.683 | -3.084±0.684 | 1.12E-03 |
| cg25255854  | 4 | 185396298 | TSS1500                   | <i>IRF2</i>      | -5.563±0.507 | -5.983±0.552 | 2.86E-04 |
| cg20811273  | 4 | 185570979 | GeneBody/5'UTR/1st exon   | <i>CCDC111</i>   | -4.356±0.398 | -4.699±0.456 | 2.08E-04 |
| cg06600412  | 4 | 185655239 | GeneBody/5'UTR/1st exon   | <i>MLF1IP</i>    | -6.2±0.7     | -6.636±0.548 | 3.04E-03 |
| cg07122495  | 4 | 185655388 | TSS200                    | <i>MLF1IP</i>    | -5.071±0.382 | -5.392±0.525 | 5.26E-04 |
| cg24697682  | 4 | 186064225 | TSS200                    | <i>SLC25A4</i>   | -5.346±0.459 | -5.698±0.504 | 7.14E-04 |
| cg27583030  | 4 | 186064515 | GeneBody/5'UTR/1st exon   | <i>SLC25A4</i>   | -2.617±0.162 | -2.843±0.308 | 1.73E-06 |
| cg19905754  | 4 | 186317888 | GeneBody/5'UTR/1st exon   | <i>ANKRD37</i>   | -5.738±0.569 | -6.18±0.665  | 7.18E-04 |
| cg02545106  | 4 | 186393269 | TSS1500                   | <i>CCDC110</i>   | -3.89±0.48   | -4.183±0.488 | 5.16E-03 |
| cg12697789  | 4 | 186990425 | GeneBody/5'UTR/1st intron | <i>TLR3</i>      | -3.223±0.246 | -3.487±0.418 | 5.66E-05 |
| cg12570787  | 5 | 219185    | GeneBody/1st intron       | <i>SDHA</i>      | -4.068±0.526 | -4.674±0.613 | 3.20E-06 |
| cg10988561  | 5 | 271254    | TSS1500                   | <i>PDCD6</i>     | -2.587±0.323 | -2.873±0.531 | 6.01E-04 |
| cg07020407  | 5 | 271807    | GeneBody/5'UTR/1st exon   | <i>PDCD6</i>     | -5.316±0.55  | -5.758±0.538 | 3.26E-04 |
| cg07780979  | 5 | 303287    | TSS1500                   | <i>AHRR</i>      | 3.062±0.346  | 3.271±0.375  | 6.22E-03 |
| cg01459955  | 5 | 304328    | GeneBody/5'UTR/1st exon   | <i>AHRR</i>      | 3.684±0.398  | 3.922±0.455  | 7.70E-03 |
| cg26436158  | 5 | 443625    | GeneBody/5'UTR/1st intron | <i>EXOC3</i>     | -4.996±0.353 | -5.204±0.391 | 8.06E-03 |
| cg02822723  | 5 | 893431    | GeneBody/1st intron       | <i>TRIP13</i>    | -5.106±0.475 | -5.408±0.457 | 3.39E-03 |
| cg24886748  | 5 | 1111731   | GeneBody/1st intron       | <i>SLC12A7</i>   | -5.09±0.63   | -5.551±0.623 | 9.42E-04 |
| cg23091824  | 5 | 1112355   | TSS200                    | <i>SLC12A7</i>   | -3.629±0.615 | -4.239±0.609 | 2.16E-05 |
| cg26721993  | 5 | 1344908   | GeneBody/1st exon         | <i>CLPTM1L</i>   | -6.133±0.5   | -6.603±0.599 | 7.51E-05 |
| cg24003306  | 5 | 1799717   | GeneBody/5'UTR/1st intron | <i>MRPL36</i>    | -5.033±0.695 | -5.641±0.615 | 9.47E-05 |
| cg25632001  | 5 | 1799723   | GeneBody/5'UTR/1st intron | <i>MRPL36</i>    | -4.31±0.297  | -4.591±0.453 | 1.80E-04 |
| cg06609475  | 5 | 1801142   | TSS1500                   | <i>NDUFS6</i>    | -4.886±0.435 | -5.144±0.424 | 6.17E-03 |
| cg01541629  | 5 | 6633111   | GeneBody/5'UTR/1st exon   | <i>NSUN2</i>     | -4.93±0.446  | -5.323±0.707 | 5.26E-04 |
| cg09576882  | 5 | 6714987   | GeneBody/5'UTR/1st intron | <i>PAPD7</i>     | -2.928±0.205 | -3.106±0.34  | 7.79E-04 |
| cg23248452  | 5 | 9631117   | TSS1500                   | <i>TAS2R1</i>    | 0.426±0.239  | 0.288±0.246  | 8.01E-03 |
| cg13466487  | 5 | 10309051  | TSS1500                   | <i>CMBL</i>      | 3.04±0.23    | 3.214±0.236  | 7.37E-04 |
| cg20126158  | 5 | 10353332  | TSS1500                   | <i>43896</i>     | -4.516±0.424 | -5.031±0.545 | 1.89E-06 |
| cg08103676  | 5 | 10354563  | GeneBody/1st intron       | <i>43896</i>     | -4.298±0.239 | -4.449±0.216 | 3.07E-03 |
| cg21046940  | 5 | 10760858  | GeneBody/1st intron       | <i>DAP</i>       | -4.989±0.482 | -5.3±0.422   | 2.53E-03 |
| cg07817783  | 5 | 10761669  | TSS1500                   | <i>DAP</i>       | -5.532±0.609 | -6.046±0.557 | 1.61E-04 |
| cg27465566  | 5 | 14142574  | TSS1500                   | <i>TRIO</i>      | -3.873±0.364 | -4.095±0.5   | 9.82E-03 |
| cg24602243  | 5 | 14144425  | GeneBody/1st intron       | <i>TRIO</i>      | -3.474±0.328 | -3.714±0.458 | 2.21E-03 |
| cg16188038  | 5 | 16465766  | GeneBody/1st exon         | <i>ZNF622</i>    | -5.181±0.369 | -5.653±0.585 | 2.23E-06 |
| cg14966252  | 5 | 16466459  | TSS1500                   | <i>ZNF622</i>    | -4.03±0.272  | -4.215±0.252 | 1.73E-03 |
| cg07862358  | 5 | 16935888  | GeneBody/1st intron       | <i>MYO10</i>     | -4.511±0.411 | -4.799±0.554 | 3.03E-03 |
| cg08771731  | 5 | 17216434  | TSS1500                   | <i>BASP1</i>     | -4.15±0.357  | -4.492±0.456 | 7.31E-05 |
| cg23496260  | 5 | 17218089  | GeneBody/5'UTR/1st intron | <i>BASP1</i>     | -3.28±0.262  | -3.119±0.364 | 9.69E-03 |
| cg15175266  | 5 | 22854704  | TSS1500                   | <i>CDH12</i>     | 0.872±0.253  | 1.053±0.342  | 2.52E-03 |
| cg15929201  | 5 | 31531945  | GeneBody/5'UTR/1st intron | <i>DROSHA</i>    | -4.574±0.264 | -4.93±0.44   | 1.20E-06 |
| cg00368022  | 5 | 31532653  | GeneBody/1st intron       | <i>C5orf22</i>   | -4.75±0.457  | -5.034±0.472 | 4.65E-03 |
| cg25735280  | 5 | 31638951  | 0                         | 0                | -5.02±0.356  | -5.299±0.564 | 4.31E-04 |
| cg17751867  | 5 | 32173610  | GeneBody/1st intron       | <i>GOLPH3</i>    | -5.493±0.465 | -6.066±0.564 | 1.18E-06 |
| cg03522216  | 5 | 32174578  | TSS200                    | <i>GOLPH3</i>    | -5.264±0.569 | -5.64±0.556  | 2.42E-03 |
| cg01236137  | 5 | 32585526  | TSS200                    | <i>SUB1</i>      | -3.204±0.436 | -3.555±0.558 | 6.43E-04 |
| cg15288179  | 5 | 32585739  | GeneBody/5'UTR/1st intron | <i>SUB1</i>      | -5.96±0.587  | -6.432±0.728 | 5.83E-04 |
| cg07663789  | 5 | 32711429  | TSS200                    | <i>NPR3</i>      | -4.726±0.512 | -5.042±0.546 | 5.12E-03 |
| cg14873135  | 5 | 33440653  | TSS200                    | <i>TARS</i>      | -4.44±0.369  | -4.72±0.341  | 5.81E-04 |
| cg12238343  | 5 | 33936402  | TSS200                    | <i>RXFP3</i>     | -4.197±0.314 | -4.442±0.485 | 1.72E-03 |
| cg14189614  | 5 | 33984660  | GeneBody/1st exon         | <i>SLC45A2</i>   | 2.044±0.1    | 2.107±0.127  | 6.25E-03 |
| cg01091448  | 5 | 34008127  | GeneBody/5'UTR/1st exon   | <i>AMACR</i>     | -5.326±0.497 | -5.743±0.55  | 2.66E-04 |
| cg12346515  | 5 | 34008431  | TSS1500                   | <i>AMACR</i>     | -4.19±0.287  | -4.529±0.371 | 3.06E-06 |
| cg06466479  | 5 | 34919428  | GeneBody                  | <i>BRIX1</i>     | 2.72±0.172   | 2.855±0.186  | 5.52E-04 |
| cg09745307  | 5 | 35048945  | TSS1500                   | <i>AGXT2</i>     | 0.652±0.215  | 0.486±0.332  | 1.98E-03 |
| cg13880228  | 5 | 35230343  | GeneBody/5'UTR/1st intron | <i>PRLR</i>      | -4.027±0.307 | -4.209±0.377 | 9.45E-03 |
| cg05512756  | 5 | 35991735  | TSS200                    | <i>UGT3A1</i>    | -1.715±0.218 | -1.933±0.296 | 5.10E-05 |
| cg19135982  | 5 | 36151277  | GeneBody/5'UTR/1st intron | <i>LMBRD2</i>    | -4.153±0.464 | -4.441±0.502 | 5.18E-03 |
| cg26929490  | 5 | 36877626  | GeneBody/5'UTR/1st intron | <i>NIPBL</i>     | -5.84±0.598  | -6.336±0.517 | 1.78E-04 |
| cg07715201  | 5 | 37840839  | GeneBody/1st intron       | <i>GDNF-AS1</i>  | -3.386±0.253 | -3.638±0.406 | 1.17E-04 |
| cg26475085  | 5 | 38845600  | TSS1500                   | <i>OSMR</i>      | -4.649±0.451 | -4.953±0.603 | 4.12E-03 |

|            |   |          |                           |                     |              |              |          |
|------------|---|----------|---------------------------|---------------------|--------------|--------------|----------|
| cg15873715 | 5 | 39425138 | GeneBody/5'UTR/1st exon   | <i>DAB2</i>         | -4.115±0.359 | -4.597±0.531 | 6.31E-07 |
| cg23164327 | 5 | 40755670 | GeneBody/5'UTR/1st intron | <i>TTC33</i>        | -4.766±0.553 | -5.084±0.521 | 7.31E-03 |
| cg24382521 | 5 | 40908228 | TSS1500                   | <i>C7</i>           | 1.42±0.322   | 1.614±0.326  | 5.74E-03 |
| cg10850119 | 5 | 41925229 | TSS200                    | <i>FBXO4</i>        | -5.097±0.289 | -5.273±0.352 | 7.57E-03 |
| cg22359217 | 5 | 41925772 | GeneBody/1st intron       | <i>FBXO4</i>        | -4.7±0.37    | -5.042±0.444 | 9.62E-05 |
| cg03050748 | 5 | 42423555 | TSS1500                   | <i>GHR</i>          | -4.039±0.42  | -4.294±0.511 | 7.75E-03 |
| cg04741133 | 5 | 43042726 | GeneBody/1st exon         | <i>LOC153684</i>    | -4.284±0.276 | -4.498±0.403 | 1.54E-03 |
| cg24150528 | 5 | 43125550 | GeneBody                  | <i>ZNF131</i>       | 2.604±0.171  | 2.731±0.287  | 3.61E-03 |
| cg24371225 | 5 | 43192392 | GeneBody/5'UTR/1st exon   | <i>NIM1</i>         | -5.71±0.46   | -6.005±0.507 | 4.13E-03 |
| cg26088104 | 5 | 43515152 | GeneBody/5'UTR/1st exon   | <i>C5orf34</i>      | -4.391±0.65  | -4.897±0.593 | 4.21E-04 |
| cg24043192 | 5 | 43515527 | TSS1500                   | <i>C5orf34</i>      | -3.479±0.49  | -3.775±0.452 | 4.97E-03 |
| cg22215520 | 5 | 43557435 | GeneBody/5'UTR/1st intron | <i>PAIP1</i>        | -5.155±0.403 | -5.571±0.54  | 3.03E-05 |
| cg14865516 | 5 | 43557751 | TSS1500                   | <i>PAIP1</i>        | -4.042±0.354 | -4.275±0.429 | 3.97E-03 |
| cg26317056 | 5 | 43602919 | GeneBody/5'UTR/1st exon   | <i>NNT</i>          | -4.934±0.316 | -5.334±0.466 | 1.77E-06 |
| cg14654926 | 5 | 44388688 | GeneBody/1st exon         | <i>FGF10</i>        | -3.021±0.321 | -3.255±0.393 | 1.62E-03 |
| cg26781886 | 5 | 49737336 | TSS200                    | <i>EMB</i>          | -3.583±0.202 | -3.73±0.303  | 3.09E-03 |
| cg15676241 | 5 | 52285231 | GeneBody/1st exon         | <i>ITGA2</i>        | -2.485±0.132 | -2.657±0.285 | 1.79E-05 |
| cg09759260 | 5 | 52285480 | GeneBody/1st intron       | <i>ITGA2</i>        | -3.835±0.286 | -4.065±0.425 | 1.09E-03 |
| cg21540749 | 5 | 52405349 | GeneBody/1st intron       | <i>MOCS2</i>        | -5.033±0.521 | -5.444±0.442 | 3.59E-04 |
| cg19844287 | 5 | 52405864 | GeneBody/1st exon         | <i>LOC257396</i>    | -4.933±0.401 | -5.187±0.492 | 5.75E-03 |
| cg06476337 | 5 | 52856530 | GeneBody/1st exon         | <i>NDUFS4</i>       | -2.697±0.509 | -3.17±0.631  | 1.02E-04 |
| cg26356176 | 5 | 53813380 | TSS1500                   | <i>SNX18</i>        | -4.104±0.265 | -4.259±0.244 | 6.26E-03 |
| cg07707227 | 5 | 54469532 | TSS1500                   | <i>CDC20B</i>       | -4.208±0.342 | -4.485±0.42  | 5.36E-04 |
| cg09230732 | 5 | 54603874 | GeneBody/1st exon         | <i>SKIV2L2</i>      | -4.516±0.506 | -4.903±0.556 | 7.31E-04 |
| cg09277365 | 5 | 55008523 | TSS1500                   | <i>SLC38A9</i>      | -3.955±0.414 | -4.232±0.274 | 1.35E-03 |
| cg02899723 | 5 | 55033614 | TSS1500                   | <i>DDX4</i>         | 4.171±0.292  | 4.39±0.373   | 1.38E-03 |
| cg15091410 | 5 | 55149500 | GeneBody/1st intron       | <i>IL31RA</i>       | -0.235±0.355 | -0.522±0.356 | 3.78E-04 |
| cg13576061 | 5 | 55291172 | GeneBody/1st exon         | <i>FLJ31104</i>     | -4.562±0.536 | -5.044±0.543 | 8.78E-05 |
| cg25159610 | 5 | 57756802 | TSS1500                   | <i>PLK2</i>         | -4.709±0.429 | -5.224±0.609 | 3.70E-06 |
| cg18704047 | 5 | 59783668 | TSS200                    | <i>PART1</i>        | -0.507±0.385 | -0.731±0.355 | 6.60E-03 |
| cg03905094 | 5 | 59996421 | TSS1500                   | <i>DEPDC1B</i>      | -4.466±0.285 | -4.746±0.3   | 2.85E-05 |
| cg00581156 | 5 | 61699416 | GeneBody/1st intron       | <i>DIMT1</i>        | -5.499±0.553 | -5.889±0.466 | 1.06E-03 |
| cg11044823 | 5 | 64858848 | GeneBody/5'UTR/1st intron | <i>CENPK</i>        | -4.204±0.263 | -4.402±0.264 | 7.26E-04 |
| cg08307039 | 5 | 64920116 | GeneBody/5'UTR/1st exon   | <i>TRIM23</i>       | -4.496±0.478 | -4.797±0.418 | 3.24E-03 |
| cg25438054 | 5 | 65017496 | GeneBody/5'UTR/1st intron | <i>SGTB</i>         | -4.041±0.355 | -4.342±0.436 | 3.10E-04 |
| cg22009138 | 5 | 65222522 | GeneBody/5'UTR/1st exon   | <i>ERBB2IP</i>      | -3.959±0.518 | -4.365±0.546 | 5.07E-04 |
| cg15021292 | 5 | 67521596 | GeneBody/5'UTR/1st intron | <i>PIK3R1</i>       | 1.623±0.222  | 1.8±0.295    | 8.09E-04 |
| cg03989322 | 5 | 68389537 | TSS1500                   | <i>SLC30A5</i>      | -4.469±0.451 | -4.787±0.503 | 1.75E-03 |
| cg25112044 | 5 | 68530979 | GeneBody/1st intron       | <i>CDK7</i>         | -4.72±0.448  | -5.107±0.622 | 3.83E-04 |
| cg05095674 | 5 | 70363677 | TSS200                    | <i>GTF2H2</i>       | -4.385±0.509 | -4.727±0.501 | 2.11E-03 |
| cg02001410 | 5 | 71403045 | TSS200                    | <i>MAP1B</i>        | -3.446±0.315 | -3.658±0.459 | 5.41E-03 |
| cg16793150 | 5 | 71616026 | GeneBody/1st exon         | <i>MRPS27</i>       | -5.718±0.613 | -6.249±0.512 | 9.88E-05 |
| cg12026956 | 5 | 72112008 | TSS1500                   | <i>TNPO1</i>        | -3.796±0.38  | -4.063±0.422 | 1.76E-03 |
| cg19220754 | 5 | 72112588 | GeneBody/1st intron       | <i>TNPO1</i>        | -5.329±0.516 | -5.939±0.654 | 2.76E-06 |
| cg05731779 | 5 | 72463687 | 0                         | 0                   | 2.638±0.2    | 2.762±0.264  | 7.92E-03 |
| cg01056155 | 5 | 72794294 | GeneBody/5'UTR/1st exon   | <i>BTF3</i>         | -4.988±0.366 | -5.21±0.373  | 5.55E-03 |
| cg10833576 | 5 | 72861749 | GeneBody/5'UTR/1st intron | <i>UTP15</i>        | -5.499±0.485 | -5.832±0.425 | 1.43E-03 |
| cg01439669 | 5 | 73936053 | GeneBody/5'UTR/1st intron | <i>ENC1</i>         | -5.808±0.482 | -6.256±0.527 | 6.70E-05 |
| cg20951821 | 5 | 73937141 | GeneBody/5'UTR/1st exon   | <i>ENC1</i>         | -4.821±0.358 | -5.331±0.505 | 1.43E-07 |
| cg08548086 | 5 | 73980929 | TSS200                    | <i>HEXB</i>         | -5.028±0.541 | -5.591±0.627 | 1.57E-05 |
| cg20482071 | 5 | 73981186 | GeneBody/1st exon         | <i>HEXB</i>         | -6.406±0.672 | -6.869±0.678 | 1.79E-03 |
| cg20277250 | 5 | 74061999 | TSS1500                   | <i>NSA2</i>         | 2.23±0.228   | 2.366±0.258  | 7.74E-03 |
| cg08881067 | 5 | 74062846 | GeneBody/5'UTR/1st exon   | <i>NSA2</i>         | -5.058±0.467 | -5.415±0.605 | 1.14E-03 |
| cg02162412 | 5 | 74632926 | TSS200                    | <i>HMGCR</i>        | -5.286±0.43  | -5.624±0.536 | 7.77E-04 |
| cg27061947 | 5 | 74807308 | GeneBody/5'UTR/1st exon   | <i>COL4A3BP</i>     | -5.435±0.465 | -5.79±0.392  | 4.56E-04 |
| cg00165981 | 5 | 74808039 | TSS1500                   | <i>COL4A3BP</i>     | -3.96±0.508  | -4.346±0.49  | 6.04E-04 |
| cg03132911 | 5 | 75698732 | TSS1500                   | <i>IQGAP2</i>       | -5.258±0.558 | -5.726±0.622 | 2.67E-04 |
| cg11591325 | 5 | 76012591 | GeneBody/1st intron       | <i>F2R</i>          | -4.714±0.545 | -5.121±0.617 | 1.03E-03 |
| cg06252849 | 5 | 76326040 | TSS200                    | <i>AGGF1</i>        | -3.584±0.407 | -3.924±0.457 | 2.83E-04 |
| cg04735745 | 5 | 76382885 | GeneBody/5'UTR/1st intron | <i>ZBED3</i>        | -4.789±0.395 | -5.054±0.578 | 5.62E-03 |
| cg21985356 | 5 | 76383200 | TSS200                    | <i>ZBED3</i>        | -4.582±0.413 | -4.932±0.464 | 2.40E-04 |
| cg14119774 | 5 | 76788060 | GeneBody/5'UTR/1st exon   | <i>WDR41</i>        | -4.561±0.499 | -4.851±0.455 | 6.56E-03 |
| cg24231716 | 5 | 76934501 | GeneBody/5'UTR/1st exon   | <i>OTP</i>          | -2.464±0.229 | -2.671±0.26  | 1.10E-04 |
| cg13438543 | 5 | 77071525 | GeneBody/1st intron       | <i>TBCA</i>         | -4.248±0.317 | -4.449±0.243 | 2.63E-03 |
| cg23152667 | 5 | 77072348 | TSS200                    | <i>TBCA</i>         | -3.127±0.362 | -2.874±0.4   | 1.86E-03 |
| cg15009698 | 5 | 77590494 | GeneBody/5'UTR/1st exon   | <i>AP3B1</i>        | -4.532±0.368 | -4.949±0.513 | 8.44E-06 |
| cg18240496 | 5 | 77655777 | TSS1500                   | <i>SCAMP1</i>       | -5.28±0.436  | -5.561±0.401 | 2.76E-03 |
| cg17758148 | 5 | 78573641 | GeneBody/1st intron       | <i>JMY</i>          | 1.704±0.462  | 1.017±0.694  | 9.87E-08 |
| cg20979602 | 5 | 78908130 | TSS200                    | <i>PAPD4</i>        | -4.842±0.35  | -5.146±0.361 | 1.42E-04 |
| cg05577173 | 5 | 78908678 | GeneBody/5'UTR/1st exon   | <i>PAPD4</i>        | -3.911±0.46  | -4.186±0.473 | 6.33E-03 |
| cg26413355 | 5 | 79783674 | TSS200                    | <i>FAM151B</i>      | -4.834±0.507 | -5.22±0.565  | 7.97E-04 |
| cg19184518 | 5 | 79783902 | GeneBody/5'UTR/1st exon   | <i>FAM151B</i>      | -5.468±0.499 | -5.825±0.457 | 1.04E-03 |
| cg07526021 | 5 | 79950611 | GeneBody/1st exon         | <i>MSH3</i>         | -5.401±0.436 | -5.676±0.472 | 4.62E-03 |
| cg16993440 | 5 | 80597283 | GeneBody/1st exon         | <i>LOC100131067</i> | -4.323±0.381 | -4.765±0.45  | 2.97E-06 |
| cg01491225 | 5 | 80597551 | GeneBody/5'UTR/1st intron | <i>ZCCHC9</i>       | -4.893±0.39  | -5.223±0.508 | 3.78E-04 |
| cg22913584 | 5 | 81046758 | GeneBody/1st intron       | <i>SSBP2</i>        | -6.6±0.678   | -7.312±0.663 | 8.80E-06 |
| cg07833035 | 5 | 81573845 | GeneBody/1st intron       | <i>RPS23</i>        | -5.144±0.421 | -5.642±0.541 | 2.95E-06 |
| cg10681725 | 5 | 81574453 | TSS1500                   | <i>RPS23</i>        | -4.377±0.388 | -4.685±0.449 | 5.62E-04 |
| cg25243721 | 5 | 82373346 | GeneBody/5'UTR/1st exon   | <i>XRCC4</i>        | -4.183±0.296 | -4.46±0.277  | 4.34E-05 |
| cg04525496 | 5 | 82767526 | GeneBody/5'UTR/1st exon   | <i>VCAN</i>         | -4.185±0.29  | -4.447±0.399 | 2.18E-04 |
| cg00567749 | 5 | 82767908 | GeneBody/5'UTR/1st intron | <i>VCAN</i>         | -3.633±0.581 | -4.057±0.46  | 6.85E-04 |
| cg20938689 | 5 | 85913915 | GeneBody/1st exon         | <i>COX7C</i>        | -0.655±0.219 | -0.804±0.274 | 3.27E-03 |
| cg16160720 | 5 | 86563744 | TSS1500                   | <i>RASA1</i>        | -4.425±0.237 | -4.796±0.404 | 7.67E-08 |
| cg15664067 | 5 | 86564490 | TSS1500                   | <i>RASA1</i>        | -3.889±0.275 | -4.134±0.414 | 3.83E-04 |
| cg09299307 | 5 | 86709023 | TSS200                    | <i>CCNH</i>         | -4.241±0.333 | -4.571±0.44  | 5.12E-05 |
| cg18287975 | 5 | 88178977 | GeneBody/5'UTR/1st exon   | <i>MEF2C</i>        | -4.873±0.456 | -5.218±0.562 | 1.12E-03 |
| cg08223748 | 5 | 88179260 | GeneBody/5'UTR/1st exon   | <i>MEF2C</i>        | -4.929±0.493 | -5.217±0.504 | 7.29E-03 |
| cg14993293 | 5 | 89705579 | GeneBody/5'UTR/1st exon   | <i>CETN3</i>        | -4.607±0.618 | -4.996±0.498 | 2.95E-03 |
| cg08935243 | 5 | 89705635 | TSS200                    | <i>CETN3</i>        | -5.414±0.426 | -5.884±0.456 | 4.99E-06 |
| cg19369775 | 5 | 89770455 | GeneBody/5'UTR/1st exon   | <i>MBLAC2</i>       | -4.86±0.395  | -5.397±0.49  | 2.06E-07 |
| cg20813773 | 5 | 93953866 | GeneBody/5'UTR/1st intron | <i>KIAA0825</i>     | -5.112±0.427 | -5.426±0.42  | 8.84E-04 |
| cg03975345 | 5 | 93954303 | GeneBody/5'UTR/1st exon   | <i>KIAA0825</i>     | -6.142±0.647 | -6.638±0.546 | 4.33E-04 |
| cg00849368 | 5 | 94890411 | GeneBody/5'UTR/1st intron | <i>TTC37</i>        | -4.917±0.611 | -5.521±0.559 | 1.88E-05 |
| cg03550002 | 5 | 94890897 | GeneBody/5'UTR/1st exon   | <i>ARSK</i>         | -5.012±0.501 | -5.364±0.412 | 1.08E-03 |
| cg24274600 | 5 | 95066816 | TSS200                    | <i>RHOBTB3</i>      | -5.264±0.412 | -5.775±0.611 | 2.66E-06 |

|            |   |           |                           |              |              |              |          |
|------------|---|-----------|---------------------------|--------------|--------------|--------------|----------|
| cg26829318 | 5 | 95158068  | GeneBody/1st intron       | GLRX         | -4.172±0.408 | -4.463±0.492 | 1.90E-03 |
| cg04011402 | 5 | 95188290  | GeneBody/1st exon         | C5orf27      | 1.194±0.09   | 1.275±0.151  | 4.78E-04 |
| cg21091679 | 5 | 95298142  | TSS1500                   | ELL2         | -3.964±0.312 | -4.235±0.401 | 2.67E-04 |
| cg23187653 | 5 | 95769008  | TSS200                    | PCSK1        | -4.036±0.296 | -4.234±0.464 | 7.26E-03 |
| cg14161426 | 5 | 96143592  | GeneBody/5'UTR/1st exon   | ERAP1        | -5.367±0.397 | -5.77±0.495  | 2.95E-05 |
| cg17522249 | 5 | 96144101  | TSS1500                   | ERAP1        | -4.481±0.55  | -4.963±0.496 | 9.77E-05 |
| cg16746462 | 5 | 96270438  | TSS1500                   | LNPEP        | -4.312±0.608 | -4.742±0.641 | 1.48E-03 |
| cg12676081 | 5 | 96518721  | GeneBody/1st intron       | RIOK2        | -3.602±0.392 | -3.874±0.484 | 2.53E-03 |
| cg14081015 | 5 | 96519003  | GeneBody/5'UTR/1st exon   | RIOK2        | -4.279±0.48  | -4.601±0.619 | 3.95E-03 |
| cg13320626 | 5 | 100238655 | GeneBody/1st exon         | ST8SIA4      | -4.255±0.419 | -4.498±0.382 | 6.63E-03 |
| cg04380513 | 5 | 100238983 | GeneBody/5'UTR/1st exon   | ST8SIA4      | -4.739±0.461 | -5.051±0.571 | 3.32E-03 |
| cg21596317 | 5 | 102201545 | GeneBody/5'UTR/1st exon   | PAM          | -3.851±0.294 | -4.159±0.512 | 9.77E-05 |
| cg09671005 | 5 | 102594958 | GeneBody/5'UTR/1st intron | C5orf30      | -5.846±0.498 | -6.2±0.459   | 1.13E-03 |
| cg09000112 | 5 | 107007565 | TSS1500                   | EFNA5        | -4.587±0.384 | -4.873±0.399 | 8.88E-04 |
| cg17225169 | 5 | 108719403 | GeneBody/5'UTR/1st intron | PJA2         | 2.796±0.264  | 2.973±0.213  | 1.61E-03 |
| cg22603964 | 5 | 109024897 | TSS1500                   | MAN2A1       | -5.032±0.401 | -5.496±0.497 | 3.77E-06 |
| cg04020816 | 5 | 109025456 | GeneBody/5'UTR/1st exon   | MAN2A1       | -5.049±0.395 | -5.442±0.536 | 5.40E-05 |
| cg07611177 | 5 | 110074217 | TSS1500                   | SLC25A46     | -4.515±0.481 | -4.84±0.38   | 1.49E-03 |
| cg27610250 | 5 | 110074219 | TSS1500                   | SLC25A46     | -5.174±0.551 | -5.798±0.589 | 3.22E-06 |
| cg05497616 | 5 | 110560372 | GeneBody/1st intron       | CAMK4        | -5.229±0.508 | -5.517±0.489 | 8.37E-03 |
| cg12871124 | 5 | 110848106 | GeneBody/5'UTR/1st exon   | STARD4       | -5.536±0.449 | -6.141±0.643 | 5.31E-07 |
| cg23043119 | 5 | 110848575 | TSS1500                   | STARD4       | -4.762±0.344 | -4.976±0.327 | 4.11E-03 |
| cg03558807 | 5 | 111495981 | TSS1500                   | EPB41L4A-AS1 | 3.339±0.191  | 3.462±0.232  | 4.71E-03 |
| cg21634602 | 5 | 112073570 | GeneBody/5'UTR/1st exon   | APC          | -3.25±0.603  | -3.635±0.636 | 3.80E-03 |
| cg24332422 | 5 | 112073686 | GeneBody/5'UTR/1st intron | APC          | -2.432±0.323 | -2.692±0.372 | 4.66E-04 |
| cg15020645 | 5 | 112073769 | GeneBody/5'UTR/1st intron | APC          | -2.649±0.381 | -2.932±0.41  | 9.34E-04 |
| cg19863003 | 5 | 112257612 | GeneBody/1st intron       | REEP5        | -4.2±0.343   | -4.433±0.496 | 4.80E-03 |
| cg06894812 | 5 | 112630225 | GeneBody/5'UTR/1st exon   | MCC          | -4.559±0.304 | -4.766±0.308 | 2.00E-03 |
| cg24003542 | 5 | 112630684 | TSS200                    | MCC          | -5.242±0.446 | -5.65±0.461  | 7.41E-05 |
| cg16581199 | 5 | 112770721 | GeneBody/5'UTR/1st exon   | TSSK1B       | 2.214±0.245  | 2.056±0.345  | 6.91E-03 |
| cg09868597 | 5 | 112849442 | GeneBody/5'UTR/1st exon   | YTHDC2       | -3.61±0.332  | -3.81±0.258  | 4.03E-03 |
| cg10693071 | 5 | 114516422 | TSS200                    | TRIM36       | -1.815±0.217 | -1.972±0.307 | 2.51E-03 |
| cg03966541 | 5 | 114598433 | GeneBody/1st exon         | PGGT1B       | -5.433±0.377 | -5.714±0.481 | 1.48E-03 |
| cg23941599 | 5 | 114880796 | TSS1500                   | FEM1C        | -2.273±0.234 | -2.452±0.291 | 1.00E-03 |
| cg10575841 | 5 | 114961393 | GeneBody/1st exon         | TMED7        | -5.584±0.606 | -6.172±0.544 | 2.46E-05 |
| cg00645922 | 5 | 114962179 | TSS1500                   | TMED7-TICAM2 | -5.267±0.619 | -5.621±0.467 | 5.94E-03 |
| cg15260250 | 5 | 115177504 | GeneBody/5'UTR/1st exon   | ATG12        | -5.843±0.486 | -6.208±0.521 | 8.49E-04 |
| cg07263984 | 5 | 115177777 | GeneBody/1st exon         | AP3S1        | -5.715±0.707 | -6.114±0.531 | 6.56E-03 |
| cg09573435 | 5 | 115910259 | GeneBody/5'UTR/1st exon   | SEMA6A       | -4.885±0.353 | -5.125±0.372 | 2.15E-03 |
| cg11897314 | 5 | 119799832 | TSS200                    | PRR16        | -3.968±0.362 | -4.282±0.473 | 2.95E-04 |
| cg04963951 | 5 | 121187764 | GeneBody/1st exon         | FTMT         | 3.982±0.373  | 4.197±0.381  | 8.09E-03 |
| cg09262269 | 5 | 121412429 | GeneBody/1st intron       | LOX          | -3.464±0.45  | -3.751±0.531 | 4.97E-03 |
| cg22836153 | 5 | 121412702 | GeneBody/5'UTR/1st exon   | LOX          | -4.648±0.337 | -4.946±0.511 | 4.21E-04 |
| cg01429321 | 5 | 121413797 | GeneBody/5'UTR/1st exon   | LOX          | -3.943±0.338 | -4.251±0.473 | 2.07E-04 |
| cg22282672 | 5 | 121465223 | GeneBody/5'UTR/1st exon   | ZNF474       | -2.517±0.295 | -2.701±0.335 | 5.50E-03 |
| cg17425616 | 5 | 122110491 | TSS200                    | SNX2         | -2.39±0.156  | -2.524±0.224 | 4.40E-04 |
| cg01064957 | 5 | 122110867 | GeneBody/5'UTR/1st exon   | SNX2         | -4.084±0.282 | -4.373±0.386 | 3.59E-05 |
| cg20470275 | 5 | 122180934 | TSS1500                   | SNX24        | -4.981±0.355 | -5.328±0.453 | 5.35E-05 |
| cg20708411 | 5 | 122847581 | TSS1500                   | C5orf1G3     | -4.145±0.387 | -4.494±0.511 | 1.85E-04 |
| cg15165084 | 5 | 125759291 | GeneBody/5'UTR/1st exon   | GRAMD3       | -5.259±0.407 | -5.787±0.468 | 4.49E-07 |
| cg19298821 | 5 | 125967357 | TSS200                    | C5orf48      | 2.469±0.218  | 2.636±0.255  | 8.83E-04 |
| cg20986134 | 5 | 126112439 | GeneBody/5'UTR/1st exon   | LMNB1        | -4.573±0.412 | -5.03±0.624  | 1.79E-05 |
| cg06465021 | 5 | 127418547 | GeneBody/1st intron       | FLJ33630     | -4.391±0.221 | -4.546±0.295 | 2.82E-03 |
| cg15034135 | 5 | 128796168 | GeneBody/1st exon         | ADAMTS19     | -4.893±0.383 | -5.424±0.488 | 1.58E-07 |
| cg14645481 | 5 | 130501199 | TSS200                    | HINT1        | -3.29±0.399  | -3.577±0.541 | 2.43E-03 |
| cg20168375 | 5 | 130506476 | TSS200                    | LYRM7        | -4.728±0.292 | -4.899±0.302 | 7.45E-03 |
| cg00751288 | 5 | 130506785 | GeneBody/1st intron       | LYRM7        | -5.444±0.422 | -5.744±0.411 | 1.21E-03 |
| cg11212312 | 5 | 131395683 | TSS1500                   | IL3          | 2.11±0.214   | 2.279±0.254  | 6.74E-04 |
| cg13259290 | 5 | 131408382 | TSS1500                   | CSF2         | 0.86±0.215   | 1.021±0.249  | 1.05E-03 |
| cg26229274 | 5 | 131629510 | TSS1500                   | SLC22A4      | -5.439±0.434 | -6.009±0.492 | 3.22E-07 |
| cg27372468 | 5 | 131630212 | GeneBody/5'UTR/1st exon   | SLC22A4      | -4.861±0.379 | -5.384±0.513 | 2.19E-07 |
| cg05915281 | 5 | 131826479 | TSS200                    | IRF1         | -5.372±0.46  | -5.706±0.426 | 9.10E-04 |
| cg24974130 | 5 | 131893006 | GeneBody/5'UTR/1st exon   | RAD50        | -4.678±0.334 | -5.01±0.52   | 1.02E-04 |
| cg26787239 | 5 | 132008525 | TSS1500                   | IL4          | 2.841±0.154  | 3.026±0.266  | 1.16E-05 |
| cg18840461 | 5 | 132148865 | TSS200                    | SOWAHA       | -4.218±0.341 | -4.417±0.359 | 7.81E-03 |
| cg10458581 | 5 | 132202244 | TSS200                    | UQCRCQ       | -5.671±0.56  | -6.055±0.429 | 1.21E-03 |
| cg05040447 | 5 | 132202635 | GeneBody                  | UQCRCQ       | -5.529±0.443 | -5.893±0.526 | 4.12E-04 |
| cg27440002 | 5 | 132208244 | TSS1500                   | LEAP2        | 1.431±0.261  | 1.245±0.342  | 2.45E-03 |
| cg07236381 | 5 | 132299266 | GeneBody/5'UTR/1st exon   | AFF4         | -4.564±0.481 | -4.856±0.514 | 5.95E-03 |
| cg01422136 | 5 | 132362224 | GeneBody/1st exon         | ZCCHC10      | -5.219±0.543 | -5.675±0.576 | 2.34E-04 |
| cg08801754 | 5 | 132363022 | TSS1500                   | ZCCHC10      | 1.507±0.145  | 1.676±0.242  | 1.48E-05 |
| cg22065439 | 5 | 133304001 | GeneBody/1st intron       | C5orf15      | -4.354±0.53  | -4.773±0.483 | 3.46E-04 |
| cg25141995 | 5 | 133341459 | TSS1500                   | VDAC1        | -0.535±0.27  | -0.325±0.304 | 6.56E-04 |
| cg01116966 | 5 | 133450017 | TSS1500                   | TCF7         | -5.654±0.436 | -6.119±0.617 | 2.39E-05 |
| cg26074851 | 5 | 133512410 | GeneBody/5'UTR/1st intron | SKP1         | -5.662±0.596 | -6.135±0.622 | 4.42E-04 |
| cg21703138 | 5 | 133561950 | GeneBody/5'UTR/1st exon   | PPP2CA       | -5.418±0.548 | -5.893±0.581 | 1.56E-04 |
| cg27543230 | 5 | 133562604 | TSS1500                   | PPP2CA       | -3.498±0.28  | -3.675±0.279 | 3.73E-03 |
| cg09693433 | 5 | 133702574 | GeneBody/5'UTR/1st intron | CDKL3        | -4.703±0.278 | -4.908±0.393 | 2.19E-03 |
| cg06296021 | 5 | 133702588 | GeneBody/5'UTR/1st intron | CDKL3        | -4.594±0.345 | -4.823±0.444 | 4.26E-03 |
| cg08513100 | 5 | 133706722 | TSS200                    | UBE2B        | -4.135±0.373 | -4.399±0.554 | 3.78E-03 |
| cg00943950 | 5 | 133706921 | GeneBody/5'UTR/1st exon   | UBE2B        | -3.721±0.248 | -4.061±0.427 | 1.15E-06 |
| cg04590931 | 5 | 133861743 | TSS200                    | PHF15        | -5.858±0.454 | -6.428±0.708 | 2.79E-06 |
| cg10441365 | 5 | 133968626 | TSS200                    | SAR1B        | -5.191±0.406 | -5.455±0.487 | 4.41E-03 |
| cg11141561 | 5 | 134074404 | GeneBody/1st exon         | CAMLG        | -5.678±0.601 | -6.12±0.652  | 1.07E-03 |
| cg00520708 | 5 | 134181266 | TSS200                    | C5orf24      | -2.178±0.437 | -2.654±0.507 | 7.84E-06 |
| cg06953768 | 5 | 134181484 | GeneBody/5'UTR/1st intron | C5orf24      | -2.316±0.366 | -2.546±0.508 | 8.09E-03 |
| cg02352653 | 5 | 135469115 | GeneBody/5'UTR/1st intron | SMAD5        | -4.258±0.392 | -4.522±0.469 | 3.22E-03 |
| cg02770814 | 5 | 137368293 | GeneBody/5'UTR/1st intron | FAM13B       | -5.157±0.354 | -5.385±0.391 | 3.97E-03 |
| cg09513026 | 5 | 137419242 | TSS1500                   | WNT8A        | 2.221±0.157  | 2.335±0.192  | 1.63E-03 |
| cg07430605 | 5 | 137514261 | GeneBody/1st intron       | BRD8         | -4.914±0.223 | -5.112±0.259 | 1.67E-04 |
| cg13581941 | 5 | 137548929 | GeneBody/1st exon         | CDC23        | -5.993±0.612 | -6.347±0.485 | 5.73E-03 |
| cg09350274 | 5 | 137610396 | TSS200                    | GFR3         | -3.66±0.304  | -3.872±0.349 | 2.07E-03 |
| cg14784788 | 5 | 137667435 | GeneBody/5'UTR/1st exon   | CDC25C       | -4.84±0.348  | -5.14±0.484  | 3.93E-04 |
| cg22748850 | 5 | 137667638 | TSS200                    | CDC25C       | -4.518±0.369 | -4.759±0.347 | 2.60E-03 |
| cg18986273 | 5 | 137673771 | GeneBody/5'UTR/1st exon   | FAM53C       | -3.069±0.534 | -3.578±0.624 | 5.76E-05 |

|            |   |           |                           |            |              |              |          |
|------------|---|-----------|---------------------------|------------|--------------|--------------|----------|
| cg27264345 | 5 | 137775041 | GeneBody/1st intron       | REEP2      | -4.108±0.367 | -4.317±0.345 | 7.94E-03 |
| cg26069252 | 5 | 137800343 | TSS1500                   | EGR1       | -4.512±0.26  | -4.796±0.418 | 3.18E-05 |
| cg01936124 | 5 | 137878512 | GeneBody                  | ETF1       | -5.213±0.354 | -5.435±0.451 | 6.62E-03 |
| cg08902132 | 5 | 137879323 | TSS1500                   | ETF1       | -5.124±0.529 | -5.439±0.614 | 7.97E-03 |
| cg13859216 | 5 | 137910711 | GeneBody/1st intron       | HSPA9      | -5.316±0.41  | -5.633±0.352 | 4.07E-04 |
| cg01037108 | 5 | 137911220 | GeneBody/5'UTR/1st exon   | HSPA9      | -4.369±0.284 | -4.544±0.275 | 4.44E-03 |
| cg07874155 | 5 | 138089656 | GeneBody/5'UTR/1st intron | CTNNA1     | -5.551±0.389 | -5.977±0.558 | 1.68E-05 |
| cg00213331 | 5 | 138463463 | GeneBody                  | SIL1       | 2.547±0.239  | 2.706±0.264  | 2.84E-03 |
| cg13326338 | 5 | 138463619 | GeneBody/5'UTR            | SIL1       | 3.887±0.204  | 4.112±0.299  | 1.60E-05 |
| cg22409383 | 5 | 138609379 | TSS200                    | SNHG4      | -5.453±0.608 | -6.013±0.544 | 4.89E-05 |
| cg06302803 | 5 | 138609953 | GeneBody/1st intron       | SNHG4      | -4.492±0.458 | -4.872±0.573 | 4.25E-04 |
| cg11905589 | 5 | 138677334 | TSS200                    | PAIP2      | -2.915±0.415 | -3.172±0.494 | 6.31E-03 |
| cg26392924 | 5 | 138718812 | GeneBody/1st intron       | SLC23A1    | -2.566±0.227 | -2.756±0.348 | 8.19E-04 |
| cg19569684 | 5 | 138726419 | TSS1500                   | MBZ1       | 2.204±0.18   | 2.377±0.292  | 2.08E-04 |
| cg18805835 | 5 | 138775054 | GeneBody/1st intron       | DNAJC18    | -2.21±0.182  | -2.396±0.272 | 5.76E-05 |
| cg10356060 | 5 | 138775106 | GeneBody/1st exon         | DNAJC18    | -4.94±0.537  | -5.461±0.601 | 3.97E-05 |
| cg23261102 | 5 | 138775214 | GeneBody/5'UTR/1st exon   | DNAJC18    | -4.256±0.359 | -4.611±0.483 | 5.62E-05 |
| cg11713336 | 5 | 138940474 | TSS1500                   | UBE2D2     | -4.917±0.356 | -5.15±0.329  | 2.45E-03 |
| cg27152280 | 5 | 139423077 | TSS200                    | NRG2       | -4.923±0.246 | -5.222±0.424 | 9.38E-06 |
| cg15563057 | 5 | 139493612 | TSS200                    | PURA       | -4.563±0.383 | -4.847±0.551 | 2.22E-03 |
| cg03529436 | 5 | 139554541 | TSS200                    | CYSTM1     | -4.936±0.281 | -5.205±0.304 | 4.44E-05 |
| cg04135543 | 5 | 139554816 | GeneBody/5'UTR/1st exon   | CYSTM1     | -3.717±0.227 | -3.975±0.348 | 1.28E-05 |
| cg25132078 | 5 | 139682347 | GeneBody/1st intron       | PFDN1      | -4.624±0.352 | -5.014±0.464 | 9.38E-06 |
| cg07697078 | 5 | 139682675 | GeneBody/5'UTR/1st exon   | PFDN1      | -4.739±0.635 | -5.19±0.544  | 1.01E-03 |
| cg20868410 | 5 | 139726466 | TSS1500                   | HBEGF      | -4.579±0.293 | -4.952±0.499 | 3.81E-06 |
| cg08918431 | 5 | 139781174 | TSS1500                   | ANKHD1     | -5.536±0.565 | -6.081±0.546 | 3.09E-05 |
| cg10731022 | 5 | 139927252 | GeneBody/5'UTR/1st exon   | EIF4EBP3   | -5.664±0.604 | -6.014±0.599 | 7.52E-03 |
| cg08948050 | 5 | 139943173 | GeneBody                  | APBB3      | 3.034±0.176  | 3.209±0.278  | 1.14E-04 |
| cg20021244 | 5 | 139944115 | GeneBody/5'UTR/1st exon   | APBB3      | -6.138±0.583 | -6.861±0.661 | 8.58E-07 |
| cg02995853 | 5 | 139944272 | TSS200                    | APBB3      | -4.157±0.276 | -4.493±0.426 | 4.43E-06 |
| cg06994793 | 5 | 140018911 | TSS200                    | TMCO6      | -5.131±0.384 | -5.565±0.619 | 1.88E-05 |
| cg00916199 | 5 | 140019287 | GeneBody/1st intron       | TMCO6      | -5.079±0.422 | -5.483±0.601 | 1.12E-04 |
| cg09507928 | 5 | 140027484 | GeneBody/1st exon         | MIR3655    | -5.683±0.597 | -6.121±0.642 | 1.07E-03 |
| cg06177968 | 5 | 140044542 | GeneBody/1st exon         | WDR55      | -3.938±0.3   | -4.162±0.316 | 8.76E-04 |
| cg01500421 | 5 | 140070872 | TSS200                    | HARS2      | -4.471±0.432 | -4.731±0.549 | 9.14E-03 |
| cg06225581 | 5 | 140080094 | GeneBody/1st intron       | ZMAT2      | -4.317±0.384 | -4.616±0.425 | 5.96E-04 |
| cg19867899 | 5 | 140345819 | GeneBody/5'UTR/1st exon   | PCDHAC2    | -3.996±0.518 | -4.29±0.475  | 7.95E-03 |
| cg03513163 | 5 | 140431149 | GeneBody/1st exon         | PCDHB1     | -3.109±0.415 | -3.425±0.461 | 8.11E-04 |
| cg02087637 | 5 | 140557483 | GeneBody/5'UTR/1st exon   | PCDHB8     | -2.129±0.34  | -2.348±0.302 | 2.64E-03 |
| cg27124774 | 5 | 140571888 | TSS200                    | PCDHB10    | -3.35±0.517  | -3.707±0.473 | 1.45E-03 |
| cg05898102 | 5 | 140571959 | GeneBody/5'UTR/1st exon   | PCDHB10    | -3.512±0.307 | -3.782±0.447 | 3.79E-04 |
| cg14592099 | 5 | 140593663 | GeneBody/5'UTR/1st exon   | PCDHB13    | -3.039±0.336 | -3.254±0.355 | 3.69E-03 |
| cg26282384 | 5 | 140767200 | TSS1500                   | PCDHGB4    | -3.396±0.436 | -3.653±0.411 | 6.13E-03 |
| cg04284814 | 5 | 141016114 | GeneBody                  | HDAC3      | -4.407±0.418 | -4.748±0.472 | 3.95E-04 |
| cg11064797 | 5 | 141016628 | GeneBody/5'UTR/1st exon   | RELL2      | -4.046±0.219 | -4.354±0.44  | 2.45E-06 |
| cg24385322 | 5 | 141017773 | GeneBody/5'UTR            | RELL2      | -4.773±0.395 | -4.994±0.381 | 9.53E-03 |
| cg10414058 | 5 | 141017903 | GeneBody                  | RELL2      | -2.423±0.315 | -2.747±0.391 | 2.40E-05 |
| cg09985635 | 5 | 141258958 | TSS1500                   | PCDH1      | -4.632±0.397 | -4.971±0.442 | 2.09E-04 |
| cg16821394 | 5 | 141488611 | GeneBody/1st intron       | NDFIP1     | -5.287±0.491 | -5.768±0.512 | 2.88E-05 |
| cg20044189 | 5 | 141704548 | GeneBody/5'UTR/1st exon   | SPRY4      | -6.316±0.555 | -6.85±0.553  | 3.37E-05 |
| cg03328750 | 5 | 142150401 | GeneBody/1st exon         | ARHGAP26   | -3.946±0.263 | -4.189±0.392 | 2.28E-04 |
| cg08367838 | 5 | 143549786 | GeneBody/5'UTR/1st intron | YIPF5      | -3.762±0.549 | -4.148±0.562 | 1.52E-03 |
| cg23513690 | 5 | 145316101 | TSS200                    | SH3RF2     | -5.298±0.564 | -5.74±0.506  | 3.80E-04 |
| cg08017606 | 5 | 145316274 | GeneBody/5'UTR/1st intron | SH3RF2     | -3.485±0.488 | -3.815±0.48  | 2.00E-03 |
| cg18482268 | 5 | 145718965 | GeneBody/1st intron       | POU4F3     | -3.154±0.256 | -3.403±0.414 | 1.76E-04 |
| cg17638137 | 5 | 145826831 | TSS200                    | TCERG1     | -4.735±0.379 | -4.996±0.355 | 1.53E-03 |
| cg09189322 | 5 | 145827172 | GeneBody/1st intron       | TCERG1     | -5.042±0.35  | -5.301±0.378 | 1.01E-03 |
| cg11572744 | 5 | 146832933 | GeneBody/1st intron       | DPYSL3     | -4.45±0.426  | -4.851±0.558 | 9.83E-05 |
| cg00834796 | 5 | 147161924 | GeneBody/5'UTR/1st intron | JAKMIP2    | -2.935±0.261 | -3.112±0.308 | 2.79E-03 |
| cg04577715 | 5 | 147211181 | GeneBody/5'UTR/1st exon   | SPINK1     | 3.409±0.244  | 3.565±0.197  | 2.47E-03 |
| cg25847835 | 5 | 147763803 | GeneBody/5'UTR/1st intron | FBXO38     | -4.156±0.198 | -4.298±0.229 | 1.58E-03 |
| cg01965939 | 5 | 148442694 | GeneBody/5'UTR/1st exon   | SH3TC2     | -1.764±0.291 | -1.957±0.429 | 6.17E-03 |
| cg10328462 | 5 | 148724862 | TSS200                    | GRPEL2     | -5.318±0.347 | -5.81±0.555  | 3.68E-07 |
| cg08680102 | 5 | 148725324 | GeneBody/1st intron       | GRPEL2     | -5.235±0.319 | -5.533±0.556 | 4.20E-04 |
| cg00298357 | 5 | 148758791 | GeneBody/5'UTR/1st exon   | IL17B      | 2.792±0.194  | 2.927±0.303  | 5.27E-03 |
| cg05607472 | 5 | 148930374 | TSS1500                   | C5NK1A1    | -5.844±0.585 | -6.305±0.659 | 5.52E-04 |
| cg06899802 | 5 | 148931087 | GeneBody/5'UTR/1st exon   | C5NK1A1    | -5.73±0.595  | -6.166±0.538 | 7.96E-04 |
| cg15219393 | 5 | 149109878 | GeneBody/5'UTR/1st exon   | PPARGC1B   | -3.307±0.675 | -3.807±0.71  | 9.39E-04 |
| cg18915143 | 5 | 149323959 | GeneBody/1st exon         | PDE6A      | 3.144±0.184  | 3.25±0.195   | 8.95E-03 |
| cg13237906 | 5 | 149340052 | TSS1500                   | SLC26A2    | -5.771±0.493 | -6.285±0.517 | 1.15E-05 |
| cg25054311 | 5 | 149340861 | GeneBody/5'UTR/1st intron | SLC26A2    | -3.138±0.343 | -3.426±0.436 | 3.85E-04 |
| cg05382565 | 5 | 149380781 | TSS200                    | TIGD6      | -4.994±0.438 | -5.389±0.408 | 6.84E-05 |
| cg12727795 | 5 | 149535695 | TSS1500                   | PDGFRB     | -3.927±0.286 | -4.112±0.384 | 5.95E-03 |
| cg19928046 | 5 | 149792249 | GeneBody/1st exon         | CD74       | -4.364±0.386 | -4.617±0.427 | 3.33E-03 |
| cg01982455 | 5 | 149829250 | GeneBody/5'UTR/1st intron | RPS14      | -4.703±0.675 | -5.16±0.561  | 1.54E-03 |
| cg07155664 | 5 | 149829590 | TSS1500                   | RPS14      | -5.013±0.593 | -5.532±0.529 | 9.43E-05 |
| cg13590277 | 5 | 150019496 | TSS1500                   | SYNPO      | -1.343±0.243 | -1.536±0.318 | 7.79E-04 |
| cg21516478 | 5 | 150400328 | GeneBody/1st intron       | GPX3       | -3.274±0.188 | -3.406±0.308 | 5.45E-03 |
| cg12483860 | 5 | 150460615 | GeneBody/5'UTR/1st exon   | TNIP1      | -4.412±0.31  | -4.677±0.434 | 4.55E-04 |
| cg03197524 | 5 | 150460989 | TSS1500                   | TNIP1      | -4.203±0.453 | -4.676±0.502 | 1.26E-05 |
| cg22775896 | 5 | 150632248 | TSS1500                   | GM2A       | -5.037±0.543 | -5.487±0.592 | 2.95E-04 |
| cg08724474 | 5 | 150827012 | TSS200                    | SLC36A1    | -5.065±0.464 | -5.352±0.4   | 3.54E-03 |
| cg14104257 | 5 | 150827447 | GeneBody/5'UTR/1st intron | SLC36A1    | -4.969±0.358 | -5.324±0.467 | 4.96E-05 |
| cg08331313 | 5 | 151066460 | GeneBody/5'UTR/1st exon   | SPARC      | -4.687±0.477 | -4.979±0.586 | 7.46E-03 |
| cg21101222 | 5 | 151138161 | GeneBody/5'UTR/1st exon   | ATOX1      | -6.107±0.567 | -6.716±0.572 | 6.67E-06 |
| cg06746171 | 5 | 151138551 | TSS1500                   | ATOX1      | -4.376±0.449 | -4.637±0.451 | 7.39E-03 |
| cg26361928 | 5 | 151151522 | GeneBody/5'UTR/1st exon   | G3BP1      | -5.244±0.623 | -5.941±0.665 | 3.95E-06 |
| cg22230395 | 5 | 153418202 | GeneBody/5'UTR/1st intron | FAM114A2   | -4.773±0.402 | -5.277±0.529 | 1.22E-06 |
| cg17034082 | 5 | 153418793 | GeneBody/5'UTR/1st intron | MFAP3      | -4.616±0.415 | -4.872±0.483 | 6.35E-03 |
| cg02141675 | 5 | 153569408 | TSS1500                   | GALNT10    | -4.401±0.404 | -4.646±0.334 | 4.12E-03 |
| cg26565838 | 5 | 153570764 | GeneBody/1st intron       | GALNT10    | -3.628±0.342 | -3.849±0.411 | 4.61E-03 |
| cg09545860 | 5 | 153825063 | GeneBody/1st intron       | SAP30L-AS1 | -4.425±0.355 | -4.705±0.408 | 5.83E-04 |
| cg07927484 | 5 | 153826296 | GeneBody/1st exon         | SAP30L     | -4.636±0.324 | -5.066±0.498 | 9.44E-07 |
| cg00405677 | 5 | 153858102 | TSS1500                   | HAND1      | -3.276±0.262 | -3.572±0.404 | 1.48E-05 |
| cg10214058 | 5 | 154238169 | TSS200                    | CNOT8      | -4.138±0.497 | -4.494±0.554 | 1.52E-03 |

|            |   |           |                           |                 |              |              |          |
|------------|---|-----------|---------------------------|-----------------|--------------|--------------|----------|
| cg04730731 | 5 | 154317555 | GeneBody/1st exon         | <i>GEMIN5</i>   | -4.899±0.256 | -5.128±0.286 | 1.22E-04 |
| cg04435420 | 5 | 155754009 | GeneBody/5'UTR/1st exon   | <i>SGCD</i>     | -2.285±0.398 | -2.545±0.49  | 4.45E-03 |
| cg08519865 | 5 | 156569391 | GeneBody/5'UTR/1st intron | <i>MED7</i>     | -4.524±0.281 | -4.684±0.272 | 8.45E-03 |
| cg18587018 | 5 | 156569965 | TSS200                    | <i>MED7</i>     | -4.961±0.408 | -5.312±0.341 | 1.08E-04 |
| cg26790059 | 5 | 156772562 | GeneBody/5'UTR/1st exon   | <i>FNDC9</i>    | 2.659±0.297  | 2.856±0.412  | 5.17E-03 |
| cg07540118 | 5 | 157002713 | GeneBody/5'UTR/1st exon   | <i>ADAM19</i>   | -4.329±0.492 | -4.688±0.533 | 1.16E-03 |
| cg06200339 | 5 | 157079404 | GeneBody/5'UTR/1st exon   | <i>SOX30</i>    | 2.211±0.299  | 2.402±0.364  | 5.14E-03 |
| cg05189291 | 5 | 157158457 | GeneBody/1st exon         | <i>THG1L</i>    | -5.091±0.772 | -5.586±0.741 | 3.14E-03 |
| cg05056120 | 5 | 158527702 | TSS1500                   | <i>EBF1</i>     | -2.654±0.153 | -2.765±0.221 | 2.70E-03 |
| cg01657408 | 5 | 158634989 | GeneBody/5'UTR/1st exon   | <i>RNF145</i>   | -4.133±0.268 | -4.488±0.394 | 7.61E-07 |
| cg07444907 | 5 | 158690182 | GeneBody/5'UTR/1st exon   | <i>UBLCP1</i>   | -4.936±0.529 | -5.315±0.522 | 1.15E-03 |
| cg09038885 | 5 | 159343148 | TSS1500                   | <i>ADRA1B</i>   | -3.779±0.294 | -4.096±0.407 | 1.79E-05 |
| cg01222684 | 5 | 159435961 | TSS1500                   | <i>TTC1</i>     | -2.228±0.318 | -1.799±0.523 | 1.10E-06 |
| cg22956315 | 5 | 159435973 | TSS1500                   | <i>TTC1</i>     | -4.913±0.598 | -5.25±0.474  | 7.09E-03 |
| cg10534672 | 5 | 159797275 | GeneBody/1st intron       | <i>C1QTNF2</i>  | -3.259±0.296 | -3.439±0.394 | 9.24E-03 |
| cg22227058 | 5 | 159846119 | GeneBody/5'UTR/1st exon   | <i>SLU7</i>     | -4.851±0.605 | -5.188±0.549 | 9.00E-03 |
| cg07592353 | 5 | 161113339 | GeneBody                  | <i>GABRA6</i>   | 2.477±0.213  | 2.604±0.259  | 8.68E-03 |
| cg24523000 | 5 | 161273839 | TSS1500                   | <i>GABRA1</i>   | -1.626±0.311 | -1.835±0.342 | 2.67E-03 |
| cg18219951 | 5 | 161494810 | GeneBody/5'UTR/1st exon   | <i>GABRG2</i>   | -3.854±0.483 | -4.182±0.589 | 3.07E-03 |
| cg19545851 | 5 | 162887280 | TSS200                    | <i>NUDCD2</i>   | -5.066±0.319 | -5.487±0.488 | 9.74E-07 |
| cg17329249 | 5 | 162930325 | GeneBody/5'UTR/1st exon   | <i>MAT2B</i>    | -4.738±0.483 | -5.08±0.488  | 1.35E-03 |
| cg16802646 | 5 | 167718483 | TSS1500                   | <i>VWC1</i>     | -4.373±0.6   | -4.899±0.53  | 9.26E-05 |
| cg24809768 | 5 | 167914047 | GeneBody/1st intron       | <i>RARS</i>     | -4.659±0.36  | -5.115±0.474 | 9.99E-07 |
| cg19905251 | 5 | 168728495 | TSS1500                   | <i>SLIT3</i>    | -4.369±0.392 | -4.748±0.498 | 6.29E-05 |
| cg11119131 | 5 | 169010837 | GeneBody/5'UTR/1st exon   | <i>SPDL1</i>    | -4.568±0.564 | -5±0.563     | 5.96E-04 |
| cg22646937 | 5 | 169816792 | TSS200                    | <i>KCNMB1</i>   | -0.306±0.19  | -0.472±0.22  | 1.75E-04 |
| cg14039952 | 5 | 170815461 | GeneBody/1st intron       | <i>NPM1</i>     | -3.996±0.382 | -4.279±0.553 | 2.20E-03 |
| cg23434919 | 5 | 171615056 | GeneBody/5'UTR/1st exon   | <i>STK10</i>    | -5.354±0.566 | -5.767±0.573 | 1.03E-03 |
| cg00076645 | 5 | 171711562 | TSS1500                   | <i>UBTD2</i>    | -4.467±0.576 | -4.91±0.61   | 6.31E-04 |
| cg17429424 | 5 | 172197911 | GeneBody/1st exon         | <i>DUSP1</i>    | -5.709±0.484 | -6.053±0.465 | 1.21E-03 |
| cg22229034 | 5 | 172198031 | GeneBody/5'UTR/1st exon   | <i>DUSP1</i>    | -5.531±0.55  | -5.968±0.757 | 9.29E-04 |
| cg17946497 | 5 | 172198141 | GeneBody/5'UTR/1st exon   | <i>DUSP1</i>    | -5.553±0.54  | -6.036±0.624 | 1.30E-04 |
| cg04060275 | 5 | 172198791 | TSS1500                   | <i>DUSP1</i>    | -5.177±0.447 | -5.5±0.488   | 1.33E-03 |
| cg15947959 | 5 | 172261155 | TSS200                    | <i>ERGIC1</i>   | -3.291±0.236 | -3.452±0.378 | 6.68E-03 |
| cg17304433 | 5 | 172261515 | GeneBody/1st intron       | <i>ERGIC1</i>   | -4.841±0.376 | -5.124±0.45  | 1.09E-03 |
| cg14134153 | 5 | 172386668 | GeneBody/5'UTR/1st intron | <i>RPL26L1</i>  | -2.859±0.436 | -2.425±0.61  | 6.14E-05 |
| cg20225275 | 5 | 172410975 | GeneBody/1st intron       | <i>ATP6V0E1</i> | -4.295±0.392 | -4.62±0.54   | 5.92E-04 |
| cg04960652 | 5 | 172571539 | GeneBody/5'UTR/1st exon   | <i>BNIP1</i>    | -4.926±0.634 | -5.479±0.613 | 1.17E-04 |
| cg01282074 | 5 | 172662328 | TSS200                    | <i>NKX2-5</i>   | -3.778±0.519 | -4.091±0.56  | 6.50E-03 |
| cg12598575 | 5 | 173043653 | GeneBody/5'UTR/1st exon   | <i>BOD1</i>     | -5.404±0.449 | -5.723±0.503 | 1.65E-03 |
| cg14243026 | 5 | 173472698 | GeneBody/5'UTR/1st exon   | <i>HMP19</i>    | -4.987±0.294 | -5.205±0.513 | 4.39E-03 |
| cg09801842 | 5 | 174905852 | GeneBody/5'UTR/1st intron | <i>SFXN1</i>    | -5.537±0.556 | -5.869±0.574 | 6.38E-03 |
| cg20277670 | 5 | 175110375 | GeneBody/1st exon         | <i>HRH2</i>     | 4.747±0.312  | 4.965±0.316  | 1.59E-03 |
| cg22776578 | 5 | 175223497 | TSS200                    | <i>CPLX2</i>    | -3.303±0.382 | -3.604±0.434 | 5.88E-04 |
| cg16233911 | 5 | 175395445 | TSS200                    | <i>THOC3</i>    | -4.647±0.419 | -4.951±0.543 | 1.95E-03 |
| cg17398003 | 5 | 175665565 | GeneBody/1st exon         | <i>SIMC1</i>    | -5.4±0.656   | -5.843±0.601 | 1.80E-03 |
| cg08725962 | 5 | 175792493 | TSS200                    | <i>ARL10</i>    | -5.89±0.509  | -6.463±0.596 | 4.70E-06 |
| cg27164762 | 5 | 175815688 | GeneBody/5'UTR/1st exon   | <i>NOP16</i>    | -5.304±0.331 | -5.589±0.612 | 1.42E-03 |
| cg07510052 | 5 | 175815825 | GeneBody/1st exon         | <i>HIGD2A</i>   | -2.695±0.263 | -2.863±0.267 | 3.50E-03 |
| cg10082991 | 5 | 175964280 | GeneBody/5'UTR/1st exon   | <i>RNF44</i>    | -4.069±0.288 | -3.83±0.333  | 3.32E-04 |
| cg08283293 | 5 | 175964814 | TSS1500                   | <i>RNF44</i>    | -5.039±0.339 | -5.25±0.339  | 4.43E-03 |
| cg02404843 | 5 | 176037404 | TSS1500                   | <i>GPRIN1</i>   | -5.567±0.46  | -5.896±0.462 | 1.20E-03 |
| cg02616808 | 5 | 176236654 | TSS1500                   | <i>UNC5A</i>    | -4.045±0.358 | -4.377±0.47  | 1.20E-04 |
| cg06720424 | 5 | 176433271 | GeneBody/5'UTR/1st intron | <i>UIMC1</i>    | -5.988±0.461 | -6.411±0.549 | 1.03E-04 |
| cg24504986 | 5 | 176449842 | GeneBody/1st exon         | <i>ZNF346</i>   | -4.704±0.51  | -5.036±0.662 | 5.08E-03 |
| cg27294629 | 5 | 176513704 | TSS1500                   | <i>FGFR4</i>    | -2.852±0.472 | -3.138±0.62  | 9.42E-03 |
| cg11316784 | 5 | 176560594 | TSS1500                   | <i>NSD1</i>     | -5.59±0.66   | -6.201±0.641 | 5.32E-05 |
| cg07880061 | 5 | 176730198 | GeneBody/1st exon         | <i>RAB24</i>    | -5.21±0.529  | -5.585±0.629 | 1.89E-03 |
| cg18824775 | 5 | 176731107 | GeneBody/1st intron       | <i>PRELID1</i>  | -5.836±0.446 | -6.167±0.448 | 8.35E-04 |
| cg09564133 | 5 | 176738847 | GeneBody/5'UTR/1st exon   | <i>MXD3</i>     | -3.758±0.236 | -3.927±0.316 | 2.43E-03 |
| cg02693857 | 5 | 176738937 | GeneBody/5'UTR/1st exon   | <i>MXD3</i>     | -4.45±0.36   | -4.721±0.357 | 7.14E-04 |
| cg21751787 | 5 | 176778504 | GeneBody/1st exon         | <i>LMAN2</i>    | -5.26±0.32   | -5.493±0.446 | 2.35E-03 |
| cg06625767 | 5 | 176836695 | TSS200                    | <i>F12</i>      | 1.921±0.251  | 2.072±0.293  | 7.63E-03 |
| cg21424904 | 5 | 176853466 | TSS1500                   | <i>GRK6</i>     | -4.524±0.355 | -4.722±0.342 | 9.77E-03 |
| cg27116713 | 5 | 176853836 | GeneBody/5'UTR/1st exon   | <i>GRK6</i>     | -6.351±0.451 | -6.718±0.564 | 5.40E-04 |
| cg01805784 | 5 | 176873808 | GeneBody/5'UTR/1st exon   | <i>PRR7</i>     | -5.332±0.572 | -5.837±0.6   | 1.19E-04 |
| cg14920426 | 5 | 176924420 | GeneBody/5'UTR/1st intron | <i>PDLIM7</i>   | -4.107±0.183 | -4.236±0.182 | 1.37E-03 |
| cg09572106 | 5 | 176924899 | TSS1500                   | <i>PDLIM7</i>   | -5.479±0.557 | -6.049±0.497 | 1.08E-05 |
| cg00483154 | 5 | 176943504 | GeneBody                  | <i>DDX41</i>    | -4.794±0.365 | -5.08±0.437  | 7.21E-04 |
| cg10948883 | 5 | 176944132 | TSS200                    | <i>DDX41</i>    | -5.846±0.568 | -6.472±0.636 | 5.88E-06 |
| cg15437432 | 5 | 177018986 | TSS1500                   | <i>TMED9</i>    | -4.027±0.401 | -4.354±0.562 | 7.77E-04 |
| cg11313997 | 5 | 177027589 | GeneBody/1st intron       | <i>B4GALT7</i>  | -5.067±0.397 | -5.422±0.501 | 1.77E-04 |
| cg16257040 | 5 | 177557700 | TSS1500                   | <i>RMND5B</i>   | -5.475±0.565 | -5.802±0.562 | 7.50E-03 |
| cg09282744 | 5 | 177580924 | GeneBody/5'UTR/1st exon   | <i>NHP2</i>     | -5.362±0.39  | -5.748±0.572 | 8.02E-05 |
| cg17587934 | 5 | 177631246 | TSS1500                   | <i>HNRNPAB</i>  | -5.413±0.336 | -5.764±0.546 | 6.59E-05 |
| cg10038259 | 5 | 177631514 | GeneBody/5'UTR/1st exon   | <i>HNRNPAB</i>  | -5.41±0.733  | -6.047±0.656 | 1.08E-04 |
| cg07051140 | 5 | 177659229 | GeneBody/1st intron       | <i>PHYKPL</i>   | -4.8±0.359   | -5.086±0.543 | 1.30E-03 |
| cg12766348 | 5 | 178054039 | GeneBody/5'UTR/1st exon   | <i>CLK4</i>     | -5.057±0.515 | -5.424±0.573 | 1.56E-03 |
| cg10224037 | 5 | 178157518 | GeneBody/5'UTR/1st intron | <i>ZNF354A</i>  | -5.501±0.494 | -5.909±0.633 | 4.82E-04 |
| cg21678388 | 5 | 178286735 | TSS1500                   | <i>ZNF354B</i>  | -3.877±0.594 | -4.293±0.561 | 1.33E-03 |
| cg11538128 | 5 | 178487481 | TSS200                    | <i>ZNF354C</i>  | -4.932±0.44  | -5.265±0.587 | 1.42E-03 |
| cg01593190 | 5 | 178772793 | TSS1500                   | <i>ADAMTS2</i>  | -4.08±0.383  | -4.38±0.497  | 9.07E-04 |
| cg03992230 | 5 | 179050530 | GeneBody/5'UTR/1st intron | <i>HNRNPH1</i>  | -3.921±0.223 | -4.075±0.359 | 6.21E-03 |
| cg19723775 | 5 | 179050963 | TSS1500                   | <i>HNRNPH1</i>  | -5.612±0.523 | -6.28±0.766  | 1.43E-06 |
| cg13859478 | 5 | 179126433 | GeneBody/5'UTR/1st intron | <i>CANX</i>     | -3.622±0.385 | -3.366±0.45  | 3.42E-03 |
| cg14446808 | 5 | 179233589 | GeneBody/5'UTR/1st exon   | <i>SQSTM1</i>   | -3.294±0.205 | -3.435±0.355 | 7.85E-03 |
| cg21929993 | 5 | 179498114 | GeneBody/1st intron       | <i>RNF130</i>   | -4.221±0.404 | -4.61±0.505  | 6.24E-05 |
| cg18602314 | 5 | 179780802 | TSS1500                   | <i>GFP2</i>     | -5.274±0.432 | -5.673±0.51  | 9.27E-05 |
| cg16585682 | 5 | 180017623 | GeneBody                  | <i>SCGB3A1</i>  | -3.947±0.256 | -4.276±0.471 | 5.98E-06 |
| cg13927251 | 5 | 180077359 | TSS1500                   | <i>FLT4</i>     | -2.897±0.487 | -3.182±0.357 | 4.85E-03 |
| cg20193716 | 5 | 180229067 | GeneBody/5'UTR/1st intron | <i>MGAT1</i>    | -3.945±0.401 | -4.295±0.479 | 1.97E-04 |
| cg03723845 | 5 | 180326186 | GeneBody/5'UTR/1st exon   | <i>BTNL8</i>    | 2.605±0.325  | 2.345±0.45   | 8.73E-04 |
| cg21850069 | 5 | 180649807 | TSS200                    | <i>MIR4638</i>  | -4.288±0.569 | -4.64±0.565  | 4.48E-03 |
| cg27285278 | 5 | 180650776 | GeneBody/5'UTR/1st exon   | <i>TRIM41</i>   | -4.814±0.656 | -5.41±0.64   | 7.06E-05 |
| cg11100802 | 5 | 180688063 | GeneBody/5'UTR/1st exon   | <i>TRIM52</i>   | -5.211±0.412 | -5.672±0.599 | 1.22E-05 |

|            |   |          |                           |              |              |              |          |
|------------|---|----------|---------------------------|--------------|--------------|--------------|----------|
| cg25140370 | 6 | 391114   | TSS1500                   | IRF4         | -3.86±0.346  | -4.104±0.415 | 2.07E-03 |
| cg12741420 | 6 | 392131   | GeneBody/5'UTR/1st intron | IRF4         | -4.075±0.291 | -4.27±0.453  | 6.98E-03 |
| cg04946916 | 6 | 656890   | GeneBody/1st exon         | HUS1B        | 4.201±0.339  | 4.477±0.466  | 7.32E-04 |
| cg03848675 | 6 | 1389146  | TSS1500                   | FOXF2        | -3.937±0.339 | -4.307±0.438 | 1.11E-05 |
| cg23867624 | 6 | 1610197  | TSS1500                   | FOXC1        | -5.905±0.603 | -6.348±0.654 | 1.09E-03 |
| cg16550324 | 6 | 2245327  | GeneBody/1st intron       | GMDS         | -5.179±0.596 | -5.692±0.62  | 1.63E-04 |
| cg08932320 | 6 | 2246077  | GeneBody/1st exon         | LOC100508120 | -5.128±0.4   | -5.412±0.53  | 2.50E-03 |
| cg05191792 | 6 | 2765113  | TSS1500                   | WRNIP1       | -5.267±0.472 | -5.784±0.625 | 1.12E-05 |
| cg18676237 | 6 | 2903258  | GeneBody/5'UTR/1st intron | SERPINB9     | -4.904±0.384 | -5.276±0.436 | 4.33E-05 |
| cg20185083 | 6 | 2904005  | TSS1500                   | SERPINB9     | 0.278±0.11   | 0.191±0.119  | 4.87E-04 |
| cg12044889 | 6 | 3000430  | GeneBody/5'UTR/1st intron | NQO2         | -4.79±0.324  | -5.092±0.418 | 1.10E-04 |
| cg00231644 | 6 | 3158512  | TSS1500                   | TUBB2A       | -1.657±0.477 | -1.088±0.597 | 2.32E-06 |
| cg25211525 | 6 | 3751739  | GeneBody/1st exon         | PXDC1        | -5.493±0.425 | -6.006±0.738 | 1.08E-05 |
| cg06786424 | 6 | 4021316  | TSS1500                   | PRPF4B       | -4.724±0.484 | -5.152±0.441 | 8.56E-05 |
| cg09439093 | 6 | 4135575  | GeneBody/5'UTR/1st intron | ECI2         | -5.005±0.469 | -5.403±0.419 | 1.40E-04 |
| cg15669273 | 6 | 5261406  | TSS200                    | FARS2        | -4.775±0.329 | -5.12±0.487  | 3.83E-05 |
| cg26165608 | 6 | 5261829  | GeneBody/5'UTR/1st exon   | FARS2        | -5.522±0.472 | -5.809±0.411 | 4.25E-03 |
| cg14047667 | 6 | 6320889  | GeneBody/5'UTR/1st exon   | F13A1        | -4.961±0.403 | -5.467±0.475 | 7.99E-07 |
| cg18533466 | 6 | 7107952  | GeneBody/5'UTR/1st exon   | RREB1        | -5.526±0.334 | -5.954±0.528 | 2.08E-06 |
| cg07936037 | 6 | 7313172  | GeneBody/1st intron       | SSR1         | -5.104±0.412 | -5.642±0.656 | 1.59E-06 |
| cg24520800 | 6 | 7389821  | GeneBody/5'UTR/1st exon   | CAGE1        | -5.373±0.599 | -6.041±0.558 | 3.16E-06 |
| cg27321931 | 6 | 7541442  | TSS1500                   | DSP          | -4.037±0.375 | -4.263±0.39  | 5.86E-03 |
| cg21068339 | 6 | 7542819  | GeneBody/1st intron       | DSP          | -5.288±0.47  | -5.583±0.538 | 5.19E-03 |
| cg07479491 | 6 | 7726108  | TSS1500                   | BMP6         | -4.133±0.494 | -4.424±0.462 | 6.04E-03 |
| cg00012792 | 6 | 8064493  | GeneBody/1st intron       | BLOC1S5      | -4.33±0.234  | -4.677±0.394 | 2.08E-07 |
| cg14439353 | 6 | 8102781  | GeneBody/1st exon         | EEF1E1-MUTED | -5.102±0.288 | -5.321±0.275 | 5.90E-04 |
| cg22572779 | 6 | 10434761 | GeneBody/1st exon         | LINC00518    | 1.535±0.255  | 1.694±0.258  | 4.20E-03 |
| cg06544198 | 6 | 10723702 | GeneBody/5'UTR/1st intron | TMEM14C      | -4.162±0.451 | -4.573±0.494 | 8.62E-05 |
| cg08552121 | 6 | 10748352 | GeneBody/5'UTR/1st intron | TMEM14B      | -4.147±0.337 | -4.514±0.427 | 1.03E-05 |
| cg11249173 | 6 | 11112209 | TSS200                    | ERVFRD-1     | 0.031±0.139  | 0.116±0.152  | 5.94E-03 |
| cg18226566 | 6 | 11232665 | GeneBody/1st intron       | NEDD9        | -3.386±0.302 | -3.161±0.318 | 9.16E-04 |
| cg01177524 | 6 | 11232933 | TSS200                    | NEDD9        | -4.939±0.283 | -5.164±0.304 | 4.72E-04 |
| cg07782113 | 6 | 12012564 | TSS200                    | HIVEP1       | -5.438±0.401 | -5.864±0.518 | 1.68E-05 |
| cg25559625 | 6 | 12290322 | TSS1500                   | EDN1         | -4.71±0.491  | -5.048±0.414 | 1.35E-03 |
| cg20376899 | 6 | 12290779 | GeneBody/5'UTR/1st exon   | EDN1         | -4.559±0.524 | -4.976±0.491 | 3.33E-04 |
| cg08946989 | 6 | 13328449 | GeneBody/5'UTR/1st intron | TBC1D7       | -6.098±0.587 | -6.55±0.611  | 6.01E-04 |
| cg26753137 | 6 | 13575449 | GeneBody/5'UTR/1st intron | SIRT5        | -3.909±0.495 | -4.196±0.456 | 6.79E-03 |
| cg16253168 | 6 | 13614902 | TSS1500                   | NOL7         | -4.913±0.375 | -5.354±0.475 | 3.04E-06 |
| cg06433995 | 6 | 13615570 | GeneBody/5'UTR/1st exon   | NOL7         | -5.163±0.371 | -5.44±0.459  | 1.29E-03 |
| cg23528708 | 6 | 13814945 | TSS200                    | MCUR1        | -4.034±0.234 | -4.356±0.382 | 7.14E-07 |
| cg01288598 | 6 | 14118227 | GeneBody                  | CD83         | -3.285±0.295 | -3.533±0.352 | 3.04E-04 |
| cg18719571 | 6 | 15664231 | TSS1500                   | DTNBP1       | 2.116±0.203  | 2.268±0.276  | 1.58E-03 |
| cg14298379 | 6 | 16128926 | TSS1500                   | MYLIP        | -4.471±0.248 | -4.771±0.368 | 3.83E-06 |
| cg19055458 | 6 | 16128933 | TSS1500                   | MYLIP        | -4.678±0.448 | -5.057±0.556 | 3.28E-04 |
| cg10487127 | 6 | 16761668 | GeneBody/5'UTR/1st exon   | ATXN1        | -5.122±0.389 | -5.481±0.513 | 1.36E-04 |
| cg04542938 | 6 | 16762468 | TSS1500                   | ATXN1        | -5.071±0.292 | -5.262±0.307 | 3.09E-03 |
| cg06682978 | 6 | 17394417 | GeneBody/5'UTR/1st intron | CAP2         | -5.669±0.484 | -6.159±0.642 | 3.87E-05 |
| cg08620270 | 6 | 17706868 | GeneBody/5'UTR/1st exon   | NUP153       | -5.284±0.546 | -5.611±0.528 | 5.66E-03 |
| cg14499797 | 6 | 21594038 | GeneBody/5'UTR/1st exon   | SOX4         | -3.097±0.168 | -3.232±0.31  | 2.75E-03 |
| cg13884546 | 6 | 24403062 | TSS200                    | MRS2         | -4.768±0.45  | -5.128±0.498 | 4.70E-04 |
| cg16917279 | 6 | 24403287 | GeneBody/1st exon         | MRS2         | -4.95±0.445  | -5.344±0.408 | 8.61E-05 |
| cg14023451 | 6 | 24489887 | TSS200                    | GPLD1        | 1.348±0.196  | 1.467±0.246  | 8.05E-03 |
| cg06171242 | 6 | 24667490 | GeneBody/5'UTR/1st exon   | ACOT13       | -4.297±0.296 | -4.572±0.387 | 1.23E-04 |
| cg11780382 | 6 | 24719812 | TSS1500                   | C6orf62      | -4.189±0.481 | -4.541±0.519 | 1.12E-03 |
| cg26331192 | 6 | 24775229 | GeneBody/5'UTR/1st exon   | GMNN         | -5.394±0.686 | -5.87±0.591  | 1.28E-03 |
| cg22532997 | 6 | 25279002 | TSS1500                   | LRRC16A      | -3.522±0.241 | -3.675±0.352 | 8.79E-03 |
| cg10146929 | 6 | 26017939 | GeneBody/1st exon         | HIST1H1A     | -1.479±0.351 | -1.768±0.388 | 3.36E-04 |
| cg08797106 | 6 | 26021008 | GeneBody/1st exon         | HIST1H3A     | -2.483±0.203 | -2.367±0.217 | 9.41E-03 |
| cg03969906 | 6 | 26021768 | TSS200                    | HIST1H4A     | -2.44±0.3    | -2.262±0.316 | 6.92E-03 |
| cg23099349 | 6 | 26032281 | GeneBody/1st exon         | HIST1H3B     | -4.318±0.316 | -4.593±0.404 | 2.59E-04 |
| cg15797414 | 6 | 26032407 | TSS200                    | HIST1H3B     | -4.157±0.549 | -4.57±0.546  | 7.12E-04 |
| cg22630160 | 6 | 26033475 | GeneBody/1st exon         | HIST1H2AB    | -4.148±0.425 | -4.47±0.436  | 7.00E-04 |
| cg19430897 | 6 | 26034145 | TSS1500                   | HIST1H2AB    | -2.359±0.17  | -2.481±0.237 | 2.74E-03 |
| cg06069731 | 6 | 26043791 | GeneBody/1st exon         | HIST1H2BB    | -4.188±0.409 | -4.455±0.387 | 2.60E-03 |
| cg07750111 | 6 | 26056168 | GeneBody/1st exon         | HIST1H1C     | -4.653±0.376 | -4.873±0.314 | 5.51E-03 |
| cg21453677 | 6 | 26056948 | TSS1500                   | HIST1H1C     | -4.665±0.662 | -5.035±0.529 | 7.54E-03 |
| cg06892726 | 6 | 26087607 | GeneBody/5'UTR/1st exon   | HFE          | -2.86±0.319  | -3.19±0.491  | 5.79E-05 |
| cg24453353 | 6 | 26104185 | GeneBody/1st exon         | HIST1H4C     | -4.938±0.373 | -5.246±0.391 | 2.68E-04 |
| cg10704923 | 6 | 26108404 | TSS200                    | HIST1H1T     | 4.307±0.372  | 4.632±0.312  | 9.03E-05 |
| cg03007571 | 6 | 26157673 | TSS1500                   | HIST1H2BD    | -3.731±0.366 | -4.067±0.402 | 8.10E-05 |
| cg08307092 | 6 | 26200174 | GeneBody/1st exon/3'UTR   | HIST1H2BF    | -4.164±0.363 | -4.384±0.476 | 9.34E-03 |
| cg05159188 | 6 | 26240579 | TSS200                    | HIST1H4F     | -3.384±0.29  | -3.615±0.342 | 5.55E-04 |
| cg23540745 | 6 | 26247133 | GeneBody/1st exon         | HIST1H4G     | 2.468±0.37   | 2.226±0.372  | 2.85E-03 |
| cg05414338 | 6 | 26250347 | 0                         | 0            | -4.284±0.319 | -4.48±0.427  | 8.77E-03 |
| cg06254453 | 6 | 26250350 | 0                         | 0            | -4.69±0.48   | -5.064±0.463 | 4.62E-04 |
| cg21663122 | 6 | 26250936 | TSS200                    | HIST1H3F     | -3.774±0.45  | -4.185±0.437 | 6.46E-05 |
| cg21729186 | 6 | 26285766 | TSS200                    | HIST1H4H     | -5.205±0.649 | -5.656±0.552 | 1.23E-03 |
| cg26314781 | 6 | 26365485 | GeneBody/5'UTR/1st exon   | BTN3A2       | -2.765±0.173 | -2.907±0.308 | 1.91E-03 |
| cg25881193 | 6 | 26383297 | TSS200                    | BTN2A2       | -3.019±0.167 | -3.227±0.273 | 4.38E-06 |
| cg16494590 | 6 | 26421791 | GeneBody/1st exon         | BTN2A3P      | -3.822±0.356 | -4.114±0.351 | 2.58E-04 |
| cg12455562 | 6 | 26422779 | GeneBody                  | BTN2A3P      | 1.514±0.285  | 1.301±0.251  | 6.10E-04 |
| cg01269795 | 6 | 26440101 | TSS1500                   | BTN3A3       | -1.492±0.171 | -1.614±0.267 | 4.23E-03 |
| cg17624892 | 6 | 26537952 | TSS1500                   | HMGN4        | -4.526±0.283 | -4.748±0.498 | 2.78E-03 |
| cg12256080 | 6 | 26597000 | TSS200                    | ABT1         | -4.353±0.324 | -4.562±0.399 | 4.83E-03 |
| cg27028749 | 6 | 26597531 | GeneBody/1st intron       | ABT1         | -4.961±0.562 | -5.294±0.506 | 5.60E-03 |
| cg03029060 | 6 | 27441036 | TSS200                    | ZNF184       | -4.661±0.225 | -4.863±0.252 | 1.18E-04 |
| cg10046620 | 6 | 27775042 | TSS1500                   | HIST1H2AI    | -3.223±0.283 | -3.398±0.299 | 4.99E-03 |
| cg17050972 | 6 | 27782197 | GeneBody/1st exon         | HIST1H2AJ    | -2.668±0.343 | -2.954±0.333 | 2.06E-04 |
| cg03833068 | 6 | 27804958 | TSS1500                   | HIST1H2BN    | -4.432±0.258 | -4.633±0.303 | 7.51E-04 |
| cg25885771 | 6 | 27806081 | GeneBody/1st exon         | HIST1H2AK    | -3.941±0.518 | -4.362±0.525 | 3.11E-04 |
| cg07129274 | 6 | 27832880 | TSS1500                   | HIST1H2AL    | -4.439±0.541 | -4.932±0.617 | 1.01E-04 |
| cg19435409 | 6 | 27833121 | GeneBody/5'UTR/1st exon   | HIST1H2AL    | -4.436±0.47  | -4.821±0.508 | 3.31E-04 |
| cg04676561 | 6 | 27835191 | GeneBody/1st exon         | HIST1H1B     | -3.721±0.314 | -4.014±0.357 | 7.35E-05 |
| cg22919370 | 6 | 27840212 | TSS200                    | HIST1H3I     | -3.656±0.362 | -3.888±0.512 | 7.38E-03 |
| cg17718302 | 6 | 27858637 | TSS200                    | HIST1H3J     | -4.489±0.407 | -4.795±0.533 | 1.41E-03 |

|            |   |          |                           |          |              |              |          |
|------------|---|----------|---------------------------|----------|--------------|--------------|----------|
| cg12706983 | 6 | 28092239 | TSS200                    | ZSCAN16  | -3.721±0.402 | -4.002±0.439 | 1.78E-03 |
| cg13665593 | 6 | 28092420 | GeneBody/5'UTR/1st exon   | ZSCAN16  | -5.694±0.676 | -6.167±0.548 | 1.08E-03 |
| cg00743372 | 6 | 28109648 | TSS200                    | ZKSCAN8  | -4.764±0.423 | -5.125±0.511 | 2.69E-04 |
| cg22950391 | 6 | 28109938 | TSS200                    | ZKSCAN8  | -4.962±0.368 | -5.211±0.561 | 5.89E-03 |
| cg24986572 | 6 | 28193283 | GeneBody/5'UTR/1st intron | ZSCAN9   | -5.102±0.498 | -5.538±0.454 | 1.02E-04 |
| cg26875522 | 6 | 28219796 | GeneBody/5'UTR/1st exon   | ZKSCAN4  | -4.893±0.373 | -5.179±0.339 | 4.79E-04 |
| cg12561748 | 6 | 28220091 | TSS200                    | ZKSCAN4  | -5.494±0.611 | -6.019±0.508 | 1.07E-04 |
| cg19217872 | 6 | 28234843 | GeneBody/5'UTR/1st exon   | ZSCAN26  | -3.657±0.252 | -3.487±0.34  | 4.31E-03 |
| cg05293407 | 6 | 28891967 | TSS200                    | TRIM27   | -4.306±0.352 | -4.597±0.322 | 2.05E-04 |
| cg01078434 | 6 | 29455532 | GeneBody/1st exon         | MAS1L    | 2.629±0.184  | 2.753±0.315  | 8.87E-03 |
| cg05661333 | 6 | 29600200 | GeneBody/5'UTR/1st intron | GABBR1   | -4.704±0.426 | -5.074±0.457 | 1.54E-04 |
| cg24847163 | 6 | 29600980 | TSS200                    | GABBR1   | -5.801±0.626 | -6.402±0.7   | 4.60E-05 |
| cg05598246 | 6 | 29624414 | TSS1500                   | MOG      | 0.261±0.257  | 0.443±0.301  | 1.91E-03 |
| cg14402472 | 6 | 29691165 | GeneBody/5'UTR/1st exon   | HLA-F    | -5.222±0.525 | -5.738±0.632 | 4.12E-05 |
| cg21529533 | 6 | 29796015 | GeneBody                  | HLA-G    | -4.034±0.416 | -4.369±0.553 | 7.29E-04 |
| cg04802801 | 6 | 30034711 | TSS1500                   | PPP1R11  | -4.353±0.206 | -4.597±0.237 | 1.93E-06 |
| cg14694232 | 6 | 30181448 | TSS200                    | TRIM26   | -4.651±0.419 | -5.15±0.507  | 2.07E-06 |
| cg13135180 | 6 | 30312972 | GeneBody/1st exon         | RPP21    | -4.765±0.289 | -4.968±0.31  | 1.67E-03 |
| cg21264055 | 6 | 30523242 | TSS1500                   | PRR3     | -2.644±0.307 | -2.847±0.416 | 5.21E-03 |
| cg18015044 | 6 | 30538844 | TSS1500                   | ABCF1    | -3.874±0.514 | -4.216±0.51  | 2.38E-03 |
| cg26884376 | 6 | 30539453 | GeneBody/1st intron       | ABCF1    | -4.93±0.7    | -5.522±0.699 | 1.84E-04 |
| cg13964084 | 6 | 30594709 | GeneBody/5'UTR/1st exon   | ATAT1    | -4.996±0.259 | -5.254±0.493 | 3.22E-04 |
| cg13118748 | 6 | 30614722 | TSS200                    | C6orf136 | -4.767±0.293 | -4.977±0.329 | 1.50E-03 |
| cg23938476 | 6 | 30615339 | GeneBody/1st exon         | C6orf136 | -5.349±0.408 | -5.668±0.462 | 6.03E-04 |
| cg24450157 | 6 | 30640543 | GeneBody/1st intron       | DXH16    | -4.49±0.407  | -4.807±0.624 | 1.71E-03 |
| cg10277195 | 6 | 30684931 | GeneBody/5'UTR/1st intron | MDC1     | -5.014±0.38  | -5.31±0.316  | 3.55E-04 |
| cg26259575 | 6 | 30687946 | TSS1500                   | TUBB     | -5.131±0.31  | -5.455±0.499 | 6.17E-05 |
| cg01944444 | 6 | 30688681 | GeneBody/1st intron       | TUBB     | -4.51±0.445  | -4.806±0.407 | 2.05E-03 |
| cg24000189 | 6 | 30710425 | GeneBody/5'UTR/1st exon   | FLOT1    | -5.356±0.556 | -5.678±0.571 | 7.99E-03 |
| cg11977634 | 6 | 30852699 | TSS200                    | DDR1     | -4.083±0.227 | -4.431±0.385 | 1.10E-07 |
| cg23142900 | 6 | 30875883 | TSS200                    | GTTF2H4  | -5.209±0.441 | -5.594±0.575 | 2.72E-04 |
| cg09508556 | 6 | 31106982 | GeneBody/5'UTR/1st exon   | PSORS1C2 | 1.936±0.321  | 2.17±0.365   | 1.29E-03 |
| cg16097079 | 6 | 31239916 | TSS200                    | HLA-C    | -3.7±0.526   | -4.229±0.618 | 2.72E-05 |
| cg17554194 | 6 | 31324972 | GeneBody/5'UTR/1st exon   | HLA-B    | -3.768±0.992 | -4.468±1.038 | 1.51E-03 |
| cg17489752 | 6 | 31509945 | GeneBody/5'UTR/1st exon   | DDX39B   | -4.474±0.413 | -4.813±0.483 | 4.06E-04 |
| cg04136480 | 6 | 31510196 | GeneBody/5'UTR/1st exon   | DDX39B   | -4.74±0.334  | -4.965±0.33  | 2.07E-03 |
| cg26991292 | 6 | 31515091 | TSS1500                   | NFKBIL1  | -3.387±0.347 | -3.637±0.384 | 1.37E-03 |
| cg00585846 | 6 | 31515458 | GeneBody/5'UTR/1st exon   | NFKBIL1  | -4.087±0.241 | -4.371±0.372 | 7.40E-06 |
| cg21440587 | 6 | 31583458 | TSS1500                   | AIF1     | -2.085±0.194 | -2.303±0.293 | 1.48E-05 |
| cg04762213 | 6 | 31587888 | TSS1500                   | PRRC2A   | -3.384±0.888 | -3.979±0.727 | 1.65E-03 |
| cg27091233 | 6 | 31620917 | TSS1500                   | BAG6     | -5.165±0.415 | -5.57±0.532  | 5.70E-05 |
| cg09867157 | 6 | 31620935 | TSS1500                   | BAG6     | -4.993±0.457 | -5.408±0.467 | 7.66E-05 |
| cg14341418 | 6 | 31624284 | GeneBody                  | APOM     | 3.202±0.224  | 3.325±0.201  | 9.57E-03 |
| cg15100639 | 6 | 31671037 | GeneBody/1st exon         | ABHD16A  | -5.023±0.507 | -5.501±0.482 | 4.03E-05 |
| cg00746130 | 6 | 31671271 | TSS200                    | ABHD16A  | -4.054±0.637 | -4.634±0.714 | 9.53E-05 |
| cg27557796 | 6 | 31688702 | GeneBody/1st intron       | LY6G6C   | 1.494±0.228  | 1.671±0.265  | 7.68E-04 |
| cg02257681 | 6 | 31698002 | GeneBody/5'UTR/1st exon   | DDAH2    | -4.254±0.679 | -5.117±0.776 | 6.13E-07 |
| cg00728602 | 6 | 31744927 | GeneBody/5'UTR/1st exon   | VWA7     | -4.626±0.402 | -4.992±0.479 | 1.15E-04 |
| cg01505176 | 6 | 31763310 | GeneBody/5'UTR/1st intron | VARS     | -5.652±0.61  | -6.268±0.662 | 2.04E-05 |
| cg13653456 | 6 | 31763819 | TSS200                    | VARS     | -3.782±0.315 | -4.132±0.648 | 1.31E-04 |
| cg27573806 | 6 | 31774911 | TSS200                    | LSM2     | -4.329±0.391 | -4.804±0.556 | 2.85E-06 |
| cg05920090 | 6 | 31782873 | TSS200                    | HSPA1L   | -4.227±0.378 | -4.614±0.46  | 2.38E-05 |
| cg14663792 | 6 | 31802922 | TSS200                    | SNORD48  | -4.26±0.316  | -4.625±0.441 | 6.32E-06 |
| cg13510327 | 6 | 31830729 | TSS200                    | NEU1     | -4.628±0.311 | -4.986±0.48  | 1.10E-05 |
| cg04498679 | 6 | 31895598 | GeneBody/1st intron       | C2       | -0.867±0.21  | -1.003±0.248 | 4.38E-03 |
| cg17741572 | 6 | 31914305 | GeneBody                  | CFB      | 1.37±0.433   | 1.71±0.451   | 4.84E-04 |
| cg01883966 | 6 | 31938886 | TSS200                    | STK19    | 3.027±0.301  | 3.234±0.312  | 1.87E-03 |
| cg24870273 | 6 | 31938891 | TSS200                    | STK19    | 1.569±0.257  | 1.799±0.278  | 1.12E-04 |
| cg10265786 | 6 | 31940028 | GeneBody/5'UTR/1st exon   | DOM3Z    | -5.252±0.293 | -5.508±0.486 | 7.32E-04 |
| cg20284673 | 6 | 31940167 | TSS200                    | DOM3Z    | -1.843±0.12  | -1.958±0.188 | 1.72E-04 |
| cg03479797 | 6 | 32096154 | TSS200                    | ATF6B    | -4.263±0.438 | -4.595±0.43  | 6.52E-04 |
| cg05069385 | 6 | 32098247 | TSS200                    | FKBP1    | -4.877±0.434 | -5.32±0.469  | 1.66E-05 |
| cg13910855 | 6 | 32157485 | GeneBody/1st exon         | PBX2     | -4.421±0.349 | -4.722±0.466 | 3.34E-04 |
| cg08183114 | 6 | 32158284 | TSS1500                   | PBX2     | -4.295±0.48  | -4.689±0.441 | 2.27E-04 |
| cg26791659 | 6 | 32163054 | GeneBody/5'UTR/1st intron | GPSM3    | -3.6±0.378   | -3.851±0.48  | 4.02E-03 |
| cg08592230 | 6 | 32163562 | TSS1500                   | GPSM3    | -5.015±0.366 | -5.259±0.365 | 2.39E-03 |
| cg04345908 | 6 | 32731327 | GeneBody/5'UTR/1st exon   | HLA-DQB2 | 2.163±0.273  | 2.355±0.34   | 2.40E-03 |
| cg19221044 | 6 | 32806167 | GeneBody/5'UTR/1st intron | TAP2     | -4.129±0.272 | -4.388±0.419 | 1.82E-04 |
| cg14493899 | 6 | 32807733 | TSS1500                   | TAP2     | 3.09±0.211   | 3.224±0.213  | 3.62E-03 |
| cg15451100 | 6 | 32812422 | GeneBody/5'UTR/1st exon   | PSMB8    | -5.28±0.483  | -5.622±0.608 | 2.21E-03 |
| cg12762680 | 6 | 32822346 | GeneBody/1st intron       | PSMB9    | -4.296±0.586 | -4.703±0.61  | 1.75E-03 |
| cg16853860 | 6 | 32823116 | GeneBody/1st intron       | PSMB9    | 0.267±0.275  | 0.101±0.322  | 7.31E-03 |
| cg14833385 | 6 | 32921142 | TSS1500                   | HLA-DMA  | -6.64±0.449  | -4.924±0.388 | 3.00E-03 |
| cg10211788 | 6 | 32936073 | TSS1500                   | BRD2     | -5.6±0.59    | -6.212±0.592 | 1.11E-05 |
| cg01909833 | 6 | 32937267 | GeneBody/5'UTR/1st intron | BRD2     | -4.345±0.569 | -4.68±0.517  | 5.88E-03 |
| cg26643856 | 6 | 32977349 | GeneBody/5'UTR/1st exon   | HLA-DOA  | -4.271±0.285 | -4.582±0.4   | 1.60E-05 |
| cg19921353 | 6 | 33043574 | TSS200                    | HLA-DPB1 | -3.423±0.317 | -3.629±0.356 | 3.89E-03 |
| cg23070585 | 6 | 33168452 | GeneBody/5'UTR/1st exon   | RXRβ     | -6.308±0.604 | -6.714±0.557 | 1.90E-03 |
| cg07433344 | 6 | 33172450 | GeneBody/1st exon         | HSD17B8  | -5.858±0.553 | -6.374±0.647 | 7.69E-05 |
| cg27331144 | 6 | 33175688 | GeneBody/1st exon         | MIR219-1 | -5.437±0.464 | -5.882±0.522 | 4.68E-05 |
| cg18189601 | 6 | 33176225 | TSS200                    | RING1    | -2.952±0.419 | -3.278±0.577 | 1.19E-03 |
| cg14363494 | 6 | 33176234 | TSS200                    | RING1    | -4.188±0.329 | -4.436±0.622 | 5.48E-03 |
| cg12256228 | 6 | 33176613 | GeneBody                  | RING1    | -4.85±0.375  | -5.053±0.315 | 9.90E-03 |
| cg10301967 | 6 | 33240022 | GeneBody/1st intron       | RPS18    | -4.742±0.274 | -4.909±0.313 | 6.56E-03 |
| cg13576739 | 6 | 33257501 | GeneBody/5'UTR/1st exon   | PFDN6    | -4.519±0.312 | -4.696±0.27  | 7.27E-03 |
| cg02990567 | 6 | 33266961 | GeneBody/5'UTR/1st exon   | RGL2     | -4.76±0.421  | -5.053±0.594 | 3.73E-03 |
| cg26315802 | 6 | 33281972 | GeneBody/5'UTR/1st exon   | TAPBP    | -3.027±0.145 | -3.153±0.262 | 1.13E-03 |
| cg06975739 | 6 | 33282158 | GeneBody/5'UTR/1st exon   | TAPBP    | -2.315±0.429 | -2.69±0.642  | 4.76E-04 |
| cg07689821 | 6 | 33290736 | GeneBody/5'UTR/1st exon   | DAXX     | -3.965±0.493 | -4.298±0.523 | 2.30E-03 |
| cg13303256 | 6 | 33378019 | TSS1500                   | PHF1     | -5.056±0.382 | -5.304±0.399 | 3.25E-03 |
| cg06818415 | 6 | 33379267 | GeneBody/1st intron       | PHF1     | -4.325±0.581 | -4.927±0.569 | 1.04E-05 |
| cg26974738 | 6 | 33386261 | TSS200                    | CUTA     | -4.321±0.248 | -4.54±0.244  | 1.06E-04 |
| cg09892131 | 6 | 33422028 | TSS1500                   | ZBTB9    | -4.248±0.284 | -4.458±0.23  | 5.99E-04 |
| cg16400825 | 6 | 33589418 | GeneBody/1st exon         | ITPR3    | -4.525±0.277 | -4.81±0.398  | 4.30E-05 |
| cg11406695 | 6 | 33679379 | GeneBody/1st exon         | MNF1     | -4.886±0.669 | -5.373±0.607 | 8.38E-04 |

|             |   |          |                           |          |              |              |          |
|-------------|---|----------|---------------------------|----------|--------------|--------------|----------|
| cg25922239  | 6 | 33757077 | TSS200                    | LEMD2    | -5.293±0.594 | -5.905±0.661 | 1.56E-05 |
| cg03020951  | 6 | 34203887 | TSS1500                   | HMGA1    | -3.15±0.302  | -3.359±0.405 | 3.30E-03 |
| cg06247172  | 6 | 34216481 | GeneBody/5'UTR/1st intron | C6orf1   | -4.967±0.372 | -5.274±0.52  | 6.45E-04 |
| cg11061603  | 6 | 34393330 | GeneBody/5'UTR/1st intron | RPS10    | -4.848±0.324 | -5.157±0.434 | 9.32E-05 |
| cg11655418  | 6 | 34394031 | TSS200                    | RPS10    | -4.475±0.488 | -4.796±0.428 | 2.15E-03 |
| cg117043922 | 6 | 34664305 | GeneBody/1st exon         | C6orf106 | -2.1±0.239   | -2.465±0.347 | 4.22E-08 |
| cg15676488  | 6 | 34725116 | GeneBody/5'UTR/1st exon   | SNRPC    | -3.955±0.428 | -4.302±0.517 | 5.07E-04 |
| cg04506628  | 6 | 34725359 | GeneBody/1st intron       | SNRPC    | -3.973±0.417 | -4.367±0.616 | 1.60E-04 |
| cg14142521  | 6 | 34855408 | GeneBody/1st intron       | TAF11    | -3.96±0.409  | -4.332±0.51  | 1.30E-04 |
| cg13510363  | 6 | 34857281 | GeneBody/1st exon         | ANKS1A   | -4.526±0.44  | -4.817±0.427 | 2.38E-03 |
| cg011108476 | 6 | 35109383 | TSS200                    | TCP11    | 3.377±0.266  | 3.626±0.348  | 1.09E-04 |
| cg00347904  | 6 | 35182508 | GeneBody/1st intron       | SCUBE3   | -2.93±0.536  | -3.262±0.529 | 4.44E-03 |
| cg17803089  | 6 | 35419793 | TSS1500                   | FANCE    | -4.521±0.44  | -4.77±0.431  | 8.95E-03 |
| cg00862770  | 6 | 35655764 | GeneBody/5'UTR/1st intron | FKBP5    | -4.996±0.435 | -5.424±0.66  | 1.07E-04 |
| cg09082921  | 6 | 35744226 | TSS200                    | CLPSL2   | -2.428±0.349 | -2.657±0.403 | 3.59E-03 |
| cg01693108  | 6 | 35888298 | GeneBody                  | SRPK1    | -4.916±0.441 | -5.304±0.445 | 1.12E-04 |
| cg25324046  | 6 | 35889059 | TSS200                    | SRPK1    | -4.666±0.248 | -5.085±0.444 | 1.96E-08 |
| cg02412050  | 6 | 35995429 | TSS200                    | MAPK14   | -4.12±0.151  | -4.222±0.267 | 9.58E-03 |
| cg04286043  | 6 | 36410500 | TSS200                    | KCTD20   | -4.388±0.353 | -4.737±0.466 | 5.28E-05 |
| cg241170535 | 6 | 36410553 | GeneBody/5'UTR/1st exon   | KCTD20   | -4.237±0.298 | -4.563±0.436 | 1.83E-05 |
| cg08027745  | 6 | 36561726 | TSS1500                   | SRSF3    | -4.638±0.582 | -5.092±0.617 | 5.45E-04 |
| cg27394038  | 6 | 36562217 | GeneBody/1st exon         | SRSF3    | -5.012±0.371 | -5.308±0.356 | 3.52E-04 |
| cg01306510  | 6 | 36646540 | GeneBody/5'UTR/1st exon   | CDKN1A   | -5.532±0.59  | -5.966±0.588 | 9.04E-04 |
| cg21222430  | 6 | 36647664 | GeneBody/5'UTR/1st intron | CDKN1A   | -4.23±0.361  | -4.512±0.523 | 1.38E-03 |
| cg08179530  | 6 | 36648295 | GeneBody/5'UTR/1st intron | CDKN1A   | -5.379±0.68  | -5.892±0.659 | 6.53E-04 |
| cg18237405  | 6 | 36807982 | TSS1500                   | CPNE5    | -4.638±0.438 | -4.9±0.382   | 5.05E-03 |
| cg15591837  | 6 | 36842614 | GeneBody/5'UTR/1st exon   | PPIL1    | -5.15±0.374  | -5.55±0.492  | 1.62E-05 |
| cg26222229  | 6 | 36842844 | TSS200                    | PPIL1    | -4.476±0.279 | -4.719±0.269 | 1.19E-04 |
| cg20598389  | 6 | 36854046 | GeneBody/1st intron       | C6orf89  | -3.309±0.41  | -3.559±0.489 | 7.08E-03 |
| cg00734993  | 6 | 36953694 | GeneBody/1st exon         | MTCH1    | -4.706±0.492 | -5.049±0.489 | 1.52E-03 |
| cg16239406  | 6 | 36954249 | GeneBody/5'UTR/1st exon   | MTCH1    | -5.699±0.54  | -6.068±0.479 | 1.55E-03 |
| cg21769943  | 6 | 37137738 | TSS200                    | PIM1     | -4.981±0.505 | -5.375±0.556 | 5.95E-04 |
| cg12667808  | 6 | 37401352 | GeneBody/5'UTR/1st intron | FTSJD2   | -5.854±0.511 | -6.226±0.456 | 8.34E-04 |
| cg14204992  | 6 | 37787312 | GeneBody/5'UTR/1st exon   | ZFAND3   | -5.688±0.708 | -6.137±0.511 | 2.41E-03 |
| cg24822446  | 6 | 37788018 | GeneBody/1st intron       | ZFAND3   | -5.133±0.326 | -5.368±0.325 | 1.12E-03 |
| cg26824091  | 6 | 38670437 | GeneBody/1st intron       | GLO1     | -4.211±0.402 | -4.619±0.502 | 3.01E-05 |
| cg26916927  | 6 | 38671019 | TSS200                    | GLO1     | -4.708±0.327 | -4.98±0.271  | 1.57E-04 |
| cg09867835  | 6 | 39016262 | TSS1500                   | GLP1R    | -2.585±0.173 | -2.69±0.217  | 7.77E-03 |
| cg08851943  | 6 | 39082812 | GeneBody/1st exon         | SAYS1    | -4.857±0.32  | -5.09±0.349  | 1.21E-03 |
| cg26287783  | 6 | 39083072 | TSS1500                   | SAYS1    | -4.402±0.346 | -4.735±0.387 | 4.57E-05 |
| cg18191162  | 6 | 39693228 | TSS200                    | KIF6     | -4.207±0.247 | -4.357±0.275 | 6.41E-03 |
| cg22346765  | 6 | 41007522 | TSS1500                   | UNC5CL   | 1.532±0.263  | 1.693±0.263  | 4.71E-03 |
| cg22788223  | 6 | 41040659 | TSS200                    | NFYA     | -5.451±0.557 | -5.831±0.57  | 1.97E-03 |
| cg01564343  | 6 | 41121920 | GeneBody/1st intron       | TREML1   | 0.848±0.15   | 0.959±0.189  | 1.45E-03 |
| cg03442064  | 6 | 41155050 | GeneBody/5'UTR/1st intron | FOXP4    | -2.13±0.129  | -2.308±0.258 | 3.46E-06 |
| cg03446863  | 6 | 41702426 | TSS1500                   | TFEB     | -3.508±0.248 | -3.685±0.317 | 2.19E-03 |
| cg17391877  | 6 | 41714182 | GeneBody/1st intron       | PGC      | 2.072±0.242  | 2.22±0.269   | 6.13E-03 |
| cg06381133  | 6 | 41747367 | GeneBody/5'UTR/1st intron | FRS3     | -4.252±0.324 | -4.665±0.372 | 6.16E-07 |
| cg07967643  | 6 | 41747785 | TSS200                    | FRS3     | -5.022±0.4   | -5.317±0.368 | 7.70E-04 |
| cg20991095  | 6 | 41863098 | GeneBody/5'UTR/1st exon   | USP49    | -5.389±0.498 | -5.797±0.554 | 3.58E-04 |
| cg27563210  | 6 | 41863441 | TSS1500                   | USP49    | -4.582±0.626 | -5.077±0.64  | 4.30E-04 |
| cg17767659  | 6 | 41888922 | TSS200                    | BYSL     | -4.379±0.325 | -4.659±0.481 | 5.01E-04 |
| cg08011328  | 6 | 41889049 | GeneBody/5'UTR/1st exon   | BYSL     | -4.935±0.4   | -5.191±0.339 | 2.68E-03 |
| cg25658178  | 6 | 41909862 | TSS1500                   | CCND3    | -4.584±0.509 | -5.048±0.527 | 7.66E-05 |
| cg19839588  | 6 | 42419466 | GeneBody/5'UTR/1st intron | TRERF1   | -4.129±0.202 | -4.249±0.23  | 7.66E-03 |
| cg07191600  | 6 | 42421243 | TSS1500                   | TRERF1   | -5.43±0.359  | -5.782±0.488 | 6.86E-05 |
| cg19448829  | 6 | 42531521 | TSS1500                   | UBR2     | -4.972±0.539 | -5.459±0.593 | 1.02E-04 |
| cg00893987  | 6 | 42847415 | TSS1500                   | RPL7L1   | -4.898±0.413 | -5.132±0.429 | 9.58E-03 |
| cg22909962  | 6 | 42847910 | GeneBody/1st intron       | RPL7L1   | -4.925±0.276 | -5.103±0.289 | 3.39E-03 |
| cg20681975  | 6 | 42897059 | GeneBody/5'UTR/1st exon   | CNPY3    | -4.772±0.283 | -5.095±0.55  | 5.94E-05 |
| cg03790207  | 6 | 42947109 | TSS200                    | PEX6     | -5.523±0.498 | -5.813±0.467 | 6.72E-03 |
| cg22004151  | 6 | 42952586 | GeneBody/1st intron       | PPP2R5D  | -4.573±0.362 | -4.789±0.372 | 6.31E-03 |
| cg13397365  | 6 | 42981894 | GeneBody/5'UTR/1st exon   | KLHDC3   | -5.008±0.416 | -5.316±0.615 | 2.37E-03 |
| cg08747889  | 6 | 43043786 | TSS1500                   | PTK7     | -4.356±0.36  | -4.789±0.49  | 2.79E-06 |
| cg22232206  | 6 | 43138185 | TSS1500                   | SRF      | -3.846±0.43  | -4.118±0.55  | 6.15E-03 |
| cg12940430  | 6 | 43138965 | GeneBody/5'UTR/1st exon   | SRF      | -4.277±0.491 | -4.8±0.506   | 8.01E-06 |
| cg19595170  | 6 | 43139150 | GeneBody/5'UTR/1st exon   | SRF      | -4.202±0.496 | -4.669±0.736 | 1.67E-04 |
| cg14839932  | 6 | 43139162 | GeneBody/5'UTR/1st exon   | SRF      | -2.883±0.309 | -3.112±0.572 | 5.83E-03 |
| cg02760007  | 6 | 43139670 | GeneBody/1st exon         | SRF      | -3.668±0.448 | -4.025±0.561 | 6.76E-04 |
| cg17166101  | 6 | 43150130 | GeneBody/5'UTR/1st intron | CUL9     | -4.177±0.186 | -4.285±0.188 | 7.77E-03 |
| cg18878034  | 6 | 43197151 | GeneBody/1st exon         | DNPH1    | -5.414±0.611 | -5.99±0.642  | 4.88E-05 |
| cg13260333  | 6 | 43197365 | TSS200                    | DNPH1    | -3.623±0.486 | -3.934±0.537 | 4.11E-03 |
| cg24922992  | 6 | 43265547 | TSS1500                   | SLC22A7  | -0.311±0.178 | -0.192±0.195 | 2.70E-03 |
| cg11928635  | 6 | 43337708 | TSS1500                   | ZNF318   | -4.853±0.331 | -5.161±0.481 | 1.77E-04 |
| cg24908499  | 6 | 43423540 | GeneBody/5'UTR/1st intron | DLK2     | -3.958±0.266 | -4.282±0.4   | 3.77E-06 |
| cg19506903  | 6 | 43484373 | GeneBody/1st intron       | YIPF3    | -4.902±0.472 | -5.306±0.463 | 1.49E-04 |
| cg07857181  | 6 | 43543548 | GeneBody/1st exon         | XPO5     | -4.585±0.384 | -4.871±0.463 | 1.22E-03 |
| cg06132324  | 6 | 43544046 | GeneBody/5'UTR/1st exon   | POLH     | -4.417±0.244 | -4.614±0.425 | 2.05E-03 |
| cg14465910  | 6 | 43596764 | GeneBody/1st exon         | GTPBP2   | -4.58±0.408  | -4.91±0.428  | 3.62E-04 |
| cg23377693  | 6 | 43597122 | TSS200                    | MAD2L1BP | -4.249±0.276 | -4.564±0.402 | 9.19E-06 |
| cg25824330  | 6 | 43655393 | GeneBody/1st intron       | MRPS18A  | -5.566±0.519 | -5.977±0.485 | 3.62E-04 |
| cg11806749  | 6 | 45345490 | GeneBody/5'UTR/1st intron | SUPT3H   | -4.098±0.238 | -4.37±0.358  | 1.05E-05 |
| cg21548414  | 6 | 45983585 | GeneBody/5'UTR/1st exon   | CLIC5    | -5.494±0.504 | -5.91±0.472  | 2.17E-04 |
| cg04006554  | 6 | 46138530 | GeneBody/5'UTR/1st intron | ENPP5    | -5.233±0.511 | -5.663±0.584 | 2.76E-04 |
| cg19799744  | 6 | 46138963 | TSS1500                   | ENPP5    | -4.18±0.357  | -4.439±0.462 | 1.88E-03 |
| cg11574612  | 6 | 46620502 | GeneBody/5'UTR/1st exon   | CYP39A1  | -4.158±0.201 | -4.324±0.229 | 3.41E-04 |
| cg19557537  | 6 | 46620673 | GeneBody/5'UTR/1st exon   | SLC25A27 | -4.761±0.297 | -5.172±0.438 | 3.52E-07 |
| cg17021265  | 6 | 47445121 | TSS1500                   | CD2AP    | -3.475±0.337 | -3.281±0.327 | 7.51E-03 |
| cg10568944  | 6 | 49430788 | GeneBody/5'UTR/1st intron | MUT      | -3.703±0.342 | -4.026±0.363 | 5.06E-05 |
| cg25786862  | 6 | 49431288 | GeneBody/5'UTR/1st intron | CENPQ    | -4.012±0.449 | -4.431±0.448 | 5.01E-05 |
| cg05829479  | 6 | 49518079 | TSS200                    | C6orf141 | -2.214±0.49  | -1.893±0.5   | 2.84E-03 |
| cg06403553  | 6 | 49754848 | GeneBody/1st exon         | PGK2     | 2.369±0.256  | 2.526±0.242  | 4.47E-03 |
| cg15435730  | 6 | 50680222 | TSS1500                   | TFAP2D   | -3.838±0.284 | -4.034±0.403 | 4.05E-03 |
| cg25226247  | 6 | 50785152 | TSS1500                   | TFAP2B   | -1.961±0.363 | -2.181±0.378 | 5.85E-03 |
| cg18885346  | 6 | 51953114 | TSS1500                   | PKHD1    | 1.772±0.459  | 1.508±0.49   | 8.83E-03 |

|            |   |           |                           |              |              |              |          |
|------------|---|-----------|---------------------------|--------------|--------------|--------------|----------|
| cg14961550 | 6 | 52149751  | TSS200                    | MCM3         | -3.539±0.176 | -3.707±0.313 | 3.83E-04 |
| cg24323031 | 6 | 52227260  | GeneBody/5'UTR/1st intron | PAQR8        | -3.896±0.399 | -4.213±0.429 | 4.71E-04 |
| cg17648620 | 6 | 52284686  | TSS1500                   | EFHC1        | -3.735±0.266 | -4.016±0.38  | 2.73E-05 |
| cg22248011 | 6 | 52442381  | GeneBody/1st exon         | TRAM2-AS1    | -5.106±0.341 | -5.508±0.475 | 4.43E-06 |
| cg25923856 | 6 | 52536059  | GeneBody/5'UTR/1st intron | TMEM14A      | -4.28±0.206  | -4.436±0.27  | 1.35E-03 |
| cg00162401 | 6 | 52859823  | GeneBody/5'UTR/1st intron | GSTA4        | -4.622±0.416 | -4.918±0.473 | 1.70E-03 |
| cg20967220 | 6 | 53013647  | TSS200                    | GCM1         | 1.668±0.236  | 1.811±0.259  | 6.33E-03 |
| cg00024396 | 6 | 53214008  | TSS200                    | ELOVL5       | -4.731±0.458 | -5.001±0.423 | 5.86E-03 |
| cg21908116 | 6 | 53659077  | TSS1500                   | LRRC1        | -5.631±0.429 | -6.013±0.365 | 7.04E-05 |
| cg27090087 | 6 | 54172378  | TSS1500                   | TINAG        | -0.107±0.204 | -0.233±0.247 | 6.74E-03 |
| cg05157725 | 6 | 56112484  | TSS200                    | COL21A1      | -2.249±0.294 | -1.95±0.392  | 3.87E-05 |
| cg21829265 | 6 | 56911139  | TSS1500                   | KIAA1586     | -4.216±0.362 | -4.514±0.553 | 9.51E-04 |
| cg16475089 | 6 | 56911617  | GeneBody/1st intron       | KIAA1586     | -6.133±0.535 | -6.527±0.588 | 1.11E-03 |
| cg24373308 | 6 | 57036955  | TSS200                    | BAG2         | -5.062±0.58  | -5.588±0.689 | 1.20E-04 |
| cg22984616 | 6 | 57037535  | GeneBody/1st exon         | BAG2         | -5.519±0.605 | -6.046±0.624 | 1.36E-04 |
| cg10497569 | 6 | 57087038  | GeneBody/5'UTR/1st exon   | RAB23        | -4.956±0.356 | -5.211±0.291 | 8.52E-04 |
| cg26430450 | 6 | 57087242  | TSS200                    | RAB23        | -4.692±0.311 | -4.998±0.401 | 5.05E-05 |
| cg16001460 | 6 | 57181802  | TSS1500                   | PRIM2        | -3.409±0.395 | -3.779±0.566 | 1.54E-04 |
| cg27293353 | 6 | 57182516  | GeneBody/5'UTR/1st intron | PRIM2        | -5.495±0.623 | -5.941±0.55  | 9.82E-04 |
| cg24500683 | 6 | 64281771  | TSS200                    | PTP4A1       | -3.231±0.253 | -3.397±0.313 | 4.15E-03 |
| cg09747829 | 6 | 69348055  | GeneBody/5'UTR            | BAI3         | -3.304±0.571 | -3.718±0.554 | 1.01E-03 |
| cg04598744 | 6 | 70506758  | GeneBody/1st exon         | LMBRD1       | -6.019±0.597 | -6.369±0.503 | 5.50E-03 |
| cg10796979 | 6 | 70506998  | GeneBody/5'UTR/1st exon   | LMBRD1       | -5.096±0.38  | -5.618±0.449 | 1.39E-07 |
| cg06321883 | 6 | 70576541  | GeneBody/5'UTR/1st intron | COL19A1      | -3.291±0.257 | -3.436±0.253 | 8.68E-03 |
| cg22716127 | 6 | 71377855  | GeneBody/1st intron       | SMAP1        | -5.56±0.451  | -5.857±0.596 | 4.97E-03 |
| cg23429696 | 6 | 71665936  | GeneBody/1st exon         | B3GAT2       | -6.091±0.595 | -6.679±0.682 | 3.22E-05 |
| cg15717808 | 6 | 73331652  | GeneBody/5'UTR/1st exon   | KCNQ5        | -5.302±0.333 | -5.631±0.451 | 5.82E-05 |
| cg09527362 | 6 | 74162142  | TSS200                    | MB21D1       | -3.724±0.453 | -4.057±0.52  | 1.26E-03 |
| cg26201579 | 6 | 74171602  | GeneBody/1st exon         | MTO1         | -4.985±0.37  | -5.374±0.541 | 3.50E-05 |
| cg01454004 | 6 | 74363018  | GeneBody/1st intron       | SLC17A5      | -4.02±0.607  | -4.592±0.526 | 3.39E-05 |
| cg00648153 | 6 | 74364149  | TSS1500                   | SLC17A5      | -4.127±0.416 | -4.45±0.496  | 7.81E-04 |
| cg23442323 | 6 | 74406189  | GeneBody/1st intron       | CD109        | -3.747±0.309 | -4.036±0.378 | 8.62E-05 |
| cg08009622 | 6 | 75916327  | TSS1500                   | COL12A1      | -4.101±0.317 | -4.361±0.403 | 5.25E-04 |
| cg10541994 | 6 | 75994262  | GeneBody/1st exon         | TMEM30A      | -5.469±0.391 | -5.818±0.485 | 1.61E-04 |
| cg26174387 | 6 | 75994825  | GeneBody/1st exon         | LOC100506804 | -3.935±0.411 | -4.289±0.465 | 1.95E-04 |
| cg08222514 | 6 | 76312378  | GeneBody/1st intron       | SENP6        | -3.125±0.509 | -3.531±0.651 | 7.26E-04 |
| cg04555836 | 6 | 76458633  | TSS1500                   | MYO6         | -3.292±0.187 | -3.486±0.291 | 5.83E-05 |
| cg17055145 | 6 | 76459077  | GeneBody/5'UTR/1st exon   | MYO6         | -5.443±0.58  | -5.938±0.62  | 1.92E-04 |
| cg06848288 | 6 | 79788573  | TSS1500                   | PHIP         | -4.895±0.408 | -5.125±0.371 | 8.13E-03 |
| cg22058458 | 6 | 79944186  | GeneBody/1st intron       | HMGN3        | -5.704±0.632 | -6.089±0.563 | 4.23E-03 |
| cg11654737 | 6 | 80816077  | TSS1500                   | BCKDHB       | -3.515±0.395 | -3.762±0.457 | 5.41E-03 |
| cg15627524 | 6 | 83777986  | GeneBody/5'UTR/1st intron | DOPEY1       | -3.267±0.678 | -3.689±0.588 | 3.44E-03 |
| cg15185804 | 6 | 83902498  | GeneBody/5'UTR/1st intron | PGM3         | -3.645±0.33  | -3.982±0.42  | 2.97E-05 |
| cg24204740 | 6 | 83903813  | TSS200                    | PGM3         | -4.392±0.303 | -4.658±0.334 | 1.45E-04 |
| cg15269863 | 6 | 84222360  | GeneBody/5'UTR/1st exon   | PRSS35       | -2.628±0.2   | -2.776±0.286 | 2.22E-03 |
| cg26130726 | 6 | 84569839  | GeneBody/1st intron       | CYB5R4       | -4.006±0.588 | -4.418±0.523 | 1.22E-03 |
| cg11763112 | 6 | 84937277  | GeneBody/5'UTR/1st intron | KIAA1009     | -4.902±0.447 | -5.249±0.478 | 5.88E-04 |
| cg22264946 | 6 | 84937441  | TSS200                    | KIAA1009     | -5.913±0.506 | -6.387±0.525 | 5.32E-05 |
| cg17488985 | 6 | 86159426  | GeneBody/5'UTR/1st exon   | NT5E         | -4.026±0.34  | -4.299±0.439 | 6.86E-04 |
| cg09404334 | 6 | 86304180  | TSS1500                   | SNX14        | -4.018±0.304 | -4.25±0.336  | 7.87E-04 |
| cg04278702 | 6 | 87647399  | GeneBody/5'UTR/1st exon   | HTR1E        | -3.559±0.391 | -3.838±0.538 | 2.78E-03 |
| cg25302370 | 6 | 88117530  | TSS200                    | C6orf165     | -3.493±0.509 | -3.79±0.496  | 7.05E-03 |
| cg26132665 | 6 | 88118362  | GeneBody/5'UTR/1st intron | C6orf165     | -4.46±0.5    | -4.82±0.422  | 8.59E-04 |
| cg17341703 | 6 | 88182369  | TSS1500                   | SLC35A1      | -4.239±0.425 | -4.488±0.364 | 5.65E-03 |
| cg10919329 | 6 | 88182879  | GeneBody/1st intron       | SLC35A1      | -4.826±0.358 | -5.137±0.541 | 4.92E-04 |
| cg06598631 | 6 | 88300029  | GeneBody/1st intron       | ORC3         | -4.72±0.268  | -4.898±0.274 | 2.57E-03 |
| cg02486845 | 6 | 88411799  | GeneBody/5'UTR/1st exon   | AKIRIN2      | -3.993±0.27  | -4.278±0.53  | 1.90E-04 |
| cg03786772 | 6 | 88412400  | TSS1500                   | AKIRIN2      | -3.666±0.448 | -4.053±0.501 | 1.86E-04 |
| cg14076411 | 6 | 89673710  | TSS1500                   | RNGTT        | -4.378±0.468 | -4.708±0.549 | 1.93E-03 |
| cg06913228 | 6 | 90062465  | GeneBody/5'UTR/1st exon   | UBE2J1       | -5.849±0.675 | -6.358±0.567 | 5.25E-04 |
| cg16124337 | 6 | 90062879  | TSS1500                   | UBE2J1       | -4.312±0.291 | -4.49±0.335  | 6.35E-03 |
| cg19635869 | 6 | 90121153  | GeneBody/1st intron       | RRAGD        | -4.094±0.257 | -4.292±0.388 | 1.83E-03 |
| cg16900022 | 6 | 90529294  | GeneBody/1st exon         | MDN1         | -5.637±0.526 | -6.028±0.514 | 7.78E-04 |
| cg07914959 | 6 | 91006321  | GeneBody/5'UTR/1st exon   | BACH2        | -5.145±0.554 | -5.549±0.579 | 1.08E-03 |
| cg18654873 | 6 | 91296666  | GeneBody/5'UTR/1st exon   | MAP3K7       | -6.057±0.52  | -6.465±0.577 | 5.64E-04 |
| cg08001895 | 6 | 94129582  | TSS1500                   | EPHA7        | -4.419±0.376 | -4.725±0.503 | 6.62E-04 |
| cg20884697 | 6 | 96025221  | TSS200                    | MANEA        | -4.439±0.337 | -4.779±0.414 | 3.07E-05 |
| cg15832292 | 6 | 96025679  | GeneBody/5'UTR/1st intron | MANEA        | -5.033±0.61  | -5.544±0.516 | 1.51E-04 |
| cg16298282 | 6 | 96969423  | TSS1500                   | UFL1         | -3.331±0.519 | -3.876±0.529 | 9.52E-06 |
| cg11787828 | 6 | 97345624  | GeneBody/1st exon         | NDUFAF4      | -4.068±0.34  | -3.823±0.432 | 1.94E-03 |
| cg16823105 | 6 | 97372572  | GeneBody/5'UTR/1st exon   | KLHL32       | -3.996±0.269 | -4.238±0.366 | 2.08E-04 |
| cg23858074 | 6 | 97730720  | GeneBody/5'UTR/1st intron | MMS22L       | -5.392±0.374 | -5.623±0.34  | 3.86E-03 |
| cg03108701 | 6 | 97731400  | TSS1500                   | MMS22L       | -4.405±0.432 | -4.653±0.391 | 7.03E-03 |
| cg23269225 | 6 | 99395318  | GeneBody/5'UTR/1st intron | FBXL4        | -5.489±0.499 | -5.821±0.565 | 3.13E-03 |
| cg16665103 | 6 | 99841605  | GeneBody/1st intron       | COQ3         | -3.729±0.457 | -4.121±0.448 | 1.47E-04 |
| cg04520084 | 6 | 100016357 | GeneBody/5'UTR/1st intron | CCNC         | -4.878±0.424 | -5.261±0.486 | 1.10E-04 |
| cg06667091 | 6 | 100017988 | TSS1500                   | CCNC         | 1.231±0.292  | 0.959±0.435  | 1.96E-04 |
| cg03664139 | 6 | 101329504 | TSS1500                   | ASCC3        | -5.636±0.461 | -6.124±0.62  | 2.13E-05 |
| cg16009558 | 6 | 101846707 | TSS200                    | GRIK2        | -3.249±0.346 | -3.571±0.49  | 1.57E-04 |
| cg23047681 | 6 | 105307907 | TSS200                    | HACE1        | -4.966±0.45  | -5.231±0.494 | 7.96E-03 |
| cg05874450 | 6 | 105627246 | GeneBody/5'UTR/1st intron | POPDC3       | -3.808±0.226 | -3.947±0.321 | 9.98E-03 |
| cg20612615 | 6 | 105850408 | GeneBody/1st intron       | PREP         | -4.705±0.303 | -5.071±0.459 | 4.59E-06 |
| cg06218044 | 6 | 105851256 | TSS1500                   | PREP         | -4.538±0.286 | -4.919±0.438 | 8.49E-07 |
| cg17965230 | 6 | 106534206 | GeneBody/5'UTR/1st exon   | PRDM1        | -5.306±0.355 | -5.598±0.492 | 6.55E-04 |
| cg16950012 | 6 | 106773140 | GeneBody/5'UTR/1st intron | ATG5         | -5.158±0.376 | -5.428±0.325 | 9.34E-04 |
| cg25263140 | 6 | 106959651 | TSS200                    | AIM1         | -4.652±0.373 | -4.975±0.349 | 1.19E-04 |
| cg04145477 | 6 | 107077629 | GeneBody/1st intron       | QRS1         | -5.173±0.412 | -5.627±0.476 | 6.29E-06 |
| cg04464559 | 6 | 107780641 | GeneBody/5'UTR/1st exon   | PDSS2        | -4.99±0.448  | -5.474±0.557 | 1.07E-05 |
| cg05642698 | 6 | 108278844 | GeneBody/1st intron       | SEC63        | -5.138±0.548 | -5.507±0.547 | 2.10E-03 |
| cg01320361 | 6 | 108279781 | TSS1500                   | SEC63        | -4.679±0.371 | -5.102±0.478 | 5.24E-06 |
| cg04650786 | 6 | 108395545 | GeneBody/1st exon         | OSTM1        | -4.776±0.367 | -4.976±0.293 | 9.09E-03 |
| cg02504465 | 6 | 108582065 | GeneBody/1st exon         | SNX3         | -5.2±0.457   | -5.721±0.648 | 8.30E-06 |
| cg00180012 | 6 | 108615929 | TSS200                    | LACE1        | -4.312±0.39  | -4.546±0.452 | 7.45E-03 |
| cg02060698 | 6 | 108881455 | GeneBody/5'UTR/1st intron | FOXO3        | -6.176±0.571 | -6.504±0.509 | 7.05E-03 |
| cg12785675 | 6 | 109169698 | GeneBody/5'UTR/1st exon   | ARMC2        | -4.073±0.186 | -4.252±0.348 | 4.32E-04 |

|            |   |           |                           |                 |              |              |          |
|------------|---|-----------|---------------------------|-----------------|--------------|--------------|----------|
| cg11541187 | 6 | 109415607 | GeneBody/5'UTR/1st exon   | <i>SESN1</i>    | -4.565±0.366 | -5.035±0.458 | 6.52E-07 |
| cg08550724 | 6 | 109450991 | GeneBody/5'UTR/1st intron | <i>CEP57L1</i>  | 2.466±0.336  | 2.656±0.277  | 7.30E-03 |
| cg01932459 | 6 | 109703513 | GeneBody/1st exon         | <i>CD164</i>    | -6.709±0.494 | -7.17±0.753  | 2.19E-04 |
| cg23832061 | 6 | 109761667 | TSS1500                   | <i>SMPD2</i>    | -5.857±0.468 | -6.303±0.486 | 4.23E-05 |
| cg03976567 | 6 | 110012095 | GeneBody/5'UTR/1st intron | <i>AK9</i>      | -4.126±0.235 | -4.465±0.336 | 1.30E-07 |
| cg05715287 | 6 | 110501610 | TSS200                    | <i>CDC40</i>    | -3.895±0.363 | -4.212±0.328 | 9.96E-05 |
| cg18697049 | 6 | 111136368 | GeneBody/5'UTR/1st exon   | <i>CDK19</i>    | -5.524±0.555 | -5.911±0.483 | 1.22E-03 |
| cg23235603 | 6 | 111136979 | TSS1500                   | <i>CDK19</i>    | -4.749±0.374 | -5.122±0.492 | 4.57E-05 |
| cg04128563 | 6 | 111195434 | TSS1500                   | <i>AMD1</i>     | -5.421±0.549 | -5.875±0.559 | 2.54E-04 |
| cg00115714 | 6 | 111196112 | GeneBody/5'UTR/1st exon   | <i>AMD1</i>     | -3.842±0.542 | -4.228±0.565 | 1.38E-03 |
| cg07940485 | 6 | 111409222 | GeneBody/1st exon         | <i>SLC16A10</i> | -5.699±0.645 | -6.33±0.641  | 2.58E-05 |
| cg07352586 | 6 | 111580316 | TSS200                    | <i>KIAA1919</i> | -5.721±0.436 | -6.026±0.474 | 1.83E-03 |
| cg19318326 | 6 | 111580704 | GeneBody/5'UTR/1st exon   | <i>KIAA1919</i> | -5.348±0.435 | -5.602±0.399 | 6.38E-03 |
| cg19118533 | 6 | 111927323 | GeneBody/5'UTR/1st exon   | <i>TRAF3IP2</i> | -3.839±0.323 | -4.067±0.417 | 2.47E-03 |
| cg23076086 | 6 | 112194849 | TSS200                    | <i>FYN</i>      | -4.352±0.411 | -4.741±0.519 | 8.17E-05 |
| cg09384159 | 6 | 112408580 | TSS200                    | <i>FAM229B</i>  | -5.558±0.642 | -5.914±0.517 | 7.99E-03 |
| cg05668720 | 6 | 112408820 | TSS200                    | <i>TUBE1</i>    | -5.132±0.412 | -5.572±0.45  | 8.59E-06 |
| cg09816912 | 6 | 114178507 | TSS200                    | <i>MARCKS</i>   | -4.807±0.45  | -5.086±0.41  | 3.84E-03 |
| cg18387216 | 6 | 114291911 | TSS200                    | <i>HDAC2</i>    | -5.421±0.496 | -5.742±0.643 | 5.42E-03 |
| cg00436301 | 6 | 116421736 | TSS1500                   | <i>NT5DC1</i>   | -4.688±0.265 | -5.025±0.453 | 4.15E-06 |
| cg03959219 | 6 | 116575135 | GeneBody/1st exon         | <i>TSPYL4</i>   | -4.21±0.301  | -4.44±0.283  | 5.71E-04 |
| cg15056247 | 6 | 116601073 | GeneBody/5'UTR/1st exon   | <i>TSPYL1</i>   | -5.106±0.532 | -5.529±0.604 | 5.31E-04 |
| cg13980473 | 6 | 116601312 | GeneBody/5'UTR/1st exon   | <i>DSE</i>      | -4.311±0.73  | -4.745±0.553 | 4.40E-03 |
| cg24386906 | 6 | 116692844 | GeneBody/5'UTR/1st intron | <i>DSE</i>      | -4.588±0.468 | -4.924±0.463 | 1.12E-03 |
| cg00620629 | 6 | 116989951 | GeneBody/5'UTR/1st exon   | <i>ZUFSP</i>    | -5.198±0.495 | -5.563±0.606 | 1.41E-03 |
| cg16127900 | 6 | 117150495 | TSS1500                   | <i>GPRC6A</i>   | -1.112±0.262 | -1.288±0.378 | 5.60E-03 |
| cg25423576 | 6 | 117197952 | TSS1500                   | <i>RFX6</i>     | -3.723±0.369 | -4.009±0.498 | 1.15E-03 |
| cg21166999 | 6 | 117746793 | GeneBody/1st exon         | <i>ROS1</i>     | 0.977±0.204  | 1.12±0.204   | 3.19E-03 |
| cg26205432 | 6 | 118869571 | GeneBody/5'UTR/1st intron | <i>PLN</i>      | 0.989±0.291  | 1.164±0.298  | 7.99E-03 |
| cg13112336 | 6 | 119255874 | GeneBody/5'UTR/1st intron | <i>MCM9</i>     | -3.647±0.142 | -3.764±0.186 | 5.76E-04 |
| cg23348028 | 6 | 119670743 | GeneBody/5'UTR/1st exon   | <i>MAN1A1</i>   | -4.493±0.372 | -4.735±0.542 | 7.09E-03 |
| cg12657853 | 6 | 122720929 | GeneBody/1st exon         | <i>HSF2</i>     | -4.799±0.304 | -5.241±0.491 | 2.13E-07 |
| cg20882852 | 6 | 122792503 | GeneBody/1st intron       | <i>SERINC1</i>  | -4.64±0.434  | -4.883±0.385 | 8.20E-03 |
| cg18555555 | 6 | 123099534 | TSS1500                   | <i>FABP7</i>    | 4.982±0.459  | 5.372±0.338  | 1.08E-04 |
| cg22401066 | 6 | 123110741 | GeneBody/1st intron       | <i>SMPDL3A</i>  | -4.336±0.324 | -4.556±0.506 | 6.23E-03 |
| cg09657265 | 6 | 123110763 | GeneBody/1st intron       | <i>SMPDL3A</i>  | -5.433±0.433 | -5.733±0.561 | 3.04E-03 |
| cg19478478 | 6 | 123957927 | GeneBody/5'UTR/1st exon   | <i>TRDN</i>     | 0.993±0.31   | 1.173±0.354  | 9.41E-03 |
| cg14462830 | 6 | 123959184 | TSS1500                   | <i>TRDN</i>     | 1.195±0.251  | 1.027±0.298  | 3.23E-03 |
| cg21972430 | 6 | 125475126 | GeneBody/1st intron       | <i>TPD52L1</i>  | -5.159±0.376 | -5.43±0.464  | 1.78E-03 |
| cg08923450 | 6 | 126070151 | TSS1500                   | <i>HEY2</i>     | -4.057±0.325 | -4.245±0.303 | 7.03E-03 |
| cg25013058 | 6 | 126102409 | GeneBody/5'UTR/1st exon   | <i>NCOA7</i>    | -4.641±0.563 | -5.113±0.479 | 1.53E-04 |
| cg07240721 | 6 | 126278255 | GeneBody/1st exon         | <i>HINT3</i>    | -3.942±0.278 | -4.267±0.452 | 1.14E-05 |
| cg03059528 | 6 | 127587721 | TSS200                    | <i>RNF146</i>   | -4.457±0.339 | -4.739±0.455 | 5.33E-04 |
| cg22019980 | 6 | 127588823 | GeneBody/5'UTR/1st intron | <i>RNF146</i>   | -4.557±0.611 | -5.023±0.508 | 4.45E-04 |
| cg14911472 | 6 | 131949010 | GeneBody/1st intron       | <i>MED23</i>    | -4.431±0.348 | -4.648±0.324 | 3.82E-03 |
| cg03277112 | 6 | 131949711 | TSS1500                   | <i>MED23</i>    | -4.33±0.43   | -4.664±0.428 | 5.09E-04 |
| cg05417985 | 6 | 132128945 | TSS1500                   | <i>ENPP1</i>    | -5.781±0.281 | -6.067±0.461 | 9.99E-05 |
| cg17682309 | 6 | 132834573 | TSS1500                   | <i>STX7</i>     | -4.952±0.6   | -5.425±0.485 | 3.00E-04 |
| cg15582891 | 6 | 132967028 | GeneBody/1st exon         | <i>TAAR1</i>    | 0.376±0.269  | 0.563±0.293  | 1.90E-03 |
| cg24692716 | 6 | 133119484 | GeneBody/1st intron       | <i>SLC18B1</i>  | -5.024±0.455 | -5.452±0.583 | 9.39E-05 |
| cg26146086 | 6 | 133135242 | TSS1500                   | <i>RPS12</i>    | -4.72±0.35   | -5.121±0.464 | 5.70E-06 |
| cg07327468 | 6 | 133561765 | TSS1500                   | <i>EYA4</i>     | -2.264±0.229 | -2.422±0.34  | 4.69E-03 |
| cg20330472 | 6 | 133561932 | TSS1500                   | <i>EYA4</i>     | -3.637±0.314 | -3.882±0.428 | 1.10E-03 |
| cg20286200 | 6 | 133562267 | TSS1500                   | <i>EYA4</i>     | -3.116±0.25  | -2.939±0.3   | 1.98E-03 |
| cg01401376 | 6 | 133563342 | GeneBody/5'UTR/1st intron | <i>EYA4</i>     | -4.595±0.386 | -4.85±0.436  | 3.31E-03 |
| cg13878093 | 6 | 134274457 | GeneBody/5'UTR/1st exon   | <i>TBPL1</i>    | -5.194±0.627 | -5.809±0.58  | 2.19E-05 |
| cg26008464 | 6 | 134373624 | GeneBody/5'UTR/1st exon   | <i>SLC2A12</i>  | -5.031±0.383 | -5.528±0.502 | 6.63E-07 |
| cg09872934 | 6 | 134495829 | GeneBody/1st intron       | <i>SGK1</i>     | -4.309±0.58  | -4.92±0.636  | 1.09E-05 |
| cg03340261 | 6 | 135375900 | GeneBody/5'UTR/1st exon   | <i>HBS1L</i>    | -5.219±0.376 | -5.52±0.393  | 3.99E-04 |
| cg12721546 | 6 | 136611096 | TSS200                    | <i>BCLAF1</i>   | -5.551±0.578 | -6.055±0.444 | 8.12E-05 |
| cg10459515 | 6 | 136611098 | TSS200                    | <i>BCLAF1</i>   | -5.593±0.418 | -5.968±0.555 | 2.03E-04 |
| cg20481343 | 6 | 136871089 | GeneBody/1st intron       | <i>MAP7</i>     | -4.236±0.347 | -4.458±0.469 | 6.55E-03 |
| cg13255096 | 6 | 137112939 | GeneBody/1st exon         | <i>MAP3K5</i>   | -4.603±0.386 | -4.917±0.631 | 1.44E-03 |
| cg11310692 | 6 | 137143636 | TSS200                    | <i>PEX7</i>     | -4.6±0.447   | -4.957±0.508 | 5.01E-04 |
| cg12729059 | 6 | 137540499 | GeneBody/5'UTR/1st exon   | <i>IFNGR1</i>   | -5.445±0.434 | -5.699±0.49  | 8.75E-03 |
| cg03889226 | 6 | 137815333 | GeneBody/5'UTR/1st exon   | <i>OLIG3</i>    | -3.5±0.303   | -3.758±0.377 | 3.08E-04 |
| cg06779945 | 6 | 138188320 | TSS200                    | <i>TNFAIP3</i>  | -5.117±0.301 | -5.379±0.545 | 1.14E-03 |
| cg14527802 | 6 | 138188823 | GeneBody/5'UTR/1st intron | <i>TNFAIP3</i>  | -4.305±0.481 | -4.592±0.561 | 8.18E-03 |
| cg22762180 | 6 | 138428894 | TSS1500                   | <i>PERP</i>     | -4.267±0.284 | -4.442±0.287 | 4.72E-03 |
| cg06334093 | 6 | 139094587 | TSS200                    | <i>CCDC28A</i>  | -4.977±0.451 | -5.239±0.416 | 6.73E-03 |
| cg27199523 | 6 | 139094722 | GeneBody/5'UTR/1st exon   | <i>CCDC28A</i>  | -5.907±0.558 | -6.245±0.494 | 4.56E-03 |
| cg12341414 | 6 | 139309683 | TSS1500                   | <i>REPS1</i>    | -5.25±0.585  | -5.619±0.533 | 3.33E-03 |
| cg11498188 | 6 | 139456038 | TSS1500                   | <i>HECA</i>     | -4.519±0.4   | -4.827±0.357 | 4.50E-04 |
| cg25722142 | 6 | 139695762 | GeneBody/5'UTR/1st exon   | <i>CITED2</i>   | -1.918±0.139 | -2.038±0.201 | 4.48E-04 |
| cg12082568 | 6 | 139696378 | TSS1500                   | <i>CITED2</i>   | -4.169±0.242 | -4.415±0.404 | 1.16E-04 |
| cg15185286 | 6 | 143381675 | TSS1500                   | <i>AIG1</i>     | -5.519±0.678 | -6.001±0.622 | 1.10E-03 |
| cg27534796 | 6 | 143382067 | GeneBody/1st exon         | <i>AIG1</i>     | -4.689±0.486 | -5.03±0.408  | 1.11E-03 |
| cg08286169 | 6 | 143771981 | GeneBody/5'UTR/1st exon   | <i>PEX3</i>     | -5.006±0.582 | -5.355±0.551 | 5.46E-03 |
| cg21684385 | 6 | 143772210 | GeneBody/1st exon         | <i>PEX3</i>     | -4.898±0.39  | -5.267±0.489 | 8.15E-05 |
| cg18540871 | 6 | 143832937 | GeneBody/5'UTR/1st exon   | <i>FUCA2</i>    | -5.014±0.647 | -5.408±0.628 | 5.04E-03 |
| cg07077459 | 6 | 144329052 | GeneBody/5'UTR/1st intron | <i>PLAGL1</i>   | 0.952±0.114  | 1.06±0.145   | 7.60E-05 |
| cg22378065 | 6 | 144329172 | GeneBody/5'UTR/1st intron | <i>PLAGL1</i>   | 0.743±0.092  | 0.871±0.13   | 2.29E-07 |
| cg00702231 | 6 | 144329473 | GeneBody/5'UTR/1st exon   | <i>PLAGL1</i>   | 1.108±0.14   | 1.2±0.178    | 4.30E-03 |
| cg17895149 | 6 | 144329829 | GeneBody/1st exon         | <i>HYMAI</i>    | 0.638±0.181  | 0.771±0.206  | 1.28E-03 |
| cg07755653 | 6 | 144471198 | TSS1500                   | <i>STX11</i>    | -5.522±0.569 | -5.921±0.487 | 1.14E-03 |
| cg11070941 | 6 | 144471985 | GeneBody/5'UTR/1st intron | <i>STX11</i>    | -5.123±0.61  | -5.518±0.55  | 2.55E-03 |
| cg01362183 | 6 | 149639693 | GeneBody/5'UTR/1st intron | <i>TAB2</i>     | -3.538±0.229 | -3.728±0.341 | 8.42E-04 |
| cg25513133 | 6 | 149887296 | TSS1500                   | <i>GINM1</i>    | -4.684±0.335 | -4.922±0.47  | 2.99E-03 |
| cg27310686 | 6 | 149888373 | GeneBody/1st intron       | <i>GINM1</i>    | -4.63±0.321  | -5.04±0.533  | 3.04E-06 |
| cg24994350 | 6 | 150038700 | GeneBody/5'UTR/1st intron | <i>LATS1</i>    | -4.213±0.414 | -4.551±0.632 | 1.05E-03 |
| cg11408517 | 6 | 150039536 | TSS200                    | <i>LATS1</i>    | -4.452±0.373 | -4.805±0.529 | 1.29E-04 |
| cg25124223 | 6 | 150067614 | GeneBody/1st exon         | <i>NUP43</i>    | -5.749±0.534 | -6.08±0.498  | 4.03E-03 |
| cg26675382 | 6 | 150067846 | TSS200                    | <i>NUP43</i>    | -2.253±0.338 | -2.52±0.339  | 4.17E-04 |
| cg18418460 | 6 | 150390014 | GeneBody/1st intron       | <i>ULBP3</i>    | -5.888±0.678 | -6.579±0.625 | 1.19E-05 |
| cg14884741 | 6 | 150464644 | GeneBody/1st intron       | <i>PPP1R14C</i> | -3.363±0.302 | -3.073±0.416 | 9.49E-05 |

|            |   |           |                           |                  |              |              |          |
|------------|---|-----------|---------------------------|------------------|--------------|--------------|----------|
| cg00655307 | 6 | 152128743 | TSS200                    | <i>ESR1</i>      | -3.726±0.274 | -4.054±0.425 | 6.11E-06 |
| cg02720618 | 6 | 152129791 | GeneBody/1st intron       | <i>ESR1</i>      | -3.814±0.518 | -4.157±0.688 | 4.82E-03 |
| cg12290002 | 6 | 153304188 | GeneBody/5'UTR/1st exon   | <i>FBXO5</i>     | -5.357±0.351 | -5.643±0.336 | 2.69E-04 |
| cg07535879 | 6 | 153323363 | GeneBody/1st intron       | <i>MTRF1L</i>    | -4.832±0.574 | -5.144±0.483 | 9.89E-03 |
| cg23651356 | 6 | 153452954 | TSS1500                   | <i>RGS17</i>     | -0.849±0.232 | -0.678±0.216 | 7.71E-04 |
| cg10601168 | 6 | 154831192 | GeneBody/1st intron       | <i>CNKSR3</i>    | -4.366±0.468 | -4.77±0.397  | 1.05E-04 |
| cg12471156 | 6 | 155054259 | TSS1500                   | <i>SCAF8</i>     | -5.596±0.363 | -5.918±0.415 | 1.42E-04 |
| cg09837169 | 6 | 155410740 | TSS1500                   | <i>TIAM2</i>     | 2.807±0.256  | 2.985±0.289  | 2.02E-03 |
| cg22432367 | 6 | 157098650 | TSS1500                   | <i>ARID1B</i>    | -3.942±0.281 | -4.216±0.498 | 2.84E-04 |
| cg00502442 | 6 | 157801893 | TSS1500                   | <i>ZDHHC14</i>   | -5.104±0.397 | -5.528±0.548 | 2.06E-05 |
| cg09221326 | 6 | 159065141 | GeneBody/1st intron       | <i>DYNLT1</i>    | -4.664±0.398 | -5.081±0.493 | 1.77E-05 |
| cg04185037 | 6 | 159239164 | GeneBody/1st intron       | <i>EZR-AS1</i>   | -4.641±0.416 | -5.112±0.573 | 8.33E-06 |
| cg21366535 | 6 | 159421281 | TSS200                    | <i>RSPH3</i>     | -2.615±0.223 | -2.482±0.267 | 8.76E-03 |
| cg14515483 | 6 | 160113813 | GeneBody                  | <i>SOD2</i>      | -5.238±0.453 | -5.603±0.608 | 7.58E-04 |
| cg24909975 | 6 | 160147912 | TSS200                    | <i>WTAP</i>      | -5.308±0.474 | -5.604±0.509 | 4.90E-03 |
| cg15298323 | 6 | 160182438 | TSS1500                   | <i>ACAT2</i>     | -0.268±0.285 | 0.052±0.456  | 2.03E-05 |
| cg05879334 | 6 | 160183160 | GeneBody/1st exon         | <i>ACAT2</i>     | -6.237±0.606 | -6.74±0.584  | 2.15E-04 |
| cg08142684 | 6 | 160209868 | GeneBody/1st intron       | <i>TCP1</i>      | -4.516±0.569 | -4.972±0.542 | 3.20E-04 |
| cg04749401 | 6 | 160209903 | GeneBody/1st intron       | <i>TCP1</i>      | -5.385±0.518 | -5.723±0.506 | 2.75E-03 |
| cg25282410 | 6 | 160211355 | TSS200                    | <i>MRPL18</i>    | -3.544±0.765 | -3.969±0.716 | 9.45E-03 |
| cg14556618 | 6 | 160390829 | GeneBody/1st intron       | <i>IGF2R</i>     | -5.667±0.571 | -6.099±0.522 | 5.77E-04 |
| cg09339301 | 6 | 163836245 | GeneBody/1st exon         | <i>QKI</i>       | -4.557±0.445 | -4.94±0.492  | 1.87E-04 |
| cg14947494 | 6 | 166796284 | GeneBody/1st intron       | <i>MPC1</i>      | -5.123±0.607 | -5.472±0.534 | 6.78E-03 |
| cg17391474 | 6 | 166796744 | TSS1500                   | <i>MPC1</i>      | -5.027±0.592 | -5.399±0.575 | 3.84E-03 |
| cg22182975 | 6 | 167571172 | GeneBody/1st exon         | <i>GPR31</i>     | 2.8±0.199    | 3.007±0.312  | 5.79E-05 |
| cg21652958 | 6 | 169653961 | GeneBody/5'UTR            | <i>THBS2</i>     | -3.525±0.337 | -3.739±0.414 | 5.56E-03 |
| cg16740543 | 6 | 170123723 | GeneBody/1st intron       | <i>PHF10</i>     | -5.268±0.349 | -5.539±0.391 | 6.62E-04 |
| cg22267176 | 6 | 170152116 | GeneBody/1st intron       | <i>C6orf70</i>   | -5.507±0.508 | -5.869±0.514 | 1.28E-03 |
| cg10865119 | 6 | 170190112 | TSS200                    | <i>LINC00574</i> | -3.594±0.275 | -3.813±0.286 | 4.18E-04 |
| cg13891659 | 6 | 170190454 | GeneBody/1st exon         | <i>LINC00574</i> | -4.724±0.53  | -5.111±0.516 | 9.39E-04 |
| cg00474209 | 6 | 170600060 | TSS1500                   | <i>DLL1</i>      | -3.493±0.267 | -3.696±0.4   | 1.98E-03 |
| cg01956781 | 6 | 170615920 | GeneBody/5'UTR/1st exon   | <i>FAM120B</i>   | -6.705±0.894 | -7.433±0.701 | 1.93E-04 |
| cg06893980 | 6 | 170862231 | GeneBody/1st exon         | <i>PSMB1</i>     | -4.923±0.384 | -5.338±0.445 | 8.54E-06 |
| cg23350446 | 6 | 170893182 | GeneBody                  | <i>PDCD2</i>     | -3.875±0.252 | -4.051±0.273 | 1.81E-03 |
| cg18651821 | 6 | 170894141 | TSS1500                   | <i>PDCD2</i>     | -5.028±0.391 | -5.252±0.398 | 8.54E-03 |
| cg15914863 | 7 | 1022675   | TSS200                    | <i>CYP2W1</i>    | 1.069±0.197  | 1.243±0.295  | 4.12E-04 |
| cg17547792 | 7 | 1126723   | GeneBody/5'UTR/1st exon   | <i>GPER</i>      | -5.152±0.431 | -5.687±0.541 | 1.18E-06 |
| cg01497501 | 7 | 1200135   | TSS1500                   | <i>ZFAND2A</i>   | -5.954±0.505 | -6.535±0.62  | 3.89E-06 |
| cg03167339 | 7 | 1498866   | GeneBody/1st exon         | <i>MICALL2</i>   | -4.57±0.408  | -4.835±0.529 | 5.30E-03 |
| cg01820777 | 7 | 1499734   | TSS1500                   | <i>MICALL2</i>   | -3.784±0.269 | -4.076±0.395 | 2.14E-05 |
| cg10857807 | 7 | 2272392   | GeneBody/5'UTR/1st intron | <i>MAD1L1</i>    | -5.653±0.618 | -6.358±0.71  | 3.54E-06 |
| cg21166555 | 7 | 2272904   | TSS1500                   | <i>MAD1L1</i>    | -4.539±0.425 | -5.054±0.497 | 1.42E-06 |
| cg01813334 | 7 | 2394150   | TSS1500                   | <i>EIF3B</i>     | -4.081±0.27  | -4.272±0.26  | 1.23E-03 |
| cg25533361 | 7 | 2395147   | GeneBody/1st intron       | <i>EIF3B</i>     | -4.242±0.492 | -4.551±0.651 | 7.20E-03 |
| cg03545635 | 7 | 2471551   | GeneBody/5'UTR/1st intron | <i>CHST12</i>    | 2.011±0.187  | 2.146±0.217  | 1.47E-03 |
| cg25175370 | 7 | 2595131   | GeneBody/5'UTR/1st exon   | <i>BRAT1</i>     | -5.512±0.632 | -6.169±0.659 | 1.16E-05 |
| cg26627486 | 7 | 2595589   | TSS200                    | <i>BRAT1</i>     | -3.929±0.234 | -4.092±0.274 | 2.23E-03 |
| cg24743283 | 7 | 2884365   | TSS1500                   | <i>GNA12</i>     | -4.358±0.436 | -4.69±0.441  | 6.59E-04 |
| cg26937500 | 7 | 3083338   | GeneBody/5'UTR/1st exon   | <i>CARD11</i>    | -4.065±0.469 | -4.422±0.499 | 7.39E-04 |
| cg23512028 | 7 | 5085596   | GeneBody/5'UTR/1st exon   | <i>RBAK</i>      | -4.492±0.613 | -4.915±0.654 | 1.92E-03 |
| cg04336379 | 7 | 5111669   | TSS200                    | <i>RBAKDN</i>    | -1.708±0.437 | -2.026±0.506 | 1.77E-03 |
| cg09961373 | 7 | 5229658   | TSS200                    | <i>WIP1</i>      | -5.084±0.401 | -5.393±0.519 | 1.07E-03 |
| cg23175281 | 7 | 5569860   | GeneBody/5'UTR/1st intron | <i>ACTB</i>      | -5.886±0.52  | -6.185±0.559 | 9.11E-03 |
| cg01527212 | 7 | 5821151   | GeneBody/5'UTR/1st intron | <i>RNF216</i>    | -5.486±0.75  | -6.135±0.699 | 1.20E-04 |
| cg04317940 | 7 | 6048614   | GeneBody/1st intron       | <i>PMS2</i>      | -5.216±0.553 | -5.524±0.475 | 8.33E-03 |
| cg10485724 | 7 | 6049035   | GeneBody/1st exon         | <i>AIMP2</i>     | -4.924±0.504 | -5.228±0.503 | 5.57E-03 |
| cg11248491 | 7 | 6312525   | TSS1500                   | <i>CYTH3</i>     | -4.013±0.354 | -4.323±0.46  | 2.58E-04 |
| cg21939482 | 7 | 6388130   | GeneBody/5'UTR/1st intron | <i>FAM220A</i>   | -4.121±0.209 | -4.401±0.386 | 3.01E-06 |
| cg00784357 | 7 | 6413877   | TSS1500                   | <i>RAC1</i>      | -5.245±0.38  | -5.57±0.372  | 1.53E-04 |
| cg01852328 | 7 | 6487989   | TSS1500                   | <i>DAGLB</i>     | -3.673±0.648 | -4.084±0.624 | 3.43E-03 |
| cg25909811 | 7 | 6523253   | GeneBody/1st intron       | <i>KDELR2</i>    | -5.037±0.687 | -5.738±0.716 | 1.54E-05 |
| cg27221338 | 7 | 6525025   | TSS1500                   | <i>KDELR2</i>    | 2.261±0.263  | 2.436±0.383  | 5.88E-03 |
| cg21212956 | 7 | 6617294   | GeneBody/5'UTR/1st exon   | <i>ZDHHC4</i>    | -4.047±0.348 | -4.273±0.557 | 9.78E-03 |
| cg03930970 | 7 | 6618160   | GeneBody/5'UTR/1st intron | <i>ZDHHC4</i>    | 2.861±0.202  | 3.062±0.301  | 8.48E-05 |
| cg12592779 | 7 | 6745725   | GeneBody/5'UTR/1st intron | <i>ZNF12</i>     | -3.333±0.469 | -3.651±0.689 | 5.14E-03 |
| cg05373276 | 7 | 6865861   | GeneBody/5'UTR/1st exon   | <i>CCZ1B</i>     | -4.889±0.576 | -5.332±0.686 | 8.49E-04 |
| cg00053647 | 7 | 6866072   | TSS200                    | <i>CCZ1B</i>     | -3.539±0.256 | -3.349±0.308 | 1.29E-03 |
| cg05434957 | 7 | 8301435   | GeneBody/5'UTR/1st intron | <i>ICA1</i>      | -5.361±0.517 | -5.706±0.563 | 2.80E-03 |
| cg10798171 | 7 | 8302301   | TSS200                    | <i>ICA1</i>      | -1.594±0.28  | -1.28±0.351  | 6.43E-06 |
| cg16837769 | 7 | 10979899  | TSS200                    | <i>NDUFA4</i>    | -4.369±0.428 | -4.704±0.445 | 5.10E-04 |
| cg21597649 | 7 | 12251342  | GeneBody/5'UTR/1st intron | <i>TMEM106B</i>  | -3.913±0.24  | -4.126±0.302 | 1.97E-04 |
| cg03166779 | 7 | 14029285  | GeneBody/5'UTR/1st exon   | <i>ETV1</i>      | -4.81±0.511  | -5.268±0.529 | 9.53E-05 |
| cg00003994 | 7 | 15725862  | GeneBody/1st exon         | <i>MEOX2</i>     | -3.675±0.332 | -3.93±0.389  | 8.27E-04 |
| cg13047892 | 7 | 15726649  | TSS1500                   | <i>MEOX2</i>     | -4.039±0.247 | -4.389±0.392 | 3.35E-07 |
| cg11166252 | 7 | 17338258  | TSS200                    | <i>AHR</i>       | -5.92±0.591  | -6.31±0.466  | 1.83E-03 |
| cg12081743 | 7 | 18535499  | GeneBody/5'UTR/1st exon   | <i>HDAC9</i>     | -2.774±0.295 | -2.965±0.372 | 5.08E-03 |
| cg20498685 | 7 | 19156086  | GeneBody/1st intron/3'UTR | <i>Twist1</i>    | -3.749±0.303 | -3.962±0.375 | 2.33E-03 |
| cg00240432 | 7 | 19157296  | TSS200                    | <i>Twist1</i>    | -4.45±0.299  | -4.764±0.414 | 2.75E-05 |
| cg16721202 | 7 | 21467390  | TSS1500                   | <i>SP4</i>       | -4.178±0.498 | -4.607±0.495 | 1.44E-04 |
| cg13316191 | 7 | 21985884  | TSS1500                   | <i>CDCa7L</i>    | -4.61±0.482  | -4.901±0.457 | 5.12E-03 |
| cg26716323 | 7 | 22862328  | GeneBody/1st exon         | <i>TOMM7</i>     | -4.989±0.424 | -5.346±0.413 | 1.82E-04 |
| cg12266024 | 7 | 23053912  | TSS200                    | <i>FAM126A</i>   | -4.903±0.396 | -5.305±0.573 | 5.38E-05 |
| cg03403539 | 7 | 23221679  | GeneBody/5'UTR/1st exon   | <i>NUPL2</i>     | -5.084±0.576 | -5.512±0.587 | 8.52E-04 |
| cg01182585 | 7 | 23338735  | TSS1500                   | <i>MALSU1</i>    | -4.361±0.504 | -4.682±0.632 | 5.66E-03 |
| cg23859078 | 7 | 23339092  | GeneBody/1st exon         | <i>MALSU1</i>    | -5.486±0.51  | -5.891±0.523 | 4.21E-04 |
| cg02860543 | 7 | 23510648  | TSS1500                   | <i>IGF2BP3</i>   | -2.67±0.474  | -2.964±0.487 | 4.78E-03 |
| cg06452064 | 7 | 23571393  | GeneBody/1st intron       | <i>TRA2A</i>     | -4.639±0.448 | -5.02±0.429  | 1.59E-04 |
| cg19747852 | 7 | 23571693  | TSS200                    | <i>TRA2A</i>     | -4.352±0.37  | -4.647±0.593 | 1.64E-03 |
| cg01758870 | 7 | 23719630  | TSS200                    | <i>FAM221A</i>   | 0.289±0.124  | 0.413±0.157  | 3.55E-05 |
| cg08707078 | 7 | 23720292  | GeneBody/1st intron       | <i>FAM221A</i>   | -3.783±0.534 | -4.115±0.528 | 4.32E-03 |
| cg25612145 | 7 | 23749639  | TSS200                    | <i>STK31</i>     | 3.908±0.229  | 3.771±0.257  | 7.44E-03 |
| cg24805239 | 7 | 24797486  | GeneBody/5'UTR/1st exon   | <i>DFNA5</i>     | -3.512±0.298 | -3.817±0.415 | 3.99E-05 |
| cg15309066 | 7 | 25164988  | TSS200                    | <i>CYCS</i>      | -5.33±0.415  | -5.728±0.578 | 1.02E-04 |
| cg26172108 | 7 | 25220162  | TSS1500                   | <i>C7orf31</i>   | -4.062±0.186 | -4.243±0.344 | 3.65E-04 |
| cg14534464 | 7 | 26191633  | TSS1500                   | <i>NFE2L3</i>    | -4.085±0.401 | -4.338±0.501 | 6.02E-03 |

|            |   |          |                           |                  |              |              |          |
|------------|---|----------|---------------------------|------------------|--------------|--------------|----------|
| cg13351698 | 7 | 26240574 | TSS200                    | <i>HNRNPA2B1</i> | -4.347±0.501 | -4.627±0.483 | 9.45E-03 |
| cg21120786 | 7 | 26904188 | GeneBody/5'UTR/1st exon   | <i>SKAP2</i>     | -2.799±0.13  | -2.994±0.271 | 1.15E-06 |
| cg03700462 | 7 | 27135684 | TSS200                    | <i>HOTAIRM1</i>  | -4.017±0.304 | -4.383±0.427 | 3.17E-06 |
| cg23432345 | 7 | 27196153 | GeneBody/1st exon         | <i>HOXA7</i>     | -3.413±0.338 | -3.652±0.516 | 4.20E-03 |
| cg07778029 | 7 | 27205114 | GeneBody/5'UTR/1st exon   | <i>HOXA9</i>     | -3.273±0.282 | -3.491±0.417 | 1.61E-03 |
| cg17950095 | 7 | 27224700 | GeneBody/1st exon         | <i>HOXA11</i>    | -1.213±0.127 | -1.375±0.251 | 1.14E-05 |
| cg08440125 | 7 | 27702596 | GeneBody/5'UTR/1st exon   | <i>HIBADH</i>    | -4.618±0.214 | -4.815±0.276 | 1.27E-04 |
| cg03792199 | 7 | 27702785 | TSS200                    | <i>HIBADH</i>    | -4.741±0.411 | -5.019±0.55  | 4.08E-03 |
| cg11084020 | 7 | 27779567 | TSS200                    | <i>TAX1BP1</i>   | -5.238±0.578 | -5.601±0.688 | 5.67E-03 |
| cg00836605 | 7 | 28220047 | TSS200                    | <i>JAZF1-AS1</i> | -5.802±0.553 | -6.101±0.425 | 9.42E-03 |
| cg26179948 | 7 | 28220645 | TSS1500                   | <i>JAZF1</i>     | -4.109±0.432 | -4.403±0.541 | 3.20E-03 |
| cg24448259 | 7 | 29186110 | GeneBody/5'UTR/1st exon   | <i>CPVL</i>      | -4.326±0.504 | -4.619±0.46  | 6.55E-03 |
| cg12658982 | 7 | 29603541 | GeneBody/5'UTR/1st exon   | <i>PRR15</i>     | -4.543±0.295 | -5.005±0.446 | 2.87E-08 |
| cg10639440 | 7 | 30029231 | GeneBody/5'UTR/1st intron | <i>SCRN1</i>     | -3.508±0.399 | -3.26±0.477  | 6.12E-03 |
| cg03054529 | 7 | 30029938 | TSS200                    | <i>SCRN1</i>     | 1.057±0.191  | 1.205±0.246  | 1.05E-03 |
| cg11601662 | 7 | 30066256 | GeneBody/5'UTR/1st exon   | <i>FKBP14</i>    | -4.526±0.44  | -4.822±0.518 | 3.07E-03 |
| cg10982775 | 7 | 30067792 | TSS200                    | <i>PLEKHA8</i>   | -5.024±0.437 | -5.271±0.375 | 7.60E-03 |
| cg21636748 | 7 | 30068791 | GeneBody/1st intron       | <i>PLEKHA8</i>   | -4.339±0.366 | -4.573±0.371 | 3.55E-03 |
| cg16391151 | 7 | 30518197 | GeneBody/5'UTR/1st intron | <i>NOD1</i>      | -5.33±0.42   | -5.698±0.418 | 1.20E-04 |
| cg15815016 | 7 | 30518667 | TSS1500                   | <i>NOD1</i>      | -4.513±0.371 | -4.88±0.375  | 2.32E-05 |
| cg05142115 | 7 | 30544301 | GeneBody/1st exon         | <i>GGCT</i>      | -4.426±0.453 | -4.798±0.591 | 5.53E-04 |
| cg23780937 | 7 | 30544484 | TSS200                    | <i>GGCT</i>      | -5.029±0.543 | -5.398±0.539 | 1.93E-03 |
| cg04551925 | 7 | 30951740 | GeneBody/1st exon         | <i>AQP1</i>      | 0.535±0.284  | 0.695±0.272  | 9.16E-03 |
| cg27076139 | 7 | 31091718 | TSS1500                   | <i>ADCYAP1R1</i> | -4.423±0.42  | -4.677±0.479 | 7.09E-03 |
| cg02299653 | 7 | 32529972 | GeneBody/1st exon         | <i>LSM5</i>      | -4.213±0.895 | -5.121±0.826 | 1.28E-05 |
| cg14853515 | 7 | 32530038 | TSS200                    | <i>LSM5</i>      | -5.914±0.647 | -6.354±0.503 | 1.36E-03 |
| cg06331674 | 7 | 32534854 | GeneBody/5'UTR/1st exon   | <i>LSM5</i>      | -4.725±0.66  | -5.137±0.593 | 3.49E-03 |
| cg07520158 | 7 | 32535189 | GeneBody/5'UTR/1st exon   | <i>AVL9</i>      | -4.486±0.307 | -4.826±0.523 | 3.49E-05 |
| cg09080746 | 7 | 33169470 | GeneBody/5'UTR/1st exon   | <i>BBS9</i>      | -4.447±0.415 | -4.849±0.61  | 1.11E-04 |
| cg08703595 | 7 | 35734160 | GeneBody/5'UTR            | <i>HERPUD2</i>   | -3.676±0.432 | -3.204±0.662 | 2.51E-05 |
| cg04508286 | 7 | 35840410 | TSS200                    | <i>44081</i>     | -5.234±0.405 | -5.476±0.381 | 5.52E-03 |
| cg12776163 | 7 | 35840706 | GeneBody/5'UTR/1st exon   | <i>44081</i>     | -4.765±0.407 | -5.29±0.607  | 1.33E-06 |
| cg23700778 | 7 | 36406715 | GeneBody/5'UTR/1st exon   | <i>KIAA0895</i>  | -5.17±0.331  | -5.404±0.507 | 4.37E-03 |
| cg18607470 | 7 | 36407067 | TSS200                    | <i>KIAA0895</i>  | -5.562±0.458 | -6.063±0.596 | 1.09E-05 |
| cg18491230 | 7 | 36429601 | GeneBody/1st exon         | <i>KIAA0895</i>  | -4.331±0.387 | -4.692±0.453 | 7.64E-05 |
| cg19118812 | 7 | 37488438 | GeneBody/5'UTR/1st exon   | <i>ELMO1</i>     | -4.739±0.331 | -5.105±0.581 | 4.51E-05 |
| cg24995381 | 7 | 37780156 | GeneBody/1st exon         | <i>GPR141</i>    | 3.095±0.181  | 3.248±0.165  | 1.55E-04 |
| cg19166347 | 7 | 37955598 | GeneBody/1st intron       | <i>SFRP4</i>     | -3.566±0.287 | -3.808±0.441 | 7.30E-04 |
| cg10806140 | 7 | 37956554 | TSS200                    | <i>SFRP4</i>     | -4.401±0.264 | -4.591±0.344 | 2.10E-03 |
| cg00312919 | 7 | 38217710 | TSS200                    | <i>STARD3NL</i>  | -5.509±0.485 | -5.832±0.401 | 1.76E-03 |
| cg09964445 | 7 | 38671659 | TSS1500                   | <i>AMPH</i>      | 2.518±0.29   | 2.688±0.295  | 7.38E-03 |
| cg08724636 | 7 | 39663756 | GeneBody/5'UTR/1st intron | <i>RALA</i>      | -5.876±0.631 | -6.454±0.601 | 5.85E-05 |
| cg20991801 | 7 | 39990729 | GeneBody/1st exon         | <i>CDK13</i>     | -4.357±0.446 | -4.643±0.531 | 4.77E-03 |
| cg16415646 | 7 | 41743001 | TSS1500                   | <i>INHBA</i>     | 0.736±0.246  | 0.572±0.333  | 4.66E-03 |
| cg09405612 | 7 | 42275870 | GeneBody/5'UTR/1st intron | <i>GLI3</i>      | -4.807±0.517 | -5.196±0.615 | 1.09E-03 |
| cg17530977 | 7 | 42275872 | GeneBody/5'UTR/1st intron | <i>GLI3</i>      | -4.397±0.428 | -4.695±0.402 | 1.45E-03 |
| cg22805517 | 7 | 42951105 | GeneBody/5'UTR/1st intron | <i>C7orf25</i>   | -4.424±0.335 | -4.71±0.434  | 3.42E-04 |
| cg04350646 | 7 | 42972170 | GeneBody/1st intron       | <i>MRPL32</i>    | -5.178±0.608 | -5.766±0.627 | 3.36E-05 |
| cg23281417 | 7 | 43622366 | TSS1500                   | <i>STK17A</i>    | -5.017±0.372 | -5.266±0.346 | 1.98E-03 |
| cg21309049 | 7 | 43623222 | GeneBody/1st intron       | <i>STK17A</i>    | -5.263±0.594 | -5.713±0.539 | 5.56E-04 |
| cg00167504 | 7 | 43798622 | GeneBody/5'UTR/1st intron | <i>BLVRA</i>     | -4.341±0.245 | -4.675±0.36  | 5.03E-07 |
| cg11528101 | 7 | 43909044 | GeneBody/1st intron       | <i>MRPS24</i>    | -5.536±0.43  | -6.121±0.665 | 6.57E-07 |
| cg21048501 | 7 | 43909515 | TSS1500                   | <i>MRPS24</i>    | -4.236±0.4   | -4.571±0.45  | 2.84E-04 |
| cg22222251 | 7 | 44039076 | TSS1500                   | <i>SPDYE1</i>    | 0.855±0.272  | 1.007±0.26   | 9.51E-03 |
| cg06852744 | 7 | 44142973 | TSS1500                   | <i>AEBP1</i>     | 3.1±0.226    | 2.953±0.272  | 4.51E-03 |
| cg02126753 | 7 | 44143998 | GeneBody/5'UTR/1st exon   | <i>AEBP1</i>     | -3.613±0.356 | -3.964±0.42  | 3.76E-05 |
| cg13916931 | 7 | 44162801 | GeneBody/5'UTR/1st exon   | <i>POLD2</i>     | -4.233±0.276 | -4.463±0.35  | 4.22E-04 |
| cg18412613 | 7 | 44240514 | TSS200                    | <i>YKT6</i>      | -2.996±0.181 | -3.263±0.338 | 5.69E-07 |
| cg03521347 | 7 | 44529975 | GeneBody/1st intron       | <i>NUDCD3</i>    | -5.414±0.632 | -6.021±0.608 | 3.12E-05 |
| cg05459203 | 7 | 44530674 | TSS1500                   | <i>NUDCD3</i>    | -4.769±0.586 | -5.26±0.526  | 1.68E-04 |
| cg17754680 | 7 | 44581831 | TSS1500                   | <i>NPC1L1</i>    | 1.186±0.168  | 1.316±0.252  | 1.72E-03 |
| cg05057057 | 7 | 44613977 | GeneBody/5'UTR/1st exon   | <i>DDX56</i>     | -4.275±0.229 | -4.438±0.279 | 1.96E-03 |
| cg26817382 | 7 | 44621808 | GeneBody/5'UTR/1st exon   | <i>TMED4</i>     | -5.724±0.494 | -6.07±0.632  | 2.58E-03 |
| cg22627950 | 7 | 44622302 | TSS1500                   | <i>TMED4</i>     | -4.67±0.287  | -5.023±0.405 | 2.35E-06 |
| cg12520111 | 7 | 44835727 | TSS1500                   | <i>PPIA</i>      | -5.097±0.441 | -5.369±0.472 | 5.12E-03 |
| cg17269548 | 7 | 44836290 | GeneBody/5'UTR/1st exon   | <i>PPIA</i>      | -1.55±0.308  | -1.908±0.409 | 4.37E-06 |
| cg00947019 | 7 | 44887958 | TSS1500                   | <i>H2AFV</i>     | -5.198±0.459 | -5.539±0.4   | 6.42E-04 |
| cg22878324 | 7 | 44925316 | TSS1500                   | <i>PURB</i>      | -5.051±0.408 | -5.428±0.503 | 1.04E-04 |
| cg00677811 | 7 | 45040321 | GeneBody/1st intron       | <i>CCM2</i>      | -4.528±0.402 | -4.966±0.52  | 1.12E-05 |
| cg11959821 | 7 | 45151241 | GeneBody/5'UTR/1st intron | <i>TBRG4</i>     | -4.759±0.462 | -5.203±0.654 | 1.03E-04 |
| cg22083798 | 7 | 45961401 | TSS1500                   | <i>IGFBP3</i>    | -2.931±0.263 | -3.142±0.299 | 4.52E-04 |
| cg12034229 | 7 | 48018855 | GeneBody/1st intron       | <i>HUS1</i>      | -5.889±0.514 | -6.283±0.486 | 5.25E-04 |
| cg14265670 | 7 | 48128300 | TSS200                    | <i>UPP1</i>      | -4.566±0.296 | -4.963±0.409 | 4.97E-07 |
| cg06590610 | 7 | 50444317 | GeneBody                  | <i>IKZF1</i>     | 2.701±0.217  | 2.886±0.341  | 7.51E-04 |
| cg15359413 | 7 | 50517931 | GeneBody/5'UTR/1st intron | <i>FIGNL1</i>    | -4.816±0.405 | -5.324±0.469 | 7.80E-07 |
| cg03843951 | 7 | 50629634 | TSS1500                   | <i>DDC</i>       | 1.749±0.159  | 1.937±0.264  | 1.10E-05 |
| cg08835688 | 7 | 50849931 | GeneBody/5'UTR/1st intron | <i>GRB10</i>     | 0.858±0.131  | 0.968±0.195  | 6.85E-04 |
| cg07619076 | 7 | 55433148 | GeneBody/5'UTR/1st exon   | <i>LANCL2</i>    | -2.704±0.678 | -3.207±0.66  | 8.18E-04 |
| cg01048931 | 7 | 55639931 | GeneBody/1st intron       | <i>VOPP1</i>     | -4.605±0.539 | -4.924±0.535 | 6.28E-03 |
| cg11808544 | 7 | 55756860 | GeneBody/1st exon         | <i>FKBP9L</i>    | -1.323±0.157 | -1.48±0.224  | 6.17E-05 |
| cg08107767 | 7 | 56019574 | TSS200                    | <i>MRPS17</i>    | -5.118±0.352 | -5.365±0.565 | 5.36E-03 |
| cg27190537 | 7 | 56131961 | GeneBody/5'UTR/1st exon   | <i>SUMF2</i>     | -5.201±0.448 | -5.693±0.519 | 6.97E-06 |
| cg12392669 | 7 | 56173831 | GeneBody/1st intron       | <i>CHCHD2</i>    | -3.978±0.199 | -4.202±0.379 | 6.17E-05 |
| cg21096502 | 7 | 56174374 | TSS200                    | <i>CHCHD2</i>    | -4.835±0.251 | -5.019±0.25  | 9.27E-04 |
| cg19393233 | 7 | 64453002 | GeneBody                  | <i>ERV3-1</i>    | 3.346±0.185  | 3.493±0.28   | 1.30E-03 |
| cg26856388 | 7 | 65337895 | TSS1500                   | <i>VKORC1L1</i>  | -3.168±0.186 | -2.99±0.284  | 1.53E-04 |
| cg10774155 | 7 | 65338427 | GeneBody/1st exon         | <i>VKORC1L1</i>  | -5.648±0.646 | -6.296±0.671 | 1.98E-05 |
| cg19319490 | 7 | 65447113 | GeneBody/1st exon         | <i>GUSB</i>      | -6.102±0.56  | -6.691±0.644 | 1.24E-05 |
| cg21937169 | 7 | 65541137 | GeneBody/1st intron       | <i>ASL</i>       | -4.201±0.458 | -4.487±0.445 | 3.97E-03 |
| cg12463550 | 7 | 65579703 | TSS200                    | <i>CRCP</i>      | -4.881±0.398 | -5.247±0.58  | 2.13E-04 |
| cg14517922 | 7 | 65889460 | 0                         | 0                | 2.898±0.192  | 3.004±0.162  | 8.53E-03 |
| cg15423613 | 7 | 66093349 | TSS1500                   | <i>KCTD7</i>     | -4.705±0.402 | -5.124±0.527 | 2.39E-05 |
| cg12288365 | 7 | 66094096 | GeneBody/1st exon         | <i>KCTD7</i>     | -5.546±0.418 | -5.909±0.664 | 6.24E-04 |
| cg14702264 | 7 | 66385829 | TSS1500                   | <i>TMEM248</i>   | -3.947±0.372 | -4.223±0.285 | 5.48E-04 |
| cg16075384 | 7 | 66386859 | GeneBody/5'UTR/1st intron | <i>TMEM248</i>   | -4.226±0.354 | -4.622±0.475 | 7.43E-06 |

|            |   |          |                           |                     |              |              |          |
|------------|---|----------|---------------------------|---------------------|--------------|--------------|----------|
| cg23517664 | 7 | 66460537 | GeneBody/5'UTR/1st exon   | <i>SBDS</i>         | -5.017±0.335 | -5.226±0.322 | 3.91E-03 |
| cg15753757 | 7 | 69064347 | GeneBody/5'UTR/1st exon   | <i>AUTS2</i>        | -4.708±0.498 | -5.002±0.456 | 5.88E-03 |
| cg11828089 | 7 | 71878121 | TSS1500                   | <i>CALN1</i>        | 2.737±0.181  | 3.043±0.37   | 7.81E-08 |
| cg07033083 | 7 | 72424763 | GeneBody                  | <i>NSUN5P2</i>      | -2.064±0.256 | -2.262±0.33  | 9.94E-04 |
| cg04033650 | 7 | 72722679 | GeneBody/1st intron       | <i>NSUN5</i>        | -5.296±0.477 | -5.658±0.544 | 8.86E-04 |
| cg01251255 | 7 | 72722951 | TSS200                    | <i>NSUN5</i>        | -5.194±0.667 | -5.741±0.638 | 2.48E-04 |
| cg15396310 | 7 | 72971398 | GeneBody/1st exon         | <i>BCL7B</i>        | -5.098±0.397 | -5.378±0.573 | 3.55E-03 |
| cg02290509 | 7 | 72992915 | GeneBody/5'UTR/1st exon   | <i>TBL2</i>         | -5.021±0.361 | -5.285±0.37  | 1.03E-03 |
| cg22511633 | 7 | 72993507 | TSS1500                   | <i>TBL2</i>         | -4.149±0.396 | -4.429±0.455 | 1.82E-03 |
| cg04134859 | 7 | 73097692 | GeneBody/1st exon         | <i>DNAJC30</i>      | -5.252±0.299 | -5.482±0.437 | 1.57E-03 |
| cg26561611 | 7 | 73097960 | GeneBody/1st exon         | <i>WBSCR22</i>      | -4.774±0.452 | -5.251±0.659 | 3.28E-05 |
| cg14534967 | 7 | 73153139 | GeneBody/1st exon         | <i>ABHD11</i>       | -5.138±0.324 | -5.557±0.493 | 1.43E-06 |
| cg21942546 | 7 | 73154357 | TSS1500                   | <i>ABHD11</i>       | 3.757±0.418  | 4.052±0.435  | 1.50E-03 |
| cg03969997 | 7 | 73256865 | TSS200                    | <i>WBSCR27</i>      | -4.832±0.403 | -5.098±0.434 | 2.98E-03 |
| cg00827369 | 7 | 73588253 | TSS1500                   | <i>EIF4H</i>        | -4.506±0.326 | -4.779±0.422 | 4.24E-04 |
| cg00955230 | 7 | 73669205 | TSS1500                   | <i>RFC2</i>         | -3.934±0.383 | -4.276±0.412 | 1.10E-04 |
| cg08695830 | 7 | 73703459 | TSS1500                   | <i>CLIP2</i>        | -3.631±0.325 | -3.911±0.361 | 1.92E-04 |
| cg09667122 | 7 | 74268072 | TSS1500                   | <i>GTF2IRD2</i>     | -3.55±0.375  | -3.795±0.491 | 5.24E-03 |
| cg08418747 | 7 | 74306526 | GeneBody/1st exon         | <i>STAG3L2</i>      | -5.631±0.534 | -6.027±0.462 | 6.52E-04 |
| cg02053171 | 7 | 74489585 | GeneBody/5'UTR/1st exon   | <i>WBSCR16</i>      | -4.792±0.459 | -5.065±0.559 | 8.82E-03 |
| cg03373857 | 7 | 74489715 | TSS200                    | <i>WBSCR16</i>      | -4.339±0.35  | -4.751±0.654 | 2.73E-05 |
| cg11237883 | 7 | 75677249 | GeneBody/5'UTR/1st exon   | <i>STYXL1</i>       | -4.85±0.341  | -5.293±0.475 | 8.16E-07 |
| cg24242194 | 7 | 75677414 | GeneBody/5'UTR/1st exon   | <i>MDH2</i>         | -5.14±0.372  | -5.607±0.57  | 2.45E-06 |
| cg27376817 | 7 | 75931888 | GeneBody/5'UTR/1st exon   | <i>HSPB1</i>        | -3.572±0.542 | -4.023±0.583 | 2.70E-04 |
| cg06186973 | 7 | 75988652 | TSS1500                   | <i>YWHAG</i>        | -5.337±0.483 | -5.611±0.456 | 8.25E-03 |
| cg09916572 | 7 | 76026853 | GeneBody/5'UTR/1st exon   | <i>ZP3</i>          | -4.33±0.455  | -4.612±0.546 | 6.41E-03 |
| cg04028573 | 7 | 76257006 | TSS1500                   | <i>POMZP3</i>       | -5.07±0.308  | -5.311±0.403 | 9.33E-04 |
| cg10763059 | 7 | 77165728 | TSS1500                   | <i>PTPN12</i>       | -3.933±0.476 | -4.332±0.595 | 4.30E-04 |
| cg12428604 | 7 | 77427426 | GeneBody/5'UTR/1st intron | <i>TMEM60</i>       | -5.248±0.405 | -5.57±0.383  | 3.52E-04 |
| cg05806233 | 7 | 79763748 | TSS1500                   | <i>GNAI1</i>        | -4.036±0.389 | -4.389±0.541 | 2.05E-04 |
| cg19815904 | 7 | 80548307 | GeneBody/5'UTR/1st exon   | <i>SEMA3C</i>       | -3.116±0.28  | -2.815±0.344 | 1.14E-05 |
| cg05742308 | 7 | 83824384 | TSS200                    | <i>SEMA3A</i>       | -4.403±0.516 | -4.867±0.494 | 7.84E-05 |
| cg27089973 | 7 | 86781459 | TSS1500                   | <i>DMTF1</i>        | -4.423±0.308 | -4.635±0.343 | 2.15E-03 |
| cg10833091 | 7 | 86848751 | GeneBody/1st exon         | <i>TMEM243</i>      | -4.401±0.376 | -4.647±0.537 | 6.33E-03 |
| cg11256279 | 7 | 86849303 | TSS1500                   | <i>TMEM243</i>      | -4.609±0.494 | -4.892±0.474 | 7.80E-03 |
| cg14651992 | 7 | 86974674 | GeneBody/1st exon         | <i>TP53TG1</i>      | -4.919±0.304 | -5.136±0.284 | 1.09E-03 |
| cg14001567 | 7 | 86974838 | TSS200                    | <i>TP53TG1</i>      | -3.691±0.395 | -4.062±0.594 | 1.88E-04 |
| cg15652797 | 7 | 86974991 | GeneBody/5'UTR/1st exon   | <i>CROT</i>         | -3.972±0.209 | -4.214±0.382 | 3.09E-05 |
| cg13741326 | 7 | 86975244 | GeneBody/5'UTR/1st intron | <i>CROT</i>         | -4.84±0.43   | -5.246±0.372 | 3.25E-05 |
| cg01966465 | 7 | 87257416 | TSS1500                   | <i>RUNDC3B</i>      | -4.493±0.375 | -4.837±0.464 | 1.12E-04 |
| cg15414833 | 7 | 87257767 | GeneBody/5'UTR/1st exon   | <i>RUNDC3B</i>      | -4.965±0.543 | -5.301±0.578 | 5.07E-03 |
| cg16219122 | 7 | 87343956 | TSS1500                   | <i>ABCB1</i>        | 0.097±0.336  | -0.192±0.422 | 2.82E-04 |
| cg22802739 | 7 | 87505101 | TSS1500                   | <i>DBF4</i>         | -4.181±0.402 | -4.602±0.509 | 1.89E-05 |
| cg01795161 | 7 | 87506981 | TSS1500                   | <i>SLC25A40</i>     | -0.965±0.302 | -1.191±0.303 | 7.88E-04 |
| cg05131524 | 7 | 87563251 | TSS1500                   | <i>ADAM22</i>       | -3.592±0.284 | -3.414±0.34  | 6.01E-03 |
| cg23219720 | 7 | 88388555 | TSS200                    | <i>ZNF804B</i>      | -2.733±0.241 | -2.5±0.302   | 5.81E-05 |
| cg07588113 | 7 | 89874465 | TSS200                    | <i>C7orf63</i>      | -5.09±0.421  | -5.339±0.521 | 9.67E-03 |
| cg11909310 | 7 | 89975786 | TSS200                    | <i>GTPBP10</i>      | -4.275±0.546 | -4.617±0.513 | 3.74E-03 |
| cg14298726 | 7 | 89976216 | GeneBody/1st intron       | <i>GTPBP10</i>      | -3.106±0.388 | -3.337±0.319 | 4.84E-03 |
| cg21746887 | 7 | 90893279 | TSS1500                   | <i>FZD1</i>         | -4.288±0.561 | -4.701±0.534 | 8.29E-04 |
| cg11159727 | 7 | 91509742 | GeneBody/5'UTR/1st intron | <i>MTERF</i>        | -2.896±0.573 | -3.26±0.53   | 3.24E-03 |
| cg17054360 | 7 | 91510326 | TSS1500                   | <i>MTERF</i>        | -3.85±0.488  | -4.153±0.59  | 6.41E-03 |
| cg23723933 | 7 | 91569823 | TSS1500                   | <i>AKAP9</i>        | -4.099±0.293 | -4.382±0.374 | 6.38E-05 |
| cg24896109 | 7 | 91764007 | GeneBody/5'UTR/1st exon   | <i>CYP51A1</i>      | -5.643±0.471 | -5.972±0.491 | 1.63E-03 |
| cg14520511 | 7 | 91875046 | GeneBody/5'UTR/1st exon   | <i>KRIT1</i>        | -4.796±0.638 | -5.443±0.578 | 1.24E-05 |
| cg08771429 | 7 | 91876374 | GeneBody/5'UTR/1st intron | <i>ANKIB1</i>       | -3.841±0.397 | -4.074±0.464 | 9.20E-03 |
| cg00084687 | 7 | 92076896 | GeneBody/5'UTR/1st exon   | <i>GATAD1</i>       | -5.469±0.523 | -5.815±0.517 | 2.44E-03 |
| cg24030425 | 7 | 92157488 | GeneBody/1st intron       | <i>PEX1</i>         | -3.803±0.242 | -4.043±0.395 | 1.38E-04 |
| cg27402949 | 7 | 92861678 | GeneBody/5'UTR/1st exon   | <i>CCDC132</i>      | -4.699±0.345 | -5.039±0.474 | 6.61E-05 |
| cg21270593 | 7 | 94293250 | GeneBody                  | <i>PEG10</i>        | 4.768±0.251  | 5.059±0.434  | 2.02E-05 |
| cg04951204 | 7 | 94537584 | GeneBody/5'UTR/1st intron | <i>PPP1R9A</i>      | -3.712±0.344 | -4.001±0.424 | 3.60E-04 |
| cg09643313 | 7 | 94537893 | GeneBody/5'UTR/1st intron | <i>PPP1R9A</i>      | -2.782±0.171 | -2.652±0.305 | 4.01E-03 |
| cg23285573 | 7 | 95064174 | GeneBody/1st intron       | <i>PON2</i>         | -4.519±0.266 | -4.67±0.261  | 8.46E-03 |
| cg10281478 | 7 | 95402528 | GeneBody/5'UTR/1st intron | <i>DYNC11I</i>      | -1.003±0.142 | -1.098±0.203 | 5.43E-03 |
| cg15781316 | 7 | 96339267 | TSS200                    | <i>SHFM1</i>        | -5.301±0.587 | -5.643±0.576 | 7.09E-03 |
| cg12041387 | 7 | 96650171 | GeneBody                  | <i>DLX5</i>         | -1.454±0.281 | -1.259±0.312 | 1.93E-03 |
| cg00096922 | 7 | 96654185 | TSS200                    | <i>DLX5</i>         | -4.321±0.394 | -4.582±0.457 | 3.46E-03 |
| cg01169726 | 7 | 96654425 | TSS1500                   | <i>DLX5</i>         | -2.791±0.276 | -2.972±0.35  | 4.49E-03 |
| cg24205633 | 7 | 96746928 | GeneBody/5'UTR/1st exon   | <i>ACN9</i>         | -5.623±0.515 | -6.149±0.556 | 1.66E-05 |
| cg20002248 | 7 | 96747288 | GeneBody/1st intron       | <i>ACN9</i>         | -4.353±0.328 | -4.555±0.278 | 3.80E-03 |
| cg14221171 | 7 | 97361759 | GeneBody/5'UTR/1st intron | <i>TAC1</i>         | -2.252±0.256 | -2.497±0.378 | 1.35E-04 |
| cg14785449 | 7 | 97501736 | GeneBody/5'UTR/1st exon   | <i>ASNS</i>         | -4.293±0.431 | -4.61±0.453  | 1.03E-03 |
| cg01245656 | 7 | 97501918 | TSS200                    | <i>ASNS</i>         | -5.022±0.336 | -5.303±0.428 | 4.19E-04 |
| cg22152667 | 7 | 97619372 | GeneBody/1st exon         | <i>OCM2</i>         | 3.257±0.272  | 3.441±0.265  | 2.03E-03 |
| cg23242017 | 7 | 97736138 | TSS200                    | <i>LMTK2</i>        | -5.396±0.638 | -5.878±0.569 | 5.58E-04 |
| cg14640481 | 7 | 97910728 | TSS1500                   | <i>BRI3</i>         | -5.159±0.388 | -5.577±0.539 | 1.81E-05 |
| cg20637800 | 7 | 97911512 | GeneBody/1st intron       | <i>BRI3</i>         | -5.665±0.472 | -5.988±0.494 | 2.02E-03 |
| cg03564506 | 7 | 98475901 | TSS1500                   | <i>TRRAP</i>        | -4.625±0.385 | -4.868±0.367 | 3.52E-03 |
| cg22800631 | 7 | 98476628 | GeneBody/5'UTR/1st intron | <i>TRRAP</i>        | -3.473±0.691 | -3.97±0.673  | 1.10E-03 |
| cg16241648 | 7 | 98923114 | TSS1500                   | <i>ARPC1A</i>       | -4.619±0.381 | -4.874±0.366 | 2.08E-03 |
| cg00736326 | 7 | 98923878 | GeneBody/5'UTR/1st intron | <i>ARPC1A</i>       | -4.534±0.568 | -4.941±0.584 | 1.26E-03 |
| cg11467738 | 7 | 98972733 | GeneBody/5'UTR/1st intron | <i>ARPC1B</i>       | -4.483±0.435 | -4.823±0.491 | 6.28E-04 |
| cg02798801 | 7 | 99005263 | GeneBody/1st intron       | <i>PDAP1</i>        | -1.148±0.176 | -1.265±0.249 | 5.56E-03 |
| cg26259610 | 7 | 99005923 | GeneBody/1st intron       | <i>PDAP1</i>        | -4.692±0.231 | -4.939±0.278 | 1.15E-05 |
| cg18176813 | 7 | 99006468 | TSS200                    | <i>BUD31</i>        | -5.114±0.422 | -5.391±0.43  | 2.79E-03 |
| cg10256052 | 7 | 99036534 | TSS200                    | <i>CPSF4</i>        | -5.743±0.585 | -6.213±0.599 | 3.61E-04 |
| cg09929612 | 7 | 99063714 | GeneBody/1st intron       | <i>ATP5J2-PTCD1</i> | -4.8±0.336   | -5.023±0.436 | 4.28E-03 |
| cg05575043 | 7 | 99097635 | GeneBody/1st exon         | <i>ZNF394</i>       | -4.68±0.571  | -5.14±0.619  | 3.91E-04 |
| cg08652404 | 7 | 99098009 | TSS200                    | <i>ZNF394</i>       | -4.587±0.342 | -4.84±0.455  | 1.76E-03 |
| cg20122491 | 7 | 99102313 | GeneBody/5'UTR/1st exon   | <i>ZKSCAN5</i>      | -5.173±0.462 | -5.699±0.684 | 1.04E-05 |
| cg22622686 | 7 | 99149874 | TSS200                    | <i>FAM200A</i>      | -4.539±0.444 | -4.884±0.436 | 4.97E-04 |
| cg26553682 | 7 | 99214201 | TSS1500                   | <i>ZSCAN25</i>      | -4.751±0.362 | -5.022±0.297 | 5.43E-04 |
| cg18895155 | 7 | 99214691 | GeneBody/5'UTR/1st intron | <i>ZSCAN25</i>      | -5.549±0.533 | -6.102±0.628 | 1.74E-05 |
| cg14260643 | 7 | 99277394 | GeneBody/1st intron       | <i>CYP3A5</i>       | -0.969±0.321 | -1.278±0.401 | 6.06E-05 |
| cg16879596 | 7 | 99277978 | TSS1500                   | <i>CYP3A5</i>       | 1.471±0.19   | 1.593±0.249  | 5.88E-03 |

|            |   |           |                           |              |              |              |          |
|------------|---|-----------|---------------------------|--------------|--------------|--------------|----------|
| cg23326197 | 7 | 99382370  | TSS1500                   | CYP3A4       | 0.929±0.305  | 0.749±0.317  | 7.10E-03 |
| cg19465374 | 7 | 99573278  | GeneBody/1st intron       | AZGP1        | 2.146±0.153  | 2.26±0.258   | 3.76E-03 |
| cg03429034 | 7 | 99613105  | TSS200                    | ZKSCAN1      | -4.48±0.386  | -4.84±0.416  | 6.18E-05 |
| cg26670626 | 7 | 99613244  | GeneBody/5'UTR/1st exon   | ZKSCAN1      | -5.258±0.449 | -5.799±0.618 | 2.95E-06 |
| cg12588476 | 7 | 99647494  | GeneBody/5'UTR/1st intron | ZSCAN21      | -4.36±0.4    | -4.668±0.677 | 2.83E-03 |
| cg20150743 | 7 | 99679295  | GeneBody/5'UTR/1st exon   | ZNF3         | -4.777±0.337 | -5.135±0.495 | 2.98E-05 |
| cg00929606 | 7 | 99680280  | TSS200                    | ZNF3         | -1.544±0.298 | -1.318±0.259 | 5.13E-04 |
| cg24797830 | 7 | 99686956  | GeneBody                  | COPS6        | -3.99±0.501  | -4.53±0.659  | 1.43E-05 |
| cg14796007 | 7 | 99697978  | GeneBody/5'UTR/1st exon   | MCM7         | -4.716±0.359 | -4.914±0.336 | 9.98E-03 |
| cg16284168 | 7 | 99698217  | GeneBody/5'UTR/1st exon   | MCM7         | -4.105±0.47  | -4.416±0.423 | 2.08E-03 |
| cg26568722 | 7 | 99699448  | GeneBody/5'UTR/1st exon   | MCM7         | -4.832±0.396 | -5.07±0.322  | 4.29E-03 |
| cg04280119 | 7 | 99716514  | GeneBody/5'UTR/1st exon   | TAF6         | -4.341±0.385 | -4.596±0.417 | 2.99E-03 |
| cg24555656 | 7 | 99717359  | GeneBody/5'UTR/1st exon   | CNPY4        | -5.452±0.601 | -6.076±0.608 | 1.10E-05 |
| cg17518962 | 7 | 99766552  | TSS200                    | GAL3ST4      | -2.223±0.187 | -2.403±0.295 | 1.70E-04 |
| cg06762858 | 7 | 99971256  | GeneBody/5'UTR/1st exon   | PILRA        | 1.804±0.156  | 1.94±0.234   | 4.87E-04 |
| cg18577494 | 7 | 100033938 | GeneBody/1st exon         | PPP1R35      | -4.421±0.385 | -4.649±0.471 | 9.33E-03 |
| cg08487374 | 7 | 100076562 | GeneBody/5'UTR/1st exon   | TSC22D4      | -4.838±0.434 | -5.121±0.381 | 2.33E-03 |
| cg08723608 | 7 | 100080506 | TSS1500                   | NYAP1        | 1.647±0.186  | 1.789±0.21   | 8.20E-04 |
| cg08626653 | 7 | 100082322 | GeneBody/5'UTR/1st intron | NYAP1        | 2.946±0.237  | 3.261±0.347  | 7.16E-07 |
| cg22154562 | 7 | 100136517 | TSS1500                   | AGFG2        | -6.286±0.568 | -6.683±0.551 | 1.43E-03 |
| cg03494005 | 7 | 100183994 | GeneBody/5'UTR/1st exon   | FBXO24       | -5.479±0.42  | -5.815±0.434 | 3.92E-04 |
| cg21694349 | 7 | 100184161 | GeneBody/5'UTR/1st exon   | FBXO24       | -4.079±0.175 | -4.192±0.228 | 5.72E-03 |
| cg25251635 | 7 | 100303170 | TSS1500                   | POP7         | -4.537±0.354 | -4.871±0.461 | 9.59E-05 |
| cg04044561 | 7 | 100303839 | GeneBody/5'UTR/1st exon   | POP7         | -5.372±0.438 | -5.629±0.49  | 8.52E-03 |
| cg05669210 | 7 | 100450634 | GeneBody/5'UTR/1st intron | SLC12A9      | -3.345±0.647 | -3.709±0.611 | 8.72E-03 |
| cg11592951 | 7 | 100472745 | GeneBody/5'UTR/1st exon   | SRRT         | -5.981±0.414 | -6.492±0.651 | 3.91E-06 |
| cg08560942 | 7 | 100492945 | GeneBody/5'UTR/1st intron | ACHE         | -5.037±0.442 | -5.33±0.451  | 2.56E-03 |
| cg17731261 | 7 | 100493811 | TSS1500                   | ACHE         | -5.357±0.322 | -5.655±0.534 | 3.82E-04 |
| cg07873488 | 7 | 100662570 | TSS1500                   | MUC17        | 2.178±0.335  | 2.39±0.314   | 3.30E-03 |
| cg02273392 | 7 | 100770414 | GeneBody/5'UTR/1st exon   | SERPINE1     | -4.856±0.444 | -5.105±0.392 | 8.22E-03 |
| cg03751414 | 7 | 100797809 | GeneBody/1st intron       | AP1S1        | -3.736±0.356 | -3.461±0.491 | 1.26E-03 |
| cg19873785 | 7 | 100861253 | TSS1500                   | PLOD3        | -4.355±0.53  | -4.733±0.582 | 1.52E-03 |
| cg18670235 | 7 | 100862016 | TSS1500                   | PLOD3        | -3.306±0.242 | -3.478±0.377 | 4.34E-03 |
| cg05146205 | 7 | 101458365 | TSS1500                   | CUX1         | -4.824±0.437 | -5.34±0.384  | 1.33E-04 |
| cg09648233 | 7 | 102105753 | GeneBody/1st intron       | LRWD1        | -4.531±0.399 | -4.876±0.5   | 2.65E-04 |
| cg00131121 | 7 | 102119710 | TSS1500                   | POLR2J       | -4.275±0.353 | -4.62±0.43   | 4.81E-05 |
| cg10274908 | 7 | 102257119 | GeneBody/1st exon         | RASA4B       | -4.906±0.353 | -5.234±0.541 | 2.34E-04 |
| cg22631642 | 7 | 102312065 | GeneBody/5'UTR/1st exon   | POLR2J2      | -6.149±0.622 | -6.805±0.602 | 8.28E-06 |
| cg23488190 | 7 | 102312318 | TSS200                    | POLR2J2      | -4.902±0.251 | -5.135±0.336 | 1.34E-04 |
| cg22799850 | 7 | 102714871 | GeneBody/5'UTR/1st exon   | FBXL13       | -2.736±0.308 | -2.938±0.471 | 7.87E-03 |
| cg09739907 | 7 | 102789396 | GeneBody/5'UTR/1st exon   | NAPEPLD      | -4.793±0.292 | -5.074±0.287 | 3.12E-05 |
| cg04036714 | 7 | 102789509 | GeneBody/5'UTR/1st exon   | NAPEPLD      | -5.354±0.337 | -5.829±0.532 | 3.71E-07 |
| cg05755837 | 7 | 102937659 | TSS1500                   | PMPCB        | -3.825±0.4   | -4.11±0.384  | 1.18E-03 |
| cg07475247 | 7 | 102938279 | GeneBody/1st intron       | PMPCB        | -4.595±0.362 | -4.938±0.481 | 9.88E-05 |
| cg27109647 | 7 | 102988186 | GeneBody/1st exon         | PSMC2        | -3.832±0.33  | -4.029±0.413 | 9.20E-03 |
| cg10488185 | 7 | 104654258 | GeneBody/1st exon         | LOC100216545 | -4.06±0.335  | -4.33±0.43   | 6.48E-04 |
| cg05566397 | 7 | 104654900 | GeneBody/5'UTR/1st exon   | KMT2E        | -5.157±0.566 | -5.696±0.687 | 6.67E-05 |
| cg00950418 | 7 | 105029125 | GeneBody                  | SRPK2        | -4.416±0.28  | -4.734±0.378 | 7.40E-06 |
| cg14427173 | 7 | 105172403 | TSS200                    | RINT1        | -3.217±0.426 | -3.461±0.406 | 7.66E-03 |
| cg07461582 | 7 | 105172722 | GeneBody/5'UTR/1st exon   | RINT1        | -4.854±0.368 | -5.069±0.312 | 5.59E-03 |
| cg09382850 | 7 | 105753147 | TSS200                    | SYPL1        | -3.579±0.401 | -3.911±0.459 | 3.31E-04 |
| cg24648061 | 7 | 107114615 | GeneBody                  | GPR22        | 0.976±0.313  | 1.187±0.263  | 1.77E-03 |
| cg26824408 | 7 | 107204412 | GeneBody/1st exon         | DUS4L        | -5.671±0.43  | -5.958±0.426 | 2.29E-03 |
| cg10065130 | 7 | 107204720 | GeneBody/5'UTR/1st exon   | COG5         | -5.163±0.355 | -5.509±0.411 | 4.29E-05 |
| cg23434459 | 7 | 107220583 | GeneBody/5'UTR/1st exon   | BCAP29       | -4.928±0.388 | -5.201±0.326 | 1.08E-03 |
| cg04473302 | 7 | 107301217 | GeneBody/5'UTR/1st exon   | SLC26A4      | -4.466±0.431 | -4.801±0.464 | 5.79E-04 |
| cg03147542 | 7 | 107383881 | TSS1500                   | CBLL1        | -4.611±0.645 | -4.993±0.612 | 5.98E-03 |
| cg03443922 | 7 | 107384711 | GeneBody/1st intron       | CBLL1        | -4.31±0.239  | -4.562±0.376 | 4.78E-05 |
| cg22294577 | 7 | 107444728 | TSS1500                   | SLC26A3      | 2.099±0.263  | 2.257±0.31   | 7.74E-03 |
| cg24937126 | 7 | 107643285 | GeneBody                  | LAMB1        | -4.755±0.427 | -5.104±0.513 | 4.44E-04 |
| cg10064162 | 7 | 107644249 | TSS1500                   | LAMB1        | -2.055±0.272 | -2.268±0.347 | 8.40E-04 |
| cg09834162 | 7 | 108209967 | TSS200                    | THAP5        | -4.401±0.294 | -4.651±0.459 | 7.40E-04 |
| cg02391387 | 7 | 111202222 | GeneBody/5'UTR/1st exon   | IMMP2L       | -5.288±0.493 | -5.699±0.523 | 2.53E-04 |
| cg16218254 | 7 | 111202755 | TSS200                    | IMMP2L       | -3.97±0.219  | -4.192±0.405 | 2.08E-04 |
| cg12733079 | 7 | 111845182 | GeneBody/1st intron       | DOCK4        | -4.428±0.323 | -4.621±0.299 | 5.22E-03 |
| cg24481633 | 7 | 111846146 | GeneBody/1st intron       | DOCK4        | -5.927±0.7   | -6.334±0.597 | 5.97E-03 |
| cg05608188 | 7 | 112430152 | GeneBody/5'UTR/1st intron | TMEM168      | -5.347±0.647 | -5.745±0.546 | 3.70E-03 |
| cg15339605 | 7 | 115670795 | GeneBody/5'UTR/1st exon   | TFEC         | -2.579±0.365 | -2.816±0.41  | 3.73E-03 |
| cg24621354 | 7 | 115850382 | TSS200                    | TES          | -4.217±0.342 | -4.596±0.449 | 9.28E-06 |
| cg00453193 | 7 | 115851050 | GeneBody/1st intron       | TES          | -4.214±0.322 | -4.594±0.443 | 3.91E-06 |
| cg26774312 | 7 | 116139477 | TSS200                    | CAV2         | -4.432±0.352 | -4.809±0.458 | 1.48E-05 |
| cg07964538 | 7 | 116164767 | TSS200                    | CAV1         | -4.844±0.326 | -5.199±0.559 | 4.86E-05 |
| cg27242945 | 7 | 116165134 | GeneBody/5'UTR/1st exon   | CAV1         | -4.484±0.348 | -4.825±0.486 | 7.55E-05 |
| cg04677163 | 7 | 116165941 | TSS1500                   | CAV1         | -3.796±0.247 | -3.997±0.331 | 6.74E-04 |
| cg13155059 | 7 | 116502333 | TSS1500                   | CAPZA2       | -6.605±0.402 | -6.958±0.467 | 4.49E-06 |
| cg05937182 | 7 | 116593656 | GeneBody/1st exon         | ST7          | -4.871±0.402 | -5.323±0.509 | 6.30E-06 |
| cg16540704 | 7 | 117067416 | GeneBody/1st exon         | ASZ1         | 2.619±0.188  | 2.784±0.352  | 1.24E-03 |
| cg05522288 | 7 | 117824098 | GeneBody/5'UTR/1st exon   | NAA38        | -4.632±0.405 | -4.932±0.321 | 5.83E-04 |
| cg02921068 | 7 | 117824282 | GeneBody/1st exon         | NAA38        | -5.444±0.498 | -5.868±0.645 | 3.58E-04 |
| cg12650011 | 7 | 120498280 | TSS200                    | TSPAN12      | -4.453±0.309 | -4.903±0.47  | 1.37E-07 |
| cg11696575 | 7 | 120591325 | GeneBody                  | ING3         | -5.665±0.551 | -6.34±0.527  | 7.41E-07 |
| cg10551759 | 7 | 121036528 | TSS200                    | FAM3C        | -5.668±0.537 | -6.05±0.567  | 1.40E-03 |
| cg14175438 | 7 | 121036729 | TSS1500                   | FAM3C        | -2.526±0.214 | -2.688±0.253 | 1.04E-03 |
| cg19292712 | 7 | 123564194 | TSS1500                   | SPAM1        | 2.405±0.192  | 2.528±0.299  | 9.24E-03 |
| cg23428445 | 7 | 124405467 | GeneBody/5'UTR/1st exon   | GPR37        | -3.712±0.352 | -4.005±0.463 | 4.76E-04 |
| cg09283635 | 7 | 127032512 | GeneBody/5'UTR/1st exon   | ZNF800       | -5.601±0.424 | -6.146±0.614 | 1.20E-06 |
| cg14018807 | 7 | 127225619 | GeneBody/5'UTR/1st exon   | GCC1         | -5.619±0.429 | -6.03±0.56   | 7.94E-05 |
| cg27263448 | 7 | 127637871 | GeneBody/1st exon         | SND1-IT1     | 2.968±0.372  | 3.196±0.34   | 4.25E-03 |
| cg08635249 | 7 | 127983877 | GeneBody/5'UTR/1st exon   | RBM28        | -4.847±0.43  | -5.259±0.525 | 6.18E-05 |
| cg11041966 | 7 | 127983966 | TSS200                    | RBM28        | -5.034±0.371 | -5.287±0.515 | 4.18E-03 |
| cg26083396 | 7 | 128049885 | GeneBody/1st exon         | IMPDH1       | -5.485±0.468 | -5.843±0.824 | 3.57E-03 |
| cg05079794 | 7 | 128050616 | TSS1500                   | IMPDH1       | -3.959±0.237 | -4.113±0.367 | 8.51E-03 |
| cg03080344 | 7 | 128116561 | TSS1500                   | METTL2B      | -4.143±0.37  | -4.438±0.419 | 4.98E-04 |
| cg05590567 | 7 | 128117018 | GeneBody/1st intron       | METTL2B      | -4.087±0.302 | -4.325±0.414 | 1.02E-03 |
| cg07586911 | 7 | 128355717 | GeneBody/1st exon         | FAM71F1      | 2.334±0.21   | 2.506±0.25   | 4.10E-04 |

|            |   |           |                           |            |              |              |          |
|------------|---|-----------|---------------------------|------------|--------------|--------------|----------|
| cg23475963 | 7 | 128379258 | TSS200                    | CALU       | -5.022±0.373 | -5.343±0.487 | 3.26E-04 |
| cg05647526 | 7 | 128379677 | GeneBody/5'UTR/1st intron | CALU       | -4.403±0.42  | -4.822±0.465 | 2.55E-05 |
| cg25664034 | 7 | 128469891 | TSS1500                   | FLNC       | -1.627±0.306 | -1.866±0.291 | 4.37E-04 |
| cg26682717 | 7 | 128503126 | GeneBody/1st intron       | ATP6V1F    | -5.596±0.432 | -5.933±0.454 | 5.43E-04 |
| cg22065500 | 7 | 128695353 | GeneBody/1st exon         | TP1P2      | -5.596±0.418 | -5.844±0.377 | 5.48E-03 |
| cg09916853 | 7 | 128784931 | GeneBody/1st intron       | TSPAN33    | -2.019±0.175 | -2.173±0.288 | 6.67E-04 |
| cg16584911 | 7 | 128864557 | TSS1500                   | AHCYL2     | -2.439±0.184 | -2.646±0.272 | 1.19E-05 |
| cg02841933 | 7 | 129251651 | GeneBody/5'UTR/1st exon   | NRF1       | -5.543±0.512 | -5.94±0.5    | 4.99E-04 |
| cg13360404 | 7 | 129710309 | TSS200                    | KLHDC10    | -5.118±0.369 | -5.57±0.5    | 2.03E-06 |
| cg04894993 | 7 | 129710370 | GeneBody/5'UTR/1st exon   | KLHDC10    | -4.708±0.416 | -4.962±0.508 | 7.42E-03 |
| cg02855426 | 7 | 129984350 | TSS1500                   | CPA5       | 0.407±0.31   | 0.099±0.382  | 3.97E-05 |
| cg13975369 | 7 | 130080553 | GeneBody/1st intron       | CEP41      | -1.339±0.248 | -1.516±0.377 | 3.67E-03 |
| cg05751159 | 7 | 130081017 | GeneBody/5'UTR/1st exon   | CEP41      | -5.422±0.391 | -5.699±0.382 | 1.30E-03 |
| cg13917504 | 7 | 130131258 | GeneBody/5'UTR/1st exon   | MEST       | 0.748±0.125  | 0.854±0.125  | 1.75E-04 |
| cg26702875 | 7 | 130352914 | GeneBody/1st intron       | COPG2      | -4.544±0.315 | -4.806±0.382 | 3.92E-04 |
| cg06422910 | 7 | 130352926 | GeneBody/1st intron       | COPG2      | -4.913±0.539 | -5.275±0.422 | 1.55E-03 |
| cg19023700 | 7 | 131012349 | TSS1500                   | MKLN1      | -4.726±0.429 | -5.083±0.545 | 4.26E-04 |
| cg16488098 | 7 | 131240440 | GeneBody/1st intron       | PODXL      | -3.691±0.405 | -4.036±0.426 | 1.84E-04 |
| cg00186141 | 7 | 131241768 | TSS1500                   | PODXL      | -5.18±0.348  | -5.413±0.404 | 3.05E-03 |
| cg19632026 | 7 | 132766999 | TSS200                    | CHCHD3     | -5.376±0.441 | -5.655±0.377 | 3.02E-03 |
| cg20451802 | 7 | 132937811 | TSS200                    | EXOC4      | -4.41±0.318  | -4.694±0.304 | 8.12E-05 |
| cg10839521 | 7 | 133811911 | TSS200                    | LRGUK      | -4.47±0.339  | -4.719±0.378 | 1.14E-03 |
| cg22063653 | 7 | 134331376 | TSS200                    | BPGM       | -5.026±0.477 | -5.479±0.451 | 3.65E-05 |
| cg05680424 | 7 | 134331560 | GeneBody/5'UTR/1st exon   | BPGM       | -3.82±0.279  | -4.08±0.402  | 1.74E-04 |
| cg04619859 | 7 | 134855396 | TSS200                    | C7orf49    | -5.332±0.494 | -6.097±0.68  | 2.22E-08 |
| cg00059740 | 7 | 134855689 | TSS200                    | C7orf49    | -5.492±0.485 | -5.833±0.436 | 1.19E-03 |
| cg18152517 | 7 | 134915756 | TSS1500                   | STRA8      | 2.257±0.21   | 2.406±0.261  | 2.26E-03 |
| cg03266904 | 7 | 135194685 | GeneBody/5'UTR/1st exon   | CNOT4      | -5.632±0.555 | -6.2±0.542   | 1.28E-05 |
| cg06145308 | 7 | 135195101 | TSS1500                   | CNOT4      | -4.664±0.307 | -4.855±0.303 | 4.31E-03 |
| cg00973677 | 7 | 136553595 | GeneBody/5'UTR/1st exon   | CHRM2      | -5.182±0.358 | -5.474±0.457 | 5.70E-04 |
| cg08434234 | 7 | 137531173 | GeneBody/1st intron       | DGKI       | -4.558±0.504 | -4.889±0.569 | 3.44E-03 |
| cg24251035 | 7 | 138721065 | TSS1500                   | ZC3HAV1L   | -1.569±0.207 | -1.446±0.216 | 7.01E-03 |
| cg08222662 | 7 | 138794752 | TSS1500                   | ZC3HAV1    | -3.726±0.566 | -4.123±0.535 | 1.34E-03 |
| cg18015677 | 7 | 138818325 | TSS200                    | TTC26      | -4.887±0.432 | -5.176±0.466 | 2.68E-03 |
| cg05284724 | 7 | 138818658 | GeneBody/1st intron       | TTC26      | -4.69±0.216  | -4.923±0.284 | 1.38E-05 |
| cg12917695 | 7 | 139025159 | TSS200                    | C7orf55    | -5.967±0.599 | -6.43±0.593  | 5.30E-04 |
| cg07050831 | 7 | 139025240 | GeneBody/1st exon         | C7orf55    | -3.279±0.237 | -3.46±0.322  | 1.36E-03 |
| cg11609154 | 7 | 139026010 | GeneBody/5'UTR/1st exon   | C7orf55    | -4.383±0.481 | -4.713±0.613 | 3.11E-03 |
| cg17177336 | 7 | 139026384 | GeneBody/1st intron       | C7orf55    | -3.569±0.26  | -3.754±0.379 | 3.38E-03 |
| cg09848074 | 7 | 139172610 | 0                         | 0          | -0.348±0.234 | -0.637±0.34  | 2.52E-06 |
| cg14116596 | 7 | 139528673 | TSS1500                   | TBXAS1     | 1.146±0.267  | 1.302±0.268  | 7.09E-03 |
| cg24435704 | 7 | 139763773 | TSS1500                   | PARP12     | 3.065±0.305  | 3.314±0.334  | 3.64E-04 |
| cg15002187 | 7 | 140098492 | TSS200                    | SLC37A3    | -3.862±0.348 | -4.135±0.407 | 6.75E-04 |
| cg23411876 | 7 | 140396886 | TSS200                    | NDUFB2-AS1 | -4.75±0.49   | -5.22±0.561  | 4.86E-05 |
| cg17095753 | 7 | 140623924 | GeneBody/1st intron       | BRAF       | -5.163±0.453 | -5.689±0.75  | 1.43E-05 |
| cg23066879 | 7 | 140624057 | GeneBody/1st intron       | BRAF       | -4.442±0.355 | -4.82±0.492  | 2.16E-05 |
| cg11414046 | 7 | 140624194 | GeneBody/1st intron       | BRAF       | -5.428±0.69  | -6.036±0.639 | 9.40E-05 |
| cg14094063 | 7 | 140624470 | GeneBody/1st exon         | BRAF       | -5.883±0.583 | -6.406±0.582 | 8.65E-05 |
| cg03148461 | 7 | 140625066 | TSS1500                   | BRAF       | -3.571±0.604 | -4.09±0.515  | 1.12E-04 |
| cg00338893 | 7 | 140714614 | TSS200                    | MRPS33     | -4.272±0.5   | -4.585±0.587 | 5.60E-03 |
| cg18384643 | 7 | 140715001 | TSS1500                   | MRPS33     | -3.328±0.332 | -3.113±0.46  | 6.49E-03 |
| cg26449836 | 7 | 141438150 | GeneBody/5'UTR/1st exon   | SSBP1      | -4.808±0.422 | -5.118±0.485 | 1.25E-03 |
| cg24980583 | 7 | 141438448 | GeneBody/5'UTR/1st exon   | SSBP1      | -4.629±0.358 | -4.879±0.452 | 2.66E-03 |
| cg06244634 | 7 | 141477998 | TSS1500                   | TAS2R4     | 1.826±0.299  | 2.007±0.238  | 3.85E-03 |
| cg25481253 | 7 | 141673384 | GeneBody/1st exon         | TAS2R38    | -1.088±0.277 | -1.293±0.343 | 1.48E-03 |
| cg18971054 | 7 | 141695759 | GeneBody/5'UTR/1st intron | MGAM       | 2.16±0.274   | 2.322±0.298  | 7.45E-03 |
| cg22298208 | 7 | 142635611 | TSS1500                   | C7orf34    | 3.193±0.156  | 3.284±0.186  | 9.71E-03 |
| cg15542496 | 7 | 142828356 | TSS1500                   | PIP        | 2.454±0.215  | 2.627±0.269  | 6.17E-04 |
| cg17524624 | 7 | 142960387 | TSS200                    | GSTK1      | -3.63±0.502  | -4.076±0.414 | 7.12E-05 |
| cg03311036 | 7 | 142985443 | GeneBody/5'UTR/1st exon   | CASP2      | -4.635±0.388 | -4.924±0.476 | 1.28E-03 |
| cg25946952 | 7 | 143059218 | TSS200                    | FAM131B    | -2.854±0.298 | -2.626±0.418 | 1.48E-03 |
| cg19548738 | 7 | 143598702 | GeneBody/5'UTR/1st intron | FAM115A    | -4.41±0.445  | -4.683±0.473 | 5.34E-03 |
| cg23815845 | 7 | 144052025 | TSS1500                   | ARHGEF5    | -4.017±0.332 | -4.27±0.447  | 1.36E-03 |
| cg06979034 | 7 | 144052048 | TSS1500                   | ARHGEF5    | -3.501±0.31  | -3.745±0.418 | 1.00E-03 |
| cg19714749 | 7 | 144533092 | GeneBody/5'UTR/1st exon   | TPK1       | -4.942±0.383 | -5.188±0.47  | 5.21E-03 |
| cg01204439 | 7 | 144533322 | TSS200                    | TPK1       | -3.238±0.296 | -3.469±0.343 | 6.82E-04 |
| cg11681073 | 7 | 148396137 | GeneBody/5'UTR/1st intron | CUL1       | -4.959±0.512 | -5.446±0.381 | 2.44E-05 |
| cg10128868 | 7 | 148725440 | GeneBody/1st exon         | PDIA4      | -4.237±0.309 | -4.575±0.396 | 1.03E-05 |
| cg00006414 | 7 | 148822837 | GeneBody/1st intron       | ZNF425     | -4.325±0.566 | -4.721±0.639 | 1.92E-03 |
| cg26024206 | 7 | 148892367 | TSS1500                   | ZNF282     | -4.509±0.302 | -4.817±0.344 | 1.93E-05 |
| cg10162464 | 7 | 148892662 | GeneBody/5'UTR/1st exon   | ZNF282     | -3.344±0.187 | -3.203±0.286 | 2.39E-03 |
| cg14820798 | 7 | 149321188 | GeneBody/1st intron       | ZNF767     | -3.696±0.202 | -3.816±0.211 | 6.41E-03 |
| cg02372712 | 7 | 149470295 | GeneBody/5'UTR/1st exon   | ZNF467     | -2.069±0.143 | -2.18±0.22   | 1.82E-03 |
| cg23749760 | 7 | 149471044 | TSS1500                   | ZNF467     | -2.616±0.385 | -2.874±0.469 | 3.46E-03 |
| cg02902770 | 7 | 150039406 | TSS1500                   | RARRES2    | 2.035±0.218  | 2.216±0.248  | 3.31E-04 |
| cg21784940 | 7 | 150067807 | TSS1500                   | REPIN1     | 0.384±0.345  | 0.128±0.358  | 8.92E-04 |
| cg01827098 | 7 | 150211152 | TSS1500                   | GIMAP7     | 2.209±0.355  | 2.463±0.446  | 1.95E-03 |
| cg00323915 | 7 | 150264987 | GeneBody/5'UTR/1st intron | GIMAP4     | -0.907±0.274 | -1.073±0.338 | 8.24E-03 |
| cg25918245 | 7 | 150382724 | TSS200                    | GIMAP2     | -3.625±0.524 | -3.911±0.458 | 9.97E-03 |
| cg12914657 | 7 | 150413680 | GeneBody/5'UTR/1st exon   | GIMAP1     | -2.47±0.232  | -2.796±0.413 | 8.61E-07 |
| cg13043509 | 7 | 150434452 | GeneBody/5'UTR/1st exon   | GIMAP5     | -1.412±0.306 | -1.636±0.403 | 1.81E-03 |
| cg07897701 | 7 | 150549370 | TSS200                    | AOC1       | 0.859±0.226  | 0.995±0.289  | 9.09E-03 |
| cg03842617 | 7 | 150688556 | GeneBody/5'UTR/1st intron | NOS3       | 2.536±0.245  | 2.744±0.385  | 7.76E-04 |
| cg20456055 | 7 | 150725256 | TSS1500                   | ABCB8      | -5.044±0.451 | -5.453±0.369 | 5.33E-05 |
| cg01177956 | 7 | 150756509 | TSS200                    | SLC4A2     | -4.354±0.344 | -4.589±0.468 | 3.95E-03 |
| cg01685739 | 7 | 150756773 | GeneBody/5'UTR/1st exon   | SLC4A2     | -4.493±0.447 | -4.91±0.625  | 1.52E-04 |
| cg00367438 | 7 | 150780797 | TSS200                    | TMUB1      | -4.235±0.467 | -4.493±0.424 | 9.72E-03 |
| cg17541425 | 7 | 150924535 | TSS1500                   | ABCF2      | -4.592±0.27  | -4.792±0.254 | 7.66E-04 |
| cg14795305 | 7 | 150974453 | TSS1500                   | SMARCD3    | -4.38±0.417  | -4.684±0.537 | 1.79E-03 |
| cg22830895 | 7 | 151137476 | TSS1500                   | CRYGN      | -1.228±0.316 | -1.42±0.26   | 4.03E-03 |
| cg03998173 | 7 | 151217580 | TSS1500                   | RHEB       | -4.799±0.61  | -5.2±0.557   | 2.32E-03 |
| cg25786436 | 7 | 151573913 | TSS1500                   | PRKAG2-AS1 | -5.208±0.373 | -5.675±0.58  | 2.91E-06 |
| cg06161738 | 7 | 151722986 | GeneBody/5'UTR/1st intron | GALNT11    | -5.21±0.456  | -5.668±0.672 | 6.95E-05 |
| cg11096640 | 7 | 152457432 | GeneBody/1st intron       | ACTR3B     | -4.774±0.262 | -5.231±0.441 | 8.54E-09 |
| cg17927917 | 7 | 155089006 | TSS1500                   | INSIG1     | -5.497±0.388 | -5.917±0.698 | 7.32E-05 |

|            |   |           |                           |           |              |              |          |
|------------|---|-----------|---------------------------|-----------|--------------|--------------|----------|
| cg11648289 | 7 | 155249674 | TSS1500                   | EN2       | -4.534±0.347 | -4.894±0.43  | 2.11E-05 |
| cg00577464 | 7 | 155604780 | GeneBody/1st exon         | SHH       | -4.49±0.374  | -4.711±0.429 | 8.12E-03 |
| cg25167838 | 7 | 155605092 | TSS200                    | SHH       | -5.415±0.562 | -5.84±0.63   | 8.57E-04 |
| cg17536848 | 7 | 156866555 | TSS1500                   | LMBR1     | -3.014±0.272 | -3.228±0.408 | 1.42E-03 |
| cg20420433 | 7 | 156804561 | GeneBody/1st intron       | LOC645249 | -4.377±0.306 | -4.577±0.36  | 4.04E-03 |
| cg13456653 | 7 | 157130065 | GeneBody/5'UTR/1st intron | DNAJB6    | -4.381±0.49  | -4.752±0.463 | 5.84E-04 |
| cg22889570 | 8 | 182684    | GeneBody/5'UTR/1st exon   | ZNF596    | -5.122±0.484 | -5.526±0.598 | 3.80E-04 |
| cg09664442 | 8 | 681122    | GeneBody/1st intron       | ERICH1    | -5.609±0.485 | -6.244±0.66  | 6.55E-07 |
| cg25214366 | 8 | 7287673   | GeneBody/5'UTR/1st exon   | DEFB103B  | 1.431±0.201  | 1.557±0.285  | 8.64E-03 |
| cg02658251 | 8 | 7751366   | TSS1500                   | DEFB4A    | 1.288±0.163  | 1.43±0.269   | 7.32E-04 |
| cg25232934 | 8 | 8860211   | TSS200                    | ERI1      | -4.117±0.388 | -4.367±0.571 | 7.77E-03 |
| cg01092561 | 8 | 9008681   | TSS1500                   | PPP1R3B   | -4.694±0.311 | -5.057±0.451 | 6.43E-06 |
| cg07962051 | 8 | 9412923   | TSS1500                   | TNKS      | -3.372±0.482 | -3.783±0.49  | 1.76E-04 |
| cg04228628 | 8 | 9413457   | GeneBody/1st exon         | TNKS      | -5.388±0.408 | -5.812±0.633 | 5.55E-05 |
| cg18452600 | 8 | 9911543   | TSS1500                   | MSRA      | -3.654±0.376 | -3.409±0.417 | 3.43E-03 |
| cg11108432 | 8 | 10697698  | TSS1500                   | PINX1     | -4.708±0.343 | -5.004±0.488 | 4.38E-04 |
| cg11434468 | 8 | 11059277  | TSS1500                   | XKR6      | -5.096±0.328 | -5.528±0.44  | 6.01E-07 |
| cg20951726 | 8 | 11142737  | GeneBody/1st intron       | MTMR9     | -4.089±0.246 | -4.328±0.382 | 1.39E-04 |
| cg24505375 | 8 | 11188774  | GeneBody/1st exon         | SLC35G5   | 0.927±0.272  | 1.167±0.34   | 2.01E-04 |
| cg23045373 | 8 | 11324048  | GeneBody/5'UTR/1st intron | FAM167A   | -5.329±0.314 | -5.891±0.703 | 6.46E-08 |
| cg20717059 | 8 | 11324817  | TSS1500                   | FAM167A   | -4.698±0.379 | -5.005±0.317 | 2.36E-04 |
| cg10866709 | 8 | 11561361  | TSS1500                   | GATA4     | -3.311±0.211 | -3.462±0.271 | 2.24E-03 |
| cg00873037 | 8 | 11626984  | TSS200                    | NEIL2     | -4.771±0.584 | -5.195±0.61  | 1.12E-03 |
| cg14329976 | 8 | 11627812  | GeneBody/5'UTR            | NEIL2     | -3.746±0.263 | -3.949±0.368 | 1.32E-03 |
| cg21281001 | 8 | 11725306  | GeneBody/5'UTR/1st intron | CTSB      | -5.187±0.603 | -4.82±0.619  | 5.44E-03 |
| cg18787975 | 8 | 11726094  | TSS1500                   | CTSB      | -3.758±0.276 | -3.918±0.266 | 7.46E-03 |
| cg00825031 | 8 | 17104503  | GeneBody/5'UTR/1st exon   | VPS37A    | -5.77±0.46   | -6.251±0.573 | 1.85E-05 |
| cg22807551 | 8 | 17659378  | TSS1500                   | MTUS1     | -3.549±0.304 | -3.796±0.434 | 8.66E-04 |
| cg11050116 | 8 | 17780536  | GeneBody/5'UTR/1st exon   | PCM1      | -5.597±0.561 | -6.034±0.578 | 5.33E-04 |
| cg17044611 | 8 | 17942239  | GeneBody/1st exon         | ASAH1     | -5.271±0.492 | -5.652±0.494 | 5.37E-04 |
| cg13563405 | 8 | 17942526  | TSS200                    | ASAH1     | -4.936±0.458 | -5.278±0.486 | 8.67E-04 |
| cg09537031 | 8 | 19171706  | GeneBody/5'UTR/1st intron | SH2D4A    | -4.487±0.434 | -4.775±0.527 | 3.75E-03 |
| cg17834443 | 8 | 19674713  | TSS1500                   | INTS10    | -5.25±0.6    | -5.631±0.499 | 2.79E-03 |
| cg01952458 | 8 | 20054547  | TSS200                    | ATP6V1B2  | -4.648±0.395 | -5.083±0.503 | 9.29E-06 |
| cg11856918 | 8 | 20054956  | GeneBody/1st exon         | ATP6V1B2  | -5.653±0.708 | -6.308±0.624 | 4.58E-05 |
| cg09950370 | 8 | 21609373  | GeneBody                  | GFR2      | 2.89±0.219   | 3.029±0.269  | 5.51E-03 |
| cg03732056 | 8 | 21771059  | GeneBody/1st exon         | DOK2      | -1.292±0.245 | -1.445±0.351 | 9.58E-03 |
| cg26411702 | 8 | 21881998  | TSS1500                   | NPM2      | -3.92±0.364  | -4.181±0.404 | 1.45E-03 |
| cg10194829 | 8 | 21900177  | TSS1500                   | FGF17     | -2.374±0.277 | -2.107±0.414 | 1.31E-04 |
| cg13958676 | 8 | 22014652  | TSS1500                   | LGI3      | -4.602±0.417 | -4.99±0.396  | 4.86E-05 |
| cg07242414 | 8 | 22021845  | TSS1500                   | BMP1      | -3.667±0.258 | -3.933±0.379 | 4.73E-05 |
| cg06333435 | 8 | 22102724  | GeneBody/5'UTR/1st intron | POLR3D    | -5.958±0.573 | -6.563±0.66  | 1.20E-05 |
| cg07837262 | 8 | 22225395  | GeneBody/5'UTR/1st intron | SLC39A14  | -5.494±0.471 | -5.819±0.488 | 1.83E-03 |
| cg02640558 | 8 | 22299141  | GeneBody/1st intron       | PPP3CC    | -5.457±0.45  | -5.724±0.41  | 5.48E-03 |
| cg09476523 | 8 | 22856635  | TSS1500                   | RHOBTB2   | -5.378±0.566 | -5.791±0.491 | 7.80E-04 |
| cg04447123 | 8 | 22857672  | GeneBody/5'UTR/1st intron | RHOBTB2   | -5.429±0.53  | -5.889±0.555 | 1.48E-04 |
| cg02008544 | 8 | 22926600  | GeneBody/5'UTR/1st exon   | TNFRSF10B | -4.73±0.375  | -4.965±0.398 | 4.47E-03 |
| cg16861508 | 8 | 22926909  | TSS1500                   | TNFRSF10B | -5.395±0.441 | -5.761±0.397 | 1.87E-04 |
| cg23051664 | 8 | 23020966  | GeneBody/1st intron       | TNFRSF10D | -3.849±0.231 | -4.112±0.438 | 5.04E-05 |
| cg10245048 | 8 | 23082569  | GeneBody/1st exon         | TNFRSF10A | -4.324±0.33  | -4.543±0.337 | 2.56E-03 |
| cg03664800 | 8 | 23261312  | GeneBody/5'UTR/1st intron | LOXL2     | -4.1±0.369   | -3.763±0.568 | 3.01E-04 |
| cg25944700 | 8 | 23386623  | GeneBody/1st exon         | SLC25A37  | -5.436±0.383 | -5.842±0.576 | 3.55E-05 |
| cg13266631 | 8 | 24815006  | TSS1500                   | NEFL      | -3.123±0.302 | -2.915±0.329 | 1.99E-03 |
| cg25192419 | 8 | 25042348  | GeneBody/5'UTR/1st exon   | DOCK5     | -5.308±0.601 | -5.694±0.864 | 7.55E-03 |
| cg21305265 | 8 | 25316571  | GeneBody/5'UTR/1st exon   | CDCA2     | -4.827±0.364 | -5.059±0.357 | 3.43E-03 |
| cg10207787 | 8 | 26148195  | TSS1500                   | PPP2R2A   | 2.887±0.147  | 2.991±0.197  | 2.79E-03 |
| cg05232067 | 8 | 26240888  | GeneBody/1st intron       | BNIP3L    | -4.047±0.263 | -4.308±0.354 | 5.64E-05 |
| cg10368981 | 8 | 26435313  | TSS200                    | DPYSL2    | -5.695±0.595 | -6.147±0.548 | 5.51E-04 |
| cg01214321 | 8 | 26435429  | GeneBody/5'UTR/1st exon   | DPYSL2    | -5.672±0.518 | -6.093±0.505 | 2.89E-04 |
| cg25762706 | 8 | 27115867  | GeneBody/5'UTR/1st exon   | STMN4     | 1.143±0.29   | 1.318±0.308  | 6.15E-03 |
| cg21099326 | 8 | 27168591  | GeneBody/1st exon         | TRIM35    | -5.834±0.61  | -6.286±0.601 | 8.24E-04 |
| cg21443261 | 8 | 27169256  | GeneBody/5'UTR/1st intron | PTK2B     | -4.82±0.355  | -5.197±0.327 | 8.70E-06 |
| cg04953015 | 8 | 27338236  | TSS1500                   | CHRNA2    | 2.078±0.185  | 2.213±0.28   | 3.07E-03 |
| cg04929736 | 8 | 27472395  | TSS200                    | CLU       | -4.433±0.322 | -4.631±0.292 | 4.09E-03 |
| cg08773844 | 8 | 27630019  | GeneBody/1st intron       | CCDC25    | -5.342±0.464 | -5.741±0.46  | 1.46E-04 |
| cg13467469 | 8 | 27630342  | TSS200                    | CCDC25    | -4.574±0.44  | -4.846±0.424 | 4.25E-03 |
| cg18249244 | 8 | 27950725  | GeneBody/5'UTR/1st exon   | ELP3      | -5.222±0.658 | -5.827±0.639 | 5.88E-05 |
| cg05026033 | 8 | 27950972  | GeneBody/1st intron       | ELP3      | -3.476±0.281 | -3.702±0.428 | 1.19E-03 |
| cg19139277 | 8 | 28243953  | GeneBody/5'UTR/1st exon   | ZNF395    | -5.289±0.547 | -5.706±0.564 | 6.67E-04 |
| cg16729690 | 8 | 28351217  | TSS1500                   | FZD3      | -3.942±0.427 | -4.242±0.437 | 1.50E-03 |
| cg01124961 | 8 | 28747453  | TSS200                    | INTS9     | -4.122±0.259 | -4.359±0.453 | 5.65E-04 |
| cg07267296 | 8 | 28748995  | GeneBody/5'UTR/1st intron | HMBOX1    | -3.918±0.217 | -4.081±0.351 | 3.01E-03 |
| cg10220156 | 8 | 29120487  | GeneBody/1st intron       | KIF13B    | -4.541±0.396 | -4.843±0.655 | 2.92E-03 |
| cg13983578 | 8 | 29208153  | GeneBody/5'UTR/1st exon   | DUSP4     | -5.48±0.606  | -5.829±0.476 | 5.86E-03 |
| cg19691797 | 8 | 29939998  | GeneBody/1st intron       | TMEM66    | -5.093±0.403 | -5.356±0.528 | 5.15E-03 |
| cg00177923 | 8 | 29952655  | TSS1500                   | LEPROTL1  | -5.407±0.567 | -5.851±0.515 | 3.95E-04 |
| cg18986713 | 8 | 29953064  | GeneBody/1st exon         | LEPROTL1  | -5.266±0.352 | -5.549±0.376 | 3.94E-04 |
| cg08887137 | 8 | 30013701  | TSS200                    | DCTN6     | -5.154±0.372 | -5.468±0.315 | 1.42E-04 |
| cg15319076 | 8 | 30013987  | GeneBody/1st intron       | DCTN6     | -5.004±0.314 | -5.36±0.32   | 2.91E-06 |
| cg14871856 | 8 | 30515337  | GeneBody/5'UTR/1st intron | GTF2E2    | -5.486±0.451 | -5.889±0.541 | 1.49E-04 |
| cg18356330 | 8 | 30515990  | TSS1500                   | GTF2E2    | -4.94±0.444  | -5.461±0.622 | 4.97E-06 |
| cg07899425 | 8 | 30585046  | GeneBody/1st exon         | GSR       | -4.908±0.453 | -5.271±0.531 | 5.23E-04 |
| cg25948993 | 8 | 30601878  | GeneBody/1st intron       | UBXN8     | -4.913±0.371 | -5.193±0.533 | 1.83E-03 |
| cg23610841 | 8 | 30669848  | GeneBody/1st exon         | PPP2CB    | -5.641±0.698 | -6.326±0.712 | 2.67E-05 |
| cg19418958 | 8 | 30705886  | GeneBody/1st exon         | TEX15     | -0.216±0.255 | -0.416±0.269 | 5.10E-04 |
| cg10709021 | 8 | 30890108  | GeneBody/1st exon         | PURG      | -1.529±0.215 | -1.704±0.324 | 1.02E-03 |
| cg23610841 | 8 | 30891077  | GeneBody/5'UTR/1st exon   | PURG      | -2.28±0.107  | -2.377±0.233 | 2.22E-03 |
| cg04833152 | 8 | 30891510  | TSS1500                   | PURG      | -4.135±0.418 | -4.55±0.438  | 2.45E-05 |
| cg20349695 | 8 | 33330484  | GeneBody/5'UTR/1st intron | FUT10     | -4.638±0.317 | -5.045±0.45  | 1.10E-06 |
| cg03594044 | 8 | 33330726  | TSS200                    | FUT10     | -5.362±0.479 | -5.73±0.412  | 4.38E-04 |
| cg23663332 | 8 | 33341954  | TSS1500                   | MAK16     | 1.033±0.179  | 1.154±0.207  | 2.74E-03 |
| cg00792687 | 8 | 33370099  | GeneBody/1st exon         | TTI2      | -4.507±0.461 | -4.781±0.407 | 5.19E-03 |
| cg25781202 | 8 | 33424350  | GeneBody/5'UTR/1st exon   | RNF122    | -5.16±0.399  | -5.441±0.446 | 1.75E-03 |
| cg09904573 | 8 | 33424809  | TSS200                    | RNF122    | -4.391±0.412 | -4.661±0.506 | 4.29E-03 |
| cg25738273 | 8 | 33457336  | GeneBody/5'UTR/1st exon   | DUSP26    | -4.061±0.411 | -4.321±0.46  | 4.67E-03 |

|            |   |          |                           |              |              |              |          |
|------------|---|----------|---------------------------|--------------|--------------|--------------|----------|
| cg04553559 | 8 | 37552657 | TSS1500                   | ZNF703       | -4.012±0.294 | -4.203±0.289 | 2.87E-03 |
| cg18379495 | 8 | 37553668 | GeneBody/1st exon         | ZNF703       | -3.623±0.417 | -3.243±0.47  | 9.59E-05 |
| cg09478597 | 8 | 37594596 | GeneBody/5'UTR/1st intron | ERLIN2       | -6.016±0.675 | -6.644±0.626 | 4.59E-05 |
| cg22838674 | 8 | 37619818 | TSS1500                   | PROSC        | -5.481±0.466 | -5.748±0.44  | 7.75E-03 |
| cg16313587 | 8 | 37707285 | GeneBody/1st exon         | BRF2         | -4.814±0.479 | -5.114±0.463 | 3.86E-03 |
| cg25500285 | 8 | 37888493 | GeneBody/1st intron       | EIF4EBP1     | -4.437±0.428 | -4.701±0.401 | 4.23E-03 |
| cg24318412 | 8 | 37962972 | TSS200                    | ASH2L        | -5.759±0.594 | -6.199±0.558 | 7.47E-04 |
| cg09630404 | 8 | 38008543 | GeneBody/5'UTR/1st exon   | STAR         | -4.073±0.326 | -4.359±0.456 | 3.47E-04 |
| cg11360768 | 8 | 38239777 | GeneBody/5'UTR/1st exon   | WHSC1L1      | -6.028±0.563 | -6.563±0.674 | 6.49E-05 |
| cg25510610 | 8 | 38240894 | TSS1500                   | WHSC1L1      | -4.108±0.351 | -4.418±0.502 | 3.35E-04 |
| cg09990086 | 8 | 38643846 | TSS1500                   | TACC1        | 2.358±0.178  | 2.495±0.208  | 8.22E-04 |
| cg04017769 | 8 | 38644939 | GeneBody/5'UTR/1st exon   | TACC1        | -6.052±0.57  | -6.77±0.68   | 7.80E-07 |
| cg16652639 | 8 | 38853854 | GeneBody/5'UTR/1st exon   | TM2D2        | -4.552±0.336 | -4.769±0.364 | 3.59E-03 |
| cg11251498 | 8 | 39792769 | GeneBody/1st intron       | IDO2         | -1.011±0.359 | -1.315±0.413 | 2.61E-04 |
| cg14435640 | 8 | 41436176 | GeneBody/5'UTR/1st intron | AGPAT6       | -5.025±0.458 | -5.483±0.471 | 2.00E-05 |
| cg03380773 | 8 | 41504331 | GeneBody/1st intron       | NKX6-3       | -4.913±0.356 | -5.246±0.516 | 1.65E-04 |
| cg12468056 | 8 | 41909961 | TSS1500                   | KAT6A        | -4.97±0.346  | -5.182±0.374 | 5.52E-03 |
| cg07490776 | 8 | 42010169 | TSS1500                   | AP3M2        | -6.013±0.648 | -6.728±0.696 | 5.17E-06 |
| cg16060664 | 8 | 42010866 | GeneBody/5'UTR/1st intron | AP3M2        | -6.045±0.407 | -6.355±0.496 | 9.95E-04 |
| cg22960501 | 8 | 42128498 | TSS1500                   | IKBK         | -5.379±0.656 | -5.923±0.558 | 1.75E-04 |
| cg04223844 | 8 | 42128868 | GeneBody/5'UTR/1st exon   | IKBK         | -4.573±0.544 | -4.973±0.533 | 8.90E-04 |
| cg20264731 | 8 | 42195644 | TSS1500                   | POLB         | -4.299±0.529 | -4.707±0.514 | 5.35E-04 |
| cg11415932 | 8 | 42196139 | GeneBody/5'UTR/1st exon   | POLB         | -4.728±0.214 | -4.876±0.222 | 1.83E-03 |
| cg21209091 | 8 | 42234975 | TSS1500                   | DKK4         | -1.629±0.266 | -1.886±0.404 | 1.33E-04 |
| cg18381880 | 8 | 42249569 | GeneBody/5'UTR/1st intron | VDAC3        | -5.85±0.524  | -6.312±0.604 | 1.56E-04 |
| cg14408969 | 8 | 42396118 | TSS200                    | SMIM19       | -4.388±0.232 | -4.676±0.314 | 1.58E-06 |
| cg02450959 | 8 | 42698393 | GeneBody/5'UTR/1st exon   | THAP1        | -4.555±0.426 | -4.955±0.505 | 7.31E-05 |
| cg27043582 | 8 | 42752981 | GeneBody/1st intron       | HOOX3        | -3.447±0.458 | -3.711±0.514 | 9.67E-03 |
| cg02617361 | 8 | 42911308 | TSS200                    | FNTA         | -6.098±0.615 | -6.489±0.586 | 3.32E-03 |
| cg25861458 | 8 | 42948482 | TSS200                    | SGK196       | -4.556±0.354 | -4.779±0.478 | 7.34E-03 |
| cg16241714 | 8 | 48650511 | GeneBody/1st exon         | CEBPD        | -5.647±0.641 | -6.206±0.671 | 1.40E-04 |
| cg24792272 | 8 | 48873190 | GeneBody/5'UTR/1st exon   | MCM4         | -4.022±0.432 | -4.493±0.558 | 1.09E-05 |
| cg16104446 | 8 | 48873951 | GeneBody/1st intron       | MCM4         | -2.813±0.165 | -2.95±0.287  | 1.56E-03 |
| cg04229238 | 8 | 53627628 | TSS1500                   | RB1CC1       | -4.053±0.465 | -4.562±0.603 | 1.05E-05 |
| cg07629017 | 8 | 53851613 | TSS1500                   | NPBWR1       | -3.764±0.353 | -3.995±0.343 | 2.68E-03 |
| cg02115041 | 8 | 53852101 | TSS1500                   | NPBWR1       | -3.035±0.343 | -3.364±0.43  | 6.70E-05 |
| cg11050527 | 8 | 54755511 | GeneBody/5'UTR/1st exon   | ATP6V1H      | -3.92±0.21   | -4.19±0.345  | 2.52E-06 |
| cg06557606 | 8 | 54756224 | TSS1500                   | ATP6V1H      | -3.783±0.482 | -4.295±0.488 | 7.84E-06 |
| cg00582628 | 8 | 54764515 | GeneBody/1st exon         | RGS20        | -2.183±0.207 | -2.361±0.315 | 5.67E-04 |
| cg01677098 | 8 | 54935025 | TSS200                    | TCEA1        | -5.702±0.684 | -6.361±0.695 | 3.43E-05 |
| cg10644878 | 8 | 55014388 | GeneBody/5'UTR/1st exon   | LYPLA1       | -0.414±0.16  | -0.524±0.191 | 2.74E-03 |
| cg01334437 | 8 | 55014655 | TSS200                    | LYPLA1       | -4.906±0.616 | -5.382±0.559 | 4.41E-04 |
| cg16889368 | 8 | 55047599 | TSS200                    | MRPL15       | -4.115±0.405 | -4.42±0.563  | 1.70E-03 |
| cg10453040 | 8 | 56685352 | TSS1500                   | TGS1         | -3.037±0.269 | -2.853±0.317 | 2.74E-03 |
| cg10485472 | 8 | 56686346 | TSS1500                   | TMEM68       | -4.446±0.426 | -4.783±0.53  | 7.13E-04 |
| cg10539712 | 8 | 56792571 | GeneBody/5'UTR/1st exon   | LYN          | -3.677±0.319 | -3.981±0.561 | 3.53E-04 |
| cg03718026 | 8 | 56987420 | TSS1500                   | RPS20        | -3.53±0.339  | -3.724±0.325 | 7.73E-03 |
| cg11321895 | 8 | 57123832 | GeneBody/5'UTR/1st exon   | PLAG1        | -4.356±0.261 | -4.502±0.249 | 9.41E-03 |
| cg13208732 | 8 | 57124347 | GeneBody/5'UTR/1st exon   | CHCHD7       | -5.879±0.393 | -6.328±0.602 | 1.19E-05 |
| cg13573276 | 8 | 57232898 | GeneBody/5'UTR/1st exon   | SDR16C5      | -3.137±0.412 | -3.408±0.495 | 3.91E-03 |
| cg11550426 | 8 | 59465609 | TSS200                    | SDCBP        | -4.879±0.32  | -5.102±0.418 | 2.89E-03 |
| cg20239949 | 8 | 59572638 | TSS1500                   | NSMAF        | -4.179±0.325 | -4.416±0.424 | 1.88E-03 |
| cg23616377 | 8 | 61194516 | TSS1500                   | CA8          | -4.126±0.449 | -4.439±0.535 | 2.29E-03 |
| cg01405761 | 8 | 62200689 | GeneBody/5'UTR/1st exon   | CLVS1        | -2.991±0.402 | -3.254±0.519 | 4.91E-03 |
| cg04333463 | 8 | 62626687 | GeneBody/1st intron       | ASPH         | -4.221±0.7   | -4.691±0.67  | 2.06E-03 |
| cg06619076 | 8 | 62627042 | GeneBody/5'UTR/1st exon   | ASPH         | -3.869±0.284 | -4.063±0.382 | 3.74E-03 |
| cg23687960 | 8 | 63951868 | TSS1500                   | GGH          | -5.345±0.352 | -5.682±0.56  | 1.88E-04 |
| cg07448460 | 8 | 63951879 | TSS1500                   | GGH          | -4.125±0.331 | -4.405±0.401 | 3.14E-04 |
| cg23602533 | 8 | 63998164 | GeneBody/1st intron       | TTPA         | -3.541±0.324 | -3.817±0.478 | 5.58E-04 |
| cg14817143 | 8 | 63998778 | TSS200                    | TTPA         | -3.951±0.246 | -4.111±0.377 | 8.28E-03 |
| cg13398993 | 8 | 66546079 | GeneBody/5'UTR/1st intron | ARMC1        | -4.165±0.468 | -4.527±0.378 | 3.79E-04 |
| cg20587336 | 8 | 66546482 | TSS200                    | ARMC1        | -4.05±0.535  | -4.424±0.572 | 1.72E-03 |
| cg23619829 | 8 | 66556444 | TSS1500                   | MTFR1        | -4.757±0.598 | -5.229±0.559 | 3.70E-04 |
| cg14299177 | 8 | 66557547 | GeneBody/5'UTR/1st intron | MTFR1        | -5.768±0.402 | -6.053±0.349 | 1.04E-03 |
| cg02067021 | 8 | 66934027 | GeneBody/5'UTR/1st intron | DNAJC5B      | 0.82±0.207   | 0.965±0.284  | 3.27E-03 |
| cg25352650 | 8 | 67341099 | GeneBody/1st intron       | LOC100505676 | -4.436±0.331 | -4.658±0.352 | 2.52E-03 |
| cg08090772 | 8 | 67344640 | TSS200                    | ADHFE1       | -4.156±0.344 | -4.419±0.489 | 1.58E-03 |
| cg17449882 | 8 | 67406020 | GeneBody/1st intron       | C8orf46      | 1.752±0.248  | 1.93±0.301   | 1.82E-03 |
| cg07595113 | 8 | 67525279 | GeneBody/5'UTR/1st exon   | MYBL1        | -3.938±0.294 | -4.148±0.431 | 3.29E-03 |
| cg14285013 | 8 | 67526270 | TSS1500                   | MYBL1        | -4.086±0.477 | -4.45±0.468  | 5.84E-04 |
| cg12790134 | 8 | 67578787 | GeneBody/1st exon         | VCP1P1       | -4.829±0.591 | -5.215±0.47  | 2.04E-03 |
| cg17045009 | 8 | 67579782 | TSS200                    | C8orf44-SGK3 | -4.139±0.311 | -4.456±0.446 | 4.85E-05 |
| cg19082446 | 8 | 67624552 | TSS200                    | SGK3         | -2.313±0.362 | -2±0.725     | 2.02E-03 |
| cg15754109 | 8 | 67974431 | GeneBody/5'UTR/1st exon   | COPS5        | -4.624±0.41  | -4.902±0.569 | 4.34E-03 |
| cg08419026 | 8 | 70747067 | GeneBody/5'UTR/1st intron | SLCO5A1      | -4.886±0.54  | -5.209±0.469 | 4.88E-03 |
| cg22083639 | 8 | 70747646 | TSS1500                   | SLCO5A1      | -3.612±0.282 | -3.938±0.407 | 7.37E-06 |
| cg10457247 | 8 | 70983079 | GeneBody/5'UTR/1st intron | PRDM14       | -3.161±0.193 | -3.294±0.277 | 4.25E-03 |
| cg09378940 | 8 | 71581306 | GeneBody/1st exon         | LACTB2       | -4.381±0.312 | -4.598±0.342 | 1.93E-03 |
| cg16793061 | 8 | 72273984 | GeneBody/5'UTR/1st exon   | EYA1         | -4.87±0.441  | -5.152±0.532 | 4.98E-03 |
| cg06269753 | 8 | 72755871 | TSS1500                   | LOC100132891 | -2.603±0.284 | -2.345±0.311 | 9.02E-05 |
| cg25396537 | 8 | 73921005 | TSS200                    | TERF1        | -4.851±0.346 | -5.044±0.339 | 9.76E-03 |
| cg13554114 | 8 | 73921144 | GeneBody/1st exon         | TERF1        | -4.445±0.292 | -4.823±0.416 | 9.76E-07 |
| cg23104955 | 8 | 74205400 | GeneBody/1st intron       | RPL7         | -5.493±0.527 | -5.81±0.395  | 3.94E-03 |
| cg06334496 | 8 | 74888924 | GeneBody/1st intron       | TMEM70       | -4.394±0.313 | -4.803±0.42  | 6.56E-07 |
| cg08949296 | 8 | 75233153 | GeneBody/1st exon         | JPH1         | -4.005±0.387 | -3.757±0.608 | 9.92E-03 |
| cg23087084 | 8 | 77912333 | GeneBody/5'UTR/1st exon   | PEX2         | -5.185±0.546 | -5.502±0.494 | 6.50E-03 |
| cg04689061 | 8 | 79427993 | TSS1500                   | PKIA         | -3.121±0.563 | -3.456±0.583 | 6.68E-03 |
| cg01069256 | 8 | 79577942 | TSS1500                   | ZC2HC1A      | -4.448±0.379 | -4.77±0.42   | 2.30E-04 |
| cg12803724 | 8 | 79578360 | GeneBody/5'UTR/1st exon   | ZC2HC1A      | -5.262±0.589 | -5.736±0.576 | 3.22E-04 |
| cg23512958 | 8 | 79717776 | TSS200                    | IL7          | -5.116±0.527 | -5.495±0.521 | 1.13E-03 |
| cg15576233 | 8 | 80679932 | GeneBody/5'UTR/1st exon   | HEY1         | -5.997±0.487 | -6.291±0.499 | 5.78E-03 |
| cg02595263 | 8 | 80942618 | TSS200                    | MRPS28       | -4.928±0.416 | -5.274±0.48  | 3.30E-04 |
| cg04341084 | 8 | 81083671 | GeneBody/1st exon         | TPD52        | -5.144±0.571 | -5.494±0.581 | 5.14E-03 |
| cg18459342 | 8 | 81084056 | TSS1500                   | TPD52        | -1.71±0.267  | -1.971±0.346 | 5.65E-05 |
| cg08631437 | 8 | 81557436 | GeneBody                  | ZNF704       | -1.69±0.256  | -1.902±0.246 | 2.21E-04 |

|             |   |           |                           |           |              |              |          |
|-------------|---|-----------|---------------------------|-----------|--------------|--------------|----------|
| cg16746631  | 8 | 82598140  | GeneBody                  | IMPA1     | -4.541±0.446 | -4.832±0.431 | 2.72E-03 |
| cg11726593  | 8 | 82598801  | TSS1500                   | IMPA1     | -1.498±0.191 | -1.652±0.268 | 8.46E-04 |
| cg26258330  | 8 | 82633130  | GeneBody/1st intron       | ZFAND1    | -4.135±0.293 | -4.514±0.382 | 6.81E-07 |
| cg17029151  | 8 | 82644517  | TSS200                    | CHMP4C    | -3.953±0.335 | -4.26±0.436  | 1.41E-04 |
| cg06027949  | 8 | 82754900  | TSS1500                   | SNX16     | -3.553±0.651 | -4.102±0.679 | 2.08E-04 |
| cg14830952  | 8 | 86089500  | TSS200                    | E2F5      | -5.365±0.628 | -6.048±0.588 | 4.61E-06 |
| cg17788832  | 8 | 87081654  | GeneBody/1st intron       | PSKH2     | -0.962±0.145 | -1.123±0.229 | 2.25E-05 |
| cg177711870 | 8 | 87354470  | TSS1500                   | WWP1      | -2.402±0.236 | -2.57±0.409  | 6.23E-03 |
| cg06242827  | 8 | 87355431  | GeneBody/5'UTR/1st intron | WWP1      | -4.828±0.398 | -5.107±0.553 | 3.33E-03 |
| cg01244871  | 8 | 87520844  | GeneBody/1st exon         | RMDN1     | -5.43±0.38   | -5.707±0.36  | 8.81E-04 |
| cg10473004  | 8 | 87526705  | GeneBody/5'UTR/1st exon   | CPNE3     | -5.563±0.501 | -5.936±0.541 | 9.38E-04 |
| cg16852892  | 8 | 89339473  | GeneBody/5'UTR/1st exon   | MMP16     | -4.875±0.416 | -5.215±0.486 | 4.18E-04 |
| cg05604720  | 8 | 90769698  | TSS1500                   | RIPK2     | -4.225±0.243 | -4.465±0.336 | 6.31E-05 |
| cg15054260  | 8 | 90769710  | TSS1500                   | RIPK2     | -3.938±0.249 | -4.259±0.377 | 1.45E-06 |
| cg07084161  | 8 | 90996382  | GeneBody/1st intron       | NBN       | -4.547±0.436 | -4.875±0.382 | 5.75E-04 |
| cg17724365  | 8 | 90997008  | TSS200                    | NBN       | -4.189±0.387 | -4.404±0.359 | 9.42E-03 |
| cg12402251  | 8 | 91094811  | GeneBody/1st intron       | CALB1     | -3.37±0.341  | -3.646±0.46  | 7.31E-04 |
| cg15170424  | 8 | 92052897  | GeneBody/1st exon         | TMEM55A   | -4.539±0.318 | -4.924±0.397 | 1.75E-06 |
| cg14346035  | 8 | 94928406  | TSS200                    | MIR378D2  | -4.926±0.394 | -5.161±0.408 | 6.50E-03 |
| cg06543761  | 8 | 94929239  | TSS200                    | PDP1      | -5.88±0.563  | -6.284±0.546 | 1.10E-03 |
| cg26323655  | 8 | 95448685  | GeneBody/5'UTR/1st intron | RAD54B    | 0.873±0.314  | 0.623±0.378  | 6.09E-04 |
| cg15995002  | 8 | 95487224  | GeneBody/5'UTR/1st intron | RAD54B    | -4.054±0.413 | -4.302±0.486 | 7.82E-03 |
| cg27091703  | 8 | 95487428  | TSS200                    | RAD54B    | -3.848±0.489 | -4.193±0.526 | 1.59E-03 |
| cg26350286  | 8 | 95652691  | TSS1500                   | ESRP1     | -4.222±0.329 | -4.429±0.309 | 3.55E-03 |
| cg16328273  | 8 | 95908119  | TSS1500                   | CCNE2     | -5.661±0.632 | -6.3±0.585   | 1.36E-05 |
| cg23644127  | 8 | 96037660  | GeneBody/1st intron       | NDUFAF6   | -3.895±0.324 | -4.168±0.373 | 2.80E-04 |
| cg23862908  | 8 | 96281399  | GeneBody/1st exon         | C8orf37   | -4.84±0.332  | -5.272±0.501 | 1.20E-06 |
| cg17889103  | 8 | 97247634  | GeneBody/1st intron       | UQCRB     | -4.865±0.369 | -5.139±0.36  | 8.05E-04 |
| cg00265490  | 8 | 98655845  | TSS1500                   | MTDH      | -3.278±0.348 | -3.525±0.493 | 3.06E-03 |
| cg05237543  | 8 | 98656054  | TSS1500                   | MTDH      | -3.965±0.674 | -4.51±0.71   | 3.63E-04 |
| cg11713008  | 8 | 99129222  | GeneBody/1st intron       | HRSP12    | -4.379±0.439 | -4.659±0.552 | 5.63E-03 |
| cg15399561  | 8 | 99129939  | TSS200                    | POP1      | -4.92±0.477  | -5.354±0.614 | 1.47E-04 |
| cg26804057  | 8 | 99130997  | GeneBody/5'UTR/1st intron | POP1      | 2.937±0.181  | 3.044±0.174  | 6.12E-03 |
| cg15264255  | 8 | 99306718  | TSS200                    | NIPAL2    | -2.825±0.313 | -2.521±0.388 | 5.25E-05 |
| cg27147306  | 8 | 99837480  | GeneBody/1st intron       | STK3      | -4.031±0.539 | -4.399±0.52  | 1.79E-03 |
| cg00420715  | 8 | 100025364 | TSS200                    | VPS13B    | -5.392±0.485 | -5.723±0.385 | 1.35E-03 |
| cg00155167  | 8 | 100025831 | GeneBody/1st intron       | VPS13B    | -4.852±0.645 | -5.426±0.591 | 8.16E-05 |
| cg24267801  | 8 | 100905507 | GeneBody/5'UTR/1st intron | COX6C     | -4.084±0.275 | -4.325±0.379 | 3.12E-04 |
| cg13919215  | 8 | 101162909 | GeneBody/5'UTR/1st exon   | POLR2K    | -4.109±0.615 | -4.673±0.635 | 7.06E-05 |
| cg14358709  | 8 | 101321928 | GeneBody/5'UTR/1st intron | RNF19A    | -5.255±0.293 | -5.615±0.54  | 1.21E-05 |
| cg11906718  | 8 | 101322791 | TSS1500                   | RNF19A    | -1.989±0.16  | -2.155±0.251 | 5.94E-05 |
| cg12548064  | 8 | 101571911 | GeneBody/5'UTR/1st exon   | ANKRD46   | -4.926±0.49  | -5.309±0.385 | 3.21E-04 |
| cg23737055  | 8 | 101572127 | TSS200                    | ANKRD46   | -2.942±0.253 | -3.165±0.318 | 2.07E-04 |
| cg20304401  | 8 | 101733920 | GeneBody/5'UTR/1st exon   | PABPC1    | -2.615±0.344 | -2.267±0.391 | 2.24E-05 |
| cg18282619  | 8 | 102217292 | GeneBody/5'UTR/1st intron | ZNF706    | -4.253±0.373 | -4.504±0.478 | 3.77E-03 |
| cg16124821  | 8 | 102218091 | TSS200                    | ZNF706    | -4.567±0.275 | -4.891±0.534 | 3.69E-05 |
| cg17769158  | 8 | 103563327 | TSS1500                   | ODF1      | 3.036±0.182  | 3.149±0.179  | 4.23E-03 |
| cg07065941  | 8 | 103667760 | GeneBody/1st intron       | KLF10     | -3.692±0.206 | -3.487±0.242 | 3.47E-05 |
| cg19352977  | 8 | 103876467 | TSS200                    | AZIN1     | -4.963±0.475 | -5.254±0.415 | 3.96E-03 |
| cg19188612  | 8 | 104384291 | TSS1500                   | CTHRC1    | 1.484±0.246  | 1.657±0.293  | 2.10E-03 |
| cg19288520  | 8 | 104427260 | GeneBody/5'UTR/1st exon   | SLC25A32  | -5.579±0.451 | -5.881±0.431 | 2.09E-03 |
| cg09531892  | 8 | 105601835 | TSS1500                   | LRP12     | -3.053±0.298 | -3.316±0.443 | 3.90E-04 |
| cg17176732  | 8 | 107669856 | TSS200                    | QXR1      | -4.401±0.333 | -4.69±0.411  | 2.36E-04 |
| cg09396217  | 8 | 108510286 | TSS200                    | ANGPT1    | -0.882±0.266 | -1.058±0.321 | 3.59E-03 |
| cg15484019  | 8 | 109455575 | TSS1500                   | EMC2      | -4.568±0.319 | -4.967±0.447 | 1.65E-06 |
| cg26021476  | 8 | 110346385 | TSS200                    | NUDCD1    | -5.195±0.366 | -5.62±0.503  | 5.25E-06 |
| cg06084735  | 8 | 110346664 | GeneBody/1st exon         | ENY2      | -5.284±0.458 | -5.742±0.618 | 4.93E-05 |
| cg25824226  | 8 | 110551708 | TSS1500                   | EBAG9     | -4.692±0.305 | -4.913±0.317 | 1.16E-03 |
| cg17452277  | 8 | 110551976 | GeneBody/5'UTR/1st exon   | EBAG9     | -5.523±0.499 | -5.859±0.465 | 1.92E-03 |
| cg06821993  | 8 | 114449011 | GeneBody/1st exon         | CSMD3     | -3.045±0.34  | -3.247±0.317 | 5.58E-03 |
| cg01911082  | 8 | 114449272 | TSS200                    | CSMD3     | -4.046±0.664 | -4.42±0.456  | 6.20E-03 |
| cg02735071  | 8 | 117767874 | GeneBody/1st intron       | EIF3H     | -4.336±0.247 | -4.593±0.381 | 5.26E-05 |
| cg24971490  | 8 | 117778891 | GeneBody/1st exon         | UTP23     | -4.104±0.212 | -4.226±0.222 | 8.61E-03 |
| cg14729071  | 8 | 117886537 | TSS200                    | RAD21-AS1 | -3.616±0.207 | -3.9±0.367   | 1.34E-06 |
| cg05160935  | 8 | 118532754 | TSS1500                   | MED30     | -4.635±0.363 | -4.86±0.464  | 7.50E-03 |
| cg02422627  | 8 | 118533004 | GeneBody/5'UTR/1st exon   | MED30     | -4.142±0.189 | -4.266±0.296 | 8.19E-03 |
| cg17293641  | 8 | 119964144 | GeneBody/5'UTR/1st exon   | TNFRSF11B | -5.099±0.402 | -5.353±0.551 | 7.62E-03 |
| cg20379125  | 8 | 120428519 | TSS200                    | NOV       | -5.195±0.556 | -5.541±0.62  | 5.34E-03 |
| cg09076012  | 8 | 120428898 | GeneBody/1st intron       | NOV       | -3.144±0.243 | -3.338±0.259 | 4.19E-04 |
| cg14409958  | 8 | 120651652 | TSS1500                   | ENPP2     | -3.618±0.566 | -4.024±0.553 | 1.13E-03 |
| cg02511532  | 8 | 120845155 | TSS200                    | TAF2      | -4.827±0.62  | -5.231±0.626 | 2.93E-03 |
| cg08197122  | 8 | 120868512 | TSS1500                   | DSCC1     | -4.347±0.263 | -4.611±0.396 | 7.86E-05 |
| cg05365525  | 8 | 120885882 | TSS200                    | DEPTOR    | -4.232±0.435 | -4.587±0.567 | 5.83E-04 |
| cg21051423  | 8 | 121457935 | TSS1500                   | MRPL13    | -4.547±0.361 | -4.879±0.506 | 1.78E-04 |
| cg14992108  | 8 | 121825470 | TSS1500                   | SNTB1     | 1.142±0.287  | 1.331±0.346  | 3.99E-03 |
| cg19275050  | 8 | 122653619 | GeneBody/5'UTR/1st exon   | HAS2      | -3.061±0.415 | -3.357±0.51  | 2.00E-03 |
| cg12254515  | 8 | 124054090 | GeneBody/1st intron       | DERL1     | -5.19±0.677  | -5.635±0.673 | 2.60E-03 |
| cg27121132  | 8 | 124054909 | TSS1500                   | DERL1     | -4.263±0.387 | -4.688±0.535 | 1.29E-05 |
| cg00871453  | 8 | 124084640 | TSS1500                   | TBC1D31   | -3.805±0.381 | -4.056±0.531 | 5.65E-03 |
| cg18956095  | 8 | 124287111 | TSS1500                   | ZHX1      | -3.701±0.219 | -3.834±0.246 | 6.53E-03 |
| cg18604888  | 8 | 124408541 | GeneBody/1st exon         | ATAD2     | -3.937±0.292 | -4.194±0.401 | 2.87E-04 |
| cg08573893  | 8 | 124428540 | TSS1500                   | WDYHV1    | -4.075±0.613 | -4.483±0.601 | 2.32E-03 |
| cg12646585  | 8 | 124429417 | GeneBody/1st intron       | WDYHV1    | -4.044±0.663 | -4.685±0.66  | 3.15E-05 |
| cg25406735  | 8 | 124553149 | GeneBody/1st exon         | FBXO32    | -5.084±0.412 | -5.353±0.411 | 2.80E-03 |
| cg00465846  | 8 | 125486974 | TSS200                    | RNF139    | -5.694±0.71  | -6.241±0.657 | 4.80E-04 |
| cg11719412  | 8 | 125551441 | GeneBody/5'UTR/1st exon   | NDUFB9    | -5.894±0.557 | -6.468±0.516 | 1.02E-05 |
| cg02226697  | 8 | 126010266 | TSS1500                   | SQLE      | -5.508±0.427 | -5.798±0.448 | 2.15E-03 |
| cg04618607  | 8 | 126011005 | GeneBody/5'UTR/1st exon   | SQLE      | -5.129±0.437 | -5.415±0.375 | 2.15E-03 |
| cg20379012  | 8 | 126103681 | GeneBody/5'UTR/1st intron | KIAA0196  | -5.389±0.351 | -5.75±0.43   | 2.30E-05 |
| cg05440218  | 8 | 126104540 | GeneBody/5'UTR/1st intron | NSMCE2    | -5.013±0.389 | -5.28±0.433  | 2.20E-03 |
| cg15312298  | 8 | 127570908 | TSS200                    | FAM84B    | -1.339±0.125 | -1.45±0.183  | 3.23E-04 |
| cg24243265  | 8 | 130799851 | TSS1500                   | GSDMC     | 1.492±0.252  | 1.73±0.242   | 4.01E-05 |
| cg18152311  | 8 | 130951244 | GeneBody/5'UTR/1st intron | FAM49B    | -4.187±0.62  | -4.675±0.593 | 4.03E-04 |
| cg06307601  | 8 | 130952644 | TSS1500                   | FAM49B    | -4.521±0.449 | -4.784±0.412 | 6.27E-03 |
| cg12791465  | 8 | 133093721 | GeneBody                  | HHLA1     | 1.063±0.114  | 1.188±0.157  | 1.32E-05 |

|            |   |            |                           |              |              |              |          |
|------------|---|------------|---------------------------|--------------|--------------|--------------|----------|
| cg27016990 | 8 | 133492476  | GeneBody/1st exon         | KCNQ3        | -5.618±0.58  | -6.085±0.812 | 8.77E-04 |
| cg18153124 | 8 | 133493154  | TSS200                    | KCNQ3        | -4.532±0.335 | -4.266±0.36  | 4.64E-04 |
| cg13755023 | 8 | 133687491  | GeneBody/1st intron       | LRRC6        | -4.65±0.367  | -4.979±0.442 | 1.47E-04 |
| cg16551261 | 8 | 133687929  | TSS200                    | LRRC6        | -3.545±0.319 | -3.789±0.444 | 1.42E-03 |
| cg27342122 | 8 | 133787442  | TSS200                    | PHF20L1      | -4.788±0.433 | -5.09±0.355  | 1.12E-03 |
| cg24833176 | 8 | 133788347  | GeneBody/5'UTR/1st intron | PHF20L1      | -3.5±0.391   | -3.732±0.416 | 7.23E-03 |
| cg03670238 | 8 | 134202370  | TSS1500                   | WISP1        | 0.685±0.195  | 0.868±0.256  | 1.06E-04 |
| cg02503970 | 8 | 134584145  | GeneBody/5'UTR/1st exon   | ST3GAL1      | -4.919±0.339 | -5.122±0.363 | 6.78E-03 |
| cg19791277 | 8 | 136469780  | GeneBody/5'UTR/1st exon   | KHDRBS3      | -6.137±0.682 | -6.643±0.691 | 8.49E-04 |
| cg03396229 | 8 | 139926571  | TSS1500                   | COL22A1      | -3.86±0.408  | -4.211±0.505 | 2.64E-04 |
| cg23430634 | 8 | 140943869  | GeneBody                  | TRAPPC9      | 2.445±0.269  | 2.266±0.332  | 3.83E-03 |
| cg12002314 | 8 | 141521209  | TSS200                    | CHAC1        | -4.055±0.286 | -4.316±0.498 | 5.66E-04 |
| cg22610305 | 8 | 141521720  | GeneBody/1st exon         | CHAC1        | -4.615±0.394 | -5.042±0.515 | 1.29E-05 |
| cg16286776 | 8 | 141644897  | GeneBody/1st intron       | AGO2         | -5.352±0.539 | -5.836±0.5   | 7.29E-05 |
| cg13405161 | 8 | 141646303  | TSS1500                   | AGO2         | -5.039±0.568 | -5.572±0.544 | 4.30E-05 |
| cg01806808 | 8 | 142011144  | GeneBody/5'UTR/1st intron | PTK2         | -5.811±0.607 | -6.2±0.605   | 3.40E-03 |
| cg24473633 | 8 | 142138319  | TSS1500                   | DENND3       | -4.966±0.278 | -5.288±0.453 | 1.29E-05 |
| cg21240812 | 8 | 143483748  | GeneBody/5'UTR/1st intron | TSNARE1      | -4.706±0.323 | -5.119±0.454 | 1.09E-06 |
| cg21210789 | 8 | 143454539  | GeneBody/5'UTR/1st exon   | BAI1         | -1.552±0.159 | -1.67±0.271  | 4.04E-03 |
| cg10104451 | 8 | 143696006  | TSS200                    | ARC          | -3.219±0.442 | -3.504±0.575 | 5.58E-03 |
| cg18270343 | 8 | 143748005  | GeneBody/5'UTR/1st intron | JRK          | 0.576±0.205  | 0.716±0.338  | 6.97E-03 |
| cg20281815 | 8 | 143761508  | TSS1500                   | PSCA         | 2.056±0.248  | 2.212±0.341  | 7.71E-03 |
| cg10913563 | 8 | 143808814  | GeneBody/1st exon         | THEM6        | -4.059±0.349 | -3.636±0.415 | 1.46E-06 |
| cg04311964 | 8 | 143833942  | GeneBody/5'UTR/1st exon   | LYPD2        | 1.543±0.215  | 1.693±0.298  | 3.25E-03 |
| cg07711097 | 8 | 143915954  | TSS1500                   | GML          | 2.462±0.257  | 2.191±0.297  | 1.20E-05 |
| cg04678793 | 8 | 144099566  | GeneBody/1st intron       | LOC100133669 | -4.467±0.442 | -4.73±0.529  | 8.77E-03 |
| cg06597861 | 8 | 144100572  | GeneBody/5'UTR/1st intron | LY6E         | -4.929±0.35  | -5.234±0.365 | 1.40E-04 |
| cg07770222 | 8 | 144120106  | TSS1500                   | C8orf31      | -0.664±0.425 | -0.285±0.494 | 1.41E-04 |
| cg03773789 | 8 | 144348945  | TSS1500                   | GLI4         | -3.305±0.306 | -3.513±0.369 | 3.01E-03 |
| cg16007680 | 8 | 144349898  | GeneBody/5'UTR/1st intron | GLI4         | -5.514±0.737 | -6.113±0.62  | 2.21E-04 |
| cg24596472 | 8 | 1444117263 | TSS1500                   | TOP1MT       | -2.994±0.252 | -3.168±0.272 | 1.99E-03 |
| cg10298205 | 8 | 144661917  | TSS1500                   | NAPRT1       | 3.125±0.226  | 3.291±0.347  | 2.89E-03 |
| cg23088430 | 8 | 144679052  | GeneBody/5'UTR/1st exon   | EEF1D        | -4.434±0.427 | -4.703±0.448 | 4.21E-03 |
| cg15555727 | 8 | 144692268  | TSS1500                   | PYCRL        | -3.591±0.227 | -3.833±0.326 | 2.65E-05 |
| cg19150884 | 8 | 144699502  | GeneBody/5'UTR/1st intron | TSTA3        | -4.398±0.218 | -4.528±0.249 | 7.46E-03 |
| cg24216294 | 8 | 144732501  | GeneBody/1st exon         | ZNF623       | 3.226±0.207  | 3.36±0.186   | 2.46E-03 |
| cg17150465 | 8 | 144897558  | TSS200                    | SCRIB        | -5.967±0.509 | -6.432±0.523 | 7.32E-05 |
| cg18149919 | 8 | 144912049  | TSS1500                   | PUF60        | 2.274±0.228  | 2.43±0.228   | 1.87E-03 |
| cg02868338 | 8 | 145133133  | TSS1500                   | EXOSC4       | -4.458±0.333 | -4.649±0.326 | 8.06E-03 |
| cg25788012 | 8 | 145133899  | GeneBody/1st intron       | EXOSC4       | -5.669±0.553 | -6.178±0.602 | 7.61E-05 |
| cg08020051 | 8 | 145137133  | TSS1500                   | GPA1         | -4.167±0.47  | -4.512±0.537 | 1.25E-03 |
| cg20669525 | 8 | 145137896  | GeneBody/1st intron       | GPA1         | -5.545±0.413 | -5.904±0.574 | 3.50E-04 |
| cg22138278 | 8 | 145158307  | GeneBody/1st intron       | SHARPIN      | -4.689±0.384 | -5.066±0.485 | 5.00E-05 |
| cg08825571 | 8 | 145159373  | GeneBody/5'UTR/1st exon   | MAF1         | -5.394±0.728 | -5.996±0.599 | 1.74E-04 |
| cg15984612 | 8 | 145514624  | GeneBody/1st exon         | BOP1         | -4.438±0.449 | -4.779±0.565 | 1.15E-03 |
| cg07103819 | 8 | 145550365  | GeneBody/5'UTR/1st exon   | DGAT1        | -5.455±0.57  | -5.903±0.611 | 5.26E-04 |
| cg15301700 | 8 | 145560531  | TSS1500                   | SCRT1        | -3.581±0.245 | -3.775±0.365 | 1.33E-03 |
| cg03347966 | 8 | 145582459  | GeneBody/5'UTR/1st intron | SLC52A2      | -4.781±0.54  | -5.132±0.572 | 3.30E-03 |
| cg18511989 | 8 | 145634287  | GeneBody                  | CPSF1        | -3.765±0.31  | -3.964±0.405 | 5.92E-03 |
| cg20326853 | 8 | 145635294  | TSS1500                   | CPSF1        | -4.354±0.3   | -4.695±0.433 | 9.67E-06 |
| cg02226871 | 8 | 145653662  | GeneBody/5'UTR/1st intron | VPS28        | -5.233±0.349 | -5.532±0.486 | 4.25E-04 |
| cg11238505 | 8 | 145691776  | GeneBody/5'UTR/1st exon   | KIFC2        | -4.939±0.335 | -5.223±0.55  | 9.69E-04 |
| cg11757293 | 8 | 145692581  | GeneBody                  | KIFC2        | -2.023±0.264 | -2.186±0.311 | 6.12E-03 |
| cg04515567 | 8 | 145701568  | GeneBody/5'UTR/1st exon   | FOXH1        | 2.4±0.193    | 2.57±0.251   | 2.45E-04 |
| cg05113558 | 8 | 145702343  | TSS1500                   | FOXH1        | 1.235±0.219  | 1.455±0.286  | 4.34E-05 |
| cg22563697 | 8 | 145722190  | GeneBody/5'UTR/1st exon   | PPP1R16A     | 2.491±0.204  | 2.724±0.284  | 7.51E-06 |
| cg21226234 | 8 | 145741991  | GeneBody                  | RECQL4       | 2.856±0.187  | 3.016±0.291  | 7.07E-04 |
| cg15857475 | 8 | 145742913  | GeneBody                  | RECQL4       | -5.167±0.473 | -5.582±0.688 | 3.88E-04 |
| cg11609366 | 8 | 146018277  | TSS1500                   | RPL8         | -4.523±0.54  | -4.856±0.589 | 5.51E-03 |
| cg12270520 | 8 | 146023939  | TSS1500                   | ZNF517       | -4.911±0.458 | -5.236±0.492 | 1.50E-03 |
| cg27449959 | 8 | 146024786  | GeneBody/5'UTR/1st intron | ZNF517       | -3.251±0.509 | -3.562±0.604 | 6.98E-03 |
| cg26421123 | 8 | 146078231  | GeneBody/5'UTR/1st intron | COMMD5       | -4.705±0.509 | -5.246±0.573 | 1.03E-05 |
| cg13592003 | 8 | 146126815  | GeneBody/5'UTR/1st exon   | ZNF250       | -5.595±0.501 | -5.986±0.632 | 8.73E-04 |
| cg25201980 | 8 | 146127417  | TSS1500                   | ZNF250       | -5.159±0.342 | -5.571±0.484 | 3.33E-06 |
| cg07534467 | 8 | 146176336  | TSS200                    | ZNF16        | -3.958±0.549 | -4.41±0.554  | 2.63E-04 |
| cg21140292 | 9 | 2015788    | GeneBody/5'UTR/1st intron | SMARCA2      | -4.891±0.416 | -5.25±0.471  | 1.94E-04 |
| cg03591594 | 9 | 2621918    | GeneBody/5'UTR/1st exon   | VLDLR        | -4.91±0.556  | -5.464±0.488 | 1.55E-05 |
| cg21331335 | 9 | 2717325    | TSS200                    | KCNV2        | 3.213±0.202  | 3.37±0.21    | 5.41E-04 |
| cg26428825 | 9 | 2717531    | GeneBody/5'UTR/1st exon   | KCNV2        | 2.525±0.296  | 2.724±0.312  | 2.38E-03 |
| cg21387302 | 9 | 3526198    | TSS1500                   | RFX3         | -4.016±0.39  | -4.274±0.585 | 6.91E-03 |
| cg04972545 | 9 | 3526297    | TSS1500                   | RFX3         | -4.264±0.43  | -4.536±0.525 | 5.67E-03 |
| cg24611631 | 9 | 4490288    | TSS200                    | SLC1A1       | -4.975±0.408 | -5.29±0.396  | 5.03E-04 |
| cg06207460 | 9 | 4741011    | GeneBody/1st exon         | AK3          | -2.678±0.421 | -2.374±0.442 | 1.24E-03 |
| cg25282780 | 9 | 4741505    | TSS200                    | AK3          | -3.539±0.47  | -3.861±0.459 | 1.76E-03 |
| cg01036173 | 9 | 5437898    | GeneBody/5'UTR/1st exon   | PLGRKT       | -5.391±0.639 | -5.874±0.528 | 4.97E-04 |
| cg02823866 | 9 | 5450410    | TSS200                    | CD274        | -4.718±0.652 | -5.25±0.494  | 1.80E-04 |
| cg07211259 | 9 | 5510497    | TSS200                    | PDCD1LG2     | -2.695±0.446 | -2.97±0.517  | 6.12E-03 |
| cg05418129 | 9 | 6242210    | GeneBody                  | IL33         | 1.339±0.372  | 1.572±0.334  | 4.01E-03 |
| cg13875807 | 9 | 6758935    | GeneBody/5'UTR/1st intron | KDM4C        | -3.502±0.308 | -3.809±0.296 | 1.81E-05 |
| cg18043828 | 9 | 12774985   | TSS200                    | LURAP1L      | -4.557±0.428 | -4.823±0.487 | 5.62E-03 |
| cg04217218 | 9 | 14693888   | TSS1500                   | ZDHHC2       | 1.196±0.215  | 1.345±0.272  | 2.97E-03 |
| cg22153116 | 9 | 15306736   | GeneBody/1st intron       | TTC39B       | -4.759±0.326 | -5.23±0.505  | 1.88E-07 |
| cg11680158 | 9 | 15307376   | TSS200                    | TTC39B       | -3.756±0.282 | -3.971±0.31  | 7.87E-04 |
| cg16645539 | 9 | 15422589   | TSS200                    | SNAPC3       | -5.29±0.407  | -5.785±0.697 | 8.81E-06 |
| cg21927363 | 9 | 15552206   | TSS1500                   | CCDC171      | -2.94±0.243  | -2.67±0.299  | 6.48E-06 |
| cg17511416 | 9 | 15553286   | GeneBody/5'UTR/1st exon   | CCDC171      | -4.884±0.467 | -5.219±0.51  | 1.42E-03 |
| cg17887537 | 9 | 19049789   | GeneBody/1st exon         | RRAGA        | -4.552±0.382 | -4.818±0.443 | 2.17E-03 |
| cg13060646 | 9 | 19127573   | GeneBody/1st exon         | PLIN2        | -5.397±0.502 | -5.784±0.592 | 8.07E-04 |
| cg02942159 | 9 | 19379994   | GeneBody/1st intron       | RPS6         | -5.188±0.621 | -5.791±0.644 | 3.21E-05 |
| cg16925486 | 9 | 19380496   | TSS1500                   | RPS6         | -4.457±0.375 | -4.748±0.417 | 6.57E-04 |
| cg18264687 | 9 | 20622357   | GeneBody/5'UTR/1st exon   | MLL73        | -3.527±0.692 | -4.115±0.61  | 1.40E-04 |
| cg09730361 | 9 | 20622599   | TSS200                    | MLL73        | -4.945±0.37  | -5.168±0.384 | 6.03E-03 |
| cg19982860 | 9 | 21166581   | GeneBody/1st exon         | IFNA21       | 1.547±0.175  | 1.707±0.246  | 1.94E-04 |
| cg01074640 | 9 | 21228142   | GeneBody/1st exon         | IFNA17       | 1.748±0.178  | 1.916±0.277  | 2.12E-04 |
| cg23426587 | 9 | 21335126   | GeneBody/5'UTR/1st exon   | KLHL9        | -4.524±0.275 | -4.833±0.462 | 2.34E-05 |

|            |   |          |                           |            |              |              |          |
|------------|---|----------|---------------------------|------------|--------------|--------------|----------|
| cg01906717 | 9 | 21368203 | TSS200                    | IFNA13     | 1.321±0.297  | 1.499±0.34   | 7.47E-03 |
| cg15669228 | 9 | 21409505 | GeneBody/1st exon         | IFNA8      | 1.319±0.195  | 1.189±0.249  | 4.04E-03 |
| cg01940974 | 9 | 21802655 | GeneBody/5'UTR/1st exon   | MTAP       | -5.14±0.331  | -5.421±0.372 | 2.33E-04 |
| cg12840719 | 9 | 21968233 | GeneBody/3'UTR            | CDKN2A     | -2.489±0.213 | -2.642±0.273 | 2.08E-03 |
| cg26673943 | 9 | 21994965 | GeneBody/1st exon         | CDKN2B-AS1 | -4.256±0.627 | -4.794±0.608 | 1.41E-04 |
| cg02400248 | 9 | 22009355 | TSS200                    | CDKN2B     | -5.531±0.42  | -5.95±0.608  | 6.97E-05 |
| cg01716061 | 9 | 22009518 | TSS1500                   | CDKN2B     | -3.153±0.164 | -3.408±0.355 | 8.58E-07 |
| cg07623294 | 9 | 23826507 | TSS1500                   | ELAVL2     | -4.463±0.273 | -4.69±0.422  | 9.33E-04 |
| cg09491779 | 9 | 26893124 | TSS1500                   | CAAP1      | -2.981±0.686 | -3.408±0.828 | 6.27E-03 |
| cg27322545 | 9 | 26946855 | TSS200                    | IFT74      | -5.737±0.43  | -6.038±0.39  | 1.26E-03 |
| cg09827833 | 9 | 27109492 | GeneBody/5'UTR/1st exon   | TEK        | -2.75±0.271  | -2.915±0.325 | 7.47E-03 |
| cg23074747 | 9 | 27573817 | GeneBody/5'UTR/1st exon   | C9orf72    | -6.18±0.487  | -6.688±0.538 | 1.28E-05 |
| cg11613875 | 9 | 27573889 | TSS200                    | C9orf72    | -4.833±0.588 | -5.209±0.666 | 4.28E-03 |
| cg18178963 | 9 | 32573171 | GeneBody/5'UTR/1st exon   | NDUFB6     | -5.692±0.489 | -6.131±0.521 | 1.00E-04 |
| cg16758041 | 9 | 32573371 | TSS200                    | NDUFB6     | -4.218±0.517 | -4.638±0.552 | 3.54E-04 |
| cg19432894 | 9 | 33025349 | GeneBody/5'UTR/1st exon   | DNAJA1     | -5.337±0.383 | -5.791±0.562 | 5.23E-06 |
| cg14829378 | 9 | 33167077 | GeneBody/1st exon         | B4GALT1    | -5.112±0.416 | -5.456±0.64  | 9.48E-04 |
| cg20999934 | 9 | 33290511 | GeneBody/5'UTR/1st exon   | NFX1       | -4.282±0.234 | -4.576±0.404 | 5.25E-06 |
| cg03863549 | 9 | 33474004 | TSS200                    | NOL6       | -4.67±0.414  | -4.92±0.392  | 5.12E-03 |
| cg12687990 | 9 | 33677449 | TSS200                    | PTENP1     | -3.84±0.297  | -4.065±0.319 | 7.84E-04 |
| cg19367388 | 9 | 33816707 | TSS1500                   | UBE2R2     | -5.225±0.412 | -5.503±0.419 | 2.18E-03 |
| cg08351143 | 9 | 33817857 | GeneBody/1st exon         | UBE2R2     | -5.125±0.412 | -5.447±0.466 | 6.46E-04 |
| cg21511069 | 9 | 34049294 | TSS1500                   | UBAP2      | -4.736±0.336 | -5.012±0.449 | 5.75E-04 |
| cg18676764 | 9 | 34127499 | TSS1500                   | DCAF12     | 3.553±0.237  | 3.813±0.342  | 1.68E-05 |
| cg14167017 | 9 | 34178925 | TSS200                    | UBAP1      | -4.86±0.328  | -5.067±0.325 | 3.80E-03 |
| cg04322134 | 9 | 34328884 | GeneBody/5'UTR/1st intron | KIF24      | -3.579±0.401 | -3.852±0.45  | 2.49E-03 |
| cg19398446 | 9 | 34329521 | GeneBody/5'UTR/1st exon   | NUDT2      | -5.111±0.427 | -5.427±0.517 | 1.32E-03 |
| cg05208153 | 9 | 34398637 | TSS1500                   | C9orf24    | 1.696±0.204  | 1.861±0.258  | 5.55E-04 |
| cg10049968 | 9 | 34458533 | GeneBody/5'UTR/1st exon   | FAM219A    | -4.724±0.23  | -5.033±0.398 | 1.69E-06 |
| cg06308323 | 9 | 34459568 | GeneBody/1st intron       | DNAI1      | 2.263±0.254  | 2.421±0.353  | 8.68E-03 |
| cg13226172 | 9 | 34589381 | GeneBody/5'UTR/1st intron | CNTFR      | -4.886±0.505 | -5.281±0.524 | 5.03E-04 |
| cg10922163 | 9 | 34611951 | GeneBody/5'UTR/1st intron | RPP25L     | -3.741±0.285 | -3.504±0.349 | 3.93E-04 |
| cg07557424 | 9 | 34613043 | TSS1500                   | RPP25L     | -3.874±0.362 | -4.21±0.41   | 7.35E-05 |
| cg22579849 | 9 | 34620091 | GeneBody/1st intron       | DCTN3      | -4.331±0.314 | -4.689±0.448 | 8.46E-06 |
| cg06418184 | 9 | 34620572 | TSS200                    | DCTN3      | -4.026±0.318 | -4.235±0.489 | 7.89E-03 |
| cg25476145 | 9 | 34646939 | GeneBody/5'UTR/1st intron | GALT       | -5.751±0.429 | -6.045±0.422 | 1.73E-03 |
| cg09722555 | 9 | 34662282 | GeneBody                  | CCL27      | 2.571±0.231  | 2.794±0.309  | 7.94E-05 |
| cg08418332 | 9 | 34691001 | GeneBody/1st intron       | CCL19      | 1.155±0.145  | 1.292±0.233  | 2.57E-04 |
| cg23655719 | 9 | 34692578 | TSS1500                   | CCL19      | 2.954±0.259  | 2.777±0.271  | 2.00E-03 |
| cg26315493 | 9 | 35071724 | GeneBody/1st intron       | VCP        | -4.017±0.625 | -4.518±0.583 | 3.11E-04 |
| cg03563403 | 9 | 35079882 | GeneBody/5'UTR/1st exon   | FANCG      | -5.837±0.595 | -6.395±0.577 | 4.57E-05 |
| cg14281165 | 9 | 35096257 | GeneBody/5'UTR/1st exon   | PIGO       | -4.213±0.351 | -4.465±0.545 | 3.80E-03 |
| cg23378495 | 9 | 35096265 | GeneBody/5'UTR/1st exon   | PIGO       | -4.491±0.423 | -4.799±0.548 | 1.90E-03 |
| cg16213976 | 9 | 35096797 | TSS200                    | PIGO       | -4.121±0.337 | -4.413±0.431 | 2.78E-04 |
| cg01253107 | 9 | 35102903 | GeneBody/1st intron       | STOML2     | -4.548±0.442 | -4.919±0.539 | 3.36E-04 |
| cg19026306 | 9 | 35116525 | TSS1500                   | FAM214B    | -4.868±0.409 | -5.148±0.413 | 1.87E-03 |
| cg06216677 | 9 | 35603842 | TSS1500                   | TESK1      | -5.048±0.407 | -5.642±0.595 | 1.22E-07 |
| cg18557145 | 9 | 35618083 | GeneBody                  | CD72       | 2.568±0.279  | 2.775±0.303  | 9.86E-04 |
| cg05830416 | 9 | 35665010 | GeneBody/1st intron       | ARHGEF39   | -4.263±0.196 | -4.39±0.218  | 3.65E-03 |
| cg22880820 | 9 | 35665522 | TSS1500                   | ARHGEF39   | -3.265±0.357 | -3.596±0.406 | 7.97E-05 |
| cg24070292 | 9 | 35689808 | GeneBody/1st exon         | TPM2       | -0.86±0.199  | -0.983±0.244 | 6.83E-03 |
| cg17691309 | 9 | 35690459 | TSS1500                   | TPM2       | -5.76±0.768  | -6.391±0.722 | 2.33E-04 |
| cg00833393 | 9 | 35731638 | TSS1500                   | CREB3      | -4.656±0.21  | -5.048±0.435 | 1.00E-08 |
| cg05219900 | 9 | 35732569 | TSS200                    | TLN1       | -4.704±0.366 | -5.029±0.455 | 1.86E-04 |
| cg10822116 | 9 | 35733370 | TSS1500                   | TLN1       | -2.504±0.362 | -2.758±0.523 | 3.76E-03 |
| cg26471445 | 9 | 35749414 | GeneBody/5'UTR/1st intron | RGP1       | -5.267±0.519 | -5.708±0.58  | 2.31E-04 |
| cg04109220 | 9 | 35812293 | TSS200                    | SPAG8      | -4.763±0.626 | -5.207±0.63  | 1.36E-03 |
| cg27490193 | 9 | 35815239 | TSS200                    | HINT2      | -4.91±0.444  | -5.211±0.523 | 2.81E-03 |
| cg12717594 | 9 | 36037454 | GeneBody/1st intron       | RECK       | -4.916±0.465 | -5.378±0.664 | 6.99E-05 |
| cg05412136 | 9 | 36191352 | GeneBody/1st intron       | CLTA       | -4.216±0.472 | -4.55±0.531  | 1.71E-03 |
| cg06087537 | 9 | 36401074 | GeneBody/5'UTR/1st intron | RNF38      | -4.459±0.418 | -4.814±0.629 | 6.43E-04 |
| cg13098382 | 9 | 36401460 | TSS1500                   | RNF38      | -4.49±0.328  | -4.83±0.384  | 1.71E-05 |
| cg01288067 | 9 | 36572645 | TSS1500                   | MELK       | -4.404±0.445 | -4.817±0.513 | 7.98E-05 |
| cg14776416 | 9 | 36573072 | GeneBody/1st intron       | MELK       | -4.662±0.386 | -4.997±0.316 | 9.27E-05 |
| cg22753607 | 9 | 37120306 | TSS200                    | ZCCHC7     | -3.707±0.316 | -3.941±0.384 | 1.34E-03 |
| cg27538954 | 9 | 37120902 | GeneBody/5'UTR/1st intron | ZCCHC7     | -5.166±0.54  | -5.761±0.726 | 1.10E-05 |
| cg10289190 | 9 | 37422575 | TSS200                    | GRHRP      | -4.967±0.416 | -5.353±0.382 | 4.66E-05 |
| cg26850145 | 9 | 37465023 | GeneBody/5'UTR/1st intron | ZBTB5      | -5.276±0.438 | -5.606±0.419 | 6.61E-04 |
| cg04094160 | 9 | 37465717 | TSS1500                   | ZBTB5      | -4.545±0.376 | -4.838±0.343 | 4.02E-04 |
| cg18428373 | 9 | 37651257 | GeneBody/5'UTR/1st intron | FRMPD1     | -4.79±0.473  | -5.218±0.507 | 9.15E-05 |
| cg26233529 | 9 | 37801319 | GeneBody/1st exon         | DCAF10     | -5.327±0.376 | -5.698±0.636 | 1.82E-04 |
| cg22498840 | 9 | 37903528 | GeneBody/1st intron       | SLC25A51   | -4.599±0.307 | -4.869±0.44  | 3.54E-04 |
| cg03738959 | 9 | 37904295 | GeneBody/5'UTR/1st exon   | SLC25A51   | -5.343±0.453 | -5.615±0.498 | 6.78E-03 |
| cg25478603 | 9 | 38392535 | TSS200                    | ALDH1B1    | -2.472±0.287 | -2.275±0.469 | 6.59E-03 |
| cg22397447 | 9 | 38392975 | GeneBody/5'UTR/1st intron | ALDH1B1    | -4.755±0.526 | -5.267±0.62  | 4.43E-05 |
| cg26776077 | 9 | 65493891 | GeneBody/1st exon         | FAM74A4    | 1.918±0.19   | 2.092±0.276  | 2.20E-04 |
| cg21413251 | 9 | 71320693 | GeneBody/5'UTR/1st intron | PIP5K1B    | -5.423±0.458 | -5.748±0.547 | 1.93E-03 |
| cg21185421 | 9 | 71394810 | TSS200                    | FAM122A    | -6.215±0.597 | -6.793±0.525 | 2.44E-05 |
| cg11274211 | 9 | 71395330 | GeneBody/1st exon         | FAM122A    | -4.514±0.255 | -4.864±0.411 | 7.08E-07 |
| cg18505908 | 9 | 72287123 | GeneBody/5'UTR/1st exon   | APBA1      | -4.826±0.417 | -5.099±0.469 | 3.51E-03 |
| cg15623573 | 9 | 72288098 | TSS1500                   | APBA1      | -3.852±0.27  | -4.115±0.407 | 1.19E-04 |
| cg11656547 | 9 | 72658747 | GeneBody/5'UTR/1st exon   | MAMDC2     | -2.608±0.337 | -2.811±0.443 | 9.88E-03 |
| cg21740204 | 9 | 72873544 | GeneBody/1st exon         | SMC5-AS1   | -5.162±0.656 | -5.55±0.623  | 6.03E-03 |
| cg26798786 | 9 | 73029388 | GeneBody/5'UTR/1st exon   | KLF9       | -4.562±0.654 | -5.127±0.691 | 1.58E-04 |
| cg20555507 | 9 | 73736452 | GeneBody/5'UTR/1st exon   | TRPM3      | -2.93±0.21   | -3.173±0.32  | 9.38E-06 |
| cg01873645 | 9 | 74526649 | GeneBody/5'UTR/1st exon   | C9orf85    | -4.996±0.326 | -5.201±0.315 | 3.74E-03 |
| cg23788167 | 9 | 74979561 | TSS200                    | ZFAND5     | -4.396±0.468 | -4.778±0.756 | 1.34E-03 |
| cg16601861 | 9 | 75568007 | GeneBody/5'UTR/1st exon   | ALDH1A1    | -3.334±0.375 | -3.551±0.425 | 9.70E-03 |
| cg07536920 | 9 | 77112326 | GeneBody/5'UTR/1st exon   | RORB       | -4.866±0.342 | -5.096±0.321 | 1.93E-03 |
| cg18168989 | 9 | 77644250 | TSS1500                   | C9orf41    | 3.474±0.286  | 3.657±0.22   | 2.42E-03 |
| cg08625022 | 9 | 77702606 | GeneBody/1st intron       | NMRK1      | -4.755±0.473 | -5.028±0.494 | 8.32E-03 |
| cg25287375 | 9 | 77703619 | GeneBody/1st exon         | OSTF1      | -4.9±0.434   | -5.413±0.491 | 1.89E-06 |
| cg16904306 | 9 | 78506294 | GeneBody/1st intron       | PCSK5      | -6.647±0.531 | -5.106±0.527 | 1.38E-04 |
| cg13789236 | 9 | 79009433 | GeneBody/5'UTR/1st exon   | RFK        | -3.708±0.275 | -3.91±0.561  | 9.21E-03 |
| cg13066542 | 9 | 79009738 | TSS1500                   | RFK        | -5.152±0.349 | -5.473±0.511 | 2.18E-04 |

|            |   |           |                           |            |              |              |          |
|------------|---|-----------|---------------------------|------------|--------------|--------------|----------|
| cg09885086 | 9 | 79074210  | GeneBody/5'UTR/1st exon   | GCNT1      | -4.906±0.365 | -5.141±0.389 | 3.54E-03 |
| cg25418831 | 9 | 79792647  | GeneBody/1st exon         | VPS13A-AS1 | -5.089±0.366 | -5.497±0.591 | 2.48E-05 |
| cg06692957 | 9 | 80647629  | TSS1500                   | GNAQ       | -3.968±0.318 | -4.187±0.48  | 5.16E-03 |
| cg12548454 | 9 | 80911457  | TSS1500                   | PSAT1      | -3.676±0.238 | -3.915±0.443 | 2.54E-04 |
| cg25336579 | 9 | 80912260  | GeneBody/1st intron       | PSAT1      | -6.089±0.327 | -6.416±0.697 | 6.43E-04 |
| cg19523029 | 9 | 82186884  | GeneBody/5'UTR/1st exon   | TLE4       | -3.647±0.465 | -4.036±0.455 | 2.03E-04 |
| cg16558348 | 9 | 86322296  | GeneBody/1st intron       | UBQLN1     | -5.483±0.523 | -5.923±0.498 | 1.78E-04 |
| cg00426963 | 9 | 86535755  | GeneBody/5'UTR/1st intron | KIF27      | -4.57±0.557  | -5.11±0.544  | 2.88E-05 |
| cg01809579 | 9 | 86595452  | GeneBody/5'UTR/1st exon   | HNRNPK     | -4.55±0.329  | -4.87±0.557  | 1.12E-04 |
| cg06138027 | 9 | 86596281  | GeneBody/5'UTR/1st intron | RMI1       | -4.402±0.416 | -4.721±0.568 | 1.31E-03 |
| cg09539438 | 9 | 87283789  | GeneBody/5'UTR/1st intron | NTRK2      | -4.408±0.307 | -4.618±0.427 | 4.07E-03 |
| cg23181138 | 9 | 88356705  | GeneBody/5'UTR/1st exon   | AGTPBP1    | -5.795±0.447 | -6.148±0.676 | 1.42E-03 |
| cg18090228 | 9 | 88556685  | GeneBody/5'UTR/1st intron | NAA35      | -4.066±0.335 | -4.252±0.313 | 9.81E-03 |
| cg20263942 | 9 | 88714961  | GeneBody/5'UTR/1st exon   | GOLM1      | -3.229±0.457 | -2.803±0.707 | 2.37E-04 |
| cg14060836 | 9 | 88897456  | GeneBody/5'UTR/1st exon   | ISCA1      | -5.752±0.59  | -6.30±0.761  | 1.17E-04 |
| cg13890487 | 9 | 88897838  | TSS1500                   | ISCA1      | -5.129±0.292 | -5.326±0.357 | 3.35E-03 |
| cg03221676 | 9 | 88969266  | GeneBody/5'UTR/1st exon   | ZCCHC6     | -5.126±0.333 | -5.436±0.472 | 1.59E-04 |
| cg05065037 | 9 | 88969928  | TSS1500                   | ZCCHC6     | -4.034±0.373 | -4.282±0.457 | 3.73E-03 |
| cg08719486 | 9 | 90112101  | TSS1500                   | DAPK1      | -0.58±0.321  | -0.788±0.407 | 5.25E-03 |
| cg13814950 | 9 | 90112515  | TSS1500                   | DAPK1      | -4.369±0.353 | -4.644±0.406 | 6.89E-04 |
| cg22571217 | 9 | 90112519  | TSS1500                   | DAPK1      | -4.574±0.449 | -4.844±0.447 | 5.70E-03 |
| cg25530169 | 9 | 91002900  | TSS1500                   | SPIN1      | -4.623±0.354 | -4.892±0.579 | 2.84E-03 |
| cg14230685 | 9 | 91004214  | GeneBody/5'UTR/1st intron | SPIN1      | -4.166±0.444 | -4.672±0.65  | 9.57E-06 |
| cg03712708 | 9 | 91925885  | TSS1500                   | CKS2       | -4.407±0.347 | -4.694±0.581 | 1.33E-03 |
| cg21912567 | 9 | 92219379  | TSS1500                   | GADD45G    | -4.52±0.242  | -4.657±0.247 | 9.51E-03 |
| cg10708828 | 9 | 94185698  | GeneBody/5'UTR/1st intron | NFIL3      | -5.047±0.318 | -5.299±0.324 | 4.14E-04 |
| cg15919045 | 9 | 94186882  | TSS1500                   | NFIL3      | -5.914±0.41  | -6.186±0.538 | 4.65E-03 |
| cg10912268 | 9 | 94877902  | TSS1500                   | SPTLC1     | -4.169±0.294 | -4.364±0.418 | 5.57E-03 |
| cg07027685 | 9 | 95055737  | GeneBody/5'UTR/1st exon   | IARS       | -3.838±0.542 | -4.335±0.556 | 6.92E-05 |
| cg21624883 | 9 | 95432804  | TSS1500                   | IPPK       | -4.712±0.313 | -5.157±0.502 | 3.35E-07 |
| cg05969697 | 9 | 95527975  | TSS1500                   | BICD2      | -4.727±0.297 | -5.025±0.459 | 9.05E-05 |
| cg09160477 | 9 | 95820913  | TSS200                    | SUSD3      | -4.907±0.348 | -5.238±0.597 | 3.12E-04 |
| cg21925493 | 9 | 95858671  | GeneBody/1st intron       | C9orf89    | -4.819±0.508 | -5.183±0.577 | 1.55E-03 |
| cg10072995 | 9 | 95895956  | GeneBody/1st intron       | NINJ1      | -4.528±0.424 | -5.07±0.59   | 1.12E-06 |
| cg08872483 | 9 | 96213189  | TSS1500                   | FAM120A    | -5.135±0.533 | -5.523±0.512 | 9.51E-04 |
| cg20684399 | 9 | 96338308  | TSS1500                   | PHF2       | -4.267±0.321 | -4.616±0.401 | 1.01E-05 |
| cg01401337 | 9 | 96339159  | GeneBody/1st intron       | PHF2       | -5.478±0.703 | -5.881±0.671 | 7.76E-03 |
| cg09429111 | 9 | 96792562  | TSS1500                   | PTPDC1     | -4.036±0.334 | -4.24±0.337  | 5.27E-03 |
| cg03704393 | 9 | 97042001  | GeneBody                  | ZNF169     | 3.214±0.199  | 3.394±0.286  | 2.49E-04 |
| cg26759551 | 9 | 97401509  | GeneBody/1st exon         | FBP1       | -4.499±0.319 | -4.776±0.423 | 2.95E-04 |
| cg17814481 | 9 | 97402166  | TSS1500                   | FBP1       | -3.599±0.701 | -4.015±0.662 | 5.91E-03 |
| cg25910443 | 9 | 97488953  | GeneBody/5'UTR/1st exon   | C9orf3     | -5.201±0.401 | -5.795±0.678 | 2.08E-07 |
| cg04021421 | 9 | 98080622  | TSS1500                   | FANCC      | 3.078±0.291  | 3.262±0.219  | 2.52E-03 |
| cg12043807 | 9 | 99180432  | GeneBody/5'UTR/1st exon   | ZNF367     | -5.064±0.366 | -5.429±0.607 | 1.40E-04 |
| cg08372326 | 9 | 99212096  | TSS1500                   | HABP4      | -5.62±0.423  | -5.885±0.465 | 4.87E-03 |
| cg15739944 | 9 | 99212660  | GeneBody/1st exon         | HABP4      | -4.569±0.31  | -4.843±0.485 | 4.87E-04 |
| cg02936872 | 9 | 99801550  | GeneBody/5'UTR/1st exon   | CTSV       | -4.994±0.336 | -5.239±0.456 | 2.21E-03 |
| cg00429618 | 9 | 99962350  | 0                         | 0          | -2.392±0.308 | -2.653±0.293 | 1.59E-04 |
| cg10900550 | 9 | 100173984 | TSS1500                   | TDRD7      | -3.206±0.22  | -3.337±0.174 | 4.37E-03 |
| cg14414534 | 9 | 100286483 | GeneBody                  | TMOD1      | 3.777±0.249  | 3.955±0.319  | 2.20E-03 |
| cg16199381 | 9 | 100396477 | TSS1500                   | TSD2       | -4.503±0.488 | -4.876±0.55  | 7.76E-04 |
| cg07965714 | 9 | 100459834 | TSS200                    | XPA        | -4.943±0.364 | -5.324±0.447 | 1.77E-05 |
| cg10421561 | 9 | 100745105 | TSS1500                   | ANP32B     | -4.525±0.424 | -4.979±0.492 | 9.78E-06 |
| cg12026394 | 9 | 100745975 | GeneBody/1st intron       | ANP32B     | -5.335±0.472 | -5.716±0.573 | 5.40E-04 |
| cg25479216 | 9 | 100818684 | TSS1500                   | NANS       | -5.132±0.426 | -5.416±0.415 | 2.28E-03 |
| cg01429996 | 9 | 100819542 | GeneBody/1st intron       | NANS       | -3.661±0.474 | -3.977±0.408 | 1.83E-03 |
| cg02827328 | 9 | 100881403 | GeneBody/1st exon         | TRIM14     | -5.653±0.579 | -6.165±0.573 | 1.02E-04 |
| cg23075568 | 9 | 100955349 | TSS1500                   | CORO2A     | -5.663±0.51  | -5.95±0.453  | 7.99E-03 |
| cg01725199 | 9 | 101569990 | GeneBody/1st exon         | GALNT12    | -5.189±0.629 | -5.709±0.646 | 2.58E-04 |
| cg15492003 | 9 | 101984308 | TSS200                    | ALG2       | -5.666±0.51  | -6.163±0.567 | 3.69E-05 |
| cg25454755 | 9 | 102584145 | GeneBody/5'UTR/1st exon   | NR4A3      | -4.443±0.341 | -4.837±0.513 | 9.12E-06 |
| cg21606237 | 9 | 102668725 | GeneBody/1st intron       | LOC441461  | -4.235±0.338 | -4.471±0.477 | 3.64E-03 |
| cg03950009 | 9 | 102669115 | GeneBody/5'UTR/1st intron | STX17      | -4.782±0.577 | -5.115±0.574 | 7.80E-03 |
| cg08347423 | 9 | 102861153 | GeneBody/5'UTR/1st exon   | ERP44      | -5.311±0.604 | -5.85±0.563  | 8.13E-05 |
| cg23043438 | 9 | 103115132 | GeneBody/5'UTR/1st exon   | TEX10      | -5.809±0.591 | -6.379±0.582 | 3.17E-05 |
| cg16771596 | 9 | 103188942 | TSS1500                   | MSANTD3    | -4.145±0.308 | -4.383±0.422 | 1.23E-03 |
| cg19318511 | 9 | 103189158 | TSS1500                   | MSANTD3    | -4.245±0.611 | -4.786±0.508 | 7.47E-05 |
| cg15075170 | 9 | 103236030 | GeneBody/1st intron       | TMEFF1     | -3.999±0.29  | -4.195±0.396 | 4.37E-03 |
| cg21746459 | 9 | 104160900 | GeneBody/5'UTR/1st exon   | MRPL50     | -5.456±0.601 | -5.907±0.573 | 6.77E-04 |
| cg21893220 | 9 | 106856376 | TSS200                    | SMC2       | -5.412±0.451 | -5.984±0.561 | 8.09E-07 |
| cg07328495 | 9 | 106856765 | TSS200                    | SMC2       | -4.321±0.444 | -4.8±0.607   | 1.68E-05 |
| cg20109151 | 9 | 107509821 | TSS200                    | NIPSNAP3A  | -5.189±0.369 | -5.671±0.545 | 9.75E-07 |
| cg24329374 | 9 | 107510068 | GeneBody/5'UTR/1st exon   | NIPSNAP3A  | -5.601±0.408 | -5.98±0.482  | 8.62E-05 |
| cg17868994 | 9 | 107526283 | TSS200                    | NIPSNAP3B  | -3.953±0.788 | -4.444±0.687 | 3.52E-03 |
| cg22778947 | 9 | 108211064 | GeneBody/1st intron       | FSD1L      | -2.168±0.333 | -2.463±0.485 | 3.54E-04 |
| cg16998207 | 9 | 108320178 | TSS1500                   | FKTN       | -4.648±0.282 | -4.843±0.302 | 1.92E-03 |
| cg04725234 | 9 | 108456639 | TSS200                    | TMEM38B    | -4.389±0.31  | -4.639±0.513 | 1.65E-03 |
| cg25483839 | 9 | 110044887 | TSS1500                   | RAD23B     | -3.565±0.519 | -3.996±0.419 | 1.58E-04 |
| cg03939688 | 9 | 110251706 | GeneBody/5'UTR/1st exon   | KLF4       | -4.555±0.538 | -5.119±0.58  | 1.13E-05 |
| cg07309102 | 9 | 110251826 | GeneBody/5'UTR/1st exon   | KLF4       | -4.509±0.562 | -4.935±0.811 | 1.80E-03 |
| cg19863405 | 9 | 111619070 | TSS1500                   | ACTL7B     | 1.784±0.251  | 1.936±0.258  | 5.56E-03 |
| cg00065385 | 9 | 111623395 | TSS1500                   | ACTL7A     | 3.193±0.227  | 3.345±0.32   | 5.01E-03 |
| cg07281640 | 9 | 111695707 | GeneBody/5'UTR/1st intron | IKBKAP     | -4.81±0.415  | -5.236±0.467 | 1.76E-05 |
| cg05414225 | 9 | 111696926 | GeneBody/1st intron       | FAM206A    | -4.215±0.196 | -4.361±0.263 | 1.71E-03 |
| cg12568776 | 9 | 112083456 | TSS1500                   | EPB41L4B   | -5.033±0.503 | -5.651±0.643 | 1.55E-06 |
| cg15083233 | 9 | 112810402 | TSS1500                   | AKAP2      | -2.627±0.353 | -2.877±0.378 | 1.53E-03 |
| cg26246296 | 9 | 113018794 | GeneBody/5'UTR/1st exon   | TXN        | -5.217±0.471 | -5.487±0.442 | 7.62E-03 |
| cg22174355 | 9 | 114413582 | GeneBody                  | DNAJC25    | 3.291±0.268  | 3.5±0.251    | 4.39E-04 |
| cg05120715 | 9 | 114659593 | GeneBody/1st exon         | UGCG       | -4.105±0.334 | -4.444±0.386 | 2.33E-05 |
| cg08313788 | 9 | 115095520 | TSS1500                   | PTBP3      | -5.193±0.501 | -5.533±0.627 | 3.25E-03 |
| cg04837322 | 9 | 115096481 | TSS1500                   | PTBP3      | -4.198±0.369 | -4.492±0.503 | 8.59E-04 |
| cg10726357 | 9 | 115653543 | TSS1500                   | SLC46A2    | 0.333±0.174  | 0.442±0.223  | 6.50E-03 |
| cg06252382 | 9 | 115913783 | GeneBody/1st intron       | SLC31A2    | -5.186±0.559 | -5.66±0.565  | 1.80E-04 |
| cg15865742 | 9 | 115984268 | GeneBody/5'UTR/1st intron | SLC31A1    | -2.448±0.346 | -1.973±0.493 | 3.50E-07 |
| cg18474135 | 9 | 116038303 | GeneBody/1st intron       | PRPF4      | -4.124±0.39  | -4.426±0.491 | 9.51E-04 |

|            |   |           |                           |            |              |              |          |
|------------|---|-----------|---------------------------|------------|--------------|--------------|----------|
| cg05375800 | 9 | 116102362 | GeneBody/5'UTR/1st intron | WDR31      | -4.263±0.204 | -4.512±0.361 | 1.05E-05 |
| cg00885506 | 9 | 116102792 | TSS200                    | WDR31      | -3.666±0.407 | -3.939±0.52  | 3.83E-03 |
| cg03984733 | 9 | 116139085 | TSS1500                   | HDHD3      | -4.992±0.636 | -5.393±0.525 | 2.89E-03 |
| cg27510871 | 9 | 116173074 | TSS200                    | POLE3      | -5.774±0.573 | -6.183±0.534 | 1.10E-03 |
| cg19944367 | 9 | 116223775 | GeneBody                  | RG53       | 3.008±0.24   | 3.193±0.374  | 2.05E-03 |
| cg23916845 | 9 | 117268172 | TSS1500                   | DFNB31     | -4.246±0.326 | -4.613±0.39  | 4.98E-06 |
| cg12377712 | 9 | 117349993 | GeneBody/5'UTR/1st exon   | ATP6V1G1   | -5.13±0.378  | -5.431±0.542 | 1.09E-03 |
| cg10791260 | 9 | 117568588 | TSS200                    | TNFSF15    | -3.345±0.351 | -3.608±0.359 | 8.00E-04 |
| cg00213714 | 9 | 119449370 | GeneBody/5'UTR/1st exon   | ASTN2      | -4.107±0.366 | -4.371±0.321 | 8.77E-04 |
| cg00121640 | 9 | 120176515 | GeneBody/1st intron       | ASTN2      | -3.04±0.22   | -3.206±0.338 | 2.37E-03 |
| cg12024292 | 9 | 120177979 | TSS1500                   | ASTN2      | -3.092±0.287 | -3.274±0.402 | 7.62E-03 |
| cg02515422 | 9 | 120466493 | GeneBody/5'UTR/1st exon   | TLR4       | -2.04±0.365  | -3.917±0.391 | 6.92E-03 |
| cg12576700 | 9 | 123342680 | TSS1500                   | CDK5RAP2   | -4.82±0.492  | -5.285±0.596 | 7.31E-05 |
| cg16956268 | 9 | 123342682 | TSS1500                   | CDK5RAP2   | -3.739±0.269 | -3.939±0.249 | 7.31E-04 |
| cg11429632 | 9 | 123964581 | TSS1500                   | RAB14      | -4±0.605     | -4.428±0.609 | 1.34E-03 |
| cg18676053 | 9 | 124133094 | TSS1500                   | STOM       | 1.662±0.225  | 1.924±0.29   | 3.94E-06 |
| cg07981910 | 9 | 124461412 | GeneBody                  | DAB2IP     | -6.003±0.521 | -6.435±0.559 | 2.77E-04 |
| cg14063008 | 9 | 124461599 | GeneBody                  | DAB2IP     | -4.82±0.562  | -5.175±0.449 | 2.80E-03 |
| cg27650175 | 9 | 124461640 | GeneBody                  | DAB2IP     | -5.955±0.878 | -6.612±0.528 | 4.03E-04 |
| cg27218220 | 9 | 124856396 | TSS1500                   | TLL11      | 2.304±0.294  | 2.578±0.359  | 9.05E-05 |
| cg07347725 | 9 | 124921437 | GeneBody/1st intron       | NDUFA8     | -3.823±0.504 | -4.136±0.488 | 4.25E-03 |
| cg25186211 | 9 | 124921565 | GeneBody/1st intron       | NDUFA8     | -3.973±0.273 | -4.25±0.407  | 6.33E-05 |
| cg01536400 | 9 | 124923283 | GeneBody/1st intron       | MORN5      | 2.657±0.235  | 2.857±0.253  | 2.09E-04 |
| cg00636639 | 9 | 125027249 | TSS200                    | RBM18      | -4.66±0.325  | -5.021±0.643 | 9.82E-05 |
| cg12927153 | 9 | 125133318 | GeneBody/5'UTR/1st exon   | PTGS1      | -5.121±0.421 | -5.495±0.52  | 1.74E-04 |
| cg09768944 | 9 | 125590709 | GeneBody/5'UTR/1st intron | PDCL       | -3.938±0.32  | -4.241±0.491 | 1.92E-04 |
| cg13625113 | 9 | 125675579 | GeneBody/5'UTR/1st exon   | ZBTB6      | -3.512±0.246 | -3.674±0.323 | 4.76E-03 |
| cg01677177 | 9 | 125693677 | GeneBody/5'UTR/1st intron | ZBTB26     | -3.389±0.203 | -3.521±0.221 | 3.27E-03 |
| cg17896097 | 9 | 125693949 | TSS200                    | ZBTB26     | -4.758±0.497 | -5.103±0.481 | 1.50E-03 |
| cg21489873 | 9 | 125877134 | GeneBody/1st exon         | MIR600HG   | 2.452±0.16   | 2.585±0.257  | 1.09E-03 |
| cg25902460 | 9 | 126030596 | GeneBody/1st exon         | STRBP      | -3.565±0.313 | -3.207±0.605 | 5.39E-05 |
| cg25118574 | 9 | 127177646 | GeneBody/1st exon         | PSMB7      | -4.211±0.309 | -4.417±0.279 | 1.97E-03 |
| cg15806518 | 9 | 127177817 | TSS200                    | PSMB7      | -4.213±0.609 | -4.597±0.594 | 3.74E-03 |
| cg16666160 | 9 | 127269631 | GeneBody/5'UTR/1st exon   | NR5A1      | 5.467±0.314  | 5.673±0.423  | 5.50E-03 |
| cg08173535 | 9 | 127533861 | TSS1500                   | NR6A1      | -3.63±0.329  | -3.838±0.415 | 6.08E-03 |
| cg03916787 | 9 | 127624708 | TSS1500                   | RPL35      | -3.152±0.301 | -3.425±0.377 | 1.44E-04 |
| cg12788471 | 9 | 127630977 | TSS1500                   | ARPC5L     | -5.676±0.465 | -6.043±0.583 | 7.52E-04 |
| cg11797883 | 9 | 127631644 | GeneBody/1st exon         | ARPC5L     | -5.263±0.503 | -5.693±0.711 | 4.59E-04 |
| cg09227136 | 9 | 127703617 | TSS1500                   | GOLGA1     | -5.827±0.562 | -6.172±0.551 | 4.69E-03 |
| cg03801144 | 9 | 127951957 | GeneBody/1st exon         | PPP6C      | -4.983±0.265 | -5.178±0.277 | 1.02E-03 |
| cg26753512 | 9 | 127962481 | TSS1500                   | RABEPK     | -4.06±0.444  | -4.337±0.467 | 4.77E-03 |
| cg18453621 | 9 | 129376904 | GeneBody/1st intron       | LMX1B      | -4.329±0.598 | -4.686±0.735 | 9.09E-03 |
| cg10805447 | 9 | 129567355 | GeneBody/5'UTR/1st exon   | ZBTB43     | -4.828±0.297 | -5.083±0.37  | 2.72E-04 |
| cg16284292 | 9 | 129567924 | GeneBody/5'UTR/1st intron | ZBTB43     | -4.174±0.271 | -4.387±0.405 | 1.45E-03 |
| cg18360149 | 9 | 130186444 | TSS1500                   | ZNF79      | -5.172±0.348 | -5.464±0.438 | 3.81E-04 |
| cg05840553 | 9 | 130212635 | GeneBody                  | RPL12      | -4.625±0.447 | -4.999±0.405 | 1.77E-04 |
| cg15648905 | 9 | 130212957 | GeneBody                  | RPL12      | -4.698±0.443 | -4.955±0.416 | 6.79E-03 |
| cg10188131 | 9 | 130214136 | GeneBody/5'UTR/1st exon   | LRSAM1     | -5.193±0.524 | -5.593±0.596 | 8.34E-04 |
| cg00560119 | 9 | 130374109 | TSS1500                   | STXBP1     | -4.512±0.558 | -4.831±0.538 | 8.15E-03 |
| cg21753834 | 9 | 130477671 | GeneBody/1st intron       | PTRH1      | -4.586±0.346 | -5.02±0.595  | 5.24E-06 |
| cg24121001 | 9 | 130478378 | GeneBody/5'UTR/1st exon   | TTC16      | -2.364±0.298 | -2.07±0.344  | 3.48E-05 |
| cg11973688 | 9 | 130564956 | TSS200                    | FPGS       | -5.331±0.321 | -5.626±0.352 | 8.02E-05 |
| cg07295092 | 9 | 130565376 | TSS200                    | FPGS       | -4.891±0.474 | -5.412±0.551 | 6.73E-06 |
| cg09092161 | 9 | 130639739 | GeneBody/5'UTR/1st intron | AK1        | -4.758±0.618 | -5.391±0.646 | 1.48E-05 |
| cg04416752 | 9 | 130679027 | GeneBody/5'UTR/1st intron | ST6GALNAC4 | -4.447±0.476 | -4.799±0.508 | 1.01E-03 |
| cg09665592 | 9 | 130699885 | GeneBody/1st intron       | DPM2       | -4.44±0.334  | -4.799±0.48  | 2.34E-05 |
| cg09729918 | 9 | 130830948 | GeneBody/1st intron       | SLC25A25   | -4.793±0.435 | -5.154±0.353 | 1.61E-04 |
| cg10218959 | 9 | 130890202 | GeneBody/5'UTR/1st intron | PTGES2     | -4.077±0.466 | -4.417±0.551 | 1.45E-03 |
| cg13901134 | 9 | 130923133 | GeneBody/1st intron       | C9orf16    | -5.182±0.442 | -5.579±0.538 | 1.40E-04 |
| cg25590938 | 9 | 131038362 | TSS200                    | SWI5       | -3.928±0.263 | -4.086±0.29  | 6.68E-03 |
| cg19857538 | 9 | 131085530 | GeneBody                  | COQ4       | -4.359±0.278 | -4.637±0.369 | 4.56E-05 |
| cg12076344 | 9 | 131102607 | TSS1500                   | SLC27A4    | -5.123±0.576 | -5.833±0.681 | 1.09E-06 |
| cg11116440 | 9 | 131133274 | TSS1500                   | URM1       | -4.332±0.285 | -4.65±0.322  | 4.98E-06 |
| cg19324791 | 9 | 131182496 | TSS1500                   | CERCAM     | -4.907±0.484 | -5.191±0.493 | 7.09E-03 |
| cg27627570 | 9 | 131183239 | GeneBody/1st exon         | CERCAM     | -5.782±0.605 | -6.207±0.588 | 1.38E-03 |
| cg08923379 | 9 | 131218452 | GeneBody/1st exon         | ODF2       | -5.818±0.531 | -6.339±0.533 | 2.59E-05 |
| cg13294509 | 9 | 131266872 | TSS200                    | GLE1       | -3.212±0.458 | -3.489±0.591 | 9.01E-03 |
| cg11007123 | 9 | 131314542 | TSS1500                   | SPTAN1     | -4.793±0.629 | -5.324±0.526 | 1.37E-04 |
| cg03243895 | 9 | 131314908 | GeneBody/5'UTR/1st exon   | SPTAN1     | -5.452±0.546 | -5.897±0.614 | 3.93E-04 |
| cg11628487 | 9 | 131450973 | TSS1500                   | SET        | -4.057±0.317 | -4.331±0.331 | 1.60E-04 |
| cg18088324 | 9 | 131452443 | GeneBody/1st intron       | SET        | -5.914±0.627 | -6.268±0.615 | 8.98E-03 |
| cg11056832 | 9 | 131465146 | GeneBody/5'UTR/1st exon   | PKN3       | -4.705±0.395 | -5.054±0.424 | 1.27E-04 |
| cg17617223 | 9 | 131534466 | TSS1500                   | ZER1       | -5.128±0.494 | -5.568±0.549 | 1.24E-04 |
| cg18773223 | 9 | 131549619 | GeneBody/5'UTR/1st exon   | TBC1D13    | -3.911±0.257 | -4.173±0.329 | 2.96E-05 |
| cg00228799 | 9 | 131580591 | TSS200                    | ENDOG      | -4.456±0.449 | -4.84±0.447  | 1.58E-04 |
| cg04621255 | 9 | 131581398 | GeneBody/1st exon         | ENDOG      | -5.291±0.412 | -5.564±0.551 | 4.75E-03 |
| cg00475955 | 9 | 131592049 | GeneBody/1st exon         | C9orf114   | -5.416±0.587 | -6.06±0.778  | 1.10E-05 |
| cg15610792 | 9 | 131592173 | TSS200                    | C9orf114   | -5.129±0.383 | -5.414±0.448 | 1.14E-03 |
| cg13752043 | 9 | 131644109 | GeneBody/5'UTR/1st intron | CCBL1      | -4.276±0.286 | -4.628±0.489 | 6.97E-06 |
| cg16898150 | 9 | 131644556 | GeneBody/5'UTR/1st intron | LRRc8A     | -5.927±0.539 | -6.509±0.54  | 6.00E-06 |
| cg13812587 | 9 | 131709471 | TSS1500                   | NUP188     | -4.423±0.329 | -4.694±0.478 | 7.91E-04 |
| cg09431062 | 9 | 131790499 | GeneBody/5'UTR/1st exon   | SH3GLB2    | -5.401±0.373 | -5.961±0.613 | 1.32E-07 |
| cg11526405 | 9 | 131790894 | TSS1500                   | SH3GLB2    | -4.027±0.554 | -4.436±0.537 | 8.14E-04 |
| cg00729541 | 9 | 131798577 | TSS1500                   | FAM73B     | -4.27±0.336  | -4.611±0.421 | 3.10E-05 |
| cg01027739 | 9 | 131842738 | TSS1500                   | DOLPP1     | -3.565±0.386 | -3.838±0.418 | 1.65E-03 |
| cg26805528 | 9 | 131872542 | GeneBody/1st intron       | CRAT       | -1.588±0.118 | -1.769±0.208 | 1.36E-07 |
| cg18197998 | 9 | 131873514 | TSS200                    | PPP2R4     | -4.282±0.279 | -4.628±0.289 | 7.90E-05 |
| cg15852879 | 9 | 132404411 | GeneBody/5'UTR/1st exon   | ASB6       | -4.877±0.414 | -5.345±0.691 | 2.46E-05 |
| cg02205739 | 9 | 132427570 | TSS1500                   | PRRX2      | -4.825±0.449 | -5.15±0.424  | 9.79E-04 |
| cg14299800 | 9 | 132564053 | TSS1500                   | TOR1B      | 2.966±0.193  | 3.09±0.202   | 3.54E-03 |
| cg21060854 | 9 | 132565518 | GeneBody/1st exon         | TOR1B      | -5.737±0.591 | -6.403±0.627 | 3.53E-06 |
| cg02802055 | 9 | 132597094 | GeneBody/1st intron       | C9orf78    | -4.74±0.561  | -5.07±0.521  | 6.01E-03 |
| cg25179291 | 9 | 132805739 | TSS1500                   | FNBP1      | -4.759±0.342 | -4.969±0.379 | 5.85E-03 |
| cg05045528 | 9 | 132815702 | TSS1500                   | GPR107     | -3.879±0.476 | -4.23±0.545  | 1.19E-03 |
| cg06615667 | 9 | 132816229 | GeneBody/1st exon         | GPR107     | -4.24±0.314  | -4.52±0.506  | 4.21E-04 |

|             |    |           |                           |          |              |              |          |
|-------------|----|-----------|---------------------------|----------|--------------|--------------|----------|
| cg22791453  | 9  | 133319899 | TSS200                    | ASS1     | -2.371±0.447 | -2.08±0.431  | 2.76E-03 |
| cg23282771  | 9  | 133320279 | GeneBody/5'UTR/1st exon   | ASS1     | -4.246±0.312 | -4.569±0.52  | 8.60E-05 |
| cg03900284  | 9  | 133769695 | TSS1500                   | QRFP     | 1.559±0.21   | 1.727±0.252  | 5.69E-04 |
| cg26964989  | 9  | 133884294 | TSS1500                   | LAMC3    | -2.963±0.213 | -3.187±0.323 | 4.30E-05 |
| cg25954354  | 9  | 133971548 | TSS1500                   | AIF1L    | -3.162±0.374 | -3.555±0.4   | 1.11E-05 |
| cg12998491  | 9  | 134152531 | TSS1500                   | FAM78A   | -6.033±0.593 | -6.451±0.802 | 2.90E-03 |
| cg27024922  | 9  | 134378058 | TSS1500                   | POMT1    | -3.601±0.307 | -3.796±0.464 | 9.87E-03 |
| cg26228569  | 9  | 134955334 | TSS200                    | MED27    | -4.321±0.356 | -4.522±0.317 | 7.68E-03 |
| cg12085225  | 9  | 135230256 | GeneBody/5'UTR/1st intron | SETX     | -5.592±0.666 | -6.256±0.723 | 2.14E-05 |
| cg14176475  | 9  | 135282081 | GeneBody/5'UTR/1st intron | TTF1     | -4.161±0.508 | -4.507±0.551 | 2.25E-03 |
| cg25344672  | 9  | 135285207 | TSS1500                   | C9orf171 | 0.445±0.182  | 0.647±0.272  | 1.66E-05 |
| cg12622986  | 9  | 135458173 | GeneBody/5'UTR/1st exon   | BARHL1   | -2.537±0.334 | -2.766±0.463 | 3.93E-03 |
| cg20603424  | 9  | 135545631 | TSS200                    | GTF3C4   | -5.823±0.472 | -6.241±0.507 | 1.22E-04 |
| cg17961200  | 9  | 135937572 | GeneBody/1st intron       | CEL      | 2.978±0.182  | 3.161±0.341  | 2.49E-04 |
| cg01169778  | 9  | 136038690 | GeneBody/5'UTR/1st intron | GBGT1    | 0.746±0.337  | 0.973±0.38   | 2.73E-03 |
| cg15538820  | 9  | 136084818 | TSS200                    | OBP2B    | 4.282±0.267  | 4.466±0.374  | 3.91E-03 |
| cg17083853  | 9  | 136222913 | GeneBody                  | SURF1    | -5.532±0.646 | -6.017±0.679 | 8.10E-04 |
| cg25512587  | 9  | 136344026 | GeneBody/1st intron       | SLC2A6   | -3.31±0.199  | -3.538±0.362 | 3.31E-05 |
| cg14201417  | 9  | 136400057 | GeneBody/5'UTR/1st intron | ADAMTSL2 | -3.828±0.328 | -4.026±0.411 | 8.68E-03 |
| cg25020204  | 9  | 136500234 | TSS1500                   | DBH      | 0.964±0.146  | 1.057±0.193  | 6.14E-03 |
| cg07824742  | 9  | 136501784 | GeneBody/1st exon         | DBH      | 5.699±0.412  | 6.064±0.381  | 8.53E-05 |
| cg11466485  | 9  | 136605868 | TSS1500                   | SARDH    | 2.903±0.291  | 3.093±0.214  | 1.85E-03 |
| cg13134662  | 9  | 136858680 | TSS1500                   | VAV2     | -3.693±0.256 | -3.951±0.332 | 3.60E-05 |
| cg04648440  | 9  | 136932424 | GeneBody/5'UTR/1st intron | BRD3     | -3.117±0.212 | -2.87±0.281  | 4.26E-06 |
| cg03243700  | 9  | 137000940 | TSS1500                   | WDR5     | -5.574±0.751 | -6.344±0.725 | 1.18E-05 |
| cg10604703  | 9  | 137001737 | GeneBody/5'UTR/1st intron | WDR5     | -3.48±0.298  | -3.788±0.681 | 7.08E-04 |
| cg16408394  | 9  | 137219075 | GeneBody/1st intron       | RXRA     | -4.614±0.298 | -4.972±0.462 | 5.66E-06 |
| cg15769409  | 9  | 138372274 | GeneBody/5'UTR/1st intron | PPP1R26  | -3.943±0.316 | -4.157±0.384 | 3.19E-03 |
| cg22587514  | 9  | 138392051 | TSS1500                   | C9orf116 | -4.916±0.382 | -5.448±0.549 | 2.65E-07 |
| cg26224139  | 9  | 138393760 | GeneBody                  | MRPS2    | 2.398±0.254  | 2.686±0.324  | 5.46E-06 |
| cg23815000  | 9  | 138413012 | TSS1500                   | LCN1     | 1.744±0.264  | 1.587±0.285  | 7.07E-03 |
| cg10248727  | 9  | 138413324 | GeneBody/5'UTR/1st exon   | LCN1     | 1.777±0.182  | 1.927±0.242  | 5.64E-04 |
| cg03264414  | 9  | 138453697 | GeneBody/1st exon         | PAEP     | 1.87±0.283   | 2.116±0.33   | 1.93E-04 |
| cg20414506  | 9  | 138775936 | GeneBody/1st intron       | CAMSAP1  | 2.311±0.316  | 2.118±0.422  | 9.09E-03 |
| cg09446127  | 9  | 138853438 | TSS1500                   | UBAC1    | -3.885±0.393 | -4.117±0.461 | 8.74E-03 |
| cg15229026  | 9  | 138853493 | TSS1500                   | UBAC1    | -3.434±0.442 | -4.038±0.582 | 2.43E-07 |
| cg04305913  | 9  | 139228912 | GeneBody                  | GPSM1    | 2.067±0.142  | 2.223±0.301  | 1.86E-04 |
| cg24793265  | 9  | 139269240 | TSS1500                   | CARD9    | 2.139±0.225  | 2.306±0.26   | 1.14E-03 |
| cg20776317  | 9  | 139292793 | GeneBody/1st exon         | SNAPC4   | 2.34±0.201   | 2.59±0.333   | 4.98E-06 |
| cg08367703  | 9  | 139304491 | GeneBody/1st intron       | SDCCAG3  | -5.385±0.464 | -5.665±0.611 | 9.75E-03 |
| cg21559783  | 9  | 139378129 | GeneBody/5'UTR/1st exon   | SEC16A   | -4.122±0.308 | -4.486±0.477 | 7.50E-06 |
| cg06654447  | 9  | 139686019 | GeneBody/1st intron       | TMEM141  | -4.703±0.24  | -4.997±0.42  | 8.81E-06 |
| cg17963089  | 9  | 139743185 | TSS200                    | PHPT1    | -4.227±0.46  | -4.608±0.52  | 3.24E-04 |
| cg16777839  | 9  | 139743802 | GeneBody/5'UTR/1st exon   | PHPT1    | -4.641±0.506 | -5.007±0.636 | 1.83E-03 |
| cg25068445  | 9  | 139780417 | TSS1500                   | TRAF2    | -4.808±0.354 | -5.027±0.347 | 4.42E-03 |
| cg15139737  | 9  | 139839391 | TSS200                    | FBXW5    | -4.93±0.304  | -5.125±0.429 | 7.16E-03 |
| cg13493001  | 9  | 139846100 | TSS1500                   | LCN12    | 1.636±0.183  | 1.768±0.19   | 1.26E-03 |
| cg00563932  | 9  | 139871049 | TSS1500                   | PTGDS    | 1.339±0.231  | 1.477±0.298  | 9.84E-03 |
| cg15428653  | 9  | 139923402 | TSS200                    | ABCA2    | -3.358±0.281 | -3.136±0.359 | 7.63E-04 |
| cg15733507  | 9  | 139965275 | TSS1500                   | SAPCD2   | -4.838±0.491 | -5.362±0.535 | 8.82E-06 |
| cg03261004  | 9  | 139981660 | GeneBody/1st exon         | MAN1B1   | -5.174±0.307 | -5.579±0.541 | 2.66E-06 |
| cg22419075  | 9  | 140008995 | GeneBody                  | DPP7     | -5.147±0.612 | -5.681±0.675 | 1.57E-04 |
| cg07172280  | 9  | 140009455 | TSS1500                   | DPP7     | -4.83±0.394  | -5.165±0.397 | 1.74E-04 |
| cg03109047  | 9  | 140032686 | TSS1500                   | GRIN1    | -3.909±0.222 | -4.048±0.205 | 3.55E-03 |
| cg27291231  | 9  | 140081916 | TSS1500                   | SSNA1    | 1.882±0.207  | 2.072±0.3    | 2.08E-04 |
| cg03804500  | 9  | 140081972 | TSS1500                   | SSNA1    | 3.653±0.296  | 3.485±0.313  | 9.80E-03 |
| cg06886022  | 9  | 140095555 | TSS1500                   | TPRN     | -4.298±0.399 | -3.963±0.405 | 2.11E-04 |
| cg22719586  | 9  | 140099722 | GeneBody/1st exon         | TMEM203  | -5.113±0.477 | -5.449±0.539 | 1.83E-03 |
| cg23897067  | 9  | 140100305 | GeneBody/1st exon         | NDOR1    | -5.806±0.42  | -6.092±0.446 | 2.09E-03 |
| cg02068676  | 9  | 140149483 | TSS1500                   | NELFB    | -5.727±0.542 | -6.055±0.555 | 5.64E-03 |
| cg03168296  | 9  | 140317011 | GeneBody/5'UTR/1st intron | EXD3     | -4.18±0.375  | -4.495±0.36  | 1.88E-04 |
| cg007772309 | 9  | 140353475 | GeneBody/1st intron       | NSMF     | -5.855±0.448 | -6.509±0.643 | 1.11E-07 |
| cg02813021  | 10 | 180599    | GeneBody/5'UTR/1st exon   | ZMYND11  | -5.331±0.465 | -5.79±0.492  | 2.67E-05 |
| cg14255089  | 10 | 180755    | GeneBody/5'UTR/1st exon   | ZMYND11  | -3.701±0.198 | -3.855±0.305 | 1.86E-03 |
| cg08907850  | 10 | 1094976   | GeneBody/5'UTR/1st exon   | ID1      | -5.099±0.309 | -5.496±0.492 | 2.15E-06 |
| cg08020381  | 10 | 1095554   | TSS1500                   | ID1      | -4.918±0.579 | -5.284±0.588 | 3.91E-03 |
| cg27274028  | 10 | 1102313   | TSS1500                   | WDR37    | -5.418±0.525 | -5.819±0.511 | 5.88E-04 |
| cg05307923  | 10 | 1779667   | GeneBody/5'UTR/1st exon   | ADARB2   | -4.64±0.308  | -4.821±0.37  | 9.56E-03 |
| cg14590817  | 10 | 1779730   | TSS200                    | ADARB2   | -4.181±0.266 | -4.433±0.414 | 2.01E-04 |
| cg08465862  | 10 | 3109459   | TSS1500                   | PFKP     | -4.522±0.479 | -4.812±0.436 | 4.68E-03 |
| cg10247268  | 10 | 3109799   | GeneBody/1st exon         | PFKP     | -4.943±0.382 | -5.286±0.534 | 2.41E-04 |
| cg20587968  | 10 | 5406423   | TSS1500                   | UCN3     | 0.626±0.176  | 0.739±0.21   | 4.62E-03 |
| cg26644395  | 10 | 5407020   | GeneBody/5'UTR/1st exon   | UCN3     | -0.136±0.31  | -0.336±0.36  | 4.29E-03 |
| cg25171089  | 10 | 5708825   | TSS1500                   | ASB13    | -5.195±0.55  | -5.758±0.761 | 4.00E-05 |
| cg03157149  | 10 | 5855170   | GeneBody/1st intron       | GDI2     | -6.172±0.598 | -6.698±0.544 | 9.33E-05 |
| cg08827391  | 10 | 5855992   | TSS1500                   | GDI2     | -5.252±0.632 | -5.778±0.599 | 2.00E-04 |
| cg17560720  | 10 | 5932700   | GeneBody/5'UTR/1st intron | FBXO18   | -4.638±0.433 | -4.962±0.458 | 8.55E-04 |
| cg08497766  | 10 | 6019877   | GeneBody/5'UTR/1st exon   | IL15RA   | -3.939±0.339 | -4.19±0.521  | 2.82E-03 |
| cg02863237  | 10 | 6131472   | GeneBody/5'UTR/1st exon   | RBM17    | -5.321±0.277 | -5.705±0.447 | 6.18E-07 |
| cg21542094  | 10 | 6243955   | TSS1500                   | PFKFB3   | -4.388±0.573 | -4.788±0.626 | 1.86E-03 |
| cg14222233  | 10 | 6245271   | GeneBody/1st exon         | PFKFB3   | -5.168±0.349 | -5.496±0.49  | 1.35E-04 |
| cg11638200  | 10 | 6621965   | GeneBody/5'UTR/1st intron | PRKCQ    | -5.149±0.343 | -5.385±0.39  | 2.28E-03 |
| cg02962299  | 10 | 7829899   | GeneBody/1st exon         | KIN      | -6.15±0.616  | -6.716±0.515 | 4.56E-05 |
| cg03205208  | 10 | 7830848   | GeneBody/1st intron       | ATP5C1   | -3.53±0.194  | -3.691±0.217 | 3.13E-04 |
| cg20716064  | 10 | 11652950  | GeneBody/5'UTR/1st intron | USP6NL   | -5.099±0.451 | -5.427±0.505 | 1.28E-03 |
| cg13904771  | 10 | 11865163  | TSS1500                   | PROSER2  | -4.512±0.292 | -4.716±0.398 | 3.24E-03 |
| cg04745698  | 10 | 12084977  | TSS200                    | UPF2     | -5.705±0.542 | -6.102±0.496 | 8.09E-04 |
| cg15563952  | 10 | 12110679  | TSS1500                   | DHTKD1   | -4.011±0.474 | -4.379±0.617 | 1.02E-03 |
| cg14461963  | 10 | 12111049  | GeneBody/1st exon         | DHTKD1   | -4.287±0.266 | -4.641±0.375 | 5.90E-07 |
| cg13430851  | 10 | 12237037  | TSS1500                   | CDC123   | -2.891±0.493 | -3.35±0.53   | 6.23E-05 |
| cg06109724  | 10 | 12237553  | TSS1500                   | CDC123   | -4.154±0.238 | -4.315±0.217 | 1.80E-03 |
| cg09906488  | 10 | 12391008  | TSS1500                   | CAMK1D   | -5.467±0.463 | -5.748±0.476 | 5.58E-03 |
| cg27555776  | 10 | 13141832  | TSS1500                   | OPTN     | -4.878±0.356 | -5.17±0.429  | 4.44E-04 |
| cg13864877  | 10 | 13142132  | GeneBody/5'UTR/1st exon   | OPTN     | -5.062±0.291 | -5.29±0.481  | 2.17E-03 |
| cg11115427  | 10 | 13342610  | TSS1500                   | PHYH     | -2.513±0.33  | -2.762±0.436 | 1.36E-03 |

|            |    |          |                           |                   |              |              |          |
|------------|----|----------|---------------------------|-------------------|--------------|--------------|----------|
| cg26778908 | 10 | 13629255 | GeneBody/1st intron       | <i>PRPF18</i>     | -3.998±0.221 | -4.165±0.398 | 4.52E-03 |
| cg03737135 | 10 | 14879645 | GeneBody/1st intron       | <i>CDNF</i>       | -3.843±0.331 | -4.078±0.464 | 2.97E-03 |
| cg10957200 | 10 | 14880574 | GeneBody/1st intron       | <i>HSPA14</i>     | -4.968±0.417 | -5.443±0.613 | 1.03E-05 |
| cg12042678 | 10 | 14920910 | GeneBody/5'UTR/1st exon   | <i>SUV39H2</i>    | -5.434±0.425 | -5.721±0.652 | 6.29E-03 |
| cg07903860 | 10 | 14995957 | GeneBody/5'UTR/1st exon   | <i>DCLRE1C</i>    | -4.179±0.352 | -4.388±0.356 | 6.52E-03 |
| cg04785461 | 10 | 14996236 | TSS200                    | <i>DCLRE1C</i>    | -5.166±0.39  | -5.55±0.638  | 1.50E-04 |
| cg13417824 | 10 | 15139785 | TSS1500                   | <i>C10orf111</i>  | -5.073±0.389 | -5.466±0.562 | 5.81E-05 |
| cg00260778 | 10 | 15140412 | TSS1500                   | <i>C10orf111</i>  | 0.341±0.343  | 0.095±0.405  | 1.65E-03 |
| cg04451988 | 10 | 15412706 | GeneBody/1st intron       | <i>FAM171A1</i>   | -5.346±0.603 | -5.821±0.698 | 6.12E-04 |
| cg13492340 | 10 | 15762222 | TSS1500                   | <i>ITGA8</i>      | -3.493±0.245 | -3.645±0.281 | 5.51E-03 |
| cg05499853 | 10 | 15902324 | GeneBody/5'UTR/1st exon   | <i>FAM188A</i>    | -5.245±0.628 | -5.838±0.713 | 5.86E-05 |
| cg15875120 | 10 | 15902605 | TSS200                    | <i>FAM188A</i>    | -4.439±0.514 | -4.783±0.509 | 2.27E-03 |
| cg11175310 | 10 | 16859107 | GeneBody/5'UTR/1st intron | <i>RSU1</i>       | -4.068±0.308 | -4.321±0.476 | 1.03E-03 |
| cg15293750 | 10 | 17243266 | GeneBody/1st intron       | <i>TRDMT1</i>     | -5.276±0.32  | -5.593±0.41  | 4.63E-05 |
| cg12874092 | 10 | 17271519 | GeneBody                  | <i>VIM</i>        | -5.633±0.487 | -6.247±0.724 | 1.93E-06 |
| cg08198102 | 10 | 17658575 | GeneBody/1st intron       | <i>PTPLA</i>      | -3.69±0.38   | -3.941±0.353 | 2.34E-03 |
| cg23868119 | 10 | 17659726 | TSS1500                   | <i>PTPLA</i>      | -4.422±0.22  | -4.559±0.269 | 6.69E-03 |
| cg26577945 | 10 | 17686098 | TSS200                    | <i>STAM</i>       | -5.02±0.38   | -5.382±0.348 | 3.18E-05 |
| cg18418503 | 10 | 17686274 | GeneBody/1st exon         | <i>STAM</i>       | -4.762±0.352 | -5.186±0.477 | 2.70E-06 |
| cg08400019 | 10 | 18940404 | GeneBody/5'UTR/1st exon   | <i>NSUN6</i>      | -4.065±0.315 | -4.385±0.46  | 5.61E-05 |
| cg10601939 | 10 | 18948058 | TSS1500                   | <i>ARL5B</i>      | -5.286±0.431 | -5.759±0.575 | 1.15E-05 |
| cg16905311 | 10 | 18948399 | GeneBody/5'UTR/1st exon   | <i>ARL5B</i>      | -4.983±0.542 | -5.34±0.506  | 2.35E-03 |
| cg03076324 | 10 | 22292468 | GeneBody/5'UTR/1st exon   | <i>DNAJC1</i>     | -5.674±0.46  | -6.118±0.574 | 5.91E-05 |
| cg21226861 | 10 | 22605339 | GeneBody/5'UTR/1st exon   | <i>COMMD3</i>     | -4.968±0.286 | -5.152±0.405 | 7.18E-03 |
| cg13379871 | 10 | 22610507 | GeneBody/5'UTR/1st exon   | <i>BMI1</i>       | -5.804±0.525 | -6.136±0.514 | 3.64E-03 |
| cg23820285 | 10 | 23003250 | GeneBody/1st exon         | <i>PIP4K2A</i>    | -5.976±0.523 | -6.401±0.484 | 2.57E-04 |
| cg17431739 | 10 | 23384047 | TSS1500                   | <i>MSRB2</i>      | -2.723±0.295 | -2.945±0.435 | 2.08E-03 |
| cg24995798 | 10 | 25305002 | GeneBody/5'UTR/1st exon   | <i>ENKUR</i>      | -3.982±0.406 | -4.329±0.442 | 2.05E-04 |
| cg17665193 | 10 | 26506008 | GeneBody/1st intron       | <i>GAD2</i>       | -3.564±0.267 | -3.773±0.438 | 2.10E-03 |
| cg23087130 | 10 | 27149668 | GeneBody/1st intron       | <i>ABI1</i>       | -4.755±0.505 | -5.203±0.539 | 1.15E-04 |
| cg17918201 | 10 | 27150106 | TSS200                    | <i>ABI1</i>       | -5.235±0.429 | -5.553±0.411 | 7.72E-04 |
| cg24668150 | 10 | 27389076 | GeneBody/1st exon         | <i>ANKRD26</i>    | -4.415±0.286 | -4.588±0.313 | 6.27E-03 |
| cg17165760 | 10 | 27389408 | GeneBody/5'UTR/1st exon   | <i>ANKRD26</i>    | -4.889±0.657 | -5.436±0.764 | 3.31E-04 |
| cg04865575 | 10 | 27443031 | GeneBody/1st intron       | <i>YME1L1</i>     | -5.545±0.493 | -5.95±0.457  | 2.29E-04 |
| cg03554914 | 10 | 27444905 | GeneBody/1st intron       | <i>MASTL</i>      | -4.555±0.413 | -5.003±0.678 | 4.03E-05 |
| cg04466253 | 10 | 27529581 | GeneBody/1st exon         | <i>ACBD5</i>      | -5.797±0.473 | -6.213±0.504 | 1.30E-04 |
| cg15286905 | 10 | 27530250 | TSS1500                   | <i>ACBD5</i>      | -4.157±0.355 | -4.61±0.471  | 3.63E-04 |
| cg02161900 | 10 | 28035631 | TSS1500                   | <i>MKX</i>        | -2.409±0.205 | -2.538±0.265 | 6.51E-03 |
| cg23163471 | 10 | 30024328 | GeneBody/5'UTR/1st intron | <i>SVIL</i>       | -5.597±0.546 | -5.905±0.469 | 7.59E-03 |
| cg03259469 | 10 | 30025293 | TSS1500                   | <i>SVIL</i>       | -3.902±0.403 | -4.132±0.338 | 6.91E-03 |
| cg03807314 | 10 | 30722678 | TSS1500                   | <i>MAP3K8</i>     | -4.43±0.325  | -4.827±0.561 | 8.59E-06 |
| cg09010998 | 10 | 31608207 | GeneBody/1st exon         | <i>ZEB1</i>       | -4.368±0.464 | -4.698±0.497 | 1.45E-03 |
| cg08012454 | 10 | 32345019 | GeneBody/5'UTR/1st exon   | <i>KIF5B</i>      | -5.287±0.4   | -5.537±0.415 | 4.47E-03 |
| cg01819863 | 10 | 32635814 | GeneBody/5'UTR/1st intron | <i>EPC1</i>       | -6.068±0.731 | -6.795±0.741 | 2.10E-05 |
| cg21879981 | 10 | 32636639 | TSS1500                   | <i>EPC1</i>       | -4.403±0.604 | -5.015±0.521 | 1.20E-05 |
| cg12651014 | 10 | 32735292 | GeneBody/5'UTR/1st exon   | <i>CCDC7</i>      | -4.367±0.434 | -4.663±0.397 | 1.64E-03 |
| cg15147545 | 10 | 33247604 | TSS1500                   | <i>ITGB1</i>      | -5.7±0.409   | -5.958±0.469 | 4.98E-03 |
| cg23093462 | 10 | 35104858 | TSS1500                   | <i>PARD3</i>      | -4.586±0.319 | -4.775±0.346 | 7.50E-03 |
| cg23218877 | 10 | 35536010 | GeneBody/5'UTR/1st exon   | <i>CCNY</i>       | 1.687±0.237  | 1.493±0.253  | 3.24E-04 |
| cg19219503 | 10 | 37414802 | GeneBody/5'UTR/1st exon   | <i>ANKRD30A</i>   | 2.926±0.337  | 3.186±0.479  | 1.41E-03 |
| cg15799959 | 10 | 38146444 | GeneBody/5'UTR/1st exon   | <i>ZNF248</i>     | -4.672±0.484 | -5.061±0.555 | 4.84E-04 |
| cg03208093 | 10 | 38147096 | TSS200                    | <i>ZNF248</i>     | -5.158±0.396 | -5.537±0.421 | 4.20E-05 |
| cg24146166 | 10 | 38265215 | GeneBody/5'UTR/1st intron | <i>ZNF25</i>      | -4.382±0.544 | -4.964±0.53  | 6.58E-06 |
| cg25924032 | 10 | 43278349 | GeneBody/5'UTR/1st intron | <i>BMS1</i>       | -5.155±0.51  | -5.615±0.61  | 1.31E-04 |
| cg05621401 | 10 | 43572065 | TSS1500                   | <i>RET</i>        | -3.424±0.303 | -3.736±0.75  | 1.27E-03 |
| cg27591196 | 10 | 43634329 | GeneBody/5'UTR/1st intron | <i>CSGALNACT2</i> | -4.889±0.513 | -5.178±0.508 | 9.46E-03 |
| cg25081201 | 10 | 43867071 | TSS200                    | <i>FXYD4</i>      | 1.604±0.241  | 1.763±0.341  | 5.84E-03 |
| cg04825431 | 10 | 44063899 | GeneBody/5'UTR/1st exon   | <i>ZNF239</i>     | 2.283±0.148  | 2.493±0.306  | 2.81E-06 |
| cg18435900 | 10 | 44101962 | GeneBody/5'UTR/1st exon   | <i>ZNF485</i>     | -5.641±0.422 | -6.348±0.754 | 2.20E-08 |
| cg26649005 | 10 | 44144023 | GeneBody/5'UTR/1st intron | <i>ZNF32</i>      | -5.431±0.503 | -5.81±0.53   | 7.78E-04 |
| cg14218343 | 10 | 44144641 | TSS1500                   | <i>ZNF32</i>      | -4.212±0.4   | -4.454±0.42  | 6.00E-03 |
| cg13603099 | 10 | 45454574 | GeneBody/1st intron       | <i>TMEM72-AS1</i> | -4.892±0.397 | -5.19±0.433  | 8.90E-04 |
| cg02702510 | 10 | 46090551 | TSS200                    | <i>43898</i>      | -3.27±0.423  | -3.599±0.662 | 1.88E-03 |
| cg22710329 | 10 | 46168446 | TSS200                    | <i>ZFAND4</i>     | -3.977±0.244 | -4.273±0.435 | 1.18E-05 |
| cg12726576 | 10 | 46342455 | GeneBody/1st intron       | <i>AGAP4</i>      | 1.372±0.215  | 1.554±0.25   | 2.61E-04 |
| cg13555884 | 10 | 46344329 | TSS1500                   | <i>AGAP4</i>      | 3.55±0.281   | 3.724±0.268  | 4.21E-03 |
| cg20491707 | 10 | 47083283 | TSS1500                   | <i>NPY4R</i>      | -0.78±0.289  | -0.946±0.254 | 6.97E-03 |
| cg03399459 | 10 | 47747082 | GeneBody/5'UTR/1st exon   | <i>ANXA8L2</i>    | 0.927±0.26   | 1.124±0.262  | 6.67E-04 |
| cg24053375 | 10 | 48392130 | TSS1500                   | <i>RBP3</i>       | 3.284±0.169  | 3.388±0.213  | 7.30E-03 |
| cg05859842 | 10 | 49483356 | TSS1500                   | <i>FRMPD2</i>     | 0.413±0.211  | 0.224±0.342  | 4.89E-04 |
| cg14343062 | 10 | 50746568 | GeneBody/5'UTR/1st intron | <i>ERCC6</i>      | -4.749±0.387 | -5.222±0.521 | 1.98E-06 |
| cg24035962 | 10 | 51572313 | TSS200                    | <i>NCOA4</i>      | -3.798±0.41  | -4.091±0.412 | 1.23E-03 |
| cg25683904 | 10 | 51622198 | GeneBody/1st intron       | <i>TIMM23</i>     | -0.948±0.315 | -0.702±0.414 | 1.01E-03 |
| cg06717104 | 10 | 51623795 | TSS1500                   | <i>TIMM23</i>     | -6.088±0.608 | -6.683±0.632 | 2.86E-05 |
| cg12693634 | 10 | 52384065 | TSS1500                   | <i>SGMS1</i>      | -3.05±0.406  | -2.625±0.68  | 7.85E-05 |
| cg06712026 | 10 | 53459102 | GeneBody/1st exon         | <i>CSTF2T</i>     | -4.404±0.488 | -4.795±0.422 | 3.12E-04 |
| cg18690395 | 10 | 53459536 | TSS200                    | <i>CSTF2T</i>     | -5.723±0.52  | -6.111±0.532 | 8.23E-04 |
| cg03808835 | 10 | 56560945 | GeneBody/5'UTR/1st exon   | <i>PCDH15</i>     | -3.669±0.275 | -3.851±0.428 | 7.67E-03 |
| cg21206959 | 10 | 58120759 | GeneBody/1st intron       | <i>ZWINT</i>      | -4.117±0.198 | -4.434±0.352 | 6.55E-08 |
| cg05250673 | 10 | 60027547 | GeneBody/5'UTR/1st exon   | <i>IPMK</i>       | -5.419±0.538 | -5.785±0.56  | 2.09E-03 |
| cg24573310 | 10 | 60029455 | GeneBody/1st intron       | <i>CISD1</i>      | -5.107±0.517 | -5.588±0.54  | 5.80E-05 |
| cg06532493 | 10 | 60029458 | GeneBody/1st intron       | <i>CISD1</i>      | -4.568±0.387 | -4.918±0.475 | 1.38E-04 |
| cg24631950 | 10 | 60094625 | TSS200                    | <i>UBE2D1</i>     | -4.189±0.374 | -4.427±0.436 | 4.82E-03 |
| cg06077733 | 10 | 60094879 | GeneBody/5'UTR/1st exon   | <i>UBE2D1</i>     | -6.542±0.615 | -7.07±0.688  | 2.02E-04 |
| cg10615091 | 10 | 61122313 | GeneBody/5'UTR/1st exon   | <i>FAM13C</i>     | -4.603±0.371 | -4.873±0.402 | 1.19E-03 |
| cg15984822 | 10 | 61665988 | GeneBody/1st exon         | <i>CCDC6</i>      | -2.702±0.298 | -2.915±0.306 | 1.28E-03 |
| cg25153340 | 10 | 64029004 | TSS1500                   | <i>RTKN2</i>      | -4.112±0.347 | -4.385±0.376 | 5.25E-04 |
| cg01137532 | 10 | 64133888 | TSS200                    | <i>ZNF365</i>     | -4.451±0.373 | -4.854±0.413 | 7.81E-06 |
| cg12452010 | 10 | 64564444 | TSS200                    | <i>ADO</i>        | -3.859±0.261 | -4.041±0.379 | 3.95E-03 |
| cg23680936 | 10 | 64564801 | GeneBody/5'UTR/1st exon   | <i>ADO</i>        | -5.208±0.371 | -5.564±0.457 | 6.17E-05 |
| cg21264207 | 10 | 64576130 | TSS200                    | <i>EGR2</i>       | -4.646±0.322 | -4.994±0.446 | 1.71E-05 |
| cg10234776 | 10 | 64892880 | TSS200                    | <i>NRBF2</i>      | -4.84±0.472  | -5.172±0.441 | 1.27E-03 |
| cg09538287 | 10 | 69456036 | TSS200                    | <i>CTNNA3</i>     | -1.596±0.299 | -1.799±0.327 | 2.39E-03 |
| cg03251249 | 10 | 69645012 | GeneBody/5'UTR/1st exon   | <i>SIRT1</i>      | -5.047±0.583 | -5.387±0.508 | 6.01E-03 |
| cg06134936 | 10 | 69834491 | GeneBody/5'UTR/1st intron | <i>HERC4</i>      | -4.587±0.442 | -4.935±0.384 | 3.36E-04 |

|             |    |          |                           |            |              |              |          |
|-------------|----|----------|---------------------------|------------|--------------|--------------|----------|
| cg03652343  | 10 | 69835287 | TSS200                    | HERC4      | -4.528±0.541 | -4.907±0.66  | 2.33E-03 |
| cg00873937  | 10 | 69991564 | GeneBody/5'UTR/1st exon   | ATOH7      | -4.133±0.297 | -4.33±0.45   | 6.90E-03 |
| cg15342384  | 10 | 70091938 | GeneBody/5'UTR/1st exon   | HNRNP3     | -6.366±0.469 | -6.706±0.479 | 1.10E-03 |
| cg14191109  | 10 | 70287438 | TSS200                    | SLC25A16   | -3.837±0.655 | -4.349±0.607 | 4.14E-04 |
| cg22816171  | 10 | 70660920 | TSS200                    | DDX50      | -3.852±0.332 | -4.174±0.611 | 3.78E-04 |
| cg09164559  | 10 | 70748332 | TSS200                    | KIAA1279   | -3.273±0.448 | -3.54±0.414  | 5.35E-03 |
| cg23345864  | 10 | 70883530 | TSS1500                   | VPS26A     | -4.823±0.263 | -4.971±0.272 | 9.94E-03 |
| cg21830413  | 10 | 70884251 | GeneBody/1st intron       | VPS26A     | -5.061±0.519 | -5.354±0.518 | 9.14E-03 |
| cg05111829  | 10 | 70940483 | GeneBody/1st intron       | SUPV3L1    | -5.055±0.412 | -5.462±0.522 | 4.54E-05 |
| cg06323290  | 10 | 71029879 | GeneBody/5'UTR/1st intron | HK1        | 1.418±0.227  | 1.569±0.273  | 3.55E-03 |
| cg23620639  | 10 | 71561211 | TSS1500                   | COL13A1    | -3.137±0.256 | -3.327±0.339 | 1.63E-03 |
| cg14617642  | 10 | 71812630 | GeneBody/5'UTR/1st exon   | H2AFY2     | -4.948±0.516 | -5.264±0.617 | 6.98E-03 |
| cg12635664  | 10 | 71930586 | TSS1500                   | SAR1A      | -4.243±0.423 | -4.554±0.433 | 9.70E-04 |
| cg11880892  | 10 | 71992660 | GeneBody/1st intron       | PPA1       | -4.204±0.362 | -4.503±0.479 | 5.37E-04 |
| cg15097876  | 10 | 71993604 | TSS1500                   | PPA1       | -4.966±0.339 | -5.368±0.514 | 6.02E-06 |
| cg26869604  | 10 | 72142636 | TSS1500                   | LRRRC20    | -4.629±0.341 | -4.943±0.319 | 5.31E-05 |
| cg19730092  | 10 | 72432797 | GeneBody/1st intron       | ADAMTS14   | 0.371±0.183  | 0.511±0.25   | 1.39E-03 |
| cg18858343  | 10 | 72972901 | GeneBody/1st intron       | UNC5B      | -4.403±0.394 | -4.65±0.485  | 6.26E-03 |
| cg01478450  | 10 | 73079349 | GeneBody/1st intron       | SLC29A3    | -4.284±0.282 | -4.544±0.393 | 1.75E-04 |
| cg24883276  | 10 | 73611008 | GeneBody/5'UTR/1st exon   | PSAP       | -5.919±0.435 | -6.272±0.428 | 3.02E-04 |
| cg14767877  | 10 | 73611073 | GeneBody/5'UTR/1st exon   | PSAP       | -5.715±0.629 | -6.257±0.594 | 1.30E-04 |
| cg03761560  | 10 | 74114860 | GeneBody/5'UTR/1st exon   | DNAJB12    | -5.099±0.326 | -5.583±0.495 | 1.07E-07 |
| cg24701874  | 10 | 74114901 | GeneBody/5'UTR/1st exon   | DNAJB12    | -4.568±0.433 | -4.833±0.431 | 4.98E-03 |
| cg11655691  | 10 | 74385779 | GeneBody/5'UTR/1st exon   | MICU1      | -4.008±0.398 | -4.335±0.645 | 1.26E-03 |
| cg03373080  | 10 | 74452380 | GeneBody/5'UTR/1st exon   | MCU        | -4.369±0.266 | -4.657±0.396 | 2.44E-05 |
| cg20910436  | 10 | 74856386 | GeneBody/5'UTR/1st intron | P4HA1      | -3.844±0.238 | -4.109±0.389 | 2.64E-05 |
| cg21416602  | 10 | 74927745 | GeneBody/5'UTR/1st exon   | ECD        | -5.177±0.315 | -5.566±0.528 | 5.70E-06 |
| cg15427656  | 10 | 74928123 | GeneBody/1st exon         | FAM149B1   | -3.76±0.153  | -3.906±0.17  | 4.86E-05 |
| cg07061913  | 10 | 75006462 | GeneBody                  | DNAJC9     | -4.671±0.439 | -4.975±0.44  | 1.72E-03 |
| cg20441175  | 10 | 75007251 | GeneBody/1st intron       | DNAJC9-AS1 | -4.804±0.349 | -5.11±0.516  | 4.20E-04 |
| cg04733302  | 10 | 75118678 | TSS200                    | TTC18      | -4.282±0.471 | -4.662±0.492 | 3.72E-04 |
| cg04305134  | 10 | 75173374 | GeneBody/5'UTR/1st intron | ANXA7      | -5.354±0.612 | -5.753±0.574 | 2.63E-03 |
| cg08413366  | 10 | 75255930 | TSS200                    | PPP3CB     | -4.702±0.457 | -5.325±0.726 | 7.11E-07 |
| cg08805338  | 10 | 75255936 | TSS200                    | PPP3CB     | -4.995±0.35  | -5.231±0.392 | 2.74E-03 |
| cg21194776  | 10 | 75314128 | GeneBody                  | USP54      | 0.951±0.19   | 1.085±0.248  | 2.76E-03 |
| cg27550918  | 10 | 75410777 | GeneBody/5'UTR/1st exon   | SYNPO2L    | 1.699±0.158  | 1.791±0.188  | 9.72E-03 |
| cg23588893  | 10 | 75532169 | GeneBody/1st exon         | FUT11      | -4.431±0.333 | -4.858±0.544 | 2.61E-06 |
| cg23392730  | 10 | 75541345 | TSS1500                   | CHCHD1     | -2.753±0.553 | -3.089±0.52  | 4.83E-03 |
| cg11993300  | 10 | 75571334 | GeneBody/5'UTR/1st exon   | NDST2      | -5.657±0.531 | -6.055±0.652 | 1.22E-03 |
| cg01078276  | 10 | 75670677 | TSS200                    | PLAU       | -4.219±0.272 | -4.424±0.341 | 1.22E-03 |
| cg25892434  | 10 | 75911181 | GeneBody/1st intron       | ADK        | -4.562±0.302 | -4.963±0.509 | 1.72E-06 |
| cg20721467  | 10 | 76597927 | GeneBody/5'UTR/1st intron | KAT6B      | 0.765±0.153  | 0.922±0.254  | 8.86E-05 |
| cg09454892  | 10 | 76870850 | TSS1500                   | SAMD8      | -0.356±0.189 | -0.502±0.32  | 2.78E-03 |
| cg25229706  | 10 | 76871606 | GeneBody/5'UTR/1st intron | SAMD8      | -4.04±0.281  | -4.347±0.383 | 1.28E-05 |
| cg02437376  | 10 | 76969880 | TSS200                    | VDAC2      | -4.944±0.301 | -5.361±0.478 | 5.82E-07 |
| cg03279443  | 10 | 76971052 | GeneBody/5'UTR            | VDAC2      | -3.918±0.302 | -4.216±0.391 | 5.19E-05 |
| cg08158570  | 10 | 77160935 | TSS1500                   | ZNF503-AS2 | -5.048±0.418 | -5.33±0.52   | 3.43E-03 |
| cg24469803  | 10 | 79789416 | TSS200                    | POLR3A     | -3.29±0.616  | -3.814±0.623 | 1.77E-04 |
| cg10905918  | 10 | 79793527 | GeneBody/5'UTR/1st exon   | RPS24      | -3.797±0.579 | -4.152±0.638 | 5.88E-03 |
| cg23585575  | 10 | 81107083 | TSS200                    | PPIF       | -4.306±0.347 | -4.6±0.327   | 1.66E-04 |
| cg27352063  | 10 | 81107211 | TSS200                    | PPIF       | -5.445±0.457 | -5.712±0.525 | 9.09E-03 |
| cg17470697  | 10 | 81205925 | TSS1500                   | ZCCHC24    | -4.276±0.44  | -4.654±0.509 | 2.18E-04 |
| cg20451369  | 10 | 81838320 | TSS200                    | TMEM254    | -4.905±0.384 | -5.248±0.43  | 1.22E-04 |
| cg03359508  | 10 | 81964782 | TSS1500                   | ANXA11     | -4.403±0.322 | -4.732±0.427 | 3.29E-05 |
| cg24334983  | 10 | 81965683 | TSS1500                   | ANXA11     | -4.682±0.475 | -4.963±0.383 | 4.75E-03 |
| cg01851208  | 10 | 82168043 | TSS200                    | FAM213A    | -3.85±0.294  | -4.097±0.271 | 1.77E-04 |
| cg08772206  | 10 | 82297793 | GeneBody/5'UTR/1st exon   | SH2D4B     | 2.151±0.24   | 2.33±0.305   | 1.41E-03 |
| cg04798796  | 10 | 88855483 | GeneBody/5'UTR/1st intron | FAM35A     | -4.408±0.33  | -4.748±0.569 | 1.12E-04 |
| cg13926569  | 10 | 89418898 | TSS1500                   | PAPSS2     | 1.755±0.262  | 1.974±0.352  | 5.18E-04 |
| cg24552431  | 10 | 89577906 | GeneBody/5'UTR/1st exon   | ATAD1      | -4.311±0.286 | -4.624±0.371 | 1.06E-05 |
| cg01765473  | 10 | 89578168 | GeneBody/1st intron       | CFL1P1     | -5.524±0.408 | -6.03±0.642  | 3.47E-06 |
| cg031228636 | 10 | 89621773 | TSS1500                   | PTEN       | -4.293±0.217 | -4.429±0.248 | 5.45E-03 |
| cg04738091  | 10 | 89622084 | GeneBody/1st exon         | KLLN       | -5.213±0.336 | -5.515±0.42  | 1.60E-04 |
| cg21573601  | 10 | 89622589 | GeneBody/5'UTR/1st exon   | KLLN       | -5.322±0.413 | -5.804±0.528 | 3.58E-06 |
| cg16687447  | 10 | 89623336 | TSS200                    | KLLN       | -6.256±0.697 | -6.898±0.681 | 5.86E-05 |
| cg00098162  | 10 | 90619573 | 0                         | 0          | 2.027±0.189  | 2.145±0.249  | 7.39E-03 |
| cg11917694  | 10 | 90639684 | TSS1500                   | STAMBPL1   | -4.245±0.292 | -4.535±0.399 | 5.65E-05 |
| cg17155596  | 10 | 90640042 | GeneBody/5'UTR/1st exon   | STAMBPL1   | -4.407±0.312 | -4.724±0.466 | 6.26E-05 |
| cg26461637  | 10 | 90750442 | GeneBody/5'UTR/1st exon   | FAS        | -6.115±0.599 | -6.751±0.634 | 8.90E-06 |
| cg23410627  | 10 | 90966807 | GeneBody/1st exon         | CH25H      | -4.05±0.424  | -4.302±0.463 | 7.42E-03 |
| cg18762485  | 10 | 90967165 | TSS200                    | CH25H      | -4.784±0.31  | -5.015±0.301 | 7.48E-04 |
| cg18701598  | 10 | 91011892 | TSS1500                   | LIPA       | -4.688±0.551 | -5.104±0.586 | 7.91E-04 |
| cg09398185  | 10 | 91061902 | GeneBody/1st intron       | IFIT2      | -4.053±0.385 | -4.439±0.535 | 5.47E-05 |
| cg22139878  | 10 | 91174299 | TSS200                    | IFIT5      | -4.933±0.433 | -5.394±0.578 | 1.81E-05 |
| cg05338155  | 10 | 91174651 | GeneBody/1st intron       | IFIT5      | -4.498±0.285 | -4.81±0.373  | 1.08E-05 |
| cg09161592  | 10 | 91405006 | GeneBody/1st exon         | PANK1      | -5.228±0.465 | -5.586±0.525 | 7.33E-04 |
| cg20896197  | 10 | 91461107 | TSS1500                   | KIF20B     | -4.955±0.42  | -5.379±0.485 | 2.47E-05 |
| cg00268338  | 10 | 93169495 | TSS1500                   | HECTD2     | -5.447±0.406 | -5.807±0.433 | 1.19E-04 |
| cg14519036  | 10 | 93558457 | GeneBody/1st exon         | TNKS2      | -5.255±0.57  | -5.628±0.545 | 2.56E-03 |
| cg04350610  | 10 | 93683445 | TSS1500                   | BTAF1      | -5.162±0.429 | -5.489±0.403 | 5.45E-04 |
| cg15965510  | 10 | 93683985 | GeneBody/1st intron       | BTAF1      | -4.509±0.558 | -5.041±0.571 | 4.04E-05 |
| cg16340918  | 10 | 94352700 | TSS200                    | KIF11      | -5.426±0.545 | -5.854±0.625 | 6.23E-04 |
| cg25494789  | 10 | 94353331 | GeneBody/1st intron       | KIF11      | -4.657±0.499 | -5.036±0.498 | 6.45E-04 |
| cg11378840  | 10 | 94449797 | GeneBody/1st exon         | HHEX       | -5.215±0.449 | -5.556±0.647 | 1.79E-03 |
| cg03099492  | 10 | 94833214 | TSS200                    | CYP26A1    | -3.701±0.344 | -3.937±0.421 | 2.74E-03 |
| cg14613832  | 10 | 94833615 | TSS200                    | CYP26A1    | -4.923±0.347 | -5.21±0.423  | 4.21E-04 |
| cg24371383  | 10 | 95256104 | TSS1500                   | CEP55      | -4.972±0.439 | -5.279±0.46  | 1.65E-03 |
| cg19635695  | 10 | 95372445 | GeneBody/5'UTR/1st exon   | PDE6C      | 0.759±0.214  | 0.911±0.284  | 2.51E-03 |
| cg00051979  | 10 | 95462161 | GeneBody/5'UTR/1st exon   | FRA10AC1   | -3.983±0.468 | -4.259±0.485 | 7.03E-03 |
| cg09068993  | 10 | 95462173 | GeneBody/5'UTR/1st exon   | FRA10AC1   | -3.983±0.526 | -4.356±0.614 | 1.83E-03 |
| cg07550278  | 10 | 95462365 | TSS200                    | FRA10AC1   | -4.947±0.526 | -5.359±0.694 | 9.66E-04 |
| cg10830758  | 10 | 95462430 | TSS200                    | FRA10AC1   | -4.058±0.273 | -4.302±0.386 | 2.73E-04 |
| cg08711724  | 10 | 96122379 | GeneBody/1st intron       | NOC3L      | -4.275±0.311 | -4.515±0.483 | 2.04E-03 |
| cg11595245  | 10 | 96305461 | TSS200                    | HELLS      | -4.917±0.489 | -5.265±0.51  | 1.37E-03 |
| cg07489134  | 10 | 96305958 | GeneBody/1st intron       | HELLS      | -4.722±0.386 | -5.035±0.354 | 2.63E-04 |

|            |    |           |                           |           |              |              |          |
|------------|----|-----------|---------------------------|-----------|--------------|--------------|----------|
| cg26822241 | 10 | 96697661  | TSS1500                   | CYP2C9    | 2.454±0.157  | 2.591±0.264  | 7.68E-04 |
| cg20362772 | 10 | 97050690  | GeneBody/5'UTR/1st exon   | PDLIM1    | -5.366±0.477 | -5.856±0.586 | 2.37E-05 |
| cg21235838 | 10 | 97321106  | GeneBody/5'UTR/1st exon   | SORBS1    | -5.565±0.509 | -5.932±0.519 | 1.18E-03 |
| cg12239750 | 10 | 97416566  | GeneBody/5'UTR/1st exon   | ALDH18A1  | -5.455±0.476 | -6.006±0.699 | 7.81E-06 |
| cg22864416 | 10 | 97803525  | GeneBody/5'UTR/1st intron | CCNJ      | -4.878±0.443 | -5.188±0.585 | 2.85E-03 |
| cg16779976 | 10 | 98031125  | GeneBody/1st exon         | BLNK      | -1.227±0.363 | -1.455±0.334 | 3.45E-03 |
| cg02848777 | 10 | 98273714  | TSS200                    | TLL2      | -5.083±0.545 | -5.499±0.509 | 5.44E-04 |
| cg23628240 | 10 | 98591602  | TSS1500                   | LCOR      | -4.624±0.395 | -4.977±0.446 | 1.24E-04 |
| cg07143898 | 10 | 98945300  | GeneBody/1st exon         | SLIT1     | -4.413±0.326 | -4.651±0.408 | 1.70E-03 |
| cg25097676 | 10 | 99051975  | GeneBody/1st intron       | ARHGAP19  | -4.637±0.379 | -4.876±0.36  | 3.51E-03 |
| cg08443351 | 10 | 99052545  | TSS200                    | ARHGAP19  | -4.28±0.39   | -4.631±0.504 | 1.74E-04 |
| cg05013695 | 10 | 99079798  | GeneBody/1st exon         | FRAT1     | -5.277±0.416 | -5.916±0.598 | 3.38E-08 |
| cg27212359 | 10 | 99093810  | GeneBody/1st exon         | FRAT2     | -5.129±0.409 | -5.67±0.592  | 7.38E-07 |
| cg09199317 | 10 | 99095018  | TSS1500                   | FRAT2     | -5.059±0.423 | -5.383±0.448 | 6.60E-04 |
| cg02238747 | 10 | 99161279  | TSS200                    | RRP12     | -2.537±0.217 | -2.765±0.408 | 1.57E-04 |
| cg13669465 | 10 | 99205343  | GeneBody                  | EXOSC1    | -5.492±0.514 | -5.948±0.495 | 9.25E-05 |
| cg09773756 | 10 | 99259519  | GeneBody/1st intron       | UBTD1     | -4.311±0.476 | -4.636±0.507 | 2.12E-03 |
| cg24343515 | 10 | 99400468  | GeneBody/5'UTR/1st exon   | PI4K2A    | -5.811±0.629 | -6.506±0.747 | 6.67E-06 |
| cg19133903 | 10 | 99446953  | GeneBody/5'UTR/1st exon   | AVP1      | -5.154±0.485 | -5.506±0.496 | 1.12E-03 |
| cg09542745 | 10 | 99531164  | GeneBody/1st exon         | SFRP5     | -3.656±0.28  | -3.836±0.417 | 8.28E-03 |
| cg05937453 | 10 | 99531765  | TSS200                    | SFRP5     | -4.664±0.559 | -5.028±0.714 | 5.02E-03 |
| cg04677227 | 10 | 100028320 | TSS1500                   | LOXL4     | -4.618±0.399 | -4.867±0.331 | 3.26E-03 |
| cg13180809 | 10 | 100206399 | GeneBody/5'UTR/1st intron | HPS1      | -3.538±0.225 | -3.779±0.297 | 1.60E-05 |
| cg20340596 | 10 | 100206925 | TSS1500                   | HPS1      | 2.187±0.221  | 2.401±0.307  | 8.62E-05 |
| cg07526069 | 10 | 101190311 | GeneBody/1st exon         | GOT1      | -4.863±0.363 | -5.239±0.434 | 1.88E-05 |
| cg06428195 | 10 | 101191157 | TSS1500                   | GOT1      | -5.316±0.519 | -5.681±0.5   | 1.36E-03 |
| cg14434255 | 10 | 101419627 | GeneBody/5'UTR            | ENTPD7    | -3.89±0.34   | -4.239±0.502 | 5.05E-05 |
| cg17460846 | 10 | 101491598 | TSS1500                   | CUTC      | -4.236±0.332 | -4.54±0.513  | 2.98E-04 |
| cg09070492 | 10 | 101492601 | TSS200                    | COX15     | -4.521±0.35  | -5.007±0.492 | 2.41E-07 |
| cg26610808 | 10 | 102046685 | TSS1500                   | BLOC1S2   | -3.25±0.273  | -3.481±0.371 | 4.63E-04 |
| cg10365880 | 10 | 102089681 | GeneBody/1st exon         | PKD2L1    | 2.223±0.211  | 2.409±0.279  | 2.48E-04 |
| cg00954566 | 10 | 102106405 | TSS1500                   | SCD       | -5.339±0.424 | -5.631±0.426 | 1.76E-03 |
| cg23508052 | 10 | 102106811 | GeneBody/5'UTR/1st exon   | SCD       | -4.621±0.401 | -4.963±0.54  | 3.98E-04 |
| cg01430807 | 10 | 102289786 | TSS200                    | NDUFB8    | -3.986±0.211 | -4.191±0.221 | 3.21E-05 |
| cg07510080 | 10 | 102295549 | TSS200                    | HIF1AN    | -3.588±0.647 | -4.062±0.603 | 8.49E-04 |
| cg08177017 | 10 | 102672368 | GeneBody/5'UTR/1st exon   | FAM178A   | -3.875±0.3   | -4.179±0.395 | 3.69E-05 |
| cg19578398 | 10 | 102747015 | GeneBody/1st intron       | MRPL43    | -3.008±0.244 | -2.593±0.403 | 1.05E-08 |
| cg23190203 | 10 | 102791082 | GeneBody/5'UTR/1st exon   | SFXN3     | -4.955±0.342 | -5.539±0.508 | 8.14E-09 |
| cg19669439 | 10 | 103113668 | TSS200                    | BTRC      | -5.046±0.657 | -5.443±0.592 | 4.72E-03 |
| cg17710288 | 10 | 103543118 | GeneBody/1st exon         | NPM3      | -3.686±0.398 | -3.994±0.541 | 1.22E-03 |
| cg22482381 | 10 | 103578053 | GeneBody/5'UTR/1st exon   | MGEA5     | -4.948±0.356 | -5.281±0.476 | 1.18E-04 |
| cg08242493 | 10 | 103578316 | TSS200                    | MGEA5     | -4.615±0.37  | -4.87±0.352  | 1.64E-03 |
| cg04997967 | 10 | 103603488 | GeneBody/5'UTR/1st exon   | KCNIP2    | -1.82±0.26   | -2.015±0.333 | 1.32E-03 |
| cg02840794 | 10 | 103825777 | GeneBody/1st exon         | HPS6      | -4.283±0.474 | -4.642±0.508 | 7.69E-04 |
| cg27579745 | 10 | 103874495 | GeneBody/5'UTR/1st exon   | LDB1      | -4.6±0.285   | -4.782±0.202 | 2.19E-03 |
| cg10477754 | 10 | 103892376 | TSS1500                   | PPRC1     | -3.739±0.555 | -4.172±0.598 | 5.57E-04 |
| cg26831968 | 10 | 104005242 | TSS200                    | GBF1      | -6.176±0.685 | -6.791±0.652 | 7.82E-05 |
| cg23738770 | 10 | 104154605 | GeneBody/5'UTR/1st intron | NFKB2     | -4.85±0.49   | -5.274±0.602 | 2.46E-04 |
| cg25095612 | 10 | 104155650 | GeneBody/5'UTR/1st exon   | NFKB2     | -4.293±0.512 | -4.656±0.44  | 1.03E-03 |
| cg13548361 | 10 | 104178949 | TSS200                    | PSD       | -3.688±0.34  | -3.944±0.415 | 1.14E-03 |
| cg02040734 | 10 | 104210981 | GeneBody/1st intron       | C10orf95  | -3.541±0.334 | -3.747±0.457 | 9.09E-03 |
| cg26477793 | 10 | 104262085 | GeneBody/1st intron       | ACTR1A    | -5.209±0.466 | -5.484±0.364 | 4.78E-03 |
| cg09888137 | 10 | 104262558 | TSS200                    | ACTR1A    | -5.009±0.468 | -5.28±0.464  | 7.55E-03 |
| cg10488141 | 10 | 104264014 | GeneBody/1st exon         | SUFU      | -5.623±0.453 | -5.975±0.67  | 1.57E-03 |
| cg15109571 | 10 | 104264023 | GeneBody/1st exon         | SUFU      | -4.238±0.298 | -4.423±0.426 | 9.44E-03 |
| cg09405083 | 10 | 104536121 | GeneBody/5'UTR/1st exon   | WBP1L     | -3.069±0.452 | -3.429±0.551 | 6.39E-04 |
| cg05959392 | 10 | 104613928 | TSS200                    | C10orf32  | -4.716±0.441 | -5.235±0.483 | 1.89E-06 |
| cg25729957 | 10 | 104614136 | GeneBody/1st exon         | C10orf32  | -4.322±0.406 | -4.611±0.606 | 3.61E-03 |
| cg24252723 | 10 | 104678150 | GeneBody/5'UTR/1st exon   | CNNM2     | -5.205±0.565 | -5.72±0.616  | 8.62E-05 |
| cg17877656 | 10 | 105110211 | GeneBody/1st intron       | PCGF6     | -4.457±0.281 | -4.717±0.436 | 2.63E-04 |
| cg01360325 | 10 | 105127811 | GeneBody/1st exon         | TAF5      | -5.059±0.457 | -5.508±0.534 | 3.90E-05 |
| cg07086898 | 10 | 105155966 | GeneBody/5'UTR/1st intron | USMG5     | -5.245±0.452 | -5.511±0.361 | 4.97E-03 |
| cg05717160 | 10 | 105156505 | GeneBody/5'UTR/1st intron | PDCD11    | -4.631±0.339 | -4.862±0.274 | 1.42E-03 |
| cg09155001 | 10 | 105218401 | GeneBody/1st exon         | CALHM1    | 2.543±0.226  | 2.748±0.328  | 2.50E-04 |
| cg23333420 | 10 | 105677801 | GeneBody/5'UTR/1st intron | OBFC1     | -5.681±0.384 | -5.981±0.454 | 6.82E-04 |
| cg25294646 | 10 | 105678198 | TSS200                    | OBFC1     | -4.815±0.487 | -5.156±0.49  | 1.53E-03 |
| cg00276797 | 10 | 105726614 | TSS1500                   | SLK       | -4.467±0.408 | -4.752±0.516 | 2.59E-03 |
| cg22391400 | 10 | 105727767 | GeneBody/1st intron       | SLK       | -4.855±0.402 | -5.322±0.49  | 3.18E-06 |
| cg00646492 | 10 | 106014296 | TSS200                    | GSTO1     | -3.094±0.457 | -3.669±0.553 | 8.10E-07 |
| cg26358059 | 10 | 106014893 | GeneBody/1st intron       | GSTO1     | -5.414±0.487 | -5.804±0.652 | 8.06E-04 |
| cg16415058 | 10 | 108923781 | GeneBody/1st exon         | SORCS1    | -2.035±0.225 | -2.239±0.367 | 4.18E-04 |
| cg09770154 | 10 | 111967803 | GeneBody/1st exon         | MXI1      | -5.604±0.465 | -5.942±0.42  | 8.55E-04 |
| cg21872391 | 10 | 112064057 | GeneBody/5'UTR/1st intron | SMNDC1    | -5.037±0.459 | -5.371±0.553 | 1.59E-03 |
| cg08308257 | 10 | 112064994 | TSS1500                   | SMNDC1    | -4.38±0.459  | -4.655±0.552 | 8.23E-03 |
| cg06470552 | 10 | 112327234 | TSS1500                   | SMC3      | -4.798±0.446 | -5.256±0.536 | 2.11E-05 |
| cg11944393 | 10 | 112327600 | GeneBody/1st intron       | SMC3      | -4.669±0.259 | -4.82±0.28   | 8.51E-03 |
| cg24371157 | 10 | 112631335 | TSS1500                   | PDCD4     | -5.088±0.358 | -5.315±0.33  | 3.22E-03 |
| cg16385933 | 10 | 112631792 | GeneBody/5'UTR/1st intron | PDCD4     | -5.497±0.568 | -6.01±0.633  | 1.05E-04 |
| cg16886188 | 10 | 112835859 | TSS1500                   | ADRA2A    | -4.78±0.294  | -5.018±0.425 | 9.61E-04 |
| cg17872476 | 10 | 114205654 | GeneBody/5'UTR/1st intron | ZDHHC6    | 0.766±0.423  | 0.052±0.699  | 1.11E-08 |
| cg18304674 | 10 | 114206557 | GeneBody/5'UTR/1st exon   | ZDHHC6    | -3.082±0.185 | -3.215±0.272 | 1.19E-03 |
| cg09688763 | 10 | 114206798 | GeneBody/5'UTR/1st exon   | VTI1A     | -4.169±0.407 | -4.458±0.529 | 2.37E-03 |
| cg20023578 | 10 | 114709626 | TSS1500                   | TCF7L2    | -3.319±0.325 | -3.714±0.353 | 1.10E-06 |
| cg22906389 | 10 | 115438910 | TSS200                    | CASP7     | -5.348±0.339 | -5.681±0.429 | 5.04E-05 |
| cg02946754 | 10 | 115614308 | TSS200                    | NHLRC2    | -4.994±0.483 | -5.364±0.463 | 5.44E-04 |
| cg13420923 | 10 | 115614712 | GeneBody/1st exon         | NHLRC2    | -5.071±0.437 | -5.442±0.507 | 2.58E-04 |
| cg00568128 | 10 | 115934100 | TSS200                    | MIR2110   | -3.055±0.157 | -3.316±0.321 | 1.21E-07 |
| cg27547703 | 10 | 115939024 | TSS200                    | TDRD1     | 2.428±0.373  | 2.17±0.53    | 4.05E-03 |
| cg13084429 | 10 | 115999021 | GeneBody/5'UTR/1st exon   | VWA2      | -3.38±0.351  | -3.099±0.458 | 7.39E-04 |
| cg26528713 | 10 | 116697973 | GeneBody/5'UTR/1st exon   | TRUB1     | -5.847±0.419 | -6.169±0.433 | 6.07E-04 |
| cg12087643 | 10 | 118033370 | TSS1500                   | GFRA1     | -3.185±0.265 | -2.986±0.325 | 1.15E-03 |
| cg08164900 | 10 | 119134712 | GeneBody/1st exon         | PDZD8     | -5.43±0.376  | -5.938±0.598 | 8.31E-07 |
| cg10222574 | 10 | 119805826 | GeneBody/5'UTR/1st exon   | RAB11FIP2 | -5.026±0.38  | -5.306±0.37  | 8.49E-04 |
| cg24257768 | 10 | 120101984 | TSS200                    | FAM204A   | -3.851±0.344 | -4.198±0.416 | 2.86E-05 |
| cg21289924 | 10 | 120839943 | GeneBody/1st intron       | EIF3A     | -5.599±0.468 | -6.06±0.55   | 3.71E-05 |

|            |    |           |                           |            |              |              |          |
|------------|----|-----------|---------------------------|------------|--------------|--------------|----------|
| cg18755204 | 10 | 120863723 | GeneBody/1st intron       | FAM45B     | -4.976±0.591 | -5.7±0.685   | 1.12E-06 |
| cg10367730 | 10 | 120938495 | TSS200                    | PRDX3      | -4.143±0.365 | -4.438±0.354 | 2.89E-04 |
| cg23182539 | 10 | 121355708 | GeneBody/1st intron       | TIAL1      | -4.798±0.439 | -5.172±0.446 | 1.73E-04 |
| cg08102619 | 10 | 121356777 | TSS1500                   | TIAL1      | -4.529±0.351 | -4.737±0.288 | 4.98E-03 |
| cg27613076 | 10 | 121484944 | TSS1500                   | INPP5F     | -4.036±0.31  | -4.354±0.418 | 3.45E-05 |
| cg24618244 | 10 | 121485763 | GeneBody/5'UTR/1st exon   | INPP5F     | -5.133±0.346 | -5.381±0.402 | 1.65E-03 |
| cg09518735 | 10 | 121632717 | TSS1500                   | MCMBP      | -5.484±0.533 | -5.903±0.508 | 4.05E-04 |
| cg02312170 | 10 | 122610835 | TSS200                    | WDR11-AS1  | -5.275±0.576 | -5.71±0.514  | 5.50E-04 |
| cg05610379 | 10 | 123734658 | GeneBody/1st exon         | NSMCE4A    | -5.387±0.777 | -5.865±0.488 | 2.82E-03 |
| cg14924278 | 10 | 123748922 | GeneBody/5'UTR/1st exon   | TACC2      | 0.399±0.341  | 0.125±0.451  | 7.20E-04 |
| cg23613177 | 10 | 124739793 | GeneBody/5'UTR/1st exon   | PSTK       | -4.935±0.493 | -5.28±0.466  | 1.36E-03 |
| cg03860051 | 10 | 124768608 | GeneBody/1st intron       | ACADSB     | -5.019±0.417 | -5.527±0.729 | 9.51E-06 |
| cg03853151 | 10 | 126107487 | GeneBody/5'UTR/1st exon   | OAT        | -5.512±0.567 | -5.913±0.606 | 1.55E-03 |
| cg02163937 | 10 | 126432368 | GeneBody/5'UTR/1st intron | FAM53B     | -4.78±0.509  | -5.21±0.616  | 3.15E-04 |
| cg19219920 | 10 | 126433331 | TSS1500                   | FAM53B     | -5.243±0.604 | -5.69±0.596  | 8.22E-04 |
| cg09245378 | 10 | 126490406 | GeneBody/1st exon         | FAM175B    | -5.145±0.401 | -5.451±0.464 | 8.61E-04 |
| cg03820909 | 10 | 127407979 | GeneBody/1st intron       | FLJ37035   | -6.126±0.491 | -6.806±0.628 | 1.59E-07 |
| cg24079455 | 10 | 127408106 | GeneBody/5'UTR/1st exon   | C10orf137  | -5.521±0.515 | -5.904±0.58  | 1.05E-03 |
| cg20688340 | 10 | 127464237 | GeneBody/1st exon         | MMP21      | 2.804±0.169  | 2.972±0.318  | 2.98E-04 |
| cg11453347 | 10 | 127512288 | GeneBody/1st exon         | BCCIP      | -4.342±0.358 | -4.674±0.478 | 1.34E-04 |
| cg13434852 | 10 | 128768181 | GeneBody/1st intron       | DOCK1      | 2.702±0.242  | 2.847±0.271  | 7.08E-03 |
| cg20537325 | 10 | 131348421 | GeneBody                  | MGMT       | 2.904±0.268  | 3.143±0.24   | 7.40E-05 |
| cg27056559 | 10 | 131348484 | GeneBody                  | MGMT       | 2.962±0.252  | 3.099±0.214  | 9.95E-03 |
| cg16698623 | 10 | 131412968 | GeneBody                  | MGMT       | 2.385±0.275  | 2.632±0.381  | 2.32E-04 |
| cg17976829 | 10 | 131934431 | TSS1500                   | GLRX3      | -2.591±0.103 | -2.783±0.242 | 4.52E-08 |
| cg21750602 | 10 | 133748026 | GeneBody/1st exon         | PPP2R2D    | 1.563±0.37   | 1.135±0.47   | 3.92E-06 |
| cg17803807 | 10 | 134211104 | GeneBody/1st intron       | PWWP2B     | -3.285±0.401 | -3.583±0.435 | 9.64E-04 |
| cg12390946 | 10 | 134351197 | TSS200                    | INPP5A     | -4.487±0.418 | -4.863±0.579 | 2.35E-04 |
| cg06585108 | 10 | 134671604 | GeneBody                  | TTC40      | 2.901±0.366  | 3.221±0.407  | 1.60E-04 |
| cg19626078 | 10 | 134973796 | TSS200                    | KNDC1      | -4.38±0.432  | -4.741±0.622 | 6.39E-04 |
| cg20472189 | 10 | 135051475 | GeneBody/1st exon         | VENTX      | 1.068±0.157  | 1.174±0.178  | 2.86E-03 |
| cg05658858 | 10 | 135121916 | TSS1500                   | ZNF511     | -5.213±0.438 | -5.621±0.475 | 6.39E-05 |
| cg03366896 | 10 | 135186866 | GeneBody/5'UTR/1st exon   | ECHS1      | -5.707±0.543 | -6.036±0.509 | 4.80E-03 |
| cg12292686 | 10 | 135192102 | TSS1500                   | PAOX       | -4.46±0.309  | -4.693±0.273 | 5.63E-04 |
| cg06463913 | 11 | 207296    | GeneBody/1st intron       | BET1L      | -5.53±0.534  | -6.14±0.615  | 3.55E-06 |
| cg05086873 | 11 | 208948    | GeneBody/1st intron       | RIC8A      | -5.309±0.477 | -5.751±0.475 | 5.66E-05 |
| cg07503829 | 11 | 236309    | GeneBody/5'UTR/1st exon   | SIRT3      | -4.509±0.561 | -4.835±0.549 | 7.15E-03 |
| cg09205751 | 11 | 278394    | TSS200                    | NLRP6      | 1.137±0.225  | 1.311±0.292  | 1.05E-03 |
| cg08843492 | 11 | 308231    | GeneBody/1st exon         | IFITM2     | -2.88±0.381  | -2.546±0.508 | 2.77E-04 |
| cg22963452 | 11 | 312766    | TSS1500                   | IFITM1     | 1.618±0.213  | 1.846±0.335  | 3.69E-05 |
| cg08314660 | 11 | 394199    | TSS200                    | PKP3       | 1.815±0.252  | 1.976±0.326  | 5.68E-03 |
| cg16000888 | 11 | 560951    | TSS200                    | RASSF7     | -4.912±0.572 | -5.502±0.599 | 1.31E-05 |
| cg14896003 | 11 | 562366    | GeneBody                  | RASSF7     | 2.436±0.313  | 2.713±0.378  | 1.72E-04 |
| cg16541031 | 11 | 615519    | GeneBody/5'UTR/1st exon   | IRF7       | -5.096±0.53  | -5.453±0.6   | 2.77E-03 |
| cg16614500 | 11 | 694704    | TSS1500                   | TMEM80     | -2.962±0.414 | -3.32±0.451  | 1.75E-04 |
| cg15498283 | 11 | 747520    | GeneBody/1st exon         | TALDO1     | -5.786±0.6   | -6.144±0.531 | 5.12E-03 |
| cg23660999 | 11 | 777775    | TSS1500                   | PDDC1      | -5.348±0.529 | -5.77±0.654  | 6.36E-04 |
| cg09553358 | 11 | 790184    | TSS200                    | CEND1      | -3.738±0.276 | -4.013±0.421 | 9.03E-05 |
| cg02973416 | 11 | 796069    | GeneBody/5'UTR/1st exon   | SLC25A22   | -4.899±0.435 | -5.151±0.381 | 6.38E-03 |
| cg00185839 | 11 | 804954    | GeneBody/5'UTR/1st intron | PIDD       | -4.392±0.279 | -4.591±0.356 | 2.12E-03 |
| cg03066138 | 11 | 809697    | TSS1500                   | RPLP2      | -5.663±0.492 | -6.013±0.434 | 1.04E-03 |
| cg01485797 | 11 | 810820    | TSS1500                   | SNORA52    | -2.432±0.254 | -2.657±0.378 | 3.59E-04 |
| cg22404646 | 11 | 833345    | GeneBody/5'UTR/1st intron | CD151      | -5.3±0.347   | -5.858±0.675 | 1.32E-07 |
| cg07132517 | 11 | 842517    | GeneBody/5'UTR/1st exon   | POLR2L     | -5.765±0.53  | -6.113±0.64  | 3.97E-03 |
| cg15659828 | 11 | 911673    | TSS1500                   | CHID1      | -3.981±0.37  | -4.359±0.417 | 1.91E-05 |
| cg23121547 | 11 | 1593657   | TSS1500                   | KRTAP5-AS1 | -6.02±0.521  | -6.326±0.632 | 9.59E-03 |
| cg04984200 | 11 | 1784980   | GeneBody/1st intron       | CTSD       | -5.531±0.405 | -5.772±0.478 | 8.38E-03 |
| cg26473272 | 11 | 1856268   | GeneBody/1st intron       | SYT8       | 2.098±0.26   | 2.309±0.307  | 4.59E-04 |
| cg04011872 | 11 | 1868980   | GeneBody/1st intron       | MRPL23     | -4.894±0.426 | -5.237±0.517 | 5.40E-04 |
| cg12322132 | 11 | 2165656   | GeneBody/1st intron       | IGF2-AS    | -4.179±0.272 | -4.399±0.479 | 2.10E-03 |
| cg16817891 | 11 | 2165827   | GeneBody/1st intron       | IGF2-AS    | -4.961±0.405 | -5.201±0.443 | 7.60E-03 |
| cg00613255 | 11 | 2182376   | GeneBody/5'UTR/1st exon   | INS        | 1.937±0.192  | 2.076±0.316  | 4.44E-03 |
| cg04719766 | 11 | 2542580   | GeneBody/1st intron       | KCNQ1      | 2.349±0.225  | 2.48±0.244   | 8.61E-03 |
| cg06233503 | 11 | 2812674   | GeneBody                  | KCNQ1      | -2.055±0.342 | -2.27±0.311  | 3.36E-03 |
| cg16778148 | 11 | 2817922   | GeneBody                  | KCNQ1      | 3.216±0.207  | 3.444±0.365  | 4.75E-05 |
| cg10503232 | 11 | 2891495   | GeneBody/1st exon         | KCNQ1DN    | 1.624±0.261  | 1.806±0.37   | 3.73E-03 |
| cg04548378 | 11 | 2906285   | GeneBody                  | CDKN1C     | -3.331±0.51  | -3.65±0.458  | 3.43E-03 |
| cg05559445 | 11 | 2907674   | TSS1500                   | CDKN1C     | -1.276±0.243 | -1.118±0.31  | 4.85E-03 |
| cg21019522 | 11 | 2920789   | TSS200                    | SLC22A18   | -0.77±0.232  | -0.908±0.24  | 6.67E-03 |
| cg16035277 | 11 | 2923264   | TSS1500                   | SLC22A18   | -2.566±0.164 | -2.394±0.223 | 2.47E-05 |
| cg24139421 | 11 | 2923578   | GeneBody/5'UTR/1st exon   | SLC22A18   | -5.016±0.362 | -5.355±0.488 | 1.22E-04 |
| cg06211616 | 11 | 2923659   | GeneBody/5'UTR/1st intron | SLC22A18   | -3.829±0.282 | -4.046±0.333 | 8.43E-04 |
| cg14415214 | 11 | 2950403   | GeneBody/1st exon         | PHLDA2     | -5.178±0.497 | -5.517±0.637 | 3.38E-03 |
| cg26799802 | 11 | 2951353   | TSS1500                   | PHLDA2     | -3.767±0.329 | -4.136±0.39  | 5.23E-06 |
| cg22479947 | 11 | 3078624   | GeneBody/5'UTR/1st exon   | CARS       | -5.408±0.551 | -5.735±0.481 | 5.23E-03 |
| cg25852715 | 11 | 3121024   | GeneBody                  | OSBPL5     | 3.673±0.219  | 3.808±0.234  | 5.52E-03 |
| cg12970008 | 11 | 3186095   | GeneBody/5'UTR/1st intron | OSBPL5     | -3.624±0.318 | -3.852±0.513 | 4.52E-03 |
| cg26158980 | 11 | 3692187   | GeneBody/1st intron       | CHRNA10    | 2.946±0.185  | 3.21±0.303   | 3.91E-07 |
| cg21743649 | 11 | 3820252   | GeneBody/1st intron       | PGAP2      | 3.116±0.191  | 3.239±0.201  | 3.46E-03 |
| cg21091629 | 11 | 3829534   | TSS1500                   | PGAP2      | -4.554±0.393 | -5.014±0.427 | 1.95E-06 |
| cg02940164 | 11 | 3829971   | GeneBody/1st intron       | PGAP2      | -4.37±0.255  | -4.595±0.425 | 6.75E-04 |
| cg17732521 | 11 | 3863047   | TSS1500                   | RHOG       | -4.429±0.449 | -4.784±0.368 | 2.95E-04 |
| cg01246405 | 11 | 3876562   | TSS1500                   | STIM1      | -2.717±0.317 | -2.336±0.389 | 1.97E-06 |
| cg06349174 | 11 | 3877476   | GeneBody/5'UTR/1st exon   | STIM1      | -4.624±0.303 | -4.887±0.475 | 5.97E-04 |
| cg18678763 | 11 | 4115507   | TSS1500                   | RRM1       | -3.681±0.427 | -4.05±0.545  | 2.76E-04 |
| cg04680304 | 11 | 4116184   | GeneBody/5'UTR/1st exon   | RRM1       | -4.466±0.28  | -4.76±0.468  | 7.25E-05 |
| cg13976366 | 11 | 4414916   | GeneBody/5'UTR/1st exon   | TRIM21     | -4.859±0.462 | -5.137±0.481 | 6.08E-03 |
| cg09983885 | 11 | 4415245   | TSS1500                   | TRIM21     | -2.206±0.367 | -2.43±0.443  | 7.31E-03 |
| cg20609368 | 11 | 5257253   | TSS1500                   | HBD        | 2.767±0.299  | 2.949±0.216  | 3.49E-03 |
| cg20420254 | 11 | 6411394   | TSS1500                   | SMPD1      | -6.016±0.666 | -6.614±0.62  | 7.40E-05 |
| cg19327844 | 11 | 6440482   | TSS200                    | APBB1      | -5.23±0.379  | -5.465±0.37  | 4.23E-03 |
| cg15741583 | 11 | 6461908   | GeneBody                  | HPX        | 0.324±0.241  | 0.135±0.346  | 1.26E-03 |
| cg03756121 | 11 | 6502436   | TSS1500                   | TMM10B     | -3.772±0.196 | -4.034±0.346 | 2.06E-06 |
| cg24975769 | 11 | 6502990   | TSS1500                   | ARFIP2     | -5.256±0.34  | -5.477±0.348 | 3.16E-03 |
| cg16824731 | 11 | 6624409   | GeneBody/1st intron       | RRP8       | -4.367±0.392 | -4.78±0.478  | 1.52E-05 |

|            |    |          |                           |                   |              |              |          |
|------------|----|----------|---------------------------|-------------------|--------------|--------------|----------|
| cg24731756 | 11 | 6625293  | GeneBody/5'UTR/1st exon   | <i>ILK</i>        | -5.414±0.598 | -5.812±0.503 | 1.80E-03 |
| cg17074212 | 11 | 6947622  | TSS200                    | <i>ZNF215</i>     | -3.755±0.421 | -3.319±0.621 | 4.45E-05 |
| cg08558873 | 11 | 7041491  | GeneBody/5'UTR/1st exon   | <i>ZNF214</i>     | -3.962±0.378 | -4.274±0.48  | 4.84E-04 |
| cg24912560 | 11 | 7110561  | GeneBody/1st exon         | <i>RBMXL2</i>     | 1.608±0.457  | 1.88±0.465   | 6.36E-03 |
| cg26198776 | 11 | 8008872  | GeneBody/5'UTR/1st exon   | <i>EIF3F</i>      | -4.562±0.268 | -4.721±0.221 | 4.92E-03 |
| cg12510755 | 11 | 8009096  | GeneBody/1st exon         | <i>EIF3F</i>      | 0.689±0.144  | 0.785±0.127  | 1.84E-03 |
| cg11102794 | 11 | 8285587  | TSS200                    | <i>LMO1</i>       | -3.3±0.301   | -3.544±0.326 | 3.68E-04 |
| cg08788717 | 11 | 8615506  | TSS200                    | <i>STK33</i>      | -5.884±0.536 | -6.272±0.564 | 1.20E-03 |
| cg02171008 | 11 | 8703884  | TSS200                    | <i>RPL27A</i>     | -5.653±0.531 | -6.007±0.418 | 1.65E-03 |
| cg08690721 | 11 | 8932380  | GeneBody/5'UTR/1st exon   | <i>ST5</i>        | -4.44±0.339  | -4.728±0.412 | 2.93E-04 |
| cg16176301 | 11 | 8933372  | GeneBody/1st intron       | <i>AKIP1</i>      | -5.251±0.411 | -5.701±0.566 | 1.36E-05 |
| cg14205126 | 11 | 8985648  | GeneBody/1st intron       | <i>TMEM9B</i>     | -3.57±0.374  | -3.899±0.598 | 5.48E-04 |
| cg17647744 | 11 | 8986217  | TSS200                    | <i>TMEM9B-AS1</i> | -5.647±0.663 | -6.217±0.573 | 1.15E-04 |
| cg09659887 | 11 | 9406115  | TSS200                    | <i>IPO7</i>       | -4.404±0.463 | -4.851±0.601 | 6.81E-05 |
| cg05463705 | 11 | 9482308  | TSS200                    | <i>LOC644656</i>  | -5.105±0.295 | -5.381±0.343 | 7.59E-05 |
| cg25876934 | 11 | 9594280  | TSS1500                   | <i>WEE1</i>       | -3.893±0.375 | -4.143±0.479 | 3.94E-03 |
| cg15044073 | 11 | 9685299  | TSS1500                   | <i>SWAP70</i>     | -4.157±0.338 | -4.507±0.466 | 3.33E-05 |
| cg12228707 | 11 | 10326589 | TSS200                    | <i>ADM</i>        | -5.126±0.385 | -5.366±0.364 | 3.90E-03 |
| cg12320306 | 11 | 10326923 | GeneBody/5'UTR/1st intron | <i>ADM</i>        | -4.03±0.376  | -4.346±0.436 | 2.85E-04 |
| cg03961189 | 11 | 10772649 | TSS200                    | <i>CTR9</i>       | -5.575±0.465 | -5.995±0.603 | 1.68E-04 |
| cg20319405 | 11 | 10830230 | GeneBody/5'UTR/1st intron | <i>EIF4G2</i>     | -5.491±0.386 | -5.775±0.44  | 1.18E-03 |
| cg23948874 | 11 | 10830481 | GeneBody/5'UTR/1st exon   | <i>EIF4G2</i>     | -5.439±0.31  | -5.725±0.395 | 1.20E-04 |
| cg18692596 | 11 | 10879861 | GeneBody/1st exon         | <i>ZBED5-AS1</i>  | -3.831±0.216 | -4.086±0.367 | 1.28E-05 |
| cg22529861 | 11 | 11643697 | TSS200                    | <i>GALNT18</i>    | -4.665±0.408 | -5.004±0.348 | 1.72E-04 |
| cg25985488 | 11 | 11643756 | TSS200                    | <i>GALNT18</i>    | -4.76±0.564  | -5.212±0.519 | 3.07E-04 |
| cg22967016 | 11 | 12131739 | TSS1500                   | <i>MICAL2</i>     | -4.231±0.345 | -4.577±0.466 | 4.82E-05 |
| cg12422683 | 11 | 12132611 | GeneBody/5'UTR/1st intron | <i>MICAL2</i>     | -4.098±0.376 | -4.479±0.522 | 4.64E-05 |
| cg13250711 | 11 | 13298675 | TSS1500                   | <i>ARNTL</i>      | -3.379±0.445 | -3.708±0.58  | 1.64E-03 |
| cg03860400 | 11 | 13485289 | TSS1500                   | <i>BTBD10</i>     | -2.901±0.284 | -2.672±0.432 | 1.18E-03 |
| cg14026971 | 11 | 13690461 | GeneBody/5'UTR/1st intron | <i>FAR1</i>       | -4.632±0.514 | -5.046±0.59  | 4.75E-04 |
| cg21288099 | 11 | 14380330 | TSS1500                   | <i>RRAS2</i>      | -5.797±0.565 | -6.435±0.609 | 3.55E-06 |
| cg23984059 | 11 | 14521548 | TSS200                    | <i>COPB1</i>      | -4.682±0.387 | -4.904±0.303 | 5.98E-03 |
| cg03439703 | 11 | 14664991 | GeneBody/5'UTR/1st intron | <i>PSMA1</i>      | -1.367±0.209 | -1.504±0.258 | 4.42E-03 |
| cg11980188 | 11 | 14914012 | TSS1500                   | <i>CYP2R1</i>     | -4.522±0.489 | -4.822±0.547 | 5.93E-03 |
| cg08466074 | 11 | 16760365 | GeneBody/1st exon         | <i>C11orf58</i>   | -3.146±0.469 | -3.507±0.53  | 7.32E-04 |
| cg05592434 | 11 | 17098772 | GeneBody                  | <i>RPS13</i>      | -1.658±0.323 | -1.904±0.305 | 5.50E-04 |
| cg12575751 | 11 | 17297984 | TSS1500                   | <i>NUCB2</i>      | -5.09±0.384  | -5.472±0.525 | 5.76E-05 |
| cg13185308 | 11 | 17498819 | TSS1500                   | <i>ABCC8</i>      | -0.444±0.275 | -0.281±0.283 | 6.86E-03 |
| cg16519321 | 11 | 17741243 | GeneBody/5'UTR/1st exon   | <i>MYOD1</i>      | -2.471±0.265 | -2.686±0.469 | 2.09E-03 |
| cg18568653 | 11 | 18035350 | TSS1500                   | <i>SERGEF</i>     | -4.624±0.425 | -4.904±0.439 | 2.78E-03 |
| cg12907644 | 11 | 18270341 | TSS200                    | <i>SAA2</i>       | 0.235±0.191  | 0.348±0.202  | 7.32E-03 |
| cg13777411 | 11 | 18343973 | GeneBody/5'UTR/1st exon   | <i>GTF2H1</i>     | -3.902±0.298 | -4.069±0.236 | 7.52E-03 |
| cg13383490 | 11 | 18548806 | TSS1500                   | <i>TSG101</i>     | -4.549±0.372 | -4.893±0.335 | 4.71E-05 |
| cg12626085 | 11 | 18610074 | GeneBody/1st intron       | <i>UEVLD</i>      | -4.954±0.375 | -5.298±0.519 | 1.77E-04 |
| cg08550026 | 11 | 19734588 | TSS1500                   | <i>NAV2</i>       | -3.962±0.374 | -4.164±0.275 | 8.99E-03 |
| cg06675341 | 11 | 20408613 | TSS1500                   | <i>PRMT3</i>      | -4.158±0.403 | -4.452±0.432 | 1.15E-03 |
| cg11784785 | 11 | 20620089 | TSS1500                   | <i>SLC6A5</i>     | -3.193±0.258 | -3.407±0.347 | 5.55E-04 |
| cg20632573 | 11 | 20621341 | GeneBody/1st intron       | <i>SLC6A5</i>     | -3.685±0.27  | -3.997±0.483 | 2.73E-05 |
| cg04270835 | 11 | 22359188 | TSS1500                   | <i>SLC17A6</i>    | -3.483±0.338 | -3.731±0.405 | 1.46E-03 |
| cg06185738 | 11 | 22359868 | GeneBody/5'UTR/1st exon   | <i>SLC17A6</i>    | -4.001±0.348 | -4.27±0.443  | 9.63E-04 |
| cg03794550 | 11 | 22646597 | GeneBody/1st exon         | <i>FANCF</i>      | -4.612±0.363 | -4.901±0.344 | 3.52E-04 |
| cg03822011 | 11 | 22646721 | GeneBody/1st exon         | <i>FANCF</i>      | -5.336±0.394 | -5.619±0.359 | 9.90E-04 |
| cg02235880 | 11 | 22647123 | GeneBody/1st exon         | <i>FANCF</i>      | -3.429±0.24  | -3.575±0.331 | 9.98E-03 |
| cg02300906 | 11 | 22647486 | TSS200                    | <i>FANCF</i>      | -4.724±0.415 | -5.061±0.497 | 4.89E-04 |
| cg12154803 | 11 | 27384596 | GeneBody/1st exon         | <i>CCDC34</i>     | -4.905±0.561 | -5.338±0.594 | 6.17E-04 |
| cg14927277 | 11 | 28129967 | GeneBody/5'UTR/1st exon   | <i>METTL15</i>    | -3.573±0.213 | -3.805±0.343 | 3.29E-05 |
| cg15183083 | 11 | 30038310 | GeneBody/5'UTR/1st exon   | <i>KCNA4</i>      | -2.373±0.227 | -2.529±0.325 | 4.33E-03 |
| cg09906309 | 11 | 30344399 | TSS1500                   | <i>ARL14EP</i>    | -3.495±0.274 | -3.673±0.343 | 4.88E-03 |
| cg12743894 | 11 | 30344937 | GeneBody/5'UTR/1st intron | <i>ARL14EP</i>    | -6.59±0.678  | -7.156±0.573 | 1.58E-04 |
| cg06790862 | 11 | 30601783 | GeneBody/1st intron       | <i>MPPED2</i>     | 2.721±0.257  | 2.537±0.297  | 1.62E-03 |
| cg07278207 | 11 | 31391293 | GeneBody/5'UTR/1st exon   | <i>DCDC1</i>      | -5.515±0.637 | -5.883±0.548 | 6.37E-03 |
| cg11385473 | 11 | 31530943 | GeneBody/5'UTR/1st intron | <i>IMMP1L</i>     | -3.714±0.488 | -4.028±0.407 | 2.41E-03 |
| cg10583382 | 11 | 31531364 | GeneBody/1st exon         | <i>ELP4</i>       | -5.383±0.57  | -5.894±0.475 | 6.30E-05 |
| cg25563456 | 11 | 32456069 | GeneBody/1st intron       | <i>WT1</i>        | -3.819±0.302 | -4.106±0.444 | 1.43E-04 |
| cg18788872 | 11 | 32605728 | GeneBody/1st intron       | <i>EIF3M</i>      | -4.844±0.338 | -5.168±0.46  | 9.40E-05 |
| cg14609458 | 11 | 32851177 | TSS1500                   | <i>PRRG4</i>      | -5.083±0.343 | -5.388±0.446 | 2.07E-04 |
| cg25409040 | 11 | 33183343 | GeneBody/1st intron       | <i>CSTF3-AS1</i>  | -4.774±0.547 | -5.222±0.616 | 3.65E-04 |
| cg27345286 | 11 | 33796106 | TSS200                    | <i>FBXO3</i>      | -5.188±0.623 | -5.564±0.566 | 4.79E-03 |
| cg03445474 | 11 | 34073002 | TSS1500                   | <i>CAPRIN1</i>    | -4.505±0.467 | -4.806±0.601 | 5.50E-03 |
| cg16218377 | 11 | 34073324 | GeneBody/5'UTR/1st exon   | <i>CAPRIN1</i>    | -5.916±0.583 | -6.433±0.653 | 1.33E-04 |
| cg06513075 | 11 | 34126714 | TSS1500                   | <i>NAT10</i>      | -4.485±0.473 | -4.767±0.454 | 5.73E-03 |
| cg19072037 | 11 | 34127281 | GeneBody/5'UTR/1st exon   | <i>NAT10</i>      | -4.893±0.296 | -5.268±0.429 | 1.57E-06 |
| cg20728639 | 11 | 34379053 | GeneBody/1st exon         | <i>ABTB2</i>      | -5.058±0.41  | -5.487±0.569 | 2.88E-05 |
| cg24088639 | 11 | 34937564 | TSS200                    | <i>PDHX</i>       | -4.7±0.41    | -4.983±0.366 | 1.38E-03 |
| cg20869710 | 11 | 34938234 | TSS1500                   | <i>APIP</i>       | -5.268±0.424 | -5.601±0.413 | 4.32E-04 |
| cg20143092 | 11 | 35160330 | TSS200                    | <i>CD44</i>       | -2.681±0.176 | -2.898±0.295 | 5.99E-06 |
| cg17640322 | 11 | 35160462 | GeneBody/5'UTR/1st exon   | <i>CD44</i>       | -5.116±0.456 | -5.517±0.516 | 1.53E-04 |
| cg08606356 | 11 | 35160571 | GeneBody/5'UTR/1st exon   | <i>CD44</i>       | -3.376±0.234 | -3.588±0.283 | 1.30E-04 |
| cg18652941 | 11 | 35160892 | GeneBody/1st exon         | <i>CD44</i>       | -3.843±0.195 | -4.081±0.42  | 5.00E-05 |
| cg08258650 | 11 | 35441900 | TSS1500                   | <i>SLC1A2</i>     | -3.24±0.38   | -3.52±0.427  | 1.13E-03 |
| cg02186948 | 11 | 36310854 | GeneBody/1st intron       | <i>COMMD9</i>     | -4.559±0.313 | -4.926±0.434 | 4.81E-06 |
| cg08871189 | 11 | 36311119 | TSS200                    | <i>COMMD9</i>     | -4.371±0.163 | -4.51±0.203  | 3.24E-04 |
| cg23957424 | 11 | 36532056 | TSS200                    | <i>TRAF6</i>      | -4.481±0.368 | -4.894±0.469 | 6.91E-06 |
| cg07912181 | 11 | 43702277 | GeneBody/5'UTR/1st exon   | <i>HSD17B12</i>   | -6.141±0.615 | -6.612±0.553 | 4.92E-04 |
| cg26478074 | 11 | 43702299 | GeneBody/5'UTR/1st exon   | <i>HSD17B12</i>   | -4.494±0.34  | -4.971±0.461 | 1.60E-07 |
| cg27068170 | 11 | 43702737 | GeneBody/1st intron       | <i>HSD17B12</i>   | -4.72±0.519  | -5.09±0.513  | 1.24E-03 |
| cg24612772 | 11 | 44117021 | TSS200                    | <i>EXT2</i>       | -3.1±0.553   | -3.552±0.582 | 3.20E-04 |
| cg02620470 | 11 | 44117187 | GeneBody/5'UTR/1st exon   | <i>EXT2</i>       | -5.046±0.557 | -5.584±0.524 | 2.84E-05 |
| cg00061629 | 11 | 44325258 | GeneBody/1st intron       | <i>ALX4</i>       | -1.6±0.631   | -1.961±0.651 | 8.92E-03 |
| cg25363445 | 11 | 44326516 | GeneBody/1st intron       | <i>ALX4</i>       | -2.263±0.241 | -2.409±0.263 | 6.21E-03 |
| cg00415164 | 11 | 44327098 | GeneBody/1st intron       | <i>ALX4</i>       | -4.026±0.345 | -4.273±0.47  | 2.53E-03 |
| cg08914623 | 11 | 44327572 | GeneBody/1st intron       | <i>ALX4</i>       | -3.148±0.529 | -3.472±0.627 | 6.88E-03 |
| cg27318318 | 11 | 44332849 | TSS1500                   | <i>ALX4</i>       | -4.014±0.267 | -4.356±0.448 | 3.14E-06 |
| cg06791867 | 11 | 44880944 | GeneBody/5'UTR/1st intron | <i>TSPAN18</i>    | 2.416±0.264  | 2.594±0.281  | 2.33E-03 |
| cg09390792 | 11 | 44881444 | GeneBody/5'UTR/1st intron | <i>TSPAN18</i>    | 2.145±0.175  | 2.253±0.211  | 7.00E-03 |

|            |    |          |                           |                 |              |              |          |
|------------|----|----------|---------------------------|-----------------|--------------|--------------|----------|
| cg22623062 | 11 | 44972293 | GeneBody/5'UTR/1st exon   | <i>TP5311</i>   | -4.587±0.46  | -4.895±0.496 | 2.59E-03 |
| cg01618083 | 11 | 45868993 | GeneBody/1st exon         | <i>CRY2</i>     | -5.166±0.347 | -5.475±0.52  | 3.68E-04 |
| cg24691578 | 11 | 45869488 | GeneBody/1st intron       | <i>CRY2</i>     | -4.749±0.306 | -5.084±0.437 | 1.61E-05 |
| cg16280313 | 11 | 45939543 | GeneBody/5'UTR/1st exon   | <i>PEX16</i>    | -4.491±0.34  | -4.754±0.46  | 1.18E-03 |
| cg06622725 | 11 | 45939917 | TSS1500                   | <i>PEX16</i>    | -6.277±0.554 | -6.929±0.615 | 1.93E-06 |
| cg10403260 | 11 | 46142963 | GeneBody/5'UTR/1st exon   | <i>PHF21A</i>   | -5.437±0.694 | -5.904±0.657 | 1.96E-03 |
| cg24407308 | 11 | 46354997 | GeneBody/1st exon         | <i>DGKZ</i>     | -3.943±0.36  | -4.181±0.356 | 2.47E-03 |
| cg18925548 | 11 | 46402535 | TSS200                    | <i>MDK</i>      | -4.601±0.279 | -4.862±0.429 | 2.18E-04 |
| cg00078194 | 11 | 46402949 | TSS1500                   | <i>MDK</i>      | -5.095±0.551 | -5.55±0.571  | 2.69E-04 |
| cg01991150 | 11 | 46407677 | GeneBody/1st exon         | <i>CHRM4</i>    | 2.997±0.208  | 3.114±0.215  | 9.95E-03 |
| cg07022885 | 11 | 46638638 | GeneBody/5'UTR/1st intron | <i>HARBI1</i>   | -5.116±0.361 | -5.373±0.355 | 1.20E-03 |
| cg05433460 | 11 | 46720913 | GeneBody/5'UTR/1st intron | <i>ARHGAP1</i>  | 2.349±0.288  | 2.519±0.359  | 9.97E-03 |
| cg15384392 | 11 | 46721921 | GeneBody/5'UTR/1st intron | <i>ARHGAP1</i>  | -4.963±0.406 | -5.238±0.38  | 1.83E-03 |
| cg14585160 | 11 | 46722671 | GeneBody/1st exon         | <i>ZNF408</i>   | -5.219±0.412 | -5.509±0.426 | 1.49E-03 |
| cg20199333 | 11 | 46740790 | GeneBody/1st exon         | <i>F2</i>       | 2.555±0.177  | 2.695±0.2    | 5.29E-04 |
| cg17891278 | 11 | 47198315 | GeneBody/1st intron       | <i>ARFGAP2</i>  | -5.242±0.604 | -5.623±0.559 | 3.43E-03 |
| cg04444006 | 11 | 47198757 | TSS200                    | <i>ARFGAP2</i>  | -4.053±0.512 | -4.409±0.423 | 1.17E-03 |
| cg24099544 | 11 | 47291115 | TSS200                    | <i>MADD</i>     | -6.176±0.635 | -6.647±0.596 | 7.38E-04 |
| cg10264187 | 11 | 47429713 | TSS1500                   | <i>SLC39A13</i> | -4.982±0.586 | -5.607±0.601 | 7.83E-06 |
| cg09163021 | 11 | 47470768 | TSS200                    | <i>RAPSN</i>    | 0.698±0.157  | 0.873±0.194  | 6.57E-06 |
| cg24576270 | 11 | 47574547 | GeneBody/5'UTR/1st exon   | <i>CELF1</i>    | -5.004±0.469 | -5.307±0.433 | 2.73E-03 |
| cg25059436 | 11 | 47574990 | TSS200                    | <i>CELF1</i>    | -4.433±0.258 | -4.696±0.531 | 4.06E-04 |
| cg21681756 | 11 | 47600081 | GeneBody/5'UTR/1st intron | <i>KBTBD4</i>   | -4.75±0.38   | -5.2±0.533   | 4.25E-06 |
| cg17839278 | 11 | 47664375 | TSS200                    | <i>MTCH2</i>    | -3.754±0.301 | -3.952±0.416 | 5.42E-03 |
| cg02772367 | 11 | 47870447 | TSS1500                   | <i>NUP160</i>   | -4.451±0.456 | -4.841±0.533 | 2.41E-04 |
| cg06780358 | 11 | 48003065 | GeneBody/1st intron       | <i>PTPRJ</i>    | -4.695±0.489 | -4.992±0.533 | 6.15E-03 |
| cg04962134 | 11 | 55653310 | GeneBody                  | <i>TRIM51</i>   | 1.479±0.216  | 1.337±0.225  | 2.80E-03 |
| cg22636253 | 11 | 57102965 | GeneBody/5'UTR/1st intron | <i>SSRP1</i>    | -5.649±0.533 | -6.056±0.497 | 5.41E-04 |
| cg24329717 | 11 | 57106093 | GeneBody/1st exon         | <i>P2RX3</i>    | 3.45±0.254   | 3.666±0.34   | 4.21E-04 |
| cg07764959 | 11 | 57282648 | TSS1500                   | <i>SLC43A1</i>  | -4.564±0.522 | -5.107±0.585 | 1.43E-05 |
| cg26624118 | 11 | 57283450 | TSS1500                   | <i>SLC43A1</i>  | -4.313±0.331 | -4.529±0.353 | 3.31E-03 |
| cg23185657 | 11 | 57298081 | GeneBody/5'UTR/1st intron | <i>TIMM10</i>   | -4.276±0.574 | -4.627±0.622 | 5.80E-03 |
| cg05677402 | 11 | 57335051 | GeneBody/1st intron       | <i>UBE2L6</i>   | -6.157±0.55  | -6.642±0.548 | 1.09E-04 |
| cg23491309 | 11 | 57335585 | GeneBody/5'UTR/1st exon   | <i>UBE2L6</i>   | -5.332±0.573 | -5.716±0.58  | 2.31E-03 |
| cg01959848 | 11 | 57480394 | GeneBody/1st intron       | <i>TMX2</i>     | -4.914±0.533 | -5.487±0.625 | 9.80E-06 |
| cg23641267 | 11 | 58343791 | TSS1500                   | <i>LPXN</i>     | 1.357±0.251  | 1.611±0.297  | 2.63E-05 |
| cg13864937 | 11 | 58874733 | GeneBody/5'UTR/1st exon   | <i>FAM111B</i>  | -4.535±0.276 | -4.837±0.418 | 2.15E-05 |
| cg24238205 | 11 | 58912174 | TSS200                    | <i>FAM111A</i>  | -4.265±0.28  | -4.552±0.397 | 4.23E-05 |
| cg12738007 | 11 | 59578167 | GeneBody/5'UTR/1st exon   | <i>MRPL16</i>   | -6.262±0.49  | -6.706±0.513 | 8.43E-05 |
| cg18343292 | 11 | 60146078 | GeneBody/5'UTR/1st exon   | <i>MS4A7</i>    | -1.25±0.252  | -1.399±0.272 | 7.38E-03 |
| cg06066303 | 11 | 60197138 | GeneBody/5'UTR/1st exon   | <i>MS4A5</i>    | 2.265±0.285  | 2.443±0.273  | 3.82E-03 |
| cg04754011 | 11 | 60623144 | GeneBody/5'UTR/1st intron | <i>PTGDR2</i>   | -1.696±0.258 | -1.867±0.303 | 3.58E-03 |
| cg02965078 | 11 | 60623504 | TSS200                    | <i>PTGDR2</i>   | -2.22±0.18   | -2.333±0.237 | 7.14E-03 |
| cg00778920 | 11 | 60674370 | TSS1500                   | <i>PRPF19</i>   | -4.586±0.492 | -4.859±0.451 | 9.37E-03 |
| cg03555909 | 11 | 60682030 | GeneBody/5'UTR/1st intron | <i>TMEM109</i>  | -6.251±0.49  | -6.61±0.495  | 9.63E-04 |
| cg07962043 | 11 | 60691582 | TSS1500                   | <i>TMEM132A</i> | -3.457±0.342 | -3.799±0.409 | 3.09E-05 |
| cg16418684 | 11 | 61062205 | GeneBody/1st intron       | <i>VWCE</i>     | -4.112±0.353 | -4.535±0.402 | 1.57E-06 |
| cg21043754 | 11 | 61100532 | TSS200                    | <i>DAK</i>      | -5.733±0.587 | -6.182±0.612 | 5.59E-04 |
| cg03160637 | 11 | 61101089 | TSS1500                   | <i>DDB1</i>     | -4.022±0.447 | -4.513±0.457 | 4.66E-06 |
| cg03483654 | 11 | 61102074 | TSS1500                   | <i>DDB1</i>     | 5.132±0.335  | 5.524±0.418  | 3.07E-06 |
| cg07273415 | 11 | 61130067 | TSS1500                   | <i>CYB561A3</i> | -4.663±0.378 | -4.947±0.285 | 4.78E-04 |
| cg03293770 | 11 | 61197075 | GeneBody/1st intron       | <i>CPSF7</i>    | -4.792±0.582 | -5.119±0.564 | 9.25E-03 |
| cg13744070 | 11 | 61197882 | GeneBody/1st intron       | <i>SDHAF2</i>   | -4.554±0.468 | -4.972±0.545 | 1.39E-04 |
| cg18432384 | 11 | 61248084 | TSS1500                   | <i>PPP1R32</i>  | 2.482±0.199  | 2.653±0.281  | 4.34E-04 |
| cg14572111 | 11 | 61348901 | TSS1500                   | <i>SYT7</i>     | -4.357±0.343 | -4.668±0.41  | 1.18E-04 |
| cg14086033 | 11 | 61559821 | GeneBody/1st intron       | <i>TMEM258</i>  | -4.408±0.466 | -4.728±0.437 | 1.58E-03 |
| cg01447420 | 11 | 61559923 | GeneBody/1st intron       | <i>TMEM258</i>  | -4.783±0.527 | -5.213±0.551 | 3.21E-04 |
| cg22704775 | 11 | 61560126 | GeneBody/5'UTR/1st exon   | <i>FEN1</i>     | -4.878±0.492 | -5.163±0.4   | 5.86E-03 |
| cg11730100 | 11 | 61560294 | GeneBody/5'UTR/1st exon   | <i>FEN1</i>     | -3.094±0.411 | -2.684±0.543 | 4.77E-05 |
| cg27173322 | 11 | 61584112 | GeneBody/1st exon         | <i>FADS1</i>    | -5.18±0.417  | -5.534±0.616 | 5.90E-04 |
| cg18495298 | 11 | 61658590 | GeneBody/1st intron       | <i>FADS3</i>    | -3.794±0.195 | -4.016±0.338 | 2.67E-05 |
| cg20691408 | 11 | 61659465 | TSS1500                   | <i>FADS3</i>    | -3.13±0.315  | -3.343±0.406 | 3.71E-03 |
| cg15589156 | 11 | 61684592 | GeneBody/1st intron       | <i>RAB31L1</i>  | -4.329±0.374 | -4.852±0.676 | 1.11E-06 |
| cg26041297 | 11 | 62009811 | GeneBody/1st exon         | <i>SCGB1D2</i>  | -0.273±0.169 | -0.461±0.25  | 1.45E-05 |
| cg09494188 | 11 | 62186529 | GeneBody/5'UTR/1st exon   | <i>SCGB1A1</i>  | 2.273±0.287  | 2.476±0.331  | 1.79E-03 |
| cg19570317 | 11 | 62368881 | GeneBody/1st intron       | <i>MTA2</i>     | -5.356±0.459 | -5.948±0.614 | 8.10E-07 |
| cg09086761 | 11 | 62369541 | TSS1500                   | <i>MTA2</i>     | -5.555±0.567 | -6.036±0.6   | 2.01E-04 |
| cg07533529 | 11 | 62379499 | TSS1500                   | <i>ROM1</i>     | -3.324±0.229 | -3.469±0.193 | 2.94E-03 |
| cg01858173 | 11 | 62380679 | TSS1500                   | <i>EML3</i>     | -4.074±0.268 | -4.305±0.473 | 1.15E-03 |
| cg13352306 | 11 | 62381264 | TSS1500                   | <i>EML3</i>     | 2.834±0.174  | 2.683±0.277  | 6.24E-04 |
| cg11706746 | 11 | 62389756 | TSS200                    | <i>B3GAT3</i>   | -5.327±0.356 | -5.763±0.463 | 1.77E-06 |
| cg21161651 | 11 | 62439250 | TSS200                    | <i>C11orf48</i> | -5.342±0.39  | -5.576±0.392 | 5.73E-03 |
| cg23202409 | 11 | 62439262 | TSS200                    | <i>C11orf48</i> | -5.522±0.519 | -5.914±0.472 | 5.86E-04 |
| cg17240496 | 11 | 62446340 | GeneBody/1st exon         | <i>UBXN1</i>    | -5.542±0.479 | -5.913±0.481 | 5.26E-04 |
| cg22091798 | 11 | 62446605 | TSS200                    | <i>UBXN1</i>    | -4.776±0.31  | -5.125±0.454 | 1.16E-05 |
| cg07237830 | 11 | 62474725 | TSS1500                   | <i>GNG3</i>     | 0.811±0.168  | 0.947±0.235  | 8.82E-04 |
| cg05059825 | 11 | 62495950 | TSS200                    | <i>TTC9C</i>    | -4.447±0.404 | -4.745±0.551 | 1.97E-03 |
| cg24515202 | 11 | 62495977 | GeneBody/5'UTR/1st exon   | <i>TTC9C</i>    | -4.184±0.429 | -4.513±0.596 | 1.42E-03 |
| cg02600515 | 11 | 62521696 | TSS200                    | <i>ZBTB3</i>    | -4.103±0.469 | -4.543±0.432 | 4.00E-05 |
| cg21850239 | 11 | 62528988 | TSS200                    | <i>POLR2G</i>   | -5.116±0.469 | -5.385±0.466 | 8.31E-03 |
| cg26125443 | 11 | 62529213 | GeneBody/1st intron       | <i>POLR2G</i>   | -4.76±0.367  | -5.044±0.485 | 1.11E-03 |
| cg06840239 | 11 | 62539043 | GeneBody/5'UTR/1st intron | <i>TAF6L</i>    | -4.926±0.357 | -5.176±0.328 | 1.31E-03 |
| cg18394496 | 11 | 62554881 | GeneBody/5'UTR/1st exon   | <i>TMEM179B</i> | -6.168±0.694 | -6.76±0.651  | 1.46E-04 |
| cg21759080 | 11 | 62599762 | TSS200                    | <i>STX5</i>     | -5.327±0.614 | -5.746±0.541 | 1.56E-03 |
| cg00754253 | 11 | 63259187 | TSS1500                   | <i>HRASLS5</i>  | -0.805±0.276 | -0.652±0.257 | 9.63E-03 |
| cg25599242 | 11 | 63304337 | GeneBody/5'UTR/1st exon   | <i>RARRES3</i>  | -3.414±0.218 | -3.669±0.349 | 1.08E-05 |
| cg08242020 | 11 | 63448782 | TSS200                    | <i>RTN3</i>     | -4.75±0.515  | -5.154±0.543 | 5.03E-04 |
| cg13245912 | 11 | 63449340 | GeneBody/1st intron       | <i>RTN3</i>     | -5.196±0.433 | -5.558±0.601 | 5.47E-04 |
| cg13802364 | 11 | 63684106 | GeneBody/5'UTR/1st exon   | <i>RCOR2</i>    | -5.248±0.42  | -5.553±0.451 | 1.19E-03 |
| cg23957915 | 11 | 63684911 | TSS1500                   | <i>RCOR2</i>    | -5.062±0.478 | -5.655±0.692 | 2.29E-06 |
| cg12785087 | 11 | 63705946 | TSS1500                   | <i>NAA40</i>    | -4.941±0.37  | -5.218±0.49  | 1.50E-03 |
| cg19357918 | 11 | 63953256 | TSS1500                   | <i>STIP1</i>    | -4.463±0.336 | -4.682±0.325 | 2.78E-03 |
| cg06632528 | 11 | 63993432 | TSS200                    | <i>TRPT1</i>    | -5.084±0.453 | -5.504±0.385 | 4.14E-05 |
| cg15768270 | 11 | 63993915 | GeneBody/5'UTR/1st intron | <i>NUDT22</i>   | -4.653±0.421 | -4.909±0.57  | 9.71E-03 |
| cg16977872 | 11 | 64008132 | TSS1500                   | <i>FKBP2</i>    | -4.688±0.336 | -4.98±0.461  | 3.39E-04 |

|            |    |           |                           |                   |              |              |          |
|------------|----|-----------|---------------------------|-------------------|--------------|--------------|----------|
| cg13620770 | 11 | 64051738  | TSS200                    | <i>GPR137</i>     | -2.253±0.224 | -1.884±0.299 | 8.17E-09 |
| cg07588779 | 11 | 64051753  | TSS200                    | <i>GPR137</i>     | -2.705±0.272 | -2.49±0.374  | 9.65E-04 |
| cg03764506 | 11 | 64072089  | TSS1500                   | <i>ESRRA</i>      | -4.95±0.424  | -5.209±0.368 | 4.22E-03 |
| cg23073111 | 11 | 64073390  | GeneBody/5'UTR/1st intron | <i>ESRRA</i>      | -1.124±0.221 | -1.267±0.268 | 4.64E-03 |
| cg11296937 | 11 | 64084966  | GeneBody/1st exon         | <i>TRMT112</i>    | -2.009±0.3   | -1.783±0.32  | 8.15E-04 |
| cg17589175 | 11 | 64085337  | TSS1500                   | <i>PRDX5</i>      | -4.933±0.504 | -5.336±0.507 | 3.62E-04 |
| cg24580001 | 11 | 64106532  | TSS1500                   | <i>CCDC88B</i>    | 2.129±0.178  | 2.309±0.25   | 4.86E-05 |
| cg24970539 | 11 | 64126392  | TSS1500                   | <i>RPS6KA4</i>    | -3.477±0.242 | -3.661±0.337 | 1.62E-03 |
| cg22833292 | 11 | 64126806  | GeneBody/1st intron       | <i>RPS6KA4</i>    | -3.817±0.236 | -4.069±0.412 | 6.90E-05 |
| cg25836271 | 11 | 64512829  | GeneBody/5'UTR/1st exon   | <i>RASGRP2</i>    | -3.871±0.4   | -4.143±0.537 | 4.02E-03 |
| cg26884581 | 11 | 64527414  | GeneBody/5'UTR/1st exon   | <i>PYGM</i>       | -0.907±0.271 | -1.073±0.319 | 6.64E-03 |
| cg11295902 | 11 | 64546368  | TSS200                    | <i>SF1</i>        | -4.786±0.609 | -5.369±0.687 | 5.00E-05 |
| cg10821722 | 11 | 64571899  | TSS1500                   | <i>MAP4K2</i>     | 3.394±0.224  | 3.652±0.329  | 8.45E-06 |
| cg16668394 | 11 | 64578521  | GeneBody/5'UTR/1st exon   | <i>MEN1</i>       | -3.781±0.366 | -4.106±0.5   | 2.61E-04 |
| cg23473849 | 11 | 64692066  | TSS200                    | <i>PPP2R5B</i>    | -4.557±0.268 | -4.755±0.263 | 8.49E-04 |
| cg04480914 | 11 | 64692198  | GeneBody/5'UTR/1st exon   | <i>PPP2R5B</i>    | -6.205±0.716 | -6.697±0.651 | 1.52E-03 |
| cg17022914 | 11 | 64764564  | TSS200                    | <i>BATF2</i>      | -4.196±0.317 | -4.489±0.4   | 1.13E-04 |
| cg19017420 | 11 | 64781299  | TSS1500                   | <i>ARL2-SNX15</i> | -3.993±0.53  | -4.306±0.518 | 6.28E-03 |
| cg15225105 | 11 | 64808343  | TSS200                    | <i>SAC3D1</i>     | -4.335±0.382 | -4.789±0.511 | 3.16E-06 |
| cg02646854 | 11 | 64863958  | GeneBody/1st intron       | <i>VPS51</i>      | -4.375±0.41  | -4.828±0.39  | 3.78E-06 |
| cg14430111 | 11 | 64879374  | GeneBody/1st exon         | <i>TM7SF2</i>     | -5.244±0.598 | -5.832±0.591 | 2.38E-05 |
| cg16209630 | 11 | 64885070  | GeneBody/1st exon         | <i>ZNHIT2</i>     | -5.741±0.547 | -6.219±0.516 | 1.10E-04 |
| cg03591238 | 11 | 64885558  | TSS1500                   | <i>ZNHIT2</i>     | -2.193±0.221 | -2.343±0.228 | 2.09E-03 |
| cg02441831 | 11 | 64901569  | GeneBody/5'UTR/1st intron | <i>SYVN1</i>      | -4.507±0.511 | -4.929±0.593 | 3.56E-04 |
| cg26868799 | 11 | 64902564  | TSS1500                   | <i>SYVN1</i>      | -5.102±0.326 | -5.298±0.304 | 5.12E-03 |
| cg05072951 | 11 | 64949398  | GeneBody/1st exon         | <i>CAPN1</i>      | -5.002±0.418 | -5.258±0.452 | 5.73E-03 |
| cg17346115 | 11 | 65029103  | TSS1500                   | <i>POLA2</i>      | -5.691±0.533 | -6.14±0.589  | 2.47E-04 |
| cg04780126 | 11 | 65029484  | GeneBody/5'UTR/1st exon   | <i>POLA2</i>      | -4.442±0.369 | -4.8±0.512   | 8.21E-05 |
| cg01630869 | 11 | 65082120  | TSS200                    | <i>CDC42EP2</i>   | -5.002±0.389 | -5.232±0.436 | 8.09E-03 |
| cg02186298 | 11 | 65101602  | GeneBody/1st intron       | <i>DPF2</i>       | -2.803±0.222 | -2.937±0.274 | 8.55E-03 |
| cg26977045 | 11 | 65121844  | TSS1500                   | <i>TIGD3</i>      | -3.56±0.494  | -3.845±0.481 | 7.66E-03 |
| cg02344238 | 11 | 65153777  | TSS1500                   | <i>FRMD8</i>      | -4.372±0.309 | -4.722±0.383 | 5.25E-06 |
| cg12206093 | 11 | 65154388  | GeneBody/5'UTR/1st intron | <i>FRMD8</i>      | -5.639±0.471 | -6.107±0.597 | 4.31E-05 |
| cg22417398 | 11 | 65293094  | GeneBody                  | <i>SCYL1</i>      | -3.489±0.212 | -3.676±0.261 | 1.82E-04 |
| cg22552669 | 11 | 65338422  | GeneBody                  | <i>SSSCA1</i>     | -4.624±0.402 | -4.963±0.57  | 5.35E-04 |
| cg13179915 | 11 | 65362949  | GeneBody/1st exon         | <i>KCNK7</i>      | 2.427±0.187  | 2.586±0.266  | 4.93E-04 |
| cg15854296 | 11 | 65382529  | TSS1500                   | <i>MAP3K11</i>    | -4.091±0.428 | -4.339±0.475 | 8.89E-03 |
| cg25361844 | 11 | 65405362  | TSS1500                   | <i>SIPA1</i>      | -4.682±0.594 | -5.095±0.503 | 1.23E-03 |
| cg26668713 | 11 | 65405903  | GeneBody/5'UTR/1st intron | <i>SIPA1</i>      | -4.432±0.433 | -4.716±0.52  | 4.00E-03 |
| cg04172043 | 11 | 65430868  | TSS1500                   | <i>RELA</i>       | -5.116±0.335 | -5.519±0.523 | 5.70E-06 |
| cg22048492 | 11 | 65479309  | TSS200                    | <i>KAT5</i>       | -4.601±0.43  | -4.93±0.48   | 7.83E-04 |
| cg18896539 | 11 | 65479495  | GeneBody/5'UTR/1st exon   | <i>KAT5</i>       | -4.889±0.322 | -5.203±0.536 | 1.93E-04 |
| cg19379303 | 11 | 65488190  | GeneBody/1st exon         | <i>RNASEH2C</i>   | -5.992±0.573 | -6.465±0.603 | 2.82E-04 |
| cg20315951 | 11 | 65554398  | TSS200                    | <i>OVOL1</i>      | -4.184±0.412 | -4.577±0.591 | 1.24E-04 |
| cg02715140 | 11 | 65625717  | GeneBody/5'UTR/1st exon   | <i>CFL1</i>       | -5.298±0.489 | -5.8±0.453   | 1.10E-05 |
| cg04946535 | 11 | 65627070  | TSS1500                   | <i>MUS81</i>      | -5.127±0.294 | -5.321±0.278 | 2.33E-03 |
| cg15883761 | 11 | 65627811  | TSS200                    | <i>MUS81</i>      | -4.903±0.514 | -5.383±0.509 | 4.96E-05 |
| cg04042106 | 11 | 65628736  | GeneBody                  | <i>MUS81</i>      | -4.34±0.292  | -4.546±0.479 | 5.60E-03 |
| cg04949741 | 11 | 65640486  | TSS200                    | <i>EFEMP2</i>     | -2.712±0.42  | -2.967±0.545 | 8.92E-03 |
| cg05339305 | 11 | 65657822  | TSS200                    | <i>CCDC85B</i>    | -4.682±0.276 | -5.089±0.512 | 5.45E-07 |
| cg10172318 | 11 | 65686003  | GeneBody/1st intron       | <i>C11orf68</i>   | -4.156±0.469 | -4.699±0.625 | 4.72E-06 |
| cg13547237 | 11 | 65687877  | GeneBody                  | <i>DRAP1</i>      | -1.482±0.187 | -1.623±0.276 | 2.13E-03 |
| cg06285486 | 11 | 65729635  | GeneBody/1st intron       | <i>SART1</i>      | -3.624±0.18  | -3.494±0.221 | 1.76E-03 |
| cg09462587 | 11 | 65769444  | TSS200                    | <i>BANF1</i>      | -4.403±0.387 | -4.68±0.548  | 2.92E-03 |
| cg04197135 | 11 | 65769867  | TSS1500                   | <i>EIF1AD</i>     | -4.997±0.392 | -5.242±0.356 | 3.70E-03 |
| cg16196602 | 11 | 65819332  | TSS1500                   | <i>SF3B2</i>      | -3.18±0.215  | -3.339±0.217 | 8.73E-04 |
| cg01663295 | 11 | 65837194  | TSS1500                   | <i>PACS1</i>      | -3.142±0.207 | -3.423±0.323 | 7.17E-07 |
| cg25034557 | 11 | 65838645  | GeneBody/1st intron       | <i>PACS1</i>      | -4.267±0.636 | -4.669±0.558 | 3.03E-03 |
| cg20808145 | 11 | 66025705  | GeneBody/5'UTR/1st intron | <i>KLC2</i>       | -4.657±0.456 | -5.009±0.473 | 5.83E-04 |
| cg19026260 | 11 | 66045351  | TSS1500                   | <i>CNIH2</i>      | -3.571±0.315 | -3.761±0.31  | 5.49E-03 |
| cg07872652 | 11 | 66045932  | GeneBody/1st exon         | <i>CNIH2</i>      | -3.577±0.286 | -3.921±0.588 | 4.05E-05 |
| cg11400333 | 11 | 66059695  | GeneBody/1st intron       | <i>TMEM151A</i>   | -4.315±0.28  | -4.501±0.318 | 3.05E-03 |
| cg05998426 | 11 | 66103925  | GeneBody/5'UTR/1st exon   | <i>RIN1</i>       | -4.463±0.413 | -4.774±0.55  | 1.49E-03 |
| cg24532669 | 11 | 66112147  | GeneBody/5'UTR/1st intron | <i>BRMS1</i>      | -4.728±0.445 | -5.048±0.363 | 8.33E-04 |
| cg10839997 | 11 | 66115647  | TSS1500                   | <i>B3GNT1</i>     | -4.631±0.538 | -4.97±0.589  | 4.59E-03 |
| cg13313036 | 11 | 66139196  | GeneBody/5'UTR/1st exon   | <i>SLC29A2</i>    | -6.151±0.466 | -6.482±0.509 | 1.57E-03 |
| cg10331048 | 11 | 66205894  | GeneBody/1st intron       | <i>MRPL11</i>     | -4.011±0.281 | -4.197±0.449 | 8.33E-03 |
| cg24394865 | 11 | 66206319  | TSS200                    | <i>MRPL11</i>     | -4.17±0.313  | -4.454±0.388 | 1.36E-04 |
| cg27388792 | 11 | 66247347  | TSS200                    | <i>DPP3</i>       | -5.343±0.529 | -5.767±0.495 | 3.21E-04 |
| cg27441551 | 11 | 66247971  | GeneBody/5'UTR/1st intron | <i>DPP3</i>       | -5.191±0.372 | -5.595±0.593 | 3.25E-05 |
| cg03851112 | 11 | 66278358  | GeneBody/1st intron       | <i>BBS1</i>       | -3.862±0.277 | -4.046±0.36  | 4.34E-03 |
| cg08420085 | 11 | 66313549  | GeneBody/5'UTR/1st exon   | <i>ZDHHC24</i>    | -4.422±0.326 | -4.751±0.637 | 3.24E-04 |
| cg10523820 | 11 | 66314211  | TSS200                    | <i>ACTN3</i>      | -4.629±0.369 | -4.998±0.484 | 4.35E-05 |
| cg04663194 | 11 | 66315239  | GeneBody/1st intron       | <i>ACTN3</i>      | 1.758±0.22   | 1.925±0.281  | 1.21E-03 |
| cg05087948 | 11 | 66336197  | TSS200                    | <i>CTSF</i>       | -4.008±0.603 | -4.363±0.567 | 6.12E-03 |
| cg27278802 | 11 | 66359430  | GeneBody/1st exon         | <i>CCDC87</i>     | 2.551±0.233  | 2.789±0.338  | 4.89E-05 |
| cg13074965 | 11 | 66395305  | GeneBody/1st intron       | <i>RBM14-RBM4</i> | 2.978±0.175  | 3.082±0.201  | 8.47E-03 |
| cg03429582 | 11 | 66406312  | GeneBody/5'UTR/1st intron | <i>RBM4</i>       | -5.294±0.523 | -5.781±0.492 | 4.71E-05 |
| cg18962105 | 11 | 66444806  | GeneBody/5'UTR/1st intron | <i>RBM4B</i>      | -4.491±0.45  | -4.787±0.394 | 2.19E-03 |
| cg23347400 | 11 | 66445460  | TSS200                    | <i>RBM4B</i>      | -5.493±0.511 | -5.774±0.413 | 8.56E-03 |
| cg20052411 | 11 | 66611241  | GeneBody                  | <i>RCE1</i>       | -5.922±0.563 | -6.269±0.422 | 3.15E-03 |
| cg20358834 | 11 | 66624256  | TSS1500                   | <i>LRFN4</i>      | -5.431±0.376 | -5.73±0.447  | 5.83E-04 |
| cg12724357 | 11 | 66790285  | GeneBody/5'UTR/1st exon   | <i>SYT12</i>      | -2.941±0.331 | -3.139±0.42  | 9.56E-03 |
| cg02066887 | 11 | 67120405  | GeneBody                  | <i>POLD4</i>      | -4.94±0.472  | -5.352±0.545 | 1.78E-04 |
| cg09706243 | 11 | 67121634  | TSS1500                   | <i>POLD4</i>      | -2.509±0.285 | -2.707±0.378 | 3.02E-03 |
| cg01787047 | 11 | 67159079  | TSS1500                   | <i>RAD9A</i>      | -5.177±0.47  | -5.596±0.54  | 1.34E-04 |
| cg13055001 | 11 | 67169813  | TSS1500                   | <i>PPP1CA</i>     | -2.999±0.309 | -3.31±0.403  | 3.98E-05 |
| cg09190408 | 11 | 67170610  | TSS1500                   | <i>TBC1D10C</i>   | 1.963±0.277  | 1.78±0.325   | 3.46E-03 |
| cg24570987 | 11 | 67195973  | GeneBody/5'UTR/1st exon   | <i>RPS6KB2</i>    | -6.181±0.53  | -6.696±0.506 | 2.63E-05 |
| cg09541468 | 11 | 67211245  | GeneBody/5'UTR/1st exon   | <i>CORO1B</i>     | -5.607±0.522 | -6.151±0.544 | 1.12E-05 |
| cg15810744 | 11 | 672211300 | TSS200                    | <i>CORO1B</i>     | -4.636±0.257 | -4.91±0.294  | 1.05E-05 |
| cg20483763 | 11 | 67223174  | GeneBody/1st exon         | <i>CABP4</i>      | 4.962±0.293  | 5.175±0.39   | 2.11E-03 |
| cg15039399 | 11 | 67275985  | GeneBody/5'UTR/1st exon   | <i>CDK2AP2</i>    | -5.844±0.586 | -6.504±0.639 | 3.79E-06 |
| cg02659086 | 11 | 67350976  | TSS200                    | <i>GSTP1</i>      | -4.701±0.43  | -5.002±0.438 | 1.56E-03 |
| cg06235429 | 11 | 67373114  | TSS1500                   | <i>NDUVF1</i>     | 1.839±0.219  | 1.956±0.166  | 9.91E-03 |

|             |    |           |                           |              |              |              |          |
|-------------|----|-----------|---------------------------|--------------|--------------|--------------|----------|
| cg19038228  | 11 | 67373977  | TSS1500                   | NDUVF1       | -4.502±0.324 | -4.937±0.505 | 8.33E-07 |
| cg16625125  | 11 | 67397578  | TSS200                    | NUDT8        | -4.81±0.514  | -5.304±0.592 | 4.88E-05 |
| cg08139833  | 11 | 67798212  | GeneBody/5'UTR/1st intron | NDUFS8       | -5.266±0.423 | -5.766±0.611 | 5.13E-06 |
| cg24030630  | 11 | 67806668  | GeneBody/5'UTR/1st intron | TCIRG1       | -5.459±0.568 | -5.863±0.547 | 1.20E-03 |
| cg27090024  | 11 | 67889237  | TSS1500                   | CHKA         | -2.767±0.237 | -2.567±0.457 | 2.16E-03 |
| cg27655905  | 11 | 68038788  | GeneBody/5'UTR/1st intron | C11orf24     | -3.978±0.337 | -4.247±0.336 | 3.79E-04 |
| cg10276576  | 11 | 68039926  | TSS1500                   | C11orf24     | -5.391±0.492 | -5.748±0.447 | 8.79E-04 |
| cg21572997  | 11 | 68080756  | GeneBody/1st intron       | LRP5         | -5.266±0.646 | -5.709±0.569 | 1.48E-03 |
| cg05650764  | 11 | 68227812  | TSS1500                   | PPP6R3       | -4.695±0.339 | -4.988±0.463 | 3.54E-04 |
| cg17404081  | 11 | 68228768  | GeneBody/5'UTR/1st intron | PPP6R3       | -4.921±0.324 | -5.161±0.312 | 7.83E-04 |
| cg16721845  | 11 | 68518800  | GeneBody/5'UTR/1st intron | MTL5         | -4.637±0.456 | -4.915±0.542 | 7.07E-03 |
| cg10413342  | 11 | 68671697  | GeneBody/1st intron       | IGHMBP2      | -5.034±0.364 | -5.374±0.436 | 8.18E-05 |
| cg10490196  | 11 | 68816451  | GeneBody/5'UTR/1st exon   | TPCN2        | -5.762±0.455 | -6.078±0.42  | 1.43E-03 |
| cg08170622  | 11 | 69455877  | GeneBody/5'UTR/1st exon   | CCND1        | -4.244±0.388 | -4.619±0.472 | 5.25E-05 |
| cg25060573  | 11 | 69457121  | GeneBody/1st intron       | CCND1        | -4.86±0.34   | -5.09±0.302  | 1.73E-03 |
| cg05200606  | 11 | 69457819  | GeneBody                  | CCND1        | -3.896±0.284 | -4.087±0.357 | 3.67E-03 |
| cg04717045  | 11 | 69468789  | GeneBody/3'UTR            | CCND1        | 2.039±0.186  | 2.234±0.309  | 7.42E-05 |
| cg02723533  | 11 | 69468991  | GeneBody/3'UTR            | CCND1        | 5.251±0.392  | 5.561±0.431  | 5.12E-04 |
| cg11802013  | 11 | 69469175  | GeneBody/3'UTR            | CCND1        | 1.942±0.273  | 2.136±0.323  | 1.86E-03 |
| cg26123414  | 11 | 69490316  | TSS200                    | ORAOV1       | -4.96±0.345  | -5.217±0.353 | 8.44E-04 |
| cg17277529  | 11 | 69633959  | GeneBody/5'UTR/1st exon   | FGF3         | -4.1±0.371   | -4.377±0.454 | 1.25E-05 |
| cg20821095  | 11 | 70049116  | TSS200                    | FADD         | -4.72±0.597  | -5.283±0.51  | 3.35E-05 |
| cg06384026  | 11 | 70117429  | GeneBody/1st intron       | PPFIA1       | -5.237±0.406 | -5.626±0.437 | 4.30E-05 |
| cg18187335  | 11 | 70244230  | TSS1500                   | CTTN         | -3.72±0.322  | -4.027±0.322 | 3.89E-05 |
| cg10889792  | 11 | 71258917  | TSS1500                   | KRTAP5-9     | 1.851±0.237  | 2.006±0.296  | 4.53E-03 |
| cg26832211  | 11 | 71259251  | TSS1500                   | KRTAP5-9     | 1.793±0.254  | 1.958±0.304  | 4.20E-03 |
| cg01490505  | 11 | 71499006  | GeneBody/1st intron       | FAM86C1      | -3.371±0.173 | -3.508±0.215 | 6.77E-04 |
| cg26039806  | 11 | 71639257  | GeneBody/1st intron       | LOC100133315 | -4.893±0.46  | -5.192±0.491 | 3.31E-03 |
| cg16749930  | 11 | 71709978  | GeneBody/5'UTR/1st exon   | IL18BP       | -1.021±0.232 | -1.223±0.278 | 2.15E-04 |
| cg08440425  | 11 | 71790735  | TSS1500                   | LRTOMT       | -2.493±0.296 | -2.676±0.373 | 7.30E-03 |
| cg17058777  | 11 | 71814579  | TSS200                    | LAMTOR1      | -4.348±0.337 | -4.628±0.439 | 4.75E-04 |
| cg20411654  | 11 | 72145355  | GeneBody/5'UTR/1st exon   | CLPB         | -5.258±0.461 | -5.719±0.465 | 1.98E-05 |
| cg22635155  | 11 | 72385075  | GeneBody/1st intron       | PDE2A        | -3.776±0.293 | -4.022±0.396 | 4.87E-04 |
| cg171114257 | 11 | 72854156  | TSS1500                   | FCHSD2       | -5.341±0.571 | -5.84±0.582  | 8.56E-07 |
| cg22051865  | 11 | 73019002  | TSS1500                   | ARHGEF17     | -5.577±0.53  | -6.038±0.56  | 1.49E-04 |
| cg19800926  | 11 | 73087939  | GeneBody/5'UTR/1st intron | RELT         | -5.422±0.58  | -5.837±0.561 | 1.15E-03 |
| cg22108265  | 11 | 73471972  | GeneBody/5'UTR/1st exon   | RAB6A        | -4.188±0.349 | -4.503±0.437 | 1.52E-04 |
| cg07196761  | 11 | 73586776  | TSS1500                   | PAAF1        | 2.593±0.191  | 2.706±0.228  | 9.41E-03 |
| cg05205664  | 11 | 73694566  | TSS1500                   | UCP2         | -4.586±0.554 | -4.984±0.504 | 9.69E-04 |
| cg14433673  | 11 | 73694579  | TSS1500                   | UCP2         | -6.09±0.566  | -6.601±0.619 | 9.93E-05 |
| cg07091552  | 11 | 73721170  | TSS1500                   | UCP3         | 2.516±0.137  | 2.616±0.177  | 1.72E-03 |
| cg17983274  | 11 | 73882285  | GeneBody/5'UTR/1st exon   | PPME1        | -5.083±0.638 | -5.712±0.59  | 1.99E-05 |
| cg00469635  | 11 | 73882471  | GeneBody/1st exon         | PPME1        | -5.046±0.373 | -5.347±0.631 | 1.79E-03 |
| cg15214137  | 11 | 74109221  | GeneBody/5'UTR/1st exon   | PGM2L1       | -4.508±0.347 | -4.753±0.453 | 2.53E-03 |
| cg09515805  | 11 | 74109729  | TSS1500                   | PGM2L1       | -4.667±0.408 | -4.998±0.474 | 4.49E-04 |
| cg08839620  | 11 | 74303786  | GeneBody/1st exon         | POLD3        | -5.343±0.542 | -5.679±0.526 | 4.25E-03 |
| cg10474368  | 11 | 74660190  | GeneBody/5'UTR/1st exon   | XRRRA1       | -6.026±0.759 | -6.733±0.661 | 4.05E-05 |
| cg17356532  | 11 | 74660536  | GeneBody/1st intron       | SPCS2        | -4.178±0.248 | -4.405±0.425 | 4.93E-04 |
| cg12573766  | 11 | 75110826  | GeneBody/1st intron       | RPS3         | -4.761±0.458 | -5.094±0.484 | 1.16E-03 |
| cg16547529  | 11 | 75140681  | GeneBody/1st intron       | KLHL35       | 0.506±0.315  | 0.686±0.299  | 8.16E-03 |
| cg27512828  | 11 | 75526058  | TSS200                    | UVRAG        | -3.983±0.338 | -4.275±0.514 | 5.58E-04 |
| cg20461541  | 11 | 76092535  | TSS1500                   | PRKRIR       | -5.096±0.554 | -5.693±0.61  | 7.93E-06 |
| cg22992570  | 11 | 76572061  | GeneBody/1st exon         | ACER3        | -5.124±0.388 | -5.521±0.538 | 4.03E-05 |
| cg16641915  | 11 | 76778247  | GeneBody/5'UTR/1st intron | CAPN5        | -4.625±0.377 | -4.885±0.558 | 4.55E-03 |
| cg17441778  | 11 | 76838677  | TSS1500                   | MYO7A        | -3.604±0.242 | -3.866±0.472 | 1.26E-04 |
| cg21086464  | 11 | 77184925  | GeneBody/5'UTR/1st exon   | PAK1         | -4.802±0.536 | -5.27±0.509  | 1.10E-04 |
| cg24715106  | 11 | 77301139  | GeneBody/1st exon         | AQP11        | -5.14±0.395  | -5.53±0.501  | 4.69E-05 |
| cg02901159  | 11 | 77348811  | GeneBody/5'UTR/1st exon   | CLNS1A       | -5.321±0.613 | -5.736±0.519 | 1.58E-03 |
| cg25126052  | 11 | 77705488  | GeneBody/1st intron       | INTS4        | -3.576±0.463 | -3.919±0.539 | 1.18E-03 |
| cg23692497  | 11 | 77706182  | TSS1500                   | INTS4        | -4.32±0.309  | -4.742±0.506 | 8.54E-07 |
| cg18338296  | 11 | 77775044  | GeneBody/1st exon         | THRSP        | 3.234±0.188  | 3.361±0.314  | 8.34E-03 |
| cg03476370  | 11 | 77791237  | GeneBody/5'UTR/1st exon   | NDUFC2       | -3.657±0.437 | -3.924±0.525 | 7.01E-03 |
| cg04574442  | 11 | 77850977  | GeneBody/1st exon         | KCTD21-AS1   | -4.529±0.356 | -4.924±0.509 | 1.28E-05 |
| cg18341054  | 11 | 78285295  | GeneBody/5'UTR/1st intron | NARS2        | -3.468±0.613 | -3.834±0.596 | 5.85E-03 |
| cg21373526  | 11 | 82782794  | GeneBody/5'UTR/1st exon   | RAB30        | -4.014±0.582 | -4.428±0.496 | 9.87E-04 |
| cg15749322  | 11 | 82905199  | TSS200                    | ANKRD42      | -4.442±0.516 | -4.95±0.555  | 2.91E-05 |
| cg19875047  | 11 | 82905709  | GeneBody/5'UTR/1st exon   | ANKRD42      | -4.977±0.445 | -5.308±0.376 | 6.02E-04 |
| cg19941758  | 11 | 82997468  | TSS200                    | CCDC90B      | -5.412±0.486 | -5.966±0.59  | 4.36E-06 |
| cg17597195  | 11 | 85339608  | TSS200                    | TMEM126B     | -5.364±0.465 | -5.687±0.473 | 1.71E-03 |
| cg16417437  | 11 | 85358767  | TSS200                    | TMEM126A     | -3.848±0.455 | -4.315±0.541 | 2.04E-05 |
| cg06698742  | 11 | 85359218  | GeneBody/5'UTR/1st intron | TMEM126A     | -5.189±0.511 | -5.487±0.545 | 8.12E-03 |
| cg10507961  | 11 | 85565852  | TSS1500                   | CCDC83       | -5.089±0.516 | -5.484±0.564 | 7.30E-04 |
| cg15822411  | 11 | 85566560  | GeneBody/5'UTR/1st exon   | CCDC83       | 2.084±0.177  | 2.194±0.17   | 4.21E-03 |
| cg25437402  | 11 | 85779802  | GeneBody/1st exon         | PICALM       | -5.604±0.551 | -6.3±0.68    | 8.15E-07 |
| cg15502446  | 11 | 86013224  | TSS200                    | C11orf73     | -4.415±0.567 | -4.85±0.555  | 5.51E-04 |
| cg17606683  | 11 | 86013447  | GeneBody/1st exon         | C11orf73     | -4.508±0.537 | -4.871±0.432 | 1.50E-03 |
| cg25500444  | 11 | 86086101  | GeneBody/5'UTR/1st exon   | CCDC81       | -2.279±0.3   | -2.563±0.402 | 1.05E-04 |
| cg01492649  | 11 | 86749237  | GeneBody/1st intron       | TMEM135      | -3.916±0.258 | -4.075±0.342 | 8.26E-03 |
| cg01761409  | 11 | 87908192  | GeneBody/1st intron       | RAB38        | -4.857±0.388 | -5.174±0.487 | 4.99E-04 |
| cg11670211  | 11 | 89224288  | GeneBody/1st intron       | NOX4         | -3.836±0.333 | -4.07±0.514  | 4.61E-03 |
| cg04209631  | 11 | 93474517  | GeneBody/5'UTR/1st exon   | TAF1D        | -5.224±0.632 | -5.653±0.568 | 1.66E-03 |
| cg03065661  | 11 | 93517413  | GeneBody/5'UTR/1st exon   | MED17        | -4.563±0.504 | -4.955±0.464 | 4.30E-04 |
| cg18113787  | 11 | 93517536  | GeneBody/5'UTR/1st exon   | MED17        | -4.917±0.461 | -5.254±0.499 | 1.14E-03 |
| cg23759214  | 11 | 94226925  | GeneBody/5'UTR/1st intron | MRE11A       | -3.596±0.289 | -3.839±0.333 | 2.86E-04 |
| cg20815063  | 11 | 94227320  | GeneBody/5'UTR/1st intron | ANKRD49      | -5.208±0.349 | -5.425±0.374 | 4.99E-03 |
| cg00796728  | 11 | 94276898  | TSS200                    | FUT4         | -4.665±0.386 | -4.912±0.45  | 4.63E-03 |
| cg12631737  | 11 | 94277190  | GeneBody/5'UTR/1st exon   | FUT4         | -3.585±0.17  | -3.841±0.351 | 9.74E-07 |
| cg20096208  | 11 | 94706512  | GeneBody/5'UTR/1st intron | CWC15        | -4.969±0.565 | -5.315±0.45  | 3.62E-03 |
| cg11665588  | 11 | 94963991  | GeneBody/1st exon         | SESN3        | -3.735±0.394 | -4.095±0.461 | 1.03E-04 |
| cg04303269  | 11 | 95523144  | TSS200                    | FAM76B       | -4.606±0.4   | -4.938±0.338 | 1.75E-04 |
| cg06044117  | 11 | 95523445  | TSS200                    | CEP57        | -5.699±0.619 | -6.348±0.617 | 9.44E-06 |
| cg07060572  | 11 | 96076205  | GeneBody/5'UTR/1st exon   | MAML2        | -5±0.476     | -5.28±0.427  | 5.80E-03 |
| cg04280758  | 11 | 96076485  | TSS200                    | MAML2        | -5.614±0.637 | -5.985±0.481 | 5.18E-03 |
| cg01651364  | 11 | 96122651  | GeneBody/5'UTR/1st intron | CCDC82       | -5.277±0.475 | -5.647±0.384 | 3.54E-04 |
| cg07013734  | 11 | 101454683 | TSS200                    | TRPC6        | -3.949±0.406 | -4.26±0.503  | 1.01E-03 |

|            |    |           |                           |          |              |              |          |
|------------|----|-----------|---------------------------|----------|--------------|--------------|----------|
| cg26369667 | 11 | 101981789 | GeneBody/1st exon         | YAP1     | -5.349±0.592 | -5.795±0.817 | 1.66E-03 |
| cg14481222 | 11 | 102187974 | TSS1500                   | BIRC3    | -3.556±0.521 | -3.978±0.499 | 2.83E-04 |
| cg14727952 | 11 | 102218358 | GeneBody/5'UTR/1st exon   | BIRC2    | -4.073±0.419 | -4.379±0.36  | 7.82E-04 |
| cg06259570 | 11 | 102576094 | GeneBody/1st intron       | MMP27    | 1.477±0.167  | 1.608±0.253  | 1.54E-03 |
| cg02061229 | 11 | 102651208 | GeneBody/1st intron       | MMP10    | -1.338±0.221 | -1.471±0.292 | 9.77E-03 |
| cg18928687 | 11 | 102962862 | GeneBody/5'UTR/1st exon   | DCUN1D5  | -5.902±0.473 | -6.312±0.563 | 2.15E-04 |
| cg11995303 | 11 | 102963161 | TSS1500                   | DCUN1D5  | -4.739±0.307 | -5.189±0.473 | 1.34E-07 |
| cg07748540 | 11 | 104034619 | GeneBody/1st exon         | PDGFD    | -4.743±0.504 | -5.195±0.469 | 7.48E-05 |
| cg08469834 | 11 | 104839074 | GeneBody/1st intron       | CASP4    | -3.616±0.425 | -4.071±0.521 | 1.19E-05 |
| cg14758526 | 11 | 104879683 | GeneBody/1st intron       | CASP5    | 2.738±0.287  | 2.925±0.24   | 2.17E-03 |
| cg09980522 | 11 | 105481802 | GeneBody/1st exon         | GRIA4    | -1.41±0.399  | -1.015±0.566 | 7.10E-05 |
| cg26289824 | 11 | 105948485 | TSS200                    | KBTBD3   | -4.869±0.344 | -5.349±0.425 | 1.29E-07 |
| cg18934103 | 11 | 107729434 | GeneBody/1st exon         | SLC35F2  | -5.139±0.379 | -5.363±0.349 | 5.81E-03 |
| cg05090725 | 11 | 107799287 | GeneBody/5'UTR/1st exon   | RAB39A   | -4.636±0.406 | -4.96±0.506  | 6.52E-04 |
| cg09006267 | 11 | 107992538 | GeneBody/1st intron       | ACAT1    | -4.799±0.283 | -4.999±0.501 | 7.23E-03 |
| cg03165700 | 11 | 108093220 | GeneBody/1st intron       | NPAT     | -4.786±0.781 | -5.35±0.787  | 1.11E-03 |
| cg18457775 | 11 | 108093680 | GeneBody/5'UTR/1st exon   | ATM      | -5.317±0.677 | -5.858±0.622 | 3.10E-04 |
| cg22477592 | 11 | 108093921 | GeneBody/5'UTR/1st intron | ATM      | -6.086±0.629 | -6.912±0.656 | 2.47E-07 |
| cg24027342 | 11 | 108131609 | GeneBody                  | ATM      | 1.477±0.155  | 1.905±0.616  | 3.96E-08 |
| cg02420102 | 11 | 108338162 | GeneBody/5'UTR/1st intron | C11orf65 | -4.668±0.485 | -4.976±0.493 | 3.72E-03 |
| cg13613532 | 11 | 108338397 | TSS200                    | C11orf65 | -4.816±0.417 | -5.158±0.48  | 3.89E-04 |
| cg13759143 | 11 | 108464102 | GeneBody/1st intron       | EXPH5    | -4.443±0.308 | -4.701±0.342 | 2.63E-04 |
| cg21414598 | 11 | 108464417 | TSS200                    | EXPH5    | -4.209±0.387 | -4.529±0.474 | 4.17E-04 |
| cg24936630 | 11 | 108535499 | TSS1500                   | DDX10    | -4.243±0.438 | -4.638±0.541 | 1.42E-04 |
| cg23074401 | 11 | 108535840 | GeneBody/5'UTR/1st exon   | DDX10    | -5.078±0.383 | -5.31±0.509  | 9.76E-03 |
| cg23352579 | 11 | 110166753 | GeneBody/5'UTR/1st intron | RDX      | -4.736±0.312 | -5.187±0.493 | 2.03E-07 |
| cg01015879 | 11 | 110167749 | TSS1500                   | RDX      | -4.088±0.322 | -4.39±0.551  | 3.78E-04 |
| cg26736524 | 11 | 110300429 | TSS1500                   | FDX1     | -4.913±0.525 | -5.225±0.51  | 5.95E-03 |
| cg03242880 | 11 | 111382915 | GeneBody/5'UTR/1st exon   | BTG4     | 2.355±0.169  | 2.548±0.192  | 3.47E-06 |
| cg10797910 | 11 | 111473380 | GeneBody/1st exon         | SIK2     | -5.596±0.558 | -6.013±0.702 | 1.34E-03 |
| cg22582569 | 11 | 111636425 | GeneBody/1st intron       | PPP2R1B  | -3.959±0.446 | -4.49±0.537  | 2.03E-06 |
| cg10219037 | 11 | 111750118 | GeneBody/1st exon         | FDXACB1  | -4.723±0.681 | -5.404±0.656 | 1.77E-05 |
| cg17213552 | 11 | 111895577 | GeneBody/5'UTR/1st exon   | DLAT     | -5.153±0.303 | -5.417±0.301 | 1.27E-04 |
| cg00327185 | 11 | 111896498 | GeneBody/1st intron       | DLAT     | -2.663±0.17  | -2.815±0.256 | 3.58E-04 |
| cg11909865 | 11 | 111944731 | GeneBody/5'UTR/1st exon   | PIH1D2   | -4.588±0.675 | -5.045±0.654 | 1.92E-03 |
| cg06910048 | 11 | 111945509 | GeneBody/5'UTR/1st exon   | C11orf57 | -4.48±0.255  | -4.697±0.389 | 6.51E-04 |
| cg14145762 | 11 | 111945650 | GeneBody/5'UTR/1st intron | C11orf57 | -3.508±0.488 | -3.891±0.49  | 4.76E-04 |
| cg17639290 | 11 | 111957166 | GeneBody/1st intron       | TIMM8B   | -4.326±0.517 | -4.63±0.634  | 9.97E-03 |
| cg03950669 | 11 | 111957582 | GeneBody/5'UTR/1st exon   | SDHD     | -5.786±0.634 | -6.174±0.607 | 4.58E-03 |
| cg02119229 | 11 | 112046248 | GeneBody/5'UTR/1st exon   | BCO2     | -4.685±0.434 | -4.949±0.457 | 5.76E-03 |
| cg04936930 | 11 | 112096887 | TSS200                    | PTS      | -4.917±0.27  | -5.093±0.276 | 2.99E-03 |
| cg12177743 | 11 | 113185079 | TSS200                    | TTCT12   | -4.59±0.415  | -4.83±0.386  | 7.11E-03 |
| cg05225390 | 11 | 113644407 | GeneBody/5'UTR/1st exon   | ZW10     | -5.615±0.468 | -5.895±0.604 | 9.80E-03 |
| cg01404197 | 11 | 113644652 | TSS200                    | ZW10     | -4.244±0.294 | -4.057±0.297 | 3.80E-03 |
| cg04628008 | 11 | 113931000 | TSS1500                   | ZBTB16   | -5.143±0.707 | -5.61±0.692  | 2.43E-03 |
| cg17048483 | 11 | 114271079 | GeneBody/5'UTR/1st exon   | C11orf71 | -4.657±0.309 | -5.101±0.463 | 1.69E-07 |
| cg24270244 | 11 | 114271111 | GeneBody/5'UTR/1st exon   | C11orf71 | -5.507±0.437 | -5.776±0.396 | 4.04E-03 |
| cg15541315 | 11 | 114309932 | TSS200                    | REXO2    | -4.984±0.591 | -5.397±0.512 | 1.19E-03 |
| cg16222698 | 11 | 114310578 | GeneBody/1st intron       | REXO2    | -4.647±0.451 | -5.069±0.589 | 1.10E-04 |
| cg02788102 | 11 | 115374969 | GeneBody/1st intron       | CADM1    | -3.363±0.352 | -3.585±0.479 | 7.47E-03 |
| cg06418878 | 11 | 116643266 | GeneBody/1st intron       | BUD13    | -4.795±0.362 | -5.1±0.454   | 3.53E-04 |
| cg23306832 | 11 | 116968354 | GeneBody/1st intron       | SIK3     | -3.416±0.608 | -3.776±0.506 | 5.06E-03 |
| cg26794638 | 11 | 116969404 | TSS1500                   | SIK3     | -4.692±0.492 | -5.04±0.423  | 1.07E-03 |
| cg03805364 | 11 | 117015176 | GeneBody/5'UTR/1st intron | PAFAH1B2 | -4.812±0.242 | -5.124±0.433 | 4.38E-06 |
| cg16822189 | 11 | 117187018 | TSS200                    | BACE1    | -5.482±0.528 | -6.152±0.606 | 6.24E-07 |
| cg13828839 | 11 | 117747166 | GeneBody/5'UTR/1st intron | FXYD6    | -4.659±0.589 | -5.103±0.64  | 8.24E-04 |
| cg24612198 | 11 | 118175631 | GeneBody/5'UTR            | CD3E     | 0.652±0.292  | 0.319±0.397  | 7.07E-06 |
| cg15880738 | 11 | 118215112 | GeneBody/5'UTR/1st exon   | CD3G     | 1.249±0.217  | 1.098±0.287  | 3.01E-03 |
| cg12406460 | 11 | 118271996 | TSS200                    | ATP5L    | -4.989±0.595 | -5.324±0.491 | 7.50E-03 |
| cg23740844 | 11 | 118272104 | GeneBody/1st exon         | ATP5L    | -3.797±0.268 | -3.986±0.357 | 2.69E-03 |
| cg04910299 | 11 | 118306353 | TSS1500                   | KMT2A    | -4.197±0.298 | -4.462±0.517 | 7.45E-04 |
| cg13656360 | 11 | 118307782 | GeneBody/1st intron       | KMT2A    | -3.777±0.215 | -3.937±0.28  | 1.57E-03 |
| cg23326785 | 11 | 118401071 | TSS1500                   | TMEM25   | -3.656±0.389 | -3.943±0.458 | 1.30E-03 |
| cg20001829 | 11 | 118402342 | GeneBody/5'UTR/1st intron | TMEM25   | -3.003±0.328 | -3.203±0.428 | 8.60E-03 |
| cg16332060 | 11 | 118436807 | TSS200                    | IFT46    | -4.165±0.475 | -4.555±0.684 | 7.84E-04 |
| cg22253036 | 11 | 118662786 | TSS1500                   | DDX6     | -3.148±0.629 | -3.712±0.585 | 7.63E-05 |
| cg11713029 | 11 | 118868622 | TSS1500                   | CCDC84   | -4.799±0.339 | -5.366±0.47  | 8.09E-09 |
| cg18801806 | 11 | 118869385 | GeneBody                  | CCDC84   | -2.912±0.244 | -3.204±0.346 | 3.67E-06 |
| cg11054882 | 11 | 118889578 | TSS200                    | MIR3656  | -3.327±0.29  | -3.568±0.304 | 2.61E-04 |
| cg24687335 | 11 | 118901407 | GeneBody/5'UTR            | SLC37A4  | -5.669±0.6   | -6.17±0.555  | 1.80E-04 |
| cg07330718 | 11 | 118927777 | GeneBody/5'UTR/1st exon   | HYOU1    | -4.656±0.504 | -5.208±0.702 | 1.39E-05 |
| cg01959004 | 11 | 118928411 | TSS1500                   | HYOU1    | -4.829±0.776 | -5.647±0.78  | 1.08E-05 |
| cg01924993 | 11 | 118966382 | TSS1500                   | H2AFX    | -5.171±0.349 | -5.6±0.562   | 4.66E-06 |
| cg26516941 | 11 | 118972455 | GeneBody/5'UTR/1st exon   | DPAGT1   | -4.695±0.331 | -4.941±0.31  | 7.04E-04 |
| cg02712845 | 11 | 118973038 | TSS1500                   | DPAGT1   | -4.789±0.571 | -5.115±0.522 | 7.44E-03 |
| cg11676109 | 11 | 118992413 | GeneBody/5'UTR/1st intron | HINFP    | -5.349±0.434 | -5.694±0.383 | 3.10E-04 |
| cg04410834 | 11 | 119019845 | GeneBody/5'UTR/1st exon   | ABCG4    | -5.07±0.357  | -5.353±0.408 | 5.30E-04 |
| cg26872475 | 11 | 119039430 | TSS200                    | NLRX1    | -4.025±0.295 | -4.298±0.397 | 1.40E-04 |
| cg11730691 | 11 | 119039440 | GeneBody/5'UTR/1st exon   | NLRX1    | -4.677±0.325 | -4.912±0.312 | 9.69E-04 |
| cg04964702 | 11 | 119076556 | TSS1500                   | CBL      | -3.818±0.704 | -4.274±0.577 | 2.30E-03 |
| cg22223602 | 11 | 119077220 | GeneBody/1st exon         | CBL      | -4.735±0.473 | -5.15±0.489  | 1.27E-04 |
| cg13272258 | 11 | 119252474 | TSS200                    | USP2-AS1 | -5.39±0.527  | -5.755±0.469 | 1.38E-03 |
| cg12508624 | 11 | 119293780 | GeneBody/5'UTR/1st intron | THY1     | -3.895±0.312 | -4.114±0.502 | 5.43E-03 |
| cg23009046 | 11 | 119600595 | TSS1500                   | PVRL1    | -3.237±0.358 | -3.531±0.4   | 3.54E-04 |
| cg04531254 | 11 | 120195822 | TSS200                    | TMEM136  | -3.378±0.319 | -3.578±0.407 | 6.60E-03 |
| cg18567470 | 11 | 120208005 | GeneBody/1st intron       | ARHGEF12 | -3.778±0.396 | -4.06±0.438  | 1.54E-03 |
| cg15737168 | 11 | 120974095 | GeneBody/1st intron       | TECTA    | 2.529±0.224  | 2.687±0.223  | 1.36E-03 |
| cg13421924 | 11 | 121163141 | TSS1500                   | SC5D     | -4.376±0.489 | -4.732±0.517 | 1.15E-03 |
| cg10977115 | 11 | 122709471 | GeneBody/1st intron       | CRTAM    | 1.231±0.305  | 1.029±0.357  | 3.54E-03 |
| cg21795497 | 11 | 122753326 | GeneBody/5'UTR/1st exon   | C11orf63 | -3.492±0.482 | -3.773±0.501 | 7.89E-03 |
| cg03694261 | 11 | 122753977 | GeneBody/5'UTR/1st intron | C11orf63 | -4.612±0.314 | -4.989±0.494 | 6.07E-06 |
| cg22843446 | 11 | 123066252 | TSS1500                   | CLMP     | -4.482±0.329 | -4.704±0.459 | 4.65E-03 |
| cg10448528 | 11 | 123612020 | GeneBody/5'UTR/1st intron | ZNF202   | -5.344±0.625 | -5.748±0.547 | 2.55E-03 |
| cg05236037 | 11 | 123612483 | TSS200                    | ZNF202   | -4.801±0.401 | -5.096±0.357 | 7.39E-04 |
| cg21295467 | 11 | 123986166 | GeneBody/5'UTR/1st exon   | VWA5A    | -4.805±0.6   | -5.195±0.499 | 2.24E-03 |

|             |    |           |                           |              |              |              |          |
|-------------|----|-----------|---------------------------|--------------|--------------|--------------|----------|
| cg13932624  | 11 | 124492608 | TSS200                    | TBRG1        | -5.467±0.501 | -5.866±0.517 | 4.10E-04 |
| cg20737712  | 11 | 124492803 | GeneBody/1st exon         | TBRG1        | -4.147±0.367 | -4.384±0.542 | 7.73E-03 |
| cg21929875  | 11 | 124622096 | GeneBody/5'UTR/1st exon   | VSIG2        | 0.965±0.195  | 1.107±0.266  | 2.13E-03 |
| cg18170080  | 11 | 124631981 | GeneBody/1st exon         | ESAM         | -3.629±0.189 | -3.798±0.323 | 6.71E-04 |
| cg03332970  | 11 | 124632552 | TSS1500                   | ESAM         | -4.89±0.615  | -5.492±0.567 | 2.24E-05 |
| cg204447773 | 11 | 124670426 | GeneBody/1st exon         | LOC100507283 | -5.325±0.477 | -5.944±0.612 | 6.25E-07 |
| cg10261191  | 11 | 125364744 | GeneBody/5'UTR/1st intron | FEZ1         | -0.754±0.312 | -0.553±0.322 | 3.50E-03 |
| cg08221207  | 11 | 125366421 | TSS1500                   | FEZ1         | -3.508±0.297 | -3.744±0.369 | 6.52E-04 |
| cg26606064  | 11 | 125439070 | TSS1500                   | EI24         | -1.292±0.488 | -0.692±0.642 | 1.69E-06 |
| cg05739825  | 11 | 125439882 | GeneBody/5'UTR/1st intron | EI24         | -4.5±0.359   | -4.774±0.467 | 1.17E-03 |
| cg03474731  | 11 | 125495234 | GeneBody/5'UTR/1st exon   | CHEK1        | -4.33±0.363  | -4.628±0.442 | 4.44E-04 |
| cg00066153  | 11 | 125550744 | GeneBody/5'UTR/1st exon   | ACRV1        | 2.644±0.214  | 2.78±0.222   | 3.70E-03 |
| cg12802819  | 11 | 125773242 | TSS200                    | PUS3         | -4.467±0.343 | -4.669±0.269 | 4.98E-03 |
| cg19857537  | 11 | 126081181 | GeneBody/1st intron       | RPUSD4       | -4.173±0.243 | -4.404±0.384 | 2.13E-04 |
| cg01991383  | 11 | 126139007 | TSS200                    | FOXRED1      | -5.26±0.609  | -5.626±0.664 | 6.74E-03 |
| cg13952892  | 11 | 126140110 | GeneBody/1st intron       | FOXRED1      | 2.883±0.198  | 3.052±0.296  | 5.83E-04 |
| cg14755009  | 11 | 126153305 | GeneBody/5'UTR/1st intron | TIRAP        | -5.319±0.386 | -5.618±0.333 | 3.97E-04 |
| cg01234063  | 11 | 126226007 | GeneBody/5'UTR/1st exon   | ST3GAL4      | -4.184±0.427 | -4.579±0.446 | 6.29E-05 |
| cg14998713  | 11 | 128391908 | GeneBody/5'UTR/1st exon   | ETS1         | -4.499±0.455 | -4.789±0.583 | 6.01E-03 |
| cg11861730  | 11 | 128392683 | TSS1500                   | ETS1         | -4.217±0.27  | -4.437±0.393 | 9.42E-04 |
| cg13755070  | 11 | 128563714 | TSS200                    | FLI1         | -4.096±0.532 | -4.478±0.49  | 9.85E-04 |
| cg14481339  | 11 | 128737319 | TSS200                    | KCNJ1        | 0.877±0.163  | 1.002±0.259  | 2.32E-03 |
| cg15948326  | 11 | 128775691 | TSS200                    | C11orf45     | -4.486±0.263 | -4.843±0.447 | 1.16E-06 |
| cg18913951  | 11 | 129685362 | TSS1500                   | TMEM45B      | 3.965±0.299  | 4.239±0.322  | 7.78E-05 |
| cg21022435  | 11 | 129763918 | TSS1500                   | NFRKB        | 3.012±0.166  | 3.216±0.296  | 9.40E-06 |
| cg02323334  | 11 | 129872621 | GeneBody/1st exon         | LINC00167    | -5.574±0.53  | -6.018±0.608 | 2.90E-04 |
| cg13058581  | 11 | 129872885 | TSS200                    | PRDM10       | -4.356±0.394 | -4.727±0.512 | 9.59E-05 |
| cg00156216  | 11 | 129939849 | GeneBody/5'UTR/1st exon   | APLP2        | -4.883±0.646 | -5.491±0.665 | 4.96E-05 |
| cg09084200  | 11 | 134095863 | GeneBody/1st intron       | VPS26B       | -1.595±0.161 | -1.715±0.238 | 2.36E-03 |
| cg23927367  | 11 | 134122802 | GeneBody/5'UTR            | THYN1        | -5.166±0.49  | -5.526±0.465 | 8.41E-04 |
| cg19966618  | 11 | 134123407 | TSS200                    | ACAD8        | -4.338±0.38  | -4.60±0.462  | 2.58E-03 |
| cg25999867  | 11 | 134145940 | TSS1500                   | GLB1L3       | -4.487±0.402 | -4.826±0.421 | 2.17E-04 |
| cg11781389  | 11 | 134201462 | TSS1500                   | GLB1L2       | -3.972±0.433 | -4.346±0.554 | 2.87E-04 |
| cg11012046  | 11 | 134202336 | GeneBody/1st intron       | GLB1L2       | -4.319±0.455 | -4.734±0.669 | 2.47E-04 |
| cg11225935  | 12 | 498478    | TSS200                    | CCDC77       | -4.962±0.358 | -5.278±0.481 | 2.61E-04 |
| cg12425673  | 12 | 862975    | GeneBody/1st exon         | WNK1         | -4.642±0.311 | -4.929±0.503 | 3.42E-04 |
| cg15612927  | 12 | 1058210   | GeneBody/5'UTR/1st intron | RAD52        | -3.794±0.367 | -4.186±0.509 | 2.13E-05 |
| cg10377764  | 12 | 1059224   | TSS1500                   | RAD52        | -4.724±0.254 | -4.927±0.319 | 6.62E-04 |
| cg08197201  | 12 | 1099823   | TSS1500                   | ERC1         | -5.638±0.36  | -5.984±0.4   | 4.58E-05 |
| cg17416608  | 12 | 1101044   | GeneBody/5'UTR/1st intron | ERC1         | -4.007±0.313 | -4.343±0.404 | 1.38E-05 |
| cg22151768  | 12 | 1702874   | GeneBody/1st exon         | FBXL14       | -5.641±0.515 | -5.998±0.76  | 4.45E-03 |
| cg27470406  | 12 | 1704156   | TSS1500                   | FBXL14       | -5.634±0.586 | -6.121±0.497 | 1.70E-04 |
| cg24505122  | 12 | 1726292   | GeneBody/5'UTR/1st exon   | WNT5B        | 2.426±0.275  | 2.733±0.293  | 4.36E-06 |
| cg20033731  | 12 | 2161371   | TSS1500                   | CACNA1C      | -3.659±0.335 | -3.893±0.463 | 3.38E-03 |
| cg18776056  | 12 | 2904912   | GeneBody/1st intron       | FKBP4        | -5.062±0.537 | -5.439±0.501 | 1.27E-03 |
| cg22837289  | 12 | 2921745   | TSS200                    | ITFG2        | -4.44±0.429  | -4.742±0.371 | 1.10E-03 |
| cg07128330  | 12 | 2921958   | GeneBody/1st exon         | ITFG2        | -5.147±0.59  | -5.581±0.645 | 1.09E-03 |
| cg09976774  | 12 | 2986037   | GeneBody/5'UTR/1st intron | FOXM1        | -4.088±0.231 | -4.282±0.407 | 1.45E-03 |
| cg00770871  | 12 | 2999840   | TSS200                    | TULP3        | -5.714±0.509 | -6.174±0.551 | 9.66E-05 |
| cg22016818  | 12 | 3000126   | GeneBody/1st exon         | TULP3        | -5.1±0.556   | -5.531±0.566 | 5.35E-04 |
| cg16405575  | 12 | 3186173   | TSS1500                   | TSPAN9       | -5.045±0.407 | -5.345±0.436 | 1.04E-03 |
| cg17904739  | 12 | 3861567   | GeneBody/5'UTR/1st intron | EFCAB4B      | -1.92±0.308  | -2.13±0.416  | 4.01E-03 |
| cg08761447  | 12 | 3982140   | GeneBody/1st intron       | PARP11       | -3.001±0.452 | -2.656±0.543 | 9.81E-04 |
| cg25425078  | 12 | 4381777   | TSS1500                   | CCND2        | -4.508±0.418 | -4.891±0.558 | 1.57E-04 |
| cg14914982  | 12 | 4382985   | GeneBody/5'UTR/1st exon   | CCND2        | -4.22±0.274  | -4.016±0.281 | 8.40E-04 |
| cg26989531  | 12 | 4383117   | GeneBody/5'UTR/1st exon   | CCND2        | -1.754±0.417 | -2.011±0.468 | 5.89E-03 |
| cg16310717  | 12 | 4383619   | GeneBody/1st intron       | CCND2        | -2.072±0.452 | -2.388±0.565 | 2.49E-03 |
| cg12382902  | 12 | 4383699   | GeneBody/1st intron       | CCND2        | -5.197±0.52  | -5.676±0.585 | 8.00E-05 |
| cg16994506  | 12 | 4383724   | GeneBody/1st intron       | CCND2        | -3.996±0.338 | -4.211±0.495 | 8.53E-03 |
| cg08069899  | 12 | 4383770   | GeneBody/1st intron       | CCND2        | -3.641±0.241 | -3.973±0.361 | 4.21E-07 |
| cg13801381  | 12 | 4384022   | GeneBody/1st intron       | CCND2        | -4.964±0.411 | -5.499±0.564 | 7.53E-07 |
| cg05308484  | 12 | 4429999   | TSS1500                   | C12orf5      | -5.241±0.446 | -5.49±0.384  | 8.32E-03 |
| cg18124330  | 12 | 4430774   | GeneBody/1st intron       | C12orf5      | -4.543±0.342 | -4.942±0.43  | 3.37E-06 |
| cg01731341  | 12 | 4554295   | GeneBody/1st intron       | FGF6         | 2.371±0.289  | 2.596±0.339  | 7.30E-04 |
| cg16512727  | 12 | 4649136   | GeneBody/1st intron       | RAD51AP1     | -0.451±0.182 | -0.572±0.244 | 4.98E-03 |
| cg04254119  | 12 | 4754247   | GeneBody/5'UTR            | AKAP3        | 2.815±0.238  | 3.016±0.268  | 2.46E-04 |
| cg18796520  | 12 | 4758272   | GeneBody/5'UTR/1st exon   | NDUFA9       | -4.616±0.402 | -4.988±0.457 | 7.93E-05 |
| cg16004800  | 12 | 4758496   | GeneBody/1st intron       | NDUFA9       | -4.183±0.468 | -4.461±0.358 | 4.39E-03 |
| cg13255190  | 12 | 4829286   | TSS1500                   | GALNT8       | 0.761±0.195  | 0.635±0.198  | 3.24E-03 |
| cg26590537  | 12 | 5020202   | GeneBody/5'UTR            | KCNA1        | -3.758±0.323 | -3.959±0.38  | 6.02E-03 |
| cg11620873  | 12 | 6309515   | GeneBody/5'UTR/1st exon   | CD9          | -4.525±0.382 | -4.788±0.373 | 1.64E-03 |
| cg00973286  | 12 | 6451130   | GeneBody/5'UTR/1st exon   | TNFRSF1A     | -4.321±0.281 | -4.535±0.419 | 1.94E-03 |
| cg22155248  | 12 | 6560794   | TSS200                    | CD27-AS1     | -3.645±0.498 | -3.983±0.515 | 2.15E-03 |
| cg25750404  | 12 | 6579648   | GeneBody/1st intron       | VAMP1        | -4.297±0.332 | -4.513±0.292 | 2.37E-03 |
| cg23877831  | 12 | 6603428   | GeneBody/5'UTR/1st intron | NCAPD2       | -4.222±0.648 | -4.735±0.646 | 4.07E-04 |
| cg20917484  | 12 | 6644066   | TSS1500                   | GAPDH        | -4.574±0.506 | -4.909±0.507 | 2.54E-03 |
| cg16579101  | 12 | 6677158   | GeneBody/5'UTR/1st intron | NOP2         | -4.735±0.738 | -5.37±0.508  | 8.62E-05 |
| cg00824109  | 12 | 6716566   | TSS200                    | CHD4         | -4.961±0.722 | -5.477±0.576 | 8.47E-04 |
| cg03930474  | 12 | 6772637   | TSS1500                   | ING4         | -4.173±0.397 | -4.612±0.464 | 6.29E-06 |
| cg01856985  | 12 | 6798404   | GeneBody/5'UTR/1st exon   | ZNF384       | -4.91±0.353  | -5.198±0.411 | 4.13E-04 |
| cg23311549  | 12 | 6862849   | TSS1500                   | MLF2         | -4.357±0.297 | -4.726±0.408 | 1.72E-06 |
| cg17805404  | 12 | 6930624   | TSS1500                   | GPR162       | -4.002±0.271 | -4.187±0.453 | 7.62E-03 |
| cg23360251  | 12 | 6937593   | GeneBody/5'UTR/1st exon   | LEPREL2      | -4.387±0.598 | -4.997±0.564 | 1.23E-05 |
| cg15942562  | 12 | 6959471   | GeneBody                  | CDCA3        | 2.729±0.228  | 2.909±0.302  | 8.53E-04 |
| cg15264303  | 12 | 7013902   | GeneBody/5'UTR/1st exon   | LRRC23       | -2.932±0.489 | -2.532±0.614 | 5.09E-04 |
| cg15411984  | 12 | 7014090   | GeneBody/5'UTR/1st exon   | LRRC23       | -4.521±0.313 | -4.767±0.548 | 2.76E-03 |
| cg22475430  | 12 | 7033563   | TSS200                    | ATN1         | -4.72±0.547  | -5.105±0.446 | 1.04E-03 |
| cg01437411  | 12 | 7033911   | GeneBody/5'UTR/1st intron | ATN1         | -1.974±0.269 | -2.222±0.339 | 1.15E-04 |
| cg26754448  | 12 | 7052799   | TSS1500                   | C12orf57     | -2.584±0.416 | -2.221±0.527 | 2.43E-04 |
| cg05170326  | 12 | 7125723   | GeneBody/1st exon         | LPCAT3       | -5.478±0.444 | -5.776±0.544 | 3.42E-03 |
| cg26021103  | 12 | 7126013   | TSS200                    | LPCAT3       | -4.909±0.379 | -5.228±0.553 | 6.17E-04 |
| cg16236875  | 12 | 7245112   | TSS200                    | C1R          | -3.096±0.253 | -3.361±0.361 | 3.21E-05 |
| cg15776355  | 12 | 7245890   | TSS1500                   | C1R          | -2.102±0.225 | -2.258±0.276 | 2.57E-03 |
| cg22593785  | 12 | 7261970   | TSS200                    | C1RL         | -4.529±0.432 | -4.88±0.509  | 4.59E-04 |
| cg15569340  | 12 | 7282490   | TSS1500                   | CLSTN3       | -4.555±0.306 | -4.738±0.318 | 6.29E-03 |

|             |    |          |                           |                   |              |              |          |
|-------------|----|----------|---------------------------|-------------------|--------------|--------------|----------|
| cg10885645  | 12 | 7283027  | GeneBody/5'UTR/1st exon   | <i>CLSTN3</i>     | -4.414±0.234 | -4.763±0.394 | 1.78E-07 |
| cg12448934  | 12 | 7283049  | GeneBody/5'UTR/1st exon   | <i>CLSTN3</i>     | -4.882±0.354 | -5.19±0.385  | 1.61E-04 |
| cg16879115  | 12 | 7819180  | TSS1500                   | <i>APOBEC1</i>    | 1.078±0.258  | 0.886±0.362  | 1.96E-03 |
| cg13323752  | 12 | 8025567  | TSS200                    | <i>SLC2A14</i>    | -3.83±0.634  | -4.27±0.707  | 2.02E-03 |
| cg10338338  | 12 | 8088931  | TSS200                    | <i>SLC2A3</i>     | -3.12±0.481  | -3.512±0.436 | 2.39E-04 |
| cg08571203  | 12 | 8185931  | GeneBody/5'UTR/1st exon   | <i>FOXJ2</i>      | -5.165±0.399 | -5.573±0.501 | 2.69E-05 |
| cg23205183  | 12 | 8216109  | GeneBody/5'UTR/1st intron | <i>C3AR1</i>      | 1.358±0.362  | 1.123±0.511  | 6.69E-03 |
| cg01007201  | 12 | 8275205  | TSS1500                   | <i>CLEC4A</i>     | 2.234±0.159  | 2.49±0.308   | 1.29E-07 |
| cg12581035  | 12 | 9067477  | GeneBody/5'UTR/1st intron | <i>PHC1</i>       | -5.609±0.572 | -6.17±0.738  | 5.47E-05 |
| cg26520371  | 12 | 9102400  | TSS200                    | <i>M6PR</i>       | -4.422±0.267 | -4.654±0.256 | 1.22E-04 |
| cg00443307  | 12 | 9141740  | TSS1500                   | <i>KLRG1</i>      | 0.806±0.245  | 0.647±0.357  | 7.26E-03 |
| cg08865050  | 12 | 9601258  | TSS1500                   | <i>DDX12P</i>     | -4.626±0.338 | -4.97±0.442  | 3.39E-05 |
| cg25136926  | 12 | 9602219  | TSS1500                   | <i>DDX12P</i>     | 1.104±0.193  | 1.331±0.308  | 9.70E-06 |
| cg08752459  | 12 | 10022682 | TSS1500                   | <i>CLEC2B</i>     | -1.98±0.446  | -2.343±0.372 | 2.19E-04 |
| cg27190239  | 12 | 10085174 | TSS200                    | <i>CLEC2A</i>     | -0.182±0.331 | -0.442±0.372 | 5.75E-04 |
| cg09565688  | 12 | 10161879 | TSS1500                   | <i>CLEC12B</i>    | 1.655±0.225  | 1.511±0.263  | 4.64E-03 |
| cg06915165  | 12 | 10364933 | TSS1500                   | <i>GABARAPL1</i>  | -4.571±0.369 | -4.844±0.506 | 1.95E-03 |
| cg24401912  | 12 | 10826432 | GeneBody/5'UTR/1st intron | <i>STYK1</i>      | -4.18±0.292  | -4.454±0.408 | 1.37E-04 |
| cg03876622  | 12 | 10876230 | TSS1500                   | <i>YBX3</i>       | -2.735±0.396 | -2.306±0.566 | 1.93E-05 |
| cg24653967  | 12 | 11037084 | TSS1500                   | <i>PRH1</i>       | 3.14±0.254   | 3.309±0.273  | 2.76E-03 |
| cg14502651  | 12 | 11081604 | TSS1500                   | <i>PRH2</i>       | 2.67±0.24    | 2.851±0.246  | 7.30E-04 |
| cg12424907  | 12 | 11151522 | TSS1500                   | <i>TAS2R20</i>    | 3.672±0.196  | 3.848±0.327  | 5.54E-04 |
| cg25677688  | 12 | 11176386 | TSS1500                   | <i>TAS2R19</i>    | 2.305±0.381  | 1.853±0.505  | 3.04E-06 |
| cg15062795  | 12 | 11802217 | TSS1500                   | <i>ETV6</i>       | -4.328±0.412 | -4.594±0.581 | 6.80E-03 |
| cg01939597  | 12 | 11803199 | GeneBody/1st intron       | <i>ETV6</i>       | -5.157±0.356 | -5.39±0.327  | 2.42E-03 |
| cg111175476 | 12 | 12419201 | GeneBody/1st intron       | <i>LRP6</i>       | -2.044±0.439 | -2.296±0.45  | 8.66E-03 |
| cg03272031  | 12 | 12509922 | GeneBody/1st exon         | <i>LOH12CR2</i>   | -5.479±0.498 | -5.82±0.478  | 1.74E-03 |
| cg18383069  | 12 | 12510241 | GeneBody/5'UTR/1st exon   | <i>LOH12CR1</i>   | -5.319±0.581 | -5.645±0.482 | 7.59E-03 |
| cg06700265  | 12 | 12715028 | GeneBody/5'UTR/1st intron | <i>DUSP16</i>     | -5.447±0.44  | -5.803±0.538 | 5.26E-04 |
| cg09819033  | 12 | 12764631 | TSS200                    | <i>CREBL2</i>     | -5.234±0.392 | -5.484±0.398 | 3.65E-03 |
| cg00261552  | 12 | 12764894 | GeneBody/5'UTR/1st exon   | <i>CREBL2</i>     | -4.372±0.519 | -4.882±0.47  | 2.03E-05 |
| cg08849126  | 12 | 13044370 | GeneBody/5'UTR/1st exon   | <i>GPRC5A</i>     | -4.123±0.244 | -4.437±0.405 | 2.63E-06 |
| cg04588079  | 12 | 13153012 | GeneBody/1st exon         | <i>HEBP1</i>      | -4.944±0.482 | -5.233±0.594 | 8.68E-03 |
| cg26648592  | 12 | 13153907 | GeneBody/1st exon         | <i>HTR7P1</i>     | -4.477±0.469 | -4.935±0.457 | 2.64E-05 |
| cg13264741  | 12 | 14133426 | TSS1500                   | <i>GRIN2B</i>     | -3.841±0.483 | -4.225±0.496 | 4.12E-04 |
| cg11697652  | 12 | 14518872 | GeneBody/5'UTR/1st intron | <i>ATF7IP</i>     | -4.553±0.716 | -5.046±0.668 | 1.55E-03 |
| cg05060662  | 12 | 14923882 | GeneBody/1st exon         | <i>HIST4H4</i>    | -4.632±0.373 | -4.919±0.426 | 7.90E-04 |
| cg14341030  | 12 | 14956580 | GeneBody/5'UTR/1st exon   | <i>C12orf60</i>   | -5.29±0.614  | -5.731±0.524 | 8.93E-04 |
| cg09447105  | 12 | 15126020 | GeneBody/5'UTR/1st exon   | <i>PDE6H</i>      | 2.805±0.163  | 2.957±0.254  | 2.35E-04 |
| cg27196745  | 12 | 15475319 | GeneBody/5'UTR/1st exon   | <i>PTPRO</i>      | -2.695±0.311 | -2.89±0.457  | 9.69E-03 |
| cg09470640  | 12 | 15476028 | GeneBody/1st intron       | <i>PTPRO</i>      | -4.12±0.368  | -4.344±0.433 | 7.01E-03 |
| cg19075838  | 12 | 15941986 | GeneBody/5'UTR/1st intron | <i>EPS8</i>       | -4.763±0.432 | -5.097±0.506 | 7.95E-04 |
| cg01868559  | 12 | 16034962 | TSS1500                   | <i>STRAP</i>      | -5.273±0.451 | -5.745±0.493 | 1.20E-05 |
| cg05243815  | 12 | 16035684 | GeneBody/1st exon         | <i>STRAP</i>      | -5.533±0.422 | -5.979±0.367 | 6.38E-06 |
| cg13108328  | 12 | 19282261 | TSS1500                   | <i>PLEKHA5</i>    | -3.671±0.455 | -3.938±0.529 | 8.97E-03 |
| cg02744459  | 12 | 21654197 | GeneBody/5'UTR/1st intron | <i>RECQL</i>      | -4.205±0.404 | -4.486±0.422 | 1.72E-03 |
| cg20701850  | 12 | 21655265 | GeneBody/1st intron       | <i>GOLT1B</i>     | -4.804±0.338 | -5.105±0.344 | 1.00E-04 |
| cg06437004  | 12 | 21810458 | GeneBody/5'UTR/1st exon   | <i>LDHB</i>       | -4.638±0.25  | -4.782±0.235 | 7.34E-03 |
| cg16218424  | 12 | 22198973 | TSS200                    | <i>CMAS</i>       | -3.008±0.328 | -3.224±0.353 | 3.03E-03 |
| cg00769520  | 12 | 22488465 | TSS1500                   | <i>ST8SIA1</i>    | -4.445±0.337 | -4.656±0.311 | 3.63E-03 |
| cg03764352  | 12 | 22777989 | TSS200                    | <i>ETNK1</i>      | -4.595±0.288 | -4.806±0.364 | 1.72E-03 |
| cg24012034  | 12 | 22778485 | GeneBody/1st exon         | <i>ETNK1</i>      | -5.603±0.46  | -5.864±0.472 | 9.41E-03 |
| cg10158080  | 12 | 24715864 | TSS1500                   | <i>SOX5</i>       | -4.745±0.448 | -5.086±0.414 | 5.44E-04 |
| cg07537523  | 12 | 25102311 | GeneBody/5'UTR/1st exon   | <i>BCAT1</i>      | -4.095±0.433 | -4.408±0.455 | 1.19E-03 |
| cg10150530  | 12 | 25205468 | GeneBody/5'UTR/1st exon   | <i>LRMP</i>       | -2.934±0.343 | -3.191±0.407 | 1.12E-03 |
| cg18394848  | 12 | 25403102 | GeneBody/5'UTR/1st intron | <i>KRAS</i>       | -4.569±0.417 | -4.83±0.533  | 6.80E-03 |
| cg00584022  | 12 | 25403167 | GeneBody/5'UTR/1st intron | <i>KRAS</i>       | -4.967±0.571 | -5.379±0.451 | 7.71E-04 |
| cg11276198  | 12 | 25404189 | TSS1500                   | <i>KRAS</i>       | -5.197±0.538 | -5.557±0.579 | 2.65E-03 |
| cg15758700  | 12 | 25707667 | TSS1500                   | <i>IFLTD1</i>     | 0.76±0.271   | 0.552±0.346  | 1.10E-03 |
| cg22946876  | 12 | 26111213 | TSS1500                   | <i>RASSF8-AS1</i> | -4.291±0.315 | -4.665±0.526 | 1.05E-05 |
| cg03046445  | 12 | 26277826 | GeneBody/5'UTR/1st exon   | <i>BHLHE41</i>    | -3.435±0.261 | -3.607±0.294 | 3.50E-03 |
| cg19243777  | 12 | 26278767 | TSS1500                   | <i>BHLHE41</i>    | -4.275±0.355 | -4.547±0.413 | 8.37E-04 |
| cg19574623  | 12 | 26348512 | GeneBody/5'UTR/1st exon   | <i>SSPN</i>       | -2.444±0.2   | -2.659±0.337 | 5.25E-05 |
| cg24509668  | 12 | 26348529 | GeneBody/5'UTR/1st exon   | <i>SSPN</i>       | -2.479±0.167 | -2.661±0.269 | 3.31E-05 |
| cg00495491  | 12 | 26822813 | GeneBody                  | <i>ITPR2</i>      | 1.363±0.164  | 1.471±0.198  | 3.84E-03 |
| cg02677802  | 12 | 26822870 | GeneBody                  | <i>ITPR2</i>      | 1.065±0.119  | 1.178±0.24   | 8.19E-04 |
| cg03966406  | 12 | 26985412 | GeneBody/1st intron       | <i>ITPR2</i>      | -4.166±0.305 | -4.564±0.41  | 6.57E-07 |
| cg02569086  | 12 | 26985672 | GeneBody/1st exon         | <i>ITPR2</i>      | -4.698±0.324 | -5.057±0.438 | 1.08E-05 |
| cg24082826  | 12 | 26985738 | GeneBody/5'UTR/1st exon   | <i>ITPR2</i>      | -4.577±0.287 | -4.903±0.414 | 9.53E-06 |
| cg20787196  | 12 | 26987031 | TSS1500                   | <i>ITPR2</i>      | -3.606±0.329 | -3.837±0.395 | 2.22E-03 |
| cg05289701  | 12 | 27090805 | GeneBody/5'UTR/1st exon   | <i>ASUN</i>       | -3.781±0.258 | -4.101±0.318 | 1.12E-06 |
| cg17061853  | 12 | 27091905 | GeneBody/5'UTR/1st intron | <i>FGFR1OP2</i>   | -4.216±0.36  | -4.579±0.382 | 2.00E-05 |
| cg27076812  | 12 | 27167565 | TSS1500                   | <i>TM7SF3</i>     | -4.403±0.657 | -4.882±0.577 | 8.09E-04 |
| cg13236637  | 12 | 27175529 | GeneBody/1st exon         | <i>MED21</i>      | -5.086±0.715 | -5.668±0.659 | 2.52E-04 |
| cg01986577  | 12 | 27485373 | TSS1500                   | <i>ARNTL2</i>     | -2.356±0.181 | -2.502±0.274 | 1.14E-03 |
| cg13325261  | 12 | 27486075 | GeneBody/1st intron       | <i>ARNTL2</i>     | -5.521±0.509 | -5.912±0.526 | 6.01E-04 |
| cg06058319  | 12 | 27677138 | GeneBody/5'UTR/1st exon   | <i>PPFIBP1</i>    | -3.397±0.233 | -3.617±0.33  | 1.39E-04 |
| cg03176585  | 12 | 27863646 | TSS200                    | <i>MRPS35</i>     | -5.01±0.593  | -5.473±0.582 | 4.69E-04 |
| cg07289581  | 12 | 27864261 | GeneBody/1st intron       | <i>MRPS35</i>     | -4.517±0.34  | -4.845±0.395 | 4.82E-05 |
| cg19722847  | 12 | 30849114 | TSS200                    | <i>IPO8</i>       | -2.525±0.23  | -2.717±0.323 | 5.79E-04 |
| cg21369988  | 12 | 30907191 | GeneBody/5'UTR/1st exon   | <i>CAPRIN2</i>    | -4.819±0.239 | -4.98±0.28   | 2.79E-03 |
| cg09377899  | 12 | 31226606 | TSS200                    | <i>DDX11</i>      | -4.985±0.304 | -5.201±0.324 | 1.51E-03 |
| cg24789869  | 12 | 31227241 | TSS1500                   | <i>DDX11-AS1</i>  | -3.993±0.685 | -4.385±0.742 | 9.52E-03 |
| cg04600076  | 12 | 31478972 | GeneBody/5'UTR/1st exon   | <i>FAM60A</i>     | -4.157±0.283 | -4.502±0.436 | 4.07E-06 |
| cg11082575  | 12 | 31479096 | GeneBody/5'UTR/1st exon   | <i>FAM60A</i>     | -4.572±0.284 | -4.756±0.286 | 3.01E-03 |
| cg02342494  | 12 | 31812046 | TSS200                    | <i>METTL20</i>    | -3.403±0.598 | -3.762±0.688 | 7.48E-03 |
| cg08647727  | 12 | 31812705 | GeneBody/5'UTR/1st exon   | <i>METTL20</i>    | -3.423±0.37  | -3.754±0.482 | 1.93E-04 |
| cg09970396  | 12 | 32113004 | GeneBody/5'UTR/1st intron | <i>KIAA1551</i>   | -4.171±0.554 | -4.545±0.522 | 1.88E-03 |
| cg20180148  | 12 | 32832336 | GeneBody/1st exon         | <i>DNM1L</i>      | -5.085±0.394 | -5.524±0.563 | 1.20E-05 |
| cg23950724  | 12 | 33593177 | TSS1500                   | <i>SYT10</i>      | -0.783±0.239 | -0.956±0.359 | 3.13E-03 |
| cg20857455  | 12 | 39300142 | TSS1500                   | <i>CPNE8</i>      | -3.73±0.359  | -4.004±0.289 | 4.33E-04 |
| cg22560190  | 12 | 41086198 | TSS200                    | <i>CNTN1</i>      | -3.861±0.288 | -4.026±0.301 | 8.89E-03 |
| cg20352371  | 12 | 41831595 | GeneBody/5'UTR/1st exon   | <i>PDZRN4</i>     | 0.898±0.251  | 1.077±0.324  | 2.20E-03 |
| cg16863447  | 12 | 44229512 | TSS1500                   | <i>TMEM117</i>    | -3.498±0.201 | -3.609±0.165 | 8.51E-03 |
| cg23123694  | 12 | 46766543 | GeneBody/5'UTR/1st exon   | <i>SLC38A2</i>    | -5.467±0.494 | -5.863±0.662 | 7.79E-04 |

|             |    |          |                           |            |              |              |          |
|-------------|----|----------|---------------------------|------------|--------------|--------------|----------|
| cg10002103  | 12 | 46766730 | TSS200                    | SLC38A2    | -4.954±0.533 | -5.313±0.517 | 2.00E-03 |
| cg07473175  | 12 | 47474262 | TSS1500                   | AMIGO2     | -4.945±0.407 | -5.218±0.366 | 1.92E-03 |
| cg00811081  | 12 | 48099724 | GeneBody/5'UTR/1st intron | RPAP3      | -4.06±0.48   | -4.351±0.601 | 8.09E-03 |
| cg09114799  | 12 | 48152515 | TSS1500                   | RAPGEF3    | -3.026±0.159 | -3.227±0.292 | 7.40E-06 |
| cg24608308  | 12 | 48152844 | GeneBody/5'UTR/1st exon   | RAPGEF3    | -5.199±0.436 | -5.546±0.382 | 3.00E-04 |
| cg09818732  | 12 | 48166716 | TSS1500                   | SLC48A1    | -4.899±0.461 | -5.259±0.625 | 1.06E-03 |
| cg12391174  | 12 | 48167505 | GeneBody/1st intron       | SLC48A1    | -4.636±0.448 | -4.996±0.55  | 5.73E-04 |
| cg01291404  | 12 | 48397872 | GeneBody/1st intron       | COL2A1     | -4.105±0.295 | -4.417±0.408 | 2.36E-05 |
| cg19601035  | 12 | 48399140 | TSS1500                   | COL2A1     | -1.79±0.235  | -1.985±0.324 | 5.78E-04 |
| cg12629083  | 12 | 48499284 | TSS1500                   | PFKM       | -5.231±0.469 | -5.552±0.416 | 1.54E-03 |
| cg23069305  | 12 | 48500318 | TSS1500                   | SENP1      | -3.133±0.608 | -3.506±0.588 | 4.62E-03 |
| cg10200408  | 12 | 48551356 | GeneBody/5'UTR/1st exon   | ASB8       | -5.319±0.544 | -5.739±0.557 | 5.76E-04 |
| cg22385764  | 12 | 48551594 | TSS1500                   | ASB8       | -4.075±0.34  | -4.295±0.415 | 4.79E-03 |
| cg00745543  | 12 | 48722754 | TSS200                    | H1FNT      | 2.963±0.197  | 3.141±0.308  | 3.59E-04 |
| cg22103585  | 12 | 49110427 | GeneBody/1st exon         | CCNT1      | -5.375±0.346 | -5.72±0.482  | 5.93E-05 |
| cg11422541  | 12 | 49182586 | GeneBody/5'UTR/1st intron | ADCY6      | -4.589±0.6   | -4.993±0.595 | 2.09E-03 |
| cg24791546  | 12 | 49245534 | GeneBody/5'UTR/1st intron | DDX23      | -3.972±0.209 | -4.11±0.231  | 3.12E-03 |
| cg05065690  | 12 | 49246007 | TSS200                    | DDX23      | -4.063±0.193 | -4.198±0.206 | 1.73E-03 |
| cg24928378  | 12 | 49259415 | GeneBody/1st intron       | RND1       | -3.208±0.426 | -3.679±0.573 | 1.05E-05 |
| cg27241190  | 12 | 49259726 | TSS200                    | RND1       | -4.167±0.43  | -4.465±0.493 | 2.17E-03 |
| cg02620769  | 12 | 49298070 | GeneBody/5'UTR/1st exon   | CCDC65     | -3.918±0.318 | -4.132±0.433 | 4.44E-03 |
| cg11151811  | 12 | 49412422 | GeneBody/5'UTR/1st exon   | PRKAG1     | -5.35±0.364  | -5.566±0.349 | 5.91E-03 |
| cg22153481  | 12 | 49412872 | TSS1500                   | PRKAG1     | -4.991±0.549 | -5.427±0.477 | 3.07E-04 |
| cg13007988  | 12 | 49449136 | TSS200                    | KMT2D      | 0.703±0.252  | 0.523±0.359  | 3.07E-03 |
| cg14636377  | 12 | 49463506 | GeneBody/1st intron       | RHEBL1     | -5.228±0.376 | -5.453±0.348 | 5.30E-03 |
| cg14445076  | 12 | 49488709 | TSS200                    | DHH        | -2.068±0.235 | -1.89±0.358  | 2.18E-03 |
| cg05919661  | 12 | 49504308 | GeneBody/1st exon         | LMBR1L     | -4.582±0.381 | -4.923±0.436 | 1.28E-04 |
| cg17066382  | 12 | 49504767 | TSS200                    | LMBR1L     | -4.864±0.54  | -5.326±0.516 | 1.46E-04 |
| cg21300561  | 12 | 49525534 | TSS1500                   | TUBA1B     | -5.083±0.369 | -5.554±0.52  | 1.21E-06 |
| cg14802310  | 12 | 49582599 | GeneBody/1st intron       | TUBA1A     | -1.798±0.488 | -2.104±0.428 | 4.25E-03 |
| cg24059075  | 12 | 49688316 | TSS1500                   | PRPH       | -1.273±0.189 | -1.388±0.241 | 9.02E-03 |
| cg25784394  | 12 | 49717037 | GeneBody/5'UTR/1st exon   | TROAP      | -5.059±0.365 | -5.275±0.365 | 6.61E-03 |
| cg17420360  | 12 | 49740840 | TSS200                    | DNAJC22    | -4.339±0.372 | -4.689±0.416 | 6.30E-05 |
| cg20102673  | 12 | 49933539 | GeneBody/1st intron       | KCNH3      | -2.052±0.225 | -2.313±0.304 | 4.98E-06 |
| cg15701622  | 12 | 49962302 | TSS1500                   | MCRS1      | -4.422±0.425 | -4.724±0.429 | 1.31E-03 |
| cg08512940  | 12 | 50016787 | TSS1500                   | PRPF40B    | -5.138±0.367 | -5.402±0.368 | 1.15E-03 |
| cg24138639  | 12 | 50135197 | TSS200                    | TMBIM6     | -5.019±0.495 | -5.393±0.445 | 5.61E-04 |
| cg05368762  | 12 | 50135785 | GeneBody/5'UTR/1st exon   | TMBIM6     | -5.176±0.303 | -5.542±0.528 | 1.08E-05 |
| cg19782075  | 12 | 50237049 | TSS200                    | BCDIN3D    | -3.502±0.593 | -3.906±0.534 | 1.62E-03 |
| cg07047653  | 12 | 50344626 | GeneBody/1st exon         | AQP2       | 2.536±0.167  | 2.658±0.221  | 1.91E-03 |
| cg11912049  | 12 | 50361401 | 0                         | 0          | -5.617±0.578 | -6.102±0.608 | 2.34E-04 |
| cg13615396  | 12 | 50418996 | GeneBody/5'UTR/1st intron | RACGAP1    | -4.501±0.556 | -4.937±0.639 | 6.31E-04 |
| cg18591973  | 12 | 50478751 | TSS1500                   | SMARCD1    | -4.92±0.614  | -5.506±0.593 | 3.53E-05 |
| cg07210490  | 12 | 50479634 | GeneBody/1st intron       | SMARCD1    | -4.461±0.412 | -5.04±0.512  | 1.23E-07 |
| cg25181284  | 12 | 50497037 | TSS1500                   | GPD1       | 2.701±0.203  | 2.867±0.183  | 2.43E-04 |
| cg01372605  | 12 | 50505957 | GeneBody/5'UTR/1st exon   | COX14      | -5.199±0.572 | -5.736±0.584 | 4.91E-05 |
| cg00973334  | 12 | 50561022 | GeneBody/1st exon         | CERS5      | -4.639±0.522 | -5.163±0.64  | 3.29E-05 |
| cg16619240  | 12 | 50677228 | GeneBody/5'UTR/1st exon   | LIMA1      | -5.405±0.497 | -5.753±0.472 | 1.36E-03 |
| cg12787624  | 12 | 50677281 | GeneBody/5'UTR/1st exon   | LIMA1      | -5.751±0.578 | -6.158±0.565 | 1.36E-03 |
| cg21570220  | 12 | 51419900 | GeneBody/5'UTR/1st exon   | SLC11A2    | -2.136±0.332 | -1.92±0.3    | 2.50E-03 |
| cg16362133  | 12 | 51420474 | TSS1500                   | SLC11A2    | -3.682±0.313 | -4.023±0.434 | 1.54E-05 |
| cg01322897  | 12 | 51442056 | TSS200                    | LETMD1     | -5.486±0.643 | -5.936±0.583 | 1.27E-03 |
| cg21686900  | 12 | 51632663 | GeneBody/5'UTR/1st exon   | DAZAP2     | -5.96±0.453  | -6.615±0.648 | 1.23E-07 |
| cg04752565  | 12 | 51664655 | TSS1500                   | SMAGP      | -2.891±0.557 | -3.229±0.608 | 6.24E-03 |
| cg27114026  | 12 | 51740258 | GeneBody/1st intron       | CELA1      | 2.428±0.18   | 2.545±0.222  | 4.42E-03 |
| cg11566199  | 12 | 51773594 | GeneBody/5'UTR            | GALNT6     | 2.823±0.174  | 2.942±0.227  | 3.52E-03 |
| cg14701410  | 12 | 51818681 | GeneBody/5'UTR/1st exon   | SLC4A8     | -4.834±0.3   | -5.117±0.575 | 6.52E-04 |
| cg10999429  | 12 | 52300973 | TSS1500                   | ACVRL1     | -4.343±0.263 | -4.7±0.456   | 1.36E-06 |
| cg09989134  | 12 | 52463648 | TSS200                    | C12orf44   | -5.593±0.448 | -6.074±0.484 | 7.85E-06 |
| cg23911972  | 12 | 52464081 | GeneBody/5'UTR/1st intron | C12orf44   | -5.869±0.432 | -6.116±0.424 | 8.34E-03 |
| cg24461814  | 12 | 52779281 | GeneBody/1st exon         | KRT84      | 2.528±0.171  | 2.654±0.218  | 1.59E-03 |
| cg13181284  | 12 | 52845687 | GeneBody/1st exon         | KRT6B      | 3.115±0.366  | 2.858±0.424  | 1.99E-03 |
| cg12795208  | 12 | 52845938 | TSS200                    | KRT6B      | 2.433±0.256  | 2.67±0.32    | 1.11E-04 |
| cg00213044  | 12 | 52886438 | GeneBody/1st exon         | KRT6A      | 1.329±0.142  | 1.466±0.22   | 1.50E-04 |
| cg20200335  | 12 | 52967554 | GeneBody/1st exon         | KRT74      | 2.322±0.186  | 2.496±0.295  | 2.63E-04 |
| cg18982568  | 12 | 53097169 | GeneBody/1st exon         | KRT77      | 1.854±0.273  | 1.656±0.316  | 1.38E-03 |
| cg171165266 | 12 | 53342635 | TSS200                    | KRT18      | -4.427±0.368 | -4.671±0.53  | 5.89E-03 |
| cg10624583  | 12 | 53440492 | TSS1500                   | TENC1      | -4.498±0.342 | -4.942±0.512 | 1.20E-06 |
| cg08567916  | 12 | 53473383 | TSS200                    | SPRYD3     | -5.456±0.596 | -5.87±0.568  | 1.50E-03 |
| cg01773854  | 12 | 53491219 | TSS1500                   | IGFBP6     | -3.432±0.241 | -3.615±0.348 | 1.77E-03 |
| cg08629913  | 12 | 53491633 | GeneBody/1st exon         | IGFBP6     | -4.944±0.362 | -5.272±0.544 | 2.89E-04 |
| cg08374799  | 12 | 53601050 | TSS200                    | ITGB7      | -1.452±0.343 | -1.162±0.457 | 4.17E-04 |
| cg22052955  | 12 | 53625898 | GeneBody/5'UTR/1st exon   | RARG       | -3.011±0.172 | -3.204±0.339 | 8.05E-05 |
| cg12835684  | 12 | 53645647 | TSS1500                   | MFSD5      | -3.74±0.251  | -3.966±0.358 | 2.59E-04 |
| cg05368089  | 12 | 53689374 | GeneBody/1st exon         | PFDN5      | -4.389±0.372 | -4.642±0.476 | 3.33E-03 |
| cg23032316  | 12 | 53715148 | GeneBody/1st exon         | AAAS       | -2.547±0.712 | -3.154±0.641 | 1.47E-04 |
| cg00495415  | 12 | 53773795 | TSS200                    | SP1        | -4.439±0.481 | -4.817±0.638 | 9.51E-04 |
| cg13510262  | 12 | 53774037 | GeneBody/5'UTR/1st exon   | SP1        | -3.149±0.183 | -3.402±0.356 | 2.70E-06 |
| cg18715299  | 12 | 53816275 | TSS1500                   | AMHR2      | 2.869±0.357  | 2.629±0.474  | 4.13E-03 |
| cg02765045  | 12 | 53845774 | TSS200                    | PCBP2      | -5.606±0.348 | -6.044±0.486 | 1.47E-06 |
| cg08959992  | 12 | 53846247 | GeneBody/5'UTR/1st intron | PCBP2      | -3.583±0.252 | -3.849±0.352 | 2.67E-05 |
| cg14903309  | 12 | 53894418 | TSS1500                   | TARBP2     | -4.676±0.38  | -5.115±0.54  | 6.49E-06 |
| cg18748332  | 12 | 54020076 | GeneBody/5'UTR/1st exon   | ATF7       | -4.787±0.367 | -5.149±0.454 | 4.34E-05 |
| cg07992625  | 12 | 54020444 | TSS1500                   | ATF7       | -4.053±0.584 | -4.686±0.585 | 5.62E-06 |
| cg10186308  | 12 | 54121077 | GeneBody/5'UTR/1st intron | CALCOCO1   | -5.202±0.586 | -5.718±0.501 | 8.28E-05 |
| cg25917510  | 12 | 54402888 | TSS200                    | HOXC8      | -4.471±0.44  | -4.857±0.459 | 1.27E-04 |
| cg10593493  | 12 | 54411753 | GeneBody/5'UTR/1st intron | HOXC6      | -3.751±0.254 | -3.963±0.36  | 6.33E-04 |
| cg16983211  | 12 | 54427636 | TSS200                    | MIR615     | -3.625±0.547 | -3.937±0.529 | 8.03E-03 |
| cg24488435  | 12 | 54583029 | TSS1500                   | SMUG1      | -4.033±0.267 | -4.195±0.294 | 6.19E-03 |
| cg05754589  | 12 | 54674412 | TSS200                    | HNRNPA1    | -4.165±0.558 | -4.682±0.609 | 7.08E-05 |
| cg14981132  | 12 | 54675468 | GeneBody                  | HNRNPA1P10 | -3.238±0.435 | -3.65±0.535  | 7.26E-05 |
| cg27205791  | 12 | 54719080 | GeneBody/1st intron       | COP21      | -5.274±0.443 | -5.541±0.449 | 5.89E-03 |
| cg16770799  | 12 | 54812606 | GeneBody/1st intron       | ITGA5      | -4.111±0.505 | -4.439±0.603 | 4.26E-03 |
| cg16718891  | 12 | 54813155 | TSS200                    | ITGA5      | -4.407±0.204 | -4.582±0.225 | 1.94E-04 |
| cg17523380  | 12 | 54982643 | TSS200                    | PPP1R1A    | -4.611±0.395 | -4.993±0.529 | 7.81E-05 |

|            |    |          |                           |              |              |              |          |
|------------|----|----------|---------------------------|--------------|--------------|--------------|----------|
| cg17532978 | 12 | 55413394 | TSS1500                   | NEUROD4      | -3.309±0.351 | -3.531±0.495 | 8.15E-03 |
| cg16360444 | 12 | 56102181 | TSS1500                   | ITGA7        | -3.49±0.361  | -3.817±0.363 | 7.77E-05 |
| cg08346269 | 12 | 56110020 | TSS200                    | BLOC1S1      | -3.817±0.195 | -3.941±0.255 | 6.25E-03 |
| cg01929065 | 12 | 56122634 | GeneBody/5'UTR/1st exon   | CD63         | -5.708±0.537 | -6.086±0.527 | 1.36E-03 |
| cg27215108 | 12 | 56132323 | GeneBody/5'UTR/1st exon   | CD63         | -3.732±0.195 | -3.94±0.354  | 9.66E-05 |
| cg21667943 | 12 | 56210943 | GeneBody/1st intron       | SARNP        | -3.106±0.524 | -3.43±0.569  | 5.33E-03 |
| cg16660717 | 12 | 56211781 | TSS200                    | ORMDL2       | -5.08±0.496  | -5.382±0.552 | 6.16E-03 |
| cg13887370 | 12 | 56224128 | TSS1500                   | DNAJC14      | -4.784±0.321 | -5.184±0.441 | 1.59E-06 |
| cg00129774 | 12 | 56360414 | GeneBody/5'UTR/1st intron | PMEL         | -4.337±0.354 | -4.831±0.475 | 1.68E-07 |
| cg22781397 | 12 | 56360787 | GeneBody/5'UTR/1st exon   | CDK2         | -5.043±0.376 | -5.277±0.344 | 3.82E-03 |
| cg04108502 | 12 | 56360908 | GeneBody/1st exon         | CDK2         | -4.811±0.338 | -5.136±0.438 | 7.06E-05 |
| cg24693620 | 12 | 56367689 | TSS200                    | RAB5B        | -5.71±0.612  | -6.132±0.525 | 1.34E-03 |
| cg06495347 | 12 | 56391451 | GeneBody/5'UTR            | SUOX         | -1.993±0.23  | -1.847±0.229 | 3.57E-03 |
| cg09011597 | 12 | 56497759 | TSS1500                   | PA2G4        | -4.107±0.378 | -4.422±0.419 | 2.81E-04 |
| cg05347567 | 12 | 56512408 | GeneBody/5'UTR/1st intron | ZC3H10       | -3.663±0.428 | -3.397±0.555 | 7.38E-03 |
| cg11206763 | 12 | 56521692 | TSS1500                   | ESYT1        | -4.852±0.309 | -5.227±0.44  | 3.03E-06 |
| cg21609430 | 12 | 56522453 | GeneBody/1st exon         | ESYT1        | -5.555±0.552 | -6.042±0.664 | 1.78E-04 |
| cg07315445 | 12 | 56551994 | TSS200                    | MYL6         | -5.155±0.364 | -5.36±0.344  | 8.65E-03 |
| cg16237595 | 12 | 56615720 | TSS200                    | RNF41        | -4.939±0.406 | -5.419±0.653 | 9.15E-06 |
| cg05435853 | 12 | 56615825 | TSS200                    | RNF41        | -4.023±0.397 | -4.348±0.5   | 5.06E-04 |
| cg11722639 | 12 | 56618199 | GeneBody/5'UTR/1st exon   | NABP2        | -4.801±0.453 | -5.081±0.619 | 8.93E-03 |
| cg00668685 | 12 | 56624552 | GeneBody/5'UTR/1st exon   | SLC39A5      | 2.581±0.187  | 2.79±0.287   | 1.81E-05 |
| cg09658438 | 12 | 56693554 | GeneBody/1st intron       | CS           | -4±0.285     | -4.158±0.255 | 8.78E-03 |
| cg26265187 | 12 | 56728980 | TSS1500                   | PAN2         | 3.309±0.331  | 3.486±0.247  | 9.92E-03 |
| cg21800439 | 12 | 56753886 | GeneBody/5'UTR/1st exon   | STAT2        | -5.058±0.665 | -5.51±0.702  | 2.19E-03 |
| cg05388361 | 12 | 56754238 | TSS1500                   | STAT2        | -5.392±0.583 | -5.932±0.587 | 5.75E-05 |
| cg00819696 | 12 | 56843016 | GeneBody/5'UTR/1st intron | TIMELESS     | -5.523±0.561 | -6.182±0.622 | 2.05E-06 |
| cg12264551 | 12 | 56862370 | GeneBody/5'UTR/1st exon   | SPRYD4       | -5.673±0.588 | -6.281±0.655 | 1.52E-05 |
| cg20877313 | 12 | 56881753 | GeneBody/1st exon         | GLS2         | -4.665±0.399 | -4.967±0.532 | 1.45E-03 |
| cg14679587 | 12 | 56882324 | TSS200                    | GLS2         | -3.973±0.397 | -4.33±0.507  | 1.66E-04 |
| cg25683012 | 12 | 57030113 | GeneBody/5'UTR/1st exon   | BAZ2A        | -5.336±0.464 | -5.723±0.371 | 1.48E-04 |
| cg14634319 | 12 | 57030450 | TSS1500                   | BAZ2A        | -4.125±0.319 | -4.428±0.366 | 5.76E-05 |
| cg17616707 | 12 | 57039822 | GeneBody/5'UTR/1st exon   | ATP5B        | -4.811±0.317 | -5.288±0.472 | 6.75E-08 |
| cg22012054 | 12 | 57039895 | TSS200                    | ATP5B        | -4.279±0.453 | -4.56±0.403  | 4.59E-03 |
| cg05872485 | 12 | 57081186 | GeneBody/1st intron       | PTGES3       | -4.513±0.336 | -4.741±0.35  | 2.13E-03 |
| cg04413986 | 12 | 57119373 | TSS200                    | NACA         | -4.531±0.577 | -5.118±0.683 | 2.39E-05 |
| cg24269846 | 12 | 57146087 | GeneBody/5'UTR/1st exon   | PRIM1        | -5.832±0.674 | -6.318±0.59  | 8.90E-04 |
| cg19847271 | 12 | 57146332 | TSS200                    | PRIM1        | -4.702±0.588 | -5.219±0.618 | 1.28E-04 |
| cg21922731 | 12 | 57157130 | GeneBody/5'UTR/1st exon   | HSD17B6      | -1.699±0.208 | -1.909±0.364 | 1.61E-04 |
| cg00472136 | 12 | 57410604 | TSS1500                   | TAC3         | 1.743±0.177  | 1.854±0.184  | 4.39E-03 |
| cg17639059 | 12 | 57483108 | GeneBody/1st exon         | NAB2         | -5.587±0.673 | -6.002±0.613 | 4.01E-03 |
| cg01063813 | 12 | 57504948 | GeneBody/1st exon         | STAT6        | -3.335±0.44  | -3.734±0.504 | 1.07E-04 |
| cg20779414 | 12 | 57505882 | TSS1500                   | STAT6        | -4.54±0.328  | -4.801±0.323 | 3.76E-04 |
| cg07159490 | 12 | 57610078 | TSS1500                   | NXPH4        | -4.723±0.442 | -5.075±0.528 | 6.02E-04 |
| cg11468462 | 12 | 57610686 | GeneBody/5'UTR/1st exon   | NXPH4        | -4.826±0.466 | -5.197±0.536 | 5.41E-04 |
| cg23240961 | 12 | 57634410 | GeneBody/5'UTR/1st intron | NDUFA4L2     | -5.939±0.626 | -6.605±0.64  | 7.92E-06 |
| cg21878918 | 12 | 57634762 | TSS1500                   | NDUFA4L2     | -4.225±0.323 | -4.495±0.412 | 4.14E-04 |
| cg22630748 | 12 | 57848870 | TSS1500                   | INHBE        | 1.162±0.186  | 1.287±0.199  | 2.57E-03 |
| cg21660687 | 12 | 57853396 | TSS1500                   | GLI1         | -4.473±0.341 | -4.717±0.434 | 2.12E-03 |
| cg24141135 | 12 | 57881924 | GeneBody/1st exon         | MARS         | -5.548±0.593 | -5.974±0.647 | 1.38E-03 |
| cg15021531 | 12 | 57913928 | GeneBody/5'UTR/1st intron | DDIT3        | -4.141±0.242 | -4.468±0.375 | 7.38E-07 |
| cg17703658 | 12 | 57914352 | TSS200                    | DDIT3        | -5.157±0.362 | -5.372±0.313 | 5.12E-03 |
| cg10058540 | 12 | 57941150 | TSS200                    | DCTN2        | -4.175±0.452 | -4.439±0.442 | 7.02E-03 |
| cg04270799 | 12 | 57944059 | GeneBody/1st exon         | KIF5A        | -3.472±0.312 | -3.229±0.353 | 6.48E-04 |
| cg24009736 | 12 | 58026342 | GeneBody/5'UTR/1st exon   | B4GALNT1     | -4.058±0.287 | -4.227±0.292 | 7.14E-03 |
| cg09163317 | 12 | 58027197 | TSS200                    | B4GALNT1     | -4.557±0.546 | -4.939±0.584 | 1.73E-03 |
| cg14789804 | 12 | 58087958 | GeneBody/1st exon         | OS9          | -4.48±0.308  | -4.812±0.412 | 1.54E-05 |
| cg10018778 | 12 | 58138402 | TSS1500                   | TSPAN31      | -4.998±0.37  | -5.254±0.607 | 6.22E-03 |
| cg22490255 | 12 | 58138949 | GeneBody/1st exon         | TSPAN31      | -4.892±0.477 | -5.164±0.406 | 7.04E-03 |
| cg09504352 | 12 | 58146286 | TSS200                    | CDK4         | -5.535±0.357 | -5.962±0.486 | 3.06E-06 |
| cg13289561 | 12 | 58166652 | GeneBody/1st exon         | METTL21B     | -4.66±0.262  | -4.855±0.288 | 9.89E-04 |
| cg23970338 | 12 | 58176483 | TSS200                    | TSMF         | -4.163±0.379 | -4.559±0.589 | 5.13E-05 |
| cg11762629 | 12 | 58240176 | GeneBody/1st exon         | CTDSP2       | -4.017±0.427 | -4.406±0.443 | 7.51E-05 |
| cg11871280 | 12 | 60082038 | TSS1500                   | SLC16A7      | 2.454±0.221  | 2.602±0.286  | 3.93E-03 |
| cg15736338 | 12 | 62586425 | GeneBody/5'UTR/1st exon   | FAM19A2      | -4.009±0.304 | -4.199±0.307 | 4.07E-03 |
| cg02460120 | 12 | 62653836 | TSS1500                   | USP15        | -4.82±0.465  | -5.234±0.554 | 1.54E-04 |
| cg12304441 | 12 | 62653866 | TSS1500                   | USP15        | -4.47±0.332  | -4.768±0.525 | 4.24E-04 |
| cg18915437 | 12 | 62654245 | GeneBody/1st exon         | USP15        | -6.065±0.532 | -6.65±0.589  | 5.82E-06 |
| cg21544377 | 12 | 62997103 | GeneBody/1st exon         | C12orf61     | -5.527±0.44  | -5.834±0.513 | 2.12E-03 |
| cg21137706 | 12 | 64173304 | TSS1500                   | TMEM5        | -4.696±0.491 | -5.035±0.511 | 1.84E-03 |
| cg21796825 | 12 | 64173751 | TSS200                    | TMEM5        | -6.067±0.564 | -6.436±0.54  | 2.56E-03 |
| cg07973246 | 12 | 64238719 | GeneBody/1st intron       | SRGAP1       | -4.298±0.315 | -4.529±0.451 | 2.51E-03 |
| cg04466273 | 12 | 64845556 | TSS1500                   | TBK1         | -4.851±0.373 | -5.315±0.476 | 1.20E-06 |
| cg21722680 | 12 | 64846210 | GeneBody/5'UTR/1st intron | TBK1         | -5.216±0.522 | -5.572±0.601 | 2.56E-03 |
| cg07915282 | 12 | 65003120 | TSS1500                   | RASSF3       | -3.344±0.445 | -3.67±0.51   | 1.27E-03 |
| cg12157010 | 12 | 65004958 | GeneBody/1st intron       | RASSF3       | -4.467±0.266 | -4.77±0.48   | 3.52E-05 |
| cg21935292 | 12 | 65152931 | GeneBody/1st exon         | GNS          | -5.262±0.316 | -5.557±0.488 | 2.41E-04 |
| cg03217102 | 12 | 65563486 | GeneBody/1st exon         | LEMD3        | -3.069±0.194 | -3.333±0.299 | 6.53E-07 |
| cg07641524 | 12 | 65672405 | TSS200                    | MSRB3        | -3.044±0.255 | -2.795±0.359 | 8.43E-05 |
| cg20430063 | 12 | 65672888 | GeneBody/5'UTR/1st intron | MSRB3        | -4.735±0.318 | -4.922±0.368 | 8.85E-03 |
| cg10654016 | 12 | 66524411 | GeneBody/5'UTR/1st intron | LLPH         | -4.025±0.521 | -4.377±0.557 | 2.35E-03 |
| cg14281160 | 12 | 66524943 | TSS1500                   | LLPH         | -3.717±0.377 | -3.948±0.481 | 8.05E-03 |
| cg04982748 | 12 | 66696283 | TSS200                    | HELB         | -3.441±0.202 | -3.663±0.337 | 3.72E-05 |
| cg11160386 | 12 | 68725932 | GeneBody/1st intron       | MDM1         | -4.618±0.316 | -4.897±0.523 | 6.28E-04 |
| cg21211608 | 12 | 69004270 | TSS1500                   | RAP1B        | -5.388±0.481 | -5.755±0.413 | 4.82E-04 |
| cg15092544 | 12 | 69004670 | GeneBody/5'UTR/1st exon   | RAP1B        | -6.038±0.431 | -6.593±0.714 | 2.66E-06 |
| cg07220442 | 12 | 69080635 | GeneBody/1st exon         | LOC100507250 | -4.589±0.482 | -4.895±0.434 | 3.01E-03 |
| cg10396470 | 12 | 69080893 | GeneBody/1st intron       | NUP107       | -4.001±0.271 | -4.246±0.473 | 6.41E-04 |
| cg20360244 | 12 | 69140065 | GeneBody/5'UTR/1st exon   | SLC35E3      | -5.012±0.424 | -5.318±0.596 | 2.63E-03 |
| cg12504957 | 12 | 69202060 | GeneBody/5'UTR/1st exon   | MDM2         | -5.398±0.401 | -5.726±0.508 | 5.23E-04 |
| cg24635866 | 12 | 69979163 | TSS200                    | CCT2         | -5.727±0.512 | -6.222±0.594 | 4.57E-05 |
| cg23197881 | 12 | 70133421 | GeneBody/5'UTR/1st exon   | RAB3IP       | -5.124±0.431 | -5.428±0.377 | 1.10E-03 |
| cg10464585 | 12 | 70636491 | TSS1500                   | CNOT2        | -2.569±0.424 | -2.05±0.59   | 2.35E-06 |
| cg16482226 | 12 | 70637792 | GeneBody/5'UTR/1st exon   | CNOT2        | -4.641±0.352 | -5.066±0.505 | 3.27E-06 |
| cg23096553 | 12 | 70759870 | TSS200                    | KCNMB4       | -5.426±0.468 | -5.987±0.581 | 1.98E-06 |

|            |    |           |                           |          |              |              |          |
|------------|----|-----------|---------------------------|----------|--------------|--------------|----------|
| cg10778619 | 12 | 70760807  | GeneBody/1st exon         | KCNMB4   | -4.787±0.469 | -5.055±0.381 | 6.39E-03 |
| cg17080277 | 12 | 71003576  | GeneBody/1st exon         | PTPRB    | -4.041±0.266 | -4.285±0.344 | 1.32E-04 |
| cg24373760 | 12 | 71834237  | GeneBody/1st intron       | LGR5     | -4.39±0.254  | -4.729±0.422 | 1.43E-06 |
| cg11821147 | 12 | 72057762  | TSS200                    | ZFC3H1   | -5.358±0.604 | -5.711±0.633 | 7.73E-03 |
| cg16909364 | 12 | 72057977  | TSS1500                   | ZFC3H1   | -4.651±0.563 | -5.137±0.49  | 1.13E-04 |
| cg11631518 | 12 | 75603585  | TSS200                    | KCNC2    | -3.164±0.376 | -3.474±0.388 | 2.70E-04 |
| cg21087137 | 12 | 75728469  | GeneBody/5'UTR/1st exon   | GLIPR1L1 | -4.354±0.28  | -4.052±0.337 | 1.01E-05 |
| cg26577178 | 12 | 75905604  | TSS200                    | KRR1     | -4.293±0.409 | -4.704±0.431 | 1.99E-05 |
| cg02947222 | 12 | 76425514  | GeneBody/1st exon         | PHLDA1   | -5.279±0.366 | -5.825±0.608 | 1.51E-07 |
| cg20095338 | 12 | 76478402  | GeneBody/5'UTR/1st exon   | NAP1L1   | -3.214±0.277 | -3.495±0.363 | 3.52E-05 |
| cg10027114 | 12 | 76742097  | GeneBody/1st exon         | BBS10    | -4.792±0.381 | -5.16±0.534  | 9.26E-05 |
| cg26248486 | 12 | 76742361  | TSS200                    | BBS10    | -5.53±0.432  | -5.782±0.374 | 5.96E-03 |
| cg17841529 | 12 | 76953712  | TSS200                    | OSBPL8   | -4.571±0.346 | -4.784±0.274 | 3.39E-03 |
| cg14957086 | 12 | 77272052  | GeneBody/5'UTR/1st intron | CSRP2    | -3.623±0.322 | -3.866±0.363 | 8.90E-04 |
| cg24979630 | 12 | 80329299  | TSS200                    | PPP1R12A | -4.324±0.6   | -4.725±0.532 | 1.86E-03 |
| cg00354572 | 12 | 81471419  | TSS1500                   | ACSS3    | -3.796±0.267 | -4.056±0.348 | 6.63E-05 |
| cg00685836 | 12 | 82153256  | TSS200                    | PPFIA2   | -4.26±0.455  | -4.56±0.569  | 4.20E-03 |
| cg13159566 | 12 | 82752887  | TSS1500                   | CCDC59   | -3.273±0.269 | -3.506±0.422 | 6.16E-04 |
| cg17415555 | 12 | 83081389  | GeneBody/1st exon         | TMTC2    | -5.361±0.506 | -5.762±0.554 | 4.96E-04 |
| cg14449051 | 12 | 85306474  | GeneBody/5'UTR/1st exon   | SLC6A15  | -4.84±0.424  | -5.127±0.568 | 4.03E-03 |
| cg14116122 | 12 | 85673884  | TSS200                    | ALX1     | -4.492±0.36  | -4.754±0.533 | 2.93E-03 |
| cg04916911 | 12 | 86268154  | GeneBody/5'UTR/1st exon   | NTS      | -3.488±0.216 | -3.813±0.395 | 3.08E-07 |
| cg13976438 | 12 | 88423076  | GeneBody/5'UTR/1st intron | C12orf50 | 2.065±0.32   | 2.265±0.263  | 3.11E-03 |
| cg07520161 | 12 | 88535980  | GeneBody/5'UTR/1st exon   | CEP290   | -4.308±0.36  | -4.749±0.441 | 1.36E-06 |
| cg18081750 | 12 | 89746418  | TSS200                    | DUSP6    | -4.821±0.32  | -5.019±0.438 | 8.86E-03 |
| cg16870320 | 12 | 89919900  | GeneBody/1st exon         | POC1B    | -5.424±0.554 | -5.883±0.554 | 2.36E-04 |
| cg24171152 | 12 | 90051243  | TSS1500                   | ATP2B1   | 3.18±0.265   | 3.385±0.305  | 7.29E-04 |
| cg13333141 | 12 | 92539687  | TSS200                    | BTG1     | -6.145±0.668 | -6.755±0.565 | 5.12E-05 |
| cg09848198 | 12 | 93323497  | TSS1500                   | EEA1     | -4.362±0.313 | -4.731±0.425 | 3.94E-06 |
| cg18116253 | 12 | 93836291  | TSS1500                   | UBE2N    | -4.133±0.398 | -4.464±0.468 | 3.52E-04 |
| cg15127806 | 12 | 93861418  | GeneBody/5'UTR/1st intron | MRPL42   | -4.461±0.235 | -4.646±0.257 | 5.31E-04 |
| cg15125424 | 12 | 93963354  | TSS1500                   | SOC2     | -3.419±0.35  | -3.648±0.501 | 6.39E-03 |
| cg12275348 | 12 | 93966045  | TSS1500                   | SOC2     | -4.969±0.374 | -5.22±0.316  | 1.68E-03 |
| cg11225410 | 12 | 93966317  | GeneBody/5'UTR/1st exon   | SOC2     | -4.981±0.444 | -5.33±0.505  | 6.09E-04 |
| cg04117338 | 12 | 94071150  | GeneBody/5'UTR/1st exon   | CRADD    | -5.212±0.641 | -5.633±0.602 | 2.42E-03 |
| cg22192762 | 12 | 94542778  | GeneBody/1st exon         | PLXNC1   | -5.182±0.739 | -5.713±0.565 | 7.76E-04 |
| cg01065920 | 12 | 95397325  | GeneBody/1st intron       | NDUFA12  | -5±0.454     | -5.399±0.498 | 1.39E-04 |
| cg19824362 | 12 | 95467522  | TSS200                    | NR2C1    | -5.293±0.457 | -5.712±0.553 | 1.12E-04 |
| cg23480499 | 12 | 95867566  | TSS1500                   | METAP2   | -4.812±0.726 | -5.281±0.655 | 2.64E-03 |
| cg19510484 | 12 | 95868044  | GeneBody/1st exon         | METAP2   | -4.158±0.504 | -4.54±0.485  | 6.27E-04 |
| cg18627852 | 12 | 96252602  | TSS200                    | SNRPF    | -5.451±0.469 | -5.864±0.494 | 1.26E-04 |
| cg05780616 | 12 | 96252764  | GeneBody/5'UTR/1st exon   | SNRPF    | -4.63±0.226  | -4.895±0.387 | 1.51E-05 |
| cg26240353 | 12 | 96429271  | GeneBody/1st exon         | LTA4H    | -4.888±0.509 | -5.416±0.525 | 1.14E-05 |
| cg26911787 | 12 | 96587734  | TSS1500                   | ELK3     | -3.533±0.381 | -3.755±0.415 | 8.28E-03 |
| cg15652120 | 12 | 96588210  | GeneBody/5'UTR/1st exon   | ELK3     | -3.872±0.384 | -4.148±0.308 | 8.25E-04 |
| cg12888961 | 12 | 96794220  | GeneBody/5'UTR/1st exon   | CDK17    | -4.375±0.308 | -4.697±0.548 | 1.12E-04 |
| cg17641104 | 12 | 96794247  | GeneBody/5'UTR/1st exon   | CDK17    | -4.991±0.25  | -4.794±0.448 | 2.87E-03 |
| cg07549630 | 12 | 97300822  | TSS200                    | NEDD1    | -5.52±0.368  | -5.906±0.657 | 1.06E-04 |
| cg23264519 | 12 | 98908939  | TSS1500                   | TMPO     | -4.372±0.51  | -4.747±0.542 | 1.02E-03 |
| cg11625178 | 12 | 98909434  | GeneBody/5'UTR/1st exon   | TMPO     | -5.268±0.449 | -5.539±0.507 | 6.88E-03 |
| cg17263089 | 12 | 98986181  | TSS1500                   | SLC25A3  | 1.921±0.406  | 1.639±0.394  | 1.58E-03 |
| cg19196182 | 12 | 99038046  | GeneBody/1st intron       | IKBIP    | -4.157±0.486 | -4.463±0.606 | 6.18E-03 |
| cg07865790 | 12 | 99038290  | GeneBody/1st intron       | IKBIP    | -5.311±0.426 | -5.757±0.436 | 1.03E-05 |
| cg14872956 | 12 | 99039015  | TSS200                    | APAF1    | -5.471±0.556 | -5.778±0.502 | 9.44E-03 |
| cg13338132 | 12 | 100041984 | GeneBody/1st exon         | FAM71C   | 2.949±0.238  | 3.238±0.307  | 1.90E-06 |
| cg27476329 | 12 | 10056955  | GeneBody/1st exon         | GOLGA2P5 | 1.659±0.268  | 1.875±0.291  | 3.97E-04 |
| cg09464487 | 12 | 100593423 | TSS1500                   | ACTR6    | -5.176±0.398 | -5.495±0.484 | 5.66E-04 |
| cg25516544 | 12 | 100660816 | GeneBody/1st exon         | DEPDC4   | -5.819±0.541 | -6.239±0.461 | 3.90E-04 |
| cg08132767 | 12 | 101801241 | GeneBody/1st intron       | ARL1     | -4.493±0.321 | -4.637±0.378 | 5.01E-03 |
| cg20866788 | 12 | 101802016 | TSS1500                   | ARL1     | -4.484±0.385 | -4.715±0.418 | 6.77E-03 |
| cg10935064 | 12 | 102133347 | TSS200                    | SYCP3    | 5.084±0.375  | 5.329±0.387  | 3.01E-03 |
| cg06554542 | 12 | 102224375 | GeneBody/1st exon         | GNPTAB   | -4.972±0.288 | -5.224±0.492 | 8.46E-04 |
| cg00136105 | 12 | 102224911 | TSS1500                   | GNPTAB   | -4.354±0.36  | -4.649±0.524 | 8.32E-04 |
| cg02806658 | 12 | 102513592 | TSS1500                   | PARPBP   | -4.632±0.352 | -5.051±0.47  | 3.04E-06 |
| cg05727959 | 12 | 102514075 | GeneBody/5'UTR/1st intron | PARPBP   | -5.648±0.402 | -5.891±0.356 | 4.47E-03 |
| cg20053158 | 12 | 103351206 | TSS1500                   | ASCL1    | -2.886±0.334 | -3.133±0.472 | 2.12E-03 |
| cg06462291 | 12 | 104235479 | TSS1500                   | NT5DC3   | -3.362±0.306 | -3.586±0.426 | 2.26E-03 |
| cg11207379 | 12 | 104359415 | TSS200                    | TDG      | -5.174±0.555 | -5.647±0.562 | 1.72E-04 |
| cg02246665 | 12 | 104458006 | TSS1500                   | HCF2     | -4.963±0.326 | -5.241±0.449 | 4.24E-04 |
| cg21226225 | 12 | 104680742 | GeneBody/5'UTR/1st exon   | TXNRD1   | -2.319±0.385 | -1.982±0.435 | 1.63E-04 |
| cg14127958 | 12 | 105630059 | TSS200                    | APPL2    | -5.365±0.565 | -5.777±0.506 | 8.26E-04 |
| cg21768899 | 12 | 105724426 | GeneBody/5'UTR/1st exon   | C12orf75 | -5.671±0.354 | -6.286±0.596 | 7.90E-09 |
| cg09239756 | 12 | 106642360 | TSS1500                   | CKAP4    | -4.424±0.415 | -4.831±0.422 | 2.62E-05 |
| cg02686769 | 12 | 106695932 | TSS1500                   | TCP11L2  | -4.791±0.311 | -5.015±0.411 | 2.20E-03 |
| cg24107581 | 12 | 106751417 | TSS200                    | POLR3B   | -4.002±0.485 | -4.276±0.41  | 7.37E-03 |
| cg26979339 | 12 | 107168153 | TSS1500                   | RIC8B    | -4.738±0.361 | -5.033±0.468 | 5.70E-04 |
| cg26297688 | 12 | 107349093 | TSS1500                   | C12orf23 | -4.08±0.444  | -4.412±0.519 | 1.06E-03 |
| cg10126874 | 12 | 107487097 | GeneBody/5'UTR/1st exon   | CRY1     | -5.294±0.407 | -5.671±0.719 | 5.07E-04 |
| cg17677842 | 12 | 108154370 | GeneBody/5'UTR            | PRDM4    | -5.321±0.483 | -5.698±0.672 | 1.18E-03 |
| cg24642516 | 12 | 108908742 | TSS1500                   | FICD     | -5.277±0.406 | -5.721±0.633 | 2.63E-05 |
| cg16054422 | 12 | 108954439 | GeneBody/1st intron       | SART3    | -4.669±0.42  | -4.938±0.544 | 5.80E-03 |
| cg03439805 | 12 | 109124743 | TSS200                    | CORO1C   | -3.947±0.441 | -4.281±0.414 | 5.89E-04 |
| cg01273150 | 12 | 109125569 | TSS1500                   | CORO1C   | -3.821±0.405 | -4.258±0.661 | 4.30E-05 |
| cg25149927 | 12 | 109250901 | GeneBody/1st intron       | SSH1     | -3.454±0.722 | -4.135±0.745 | 4.76E-05 |
| cg22801690 | 12 | 109274241 | GeneBody/5'UTR/1st intron | DAO      | 1.498±0.288  | 1.317±0.36   | 6.49E-03 |
| cg22449795 | 12 | 109490720 | GeneBody/1st intron       | USP30    | -4.892±0.312 | -5.265±0.427 | 3.29E-06 |
| cg22978941 | 12 | 109535460 | GeneBody/5'UTR/1st exon   | UNG      | -5.531±0.49  | -5.867±0.5   | 1.89E-03 |
| cg03048535 | 12 | 109747100 | TSS200                    | FOXN4    | -4.294±0.292 | -4.596±0.401 | 3.26E-05 |
| cg01335367 | 12 | 110172208 | GeneBody/5'UTR/1st intron | FAM222A  | -2.219±0.219 | -2.395±0.333 | 1.23E-03 |
| cg09194650 | 12 | 110337899 | TSS200                    | TCHP     | -4.817±0.357 | -5.114±0.448 | 4.18E-04 |
| cg10966500 | 12 | 110338339 | GeneBody/5'UTR/1st exon   | TCHP     | -5.044±0.492 | -5.531±0.486 | 2.13E-05 |
| cg09391966 | 12 | 110433837 | GeneBody/1st intron       | GIT2     | -5.26±0.416  | -5.656±0.567 | 1.00E-04 |
| cg12333095 | 12 | 110437035 | TSS200                    | ANKRD13A | -4.705±0.298 | -5.113±0.493 | 8.40E-07 |
| cg13928594 | 12 | 110562699 | GeneBody/5'UTR/1st intron | IFT81    | -4.522±0.351 | -4.74±0.33   | 4.02E-03 |
| cg18825539 | 12 | 110720126 | GeneBody/1st intron       | ATP2A2   | -4.926±0.444 | -5.279±0.454 | 4.14E-04 |



|            |    |           |                           |             |              |              |          |
|------------|----|-----------|---------------------------|-------------|--------------|--------------|----------|
| cg02501984 | 12 | 133263946 | TSS200                    | POLE        | -6.072±0.543 | -6.486±0.652 | 9.62E-04 |
| cg17903544 | 12 | 133286774 | TSS1500                   | PGAM5       | -4.297±0.394 | -4.614±0.518 | 7.25E-04 |
| cg20785344 | 12 | 133287770 | GeneBody/1st intron       | PGAM5       | -5.163±0.558 | -5.487±0.639 | 9.51E-03 |
| cg17272491 | 12 | 133405852 | TSS1500                   | GOLGA3      | -5.352±0.366 | -5.586±0.402 | 4.05E-03 |
| cg26609691 | 12 | 133430226 | GeneBody                  | CHFR        | 5.227±0.313  | 5.526±0.324  | 4.25E-05 |
| cg23653008 | 12 | 133464419 | TSS1500                   | CHFR        | -4.331±0.306 | -4.727±0.436 | 9.72E-07 |
| cg26530200 | 12 | 133656595 | TSS1500                   | ZNF140      | -3.259±0.378 | -3.61±0.513  | 1.40E-04 |
| cg18139900 | 12 | 133657153 | GeneBody/5'UTR/1st exon   | ZNF140      | -4.147±0.438 | -4.448±0.429 | 1.73E-03 |
| cg23881971 | 12 | 133706422 | GeneBody/5'UTR/1st intron | ZNF891      | -3.324±0.457 | -3.662±0.549 | 1.31E-03 |
| cg11754676 | 12 | 133706789 | GeneBody/5'UTR/1st intron | ZNF891      | -5.177±0.368 | -5.599±0.52  | 7.43E-06 |
| cg27005181 | 13 | 20208413  | GeneBody/1st intron       | MPHOSPH8    | -5.189±0.675 | -5.567±0.556 | 7.72E-03 |
| cg14723014 | 13 | 20436987  | GeneBody/5'UTR/1st intron | ZMYM5       | -4.382±0.388 | -4.684±0.401 | 5.29E-04 |
| cg18710692 | 13 | 20437712  | GeneBody/5'UTR/1st exon   | ZMYM5       | -4.848±0.488 | -5.473±0.754 | 1.83E-06 |
| cg26767761 | 13 | 20533755  | GeneBody/5'UTR/1st intron | ZMYM2       | -5.346±0.545 | -5.726±0.514 | 1.41E-03 |
| cg18735146 | 13 | 21140606  | TSS1500                   | IFT88       | -0.49±0.225  | -0.34±0.266  | 3.39E-03 |
| cg26790132 | 13 | 21277505  | GeneBody/5'UTR/1st exon   | IL17D       | -4.218±0.281 | -4.471±0.376 | 1.95E-04 |
| cg05395995 | 13 | 21348183  | TSS200                    | N6AMT2      | -4.745±0.533 | -5.132±0.568 | 1.17E-03 |
| cg02147791 | 13 | 21714429  | TSS1500                   | SAP18       | -2.67±0.456  | -2.042±0.684 | 4.47E-07 |
| cg25495394 | 13 | 21714725  | GeneBody/1st exon         | SAP18       | -4.899±0.422 | -5.173±0.614 | 7.05E-03 |
| cg07827038 | 13 | 21750347  | TSS200                    | MRP63       | -4.972±0.477 | -5.304±0.492 | 1.70E-03 |
| cg00432979 | 13 | 21750473  | GeneBody/5'UTR/1st exon   | MRP63       | -5.181±0.566 | -5.569±0.547 | 1.72E-03 |
| cg13557178 | 13 | 22178108  | GeneBody/1st exon         | MICU2       | -5.279±0.334 | -5.529±0.419 | 1.31E-03 |
| cg08163803 | 13 | 22178600  | TSS1500                   | MICU2       | -3.377±0.418 | -3.738±0.556 | 3.25E-04 |
| cg06150803 | 13 | 24144257  | TSS1500                   | TNFRSF19    | -1.452±0.3   | -1.63±0.307  | 6.65E-03 |
| cg07440877 | 13 | 24523079  | GeneBody/1st exon         | ANKRD20A19P | 2.924±0.24   | 3.122±0.37   | 9.82E-04 |
| cg03126490 | 13 | 24735051  | GeneBody/5'UTR/1st exon   | SPATA13     | -5.48±0.385  | -5.793±0.381 | 2.95E-04 |
| cg00448720 | 13 | 24883014  | TSS1500                   | C1QTNF9     | 0.974±0.255  | 1.176±0.337  | 8.34E-04 |
| cg09546332 | 13 | 25086777  | GeneBody/5'UTR/1st intron | PARP4       | -5.119±0.3   | -5.483±0.586 | 2.44E-05 |
| cg02943497 | 13 | 25087090  | TSS200                    | PARP4       | -3.302±0.229 | -3.521±0.342 | 1.47E-04 |
| cg17806989 | 13 | 25338287  | TSS200                    | RNF17       | 3.698±0.324  | 3.908±0.353  | 3.62E-03 |
| cg06282240 | 13 | 25497044  | TSS200                    | CENPJ       | -5.958±0.72  | -6.648±0.572 | 2.38E-05 |
| cg00094319 | 13 | 25670530  | GeneBody/1st exon         | PABPC3      | 1.772±0.255  | 1.577±0.321  | 1.09E-03 |
| cg22448677 | 13 | 26796711  | TSS1500                   | RNF6        | -5.471±0.507 | -5.806±0.575 | 3.28E-03 |
| cg13433272 | 13 | 26828068  | TSS1500                   | CDK8        | -4.508±0.378 | -4.941±0.48  | 4.83E-06 |
| cg09185773 | 13 | 27132773  | GeneBody/5'UTR/1st intron | WASF3       | -3.432±0.335 | -3.793±0.383 | 9.07E-06 |
| cg12584034 | 13 | 27825352  | TSS1500                   | RPL21       | -3.405±0.417 | -3.683±0.387 | 2.05E-03 |
| cg17904786 | 13 | 27998438  | TSS1500                   | GTF3A       | -4.402±0.335 | -4.639±0.373 | 1.66E-03 |
| cg27323780 | 13 | 28024626  | GeneBody/5'UTR/1st intron | MTIF3       | -4.776±0.436 | -5.14±0.527  | 1.23E-03 |
| cg21914262 | 13 | 28024888  | TSS200                    | MTIF3       | -4.432±0.317 | -4.65±0.296  | 1.64E-03 |
| cg00859193 | 13 | 29233011  | TSS200                    | POMP        | -4.594±0.268 | -4.927±0.424 | 3.57E-06 |
| cg25955899 | 13 | 29233493  | GeneBody/1st intron       | POMP        | -5.785±0.515 | -6.351±0.616 | 7.25E-06 |
| cg24321030 | 13 | 29292888  | GeneBody/5'UTR/1st exon   | SLC46A3     | -5.596±0.539 | -6.187±0.523 | 4.42E-06 |
| cg09121849 | 13 | 30169249  | GeneBody/5'UTR/1st intron | SLC7A1      | -5.732±0.598 | -6.296±0.547 | 3.76E-05 |
| cg14424530 | 13 | 30170129  | TSS1500                   | SLC7A1      | -4.64±0.417  | -4.938±0.388 | 1.08E-03 |
| cg22781236 | 13 | 30424171  | GeneBody/5'UTR/1st exon   | UBL3        | -5.367±0.364 | -5.795±0.534 | 5.97E-06 |
| cg11047295 | 13 | 31039916  | GeneBody/5'UTR/1st intron | HMGB1       | -5.198±0.381 | -5.415±0.331 | 7.25E-03 |
| cg09203961 | 13 | 31040215  | TSS200                    | HMGB1       | -5.974±0.607 | -6.596±0.629 | 1.45E-05 |
| cg04198824 | 13 | 31191332  | TSS1500                   | USPL1       | -4.451±0.582 | -4.804±0.516 | 4.39E-03 |
| cg24891133 | 13 | 31480335  | GeneBody/5'UTR/1st exon   | MEDAG       | -3.784±0.538 | -4.114±0.653 | 7.05E-03 |
| cg06901392 | 13 | 31736105  | GeneBody/5'UTR/1st exon   | HSPH1       | -4.669±0.363 | -5.021±0.442 | 5.13E-05 |
| cg03373442 | 13 | 31736396  | TSS1500                   | HSPH1       | -5.907±0.637 | -6.356±0.563 | 1.15E-03 |
| cg14714578 | 13 | 31774336  | GeneBody/1st intron       | B3GALT1     | -5.896±0.637 | -6.467±0.589 | 7.47E-05 |
| cg12491368 | 13 | 32523340  | GeneBody                  | EEF1DP3     | 1±0.259      | 1.159±0.311  | 6.73E-03 |
| cg16941656 | 13 | 32605611  | GeneBody/1st exon         | FRY-AS1     | -5.231±0.527 | -5.596±0.524 | 1.62E-03 |
| cg27253386 | 13 | 32889752  | GeneBody/5'UTR/1st exon   | BRCA2       | -5.848±0.515 | -6.155±0.555 | 6.93E-03 |
| cg15779381 | 13 | 33112842  | GeneBody/5'UTR/1st exon   | N4BP2L2     | -3.75±0.508  | -4.355±0.531 | 1.37E-06 |
| cg26049501 | 13 | 33860056  | TSS200                    | STARD13     | -3.038±0.564 | -3.354±0.565 | 9.96E-03 |
| cg19932177 | 13 | 34392073  | TSS200                    | RFC3        | -4.386±0.298 | -4.671±0.433 | 1.31E-04 |
| cg24254120 | 13 | 34392869  | GeneBody/1st intron       | RFC3        | -4.327±0.466 | -4.654±0.334 | 9.07E-04 |
| cg18755783 | 13 | 36919905  | TSS1500                   | SPG20OS     | -4.033±0.483 | -4.396±0.715 | 2.12E-03 |
| cg22609576 | 13 | 36920662  | TSS200                    | SPG20       | -4.893±0.478 | -5.227±0.51  | 1.69E-03 |
| cg12571423 | 13 | 37006748  | GeneBody/5'UTR/1st exon   | CCNA1       | -2.186±0.218 | -2.368±0.312 | 6.18E-04 |
| cg00290028 | 13 | 37393125  | TSS1500                   | RFXAP       | -5.123±0.302 | -5.374±0.349 | 3.39E-04 |
| cg15318532 | 13 | 37393521  | GeneBody/1st exon         | RFXAP       | -5.899±0.554 | -6.298±0.543 | 1.08E-03 |
| cg27508002 | 13 | 37454023  | GeneBody/5'UTR/1st intron | SMAD9       | 1.142±0.231  | 0.964±0.289  | 9.87E-04 |
| cg01999787 | 13 | 37573656  | TSS200                    | ALG5        | -4.324±0.486 | -4.625±0.552 | 5.75E-03 |
| cg19337295 | 13 | 37633341  | GeneBody/5'UTR/1st exon   | SUPT20H     | -4.532±0.353 | -4.836±0.427 | 2.52E-04 |
| cg25306170 | 13 | 37680502  | TSS1500                   | CSNK1A1L    | 2.723±0.17   | 2.833±0.174  | 3.12E-03 |
| cg21721865 | 13 | 38923576  | TSS1500                   | UFM1        | -5.286±0.579 | -5.759±0.491 | 2.08E-04 |
| cg07243519 | 13 | 38924018  | GeneBody/5'UTR/1st exon   | UFM1        | -5.089±0.488 | -5.418±0.43  | 1.70E-03 |
| cg22950347 | 13 | 39611764  | GeneBody/5'UTR/1st exon   | PROSER1     | -5.373±0.484 | -5.848±0.432 | 2.01E-05 |
| cg21284880 | 13 | 40177740  | TSS1500                   | LHFP        | -4.794±0.478 | -5.285±0.553 | 1.89E-05 |
| cg21142158 | 13 | 40229689  | TSS200                    | COG6        | -3.444±0.29  | -3.631±0.271 | 2.83E-03 |
| cg15600342 | 13 | 41635509  | TSS200                    | WBP4        | -4.35±0.338  | -4.635±0.427 | 3.53E-04 |
| cg24219962 | 13 | 41635860  | GeneBody/1st intron       | WBP4        | -5.214±0.413 | -5.584±0.378 | 7.44E-05 |
| cg06146910 | 13 | 41706728  | GeneBody/5'UTR/1st exon   | KBTBD6      | -5.561±0.463 | -5.881±0.655 | 3.83E-03 |
| cg09712527 | 13 | 41768489  | GeneBody/5'UTR/1st exon   | KBTBD7      | -5.922±0.481 | -6.326±0.543 | 2.75E-04 |
| cg05895453 | 13 | 41768968  | TSS1500                   | KBTBD7      | -0.605±0.27  | -0.447±0.29  | 8.28E-03 |
| cg02178898 | 13 | 41837525  | GeneBody/5'UTR/1st intron | MTRF1       | -3.293±0.429 | -3.73±0.574  | 3.68E-05 |
| cg22691736 | 13 | 41837995  | TSS1500                   | MTRF1       | -3.81±0.634  | -4.18±0.613  | 6.85E-03 |
| cg20458981 | 13 | 41885231  | TSS200                    | NAA16       | -4.112±0.413 | -4.528±0.447 | 2.10E-05 |
| cg17921034 | 13 | 42846375  | GeneBody/5'UTR/1st intron | AKAP11      | -4.459±0.459 | -4.787±0.54  | 1.72E-03 |
| cg24222324 | 13 | 43145414  | GeneBody/5'UTR            | TNFSF11     | 2.45±0.202   | 2.59±0.213   | 1.75E-03 |
| cg22905097 | 13 | 43566401  | GeneBody/5'UTR/1st exon   | EPSTI1      | -5.137±0.538 | -5.577±0.452 | 2.05E-04 |
| cg26197220 | 13 | 45150229  | GeneBody/1st exon         | TSC22D1-AS1 | -5.724±0.667 | -6.469±0.663 | 3.53E-06 |
| cg10872447 | 13 | 45694593  | TSS200                    | GTF2F2      | -5.381±0.397 | -5.751±0.593 | 2.00E-04 |
| cg02296128 | 13 | 45694882  | GeneBody/1st intron       | GTF2F2      | -5.392±0.306 | -5.392±0.329 | 7.11E-04 |
| cg19185384 | 13 | 45914939  | GeneBody/1st intron       | TPT1        | -5.921±0.609 | -6.359±0.627 | 1.19E-03 |
| cg27489994 | 13 | 45915937  | GeneBody/1st intron       | TPT1-AS1    | -3.414±0.371 | -3.752±0.588 | 3.58E-04 |
| cg27523951 | 13 | 46038867  | TSS200                    | COG3        | -4.665±0.511 | -5.055±0.531 | 6.67E-04 |
| cg15201599 | 13 | 46039584  | GeneBody/1st intron       | COG3        | -4.527±0.306 | -4.723±0.288 | 2.95E-03 |
| cg08608800 | 13 | 46626937  | TSS200                    | ZC3H13      | -5.192±0.503 | -5.523±0.401 | 1.93E-03 |
| cg11473104 | 13 | 48611615  | TSS200                    | NUDT15      | -0.836±0.153 | -0.598±0.264 | 1.05E-07 |
| cg12906740 | 13 | 48612050  | GeneBody/1st intron       | NUDT15      | -4.919±0.254 | -5.112±0.379 | 1.93E-03 |
| cg19764399 | 13 | 48669116  | GeneBody/5'UTR/1st intron | MED4        | -5.097±0.785 | -5.852±0.744 | 3.06E-05 |

|             |    |           |                           |           |              |              |          |
|-------------|----|-----------|---------------------------|-----------|--------------|--------------|----------|
| cg04217178  | 13 | 48807122  | TSS200                    | ITM2B     | -5.302±0.295 | -5.63±0.304  | 3.92E-06 |
| cg02632166  | 13 | 48807510  | GeneBody/1st exon         | ITM2B     | -4.923±0.327 | -5.145±0.493 | 5.45E-03 |
| cg08383063  | 13 | 48877434  | GeneBody/1st exon         | LINC00441 | -4.483±0.268 | -4.675±0.295 | 1.50E-03 |
| cg01738359  | 13 | 48878639  | GeneBody/1st intron       | RB1       | -4.402±0.195 | -4.512±0.196 | 8.68E-03 |
| cg19447496  | 13 | 48891072  | GeneBody                  | RB1       | 3.466±0.375  | 3.265±0.295  | 9.99E-03 |
| cg27182551  | 13 | 48892551  | GeneBody                  | RB1       | 1.988±0.286  | 2.195±0.394  | 2.37E-03 |
| cg18481241  | 13 | 48893727  | GeneBody                  | RB1       | 1.418±0.227  | 1.611±0.305  | 4.06E-04 |
| cg25002911  | 13 | 49039986  | GeneBody                  | RB1       | 1.662±0.178  | 1.878±0.231  | 2.04E-06 |
| cg02655204  | 13 | 49040050  | GeneBody                  | RB1       | 0.976±0.131  | 1.126±0.176  | 5.99E-06 |
| cg18236297  | 13 | 49280407  | TSS1500                   | CYSLTR2   | 1.664±0.412  | 1.152±0.59   | 2.02E-06 |
| cg27009631  | 13 | 49551038  | GeneBody/5'UTR/1st exon   | FNDC3A    | -5.517±0.485 | -5.855±0.625 | 2.82E-03 |
| cg18112431  | 13 | 49821843  | TSS1500                   | CDADC1    | -4.71±0.266  | -4.975±0.282 | 2.29E-05 |
| cg18587973  | 13 | 49822535  | GeneBody/1st intron       | CDADC1    | -3.991±0.268 | -4.19±0.32   | 1.26E-03 |
| cg07000831  | 13 | 50018514  | GeneBody/5'UTR/1st exon   | SETDB2    | -4.989±0.443 | -5.301±0.445 | 1.42E-03 |
| cg15609273  | 13 | 50159867  | TSS200                    | RCBTB1    | -4.513±0.358 | -4.804±0.519 | 8.97E-04 |
| cg03274654  | 13 | 50367395  | TSS1500                   | KPNA3     | -4.77±0.416  | -5.042±0.344 | 2.07E-03 |
| cg05337966  | 13 | 50510151  | GeneBody/1st intron       | SPRYD7    | -5.981±0.588 | -6.445±0.632 | 4.94E-04 |
| cg09276355  | 13 | 50510822  | TSS200                    | SPRYD7    | -5.031±0.406 | -5.405±0.576 | 1.80E-04 |
| cg22825979  | 13 | 50571203  | GeneBody/5'UTR/1st exon   | TRIM13    | -4.607±0.59  | -4.96±0.603  | 6.25E-03 |
| cg27533013  | 13 | 50588057  | TSS1500                   | KCNRG     | 1.762±0.259  | 1.462±0.359  | 5.59E-06 |
| cg19307060  | 13 | 50746150  | TSS200                    | ST13P4    | 2.736±0.256  | 2.918±0.285  | 1.63E-03 |
| cg10029411  | 13 | 50746245  | GeneBody/1st exon         | ST13P4    | 0.41±0.275   | 0.211±0.278  | 1.07E-03 |
| cg26847093  | 13 | 51483765  | TSS200                    | RNASEH2B  | -4.627±0.482 | -4.96±0.494  | 1.77E-03 |
| cg07818646  | 13 | 51483769  | TSS200                    | RNASEH2B  | -5.61±0.665  | -6.32±0.669  | 7.20E-06 |
| cg04206644  | 13 | 52026632  | GeneBody/1st exon         | INTS6     | -4.867±0.494 | -5.409±0.609 | 8.47E-06 |
| cg05508048  | 13 | 52027321  | TSS200                    | INTS6     | -4.62±0.29   | -5.049±0.406 | 7.25E-08 |
| cg00888561  | 13 | 52157190  | TSS1500                   | WDFY2     | -4.31±0.305  | -4.51±0.339  | 3.41E-03 |
| cg00671161  | 13 | 52586367  | TSS200                    | ALG11     | -5.964±0.55  | -6.365±0.57  | 1.07E-03 |
| cg19524009  | 13 | 52735075  | TSS1500                   | NEK3      | 1.762±0.299  | 2.003±0.252  | 2.44E-04 |
| cg16114640  | 13 | 52980000  | GeneBody/5'UTR/1st intron | THSD1     | -3.351±0.489 | -3.862±0.619 | 1.95E-05 |
| cg09174741  | 13 | 52981577  | TSS1500                   | THSD1     | 2.538±0.241  | 2.831±0.477  | 3.03E-05 |
| cg02543879  | 13 | 53024717  | GeneBody/1st exon         | VPS36     | -4.564±0.34  | -4.851±0.605 | 1.47E-03 |
| cg17164340  | 13 | 53025003  | TSS1500                   | VPS36     | -4.352±0.23  | -4.56±0.262  | 1.12E-04 |
| cg10218426  | 13 | 53029438  | TSS200                    | CKAP2     | -5.245±0.359 | -5.508±0.339 | 8.55E-04 |
| cg11298616  | 13 | 53029954  | GeneBody/1st intron       | CKAP2     | -4.433±0.345 | -4.675±0.522 | 4.39E-03 |
| cg03996465  | 13 | 53226743  | TSS200                    | SUGT1     | -4.711±0.37  | -5.004±0.512 | 1.02E-03 |
| cg15182360  | 13 | 61989737  | TSS200                    | PCDH20    | -3.736±0.332 | -4.029±0.421 | 2.12E-04 |
| cg02407785  | 13 | 67804285  | GeneBody/5'UTR/1st exon   | PCDH9     | -4.827±0.396 | -5.313±0.517 | 1.75E-06 |
| cg04171565  | 13 | 73302130  | GeneBody/5'UTR/1st exon   | BORA      | -4.369±0.424 | -4.829±0.572 | 1.46E-05 |
| cg02162950  | 13 | 73355953  | TSS1500                   | PIBF1     | -4.685±0.416 | -5.12±0.629  | 4.51E-05 |
| cg12930920  | 13 | 73356356  | TSS200                    | DIS3      | -4.229±0.326 | -4.45±0.459  | 4.62E-03 |
| cg09667226  | 13 | 73632762  | TSS1500                   | KLF5      | -4.519±0.287 | -4.937±0.436 | 1.35E-07 |
| cg12848131  | 13 | 73633312  | GeneBody/5'UTR/1st exon   | KLF5      | -5.572±0.458 | -5.903±0.477 | 1.14E-03 |
| cg071113600 | 13 | 74708194  | TSS200                    | KLF12     | -5.268±0.54  | -5.642±0.501 | 1.48E-03 |
| cg16257685  | 13 | 76124267  | GeneBody                  | UCHL3     | -5.16±0.58   | -5.596±0.499 | 5.67E-04 |
| cg08697285  | 13 | 77901013  | GeneBody/5'UTR/1st exon   | MYCBP2    | -3.591±0.191 | -3.361±0.265 | 2.93E-06 |
| cg03999420  | 13 | 77901358  | TSS200                    | MYCBP2    | -4.759±0.286 | -5.03±0.303  | 4.86E-05 |
| cg21063899  | 13 | 78109801  | TSS200                    | SCEL      | -0.271±0.459 | -0.836±0.617 | 1.79E-06 |
| cg03086857  | 13 | 78492568  | GeneBody/1st exon         | EDNRB     | -2.769±0.317 | -3.038±0.523 | 9.44E-04 |
| cg24745738  | 13 | 78493958  | TSS200                    | EDNRB     | -2.725±0.34  | -2.468±0.478 | 1.69E-03 |
| cg08097882  | 13 | 79177516  | GeneBody/5'UTR/1st exon   | POU4F1    | -3.752±0.329 | -4.013±0.538 | 1.87E-03 |
| cg21306212  | 13 | 79979929  | TSS200                    | RBM26     | -3.635±0.213 | -3.827±0.312 | 2.88E-04 |
| cg25139619  | 13 | 91999408  | TSS1500                   | MIR17HG   | -5.074±0.464 | -5.457±0.568 | 4.22E-04 |
| cg09896445  | 13 | 92050789  | TSS200                    | GPC5      | -4.83±0.594  | -5.232±0.54  | 1.75E-03 |
| cg23246978  | 13 | 93879042  | TSS200                    | GPC6      | -4.083±0.567 | -4.499±0.541 | 8.58E-04 |
| cg23922914  | 13 | 95248439  | GeneBody/5'UTR/1st exon   | TGDS      | -5.393±0.486 | -5.87±0.476  | 2.38E-05 |
| cg06255524  | 13 | 96328888  | TSS1500                   | DNAJC3    | -4.815±0.545 | -5.297±0.495 | 8.75E-05 |
| cg08797194  | 13 | 96705123  | GeneBody/1st intron       | UGGT2     | -3.415±0.557 | -3.907±0.689 | 1.88E-04 |
| cg25169784  | 13 | 96706045  | TSS1500                   | UGGT2     | -4.127±0.317 | -4.366±0.417 | 1.43E-03 |
| cg17183991  | 13 | 96743170  | GeneBody/1st exon         | HS6ST3    | -3.914±0.463 | -4.244±0.553 | 1.86E-03 |
| cg02838877  | 13 | 97873877  | TSS1500                   | MBNL2     | -0.46±0.227  | -0.235±0.345 | 9.59E-05 |
| cg25329939  | 13 | 98085947  | TSS1500                   | RAP2A     | -4.619±0.276 | -4.886±0.287 | 3.61E-05 |
| cg06111305  | 13 | 98086784  | GeneBody/1st exon         | RAP2A     | -4.818±0.407 | -5.197±0.555 | 1.39E-04 |
| cg01679262  | 13 | 98606196  | GeneBody/5'UTR/1st intron | IPO5      | -1.011±0.233 | -1.307±0.384 | 3.16E-06 |
| cg02246968  | 13 | 99852859  | GeneBody/1st intron       | UBAC2-AS1 | -5.17±0.47   | -5.53±0.405  | 4.69E-04 |
| cg02213716  | 13 | 99853497  | GeneBody/5'UTR/1st exon   | UBAC2     | -4.738±0.344 | -5.084±0.419 | 3.03E-05 |
| cg20865068  | 13 | 100153453 | TSS200                    | TM9SF2    | -5.056±0.637 | -5.518±0.548 | 8.17E-04 |
| cg23446109  | 13 | 100740987 | TSS1500                   | PCCA      | -4.149±0.48  | -4.59±0.527  | 7.97E-05 |
| cg02154956  | 13 | 100741410 | GeneBody/1st exon         | PCCA      | -5.889±0.623 | -6.274±0.585 | 4.12E-03 |
| cg16208448  | 13 | 103249991 | GeneBody/1st intron       | TPP2      | -2.635±0.635 | -3.189±0.659 | 1.39E-04 |
| cg06880557  | 13 | 103425546 | GeneBody/5'UTR/1st intron | TEX30     | -4.65±0.337  | -5.107±0.492 | 5.19E-07 |
| cg22767079  | 13 | 103451338 | TSS200                    | BIVM      | -4.838±0.37  | -5.237±0.516 | 1.81E-05 |
| cg18247638  | 13 | 103451366 | TSS200                    | BIVM      | -4.538±0.228 | -4.945±0.418 | 8.50E-09 |
| cg08602689  | 13 | 103452535 | TSS1500                   | KDELC1    | -4.717±0.42  | -5.016±0.502 | 1.87E-03 |
| cg07177755  | 13 | 103498027 | TSS200                    | ERCC5     | -4.986±0.417 | -5.439±0.557 | 1.31E-05 |
| cg13057891  | 13 | 103498411 | GeneBody/5'UTR/1st exon   | ERCC5     | -5.121±0.479 | -5.493±0.568 | 7.68E-04 |
| cg24929737  | 13 | 107188614 | TSS1500                   | EFNB2     | -5.146±0.356 | -5.382±0.444 | 4.02E-03 |
| cg08216792  | 13 | 108868060 | TSS200                    | LIG4      | -4.326±0.275 | -4.748±0.496 | 1.68E-07 |
| cg12736438  | 13 | 111214457 | TSS1500                   | RAB20     | -4.66±0.532  | -5.131±0.546 | 1.07E-04 |
| cg15270851  | 13 | 111358291 | GeneBody/1st exon         | CARS2     | -4.032±0.27  | -4.226±0.389 | 3.00E-03 |
| cg26272237  | 13 | 111358862 | TSS1500                   | CARS2     | -5.32±0.357  | -5.601±0.499 | 1.09E-03 |
| cg14405589  | 13 | 113242289 | GeneBody/1st exon         | TUBGCP3   | -5.821±0.629 | -6.302±0.51  | 4.20E-04 |
| cg12722998  | 13 | 113862943 | GeneBody/5'UTR/1st exon   | PCID2     | -4.291±0.428 | -4.589±0.367 | 1.24E-03 |
| cg18540305  | 13 | 114145361 | GeneBody/5'UTR/1st exon   | TMCO3     | -5.931±0.444 | -6.387±0.683 | 6.17E-05 |
| cg09034896  | 13 | 114321466 | TSS200                    | GRK1      | 0.39±0.185   | 0.505±0.222  | 6.14E-03 |
| cg25920951  | 13 | 114462472 | GeneBody/1st intron       | TMEM255B  | -4.915±0.375 | -5.246±0.487 | 2.24E-04 |
| cg10893437  | 13 | 115079492 | TSS1500                   | CHAMP1    | -3.39±0.278  | -3.641±0.263 | 7.26E-05 |
| cg13176285  | 13 | 115080469 | GeneBody/5'UTR/1st intron | CHAMP1    | -4.747±0.682 | -5.352±0.581 | 7.40E-05 |
| cg11474075  | 14 | 20773935  | GeneBody/1st intron       | TTC5      | -4.836±0.396 | -5.18±0.415  | 1.48E-04 |
| cg20483016  | 14 | 20774219  | TSS200                    | TTC5      | -3.47±0.254  | -3.686±0.308 | 2.95E-04 |
| cg24595957  | 14 | 20811627  | TSS200                    | RPPH1     | -4.852±0.482 | -5.295±0.528 | 7.88E-05 |
| cg15078479  | 14 | 20811808  | GeneBody/1st exon         | PARP2     | -5.912±0.604 | -6.261±0.578 | 7.22E-03 |
| cg15035713  | 14 | 20881570  | GeneBody/5'UTR/1st exon   | TEP1      | -4.56±0.334  | -4.973±0.554 | 5.33E-06 |
| cg22438324  | 14 | 20922915  | GeneBody/5'UTR/1st exon   | OSGEP     | -5.643±0.444 | -5.974±0.489 | 9.96E-04 |
| cg21337430  | 14 | 20923471  | GeneBody/5'UTR/1st exon   | APEX1     | -4.346±0.207 | -4.689±0.368 | 2.81E-08 |

|             |    |          |                           |             |              |              |          |
|-------------|----|----------|---------------------------|-------------|--------------|--------------|----------|
| cg14353162  | 14 | 20929766 | TSS200                    | TMEM55B     | -4.437±0.373 | -4.73±0.552  | 1.42E-03 |
| cg20639263  | 14 | 20937872 | GeneBody/1st intron       | PNP         | -4.765±0.519 | -5.062±0.514 | 8.22E-03 |
| cg000012199 | 14 | 21151024 | TSS1500                   | ANG         | -5.845±0.551 | -6.25±0.58   | 1.00E-03 |
| cg25327013  | 14 | 21151223 | TSS1500                   | ANG         | -3.887±0.47  | -4.211±0.445 | 1.55E-03 |
| cg22723026  | 14 | 21152452 | GeneBody/5'UTR/1st exon   | RNASE4      | -5.251±0.481 | -5.622±0.487 | 5.50E-04 |
| cg09044738  | 14 | 21214682 | GeneBody/5'UTR/1st intron | EDDM3A      | 2.51±0.213   | 2.664±0.249  | 1.61E-03 |
| cg02113971  | 14 | 21457816 | TSS200                    | METTL17     | -4.244±0.463 | -4.547±0.419 | 2.31E-03 |
| cg15427567  | 14 | 21458055 | GeneBody/5'UTR/1st exon   | METTL17     | -4.751±0.418 | -5.121±0.412 | 1.03E-04 |
| cg16101572  | 14 | 21566698 | GeneBody/5'UTR/1st exon   | ZNF219      | -4.86±0.454  | -5.24±0.514  | 2.95E-04 |
| cg09648228  | 14 | 21737169 | GeneBody/5'UTR/1st intron | HNRNPC      | -4.582±0.36  | -4.817±0.52  | 6.72E-03 |
| cg18079631  | 14 | 21737765 | TSS200                    | HNRNPC      | -4.385±0.407 | -4.751±0.486 | 1.39E-04 |
| cg18801292  | 14 | 21852650 | TSS1500                   | SUPT16H     | -5.614±0.512 | -6.019±0.422 | 2.91E-04 |
| cg00657582  | 14 | 21904906 | GeneBody/5'UTR/1st intron | CHD8        | -3.516±0.384 | -3.74±0.399  | 7.66E-03 |
| cg02806093  | 14 | 21944967 | TSS200                    | RAB2B       | -4.641±0.537 | -5.113±0.601 | 1.50E-04 |
| cg11053740  | 14 | 21945175 | TSS200                    | RAB2B       | -4.127±0.434 | -4.526±0.628 | 2.05E-04 |
| cg27348440  | 14 | 22090709 | 0                         | 0           | 2.026±0.234  | 1.867±0.248  | 2.14E-03 |
| cg13386234  | 14 | 23058032 | GeneBody/1st exon         | DAD1        | -5.362±0.404 | -5.635±0.415 | 2.22E-03 |
| cg10145369  | 14 | 23058288 | TSS200                    | DAD1        | -5.975±0.455 | -6.366±0.484 | 1.77E-04 |
| cg26394737  | 14 | 23067081 | TSS200                    | ABHD4       | -4.258±0.318 | -4.548±0.296 | 5.90E-05 |
| cg13222081  | 14 | 23298926 | TSS200                    | MRPL52      | -3.675±0.517 | -4.056±0.506 | 8.50E-04 |
| cg00197641  | 14 | 23299461 | GeneBody/5'UTR            | MRPL52      | -4.329±0.266 | -4.531±0.277 | 7.23E-04 |
| cg04884122  | 14 | 23504085 | GeneBody/1st exon         | PSMB5       | -4.734±0.404 | -5.145±0.472 | 2.33E-05 |
| cg24857117  | 14 | 23504316 | GeneBody/5'UTR/1st exon   | PSMB5       | -3.679±0.383 | -3.959±0.612 | 3.66E-03 |
| cg25803423  | 14 | 23563820 | TSS1500                   | C14orf119   | -3.889±0.348 | -4.228±0.504 | 9.83E-05 |
| cg02039171  | 14 | 23588162 | GeneBody/1st exon         | CEBPE       | 1.62±0.223   | 1.796±0.264  | 6.22E-04 |
| cg27035169  | 14 | 23653098 | TSS1500                   | SLC7A8      | -1.551±0.372 | -1.77±0.448  | 9.54E-03 |
| cg11095315  | 14 | 23789003 | TSS1500                   | PABPN1      | 2.359±0.212  | 2.508±0.222  | 1.55E-03 |
| cg14366598  | 14 | 23841754 | TSS1500                   | IL25        | -0.238±0.206 | -0.362±0.234 | 7.30E-03 |
| cg14541311  | 14 | 23877130 | GeneBody/5'UTR/1st intron | MYH6        | 1.149±0.24   | 1.343±0.237  | 3.25E-04 |
| cg24555600  | 14 | 24422956 | TSS200                    | DHRS4       | -4.372±0.535 | -4.716±0.725 | 6.42E-03 |
| cg12062492  | 14 | 24423140 | GeneBody/1st intron       | DHRS4       | -1.87±0.246  | -2.029±0.326 | 5.77E-03 |
| cg20812929  | 14 | 24458345 | GeneBody/1st intron       | DHRS4L2     | -1.045±0.294 | -1.229±0.429 | 9.96E-03 |
| cg26071823  | 14 | 24583182 | TSS1500                   | DCAF11      | -4.145±0.215 | -4.338±0.233 | 1.06E-04 |
| cg23602684  | 14 | 24584099 | GeneBody/5'UTR/1st exon   | DCAF11      | -6.066±0.574 | -6.416±0.551 | 4.76E-03 |
| cg25487438  | 14 | 24584340 | TSS200                    | DCAF11      | -4.254±0.479 | -4.567±0.489 | 2.95E-03 |
| cg07602026  | 14 | 24605550 | GeneBody/1st intron       | PSME1       | -4.624±0.385 | -4.994±0.605 | 1.69E-04 |
| cg05874478  | 14 | 24615768 | GeneBody/1st exon         | PSME2       | -2.104±0.305 | -1.918±0.341 | 6.08E-03 |
| cg23381116  | 14 | 24616413 | TSS1500                   | RNF31       | -5.533±0.567 | -5.866±0.531 | 6.19E-03 |
| cg11065693  | 14 | 24630380 | TSS200                    | IRF9        | -4.796±0.368 | -5.029±0.376 | 3.88E-03 |
| cg05366401  | 14 | 24664722 | GeneBody/5'UTR/1st exon   | TM9SF1      | -5.811±0.563 | -6.349±0.576 | 3.93E-05 |
| cg13834500  | 14 | 24665445 | TSS1500                   | TM9SF1      | -4.657±0.271 | -4.877±0.318 | 4.44E-04 |
| cg16769376  | 14 | 24685222 | GeneBody/5'UTR/1st exon   | MDP1        | -5.075±0.379 | -5.512±0.398 | 2.38E-06 |
| cg24685926  | 14 | 24685281 | TSS200                    | MDP1        | -4.167±0.346 | -4.471±0.457 | 2.57E-04 |
| cg25055403  | 14 | 24701388 | GeneBody/1st intron       | NEDD8-MDP1  | -4.55±0.378  | -4.881±0.544 | 3.78E-04 |
| cg17391929  | 14 | 24702094 | TSS200                    | GMPR2       | -3.492±0.392 | -3.716±0.341 | 7.09E-03 |
| cg17109273  | 14 | 24712029 | TSS200                    | TINF2       | -5.51±0.574  | -5.966±0.773 | 8.97E-04 |
| cg14587868  | 14 | 24732737 | TSS1500                   | TGM1        | 0.82±0.167   | 0.956±0.194  | 4.32E-04 |
| cg18978324  | 14 | 24740937 | TSS200                    | RABGGTA     | -5.153±0.446 | -5.633±0.547 | 1.10E-05 |
| cg10337819  | 14 | 24778279 | TSS1500                   | LTB4R2      | 2.68±0.158   | 2.768±0.151  | 9.59E-03 |
| cg16761581  | 14 | 24803807 | GeneBody                  | ADCY4       | -3.922±0.331 | -4.14±0.541  | 9.34E-03 |
| cg08766149  | 14 | 25103301 | GeneBody/1st intron       | GZMB        | 2.017±0.211  | 2.219±0.325  | 1.58E-04 |
| cg05637892  | 14 | 31091672 | GeneBody/5'UTR/1st intron | SCFD1       | -4.426±0.242 | -4.58±0.223  | 3.15E-03 |
| cg01546046  | 14 | 31494849 | GeneBody/5'UTR/1st exon   | AP4S1       | -1.45±0.23   | -1.643±0.289 | 3.66E-04 |
| cg13382714  | 14 | 31495002 | GeneBody/5'UTR/1st intron | AP4S1       | -4.997±0.414 | -5.23±0.325  | 7.19E-03 |
| cg09539408  | 14 | 31495940 | GeneBody/5'UTR/1st exon   | AP4S1       | -4.635±0.329 | -4.851±0.434 | 4.94E-03 |
| cg00832517  | 14 | 31926792 | TSS200                    | DTD2        | -4.188±0.558 | -4.527±0.576 | 5.70E-03 |
| cg20550520  | 14 | 32545277 | GeneBody/1st exon         | ARHGAP5-AS1 | -3.435±0.52  | -3.739±0.389 | 5.06E-03 |
| cg07948245  | 14 | 32546939 | GeneBody/5'UTR/1st intron | ARHGAP5     | -5.38±0.546  | -5.839±0.608 | 2.63E-04 |
| cg11991859  | 14 | 33408527 | GeneBody/1st exon         | NPAS3       | -4.852±0.387 | -5.096±0.452 | 5.17E-03 |
| cg05769169  | 14 | 34419832 | GeneBody/1st exon         | EGLN3       | -4.009±0.514 | -4.314±0.526 | 6.59E-03 |
| cg21379309  | 14 | 34931822 | TSS1500                   | SPTSSA      | -5.318±0.545 | -5.834±0.516 | 3.79E-05 |
| cg24276491  | 14 | 35009492 | TSS1500                   | EAPP        | 1.402±0.219  | 1.562±0.265  | 1.57E-03 |
| cg26949796  | 14 | 35183363 | TSS1500                   | CFL2        | -4.317±0.37  | -4.557±0.482 | 5.52E-03 |
| cg25096582  | 14 | 35183928 | GeneBody/1st exon         | CFL2        | -5.043±0.381 | -5.398±0.652 | 4.09E-04 |
| cg18383160  | 14 | 35515291 | TSS1500                   | FAM177A1    | -4.689±0.581 | -5.146±0.528 | 3.65E-04 |
| cg22624926  | 14 | 35761401 | TSS200                    | PSMA6       | -4.702±0.561 | -5.185±0.523 | 1.28E-04 |
| cg08039281  | 14 | 35761689 | GeneBody/1st exon         | PSMA6       | -3.919±0.261 | -4.229±0.478 | 1.96E-05 |
| cg05852416  | 14 | 35874177 | TSS1500                   | NFKBIA      | -5.405±0.505 | -5.79±0.483  | 5.66E-04 |
| cg11847459  | 14 | 36789488 | GeneBody/1st intron       | MBIP        | -5.642±0.411 | -5.955±0.377 | 5.45E-04 |
| cg12220493  | 14 | 36990144 | TSS1500                   | NKX2-1      | -3.409±0.347 | -3.691±0.539 | 1.19E-03 |
| cg26620157  | 14 | 37130297 | GeneBody/5'UTR/1st intron | PAX9        | -1.89±0.332  | -2.112±0.407 | 3.63E-03 |
| cg18089145  | 14 | 39572493 | TSS200                    | SEC23A      | -4.449±0.255 | -4.722±0.31  | 1.20E-05 |
| cg15300989  | 14 | 39583430 | TSS200                    | GEMIN2      | -4.875±0.412 | -5.214±0.413 | 2.57E-04 |
| cg23521069  | 14 | 39583513 | GeneBody/1st exon         | GEMIN2      | -5.141±0.6   | -5.679±0.676 | 1.19E-04 |
| cg04585992  | 14 | 39639574 | GeneBody/5'UTR/1st exon   | TRAPPC6B    | -4.337±0.269 | -4.649±0.415 | 9.66E-06 |
| cg01078871  | 14 | 39901508 | GeneBody/5'UTR/1st exon   | FBXO33      | -3.923±0.361 | -3.488±0.487 | 2.61E-06 |
| cg21600563  | 14 | 39901846 | TSS200                    | FBXO33      | -5.481±0.395 | -6.019±0.704 | 1.58E-06 |
| cg22903365  | 14 | 45431297 | TSS200                    | FAM179B     | -5.093±0.406 | -5.339±0.4   | 5.19E-03 |
| cg12503243  | 14 | 45553114 | TSS200                    | PRPF39      | -3.019±0.617 | -3.579±0.617 | 7.49E-05 |
| cg23104823  | 14 | 45553408 | GeneBody/5'UTR/1st exon   | PRPF39      | -3.902±0.216 | -4.106±0.338 | 2.04E-04 |
| cg03491181  | 14 | 45605002 | TSS200                    | FANCM       | -4.41±0.579  | -4.908±0.592 | 1.53E-04 |
| cg15937081  | 14 | 45722043 | GeneBody/5'UTR/1st intron | MIS18BP1    | -3.761±0.448 | -4.197±0.588 | 6.39E-05 |
| cg04166304  | 14 | 45722617 | TSS200                    | MIS18BP1    | -5.138±0.365 | -5.682±0.512 | 6.02E-08 |
| cg02443089  | 14 | 50052765 | GeneBody                  | RPS29       | -3.719±0.422 | -4.019±0.574 | 2.75E-03 |
| cg13892015  | 14 | 50065056 | TSS1500                   | LRR1        | -4.056±0.558 | -4.404±0.515 | 3.70E-03 |
| cg11328875  | 14 | 50066018 | GeneBody/1st intron       | LRR1        | -5.227±0.54  | -5.665±0.553 | 3.32E-04 |
| cg07184439  | 14 | 50087799 | GeneBody/5'UTR/1st exon   | MGAT2       | -4.738±0.398 | -5.047±0.506 | 9.59E-04 |
| cg14727399  | 14 | 50101089 | GeneBody/1st exon         | DNAAF2      | -5.577±0.551 | -5.973±0.413 | 7.38E-04 |
| cg15365950  | 14 | 50160307 | GeneBody/1st intron       | KLHDC1      | -5.261±0.396 | -5.594±0.39  | 1.94E-04 |
| cg19584823  | 14 | 50235219 | GeneBody/1st exon         | KLHDC2      | -4.406±0.395 | -4.716±0.503 | 8.20E-04 |
| cg06956646  | 14 | 50698982 | TSS1500                   | SOS2        | -4.788±0.412 | -5.267±0.606 | 7.36E-06 |
| cg15996947  | 14 | 50780115 | GeneBody/1st intron       | ATP5S       | 1.92±0.205   | 2.073±0.272  | 1.57E-03 |
| cg12867068  | 14 | 50863241 | TSS1500                   | CDKL1       | -4.969±0.491 | -5.318±0.62  | 2.21E-03 |
| cg18440188  | 14 | 50999316 | GeneBody/5'UTR/1st exon   | MAP4K5      | -4.927±0.372 | -5.314±0.547 | 4.06E-05 |
| cg06832950  | 14 | 51025891 | TSS1500                   | ATL1        | 2.927±0.187  | 3.035±0.192  | 7.55E-03 |

|            |    |          |                           |               |              |              |          |
|------------|----|----------|---------------------------|---------------|--------------|--------------|----------|
| cg18125479 | 14 | 51411049 | GeneBody/1st exon         | PYGL          | -4.284±0.257 | -4.565±0.496 | 1.08E-04 |
| cg03361068 | 14 | 51561562 | GeneBody/1st exon         | TRIM9         | -4.589±0.388 | -4.841±0.397 | 3.17E-03 |
| cg17347389 | 14 | 51562646 | TSS1500                   | TRIM9         | -4.254±0.332 | -4.526±0.488 | 8.32E-04 |
| cg12830829 | 14 | 51707081 | GeneBody/1st exon         | TMX1          | -4.998±0.311 | -5.214±0.307 | 1.58E-03 |
| cg20284440 | 14 | 52118688 | GeneBody/5'UTR/1st exon   | FRMD6         | -4.93±0.369  | -5.363±0.548 | 6.42E-06 |
| cg01231779 | 14 | 52535887 | GeneBody/5'UTR/1st exon   | NID2          | -3.93±0.322  | -4.175±0.429 | 1.36E-03 |
| cg05837075 | 14 | 53162160 | GeneBody/1st exon         | ERO1L         | -5.206±0.402 | -5.462±0.42  | 3.80E-03 |
| cg08554114 | 14 | 53163204 | TSS1500                   | ERO1L         | 1.403±0.215  | 1.593±0.23   | 1.26E-04 |
| cg01254459 | 14 | 53173891 | TSS200                    | PSMC6         | -5.038±0.445 | -5.367±0.488 | 1.05E-03 |
| cg26979012 | 14 | 53174064 | GeneBody/1st intron       | PSMC6         | -5.556±0.506 | -5.9±0.57    | 2.52E-03 |
| cg17091770 | 14 | 53197072 | GeneBody/5'UTR/1st intron | STYX          | -4.818±0.571 | -5.38±0.621  | 3.03E-05 |
| cg12227762 | 14 | 53257947 | GeneBody/5'UTR/1st intron | GNPNAT1       | -5.037±0.488 | -5.414±0.494 | 5.43E-04 |
| cg11715903 | 14 | 53417327 | GeneBody/5'UTR/1st intron | FERMT2        | -5.898±0.613 | -6.33±0.679  | 1.71E-03 |
| cg14310034 | 14 | 54423433 | GeneBody/5'UTR/1st exon   | BMP4          | -4.163±0.483 | -4.479±0.472 | 2.74E-03 |
| cg02626977 | 14 | 54863550 | TSS200                    | CDKN3         | -5.466±0.666 | -5.883±0.624 | 3.77E-03 |
| cg03724882 | 14 | 54864244 | GeneBody/1st intron       | CDKN3         | -3.215±0.316 | -3.405±0.372 | 7.84E-03 |
| cg27144162 | 14 | 54908289 | TSS200                    | CNIH          | -4.892±0.439 | -5.416±0.514 | 1.83E-06 |
| cg09877136 | 14 | 54955533 | GeneBody/1st intron       | GMFB          | -4.752±0.441 | -5.091±0.55  | 9.95E-04 |
| cg14098132 | 14 | 54976507 | TSS200                    | CGRRF1        | -4.335±0.228 | -4.493±0.229 | 1.62E-03 |
| cg20629089 | 14 | 55034451 | GeneBody/5'UTR/1st exon   | SAMD4A        | -4.662±0.29  | -5.126±0.467 | 2.75E-08 |
| cg12422968 | 14 | 55369088 | GeneBody/1st exon         | GCH1          | -5.333±0.506 | -5.707±0.451 | 7.20E-04 |
| cg01838317 | 14 | 55369861 | TSS1500                   | GCH1          | -4.658±0.397 | -4.933±0.369 | 1.46E-03 |
| cg16047482 | 14 | 55493763 | GeneBody/5'UTR/1st exon   | WDHD1         | -5.466±0.348 | -6.012±0.555 | 4.25E-08 |
| cg02909042 | 14 | 55518132 | TSS1500                   | MAPK1IP1L     | -5.334±0.357 | -5.618±0.355 | 3.96E-04 |
| cg20016874 | 14 | 55518446 | GeneBody/5'UTR/1st exon   | MAPK1IP1L     | -5.445±0.498 | -5.85±0.513  | 3.26E-04 |
| cg19099850 | 14 | 55595958 | GeneBody/5'UTR/1st exon   | LGALS3        | -4.941±0.346 | -5.154±0.428 | 7.38E-03 |
| cg25465634 | 14 | 55658290 | GeneBody/5'UTR/1st exon   | DLGAP5        | -4.23±0.429  | -4.508±0.662 | 8.71E-03 |
| cg16249711 | 14 | 55907501 | TSS1500                   | TBPL2         | 2.982±0.294  | 3.195±0.393  | 2.20E-03 |
| cg14058432 | 14 | 56584702 | TSS1500                   | PELI2         | -4.908±0.425 | -5.185±0.364 | 2.24E-03 |
| cg21099488 | 14 | 56585486 | GeneBody/1st intron       | PELI2         | -4.216±0.273 | -4.436±0.426 | 1.34E-03 |
| cg01282432 | 14 | 57046857 | GeneBody/1st intron       | TMEM260       | -4.647±0.368 | -4.877±0.408 | 4.97E-03 |
| cg17071536 | 14 | 57736065 | TSS1500                   | EXOC5         | -5.05±0.411  | -5.431±0.491 | 8.73E-05 |
| cg19903229 | 14 | 57960650 | TSS200                    | C14orf105     | -0.946±0.275 | -0.695±0.429 | 3.29E-04 |
| cg15661409 | 14 | 57960976 | TSS1500                   | C14orf105     | 1.318±0.257  | 1.525±0.285  | 4.18E-04 |
| cg05957518 | 14 | 58711500 | TSS200                    | PSMA3         | -5.125±0.456 | -5.397±0.358 | 4.44E-03 |
| cg12533010 | 14 | 58711667 | GeneBody/1st intron       | PSMA3         | -4.18±0.535  | -4.707±0.646 | 4.02E-05 |
| cg12203852 | 14 | 58765243 | GeneBody/5'UTR/1st exon   | ARID4A        | -5.441±0.411 | -5.732±0.379 | 1.16E-03 |
| cg10537269 | 14 | 58894458 | TSS1500                   | TMM9          | -1.564±0.462 | -1.142±0.748 | 3.89E-04 |
| cg26850503 | 14 | 59105341 | TSS1500                   | DACT1         | -5.113±0.571 | -5.521±0.488 | 9.48E-04 |
| cg07401901 | 14 | 59655405 | GeneBody/5'UTR/1st exon   | DAAM1         | -5.113±0.274 | -5.274±0.303 | 7.98E-03 |
| cg24121436 | 14 | 60337690 | TSS200                    | RTN1          | -4.507±0.252 | -4.78±0.436  | 5.61E-05 |
| cg09694403 | 14 | 60632105 | GeneBody/5'UTR/1st exon   | DHRS7         | -5.682±0.632 | -6.13±0.597  | 1.19E-03 |
| cg03059018 | 14 | 61190965 | TSS200                    | SIX4          | -3.523±0.419 | -3.828±0.533 | 1.79E-03 |
| cg07052387 | 14 | 62161848 | TSS1500                   | HIF1A         | -4.665±0.391 | -4.925±0.383 | 2.28E-03 |
| cg26661257 | 14 | 62163091 | GeneBody/1st intron       | HIF1A         | -4.909±0.4   | -5.171±0.376 | 2.57E-03 |
| cg06887663 | 14 | 62228983 | TSS200                    | SNAPC1        | -4.163±0.301 | -4.386±0.291 | 8.26E-04 |
| cg06501084 | 14 | 63568195 | GeneBody/5'UTR/1st intron | KCNH5         | 0.497±0.283  | 0.306±0.298  | 2.39E-03 |
| cg02210123 | 14 | 63670835 | TSS1500                   | RHOJ          | -3.86±0.504  | -4.192±0.453 | 2.22E-03 |
| cg16107553 | 14 | 64010427 | TSS1500                   | PPP2R5E       | -4.596±0.525 | -4.941±0.666 | 4.50E-03 |
| cg26803566 | 14 | 64195104 | TSS1500                   | SGPP1         | -4.502±0.459 | -4.854±0.413 | 4.87E-04 |
| cg02018101 | 14 | 64320521 | GeneBody/5'UTR/1st intron | SYNE2         | -4.971±0.351 | -5.352±0.526 | 2.43E-05 |
| cg16792632 | 14 | 64761208 | TSS200                    | ESR2          | -5.021±0.388 | -5.338±0.438 | 3.71E-04 |
| cg13581475 | 14 | 64854533 | TSS1500                   | MTHFD1        | -5.751±0.547 | -6.232±0.581 | 1.31E-04 |
| cg11828669 | 14 | 64971476 | GeneBody/5'UTR/1st exon   | ZBTB1         | -4.43±0.345  | -4.637±0.314 | 5.06E-03 |
| cg19637116 | 14 | 65453410 | TSS200                    | FNTB          | -3.908±0.531 | -4.25±0.592  | 3.91E-03 |
| cg10740670 | 14 | 65453617 | GeneBody/5'UTR/1st exon   | FNTB          | -4.766±0.278 | -5.087±0.355 | 4.14E-06 |
| cg13555543 | 14 | 65568995 | GeneBody/1st intron       | MAX           | -5.033±0.384 | -5.322±0.455 | 1.08E-03 |
| cg08737421 | 14 | 65569903 | TSS1500                   | MAX           | -4.94±0.482  | -5.221±0.483 | 7.31E-03 |
| cg25922353 | 14 | 65876737 | TSS1500                   | FUT8          | 1.811±0.139  | 1.942±0.165  | 7.37E-05 |
| cg01428678 | 14 | 66974051 | TSS200                    | GPHN          | -3.688±0.369 | -3.933±0.424 | 3.23E-03 |
| cg08056903 | 14 | 66974163 | GeneBody/5'UTR/1st exon   | GPHN          | -4.082±0.337 | -4.342±0.471 | 1.40E-03 |
| cg07218192 | 14 | 67707706 | TSS1500                   | MPP5          | -4.59±0.285  | -4.837±0.405 | 4.00E-04 |
| cg02045085 | 14 | 67708311 | GeneBody/5'UTR/1st intron | MPP5          | -5.608±0.492 | -5.938±0.48  | 2.11E-03 |
| cg00496170 | 14 | 67826880 | TSS200                    | EIF2S1        | -5.239±0.534 | -5.67±0.481  | 2.69E-04 |
| cg12648263 | 14 | 68067090 | TSS200                    | PIGH          | -5.357±0.388 | -5.835±0.548 | 2.34E-06 |
| cg12575181 | 14 | 68067658 | TSS1500                   | PIGH          | 3.03±0.198   | 3.145±0.193  | 7.16E-03 |
| cg18458993 | 14 | 68086576 | TSS200                    | ARG2          | -4.335±0.356 | -4.722±0.634 | 6.46E-05 |
| cg00682653 | 14 | 68141442 | GeneBody/5'UTR/1st exon   | VT1B          | -5.122±0.493 | -5.446±0.618 | 4.32E-03 |
| cg04269351 | 14 | 68142533 | TSS1500                   | VT1B          | 2.851±0.199  | 3.017±0.267  | 5.06E-04 |
| cg25484319 | 14 | 68162304 | GeneBody/1st intron       | RDH11         | -2.872±0.529 | -3.346±0.6   | 1.22E-04 |
| cg11220635 | 14 | 68162577 | TSS200                    | RDH11         | -3.708±0.247 | -3.47±0.458  | 4.27E-04 |
| cg04394967 | 14 | 68189457 | GeneBody                  | RDH12         | -3.49±0.336  | -3.708±0.368 | 3.62E-03 |
| cg21861211 | 14 | 68283527 | TSS1500                   | ZFYVE26       | -5.31±0.587  | -5.645±0.527 | 7.38E-03 |
| cg09424925 | 14 | 68286418 | TSS200                    | RAD51B        | -3.787±0.556 | -4.126±0.443 | 3.74E-03 |
| cg08158860 | 14 | 68286515 | GeneBody/5'UTR/1st exon   | RAD51B        | -4.42±0.536  | -4.835±0.624 | 7.50E-04 |
| cg01928902 | 14 | 69259640 | GeneBody/1st exon         | ZFP36L1       | -4.356±0.286 | -4.671±0.407 | 1.46E-05 |
| cg15558971 | 14 | 69260307 | GeneBody/5'UTR/1st exon   | ZFP36L1       | -4.909±0.405 | -5.192±0.377 | 1.34E-03 |
| cg21350283 | 14 | 69445743 | GeneBody/1st exon         | ACTN1         | -4.972±0.437 | -5.413±0.623 | 5.57E-05 |
| cg08653874 | 14 | 70233918 | GeneBody/5'UTR/1st exon   | SRSF5         | -4.439±0.367 | -4.747±0.58  | 8.86E-04 |
| cg14174099 | 14 | 70655862 | TSS200                    | SLC8A3        | -5.176±0.441 | -5.511±0.452 | 6.70E-04 |
| cg25346972 | 14 | 70826282 | GeneBody/1st exon         | COX16         | -5.304±0.326 | -5.555±0.298 | 4.63E-04 |
| cg26709859 | 14 | 70883674 | GeneBody/1st exon         | SYNJ2BP-COX16 | -4.511±0.456 | -4.924±0.536 | 1.15E-04 |
| cg26097271 | 14 | 71067346 | GeneBody/1st exon         | MED6          | -4.368±0.405 | -4.647±0.318 | 1.17E-03 |
| cg07774222 | 14 | 71067759 | TSS1500                   | MED6          | -5.218±0.382 | -5.601±0.54  | 5.85E-05 |
| cg16747567 | 14 | 71373858 | TSS1500                   | PCNX          | -3.858±0.329 | -4.23±0.465  | 9.39E-06 |
| cg03188118 | 14 | 72399809 | GeneBody/5'UTR/1st exon   | RGS6          | -1.458±0.504 | -0.999±0.691 | 1.88E-04 |
| cg07070694 | 14 | 73493830 | GeneBody/5'UTR/1st exon   | ZFYVE1        | -3.052±0.173 | -3.253±0.303 | 2.06E-05 |
| cg25694542 | 14 | 73493846 | GeneBody/5'UTR/1st exon   | ZFYVE1        | -4.759±0.348 | -5.192±0.541 | 3.17E-06 |
| cg11490446 | 14 | 73602923 | TSS1500                   | PSEN1         | -4.322±0.317 | -4.617±0.415 | 1.19E-04 |
| cg20302307 | 14 | 73925368 | TSS200                    | NUMB          | -4.54±0.247  | -4.678±0.243 | 9.62E-03 |
| cg11378052 | 14 | 74027058 | TSS1500                   | HEATR4        | 1.125±0.268  | 0.949±0.352  | 4.82E-03 |
| cg23681213 | 14 | 74180391 | GeneBody/5'UTR/1st exon   | PNMA1         | -3.337±0.289 | -3.598±0.372 | 1.68E-04 |
| cg03617367 | 14 | 74226931 | GeneBody/5'UTR/1st exon   | ELMSAN1       | -5.513±0.544 | -6.009±0.551 | 7.20E-05 |
| cg23940655 | 14 | 74227020 | TSS200                    | ELMSAN1       | -4.934±0.556 | -5.346±0.587 | 9.36E-04 |
| cg15729423 | 14 | 74318413 | TSS200                    | PTGR2         | -4.563±0.351 | -4.916±0.54  | 8.43E-05 |

|            |    |           |                           |                   |              |              |          |
|------------|----|-----------|---------------------------|-------------------|--------------|--------------|----------|
| cg02275830 | 14 | 74318774  | GeneBody/5'UTR/1st exon   | <i>PTGR2</i>      | -5.64±0.542  | -6.057±0.498 | 4.86E-04 |
| cg12152256 | 14 | 74353709  | GeneBody/1st intron       | <i>ZNF410</i>     | -5.069±0.354 | -5.415±0.483 | 6.92E-05 |
| cg07807817 | 14 | 74416425  | TSS1500                   | <i>COQ6</i>       | -3.146±0.406 | -3.386±0.496 | 9.77E-03 |
| cg15492104 | 14 | 74417249  | TSS200                    | <i>FAM161B</i>    | -4.793±0.298 | -5.106±0.468 | 5.00E-05 |
| cg22201387 | 14 | 74485554  | GeneBody/5'UTR/1st intron | <i>ENTPD5</i>     | -4.854±0.387 | -5.182±0.544 | 4.97E-04 |
| cg09194436 | 14 | 74551682  | GeneBody/1st exon         | <i>LIN52</i>      | -5.234±0.619 | -5.826±0.553 | 2.95E-05 |
| cg15912427 | 14 | 74769201  | GeneBody/1st intron       | <i>ABCD4</i>      | -4.049±0.47  | -4.349±0.542 | 4.61E-03 |
| cg06291595 | 14 | 74960292  | TSS200                    | <i>ISCA2</i>      | -3.907±0.367 | -4.158±0.57  | 5.88E-03 |
| cg04798158 | 14 | 75179846  | TSS200                    | <i>FCF1</i>       | -4.793±0.476 | -5.162±0.573 | 8.09E-04 |
| cg19182046 | 14 | 75179862  | GeneBody/5'UTR/1st exon   | <i>FCF1</i>       | -3.954±0.452 | -4.26±0.594  | 3.74E-03 |
| cg26666286 | 14 | 75180882  | GeneBody                  | <i>FCF1</i>       | 2.074±0.343  | 2.307±0.337  | 1.92E-03 |
| cg24482053 | 14 | 75518003  | GeneBody/5'UTR/1st intron | <i>MLH3</i>       | -4.502±0.387 | -4.757±0.365 | 2.33E-03 |
| cg23407670 | 14 | 75518217  | GeneBody/5'UTR/1st exon   | <i>MLH3</i>       | -4.768±0.516 | -5.263±0.53  | 3.69E-05 |
| cg19691267 | 14 | 75530649  | GeneBody/5'UTR/1st intron | <i>ACYP1</i>      | -3.819±0.353 | -4.084±0.414 | 1.07E-03 |
| cg14984307 | 14 | 75530737  | TSS200                    | <i>ACYP1</i>      | -4.579±0.522 | -4.932±0.512 | 2.01E-03 |
| cg08847533 | 14 | 75593920  | TSS200                    | <i>NEK9</i>       | -4.746±0.64  | -5.364±0.64  | 3.20E-05 |
| cg18672421 | 14 | 75643415  | TSS200                    | <i>TMED10</i>     | -5.085±0.733 | -5.659±0.835 | 6.20E-04 |
| cg17644867 | 14 | 75746076  | GeneBody/1st intron       | <i>FOS</i>        | -4.921±0.313 | -5.334±0.478 | 9.77E-07 |
| cg09430689 | 14 | 76127296  | GeneBody/5'UTR/1st exon   | <i>C14orf1</i>    | -6.315±0.498 | -6.62±0.508  | 5.08E-03 |
| cg14008119 | 14 | 76451930  | TSS200                    | <i>IFT43</i>      | -4.641±0.337 | -4.862±0.312 | 2.35E-03 |
| cg13438944 | 14 | 76452183  | GeneBody/1st exon         | <i>IFT43</i>      | -4.844±0.365 | -5.267±0.515 | 6.37E-06 |
| cg04371779 | 14 | 76618201  | TSS200                    | <i>GPATCH2L</i>   | -5.351±0.419 | -5.701±0.478 | 2.93E-04 |
| cg14171478 | 14 | 76618642  | GeneBody/5'UTR/1st intron | <i>GPATCH2L</i>   | -4.322±0.273 | -4.525±0.253 | 6.93E-04 |
| cg18489434 | 14 | 77228510  | GeneBody/5'UTR/1st exon   | <i>VASH1</i>      | -5.418±0.438 | -5.751±0.543 | 1.08E-03 |
| cg01457080 | 14 | 77278578  | GeneBody/1st intron       | <i>ANGEL1</i>     | -4.927±0.4   | -5.458±0.511 | 4.20E-07 |
| cg03366677 | 14 | 77495018  | GeneBody/5'UTR/1st exon   | <i>IRF2BP1</i>    | -6.072±0.528 | -6.654±0.634 | 7.22E-06 |
| cg07989514 | 14 | 77495178  | TSS200                    | <i>IRF2BP1</i>    | -5.299±0.338 | -5.526±0.3   | 1.86E-03 |
| cg16961092 | 14 | 77564635  | GeneBody/5'UTR/1st exon   | <i>KIAA1737</i>   | -5.729±0.464 | -6.134±0.619 | 2.87E-04 |
| cg15561986 | 14 | 77788381  | GeneBody/5'UTR/1st intron | <i>GSTZ1</i>      | -4.461±0.372 | -4.708±0.407 | 2.94E-03 |
| cg17080180 | 14 | 77788400  | GeneBody/5'UTR/1st intron | <i>GSTZ1</i>      | -4.291±0.44  | -4.613±0.51  | 1.32E-03 |
| cg17598875 | 14 | 77923690  | GeneBody/5'UTR/1st intron | <i>VIPAS39</i>    | -4.601±0.534 | -4.901±0.499 | 8.59E-03 |
| cg19815139 | 14 | 77924143  | TSS200                    | <i>VIPAS39</i>    | -4.783±0.35  | -5.07±0.428  | 4.72E-04 |
| cg27553433 | 14 | 78083305  | TSS200                    | <i>SPITLC2</i>    | -4.773±0.478 | -5.163±0.395 | 2.09E-04 |
| cg17809798 | 14 | 78226923  | TSS1500                   | <i>C14orf178</i>  | -4.454±0.546 | -4.783±0.491 | 4.81E-03 |
| cg12781395 | 14 | 78227701  | TSS1500                   | <i>SNW1</i>       | -3.487±0.46  | -3.221±0.455 | 7.85E-03 |
| cg24987170 | 14 | 78266229  | TSS200                    | <i>ADCK1</i>      | -3.919±0.415 | -4.239±0.45  | 6.51E-04 |
| cg08426384 | 14 | 78266734  | GeneBody/5'UTR/1st intron | <i>ADCK1</i>      | -3.829±0.218 | -4.082±0.359 | 1.38E-05 |
| cg00217795 | 14 | 80677688  | TSS200                    | <i>DIO2-AS1</i>   | -0.447±0.321 | -0.256±0.349 | 7.06E-03 |
| cg10334928 | 14 | 81865007  | GeneBody/5'UTR/1st intron | <i>STON2</i>      | 2.265±0.286  | 2.435±0.283  | 6.02E-03 |
| cg10686044 | 14 | 82000026  | GeneBody/1st exon         | <i>SEL1L</i>      | -5.26±0.423  | -5.653±0.651 | 2.45E-04 |
| cg12269343 | 14 | 82000433  | TSS1500                   | <i>SEL1L</i>      | -4.423±0.562 | -4.836±0.564 | 9.37E-04 |
| cg14046757 | 14 | 89029605  | TSS200                    | <i>ZC3H14</i>     | -5.015±0.414 | -5.317±0.402 | 9.63E-04 |
| cg00009407 | 14 | 89290921  | TSS200                    | <i>TTC8</i>       | -5.842±0.609 | -6.175±0.525 | 9.48E-03 |
| cg11821536 | 14 | 89291100  | GeneBody/1st exon         | <i>TTC8</i>       | -5.95±0.493  | -6.301±0.426 | 9.94E-04 |
| cg05923056 | 14 | 89883246  | GeneBody/5'UTR/1st exon   | <i>FOXN3</i>      | -4.761±0.676 | -5.252±0.567 | 7.71E-04 |
| cg23533073 | 14 | 89884062  | GeneBody/1st exon         | <i>FOXN3-AS1</i>  | -4.824±0.291 | -5.044±0.516 | 4.07E-03 |
| cg24023606 | 14 | 90421208  | TSS200                    | <i>EFCAB11</i>    | -5.399±0.374 | -5.671±0.496 | 1.99E-03 |
| cg02276686 | 14 | 90722856  | TSS200                    | <i>PSMC1</i>      | -4.279±0.455 | -4.627±0.551 | 9.51E-04 |
| cg00128654 | 14 | 90798063  | GeneBody/1st intron       | <i>NRDE2</i>      | -5.145±0.604 | -5.522±0.544 | 3.58E-03 |
| cg03062665 | 14 | 90863127  | TSS200                    | <i>CALM1</i>      | -5.822±0.613 | -6.392±0.627 | 5.56E-05 |
| cg20328328 | 14 | 90863801  | GeneBody/1st intron       | <i>CALM1</i>      | -4.786±0.364 | -5.21±0.476  | 4.03E-06 |
| cg02904235 | 14 | 91527369  | TSS1500                   | <i>RPS6KA5</i>    | -4.883±0.628 | -5.426±0.674 | 1.64E-04 |
| cg25398949 | 14 | 91527472  | TSS1500                   | <i>RPS6KA5</i>    | -4.556±0.476 | -4.912±0.512 | 8.90E-04 |
| cg21700166 | 14 | 91720227  | TSS200                    | <i>GPR68</i>      | -2.863±0.319 | -3.148±0.416 | 1.94E-04 |
| cg26910205 | 14 | 91977306  | TSS1500                   | <i>SMEK1</i>      | -4.738±0.422 | -5.065±0.467 | 6.42E-04 |
| cg24633648 | 14 | 92302448  | GeneBody/5'UTR/1st intron | <i>TC2N</i>       | -3.158±0.232 | -3.362±0.404 | 8.56E-04 |
| cg06279414 | 14 | 92506140  | GeneBody/5'UTR/1st exon   | <i>TRIP11</i>     | -4.651±0.331 | -4.921±0.489 | 8.96E-04 |
| cg09458170 | 14 | 92572575  | GeneBody/1st intron       | <i>ATXN3</i>      | -4.536±0.37  | -4.978±0.436 | 1.83E-06 |
| cg24527001 | 14 | 92588234  | TSS200                    | <i>CPSF2</i>      | -5.125±0.404 | -5.494±0.533 | 1.56E-04 |
| cg12685200 | 14 | 93214923  | GeneBody/5'UTR/1st exon   | <i>LGMN</i>       | -5.471±0.407 | -5.745±0.499 | 3.37E-03 |
| cg18477315 | 14 | 93261178  | GeneBody/5'UTR/1st intron | <i>GOLGA5</i>     | -4.359±0.352 | -4.587±0.526 | 7.71E-03 |
| cg16628119 | 14 | 93582398  | TSS200                    | <i>ITPK1</i>      | -4.394±0.376 | -4.678±0.584 | 2.39E-03 |
| cg12873941 | 14 | 93651794  | GeneBody/1st exon         | <i>TMEM251</i>    | -4.429±0.548 | -4.884±0.562 | 2.47E-04 |
| cg11172299 | 14 | 93673792  | TSS1500                   | <i>C14orf142</i>  | -5.998±0.463 | -6.297±0.497 | 3.55E-03 |
| cg12730424 | 14 | 93799109  | GeneBody/5'UTR/1st intron | <i>BTBD7</i>      | -4.518±0.632 | -4.877±0.539 | 7.19E-03 |
| cg00008493 | 14 | 93813777  | GeneBody/1st intron       | <i>COX8C</i>      | 5.036±0.452  | 5.283±0.352  | 8.74E-03 |
| cg18680021 | 14 | 94492759  | GeneBody/5'UTR/1st exon   | <i>OTUB2</i>      | -5.37±0.526  | -5.86±0.564  | 6.12E-05 |
| cg18050213 | 14 | 94595944  | GeneBody/5'UTR/1st exon   | <i>IFI27L2</i>    | -5.274±0.306 | -5.524±0.501 | 1.40E-03 |
| cg06887170 | 14 | 94596104  | TSS200                    | <i>IFI27L2</i>    | -4.2±0.61    | -4.73±0.556  | 1.10E-04 |
| cg19630689 | 14 | 94984381  | TSS200                    | <i>SERPINA12</i>  | -2.173±0.28  | -2.34±0.345  | 9.28E-03 |
| cg08495878 | 14 | 95027859  | GeneBody/5'UTR/1st intron | <i>SERPINA4</i>   | 1.27±0.27    | 1.441±0.294  | 4.56E-03 |
| cg25889160 | 14 | 95046342  | TSS1500                   | <i>SERPINA5</i>   | 2.678±0.203  | 2.8±0.196    | 5.66E-03 |
| cg22013966 | 14 | 95106170  | TSS1500                   | <i>SERPINA13P</i> | 1.382±0.243  | 1.592±0.312  | 2.99E-04 |
| cg17291001 | 14 | 95107626  | GeneBody/1st intron       | <i>SERPINA13P</i> | 1.991±0.168  | 2.106±0.262  | 5.98E-03 |
| cg19224837 | 14 | 95236615  | TSS200                    | <i>GSC</i>        | -4.837±0.469 | -5.111±0.546 | 9.37E-03 |
| cg21339926 | 14 | 95786621  | TSS1500                   | <i>CLMN</i>       | -3.951±0.346 | -4.168±0.461 | 7.43E-03 |
| cg04514469 | 14 | 95942666  | TSS1500                   | <i>SYNE3</i>      | 1.867±0.213  | 2.006±0.299  | 6.47E-03 |
| cg17504464 | 14 | 96857890  | TSS1500                   | <i>AK7</i>        | -4.636±0.422 | -4.99±0.325  | 1.39E-04 |
| cg18936744 | 14 | 96858458  | GeneBody/5'UTR/1st exon   | <i>AK7</i>        | -4.224±0.622 | -4.866±0.585 | 1.03E-05 |
| cg07016325 | 14 | 96968745  | GeneBody/5'UTR/1st exon   | <i>PAPOLA</i>     | -5.986±0.714 | -6.554±0.693 | 3.70E-04 |
| cg24169915 | 14 | 99177987  | GeneBody/5'UTR/1st exon   | <i>C14orf177</i>  | -1.555±0.251 | -1.769±0.286 | 2.30E-04 |
| cg27559343 | 14 | 99947096  | GeneBody/5'UTR/1st exon   | <i>SETD3</i>      | -4.84±0.35   | -5.253±0.566 | 9.83E-06 |
| cg23733753 | 14 | 100151063 | GeneBody/1st intron       | <i>CYP46A1</i>    | -4.314±0.338 | -4.539±0.296 | 1.93E-03 |
| cg20009671 | 14 | 100704671 | TSS1500                   | <i>YY1</i>        | -5.641±0.472 | -5.906±0.472 | 9.61E-03 |
| cg22763181 | 14 | 100705159 | GeneBody/5'UTR/1st exon   | <i>YY1</i>        | -3.802±0.468 | -4.14±0.501  | 1.28E-03 |
| cg09002165 | 14 | 100772949 | TSS200                    | <i>SLC25A29</i>   | -5.163±0.423 | -5.599±0.661 | 6.36E-05 |
| cg00239071 | 14 | 100789737 | GeneBody/5'UTR/1st exon   | <i>SLC25A47</i>   | 4.037±0.274  | 3.83±0.339   | 1.14E-03 |
| cg07672479 | 14 | 102431106 | GeneBody/1st exon         | <i>DYNC1H1</i>    | -5.132±0.471 | -5.896±0.662 | 1.02E-08 |
| cg10833014 | 14 | 102605952 | GeneBody/5'UTR/1st exon   | <i>HSP90AA1</i>   | -4.748±0.295 | -5.066±0.484 | 4.46E-05 |
| cg04281268 | 14 | 102606293 | GeneBody/1st exon         | <i>WDR20</i>      | -5.137±0.319 | -5.552±0.447 | 8.31E-07 |
| cg18211447 | 14 | 102771717 | TSS200                    | <i>MOK</i>        | -4.215±0.397 | -4.671±0.501 | 4.43E-06 |
| cg22474507 | 14 | 102829872 | GeneBody/5'UTR/1st intron | <i>TECP2</i>      | -4.977±0.362 | -5.196±0.339 | 4.90E-03 |
| cg09556292 | 14 | 103058815 | TSS200                    | <i>RCOR1</i>      | -4.648±0.386 | -4.876±0.366 | 6.13E-03 |
| cg24165760 | 14 | 103243389 | TSS1500                   | <i>TRAF3</i>      | -4.576±0.562 | -4.965±0.593 | 1.83E-03 |
| cg08999486 | 14 | 103523305 | GeneBody/1st intron       | <i>CDC42BPB</i>   | -4.892±0.474 | -5.221±0.608 | 2.90E-03 |

|            |    |           |                           |                   |              |              |          |
|------------|----|-----------|---------------------------|-------------------|--------------|--------------|----------|
| cg01333131 | 14 | 103524584 | TSS1500                   | <i>CDC42BPB</i>   | -2.694±0.283 | -2.367±0.523 | 3.42E-05 |
| cg22388943 | 14 | 103799756 | TSS1500                   | <i>EIF5</i>       | -4.792±0.324 | -5.111±0.506 | 1.19E-04 |
| cg18263030 | 14 | 103852417 | GeneBody/1st exon         | <i>MARK3</i>      | -4.722±0.509 | -5.094±0.63  | 1.63E-03 |
| cg05786809 | 14 | 103989478 | TSS1500                   | <i>CKB</i>        | -4.094±0.37  | -4.385±0.527 | 1.17E-03 |
| cg15569512 | 14 | 104029667 | GeneBody/1st intron       | <i>APOPT1</i>     | -4.934±0.399 | -5.238±0.59  | 1.84E-03 |
| cg05032550 | 14 | 104387812 | GeneBody/5'UTR/1st exon   | <i>C14orf2</i>    | -6.093±0.606 | -6.542±0.513 | 6.35E-04 |
| cg14083376 | 14 | 104388097 | TSS200                    | <i>C14orf2</i>    | -5.371±0.388 | -5.764±0.428 | 2.03E-05 |
| cg07613153 | 14 | 104436947 | GeneBody                  | <i>TDRD9</i>      | 0.22±0.256   | 0.059±0.323  | 6.45E-03 |
| cg22090592 | 14 | 105174642 | GeneBody                  | <i>INF2</i>       | 0.481±0.111  | 0.599±0.189  | 7.51E-05 |
| cg24404909 | 14 | 105175111 | GeneBody                  | <i>INF2</i>       | -3.19±0.187  | -3.465±0.351 | 6.12E-07 |
| cg14043411 | 14 | 105219857 | GeneBody/1st intron       | <i>SIVA1</i>      | -6.058±0.569 | -6.517±0.522 | 2.77E-04 |
| cg12345724 | 14 | 105488366 | TSS1500                   | <i>CDCA4</i>      | -4.847±0.282 | -5.238±0.466 | 6.96E-07 |
| cg27177839 | 14 | 105635769 | TSS1500                   | <i>JAG2</i>       | -3.085±0.263 | -3.267±0.348 | 3.36E-03 |
| cg00105253 | 14 | 105647194 | GeneBody/1st intron       | <i>NUDT14</i>     | -3.521±0.258 | -3.756±0.38  | 2.55E-04 |
| cg20222911 | 14 | 105886024 | TSS200                    | <i>MTA1</i>       | -4.063±0.389 | -4.347±0.533 | 2.12E-03 |
| cg03451296 | 14 | 105940391 | TSS1500                   | <i>CRIP2</i>      | -5.578±0.546 | -5.95±0.526  | 1.80E-03 |
| cg22634689 | 14 | 105993363 | GeneBody/5'UTR/1st intron | <i>TMEM121</i>    | -4.477±0.297 | -4.679±0.333 | 2.47E-03 |
| cg25490410 | 15 | 22833975  | GeneBody/1st intron       | <i>TUBGCP5</i>    | -4.092±0.485 | -4.498±0.513 | 2.43E-04 |
| cg22432269 | 15 | 22892697  | GeneBody/5'UTR/1st exon   | <i>CYFIP1</i>     | -5.692±0.62  | -6.12±0.543  | 1.36E-03 |
| cg15566783 | 15 | 23034186  | GeneBody/5'UTR/1st exon   | <i>NIPA2</i>      | -5.17±0.496  | -5.533±0.509 | 1.02E-03 |
| cg24154474 | 15 | 23086979  | TSS200                    | <i>NIPA1</i>      | -4.432±0.377 | -4.69±0.489  | 3.33E-03 |
| cg06907544 | 15 | 23255227  | TSS200                    | <i>GOLGA8I</i>    | 1.609±0.11   | 1.757±0.227  | 7.29E-06 |
| cg18602919 | 15 | 23931674  | GeneBody/1st exon         | <i>NDN</i>        | 0.675±0.196  | 0.987±0.259  | 1.17E-08 |
| cg16321029 | 15 | 25068850  | GeneBody/5'UTR/1st exon   | <i>SNRPN</i>      | -0.024±0.196 | -0.15±0.257  | 5.63E-03 |
| cg26033681 | 15 | 25069376  | GeneBody/5'UTR/1st intron | <i>SNRPN</i>      | -0.497±0.203 | -0.634±0.241 | 2.90E-03 |
| cg19195724 | 15 | 25287297  | 0                         | 0                 | 1.773±0.424  | 1.194±0.668  | 6.70E-07 |
| cg26389232 | 15 | 25296693  | GeneBody/1st exon         | <i>SNORD116-1</i> | 2.965±0.219  | 3.123±0.323  | 3.00E-03 |
| cg09839960 | 15 | 25523494  | GeneBody/1st exon         | <i>SNORD109B</i>  | 2.935±0.202  | 3.102±0.257  | 4.61E-04 |
| cg02517489 | 15 | 25683075  | GeneBody/5'UTR/1st intron | <i>UBE3A</i>      | -4.093±0.327 | -4.339±0.442 | 1.61E-03 |
| cg12177023 | 15 | 25683251  | GeneBody/5'UTR/1st intron | <i>UBE3A</i>      | -5.361±0.489 | -5.666±0.415 | 3.35E-03 |
| cg12572011 | 15 | 25684085  | GeneBody/5'UTR/1st exon   | <i>UBE3A</i>      | -5.067±0.443 | -5.475±0.603 | 1.59E-04 |
| cg00792740 | 15 | 25684488  | TSS1500                   | <i>UBE3A</i>      | -3.662±0.2   | -3.928±0.329 | 1.45E-06 |
| cg27458888 | 15 | 25684578  | TSS1500                   | <i>UBE3A</i>      | -4.413±0.351 | -4.682±0.436 | 9.78E-04 |
| cg12582965 | 15 | 25972328  | GeneBody                  | <i>ATP10A</i>     | 3.792±0.278  | 3.983±0.375  | 3.52E-03 |
| cg20119871 | 15 | 25972400  | GeneBody                  | <i>ATP10A</i>     | 2.488±0.268  | 2.699±0.318  | 6.49E-04 |
| cg23623692 | 15 | 26003464  | GeneBody                  | <i>ATP10A</i>     | 2.177±0.217  | 2.318±0.336  | 8.66E-03 |
| cg11510839 | 15 | 28344488  | TSS200                    | <i>OCA2</i>       | -4.984±0.591 | -5.305±0.468 | 9.17E-03 |
| cg17186444 | 15 | 29561501  | GeneBody/1st exon         | <i>NDNL2</i>      | -5.071±0.374 | -5.456±0.487 | 2.83E-05 |
| cg01665633 | 15 | 29562142  | TSS200                    | <i>NDNL2</i>      | -4.599±0.404 | -4.92±0.41   | 4.04E-04 |
| cg06319346 | 15 | 30686892  | TSS1500                   | <i>CHRFAM7A</i>   | 1.739±0.137  | 1.911±0.228  | 4.16E-06 |
| cg01939479 | 15 | 31195982  | TSS200                    | <i>FAN1</i>       | -4.344±0.683 | -4.792±0.768 | 3.44E-03 |
| cg14323928 | 15 | 31393845  | GeneBody/5'UTR/1st intron | <i>TRPM1</i>      | 2.507±0.221  | 2.693±0.238  | 2.40E-04 |
| cg12056618 | 15 | 31619949  | GeneBody/1st exon         | <i>KLF13</i>      | -4.757±0.308 | -5.005±0.415 | 7.67E-04 |
| cg04785227 | 15 | 32321637  | TSS1500                   | <i>CHRNA7</i>     | -4.387±0.33  | -4.72±0.414  | 3.25E-05 |
| cg18721882 | 15 | 32907058  | TSS1500                   | <i>ARHGAP11A</i>  | -4.288±0.321 | -4.689±0.496 | 2.89E-06 |
| cg05898356 | 15 | 32908088  | GeneBody/5'UTR/1st exon   | <i>ARHGAP11A</i>  | -4.34±0.413  | -4.673±0.514 | 5.70E-04 |
| cg08722720 | 15 | 34331557  | TSS1500                   | <i>AVEN</i>       | -4.077±0.23  | -4.336±0.379 | 2.35E-05 |
| cg27379417 | 15 | 34394218  | TSS200                    | <i>PGBD4</i>      | -4.871±0.478 | -5.24±0.474  | 5.42E-04 |
| cg12237946 | 15 | 34394376  | GeneBody/5'UTR/1st exon   | <i>PGBD4</i>      | -2.26±0.344  | -1.996±0.473 | 1.35E-03 |
| cg19021732 | 15 | 34502525  | TSS1500                   | <i>KATNBL1</i>    | -3.492±0.244 | -3.728±0.319 | 6.98E-05 |
| cg12476968 | 15 | 34610829  | GeneBody/1st exon         | <i>SLC12A6</i>    | -2.95±0.521  | -3.328±0.504 | 9.81E-04 |
| cg14307212 | 15 | 34611009  | GeneBody/5'UTR/1st exon   | <i>SLC12A6</i>    | -3.268±0.373 | -3.486±0.444 | 9.72E-03 |
| cg11039072 | 15 | 35280907  | TSS1500                   | <i>ZNF770</i>     | -4.414±0.339 | -4.763±0.422 | 2.45E-05 |
| cg12288842 | 15 | 35837901  | TSS1500                   | <i>DPH6-AS1</i>   | -4.256±0.371 | -4.461±0.352 | 9.97E-03 |
| cg05861661 | 15 | 38746192  | TSS200                    | <i>FAM98B</i>     | -4.314±0.552 | -4.637±0.42  | 5.03E-03 |
| cg10174687 | 15 | 38746780  | GeneBody/1st intron       | <i>FAM98B</i>     | -5.311±0.577 | -5.645±0.534 | 6.92E-03 |
| cg06952236 | 15 | 38856341  | GeneBody/1st intron       | <i>RASGRP1</i>    | -4.149±0.264 | -4.451±0.395 | 1.01E-05 |
| cg04051458 | 15 | 39873060  | TSS1500                   | <i>THBS1</i>      | -4.625±0.361 | -4.831±0.307 | 6.95E-03 |
| cg22936016 | 15 | 40075187  | TSS200                    | <i>FSIP1</i>      | -3.706±0.419 | -3.984±0.456 | 4.72E-03 |
| cg07466531 | 15 | 40331758  | GeneBody/1st intron       | <i>SRP14-AS1</i>  | -4.73±0.418  | -5.1±0.567   | 2.63E-04 |
| cg07000551 | 15 | 40401297  | TSS1500                   | <i>BMF</i>        | -5.361±0.455 | -5.659±0.358 | 1.99E-03 |
| cg20259534 | 15 | 40453036  | TSS200                    | <i>BUB1B</i>      | -4.815±0.348 | -5.057±0.331 | 1.45E-03 |
| cg14343107 | 15 | 40453695  | GeneBody/1st intron       | <i>BUB1B</i>      | -4.717±0.403 | -4.98±0.339  | 2.22E-03 |
| cg10563284 | 15 | 40531152  | TSS200                    | <i>PAK6</i>       | -4.383±0.324 | -4.671±0.517 | 4.91E-04 |
| cg16119128 | 15 | 40630304  | GeneBody                  | <i>C15orf52</i>   | -3.241±0.403 | -3.48±0.435  | 7.30E-03 |
| cg06731484 | 15 | 40697714  | GeneBody/5'UTR/1st exon   | <i>IVD</i>        | -4.602±0.5   | -4.94±0.521  | 2.24E-03 |
| cg23228048 | 15 | 40732820  | TSS1500                   | <i>BAHD1</i>      | -4.092±0.297 | -4.368±0.392 | 1.24E-04 |
| cg07114024 | 15 | 40733806  | GeneBody/5'UTR/1st intron | <i>BAHD1</i>      | -4.562±0.341 | -4.854±0.597 | 1.17E-03 |
| cg14924091 | 15 | 40763073  | TSS200                    | <i>CHST14</i>     | -5.458±0.479 | -5.76±0.419  | 3.15E-03 |
| cg17146877 | 15 | 40856878  | GeneBody/1st intron       | <i>C15orf57</i>   | -3.9±0.538   | -4.236±0.603 | 5.11E-03 |
| cg20314325 | 15 | 40886501  | GeneBody/5'UTR/1st exon   | <i>CASC5</i>      | -5.017±0.418 | -5.296±0.347 | 1.79E-03 |
| cg21465754 | 15 | 40986872  | GeneBody                  | <i>RAD51-AS1</i>  | -5.408±0.618 | -5.895±0.609 | 4.20E-04 |
| cg04662451 | 15 | 40987790  | GeneBody/5'UTR/1st intron | <i>RAD51</i>      | -4.462±0.386 | -4.726±0.375 | 1.75E-03 |
| cg05019152 | 15 | 41047360  | GeneBody/5'UTR/1st exon   | <i>RMDN3</i>      | -5.33±0.528  | -5.786±0.499 | 1.25E-04 |
| cg17316750 | 15 | 41047892  | TSS1500                   | <i>RMDN3</i>      | -4.446±0.504 | -4.867±0.458 | 1.73E-04 |
| cg23424268 | 15 | 41056053  | TSS1500                   | <i>GCHFR</i>      | -5.14±0.343  | -5.542±0.525 | 7.58E-06 |
| cg09264112 | 15 | 41056369  | GeneBody/5'UTR/1st exon   | <i>GCHFR</i>      | -4.94±0.4    | -5.391±0.602 | 1.30E-05 |
| cg15059511 | 15 | 41099719  | TSS200                    | <i>DNAJC17</i>    | -4.945±0.365 | -5.197±0.415 | 2.22E-03 |
| cg05120641 | 15 | 41245706  | GeneBody/1st exon         | <i>CHAC1</i>      | -5.221±0.418 | -5.561±0.548 | 6.29E-04 |
| cg06380007 | 15 | 41408085  | GeneBody/5'UTR/1st intron | <i>INO80</i>      | -5.72±0.476  | -5.995±0.456 | 7.38E-03 |
| cg08618113 | 15 | 41523882  | GeneBody/1st intron       | <i>CHP1</i>       | -3.761±0.228 | -3.983±0.313 | 7.46E-05 |
| cg19468534 | 15 | 41623761  | GeneBody                  | <i>OIP5</i>       | 0.666±0.245  | 0.441±0.409  | 4.37E-04 |
| cg11324740 | 15 | 41624793  | GeneBody/5'UTR/1st exon   | <i>OIP5</i>       | -4.27±0.394  | -4.551±0.605 | 3.87E-03 |
| cg12460541 | 15 | 41785560  | TSS1500                   | <i>ITPKA</i>      | -2.573±0.4   | -2.074±0.436 | 7.22E-07 |
| cg18619831 | 15 | 41836576  | TSS200                    | <i>RPAP1</i>      | -5.659±0.443 | -5.984±0.5   | 1.22E-03 |
| cg21070730 | 15 | 42264527  | GeneBody/1st exon         | <i>EHD4</i>       | -4.893±0.45  | -5.207±0.516 | 2.08E-03 |
| cg14792155 | 15 | 42289618  | GeneBody                  | <i>PLA2G4E</i>    | 2.852±0.401  | 3.157±0.54   | 1.39E-03 |
| cg25122941 | 15 | 42500342  | GeneBody/1st exon         | <i>VPS39</i>      | -5.193±0.664 | -5.622±0.706 | 3.51E-03 |
| cg27472032 | 15 | 42500601  | TSS200                    | <i>VPS39</i>      | -4.426±0.468 | -4.838±0.51  | 1.34E-04 |
| cg23983173 | 15 | 42564634  | GeneBody/1st intron       | <i>TMEM87A</i>    | -2.503±0.299 | -2.694±0.366 | 5.09E-03 |
| cg26052367 | 15 | 42566151  | TSS1500                   | <i>GANC</i>       | -4.328±0.316 | -4.67±0.453  | 2.05E-05 |
| cg19170321 | 15 | 42640316  | GeneBody                  | <i>GANC</i>       | 2.363±0.214  | 2.493±0.24   | 6.77E-03 |
| cg02126638 | 15 | 42840787  | GeneBody/5'UTR/1st intron | <i>LRRC57</i>     | -5.114±0.372 | -5.573±0.506 | 1.79E-06 |
| cg09296044 | 15 | 43477606  | GeneBody/1st exon         | <i>CCNDBP1</i>    | -5.138±0.671 | -5.734±0.623 | 8.42E-05 |
| cg26918442 | 15 | 43622840  | TSS200                    | <i>LCMT2</i>      | -5.68±0.545  | -6.192±0.542 | 4.71E-05 |

|             |    |          |                           |            |              |              |          |
|-------------|----|----------|---------------------------|------------|--------------|--------------|----------|
| cg27015174  | 15 | 43622946 | GeneBody/5'UTR/1st exon   | ADAL       | -5.204±0.573 | -5.652±0.529 | 4.02E-04 |
| cg12784172  | 15 | 43661957 | GeneBody/1st exon         | ZSCAN29    | 3.053±0.173  | 3.17±0.194   | 2.52E-03 |
| cg12032620  | 15 | 43802735 | TSS200                    | TP53BP1    | -4.891±0.523 | -5.426±0.652 | 2.54E-05 |
| cg09020461  | 15 | 43802885 | TSS200                    | TP53BP1    | -5.464±0.489 | -5.778±0.36  | 2.18E-03 |
| cg03533811  | 15 | 43878085 | TSS1500                   | PIIP5K1    | 4.534±0.336  | 4.899±0.35   | 5.91E-06 |
| cg06813842  | 15 | 43910131 | GeneBody                  | STRC       | 0.411±0.126  | 0.502±0.176  | 2.59E-03 |
| cg12737574  | 15 | 44038332 | GeneBody/1st exon         | CATSPER2P1 | -3.352±0.409 | -3.093±0.539 | 6.72E-03 |
| cg23790767  | 15 | 44069451 | GeneBody/5'UTR/1st exon   | ELL3       | -5.91±0.466  | -6.351±0.514 | 5.38E-05 |
| cg24323434  | 15 | 44084878 | GeneBody/5'UTR/1st intron | SERF2      | -5.021±0.47  | -5.349±0.539 | 2.03E-03 |
| cg16267059  | 15 | 44117132 | TSS200                    | MFAP1      | -3.758±0.497 | -4.071±0.542 | 4.59E-03 |
| cg17935677  | 15 | 44119062 | TSS200                    | WDR76      | -5.602±0.567 | -5.974±0.522 | 2.38E-03 |
| cg18592307  | 15 | 44119432 | GeneBody/1st intron       | WDR76      | -4.451±0.354 | -4.796±0.495 | 8.16E-05 |
| cg27649764  | 15 | 44719030 | TSS1500                   | CTDSPL2    | -5.264±0.519 | -5.61±0.537  | 2.49E-03 |
| cg10891025  | 15 | 44828937 | GeneBody/1st intron       | EIF3J-AS1  | -4.612±0.402 | -4.955±0.443 | 2.08E-04 |
| cg22831263  | 15 | 44955512 | GeneBody/1st intron       | SPG11      | -4.527±0.488 | -4.849±0.466 | 2.32E-03 |
| cg06121469  | 15 | 44956098 | TSS1500                   | SPG11      | -3.897±0.369 | -4.193±0.381 | 3.78E-04 |
| cg03355298  | 15 | 45003704 | GeneBody/5'UTR/1st exon   | B2M        | -5.983±0.572 | -6.457±0.601 | 2.63E-04 |
| cg20543571  | 15 | 45248878 | TSS200                    | C15orf43   | 2.968±0.171  | 3.175±0.273  | 5.99E-06 |
| cg00877887  | 15 | 45406654 | GeneBody/5'UTR/1st exon   | DUOXA2     | -4.089±0.311 | -4.301±0.417 | 3.77E-03 |
| cg04001842  | 15 | 45406939 | GeneBody/1st exon         | DUOXA2     | -3.903±0.335 | -4.177±0.44  | 5.82E-04 |
| cg21132104  | 15 | 45694354 | TSS200                    | SPATA5L1   | -4.185±0.648 | -4.71±0.5    | 2.02E-04 |
| cg05695927  | 15 | 45694626 | GeneBody/5'UTR/1st exon   | SPATA5L1   | -3.586±1.09  | -4.222±1.018 | 6.51E-03 |
| cg07243932  | 15 | 45814527 | GeneBody                  | SLC30A4    | -5.791±0.575 | -6.216±0.475 | 6.23E-04 |
| cg08027001  | 15 | 45815269 | TSS1500                   | SLC30A4    | -5.097±0.408 | -5.327±0.388 | 8.60E-03 |
| cg03079549  | 15 | 45879223 | TSS200                    | BLOC1S6    | -5.352±0.436 | -6.042±0.656 | 2.17E-08 |
| cg09593286  | 15 | 45926878 | TSS200                    | SQRDL      | -3.937±0.289 | -4.184±0.304 | 1.83E-04 |
| cg17428950  | 15 | 45927554 | GeneBody/5'UTR/1st intron | SQRDL      | -5.108±0.407 | -5.421±0.406 | 5.56E-04 |
| cg21229859  | 15 | 48469952 | GeneBody/1st intron       | MYEF2      | -3.881±0.299 | -4.077±0.328 | 3.25E-03 |
| cg14930674  | 15 | 48500240 | GeneBody                  | SLC12A1    | 2.302±0.224  | 2.473±0.305  | 1.40E-03 |
| cg16016951  | 15 | 48624163 | TSS1500                   | DUT        | -5.385±0.621 | -6.014±0.632 | 1.62E-05 |
| cg16711185  | 15 | 49255875 | TSS1500                   | SHC4       | -4.257±0.492 | -4.585±0.413 | 1.80E-03 |
| cg14317651  | 15 | 49448126 | GeneBody/5'UTR/1st exon   | GALK2      | -4.595±0.371 | -4.954±0.509 | 8.47E-05 |
| cg22369818  | 15 | 50647822 | TSS1500                   | GABPB1     | -5.143±0.437 | -5.45±0.467  | 1.64E-03 |
| cg19911362  | 15 | 50716322 | TSS1500                   | USP8       | -4.283±0.438 | -4.64±0.411  | 2.59E-04 |
| cg01443067  | 15 | 50716755 | GeneBody/5'UTR/1st exon   | USP8       | -4.865±0.45  | -5.283±0.531 | 8.47E-05 |
| cg15683743  | 15 | 51057417 | GeneBody/1st intron       | SPPL2A     | -3.94±0.63   | -4.607±0.681 | 9.93E-06 |
| cg13501507  | 15 | 51915413 | TSS1500                   | DMXL2      | -4.835±0.412 | -5.341±0.516 | 1.39E-06 |
| cg16695354  | 15 | 52030164 | GeneBody/5'UTR/1st exon   | LYSMD2     | -4.361±0.628 | -4.89±0.544  | 1.50E-04 |
| cg16275172  | 15 | 52121933 | GeneBody/5'UTR/1st exon   | TMOD3      | -5.658±0.374 | -5.926±0.448 | 1.79E-03 |
| cg17676096  | 15 | 52263839 | GeneBody/1st intron       | LEO1       | -5.481±0.522 | -5.808±0.544 | 4.34E-03 |
| cg10074949  | 15 | 52312166 | GeneBody/5'UTR/1st intron | MAPK6      | -4.452±0.566 | -4.819±0.604 | 3.41E-03 |
| cg23287547  | 15 | 52820479 | GeneBody/1st intron       | MYO5A      | -4.43±0.348  | -4.643±0.418 | 7.24E-03 |
| cg05523085  | 15 | 52821854 | TSS1500                   | MYO5A      | -4.438±0.362 | -4.834±0.551 | 2.25E-05 |
| cg23865067  | 15 | 52860622 | GeneBody/1st intron       | ARPP19     | -4.187±0.22  | -4.421±0.256 | 1.19E-05 |
| cg25003924  | 15 | 52861754 | TSS1500                   | ARPP19     | 2.384±0.27   | 2.598±0.377  | 9.82E-04 |
| cg06720956  | 15 | 53082145 | GeneBody/5'UTR/1st exon   | ONECUT1    | -4.196±0.343 | -4.505±0.554 | 4.54E-04 |
| cg15628498  | 15 | 53082902 | TSS1500                   | ONECUT1    | -5.907±0.547 | -6.22±0.508  | 7.58E-03 |
| cg03878377  | 15 | 55489120 | GeneBody/5'UTR/1st exon   | RSL24D1    | -5.156±0.385 | -5.587±0.514 | 8.35E-06 |
| cg08233088  | 15 | 55489563 | TSS1500                   | RSL24D1    | -4.435±0.562 | -4.899±0.542 | 2.34E-04 |
| cg05761032  | 15 | 55700743 | GeneBody/5'UTR/1st exon   | C15orf65   | -4.6±0.334   | -4.914±0.509 | 1.97E-04 |
| cg09498379  | 15 | 56285741 | GeneBody/1st exon         | NEDD4      | -6.62±0.565  | -7.129±0.605 | 9.83E-05 |
| cg05964373  | 15 | 56657478 | TSS200                    | TEX9       | -4.233±0.407 | -4.484±0.368 | 4.00E-03 |
| cg07084709  | 15 | 57883511 | TSS1500                   | MYZAP      | 3.129±0.461  | 3.396±0.461  | 7.63E-03 |
| cg16391792  | 15 | 58723657 | TSS1500                   | LIPC       | 0.9±0.224    | 1.069±0.352  | 2.54E-03 |
| cg22727416  | 15 | 59041689 | GeneBody/1st exon         | ADAM10     | -4.436±0.248 | -4.642±0.46  | 2.06E-03 |
| cg06253734  | 15 | 59042325 | TSS200                    | ADAM10     | -4.564±0.329 | -4.876±0.462 | 1.21E-04 |
| cg05983247  | 15 | 59225658 | GeneBody/1st exon         | SLTM       | -6.179±0.527 | -6.503±0.607 | 6.13E-03 |
| cg03846288  | 15 | 59279849 | TSS200                    | RNF111     | -3.985±0.392 | -4.282±0.593 | 2.19E-03 |
| cg06307422  | 15 | 59279994 | GeneBody/5'UTR/1st exon   | RNF111     | -5.079±0.379 | -5.555±0.467 | 8.84E-07 |
| cg17260725  | 15 | 59397288 | GeneBody/5'UTR/1st exon   | CCNB2      | -4.805±0.593 | -5.188±0.552 | 2.80E-03 |
| cg13917394  | 15 | 59397341 | GeneBody/5'UTR/1st exon   | CCNB2      | -5.292±0.437 | -5.848±0.61  | 1.20E-06 |
| cg24088751  | 15 | 59949482 | GeneBody/5'UTR/1st intron | GTF2A2     | -4.332±0.333 | -4.598±0.377 | 4.95E-04 |
| cg17563769  | 15 | 59949922 | TSS200                    | GTF2A2     | -3.863±0.598 | -4.204±0.643 | 9.68E-03 |
| cg11939047  | 15 | 60771213 | GeneBody/5'UTR/1st exon   | NARG2      | -5.732±0.679 | -6.201±0.577 | 1.29E-03 |
| cg13804457  | 15 | 60771615 | TSS1500                   | NARG2      | -4.25±0.385  | -4.568±0.437 | 3.41E-04 |
| cg27167601  | 15 | 61521923 | TSS1500                   | RORA       | -3.586±0.298 | -3.802±0.455 | 3.35E-03 |
| cg13959611  | 15 | 62352550 | GeneBody/1st exon         | VPS13C     | -4.417±0.392 | -4.694±0.406 | 1.45E-03 |
| cg07525445  | 15 | 63335302 | GeneBody/1st intron       | TPM1       | -4.169±0.439 | -4.423±0.447 | 7.89E-03 |
| cg25808839  | 15 | 63414067 | GeneBody/5'UTR/1st exon   | LACTB      | -5.518±0.715 | -6.142±0.717 | 1.25E-04 |
| cg17556578  | 15 | 63481415 | TSS1500                   | RAB8B      | -5.646±0.61  | -6.208±0.655 | 7.24E-05 |
| cg23311628  | 15 | 63481868 | GeneBody/1st exon         | RAB8B      | -5.615±0.393 | -6.07±0.686  | 2.23E-05 |
| cg13401987  | 15 | 63569418 | TSS1500                   | APH1B      | -6.116±0.589 | -6.539±0.518 | 9.27E-04 |
| cg18846362  | 15 | 63674159 | TSS200                    | CA12       | -4.767±0.436 | -5.063±0.376 | 1.58E-03 |
| cg25985437  | 15 | 64386321 | TSS200                    | FAM96A     | -5.503±0.466 | -5.805±0.428 | 2.60E-03 |
| cg01176271  | 15 | 64388259 | GeneBody/1st exon         | SNX1       | -5.379±0.603 | -5.854±0.66  | 5.42E-04 |
| cg00810473  | 15 | 64443709 | TSS1500                   | SNX22      | -4.674±0.359 | -4.975±0.466 | 4.34E-04 |
| cg16312647  | 15 | 64455677 | TSS1500                   | PPIB       | -4.628±0.355 | -5.143±0.518 | 1.24E-07 |
| cg01021485  | 15 | 64648224 | GeneBody/5'UTR/1st exon   | C5orf11    | -5.82±0.598  | -6.367±0.512 | 5.11E-05 |
| cg11823654  | 15 | 65117936 | TSS200                    | PIF1       | -4.495±0.395 | -4.842±0.595 | 4.28E-04 |
| cg25829226  | 15 | 65134451 | GeneBody/1st intron       | PLEKHO2    | -3.816±0.341 | -3.593±0.368 | 3.26E-03 |
| cg241110916 | 15 | 65282490 | TSS1500                   | SPG21      | -5.019±0.494 | -5.373±0.496 | 1.21E-03 |
| cg16029760  | 15 | 65341902 | GeneBody/5'UTR/1st intron | SLC51B     | -3.265±0.338 | -3.468±0.417 | 8.52E-03 |
| cg09325101  | 15 | 65342522 | GeneBody                  | SLC51B     | -1.008±0.265 | -1.188±0.307 | 2.69E-03 |
| cg25026754  | 15 | 65426128 | GeneBody/5'UTR/1st exon   | PDCD7      | -4.76±0.355  | -5.031±0.469 | 1.27E-03 |
| cg23323879  | 15 | 65504534 | TSS1500                   | CILP       | 2.189±0.164  | 2.312±0.239  | 2.03E-03 |
| cg11718315  | 15 | 65579480 | TSS1500                   | PARP16     | -3.34±0.356  | -3.639±0.512 | 6.17E-04 |
| cg13704548  | 15 | 65714817 | GeneBody/1st intron       | IGDCC4     | -2.657±0.528 | -3.116±0.673 | 2.57E-04 |
| cg22794078  | 15 | 65904012 | TSS1500                   | VWA9       | -3.718±0.399 | -3.998±0.509 | 2.56E-03 |
| cg08291539  | 15 | 66084447 | GeneBody/5'UTR/1st exon   | DENND4A    | -5.629±0.604 | -6.13±0.617  | 2.51E-04 |
| cg16701105  | 15 | 66084815 | TSS200                    | DENND4A    | -5.036±0.528 | -5.384±0.575 | 3.10E-03 |
| cg15125634  | 15 | 66161842 | GeneBody/5'UTR/1st exon   | RAB11A     | -4.475±0.588 | -5.045±0.654 | 3.99E-05 |
| cg07098866  | 15 | 66545699 | GeneBody/5'UTR/1st intron | MEGF11     | -5.143±0.413 | -5.434±0.441 | 1.63E-03 |
| cg26416466  | 15 | 66546708 | TSS1500                   | MEGF11     | -2.979±0.408 | -3.26±0.511  | 2.91E-03 |
| cg12623088  | 15 | 66585521 | TSS200                    | DIS3L      | -3.845±0.42  | -4.102±0.469 | 6.03E-03 |
| cg13133148  | 15 | 66790044 | GeneBody/1st exon         | SNAPC5     | -5.589±0.418 | -5.877±0.407 | 1.65E-03 |

|             |    |          |                           |           |              |              |          |
|-------------|----|----------|---------------------------|-----------|--------------|--------------|----------|
| cg16330965  | 15 | 66790390 | TSS1500                   | SNAPC5    | -0.316±0.297 | -0.042±0.353 | 9.38E-05 |
| cg11136251  | 15 | 66797427 | TSS200                    | ZWILCH    | -4.575±0.303 | -4.755±0.355 | 8.55E-03 |
| cg18864581  | 15 | 66797614 | GeneBody/5'UTR/1st exon   | ZWILCH    | -3.555±0.387 | -3.884±0.645 | 1.01E-03 |
| cg15166050  | 15 | 66857133 | GeneBody                  | LCTL      | 3.457±0.289  | 3.664±0.3    | 1.26E-03 |
| cg21973276  | 15 | 66994600 | TSS200                    | SMAD6     | -4.535±0.397 | -4.859±0.396 | 2.86E-04 |
| cg14556189  | 15 | 67358639 | GeneBody/1st exon         | SMAD3     | -5.599±0.477 | -5.894±0.54  | 5.81E-03 |
| cg12246527  | 15 | 67834730 | TSS1500                   | MAP2K5    | -4.45±0.413  | -4.851±0.483 | 4.64E-05 |
| cg09272869  | 15 | 68569991 | TSS200                    | FEM1B     | -4.665±0.291 | -4.863±0.324 | 2.46E-03 |
| cg25159539  | 15 | 68570818 | GeneBody/1st exon         | FEM1B     | -4.794±0.351 | -5.053±0.343 | 8.33E-04 |
| cg19836283  | 15 | 68724690 | TSS200                    | ITGA11    | -3.695±0.303 | -3.942±0.488 | 1.31E-03 |
| cg06188683  | 15 | 69113451 | TSS200                    | ANP32A    | -5.629±0.57  | -6.077±0.593 | 4.88E-04 |
| cg05749577  | 15 | 69706710 | GeneBody/5'UTR/1st exon   | KIF23     | -5.7±0.583   | -6.108±0.562 | 1.38E-03 |
| cg09656405  | 15 | 69745057 | TSS200                    | RPLP1     | -5.496±0.453 | -5.872±0.423 | 2.05E-04 |
| cg24283842  | 15 | 69745592 | GeneBody/1st intron       | RPLP1     | -5.132±0.492 | -5.412±0.487 | 8.54E-03 |
| cg13637733  | 15 | 70390233 | GeneBody/5'UTR/1st exon   | TLE3      | -4.38±0.279  | -4.57±0.386  | 4.11E-03 |
| cg15025769  | 15 | 72410003 | GeneBody/5'UTR/1st intron | MYO9A     | -5.857±0.474 | -6.289±0.569 | 1.14E-04 |
| cg02169446  | 15 | 72410194 | GeneBody/5'UTR/1st exon   | MYO9A     | -5.392±0.588 | -5.797±0.583 | 1.74E-03 |
| cg16778903  | 15 | 72612567 | TSS200                    | CELF6     | -4.129±0.422 | -4.562±0.42  | 1.26E-05 |
| cg27079104  | 15 | 72668657 | TSS200                    | HEXA      | -4.949±0.359 | -5.177±0.322 | 3.09E-03 |
| cg05697231  | 15 | 74286614 | GeneBody/5'UTR/1st intron | STOML1    | -3.478±0.244 | -3.666±0.323 | 1.15E-03 |
| cg06285340  | 15 | 74659901 | GeneBody/1st exon         | CYP11A1   | 2.413±0.276  | 2.589±0.426  | 9.87E-03 |
| cg14443380  | 15 | 74725882 | GeneBody/5'UTR/1st intron | SEMA7A    | -5.155±0.559 | -5.548±0.445 | 1.02E-03 |
| cg00964109  | 15 | 74753785 | GeneBody/1st exon         | UBL7-AS1  | -5.335±0.584 | -5.829±0.505 | 1.42E-04 |
| cg02299279  | 15 | 74753787 | GeneBody/1st exon         | UBL7-AS1  | -6.079±0.726 | -6.728±0.651 | 7.44E-05 |
| cg19187486  | 15 | 74833838 | GeneBody/5'UTR/1st intron | ARID3B    | -5.275±0.338 | -5.479±0.341 | 5.55E-03 |
| cg19510604  | 15 | 74901076 | GeneBody/5'UTR/1st intron | CLK3      | 2.12±0.205   | 2.274±0.177  | 5.80E-04 |
| cg22527415  | 15 | 74988357 | GeneBody/5'UTR/1st exon   | EDC3      | -3.517±0.44  | -3.966±0.565 | 3.02E-05 |
| cg22657536  | 15 | 74988951 | TSS1500                   | EDC3      | -3.942±0.599 | -4.457±0.587 | 1.42E-04 |
| cg19817399  | 15 | 75018674 | TSS1500                   | CYP1A1    | -3.925±0.213 | -4.134±0.394 | 3.29E-04 |
| cg22290566  | 15 | 75105286 | GeneBody/1st exon         | LMAN1L    | 1.872±0.243  | 2.052±0.289  | 1.26E-03 |
| cg18502522  | 15 | 75165624 | GeneBody/5'UTR/1st exon   | SCAMP2    | -5.232±0.527 | -5.53±0.544  | 9.63E-03 |
| cg04249030  | 15 | 75230004 | GeneBody/1st intron       | COX5A     | -5.865±0.544 | -6.194±0.48  | 4.64E-03 |
| cg12478809  | 15 | 75230753 | TSS1500                   | COX5A     | -4.543±0.424 | -4.828±0.477 | 2.77E-03 |
| cg11632617  | 15 | 75315747 | TSS200                    | PPCDC     | -3.069±0.247 | -3.281±0.339 | 3.96E-04 |
| cg14209569  | 15 | 75628553 | GeneBody/1st intron       | COMMD4    | -4.816±0.451 | -5.209±0.55  | 2.08E-04 |
| cg25985103  | 15 | 75660389 | GeneBody                  | MAN2C1    | -2.647±0.351 | -3.003±0.452 | 3.36E-05 |
| cg15809230  | 15 | 75743753 | GeneBody/5'UTR/1st exon   | SIN3A     | -5.25±0.704  | -5.855±0.656 | 1.33E-04 |
| cg13794888  | 15 | 75917792 | GeneBody/5'UTR/1st intron | SNUPN     | -4.126±0.252 | -4.299±0.237 | 1.62E-03 |
| cg25429010  | 15 | 75932582 | GeneBody/5'UTR/1st exon   | IMP3      | -5.101±0.377 | -5.38±0.387  | 8.90E-04 |
| cg02357725  | 15 | 75932598 | GeneBody/5'UTR/1st exon   | IMP3      | -4.372±0.325 | -4.598±0.426 | 3.07E-03 |
| cg13044277  | 15 | 76304546 | GeneBody/5'UTR/1st intron | NRG4      | -1.649±0.367 | -1.885±0.439 | 6.15E-03 |
| cg23484278  | 15 | 76351548 | TSS1500                   | C15orf27  | -3.899±0.413 | -4.142±0.498 | 9.54E-03 |
| cg27321979  | 15 | 76352532 | GeneBody/5'UTR/1st intron | C15orf27  | -3.616±0.199 | -3.733±0.234 | 9.18E-03 |
| cg21250577  | 15 | 76603657 | GeneBody/1st intron       | ETFA      | -4.361±0.353 | -4.668±0.524 | 4.62E-04 |
| cg16862838  | 15 | 77224587 | GeneBody/1st intron       | RCN2      | -4.044±0.334 | -4.301±0.302 | 4.84E-04 |
| cg05922972  | 15 | 77362853 | GeneBody/1st intron       | TSPAN3    | -5.347±0.541 | -5.763±0.547 | 5.76E-04 |
| cg11876919  | 15 | 77713622 | GeneBody/5'UTR/1st intron | HMG20A    | -4.506±0.327 | -4.758±0.346 | 6.38E-04 |
| cg24449371  | 15 | 78424141 | TSS1500                   | CIB2      | -5.076±0.577 | -5.445±0.522 | 2.98E-03 |
| cg26190136  | 15 | 78441442 | TSS1500                   | IDH3A     | -3.811±0.469 | -4.18±0.532  | 5.88E-04 |
| cg21223368  | 15 | 78441812 | GeneBody/1st intron       | IDH3A     | -5.359±0.51  | -5.671±0.528 | 5.22E-03 |
| cg07061145  | 15 | 78556178 | TSS1500                   | DNAJA4    | 2.112±0.253  | 2.324±0.309  | 3.69E-04 |
| cg25229015  | 15 | 78591883 | GeneBody/5'UTR/1st intron | WDR61     | -5.062±0.341 | -5.388±0.514 | 1.54E-04 |
| cg15563993  | 15 | 78592154 | TSS1500                   | WDR61     | -4.871±0.425 | -5.251±0.512 | 1.52E-04 |
| cg23337754  | 15 | 78632859 | GeneBody/1st intron       | CRABP1    | -4.299±0.445 | -4.681±0.462 | 1.66E-04 |
| cg171133183 | 15 | 78632861 | GeneBody/1st intron       | CRABP1    | -4.774±0.72  | -5.298±0.578 | 7.14E-04 |
| cg24709471  | 15 | 78633202 | GeneBody/1st intron       | CRABP1    | -2.35±0.18   | -2.481±0.249 | 2.30E-03 |
| cg22916109  | 15 | 78730334 | TSS200                    | IREB2     | -5.597±0.564 | -6.108±0.614 | 9.32E-05 |
| cg26674929  | 15 | 78730741 | GeneBody/1st intron       | IREB2     | -5.984±0.44  | -6.44±0.579  | 2.73E-05 |
| cg22563815  | 15 | 78856949 | TSS1500                   | CHRNA5    | 0.025±0.238  | 0.182±0.271  | 3.26E-03 |
| cg21402071  | 15 | 78933902 | TSS1500                   | CHRNA5    | -1.696±0.291 | -1.869±0.319 | 7.29E-03 |
| cg23727043  | 15 | 79104124 | TSS1500                   | ADAMTS7   | -3.068±0.256 | -3.285±0.349 | 4.55E-04 |
| cg06746101  | 15 | 79603771 | GeneBody/1st intron       | TMED3     | -5.278±0.38  | -5.554±0.412 | 1.22E-03 |
| cg10829134  | 15 | 80352620 | GeneBody/5'UTR/1st intron | ZFAND6    | -5.687±0.471 | -6.21±0.47   | 3.83E-06 |
| cg07699440  | 15 | 80445357 | GeneBody/5'UTR/1st exon   | FAH       | -5.307±0.411 | -5.766±0.564 | 9.90E-06 |
| cg17718210  | 15 | 81293605 | GeneBody/5'UTR/1st exon   | MESDC1    | -5.494±0.491 | -5.868±0.58  | 9.25E-04 |
| cg24817430  | 15 | 81294299 | GeneBody/5'UTR/1st exon   | MESDC1    | -5.087±0.484 | -5.386±0.573 | 6.31E-03 |
| cg00950621  | 15 | 81616341 | GeneBody/1st exon         | STAR5D    | -4.712±0.347 | -4.925±0.425 | 7.03E-03 |
| cg01578341  | 15 | 82338527 | TSS200                    | MEX3B     | -4.101±0.603 | -4.479±0.575 | 3.74E-03 |
| cg08757531  | 15 | 83654895 | TSS200                    | FAM103A1  | -4.997±0.37  | -5.547±0.508 | 5.92E-08 |
| cg12435359  | 15 | 83735668 | TSS1500                   | MIR4515   | -5.996±0.568 | -6.532±0.613 | 5.25E-05 |
| cg16958189  | 15 | 83736204 | TSS200                    | BTBD1     | -4.008±0.263 | -4.263±0.411 | 1.45E-04 |
| cg17018527  | 15 | 83775931 | TSS1500                   | TM6SF1    | -4.186±0.324 | -4.533±0.395 | 1.20E-05 |
| cg07639720  | 15 | 83952875 | GeneBody/1st intron       | BNC1      | -3.547±0.305 | -3.841±0.443 | 1.12E-04 |
| cg01003992  | 15 | 84898831 | GeneBody/1st exon         | LOC388152 | -4.187±0.616 | -4.632±0.733 | 1.64E-03 |
| cg01173291  | 15 | 85144040 | TSS1500                   | ZSCAN2    | -5.237±0.352 | -5.522±0.346 | 2.99E-04 |
| cg05905876  | 15 | 85259824 | TSS200                    | SEC11A    | -5.572±0.678 | -6.005±0.692 | 3.61E-03 |
| cg23838179  | 15 | 85291191 | TSS1500                   | ZNF592    | -5.244±0.443 | -5.585±0.415 | 4.98E-04 |
| cg02913089  | 15 | 85525744 | GeneBody/1st intron       | PDE8A     | -4.586±0.465 | -4.882±0.57  | 5.30E-03 |
| cg08211967  | 15 | 85923708 | TSS200                    | AKAP13    | -4.582±0.251 | -4.848±0.351 | 2.62E-05 |
| cg05421555  | 15 | 85924342 | GeneBody/5'UTR/1st intron | AKAP13    | -4.964±0.451 | -5.279±0.479 | 1.72E-03 |
| cg00256166  | 15 | 86338428 | TSS1500                   | KLHL25    | -4.205±0.259 | -4.415±0.396 | 1.14E-03 |
| cg26232187  | 15 | 88799300 | GeneBody                  | NTRK3     | -5.477±0.374 | -5.872±0.581 | 4.42E-05 |
| cg15257765  | 15 | 89010459 | GeneBody/1st exon         | MRPL46    | -4.567±0.232 | -4.759±0.275 | 3.67E-04 |
| cg03872267  | 15 | 89011204 | GeneBody                  | MRPS11    | -5.031±0.459 | -5.415±0.398 | 1.62E-04 |
| cg18230771  | 15 | 89347176 | GeneBody/5'UTR/1st intron | ACAN      | -4.392±0.468 | -4.708±0.507 | 2.48E-03 |
| cg08348496  | 15 | 89438671 | GeneBody/5'UTR/1st intron | HAPLN3    | -5.48±0.593  | -5.882±0.586 | 1.99E-03 |
| cg25523753  | 15 | 89631191 | TSS200                    | ABHD2     | -3.477±0.436 | -3.797±0.526 | 1.44E-03 |
| cg21273125  | 15 | 89631790 | GeneBody/5'UTR/1st exon   | ABHD2     | -4.197±0.414 | -4.441±0.356 | 5.48E-03 |
| cg05024638  | 15 | 89877539 | GeneBody/5'UTR/1st intron | POLG      | -5.444±0.453 | -5.716±0.451 | 5.73E-03 |
| cg22187094  | 15 | 89878452 | TSS1500                   | POLG      | -5.27±0.607  | -5.632±0.509 | 4.75E-03 |
| cg17732044  | 15 | 90234207 | GeneBody/5'UTR/1st intron | WDR93     | -4.706±0.46  | -5.169±0.471 | 1.83E-05 |
| cg11468711  | 15 | 90545745 | GeneBody/5'UTR/1st intron | ZNF710    | -5.449±0.482 | -5.9±0.547   | 7.70E-05 |
| cg05641961  | 15 | 90776927 | GeneBody                  | CIB1      | -4.986±0.338 | -5.339±0.547 | 6.34E-05 |
| cg23979923  | 15 | 90777592 | GeneBody/5'UTR/1st intron | GDPGP1    | -4.603±0.317 | -5.104±0.477 | 2.25E-08 |
| cg07364638  | 15 | 90808673 | TSS1500                   | NGRN      | -5.197±0.445 | -5.657±0.611 | 3.24E-05 |

|            |    |           |                           |                  |              |              |          |
|------------|----|-----------|---------------------------|------------------|--------------|--------------|----------|
| cg17891123 | 15 | 90931113  | TSS1500                   | <i>IQGAP1</i>    | -1.93±0.162  | -2.073±0.227 | 2.94E-04 |
| cg10978402 | 15 | 90931990  | GeneBody/1st intron       | <i>IQGAP1</i>    | -5.905±0.539 | -6.36±0.479  | 1.53E-04 |
| cg07973395 | 15 | 91260024  | TSS1500                   | <i>BLM</i>       | -4.535±0.253 | -4.709±0.256 | 1.73E-03 |
| cg26377677 | 15 | 91412118  | GeneBody/5'UTR/1st intron | <i>FURIN</i>     | 1.639±0.24   | 1.849±0.326  | 3.01E-04 |
| cg12467864 | 15 | 91537971  | TSS200                    | <i>PRC1</i>      | -5.938±0.556 | -6.523±0.594 | 1.05E-05 |
| cg22017387 | 15 | 91565357  | GeneBody/1st intron       | <i>VPS33B</i>    | -4.509±0.211 | -4.679±0.246 | 4.66E-04 |
| cg25475171 | 15 | 91643132  | TSS200                    | <i>SV2B</i>      | -4.844±0.325 | -5.08±0.547  | 4.84E-03 |
| cg17338403 | 15 | 92395836  | TSS1500                   | <i>SLCO3A1</i>   | -2.257±0.232 | -2.473±0.348 | 2.07E-04 |
| cg08404227 | 15 | 92397279  | GeneBody/1st exon         | <i>SLCO3A1</i>   | -5.269±0.445 | -5.602±0.522 | 1.07E-03 |
| cg07766315 | 15 | 93198694  | GeneBody/1st exon         | <i>FAM174B</i>   | -4.626±0.669 | -5.289±0.646 | 2.05E-05 |
| cg01407341 | 15 | 97326798  | GeneBody/5'UTR/1st exon   | <i>SPATA8</i>    | 2.979±0.16   | 3.189±0.285  | 3.03E-06 |
| cg09149294 | 15 | 98503793  | TSS200                    | <i>ARRDC4</i>    | -4.969±0.399 | -5.388±0.61  | 4.31E-05 |
| cg14568338 | 15 | 99191797  | TSS1500                   | <i>IGF1R</i>     | -3.682±0.294 | -3.857±0.342 | 8.41E-03 |
| cg26677874 | 15 | 99791930  | GeneBody/5'UTR/1st intron | <i>LRRC28</i>    | -5.3±0.363   | -5.575±0.376 | 7.27E-04 |
| cg17886204 | 15 | 100346994 | GeneBody/1st intron       | <i>DNM1P46</i>   | -5.445±0.859 | -6.037±0.745 | 1.37E-03 |
| cg21359747 | 15 | 101420636 | GeneBody/1st intron       | <i>ALDH1A3</i>   | -3.491±0.422 | -3.823±0.494 | 6.46E-04 |
| cg07421682 | 15 | 102030850 | TSS1500                   | <i>PCSK6</i>     | 2.943±0.236  | 3.265±0.339  | 3.85E-07 |
| cg13634678 | 15 | 102192134 | GeneBody/1st intron       | <i>TM2D3</i>     | -4.357±0.344 | -4.597±0.565 | 5.94E-03 |
| cg02738763 | 15 | 102264749 | TSS200                    | <i>TARSL2</i>    | -5.108±0.378 | -5.383±0.56  | 2.94E-03 |
| cg11876012 | 16 | 101686    | GeneBody/1st intron       | <i>POLR3K</i>    | 2.014±0.233  | 2.163±0.284  | 5.01E-03 |
| cg11653271 | 16 | 103723    | TSS200                    | <i>POLR3K</i>    | -5.097±0.568 | -5.673±0.791 | 4.62E-05 |
| cg25425005 | 16 | 202905    | GeneBody/5'UTR/1st exon   | <i>HBZ</i>       | 2.675±0.208  | 2.941±0.274  | 8.90E-07 |
| cg01687051 | 16 | 278852    | GeneBody/1st intron       | <i>LUC7L</i>     | -4.413±0.317 | -4.839±0.48  | 7.38E-07 |
| cg26762198 | 16 | 284647    | TSS200                    | <i>ITFG3</i>     | -5.275±0.398 | -5.801±0.668 | 1.83E-06 |
| cg12197254 | 16 | 285158    | GeneBody/5'UTR/1st intron | <i>ITFG3</i>     | -4.128±0.287 | -4.429±0.375 | 2.06E-05 |
| cg01344518 | 16 | 326728    | TSS1500                   | <i>RGS11</i>     | 0.739±0.142  | 0.823±0.148  | 6.75E-03 |
| cg15755548 | 16 | 331050    | GeneBody/1st intron       | <i>ARHGDIG</i>   | -3.314±0.284 | -3.493±0.357 | 6.08E-03 |
| cg10805676 | 16 | 421990    | TSS1500                   | <i>MRPL28</i>    | 2.089±0.193  | 2.25±0.251   | 4.69E-04 |
| cg16245339 | 16 | 451507    | TSS1500                   | <i>DECR2</i>     | -5.024±0.485 | -5.303±0.464 | 7.68E-03 |
| cg13310628 | 16 | 576870    | GeneBody/1st exon         | <i>LINC00235</i> | -5.539±0.49  | -5.943±0.479 | 2.46E-04 |
| cg19977912 | 16 | 619814    | TSS200                    | <i>PIGQ</i>      | -4.884±0.562 | -5.185±0.398 | 9.34E-03 |
| cg03701222 | 16 | 639209    | TSS200                    | <i>RAB40C</i>    | -5.031±0.339 | -5.259±0.44  | 3.93E-03 |
| cg09305478 | 16 | 691988    | GeneBody/5'UTR/1st exon   | <i>FAM195A</i>   | -1.347±0.206 | -1.546±0.208 | 3.25E-05 |
| cg01352882 | 16 | 730130    | GeneBody/5'UTR/1st exon   | <i>STUB1</i>     | -5.09±0.581  | -5.589±0.538 | 1.32E-04 |
| cg16998213 | 16 | 765434    | GeneBody/1st intron       | <i>METRN</i>     | -5.577±0.732 | -6.174±0.707 | 2.67E-04 |
| cg16732880 | 16 | 791244    | TSS1500                   | <i>NARFL</i>     | -5.453±0.373 | -5.708±0.392 | 2.07E-03 |
| cg05873268 | 16 | 1290058   | TSS1500                   | <i>TPSAB1</i>    | 1.423±0.171  | 1.537±0.182  | 2.72E-03 |
| cg10960946 | 16 | 1359179   | GeneBody/5'UTR/1st exon   | <i>UBE2I</i>     | -6.053±0.577 | -6.688±0.556 | 4.13E-06 |
| cg16236759 | 16 | 1359182   | GeneBody/5'UTR/1st exon   | <i>UBE2I</i>     | -4.639±0.399 | -5.003±0.485 | 1.19E-04 |
| cg01979004 | 16 | 1401195   | GeneBody                  | <i>TSR3</i>      | -4.371±0.338 | -4.665±0.455 | 3.07E-04 |
| cg25459778 | 16 | 1664582   | TSS200                    | <i>CRAMP1L</i>   | -5.535±0.551 | -6.102±0.561 | 1.23E-05 |
| cg01723747 | 16 | 1727942   | TSS1500                   | <i>HN1L</i>      | -3.281±0.571 | -3.817±0.627 | 5.92E-05 |
| cg08708323 | 16 | 1728724   | GeneBody/1st intron       | <i>HN1L</i>      | -4.031±0.432 | -4.374±0.653 | 1.35E-03 |
| cg01100784 | 16 | 1756771   | GeneBody/1st intron       | <i>MAPK8IP3</i>  | -4.954±0.478 | -5.347±0.454 | 2.40E-04 |
| cg00485296 | 16 | 1821559   | GeneBody/5'UTR/1st exon   | <i>NME3</i>      | -5.878±0.672 | -6.302±0.922 | 7.70E-03 |
| cg01729862 | 16 | 1824041   | GeneBody                  | <i>EME2</i>      | -4.396±0.396 | -4.741±0.523 | 2.85E-04 |
| cg03700218 | 16 | 1832709   | TSS200                    | <i>SPSB3</i>     | -4.713±0.45  | -5.213±0.568 | 7.54E-06 |
| cg07909527 | 16 | 1833420   | GeneBody/1st intron       | <i>NUBP2</i>     | -6.377±0.707 | -6.921±0.629 | 4.52E-04 |
| cg01747665 | 16 | 1843424   | GeneBody/1st intron       | <i>IGFALS</i>    | 1.254±0.155  | 1.389±0.234  | 4.49E-04 |
| cg23048366 | 16 | 1876863   | GeneBody/5'UTR/1st exon   | <i>HAGH</i>      | -4.405±0.317 | -4.661±0.451 | 8.91E-04 |
| cg14074117 | 16 | 1909714   | GeneBody                  | <i>MEIOB</i>     | -0.597±0.26  | -0.431±0.317 | 5.22E-03 |
| cg26675934 | 16 | 2009675   | GeneBody/1st exon         | <i>NDUFB10</i>   | -5.716±0.578 | -6.076±0.658 | 5.49E-03 |
| cg23998987 | 16 | 2021791   | TSS1500                   | <i>TBL3</i>      | -4.603±0.393 | -5.046±0.67  | 2.85E-05 |
| cg14297700 | 16 | 2022287   | GeneBody/1st intron       | <i>TBL3</i>      | -5.34±0.482  | -5.732±0.639 | 6.42E-04 |
| cg00043004 | 16 | 2030892   | GeneBody                  | <i>NOXO1</i>     | -3.569±0.325 | -3.816±0.47  | 1.72E-03 |
| cg15643724 | 16 | 2034532   | GeneBody/1st intron       | <i>GFER</i>      | -3.958±0.217 | -4.231±0.364 | 4.12E-06 |
| cg26486663 | 16 | 2040863   | GeneBody/1st intron       | <i>SYNGR3</i>    | -3.732±0.235 | -3.88±0.246  | 4.20E-03 |
| cg05243909 | 16 | 2097910   | TSS200                    | <i>NTHL1</i>     | -4.493±0.316 | -4.306±0.38  | 8.98E-03 |
| cg27176536 | 16 | 2198395   | TSS1500                   | <i>RAB26</i>     | -1.957±0.151 | -2.088±0.254 | 8.06E-04 |
| cg20757196 | 16 | 2206320   | GeneBody/5'UTR/1st intron | <i>TRAF7</i>     | -4.81±0.336  | -5.043±0.327 | 1.54E-03 |
| cg04490516 | 16 | 2255169   | TSS200                    | <i>MLST8</i>     | -3.429±0.342 | -3.694±0.4   | 7.75E-04 |
| cg11395975 | 16 | 2255950   | GeneBody/5'UTR/1st intron | <i>MLST8</i>     | -4.907±0.504 | -5.343±0.446 | 1.11E-04 |
| cg09615982 | 16 | 2273300   | TSS1500                   | <i>E4F1</i>      | -4.97±0.488  | -5.418±0.453 | 5.53E-05 |
| cg05824432 | 16 | 2301222   | GeneBody                  | <i>ECI1</i>      | -5.354±0.381 | -5.744±0.533 | 4.24E-05 |
| cg20886062 | 16 | 2301787   | TSS200                    | <i>ECI1</i>      | -5.007±0.455 | -5.3±0.504   | 3.94E-03 |
| cg06728335 | 16 | 2318300   | GeneBody/5'UTR/1st exon   | <i>RNPS1</i>     | -5.165±0.458 | -5.426±0.459 | 8.68E-03 |
| cg06361108 | 16 | 2478781   | TSS1500                   | <i>CCNF</i>      | -5.403±0.425 | -5.712±0.55  | 1.89E-03 |
| cg06689536 | 16 | 2480094   | GeneBody/1st intron       | <i>CCNF</i>      | -4.631±0.277 | -5.045±0.449 | 1.29E-07 |
| cg07326074 | 16 | 2510388   | GeneBody                  | <i>C16orf59</i>  | -5.249±0.402 | -5.542±0.47  | 1.42E-03 |
| cg22721827 | 16 | 2520958   | TSS1500                   | <i>NTN3</i>      | -1.098±0.156 | -0.975±0.257 | 2.12E-03 |
| cg22536398 | 16 | 2521659   | GeneBody/5'UTR/1st exon   | <i>NTN3</i>      | -4.145±0.381 | -4.391±0.423 | 3.85E-03 |
| cg22499237 | 16 | 2587546   | TSS1500                   | <i>PDPK1</i>     | -4.345±0.324 | -4.683±0.492 | 4.71E-05 |
| cg01195053 | 16 | 2653274   | TSS200                    | <i>LOC652276</i> | -3.496±0.57  | -3.879±0.714 | 3.57E-03 |
| cg06736444 | 16 | 2801793   | TSS1500                   | <i>SRRM2</i>     | 0.905±0.209  | 1.037±0.301  | 8.84E-03 |
| cg07195622 | 16 | 2803408   | TSS1500                   | <i>SRRM2-AS1</i> | -3.939±0.283 | -4.306±0.398 | 8.80E-07 |
| cg06090630 | 16 | 2827139   | GeneBody/1st intron       | <i>TCEB2</i>     | -5.618±0.492 | -6.05±0.596  | 1.88E-04 |
| cg02718531 | 16 | 2932507   | TSS1500                   | <i>FLYWCH2</i>   | -4.461±0.262 | -4.693±0.403 | 4.52E-04 |
| cg13644052 | 16 | 3010410   | 0                         | 0                | 1.214±0.309  | 1.425±0.31   | 1.88E-03 |
| cg20712430 | 16 | 3013923   | TSS1500                   | <i>KREMEN2</i>   | -4.39±0.327  | -4.69±0.492  | 2.60E-04 |
| cg15460516 | 16 | 3070249   | TSS200                    | <i>TNFRSF12A</i> | -5.209±0.553 | -5.814±0.52  | 4.35E-06 |
| cg16657615 | 16 | 3070630   | GeneBody/1st intron       | <i>TNFRSF12A</i> | -3.953±0.213 | -4.148±0.391 | 7.38E-04 |
| cg01374047 | 16 | 3074170   | GeneBody/5'UTR/1st exon   | <i>HCFC1R1</i>   | -5.138±0.567 | -5.458±0.566 | 9.27E-03 |
| cg02062650 | 16 | 3074537   | TSS1500                   | <i>HCFC1R1</i>   | -3.863±0.346 | -4.13±0.407  | 8.11E-04 |
| cg26705553 | 16 | 3096711   | GeneBody/5'UTR/1st exon   | <i>MMP25</i>     | -4.494±0.329 | -4.8±0.476   | 1.77E-04 |
| cg01449415 | 16 | 3184811   | TSS1500                   | <i>ZNF213</i>    | -5.451±0.402 | -5.673±0.365 | 9.61E-03 |
| cg19703826 | 16 | 3185452   | GeneBody/5'UTR/1st intron | <i>ZNF213</i>    | -4.332±0.481 | -4.665±0.507 | 1.85E-03 |
| cg00861635 | 16 | 3285425   | GeneBody/5'UTR/1st exon   | <i>ZNF200</i>    | -4.231±0.364 | -4.612±0.324 | 7.74E-06 |
| cg17171916 | 16 | 3333486   | GeneBody/5'UTR/1st exon   | <i>ZNF263</i>    | -5.254±0.644 | -5.906±0.701 | 1.98E-05 |
| cg23412875 | 16 | 3333539   | GeneBody/5'UTR/1st exon   | <i>ZNF263</i>    | -5.042±0.454 | -5.376±0.648 | 2.28E-03 |
| cg11720778 | 16 | 3351073   | GeneBody/5'UTR            | <i>TIGD7</i>     | 2.72±0.221   | 2.848±0.205  | 7.08E-03 |
| cg13919607 | 16 | 3451181   | TSS200                    | <i>ZNF174</i>    | -5.018±0.319 | -5.499±0.517 | 1.15E-07 |
| cg04211818 | 16 | 3661492   | GeneBody/5'UTR/1st intron | <i>SLX4</i>      | -5.554±0.379 | -6.048±0.566 | 1.12E-06 |
| cg06529761 | 16 | 3702486   | TSS1500                   | <i>DNASE1</i>    | 1.712±0.198  | 1.885±0.228  | 1.84E-04 |
| cg10609615 | 16 | 3766942   | GeneBody/1st intron       | <i>TRAP1</i>     | -4.451±0.465 | -4.848±0.511 | 2.04E-04 |
| cg13856728 | 16 | 3930086   | GeneBody/5'UTR/1st exon   | <i>CREBBP</i>    | -5.47±0.575  | -5.808±0.498 | 5.68E-03 |

|            |    |          |                           |          |              |              |          |
|------------|----|----------|---------------------------|----------|--------------|--------------|----------|
| cg12645567 | 16 | 4322414  | GeneBody/1st intron       | TFAP4    | -5.033±0.38  | -5.46±0.529  | 9.40E-06 |
| cg10396357 | 16 | 4323326  | TSS1500                   | TFAP4    | -4.773±0.443 | -5.06±0.596  | 5.85E-03 |
| cg04629269 | 16 | 4401449  | TSS200                    | PAM16    | -4.967±0.525 | -5.368±0.708 | 1.34E-03 |
| cg00519627 | 16 | 4466650  | GeneBody/5'UTR/1st exon   | CORO7    | -5.538±0.552 | -6.18±0.648  | 2.77E-06 |
| cg22103999 | 16 | 4475555  | TSS1500                   | DNAJA3   | -4.953±0.454 | -5.217±0.422 | 6.65E-03 |
| cg15645784 | 16 | 4852962  | TSS200                    | ROGDI    | -5.376±0.546 | -5.862±0.604 | 1.22E-04 |
| cg01261535 | 16 | 4897216  | GeneBody/1st intron       | GLYR1    | -5.014±0.553 | -5.527±0.758 | 1.49E-04 |
| cg13516796 | 16 | 5122251  | GeneBody/1st intron       | ALG1     | -4.396±0.345 | -4.619±0.458 | 5.81E-03 |
| cg10957584 | 16 | 5148097  | TSS1500                   | FAM86A   | -5.046±0.539 | -5.436±0.599 | 1.34E-03 |
| cg03586879 | 16 | 6068831  | TSS1500                   | RBFOX1   | -3.595±0.353 | -3.836±0.464 | 3.51E-03 |
| cg20587543 | 16 | 8768110  | TSS1500                   | ABAT     | -4.291±0.322 | -4.602±0.403 | 5.84E-05 |
| cg05869585 | 16 | 8890233  | GeneBody                  | TMEM186  | 3.018±0.231  | 3.176±0.294  | 3.23E-03 |
| cg12529801 | 16 | 9184705  | TSS1500                   | C16orf72 | -5.048±0.367 | -5.36±0.484  | 3.96E-04 |
| cg21503093 | 16 | 10674468 | GeneBody/5'UTR/1st exon   | EMP2     | -5.156±0.563 | -5.524±0.703 | 4.56E-03 |
| cg18609562 | 16 | 10789701 | TSS1500                   | TEK75    | 1.606±0.326  | 1.787±0.279  | 8.42E-03 |
| cg01808090 | 16 | 10837891 | GeneBody                  | NUBP1    | -4.619±0.506 | -5±0.515     | 7.29E-04 |
| cg23970785 | 16 | 11036526 | TSS1500                   | DEXI     | -4.97±0.609  | -5.474±0.575 | 2.12E-04 |
| cg01717706 | 16 | 11349308 | GeneBody                  | SOC51    | -4.564±0.442 | -4.836±0.447 | 4.87E-03 |
| cg00487159 | 16 | 11349568 | GeneBody/5'UTR/1st intron | SOC51    | -4.645±0.321 | -4.84±0.408  | 8.28E-03 |
| cg06295404 | 16 | 11350337 | TSS1500                   | SOC51    | -3.614±0.361 | -3.894±0.579 | 2.13E-03 |
| cg24075743 | 16 | 11375385 | TSS200                    | PRM1     | 1.201±0.246  | 1.05±0.327   | 8.93E-03 |
| cg19346899 | 16 | 11439151 | TSS200                    | RMI2     | -4.704±0.661 | -5.109±0.701 | 5.51E-03 |
| cg08268266 | 16 | 11680284 | TSS200                    | LITAF    | -3.181±0.471 | -3.543±0.587 | 1.00E-03 |
| cg21426387 | 16 | 11762806 | GeneBody/5'UTR/1st intron | SNN      | -5.424±0.39  | -5.66±0.373  | 5.19E-03 |
| cg14959707 | 16 | 11876391 | GeneBody/5'UTR/1st intron | ZC3H7A   | 1.583±0.225  | 1.721±0.259  | 6.28E-03 |
| cg26521448 | 16 | 11876426 | GeneBody/5'UTR/1st intron | ZC3H7A   | 3.386±0.379  | 3.629±0.432  | 4.21E-03 |
| cg13908977 | 16 | 11945749 | TSS1500                   | RSL1D1   | -5.123±0.432 | -5.458±0.406 | 4.54E-04 |
| cg14129103 | 16 | 12609068 | GeneBody                  | SNX29    | 1.892±0.192  | 1.768±0.238  | 4.87E-03 |
| cg24091698 | 16 | 14013720 | TSS1500                   | ERCC4    | -3.901±0.46  | -4.355±0.564 | 4.31E-05 |
| cg10784067 | 16 | 14014435 | GeneBody/1st intron       | ERCC4    | -4.626±0.518 | -5.081±0.594 | 1.61E-04 |
| cg04066242 | 16 | 14727239 | GeneBody/5'UTR/1st intron | BFAR     | -4.758±0.461 | -5.09±0.464  | 1.12E-03 |
| cg14060060 | 16 | 15068476 | TSS1500                   | PDXDC1   | -4.674±0.337 | -5.024±0.473 | 3.39E-05 |
| cg06734828 | 16 | 15069433 | GeneBody/1st intron       | PDXDC1   | -5.446±0.295 | -5.674±0.313 | 5.98E-04 |
| cg22722802 | 16 | 15489542 | TSS200                    | MPV17L   | -4.007±0.488 | -4.487±0.578 | 3.90E-05 |
| cg26713220 | 16 | 15528565 | GeneBody/1st exon         | C16orf45 | -5.102±0.437 | -5.351±0.463 | 9.53E-03 |
| cg22178085 | 16 | 15736658 | GeneBody/5'UTR/1st intron | KIAA0430 | -4.997±0.415 | -5.311±0.329 | 4.71E-04 |
| cg22874960 | 16 | 15737314 | GeneBody/5'UTR/1st exon   | NDE1     | -4.217±0.292 | -4.481±0.514 | 6.54E-04 |
| cg21321885 | 16 | 15744194 | GeneBody/5'UTR/1st intron | NDE1     | -5.906±0.46  | -6.387±0.699 | 4.44E-05 |
| cg17880199 | 16 | 15950840 | GeneBody/5'UTR/1st exon   | MYH11    | -4.72±0.417  | -4.961±0.422 | 7.93E-03 |
| cg15488251 | 16 | 15951224 | TSS1500                   | MYH11    | -5±0.498     | -5.41±0.574  | 3.62E-04 |
| cg06490162 | 16 | 15982174 | GeneBody/1st intron       | FOPNL    | -5.053±0.392 | -5.333±0.308 | 8.49E-04 |
| cg17698643 | 16 | 15982631 | TSS200                    | FOPNL    | -5.65±0.476  | -5.938±0.51  | 6.15E-03 |
| cg21608192 | 16 | 17563827 | GeneBody/1st intron       | XYLT1    | -3.873±0.373 | -4.092±0.429 | 8.86E-03 |
| cg16299616 | 16 | 18573628 | TSS200                    | NOMO2    | -4.118±0.319 | -4.464±0.455 | 1.91E-05 |
| cg21024145 | 16 | 18801635 | GeneBody/5'UTR/1st exon   | RPS15A   | -5.404±0.51  | -5.704±0.503 | 6.66E-03 |
| cg07295034 | 16 | 18937261 | GeneBody/1st intron       | SMG1     | -4.25±0.36   | -4.641±0.425 | 8.62E-06 |
| cg21657816 | 16 | 19079446 | GeneBody/5'UTR/1st intron | COQ7     | -5.149±0.489 | -5.66±0.607  | 1.83E-05 |
| cg12454725 | 16 | 19179231 | TSS1500                   | SYT17    | -5.246±0.467 | -5.697±0.595 | 6.38E-05 |
| cg20047230 | 16 | 19535092 | TSS200                    | CCP110   | -2.999±0.51  | -2.447±0.725 | 1.88E-05 |
| cg21615663 | 16 | 19727911 | GeneBody/5'UTR/1st intron | IQCK     | 2.187±0.2    | 2.336±0.231  | 1.09E-03 |
| cg12398332 | 16 | 19895651 | GeneBody/5'UTR/1st intron | GPRC5B   | -3.874±0.51  | -4.173±0.556 | 7.90E-03 |
| cg04491443 | 16 | 20415966 | GeneBody/5'UTR/1st exon   | PDILT    | 3.381±0.192  | 3.589±0.301  | 3.09E-05 |
| cg21644826 | 16 | 20775352 | GeneBody/5'UTR/1st exon   | ACSM3    | -3.202±0.299 | -3.428±0.373 | 1.17E-03 |
| cg07314549 | 16 | 20817501 | TSS1500                   | LOC81691 | -4.395±0.302 | -4.767±0.441 | 2.66E-06 |
| cg06039624 | 16 | 20818068 | TSS1500                   | ERI2     | -5.197±0.556 | -5.596±0.577 | 1.26E-03 |
| cg26424013 | 16 | 20911827 | TSS1500                   | LYRM1    | -6.334±0.432 | -6.807±0.678 | 2.73E-05 |
| cg10379112 | 16 | 21169738 | TSS200                    | TMEM159  | -4.511±0.33  | -4.751±0.468 | 2.52E-03 |
| cg09935540 | 16 | 21170428 | GeneBody/1st intron       | DNAH3    | -4.285±0.588 | -4.636±0.677 | 7.75E-03 |
| cg11869721 | 16 | 21611122 | GeneBody/1st exon         | METTL9   | -5.369±0.628 | -5.791±0.681 | 2.59E-03 |
| cg02497428 | 16 | 21665138 | TSS1500                   | IGSF6    | 2.128±0.305  | 2.306±0.343  | 8.50E-03 |
| cg27015931 | 16 | 22012404 | GeneBody/1st exon         | PDZD9    | -2.982±0.177 | -3.17±0.322  | 1.03E-04 |
| cg15703512 | 16 | 22012565 | TSS200                    | PDZD9    | -4.133±0.227 | -4.305±0.243 | 7.72E-04 |
| cg14028823 | 16 | 22218533 | GeneBody/5'UTR/1st intron | EEF2K    | -4.595±0.576 | -5.143±0.585 | 4.03E-05 |
| cg00069261 | 16 | 22386531 | TSS1500                   | CDR2     | -4.174±0.407 | -4.405±0.37  | 7.78E-03 |
| cg20023231 | 16 | 22825282 | TSS1500                   | HS3ST2   | -3.61±0.384  | -3.854±0.468 | 5.42E-03 |
| cg21510697 | 16 | 23161157 | TSS1500                   | USP31    | -4.66±0.364  | -4.954±0.445 | 5.43E-04 |
| cg26809911 | 16 | 23464207 | GeneBody/1st exon         | COG7     | -4.545±0.339 | -5.026±0.448 | 1.25E-07 |
| cg27196102 | 16 | 23464713 | TSS1500                   | COG7     | -4.585±0.755 | -5.13±0.689  | 9.54E-04 |
| cg09060849 | 16 | 23521224 | GeneBody/1st intron       | GGA2     | -3.802±0.406 | -4.06±0.553  | 7.24E-03 |
| cg02741249 | 16 | 23521983 | TSS200                    | GGA2     | -4.215±0.383 | -4.571±0.453 | 8.25E-05 |
| cg17354052 | 16 | 23568699 | TSS200                    | EAR52    | -5.354±0.541 | -5.672±0.498 | 6.08E-03 |
| cg04454391 | 16 | 23607818 | TSS200                    | NDUFAB1  | -5.55±0.654  | -6.213±0.609 | 1.30E-05 |
| cg15042806 | 16 | 23652268 | GeneBody/1st intron       | PALB2    | -4.906±0.462 | -5.17±0.396  | 6.93E-03 |
| cg02735133 | 16 | 23652915 | GeneBody/1st intron       | DCTN5    | -6.005±0.548 | -6.354±0.565 | 3.82E-03 |
| cg06240124 | 16 | 23690079 | TSS200                    | PLK1     | -4.684±0.36  | -4.931±0.312 | 1.42E-03 |
| cg16050957 | 16 | 24550743 | TSS200                    | RBBP6    | -5.82±0.653  | -6.222±0.6   | 4.21E-03 |
| cg27501380 | 16 | 24551577 | GeneBody/5'UTR/1st exon   | RBBP6    | -5.307±0.383 | -5.626±0.496 | 4.61E-04 |
| cg05689121 | 16 | 24740934 | TSS200                    | TNRC6A   | -4.126±0.283 | -4.407±0.452 | 1.15E-04 |
| cg24705286 | 16 | 27215306 | GeneBody/5'UTR/1st exon   | KDM8     | -5.498±0.736 | -6.041±0.647 | 7.07E-04 |
| cg05729093 | 16 | 27324953 | TSS1500                   | IL4R     | -3.13±0.329  | -2.891±0.594 | 6.23E-03 |
| cg03980304 | 16 | 27325000 | TSS1500                   | IL4R     | -4.725±0.459 | -5±0.515     | 7.15E-03 |
| cg09725013 | 16 | 27561559 | GeneBody/1st intron       | KIAA0556 | -5.432±0.335 | -5.862±0.411 | 6.37E-07 |
| cg26062370 | 16 | 27899486 | TSS200                    | GSGL     | -3.839±0.284 | -4.087±0.484 | 8.02E-04 |
| cg22659426 | 16 | 28503060 | GeneBody/1st exon         | CLN3     | -5.339±0.51  | -5.719±0.387 | 5.09E-04 |
| cg06530118 | 16 | 28503379 | GeneBody/5'UTR/1st exon   | CLN3     | -4.517±0.269 | -4.879±0.393 | 6.15E-07 |
| cg14791831 | 16 | 28565295 | GeneBody/5'UTR/1st exon   | CCDC101  | -5.186±0.456 | -5.61±0.702  | 2.41E-04 |
| cg15812873 | 16 | 28635015 | TSS200                    | SULT1A1  | -3.951±0.471 | -4.408±0.599 | 5.99E-05 |
| cg15774133 | 16 | 28722592 | TSS200                    | EIF3C    | -2.445±0.303 | -2.81±0.482  | 6.32E-06 |
| cg01997480 | 16 | 28722859 | GeneBody/5'UTR/1st intron | EIF3CL   | -5.214±0.418 | -5.468±0.496 | 7.44E-03 |
| cg22973038 | 16 | 28857255 | GeneBody                  | TUFM     | -4.289±0.35  | -4.516±0.496 | 6.54E-03 |
| cg11094938 | 16 | 28888844 | TSS1500                   | ATP2A1   | 1.597±0.167  | 1.718±0.232  | 2.53E-03 |
| cg14102807 | 16 | 28943677 | GeneBody                  | CD19     | 1.228±0.156  | 1.369±0.254  | 4.22E-04 |
| cg23517548 | 16 | 28962521 | GeneBody/1st exon         | NFATC2IP | -4.868±0.472 | -5.246±0.53  | 4.69E-04 |
| cg19889584 | 16 | 29625696 | TSS1500                   | SLC7A5P1 | 1.994±0.214  | 2.166±0.257  | 5.53E-04 |
| cg04078251 | 16 | 29802448 | GeneBody/5'UTR/1st exon   | KIF22    | -4.154±0.271 | -4.435±0.438 | 7.26E-05 |

|             |    |          |                           |               |              |              |          |
|-------------|----|----------|---------------------------|---------------|--------------|--------------|----------|
| cg27254601  | 16 | 29817104 | TSS1500                   | MAZ           | -5.613±0.63  | -6.023±0.541 | 2.32E-03 |
| cg23099347  | 16 | 29827497 | TSS200                    | PAGR1         | -5.204±0.403 | -5.68±0.494  | 2.52E-06 |
| cg10985987  | 16 | 29874508 | GeneBody/5'UTR/1st exon   | CDIPT         | -5.039±0.528 | -5.416±0.535 | 1.26E-03 |
| cg24235633  | 16 | 29875177 | GeneBody/1st exon         | CDIPT-AS1     | 2.375±0.31   | 2.56±0.4     | 9.89E-03 |
| cg02556718  | 16 | 29910594 | TSS200                    | SEZ6L2        | -4.302±0.629 | -4.935±0.611 | 1.59E-05 |
| cg14989191  | 16 | 29912071 | TSS200                    | ASPHD1        | -3.471±0.456 | -3.761±0.472 | 3.82E-03 |
| cg01110846  | 16 | 29937190 | GeneBody/1st exon         | KCTD13        | -4.843±0.498 | -5.158±0.617 | 5.87E-03 |
| cg08256260  | 16 | 29937746 | TSS1500                   | KCTD13        | -5.482±0.532 | -5.855±0.531 | 1.48E-03 |
| cg10705951  | 16 | 29985294 | GeneBody/5'UTR/1st exon   | TAOK2         | -5.451±0.652 | -5.95±0.525  | 4.23E-04 |
| cg03920233  | 16 | 30022699 | TSS1500                   | DOC2A         | -5.622±0.64  | -5.979±0.564 | 8.66E-03 |
| cg21742836  | 16 | 30086175 | TSS1500                   | PPP4C         | 0.237±0.183  | 0.36±0.253   | 4.99E-03 |
| cg11970301  | 16 | 30087888 | GeneBody                  | PPP4C         | -4.004±0.331 | -4.454±0.524 | 7.53E-07 |
| cg23353982  | 16 | 30103089 | GeneBody/5'UTR/1st intron | TBX6          | -5.28±0.358  | -5.552±0.362 | 6.62E-04 |
| cg03691812  | 16 | 30194416 | TSS1500                   | CORO1A        | -5.168±0.597 | -5.716±0.567 | 5.76E-05 |
| cg06030619  | 16 | 30194484 | TSS1500                   | CORO1A        | -4.842±0.523 | -5.172±0.483 | 3.39E-03 |
| cg15415545  | 16 | 30206046 | GeneBody/1st exon         | SLX1A-SULT1A3 | -4.764±0.369 | -5.001±0.564 | 8.93E-03 |
| cg19450025  | 16 | 30206073 | GeneBody/1st exon         | SLX1B-SULT1A4 | -2.857±0.399 | -3.18±0.561  | 8.37E-04 |
| cg05116896  | 16 | 30366237 | GeneBody/5'UTR/1st exon   | CD2BP2        | -4.81±0.464  | -5.161±0.492 | 7.75E-04 |
| cg11919694  | 16 | 30380600 | GeneBody/1st exon         | TBC1D10B      | -3.51±0.259  | -3.682±0.333 | 4.25E-03 |
| cg17640201  | 16 | 30407289 | GeneBody/1st intron       | ZNF48         | -4.647±0.563 | -5.14±0.633  | 1.59E-04 |
| cg07842593  | 16 | 30457166 | GeneBody/5'UTR/1st exon   | SEPHS2        | -4.323±0.368 | -4.621±0.513 | 8.26E-04 |
| cg14821083  | 16 | 30457280 | TSS200                    | SEPHS2        | -4.112±0.47  | -4.474±0.515 | 6.79E-04 |
| cg26295990  | 16 | 30538342 | TSS1500                   | ZNF768        | -4.352±0.266 | -4.547±0.449 | 4.39E-03 |
| cg13951948  | 16 | 30546188 | GeneBody/5'UTR/1st exon   | ZNF747        | -5.663±0.548 | -6.102±0.516 | 3.21E-04 |
| cg13669583  | 16 | 30546630 | TSS1500                   | ZNF747        | -0.515±0.146 | -0.361±0.178 | 1.55E-05 |
| cg09438266  | 16 | 30569751 | TSS200                    | ZNF764        | -5.43±0.447  | -6.088±0.731 | 1.89E-07 |
| cg09938681  | 16 | 30582921 | GeneBody/1st intron       | ZNF688        | -4.893±0.448 | -5.153±0.509 | 9.48E-03 |
| cg03309050  | 16 | 30583736 | TSS200                    | ZNF688        | -4.782±0.417 | -5.093±0.359 | 5.96E-04 |
| cg07125009  | 16 | 30621667 | GeneBody/5'UTR/1st exon   | ZNF689        | -5.247±0.521 | -5.783±0.561 | 1.43E-05 |
| cg15928446  | 16 | 30661850 | TSS1500                   | PRR14         | -4.7±0.339   | -5.025±0.388 | 5.06E-05 |
| cg147110524 | 16 | 30662724 | GeneBody/5'UTR/1st intron | PRR14         | -5.509±0.419 | -5.776±0.444 | 4.03E-03 |
| cg23894003  | 16 | 30676444 | GeneBody                  | FBR3          | 1.991±0.137  | 2.124±0.165  | 4.66E-05 |
| cg15970621  | 16 | 30760244 | GeneBody                  | PHKG2         | -5.572±0.425 | -5.908±0.48  | 5.55E-04 |
| cg14828965  | 16 | 30773423 | GeneBody/5'UTR/1st exon   | C16orf93      | -4.209±0.208 | -4.365±0.228 | 9.31E-04 |
| cg13150441  | 16 | 30774108 | TSS1500                   | C16orf93      | -3.731±0.322 | -3.39±0.382  | 1.28E-05 |
| cg07896225  | 16 | 30905137 | TSS200                    | MIR762        | -5.96±0.521  | -6.264±0.466 | 6.08E-03 |
| cg08535091  | 16 | 30934696 | TSS200                    | FBXL19-AS1    | -6.199±0.571 | -6.791±0.526 | 9.56E-06 |
| cg22305782  | 16 | 30937214 | GeneBody                  | FBXL19        | 3.83±0.241   | 4.032±0.299  | 3.78E-04 |
| cg14671453  | 16 | 31044716 | TSS200                    | STX4          | -4.898±0.479 | -5.219±0.577 | 3.32E-03 |
| cg26350691  | 16 | 31084486 | GeneBody/5'UTR/1st exon   | ZNF668        | -3.337±0.383 | -3.66±0.621  | 9.66E-04 |
| cg08395706  | 16 | 31084501 | GeneBody/5'UTR/1st exon   | ZNF668        | -4.704±0.437 | -5.072±0.628 | 5.83E-04 |
| cg18160978  | 16 | 31085251 | GeneBody/5'UTR/1st exon   | ZNF668        | -4.001±0.339 | -4.291±0.624 | 1.48E-03 |
| cg09765256  | 16 | 31085507 | GeneBody/5'UTR/1st exon   | ZNF668        | -4.913±0.546 | -5.334±0.401 | 3.45E-04 |
| cg22062239  | 16 | 31106011 | GeneBody/1st exon         | VKORC1        | -5.461±0.466 | -5.852±0.408 | 1.56E-04 |
| cg15785580  | 16 | 31119650 | GeneBody/5'UTR/1st exon   | BCKDK         | -5.278±0.404 | -5.672±0.485 | 4.57E-05 |
| cg13828871  | 16 | 31128860 | TSS200                    | KAT8          | -4.257±0.473 | -4.525±0.4   | 7.22E-03 |
| cg19819891  | 16 | 31129424 | GeneBody/1st intron       | KAT8          | -5.504±0.513 | -5.908±0.585 | 5.90E-04 |
| cg17022635  | 16 | 31190875 | TSS1500                   | FUS           | -5.111±0.329 | -5.364±0.479 | 1.56E-03 |
| cg18278261  | 16 | 31191521 | GeneBody/5'UTR/1st exon   | FUS           | -5.886±0.629 | -6.39±0.662  | 3.97E-04 |
| cg15247144  | 16 | 31213730 | GeneBody/1st intron       | PYCARD        | -5.231±0.507 | -5.618±0.437 | 4.75E-04 |
| cg15468095  | 16 | 31214401 | TSS1500                   | PYCARD        | -2.261±0.244 | -2.428±0.309 | 3.24E-03 |
| cg13974531  | 16 | 31228444 | TSS200                    | PYDC1         | -1.617±0.181 | -1.752±0.246 | 1.66E-03 |
| cg11884546  | 16 | 31366377 | TSS200                    | ITGAX         | -2.897±0.32  | -3.196±0.343 | 5.92E-05 |
| cg14131445  | 16 | 31519964 | TSS1500                   | C16orf58      | -3.758±0.216 | -4.017±0.336 | 5.99E-06 |
| cg22609068  | 16 | 31711784 | TSS200                    | CLUH3         | -4.793±0.295 | -5.087±0.354 | 3.39E-05 |
| cg15119375  | 16 | 31712039 | GeneBody/1st exon         | CLUH3         | -5.323±0.488 | -5.634±0.493 | 3.64E-03 |
| cg02008169  | 16 | 31885058 | TSS200                    | ZNF267        | -3.336±0.314 | -3.561±0.52  | 4.97E-03 |
| cg19229809  | 16 | 31885194 | GeneBody/1st exon         | ZNF267        | -4.823±0.316 | -5.077±0.334 | 3.89E-04 |
| cg20772904  | 16 | 46654722 | GeneBody/1st intron       | SHCBP1        | -3.858±0.395 | -4.156±0.537 | 1.52E-03 |
| cg03693601  | 16 | 46655349 | TSS200                    | SHCBP1        | -5.369±0.396 | -5.666±0.547 | 1.74E-03 |
| cg13448401  | 16 | 46723048 | GeneBody/5'UTR/1st exon   | VPS35         | -6.122±0.778 | -6.709±0.641 | 5.03E-04 |
| cg25325612  | 16 | 46723166 | TSS200                    | VPS35         | -5.465±0.4   | -5.793±0.366 | 2.21E-04 |
| cg26680127  | 16 | 46783018 | TSS1500                   | MYLK3         | -3.319±0.258 | -3.548±0.332 | 2.11E-04 |
| cg24306924  | 16 | 46918433 | GeneBody/5'UTR/1st intron | GPT2          | -4.978±0.332 | -5.408±0.539 | 2.03E-06 |
| cg18206040  | 16 | 47006731 | GeneBody/1st intron       | DNAJA2        | -4.939±0.485 | -5.256±0.494 | 2.96E-03 |
| cg21369679  | 16 | 47007757 | TSS200                    | DNAJA2        | -4.711±0.362 | -5.117±0.455 | 6.38E-06 |
| cg24728447  | 16 | 47495541 | GeneBody/5'UTR/1st intron | PHKB          | -5.119±0.46  | -5.412±0.342 | 2.38E-03 |
| cg14074641  | 16 | 48181753 | TSS1500                   | ABCC12        | 0.25±0.468   | -0.455±0.66  | 4.62E-08 |
| cg20295000  | 16 | 48278285 | GeneBody/5'UTR/1st exon   | LONP2         | -4.893±0.238 | -5.074±0.295 | 1.08E-03 |
| cg10784785  | 16 | 48419812 | TSS1500                   | SLAH1         | -3.223±0.315 | -3.492±0.547 | 1.13E-03 |
| cg21644628  | 16 | 50099438 | TSS1500                   | HEATR3        | 1.694±0.393  | 1.204±0.554  | 1.83E-06 |
| cg13851211  | 16 | 50321678 | TSS200                    | ADCY7         | 3.593±0.214  | 3.897±0.337  | 3.11E-07 |
| cg25307081  | 16 | 50402689 | GeneBody/5'UTR/1st exon   | BRD7          | -0.893±0.176 | -1.163±0.234 | 2.32E-08 |
| cg06812033  | 16 | 50582453 | GeneBody/5'UTR/1st exon   | NKD1          | -3.809±0.228 | -4.007±0.36  | 5.97E-04 |
| cg02021817  | 16 | 53468150 | TSS200                    | RBL2          | -3.135±0.459 | -3.509±0.532 | 4.18E-04 |
| cg13426503  | 16 | 53468712 | GeneBody/1st intron       | RBL2          | -5.104±0.472 | -5.449±0.482 | 9.97E-04 |
| cg10965432  | 16 | 53537025 | GeneBody/5'UTR/1st intron | AKTIP         | -5.513±0.552 | -6.101±0.619 | 9.59E-06 |
| cg01998785  | 16 | 55542709 | TSS1500                   | LPCAT2        | 2.53±0.198   | 2.395±0.306  | 5.68E-03 |
| cg21530453  | 16 | 56226346 | GeneBody/1st intron       | GNAO1         | -4.291±0.39  | -4.544±0.411 | 3.25E-03 |
| cg22655224  | 16 | 56623448 | GeneBody/5'UTR/1st exon   | MT3           | -4.986±0.478 | -5.33±0.479  | 1.16E-03 |
| cg011190915 | 16 | 56642761 | GeneBody/1st intron       | MT2A          | -4.236±0.475 | -4.551±0.504 | 2.74E-03 |
| cg10014293  | 16 | 56703833 | GeneBody/1st intron       | MT1H          | -3.063±0.33  | -3.278±0.394 | 4.21E-03 |
| cg15473868  | 16 | 56716621 | GeneBody/1st intron       | MT1X          | -4.358±0.362 | -4.614±0.453 | 2.20E-03 |
| cg17759354  | 16 | 56898786 | TSS1500                   | SLC12A3       | 2.94±0.212   | 3.213±0.354  | 2.69E-06 |
| cg17808849  | 16 | 56965376 | TSS1500                   | HERPUD1       | -4.354±0.343 | -4.715±0.475 | 2.58E-05 |
| cg08696890  | 16 | 57126212 | TSS1500                   | CPNE2         | -5.245±0.423 | -5.621±0.394 | 8.62E-05 |
| cg03713346  | 16 | 57126807 | GeneBody/5'UTR/1st intron | CPNE2         | -5.385±0.467 | -5.745±0.502 | 6.51E-04 |
| cg06688848  | 16 | 57220097 | TSS200                    | FAM192A       | -4.895±0.411 | -5.148±0.447 | 5.49E-03 |
| cg22136326  | 16 | 57278759 | TSS1500                   | ARL2BP        | -5.452±0.645 | -5.928±0.617 | 8.26E-04 |
| cg19546781  | 16 | 57438715 | GeneBody/5'UTR/1st exon   | CCL17         | 2.803±0.2    | 3.041±0.339  | 1.14E-05 |
| cg20142224  | 16 | 57520176 | GeneBody/5'UTR/1st intron | DOK4          | -4.667±0.355 | -5.161±0.495 | 2.14E-07 |
| cg26352374  | 16 | 57570280 | GeneBody/5'UTR/1st intron | CCDC102A      | -5.879±0.628 | -6.489±0.661 | 3.33E-05 |
| cg20687462  | 16 | 57570777 | TSS1500                   | CCDC102A      | -5.148±0.326 | -5.338±0.328 | 7.41E-03 |
| cg15153383  | 16 | 57770620 | GeneBody/5'UTR/1st intron | KATNB1        | -4.005±0.363 | -4.218±0.356 | 6.92E-03 |
| cg27519236  | 16 | 57836397 | GeneBody/5'UTR/1st exon   | KIFC3         | -5.669±0.605 | -6.035±0.612 | 5.59E-03 |

|            |    |          |                           |              |              |              |          |
|------------|----|----------|---------------------------|--------------|--------------|--------------|----------|
| cg13156121 | 16 | 58010114 | TSS1500                   | TEPP         | 2.621±0.212  | 2.753±0.256  | 6.01E-03 |
| cg03278960 | 16 | 58035186 | TSS200                    | USB1         | -5.316±0.465 | -5.706±0.509 | 2.59E-04 |
| cg07398350 | 16 | 58035398 | GeneBody/1st exon         | USB1         | -4.251±0.47  | -4.566±0.45  | 2.03E-03 |
| cg16652241 | 16 | 58059321 | GeneBody/5'UTR/1st exon   | MMP15        | -3.743±0.264 | -3.937±0.384 | 2.56E-03 |
| cg05732130 | 16 | 58426207 | TSS200                    | GIN3         | -4.682±0.419 | -4.993±0.575 | 1.83E-03 |
| cg13031432 | 16 | 58497767 | GeneBody/5'UTR/1st intron | NDRG4        | -5.164±0.541 | -5.583±0.577 | 6.00E-04 |
| cg21335942 | 16 | 58549945 | GeneBody                  | SETD6        | -5.405±0.834 | -6.183±0.824 | 5.00E-05 |
| cg23761196 | 16 | 58664510 | TSS1500                   | CNOT1        | -3.038±0.363 | -2.681±0.39  | 3.02E-05 |
| cg14863484 | 16 | 58768010 | GeneBody/1st intron       | GOT2         | -4.702±0.529 | -5.003±0.548 | 9.07E-03 |
| cg08872742 | 16 | 66400320 | TSS1500                   | CDH5         | -0.689±0.148 | -0.836±0.194 | 4.62E-05 |
| cg19510999 | 16 | 66586309 | TSS200                    | CKLF         | -5.264±0.418 | -5.576±0.418 | 7.75E-04 |
| cg10221501 | 16 | 66600394 | GeneBody/5'UTR/1st exon   | CMTM1        | 3.124±0.254  | 3.281±0.324  | 7.10E-03 |
| cg11140307 | 16 | 66730384 | GeneBody/1st exon         | CMTM4        | -4.994±0.379 | -5.343±0.487 | 1.23E-04 |
| cg09222791 | 16 | 66835320 | GeneBody/5'UTR/1st intron | CCDC79       | 5.131±0.364  | 5.41±0.334   | 4.98E-04 |
| cg02801598 | 16 | 66914223 | TSS200                    | PDP2         | -4.239±0.414 | -4.672±0.649 | 5.37E-05 |
| cg21112925 | 16 | 66968030 | GeneBody/1st intron       | FAM96B       | -4.432±0.311 | -4.706±0.521 | 6.98E-04 |
| cg03570976 | 16 | 66968476 | GeneBody/1st exon         | CES2         | -5.415±0.572 | -5.825±0.608 | 1.33E-03 |
| cg06621126 | 16 | 67198243 | GeneBody/5'UTR            | HSF4         | -4.349±0.328 | -4.61±0.473  | 1.10E-03 |
| cg17896249 | 16 | 67225987 | TSS200                    | E2F4         | -5.031±0.444 | -5.351±0.453 | 1.15E-03 |
| cg05501658 | 16 | 67226184 | GeneBody/1st exon         | E2F4         | -4.693±0.41  | -5.028±0.504 | 4.77E-04 |
| cg25341653 | 16 | 67233277 | GeneBody/1st exon         | ELMO3        | 1.428±0.218  | 1.662±0.302  | 1.90E-05 |
| cg14440934 | 16 | 67450691 | TSS1500                   | ZDHHC1       | -2.559±0.582 | -2.921±0.519 | 3.64E-03 |
| cg08789908 | 16 | 67464707 | TSS1500                   | HSD11B2      | -3.572±0.214 | -3.778±0.31  | 1.13E-04 |
| cg15301525 | 16 | 67515344 | TSS1500                   | ATP6V0D1     | -5.72±0.402  | -5.968±0.36  | 3.95E-03 |
| cg01866162 | 16 | 67596514 | GeneBody/5'UTR/1st exon   | CTCF         | -5.592±0.519 | -6.144±0.719 | 2.22E-05 |
| cg04155026 | 16 | 67841269 | GeneBody/5'UTR/1st exon   | TSNAXIP1     | -3.857±0.377 | -4.087±0.511 | 9.58E-03 |
| cg12845249 | 16 | 67876451 | GeneBody/5'UTR/1st exon   | THAP11       | -4.949±0.301 | -5.139±0.331 | 4.61E-03 |
| cg17582250 | 16 | 67906816 | TSS200                    | EDC4         | -4.569±0.574 | -5.112±0.665 | 6.30E-05 |
| cg21196187 | 16 | 67926862 | TSS1500                   | PSKH1        | -4.77±0.479  | -5.141±0.441 | 4.54E-04 |
| cg10458876 | 16 | 67927632 | GeneBody/5'UTR/1st intron | PSKH1        | -3.252±0.168 | -3.355±0.174 | 5.45E-03 |
| cg13846555 | 16 | 67970749 | GeneBody/5'UTR/1st exon   | PSMB10       | -4.531±0.257 | -4.815±0.431 | 3.40E-05 |
| cg11451801 | 16 | 67970768 | GeneBody/5'UTR/1st exon   | PSMB10       | -5.379±0.613 | -5.848±0.481 | 4.10E-04 |
| cg06071083 | 16 | 68002365 | GeneBody/1st exon         | SLC12A4      | -5.773±0.533 | -6.142±0.596 | 2.08E-03 |
| cg23401756 | 16 | 68013981 | GeneBody/1st intron       | DPEP3        | 5.052±0.293  | 5.277±0.57   | 5.39E-03 |
| cg04774694 | 16 | 68033270 | GeneBody/5'UTR/1st intron | DPEP2        | 1.385±0.145  | 1.492±0.232  | 3.64E-03 |
| cg11289251 | 16 | 68056774 | TSS200                    | DUS2L        | -6.018±0.503 | -6.372±0.559 | 1.79E-03 |
| cg21348691 | 16 | 68057212 | GeneBody/5'UTR/1st exon   | DUS2L        | -4.645±0.405 | -5.12±0.603  | 6.60E-06 |
| cg18711066 | 16 | 68118822 | TSS1500                   | NFATC3       | -3.8±0.406   | -4.236±0.471 | 9.81E-06 |
| cg17125623 | 16 | 68119985 | GeneBody/1st intron       | NFATC3       | -2.792±0.507 | -3.131±0.71  | 5.19E-03 |
| cg19105690 | 16 | 68278969 | TSS1500                   | PLA2G15      | -5.216±0.524 | -5.557±0.415 | 2.09E-03 |
| cg22328890 | 16 | 68298258 | TSS200                    | SLC7A6       | -4.984±0.393 | -5.287±0.569 | 1.52E-03 |
| cg21918026 | 16 | 68344902 | GeneBody/5'UTR/1st exon   | PRMT7        | -3.303±0.247 | -3.471±0.227 | 1.72E-03 |
| cg11893236 | 16 | 68345102 | GeneBody/5'UTR/1st intron | PRMT7        | -4.553±0.328 | -4.772±0.46  | 5.08E-03 |
| cg22116290 | 16 | 68481968 | GeneBody/5'UTR/1st intron | SMPD3        | -2.993±0.226 | -3.172±0.365 | 1.75E-03 |
| cg19034028 | 16 | 68677364 | TSS1500                   | CDH3         | 1.473±0.262  | 1.673±0.31   | 9.26E-04 |
| cg03169715 | 16 | 69140794 | TSS1500                   | HAS3         | -5.168±0.45  | -5.425±0.37  | 6.53E-03 |
| cg04779191 | 16 | 69166964 | GeneBody/5'UTR/1st intron | CIRH1A       | -4.398±0.44  | -4.814±0.526 | 6.84E-05 |
| cg08461397 | 16 | 69220726 | TSS1500                   | SNTB2        | -3.777±0.413 | -4.103±0.597 | 1.18E-03 |
| cg25300941 | 16 | 69344885 | TSS1500                   | VPS4A        | -4.473±0.476 | -4.835±0.551 | 8.90E-04 |
| cg18347238 | 16 | 69345951 | GeneBody/1st intron       | VPS4A        | -4.575±0.23  | -4.772±0.28  | 2.77E-04 |
| cg21658946 | 16 | 69364455 | GeneBody/1st exon         | PDF          | -5.394±0.559 | -5.746±0.578 | 4.07E-03 |
| cg23445511 | 16 | 69373498 | GeneBody/5'UTR/1st exon   | COG8         | -4.391±0.325 | -4.205±0.289 | 7.08E-03 |
| cg04391736 | 16 | 69373674 | TSS200                    | COG8         | -5.376±0.35  | -5.834±0.625 | 3.34E-06 |
| cg09669099 | 16 | 69419557 | GeneBody/1st exon         | TERF2        | -3.114±0.345 | -2.703±0.509 | 4.98E-06 |
| cg03970351 | 16 | 69420083 | TSS200                    | TERF2        | -5.716±0.556 | -6.257±0.54  | 2.78E-05 |
| cg05439318 | 16 | 69458329 | TSS200                    | CYB5B        | -4.859±0.399 | -5.369±0.53  | 8.78E-07 |
| cg26183662 | 16 | 69599438 | TSS1500                   | NFAT5        | -3.507±0.278 | -3.697±0.461 | 7.34E-03 |
| cg10708675 | 16 | 69760758 | TSS1500                   | NQO1         | -3.654±0.379 | -3.869±0.332 | 7.52E-03 |
| cg09617747 | 16 | 69788565 | GeneBody                  | NOB1         | -4.54±0.398  | -4.775±0.353 | 5.52E-03 |
| cg11564268 | 16 | 69789107 | TSS1500                   | NOB1         | -5.112±0.449 | -5.412±0.579 | 3.98E-03 |
| cg09594067 | 16 | 70285806 | GeneBody/5'UTR/1st exon   | EXOSC6       | -5.026±0.542 | -5.348±0.592 | 7.28E-03 |
| cg10468369 | 16 | 70333434 | GeneBody/1st intron       | DDX19B       | -5.19±0.443  | -5.519±0.424 | 7.53E-04 |
| cg11093356 | 16 | 70380593 | GeneBody/1st exon         | LOC100506083 | -4.743±0.32  | -5.11±0.505  | 1.30E-05 |
| cg00958517 | 16 | 70473316 | TSS1500                   | ST3GAL2      | -4.074±0.263 | -4.314±0.598 | 2.42E-03 |
| cg09881917 | 16 | 70487956 | TSS1500                   | FUK          | -3.969±0.654 | -4.384±0.61  | 3.25E-03 |
| cg16806347 | 16 | 70488291 | TSS1500                   | FUK          | -4.796±0.411 | -5.269±0.582 | 7.14E-06 |
| cg12347740 | 16 | 70680380 | GeneBody/5'UTR/1st intron | IL34         | 1.55±0.181   | 1.665±0.201  | 4.41E-03 |
| cg05547993 | 16 | 70835035 | GeneBody/5'UTR/1st exon   | VAC14        | -4.985±0.481 | -5.31±0.562  | 2.86E-03 |
| cg27626318 | 16 | 70835285 | TSS1500                   | VAC14        | -4.476±0.489 | -4.847±0.574 | 9.66E-04 |
| cg10475433 | 16 | 71323603 | TSS200                    | FTSJD1       | -4.027±0.28  | -4.224±0.392 | 3.31E-03 |
| cg07114894 | 16 | 71495698 | GeneBody/5'UTR/1st exon   | ZNF23        | -4.013±0.409 | -4.309±0.465 | 1.42E-03 |
| cg15824968 | 16 | 71842778 | GeneBody/5'UTR/1st exon   | AP1G1        | -4.586±0.333 | -4.906±0.394 | 5.35E-05 |
| cg03047098 | 16 | 71843015 | TSS200                    | AP1G1        | -4.72±0.548  | -5.193±0.561 | 1.49E-04 |
| cg07817698 | 16 | 72042925 | GeneBody/1st intron       | DHODH        | -3.617±0.546 | -3.935±0.533 | 7.14E-03 |
| cg21228284 | 16 | 72127518 | GeneBody/5'UTR/1st exon   | TXNL4B       | -4.468±0.429 | -4.88±0.502  | 5.25E-05 |
| cg01994779 | 16 | 75033384 | GeneBody/5'UTR/1st exon   | ZNRF1        | -4.439±0.592 | -5.087±0.641 | 5.88E-06 |
| cg24429836 | 16 | 75150744 | TSS200                    | LDHD         | -0.985±0.197 | -0.857±0.285 | 6.95E-03 |
| cg03217964 | 16 | 75182191 | TSS1500                   | ZFP1         | -4.536±0.288 | -4.864±0.49  | 2.41E-05 |
| cg27005053 | 16 | 75467374 | GeneBody/5'UTR/1st exon   | CFDP1        | -5.509±0.48  | -5.909±0.582 | 3.62E-04 |
| cg13906548 | 16 | 75600564 | GeneBody/1st intron       | GABARAPL2    | -5.046±0.533 | -5.442±0.454 | 6.37E-04 |
| cg08585897 | 16 | 75680535 | GeneBody/1st intron       | KARS         | -0.362±0.531 | -0.964±0.597 | 3.77E-06 |
| cg06793062 | 16 | 76343868 | GeneBody/1st intron       | CNTNAP4      | 1.678±0.22   | 1.83±0.314   | 4.16E-03 |
| cg18383391 | 16 | 77224198 | TSS1500                   | MON1B        | -5.053±0.398 | -5.357±0.477 | 9.44E-04 |
| cg16508857 | 16 | 78133117 | TSS1500                   | WVOX         | -4.03±0.279  | -4.211±0.397 | 6.90E-03 |
| cg06532176 | 16 | 78133804 | GeneBody/1st intron       | WVOX         | -5.339±0.497 | -5.638±0.384 | 4.04E-03 |
| cg14055374 | 16 | 79634410 | GeneBody/5'UTR/1st exon   | MAF          | -5.361±0.504 | -5.701±0.423 | 1.59E-03 |
| cg10689889 | 16 | 79634732 | TSS200                    | MAF          | -5.915±0.49  | -6.505±0.577 | 1.58E-06 |
| cg27555479 | 16 | 80574649 | TSS1500                   | DYNLRB2      | -2.72±0.173  | -2.917±0.297 | 2.50E-05 |
| cg00720137 | 16 | 80575018 | GeneBody/1st intron       | DYNLRB2      | -5.133±0.403 | -5.533±0.624 | 1.06E-04 |
| cg20567721 | 16 | 81040639 | TSS200                    | CMC2         | -3.007±0.155 | -3.222±0.283 | 1.44E-06 |
| cg15264808 | 16 | 81041398 | TSS1500                   | CMC2         | -4.466±0.725 | -5.022±0.738 | 5.97E-04 |
| cg12879297 | 16 | 81111074 | GeneBody/5'UTR/1st exon   | C16orf46     | -5.01±0.316  | -5.222±0.322 | 2.26E-03 |
| cg24687764 | 16 | 81111074 | TSS1500                   | C16orf46     | -3.721±0.357 | -4.044±0.5   | 2.23E-04 |
| cg17465631 | 16 | 81272500 | GeneBody/5'UTR/1st exon   | BCMO1        | -1.521±0.139 | -1.611±0.225 | 9.62E-03 |
| cg05916783 | 16 | 81348309 | TSS1500                   | GAN          | -4.778±0.35  | -5.037±0.32  | 7.53E-04 |

|            |    |          |                           |                   |              |              |          |
|------------|----|----------|---------------------------|-------------------|--------------|--------------|----------|
| cg08355340 | 16 | 82203585 | GeneBody/1st intron       | <i>MPHOSPH6</i>   | -5.661±0.458 | -5.931±0.39  | 5.37E-03 |
| cg02168291 | 16 | 82671520 | GeneBody/1st intron       | <i>CDH13</i>      | 1.829±0.217  | 2.005±0.33   | 1.09E-03 |
| cg03930357 | 16 | 84150069 | GeneBody/5'UTR/1st intron | <i>MBTPS1</i>     | -4.001±0.282 | -4.264±0.571 | 1.02E-03 |
| cg26359240 | 16 | 84179959 | GeneBody/1st intron       | <i>DNAAF1</i>     | 2.839±0.172  | 2.993±0.259  | 3.31E-04 |
| cg20315643 | 16 | 84220562 | GeneBody/5'UTR/1st exon   | <i>TAF1C</i>      | -3.988±0.271 | -4.263±0.346 | 3.20E-05 |
| cg12533335 | 16 | 84220778 | TSS200                    | <i>TAF1C</i>      | -4.03±0.374  | -4.343±0.36  | 1.98E-04 |
| cg17561452 | 16 | 84224707 | TSS200                    | <i>ADAD2</i>      | 2.458±0.272  | 2.64±0.321   | 3.23E-03 |
| cg22677246 | 16 | 84651094 | GeneBody                  | <i>COTL1</i>      | -5.619±0.567 | -6.173±0.589 | 2.97E-05 |
| cg13623690 | 16 | 84651800 | TSS200                    | <i>COTL1</i>      | -4.402±0.39  | -4.72±0.424  | 3.62E-04 |
| cg07179770 | 16 | 84681994 | TSS200                    | <i>KLHL36</i>     | -4.837±0.632 | -5.515±0.662 | 7.36E-06 |
| cg01211097 | 16 | 84732969 | TSS1500                   | <i>USP10</i>      | -0.721±0.215 | -0.524±0.266 | 1.15E-04 |
| cg01876612 | 16 | 85045424 | TSS1500                   | <i>ZDHHC7</i>     | -4.952±0.563 | -5.395±0.568 | 4.55E-04 |
| cg16034046 | 16 | 85646474 | TSS1500                   | <i>GSE1</i>       | -5.626±0.462 | -6±0.489     | 3.59E-04 |
| cg23530850 | 16 | 85647010 | GeneBody/1st intron       | <i>GSE1</i>       | -4.918±0.538 | -5.287±0.484 | 1.49E-03 |
| cg23871933 | 16 | 85722399 | GeneBody/1st intron       | <i>GIN52</i>      | -4.202±0.238 | -4.352±0.268 | 5.06E-03 |
| cg09831311 | 16 | 85833828 | GeneBody/5'UTR/1st intron | <i>COX4I1</i>     | -4.683±0.34  | -4.924±0.351 | 1.37E-03 |
| cg24826867 | 16 | 85932853 | GeneBody/5'UTR/1st intron | <i>IRF8</i>       | -4.426±0.377 | -4.735±0.484 | 5.37E-04 |
| cg06602857 | 16 | 86542807 | TSS1500                   | <i>FENDRR</i>     | -4.595±0.327 | -4.816±0.349 | 2.28E-03 |
| cg24063470 | 16 | 86600389 | TSS1500                   | <i>FOXC2</i>      | -4.115±0.398 | -4.417±0.456 | 8.83E-04 |
| cg06330621 | 16 | 87525461 | TSS200                    | <i>ZCCHC14</i>    | -0.453±0.303 | -0.147±0.359 | 2.63E-05 |
| cg18676679 | 16 | 87984422 | TSS1500                   | <i>BANP</i>       | -5.515±0.48  | -5.932±0.504 | 1.47E-04 |
| cg03631076 | 16 | 87985047 | GeneBody/5'UTR/1st exon   | <i>BANP</i>       | -4.792±0.421 | -5.11±0.458  | 8.21E-04 |
| cg23830326 | 16 | 88637332 | GeneBody/5'UTR/1st intron | <i>ZC3H18</i>     | -5.027±0.532 | -5.323±0.452 | 8.33E-03 |
| cg06178072 | 16 | 88922252 | GeneBody/1st intron       | <i>GALNS</i>      | 2.806±0.124  | 3.096±0.3    | 2.14E-10 |
| cg08781448 | 16 | 88923231 | GeneBody/1st exon         | <i>GALNS</i>      | -6.023±0.572 | -6.455±0.566 | 6.82E-04 |
| cg00151607 | 16 | 88923507 | GeneBody/5'UTR/1st exon   | <i>TRAPPC2L</i>   | -4.824±0.312 | -5.213±0.538 | 5.87E-06 |
| cg15206445 | 16 | 89573312 | TSS1500                   | <i>SPG7</i>       | 0.563±0.192  | 0.704±0.269  | 2.22E-03 |
| cg04879696 | 16 | 89574810 | GeneBody/5'UTR/1st exon   | <i>SPG7</i>       | -4.617±0.341 | -4.847±0.382 | 2.74E-03 |
| cg23877786 | 16 | 89626662 | TSS1500                   | <i>RPL13</i>      | -3.619±0.245 | -3.878±0.349 | 2.79E-05 |
| cg07690018 | 16 | 89642492 | GeneBody/1st intron       | <i>CPNE7</i>      | -3.87±0.341  | -4.158±0.433 | 3.82E-04 |
| cg15993402 | 16 | 89723979 | TSS200                    | <i>SPATA33</i>    | -5.299±0.468 | -5.651±0.465 | 7.20E-04 |
| cg27462160 | 16 | 89768630 | TSS1500                   | <i>SPATA2L</i>    | -3.352±0.348 | -3.552±0.267 | 5.98E-03 |
| cg02609749 | 16 | 89786786 | TSS1500                   | <i>ZNF276</i>     | -3.104±0.259 | -3.351±0.378 | 1.39E-04 |
| cg21306218 | 16 | 89787478 | TSS200                    | <i>VPS9D1</i>     | -4.565±0.423 | -4.946±0.611 | 2.64E-04 |
| cg19216839 | 16 | 89882934 | GeneBody/1st intron       | <i>FANCA</i>      | -5.298±0.496 | -5.649±0.625 | 2.24E-03 |
| cg01161216 | 16 | 89939448 | TSS1500                   | <i>TCF25</i>      | -4.456±0.285 | -4.623±0.294 | 7.39E-03 |
| cg14696348 | 16 | 89984517 | GeneBody/5'UTR/1st exon   | <i>MC1R</i>       | -4.962±0.507 | -5.251±0.467 | 7.70E-03 |
| cg03634997 | 16 | 90089283 | GeneBody/1st intron       | <i>GAS8</i>       | -4.008±0.311 | -4.228±0.513 | 5.41E-03 |
| cg04326040 | 17 | 617519   | GeneBody/1st intron       | <i>VPS53</i>      | -3.837±0.455 | -4.163±0.575 | 2.06E-03 |
| cg06500079 | 17 | 619033   | TSS1500                   | <i>VPS53</i>      | -2.289±0.384 | -2.607±0.622 | 1.16E-03 |
| cg10318443 | 17 | 685449   | TSS200                    | <i>RNMTL1</i>     | -5.405±0.465 | -5.874±0.462 | 1.65E-05 |
| cg00224234 | 17 | 685693   | TSS200                    | <i>GLOD4</i>      | -6.123±0.426 | -6.444±0.407 | 6.54E-04 |
| cg19816938 | 17 | 1082526  | GeneBody/1st intron       | <i>ABR</i>        | -4.57±0.434  | -4.87±0.594  | 3.61E-03 |
| cg18085206 | 17 | 1359243  | GeneBody/1st exon         | <i>CRK</i>        | -5.934±0.643 | -6.686±0.73  | 2.34E-06 |
| cg06197006 | 17 | 1359813  | TSS1500                   | <i>CRK</i>        | -4.753±0.281 | -5.202±0.512 | 9.23E-08 |
| cg00597076 | 17 | 1395880  | GeneBody/5'UTR/1st exon   | <i>MYO1C</i>      | 0.389±0.166  | 0.51±0.253   | 3.05E-03 |
| cg20612559 | 17 | 1419634  | GeneBody/5'UTR/1st intron | <i>INPP5K</i>     | -5.125±0.472 | -5.668±0.49  | 2.46E-06 |
| cg11023442 | 17 | 1420488  | GeneBody/1st intron       | <i>PITPNA-AS1</i> | -4.896±0.4   | -5.333±0.566 | 1.62E-05 |
| cg11896345 | 17 | 1532217  | TSS200                    | <i>SLC43A2</i>    | -4.921±0.41  | -5.213±0.522 | 2.24E-03 |
| cg19400725 | 17 | 1552970  | GeneBody/1st exon         | <i>RILP</i>       | -4.484±0.248 | -4.646±0.327 | 5.12E-03 |
| cg04317366 | 17 | 1588445  | TSS1500                   | <i>PRPF8</i>      | -3.78±0.371  | -4.072±0.515 | 1.05E-03 |
| cg00422913 | 17 | 1619022  | GeneBody/1st intron       | <i>MIR22HG</i>    | -4.196±0.362 | -4.401±0.331 | 7.92E-03 |
| cg11099291 | 17 | 1620044  | GeneBody/5'UTR/1st intron | <i>WDR81</i>      | -4.434±0.299 | -4.654±0.287 | 8.31E-04 |
| cg17057072 | 17 | 1733021  | GeneBody/5'UTR/1st exon   | <i>SMYD4</i>      | -3.519±0.351 | -3.881±0.378 | 1.45E-05 |
| cg11516377 | 17 | 1933153  | TSS1500                   | <i>DPH1</i>       | -2.809±0.283 | -3.011±0.432 | 3.96E-03 |
| cg25340056 | 17 | 1933471  | GeneBody/1st exon         | <i>DPH1</i>       | -6.062±0.576 | -6.511±0.576 | 4.87E-04 |
| cg23906144 | 17 | 1945509  | GeneBody/1st exon         | <i>OVCA2</i>      | -5.25±0.63   | -5.618±0.607 | 6.83E-03 |
| cg17210604 | 17 | 1958117  | TSS1500                   | <i>HIC1</i>       | -4.537±0.424 | -4.835±0.485 | 1.92E-03 |
| cg01168201 | 17 | 1958412  | GeneBody/5'UTR/1st exon   | <i>HIC1</i>       | -4.984±0.365 | -5.246±0.536 | 3.20E-03 |
| cg21745320 | 17 | 2207495  | GeneBody/5'UTR/1st intron | <i>SRR</i>        | -3.683±0.214 | -3.844±0.25  | 1.04E-03 |
| cg18557086 | 17 | 2304670  | TSS1500                   | <i>MNT</i>        | -3.583±0.413 | -4.059±0.616 | 9.15E-06 |
| cg10911877 | 17 | 2496280  | TSS1500                   | <i>PAFAH1B1</i>   | -4.232±0.38  | -4.567±0.439 | 1.53E-04 |
| cg13719194 | 17 | 2496962  | GeneBody/5'UTR/1st exon   | <i>PAFAH1B1</i>   | -2.925±0.295 | -3.193±0.454 | 3.23E-04 |
| cg26932976 | 17 | 2615186  | TSS1500                   | <i>CLUH</i>       | -5.256±0.375 | -5.53±0.556  | 2.72E-03 |
| cg06882926 | 17 | 3031354  | TSS1500                   | <i>OR1G1</i>      | 0.696±0.334  | 0.884±0.333  | 9.44E-03 |
| cg06862644 | 17 | 3375469  | TSS1500                   | <i>SPATA22</i>    | 2.45±0.184   | 2.575±0.315  | 8.72E-03 |
| cg25371182 | 17 | 3539597  | GeneBody/5'UTR/1st exon   | <i>SHPK</i>       | -3.649±0.3   | -3.891±0.275 | 2.69E-04 |
| cg25026013 | 17 | 3571884  | GeneBody/5'UTR/1st exon   | <i>TAX1BP3</i>    | -5.038±0.57  | -5.514±0.59  | 2.33E-04 |
| cg12004730 | 17 | 3572336  | GeneBody/5'UTR/1st intron | <i>EMC6</i>       | -5.143±0.366 | -5.416±0.379 | 8.50E-04 |
| cg14781919 | 17 | 3627394  | GeneBody/1st exon         | <i>GS2</i>        | -5.81±0.549  | -6.225±0.591 | 8.11E-04 |
| cg01526089 | 17 | 3819390  | GeneBody/1st exon         | <i>P2RX1</i>      | 1.567±0.305  | 1.746±0.305  | 6.87E-03 |
| cg15443822 | 17 | 3867014  | GeneBody/1st intron       | <i>ATP2A3</i>     | -3.861±0.299 | -4.063±0.513 | 8.93E-03 |
| cg01914242 | 17 | 3868068  | TSS1500                   | <i>ATP2A3</i>     | -4.927±0.511 | -5.306±0.46  | 6.78E-04 |
| cg01040062 | 17 | 4046467  | GeneBody/5'UTR/1st exon   | <i>CYB5D2</i>     | -4.36±0.32   | -4.668±0.409 | 6.99E-05 |
| cg12188482 | 17 | 4046863  | TSS200                    | <i>CYB5D2</i>     | -5.491±0.59  | -6.008±0.524 | 9.30E-05 |
| cg05922057 | 17 | 4047571  | GeneBody/5'UTR/1st intron | <i>CYB5D2</i>     | -4.03±0.319  | -4.295±0.393 | 3.99E-04 |
| cg21705120 | 17 | 4270245  | TSS1500                   | <i>UBE2G1</i>     | -3.973±0.427 | -4.246±0.443 | 3.70E-03 |
| cg23916158 | 17 | 4458473  | GeneBody/1st exon         | <i>MYBBP1A</i>    | -4.981±0.518 | -5.403±0.583 | 3.89E-04 |
| cg09872233 | 17 | 4544925  | GeneBody/1st exon         | <i>ALOX15</i>     | -4.238±0.394 | -4.491±0.534 | 6.43E-03 |
| cg03950654 | 17 | 4613328  | TSS1500                   | <i>ARRB2</i>      | -5.379±0.308 | -5.584±0.359 | 3.28E-03 |
| cg19478743 | 17 | 4642647  | GeneBody/1st exon         | <i>CXCL16</i>     | -4.357±0.376 | -4.583±0.407 | 6.61E-03 |
| cg16882703 | 17 | 4699334  | TSS200                    | <i>PSMB6</i>      | -2.017±0.278 | -1.803±0.407 | 1.61E-03 |
| cg21295602 | 17 | 4699635  | GeneBody/1st intron       | <i>PSMB6</i>      | -4.946±0.977 | -5.537±0.97  | 5.45E-03 |
| cg24221059 | 17 | 4699732  | GeneBody/1st intron       | <i>PSMB6</i>      | -4.248±0.472 | -4.603±0.504 | 8.30E-04 |
| cg16685860 | 17 | 4710619  | GeneBody/5'UTR/1st intron | <i>PLD2</i>       | -5.178±0.573 | -5.738±0.754 | 6.06E-05 |
| cg06554928 | 17 | 4852795  | TSS1500                   | <i>PFN1</i>       | -3.92±0.176  | -4.035±0.211 | 4.04E-03 |
| cg17820591 | 17 | 4853706  | TSS1500                   | <i>ENO3</i>       | -4.031±0.291 | -4.337±0.374 | 1.90E-05 |
| cg13818368 | 17 | 4871354  | TSS1500                   | <i>SPAG7</i>      | -4.304±0.316 | -4.497±0.435 | 9.69E-03 |
| cg07811750 | 17 | 4890503  | GeneBody/5'UTR/1st exon   | <i>CAMTA2</i>     | -5.627±0.728 | -6.191±0.669 | 4.39E-04 |
| cg25349574 | 17 | 4891291  | TSS1500                   | <i>CAMTA2</i>     | -4.726±0.536 | -5.206±0.512 | 8.20E-05 |
| cg19425528 | 17 | 4901101  | TSS200                    | <i>KIF1C</i>      | -3.609±0.309 | -3.892±0.606 | 1.06E-03 |
| cg11264817 | 17 | 4901584  | GeneBody/5'UTR/1st intron | <i>KIF1C</i>      | -5.831±0.604 | -6.281±0.616 | 8.31E-04 |
| cg04862249 | 17 | 4982244  | GeneBody/5'UTR/1st intron | <i>ZFP3</i>       | -4.095±0.292 | -4.408±0.446 | 3.13E-05 |
| cg24680602 | 17 | 5026393  | GeneBody/5'UTR/1st exon   | <i>ZNF232</i>     | -3.276±0.384 | -3.545±0.494 | 2.62E-03 |
| cg12763546 | 17 | 5027051  | TSS1500                   | <i>ZNF232</i>     | 0.688±0.187  | 0.869±0.325  | 2.64E-04 |

|            |    |          |                           |                     |              |              |          |
|------------|----|----------|---------------------------|---------------------|--------------|--------------|----------|
| cg17505757 | 17 | 5323140  | TSS200                    | <i>NUP88</i>        | -3.444±0.513 | -3.827±0.473 | 6.67E-04 |
| cg26500816 | 17 | 6339466  | TSS1500                   | <i>AIP1</i>         | -4.482±0.31  | -4.678±0.319 | 3.84E-03 |
| cg22459930 | 17 | 6544061  | TSS200                    | <i>TXNDC17</i>      | -4.402±0.238 | -4.574±0.274 | 1.49E-03 |
| cg26382071 | 17 | 6544903  | TSS1500                   | <i>KIAA0753</i>     | -4.472±0.29  | -4.906±0.471 | 1.28E-07 |
| cg07265622 | 17 | 6554855  | GeneBody/5'UTR/1st exon   | <i>MED31</i>        | -3.492±0.178 | -3.744±0.339 | 1.40E-06 |
| cg27146152 | 17 | 6659364  | GeneBody/1st exon         | <i>XAF1</i>         | -4.339±0.313 | -4.553±0.444 | 1.47E-03 |
| cg13337865 | 17 | 6734991  | GeneBody/5'UTR/1st exon   | <i>TEKT1</i>        | -3.874±0.275 | -4.081±0.349 | 1.27E-03 |
| cg26661623 | 17 | 7019262  | TSS1500                   | <i>ASGR2</i>        | 1.523±0.337  | 1.322±0.366  | 6.96E-03 |
| cg08141989 | 17 | 7082562  | GeneBody/5'UTR/1st exon   | <i>ASGR1</i>        | 1.582±0.161  | 1.709±0.256  | 1.71E-03 |
| cg12228229 | 17 | 7122261  | TSS1500                   | <i>ACADVL</i>       | 1.269±0.181  | 1.461±0.237  | 1.79E-05 |
| cg02740128 | 17 | 7123860  | TSS1500                   | <i>DLG4</i>         | -3.317±0.273 | -3.514±0.311 | 1.48E-03 |
| cg25737491 | 17 | 7145532  | GeneBody/1st intron       | <i>GABARAP</i>      | -4.585±0.541 | -4.994±0.589 | 8.32E-04 |
| cg21287330 | 17 | 7154245  | GeneBody/1st intron       | <i>CTDNEP1</i>      | -4.257±0.336 | -4.502±0.333 | 1.01E-03 |
| cg11212609 | 17 | 7155399  | GeneBody/5'UTR/1st exon   | <i>ELP5</i>         | -4.346±0.191 | -4.478±0.21  | 2.08E-03 |
| cg00901493 | 17 | 7197375  | GeneBody/1st intron       | <i>YBX2</i>         | -3.474±0.26  | -3.693±0.401 | 7.79E-04 |
| cg15215114 | 17 | 7307419  | GeneBody/5'UTR/1st exon   | <i>TMEM256</i>      | -5.035±0.485 | -5.417±0.688 | 1.16E-03 |
| cg03169180 | 17 | 7310347  | TSS1500                   | <i>NLGN2</i>        | 0.534±0.133  | 0.649±0.186  | 3.88E-04 |
| cg23196133 | 17 | 7388063  | GeneBody/5'UTR/1st exon   | <i>POLR2A</i>       | -5.501±0.447 | -5.81±0.499  | 2.09E-03 |
| cg10353436 | 17 | 7476140  | GeneBody/5'UTR/1st exon   | <i>EIF4A1</i>       | -4.685±0.241 | -4.94±0.396  | 5.81E-05 |
| cg21839522 | 17 | 7477238  | TSS1500                   | <i>SNORA48</i>      | -4.953±0.637 | -5.321±0.64  | 7.82E-03 |
| cg08656294 | 17 | 7477240  | TSS1500                   | <i>SNORA48</i>      | -5.398±0.443 | -5.669±0.503 | 6.33E-03 |
| cg00103783 | 17 | 7487249  | GeneBody/1st exon         | <i>MPDU1</i>        | -5.256±0.322 | -5.644±0.454 | 3.31E-06 |
| cg01191395 | 17 | 7530998  | GeneBody/5'UTR/1st exon   | <i>SAT2</i>         | -4.67±0.318  | -5.088±0.432 | 6.21E-07 |
| cg01249910 | 17 | 7531244  | TSS200                    | <i>SHBG</i>         | -3.754±0.276 | -4.01±0.387  | 1.69E-04 |
| cg10043101 | 17 | 7554140  | TSS200                    | <i>ATP1B2</i>       | -5.151±0.49  | -5.568±0.493 | 1.75E-04 |
| cg11519508 | 17 | 7590170  | TSS1500                   | <i>WRAP53</i>       | -4.862±0.594 | -5.192±0.484 | 8.08E-03 |
| cg15206330 | 17 | 7591591  | TSS200                    | <i>WRAP53</i>       | -5.686±0.519 | -6.095±0.547 | 4.83E-04 |
| cg06587969 | 17 | 7591899  | GeneBody/5'UTR/1st exon   | <i>WRAP53</i>       | -5.193±0.556 | -5.645±0.51  | 2.54E-04 |
| cg03644378 | 17 | 7761459  | TSS1500                   | <i>LSMD1</i>        | -4.974±0.481 | -5.366±0.457 | 2.67E-04 |
| cg03386903 | 17 | 7832479  | GeneBody/1st intron       | <i>KCNAB3</i>       | 2.953±0.24   | 3.129±0.242  | 9.87E-04 |
| cg03742272 | 17 | 7990705  | GeneBody/1st exon         | <i>ALOX12B</i>      | 1.29±0.234   | 1.451±0.234  | 1.68E-03 |
| cg10392768 | 17 | 8021828  | GeneBody/5'UTR/1st exon   | <i>ALOXE3</i>       | -4.39±0.309  | -4.775±0.432 | 1.72E-06 |
| cg01980637 | 17 | 8055547  | GeneBody/5'UTR/1st intron | <i>PER1</i>         | -4.39±0.34   | -4.73±0.452  | 4.71E-05 |
| cg16545079 | 17 | 8055888  | TSS200                    | <i>PER1</i>         | -4.901±0.437 | -5.216±0.429 | 1.10E-03 |
| cg02571905 | 17 | 8079626  | GeneBody/5'UTR/1st exon   | <i>TMEM107</i>      | -5.184±0.382 | -5.545±0.419 | 5.55E-05 |
| cg19670317 | 17 | 8093380  | GeneBody/1st exon         | <i>C17orf59</i>     | -4.091±0.194 | -4.258±0.38  | 1.85E-03 |
| cg11009596 | 17 | 8113758  | GeneBody/5'UTR/1st intron | <i>AURKB</i>        | -5.155±0.491 | -5.476±0.447 | 2.38E-03 |
| cg12844497 | 17 | 8114032  | TSS200                    | <i>AURKB</i>        | -4.185±0.387 | -4.439±0.351 | 2.36E-03 |
| cg11178443 | 17 | 8192024  | GeneBody/5'UTR/1st exon   | <i>RANGRF</i>       | -5.235±0.462 | -5.648±0.434 | 7.94E-05 |
| cg09008187 | 17 | 8198627  | TSS1500                   | <i>SLC25A35</i>     | -5.499±0.602 | -5.907±0.55  | 1.72E-03 |
| cg04518106 | 17 | 8286519  | GeneBody/5'UTR/1st exon   | <i>RPL26</i>        | -4.659±0.327 | -4.99±0.51   | 8.10E-05 |
| cg05334253 | 17 | 8338877  | TSS1500                   | <i>NDEL1</i>        | -4.428±0.384 | -4.907±0.466 | 9.75E-07 |
| cg09978128 | 17 | 8339376  | GeneBody/5'UTR/1st intron | <i>NDEL1</i>        | -5.863±0.522 | -6.179±0.581 | 6.50E-03 |
| cg06011292 | 17 | 8534013  | GeneBody/5'UTR/1st exon   | <i>MYH10</i>        | -5.087±0.664 | -5.686±0.585 | 6.33E-05 |
| cg01044722 | 17 | 8534126  | TSS200                    | <i>MYH10</i>        | -4.413±0.373 | -4.71±0.584  | 1.51E-03 |
| cg06468695 | 17 | 8647944  | GeneBody/5'UTR/1st exon   | <i>CCDC42</i>       | 1.959±0.173  | 2.198±0.281  | 6.32E-07 |
| cg22197033 | 17 | 8649004  | TSS1500                   | <i>CCDC42</i>       | -5.106±0.909 | -5.62±0.805  | 7.73E-03 |
| cg13453139 | 17 | 8815262  | GeneBody/5'UTR/1st intron | <i>PIK3R5</i>       | 1.559±0.23   | 1.696±0.231  | 6.08E-03 |
| cg19564877 | 17 | 8925201  | GeneBody/5'UTR/1st intron | <i>NTN1</i>         | -4.39±0.601  | -4.783±0.72  | 4.11E-03 |
| cg04720358 | 17 | 9808263  | GeneBody/1st exon         | <i>RCVRN</i>        | 5.064±0.341  | 5.297±0.369  | 2.19E-03 |
| cg13991233 | 17 | 10102558 | TSS1500                   | <i>GAS7</i>         | -3.285±0.3   | -3.506±0.421 | 2.14E-03 |
| cg19189291 | 17 | 10571935 | 0                         | 0                   | 2.042±0.324  | 2.261±0.371  | 2.77E-03 |
| cg00480209 | 17 | 10600689 | GeneBody/1st exon         | <i>SCO1</i>         | -5.003±0.342 | -5.256±0.254 | 5.35E-04 |
| cg03592161 | 17 | 10601178 | GeneBody/5'UTR/1st intron | <i>ADPRM</i>        | -6.002±0.62  | -6.471±0.563 | 5.65E-04 |
| cg26162695 | 17 | 12921313 | GeneBody/5'UTR/1st exon   | <i>ELAC2</i>        | -5.674±0.737 | -6.292±0.68  | 1.75E-04 |
| cg08011170 | 17 | 12921393 | TSS200                    | <i>ELAC2</i>        | -5.068±0.402 | -5.332±0.349 | 2.16E-03 |
| cg13706352 | 17 | 13972696 | TSS200                    | <i>COX10</i>        | -5.392±0.478 | -5.773±0.491 | 3.96E-04 |
| cg22774127 | 17 | 13972928 | TSS200                    | <i>COX10-AS1</i>    | -5.074±0.421 | -5.46±0.433  | 7.13E-05 |
| cg12110626 | 17 | 15467174 | TSS1500                   | <i>TVP23C-CDRT4</i> | -2.747±0.479 | -3.036±0.557 | 7.35E-03 |
| cg03073814 | 17 | 15902501 | TSS200                    | <i>TTC19</i>        | -4.156±0.396 | -4.532±0.517 | 9.01E-05 |
| cg04223442 | 17 | 16118251 | GeneBody/5'UTR/1st intron | <i>NCOR1</i>        | -4.144±0.239 | -4.303±0.228 | 2.15E-03 |
| cg02550358 | 17 | 16120515 | GeneBody/5'UTR/1st exon   | <i>PIGL</i>         | -4.748±0.504 | -5.122±0.449 | 6.81E-04 |
| cg06537829 | 17 | 16283976 | TSS1500                   | <i>UBB</i>          | -4.395±0.578 | -4.821±0.612 | 1.02E-03 |
| cg08270477 | 17 | 16342776 | TSS200                    | <i>SNORD49B</i>     | -5.42±0.382  | -5.965±0.648 | 5.19E-07 |
| cg03565323 | 17 | 16472866 | TSS1500                   | <i>ZNF287</i>       | -2.546±0.257 | -2.715±0.317 | 4.34E-03 |
| cg00718748 | 17 | 16556871 | GeneBody/5'UTR/1st intron | <i>ZNF624</i>       | -4.909±0.338 | -5.101±0.296 | 7.60E-03 |
| cg10583632 | 17 | 16557199 | TSS200                    | <i>ZNF624</i>       | -5.598±0.516 | -5.949±0.51  | 1.92E-03 |
| cg24170090 | 17 | 16945301 | TSS1500                   | <i>MPRIIP</i>       | -3.94±0.282  | -4.153±0.38  | 1.46E-03 |
| cg25448636 | 17 | 17140084 | GeneBody/5'UTR/1st intron | <i>FLCN</i>         | -4.638±0.314 | -5.039±0.504 | 2.52E-06 |
| cg02975142 | 17 | 17140597 | TSS200                    | <i>FLCN</i>         | -4.485±0.261 | -4.754±0.387 | 4.96E-05 |
| cg22309826 | 17 | 17184440 | GeneBody/1st intron       | <i>COPS3</i>        | -5.395±0.398 | -5.707±0.368 | 3.93E-04 |
| cg15994159 | 17 | 17584505 | TSS1500                   | <i>RAI1</i>         | -4.858±0.29  | -5.028±0.316 | 7.91E-03 |
| cg23159296 | 17 | 17740009 | GeneBody/1st intron       | <i>SREBF1</i>       | -5.788±0.516 | -6.188±0.513 | 5.09E-04 |
| cg16323498 | 17 | 17943126 | GeneBody/1st exon         | <i>GID4</i>         | -5.115±0.47  | -5.436±0.453 | 1.72E-03 |
| cg20131685 | 17 | 18128578 | TSS1500                   | <i>LLGL1</i>        | -4.375±0.365 | -4.739±0.519 | 6.22E-05 |
| cg25558099 | 17 | 18219121 | GeneBody/1st exon         | <i>SMCR8</i>        | -3.852±0.356 | -4.192±0.407 | 5.11E-05 |
| cg16094520 | 17 | 18267123 | TSS1500                   | <i>SHMT1</i>        | -3.612±0.26  | -3.897±0.382 | 1.83E-05 |
| cg15831452 | 17 | 18761345 | TSS200                    | <i>PRPSAP2</i>      | -5.492±0.6   | -5.902±0.547 | 1.61E-03 |
| cg04747863 | 17 | 18761731 | GeneBody/5'UTR/1st intron | <i>PRPSAP2</i>      | -5.393±0.373 | -5.635±0.379 | 3.09E-03 |
| cg05492503 | 17 | 19140765 | GeneBody/5'UTR/1st exon   | <i>EPN2</i>         | -5.028±0.375 | -5.302±0.477 | 1.70E-03 |
| cg02629257 | 17 | 19271627 | GeneBody/5'UTR/1st intron | <i>B9D1</i>         | 2.346±0.272  | 2.508±0.293  | 6.99E-03 |
| cg12353516 | 17 | 19281309 | GeneBody/5'UTR/1st exon   | <i>B9D1</i>         | -4.255±0.282 | -4.593±0.41  | 4.17E-06 |
| cg17332016 | 17 | 19437791 | GeneBody/1st intron       | <i>SLC47A1</i>      | -4.997±0.43  | -5.356±0.534 | 3.97E-04 |
| cg22767735 | 17 | 19551663 | TSS1500                   | <i>ALDH3A2</i>      | -4.784±0.333 | -5.116±0.469 | 6.02E-05 |
| cg09303043 | 17 | 19552393 | GeneBody/1st exon         | <i>ALDH3A2</i>      | -5.769±0.562 | -6.232±0.543 | 2.36E-04 |
| cg22826936 | 17 | 19770443 | GeneBody/1st intron       | <i>ULK2</i>         | -4.766±0.342 | -5.142±0.441 | 9.90E-06 |
| cg02811755 | 17 | 19880691 | GeneBody/1st intron       | <i>AKAP10</i>       | -5.114±0.351 | -5.481±0.384 | 1.18E-05 |
| cg22642718 | 17 | 21318837 | GeneBody                  | <i>KCNJ18</i>       | 3.798±0.226  | 4.055±0.412  | 3.98E-05 |
| cg19383689 | 17 | 25621092 | TSS200                    | <i>WSB1</i>         | -4.753±0.505 | -5.296±0.576 | 9.13E-06 |
| cg02497175 | 17 | 26368598 | TSS1500                   | <i>NLK</i>          | -4.46±0.375  | -4.781±0.301 | 1.10E-04 |
| cg19539519 | 17 | 26553687 | GeneBody/1st exon         | <i>PYY2</i>         | 3.481±0.205  | 3.647±0.349  | 1.85E-03 |
| cg21784498 | 17 | 26645922 | TSS200                    | <i>TMEM97</i>       | -5.809±0.573 | -6.295±0.542 | 1.59E-04 |
| cg01438829 | 17 | 26646651 | GeneBody/1st intron       | <i>TMEM97</i>       | -4.712±0.299 | -4.905±0.333 | 3.85E-03 |
| cg18712119 | 17 | 26662236 | GeneBody/5'UTR/1st intron | <i>IFT20</i>        | -4.921±0.486 | -5.272±0.429 | 8.75E-04 |
| cg06069187 | 17 | 26698283 | TSS1500                   | <i>SARM1</i>        | -2.511±0.55  | -2.868±0.622 | 3.86E-03 |

|             |    |          |                           |            |              |              |          |
|-------------|----|----------|---------------------------|------------|--------------|--------------|----------|
| cg14445437  | 17 | 26898124 | GeneBody                  | PIGS       | -5.065±0.334 | -5.381±0.462 | 1.19E-04 |
| cg15692239  | 17 | 26903955 | TSS200                    | ALDOC      | -5.05±0.47   | -5.358±0.519 | 3.32E-03 |
| cg22686523  | 17 | 26940926 | GeneBody/1st intron       | SGK494     | 1.662±0.437  | 1.386±0.52   | 5.30E-03 |
| cg09076584  | 17 | 26941253 | TSS200                    | SGK494     | 1.746±0.258  | 1.908±0.283  | 4.72E-03 |
| cg11553177  | 17 | 26988816 | GeneBody/1st exon         | SDF2       | -5.707±0.502 | -6.049±0.494 | 1.87E-03 |
| cg19462352  | 17 | 27038664 | GeneBody/1st exon         | PROCA1     | -5.032±0.337 | -5.296±0.46  | 1.10E-03 |
| cg26787505  | 17 | 27053695 | GeneBody/1st intron       | TLCD1      | -5.516±0.56  | -6.14±0.619  | 4.65E-06 |
| cg12971338  | 17 | 27070618 | TSS1500                   | TRAF4      | -4.407±0.334 | -4.607±0.347 | 6.29E-03 |
| cg21069922  | 17 | 27182342 | GeneBody/1st intron       | ERAL1      | -4.404±0.528 | -4.876±0.6   | 1.28E-04 |
| cg17568035  | 17 | 27224811 | TSS200                    | FLOT2      | -5.006±0.512 | -5.355±0.616 | 2.90E-03 |
| cg10671802  | 17 | 27230278 | TSS200                    | DHRS13     | -4.36±0.25   | -4.733±0.423 | 1.80E-07 |
| cg13564075  | 17 | 27278810 | TSS1500                   | PHF12      | -5.4±0.471   | -5.789±0.621 | 5.32E-04 |
| cg11780934  | 17 | 27920081 | TSS1500                   | ANKRD13B   | -4.784±0.387 | -5.087±0.371 | 4.24E-04 |
| cg01491540  | 17 | 28256424 | TSS1500                   | EFCAB5     | -4.766±0.361 | -5.152±0.48  | 1.74E-05 |
| cg18700967  | 17 | 28257024 | TSS200                    | SSH2       | -4.659±0.682 | -5.362±0.653 | 1.10E-05 |
| cg05141870  | 17 | 28444127 | GeneBody/1st exon         | MIR423     | -4.653±0.453 | -5.075±0.47  | 5.75E-05 |
| cg02226939  | 17 | 28619481 | TSS1500                   | BLMH       | -3.111±0.304 | -3.298±0.333 | 5.51E-03 |
| cg07156669  | 17 | 28705245 | TSS1500                   | CPD        | -0.894±0.294 | -1.081±0.265 | 3.04E-03 |
| cg06488505  | 17 | 28934075 | GeneBody                  | LRRC37BP1  | 1.512±0.26   | 1.331±0.373  | 3.83E-03 |
| cg20525549  | 17 | 29151924 | TSS200                    | CRLF3      | -4.189±0.321 | -4.438±0.48  | 1.65E-03 |
| cg18469326  | 17 | 29158893 | TSS200                    | ATAD5      | -4.686±0.356 | -4.995±0.445 | 2.47E-04 |
| cg00948524  | 17 | 29297757 | TSS200                    | RNF135     | -4.151±0.336 | -4.444±0.462 | 3.30E-04 |
| cg13759778  | 17 | 29624439 | TSS200                    | OMG        | 2.078±0.325  | 2.308±0.289  | 1.08E-03 |
| cg16910379  | 17 | 30186525 | TSS200                    | COPRS      | -4.175±0.463 | -4.733±0.649 | 3.12E-06 |
| cg18042079  | 17 | 30229074 | TSS1500                   | UTP6       | -3.869±0.289 | -4.12±0.46   | 6.36E-04 |
| cg27288777  | 17 | 30264551 | GeneBody/1st intron       | SUZ12      | -4.342±0.335 | -4.6±0.452   | 1.23E-03 |
| cg16007628  | 17 | 30677100 | TSS200                    | MIR632     | -3.297±0.385 | -3.639±0.589 | 4.16E-04 |
| cg13843603  | 17 | 30771994 | GeneBody/1st intron       | PSMD11     | -4.55±0.28   | -4.876±0.48  | 1.72E-05 |
| cg07658718  | 17 | 30814514 | GeneBody/5'UTR            | CDK5R1     | -3.874±0.334 | -4.087±0.287 | 2.78E-03 |
| cg18338311  | 17 | 32907939 | GeneBody/5'UTR/1st exon   | TMEM132E   | -2.976±0.222 | -3.142±0.425 | 6.01E-03 |
| cg11221508  | 17 | 33288337 | GeneBody/1st exon         | CCT6B      | -5.456±0.622 | -5.841±0.5   | 3.31E-03 |
| cg09263755  | 17 | 33288932 | GeneBody/1st exon         | ZNF830     | -4.399±0.297 | -4.644±0.345 | 3.78E-04 |
| cg01151686  | 17 | 33307622 | GeneBody/5'UTR/1st exon   | LIG3       | -5.846±0.715 | -6.27±0.639  | 5.41E-03 |
| cg02740947  | 17 | 33446536 | GeneBody/1st intron       | RAD51D     | -4.398±0.313 | -4.632±0.329 | 8.51E-04 |
| cg16296356  | 17 | 33447110 | TSS1500                   | RAD51D     | -1.903±0.441 | -1.55±0.658  | 1.18E-03 |
| cg03363175  | 17 | 33468875 | GeneBody                  | NLE1       | -5.176±0.363 | -5.47±0.396  | 3.83E-04 |
| cg08764758  | 17 | 33700230 | GeneBody/5'UTR/1st intron | SLFN11     | -4.837±0.418 | -5.151±0.394 | 6.52E-04 |
| cg00425792  | 17 | 33905503 | GeneBody/5'UTR/1st exon   | PEX12      | -3.847±0.274 | -4.024±0.242 | 2.60E-03 |
| cg21116410  | 17 | 33905650 | GeneBody/5'UTR/1st exon   | PEX12      | -5.563±0.551 | -5.903±0.531 | 4.31E-03 |
| cg07628086  | 17 | 33914258 | TSS200                    | AP2B1      | -5.336±0.412 | -5.837±0.642 | 4.70E-06 |
| cg23996241  | 17 | 33914362 | GeneBody/5'UTR/1st exon   | AP2B1      | -4.232±0.277 | -4.461±0.364 | 5.30E-04 |
| cg00021527  | 17 | 34136180 | TSS1500                   | TAF15      | -4.472±0.579 | -5.085±0.565 | 7.64E-06 |
| cg15532088  | 17 | 34195134 | GeneBody/1st intron       | C17orf66   | 2.056±0.175  | 2.228±0.271  | 1.12E-04 |
| cg12455187  | 17 | 34208503 | TSS1500                   | CCL5       | 1.489±0.243  | 1.142±0.55   | 5.91E-06 |
| cg16574065  | 17 | 34257726 | GeneBody/1st exon         | RDM1       | -4.231±0.246 | -4.425±0.314 | 8.09E-04 |
| cg14532417  | 17 | 34503322 | GeneBody/5'UTR/1st intron | TBC1D3B    | 1.728±0.192  | 1.867±0.291  | 3.42E-03 |
| cg23350580  | 17 | 34592075 | TSS200                    | TBC1D3C    | 1.485±0.147  | 1.582±0.229  | 7.96E-03 |
| cg24473385  | 17 | 34842439 | TSS200                    | ZNHIT3     | -5.685±0.555 | -6.195±0.495 | 5.05E-05 |
| cg16544272  | 17 | 34891014 | GeneBody/5'UTR            | MYO19      | -4.938±0.557 | -5.425±0.576 | 1.33E-04 |
| cg24073161  | 17 | 34900233 | TSS1500                   | GGNBP2     | -4.883±0.542 | -5.231±0.568 | 3.54E-03 |
| cg19678067  | 17 | 34901173 | GeneBody/5'UTR/1st intron | GGNBP2     | -3.742±0.234 | -3.918±0.417 | 4.40E-03 |
| cg11976048  | 17 | 34948329 | GeneBody/5'UTR/1st exon   | DHRS11     | -5.518±0.604 | -6.014±0.607 | 2.70E-04 |
| cg20139214  | 17 | 35767334 | GeneBody/5'UTR/1st exon   | TADA2A     | -4.725±0.339 | -4.951±0.261 | 1.68E-03 |
| cg02987163  | 17 | 35849291 | TSS1500                   | DUSP14     | -3.821±0.324 | -4.08±0.383  | 5.38E-04 |
| cg02102644  | 17 | 35969361 | GeneBody/1st exon         | SYNRG      | -4.97±0.469  | -5.321±0.489 | 8.22E-04 |
| cg20904141  | 17 | 36453131 | GeneBody/5'UTR/1st exon   | MRPL45     | -4.969±0.322 | -5.203±0.325 | 1.01E-03 |
| cg20228512  | 17 | 36904069 | GeneBody/5'UTR            | PCGF2      | -6.242±0.52  | -6.592±0.59  | 2.76E-03 |
| cg00089071  | 17 | 36905809 | TSS1500                   | PCGF2      | -5.805±0.595 | -6.211±0.721 | 2.93E-03 |
| cg13824734  | 17 | 36909238 | GeneBody/1st intron       | PSMB3      | -4.885±0.312 | -5.141±0.282 | 2.26E-04 |
| cg12247247  | 17 | 37009861 | GeneBody/1st intron       | RPL23      | -3.433±0.592 | -3.85±0.619  | 1.52E-03 |
| cg02060988  | 17 | 37025978 | TSS200                    | LASP1      | -5.175±0.364 | -5.711±0.577 | 1.46E-07 |
| cg12446644  | 17 | 37026641 | GeneBody/5'UTR/1st intron | LASP1      | -4.103±0.486 | -4.475±0.461 | 5.31E-04 |
| cg23580945  | 17 | 37186341 | GeneBody/1st exon         | LRRC37A11P | 2.206±0.236  | 2.353±0.325  | 8.55E-03 |
| cg13501999  | 17 | 37353838 | GeneBody/5'UTR/1st exon   | CACNB1     | -4.718±0.567 | -5.058±0.473 | 4.45E-03 |
| cg21309147  | 17 | 37382234 | TSS200                    | STAC2      | -3.891±0.422 | -4.208±0.639 | 2.31E-03 |
| cg05798972  | 17 | 37607105 | GeneBody/1st intron       | MED1       | -3.597±0.259 | -3.792±0.323 | 1.21E-03 |
| cg12477119  | 17 | 37617470 | TSS1500                   | CDK12      | -2.164±0.377 | -1.859±0.695 | 2.54E-03 |
| cg10398950  | 17 | 37618454 | GeneBody/1st exon         | CDK12      | -4.57±0.26   | -4.771±0.26  | 5.49E-04 |
| cg11634198  | 17 | 37764158 | GeneBody/5'UTR/1st exon   | NEUROD2    | -2.018±0.163 | -2.134±0.205 | 2.05E-03 |
| cg23894539  | 17 | 37793518 | GeneBody/5'UTR/1st intron | STAR3D     | -5.301±0.475 | -5.814±0.648 | 1.62E-05 |
| cg24649641  | 17 | 37844119 | GeneBody/1st exon         | PGAP3      | -4.606±0.341 | -4.833±0.311 | 2.00E-03 |
| cg16332577  | 17 | 37886349 | GeneBody                  | MIEN1      | -2.426±0.26  | -2.587±0.322 | 6.92E-03 |
| cg19895197  | 17 | 37887061 | TSS1500                   | MIEN1      | -4.257±0.306 | -4.482±0.297 | 8.52E-04 |
| cg13878456  | 17 | 38020344 | GeneBody/1st intron       | IKZF3      | -1.589±0.242 | -1.749±0.234 | 2.38E-03 |
| cg10057218  | 17 | 38074149 | TSS1500                   | GSDMB      | 2.362±0.207  | 2.567±0.294  | 7.30E-05 |
| cg19511844  | 17 | 38084119 | TSS1500                   | ORMDL3     | -3.307±0.332 | -3.537±0.448 | 3.48E-03 |
| cg21491028  | 17 | 38136817 | TSS1500                   | PSMD3      | -4.448±0.626 | -4.846±0.607 | 3.42E-03 |
| cg03812679  | 17 | 38170632 | TSS1500                   | CSF3       | -4.285±0.307 | -4.595±0.467 | 7.34E-05 |
| cg07313155  | 17 | 38218601 | GeneBody/5'UTR/1st exon   | THRA       | -3.653±0.319 | -4.009±0.453 | 1.14E-05 |
| cg09634802  | 17 | 38219592 | GeneBody/5'UTR/1st intron | THRA       | -4.561±0.307 | -4.872±0.531 | 1.45E-04 |
| cg22640452  | 17 | 38256967 | GeneBody/5'UTR/1st exon   | NR1D1      | -5.356±0.477 | -5.786±0.553 | 1.19E-04 |
| cg03359285  | 17 | 38573811 | GeneBody/1st intron       | TOP2A      | -4.461±0.401 | -4.799±0.469 | 2.86E-04 |
| cg00512374  | 17 | 38599682 | GeneBody/5'UTR/1st exon   | IGFBP4     | -4.44±0.303  | -4.671±0.428 | 1.63E-03 |
| cg08074477  | 17 | 38657949 | TSS200                    | TNS4       | 0.373±0.122  | 0.461±0.15   | 1.80E-03 |
| cg25543676  | 17 | 38803968 | GeneBody/5'UTR/1st intron | SMARCE1    | -4.823±0.396 | -5.075±0.573 | 8.34E-03 |
| cg08048656  | 17 | 38804199 | TSS200                    | SMARCE1    | -4.901±0.31  | -5.183±0.297 | 6.75E-05 |
| cg20484002  | 17 | 38956500 | TSS1500                   | KRT28      | 1.385±0.322  | 1.634±0.296  | 4.48E-04 |
| cg22805632  | 17 | 38978827 | GeneBody/1st exon         | KRT10      | 2.151±0.251  | 2.478±0.325  | 6.13E-07 |
| cg09088193  | 17 | 39122765 | GeneBody/1st exon         | KRT39      | 2.372±0.322  | 2.592±0.254  | 1.33E-03 |
| cg15312323  | 17 | 39317694 | TSS1500                   | KRTAP4-4   | 0.48±0.255   | 0.235±0.367  | 1.13E-04 |
| cg23205633  | 17 | 39334352 | GeneBody/1st exon         | KRTAP4-2   | 1.025±0.16   | 1.124±0.202  | 7.20E-03 |
| cg117110560 | 17 | 39389144 | GeneBody/1st exon         | KRTAP9-3   | 2.35±0.161   | 2.534±0.23   | 8.56E-06 |
| cg18370227  | 17 | 39507261 | TSS200                    | KRT33A     | 2.639±0.294  | 2.807±0.231  | 6.30E-03 |
| cg14533138  | 17 | 39525921 | GeneBody/1st exon         | KRT33B     | 1.779±0.214  | 1.914±0.262  | 5.86E-03 |
| cg04618528  | 17 | 39645876 | GeneBody/1st exon         | KRT36      | 2.594±0.156  | 2.761±0.257  | 5.52E-05 |

|            |    |          |                           |          |              |              |          |
|------------|----|----------|---------------------------|----------|--------------|--------------|----------|
| cg01602596 | 17 | 39743526 | TSS1500                   | KRT14    | 1.101±0.153  | 1.273±0.21   | 9.59E-06 |
| cg17547537 | 17 | 39845544 | GeneBody/1st intron       | EIF1     | -4.856±0.542 | -5.196±0.475 | 3.32E-03 |
| cg05325699 | 17 | 39890756 | GeneBody/1st exon         | HAP1     | -3.947±0.275 | -4.186±0.413 | 4.68E-04 |
| cg10154926 | 17 | 39891009 | TSS200                    | HAP1     | -4.718±0.464 | -5.076±0.532 | 7.38E-04 |
| cg17388484 | 17 | 39943043 | TSS200                    | JUP      | -3.983±0.401 | -4.297±0.593 | 1.41E-03 |
| cg01131735 | 17 | 39968419 | GeneBody/5'UTR/1st exon   | LEPREL4  | -5.424±0.506 | -5.729±0.442 | 4.71E-03 |
| cg14529146 | 17 | 39968600 | TSS200                    | LEPREL4  | -3.891±0.618 | -4.323±0.635 | 1.60E-03 |
| cg05288569 | 17 | 40021733 | TSS200                    | KLHL11   | -5.211±0.403 | -5.445±0.431 | 8.22E-03 |
| cg24124398 | 17 | 40075096 | GeneBody/5'UTR/1st intron | ACLY     | -5.699±0.397 | -5.949±0.383 | 3.65E-03 |
| cg03958344 | 17 | 40118638 | TSS200                    | CNP      | -5.36±0.396  | -5.882±0.595 | 9.61E-07 |
| cg23866755 | 17 | 40119337 | GeneBody/1st intron       | CNP      | -4.266±0.295 | -4.592±0.39  | 1.01E-05 |
| cg24505527 | 17 | 40168900 | GeneBody/5'UTR/1st intron | DNAJC7   | -5.087±0.644 | -5.479±0.55  | 4.12E-03 |
| cg21371335 | 17 | 40170049 | TSS1500                   | DNAJC7   | -3.678±0.425 | -3.936±0.572 | 9.84E-03 |
| cg10708793 | 17 | 40264626 | GeneBody/5'UTR/1st exon   | DHX58    | -4.8±0.44    | -5.076±0.518 | 5.63E-03 |
| cg16762195 | 17 | 40264815 | TSS200                    | DHX58    | -4.401±0.339 | -4.719±0.433 | 9.59E-05 |
| cg23559331 | 17 | 40332958 | GeneBody/1st exon         | KCNH4    | -3.232±0.267 | -3.444±0.402 | 1.34E-03 |
| cg04745805 | 17 | 40427474 | GeneBody/5'UTR/1st intron | STAT5B   | -3.669±0.283 | -3.866±0.342 | 2.41E-03 |
| cg05780311 | 17 | 40428759 | TSS1500                   | STAT5B   | -5.469±0.426 | -5.807±0.394 | 3.46E-04 |
| cg18112163 | 17 | 40540197 | GeneBody/5'UTR/1st intron | STAT3    | -4.941±0.609 | -5.466±0.511 | 1.04E-04 |
| cg20716209 | 17 | 40541270 | TSS1500                   | STAT3    | -4.091±0.389 | -4.485±0.487 | 3.12E-05 |
| cg13353683 | 17 | 40574819 | GeneBody/1st exon         | PTRF     | -4.669±0.385 | -4.95±0.461  | 1.50E-03 |
| cg20082357 | 17 | 40611017 | GeneBody/5'UTR/1st intron | ATP6V0A1 | -5.78±0.472  | -6.167±0.495 | 3.06E-04 |
| cg25664725 | 17 | 40688138 | GeneBody/5'UTR/1st exon   | NAGLU    | -5.466±0.436 | -6.006±0.579 | 1.55E-06 |
| cg08792314 | 17 | 40714406 | GeneBody/5'UTR/1st exon   | COASY    | -4.747±0.531 | -5.122±0.582 | 1.64E-03 |
| cg12628062 | 17 | 40729398 | GeneBody/1st intron       | PSMC3IP  | -4.686±0.433 | -5.175±0.505 | 4.46E-06 |
| cg17248183 | 17 | 40761138 | TSS1500                   | TUBG1    | -4.733±0.56  | -5.144±0.628 | 1.20E-03 |
| cg05401645 | 17 | 40761567 | TSS200                    | FAM134C  | -5.929±0.388 | -6.646±0.657 | 2.79E-09 |
| cg14275779 | 17 | 40830236 | TSS1500                   | PLEKHH3  | -4.58±0.336  | -4.98±0.508  | 5.65E-06 |
| cg06975499 | 17 | 40896881 | GeneBody/5'UTR/1st intron | EZH1     | -4.12±0.523  | -4.42±0.457  | 6.78E-03 |
| cg26990660 | 17 | 40913221 | GeneBody/5'UTR/1st exon   | RAMP2    | -4.13±0.509  | -4.587±0.578 | 1.16E-04 |
| cg20770803 | 17 | 40950659 | GeneBody/1st exon         | COA3     | -4.913±0.267 | -5.145±0.527 | 1.77E-03 |
| cg22325715 | 17 | 40951156 | GeneBody/1st exon         | CNTD1    | 3.602±0.246  | 3.888±0.371  | 8.67E-06 |
| cg16225441 | 17 | 40976328 | TSS200                    | BECN1    | -2.448±0.322 | -2.159±0.349 | 1.05E-04 |
| cg18702234 | 17 | 40985921 | GeneBody/1st intron       | PSME3    | -3.771±0.215 | -3.925±0.357 | 4.84E-03 |
| cg04429140 | 17 | 41132427 | GeneBody/5'UTR/1st exon   | PTGES3L  | -5.006±0.504 | -5.335±0.516 | 3.00E-03 |
| cg07080007 | 17 | 41150154 | TSS1500                   | RPL27    | -4.246±0.485 | -4.558±0.48  | 3.16E-03 |
| cg12556991 | 17 | 41150487 | GeneBody/5'UTR/1st exon   | RPL27    | -4.03±0.606  | -4.581±0.843 | 2.02E-04 |
| cg21902119 | 17 | 41173883 | GeneBody/1st intron       | VAT1     | -5.171±0.464 | -5.514±0.443 | 7.79E-04 |
| cg15945602 | 17 | 41175317 | TSS1500                   | VAT1     | 1.573±0.134  | 1.679±0.31   | 9.08E-03 |
| cg22325646 | 17 | 41176469 | TSS1500                   | RND2     | -4.051±0.413 | -4.296±0.446 | 7.34E-03 |
| cg19531713 | 17 | 41277059 | GeneBody/1st intron       | BRCA1    | -2.936±0.219 | -3.136±0.375 | 5.25E-04 |
| cg04658354 | 17 | 41277444 | GeneBody/5'UTR/1st exon   | BRCA1    | -3.653±0.446 | -3.94±0.536  | 4.68E-03 |
| cg04482110 | 17 | 41364121 | GeneBody/5'UTR/1st intron | TMEM106A | -3.988±0.498 | -4.457±0.441 | 3.53E-05 |
| cg05011232 | 17 | 41622925 | GeneBody/5'UTR/1st intron | ETV4     | -4.383±0.3   | -4.62±0.491  | 1.95E-03 |
| cg24679082 | 17 | 41623840 | TSS200                    | ETV4     | -4.817±0.493 | -5.134±0.558 | 4.08E-03 |
| cg24229819 | 17 | 41856238 | GeneBody/1st exon         | DUSP3    | -4.765±0.379 | -5.136±0.516 | 6.70E-05 |
| cg16366323 | 17 | 41856855 | TSS1500                   | DUSP3    | -4.114±0.375 | -4.444±0.521 | 3.04E-04 |
| cg07112154 | 17 | 41985074 | GeneBody/5'UTR/1st exon   | MPP2     | -2.732±0.205 | -2.562±0.286 | 6.30E-04 |
| cg20286074 | 17 | 41994536 | TSS200                    | FAM215A  | -0.399±0.255 | -0.572±0.298 | 2.83E-03 |
| cg04879235 | 17 | 42018862 | GeneBody                  | PPY      | 2.284±0.254  | 2.465±0.326  | 2.24E-03 |
| cg12259256 | 17 | 42092431 | TSS200                    | TMEM101  | -4.095±0.414 | -4.359±0.599 | 8.22E-03 |
| cg24682149 | 17 | 42143817 | GeneBody                  | LSM12    | -4.371±0.43  | -4.662±0.532 | 3.23E-03 |
| cg22140675 | 17 | 42147960 | TSS200                    | G6PC3    | -3.409±0.564 | -3.815±0.617 | 1.36E-03 |
| cg06808983 | 17 | 42148292 | GeneBody/1st exon         | G6PC3    | -5.077±0.551 | -5.549±0.569 | 1.64E-04 |
| cg07371290 | 17 | 42200522 | GeneBody/5'UTR/1st intron | HDAC5    | -4.752±0.339 | -5.072±0.36  | 5.00E-05 |
| cg02527529 | 17 | 42219679 | GeneBody/1st intron       | C17orf53 | -5.923±0.523 | -6.332±0.543 | 5.02E-04 |
| cg26852159 | 17 | 42247797 | TSS1500                   | ASB16    | 3.028±0.23   | 3.157±0.208  | 8.50E-03 |
| cg21038703 | 17 | 42248358 | GeneBody/1st exon         | ASB16    | 0.542±0.222  | 0.689±0.279  | 4.14E-03 |
| cg24615044 | 17 | 42264691 | GeneBody/5'UTR/1st exon   | TMUB2    | -4.662±0.344 | -4.915±0.416 | 1.45E-03 |
| cg10183248 | 17 | 42295591 | GeneBody                  | UBTF     | -4.372±0.292 | -4.673±0.415 | 4.07E-05 |
| cg24497270 | 17 | 42401753 | GeneBody/5'UTR/1st intron | SLC25A39 | -5.8±0.514   | -6.3±0.534   | 3.18E-05 |
| cg11999384 | 17 | 42422811 | GeneBody/5'UTR/1st intron | GRN      | -4.765±0.521 | -5.081±0.521 | 5.39E-03 |
| cg17749520 | 17 | 42466567 | GeneBody/1st intron       | ITGA2B   | 3.232±0.163  | 3.333±0.185  | 5.79E-03 |
| cg02505689 | 17 | 42785825 | TSS200                    | DBF4B    | -5.075±0.547 | -5.673±0.598 | 6.15E-06 |
| cg06759215 | 17 | 42786055 | GeneBody/1st exon         | DBF4B    | -4.733±0.387 | -5.121±0.414 | 2.14E-05 |
| cg20163288 | 17 | 42908052 | GeneBody/5'UTR/1st exon   | GJC1     | -3.914±0.363 | -4.198±0.409 | 6.17E-04 |
| cg15077637 | 17 | 42977401 | GeneBody/5'UTR/1st intron | CDC103   | -3.962±0.367 | -4.193±0.35  | 3.59E-03 |
| cg21452443 | 17 | 43138359 | GeneBody/5'UTR/1st exon   | DCAKD    | -4.954±0.297 | -5.213±0.289 | 1.22E-04 |
| cg00405568 | 17 | 43138965 | GeneBody/1st intron       | NMT1     | -4.124±0.641 | -4.525±0.512 | 3.02E-03 |
| cg19655070 | 17 | 43237981 | TSS1500                   | HEXIM2   | -2.945±0.553 | -3.335±0.612 | 1.76E-03 |
| cg15639951 | 17 | 43367609 | GeneBody                  | MAP3K14  | 1.006±0.245  | 1.164±0.294  | 4.48E-03 |
| cg04856689 | 17 | 43862032 | GeneBody/1st intron       | CRHR1    | -3.592±0.532 | -4.109±0.739 | 8.42E-05 |
| cg17630833 | 17 | 43971561 | TSS200                    | MAPT     | -4.725±0.397 | -5.176±0.615 | 1.36E-05 |
| cg23202277 | 17 | 43971911 | GeneBody/5'UTR/1st exon   | MAPT     | -4.879±0.62  | -5.49±0.665  | 2.83E-05 |
| cg07879727 | 17 | 44896017 | GeneBody/5'UTR/1st exon   | WNT3     | -4.336±0.357 | -4.581±0.382 | 2.05E-03 |
| cg13940405 | 17 | 45000277 | TSS1500                   | GOSR2    | -4.984±0.407 | -5.275±0.601 | 3.43E-03 |
| cg08269321 | 17 | 45056057 | GeneBody/1st exon         | RPRML    | -4.536±0.432 | -4.874±0.458 | 5.17E-04 |
| cg05114625 | 17 | 45266880 | TSS1500                   | CDC27    | -5.032±0.543 | -5.558±0.627 | 4.43E-05 |
| cg06048156 | 17 | 45331531 | GeneBody/1st intron       | ITGB3    | -5.475±0.52  | -5.842±0.526 | 1.41E-03 |
| cg00725143 | 17 | 45608199 | TSS1500                   | NPEPPS   | -4.47±0.389  | -4.936±0.503 | 2.42E-06 |
| cg19573464 | 17 | 45726674 | TSS1500                   | KPNB1    | -5.3±0.395   | -5.524±0.37  | 8.22E-03 |
| cg08736146 | 17 | 45908635 | GeneBody/1st intron       | MRPL10   | -4.836±0.359 | -5.106±0.477 | 1.47E-03 |
| cg24793903 | 17 | 45918221 | GeneBody/5'UTR/1st intron | SCRN2    | -5.311±0.377 | -5.545±0.385 | 4.43E-03 |
| cg00177698 | 17 | 46018875 | TSS200                    | PNPO     | -4.073±0.247 | -4.356±0.39  | 1.33E-05 |
| cg06740897 | 17 | 46124821 | TSS1500                   | NFE2L1   | -3.477±0.453 | -3.899±0.541 | 8.62E-05 |
| cg03777405 | 17 | 46125833 | GeneBody/5'UTR/1st intron | NFE2L1   | -3.899±0.463 | -4.396±0.69  | 2.73E-05 |
| cg11194725 | 17 | 46178360 | GeneBody/5'UTR/1st exon   | CBX1     | -4.582±0.464 | -4.85±0.478  | 8.19E-03 |
| cg17778721 | 17 | 46178745 | GeneBody/5'UTR/1st exon   | CBX1     | -4.532±0.522 | -4.844±0.497 | 5.52E-03 |
| cg12563480 | 17 | 46184629 | TSS1500                   | SNX11    | -4.266±0.42  | -4.568±0.551 | 2.20E-03 |
| cg25145670 | 17 | 46655164 | GeneBody/1st intron       | HOXB4    | -2.205±0.34  | -2.563±0.367 | 1.05E-05 |
| cg02422694 | 17 | 46655790 | TSS200                    | HOXB4    | -3.631±0.271 | -3.798±0.332 | 6.97E-03 |
| cg21460081 | 17 | 46656012 | TSS1500                   | HOXB4    | -3.606±0.295 | -3.793±0.376 | 6.00E-03 |
| cg09357097 | 17 | 46688490 | TSS200                    | HOXB7    | -3.046±0.266 | -3.215±0.278 | 3.96E-03 |
| cg25928579 | 17 | 46692534 | TSS1500                   | HOXB8    | -3.527±0.336 | -3.758±0.378 | 2.27E-03 |
| cg13643585 | 17 | 46704004 | TSS200                    | HOXB9    | -4.401±0.345 | -4.629±0.457 | 4.79E-03 |

|            |    |          |                           |          |              |              |          |
|------------|----|----------|---------------------------|----------|--------------|--------------|----------|
| cg21842478 | 17 | 46806046 | GeneBody/5'UTR/1st exon   | HOXB13   | -4.506±0.478 | -4.941±0.632 | 1.66E-04 |
| cg08901867 | 17 | 46871042 | GeneBody/1st intron       | TLL6     | 2.099±0.328  | 1.882±0.373  | 3.22E-03 |
| cg04154812 | 17 | 46908209 | TSS200                    | CALCOCO2 | -2.468±0.221 | -2.611±0.267 | 4.62E-03 |
| cg13362403 | 17 | 46986293 | GeneBody/1st intron       | UBE2Z    | -4.164±0.538 | -4.551±0.531 | 1.10E-03 |
| cg26022315 | 17 | 47021804 | GeneBody/1st intron       | SNF8     | -4.498±0.354 | -4.834±0.489 | 1.10E-04 |
| cg20551517 | 17 | 47046292 | TSS1500                   | GIP      | 2.004±0.152  | 2.124±0.209  | 1.10E-03 |
| cg20233029 | 17 | 47209827 | GeneBody/5'UTR/1st exon   | B4GALNT2 | -2.993±0.419 | -3.243±0.447 | 6.72E-03 |
| cg20858478 | 17 | 47210276 | TSS200                    | B4GALNT2 | -4.109±0.456 | -4.501±0.525 | 2.14E-04 |
| cg17839611 | 17 | 47286802 | TSS200                    | GNGT2    | 0.776±0.154  | 0.926±0.27   | 2.75E-04 |
| cg19267846 | 17 | 47307954 | GeneBody/5'UTR/1st exon   | PHOSPHO1 | -4.89±0.356  | -5.138±0.582 | 5.98E-03 |
| cg20887455 | 17 | 47491840 | GeneBody/5'UTR/1st intron | PHB      | -4.734±0.406 | -4.998±0.287 | 1.87E-03 |
| cg01446983 | 17 | 47754976 | GeneBody/5'UTR/1st intron | SPOP     | -6.019±0.577 | -6.552±0.539 | 5.12E-05 |
| cg06291334 | 17 | 47755771 | TSS1500                   | SPOP     | -3.092±0.36  | -3.325±0.481 | 6.01E-03 |
| cg23576473 | 17 | 47785586 | TSS1500                   | SLC35B1  | -4.814±0.4   | -5.18±0.633  | 3.31E-04 |
| cg19668255 | 17 | 47840643 | GeneBody/1st intron       | FAM117A  | -4.165±0.406 | -4.503±0.52  | 4.39E-04 |
| cg18104321 | 17 | 47866115 | GeneBody/5'UTR/1st exon   | KAT7     | -5.285±0.449 | -5.607±0.36  | 8.22E-04 |
| cg03072378 | 17 | 48046738 | GeneBody/5'UTR/1st exon   | DLX4     | -3.987±0.274 | -4.204±0.38  | 9.96E-04 |
| cg14737977 | 17 | 48134226 | GeneBody/1st intron       | ITGA3    | -4.165±0.594 | -4.61±0.503  | 5.62E-04 |
| cg02668984 | 17 | 48172022 | TSS200                    | PDK2     | -4.061±0.269 | -4.396±0.358 | 1.42E-06 |
| cg01593886 | 17 | 48278778 | GeneBody/1st exon         | COL1A1   | -3.393±0.386 | -3.625±0.485 | 8.86E-03 |
| cg07231132 | 17 | 48350498 | TSS1500                   | TMEM92   | -3.703±0.351 | -3.936±0.474 | 4.75E-03 |
| cg20572838 | 17 | 48450745 | GeneBody/5'UTR/1st intron | EME1     | -4.457±0.344 | -4.658±0.315 | 6.21E-03 |
| cg07569756 | 17 | 48474564 | GeneBody/1st intron       | LRRC59   | -4.695±0.337 | -5.088±0.488 | 6.37E-06 |
| cg18006085 | 17 | 48474872 | GeneBody/5'UTR/1st exon   | LRRC59   | -5.126±0.464 | -5.483±0.646 | 1.37E-03 |
| cg02516388 | 17 | 48503634 | GeneBody/1st exon         | ACSF2    | -4.924±0.383 | -5.447±0.559 | 4.45E-07 |
| cg16413777 | 17 | 48555933 | TSS1500                   | RSAD1    | -4.165±0.41  | -4.498±0.394 | 2.81E-04 |
| cg01428361 | 17 | 48556460 | GeneBody/1st intron       | RSAD1    | -5.424±0.645 | -5.938±0.589 | 3.21E-04 |
| cg24006361 | 17 | 48610255 | GeneBody/5'UTR/1st exon   | EPN3     | -4.193±0.299 | -4.399±0.392 | 3.23E-03 |
| cg27465858 | 17 | 48785406 | TSS200                    | ANKRD40  | -3.585±0.33  | -3.861±0.418 | 4.03E-04 |
| cg09514188 | 17 | 48942734 | GeneBody/5'UTR/1st intron | TOB1     | -4.463±0.418 | -4.914±0.557 | 1.47E-05 |
| cg25716740 | 17 | 49337652 | TSS1500                   | MBTD1    | -5.406±0.519 | -5.828±0.459 | 2.40E-04 |
| cg27207041 | 17 | 49338682 | GeneBody/1st intron       | UTP18    | -3.813±0.256 | -4.009±0.468 | 4.17E-03 |
| cg16950616 | 17 | 53045046 | GeneBody/1st intron       | COX11    | -2.506±0.19  | -2.633±0.308 | 7.74E-03 |
| cg23837897 | 17 | 53046270 | GeneBody/5'UTR/1st intron | STXBP4   | -4.593±0.262 | -4.761±0.25  | 3.09E-03 |
| cg15002214 | 17 | 54670370 | TSS1500                   | NOG      | -5.447±0.675 | -6.064±0.637 | 5.96E-05 |
| cg20676542 | 17 | 54991456 | TSS200                    | TRIM25   | -4.558±0.456 | -4.933±0.678 | 8.90E-04 |
| cg01776246 | 17 | 55038508 | TSS200                    | COIL     | -3.718±0.539 | -4.078±0.634 | 3.29E-03 |
| cg07833382 | 17 | 55055134 | TSS1500                   | SCPEP1   | -2.935±0.475 | -3.253±0.59  | 3.59E-03 |
| cg21409722 | 17 | 55162050 | TSS1500                   | AKAP1    | -3.375±0.55  | -3.791±0.639 | 9.45E-04 |
| cg20736065 | 17 | 55334276 | TSS200                    | MSI2     | -5.662±0.538 | -6.061±0.544 | 8.41E-04 |
| cg06957329 | 17 | 55927468 | TSS200                    | MRPS23   | -5.014±0.467 | -5.337±0.493 | 1.87E-03 |
| cg06723357 | 17 | 55981642 | TSS1500                   | CUEDC1   | 0.312±0.405  | -0.115±0.553 | 2.44E-05 |
| cg22308759 | 17 | 56064928 | GeneBody/1st intron       | VEZF1    | -5.006±0.246 | -5.377±0.444 | 2.68E-07 |
| cg19017193 | 17 | 56066027 | TSS1500                   | VEZF1    | -4.362±0.41  | -4.654±0.724 | 6.55E-03 |
| cg24269276 | 17 | 56084441 | GeneBody/1st exon         | SRSF1    | -4.885±0.239 | -5.223±0.441 | 1.07E-06 |
| cg12314510 | 17 | 56161063 | GeneBody/5'UTR/1st intron | DYNLL2   | -4.23±0.532  | -4.558±0.63  | 6.39E-03 |
| cg14996805 | 17 | 56430170 | TSS1500                   | SUPT4H1  | -5.415±0.715 | -5.864±0.651 | 3.46E-03 |
| cg24835159 | 17 | 56494554 | GeneBody/5'UTR/1st exon   | RNF43    | -0.424±0.275 | -0.252±0.344 | 6.38E-03 |
| cg07318658 | 17 | 56594994 | GeneBody/5'UTR/1st intron | MTMR4    | -3.766±0.232 | -3.967±0.421 | 1.16E-03 |
| cg14837411 | 17 | 56770008 | GeneBody/1st exon         | RAD51C   | -5.313±0.575 | -5.823±0.736 | 2.03E-04 |
| cg02318535 | 17 | 56832804 | TSS1500                   | PPM1E    | 0.982±0.283  | 1.32±0.407   | 3.94E-06 |
| cg19141563 | 17 | 56833253 | GeneBody/1st exon         | PPM1E    | -5.151±0.483 | -5.475±0.449 | 1.99E-03 |
| cg17989037 | 17 | 57232584 | GeneBody/5'UTR/1st exon   | SKA2     | -3.819±0.45  | -4.137±0.455 | 1.38E-03 |
| cg24616461 | 17 | 57233115 | GeneBody/5'UTR/1st exon   | PRR11    | -4.64±0.338  | -4.913±0.366 | 3.81E-04 |
| cg16904599 | 17 | 57287367 | TSS200                    | SMG8     | -4.621±0.371 | -4.986±0.444 | 4.07E-05 |
| cg06655504 | 17 | 57297718 | TSS200                    | GDPD1    | -4.25±0.51   | -4.811±0.618 | 7.84E-06 |
| cg23546413 | 17 | 57298079 | GeneBody/1st exon         | GDPD1    | -5.437±0.515 | -6.177±0.61  | 6.57E-08 |
| cg11000221 | 17 | 57643293 | GeneBody/1st intron       | DHX40    | -4.448±0.627 | -4.928±0.617 | 5.70E-04 |
| cg13113656 | 17 | 57697489 | GeneBody/5'UTR/1st exon   | CLTC     | -5.285±0.349 | -5.535±0.373 | 1.31E-03 |
| cg00547829 | 17 | 57970161 | GeneBody/5'UTR/1st exon   | TUBD1    | -4.493±0.525 | -4.832±0.624 | 4.36E-03 |
| cg15802192 | 17 | 57970418 | GeneBody/5'UTR/1st exon   | RPS6KB1  | -5.283±0.335 | -5.721±0.57  | 2.36E-06 |
| cg27541374 | 17 | 58042493 | TSS1500                   | RNFT1    | -4.056±0.532 | -4.458±0.63  | 1.01E-03 |
| cg13790571 | 17 | 58156411 | TSS200                    | HEATR6   | -4.452±0.249 | -4.788±0.482 | 3.67E-06 |
| cg17179099 | 17 | 58603287 | GeneBody/1st exon         | APBP2    | -5.756±0.438 | -6.145±0.493 | 1.30E-04 |
| cg14623313 | 17 | 58603785 | TSS1500                   | APBP2    | -3.447±0.424 | -3.094±0.493 | 3.32E-04 |
| cg06090421 | 17 | 58677051 | TSS1500                   | PPM1D    | -4.263±0.455 | -4.599±0.508 | 1.12E-03 |
| cg10673984 | 17 | 58677844 | GeneBody/1st exon         | PPM1D    | -5.517±0.575 | -6.099±0.63  | 2.00E-05 |
| cg20235051 | 17 | 59489852 | GeneBody/1st exon         | C17orf82 | -5.365±0.515 | -5.869±0.504 | 2.51E-05 |
| cg03866607 | 17 | 59532826 | TSS1500                   | TBX4     | -0.841±0.137 | -0.948±0.171 | 7.62E-04 |
| cg17894008 | 17 | 59668604 | TSS200                    | NACA2    | 2.982±0.241  | 3.193±0.313  | 2.58E-04 |
| cg05986149 | 17 | 59941055 | TSS200                    | BRIP1    | -3.023±0.416 | -2.564±0.575 | 1.20E-05 |
| cg21890738 | 17 | 61523271 | GeneBody/5'UTR/1st exon   | CYB561   | -4.515±0.317 | -4.697±0.352 | 9.65E-03 |
| cg06849227 | 17 | 61599694 | TSS1500                   | KCNH6    | 3.796±0.262  | 3.987±0.284  | 1.22E-03 |
| cg14750190 | 17 | 61678092 | TSS200                    | TACO1    | -4.875±0.493 | -5.265±0.492 | 4.10E-04 |
| cg00053292 | 17 | 61678300 | GeneBody/5'UTR/1st exon   | TACO1    | -4.539±0.588 | -5.009±0.55  | 3.19E-04 |
| cg14309281 | 17 | 61700072 | GeneBody/5'UTR/1st exon   | MAP3K3   | -6.24±0.734  | -6.768±0.676 | 9.78E-04 |
| cg22520471 | 17 | 61851767 | GeneBody/5'UTR/1st intron | DDX42    | -4.908±0.636 | -5.274±0.524 | 6.18E-03 |
| cg11296363 | 17 | 61905004 | GeneBody/5'UTR/1st exon   | FTSJ3    | -4.971±0.619 | -5.41±0.607  | 1.25E-03 |
| cg12577610 | 17 | 61920423 | TSS200                    | SMARCD2  | -5.177±0.653 | -5.674±0.578 | 5.10E-04 |
| cg09585781 | 17 | 61951136 | TSS200                    | CSH2     | 0.215±0.168  | 0.123±0.147  | 9.86E-03 |
| cg02856727 | 17 | 61959416 | TSS200                    | GH2      | 0.797±0.201  | 0.617±0.202  | 9.02E-05 |
| cg12911791 | 17 | 61988811 | TSS200                    | CSHL1    | 0.801±0.225  | 0.605±0.254  | 1.72E-04 |
| cg13694749 | 17 | 62050038 | GeneBody/1st exon         | SCN4A    | 1.899±0.209  | 2.031±0.305  | 9.05E-03 |
| cg11336428 | 17 | 62340505 | GeneBody/5'UTR/1st intron | TEX2     | -3.779±0.185 | -3.932±0.33  | 1.88E-03 |
| cg25629694 | 17 | 62657497 | GeneBody/1st intron       | SMURF2   | -1.834±0.472 | -1.475±0.502 | 7.29E-04 |
| cg04808672 | 17 | 62658750 | TSS1500                   | SMURF2   | -4.674±0.297 | -4.884±0.57  | 9.37E-03 |
| cg24085207 | 17 | 62972338 | TSS1500                   | AMZ2P1   | -4.593±0.518 | -4.952±0.551 | 1.86E-03 |
| cg24747122 | 17 | 63053929 | TSS1500                   | GNA13    | -0.716±0.362 | -0.479±0.404 | 3.49E-03 |
| cg08831701 | 17 | 65241304 | GeneBody/5'UTR/1st exon   | HELZ     | -4.362±0.287 | -4.641±0.425 | 1.07E-04 |
| cg26387998 | 17 | 65241484 | TSS200                    | HELZ     | -4.267±0.287 | -4.572±0.455 | 4.62E-05 |
| cg04998282 | 17 | 65713980 | TSS200                    | NOL11    | -4.577±0.238 | -4.779±0.312 | 3.84E-04 |
| cg12398397 | 17 | 65820969 | TSS1500                   | BPTF     | -3.982±0.65  | -4.468±0.543 | 5.64E-04 |
| cg16435601 | 17 | 65822392 | GeneBody/1st exon         | BPTF     | -5.227±0.546 | -5.901±0.696 | 1.41E-06 |
| cg08172935 | 17 | 66244127 | TSS200                    | AMZ2     | -5.001±0.456 | -5.346±0.436 | 6.12E-04 |
| cg14572485 | 17 | 66244196 | GeneBody/5'UTR/1st exon   | AMZ2     | -5.451±0.533 | -5.958±0.6   | 5.32E-05 |

|             |    |          |                           |              |              |              |          |
|-------------|----|----------|---------------------------|--------------|--------------|--------------|----------|
| cg11879514  | 17 | 66287032 | GeneBody/5'UTR/1st intron | SLC16A6      | -3.263±0.683 | -3.686±0.528 | 3.16E-03 |
| cg13616221  | 17 | 66453394 | GeneBody/1st intron       | WIFI1        | -5.192±0.331 | -5.447±0.32  | 5.12E-04 |
| cg00214346  | 17 | 66508517 | TSS200                    | PRKAR1A      | -5.244±0.422 | -5.639±0.498 | 7.59E-05 |
| cg11651717  | 17 | 67323282 | GeneBody/5'UTR/1st exon   | ABCA5        | -5.602±0.627 | -6.149±0.589 | 1.12E-04 |
| cg18943599  | 17 | 71160892 | TSS1500                   | SSTR2        | -5.366±0.407 | -5.633±0.456 | 3.52E-03 |
| cg22195268  | 17 | 71227699 | GeneBody/1st intron       | FAM104A      | -3.668±0.252 | -3.842±0.276 | 2.00E-03 |
| cg12569173  | 17 | 71227752 | GeneBody/1st intron       | FAM104A      | -3.693±0.383 | -3.981±0.383 | 7.11E-04 |
| cg11394644  | 17 | 71229370 | GeneBody/5'UTR            | C17orf80     | -3.748±0.534 | -4.071±0.573 | 6.02E-03 |
| cg23333306  | 17 | 71307514 | GeneBody/5'UTR/1st intron | CDC42EP4     | -5.092±0.42  | -5.611±0.631 | 2.95E-06 |
| cg19598544  | 17 | 72209156 | GeneBody/1st exon         | MGC16275     | -4.444±0.363 | -4.82±0.461  | 2.34E-05 |
| cg07882831  | 17 | 72209802 | GeneBody/1st exon         | TTYH2        | -5.784±0.597 | -6.201±0.549 | 1.32E-03 |
| cg24274272  | 17 | 72278023 | GeneBody                  | DNAI2        | 5.213±0.363  | 5.453±0.363  | 2.56E-03 |
| cg22377428  | 17 | 72363882 | GeneBody/1st exon         | GPR142       | 2.422±0.219  | 2.598±0.189  | 2.69E-04 |
| cg21922841  | 17 | 72744131 | TSS1500                   | SLC9A3R1     | -3.167±0.338 | -3.372±0.385 | 6.74E-03 |
| cg06624832  | 17 | 72772340 | GeneBody/5'UTR/1st intron | NAT9         | -4.943±0.348 | -5.45±0.512  | 1.26E-07 |
| cg00032227  | 17 | 72772512 | TSS200                    | NAT9         | -5.032±0.426 | -5.472±0.648 | 5.24E-05 |
| cg23727583  | 17 | 72869061 | GeneBody/1st exon         | FDXR         | -4.831±0.438 | -5.09±0.531  | 9.35E-03 |
| cg14030083  | 17 | 72983622 | TSS200                    | CDR2L        | -3.879±0.412 | -4.123±0.422 | 6.77E-03 |
| cg13670595  | 17 | 72983817 | GeneBody/5'UTR/1st exon   | CDR2L        | -5.624±0.493 | -5.946±0.559 | 3.73E-03 |
| cg11263584  | 17 | 73008587 | TSS200                    | ICT1         | -5.047±0.366 | -5.289±0.386 | 2.88E-03 |
| cg26612644  | 17 | 73041885 | GeneBody/5'UTR/1st intron | ATP5H        | -0.374±0.288 | -0.644±0.58  | 9.84E-04 |
| cg10520594  | 17 | 73127197 | GeneBody                  | NT5C         | -3.439±0.458 | -3.741±0.497 | 2.99E-03 |
| cg17065601  | 17 | 73179370 | TSS1500                   | SUMO2        | -4.86±0.34   | -5.323±0.513 | 5.68E-07 |
| cg22226765  | 17 | 73257283 | GeneBody/1st intron       | GGA3         | -4.231±0.373 | -4.448±0.294 | 5.48E-03 |
| cg19586645  | 17 | 73266642 | TSS1500                   | MIF4GD       | -5.059±0.344 | -5.396±0.504 | 9.59E-05 |
| cg20590849  | 17 | 73267439 | GeneBody/1st exon         | LOC100287042 | -5.666±0.589 | -6.387±0.766 | 1.77E-06 |
| cg00901704  | 17 | 73285325 | GeneBody/5'UTR/1st intron | SLC25A19     | -4.095±0.413 | -4.378±0.365 | 1.53E-03 |
| cg09509576  | 17 | 73402025 | TSS200                    | MIR3678      | -3.768±0.291 | -4.043±0.377 | 9.25E-05 |
| cg20492401  | 17 | 73452580 | TSS200                    | KIAA0195     | -4.609±0.499 | -4.902±0.516 | 7.26E-03 |
| cg16315923  | 17 | 73453100 | GeneBody/5'UTR/1st intron | KIAA0195     | -4.48±0.289  | -4.662±0.305 | 4.30E-03 |
| cg01803810  | 17 | 73512319 | TSS1500                   | TSEN54       | -5.671±0.578 | -6.083±0.461 | 8.90E-04 |
| cg21391660  | 17 | 73522123 | GeneBody/5'UTR/1st intron | LLGL2        | -4.748±0.33  | -5.034±0.379 | 1.91E-04 |
| cg15820189  | 17 | 73663551 | GeneBody/1st exon         | SAP30BP      | -4.917±0.561 | -5.431±0.608 | 8.02E-05 |
| cg112146151 | 17 | 73716945 | TSS1500                   | ITGB4        | -1.146±0.264 | -0.93±0.234  | 2.59E-04 |
| cg26527984  | 17 | 73761562 | TSS1500                   | GALK1        | -0.118±0.152 | 0.031±0.194  | 5.50E-05 |
| cg06502868  | 17 | 73775964 | TSS200                    | H3F3B        | -5.675±0.522 | -5.971±0.45  | 7.30E-03 |
| cg22467534  | 17 | 73841658 | TSS1500                   | UNC13D       | -2.811±0.313 | -3.017±0.483 | 7.55E-03 |
| cg24291845  | 17 | 73851885 | TSS1500                   | WBP2         | -4.904±0.483 | -5.318±0.61  | 3.00E-04 |
| cg11653266  | 17 | 73901339 | TSS200                    | MRPL38       | -5.139±0.411 | -5.472±0.383 | 2.73E-04 |
| cg12452675  | 17 | 73975215 | TSS200                    | TEN1         | -5.477±0.518 | -5.894±0.533 | 3.60E-04 |
| cg07471052  | 17 | 73996245 | TSS1500                   | CDK3         | 2.423±0.448  | 2.74±0.52    | 1.85E-03 |
| cg16017492  | 17 | 74022575 | GeneBody/1st intron       | EVPL         | 1.887±0.177  | 2.053±0.326  | 5.67E-04 |
| cg21016177  | 17 | 74100207 | TSS1500                   | EXOC7        | -3.824±0.242 | -4.153±0.44  | 1.94E-06 |
| cg01294702  | 17 | 74136978 | GeneBody/1st intron       | RNF157-AS1   | -2.66±0.245  | -2.814±0.259 | 4.47E-03 |
| cg07126839  | 17 | 74261637 | GeneBody/1st exon         | UBALD2       | -5.147±0.387 | -5.483±0.556 | 4.09E-04 |
| cg12612336  | 17 | 74350433 | TSS1500                   | PRPSAP1      | -5.106±0.41  | -5.567±0.554 | 8.32E-06 |
| cg17399352  | 17 | 74379779 | TSS1500                   | SPHK1        | -5.232±0.668 | -5.8±0.583   | 1.35E-04 |
| cg07775675  | 17 | 74379922 | TSS1500                   | SPHK1        | -4.021±0.453 | -4.546±0.534 | 3.03E-06 |
| cg21522303  | 17 | 74581331 | GeneBody/1st intron       | ST6GALNAC2   | -4.958±0.478 | -5.258±0.499 | 4.37E-03 |
| cg19935424  | 17 | 74706305 | GeneBody/1st intron       | MXRA7        | -3.871±0.347 | -4.089±0.413 | 5.66E-03 |
| cg07851243  | 17 | 74707271 | TSS1500                   | MXRA7        | -4.587±0.283 | -4.798±0.414 | 2.20E-03 |
| cg08524221  | 17 | 74732291 | TSS1500                   | MFSD11       | -3.442±0.306 | -3.699±0.373 | 3.53E-04 |
| cg08308286  | 17 | 74732409 | TSS1500                   | MFSD11       | -5.157±0.479 | -5.46±0.689  | 8.52E-03 |
| cg19125323  | 17 | 74733470 | GeneBody/5'UTR/1st exon   | SRSF2        | -5.814±0.607 | -6.304±0.567 | 2.87E-04 |
| cg07112210  | 17 | 74864065 | TSS1500                   | MGAT5B       | -1.324±0.279 | -1.135±0.258 | 1.80E-03 |
| cg04060163  | 17 | 75136271 | TSS1500                   | SEC14L1      | -3.44±0.203  | -3.635±0.348 | 2.86E-04 |
| cg25344639  | 17 | 75137144 | GeneBody/5'UTR/1st exon   | SEC14L1      | -4.361±0.608 | -4.987±0.607 | 1.20E-05 |
| cg18907029  | 17 | 76165523 | GeneBody/1st intron       | SYNGR2       | -4.956±0.31  | -5.236±0.5   | 4.17E-04 |
| cg20104688  | 17 | 76183078 | GeneBody/5'UTR/1st exon   | TK1          | -4.138±0.277 | -4.308±0.204 | 3.30E-03 |
| cg26267341  | 17 | 76210490 | GeneBody/1st exon         | BIRC5        | -4.976±0.395 | -5.212±0.339 | 4.85E-03 |
| cg06799664  | 17 | 76567121 | GeneBody                  | DNAH17       | 1.387±0.25   | 1.582±0.312  | 8.60E-04 |
| cg08024766  | 17 | 76777877 | GeneBody/1st intron       | CYTH1        | -3.623±0.426 | -3.274±0.523 | 4.72E-04 |
| cg03493069  | 17 | 76778892 | TSS1500                   | CYTH1        | -4.189±0.333 | -4.649±0.464 | 2.46E-07 |
| cg06508934  | 17 | 76921095 | GeneBody/1st exon         | TIMP2        | -4.802±0.399 | -5.147±0.578 | 4.55E-04 |
| cg01107741  | 17 | 77006080 | TSS200                    | CANT1        | -4.086±0.324 | -4.525±0.592 | 2.15E-06 |
| cg17533847  | 17 | 77812622 | GeneBody                  | CBX4         | -5.453±0.483 | -5.796±0.423 | 1.02E-03 |
| cg20269976  | 17 | 78074920 | TSS1500                   | GAA          | -4.171±0.523 | -4.656±0.484 | 4.81E-05 |
| cg21516384  | 17 | 78233839 | TSS1500                   | RNF213       | -4.251±0.431 | -4.59±0.512  | 6.67E-04 |
| cg12073949  | 17 | 78519082 | GeneBody/5'UTR/1st exon   | RPTOR        | -4.662±0.35  | -5.035±0.534 | 3.45E-05 |
| cg19132701  | 17 | 78965457 | TSS200                    | CHMP6        | -5.819±0.55  | -6.212±0.494 | 1.04E-03 |
| cg23239052  | 17 | 79008930 | TSS200                    | BAIAP2       | -5.208±0.519 | -5.701±0.48  | 3.45E-05 |
| cg14623518  | 17 | 79009114 | GeneBody/1st intron       | BAIAP2       | -4.894±0.574 | -5.365±0.48  | 1.95E-04 |
| cg26717786  | 17 | 79139685 | GeneBody/1st intron       | AATK         | -3.632±0.267 | -3.899±0.534 | 4.22E-04 |
| cg07423906  | 17 | 79212344 | GeneBody/1st intron       | ENTHD2       | -4.16±0.341  | -4.452±0.466 | 3.89E-04 |
| cg21591452  | 17 | 79304628 | TSS200                    | TMEM105      | 2.273±0.276  | 2.584±0.383  | 9.14E-06 |
| cg19517525  | 17 | 79480921 | TSS1500                   | ACTG1        | -5.063±0.589 | -5.491±0.398 | 6.12E-04 |
| cg12693135  | 17 | 79651124 | GeneBody/1st exon         | HGS          | -4.571±0.36  | -4.888±0.564 | 5.09E-04 |
| cg23033866  | 17 | 79670804 | GeneBody/1st intron       | MRPL12       | -4.246±0.242 | -4.516±0.382 | 2.70E-05 |
| cg09085639  | 17 | 79670810 | GeneBody/1st intron       | MRPL12       | -4.026±0.258 | -4.341±0.384 | 3.41E-06 |
| cg17161537  | 17 | 79670933 | GeneBody/1st intron       | MRPL12       | -5.056±0.348 | -5.346±0.307 | 1.78E-04 |
| cg10299667  | 17 | 79679470 | GeneBody/1st exon         | SLC25A10     | -5.38±0.519  | -5.877±0.537 | 3.96E-05 |
| cg02387854  | 17 | 79849442 | GeneBody/1st exon         | ALYREF       | -6.401±0.623 | -6.758±0.524 | 6.61E-03 |
| cg01515426  | 17 | 79850075 | GeneBody/5'UTR/1st intron | ANAPC11      | -5.195±0.494 | -5.518±0.512 | 3.02E-03 |
| cg21039822  | 17 | 79869136 | TSS200                    | PCYT2        | -5.503±0.581 | -6.056±0.582 | 4.00E-05 |
| cg21770145  | 17 | 79869997 | TSS1500                   | PCYT2        | 2.662±0.258  | 2.811±0.293  | 9.28E-03 |
| cg17552093  | 17 | 79875985 | GeneBody/1st exon         | SIRT7        | -5.047±0.478 | -5.357±0.478 | 3.09E-03 |
| cg15118204  | 17 | 79876231 | TSS200                    | SIRT7        | -1.851±0.159 | -2.034±0.218 | 6.32E-06 |
| cg21396405  | 17 | 79885587 | GeneBody/5'UTR/1st exon   | MAFG         | -5.521±0.461 | -5.91±0.694  | 6.87E-04 |
| cg02451362  | 17 | 79885650 | TSS200                    | MAFG-AS1     | -5.587±0.794 | -6.115±0.602 | 1.63E-03 |
| cg25759517  | 17 | 79895006 | TSS200                    | PYCR1        | -4.784±0.439 | -5.106±0.436 | 9.21E-04 |
| cg24392479  | 17 | 79934870 | TSS1500                   | ASPSR1       | -4.481±0.502 | -4.761±0.415 | 7.88E-03 |
| cg10645943  | 17 | 79980825 | TSS200                    | STRA13       | -4.979±0.479 | -5.48±0.573  | 1.63E-05 |
| cg01350700  | 17 | 79995808 | TSS1500                   | DCXR         | -4.463±0.474 | -4.999±0.665 | 8.76E-06 |
| cg16878652  | 17 | 80009856 | GeneBody/1st intron       | GPS1         | -5.446±0.686 | -5.956±0.625 | 6.93E-04 |
| cg23244421  | 17 | 80056046 | GeneBody/5'UTR/1st exon   | FASN         | -4.49±0.327  | -4.731±0.416 | 1.57E-03 |

|             |    |          |                           |            |              |              |          |
|-------------|----|----------|---------------------------|------------|--------------|--------------|----------|
| cg21565972  | 17 | 80109576 | GeneBody                  | CCDC57     | 2.881±0.163  | 2.993±0.284  | 8.22E-03 |
| cg08576197  | 17 | 80170622 | GeneBody/5'UTR/1st intron | CCDC57     | -4.805±0.452 | -5.115±0.395 | 1.49E-03 |
| cg24200059  | 17 | 80375975 | TSS1500                   | HEXDC      | -2.839±0.269 | -3.031±0.342 | 2.12E-03 |
| cg08799191  | 17 | 80376884 | TSS1500                   | OGFOD3     | -3.465±0.458 | -4.006±0.553 | 2.38E-06 |
| cg02175035  | 17 | 80656466 | GeneBody/1st exon         | RAB40B     | -5.192±0.619 | -5.556±0.445 | 4.51E-03 |
| cg05348272  | 17 | 80710049 | GeneBody/5'UTR/1st exon   | TBCD       | -5.326±0.597 | -5.93±0.623  | 1.75E-05 |
| cg26516954  | 17 | 81009758 | TSS200                    | B3GNTL1    | -5.573±0.408 | -5.935±0.568 | 2.75E-04 |
| cg02273078  | 18 | 158567   | GeneBody/5'UTR/1st exon   | USP14      | -6.047±0.709 | -6.574±0.79  | 1.05E-03 |
| cg24907852  | 18 | 712250   | GeneBody/1st intron       | ENOSF1     | -3.53±0.487  | -3.958±0.54  | 1.42E-04 |
| cg14671488  | 18 | 811809   | GeneBody/5'UTR/1st intron | YES1       | -2.731±0.49  | -3.295±0.693 | 7.11E-06 |
| cg06284244  | 18 | 813059   | TSS1500                   | YES1       | -4.355±0.32  | -4.64±0.316  | 9.19E-05 |
| cg07376535  | 18 | 905450   | GeneBody/1st exon         | ADCYAP1    | -3.092±0.302 | -3.302±0.454 | 4.47E-03 |
| cg16932672  | 18 | 2571333  | GeneBody/5'UTR/1st exon   | METTL4     | -4.746±0.707 | -5.317±0.667 | 2.89E-04 |
| cg26393983  | 18 | 2571747  | GeneBody/5'UTR/1st intron | NDC80      | -4.526±0.235 | -4.739±0.245 | 8.25E-05 |
| cg141133708 | 18 | 2846834  | TSS200                    | EMILIN2    | -3.418±0.373 | -3.64±0.346  | 5.56E-03 |
| cg18110535  | 18 | 3012413  | TSS1500                   | LPIN2      | -4.161±0.271 | -4.359±0.283 | 1.06E-03 |
| cg21351102  | 18 | 3247294  | TSS1500                   | MYL12A     | -4.465±0.353 | -4.701±0.386 | 2.77E-03 |
| cg21872393  | 18 | 3247654  | GeneBody/5'UTR/1st exon   | MYL12A     | -4.8±0.366   | -5.031±0.328 | 3.31E-03 |
| cg13224710  | 18 | 3411743  | TSS200                    | TGIF1      | 2.061±0.171  | 2.16±0.165   | 7.16E-03 |
| cg15156844  | 18 | 3880020  | GeneBody/1st intron       | DLGAP1-AS3 | 5.161±0.393  | 5.398±0.308  | 4.13E-03 |
| cg07075930  | 18 | 7567717  | GeneBody/5'UTR/1st exon   | PTPRM      | -4.014±0.481 | -4.304±0.578 | 7.92E-03 |
| cg17905198  | 18 | 9103090  | GeneBody/1st intron       | NDUFV2     | -5.192±0.4   | -5.545±0.415 | 1.18E-04 |
| cg06461769  | 18 | 9335102  | GeneBody/5'UTR/1st intron | TWSG1      | -5.413±0.465 | -5.983±0.758 | 5.56E-06 |
| cg19058629  | 18 | 9475884  | GeneBody/5'UTR/1st intron | RALBP1     | -1.836±0.53  | -2.182±0.54  | 3.00E-03 |
| cg14797438  | 18 | 9615155  | TSS1500                   | PPP4R1     | -3.933±0.296 | -4.138±0.272 | 1.45E-03 |
| cg06243393  | 18 | 9885015  | TSS1500                   | TXNDC2     | 2.709±0.279  | 2.515±0.423  | 4.71E-03 |
| cg26328002  | 18 | 10455463 | GeneBody/1st intron       | APCDD1     | -3.889±0.404 | -4.276±0.464 | 5.02E-05 |
| cg02159896  | 18 | 11908181 | GeneBody/1st intron       | MPPE1      | -4.811±0.513 | -5.238±0.63  | 3.84E-04 |
| cg22467216  | 18 | 12308812 | GeneBody                  | TUBB6      | -5.478±0.521 | -5.929±0.525 | 1.39E-04 |
| cg24300924  | 18 | 12407808 | TSS200                    | SLMO1      | -4.976±0.46  | -5.306±0.458 | 1.17E-03 |
| cg12796229  | 18 | 12408045 | GeneBody/1st intron       | SLMO1      | -3.813±0.367 | -4.044±0.448 | 5.83E-03 |
| cg04510262  | 18 | 12884175 | GeneBody/5'UTR/1st exon   | PTPN2      | -5.115±0.52  | -5.572±0.631 | 1.90E-04 |
| cg14013604  | 18 | 12884564 | TSS1500                   | PTPN2      | -4.52±0.476  | -4.83±0.471  | 2.86E-03 |
| cg04633384  | 18 | 13218816 | GeneBody/5'UTR/1st exon   | LDLRAD4    | -3.885±0.309 | -4.155±0.518 | 7.50E-04 |
| cg09685104  | 18 | 13726506 | GeneBody/5'UTR/1st exon   | FAM210A    | -6.333±0.523 | -6.878±0.561 | 1.19E-05 |
| cg00178790  | 18 | 13726864 | GeneBody/5'UTR/1st intron | RNMT       | -4.334±0.27  | -4.513±0.29  | 2.99E-03 |
| cg22792432  | 18 | 18691067 | GeneBody/5'UTR/1st exon   | ROCK1      | -6.237±0.646 | -7.158±0.666 | 5.48E-08 |
| cg26212229  | 18 | 19191611 | TSS1500                   | SNRPD1     | 2.572±0.228  | 2.728±0.223  | 1.79E-03 |
| cg17797182  | 18 | 19192384 | GeneBody/5'UTR/1st exon   | SNRPD1     | -5.214±0.452 | -5.486±0.448 | 5.68E-03 |
| cg12985418  | 18 | 19320538 | TSS1500                   | MIB1       | -4.892±0.322 | -5.109±0.323 | 2.20E-03 |
| cg25291907  | 18 | 19321706 | GeneBody/1st exon         | MIB1       | -5.746±0.527 | -6.329±0.651 | 7.50E-06 |
| cg02847216  | 18 | 19997803 | GeneBody/5'UTR/1st exon   | CTAGE1     | 2.504±0.241  | 2.774±0.325  | 9.16E-06 |
| cg21518938  | 18 | 20513051 | TSS1500                   | RBBP8      | -5.125±0.434 | -5.389±0.423 | 5.04E-03 |
| cg02366059  | 18 | 21017616 | GeneBody/1st intron       | TMEM241    | -2.668±0.4   | -2.189±0.478 | 1.83E-06 |
| cg07851278  | 18 | 21033426 | GeneBody/1st exon         | RIOK3      | -4.906±0.423 | -5.178±0.402 | 2.97E-03 |
| cg18175410  | 18 | 21083641 | GeneBody/1st exon         | C18orf8    | -5.775±0.442 | -6.118±0.51  | 7.31E-04 |
| cg11956146  | 18 | 21718974 | GeneBody/5'UTR/1st exon   | CABYR      | -4.375±0.673 | -4.896±0.769 | 7.22E-04 |
| cg15211655  | 18 | 21977340 | GeneBody/5'UTR/1st intron | OSBPL1A    | -4.826±0.346 | -5.184±0.465 | 3.00E-05 |
| cg25619607  | 18 | 22006735 | GeneBody/1st exon         | IMPACT     | -5.107±0.333 | -5.335±0.437 | 3.39E-03 |
| cg16511708  | 18 | 23671264 | TSS1500                   | SS18       | -4.964±0.397 | -5.323±0.461 | 1.14E-04 |
| cg08555924  | 18 | 29026301 | TSS1500                   | DSG3       | 2.548±0.275  | 2.738±0.265  | 1.60E-03 |
| cg15259973  | 18 | 29078565 | GeneBody/1st intron       | DSG2       | -3.133±0.527 | -3.48±0.539  | 2.80E-03 |
| cg24711626  | 18 | 29522957 | GeneBody/5'UTR/1st exon   | TRAPPC8    | -6.102±0.604 | -6.588±0.603 | 3.32E-04 |
| cg14118546  | 18 | 29523417 | TSS1500                   | TRAPPC8    | -4.848±0.472 | -5.154±0.531 | 3.86E-03 |
| cg11314292  | 18 | 29598433 | TSS200                    | RNF125     | -3.814±0.339 | -4.049±0.399 | 2.33E-03 |
| cg13760546  | 18 | 29598697 | GeneBody/5'UTR/1st exon   | RNF125     | -5.543±0.529 | -5.916±0.523 | 1.29E-03 |
| cg01941619  | 18 | 29770081 | GeneBody/1st exon         | MEP1B      | 1.079±0.239  | 0.886±0.301  | 5.85E-04 |
| cg07020962  | 18 | 32621292 | TSS200                    | MAPRE2     | -4.735±0.381 | -4.994±0.509 | 3.78E-03 |
| cg16317961  | 18 | 32621748 | GeneBody/1st intron       | MAPRE2     | -6.444±0.501 | -4.92±0.396  | 8.19E-03 |
| cg25227148  | 18 | 32870611 | GeneBody/1st intron       | ZNF271     | -4.615±0.359 | -4.91±0.554  | 1.04E-03 |
| cg03161112  | 18 | 32924652 | TSS1500                   | ZNF24      | -4.296±0.466 | -4.673±0.568 | 5.31E-04 |
| cg03776551  | 18 | 32956850 | GeneBody/5'UTR/1st intron | ZNF396     | -5.285±0.51  | -5.714±0.433 | 1.47E-04 |
| cg27318281  | 18 | 33078719 | TSS1500                   | INO80C     | 2.41±0.134   | 2.505±0.168  | 2.30E-03 |
| cg09003876  | 18 | 33552519 | TSS200                    | C18orf21   | -5.602±0.368 | -5.956±0.516 | 1.02E-04 |
| cg08803129  | 18 | 33708920 | GeneBody/5'UTR/1st intron | SLC39A6    | -5.715±0.473 | -6.113±0.42  | 1.53E-04 |
| cg20839219  | 18 | 33710235 | GeneBody/1st intron       | ELP2       | -4.323±0.472 | -4.645±0.433 | 1.66E-03 |
| cg08015253  | 18 | 33767315 | TSS200                    | MOCOS      | -4.475±0.239 | -4.661±0.25  | 5.26E-04 |
| cg08568512  | 18 | 33877839 | GeneBody/1st exon         | FHOD3      | -5.017±0.396 | -5.305±0.596 | 3.11E-03 |
| cg12219753  | 18 | 34408901 | TSS200                    | KIAA1328   | -5.826±0.418 | -6.13±0.377  | 8.70E-04 |
| cg12053284  | 18 | 40857256 | GeneBody/5'UTR/1st exon   | SYT4       | -4.399±0.361 | -4.683±0.426 | 6.65E-04 |
| cg16222762  | 18 | 40857464 | GeneBody/5'UTR/1st exon   | SYT4       | -4.334±0.256 | -4.69±0.473  | 1.58E-06 |
| cg00037763  | 18 | 42281763 | GeneBody                  | SETBP1     | 3.009±0.184  | 3.171±0.291  | 5.38E-04 |
| cg10732834  | 18 | 43498793 | GeneBody                  | EPG5       | 1.655±0.289  | 1.863±0.258  | 8.92E-04 |
| cg18307767  | 18 | 43684181 | GeneBody/5'UTR/1st exon   | ATP5A1     | -4.853±0.343 | -5.113±0.318 | 5.85E-04 |
| cg07008350  | 18 | 44557595 | TSS1500                   | TCEB3C     | 2.571±0.243  | 2.826±0.425  | 9.77E-05 |
| cg02432101  | 18 | 44557635 | TSS1500                   | TCEB3C     | 2.68±0.378   | 2.326±0.485  | 1.00E-04 |
| cg02987051  | 18 | 44702545 | GeneBody/1st intron       | IER3IP1    | -5.338±0.618 | -5.735±0.523 | 2.52E-03 |
| cg03029145  | 18 | 45456587 | GeneBody/5'UTR/1st intron | SMAD2      | -4.469±0.332 | -4.802±0.546 | 1.22E-04 |
| cg11611854  | 18 | 47018756 | GeneBody/5'UTR/1st exon   | RPL17      | -4.597±0.466 | -4.932±0.5   | 1.34E-03 |
| cg19857457  | 18 | 47018947 | TSS200                    | RPL17      | -4.671±0.682 | -5.121±0.728 | 2.92E-03 |
| cg00231140  | 18 | 47339702 | GeneBody/1st intron       | ACAA2      | -4.428±0.373 | -4.864±0.448 | 2.79E-06 |
| cg26137790  | 18 | 47340501 | GeneBody/1st exon         | SCARNA17   | -5.389±0.424 | -5.922±0.467 | 6.50E-07 |
| cg24041453  | 18 | 47792708 | GeneBody/1st exon         | CCDC11     | -2.754±0.457 | -3.082±0.627 | 2.57E-03 |
| cg03841029  | 18 | 47807709 | GeneBody/5'UTR/1st intron | MBD1       | -3.987±0.429 | -4.261±0.47  | 4.10E-03 |
| cg13423076  | 18 | 47814178 | GeneBody/5'UTR/1st exon   | CXXC1      | -5.093±0.49  | -5.657±0.576 | 3.37E-06 |
| cg20016845  | 18 | 47814312 | GeneBody/5'UTR/1st exon   | CXXC1      | -4.896±0.455 | -5.431±0.565 | 2.92E-06 |
| cg06883149  | 18 | 47901188 | TSS1500                   | SKA1       | -4.6±0.364   | -4.896±0.403 | 3.86E-04 |
| cg01313966  | 18 | 47901443 | GeneBody/5'UTR/1st exon   | SKA1       | -4.83±0.417  | -5.099±0.464 | 3.78E-03 |
| cg19355919  | 18 | 48346593 | TSS200                    | MRO        | -4.39±0.257  | -4.698±0.42  | 8.05E-06 |
| cg06777274  | 18 | 48406251 | GeneBody/5'UTR/1st intron | ME2        | -4.408±0.272 | -4.681±0.313 | 2.73E-05 |
| cg11911418  | 18 | 48493759 | TSS1500                   | ELAC1      | 3.408±0.274  | 3.576±0.36   | 8.19E-03 |
| cg26909431  | 18 | 48556216 | TSS1500                   | SMAD4      | -4.056±0.392 | -3.721±0.437 | 2.08E-04 |
| cg10315128  | 18 | 48556631 | GeneBody/5'UTR/1st exon   | SMAD4      | -4.756±0.296 | -5.054±0.479 | 1.09E-04 |
| cg18572014  | 18 | 51038068 | GeneBody                  | DCC        | 1.61±0.181   | 1.761±0.216  | 3.36E-04 |
| cg21284731  | 18 | 51038187 | GeneBody                  | DCC        | 1.006±0.111  | 1.136±0.287  | 4.25E-04 |

|            |    |          |                           |                  |              |              |          |
|------------|----|----------|---------------------------|------------------|--------------|--------------|----------|
| cg22836370 | 18 | 51751085 | GeneBody/5'UTR/1st exon   | <i>MBD2</i>      | -4.514±0.357 | -4.74±0.527  | 8.92E-03 |
| cg02447314 | 18 | 51796331 | GeneBody/1st intron       | <i>POLI</i>      | -4.873±0.446 | -5.35±0.545  | 1.19E-05 |
| cg18934187 | 18 | 51882189 | TSS1500                   | <i>STARD6</i>    | 2.029±0.331  | 1.593±0.537  | 1.59E-06 |
| cg08390021 | 18 | 51884793 | TSS1500                   | <i>C18orf54</i>  | -5.644±0.431 | -6.102±0.414 | 7.02E-06 |
| cg00381076 | 18 | 51884797 | TSS1500                   | <i>C18orf54</i>  | -4.177±0.296 | -4.475±0.475 | 1.02E-04 |
| cg09052983 | 18 | 52495605 | TSS200                    | <i>RAB27B</i>    | -4.109±0.278 | -4.317±0.341 | 1.26E-03 |
| cg07714374 | 18 | 53255577 | GeneBody/5'UTR/1st exon   | <i>TCF4</i>      | -2.24±0.418  | -2.477±0.415 | 8.77E-03 |
| cg08491964 | 18 | 53255771 | GeneBody/5'UTR/1st exon   | <i>TCF4</i>      | -2.629±0.166 | -2.767±0.26  | 9.50E-04 |
| cg06765434 | 18 | 54305287 | GeneBody/1st intron       | <i>TXNL1</i>     | -4.463±0.272 | -4.679±0.456 | 3.29E-04 |
| cg09130402 | 18 | 54306120 | TSS200                    | <i>TXNL1</i>     | -5.124±0.474 | -5.418±0.49  | 4.76E-03 |
| cg04099673 | 18 | 54318390 | TSS1500                   | <i>WDR7</i>      | -4.807±0.414 | -5.252±0.557 | 1.60E-05 |
| cg05243804 | 18 | 55254238 | TSS1500                   | <i>FECH</i>      | -4.174±0.348 | -4.428±0.461 | 1.99E-03 |
| cg09419116 | 18 | 56806624 | TSS1500                   | <i>SEC11C</i>    | -5.006±0.427 | -5.251±0.367 | 6.49E-03 |
| cg17832162 | 18 | 56807548 | GeneBody/1st intron       | <i>SEC11C</i>    | -4.702±0.355 | -4.925±0.295 | 3.01E-03 |
| cg01625242 | 18 | 56886915 | TSS1500                   | <i>GRP</i>       | -1.182±0.183 | -1.325±0.266 | 1.30E-03 |
| cg23357981 | 18 | 56887785 | GeneBody/1st intron       | <i>GRP</i>       | -3.021±0.32  | -3.246±0.45  | 3.43E-03 |
| cg17709676 | 18 | 57026192 | GeneBody/1st intron       | <i>LMAN1</i>     | -5.21±0.408  | -5.544±0.407 | 2.70E-04 |
| cg26330371 | 18 | 57026799 | TSS1500                   | <i>LMAN1</i>     | -3.115±0.199 | -3.361±0.325 | 4.48E-06 |
| cg13415207 | 18 | 57567721 | GeneBody/5'UTR/1st exon   | <i>PMAIP1</i>    | -5.604±0.466 | -5.925±0.438 | 1.55E-03 |
| cg19423014 | 18 | 59560091 | GeneBody/5'UTR/1st exon   | <i>RNF152</i>    | -4.238±0.4   | -4.581±0.426 | 1.80E-04 |
| cg08223235 | 18 | 60903834 | GeneBody                  | <i>BCL2</i>      | 1.673±0.271  | 1.868±0.32   | 1.60E-03 |
| cg09752703 | 18 | 60986622 | TSS200                    | <i>BCL2</i>      | -4.634±0.413 | -5.019±0.383 | 4.52E-05 |
| cg03813215 | 18 | 60986679 | TSS200                    | <i>BCL2</i>      | -4.015±0.222 | -4.141±0.235 | 9.45E-03 |
| cg08554462 | 18 | 60986911 | TSS1500                   | <i>BCL2</i>      | -3.578±0.393 | -3.848±0.415 | 1.96E-03 |
| cg14455307 | 18 | 60987429 | TSS1500                   | <i>BCL2</i>      | -5.437±0.448 | -5.806±0.589 | 5.46E-04 |
| cg11255230 | 18 | 60987808 | TSS1500                   | <i>BCL2</i>      | -4.794±0.54  | -5.181±0.556 | 1.27E-03 |
| cg23613305 | 18 | 61034556 | TSS200                    | <i>KDSR</i>      | -5.569±0.562 | -6.145±0.614 | 1.64E-05 |
| cg05934874 | 18 | 61089154 | GeneBody/1st intron       | <i>VPS4B</i>     | -4.227±0.382 | -4.6±0.46    | 4.64E-05 |
| cg13613748 | 18 | 61090281 | TSS1500                   | <i>VPS4B</i>     | -3.845±0.277 | -4.093±0.396 | 2.82E-04 |
| cg10533434 | 18 | 61329226 | TSS200                    | <i>SERPINB3</i>  | 0.908±0.455  | 0.458±0.567  | 4.29E-05 |
| cg24691255 | 18 | 61553966 | TSS1500                   | <i>SERPINB2</i>  | 2.66±0.29    | 2.836±0.292  | 5.49E-03 |
| cg27100123 | 18 | 61636779 | TSS1500                   | <i>SERPINB8</i>  | 1.907±0.197  | 2.107±0.31   | 8.25E-05 |
| cg05637351 | 18 | 63417669 | GeneBody/5'UTR/1st intron | <i>CDH7</i>      | -3.9±0.337   | -4.146±0.456 | 2.10E-03 |
| cg25010118 | 18 | 65184398 | TSS1500                   | <i>DSEL</i>      | -3.544±0.455 | -3.911±0.536 | 5.10E-04 |
| cg07457944 | 18 | 67957061 | GeneBody/5'UTR/1st intron | <i>SOC56</i>     | -4.173±0.301 | -4.45±0.46   | 2.57E-04 |
| cg21922574 | 18 | 70535925 | TSS1500                   | <i>NETO1</i>     | -5.05±0.455  | -5.412±0.602 | 8.23E-04 |
| cg03954150 | 18 | 71815372 | TSS1500                   | <i>FBXO15</i>    | -5.197±0.39  | -5.428±0.377 | 6.05E-03 |
| cg10878998 | 18 | 71959092 | GeneBody/1st exon         | <i>CYB5A</i>     | -3.779±0.332 | -3.994±0.487 | 7.43E-03 |
| cg27662877 | 18 | 71959595 | TSS1500                   | <i>CYB5A</i>     | -4.996±0.591 | -5.43±0.562  | 8.38E-04 |
| cg01794711 | 18 | 72163198 | TSS1500                   | <i>CNDP2</i>     | -5.122±0.449 | -5.399±0.484 | 5.34E-03 |
| cg22080282 | 18 | 72920932 | GeneBody/1st exon         | <i>ZADH2</i>     | -3.289±0.173 | -3.497±0.343 | 3.07E-05 |
| cg12555907 | 18 | 74845422 | TSS1500                   | <i>MBP</i>       | 0.779±0.235  | 0.942±0.271  | 2.25E-03 |
| cg05896682 | 18 | 74964030 | GeneBody/1st intron       | <i>GALR1</i>     | -1.81±0.614  | -2.185±0.582 | 4.72E-03 |
| cg16961218 | 18 | 76829143 | TSS1500                   | <i>ATP9B</i>     | -5.05±0.416  | -5.532±0.56  | 4.99E-06 |
| cg06973760 | 18 | 77154869 | TSS1500                   | <i>NFATC1</i>    | -4.31±0.309  | -4.571±0.436 | 5.35E-04 |
| cg00870662 | 18 | 78005665 | TSS1500                   | <i>PARD6G</i>    | -4.123±0.369 | -4.365±0.445 | 4.20E-03 |
| cg17357984 | 19 | 532039   | GeneBody/1st exon         | <i>CDC34</i>     | -5.063±0.455 | -5.378±0.423 | 1.45E-03 |
| cg01532103 | 19 | 571107   | TSS200                    | <i>BSG</i>       | -4.062±0.379 | -4.492±0.44  | 4.06E-06 |
| cg17283268 | 19 | 633490   | GeneBody/1st exon         | <i>POLRMT</i>    | -4.882±0.484 | -5.189±0.544 | 4.65E-03 |
| cg18384168 | 19 | 639746   | TSS200                    | <i>FGF22</i>     | -4.924±0.578 | -5.457±0.545 | 5.40E-05 |
| cg10107671 | 19 | 647289   | 0                         | 0                | 4.913±0.45   | 5.189±0.543  | 7.00E-03 |
| cg03410718 | 19 | 647423   | 0                         | 0                | 3.172±0.215  | 3.302±0.228  | 6.21E-03 |
| cg02364038 | 19 | 797109   | TSS1500                   | <i>PTBP1</i>     | -4.599±0.493 | -5.093±0.653 | 4.50E-05 |
| cg25536300 | 19 | 797459   | GeneBody/5'UTR/1st exon   | <i>PTBP1</i>     | -6.324±0.654 | -6.803±0.668 | 9.97E-04 |
| cg17823175 | 19 | 828170   | GeneBody/1st intron       | <i>AZU1</i>      | 1.622±0.249  | 1.873±0.331  | 4.03E-05 |
| cg09134726 | 19 | 841082   | GeneBody/1st intron       | <i>PRTN3</i>     | 0.999±0.254  | 1.181±0.285  | 1.48E-03 |
| cg07584959 | 19 | 892937   | GeneBody/5'UTR/1st intron | <i>MED16</i>     | -3.778±0.497 | -4.142±0.635 | 1.73E-03 |
| cg21552947 | 19 | 893353   | TSS200                    | <i>MED16</i>     | -4.583±0.44  | -5.01±0.617  | 8.91E-05 |
| cg09675889 | 19 | 912839   | GeneBody/1st intron       | <i>R3HDM4</i>    | -4.186±0.342 | -4.425±0.447 | 2.76E-03 |
| cg18022193 | 19 | 913536   | TSS1500                   | <i>R3HDM4</i>    | -4.807±0.434 | -5.411±0.602 | 2.16E-07 |
| cg09717545 | 19 | 917707   | GeneBody/1st exon         | <i>KISS1R</i>    | -3.707±0.224 | -3.566±0.299 | 7.24E-03 |
| cg25467603 | 19 | 984168   | TSS200                    | <i>WDR18</i>     | -5.855±0.658 | -6.513±0.698 | 2.22E-05 |
| cg24216915 | 19 | 984750   | GeneBody/1st intron       | <i>WDR18</i>     | -5.099±0.561 | -5.557±0.593 | 3.26E-04 |
| cg20147100 | 19 | 1020733  | GeneBody/1st intron       | <i>TMEM259</i>   | -5.271±0.561 | -5.611±0.594 | 5.85E-03 |
| cg10749413 | 19 | 1041020  | GeneBody/5'UTR/1st intron | <i>ABCA7</i>     | -4.806±0.38  | -5.132±0.475 | 2.87E-04 |
| cg18950617 | 19 | 1066959  | TSS1500                   | <i>HMHA1</i>     | -5.314±0.402 | -5.656±0.617 | 6.87E-04 |
| cg04402021 | 19 | 1094921  | GeneBody/1st intron       | <i>POLR2E</i>    | -5.279±0.448 | -5.554±0.543 | 7.16E-03 |
| cg12719235 | 19 | 1095626  | TSS1500                   | <i>POLR2E</i>    | -3.186±0.322 | -3.42±0.324  | 1.01E-03 |
| cg17812013 | 19 | 1104136  | GeneBody/1st intron       | <i>GPX4</i>      | -4.867±0.296 | -5.071±0.386 | 3.16E-03 |
| cg06864275 | 19 | 1174154  | GeneBody/5'UTR/1st intron | <i>SBN02</i>     | -5.25±0.433  | -5.74±0.6    | 8.31E-06 |
| cg07960846 | 19 | 1205323  | TSS1500                   | <i>STK11</i>     | -4.053±0.319 | -4.268±0.281 | 1.74E-03 |
| cg13841138 | 19 | 1205889  | GeneBody/5'UTR/1st exon   | <i>STK11</i>     | -5.782±0.552 | -6.366±0.603 | 9.97E-06 |
| cg21547976 | 19 | 1206451  | GeneBody/5'UTR/1st exon   | <i>STK11</i>     | -4.923±0.33  | -5.374±0.643 | 3.15E-06 |
| cg18194038 | 19 | 1270018  | GeneBody/1st exon         | <i>CIRBP-AS1</i> | -4.143±0.373 | -4.438±0.378 | 4.28E-04 |
| cg25622628 | 19 | 1275762  | GeneBody/1st exon         | <i>C19orf24</i>  | -5.539±0.518 | -5.896±0.625 | 2.58E-03 |
| cg10716163 | 19 | 1355910  | TSS1500                   | <i>MUM1</i>      | -3.786±0.341 | -4.017±0.466 | 4.28E-03 |
| cg17669700 | 19 | 1384167  | GeneBody/1st intron       | <i>NDUFS7</i>    | -5.368±0.606 | -5.76±0.552  | 2.68E-03 |
| cg00308133 | 19 | 1401118  | GeneBody/1st intron       | <i>GAMT</i>      | -5.549±0.349 | -6.02±0.646  | 2.61E-06 |
| cg17765461 | 19 | 1408416  | GeneBody/1st intron       | <i>DAZAP1</i>    | -3.77±0.625  | -4.368±0.648 | 4.04E-05 |
| cg26260201 | 19 | 1490631  | TSS1500                   | <i>PCSK4</i>     | -5.906±0.432 | -6.281±0.482 | 1.75E-04 |
| cg26982998 | 19 | 1592158  | GeneBody/1st intron       | <i>MBD3</i>      | -4.564±0.431 | -4.846±0.542 | 4.58E-03 |
| cg11792664 | 19 | 1605706  | TSS1500                   | <i>UQCR11</i>    | -5.033±0.367 | -5.292±0.549 | 4.02E-03 |
| cg16524139 | 19 | 1651573  | GeneBody/5'UTR/1st intron | <i>TCF3</i>      | -4.716±0.293 | -4.906±0.294 | 3.09E-03 |
| cg05970437 | 19 | 1864622  | TSS1500                   | <i>KLF16</i>     | -4.352±0.358 | -4.557±0.367 | 7.76E-03 |
| cg14658285 | 19 | 1905417  | GeneBody/5'UTR/1st exon   | <i>SCAMP4</i>    | -5.959±0.537 | -6.356±0.592 | 1.06E-03 |
| cg26776924 | 19 | 1969666  | GeneBody/5'UTR            | <i>CSNK1G2</i>   | 2.573±0.274  | 2.785±0.329  | 8.28E-04 |
| cg24355006 | 19 | 1969744  | GeneBody/5'UTR            | <i>CSNK1G2</i>   | 3.066±0.207  | 3.288±0.381  | 9.58E-05 |
| cg04224968 | 19 | 2096759  | TSS200                    | <i>IZUMO4</i>    | -3.673±0.502 | -3.982±0.535 | 5.25E-03 |
| cg19939660 | 19 | 2097096  | GeneBody/1st exon         | <i>IZUMO4</i>    | -5.241±0.518 | -5.751±0.515 | 2.38E-05 |
| cg14223017 | 19 | 2151266  | GeneBody/1st exon         | <i>AP3D1</i>     | -2.012±0.414 | -1.617±0.451 | 4.64E-05 |
| cg02252907 | 19 | 2151887  | TSS1500                   | <i>AP3D1</i>     | -4.72±0.665  | -5.324±0.635 | 6.68E-05 |
| cg15927263 | 19 | 2236466  | TSS200                    | <i>PLEKHJ1</i>   | -4.927±0.346 | -5.267±0.463 | 6.10E-05 |
| cg00040861 | 19 | 2328391  | GeneBody                  | <i>LSM7</i>      | -5.192±0.526 | -5.619±0.539 | 3.21E-04 |
| cg22510943 | 19 | 2456368  | GeneBody/1st intron       | <i>LMNB2</i>     | -2.57±0.556  | -2.918±0.543 | 3.93E-03 |
| cg14047244 | 19 | 2457194  | TSS1500                   | <i>LMNB2</i>     | -4.741±0.302 | -5.02±0.446  | 2.12E-04 |

|            |    |          |                           |                    |              |              |          |
|------------|----|----------|---------------------------|--------------------|--------------|--------------|----------|
| cg08259617 | 19 | 2476129  | GeneBody/5'UTR/1st exon   | <i>GADD45B</i>     | -5.066±0.477 | -5.33±0.425  | 9.25E-03 |
| cg18138500 | 19 | 2653655  | GeneBody/5'UTR/1st intron | <i>GNG7</i>        | 0.298±0.193  | 0.17±0.209   | 2.79E-03 |
| cg17226343 | 19 | 2720776  | GeneBody/5'UTR/1st intron | <i>DIRAS1</i>      | -3.738±0.438 | -4.061±0.406 | 7.57E-04 |
| cg08265265 | 19 | 2740053  | GeneBody/5'UTR/1st exon   | <i>SLC39A3</i>     | -4.188±0.368 | -4.436±0.586 | 7.08E-03 |
| cg09630437 | 19 | 2740301  | TSS1500                   | <i>SLC39A3</i>     | -2.978±0.244 | -3.127±0.259 | 5.61E-03 |
| cg05516832 | 19 | 2783122  | GeneBody/5'UTR/1st intron | <i>SGTA</i>        | -4.579±0.351 | -4.773±0.331 | 9.91E-03 |
| cg16188243 | 19 | 2783719  | TSS1500                   | <i>SGTA</i>        | -3.235±0.44  | -3.598±0.638 | 7.63E-04 |
| cg06609049 | 19 | 2785107  | TSS1500                   | <i>THOP1</i>       | -1.184±0.538 | -0.838±0.581 | 3.74E-03 |
| cg14271499 | 19 | 2785891  | GeneBody/1st intron       | <i>THOP1</i>       | -5.015±0.351 | -5.219±0.334 | 6.95E-03 |
| cg02298570 | 19 | 2840764  | TSS1500                   | <i>ZNF555</i>      | 0.137±0.254  | -0.086±0.629 | 5.64E-03 |
| cg12111697 | 19 | 2841391  | TSS200                    | <i>ZNF555</i>      | -5.297±0.489 | -5.636±0.53  | 1.92E-03 |
| cg18414741 | 19 | 2945201  | TSS1500                   | <i>ZNF77</i>       | -5.882±0.686 | -6.339±0.663 | 2.23E-03 |
| cg20616836 | 19 | 3064281  | TSS1500                   | <i>AES</i>         | 2.947±0.171  | 3.098±0.303  | 9.37E-04 |
| cg26114571 | 19 | 3225002  | GeneBody/1st intron       | <i>CELF5</i>       | -5.22±0.56   | -5.544±0.483 | 6.31E-03 |
| cg26044825 | 19 | 3358992  | TSS1500                   | <i>NFIC</i>        | -5.267±0.417 | -5.638±0.582 | 2.75E-04 |
| cg25834275 | 19 | 3359809  | GeneBody/1st intron       | <i>NFIC</i>        | -6.006±0.544 | -6.346±0.489 | 3.55E-03 |
| cg23035555 | 19 | 3500370  | GeneBody/5'UTR/1st intron | <i>DOHH</i>        | -4.343±0.382 | -4.679±0.53  | 2.13E-04 |
| cg25219047 | 19 | 3500813  | GeneBody/5'UTR/1st exon   | <i>DOHH</i>        | -4.518±0.338 | -4.756±0.553 | 5.48E-03 |
| cg09998229 | 19 | 3606757  | GeneBody/5'UTR/1st exon   | <i>TBXA2R</i>      | -3.873±0.257 | -4.073±0.459 | 3.26E-03 |
| cg25058957 | 19 | 3771683  | GeneBody                  | <i>RAX2</i>        | 3.776±0.221  | 3.575±0.398  | 7.00E-04 |
| cg27601582 | 19 | 3933195  | GeneBody/5'UTR/1st intron | <i>NMRK2</i>       | -4.01±0.441  | -4.302±0.517 | 3.56E-03 |
| cg16142977 | 19 | 3985688  | TSS1500                   | <i>EEF2</i>        | -4.913±0.655 | -5.425±0.727 | 6.05E-04 |
| cg17655576 | 19 | 4007179  | TSS1500                   | <i>PIAS4</i>       | -5.333±0.625 | -5.851±0.603 | 2.27E-04 |
| cg13619768 | 19 | 4008209  | GeneBody/1st intron       | <i>PIAS4</i>       | -5.097±0.458 | -5.508±0.512 | 1.12E-04 |
| cg10561472 | 19 | 4066818  | TSS200                    | <i>ZBTB7A</i>      | -4.891±0.593 | -5.253±0.543 | 4.48E-03 |
| cg02518671 | 19 | 4182691  | TSS200                    | <i>SIRT6</i>       | -4.354±0.29  | -4.53±0.246  | 4.04E-03 |
| cg20395128 | 19 | 4243436  | 0                         | 0                  | 1.686±0.318  | 1.461±0.422  | 2.21E-03 |
| cg25327247 | 19 | 4400302  | GeneBody/1st intron       | <i>SH3GL1</i>      | -3.54±0.355  | -3.761±0.501 | 9.18E-03 |
| cg24923526 | 19 | 4400879  | TSS1500                   | <i>SH3GL1</i>      | -4.551±0.426 | -4.987±0.546 | 2.86E-05 |
| cg04765929 | 19 | 4639662  | GeneBody/5'UTR/1st intron | <i>TNFAIP8L1</i>   | -5.078±0.605 | -5.639±0.593 | 5.29E-05 |
| cg04947578 | 19 | 4669928  | GeneBody/1st intron       | <i>C19orf10</i>    | -4.333±0.334 | -4.625±0.269 | 8.12E-05 |
| cg07456645 | 19 | 4769146  | GeneBody/1st exon         | <i>MIR7-3HG</i>    | -2.771±0.39  | -3.036±0.439 | 2.52E-03 |
| cg19646028 | 19 | 4769240  | GeneBody/1st exon         | <i>MIR7-3HG</i>    | -1.547±0.284 | -1.826±0.367 | 5.27E-05 |
| cg26336164 | 19 | 4791680  | TSS200                    | <i>FEM1A</i>       | -5.991±0.642 | -6.45±0.785  | 1.89E-03 |
| cg25771201 | 19 | 5679653  | TSS1500                   | <i>HSD11B1L</i>    | 1.268±0.167  | 1.377±0.238  | 6.60E-03 |
| cg22563182 | 19 | 5680756  | TSS200                    | <i>HSD11B1L</i>    | -5.236±0.419 | -5.58±0.399  | 2.48E-04 |
| cg25136310 | 19 | 5690528  | GeneBody/1st exon         | <i>RPL36</i>       | -4.132±0.231 | -4.312±0.337 | 1.43E-03 |
| cg09456329 | 19 | 5720392  | GeneBody/5'UTR/1st exon   | <i>LONP1</i>       | -5.325±0.537 | -5.684±0.51  | 2.09E-03 |
| cg13451483 | 19 | 5720795  | GeneBody/1st exon         | <i>CATSPERD</i>    | -4.951±0.638 | -5.459±0.647 | 3.95E-04 |
| cg18891387 | 19 | 5903977  | GeneBody/5'UTR/1st exon   | <i>NDUFA11</i>     | -4.87±0.266  | -5.085±0.322 | 5.26E-04 |
| cg01513611 | 19 | 5904233  | TSS1500                   | <i>NDUFA11</i>     | -4.028±0.379 | -4.288±0.503 | 3.46E-03 |
| cg18109231 | 19 | 6110877  | TSS1500                   | <i>RFX2</i>        | -4.504±0.344 | -4.868±0.354 | 8.60E-06 |
| cg00901766 | 19 | 6279546  | GeneBody/1st intron       | <i>MLLT1</i>       | -3.469±0.353 | -3.714±0.573 | 6.01E-03 |
| cg17756392 | 19 | 6361455  | TSS200                    | <i>CLPP</i>        | -4.334±0.241 | -4.488±0.314 | 6.17E-03 |
| cg13120519 | 19 | 6372660  | GeneBody/5'UTR/1st exon   | <i>ALKBH7</i>      | -4.154±0.204 | -4.285±0.265 | 5.75E-03 |
| cg03925809 | 19 | 6393419  | TSS200                    | <i>GTF2F1</i>      | -5.991±0.598 | -6.392±0.547 | 1.95E-03 |
| cg00522316 | 19 | 6425042  | TSS1500                   | <i>KHSRP</i>       | -4.018±0.31  | -4.29±0.458  | 4.18E-04 |
| cg23263923 | 19 | 6591204  | TSS200                    | <i>CD70</i>        | -4.379±0.304 | -4.619±0.333 | 5.29E-04 |
| cg05399707 | 19 | 6739813  | GeneBody/1st intron       | <i>TRIP10</i>      | -5.046±0.502 | -5.475±0.423 | 1.21E-04 |
| cg02981853 | 19 | 7445850  | 0                         | 0                  | 1.219±0.262  | 1.371±0.286  | 8.55E-03 |
| cg17159537 | 19 | 7554074  | TSS200                    | <i>PEX11G</i>      | -4.212±0.274 | -4.515±0.51  | 6.74E-05 |
| cg23350087 | 19 | 7587498  | GeneBody/5'UTR/1st exon   | <i>MCOLN1</i>      | -5.278±0.399 | -5.645±0.596 | 2.41E-04 |
| cg06586599 | 19 | 7587541  | GeneBody/5'UTR/1st exon   | <i>MCOLN1</i>      | -5.133±0.412 | -5.388±0.375 | 3.92E-03 |
| cg00098239 | 19 | 7599173  | GeneBody/5'UTR/1st exon   | <i>PNPLA6</i>      | -5.157±0.396 | -5.676±0.589 | 9.81E-07 |
| cg20692181 | 19 | 7733174  | TSS1500                   | <i>RETN</i>        | 1.082±0.293  | 0.899±0.416  | 9.37E-03 |
| cg01556075 | 19 | 7741454  | TSS1500                   | <i>C19orf59</i>    | -2.882±0.298 | -3.089±0.378 | 2.74E-03 |
| cg07608333 | 19 | 7813422  | TSS1500                   | <i>CD209</i>       | 0.188±0.222  | 0.023±0.304  | 1.76E-03 |
| cg14106632 | 19 | 7895393  | GeneBody/5'UTR/1st intron | <i>EVI5L</i>       | -3.222±0.182 | -3.421±0.331 | 7.04E-05 |
| cg24391122 | 19 | 7986137  | GeneBody/1st intron       | <i>SNAPC2</i>      | -4.65±0.423  | -4.965±0.481 | 1.06E-03 |
| cg04351979 | 19 | 7990281  | GeneBody                  | <i>CTXN1</i>       | -5.809±0.555 | -6.129±0.557 | 7.99E-03 |
| cg16860587 | 19 | 8069925  | GeneBody/5'UTR/1st intron | <i>ELAVL1</i>      | -4.558±0.326 | -4.805±0.374 | 9.11E-04 |
| cg05346899 | 19 | 8273912  | TSS1500                   | <i>CERS4</i>       | -4.249±0.362 | -4.604±0.478 | 5.88E-05 |
| cg06277481 | 19 | 8408146  | GeneBody/5'UTR/1st exon   | <i>KANK3</i>       | -4.68±0.363  | -4.986±0.508 | 5.36E-04 |
| cg20970875 | 19 | 8408337  | TSS200                    | <i>KANK3</i>       | -4.948±0.332 | -5.201±0.352 | 7.13E-04 |
| cg20505409 | 19 | 8429160  | GeneBody/5'UTR/1st exon   | <i>ANGPTL4</i>     | -4.558±0.448 | -4.944±0.597 | 3.44E-04 |
| cg02868306 | 19 | 8455008  | TSS200                    | <i>RAB11B</i>      | -3.674±0.239 | -3.903±0.24  | 3.58E-05 |
| cg17477756 | 19 | 8509471  | TSS1500                   | <i>HNRNPM</i>      | -3.492±0.433 | -3.904±0.569 | 9.13E-05 |
| cg17043366 | 19 | 8578907  | GeneBody/1st intron       | <i>ZNF414</i>      | -5.421±0.467 | -5.849±0.526 | 8.76E-05 |
| cg17454897 | 19 | 8675471  | GeneBody/5'UTR/1st intron | <i>ADAMTS10</i>    | -5.139±0.651 | -5.955±0.673 | 6.12E-07 |
| cg18931750 | 19 | 8809345  | TSS200                    | <i>ACTL9</i>       | 2.914±0.266  | 3.149±0.321  | 1.67E-04 |
| cg05357320 | 19 | 9251080  | GeneBody/5'UTR/1st exon   | <i>ZNF317</i>      | -5.044±0.508 | -5.488±0.533 | 1.39E-04 |
| cg26674132 | 19 | 9434637  | GeneBody/5'UTR/1st exon   | <i>ZNF559</i>      | -1.902±0.376 | -1.571±0.443 | 1.65E-04 |
| cg06717231 | 19 | 9434953  | GeneBody/5'UTR/1st exon   | <i>ZNF559</i>      | -5.927±0.593 | -6.256±0.537 | 9.19E-03 |
| cg09643544 | 19 | 9473696  | GeneBody/5'UTR/1st exon   | <i>ZNF177</i>      | -2.079±0.322 | -2.274±0.435 | 9.97E-03 |
| cg07306197 | 19 | 9546377  | TSS200                    | <i>ZNF266</i>      | -5.626±0.655 | -6.245±0.554 | 3.19E-05 |
| cg19899621 | 19 | 9731817  | GeneBody/5'UTR/1st intron | <i>ZNF561</i>      | -3.476±0.218 | -3.708±0.487 | 4.31E-04 |
| cg27611665 | 19 | 9929320  | GeneBody/1st intron       | <i>FBXL12</i>      | -5.543±0.411 | -5.94±0.711  | 2.72E-04 |
| cg13946500 | 19 | 10217312 | GeneBody                  | <i>PPAN-P2RY11</i> | -4.532±0.31  | -4.723±0.368 | 6.37E-03 |
| cg24911803 | 19 | 10230727 | TSS200                    | <i>EIF3G</i>       | -4.077±0.281 | -4.263±0.371 | 4.62E-03 |
| cg15043801 | 19 | 10305911 | TSS200                    | <i>DNMT1</i>       | -4.371±0.349 | -4.62±0.346  | 1.23E-03 |
| cg04762346 | 19 | 10341584 | GeneBody/5'UTR/1st intron | <i>S1PR2</i>       | -4.791±0.415 | -5.085±0.582 | 3.08E-03 |
| cg06716436 | 19 | 10342240 | TSS1500                   | <i>S1PR2</i>       | -4.729±0.326 | -5.083±0.531 | 3.76E-05 |
| cg04912278 | 19 | 10362688 | GeneBody/5'UTR/1st exon   | <i>MRPL4</i>       | -4.848±0.578 | -5.272±0.601 | 1.02E-03 |
| cg22874046 | 19 | 10381763 | GeneBody/5'UTR/1st exon   | <i>ICAM1</i>       | -5.925±0.478 | -6.287±0.643 | 1.42E-03 |
| cg08607082 | 19 | 10381924 | GeneBody/1st intron       | <i>ICAM1</i>       | -4.379±0.34  | -4.622±0.41  | 1.82E-03 |
| cg02764611 | 19 | 10426516 | GeneBody/1st intron       | <i>FDX1L</i>       | -5.002±0.532 | -5.523±0.55  | 2.90E-05 |
| cg06855803 | 19 | 10450364 | TSS200                    | <i>ICAM3</i>       | -0.63±0.166  | -0.753±0.212 | 1.56E-03 |
| cg08896629 | 19 | 10491577 | TSS1500                   | <i>TYK2</i>        | -4.322±0.336 | -4.58±0.557  | 2.70E-03 |
| cg21459710 | 19 | 10514006 | GeneBody/1st intron       | <i>CDC37</i>       | -3.801±0.327 | -4.076±0.405 | 3.51E-04 |
| cg01522721 | 19 | 10514734 | TSS1500                   | <i>CDC37</i>       | -4.694±0.393 | -5.084±0.556 | 6.84E-05 |
| cg11820497 | 19 | 10654946 | GeneBody/1st exon         | <i>ATG4D</i>       | -4.336±0.467 | -4.716±0.514 | 3.64E-04 |
| cg00770279 | 19 | 10679308 | GeneBody/1st exon         | <i>CDKN2D</i>      | -5.338±0.539 | -5.652±0.545 | 7.48E-03 |
| cg27258787 | 19 | 10764001 | GeneBody/1st exon         | <i>ILF3-AS1</i>    | -5.111±0.449 | -5.446±0.478 | 8.89E-04 |
| cg07685221 | 19 | 10812325 | GeneBody/1st exon         | <i>QTRT1</i>       | -4.245±0.389 | -4.54±0.44   | 8.54E-04 |
| cg08207256 | 19 | 10828848 | GeneBody/5'UTR/1st exon   | <i>DNM2</i>        | -2.528±0.353 | -2.203±0.45  | 1.22E-04 |

|             |    |          |                           |          |              |              |          |
|-------------|----|----------|---------------------------|----------|--------------|--------------|----------|
| cg10948777  | 19 | 10828972 | TSS200                    | MIR638   | -5.257±0.487 | -5.59±0.553  | 2.38E-03 |
| cg17165284  | 19 | 10829165 | GeneBody/1st exon         | MIR638   | -3.026±0.263 | -2.801±0.365 | 4.43E-04 |
| cg15392792  | 19 | 10829173 | GeneBody/1st exon         | MIR638   | -4.332±0.382 | -4.579±0.572 | 8.21E-03 |
| cg07248407  | 19 | 10829176 | GeneBody/1st exon         | MIR638   | -4.952±0.384 | -5.207±0.476 | 3.93E-03 |
| cg05051316  | 19 | 10946973 | GeneBody/5'UTR/1st exon   | TMED1    | -5.654±0.541 | -5.997±0.577 | 4.18E-03 |
| cg02077793  | 19 | 10983098 | GeneBody/1st intron       | CARM1    | -3.023±0.644 | -3.699±0.656 | 9.59E-06 |
| cg04849025  | 19 | 11038957 | GeneBody                  | YIPF2    | -4.683±0.343 | -4.999±0.39  | 8.33E-05 |
| cg24352736  | 19 | 11040012 | GeneBody                  | C19orf52 | -5.227±0.452 | -5.563±0.586 | 1.55E-03 |
| cg17747332  | 19 | 11071239 | TSS1500                   | SMARCA4  | -4.214±0.253 | -4.442±0.567 | 2.53E-03 |
| cg12411068  | 19 | 11072235 | GeneBody/5'UTR/1st intron | SMARCA4  | -5.233±0.472 | -5.584±0.587 | 1.39E-03 |
| cg05249393  | 19 | 11199883 | TSS200                    | LDLR     | -3.951±0.579 | -4.422±0.659 | 4.06E-04 |
| cg23943360  | 19 | 11200146 | GeneBody/5'UTR/1st exon   | LDLR     | -4.839±0.565 | -5.293±0.481 | 2.58E-04 |
| cg05554936  | 19 | 11450261 | GeneBody/5'UTR/1st exon   | RAB3D    | -5.393±0.611 | -5.788±0.636 | 3.35E-03 |
| cg20780953  | 19 | 11450511 | TSS200                    | RAB3D    | -4.014±0.304 | -4.203±0.352 | 5.62E-03 |
| cg07099627  | 19 | 11466020 | TSS200                    | LPPR2    | -4.758±0.413 | -5.101±0.608 | 7.39E-04 |
| cg12754733  | 19 | 11485436 | GeneBody/1st exon         | SWSAP1   | -4.473±0.226 | -4.835±0.43  | 1.23E-07 |
| cg26864028  | 19 | 11494980 | GeneBody/1st exon         | EPOR     | -4.08±0.335  | -4.347±0.5   | 1.22E-03 |
| cg00598858  | 19 | 11545966 | GeneBody/5'UTR/1st exon   | CCDC151  | -5.057±0.46  | -5.446±0.545 | 2.85E-04 |
| cg11705439  | 19 | 11546473 | GeneBody/5'UTR/1st exon   | PRKCSH   | -5.208±0.444 | -5.571±0.434 | 2.63E-04 |
| cg10707300  | 19 | 11616032 | GeneBody/1st intron       | ZNF653   | -4.391±0.389 | -4.62±0.38   | 6.54E-03 |
| cg21584983  | 19 | 11640070 | TSS200                    | ECSIT    | -4.765±0.42  | -5.122±0.532 | 3.33E-04 |
| cg03405173  | 19 | 11877721 | TSS200                    | ZNF441   | -4.305±0.335 | -4.5±0.31    | 6.61E-03 |
| cg18997662  | 19 | 11877947 | GeneBody/5'UTR/1st exon   | ZNF441   | -4.935±0.393 | -5.205±0.444 | 2.24E-03 |
| cg19526626  | 19 | 11909408 | GeneBody/5'UTR/1st exon   | ZNF491   | -5.061±0.452 | -5.501±0.453 | 2.86E-05 |
| cg004311606 | 19 | 12273886 | GeneBody/5'UTR/1st exon   | ZNF136   | -5.449±0.391 | -5.879±0.567 | 1.62E-05 |
| cg007133682 | 19 | 12405568 | GeneBody/5'UTR/1st exon   | ZNF44    | -5.6±0.602   | -6.025±0.591 | 1.32E-03 |
| cg22998811  | 19 | 12444541 | TSS200                    | ZNF563   | -4.763±0.425 | -5.164±0.617 | 1.50E-04 |
| cg03809891  | 19 | 12476514 | TSS200                    | ZNF442   | -5.543±0.512 | -5.881±0.569 | 3.24E-03 |
| cg12434258  | 19 | 12721799 | GeneBody/5'UTR/1st exon   | ZNF791   | -5.199±0.498 | -5.52±0.681  | 6.32E-03 |
| cg20791841  | 19 | 12777736 | GeneBody/1st exon         | WDR83    | -4.402±0.311 | -4.707±0.431 | 7.03E-05 |
| cg03143365  | 19 | 12777903 | GeneBody/1st intron       | WDR83    | -3.983±0.419 | -4.335±0.483 | 2.85E-04 |
| cg00033773  | 19 | 12779366 | GeneBody                  | WDR83OS  | 2.171±0.213  | 2.386±0.265  | 3.22E-05 |
| cg19191883  | 19 | 12780323 | GeneBody/5'UTR/1st exon   | WDR83OS  | -4.635±0.353 | -4.948±0.549 | 4.52E-04 |
| cg25263559  | 19 | 12780830 | GeneBody                  | WDR83    | -4.94±0.617  | -5.309±0.658 | 6.63E-03 |
| cg17742874  | 19 | 12792761 | TSS200                    | DHPS     | -5.162±0.434 | -5.476±0.456 | 1.20E-03 |
| cg06489804  | 19 | 12807371 | GeneBody/1st exon         | FBXW9    | -5.033±0.433 | -5.276±0.359 | 7.63E-03 |
| cg05868316  | 19 | 12807494 | TSS200                    | FBXW9    | -6.353±0.63  | -6.996±0.71  | 1.95E-05 |
| cg02914419  | 19 | 12848364 | GeneBody/1st exon         | ASNA1    | -4.086±0.333 | -4.447±0.383 | 8.03E-06 |
| cg05657090  | 19 | 12917086 | TSS1500                   | RNASEH2A | 2.968±0.202  | 3.143±0.333  | 8.06E-04 |
| cg20966551  | 19 | 12949060 | TSS200                    | MAST1    | -4.855±0.322 | -5.171±0.493 | 1.12E-04 |
| cg19721215  | 19 | 13001564 | TSS1500                   | GCDH     | -4.644±0.329 | -5.014±0.511 | 1.65E-05 |
| cg03140096  | 19 | 13044717 | TSS200                    | FARSA    | -5.313±0.505 | -5.67±0.385  | 8.97E-04 |
| cg11228872  | 19 | 13049259 | TSS200                    | CALR     | -4.756±0.32  | -5.103±0.505 | 3.18E-05 |
| cg15177917  | 19 | 13080409 | TSS200                    | DAND5    | -1.452±0.23  | -1.6±0.288   | 5.08E-03 |
| cg06661765  | 19 | 13106629 | GeneBody/5'UTR/1st exon   | NFIX     | -4.918±0.519 | -5.297±0.562 | 1.16E-03 |
| cg02229516  | 19 | 13227228 | GeneBody/5'UTR/1st exon   | TRMT1    | -4.698±0.388 | -4.978±0.302 | 7.62E-04 |
| cg03135127  | 19 | 13227421 | GeneBody/5'UTR/1st exon   | TRMT1    | -3.692±0.357 | -3.92±0.436  | 5.12E-03 |
| cg17753124  | 19 | 13259872 | GeneBody                  | STX10    | 0.005±0.224  | 0.254±0.246  | 4.63E-06 |
| cg11025793  | 19 | 13262015 | GeneBody/5'UTR/1st intron | IER2     | -2.779±0.644 | -3.173±0.624 | 4.78E-03 |
| cg18011401  | 19 | 13617366 | TSS200                    | CACNA1A  | -3.604±0.413 | -3.844±0.486 | 9.89E-03 |
| cg15755406  | 19 | 13859137 | GeneBody/5'UTR/1st intron | CCDC130  | -4.27±0.523  | -4.627±0.726 | 4.19E-03 |
| cg09952620  | 19 | 13885098 | TSS200                    | C19orf53 | -2.835±0.513 | -3.168±0.673 | 5.53E-03 |
| cg20084646  | 19 | 13885320 | GeneBody/1st exon         | C19orf53 | -6.152±0.541 | -6.529±0.525 | 1.49E-03 |
| cg03430067  | 19 | 14016927 | TSS200                    | C19orf57 | -2.795±0.394 | -2.375±0.416 | 8.06E-06 |
| cg17725461  | 19 | 14117250 | TSS200                    | RFX1     | -5.613±0.402 | -5.936±0.486 | 5.51E-04 |
| cg00722300  | 19 | 14138639 | TSS1500                   | RLN3     | 0.496±0.374  | 0.204±0.574  | 1.72E-03 |
| cg12116020  | 19 | 14228622 | TSS200                    | PRKACA   | -4.08±0.327  | -4.349±0.501 | 9.80E-04 |
| cg03856723  | 19 | 14229466 | TSS1500                   | PRKACA   | -3.665±0.305 | -3.924±0.426 | 4.98E-04 |
| cg14203758  | 19 | 14247374 | GeneBody/5'UTR/1st exon   | ASF1B    | -4.543±0.28  | -4.741±0.333 | 1.97E-03 |
| cg12937807  | 19 | 14318115 | TSS1500                   | LPHN1    | -4.512±0.554 | -4.89±0.715  | 3.46E-03 |
| cg20314660  | 19 | 14530105 | GeneBody/1st exon         | DDX39A   | -5.173±0.466 | -5.444±0.54  | 9.65E-03 |
| cg27524460  | 19 | 14586840 | TSS1500                   | PTGER1   | -1.419±0.16  | -1.542±0.221 | 1.31E-03 |
| cg13150596  | 19 | 14606390 | GeneBody/5'UTR/1st intron | GIPC1    | -3.741±0.316 | -4.031±0.409 | 1.36E-04 |
| cg12846938  | 19 | 14640140 | TSS1500                   | MIR639   | -3.075±0.476 | -3.421±0.729 | 3.29E-03 |
| cg23824815  | 19 | 14800772 | TSS200                    | ZNF333   | -4.118±0.325 | -4.495±0.601 | 3.25E-05 |
| cg24102360  | 19 | 14801145 | GeneBody/5'UTR/1st intron | ZNF333   | -4.341±0.352 | -4.693±0.54  | 9.03E-05 |
| cg05112299  | 19 | 14991491 | GeneBody/1st exon         | ORTA17   | -0.233±0.158 | -0.337±0.203 | 4.64E-03 |
| cg16763895  | 19 | 15235973 | GeneBody/5'UTR/1st intron | ILVBL    | -4.269±0.272 | -4.646±0.565 | 4.43E-06 |
| cg09395833  | 19 | 15236755 | TSS200                    | ILVBL    | -3.801±0.617 | -4.164±0.555 | 5.90E-03 |
| cg21336547  | 19 | 15490553 | GeneBody/5'UTR/1st exon   | AKAP8    | -5.381±0.539 | -5.952±0.651 | 1.32E-05 |
| cg26968812  | 19 | 16186873 | TSS1500                   | TPM4     | -2.852±0.418 | -3.146±0.458 | 1.73E-03 |
| cg06816063  | 19 | 16222510 | GeneBody/5'UTR/1st exon   | RAB8A    | -5.338±0.412 | -5.586±0.531 | 9.41E-03 |
| cg09686308  | 19 | 16284242 | GeneBody/1st exon         | CIB3     | 0.493±0.18   | 0.778±0.343  | 1.35E-07 |
| cg17592812  | 19 | 16296137 | TSS200                    | FAM32A   | -5.588±0.511 | -5.883±0.449 | 6.60E-03 |
| cg23919568  | 19 | 16296265 | GeneBody/1st exon         | FAM32A   | -4.029±0.328 | -4.373±0.467 | 3.05E-05 |
| cg04898512  | 19 | 16434995 | TSS1500                   | KLF2     | 2.592±0.198  | 2.717±0.275  | 7.54E-03 |
| cg17847607  | 19 | 16606955 | GeneBody/5'UTR/1st exon   | CALR3    | -4.795±0.371 | -5.108±0.307 | 1.34E-04 |
| cg10248733  | 19 | 16607483 | GeneBody/5'UTR/1st intron | C19orf44 | -3.903±0.483 | -4.229±0.403 | 1.57E-03 |
| cg05197908  | 19 | 16653599 | TSS1500                   | CHERP    | -3.873±0.263 | -4.155±0.526 | 1.71E-04 |
| cg08553339  | 19 | 16738737 | GeneBody/1st exon         | MED26    | -5.54±0.654  | -6.218±0.699 | 1.27E-05 |
| cg24459023  | 19 | 16739945 | TSS1500                   | MED26    | -4.56±0.379  | -4.945±0.517 | 4.18E-05 |
| cg22960185  | 19 | 16772516 | GeneBody/1st intron       | TMEM38A  | -5.029±0.472 | -5.304±0.465 | 7.21E-03 |
| cg00215066  | 19 | 17212316 | GeneBody/5'UTR/1st intron | MYO9B    | 3.728±0.224  | 3.957±0.349  | 6.75E-05 |
| cg01103836  | 19 | 17212632 | GeneBody                  | MYO9B    | 5.429±0.372  | 5.729±0.383  | 3.64E-04 |
| cg08891270  | 19 | 17326119 | TSS200                    | USE1     | -5.402±0.668 | -5.884±0.564 | 8.49E-04 |
| cg25713309  | 19 | 17337319 | GeneBody/1st intron       | OCEL1    | -5.824±0.621 | -6.222±0.677 | 3.97E-03 |
| cg07242565  | 19 | 17356142 | GeneBody/5'UTR/1st exon   | NR2F6    | -3.633±0.24  | -3.845±0.355 | 3.92E-04 |
| cg22734480  | 19 | 17414346 | TSS200                    | ABHD8    | -4.729±0.33  | -5.124±0.449 | 3.16E-06 |
| cg19390148  | 19 | 17420389 | GeneBody/5'UTR/1st exon   | DDA1     | -4.744±0.423 | -5.106±0.7   | 8.89E-04 |
| cg14147105  | 19 | 17531148 | GeneBody                  | MVB12A   | -3.973±0.272 | -4.261±0.389 | 2.69E-05 |
| cg10262425  | 19 | 17622362 | TSS200                    | PGLS     | -3.685±0.441 | -3.222±0.535 | 1.63E-05 |
| cg07374145  | 19 | 18111823 | TSS200                    | ARRDC2   | -5.835±0.521 | -6.192±0.48  | 1.61E-03 |
| cg23548920  | 19 | 18112433 | GeneBody/1st intron       | ARRDC2   | -5.163±0.416 | -5.458±0.468 | 1.71E-03 |
| cg13179983  | 19 | 18264162 | GeneBody/5'UTR/1st intron | PIK3R2   | -5.105±0.682 | -5.861±0.689 | 4.02E-06 |
| cg04096365  | 19 | 18284450 | TSS200                    | IFI30    | -4.408±0.313 | -4.694±0.436 | 1.87E-04 |

|            |    |          |                           |                     |              |              |          |
|------------|----|----------|---------------------------|---------------------|--------------|--------------|----------|
| cg01533387 | 19 | 18284728 | GeneBody/1st exon         | <i>IFI30</i>        | -5.171±0.453 | -5.576±0.459 | 9.53E-05 |
| cg26001336 | 19 | 18315002 | TSS200                    | <i>RAB3A</i>        | -4.924±0.365 | -5.174±0.493 | 3.74E-03 |
| cg09251995 | 19 | 18392994 | TSS1500                   | <i>JUND</i>         | -5.808±0.575 | -6.412±0.605 | 1.03E-05 |
| cg15085805 | 19 | 18433592 | GeneBody/1st intron       | <i>LSM4</i>         | -4.274±0.441 | -4.646±0.4   | 1.58E-04 |
| cg09529667 | 19 | 18531111 | GeneBody/1st intron       | <i>SSBP4</i>        | -4.478±0.341 | -4.723±0.37  | 1.36E-03 |
| cg02344201 | 19 | 18632488 | GeneBody/1st intron       | <i>ELL</i>          | -4.655±0.339 | -4.903±0.364 | 1.14E-03 |
| cg17843759 | 19 | 18633053 | TSS200                    | <i>ELL</i>          | -5.004±0.59  | -5.442±0.522 | 6.62E-04 |
| cg10011232 | 19 | 18654949 | TSS1500                   | <i>FKBP8</i>        | -2.745±0.362 | -3.002±0.369 | 1.33E-03 |
| cg06600447 | 19 | 18668837 | GeneBody/5'UTR/1st intron | <i>KXD1</i>         | -4.872±0.282 | -5.034±0.276 | 7.77E-03 |
| cg24356797 | 19 | 18682387 | TSS1500                   | <i>UBA52</i>        | -4.963±0.605 | -5.335±0.651 | 5.45E-03 |
| cg25699533 | 19 | 18682841 | GeneBody/5'UTR/1st intron | <i>UBA52</i>        | -4.817±0.461 | -5.110.564   | 7.15E-03 |
| cg12558519 | 19 | 18748017 | GeneBody/1st intron       | <i>KLHL26</i>       | -3.791±0.3   | -4.012±0.471 | 3.04E-03 |
| cg05501721 | 19 | 18794247 | TSS200                    | <i>CRTC1</i>        | -5.462±0.575 | -5.933±0.593 | 2.94E-04 |
| cg15784332 | 19 | 18902172 | TSS200                    | <i>COMP</i>         | -3.15±0.285  | -3.356±0.475 | 4.64E-03 |
| cg10573763 | 19 | 19030094 | GeneBody/1st exon         | <i>COPE</i>         | -5.171±0.468 | -5.656±0.637 | 3.12E-05 |
| cg25234963 | 19 | 19143846 | GeneBody/5'UTR/1st intron | <i>SUGP2</i>        | -4.275±0.315 | -4.689±0.431 | 6.33E-07 |
| cg08393006 | 19 | 19144964 | GeneBody/5'UTR/1st intron | <i>ARMC6</i>        | -3.75±0.454  | -4.138±0.551 | 2.63E-04 |
| cg20426860 | 19 | 19248839 | GeneBody/1st intron       | <i>TMEM161A</i>     | -1.718±0.439 | -1.167±0.702 | 3.25E-06 |
| cg09421020 | 19 | 19303389 | GeneBody/5'UTR/1st exon   | <i>MEF2BNB</i>      | -3.406±0.557 | -3.713±0.478 | 8.97E-03 |
| cg13118849 | 19 | 19327542 | GeneBody/5'UTR/1st intron | <i>NCAN</i>         | 2.529±0.198  | 2.661±0.221  | 2.85E-03 |
| cg07919162 | 19 | 19431259 | GeneBody/1st intron       | <i>SUGP1</i>        | -4.621±0.441 | -4.956±0.39  | 5.34E-04 |
| cg03854071 | 19 | 19626428 | GeneBody/5'UTR/1st exon   | <i>TSSK6</i>        | 3.965±0.357  | 4.186±0.386  | 5.25E-03 |
| cg14773282 | 19 | 19754574 | TSS200                    | <i>GMIP</i>         | -5.163±0.536 | -5.765±0.544 | 3.36E-06 |
| cg13714039 | 19 | 19843912 | GeneBody/5'UTR/1st exon   | <i>ZNF14</i>        | -5.312±0.442 | -5.711±0.613 | 2.14E-04 |
| cg19282452 | 19 | 19855831 | 0                         | 0                   | 1.171±0.176  | 1.037±0.263  | 1.91E-03 |
| cg15690721 | 19 | 21106016 | TSS200                    | <i>ZNF85</i>        | -4.107±0.445 | -4.403±0.47  | 2.74E-03 |
| cg23736819 | 19 | 21579846 | TSS200                    | <i>ZNF493</i>       | -3.356±0.362 | -3.619±0.508 | 2.40E-03 |
| cg21029904 | 19 | 23577714 | GeneBody/1st intron       | <i>ZNF91</i>        | -4.53±0.49   | -5.04±0.485  | 1.02E-05 |
| cg11262874 | 19 | 23941711 | TSS200                    | <i>ZNF681</i>       | -1.117±0.142 | -1.206±0.15  | 4.61E-03 |
| cg00815440 | 19 | 29704028 | GeneBody/5'UTR/1st exon   | <i>UQCRCF1</i>      | -6.626±0.619 | -7.123±0.657 | 3.93E-04 |
| cg22041658 | 19 | 30097344 | GeneBody/1st exon         | <i>POP4</i>         | -5.108±0.529 | -5.406±0.519 | 9.08E-03 |
| cg20643362 | 19 | 30206369 | GeneBody/5'UTR/1st exon   | <i>C19orf12</i>     | -5.903±0.645 | -6.337±0.584 | 1.83E-03 |
| cg22892237 | 19 | 32895911 | GeneBody/1st exon         | <i>LOC400684</i>    | -4.277±0.337 | -4.597±0.446 | 8.96E-05 |
| cg11416386 | 19 | 32897202 | GeneBody/5'UTR/1st exon   | <i>DPY19L3</i>      | -5.104±0.456 | -5.393±0.475 | 3.99E-03 |
| cg20149493 | 19 | 33071876 | TSS1500                   | <i>PDCD5</i>        | -4.844±0.293 | -5.06±0.352  | 1.37E-03 |
| cg16174234 | 19 | 33463305 | GeneBody/5'UTR/1st intron | <i>C19orf40</i>     | -4.382±0.408 | -4.719±0.541 | 5.44E-04 |
| cg01033160 | 19 | 33865273 | TSS200                    | <i>CEBPG</i>        | -4.49±0.262  | -4.714±0.311 | 2.44E-04 |
| cg09411366 | 19 | 34012057 | GeneBody/1st intron       | <i>PEPD</i>         | -1.382±0.115 | -1.524±0.225 | 2.05E-05 |
| cg06546607 | 19 | 34013019 | TSS1500                   | <i>PEPD</i>         | -3.987±0.416 | -3.71±0.489  | 3.25E-03 |
| cg26149738 | 19 | 34287125 | TSS1500                   | <i>KCTD15</i>       | -2.903±0.393 | -3.283±0.43  | 3.95E-05 |
| cg13846796 | 19 | 34663000 | TSS1500                   | <i>LSM14A</i>       | -5.113±0.483 | -5.584±0.605 | 5.29E-05 |
| cg10452522 | 19 | 34663544 | GeneBody/5'UTR/1st exon   | <i>LSM14A</i>       | -4.519±0.404 | -4.757±0.398 | 6.68E-03 |
| cg10087081 | 19 | 34789667 | GeneBody/5'UTR/1st intron | <i>KIAA0355</i>     | 0.748±0.212  | 0.602±0.328  | 5.59E-03 |
| cg03212129 | 19 | 34895470 | GeneBody/1st intron       | <i>PDCD2L</i>       | -4.714±0.367 | -5.026±0.6   | 9.07E-04 |
| cg22096513 | 19 | 34919002 | TSS1500                   | <i>UBA2</i>         | -4.018±0.356 | -4.251±0.418 | 3.99E-03 |
| cg02017041 | 19 | 35521054 | TSS1500                   | <i>SCN1B</i>        | -2.946±0.229 | -3.176±0.35  | 8.03E-05 |
| cg27461196 | 19 | 35630106 | GeneBody/5'UTR/1st exon   | <i>FXDY1</i>        | 0.354±0.214  | 0.498±0.172  | 1.57E-03 |
| cg11840540 | 19 | 35644996 | TSS1500                   | <i>FXDY5</i>        | -4.655±0.398 | -4.991±0.506 | 3.67E-04 |
| cg15185001 | 19 | 35739448 | TSS200                    | <i>LSR</i>          | -4.492±0.295 | -4.693±0.361 | 2.89E-03 |
| cg02915261 | 19 | 35739762 | GeneBody/5'UTR/1st exon   | <i>LSR</i>          | -4.845±0.374 | -5.303±0.487 | 1.73E-06 |
| cg09404256 | 19 | 35759233 | TSS1500                   | <i>USF2</i>         | -3.773±0.483 | -4.181±0.623 | 3.79E-04 |
| cg19279529 | 19 | 35760554 | GeneBody                  | <i>USF2</i>         | -5.174±0.387 | -5.408±0.348 | 4.57E-03 |
| cg03782727 | 19 | 35842586 | GeneBody/1st exon         | <i>FFAR1</i>        | 2.855±0.272  | 3.064±0.363  | 1.24E-03 |
| cg05241571 | 19 | 35981224 | GeneBody/1st intron       | <i>KRTDAP</i>       | 2.447±0.292  | 2.634±0.375  | 5.80E-03 |
| cg10133777 | 19 | 36005906 | TSS1500                   | <i>DMKN</i>         | 0.254±0.286  | -0.001±0.348 | 1.54E-04 |
| cg19016517 | 19 | 36036881 | GeneBody/1st exon         | <i>LOC100506469</i> | -3.937±0.292 | -4.183±0.479 | 1.03E-03 |
| cg03560090 | 19 | 36119752 | TSS1500                   | <i>RBM42</i>        | -5.162±0.326 | -5.456±0.312 | 7.37E-05 |
| cg12680071 | 19 | 36139062 | TSS200                    | <i>COX6B1</i>       | -4.302±0.401 | -4.68±0.47   | 6.58E-05 |
| cg22769406 | 19 | 36139594 | GeneBody/5'UTR/1st intron | <i>COX6B1</i>       | -4.644±0.49  | -5.264±0.543 | 6.19E-07 |
| cg24471867 | 19 | 36207871 | TSS1500                   | <i>KMT2B</i>        | -4.585±0.555 | -4.934±0.5   | 3.38E-03 |
| cg03064400 | 19 | 36235836 | GeneBody                  | <i>U2AF1L4</i>      | -4.286±0.492 | -4.629±0.579 | 2.17E-03 |
| cg04558861 | 19 | 36239412 | GeneBody/5'UTR/1st exon   | <i>LIN37</i>        | -5.158±0.388 | -5.443±0.388 | 9.37E-04 |
| cg23230018 | 19 | 36239588 | GeneBody/5'UTR/1st exon   | <i>LIN37</i>        | -3.762±0.424 | -3.434±0.487 | 7.20E-04 |
| cg02956481 | 19 | 36249454 | GeneBody/1st intron       | <i>C19orf55</i>     | -5.18±0.462  | -5.498±0.446 | 1.65E-03 |
| cg22339278 | 19 | 36347276 | TSS1500                   | <i>KIRREL2</i>      | -3.486±0.238 | -3.72±0.41   | 2.09E-04 |
| cg09479015 | 19 | 36347919 | GeneBody/5'UTR/1st exon   | <i>KIRREL2</i>      | -3.717±0.292 | -3.955±0.517 | 2.07E-03 |
| cg18542098 | 19 | 36499326 | GeneBody/1st intron       | <i>SYNE4</i>        | 0.834±0.162  | 1.004±0.255  | 5.12E-05 |
| cg22501393 | 19 | 36505311 | TSS200                    | <i>ALKBH6</i>       | -3.973±0.218 | -4.137±0.31  | 1.84E-03 |
| cg26681081 | 19 | 36606109 | GeneBody/5'UTR/1st exon   | <i>POLR21</i>       | -5.066±0.397 | -5.381±0.372 | 3.59E-04 |
| cg09056317 | 19 | 36607008 | TSS1500                   | <i>POLR21</i>       | -1.507±0.2   | -1.672±0.288 | 7.39E-04 |
| cg11748006 | 19 | 36630557 | TSS1500                   | <i>CAPNS1</i>       | -4.108±0.219 | -4.253±0.246 | 3.20E-03 |
| cg25886284 | 19 | 36909418 | GeneBody/5'UTR/1st exon   | <i>ZFP82</i>        | -4.998±0.592 | -5.324±0.544 | 1.00E-02 |
| cg13073894 | 19 | 36980750 | GeneBody/1st exon         | <i>LOC728752</i>    | -4.831±0.312 | -5.029±0.319 | 3.79E-03 |
| cg09984370 | 19 | 37178943 | TSS1500                   | <i>ZNF567</i>       | -3.751±0.289 | -4.05±0.389  | 2.86E-05 |
| cg14399656 | 19 | 37179536 | TSS1500                   | <i>ZNF567</i>       | 1.248±0.151  | 1.383±0.235  | 3.93E-04 |
| cg22379207 | 19 | 37329274 | GeneBody/5'UTR/1st exon   | <i>ZNF790</i>       | -4.746±0.425 | -5.119±0.464 | 1.42E-04 |
| cg27327588 | 19 | 37341052 | GeneBody/5'UTR/1st exon   | <i>ZNF790</i>       | -4.819±0.381 | -5.085±0.4   | 1.67E-03 |
| cg03391040 | 19 | 37569273 | TSS200                    | <i>ZNF420</i>       | -5.675±0.328 | -5.883±0.465 | 7.88E-03 |
| cg06583518 | 19 | 38085456 | GeneBody/5'UTR/1st intron | <i>ZNF571</i>       | -4.137±0.383 | -4.402±0.555 | 4.13E-03 |
| cg17333479 | 19 | 38086035 | GeneBody/5'UTR/1st intron | <i>ZNF540</i>       | -4.871±0.528 | -5.193±0.58  | 6.13E-03 |
| cg25875213 | 19 | 38183055 | GeneBody/5'UTR/1st exon   | <i>ZNF781</i>       | -4.622±0.68  | -5.072±0.729 | 2.91E-03 |
| cg04215480 | 19 | 38270199 | GeneBody/5'UTR/1st exon   | <i>ZNF573</i>       | -4.465±0.243 | -4.631±0.266 | 2.22E-03 |
| cg27400772 | 19 | 38715064 | TSS200                    | <i>DPF1</i>         | -2.169±0.498 | -2.51±0.636  | 3.12E-03 |
| cg18996334 | 19 | 38826282 | TSS200                    | <i>CATSPERG</i>     | -4.49±0.45   | -5.038±0.59  | 1.89E-06 |
| cg05294095 | 19 | 38865080 | TSS200                    | <i>PSMD8</i>        | -5.717±0.541 | -6.209±0.594 | 9.06E-05 |
| cg26853640 | 19 | 38879673 | TSS1500                   | <i>GGN</i>          | -4.165±0.329 | -4.383±0.458 | 5.28E-03 |
| cg15679651 | 19 | 39108529 | GeneBody/1st exon         | <i>MAP4K1</i>       | -0.62±0.261  | -0.809±0.362 | 2.41E-03 |
| cg14631703 | 19 | 39110062 | GeneBody/1st intron       | <i>EIF3K</i>        | -3.586±0.352 | -3.802±0.321 | 4.09E-03 |
| cg15377649 | 19 | 39138400 | GeneBody/1st exon         | <i>ACTN4</i>        | -4.521±0.576 | -4.877±0.635 | 5.52E-03 |
| cg03793778 | 19 | 39264720 | TSS1500                   | <i>LGALS7</i>       | 0.792±0.225  | 0.627±0.24   | 1.08E-03 |
| cg02581667 | 19 | 39322242 | GeneBody/1st intron       | <i>ECH1</i>         | -4.66±0.383  | -5.059±0.639 | 7.73E-05 |
| cg24069559 | 19 | 39342390 | GeneBody/5'UTR/1st intron | <i>HNRNPL</i>       | -4.508±0.299 | -4.726±0.312 | 1.06E-03 |
| cg11396509 | 19 | 39389915 | TSS1500                   | <i>NFKBIB</i>       | -5.257±0.568 | -5.623±0.559 | 3.11E-03 |
| cg22814247 | 19 | 39390451 | GeneBody/5'UTR/1st exon   | <i>SIRT2</i>        | -5.073±0.564 | -5.5±0.58    | 7.15E-04 |
| cg21989094 | 19 | 39421295 | TSS200                    | <i>MRPS12</i>       | -5.352±0.346 | -5.581±0.506 | 6.33E-03 |

|            |    |          |                           |          |              |              |          |
|------------|----|----------|---------------------------|----------|--------------|--------------|----------|
| cg08914916 | 19 | 39421419 | GeneBody/5'UTR/1st exon   | MRPS12   | -5.912±0.447 | -6.215±0.554 | 3.19E-03 |
| cg11270633 | 19 | 39736956 | TSS1500                   | IFNL3    | 0.511±0.22   | 0.345±0.292  | 1.44E-03 |
| cg11677722 | 19 | 39881393 | GeneBody/1st intron       | PAF1     | -4.783±0.411 | -5.168±0.608 | 1.83E-04 |
| cg03774732 | 19 | 39882194 | GeneBody/1st exon         | MED29    | -5.65±0.481  | -6.05±0.487  | 2.34E-04 |
| cg19853229 | 19 | 39903895 | GeneBody/5'UTR/1st exon   | PLEKHG2  | -4.813±0.339 | -5.128±0.297 | 4.33E-05 |
| cg17367215 | 19 | 39936620 | GeneBody/1st intron       | SUPT5H   | -3.765±0.622 | -4.162±0.654 | 3.77E-03 |
| cg03139057 | 19 | 39989234 | TSS1500                   | DLL3     | -3.81±0.378  | -4.087±0.388 | 1.02E-03 |
| cg07053469 | 19 | 40023281 | GeneBody/1st exon         | EID2B    | -5.188±0.559 | -5.572±0.448 | 1.26E-03 |
| cg25543604 | 19 | 40023503 | TSS200                    | EID2B    | -5.719±0.467 | -6.016±0.494 | 3.98E-03 |
| cg04137116 | 19 | 40030727 | GeneBody/5'UTR/1st exon   | EID2     | -4.806±0.357 | -5.14±0.447  | 9.47E-05 |
| cg26255848 | 19 | 40336482 | GeneBody/1st intron       | FBL      | -2.358±0.488 | -2.661±0.487 | 4.53E-03 |
| cg17389295 | 19 | 40337230 | TSS200                    | FBL      | -4.61±0.503  | -4.941±0.529 | 2.97E-03 |
| cg24030627 | 19 | 40440416 | GeneBody/1st intron       | FCGBP    | 2.492±0.262  | 2.707±0.364  | 6.81E-04 |
| cg09114441 | 19 | 40502678 | TSS1500                   | ZNF546   | -5.286±0.422 | -5.536±0.373 | 5.29E-03 |
| cg14074431 | 19 | 40697804 | GeneBody/5'UTR/1st exon   | MAP3K10  | -4.98±0.451  | -5.292±0.415 | 1.41E-03 |
| cg27383956 | 19 | 40732902 | TSS1500                   | CNTD2    | 0.922±0.193  | 1.115±0.247  | 4.04E-05 |
| cg00043080 | 19 | 40853155 | GeneBody/5'UTR/1st intron | C19orf47 | 2.337±0.231  | 2.521±0.273  | 5.80E-04 |
| cg17072268 | 19 | 40853164 | GeneBody/5'UTR/1st intron | C19orf47 | 1.23±0.387   | 1.005±0.442  | 9.68E-03 |
| cg12748926 | 19 | 40854020 | GeneBody/1st intron       | C19orf47 | -4.983±0.408 | -5.42±0.585  | 2.34E-05 |
| cg07123548 | 19 | 40896163 | TSS200                    | HIPK4    | 1.729±0.241  | 1.897±0.294  | 2.33E-03 |
| cg24623694 | 19 | 40919760 | TSS1500                   | PRX      | -1.392±0.239 | -1.58±0.375  | 1.75E-03 |
| cg22905968 | 19 | 40931262 | GeneBody/5'UTR/1st intron | SERTAD1  | -3.725±0.414 | -4.227±0.518 | 1.78E-06 |
| cg21900416 | 19 | 40950172 | GeneBody/5'UTR/1st exon   | SERTAD3  | -5.526±0.556 | -5.874±0.65  | 5.57E-03 |
| cg01881255 | 19 | 40950703 | TSS1500                   | SERTAD3  | -6.138±0.635 | -6.658±0.624 | 2.64E-04 |
| cg19685976 | 19 | 40972228 | TSS1500                   | BLVRB    | -4.193±0.361 | -4.474±0.53  | 1.46E-03 |
| cg09650985 | 19 | 41082689 | TSS200                    | SHKBP1   | -5.399±0.413 | -5.662±0.394 | 3.21E-03 |
| cg25723866 | 19 | 41099080 | GeneBody/1st exon         | LTBP4    | 2.808±0.209  | 2.947±0.266  | 4.02E-03 |
| cg22499964 | 19 | 41304369 | TSS1500                   | EGLN2    | -4.405±0.463 | -4.802±0.535 | 2.26E-04 |
| cg22671726 | 19 | 41305423 | GeneBody/5'UTR/1st exon   | EGLN2    | -5.208±0.391 | -5.482±0.49  | 2.43E-03 |
| cg23652526 | 19 | 41768502 | GeneBody/5'UTR/1st intron | HNRNPUL1 | -4.354±0.445 | -4.631±0.354 | 3.09E-03 |
| cg20301340 | 19 | 41815941 | TSS200                    | CCDC97   | -5.018±0.365 | -5.295±0.483 | 1.32E-03 |
| cg01107031 | 19 | 41859159 | GeneBody/5'UTR/1st exon   | TGFB1    | -4.257±0.622 | -4.685±0.611 | 1.70E-03 |
| cg12920798 | 19 | 41870331 | TSS1500                   | B9D2     | -4.433±0.512 | -4.824±0.585 | 8.37E-04 |
| cg23325932 | 19 | 41903010 | GeneBody/1st intron       | EXOSC5   | -2.945±0.498 | -3.25±0.614  | 7.48E-03 |
| cg01655341 | 19 | 41903697 | GeneBody/5'UTR/1st exon   | BCKDHA   | -3.226±0.409 | -3.471±0.507 | 8.86E-03 |
| cg19201019 | 19 | 41935185 | TSS1500                   | B3GNT8   | 2.049±0.201  | 1.923±0.293  | 9.20E-03 |
| cg10237469 | 19 | 42133409 | GeneBody/5'UTR/1st exon   | CEACAM4  | -1.094±0.224 | -1.278±0.277 | 4.71E-04 |
| cg15316334 | 19 | 42211252 | TSS1500                   | CEACAM5  | -1.784±0.344 | -1.983±0.353 | 7.96E-03 |
| cg26813458 | 19 | 42260485 | GeneBody/1st intron       | CEACAM6  | 2.108±0.203  | 2.309±0.329  | 1.41E-04 |
| cg03050522 | 19 | 42386962 | TSS1500                   | ARHGEF1  | -4.523±0.667 | -4.974±0.603 | 1.76E-03 |
| cg23920441 | 19 | 42497879 | TSS1500                   | ATP1A3   | -3.524±0.3   | -3.721±0.484 | 9.03E-03 |
| cg11719283 | 19 | 42574717 | 0                         | 0        | 1.492±0.152  | 1.642±0.231  | 1.03E-04 |
| cg03900542 | 19 | 42721460 | GeneBody/5'UTR/1st intron | DEDD2    | -4.465±0.516 | -4.757±0.526 | 9.28E-03 |
| cg26897054 | 19 | 42721870 | GeneBody/1st exon         | DEDD2    | -3.963±0.235 | -4.354±0.405 | 1.95E-08 |
| cg24405636 | 19 | 42724150 | GeneBody/5'UTR/1st intron | DEDD2    | -3.82±0.353  | -4.03±0.47   | 9.98E-03 |
| cg04497885 | 19 | 42747008 | TSS1500                   | GSK3A    | -5.287±0.38  | -5.598±0.495 | 5.73E-04 |
| cg18333807 | 19 | 42747018 | TSS1500                   | GSK3A    | -4.394±0.326 | -4.646±0.505 | 1.89E-03 |
| cg05217755 | 19 | 42758976 | GeneBody/1st intron       | ERF      | -5.265±0.546 | -5.62±0.453  | 2.21E-03 |
| cg02097636 | 19 | 42806344 | GeneBody/5'UTR/1st exon   | PRR19    | -5.658±0.554 | -6.217±0.536 | 1.53E-05 |
| cg19776453 | 19 | 43033801 | TSS1500                   | CEACAM1  | 1.655±0.27   | 1.841±0.268  | 1.67E-03 |
| cg06475327 | 19 | 43099482 | TSS1500                   | CEACAM8  | 3.761±0.211  | 3.903±0.237  | 2.69E-03 |
| cg16664233 | 19 | 44031589 | TSS200                    | ETHE1    | -4.653±0.444 | -4.985±0.571 | 1.40E-03 |
| cg01880404 | 19 | 44079527 | GeneBody/1st intron       | XRCC1    | -4.353±0.445 | -4.719±0.505 | 3.59E-04 |
| cg16648297 | 19 | 44100438 | TSS200                    | ZNF576   | -6.132±0.504 | -6.515±0.454 | 5.36E-04 |
| cg27309253 | 19 | 44488327 | GeneBody/5'UTR/1st exon   | ZNF155   | -5.275±0.448 | -5.767±0.644 | 1.62E-05 |
| cg14298780 | 19 | 44506864 | TSS1500                   | ZNF230   | -5.383±0.478 | -5.777±0.482 | 2.60E-04 |
| cg09757277 | 19 | 44529822 | GeneBody/1st intron       | ZNF222   | -3.04±0.515  | -3.608±0.617 | 7.08E-06 |
| cg16534499 | 19 | 44555960 | TSS1500                   | ZNF223   | -3.715±0.496 | -4.082±0.532 | 9.91E-04 |
| cg03486540 | 19 | 44598375 | TSS200                    | ZNF224   | -4.421±0.622 | -4.87±0.51   | 8.09E-04 |
| cg03747695 | 19 | 44716642 | TSS200                    | ZNF227   | -3.791±0.486 | -4.277±0.671 | 5.42E-05 |
| cg24443885 | 19 | 44716952 | GeneBody/5'UTR/1st intron | ZNF227   | -5.152±0.584 | -5.547±0.549 | 1.83E-03 |
| cg26918645 | 19 | 44905882 | TSS200                    | ZNF285   | -3.755±0.356 | -4.055±0.453 | 1.87E-04 |
| cg15540054 | 19 | 45004280 | GeneBody/1st exon         | ZNF180   | -4.488±0.581 | -4.933±0.804 | 1.41E-03 |
| cg10488637 | 19 | 45004845 | TSS1500                   | ZNF180   | -4.519±0.327 | -4.793±0.477 | 6.52E-04 |
| cg16094954 | 19 | 45251180 | TSS1500                   | BCL3     | -3.959±0.716 | -4.418±0.6   | 2.60E-03 |
| cg21263196 | 19 | 45311997 | TSS1500                   | BCAM     | -4.316±0.461 | -4.775±0.621 | 5.25E-05 |
| cg02863842 | 19 | 45349685 | GeneBody/5'UTR/1st exon   | PVRL2    | -4.82±0.41   | -5.11±0.538  | 2.57E-03 |
| cg21549639 | 19 | 45394156 | TSS1500                   | TOMM40   | -4.462±0.439 | -4.791±0.427 | 7.09E-04 |
| cg12266551 | 19 | 45394624 | GeneBody/5'UTR/1st exon   | TOMM40   | -5.168±0.567 | -5.577±0.611 | 1.29E-03 |
| cg08955609 | 19 | 45409353 | GeneBody/5'UTR/1st intron | APOE     | -4.006±0.226 | -4.167±0.389 | 5.99E-03 |
| cg11337525 | 19 | 45418417 | GeneBody                  | APOC1    | -4.53±0.476  | -4.967±0.477 | 6.36E-05 |
| cg05411032 | 19 | 45459158 | GeneBody/1st intron       | CLPTM1   | -4.779±0.377 | -5.024±0.481 | 5.05E-03 |
| cg19317638 | 19 | 45542562 | GeneBody/1st intron       | CLASRP   | -1.872±0.449 | -2.214±0.519 | 8.91E-04 |
| cg17697457 | 19 | 45582312 | TSS1500                   | GEMIN7   | -5.105±0.36  | -5.538±0.602 | 8.97E-06 |
| cg21631754 | 19 | 45737485 | TSS200                    | EXOC3L2  | 2.45±0.274   | 2.771±0.353  | 3.57E-06 |
| cg06245154 | 19 | 45873313 | GeneBody/1st intron       | ERCC2    | -3.576±0.319 | -3.807±0.406 | 1.86E-03 |
| cg04878842 | 19 | 45874111 | TSS1500                   | ERCC2    | -3.302±0.662 | -3.847±0.836 | 5.72E-04 |
| cg03900104 | 19 | 45909124 | TSS1500                   | CD3EAP   | -4.537±0.587 | -5.233±0.724 | 2.45E-06 |
| cg07816442 | 19 | 45909858 | TSS1500                   | PPP1R13L | -5.242±0.585 | -5.761±0.539 | 8.45E-05 |
| cg15911500 | 19 | 45927257 | TSS200                    | ERCC1    | -5.754±0.399 | -6.116±0.425 | 8.76E-05 |
| cg04845144 | 19 | 45999799 | GeneBody/1st intron       | RTN2     | -4.765±0.416 | -5.115±0.608 | 6.29E-04 |
| cg09607282 | 19 | 45999989 | GeneBody/1st intron       | RTN2     | -2.352±0.224 | -2.501±0.291 | 4.23E-03 |
| cg16688911 | 19 | 46010011 | TSS1500                   | VASP     | -5.258±0.421 | -5.577±0.547 | 1.29E-03 |
| cg11639397 | 19 | 46010716 | GeneBody/5'UTR/1st exon   | VASP     | -5.558±0.448 | -5.923±0.585 | 6.14E-04 |
| cg01990304 | 19 | 46088010 | GeneBody/1st exon         | OPA3     | -5.734±0.464 | -6.168±0.591 | 9.88E-05 |
| cg10103111 | 19 | 46088331 | TSS1500                   | OPA3     | -4.308±0.347 | -4.563±0.616 | 5.19E-03 |
| cg03096975 | 19 | 46142574 | GeneBody/1st intron       | EML2     | -5.359±0.553 | -5.77±0.571  | 8.68E-04 |
| cg25277950 | 19 | 46142914 | TSS1500                   | EML2     | -3.178±0.278 | -3.43±0.338  | 1.26E-04 |
| cg03879902 | 19 | 46171872 | GeneBody/5'UTR/1st intron | GIPR     | -3.74±0.358  | -4.093±0.387 | 2.85E-05 |
| cg04032871 | 19 | 46195965 | GeneBody/1st exon         | QPCTL    | -4.827±0.418 | -5.214±0.483 | 8.07E-05 |
| cg24254206 | 19 | 46196934 | GeneBody                  | QPCTL    | -1.51±0.217  | -1.679±0.342 | 1.98E-03 |
| cg11063988 | 19 | 46272660 | TSS200                    | SIX5     | -6.173±0.562 | -6.624±0.507 | 2.90E-04 |
| cg03039172 | 19 | 46273153 | TSS1500                   | SIX5     | -4.918±0.514 | -5.216±0.51  | 7.54E-03 |
| cg05477027 | 19 | 46295590 | GeneBody/1st exon         | DMWD     | -4.547±0.385 | -4.934±0.495 | 3.76E-05 |
| cg03877802 | 19 | 46849936 | TSS1500                   | PPP5C    | -5.066±0.537 | -5.378±0.512 | 7.06E-03 |

|            |    |          |                           |           |              |              |          |
|------------|----|----------|---------------------------|-----------|--------------|--------------|----------|
| cg14149007 | 19 | 47219555 | GeneBody                  | PRKD2     | -4.742±0.477 | -5.04±0.447  | 3.75E-03 |
| cg20313722 | 19 | 47248003 | TSS1500                   | FKRP      | 0.742±0.157  | 0.836±0.191  | 8.77E-03 |
| cg09543783 | 19 | 47248096 | TSS1500                   | FKRP      | 2.361±0.236  | 2.582±0.331  | 1.46E-04 |
| cg10302026 | 19 | 47249514 | GeneBody/1st exon         | STRN4     | -5.002±0.349 | -5.266±0.431 | 1.15E-03 |
| cg00782174 | 19 | 47291626 | GeneBody/5'UTR/1st exon   | SLC1A5    | -3.943±0.599 | -4.415±0.614 | 4.56E-04 |
| cg02303361 | 19 | 47354240 | TSS200                    | AP2S1     | -4.628±0.382 | -4.935±0.505 | 7.46E-04 |
| cg16788436 | 19 | 47421960 | GeneBody/1st exon         | ARHGAP35  | 3.427±0.235  | 3.71±0.302   | 2.11E-06 |
| cg26502594 | 19 | 47759476 | TSS1500                   | CCDC9     | -4.039±0.283 | -4.304±0.483 | 3.68E-04 |
| cg00960702 | 19 | 47759791 | GeneBody/5'UTR/1st exon   | CCDC9     | -4.96±0.462  | -5.267±0.505 | 2.87E-03 |
| cg02903525 | 19 | 47813489 | GeneBody/1st intron       | C5AR1     | 1.619±0.173  | 1.739±0.187  | 1.93E-03 |
| cg21145624 | 19 | 47922899 | TSS200                    | MEIS3     | -3.606±0.253 | -3.813±0.395 | 1.08E-03 |
| cg07478208 | 19 | 47923331 | TSS1500                   | MEIS3     | -2.14±0.162  | -2.289±0.272 | 4.12E-04 |
| cg22387994 | 19 | 48018200 | GeneBody/1st exon         | NAPA      | -4.637±0.365 | -4.869±0.4   | 4.26E-03 |
| cg13236854 | 19 | 48018668 | TSS200                    | NAPA      | -5.794±0.593 | -6.135±0.512 | 6.63E-03 |
| cg10906135 | 19 | 48181752 | GeneBody                  | GLTSCR1   | 2.352±0.364  | 2.574±0.451  | 7.76E-03 |
| cg19124998 | 19 | 48248730 | TSS200                    | GLTSCR2   | -4.228±0.385 | -4.607±0.592 | 1.12E-04 |
| cg03135598 | 19 | 48281610 | TSS1500                   | SEPW1     | -5.741±0.502 | -6.115±0.543 | 9.34E-04 |
| cg19762747 | 19 | 48325089 | TSS200                    | CRX       | -2.304±0.216 | -2.477±0.373 | 2.10E-03 |
| cg18534730 | 19 | 48547448 | TSS200                    | CABP5     | 1.201±0.236  | 1.346±0.299  | 7.70E-03 |
| cg09594841 | 19 | 48673392 | GeneBody/5'UTR/1st intron | LIG1      | -4.195±0.407 | -4.469±0.603 | 5.79E-03 |
| cg13668397 | 19 | 48673955 | TSS1500                   | LIG1      | -4.356±0.645 | -4.817±0.691 | 1.42E-03 |
| cg18119529 | 19 | 48775014 | GeneBody/5'UTR            | ZNF114    | -4.389±0.577 | -4.947±0.645 | 4.16E-05 |
| cg06730468 | 19 | 48867056 | GeneBody/1st intron       | TMEM143   | -3.156±0.19  | -3.307±0.293 | 1.44E-03 |
| cg18263177 | 19 | 48867205 | TSS200                    | TMEM143   | -4.64±0.379  | -4.967±0.545 | 4.49E-04 |
| cg18678185 | 19 | 48895030 | TSS1500                   | KDELR1    | -2.882±0.284 | -3.06±0.336  | 5.64E-03 |
| cg01493303 | 19 | 48949047 | GeneBody/5'UTR/1st exon   | GRWD1     | -4.972±0.663 | -5.539±0.663 | 1.60E-04 |
| cg20053799 | 19 | 48972338 | TSS200                    | CYTH2     | -5.158±0.324 | -5.423±0.341 | 3.14E-04 |
| cg02239082 | 19 | 48972844 | GeneBody/1st intron       | CYTH2     | -6.148±0.55  | -6.753±0.583 | 4.98E-06 |
| cg15149098 | 19 | 49055027 | TSS1500                   | SULT2B1   | 1.471±0.259  | 1.617±0.241  | 8.32E-03 |
| cg00754617 | 19 | 49109288 | TSS1500                   | SPACA4    | 0.64±0.239   | 0.473±0.268  | 1.97E-03 |
| cg18189063 | 19 | 49122916 | GeneBody/5'UTR/1st exon   | SPHK2     | -5.381±0.5   | -5.674±0.503 | 7.09E-03 |
| cg23441208 | 19 | 49314192 | TSS200                    | BCAT2     | -5.132±0.45  | -5.548±0.608 | 1.43E-04 |
| cg15974053 | 19 | 49339789 | GeneBody/5'UTR/1st exon   | HSD17B14  | -4.043±0.461 | -4.38±0.602  | 1.88E-03 |
| cg24946408 | 19 | 49375720 | GeneBody/5'UTR/1st exon   | PPP1R15A  | -5.348±0.491 | -5.728±0.507 | 5.71E-04 |
| cg00062776 | 19 | 49402424 | TSS1500                   | TULP2     | 4.938±0.312  | 5.148±0.414  | 4.28E-03 |
| cg14833160 | 19 | 49457855 | TSS1500                   | BAX       | -3.413±0.32  | -3.683±0.359 | 2.63E-04 |
| cg14640682 | 19 | 49496473 | GeneBody/1st exon         | GYS1      | -5.454±0.305 | -5.722±0.44  | 3.51E-04 |
| cg05951993 | 19 | 49496864 | TSS1500                   | GYS1      | -4.678±0.31  | -4.959±0.411 | 1.75E-04 |
| cg12566415 | 19 | 49519613 | GeneBody                  | LHB       | 2.748±0.218  | 2.919±0.256  | 6.66E-04 |
| cg20173259 | 19 | 49520930 | TSS1500                   | LHB       | -4.763±0.523 | -5.178±0.49  | 3.52E-04 |
| cg17164520 | 19 | 49540241 | TSS200                    | SNAR-G1   | 0.961±0.173  | 1.115±0.223  | 1.98E-04 |
| cg01377911 | 19 | 49568036 | TSS1500                   | NTF4      | -1.915±0.249 | -2.085±0.32  | 3.36E-03 |
| cg25485913 | 19 | 49568962 | 0                         | 0         | -1.377±0.169 | -1.511±0.275 | 1.96E-03 |
| cg00430945 | 19 | 49617309 | TSS1500                   | LIN7B     | -3.414±0.246 | -3.7±0.333   | 4.93E-06 |
| cg12412075 | 19 | 49618425 | GeneBody                  | LIN7B     | -4.29±0.35   | -4.578±0.484 | 6.56E-04 |
| cg17414431 | 19 | 49622715 | GeneBody/1st exon         | PPFIA3    | -4.24±0.642  | -4.665±0.599 | 2.21E-03 |
| cg10910525 | 19 | 49658232 | GeneBody/1st exon         | HRC       | 0.786±0.238  | 1.004±0.307  | 1.45E-04 |
| cg25261908 | 19 | 49660986 | TSS200                    | TRPM4     | -3.838±0.269 | -4.126±0.495 | 9.58E-05 |
| cg16539981 | 19 | 49865373 | GeneBody/5'UTR/1st intron | TEAD2     | -3.424±0.449 | -3.767±0.579 | 1.15E-03 |
| cg15299463 | 19 | 49865398 | GeneBody/5'UTR/1st intron | TEAD2     | -4.671±0.557 | -5.14±0.649  | 2.87E-04 |
| cg13278334 | 19 | 49954994 | GeneBody/5'UTR/1st exon   | PIH1D1    | -3.787±0.223 | -3.99±0.315  | 2.07E-04 |
| cg25658980 | 19 | 49955004 | GeneBody/5'UTR/1st exon   | PIH1D1    | -4.456±0.497 | -4.827±0.634 | 1.43E-03 |
| cg08261177 | 19 | 49956824 | GeneBody/1st intron       | ALDH16A1  | -4.824±0.434 | -5.123±0.505 | 2.36E-03 |
| cg01667384 | 19 | 49977266 | TSS200                    | FLT3LG    | -5.323±0.406 | -5.634±0.387 | 5.60E-04 |
| cg14364739 | 19 | 50083632 | GeneBody/5'UTR/1st intron | NOSIP     | -5.262±0.261 | -5.496±0.316 | 1.50E-04 |
| cg17383958 | 19 | 50143224 | GeneBody/1st exon         | RRAS      | -4.551±0.469 | -4.822±0.469 | 7.71E-03 |
| cg03312426 | 19 | 50143795 | TSS1500                   | RRAS      | -4.241±0.436 | -4.582±0.739 | 2.44E-03 |
| cg23029494 | 19 | 50167926 | TSS1500                   | BCL2L12   | -3.977±0.332 | -4.216±0.508 | 3.50E-03 |
| cg12107692 | 19 | 50168026 | TSS1500                   | BCL2L12   | -3.988±0.401 | -4.356±0.57  | 2.01E-04 |
| cg09712606 | 19 | 50169182 | TSS200                    | IRF3      | -4.71±0.323  | -5.089±0.458 | 5.32E-06 |
| cg14576628 | 19 | 50180360 | TSS200                    | PRMT1     | -4.25±0.481  | -4.597±0.678 | 2.63E-03 |
| cg25595446 | 19 | 50180579 | GeneBody/1st intron       | PRMT1     | -4.836±0.538 | -5.346±0.74  | 1.14E-04 |
| cg21604803 | 19 | 50194662 | GeneBody/5'UTR/1st intron | CPT1C     | -4.285±0.364 | -4.545±0.529 | 3.16E-03 |
| cg02784848 | 19 | 50316878 | TSS1500                   | FUZ       | -3.581±0.412 | -3.888±0.574 | 1.83E-03 |
| cg15398448 | 19 | 50353971 | TSS1500                   | PTOV1     | -5.5±0.431   | -5.989±0.562 | 6.12E-06 |
| cg08064891 | 19 | 50355254 | TSS1500                   | PTOV1-AS1 | -4.47±0.321  | -4.754±0.366 | 1.51E-04 |
| cg04314463 | 19 | 50370045 | GeneBody                  | PNKP      | -4.296±0.362 | -4.725±0.51  | 1.18E-06 |
| cg19073614 | 19 | 50380660 | TSS200                    | AKT1S1    | -4.918±0.426 | -5.187±0.466 | 4.51E-03 |
| cg09842540 | 19 | 50381045 | GeneBody/1st intron       | TBC1D17   | -5.438±0.538 | -5.819±0.582 | 1.56E-03 |
| cg11739626 | 19 | 50381908 | TSS1500                   | AKT1S1    | 1.565±0.185  | 1.694±0.221  | 2.40E-03 |
| cg17177829 | 19 | 50432927 | GeneBody/5'UTR/1st exon   | NUP62     | -4.705±0.319 | -5.077±0.515 | 1.14E-05 |
| cg00336605 | 19 | 50879437 | TSS1500                   | NR1H2     | -3.858±0.41  | -4.222±0.565 | 2.73E-04 |
| cg19063397 | 19 | 50887127 | TSS1500                   | POLD1     | -2.935±0.387 | -3.19±0.41   | 2.94E-03 |
| cg16923271 | 19 | 50887763 | GeneBody/5'UTR/1st intron | POLD1     | -3.884±0.601 | -4.238±0.594 | 6.70E-03 |
| cg15560112 | 19 | 50935305 | TSS1500                   | MYBPC2    | -4.811±0.467 | -5.356±0.483 | 1.89E-06 |
| cg07775501 | 19 | 51014757 | TSS200                    | JOSD2     | -5.32±0.419  | -5.555±0.37  | 8.01E-03 |
| cg20308817 | 19 | 51225848 | TSS1500                   | CLEC11A   | 0.541±0.251  | 0.739±0.303  | 6.91E-04 |
| cg09123444 | 19 | 51307950 | GeneBody/5'UTR/1st exon   | C19orf48  | -4.897±0.314 | -5.313±0.484 | 9.74E-07 |
| cg26149550 | 19 | 51334496 | GeneBody/1st intron       | KLK15     | 1.547±0.266  | 1.381±0.287  | 5.05E-03 |
| cg17687962 | 19 | 51358244 | GeneBody/1st exon         | KLK3      | 0.515±0.154  | 0.634±0.225  | 1.62E-03 |
| cg04349727 | 19 | 51457389 | TSS1500                   | KLK5      | 0.811±0.244  | 0.64±0.334   | 3.17E-03 |
| cg09226684 | 19 | 51520093 | GeneBody                  | KLK10     | -2.072±0.23  | -2.244±0.296 | 1.43E-03 |
| cg21869055 | 19 | 51522454 | GeneBody/5'UTR/1st intron | KLK10     | -4.7±0.53    | -5.05±0.617  | 3.55E-03 |
| cg06130787 | 19 | 51523550 | TSS200                    | KLK10     | -2.175±0.365 | -2.391±0.41  | 7.89E-03 |
| cg19356189 | 19 | 51524690 | TSS1500                   | KLK10     | -1±0.192     | -1.127±0.265 | 5.52E-03 |
| cg15792367 | 19 | 51531484 | TSS200                    | KLK11     | 0.402±0.179  | 0.231±0.312  | 3.32E-04 |
| cg24815853 | 19 | 51538416 | TSS1500                   | KLK12     | -1.129±0.207 | -1.287±0.35  | 3.00E-03 |
| cg26524263 | 19 | 51568336 | GeneBody/5'UTR/1st exon   | KLK13     | -3.929±0.327 | -4.195±0.509 | 1.15E-03 |
| cg12683641 | 19 | 51587102 | GeneBody/5'UTR/1st intron | KLK14     | 2.942±0.459  | 2.679±0.432  | 7.50E-03 |
| cg13407883 | 19 | 51627843 | TSS1500                   | SIGLEC9   | 1.542±0.169  | 1.725±0.275  | 3.97E-05 |
| cg04322978 | 19 | 51869401 | GeneBody/1st intron       | ETFB      | -4.569±0.396 | -5.128±0.495 | 1.14E-07 |
| cg12916723 | 19 | 51876788 | TSS1500                   | NGF7      | 1.203±0.173  | 1.346±0.242  | 6.70E-04 |
| cg18986165 | 19 | 52005990 | TSS1500                   | SIGLEC12  | 3.217±0.272  | 3.4±0.362    | 4.20E-03 |
| cg17592734 | 19 | 52074501 | TSS200                    | ZNF175    | -4.833±0.346 | -5.071±0.434 | 2.99E-03 |
| cg01369850 | 19 | 52074588 | GeneBody/5'UTR/1st exon   | ZNF175    | -2.781±0.538 | -3.255±0.661 | 2.00E-04 |

|            |    |          |                           |               |              |              |          |
|------------|----|----------|---------------------------|---------------|--------------|--------------|----------|
| cg01930621 | 19 | 52408350 | TSS200                    | ZNF649        | -4.175±0.506 | -4.563±0.462 | 4.96E-04 |
| cg06491924 | 19 | 52430334 | TSS1500                   | ZNF613        | -4.791±0.482 | -5.23±0.64   | 1.66E-04 |
| cg14066280 | 19 | 52430533 | TSS200                    | ZNF613        | -5.176±0.437 | -5.519±0.38  | 3.41E-04 |
| cg25835225 | 19 | 52490199 | TSS200                    | ZNF350        | -4.703±0.369 | -4.936±0.371 | 3.91E-03 |
| cg15979098 | 19 | 52511370 | GeneBody/5'UTR/1st intron | ZNF615        | -4.85±0.531  | -5.181±0.48  | 3.73E-03 |
| cg03293882 | 19 | 52531438 | GeneBody/5'UTR/1st intron | ZNF614        | -3.767±0.528 | -4.133±0.584 | 2.01E-03 |
| cg25776555 | 19 | 52531777 | TSS200                    | ZNF614        | -4.165±0.47  | -4.485±0.479 | 1.99E-03 |
| cg13540795 | 19 | 52551618 | GeneBody/5'UTR/1st intron | ZNF432        | -4.234±0.359 | -4.557±0.559 | 3.81E-04 |
| cg02729352 | 19 | 52552443 | TSS1500                   | ZNF432        | -4.932±0.397 | -5.201±0.554 | 4.54E-03 |
| cg11957040 | 19 | 52693370 | GeneBody/1st exon         | PPP2R1A       | -4.861±0.403 | -5.16±0.613  | 2.65E-03 |
| cg27480700 | 19 | 52800524 | GeneBody/5'UTR/1st intron | ZNF480        | -4.858±0.642 | -5.333±0.62  | 8.07E-04 |
| cg17132967 | 19 | 53142304 | TSS1500                   | ZNF83         | -1.313±0.385 | -1.55±0.417  | 5.41E-03 |
| cg07559730 | 19 | 53497048 | TSS1500                   | ZNF702P       | -3.964±0.275 | -4.251±0.433 | 5.47E-05 |
| cg03712038 | 19 | 53607021 | TSS1500                   | ZNF160        | -5.546±0.605 | -6.109±0.514 | 3.99E-05 |
| cg06815666 | 19 | 54618544 | TSS1500                   | PRPF31        | -3.098±0.563 | -3.55±0.618  | 4.40E-04 |
| cg13650689 | 19 | 54618596 | TSS200                    | PRPF31        | -5.859±0.44  | -6.217±0.373 | 2.27E-04 |
| cg19822214 | 19 | 54641139 | TSS1500                   | CNOT3         | -4.074±0.47  | -4.456±0.528 | 4.01E-04 |
| cg21700070 | 19 | 54641527 | GeneBody/5'UTR/1st exon   | CNOT3         | -5.284±0.551 | -5.66±0.634  | 2.55E-03 |
| cg08504905 | 19 | 54663436 | GeneBody/5'UTR/1st exon   | LENG1         | -5.136±0.353 | -5.39±0.454  | 2.07E-03 |
| cg16490390 | 19 | 54694229 | GeneBody/5'UTR/1st exon   | TSEN34        | -4.526±0.648 | -4.924±0.618 | 4.48E-03 |
| cg00705255 | 19 | 54804613 | TSS1500                   | LILRA3        | -0.991±0.278 | -1.167±0.303 | 4.39E-03 |
| cg20320468 | 19 | 54877619 | TSS1500                   | LAIR1         | 2.058±0.264  | 2.216±0.318  | 8.53E-03 |
| cg18678421 | 19 | 54959428 | TSS1500                   | LENG8         | -3.71±0.505  | -4.092±0.455 | 5.56E-04 |
| cg11237817 | 19 | 55235762 | TSS1500                   | KIR3DL3       | 1.123±0.218  | 1.322±0.229  | 7.88E-05 |
| cg23404467 | 19 | 55235973 | TSS200                    | KIR3DL3       | 2.514±0.293  | 2.678±0.252  | 7.94E-03 |
| cg18221897 | 19 | 55282146 | GeneBody/1st intron       | KIR2DL1       | 1.461±0.203  | 1.639±0.255  | 2.28E-04 |
| cg18059223 | 19 | 55478588 | GeneBody/5'UTR/1st intron | NLRP2         | 1.537±0.317  | 1.35±0.38    | 9.39E-03 |
| cg02207610 | 19 | 55628570 | GeneBody/1st intron       | PPP1R12C      | -3.735±0.356 | -4.04±0.482  | 3.87E-04 |
| cg26456957 | 19 | 55629363 | TSS1500                   | PPP1R12C      | -4.478±0.463 | -4.829±0.407 | 5.25E-04 |
| cg24946544 | 19 | 55678059 | GeneBody/5'UTR/1st exon   | DNAAF3        | -4.203±0.347 | -4.407±0.347 | 6.78E-03 |
| cg10080004 | 19 | 55691827 | TSS200                    | SYT5          | -3.007±0.31  | -3.254±0.444 | 1.06E-03 |
| cg26457013 | 19 | 55740188 | GeneBody/5'UTR/1st exon   | TMEM86B       | 1.921±0.236  | 2.211±0.334  | 2.38E-06 |
| cg04960951 | 19 | 55851040 | TSS200                    | SUV420H2      | -4.85±0.471  | -5.192±0.614 | 1.96E-03 |
| cg16481281 | 19 | 55880843 | GeneBody/5'UTR/1st intron | IL11          | -4.869±0.346 | -5.22±0.509  | 5.93E-05 |
| cg17387916 | 19 | 55896965 | TSS1500                   | RPL28         | -4.811±0.471 | -5.16±0.582  | 1.37E-03 |
| cg00035623 | 19 | 55919836 | TSS1500                   | UBE2S         | -3.102±0.256 | -3.271±0.275 | 3.04E-03 |
| cg13336167 | 19 | 56092141 | GeneBody/5'UTR/1st intron | ZNF579        | -5.039±0.544 | -5.491±0.483 | 1.83E-04 |
| cg11951066 | 19 | 56109941 | GeneBody/5'UTR/1st intron | FIZ1          | 3.036±0.456  | 3.414±0.486  | 2.71E-04 |
| cg26770281 | 19 | 56109975 | GeneBody/5'UTR/1st intron | FIZ1          | 3.183±0.218  | 3.34±0.257   | 1.62E-03 |
| cg13741249 | 19 | 56112088 | GeneBody/5'UTR/1st intron | ZNF524        | -4.696±0.244 | -4.965±0.391 | 2.78E-05 |
| cg12531003 | 19 | 56152621 | GeneBody/5'UTR/1st intron | ZNF580        | -4.789±0.541 | -5.264±0.569 | 1.31E-04 |
| cg08568987 | 19 | 56165234 | TSS200                    | U2AF2         | -4.585±0.34  | -4.855±0.455 | 8.71E-04 |
| cg14930706 | 19 | 56363105 | GeneBody/5'UTR/1st intron | NLRP4         | 2.812±0.163  | 2.934±0.158  | 7.00E-04 |
| cg18473162 | 19 | 56631888 | GeneBody/5'UTR/1st intron | ZNF787        | -5.217±0.34  | -5.511±0.493 | 4.47E-04 |
| cg11399891 | 19 | 56652352 | TSS200                    | ZNF444        | -3.986±0.173 | -4.097±0.204 | 4.50E-03 |
| cg26309134 | 19 | 56879571 | GeneBody/1st exon         | ZNF542        | -4.349±0.359 | -4.72±0.57   | 6.80E-05 |
| cg04783231 | 19 | 57050834 | GeneBody/1st intron       | ZFP28         | -2.266±0.328 | -2.051±0.382 | 3.75E-03 |
| cg15705469 | 19 | 57106714 | GeneBody/5'UTR/1st exon   | ZNF71         | -4.894±0.564 | -5.367±0.635 | 2.73E-04 |
| cg01656470 | 19 | 57350096 | GeneBody/5'UTR/1st intron | PEG3          | 1.217±0.197  | 1.388±0.292  | 4.89E-04 |
| cg19098268 | 19 | 57352269 | GeneBody/1st exon         | MIMT1         | 1.083±0.132  | 1.256±0.211  | 1.63E-06 |
| cg08504049 | 19 | 57702917 | GeneBody/5'UTR/1st exon   | ZNF264        | -3.155±0.184 | -3.31±0.299  | 1.02E-03 |
| cg22307908 | 19 | 57702927 | GeneBody/5'UTR/1st exon   | ZNF264        | -5.18±0.516  | -5.487±0.561 | 7.15E-03 |
| cg11140785 | 19 | 57703301 | GeneBody/1st exon         | ZNF264        | -5.032±0.494 | -5.404±0.629 | 1.32E-03 |
| cg25549230 | 19 | 57791887 | GeneBody/5'UTR/1st exon   | ZNF460        | -5.405±0.437 | -5.993±0.655 | 6.53E-07 |
| cg16518291 | 19 | 57792257 | GeneBody/1st intron       | ZNF460        | -4.838±0.29  | -5.083±0.554 | 2.05E-03 |
| cg17849956 | 19 | 57862480 | TSS200                    | ZNF304        | -5.305±0.47  | -5.609±0.464 | 3.06E-03 |
| cg07494047 | 19 | 57862713 | GeneBody/5'UTR/1st exon   | ZNF304        | -5.691±0.502 | -6.04±0.44   | 1.29E-03 |
| cg16276070 | 19 | 58070951 | GeneBody/1st intron       | ZNF550        | -5.146±0.444 | -5.568±0.577 | 8.55E-05 |
| cg21612046 | 19 | 58071269 | TSS200                    | ZNF550        | -5.333±0.604 | -5.622±0.506 | 5.00E-03 |
| cg01947224 | 19 | 58089885 | GeneBody/1st intron       | ZNF416        | -4.099±0.305 | -4.308±0.344 | 2.35E-03 |
| cg17615007 | 19 | 58125489 | TSS1500                   | ZNF134        | -4.571±0.26  | -4.908±0.371 | 9.62E-07 |
| cg27143938 | 19 | 58144466 | TSS200                    | ZNF211        | -4.475±0.236 | -4.657±0.271 | 7.76E-04 |
| cg05908775 | 19 | 58144687 | GeneBody/1st exon         | ZNF211        | -5.051±0.453 | -5.484±0.486 | 4.34E-05 |
| cg01644850 | 19 | 58193231 | TSS200                    | ZNF551        | -3.877±0.28  | -4.123±0.422 | 4.42E-04 |
| cg18870712 | 19 | 58193426 | GeneBody/5'UTR/1st exon   | ZNF551        | -5.378±0.423 | -5.648±0.402 | 3.26E-03 |
| cg19455368 | 19 | 58361294 | GeneBody/5'UTR/1st exon   | ZNF587        | -4.762±0.613 | -5.237±0.539 | 4.18E-04 |
| cg17560327 | 19 | 58427757 | GeneBody/1st exon         | ZNF417        | -5.007±0.475 | -5.358±0.461 | 8.37E-04 |
| cg20176532 | 19 | 58458979 | GeneBody/5'UTR/1st exon   | ZNF256        | -4.482±0.389 | -4.915±0.453 | 5.64E-06 |
| cg02959669 | 19 | 58459358 | TSS1500                   | ZNF256        | -4.283±0.332 | -4.591±0.483 | 1.91E-04 |
| cg10770529 | 19 | 58695164 | GeneBody/5'UTR/1st intron | ZNF274        | -4.737±0.316 | -5.092±0.484 | 1.55E-05 |
| cg21020710 | 19 | 58739803 | TSS1500                   | ZNF544        | -4.768±0.319 | -5.012±0.365 | 8.31E-04 |
| cg27649653 | 19 | 58789751 | TSS1500                   | ZNF8          | -1.638±0.341 | -1.325±0.389 | 9.02E-05 |
| cg07122126 | 19 | 58790422 | GeneBody/5'UTR/1st exon   | ZNF8          | -5.145±0.457 | -5.478±0.4   | 8.21E-04 |
| cg22255355 | 19 | 58838374 | TSS200                    | ZSCAN22       | -5.512±0.445 | -5.957±0.655 | 7.34E-05 |
| cg26887625 | 19 | 58874030 | GeneBody/5'UTR/1st intron | ZNF497        | -5.682±0.442 | -6.055±0.636 | 5.66E-04 |
| cg03856786 | 19 | 58874501 | TSS1500                   | ZNF497        | -4.892±0.372 | -5.187±0.35  | 3.64E-04 |
| cg10402626 | 19 | 58898400 | TSS200                    | MIR4754       | -5.131±0.628 | -5.53±0.545  | 2.96E-03 |
| cg12195135 | 19 | 58919312 | TSS1500                   | ZNF584        | -2.369±0.271 | -2.598±0.366 | 4.31E-04 |
| cg19776201 | 19 | 58951434 | GeneBody/5'UTR/1st exon   | ZNF132        | -4.094±0.336 | -4.34±0.481  | 2.47E-03 |
| cg13877915 | 19 | 58951672 | TSS200                    | ZNF132        | -4.534±0.842 | -5.293±0.863 | 8.60E-05 |
| cg23473726 | 19 | 58978569 | GeneBody/5'UTR/1st intron | ZNF324        | -4.626±0.307 | -5.005±0.592 | 1.62E-05 |
| cg19649173 | 19 | 58987877 | GeneBody/5'UTR/1st intron | ZNF446        | -4.211±0.544 | -4.529±0.494 | 6.27E-03 |
| cg14042128 | 19 | 59066234 | GeneBody/5'UTR/1st exon   | CHMP2A        | -3.817±0.263 | -4.09±0.382  | 4.05E-05 |
| cg17223189 | 19 | 59066601 | TSS200                    | CHMP2A        | -5.409±0.527 | -5.978±0.585 | 7.93E-06 |
| cg21639968 | 19 | 59070227 | GeneBody/5'UTR/1st exon   | UBE2M         | -5.841±0.713 | -6.309±0.627 | 2.19E-03 |
| cg08704884 | 19 | 59070524 | TSS200                    | LOC100131691  | -3.3±0.298   | -3.518±0.553 | 6.60E-03 |
| cg10075436 | 19 | 59084928 | GeneBody/5'UTR/1st exon   | MZF1          | -4.695±0.373 | -4.989±0.4   | 5.11E-04 |
| cg11991627 | 20 | 271345   | GeneBody/5'UTR/1st exon   | C20orf96      | -5.135±0.588 | -5.49±0.548  | 5.04E-03 |
| cg23922081 | 20 | 306359   | GeneBody/5'UTR/1st exon   | SOX12         | -4.056±0.34  | -4.28±0.405  | 3.75E-03 |
| cg07115304 | 20 | 361903   | GeneBody/5'UTR/1st intron | TRIB3         | -3.992±0.379 | -4.28±0.427  | 8.26E-04 |
| cg12113932 | 20 | 388401   | TSS1500                   | RBCK1         | -4.203±0.386 | -4.637±0.469 | 5.73E-06 |
| cg20702327 | 20 | 524484   | TSS200                    | CSNK2A1       | -4.362±0.355 | -4.589±0.312 | 2.83E-03 |
| cg22100821 | 20 | 656743   | GeneBody/5'UTR/1st exon   | SCRT2         | -3.696±0.386 | -3.941±0.499 | 6.31E-03 |
| cg20289911 | 20 | 816362   | TSS1500                   | FAM110A       | -1.981±0.291 | -2.199±0.398 | 1.72E-03 |
| cg10996143 | 20 | 1373995  | TSS200                    | FKBP1A-SDCBP2 | -3.38±0.243  | -3.59±0.315  | 1.78E-04 |

|            |    |          |                           |                  |              |              |          |
|------------|----|----------|---------------------------|------------------|--------------|--------------|----------|
| cg15722679 | 20 | 1638393  | GeneBody/5'UTR/1st exon   | <i>SIRPG</i>     | -1.076±0.318 | -0.833±0.411 | 1.19E-03 |
| cg23080667 | 20 | 2082285  | TSS1500                   | <i>STK35</i>     | -5.206±0.467 | -5.541±0.451 | 1.09E-03 |
| cg23278885 | 20 | 2361431  | TSS200                    | <i>TGM6</i>      | 1.289±0.202  | 1.455±0.299  | 8.34E-04 |
| cg07355551 | 20 | 2489285  | GeneBody/5'UTR/1st intron | <i>ZNF343</i>    | -3.658±0.272 | -3.983±0.342 | 2.38E-06 |
| cg26132853 | 20 | 2632587  | TSS1500                   | <i>NOP56</i>     | -5.194±0.541 | -5.691±0.52  | 5.91E-05 |
| cg01292265 | 20 | 2633870  | GeneBody                  | <i>NOP56</i>     | -4.766±0.432 | -5.091±0.357 | 5.31E-04 |
| cg23191772 | 20 | 2644649  | GeneBody                  | <i>IDH3B</i>     | -4.711±0.523 | -5.124±0.477 | 3.60E-04 |
| cg19851137 | 20 | 2645051  | TSS200                    | <i>IDH3B</i>     | -4.338±0.464 | -4.68±0.549  | 1.32E-03 |
| cg06539804 | 20 | 2781489  | TSS200                    | <i>CPXM1</i>     | -4.796±0.505 | -5.171±0.582 | 1.12E-03 |
| cg01265637 | 20 | 2795930  | GeneBody/1st exon         | <i>C20orf141</i> | 2.809±0.179  | 2.92±0.2     | 5.46E-03 |
| cg07884474 | 20 | 2821816  | GeneBody/5'UTR/1st exon   | <i>PCED1A</i>    | -5.037±0.513 | -5.605±0.552 | 4.80E-06 |
| cg00176879 | 20 | 2843525  | TSS1500                   | <i>PTPRA</i>     | 5.625±0.331  | 5.822±0.323  | 6.01E-03 |
| cg07357256 | 20 | 3027028  | GeneBody                  | <i>MRPS26</i>    | -4.825±0.364 | -5.206±0.528 | 3.46E-05 |
| cg00554173 | 20 | 3149777  | TSS1500                   | <i>LZTS3</i>     | 1.585±0.206  | 1.752±0.246  | 5.03E-04 |
| cg18635110 | 20 | 3185384  | TSS200                    | <i>DDRGG1</i>    | -4.135±0.463 | -4.399±0.447 | 8.22E-03 |
| cg02810773 | 20 | 3190112  | TSS200                    | <i>ITPA</i>      | -5.278±0.429 | -5.674±0.589 | 1.58E-04 |
| cg08284598 | 20 | 3218145  | GeneBody/1st intron       | <i>SLC4A11</i>   | 1.731±0.222  | 1.964±0.295  | 2.31E-05 |
| cg04240200 | 20 | 3451292  | TSS1500                   | <i>ATRN</i>      | -4.243±0.272 | -4.395±0.264 | 9.45E-03 |
| cg11366015 | 20 | 3748106  | GeneBody/5'UTR/1st intron | <i>C20orf27</i>  | -6.554±0.439 | -6.071±0.483 | 5.01E-05 |
| cg14159818 | 20 | 3749519  | TSS1500                   | <i>C20orf27</i>  | -5.413±0.456 | -5.834±0.565 | 1.06E-04 |
| cg24889744 | 20 | 3761916  | GeneBody/1st exon         | <i>SPEF1</i>     | -3.086±0.302 | -3.33±0.442  | 9.78E-04 |
| cg17565490 | 20 | 3766961  | GeneBody/1st exon         | <i>CENPB</i>     | -4.766±0.48  | -5.103±0.538 | 1.83E-03 |
| cg03524627 | 20 | 3776483  | GeneBody/5'UTR/1st exon   | <i>CDC25B</i>    | -5.265±0.322 | -5.48±0.37   | 3.11E-03 |
| cg09049660 | 20 | 3869033  | TSS1500                   | <i>PANK2</i>     | -3.808±0.363 | -4.202±0.502 | 1.55E-05 |
| cg16977257 | 20 | 4701595  | TSS1500                   | <i>PRND</i>      | -4.335±0.246 | -4.581±0.384 | 1.03E-04 |
| cg09425898 | 20 | 4721250  | GeneBody/1st exon         | <i>PRNT</i>      | 2.941±0.197  | 3.173±0.349  | 1.81E-05 |
| cg16884569 | 20 | 4803636  | GeneBody/5'UTR/1st intron | <i>RASSF2</i>    | -4.657±0.33  | -5.075±0.516 | 2.41E-06 |
| cg27212099 | 20 | 503936   | TSS1500                   | <i>TMEM230</i>   | -4.035±0.214 | -4.188±0.237 | 1.54E-03 |
| cg04562739 | 20 | 5107446  | GeneBody/5'UTR/1st exon   | <i>CDS2</i>      | -5.639±0.617 | -6.201±0.554 | 5.72E-05 |
| cg17896229 | 20 | 5294595  | GeneBody/1st exon         | <i>PROKR2</i>    | 1.57±0.277   | 1.306±0.352  | 7.37E-05 |
| cg15842884 | 20 | 5591925  | TSS1500                   | <i>GPCPD1</i>    | -5.137±0.428 | -5.403±0.417 | 4.25E-03 |
| cg05486551 | 20 | 5731259  | GeneBody/5'UTR/1st intron | <i>C20orf196</i> | -2.35±0.458  | -2.633±0.502 | 5.58E-03 |
| cg27367554 | 20 | 5930982  | GeneBody/1st exon         | <i>TRMT6</i>     | -5.512±0.571 | -5.901±0.572 | 1.94E-03 |
| cg02025407 | 20 | 5986831  | GeneBody/5'UTR/1st exon   | <i>CRLS1</i>     | -5.318±0.389 | -5.559±0.436 | 5.61E-03 |
| cg18329036 | 20 | 5987489  | TSS1500                   | <i>CRLS1</i>     | -3.713±0.417 | -4.102±0.433 | 5.60E-05 |
| cg01797527 | 20 | 6749480  | GeneBody/5'UTR/1st exon   | <i>BMP2</i>      | -4.182±0.529 | -4.495±0.618 | 8.52E-03 |
| cg04741821 | 20 | 8000564  | TSS200                    | <i>TMX4</i>      | -6.444±0.46  | -5.025±0.564 | 4.17E-04 |
| cg07008386 | 20 | 8113630  | GeneBody/1st intron       | <i>PLCB1</i>     | -4.207±0.424 | -4.578±0.443 | 1.35E-04 |
| cg01144286 | 20 | 9495596  | GeneBody/1st intron       | <i>LAMP5</i>     | -3.744±0.259 | -3.964±0.364 | 4.91E-04 |
| cg06289589 | 20 | 10015419 | TSS1500                   | <i>ANKEF1</i>    | -4.556±0.384 | -4.91±0.381  | 6.04E-05 |
| cg27204739 | 20 | 10015783 | GeneBody/5'UTR/1st exon   | <i>ANKEF1</i>    | -5.683±0.503 | -6.046±0.533 | 1.25E-03 |
| cg23632840 | 20 | 10414722 | GeneBody/5'UTR/1st intron | <i>MKKS</i>      | -5.51±0.475  | -5.806±0.497 | 4.74E-03 |
| cg23643330 | 20 | 10654420 | GeneBody/5'UTR/1st exon   | <i>JAG1</i>      | -5.434±0.471 | -5.734±0.413 | 2.95E-03 |
| cg14159894 | 20 | 11872261 | GeneBody/5'UTR/1st intron | <i>BTBD3</i>     | -4.301±0.328 | -4.537±0.461 | 2.63E-03 |
| cg25125453 | 20 | 12989844 | GeneBody/5'UTR/1st exon   | <i>SPTLC3</i>    | -2.252±0.357 | -1.911±0.634 | 3.59E-04 |
| cg17309462 | 20 | 12990495 | GeneBody/1st intron       | <i>SPTLC3</i>    | -3.805±0.465 | -4.071±0.475 | 8.70E-03 |
| cg21065990 | 20 | 13619254 | GeneBody/5'UTR/1st intron | <i>TASP1</i>     | -5.694±0.641 | -6.108±0.535 | 2.39E-03 |
| cg03473294 | 20 | 13619704 | TSS200                    | <i>TASP1</i>     | -8.483±0.366 | -5.109±0.308 | 8.00E-04 |
| cg14251536 | 20 | 13765341 | GeneBody/5'UTR/1st intron | <i>ESF1</i>      | -4.059±0.712 | -4.548±0.675 | 1.61E-03 |
| cg23751724 | 20 | 13976403 | GeneBody/5'UTR/1st exon   | <i>MACROD2</i>   | -3.158±0.536 | -3.527±0.558 | 1.85E-03 |
| cg23455897 | 20 | 16553861 | GeneBody/1st intron       | <i>KIF16B</i>    | -5.365±0.559 | -5.709±0.538 | 4.51E-03 |
| cg18710985 | 20 | 16554249 | TSS200                    | <i>KIF16B</i>    | -4.634±0.457 | -5.032±0.447 | 1.21E-04 |
| cg23651728 | 20 | 17511410 | GeneBody/1st intron       | <i>BFSF1</i>     | -3.035±0.234 | -3.207±0.364 | 3.06E-03 |
| cg26371206 | 20 | 17512208 | TSS200                    | <i>BFSF1</i>     | -3.731±0.219 | -4.038±0.4   | 1.18E-06 |
| cg00083720 | 20 | 17550917 | GeneBody/1st intron       | <i>DSTN</i>      | -5.468±0.614 | -5.882±0.677 | 2.57E-03 |
| cg02425732 | 20 | 17662212 | GeneBody/5'UTR/1st intron | <i>RRBP1</i>     | -4.502±0.371 | -4.914±0.589 | 2.33E-05 |
| cg02460349 | 20 | 17663383 | TSS1500                   | <i>RRBP1</i>     | -5.276±0.529 | -5.668±0.515 | 7.95E-04 |
| cg20207753 | 20 | 17948278 | GeneBody/1st intron       | <i>SNX5</i>      | -3.02±0.556  | -3.416±0.457 | 9.14E-04 |
| cg06061892 | 20 | 17948694 | GeneBody/1st intron       | <i>SNX5</i>      | -4.953±0.393 | -5.454±0.559 | 1.29E-06 |
| cg15615135 | 20 | 17949655 | TSS200                    | <i>MGME1</i>     | -3.79±0.178  | -3.909±0.219 | 3.43E-03 |
| cg09486567 | 20 | 18038510 | GeneBody/5'UTR/1st exon   | <i>OVOL2</i>     | -4.491±0.363 | -4.802±0.535 | 5.25E-04 |
| cg14296147 | 20 | 18118706 | GeneBody/1st intron       | <i>PET117</i>    | -5.414±0.404 | -5.868±0.556 | 9.38E-06 |
| cg14858551 | 20 | 18269244 | GeneBody/5'UTR/1st exon   | <i>ZNF133</i>    | -4.195±0.647 | -4.705±0.608 | 3.84E-04 |
| cg17386991 | 20 | 18448250 | GeneBody/1st intron       | <i>POLR3F</i>    | -4.973±0.307 | -5.166±0.27  | 3.27E-03 |
| cg19370515 | 20 | 18477839 | GeneBody/5'UTR/1st exon   | <i>RBBP9</i>     | -4.943±0.341 | -5.167±0.327 | 2.55E-03 |
| cg22473095 | 20 | 18477967 | TSS200                    | <i>RBBP9</i>     | -4.327±0.385 | -4.663±0.349 | 1.05E-04 |
| cg15613982 | 20 | 18488017 | TSS200                    | <i>SEC23B</i>    | -4.45±0.421  | -4.709±0.532 | 7.61E-03 |
| cg04737319 | 20 | 18568568 | GeneBody/5'UTR/1st exon   | <i>DTD1</i>      | -4.583±0.343 | -5.027±0.642 | 5.83E-06 |
| cg07334912 | 20 | 18569196 | GeneBody/1st intron       | <i>DTD1</i>      | -4.409±0.305 | -4.748±0.441 | 1.32E-05 |
| cg01557989 | 20 | 19192675 | TSS1500                   | <i>SLC24A3</i>   | -4.238±0.33  | -4.462±0.559 | 8.26E-03 |
| cg08699435 | 20 | 19997606 | TSS1500                   | <i>NAA20</i>     | -4.291±0.406 | -4.603±0.464 | 7.75E-04 |
| cg20043466 | 20 | 21106097 | TSS1500                   | <i>PLK1S1</i>    | -3.942±0.379 | -4.194±0.5   | 4.48E-03 |
| cg11574758 | 20 | 21107113 | GeneBody/1st intron       | <i>PLK1S1</i>    | -4.508±0.235 | -4.696±0.234 | 3.53E-04 |
| cg23114866 | 20 | 21494977 | TSS1500                   | <i>NKX2-2</i>    | -3.985±0.291 | -4.273±0.384 | 5.29E-05 |
| cg09282338 | 20 | 23330591 | TSS1500                   | <i>NXT1</i>      | -4.458±0.362 | -4.891±0.526 | 4.17E-06 |
| cg08453968 | 20 | 23331934 | GeneBody/5'UTR/1st intron | <i>NXT1</i>      | -5.076±0.328 | -5.337±0.314 | 3.61E-04 |
| cg01539186 | 20 | 23343673 | TSS1500                   | <i>GZF1</i>      | -3.213±0.246 | -3.399±0.36  | 1.94E-03 |
| cg26170257 | 20 | 23345093 | GeneBody/1st exon         | <i>GZF1</i>      | 1.749±0.342  | 1.937±0.304  | 9.41E-03 |
| cg18456149 | 20 | 23401804 | GeneBody/1st intron       | <i>NAPB</i>      | -4.679±0.612 | -5.226±0.577 | 8.17E-05 |
| cg09953122 | 20 | 23471693 | TSS200                    | <i>CST8</i>      | 3.191±0.197  | 3.33±0.295   | 3.84E-03 |
| cg23033024 | 20 | 23472484 | GeneBody                  | <i>CST8</i>      | 2.406±0.168  | 2.509±0.197  | 6.30E-03 |
| cg23660082 | 20 | 23732166 | TSS1500                   | <i>CST1</i>      | 1.27±0.239   | 1.124±0.313  | 8.78E-03 |
| cg13424446 | 20 | 23969432 | TSS200                    | <i>GGTLC1</i>    | 1.439±0.196  | 1.567±0.295  | 7.78E-03 |
| cg12201164 | 20 | 24973333 | GeneBody/5'UTR/1st exon   | <i>APMAP</i>     | -6.197±0.653 | -6.647±0.56  | 1.35E-03 |
| cg16208271 | 20 | 25176149 | TSS200                    | <i>ENTPD6</i>    | -4.347±0.294 | -4.644±0.407 | 4.70E-05 |
| cg06269001 | 20 | 25176407 | GeneBody/5'UTR/1st exon   | <i>ENTPD6</i>    | -5.989±0.566 | -6.544±0.586 | 2.75E-05 |
| cg06421707 | 20 | 25228305 | TSS1500                   | <i>PYGB</i>      | -5.372±0.431 | -5.739±0.576 | 3.89E-04 |
| cg19434221 | 20 | 25371822 | TSS1500                   | <i>ABHD12</i>    | -4.095±0.504 | -4.444±0.606 | 2.43E-03 |
| cg17941312 | 20 | 25381464 | 0                         | 0                | 2.159±0.224  | 2.285±0.211  | 9.17E-03 |
| cg08093398 | 20 | 25382007 | 0                         | 0                | 1.559±0.313  | 1.269±0.382  | 9.38E-05 |
| cg04871004 | 20 | 25677445 | GeneBody/5'UTR/1st exon   | <i>ZNF337</i>    | -6.203±0.556 | -6.57±0.6    | 3.03E-03 |
| cg22190819 | 20 | 26036118 | GeneBody/1st intron       | <i>FAM182A</i>   | 0.745±0.143  | 0.654±0.172  | 5.26E-03 |
| cg26299767 | 20 | 30062987 | TSS200                    | <i>REM1</i>      | -3.24±0.219  | -3.423±0.373 | 1.33E-03 |
| cg25083781 | 20 | 30102296 | GeneBody/5'UTR/1st exon   | <i>HM13</i>      | -4.861±0.38  | -5.199±0.351 | 8.30E-05 |
| cg11850311 | 20 | 30192545 | TSS1500                   | <i>ID1</i>       | -4.267±0.449 | -4.608±0.565 | 1.13E-03 |

|            |    |           |                           |             |              |              |          |
|------------|----|-----------|---------------------------|-------------|--------------|--------------|----------|
| cg03154513 | 20 | 30193400  | GeneBody/1st exon         | ID1         | -4.858±0.304 | -5.203±0.46  | 1.23E-05 |
| cg16137862 | 20 | 30310246  | GeneBody/5'UTR/1st intron | BCL2L1      | -2.8±0.445   | -3.081±0.525 | 5.27E-03 |
| cg00782854 | 20 | 30310858  | TSS1500                   | BCL2L1      | -4.881±0.506 | -5.373±0.481 | 2.58E-05 |
| cg16338822 | 20 | 30326883  | TSS200                    | TPX2        | -4.361±0.434 | -4.637±0.567 | 6.27E-03 |
| cg21838233 | 20 | 30326920  | GeneBody/5'UTR/1st exon   | TPX2        | -5.037±0.581 | -5.53±0.527  | 1.47E-04 |
| cg27225570 | 20 | 30458267  | GeneBody/5'UTR/1st exon   | DUSP15      | -5.689±0.583 | -6.195±0.592 | 1.39E-04 |
| cg10211877 | 20 | 30539733  | GeneBody/1st exon         | PDRG1       | -5.086±0.373 | -5.467±0.625 | 1.09E-04 |
| cg20979896 | 20 | 30539958  | TSS200                    | PDRG1       | -5.031±0.543 | -5.404±0.576 | 2.00E-03 |
| cg08623947 | 20 | 30640164  | GeneBody/5'UTR/1st exon   | HCK         | -4.39±0.381  | -4.636±0.405 | 3.54E-03 |
| cg25811820 | 20 | 30795836  | GeneBody/1st exon         | POFUT1      | -4.186±0.234 | -4.504±0.422 | 1.89E-06 |
| cg01951308 | 20 | 30865502  | GeneBody/5'UTR/1st exon   | KIF3B       | -4.706±0.51  | -5.167±0.524 | 8.33E-05 |
| cg10812811 | 20 | 31070849  | GeneBody/5'UTR/1st intron | C20orf112   | -4.852±0.522 | -5.347±0.527 | 4.29E-05 |
| cg01221637 | 20 | 31071944  | TSS1500                   | C20orf112   | -5.054±0.361 | -5.295±0.421 | 3.12E-03 |
| cg16483466 | 20 | 31671234  | GeneBody                  | BPIFB4      | 1.354±0.258  | 1.526±0.293  | 3.00E-03 |
| cg11854007 | 20 | 31781697  | GeneBody/1st intron       | BPIFA4P     | -1.585±0.204 | -1.737±0.295 | 2.02E-03 |
| cg26079992 | 20 | 31988906  | GeneBody/5'UTR/1st intron | CDK5RAP1    | -4.818±0.364 | -5.074±0.48  | 2.75E-03 |
| cg06335889 | 20 | 32077519  | TSS1500                   | CBFA2T2     | -4.303±0.315 | -4.515±0.352 | 2.69E-03 |
| cg21523528 | 20 | 32077966  | GeneBody/5'UTR/1st exon   | CBFA2T2     | -4.967±0.667 | -5.433±0.648 | 1.45E-03 |
| cg20520365 | 20 | 32250069  | TSS200                    | C20orf144   | 3.339±0.189  | 3.467±0.305  | 7.30E-03 |
| cg27431396 | 20 | 32250213  | GeneBody/1st exon         | C20orf144   | 3.534±0.226  | 3.736±0.326  | 2.89E-04 |
| cg10054127 | 20 | 32262111  | GeneBody/1st exon         | NECAB3      | -6.048±0.555 | -6.425±0.625 | 2.54E-03 |
| cg15056412 | 20 | 32262523  | TSS1500                   | NECAB3      | -4.165±0.362 | -4.423±0.399 | 1.51E-03 |
| cg24088408 | 20 | 32274875  | TSS1500                   | E2F1        | -1.151±0.383 | -0.511±0.639 | 1.41E-08 |
| cg08428707 | 20 | 32398882  | TSS1500                   | CHMP4B      | -4.818±0.407 | -5.098±0.399 | 1.75E-03 |
| cg02435593 | 20 | 32399369  | GeneBody/1st exon         | CHMP4B      | -1.792±0.28  | -2.01±0.318  | 6.66E-04 |
| cg04025889 | 20 | 32891089  | GeneBody/5'UTR/1st exon   | AHCY        | -4.566±0.33  | -4.854±0.458 | 3.26E-04 |
| cg05674199 | 20 | 32891428  | TSS1500                   | AHCY        | -2.507±0.24  | -2.362±0.242 | 5.55E-03 |
| cg27262488 | 20 | 32950909  | TSS200                    | ITCH        | -5.503±0.407 | -5.912±0.396 | 1.72E-05 |
| cg13789523 | 20 | 33104204  | GeneBody/5'UTR/1st exon   | DYNLRB1     | -5.703±0.499 | -6.051±0.523 | 1.71E-03 |
| cg14181391 | 20 | 33265182  | TSS200                    | PIGU        | -4.973±0.415 | -5.218±0.441 | 7.35E-03 |
| cg01483882 | 20 | 33292450  | GeneBody/5'UTR/1st intron | TP53INP2    | -5.321±0.493 | -5.989±0.678 | 3.80E-07 |
| cg19794490 | 20 | 33412943  | GeneBody/5'UTR/1st intron | NCOA6       | -4.116±0.503 | -4.406±0.504 | 8.09E-03 |
| cg04710918 | 20 | 33543972  | GeneBody/5'UTR/1st intron | MYH7B       | -3.983±0.286 | -4.323±0.393 | 3.71E-06 |
| cg10035303 | 20 | 33680179  | GeneBody/1st intron       | TRPC4AP     | -2.237±0.411 | -1.651±0.698 | 5.18E-07 |
| cg27477990 | 20 | 33735081  | GeneBody/1st exon         | EDEM2       | -6.331±0.63  | -6.812±0.553 | 4.97E-04 |
| cg21802726 | 20 | 33735257  | TSS200                    | EDEM2       | -4.174±0.444 | -4.526±0.572 | 7.91E-04 |
| cg04316754 | 20 | 33815109  | GeneBody/1st intron       | MMP24       | -3.255±0.674 | -3.875±0.684 | 6.39E-05 |
| cg27270218 | 20 | 33872806  | TSS200                    | EIF6        | -3.691±0.258 | -3.88±0.341  | 1.89E-03 |
| cg00350702 | 20 | 34129927  | GeneBody/1st exon         | ERGIC3      | -4.855±0.522 | -5.423±0.627 | 8.82E-06 |
| cg14961385 | 20 | 34204167  | GeneBody/1st exon         | SPAG4       | -3.693±0.358 | -3.926±0.485 | 5.78E-03 |
| cg18497960 | 20 | 34253082  | TSS1500                   | RBM12       | -4.441±0.31  | -4.782±0.487 | 2.48E-05 |
| cg14963897 | 20 | 34288750  | TSS1500                   | NFS1        | 3.18±0.233   | 3.373±0.284  | 4.03E-04 |
| cg01470283 | 20 | 34542109  | GeneBody                  | SCAND1      | -5.393±0.59  | -5.808±0.601 | 1.50E-03 |
| cg14324838 | 20 | 34700675  | GeneBody/5'UTR            | EPB41L1     | 2.081±0.682  | 1.503±1.332  | 2.19E-03 |
| cg16016641 | 20 | 34824197  | TSS200                    | AAR2        | -3.626±0.394 | -3.87±0.421  | 5.12E-03 |
| cg11449935 | 20 | 35202477  | GeneBody/5'UTR/1st intron | TGIF2       | -4.43±0.34   | -4.858±0.5   | 1.89E-06 |
| cg19230917 | 20 | 35234226  | GeneBody/5'UTR/1st exon   | C20orf24    | -5.789±0.504 | -6.136±0.549 | 2.07E-03 |
| cg06499565 | 20 | 35374747  | TSS1500                   | NDRG3       | -3.554±0.437 | -3.901±0.602 | 9.33E-04 |
| cg09128050 | 20 | 35580168  | GeneBody/5'UTR/1st exon   | SAMHD1      | -5.068±0.391 | -5.322±0.396 | 3.01E-03 |
| cg21570468 | 20 | 35724588  | TSS200                    | RBL1        | -4.917±0.259 | -5.083±0.235 | 2.96E-03 |
| cg15627502 | 20 | 35806795  | TSS1500                   | RPN2        | -4.235±0.6   | -4.586±0.665 | 8.41E-03 |
| cg13946860 | 20 | 35807510  | GeneBody/5'UTR/1st exon   | RPN2        | -5.862±0.545 | -6.522±0.568 | 1.05E-06 |
| cg17049328 | 20 | 35886434  | TSS1500                   | GHRH        | 2.697±0.217  | 2.821±0.223  | 8.64E-03 |
| cg07719737 | 20 | 35917850  | TSS200                    | MANBAL      | -4.137±0.546 | -4.477±0.625 | 5.56E-03 |
| cg21449843 | 20 | 35918440  | GeneBody/5'UTR/1st intron | MANBAL      | -4.577±0.39  | -4.834±0.477 | 4.02E-03 |
| cg23594876 | 20 | 361155925 | GeneBody/5'UTR/1st intron | BLCAP       | -4.677±0.359 | -5.056±0.323 | 6.90E-06 |
| cg11599505 | 20 | 36532096  | GeneBody/1st intron       | VSTM2L      | 2.971±0.382  | 3.278±0.439  | 4.78E-04 |
| cg14424111 | 20 | 36662310  | GeneBody/5'UTR/1st exon   | RPRD1B      | -4.897±0.348 | -5.109±0.442 | 8.52E-03 |
| cg09113613 | 20 | 37101903  | GeneBody/5'UTR/1st intron | RALGAPB     | -4.786±0.298 | -4.988±0.321 | 2.34E-03 |
| cg03532879 | 20 | 37209395  | TSS1500                   | ADIG        | 2.158±0.21   | 2.287±0.199  | 4.20E-03 |
| cg26826852 | 20 | 37377424  | GeneBody/1st exon         | ACTR5       | -4.661±0.401 | -4.917±0.62  | 9.97E-03 |
| cg07955828 | 20 | 37591298  | GeneBody/1st intron       | DHX35       | -4.444±0.316 | -4.695±0.453 | 1.08E-03 |
| cg11668512 | 20 | 39929580  | TSS1500                   | ZHX3        | 3.207±0.306  | 3.392±0.364  | 7.54E-03 |
| cg21545849 | 20 | 40247209  | TSS200                    | CHD6        | -5.331±0.297 | -5.672±0.502 | 2.05E-05 |
| cg07440387 | 20 | 42086266  | TSS1500                   | SRSF6       | -4.423±0.668 | -4.867±0.686 | 2.57E-03 |
| cg20091959 | 20 | 42142451  | TSS1500                   | L3MBTL1     | 0.756±0.143  | 0.874±0.191  | 5.46E-04 |
| cg02551396 | 20 | 42815882  | GeneBody/5'UTR/1st exon   | JPH2        | -4.113±0.299 | -4.42±0.396  | 2.98E-05 |
| cg24442290 | 20 | 42838850  | GeneBody/5'UTR/1st intron | OSER1       | -3.966±0.354 | -4.199±0.292 | 1.95E-03 |
| cg20925482 | 20 | 42839882  | GeneBody/1st exon         | OSER1-AS1   | -5.031±0.37  | -5.297±0.329 | 9.17E-04 |
| cg17810944 | 20 | 42876091  | GeneBody/1st exon         | GDAP1L1     | -3.011±0.223 | -3.279±0.361 | 7.36E-06 |
| cg03812067 | 20 | 43150641  | GeneBody/5'UTR/1st exon   | SERINC3     | -4.184±0.313 | -4.514±0.426 | 2.38E-05 |
| cg13240311 | 20 | 43160795  | GeneBody/5'UTR/1st intron | PKIG        | -4.059±0.584 | -4.59±0.561  | 6.69E-05 |
| cg12063359 | 20 | 43374632  | GeneBody/1st exon         | KCNK15      | -5.407±0.443 | -5.809±0.459 | 7.98E-05 |
| cg07064406 | 20 | 43513064  | TSS1500                   | YWHAB       | 2.916±0.18   | 3.047±0.183  | 1.05E-03 |
| cg22799917 | 20 | 43514951  | GeneBody/5'UTR/1st intron | YWHAB       | -4.802±0.582 | -5.24±0.543  | 6.17E-04 |
| cg11454415 | 20 | 43588633  | GeneBody/1st intron       | TOMM34      | -4.173±0.376 | -4.442±0.428 | 1.61E-03 |
| cg27194614 | 20 | 43594895  | GeneBody/1st exon         | STK4-AS1    | -4.366±0.364 | -4.68±0.533  | 4.76E-04 |
| cg20485165 | 20 | 43753049  | GeneBody/1st exon         | WFDC12      | 1.388±0.227  | 1.553±0.308  | 2.13E-03 |
| cg04545516 | 20 | 43836061  | GeneBody                  | SEMG1       | 1.036±0.207  | 0.909±0.276  | 8.72E-03 |
| cg12966875 | 20 | 43883746  | TSS1500                   | SLPI        | -3.214±0.316 | -3.44±0.365  | 8.84E-03 |
| cg16757724 | 20 | 43935528  | GeneBody/5'UTR/1st exon   | RBPJL       | 1.732±0.273  | 1.944±0.325  | 7.67E-04 |
| cg09882647 | 20 | 43991346  | TSS1500                   | SYS1        | -3.005±0.333 | -3.299±0.415 | 1.95E-04 |
| cg05451974 | 20 | 43991922  | GeneBody/1st exon         | SYS1-DBNDD2 | -5.682±0.406 | -6.22±0.632  | 1.09E-06 |
| cg07294870 | 20 | 44044586  | TSS200                    | PIGT        | -4.586±0.57  | -4.924±0.532 | 5.79E-03 |
| cg22021786 | 20 | 44207288  | GeneBody/1st intron       | WFDC8       | 2.594±0.2    | 2.416±0.29   | 3.23E-04 |
| cg02605634 | 20 | 44258384  | GeneBody/5'UTR/1st exon   | WFDC10A     | -2.833±0.304 | -3.04±0.374  | 3.02E-03 |
| cg11953868 | 20 | 44258437  | GeneBody/5'UTR/1st exon   | WFDC10A     | -2.883±0.299 | -3.074±0.351 | 4.89E-03 |
| cg22988566 | 20 | 44334869  | TSS1500                   | WFDC10B     | 2.152±0.223  | 2.306±0.306  | 3.62E-03 |
| cg15419274 | 20 | 44421026  | GeneBody/1st intron       | DNTTIP1     | -4.67±0.551  | -5.111±0.466 | 2.65E-04 |
| cg13736875 | 20 | 44441064  | TSS200                    | UBE2C       | -5.495±0.471 | -5.868±0.565 | 6.34E-04 |
| cg19222480 | 20 | 44441446  | GeneBody/1st intron       | UBE2C       | -4.815±0.31  | -5.004±0.34  | 6.08E-03 |
| cg08201421 | 20 | 44456101  | TSS200                    | TNNC2       | 1.869±0.172  | 2.089±0.282  | 2.77E-06 |
| cg23134520 | 20 | 44485949  | GeneBody/1st exon         | ACOT8       | -5.093±0.455 | -5.487±0.624 | 3.61E-04 |
| cg08101264 | 20 | 44486710  | GeneBody/1st intron       | ZSWIM3      | -3.529±0.322 | -3.823±0.423 | 1.50E-04 |
| cg25241845 | 20 | 44519697  | GeneBody/5'UTR/1st exon   | CTSA        | -6.213±0.583 | -6.629±0.544 | 1.08E-03 |

|            |    |          |                           |            |              |              |          |
|------------|----|----------|---------------------------|------------|--------------|--------------|----------|
| cg21762107 | 20 | 44519951 | TSS200                    | NEURL2     | -5.143±0.324 | -5.584±0.538 | 9.74E-07 |
| cg26220350 | 20 | 44540621 | GeneBody/5'UTR/1st intron | PLTP       | -3.48±0.38   | -3.729±0.443 | 3.79E-03 |
| cg11399590 | 20 | 44564022 | GeneBody/5'UTR/1st intron | PCIF1      | -4.833±0.335 | -5.101±0.363 | 4.36E-04 |
| cg21218093 | 20 | 44600160 | GeneBody/5'UTR/1st intron | ZNF335     | -4.302±0.407 | -4.565±0.46  | 4.05E-03 |
| cg09378691 | 20 | 44600971 | TSS200                    | ZNF335     | -4.767±0.33  | -5.071±0.477 | 1.96E-04 |
| cg02310296 | 20 | 44637358 | TSS200                    | MMP9       | -1.826±0.243 | -1.586±0.27  | 3.09E-05 |
| cg17111669 | 20 | 44718800 | TSS1500                   | NCOA5      | -3.834±0.566 | -4.276±0.522 | 4.17E-04 |
| cg04506546 | 20 | 44992831 | GeneBody/5'UTR/1st intron | SLC35C2    | -6.112±0.664 | -6.776±0.572 | 1.42E-05 |
| cg03334529 | 20 | 45088229 | 0                         | 0          | -3.101±0.228 | -3.303±0.325 | 3.23E-04 |
| cg23026920 | 20 | 45317919 | GeneBody/1st exon         | TP53RK     | -5.489±0.689 | -6.024±0.581 | 3.76E-04 |
| cg27610561 | 20 | 45337784 | TSS1500                   | SLC2A10    | 2.056±0.406  | 2.348±0.431  | 1.31E-03 |
| cg17550582 | 20 | 45338652 | GeneBody/1st intron       | SLC2A10    | -4.814±0.389 | -5.056±0.531 | 8.32E-03 |
| cg23214267 | 20 | 45523137 | TSS200                    | EYA2       | -3.711±0.504 | -4.039±0.61  | 4.35E-03 |
| cg24364574 | 20 | 47443694 | GeneBody/1st intron       | PREX1      | -2.65±0.343  | -2.909±0.324 | 6.25E-04 |
| cg09345431 | 20 | 47538576 | GeneBody/1st intron       | ARFGEF2    | -5.05±0.459  | -5.363±0.546 | 2.78E-03 |
| cg06838394 | 20 | 47538719 | GeneBody/1st intron       | ARFGEF2    | -3.296±0.191 | -3.504±0.327 | 4.91E-05 |
| cg03558299 | 20 | 47662597 | TSS200                    | CSE1L      | -4.876±0.363 | -5.184±0.467 | 3.63E-04 |
| cg08162572 | 20 | 47663143 | GeneBody/5'UTR/1st intron | CSE1L      | -6.06±0.447  | -6.375±0.598 | 2.86E-03 |
| cg03522403 | 20 | 47805138 | TSS1500                   | STAU1      | -4.395±0.356 | -4.662±0.399 | 9.66E-04 |
| cg18677965 | 20 | 47836128 | GeneBody/1st intron       | DDX27      | -4.312±0.199 | -4.434±0.235 | 7.02E-03 |
| cg20150565 | 20 | 47893859 | TSS1500                   | ZFAS1      | -2.425±0.574 | -2.945±0.573 | 8.60E-05 |
| cg01924619 | 20 | 48330560 | TSS200                    | B4GALT5    | -5.924±0.574 | -6.441±0.648 | 1.12E-04 |
| cg13210512 | 20 | 48531577 | GeneBody/5'UTR/1st intron | SPATA2     | -4.109±0.248 | -4.258±0.243 | 5.69E-03 |
| cg08794192 | 20 | 48532354 | TSS1500                   | SPATA2     | -5.77±0.581  | -6.108±0.604 | 7.81E-03 |
| cg02046340 | 20 | 48552742 | TSS200                    | RNF114     | -3.63±0.343  | -3.861±0.342 | 2.09E-03 |
| cg13310671 | 20 | 48553087 | GeneBody/1st exon         | RNF114     | -5.408±0.399 | -5.885±0.666 | 9.60E-06 |
| cg05403071 | 20 | 48599682 | GeneBody/1st intron       | SNAI1      | -4.367±0.299 | -4.7±0.443   | 1.54E-05 |
| cg17371067 | 20 | 48807380 | GeneBody/5'UTR/1st exon   | CEBPB      | -5.594±0.411 | -5.888±0.398 | 1.11E-03 |
| cg15864184 | 20 | 49126874 | GeneBody/5'UTR/1st exon   | PTPN1      | -2.381±0.314 | -2.627±0.35  | 6.00E-04 |
| cg14915263 | 20 | 49127137 | GeneBody/1st intron       | PTPN1      | -5.876±0.615 | -6.529±0.638 | 8.59E-06 |
| cg14823109 | 20 | 49411412 | TSS200                    | BCAS4      | -5.044±0.476 | -5.328±0.485 | 6.38E-03 |
| cg20028291 | 20 | 49411856 | GeneBody/1st intron       | BCAS4      | -4.729±0.498 | -5.068±0.457 | 1.66E-03 |
| cg13216351 | 20 | 49575105 | TSS200                    | DPM1       | -4.41±0.495  | -4.752±0.621 | 2.78E-03 |
| cg04542415 | 20 | 50808759 | TSS1500                   | ZFP64      | -5.672±0.452 | -5.946±0.501 | 6.41E-03 |
| cg08899632 | 20 | 50809000 | TSS1500                   | ZFP64      | -5.204±0.442 | -5.836±0.622 | 1.35E-07 |
| cg00476577 | 20 | 52200408 | TSS1500                   | ZNF217     | -3.147±0.308 | -3.491±0.391 | 7.02E-06 |
| cg13347296 | 20 | 52825087 | GeneBody/1st intron       | PFDN4      | -4.852±0.382 | -5.194±0.484 | 1.80E-04 |
| cg09260441 | 20 | 53091739 | TSS1500                   | DOK5       | -3.586±0.317 | -3.777±0.355 | 6.93E-03 |
| cg22732672 | 20 | 54967037 | GeneBody/5'UTR/1st intron | AURKA      | -5.108±0.382 | -5.366±0.394 | 2.17E-03 |
| cg21772838 | 20 | 54967497 | GeneBody/5'UTR/1st exon   | CSTF1      | -5.99±0.457  | -6.35±0.444  | 4.08E-04 |
| cg00831028 | 20 | 55043745 | GeneBody/5'UTR/1st exon   | RTFDC1     | -4.042±0.345 | -4.383±0.362 | 2.59E-05 |
| cg19734148 | 20 | 55926119 | TSS200                    | RAE1       | -5.131±0.508 | -5.552±0.439 | 1.83E-04 |
| cg05045383 | 20 | 55926193 | GeneBody/5'UTR/1st exon   | RAE1       | -5.272±0.505 | -5.62±0.493  | 1.63E-03 |
| cg23137254 | 20 | 55966732 | GeneBody/1st exon         | RBM38      | -5.337±0.519 | -5.982±0.695 | 1.46E-06 |
| cg08783491 | 20 | 57226061 | TSS1500                   | STX16      | -4.334±0.284 | -4.651±0.481 | 3.24E-05 |
| cg03076871 | 20 | 57226737 | GeneBody/5'UTR/1st exon   | STX16      | -4.521±0.534 | -5.109±0.645 | 7.36E-06 |
| cg01817393 | 20 | 57427642 | TSS1500                   | GNAS       | -0.777±0.311 | -0.99±0.374  | 2.70E-03 |
| cg21988465 | 20 | 57429277 | GeneBody/1st exon         | GNAS       | 1.092±0.153  | 1.213±0.185  | 6.51E-04 |
| cg07284407 | 20 | 57429858 | GeneBody/1st exon         | GNAS       | 0.434±0.152  | 0.54±0.148   | 1.48E-03 |
| cg21625881 | 20 | 57430313 | GeneBody/1st exon         | GNAS       | 0.91±0.098   | 1.012±0.133  | 2.68E-05 |
| cg25283297 | 20 | 57430916 | GeneBody/1st intron/3'UTR | GNAS       | 1.132±0.126  | 1.269±0.165  | 1.16E-05 |
| cg01565918 | 20 | 57457492 | GeneBody/1st intron/3'UTR | GNAS       | 2.988±0.251  | 3.171±0.296  | 1.49E-03 |
| cg06044900 | 20 | 57467811 | GeneBody/1st intron       | GNAS       | -4.311±0.268 | -4.489±0.432 | 8.22E-03 |
| cg08304608 | 20 | 57594200 | TSS200                    | TUBB1      | 2.928±0.217  | 3.194±0.309  | 2.69E-06 |
| cg24457521 | 20 | 57607420 | GeneBody/5'UTR/1st exon   | ATP5E      | -4.585±0.767 | -5.142±0.646 | 7.81E-04 |
| cg11595749 | 20 | 57607571 | TSS200                    | ATP5E      | -5.202±0.747 | -5.673±0.598 | 2.81E-03 |
| cg15580043 | 20 | 60719730 | GeneBody/1st intron       | SS18L1     | -4.633±0.547 | -5.111±0.56  | 1.31E-04 |
| cg24587268 | 20 | 60813121 | TSS1500                   | OSBPL2     | -3.995±0.325 | -4.269±0.392 | 3.03E-04 |
| cg08364102 | 20 | 60814547 | GeneBody/5'UTR/1st intron | OSBPL2     | -2.246±0.276 | -2.434±0.297 | 2.24E-03 |
| cg21459921 | 20 | 60878267 | GeneBody/5'UTR/1st intron | ADRM1      | -4.332±0.521 | -4.871±0.556 | 1.32E-05 |
| cg09831553 | 20 | 60943241 | TSS1500                   | LAMA5      | -4.228±0.369 | -4.576±0.422 | 6.13E-05 |
| cg02603366 | 20 | 60962040 | TSS200                    | RPS21      | -5.005±0.443 | -5.306±0.583 | 3.70E-03 |
| cg03035419 | 20 | 60962318 | GeneBody/5'UTR/1st intron | RPS21      | -6.165±0.561 | -6.522±0.611 | 4.20E-03 |
| cg16542081 | 20 | 61041701 | GeneBody                  | GATA5      | 2.604±0.414  | 2.914±0.406  | 7.44E-04 |
| cg06479426 | 20 | 61274286 | GeneBody/5'UTR/1st intron | SLCO4A1    | -4.972±0.439 | -5.403±0.547 | 4.66E-05 |
| cg25826526 | 20 | 61426675 | TSS1500                   | MRGBP      | -4.759±0.388 | -5.25±0.487  | 8.43E-07 |
| cg24999924 | 20 | 61428215 | GeneBody/1st intron       | MRGBP      | -4.095±0.46  | -4.404±0.614 | 4.25E-03 |
| cg08525481 | 20 | 61436809 | GeneBody/1st intron       | OGFR-AS1   | -5.655±0.516 | -6±0.5       | 2.21E-03 |
| cg11118665 | 20 | 61493341 | TSS1500                   | TCFL5      | -4.876±0.453 | -5.309±0.609 | 9.08E-05 |
| cg18071588 | 20 | 61569198 | GeneBody/5'UTR/1st exon   | DIDO1      | -6.025±0.655 | -6.684±0.675 | 1.85E-05 |
| cg17364922 | 20 | 61847127 | GeneBody/1st intron       | YTHDF1     | -4.764±0.313 | -5.051±0.45  | 2.03E-04 |
| cg21944757 | 20 | 61904196 | GeneBody/5'UTR/1st exon   | ARFGAP1    | -5.007±0.414 | -5.385±0.407 | 6.58E-05 |
| cg15616083 | 20 | 62104607 | TSS1500                   | KCNQ2      | -0.836±0.253 | -1.021±0.306 | 1.45E-03 |
| cg21484834 | 20 | 62168579 | GeneBody/1st exon         | PTK6       | 1.114±0.179  | 1.231±0.232  | 4.98E-03 |
| cg18248891 | 20 | 62169472 | TSS1500                   | PTK6       | -4.465±0.592 | -4.891±0.538 | 9.82E-04 |
| cg05004940 | 20 | 62185074 | GeneBody/5'UTR/1st intron | C20orf195  | -4.34±0.403  | -4.652±0.359 | 4.22E-04 |
| cg23352030 | 20 | 62198469 | GeneBody/1st exon         | HELZ2      | 3.465±0.355  | 3.775±0.493  | 3.37E-04 |
| cg08291098 | 20 | 62285239 | TSS1500                   | STMN3      | -4.156±0.451 | -4.481±0.454 | 1.12E-03 |
| cg24549085 | 20 | 62289802 | GeneBody/5'UTR/1st exon   | RTEL1      | -5.465±0.628 | -5.944±0.508 | 4.41E-04 |
| cg18611245 | 20 | 62338235 | TSS1500                   | ZGPAT      | -2.399±0.331 | -2.627±0.339 | 1.78E-03 |
| cg00177013 | 20 | 62339100 | GeneBody/5'UTR/1st intron | ARFRP1     | -3.267±0.285 | -3.436±0.317 | 7.71E-03 |
| cg09655559 | 20 | 62496256 | TSS1500                   | TPD52L2    | -4.908±0.431 | -5.205±0.414 | 1.62E-03 |
| cg14448145 | 20 | 62525650 | TSS1500                   | DNAJC5     | -0.97±0.126  | -0.853±0.197 | 2.85E-04 |
| cg02047577 | 20 | 62587702 | GeneBody/1st exon         | UCKL1      | -5.799±0.414 | -6.053±0.53  | 7.91E-03 |
| cg24524435 | 20 | 62588125 | TSS1500                   | UCKL1      | -3.727±0.542 | -4.049±0.446 | 4.78E-03 |
| cg15568167 | 20 | 62610530 | GeneBody/1st intron       | SAMD10     | -5.377±0.498 | -5.917±0.601 | 9.36E-06 |
| cg12379775 | 20 | 62669791 | GeneBody                  | LINC00176  | -4.121±0.323 | -4.38±0.497  | 1.30E-03 |
| cg24516061 | 20 | 62710773 | GeneBody/5'UTR/1st exon   | RGS19      | -5.301±0.402 | -5.623±0.432 | 4.28E-04 |
| cg14436426 | 20 | 62712394 | GeneBody/5'UTR/1st intron | OPRL1      | 2.522±0.206  | 2.662±0.238  | 2.61E-03 |
| cg13218906 | 20 | 62886751 | TSS1500                   | PCMTD2     | -4.489±0.665 | -4.963±0.54  | 8.92E-04 |
| cg07973461 | 21 | 11098794 | GeneBody/5'UTR/1st exon   | BAGE3      | 2.843±0.316  | 2.602±0.345  | 7.43E-04 |
| cg05674444 | 21 | 14414818 | GeneBody/1st intron       | ANKRD30BP2 | -1.445±0.203 | -1.574±0.253 | 5.87E-03 |
| cg24847572 | 21 | 15755606 | TSS200                    | HSPA13     | -5.619±0.462 | -6.02±0.434  | 1.19E-04 |
| cg01141769 | 21 | 17101987 | TSS1500                   | USP25      | -4.961±0.487 | -5.322±0.516 | 9.44E-04 |
| cg06114765 | 21 | 17102990 | GeneBody/1st intron       | USP25      | -4.129±0.285 | -4.384±0.355 | 1.66E-04 |

|            |    |          |                           |                    |              |              |          |
|------------|----|----------|---------------------------|--------------------|--------------|--------------|----------|
| cg02532648 | 21 | 18984770 | GeneBody/5'UTR/1st intron | <i>BTG3</i>        | -4.604±0.699 | -5.038±0.843 | 6.41E-03 |
| cg01284306 | 21 | 19190629 | GeneBody                  | <i>C21orf91</i>    | -3.467±0.461 | -3.741±0.503 | 7.30E-03 |
| cg06076054 | 21 | 19191045 | GeneBody/5'UTR/1st intron | <i>C21orf91</i>    | -4.709±0.367 | -5.102±0.48  | 1.57E-05 |
| cg13297960 | 21 | 22370237 | TSS1500                   | <i>NCAM2</i>       | -3.208±0.433 | -3.484±0.484 | 4.34E-03 |
| cg09809950 | 21 | 26979850 | TSS200                    | <i>MRPL39</i>      | -5.673±0.494 | -6.02±0.477  | 1.38E-03 |
| cg16069236 | 21 | 26980353 | TSS1500                   | <i>MRPL39</i>      | -4.322±0.433 | -4.58±0.475  | 7.05E-03 |
| cg15842400 | 21 | 27107004 | TSS1500                   | <i>GABPA</i>       | -5.047±0.402 | -5.507±0.495 | 4.28E-06 |
| cg19891733 | 21 | 27108257 | TSS1500                   | <i>ATP5J</i>       | -4.552±0.375 | -4.864±0.518 | 5.83E-04 |
| cg25085950 | 21 | 27108830 | TSS1500                   | <i>ATP5J</i>       | -2.792±0.507 | -3.101±0.392 | 3.61E-03 |
| cg27032352 | 21 | 29384327 | TSS1500                   | <i>LINC00314</i>   | -2.217±0.271 | -2.459±0.286 | 1.00E-04 |
| cg03117949 | 21 | 30396586 | TSS1500                   | <i>USP16</i>       | -3.244±0.478 | -3.609±0.611 | 1.12E-03 |
| cg23772557 | 21 | 30397240 | GeneBody/5'UTR/1st intron | <i>USP16</i>       | -5.396±0.527 | -5.777±0.451 | 8.43E-04 |
| cg22074666 | 21 | 30452729 | TSS200                    | <i>MAP3K7CL</i>    | 1.357±0.303  | 1.165±0.396  | 6.50E-03 |
| cg02493771 | 21 | 31744328 | GeneBody/1st exon         | <i>KRTAP13-2</i>   | -1.081±0.225 | -1.305±0.227 | 2.03E-05 |
| cg06748315 | 21 | 31864089 | GeneBody/1st exon         | <i>KRTAP19-3</i>   | 2.787±0.31   | 2.995±0.359  | 2.97E-03 |
| cg03029616 | 21 | 31986034 | GeneBody/1st exon         | <i>KRTAP6-1</i>    | 2.214±0.176  | 2.34±0.218   | 1.87E-03 |
| cg18841894 | 21 | 33031735 | TSS200                    | <i>SOD1</i>        | -4.766±0.522 | -5.288±0.516 | 1.83E-05 |
| cg19948014 | 21 | 33032656 | GeneBody/1st intron       | <i>SOD1</i>        | -5.139±0.551 | -5.732±0.634 | 8.96E-06 |
| cg06510830 | 21 | 33651316 | GeneBody/1st exon         | <i>MIS18A</i>      | -5.146±0.47  | -5.675±0.666 | 1.00E-05 |
| cg25505974 | 21 | 33984651 | GeneBody/1st exon         | <i>C21orf59</i>    | -5.168±0.467 | -5.716±0.743 | 9.38E-06 |
| cg20644453 | 21 | 33985338 | TSS1500                   | <i>C21orf59</i>    | -4.894±0.336 | -5.22±0.55   | 1.89E-04 |
| cg04047710 | 21 | 34143336 | GeneBody/1st intron       | <i>PAXBP1</i>      | -4.58±0.27   | -4.93±0.43   | 1.78E-06 |
| cg06665941 | 21 | 34602869 | GeneBody/5'UTR/1st intron | <i>IFNAR2</i>      | -5.127±0.231 | -5.435±0.46  | 5.83E-06 |
| cg17506742 | 21 | 34638971 | GeneBody/1st intron       | <i>IL10RB</i>      | -4.418±0.465 | -4.7±0.461   | 5.37E-03 |
| cg23508786 | 21 | 34775291 | GeneBody/5'UTR/1st exon   | <i>IFNGR2</i>      | -2.82±0.43   | -3.155±0.413 | 4.50E-04 |
| cg16803817 | 21 | 34851621 | GeneBody/5'UTR/1st intron | <i>TMEM50B</i>     | -3.642±0.236 | -3.921±0.325 | 4.14E-06 |
| cg04383274 | 21 | 34863711 | GeneBody/5'UTR/1st exon   | <i>DNAJC28</i>     | -3.863±0.299 | -4.067±0.354 | 2.71E-03 |
| cg07673945 | 21 | 34914336 | GeneBody/5'UTR/1st intron | <i>GART</i>        | -4.941±0.384 | -5.255±0.419 | 3.32E-04 |
| cg26265060 | 21 | 34915941 | GeneBody/1st intron       | <i>SON</i>         | -3.721±0.5   | -3.997±0.456 | 9.69E-03 |
| cg22407574 | 21 | 34960583 | GeneBody/1st intron       | <i>DONSON</i>      | -4.762±0.434 | -5.045±0.502 | 3.97E-03 |
| cg08701609 | 21 | 34961305 | TSS1500                   | <i>DONSON</i>      | -4.654±0.241 | -4.792±0.266 | 9.80E-03 |
| cg06502510 | 21 | 35013970 | GeneBody/5'UTR/1st intron | <i>CRYZL1</i>      | -4.371±0.41  | -4.751±0.504 | 9.96E-05 |
| cg18665023 | 21 | 35287873 | GeneBody/1st intron       | <i>ATP5O</i>       | -4.326±0.298 | -4.583±0.569 | 1.65E-03 |
| cg15249164 | 21 | 35288186 | TSS200                    | <i>ATP5O</i>       | -5.955±0.522 | -6.403±0.512 | 1.44E-04 |
| cg20206574 | 21 | 35987860 | TSS1500                   | <i>RCAN1</i>       | -3.571±0.434 | -3.874±0.58  | 3.07E-03 |
| cg01962969 | 21 | 37442104 | TSS200                    | <i>CBR1</i>        | -4.484±0.406 | -4.769±0.494 | 2.18E-03 |
| cg13552650 | 21 | 37692233 | TSS1500                   | <i>MORC3</i>       | -2.794±0.326 | -2.413±0.424 | 3.78E-06 |
| cg19624775 | 21 | 37692840 | GeneBody/1st intron       | <i>MORC3</i>       | -5.517±0.55  | -5.878±0.58  | 2.94E-03 |
| cg27519424 | 21 | 38362420 | GeneBody/5'UTR/1st intron | <i>HLCS</i>        | -3.319±0.63  | -3.732±0.741 | 3.81E-03 |
| cg19207856 | 21 | 38444952 | GeneBody/5'UTR/1st exon   | <i>PIGP</i>        | -4.689±0.442 | -5.111±0.497 | 5.00E-05 |
| cg23361608 | 21 | 38446389 | GeneBody/5'UTR/1st intron | <i>TTC3</i>        | -4.793±0.376 | -5.167±0.485 | 4.43E-05 |
| cg18779060 | 21 | 38740667 | GeneBody/5'UTR/1st intron | <i>DYRK1A</i>      | -3.751±0.236 | -4.01±0.36   | 2.24E-05 |
| cg03993463 | 21 | 39627271 | TSS1500                   | <i>KCNJ15</i>      | 2.289±0.243  | 2.556±0.397  | 3.21E-05 |
| cg11890956 | 21 | 40555474 | TSS200                    | <i>PSMG1</i>       | -5.392±0.513 | -5.993±0.591 | 2.40E-06 |
| cg22982528 | 21 | 40686185 | TSS1500                   | <i>BRWD1</i>       | -5.533±0.556 | -5.925±0.559 | 1.40E-03 |
| cg13287780 | 21 | 40751665 | TSS1500                   | <i>WRB</i>         | 1.87±0.277   | 2.03±0.271   | 7.55E-03 |
| cg00171126 | 21 | 40752522 | GeneBody/1st intron       | <i>WRB</i>         | -4.481±0.422 | -4.764±0.651 | 6.69E-03 |
| cg23704703 | 21 | 40816035 | GeneBody/5'UTR/1st intron | <i>LCA5L</i>       | 3.012±0.191  | 3.161±0.191  | 4.76E-04 |
| cg12064626 | 21 | 40817896 | GeneBody/5'UTR/1st intron | <i>SH3BGR</i>      | -4.773±0.424 | -5.095±0.605 | 1.68E-03 |
| cg22152328 | 21 | 42798386 | GeneBody/5'UTR/1st intron | <i>MX1</i>         | -4.691±0.306 | -4.994±0.449 | 8.43E-05 |
| cg04469303 | 21 | 43299431 | GeneBody/1st exon         | <i>PRDM15</i>      | -5.294±0.551 | -5.75±0.551  | 2.45E-04 |
| cg11064558 | 21 | 43430383 | GeneBody/5'UTR/1st exon   | <i>ZBTB21</i>      | -5.641±0.685 | -6.108±0.508 | 1.27E-03 |
| cg20488657 | 21 | 43736926 | TSS1500                   | <i>TF3</i>         | 2.012±0.236  | 2.184±0.305  | 1.79E-03 |
| cg11772764 | 21 | 43916603 | TSS1500                   | <i>RSPH1</i>       | -5.668±0.47  | -6.134±0.499 | 2.49E-05 |
| cg13265003 | 21 | 43919023 | TSS1500                   | <i>SLC37A1</i>     | 1.214±0.196  | 1.326±0.205  | 9.15E-03 |
| cg00516481 | 21 | 44073202 | TSS1500                   | <i>PDE9A</i>       | -2.731±0.403 | -2.464±0.44  | 2.92E-03 |
| cg17329518 | 21 | 44299567 | GeneBody/1st exon         | <i>WDR4</i>        | -5.157±0.437 | -5.694±0.683 | 4.03E-06 |
| cg02533993 | 21 | 44299944 | TSS1500                   | <i>WDR4</i>        | -4.461±0.444 | -5.019±0.578 | 1.10E-06 |
| cg17400229 | 21 | 44527180 | GeneBody/1st intron       | <i>U2AF1</i>       | -4.585±0.361 | -4.83±0.583  | 7.04E-03 |
| cg22730042 | 21 | 44528293 | TSS1500                   | <i>U2AF1</i>       | -4.182±0.304 | -4.51±0.463  | 2.88E-05 |
| cg15536230 | 21 | 44985092 | GeneBody                  | <i>HSF2BP</i>      | 2.161±0.398  | 2.391±0.453  | 9.72E-03 |
| cg25023829 | 21 | 44985491 | GeneBody                  | <i>HSF2BP</i>      | 2.366±0.307  | 2.568±0.325  | 3.00E-03 |
| cg08871016 | 21 | 45079232 | GeneBody/5'UTR/1st intron | <i>HSF2BP</i>      | -3.828±0.622 | -4.2±0.627   | 6.12E-03 |
| cg25791888 | 21 | 45080032 | GeneBody/1st intron       | <i>RRP1B</i>       | -4.2±0.274   | -4.388±0.413 | 5.12E-03 |
| cg23185262 | 21 | 45137544 | TSS1500                   | <i>PDXK</i>        | 1.258±0.25   | 1.435±0.279  | 1.66E-03 |
| cg15893253 | 21 | 45195739 | GeneBody/1st intron       | <i>CSTB</i>        | -4.715±0.493 | -5.214±0.568 | 2.38E-05 |
| cg11166823 | 21 | 45284425 | TSS1500                   | <i>AGPAT3</i>      | -5.392±0.482 | -5.705±0.449 | 2.64E-03 |
| cg15321195 | 21 | 45285898 | GeneBody/5'UTR/1st intron | <i>AGPAT3</i>      | -3.899±0.462 | -4.329±0.406 | 4.23E-05 |
| cg24868525 | 21 | 45431669 | TSS1500                   | <i>TRAPPC10</i>    | -2.822±0.155 | -2.99±0.271  | 5.94E-05 |
| cg16606185 | 21 | 45553535 | GeneBody/5'UTR/1st exon   | <i>C21orf33</i>    | -4.554±0.278 | -4.96±0.587  | 2.05E-06 |
| cg05129930 | 21 | 45719797 | TSS200                    | <i>PFKL</i>        | -5.406±0.483 | -5.724±0.559 | 3.47E-03 |
| cg18027946 | 21 | 45758982 | GeneBody/1st intron       | <i>C21orf2</i>     | -4.531±0.458 | -4.799±0.36  | 5.18E-03 |
| cg02513045 | 21 | 45759502 | TSS1500                   | <i>C21orf2</i>     | -5.176±0.594 | -5.723±0.555 | 5.38E-05 |
| cg22991148 | 21 | 46131099 | GeneBody/1st intron       | <i>TSPEAR</i>      | -3.301±0.305 | -3.527±0.433 | 2.06E-03 |
| cg20576597 | 21 | 46131668 | TSS200                    | <i>TSPEAR</i>      | -4.046±0.31  | -4.227±0.324 | 7.48E-03 |
| cg16698781 | 21 | 46221955 | TSS1500                   | <i>UBE2G2</i>      | -5.849±0.493 | -6.173±0.488 | 2.63E-03 |
| cg16500334 | 21 | 46238534 | TSS1500                   | <i>SUMO3</i>       | -3.322±0.333 | -3.523±0.376 | 6.82E-03 |
| cg01419679 | 21 | 46294237 | TSS1500                   | <i>PTTG1IP</i>     | -4.762±0.361 | -5.18±0.521  | 6.83E-06 |
| cg24167037 | 21 | 46340776 | TSS200                    | <i>ITGB2-AS1</i>   | -0.396±0.246 | -0.589±0.322 | 9.32E-04 |
| cg02706881 | 21 | 46845775 | TSS1500                   | <i>COL18A1-AS1</i> | 2.512±0.219  | 2.7±0.339    | 6.24E-04 |
| cg23272214 | 21 | 47269843 | TSS200                    | <i>PCBP3</i>       | 2.061±0.288  | 1.605±0.389  | 1.45E-08 |
| cg01245595 | 21 | 47648645 | GeneBody/1st exon         | <i>LSS</i>         | -4.586±0.331 | -4.911±0.591 | 2.64E-04 |
| cg19830147 | 21 | 47649323 | GeneBody/1st intron       | <i>MCM3AP-AS1</i>  | -4.868±0.572 | -5.203±0.616 | 7.92E-03 |
| cg00499599 | 21 | 47706392 | GeneBody/5'UTR/1st exon   | <i>YBEY</i>        | -4.966±0.411 | -5.353±0.506 | 8.17E-05 |
| cg16319213 | 21 | 47742881 | GeneBody/5'UTR/1st exon   | <i>C21orf58</i>    | -4.132±0.287 | -4.411±0.458 | 1.60E-04 |
| cg25110234 | 21 | 47744248 | GeneBody/1st intron       | <i>PCNT</i>        | -4.847±0.296 | -5.186±0.462 | 1.25E-05 |
| cg06725035 | 21 | 48055212 | TSS1500                   | <i>PRMT2</i>       | -3.919±0.655 | -4.589±0.647 | 1.28E-05 |
| cg13271076 | 21 | 48055715 | GeneBody/5'UTR/1st intron | <i>PRMT2</i>       | -4.442±0.21  | -4.63±0.349  | 5.31E-04 |
| cg01731685 | 22 | 17565455 | TSS1500                   | <i>IL17RA</i>      | -4.21±0.336  | -4.536±0.47  | 9.03E-05 |
| cg26506209 | 22 | 18111277 | GeneBody/1st intron       | <i>ATP6V1E1</i>    | -4.035±0.336 | -4.357±0.441 | 8.10E-05 |
| cg03887534 | 22 | 18121194 | TSS200                    | <i>BCL2L13</i>     | -4.197±0.436 | -4.541±0.668 | 1.51E-03 |
| cg17264817 | 22 | 18121799 | GeneBody/5'UTR/1st intron | <i>BCL2L13</i>     | -5.638±0.545 | -6.196±0.656 | 2.33E-05 |
| cg05566965 | 22 | 18256588 | GeneBody/5'UTR/1st exon   | <i>BID</i>         | -4.792±0.39  | -5.036±0.385 | 4.11E-03 |
| cg15104484 | 22 | 18560503 | TSS200                    | <i>PEX26</i>       | -4.699±0.457 | -5.159±0.471 | 1.85E-05 |
| cg16281796 | 22 | 18560863 | GeneBody/5'UTR/1st exon   | <i>PEX26</i>       | -4.597±0.299 | -4.918±0.463 | 3.39E-05 |

|             |    |          |                           |                  |              |              |          |
|-------------|----|----------|---------------------------|------------------|--------------|--------------|----------|
| cg08715837  | 22 | 18593609 | GeneBody/5'UTR/1st intron | <i>TUBA8</i>     | -4.041±0.331 | -3.759±0.419 | 3.22E-04 |
| cg08205655  | 22 | 18632997 | GeneBody/5'UTR/1st intron | <i>USP18</i>     | -3.842±0.418 | -4.232±0.645 | 2.27E-04 |
| cg22297305  | 22 | 18923471 | GeneBody/5'UTR/1st intron | <i>PRODH</i>     | -4.605±0.323 | -4.89±0.485  | 4.07E-04 |
| cg00812502  | 22 | 19109875 | GeneBody/5'UTR/1st exon   | <i>DGCR2</i>     | -5.671±0.67  | -6.209±0.566 | 2.61E-04 |
| cg16621987  | 22 | 19110328 | TSS1500                   | <i>DGCR2</i>     | -3.632±0.46  | -3.926±0.451 | 3.35E-03 |
| cg25759381  | 22 | 19118539 | GeneBody/5'UTR/1st exon   | <i>TSSK2</i>     | 2.137±0.178  | 2.292±0.252  | 3.91E-04 |
| cg00747849  | 22 | 19165386 | GeneBody                  | <i>SLC25A1</i>   | -1.18±0.261  | -1.373±0.347 | 1.73E-03 |
| cg23957084  | 22 | 19418954 | GeneBody/1st intron       | <i>HIRA</i>      | -5.171±0.589 | -5.528±0.517 | 4.49E-03 |
| cg17881637  | 22 | 19420236 | GeneBody/1st intron       | <i>MRPL40</i>    | -4.766±0.332 | -5.237±0.452 | 1.33E-07 |
| cg25841091  | 22 | 19466331 | GeneBody/1st intron       | <i>UFD1L</i>     | -4.427±0.329 | -4.653±0.463 | 4.12E-03 |
| cg25990314  | 22 | 19841927 | GeneBody/5'UTR            | <i>C22orf29</i>  | -4.634±0.4   | -4.971±0.486 | 3.23E-04 |
| cg22377998  | 22 | 20004881 | TSS1500                   | <i>ARVCF</i>     | -2.969±0.353 | -3.229±0.357 | 9.37E-04 |
| cg18251360  | 22 | 20067313 | TSS1500                   | <i>DGCR8</i>     | -5.126±0.598 | -5.8±0.735   | 5.49E-06 |
| cg11594228  | 22 | 20103649 | GeneBody/5'UTR/1st exon   | <i>RANBP1</i>    | 0.355±0.133  | 0.457±0.16   | 9.62E-04 |
| cg02630122  | 22 | 20104473 | GeneBody/5'UTR            | <i>TRMT2A</i>    | -3.805±0.269 | -4.01±0.443  | 2.77E-03 |
| cg25650110  | 22 | 20119463 | GeneBody/5'UTR/1st exon   | <i>ZDHHC8</i>    | -5.038±0.647 | -5.485±0.539 | 1.26E-03 |
| cg03475420  | 22 | 20255667 | GeneBody/5'UTR/1st exon   | <i>RTN4R</i>     | -5.083±0.464 | -5.46±0.473  | 3.23E-04 |
| cg08557686  | 22 | 20256063 | TSS1500                   | <i>RTN4R</i>     | -3.64±0.297  | -3.446±0.433 | 7.08E-03 |
| cg09958090  | 22 | 20851056 | TSS1500                   | <i>KLHL22</i>    | -4.62±0.367  | -4.89±0.495  | 1.90E-03 |
| cg09788239  | 22 | 20862292 | GeneBody/1st intron       | <i>MED15</i>     | -4.338±0.465 | -4.68±0.616  | 1.83E-03 |
| cg26832154  | 22 | 21055435 | GeneBody/1st exon         | <i>TMEM191A</i>  | 2.446±0.356  | 2.647±0.337  | 8.34E-03 |
| cg19669036  | 22 | 21212365 | GeneBody/1st intron       | <i>PI4KA</i>     | -4.545±0.416 | -4.924±0.43  | 7.57E-05 |
| cg17239761  | 22 | 21213665 | GeneBody/1st intron       | <i>SNAP29</i>    | -4.353±0.39  | -4.62±0.422  | 2.17E-03 |
| cg05139924  | 22 | 21336424 | TSS200                    | <i>LZTR1</i>     | -4.886±0.623 | -5.279±0.581 | 3.51E-03 |
| cg14835962  | 22 | 21355944 | TSS1500                   | <i>THAP7-AS1</i> | -4.114±0.309 | -4.369±0.496 | 1.17E-03 |
| cg17353431  | 22 | 21356784 | TSS1500                   | <i>THAP7</i>     | -4.312±0.574 | -4.661±0.689 | 7.46E-03 |
| cg14916200  | 22 | 21771710 | GeneBody/5'UTR/1st exon   | <i>HIC2</i>      | -5.647±0.538 | -5.97±0.549  | 6.08E-03 |
| cg21372397  | 22 | 21772221 | GeneBody/5'UTR/1st intron | <i>HIC2</i>      | -5.851±0.533 | -6.236±0.635 | 1.63E-03 |
| cg15477600  | 22 | 21996253 | TSS1500                   | <i>SDF2L1</i>    | -4.54±0.374  | -4.869±0.592 | 5.39E-04 |
| cg05725452  | 22 | 21996709 | GeneBody/1st exon         | <i>SDF2L1</i>    | -5.378±0.705 | -6.017±0.691 | 7.26E-05 |
| cg08293367  | 22 | 22089752 | GeneBody/5'UTR/1st intron | <i>YPEL1</i>     | -4.141±0.249 | -4.409±0.422 | 5.53E-05 |
| cg20295671  | 22 | 22090486 | TSS1500                   | <i>YPEL1</i>     | -5.716±0.602 | -6.115±0.929 | 7.24E-03 |
| cg11265916  | 22 | 22221056 | GeneBody/1st intron       | <i>MAPK1</i>     | -5.097±0.503 | -5.5±0.521   | 3.82E-04 |
| cg10081899  | 22 | 22307482 | TSS1500                   | <i>PPM1F</i>     | -4.278±0.344 | -4.664±0.361 | 3.71E-06 |
| cg14844130  | 22 | 22598937 | TSS1500                   | <i>VPREB1</i>    | -2.116±0.253 | -2.313±0.354 | 1.24E-03 |
| cg09034836  | 22 | 22986350 | GeneBody/1st exon         | <i>POM121L1P</i> | 3.229±0.243  | 3.394±0.377  | 6.43E-03 |
| cg08709385  | 22 | 22986667 | GeneBody/1st exon         | <i>POM121L1P</i> | 3.444±0.307  | 3.648±0.344  | 3.05E-03 |
| cg18593668  | 22 | 23411986 | TSS1500                   | <i>GNAZ</i>      | -4.309±0.371 | -4.527±0.394 | 7.74E-03 |
| cg15572787  | 22 | 23484171 | GeneBody/5'UTR/1st exon   | <i>RTDR1</i>     | -6.144±0.432 | -6.415±0.386 | 3.41E-03 |
| cg10575414  | 22 | 23484308 | TSS200                    | <i>RTDR1</i>     | -4.607±0.328 | -4.82±0.286  | 2.35E-03 |
| cg12406417  | 22 | 23522551 | GeneBody/5'UTR/1st exon   | <i>BCR</i>       | -4.002±0.262 | -4.25±0.427  | 2.61E-04 |
| cg25555137  | 22 | 23522748 | GeneBody/5'UTR/1st exon   | <i>BCR</i>       | -5.177±0.491 | -5.648±0.765 | 1.65E-04 |
| cg04435377  | 22 | 23744094 | GeneBody                  | <i>ZDHHC8P1</i>  | 2.093±0.288  | 2.29±0.395   | 4.02E-03 |
| cg05266460  | 22 | 24032819 | TSS1500                   | <i>RGL4</i>      | 1.881±0.204  | 1.727±0.308  | 2.19E-03 |
| cg12620111  | 22 | 24093496 | TSS1500                   | <i>ZNF70</i>     | -4.384±0.346 | -4.65±0.456  | 1.15E-03 |
| cg12279128  | 22 | 24109851 | GeneBody/1st intron       | <i>CHCHD10</i>   | -3.811±0.322 | -4.158±0.493 | 3.02E-05 |
| cg03290040  | 22 | 24110355 | TSS1500                   | <i>CHCHD10</i>   | -5.034±0.348 | -5.341±0.346 | 1.05E-04 |
| cg19906397  | 22 | 24129020 | TSS200                    | <i>SMARCB1</i>   | -4.512±0.373 | -4.743±0.427 | 5.75E-03 |
| cg20377673  | 22 | 24236292 | TSS1500                   | <i>MIF</i>       | -5.728±0.469 | -6.09±0.445  | 4.82E-04 |
| cg15061008  | 22 | 24407907 | GeneBody/5'UTR/1st exon   | <i>CABIN1</i>    | -4.19±0.365  | -4.433±0.474 | 4.33E-03 |
| cg23349242  | 22 | 24577448 | GeneBody/5'UTR/1st exon   | <i>SUSD2</i>     | 0.421±0.172  | 0.534±0.185  | 3.10E-03 |
| cg21584430  | 22 | 24829462 | GeneBody                  | <i>ADORA2A</i>   | 0.929±0.168  | 1.035±0.229  | 7.61E-03 |
| cg03550508  | 22 | 24951766 | GeneBody/5'UTR/1st exon   | <i>SNRPD3</i>    | -4.939±0.345 | -5.334±0.505 | 9.22E-06 |
| cg25221625  | 22 | 25595955 | GeneBody/5'UTR/1st intron | <i>CRYBB3</i>    | 2.247±0.175  | 2.356±0.219  | 6.84E-03 |
| cg21353232  | 22 | 26564879 | TSS1500                   | <i>SEZ6L</i>     | -2.829±0.393 | -3.057±0.432 | 8.70E-03 |
| cg11792483  | 22 | 26824763 | TSS1500                   | <i>ASPHD2</i>    | -5.404±0.486 | -5.706±0.419 | 3.49E-03 |
| cg04626574  | 22 | 26879726 | GeneBody/1st intron       | <i>HPS4</i>      | -4.162±0.325 | -4.49±0.398  | 2.96E-05 |
| cg10927536  | 22 | 26880188 | GeneBody/1st intron       | <i>SRRD</i>      | -4.934±0.424 | -5.215±0.505 | 3.59E-03 |
| cg23365832  | 22 | 26986032 | GeneBody/5'UTR/1st exon   | <i>TPST2</i>     | -5.672±0.451 | -6.002±0.474 | 1.07E-03 |
| cg05352541  | 22 | 28315563 | GeneBody/1st intron       | <i>TTC28-AS1</i> | -5.105±0.283 | -5.478±0.426 | 9.50E-07 |
| cg251112853 | 22 | 29136685 | GeneBody/5'UTR/1st intron | <i>CHEK2</i>     | 0.511±0.317  | 0.267±0.4    | 9.97E-04 |
| cg22585269  | 22 | 29137759 | GeneBody/5'UTR/1st exon   | <i>CHEK2</i>     | -2.872±0.554 | -3.308±0.7   | 8.15E-04 |
| cg16189954  | 22 | 29138267 | GeneBody/1st exon         | <i>HSCB</i>      | -4.941±0.276 | -5.272±0.422 | 5.27E-06 |
| cg01407797  | 22 | 29168514 | TSS200                    | <i>CCDC117</i>   | -3.657±0.322 | -3.912±0.31  | 3.83E-04 |
| cg15103426  | 22 | 29168792 | GeneBody/5'UTR/1st exon   | <i>CCDC117</i>   | -4.944±0.547 | -5.317±0.508 | 1.67E-03 |
| cg14013300  | 22 | 29196047 | GeneBody/1st intron       | <i>XPB1</i>      | -4.282±0.39  | -4.593±0.532 | 8.76E-04 |
| cg14588638  | 22 | 29665400 | GeneBody/1st intron       | <i>EWSR1</i>     | -4.536±0.379 | -4.819±0.437 | 1.04E-03 |
| cg04329069  | 22 | 29784237 | GeneBody/5'UTR/1st intron | <i>AP1B1</i>     | -5.535±0.47  | -5.86±0.453  | 1.56E-03 |
| cg08693206  | 22 | 29784697 | TSS200                    | <i>AP1B1</i>     | -5.479±0.414 | -5.717±0.399 | 7.79E-03 |
| cg04483623  | 22 | 29949575 | GeneBody/5'UTR/1st exon   | <i>THOC5</i>     | -5.013±0.556 | -5.442±0.597 | 6.24E-04 |
| cg20319264  | 22 | 29977203 | TSS200                    | <i>NIPSNAP1</i>  | -4.921±0.526 | -5.358±0.483 | 1.94E-04 |
| cg13240639  | 22 | 30162856 | GeneBody/5'UTR/1st intron | <i>ZMAT5</i>     | -4.212±0.302 | -4.541±0.425 | 1.67E-05 |
| cg12352006  | 22 | 30163351 | TSS200                    | <i>UQCR10</i>    | -4.823±0.455 | -5.176±0.515 | 6.87E-04 |
| cg01468868  | 22 | 30642653 | GeneBody/1st intron       | <i>LIF</i>       | -4.392±0.321 | -4.579±0.304 | 6.69E-03 |
| cg15630759  | 22 | 30752524 | TSS200                    | <i>CCDC157</i>   | -5.601±0.341 | -5.897±0.347 | 1.39E-04 |
| cg14859749  | 22 | 30753135 | TSS1500                   | <i>SF3A1</i>     | -5.541±0.729 | -6.186±0.687 | 9.16E-05 |
| cg23568913  | 22 | 30987549 | GeneBody/1st intron       | <i>PES1</i>      | -5.956±0.563 | -6.298±0.462 | 4.02E-03 |
| cg00059424  | 22 | 30988148 | TSS1500                   | <i>PES1</i>      | -4.303±0.36  | -4.675±0.521 | 4.31E-05 |
| cg17693957  | 22 | 31002757 | GeneBody/1st intron       | <i>PES1</i>      | -3.794±0.399 | -4.036±0.403 | 5.41E-03 |
| cg02278071  | 22 | 31063986 | TSS200                    | <i>DUSP18</i>    | -4.328±0.284 | -4.57±0.528  | 1.63E-03 |
| cg03560597  | 22 | 31064008 | TSS200                    | <i>DUSP18</i>    | -5.292±0.581 | -5.682±0.548 | 2.00E-03 |
| cg07006526  | 22 | 31477053 | TSS1500                   | <i>SMTN</i>      | -5.903±0.568 | -6.403±0.543 | 1.04E-04 |
| cg19630506  | 22 | 31477530 | GeneBody/5'UTR/1st intron | <i>SMTN</i>      | -4.935±0.33  | -5.267±0.486 | 6.86E-05 |
| cg13145458  | 22 | 31556086 | GeneBody/1st exon         | <i>MIR3928</i>   | -5.218±0.503 | -5.554±0.445 | 1.91E-03 |
| cg03760705  | 22 | 31556320 | GeneBody/1st intron       | <i>RNF185</i>    | -3.459±0.723 | -3.984±0.729 | 1.07E-03 |
| cg03065202  | 22 | 31687698 | GeneBody/1st intron       | <i>PIK3IP1</i>   | -4.45±0.377  | -4.826±0.529 | 6.00E-05 |
| cg20988728  | 22 | 31688502 | GeneBody/5'UTR/1st exon   | <i>PIK3IP1</i>   | -4.719±0.369 | -5.056±0.374 | 7.07E-05 |
| cg23154002  | 22 | 31741741 | GeneBody/5'UTR/1st exon   | <i>PATZ1</i>     | -4.707±0.356 | -5.046±0.434 | 6.74E-05 |
| cg09189428  | 22 | 31743558 | TSS1500                   | <i>PATZ1</i>     | -5.584±0.473 | -6.029±0.467 | 4.57E-05 |
| cg25545182  | 22 | 31795303 | TSS1500                   | <i>DRG1</i>      | -4.773±0.32  | -5.2±0.505   | 9.96E-07 |
| cg27378424  | 22 | 31795766 | GeneBody/1st intron       | <i>DRG1</i>      | -5.218±0.385 | -5.494±0.532 | 2.67E-03 |
| cg11442050  | 22 | 31886454 | TSS1500                   | <i>EIF4ENIF1</i> | -4.641±0.362 | -4.91±0.405  | 1.04E-03 |
| cg00184884  | 22 | 31892343 | GeneBody/5'UTR/1st exon   | <i>SFI1</i>      | -5.471±0.383 | -5.918±0.573 | 7.27E-06 |
| cg03814826  | 22 | 32341378 | TSS200                    | <i>C22orf24</i>  | -4.754±0.447 | -5.05±0.499  | 3.10E-03 |
| cg13507893  | 22 | 32650997 | GeneBody/1st intron       | <i>SLC5A4</i>    | 1.822±0.336  | 1.616±0.448  | 8.75E-03 |

|            |    |          |                           |           |              |              |          |
|------------|----|----------|---------------------------|-----------|--------------|--------------|----------|
| cg21578906 | 22 | 32651345 | TSS200                    | SLC5A4    | 2.554±0.25   | 2.71±0.298   | 6.00E-03 |
| cg00406844 | 22 | 32753939 | GeneBody/5'UTR/1st exon   | RFPL3     | 1.196±0.195  | 1.366±0.292  | 4.55E-04 |
| cg15175577 | 22 | 32808177 | GeneBody/5'UTR/1st exon   | RTCB      | -4.962±0.486 | -5.281±0.481 | 2.63E-03 |
| cg13788301 | 22 | 35695944 | GeneBody/1st exon         | TOM1      | -5.075±0.33  | -5.305±0.492 | 4.31E-03 |
| cg20162146 | 22 | 35795394 | TSS1500                   | MCM5      | 2.097±0.438  | 2.36±0.375   | 4.61E-03 |
| cg19853703 | 22 | 36044792 | GeneBody/5'UTR/1st intron | APOL6     | -4.158±0.284 | -4.345±0.292 | 2.78E-03 |
| cg13810225 | 22 | 36784323 | TSS1500                   | MYH9      | -4.145±0.388 | -4.44±0.526  | 1.45E-03 |
| cg27158143 | 22 | 36925763 | TSS1500                   | EIF3D     | -4.268±0.559 | -4.68±0.511  | 7.53E-04 |
| cg21341807 | 22 | 37172566 | TSS1500                   | IFT27     | -5.179±0.507 | -5.667±0.62  | 5.76E-05 |
| cg02978737 | 22 | 37216067 | TSS1500                   | PVALB     | 1.334±0.188  | 1.19±0.192   | 5.99E-04 |
| cg16356956 | 22 | 37317934 | GeneBody/5'UTR/1st intron | CSF2RB    | 2.376±0.291  | 2.538±0.281  | 9.84E-03 |
| cg14850181 | 22 | 37416188 | GeneBody/5'UTR/1st intron | TST       | -5.046±0.328 | -5.447±0.428 | 1.80E-06 |
| cg18452324 | 22 | 37882397 | GeneBody/5'UTR/1st exon   | MFNG      | -3.923±0.434 | -4.293±0.489 | 2.23E-04 |
| cg13797282 | 22 | 37914859 | GeneBody/1st intron       | CARD10    | 0.644±0.187  | 0.761±0.23   | 6.24E-03 |
| cg13951472 | 22 | 37956103 | TSS1500                   | CDC42EP1  | -2.591±0.285 | -2.42±0.356  | 9.26E-03 |
| cg24480194 | 22 | 38004444 | TSS200                    | GGA1      | -4.582±0.413 | -4.828±0.488 | 8.45E-03 |
| cg21458116 | 22 | 38004573 | GeneBody/5'UTR/1st exon   | GGA1      | -4.59±0.356  | -4.858±0.388 | 8.48E-04 |
| cg04790936 | 22 | 38035753 | GeneBody/5'UTR/1st exon   | SH3BP1    | -5.742±0.639 | -6.268±0.596 | 2.23E-04 |
| cg00292662 | 22 | 38071168 | TSS1500                   | LGALS1    | -4.856±0.334 | -5.06±0.358  | 5.67E-03 |
| cg11995732 | 22 | 38082787 | GeneBody/1st intron       | NOL12     | -5.491±0.417 | -5.763±0.46  | 3.43E-03 |
| cg06521852 | 22 | 38141419 | TSS1500                   | TRIOBP    | -2.205±0.333 | -2.411±0.376 | 5.57E-03 |
| cg12598364 | 22 | 38203677 | TSS1500                   | GCAAT     | -4.739±0.347 | -5.14±0.51   | 7.92E-06 |
| cg22975712 | 22 | 38218945 | TSS1500                   | GALR3     | 1.419±0.226  | 1.581±0.295  | 2.22E-03 |
| cg22031736 | 22 | 38239648 | GeneBody/1st intron       | ANKRD54   | -4.683±0.69  | -5.341±0.694 | 3.88E-05 |
| cg19070798 | 22 | 38240558 | TSS200                    | MIR658    | -5.045±0.451 | -5.455±0.461 | 7.75E-05 |
| cg15853374 | 22 | 38245447 | GeneBody/5'UTR/1st exon   | EIF3L     | -4.657±0.304 | -4.834±0.316 | 7.91E-03 |
| cg17601843 | 22 | 38302113 | TSS200                    | MICALL1   | -5.573±0.583 | -6.295±0.718 | 1.14E-06 |
| cg03913271 | 22 | 38302504 | GeneBody/1st exon         | MICALL1   | -3.285±0.266 | -3.534±0.301 | 6.97E-05 |
| cg20982583 | 22 | 38349717 | TSS200                    | C22orf23  | -5.616±0.51  | -5.94±0.485  | 3.40E-03 |
| cg14127659 | 22 | 38350784 | TSS1500                   | C22orf23  | 0.367±0.181  | 0.48±0.159   | 3.53E-03 |
| cg15780888 | 22 | 38453087 | TSS200                    | PICK1     | -3.431±0.192 | -3.584±0.369 | 3.77E-03 |
| cg04280397 | 22 | 38578138 | TSS1500                   | PLA2G6    | -4.394±0.421 | -4.668±0.469 | 3.61E-03 |
| cg18652852 | 22 | 38598028 | GeneBody/5'UTR/1st exon   | MAFF      | -4.761±0.436 | -5.038±0.435 | 3.54E-03 |
| cg01346718 | 22 | 38713874 | GeneBody/5'UTR/1st intron | CSNK1E    | -0.898±0.228 | -0.764±0.261 | 8.59E-03 |
| cg20074795 | 22 | 38864244 | GeneBody/1st exon         | KDEL3     | -4.671±0.694 | -5.125±0.63  | 2.40E-03 |
| cg15641675 | 22 | 38902252 | GeneBody/5'UTR/1st exon   | DDX17     | -5.308±0.388 | -5.635±0.367 | 1.70E-04 |
| cg03640568 | 22 | 38902623 | TSS1500                   | DDX17     | -5.098±0.344 | -5.54±0.539  | 1.83E-06 |
| cg20120491 | 22 | 38965934 | GeneBody/1st intron       | DMC1      | -2.885±0.306 | -3.223±0.41  | 1.05E-05 |
| cg16959972 | 22 | 38966785 | TSS1500                   | DMC1      | -3.904±0.367 | -4.175±0.547 | 2.54E-03 |
| cg10423830 | 22 | 39052594 | GeneBody/5'UTR/1st exon   | FAM227A   | -4.068±0.404 | -4.36±0.48   | 1.58E-03 |
| cg05845357 | 22 | 39052748 | GeneBody/5'UTR/1st exon   | CBY1      | -5.252±0.551 | -5.713±0.556 | 2.20E-04 |
| cg01206472 | 22 | 39078311 | GeneBody/1st intron       | TOMM22    | -5.907±0.457 | -6.202±0.472 | 3.39E-03 |
| cg09991975 | 22 | 39096760 | TSS1500                   | JOSD1     | -4.511±0.243 | -4.717±0.343 | 5.33E-04 |
| cg26380756 | 22 | 39097154 | TSS1500                   | JOSD1     | -5.724±0.407 | -6.217±0.564 | 2.70E-06 |
| cg09964005 | 22 | 39101703 | TSS200                    | GTPBP1    | -6.016±0.633 | -6.489±0.62  | 7.33E-04 |
| cg20652889 | 22 | 39151458 | GeneBody/5'UTR/1st exon   | SUN2      | -4.166±0.29  | -4.442±0.431 | 1.53E-04 |
| cg09783309 | 22 | 39190189 | TSS200                    | DNAL4     | -4.918±0.353 | -5.273±0.495 | 5.25E-05 |
| cg09299381 | 22 | 39190195 | TSS200                    | DNAL4     | -4.389±0.349 | -4.784±0.458 | 6.43E-06 |
| cg24649346 | 22 | 39268751 | TSS1500                   | CBX6      | -4.254±0.385 | -4.579±0.371 | 1.76E-04 |
| cg02002676 | 22 | 39378440 | GeneBody/5'UTR/1st exon   | APOBEC3B  | -3.6±0.432   | -4±0.578     | 1.39E-04 |
| cg03804568 | 22 | 39548919 | TSS1500                   | CBX7      | -4.695±0.405 | -5.138±0.496 | 8.86E-06 |
| cg24990612 | 22 | 39641132 | TSS200                    | PDGFB     | -3.452±0.495 | -3.793±0.413 | 1.31E-03 |
| cg21053015 | 22 | 39746054 | GeneBody/1st exon         | SYNGR1    | -4.694±0.685 | -5.431±0.683 | 6.35E-06 |
| cg25556101 | 22 | 39928765 | GeneBody/5'UTR/1st exon   | RPS19BP1  | -5.022±0.384 | -5.334±0.506 | 6.29E-04 |
| cg13785207 | 22 | 39928927 | TSS200                    | RPS19BP1  | -4.837±0.299 | -5.093±0.282 | 1.40E-04 |
| cg08245789 | 22 | 40289538 | GeneBody/5'UTR/1st intron | ENTHD1    | 3.552±0.415  | 3.792±0.427  | 8.05E-03 |
| cg19149454 | 22 | 40742374 | TSS200                    | ADSL      | -5.729±0.502 | -6.064±0.462 | 2.07E-03 |
| cg13430425 | 22 | 40742577 | GeneBody/1st exon         | ADSL      | -4.908±0.368 | -5.255±0.561 | 1.89E-04 |
| cg21422622 | 22 | 40766525 | TSS200                    | SGSM3     | -4.129±0.608 | -4.627±0.553 | 2.26E-04 |
| cg23013931 | 22 | 41214857 | GeneBody/1st intron       | SLC25A17  | -4.426±0.399 | -4.818±0.449 | 3.38E-05 |
| cg03614664 | 22 | 41346948 | TSS1500                   | RBX1      | -5.251±0.314 | -5.431±0.309 | 8.09E-03 |
| cg00500400 | 22 | 41487283 | TSS1500                   | MIR1281   | -4.021±0.249 | -4.237±0.266 | 1.51E-04 |
| cg19961382 | 22 | 41682542 | TSS1500                   | RANGAP1   | -4.427±0.547 | -4.756±0.533 | 5.47E-03 |
| cg21712678 | 22 | 41697701 | GeneBody/5'UTR/1st exon   | ZC3H7B    | -4.855±0.552 | -5.211±0.713 | 5.52E-03 |
| cg04137037 | 22 | 41777896 | TSS200                    | TEF       | -5.621±0.481 | -5.966±0.428 | 9.96E-04 |
| cg11777321 | 22 | 41778547 | GeneBody/1st intron       | TEF       | -4.609±0.362 | -4.897±0.394 | 4.65E-04 |
| cg19448990 | 22 | 41842841 | GeneBody/5'UTR/1st exon   | TOB2      | -4.441±0.232 | -4.585±0.244 | 4.74E-03 |
| cg09416501 | 22 | 41843111 | TSS200                    | TOB2      | -4.167±0.372 | -4.452±0.38  | 6.14E-04 |
| cg08759274 | 22 | 41864680 | GeneBody/5'UTR/1st exon   | PHF5A     | -3.048±0.172 | -3.25±0.27   | 8.87E-06 |
| cg05593780 | 22 | 41864983 | TSS200                    | ACO2      | -4.631±0.436 | -4.955±0.594 | 1.79E-03 |
| cg18174542 | 22 | 41956861 | TSS200                    | CSDC2     | -2.205±0.258 | -2.38±0.32   | 3.15E-03 |
| cg00256281 | 22 | 41985642 | GeneBody/1st intron       | PMM1      | -4.891±0.425 | -5.33±0.521  | 2.10E-05 |
| cg02169098 | 22 | 42017294 | GeneBody/5'UTR/1st exon   | XRCC6     | -4.447±0.608 | -4.881±0.619 | 1.26E-03 |
| cg15801967 | 22 | 42084706 | GeneBody/1st intron       | NHP2L1    | -4.686±0.356 | -4.988±0.339 | 1.58E-04 |
| cg24823993 | 22 | 42085003 | TSS200                    | NHP2L1    | -4.314±0.409 | -4.697±0.61  | 1.85E-04 |
| cg25937494 | 22 | 42228971 | TSS200                    | SREBF2    | -6.199±0.606 | -6.79±0.623  | 3.01E-05 |
| cg11932564 | 22 | 42322146 | GeneBody                  | TNFRSF13C | -3.883±0.446 | -4.14±0.388  | 6.54E-03 |
| cg09869042 | 22 | 42343253 | TSS200                    | CENPM     | -4.761±0.376 | -5.24±0.534  | 1.29E-06 |
| cg04283938 | 22 | 42373298 | GeneBody/1st intron       | 44077     | -3.077±0.282 | -3.264±0.373 | 4.65E-03 |
| cg04733989 | 22 | 42467013 | TSS200                    | NAGA      | -5.402±0.406 | -6.02±0.609  | 5.59E-08 |
| cg07811498 | 22 | 42475450 | TSS1500                   | SMDT1     | -4.191±0.557 | -3.82±0.558  | 2.36E-03 |
| cg20641580 | 22 | 42476080 | GeneBody/1st intron       | SMDT1     | -4.882±0.255 | -5.032±0.285 | 8.32E-03 |
| cg10840135 | 22 | 42526619 | GeneBody/1st exon         | CYP2D6    | 1.84±0.217   | 1.999±0.343  | 3.51E-03 |
| cg11221132 | 22 | 42540342 | GeneBody/1st exon         | CYP2D7P1  | 1.767±0.174  | 1.924±0.235  | 2.01E-04 |
| cg20051177 | 22 | 42612320 | TSS1500                   | TCF20     | 2.55±0.413   | 2.789±0.372  | 6.50E-03 |
| cg14532519 | 22 | 42612642 | TSS1500                   | TCF20     | 2.322±0.183  | 2.434±0.197  | 5.72E-03 |
| cg10864501 | 22 | 43011545 | TSS1500                   | POLDIP3   | -3.123±0.623 | -3.857±0.717 | 2.15E-06 |
| cg00079563 | 22 | 43253521 | TSS200                    | ARFGAP3   | -5.406±0.508 | -5.743±0.548 | 2.88E-03 |
| cg01557667 | 22 | 43411403 | TSS1500                   | PACSIN2   | -5.485±0.517 | -5.897±0.536 | 4.18E-04 |
| cg01892528 | 22 | 43485485 | TSS200                    | TTL1      | -4.958±0.286 | -5.204±0.378 | 3.37E-04 |
| cg10432177 | 22 | 43506591 | TSS200                    | BIK       | -4.293±0.25  | -4.623±0.375 | 8.81E-07 |
| cg15820809 | 22 | 43507369 | GeneBody/5'UTR/1st intron | BIK       | -3.927±0.251 | -4.108±0.458 | 6.79E-03 |
| cg17846100 | 22 | 43538986 | GeneBody/1st exon         | MCAT      | -5.944±0.522 | -6.42±0.699  | 1.64E-04 |
| cg14078309 | 22 | 43539574 | TSS200                    | MCAT      | -4.896±0.295 | -5.423±0.508 | 1.01E-08 |
| cg06110365 | 22 | 43583797 | TSS1500                   | TTL12     | -4.479±0.347 | -4.714±0.373 | 2.42E-03 |

|            |    |          |                           |                  |              |              |          |
|------------|----|----------|---------------------------|------------------|--------------|--------------|----------|
| cg05709923 | 22 | 44351079 | TSS200                    | <i>SAMM50</i>    | -4.198±0.236 | -4.348±0.242 | 3.73E-03 |
| cg00539955 | 22 | 44395433 | GeneBody                  | <i>PARVB</i>     | 1.509±0.225  | 1.371±0.304  | 9.09E-03 |
| cg05064352 | 22 | 45406545 | TSS1500                   | <i>PHF21B</i>    | -3.521±0.513 | -3.906±0.489 | 6.66E-04 |
| cg13438834 | 22 | 45706530 | GeneBody/5'UTR/1st intron | <i>FAM118A</i>   | -4.224±0.296 | -4.485±0.409 | 2.91E-04 |
| cg10226744 | 22 | 46068542 | GeneBody/1st intron       | <i>ATXN10</i>    | -4.768±0.313 | -5.165±0.505 | 2.84E-06 |
| cg08315277 | 22 | 46659398 | TSS200                    | <i>PKDREJ</i>    | 3.753±0.241  | 4.029±0.354  | 9.21E-06 |
| cg22396353 | 22 | 46692687 | GeneBody/5'UTR/1st exon   | <i>GTSE1</i>     | -5.939±0.635 | -6.807±0.674 | 1.25E-07 |
| cg18954434 | 22 | 46692881 | GeneBody/5'UTR/1st intron | <i>GTSE1</i>     | -4.446±0.379 | -4.791±0.812 | 1.83E-03 |
| cg03580876 | 22 | 46731674 | GeneBody/1st exon         | <i>TRMU</i>      | -5.67±0.501  | -6.074±0.635 | 6.06E-04 |
| cg24041977 | 22 | 47133771 | GeneBody/1st intron       | <i>CERK</i>      | -5.084±0.538 | -5.447±0.517 | 1.96E-03 |
| cg05698090 | 22 | 47134664 | TSS1500                   | <i>CERK</i>      | -3.226±0.312 | -3.486±0.344 | 2.79E-04 |
| cg13346032 | 22 | 47158756 | GeneBody/1st intron       | <i>TBC1D22A</i>  | -4.282±0.412 | -4.538±0.383 | 3.99E-03 |
| cg00234961 | 22 | 50246573 | TSS1500                   | <i>ZBED4</i>     | -3.597±0.336 | -3.81±0.499  | 8.90E-03 |
| cg15881727 | 22 | 50248142 | GeneBody/5'UTR/1st intron | <i>ZBED4</i>     | -3.918±0.252 | -4.142±0.451 | 8.55E-04 |
| cg22405555 | 22 | 50311792 | GeneBody/5'UTR/1st intron | <i>ALG12</i>     | -5.778±0.545 | -6.116±0.551 | 4.54E-03 |
| cg17169998 | 22 | 50524124 | GeneBody/5'UTR/1st exon   | <i>MLC1</i>      | -1.391±0.208 | -1.544±0.396 | 6.93E-03 |
| cg18638931 | 22 | 50528179 | TSS1500                   | <i>MOV10L1</i>   | 0.512±0.278  | 0.672±0.286  | 8.36E-03 |
| cg18205517 | 22 | 50624030 | TSS1500                   | <i>TRABD</i>     | -5.204±0.411 | -5.517±0.335 | 4.60E-04 |
| cg19890858 | 22 | 50624742 | GeneBody/5'UTR/1st intron | <i>TRABD</i>     | -4.335±0.453 | -4.788±0.63  | 5.76E-05 |
| cg21028326 | 22 | 50683188 | GeneBody/5'UTR/1st exon   | <i>TUBGCP6</i>   | -4.221±0.511 | -4.582±0.631 | 2.15E-03 |
| cg13686042 | 22 | 50913831 | TSS1500                   | <i>SBF1</i>      | -4.41±0.253  | -4.587±0.297 | 2.11E-03 |
| cg25152348 | 22 | 50946712 | GeneBody/5'UTR/1st exon   | <i>NCAPH2</i>    | -4.798±0.277 | -5.052±0.618 | 2.11E-03 |
| cg11654620 | 22 | 50969039 | TSS1500                   | <i>TYMP</i>      | -5.54±0.401  | -5.88±0.512  | 3.49E-04 |
| cg25575065 | 22 | 51066394 | GeneBody/5'UTR/1st exon   | <i>ARSA</i>      | -3.824±0.281 | -4.108±0.416 | 6.05E-05 |
| cg22122449 | 22 | 51176711 | GeneBody/1st exon         | <i>ACR</i>       | 1.614±0.218  | 1.819±0.287  | 1.05E-04 |
| cg04660617 | 22 | 51222579 | GeneBody/1st intron       | <i>RPL23AP82</i> | -4.842±0.432 | -5.127±0.389 | 2.21E-03 |
| cg22467071 |    |          |                           |                  | -0.255±0.24  | -0.445±0.285 | 5.88E-04 |

<sup>a</sup>Probe IDs for the Infinium HumanMethylation27 BeadChip (Illumina). <sup>b</sup>National Center for Biotechnology Information (NCBI) Database (Genome Build 37). <sup>c</sup>Each probe was annotated as (a) from 200 bp upstream of the transcription start site (TSS) to 1500 bp upstream of it (TSS1500), (b) from TSS to 200 bp upstream of the TSS (TSS200), (c) the 5' untranslated region (UTR), (d) the 1st exon, (e) the 1st intron, and (f) the gene body (2nd exon and downstream) based on the UCSC Genome Browser (<http://genome.ucsc.edu/>).

Supplementary Table 3B. The 5,344 probes showing significant differences of DNA methylation levels in tumorous tissue samples between recurrence-positive and recurrence-negative patients.

| Probe ID <sup>a</sup> | Chromosome | Position <sup>b</sup> | Annotation <sup>c</sup>   | Gene symbol | M-values (mean±SD)           |                              | FDR, q   |
|-----------------------|------------|-----------------------|---------------------------|-------------|------------------------------|------------------------------|----------|
|                       |            |                       |                           |             | Recurrence-negative patients | Recurrence-positive patients |          |
| cg08067365            | 1          | 948893                | GeneBody/5'UTR/1st exon   | ISG15       | -5.085±0.473                 | -5.471±0.677                 | 1.35E-03 |
| cg03322129            | 1          | 1209673               | TSS1500                   | UBE2J2      | -4.241±0.4                   | -4.651±0.487                 | 3.64E-05 |
| cg00262415            | 1          | 1242732               | GeneBody/1st intron       | ACAP3       | -5.092±0.461                 | -5.486±0.591                 | 5.26E-04 |
| cg06038049            | 1          | 1259909               | GeneBody/1st intron       | CPSF3L      | -5.716±0.392                 | -6.177±0.532                 | 6.10E-06 |
| cg10164137            | 1          | 1285239               | TSS1500                   | DVL1        | -4.207±0.323                 | -4.521±0.571                 | 4.69E-04 |
| cg20275133            | 1          | 1342361               | GeneBody                  | MRPL20      | -4.022±0.408                 | -3.715±0.589                 | 3.15E-03 |
| cg09932694            | 1          | 1446840               | TSS1500                   | ATAD3A      | -3.194±0.422                 | -3.559±0.598                 | 6.71E-04 |
| cg05009249            | 1          | 1448132               | GeneBody/5'UTR/1st intron | ATAD3A      | -4.681±0.296                 | -4.982±0.474                 | 1.50E-04 |
| cg05181565            | 1          | 1509872               | GeneBody/1st exon         | SSU72       | -5.75±0.518                  | -6.141±0.638                 | 1.87E-03 |
| cg20755353            | 1          | 1510883               | TSS1500                   | SSU72       | -3.809±0.369                 | -4.068±0.416                 | 3.02E-03 |
| cg01738944            | 1          | 1677273               | GeneBody/5'UTR/1st exon   | SLC35E2     | -4.869±0.311                 | -5.234±0.512                 | 1.81E-05 |
| cg17990871            | 1          | 1677678               | TSS1500                   | SLC35E2     | -4.133±0.558                 | -4.7±0.665                   | 3.91E-05 |
| cg03716942            | 1          | 1821981               | GeneBody/5'UTR/1st intron | GNB1        | -4.339±0.461                 | -4.634±0.48                  | 5.69E-03 |
| cg12150066            | 1          | 1823305               | TSS1500                   | GNB1        | -4.01±0.404                  | -4.293±0.491                 | 3.62E-03 |
| cg21137823            | 1          | 1981270               | TSS1500                   | PRKZ        | -3.58±0.44                   | -3.917±0.569                 | 1.84E-03 |
| cg24649713            | 1          | 2125979               | GeneBody/1st intron       | C1orf86     | -4.464±0.508                 | -4.903±0.679                 | 5.31E-04 |
| cg05940463            | 1          | 2126641               | TSS1500                   | C1orf86     | -4.475±0.301                 | -4.697±0.288                 | 1.36E-03 |
| cg23207616            | 1          | 2322827               | GeneBody/1st intron       | MORN1       | -5.512±0.37                  | -6.125±0.546                 | 9.15E-09 |
| cg13014406            | 1          | 2323870               | GeneBody/5'UTR/1st intron | RER1        | -4.33±0.323                  | -4.607±0.445                 | 6.59E-04 |
| cg23739036            | 1          | 2343736               | GeneBody/1st intron       | PEX10       | -6.147±0.554                 | -6.692±0.608                 | 4.91E-05 |
| cg04716261            | 1          | 2937999               | TSS200                    | ACTRT2      | -1.413±0.351                 | -1.655±0.543                 | 8.28E-03 |
| cg07453618            | 1          | 3541082               | TSS1500                   | TPRG1L      | -6.05±0.566                  | -6.397±0.643                 | 9.56E-03 |
| cg10074513            | 1          | 3541656               | GeneBody/1st exon         | TPRG1L      | -4.908±0.336                 | -5.332±0.618                 | 1.28E-05 |
| cg25762395            | 1          | 3816842               | GeneBody/5'UTR/1st exon   | C1orf174    | -4.928±1.191                 | -6.003±1.015                 | 9.89E-05 |
| cg14303330            | 1          | 6259905               | TSS1500                   | RPL22       | -3.611±0.392                 | -4.099±0.582                 | 3.49E-06 |
| cg21927975            | 1          | 6320757               | GeneBody/5'UTR/1st intron | GPR153      | -4.043±0.356                 | -4.355±0.563                 | 9.16E-04 |
| cg17236617            | 1          | 6454202               | TSS1500                   | ACOT7       | -4.263±0.358                 | -4.494±0.471                 | 8.63E-03 |
| cg25165880            | 1          | 6454326               | TSS1500                   | ACOT7       | -2.656±0.336                 | -3.019±0.519                 | 4.95E-05 |
| cg09143576            | 1          | 6640149               | GeneBody/5'UTR/1st intron | ZBTB48      | -5.187±0.318                 | -5.579±0.613                 | 2.63E-05 |
| cg11688219            | 1          | 6684919               | TSS200                    | THAP3       | -3.804±0.318                 | -4.063±0.535                 | 2.70E-03 |
| cg03630344            | 1          | 7831156               | TSS200                    | VAMP3       | -4.97±0.486                  | -5.406±0.693                 | 4.42E-04 |
| cg06487986            | 1          | 7843564               | TSS1500                   | PER3        | -5.203±0.429                 | -5.503±0.492                 | 3.25E-03 |
| cg17425224            | 1          | 8021250               | TSS1500                   | PARK7       | -3.231±0.508                 | -3.678±0.688                 | 4.74E-04 |
| cg11832727            | 1          | 8877257               | GeneBody/5'UTR/1st exon   | RERE        | -4.426±0.287                 | -4.613±0.309                 | 5.12E-03 |
| cg12711814            | 1          | 8939529               | TSS1500                   | ENO1        | -4.695±0.475                 | -5.008±0.418                 | 3.49E-03 |
| cg23508540            | 1          | 9884032               | GeneBody/5'UTR/1st exon   | CLSTN1      | -4.393±0.36                  | -4.731±0.495                 | 2.17E-04 |
| cg10740965            | 1          | 9969647               | GeneBody/5'UTR/1st intron | CTNNBIP1    | -4.898±0.239                 | -5.263±0.394                 | 1.14E-07 |
| cg27308387            | 1          | 9970993               | TSS1500                   | CTNNBIP1    | -4.039±0.325                 | -4.283±0.43                  | 2.38E-03 |
| cg04413397            | 1          | 10003059              | TSS1500                   | LZIC        | -4.971±0.374                 | -5.355±0.587                 | 1.12E-04 |
| cg23036555            | 1          | 10458832              | TSS1500                   | PGD         | -5.957±0.661                 | -6.428±0.651                 | 2.03E-03 |
| cg14718680            | 1          | 10459268              | GeneBody/1st intron       | PGD         | -4.093±0.324                 | -4.42±0.555                  | 2.46E-04 |
| cg20739510            | 1          | 10534809              | TSS200                    | PEX14       | -3.446±0.548                 | -3.812±0.672                 | 5.74E-03 |
| cg15031780            | 1          | 10535585              | GeneBody/1st intron       | PEX14       | -5.096±0.357                 | -5.372±0.459                 | 1.66E-03 |
| cg15482690            | 1          | 11072742              | GeneBody/5'UTR/1st exon   | TARDBP      | -5.645±0.675                 | -6.209±0.665                 | 3.47E-04 |
| cg06963844            | 1          | 11724238              | GeneBody/5'UTR/1st exon   | FBXO6       | -5.057±0.583                 | -5.551±0.599                 | 3.22E-04 |
| cg07789904            | 1          | 11741841              | TSS1500                   | MAD2L2      | -4.409±0.372                 | -4.681±0.606                 | 6.00E-03 |
| cg20164720            | 1          | 11796063              | TSS200                    | AGTRAP      | -5.166±0.666                 | -5.656±0.65                  | 1.41E-03 |
| cg01226883            | 1          | 11865642              | TSS1500                   | CLCN6       | -4.57±0.224                  | -4.914±0.369                 | 9.67E-08 |
| cg23226134            | 1          | 11866389              | TSS1500                   | MTHFR       | -4.436±0.561                 | -4.81±0.537                  | 3.60E-03 |
| cg04313552            | 1          | 11986714              | TSS1500                   | KIAA2013    | -2.617±0.274                 | -2.835±0.546                 | 6.98E-03 |
| cg05523254            | 1          | 12040215              | TSS200                    | MFN2        | -5.22±0.377                  | -5.59±0.476                  | 8.24E-05 |
| cg09306577            | 1          | 12040877              | GeneBody/5'UTR/1st intron | MFN2        | -4.106±0.305                 | -4.436±0.427                 | 2.89E-05 |
| cg13836770            | 1          | 12226913              | TSS200                    | TNFRSF1B    | -3.882±0.654                 | -4.278±0.607                 | 7.43E-03 |
| cg01346152            | 1          | 12678761              | TSS1500                   | DHRS3       | -3.368±0.457                 | -3.76±0.461                  | 2.71E-04 |
| cg18839416            | 1          | 12805849              | TSS1500                   | C1orf158    | 0.238±0.699                  | -0.288±0.764                 | 1.41E-03 |
| cg24338843            | 1          | 12806667              | GeneBody/1st intron       | C1orf158    | 0.653±0.668                  | 0.082±0.819                  | 4.65E-04 |
| cg09196942            | 1          | 12851619              | GeneBody/5'UTR/1st exon   | PRAMEF1     | 0.853±0.608                  | 0.47±0.687                   | 7.62E-03 |
| cg18807515            | 1          | 12916315              | TSS1500                   | PRAMEF2     | 1.114±0.535                  | 0.524±0.866                  | 5.35E-05 |
| cg03891191            | 1          | 12916998              | GeneBody/5'UTR/1st exon   | PRAMEF2     | 0.924±0.572                  | 0.428±0.768                  | 5.22E-04 |
| cg20375690            | 1          | 15478898              | GeneBody/1st exon         | TMEM51-AS1  | -4.418±0.358                 | -4.768±0.47                  | 9.89E-05 |
| cg24535573            | 1          | 15478961              | TSS200                    | TMEM51-AS1  | -4.152±0.348                 | -4.522±0.452                 | 2.63E-05 |
| cg22269795            | 1          | 15735965              | TSS1500                   | EFHD2       | -5.651±0.547                 | -6.111±0.543                 | 3.30E-04 |
| cg17385448            | 1          | 15911702              | TSS200                    | AGMAT       | -1.124±0.369                 | -1.417±0.496                 | 1.48E-03 |
| cg15500658            | 1          | 16174610              | GeneBody/1st exon         | FLJ37453    | -4.911±0.457                 | -5.346±0.594                 | 1.42E-04 |
| cg27298878            | 1          | 16563398              | GeneBody/5'UTR/1st exon   | RSG1        | -2.606±0.188                 | -2.723±0.201                 | 7.09E-03 |
| cg05588972            | 1          | 16563855              | TSS200                    | RSG1        | -4.09±0.28                   | -4.602±0.414                 | 6.16E-10 |
| cg16011258            | 1          | 16767021              | TSS200                    | NECAP2      | -4.781±0.515                 | -5.293±0.68                  | 8.09E-05 |
| cg07459264            | 1          | 16767326              | GeneBody/1st exon         | NECAP2      | -4.025±0.251                 | -3.794±0.224                 | 8.34E-05 |
| cg12999103            | 1          | 17337842              | GeneBody/1st intron       | ATP13A2     | -3.724±0.222                 | -4.033±0.414                 | 2.15E-06 |
| cg01346589            | 1          | 17765897              | GeneBody/5'UTR/1st intron | RCC2        | -4.386±0.428                 | -4.661±0.513                 | 7.31E-03 |
| cg21243909            | 1          | 17766223              | GeneBody/5'UTR/1st exon   | RCC2        | -4.983±0.382                 | -5.226±0.318                 | 4.47E-03 |
| cg05380570            | 1          | 17866686              | GeneBody/5'UTR/1st intron | ARHGEF10L   | -3.717±0.447                 | -4.177±0.607                 | 5.34E-05 |
| cg14356550            | 1          | 18808102              | GeneBody/1st exon         | KLHDC7A     | -0.496±0.52                  | -0.844±0.723                 | 7.70E-03 |
| cg21728447            | 1          | 19229118              | GeneBody/5'UTR/1st exon   | ALDH4A1     | -4.521±0.324                 | -4.83±0.522                  | 3.65E-04 |
| cg00223950            | 1          | 19536222              | GeneBody/1st intron       | UBR4        | -4.18±0.192                  | -4.318±0.244                 | 3.41E-03 |
| cg15311933            | 1          | 19638897              | GeneBody/5'UTR/1st intron | PQLC2       | -5.278±0.417                 | -5.625±0.522                 | 6.77E-04 |
| cg19976467            | 1          | 20126168              | GeneBody/5'UTR/1st intron | TMCO4       | -4.778±0.451                 | -5.149±0.425                 | 3.82E-04 |
| cg21615127            | 1          | 20126875              | TSS1500                   | TMCO4       | -3.779±0.44                  | -4.17±0.596                  | 4.09E-04 |
| cg00750606            | 1          | 20899121              | 0                         | 0           | 0.233±0.607                  | -0.244±0.778                 | 1.35E-03 |
| cg23993660            | 1          | 20959826              | TSS200                    | PINK1       | -4.185±0.241                 | -4.525±0.383                 | 4.41E-07 |
| cg03218019            | 1          | 20987858              | GeneBody/1st exon         | DDOST       | -3.613±0.615                 | -4.191±0.963                 | 3.77E-04 |
| cg22190291            | 1          | 21766732              | GeneBody/5'UTR/1st exon   | NBPF3       | -5.588±0.59                  | -6.025±0.671                 | 1.83E-03 |
| cg16268051            | 1          | 22379390              | GeneBody/5'UTR/1st intron | CDC42       | -4.84±0.263                  | -5.165±0.549                 | 4.89E-05 |
| cg07180649            | 1          | 22470290              | TSS1500                   | WNT4        | -1.224±0.24                  | -1.364±0.187                 | 8.08E-03 |
| cg15041659            | 1          | 22778527              | GeneBody/5'UTR/1st intron | ZBTB40      | -4.701±0.372                 | -5.014±0.646                 | 2.14E-03 |
| cg11393848            | 1          | 22969340              | TSS1500                   | C1QC        | -1.077±0.363                 | -1.324±0.522                 | 7.45E-03 |
| cg14271400            | 1          | 23036980              | TSS1500                   | EPHB2       | -4.652±0.414                 | -4.976±0.526                 | 1.40E-03 |
| cg06958034            | 1          | 23346203              | GeneBody/1st exon         | KDM1A       | -5.194±0.486                 | -5.518±0.448                 | 3.35E-03 |
| cg00269115            | 1          | 23695530              | GeneBody/1st exon         | C1orf213    | -5.081±0.393                 | -5.4±0.483                   | 8.44E-04 |
| cg22258437            | 1          | 23886007              | GeneBody/5'UTR/1st exon   | ID3         | -5.621±0.526                 | -6.126±0.606                 | 8.16E-05 |
| cg12090388            | 1          | 24018356              | GeneBody/1st intron       | RPL11       | -3.846±0.19                  | -4.032±0.303                 | 2.40E-04 |

|            |   |          |                           |              |              |              |          |
|------------|---|----------|---------------------------|--------------|--------------|--------------|----------|
| cg22983885 | 1 | 24104423 | GeneBody/1st intron       | LOC100506963 | -3.902±0.42  | -4.266±0.452 | 2.71E-04 |
| cg09930410 | 1 | 24127833 | TSS1500                   | GALE         | -5.001±0.62  | -5.602±0.731 | 7.80E-05 |
| cg08673615 | 1 | 24151775 | GeneBody/1st intron       | HMGCL        | -4.196±0.273 | -4.401±0.375 | 2.74E-03 |
| cg18825999 | 1 | 24286530 | GeneBody/5'UTR/1st intron | PNRC2        | -5.125±0.605 | -5.848±0.608 | 1.64E-06 |
| cg15604008 | 1 | 24306982 | TSS200                    | SRSF10       | -4.481±0.486 | -4.797±0.652 | 8.74E-03 |
| cg26991199 | 1 | 24307153 | TSS200                    | SRSF10       | -3.501±0.776 | -3.996±0.756 | 5.31E-03 |
| cg16155382 | 1 | 24646191 | GeneBody/5'UTR/1st exon   | GRHL3        | -3.423±0.384 | -3.76±0.51   | 4.42E-04 |
| cg10698549 | 1 | 24969970 | GeneBody/1st intron       | SRRM1        | -5.2±0.629   | -5.577±0.573 | 7.87E-03 |
| cg18813928 | 1 | 25234506 | GeneBody                  | RUNX3        | 4.455±0.491  | 4.797±0.366  | 1.66E-03 |
| cg08705994 | 1 | 25234649 | GeneBody                  | RUNX3        | 4.417±0.606  | 4.82±0.557   | 3.39E-03 |
| cg22737001 | 1 | 25257029 | TSS1500                   | RUNX3        | -2.172±1.488 | -3.127±1.991 | 9.65E-03 |
| cg12592463 | 1 | 25574236 | TSS1500                   | C1orf63      | -4.534±0.36  | -4.853±0.522 | 5.44E-04 |
| cg13488557 | 1 | 25574588 | TSS1500                   | C1orf63      | -3.628±0.529 | -4.113±0.689 | 2.39E-04 |
| cg21367040 | 1 | 25664857 | GeneBody/5'UTR/1st exon   | TMEM50A      | -5.34±0.443  | -5.839±0.66  | 2.05E-05 |
| cg04722168 | 1 | 26324647 | GeneBody/5'UTR/1st exon   | PAFAH2       | -4.857±0.336 | -5.307±0.505 | 9.38E-07 |
| cg15547662 | 1 | 26324823 | TSS200                    | PAFAH2       | -3.709±0.434 | -4.022±0.505 | 2.50E-03 |
| cg04025590 | 1 | 26560450 | TSS1500                   | CEP85        | -4.992±0.441 | -5.357±0.541 | 6.62E-04 |
| cg14017991 | 1 | 26560780 | GeneBody/5'UTR/1st exon   | CEP85        | -4.57±0.437  | -4.923±0.483 | 6.63E-04 |
| cg03100146 | 1 | 26606846 | GeneBody/1st intron       | SH3BGRL3     | -2.909±0.162 | -3.046±0.223 | 8.45E-04 |
| cg17154022 | 1 | 26798964 | GeneBody/5'UTR/1st exon   | HMGN2        | -4.405±0.517 | -4.756±0.475 | 2.80E-03 |
| cg10971346 | 1 | 27114745 | GeneBody/5'UTR/1st exon   | PIGV         | -4.427±0.327 | -4.638±0.399 | 7.52E-03 |
| cg14333454 | 1 | 27189298 | TSS1500                   | SFN          | -1.008±0.399 | -1.318±0.522 | 1.65E-03 |
| cg23489497 | 1 | 27216793 | GeneBody/5'UTR/1st exon   | GNP2         | -5.148±0.375 | -5.481±0.537 | 5.07E-04 |
| cg16417937 | 1 | 27248012 | TSS200                    | NUDC         | -5.547±0.394 | -5.847±0.453 | 1.45E-03 |
| cg08393541 | 1 | 27248425 | GeneBody/1st intron       | NUDC         | -4.527±0.438 | -4.817±0.516 | 5.69E-03 |
| cg19125999 | 1 | 27287282 | TSS1500                   | C1orf172     | -2.172±0.373 | -2.504±0.586 | 7.38E-04 |
| cg22395192 | 1 | 27339435 | TSS200                    | FAM46B       | -4.908±0.464 | -5.302±0.525 | 3.98E-04 |
| cg21824902 | 1 | 27560832 | TSS200                    | WDC1         | -5.279±0.507 | -5.653±0.607 | 2.16E-03 |
| cg06839953 | 1 | 27648457 | TSS200                    | TMEM222      | -5.482±0.54  | -6.009±0.608 | 5.86E-05 |
| cg23652939 | 1 | 27649000 | GeneBody/1st intron       | TMEM222      | -5.166±0.377 | -5.477±0.564 | 1.42E-03 |
| cg23299127 | 1 | 27693341 | TSS200                    | MAP3K6       | -3.727±0.252 | -3.94±0.372  | 7.65E-03 |
| cg19784449 | 1 | 27816456 | GeneBody/5'UTR/1st intron | WASF2        | -3.87±0.475  | -4.202±0.592 | 3.97E-03 |
| cg14887509 | 1 | 27816781 | TSS200                    | WASF2        | -5.89±0.401  | -6.137±0.361 | 6.31E-03 |
| cg12099357 | 1 | 28052045 | TSS1500                   | FAM76A       | -4.677±0.374 | -5.029±0.641 | 5.71E-04 |
| cg09009042 | 1 | 28157061 | TSS200                    | PPP1R8       | -4.221±0.255 | -4.494±0.368 | 3.72E-05 |
| cg05492605 | 1 | 28157672 | GeneBody/5'UTR/1st exon   | PPP1R8       | -5.345±0.467 | -5.656±0.574 | 5.87E-03 |
| cg11542231 | 1 | 28241192 | GeneBody/5'UTR/1st exon   | RPA2         | -4.974±0.652 | -5.512±0.653 | 4.20E-04 |
| cg22421699 | 1 | 28261367 | TSS200                    | SMPDL3B      | -2.053±0.196 | -2.181±0.231 | 6.35E-03 |
| cg00605270 | 1 | 28261552 | GeneBody/5'UTR/1st exon   | SMPDL3B      | -4.2±0.414   | -4.449±0.415 | 8.66E-03 |
| cg00563229 | 1 | 28286146 | TSS1500                   | XKR8         | -5.253±0.378 | -5.586±0.61  | 9.59E-04 |
| cg19025723 | 1 | 28562708 | GeneBody/1st exon         | ATPIF1       | -4.453±0.379 | -4.872±0.581 | 3.24E-05 |
| cg25973092 | 1 | 28585837 | TSS200                    | SES2         | -4.9±0.362   | -5.217±0.473 | 4.34E-04 |
| cg16013246 | 1 | 28832468 | GeneBody/1st exon         | SNHG3        | -5.108±0.423 | -5.379±0.518 | 8.57E-03 |
| cg24469114 | 1 | 28832988 | GeneBody/5'UTR/1st intron | RCC1         | -4.791±0.389 | -5.063±0.415 | 2.75E-03 |
| cg10691259 | 1 | 28879858 | GeneBody/1st intron       | TRNAU1AP     | -3.382±0.539 | -3.751±0.705 | 5.52E-03 |
| cg20117778 | 1 | 28969554 | GeneBody/5'UTR/1st exon   | TAF12        | -4.872±0.335 | -5.129±0.512 | 3.23E-03 |
| cg23543604 | 1 | 28969705 | TSS200                    | TAF12        | -4.854±0.344 | -5.081±0.322 | 3.72E-03 |
| cg11226328 | 1 | 29213367 | TSS1500                   | EPB41        | -4.607±0.346 | -4.84±0.432  | 5.56E-03 |
| cg18189938 | 1 | 29213863 | GeneBody/5'UTR/1st intron | EPB41        | -6.021±0.368 | -6.361±0.495 | 2.34E-04 |
| cg14195915 | 1 | 29507864 | GeneBody/1st intron       | SRSF4        | -4.574±0.532 | -4.922±0.587 | 5.31E-03 |
| cg05032943 | 1 | 29508776 | TSS200                    | SRSF4        | -3.935±0.35  | -4.235±0.548 | 1.12E-03 |
| cg19112780 | 1 | 29563147 | GeneBody/5'UTR/1st exon   | PTPRU        | -4.932±0.412 | -5.212±0.644 | 9.74E-03 |
| cg13436343 | 1 | 31538432 | GeneBody/5'UTR/1st intron | PUM1         | -5.384±0.321 | -5.749±0.535 | 3.40E-05 |
| cg24710886 | 1 | 31538937 | TSS1500                   | PUM1         | -4.34±0.299  | -4.588±0.553 | 3.32E-03 |
| cg08778586 | 1 | 31769778 | TSS200                    | ZCCHC17      | -4.903±0.389 | -5.246±0.485 | 3.37E-04 |
| cg07652553 | 1 | 31769878 | GeneBody/5'UTR/1st exon   | ZCCHC17      | -4.86±0.392  | -5.199±0.609 | 9.70E-04 |
| cg13299148 | 1 | 32170433 | TSS1500                   | COL16A1      | -3.611±0.481 | -3.944±0.622 | 4.76E-03 |
| cg02286990 | 1 | 32666098 | TSS200                    | CCDC28B      | -3.861±0.563 | -4.251±0.498 | 2.18E-03 |
| cg24137081 | 1 | 32671413 | GeneBody/1st intron       | IQQC         | -5.37±0.338  | -5.703±0.517 | 1.79E-04 |
| cg09327628 | 1 | 32801665 | GeneBody/1st intron       | MARCKSL1     | -4.976±0.437 | -5.237±0.456 | 9.96E-03 |
| cg26131911 | 1 | 33116503 | TSS1500                   | RBBP4        | -5.06±0.28   | -5.466±0.477 | 4.27E-07 |
| cg23150609 | 1 | 33283992 | TSS1500                   | YARS         | -5.852±0.497 | -6.191±0.468 | 2.75E-03 |
| cg27287498 | 1 | 33429490 | GeneBody/1st intron       | RNF19B       | -4.641±0.53  | -4.954±0.502 | 9.34E-03 |
| cg18830459 | 1 | 33429781 | GeneBody/1st exon         | RNF19B       | -6.275±0.488 | -6.768±0.608 | 5.16E-05 |
| cg22189725 | 1 | 33546525 | TSS200                    | ADC          | -3.717±0.474 | -4.103±0.566 | 7.56E-04 |
| cg13263483 | 1 | 35247084 | GeneBody/5'UTR/1st exon   | GJB3         | -3.869±0.276 | -4.121±0.609 | 3.28E-03 |
| cg22459359 | 1 | 35497285 | GeneBody/5'UTR/1st intron | ZMYM6        | -6.184±0.469 | -6.693±0.65  | 2.59E-05 |
| cg15315630 | 1 | 35497506 | GeneBody/5'UTR/1st exon   | ZMYM6        | -5.382±0.339 | -5.698±0.315 | 7.36E-05 |
| cg11730961 | 1 | 35658733 | GeneBody/5'UTR/1st exon   | SFPQ         | -3.469±0.17  | -3.67±0.265  | 1.19E-05 |
| cg21248774 | 1 | 35658951 | TSS1500                   | SFPQ         | -4.961±0.508 | -5.321±0.544 | 2.45E-03 |
| cg19524049 | 1 | 36023720 | GeneBody/5'UTR/1st intron | NCDN         | -5.188±0.396 | -5.464±0.517 | 4.78E-03 |
| cg14308291 | 1 | 36396265 | TSS1500                   | AGO3         | -4.088±0.558 | -4.485±0.593 | 2.31E-03 |
| cg24547948 | 1 | 36554901 | GeneBody/1st intron       | ADPRHL2      | -4.827±0.452 | -5.225±0.589 | 4.00E-04 |
| cg19046959 | 1 | 36565856 | TSS200                    | COL8A2       | -3.148±0.445 | -3.49±0.453  | 9.87E-04 |
| cg16705481 | 1 | 36615026 | GeneBody/5'UTR/1st exon   | TRAPPC3      | -4.933±0.651 | -5.613±0.712 | 2.01E-05 |
| cg11916186 | 1 | 36689760 | TSS1500                   | THRAP3       | -4.582±0.31  | -4.904±0.486 | 1.00E-04 |
| cg07789552 | 1 | 36851195 | GeneBody/5'UTR/1st intron | STK40        | -3.409±0.219 | -3.557±0.292 | 6.44E-03 |
| cg01773061 | 1 | 36863007 | GeneBody/5'UTR/1st intron | LSM10        | -4.836±0.396 | -5.109±0.55  | 6.00E-03 |
| cg08198370 | 1 | 36930120 | TSS200                    | MRPS15       | -4.793±0.266 | -5.159±0.459 | 1.47E-06 |
| cg00728398 | 1 | 37980699 | TSS1500                   | MEAF6        | -5.855±0.561 | -6.361±0.552 | 1.30E-04 |
| cg26624273 | 1 | 38019894 | GeneBody/5'UTR/1st exon   | SNIP1        | -4.597±0.317 | -5.023±0.509 | 1.37E-06 |
| cg12696750 | 1 | 38022466 | TSS200                    | DNAL1        | -3.423±0.606 | -3.803±0.414 | 4.02E-03 |
| cg06528936 | 1 | 38061398 | GeneBody/1st exon         | GNL2         | -5.342±0.379 | -5.704±0.415 | 7.47E-05 |
| cg26649834 | 1 | 38156051 | GeneBody/5'UTR/1st exon   | C1orf109     | -5.514±0.387 | -5.767±0.408 | 5.09E-03 |
| cg16341373 | 1 | 38157962 | TSS200                    | CDCA8        | -3.951±0.374 | -4.191±0.466 | 8.18E-03 |
| cg08735298 | 1 | 38273312 | TSS200                    | C1orf122     | -4.417±0.397 | -4.731±0.538 | 1.58E-03 |
| cg18333824 | 1 | 38455588 | GeneBody/1st exon         | SF3A3        | -4.938±0.272 | -5.219±0.481 | 2.11E-04 |
| cg25682936 | 1 | 38455768 | TSS200                    | SF3A3        | -2.384±0.19  | -2.556±0.226 | 1.98E-04 |
| cg23495059 | 1 | 39324743 | GeneBody/1st intron       | RRAGC        | -4.844±0.479 | -5.262±0.535 | 2.65E-04 |
| cg12792157 | 1 | 39339004 | GeneBody/5'UTR/1st exon   | MYCBP        | -5.694±0.465 | -6.154±0.509 | 4.48E-05 |
| cg00521598 | 1 | 39339413 | TSS1500                   | MYCBP        | -3.663±0.415 | -4.005±0.531 | 8.12E-04 |
| cg16918585 | 1 | 39492570 | GeneBody/5'UTR/1st intron | NDUFS5       | -4.629±0.447 | -4.955±0.595 | 3.30E-03 |
| cg01656955 | 1 | 40137966 | TSS1500                   | NT5C1A       | -2.453±0.726 | -2.871±0.475 | 7.80E-03 |
| cg08063724 | 1 | 40367097 | GeneBody                  | MYCL         | -4.936±0.446 | -5.247±0.531 | 3.65E-03 |
| cg09182986 | 1 | 40505999 | TSS1500                   | CAP1         | -4.244±0.354 | -4.487±0.397 | 3.64E-03 |

|            |   |          |                           |                 |              |              |          |
|------------|---|----------|---------------------------|-----------------|--------------|--------------|----------|
| cg25568243 | 1 | 40974465 | GeneBody/5'UTR/1st exon   | <i>EXO5</i>     | -5.47±0.578  | -5.965±0.889 | 1.04E-03 |
| cg06211871 | 1 | 40997551 | GeneBody/5'UTR/1st intron | <i>ZNF684</i>   | -4.297±0.736 | -4.782±0.569 | 2.96E-03 |
| cg13730534 | 1 | 41157553 | TSS200                    | <i>NFYC</i>     | -3.916±0.229 | -4.113±0.271 | 3.93E-04 |
| cg02668729 | 1 | 41445680 | GeneBody/5'UTR/1st intron | <i>CTPS1</i>    | -5.225±0.422 | -5.537±0.465 | 1.77E-03 |
| cg14550007 | 1 | 41707370 | GeneBody/5'UTR/1st intron | <i>SCMH1</i>    | -6.261±0.598 | -6.898±0.692 | 1.73E-05 |
| cg20757758 | 1 | 42922000 | TSS200                    | <i>ZMYND12</i>  | -4.938±0.34  | -5.292±0.489 | 5.70E-05 |
| cg17994910 | 1 | 42948516 | 0                         | 0               | 0.355±0.377  | 0.097±0.476  | 5.62E-03 |
| cg02150709 | 1 | 43123922 | TSS200                    | <i>PPIH</i>     | -5.154±0.579 | -5.584±0.557 | 1.24E-03 |
| cg17330200 | 1 | 43282561 | TSS1500                   | <i>ERMAP</i>    | -4.314±0.385 | -4.737±0.66  | 7.18E-05 |
| cg01782487 | 1 | 43283185 | TSS200                    | <i>CCDC23</i>   | -4.266±0.398 | -4.542±0.547 | 5.50E-03 |
| cg19552482 | 1 | 43312486 | GeneBody/5'UTR/1st intron | <i>ZNF691</i>   | -4.613±0.595 | -5.02±0.601  | 3.12E-03 |
| cg16725097 | 1 | 43637592 | GeneBody                  | <i>EBNA1BP2</i> | -4.341±0.41  | -4.719±0.556 | 2.54E-04 |
| cg13342625 | 1 | 43638094 | GeneBody/5'UTR/1st exon   | <i>WDR65</i>    | -5.246±0.447 | -5.711±0.538 | 2.77E-05 |
| cg01651593 | 1 | 43824241 | TSS1500                   | <i>CDC20</i>    | -4.75±0.397  | -5.092±0.526 | 5.42E-04 |
| cg03793131 | 1 | 43833547 | TSS200                    | <i>ELOVL1</i>   | -4.619±0.579 | -5.029±0.564 | 2.08E-03 |
| cg07299462 | 1 | 43855490 | TSS200                    | <i>MED8</i>     | -5.522±0.496 | -6.072±0.663 | 1.58E-05 |
| cg10968649 | 1 | 44115804 | GeneBody/5'UTR/1st exon   | <i>KDM4A</i>    | -5.686±0.461 | -6.086±0.505 | 2.81E-04 |
| cg08552254 | 1 | 44115979 | GeneBody/5'UTR/1st intron | <i>KDM4A</i>    | -2.091±0.488 | -1.711±0.656 | 1.77E-03 |
| cg02361363 | 1 | 44173578 | GeneBody/1st intron       | <i>ST3GAL3</i>  | -4.896±0.245 | -5.076±0.251 | 1.56E-03 |
| cg17771854 | 1 | 44412679 | GeneBody/5'UTR/1st exon   | <i>IPO13</i>    | -5.244±0.371 | -5.673±0.64  | 3.32E-05 |
| cg19903333 | 1 | 44441367 | GeneBody/1st intron       | <i>ATP6V0B</i>  | -3.484±0.378 | -3.012±0.419 | 9.58E-07 |
| cg04323187 | 1 | 44457159 | TSS200                    | <i>CCDC24</i>   | -5.435±0.528 | -5.937±0.595 | 8.57E-05 |
| cg20975478 | 1 | 44457319 | GeneBody/5'UTR/1st exon   | <i>CCDC24</i>   | -3.169±0.226 | -3.356±0.279 | 6.73E-04 |
| cg18937321 | 1 | 44497024 | GeneBody/1st exon         | <i>SLC6A9</i>   | -4.63±0.364  | -4.85±0.392  | 9.80E-03 |
| cg02890926 | 1 | 45140355 | TSS200                    | <i>C1orf228</i> | -5.866±0.584 | -6.337±0.592 | 5.62E-04 |
| cg07550267 | 1 | 45241824 | TSS1500                   | <i>SNORD46</i>  | -4.328±0.653 | -4.906±0.612 | 1.54E-04 |
| cg00904574 | 1 | 45265678 | TSS1500                   | <i>PLK3</i>     | -4.746±0.34  | -5.2±0.623   | 4.30E-06 |
| cg03229887 | 1 | 45452240 | GeneBody/5'UTR/1st exon   | <i>EIF2B3</i>   | -4.684±0.349 | -5.067±0.52  | 3.08E-05 |
| cg22920538 | 1 | 45476463 | GeneBody/1st intron       | <i>HECTD3</i>   | -4.605±0.323 | -4.921±0.423 | 1.00E-04 |
| cg10797195 | 1 | 45805338 | TSS200                    | <i>TOE1</i>     | -3.565±0.27  | -3.821±0.347 | 1.46E-04 |
| cg25827112 | 1 | 45956773 | GeneBody/5'UTR/1st exon   | <i>TESK2</i>    | -4.859±0.749 | -5.343±0.417 | 2.72E-03 |
| cg26294850 | 1 | 46645697 | GeneBody/5'UTR/1st intron | <i>TSPAN1</i>   | -3.612±0.313 | -3.854±0.555 | 5.26E-03 |
| cg03262773 | 1 | 46712613 | TSS1500                   | <i>RAD54L</i>   | -2.971±0.61  | -2.49±0.608  | 6.85E-04 |
| cg26601286 | 1 | 46806355 | TSS1500                   | <i>NSUN4</i>    | -5.628±0.456 | -5.907±0.476 | 8.25E-03 |
| cg15305343 | 1 | 46806357 | TSS1500                   | <i>NSUN4</i>    | -6.263±0.496 | -6.791±0.689 | 3.53E-05 |
| cg15445332 | 1 | 47069792 | GeneBody/5'UTR/1st intron | <i>MKNK1</i>    | -5.377±0.403 | -5.778±0.476 | 5.36E-05 |
| cg23786576 | 1 | 47133596 | GeneBody/1st intron       | <i>ATPAF1</i>   | -4.813±0.31  | -5.003±0.291 | 7.04E-03 |
| cg00128766 | 1 | 47185216 | TSS1500                   | <i>EFCAB14</i>  | -3.025±0.351 | -3.302±0.461 | 1.41E-03 |
| cg13158571 | 1 | 47489195 | TSS200                    | <i>CYP4X1</i>   | -2.982±0.459 | -3.294±0.48  | 3.48E-03 |
| cg18885999 | 1 | 47799311 | TSS200                    | <i>CMPK1</i>    | -4.833±0.284 | -5.039±0.468 | 6.56E-03 |
| cg20623943 | 1 | 47799834 | GeneBody/1st intron       | <i>CMPK1</i>    | -5.28±0.323  | -5.628±0.489 | 4.47E-05 |
| cg04141379 | 1 | 48938046 | TSS200                    | <i>SPATA6</i>   | -5.427±0.507 | -5.809±0.597 | 1.71E-03 |
| cg01145389 | 1 | 51433840 | TSS1500                   | <i>CDKN2C</i>   | -5.007±0.466 | -5.367±0.467 | 8.81E-04 |
| cg10450322 | 1 | 51434373 | GeneBody/5'UTR/1st exon   | <i>CDKN2C</i>   | -3.701±0.371 | -4.06±0.519  | 1.50E-04 |
| cg05923103 | 1 | 51701583 | TSS1500                   | <i>RNF11</i>    | -4.643±0.34  | -4.98±0.412  | 5.85E-05 |
| cg10089324 | 1 | 51984752 | GeneBody/1st intron       | <i>EPS15</i>    | -2.851±0.167 | -3.036±0.249 | 2.57E-05 |
| cg14407667 | 1 | 51985209 | TSS1500                   | <i>EPS15</i>    | -4.231±0.44  | -4.566±0.481 | 1.27E-03 |
| cg12688215 | 1 | 52499228 | GeneBody/1st exon         | <i>KTH2</i>     | -6.106±0.423 | -6.496±0.733 | 7.93E-04 |
| cg02917972 | 1 | 53018259 | GeneBody/5'UTR/1st intron | <i>ZCCHC11</i>  | -4.498±0.442 | -4.916±0.45  | 7.16E-05 |
| cg13461509 | 1 | 53387576 | TSS200                    | <i>ECHDC2</i>   | -4.782±0.427 | -5.123±0.439 | 6.49E-04 |
| cg01100796 | 1 | 53662040 | TSS200                    | <i>CPT2</i>     | -2.41±0.556  | -2.884±0.649 | 4.04E-04 |
| cg10321208 | 1 | 53662243 | GeneBody/5'UTR/1st exon   | <i>CPT2</i>     | -3.989±0.445 | -4.314±0.549 | 2.56E-03 |
| cg21849289 | 1 | 53686523 | TSS1500                   | <i>C1orf123</i> | -5.567±0.462 | -5.881±0.442 | 2.95E-03 |
| cg11841758 | 1 | 53704358 | TSS200                    | <i>MAGO1</i>    | -4.035±0.296 | -4.229±0.323 | 5.33E-03 |
| cg02502132 | 1 | 53792939 | GeneBody/1st intron       | <i>LRP8</i>     | -5.573±0.304 | -5.78±0.473  | 9.27E-03 |
| cg13262752 | 1 | 54355695 | TSS1500                   | <i>YIPF1</i>    | -3.824±0.39  | -4.085±0.536 | 7.64E-03 |
| cg19400876 | 1 | 54411017 | GeneBody/5'UTR/1st intron | <i>HSPB11</i>   | -4.736±0.442 | -5.184±0.515 | 3.84E-05 |
| cg08388746 | 1 | 54518349 | GeneBody/1st intron       | <i>TMEM59</i>   | -2.438±0.589 | -2.816±0.62  | 5.76E-03 |
| cg10362426 | 1 | 54518856 | GeneBody/1st exon         | <i>TMEM59</i>   | -3.217±0.284 | -3.433±0.34  | 1.57E-03 |
| cg04853151 | 1 | 54519244 | TSS200                    | <i>TCEANC2</i>  | -3.047±0.289 | -3.256±0.306 | 1.92E-03 |
| cg22813220 | 1 | 54519286 | GeneBody/5'UTR/1st exon   | <i>TCEANC2</i>  | -5.113±0.594 | -5.75±0.629  | 1.16E-05 |
| cg02239021 | 1 | 54665433 | GeneBody/5'UTR/1st intron | <i>CYB5RL</i>   | -4.544±0.323 | -4.761±0.28  | 2.82E-03 |
| cg14314795 | 1 | 55181614 | GeneBody/1st exon         | <i>TTC4</i>     | -5.291±0.474 | -5.683±0.464 | 3.81E-04 |
| cg10322308 | 1 | 55229957 | GeneBody/5'UTR/1st intron | <i>PARS2</i>    | -5.123±0.488 | -5.418±0.505 | 9.00E-03 |
| cg18014844 | 1 | 55230402 | TSS200                    | <i>PARS2</i>    | -4.551±0.287 | -4.901±0.42  | 4.80E-06 |
| cg05494069 | 1 | 57111499 | GeneBody/1st intron       | <i>PRKAA2</i>   | -3.72±0.381  | -4.006±0.536 | 2.92E-03 |
| cg19213569 | 1 | 59762605 | TSS200                    | <i>FGGY</i>     | -3.973±0.38  | -4.371±0.383 | 1.53E-05 |
| cg17393296 | 1 | 59762829 | GeneBody/1st intron       | <i>FGGY</i>     | -5.098±0.443 | -5.381±0.466 | 5.95E-03 |
| cg20289988 | 1 | 61547758 | TSS1500                   | <i>NFIA</i>     | -3.884±0.253 | -4.211±0.35  | 1.18E-06 |
| cg14850026 | 1 | 62660191 | TSS1500                   | <i>L1TD1</i>    | 1.663±0.319  | 1.907±0.495  | 3.36E-03 |
| cg03370542 | 1 | 63249606 | TSS200                    | <i>ATG4C</i>    | -3.33±0.652  | -3.782±0.698 | 3.39E-03 |
| cg18464559 | 1 | 63989278 | GeneBody/5'UTR/1st exon   | <i>EFCAB7</i>   | -5.667±0.544 | -6.009±0.553 | 6.45E-03 |
| cg25013852 | 1 | 64058941 | TSS200                    | <i>PGM1</i>     | -5.142±0.511 | -5.456±0.54  | 8.16E-03 |
| cg05210526 | 1 | 64059049 | GeneBody/5'UTR/1st exon   | <i>PGM1</i>     | -5.416±0.5   | -5.727±0.516 | 7.19E-03 |
| cg15364303 | 1 | 64239391 | TSS1500                   | <i>ROR1</i>     | -3.716±0.436 | -4.058±0.389 | 6.18E-04 |
| cg02755455 | 1 | 65352382 | GeneBody/5'UTR/1st intron | <i>JAK1</i>     | 2.001±0.29   | 2.173±0.29   | 9.77E-03 |
| cg21655790 | 1 | 65886077 | TSS200                    | <i>LEPROT</i>   | -2.48±0.637  | -2.87±0.555  | 6.29E-03 |
| cg06894381 | 1 | 67519805 | GeneBody/5'UTR/1st exon   | <i>SLC35D1</i>  | -4.685±0.276 | -4.923±0.273 | 2.39E-04 |
| cg07000785 | 1 | 68150823 | TSS200                    | <i>GADD45A</i>  | -3.581±0.186 | -3.788±0.271 | 2.13E-05 |
| cg12986021 | 1 | 68516627 | TSS200                    | <i>DIRAS3</i>   | -0.195±0.451 | -0.489±0.561 | 7.08E-03 |
| cg08413469 | 1 | 68962940 | TSS200                    | <i>DEPDC1</i>   | -4.861±0.497 | -5.167±0.442 | 6.33E-03 |
| cg10576828 | 1 | 70225863 | GeneBody/5'UTR/1st exon   | <i>LRRC7</i>    | 2.212±0.65   | 1.756±0.879  | 4.76E-03 |
| cg16666456 | 1 | 70671441 | GeneBody/5'UTR/1st exon   | <i>SRSF11</i>   | -5.495±0.513 | -5.935±0.532 | 2.86E-04 |
| cg21032203 | 1 | 71546840 | GeneBody/5'UTR/1st exon   | <i>ZRANB2</i>   | -4.243±0.491 | -4.635±0.516 | 6.66E-04 |
| cg26855724 | 1 | 75198818 | TSS200                    | <i>TYW3</i>     | -5±0.539     | -5.365±0.608 | 4.10E-03 |
| cg26752657 | 1 | 75199075 | GeneBody/5'UTR/1st exon   | <i>CRYZ</i>     | -4.694±0.453 | -5.014±0.434 | 2.08E-03 |
| cg05467918 | 1 | 76189945 | TSS200                    | <i>ACADM</i>    | -4.865±0.422 | -5.519±0.732 | 1.29E-07 |
| cg27478651 | 1 | 76190428 | GeneBody/5'UTR/1st exon   | <i>ACADM</i>    | -5.364±0.386 | -5.753±0.556 | 9.40E-05 |
| cg04940515 | 1 | 76251865 | TSS200                    | <i>RABGGTB</i>  | -5.033±0.616 | -5.613±0.661 | 8.78E-05 |
| cg09458394 | 1 | 76251976 | GeneBody/1st intron       | <i>RABGGTB</i>  | -4.472±0.605 | -4.94±0.592  | 8.18E-04 |
| cg1829211  | 1 | 77685015 | GeneBody/1st exon         | <i>PIGK</i>     | -5.19±0.345  | -5.459±0.305 | 6.28E-04 |
| cg04127303 | 1 | 78148267 | GeneBody/5'UTR/1st intron | <i>ZZZ3</i>     | -4.317±0.353 | -4.668±0.547 | 1.67E-04 |
| cg20695562 | 1 | 78225636 | TSS200                    | <i>USP33</i>    | -4.147±0.33  | -4.38±0.318  | 2.07E-03 |
| cg24022301 | 1 | 78956570 | TSS200                    | <i>PTGFR</i>    | -2.516±0.963 | -3.097±0.711 | 5.93E-03 |
| cg21280384 | 1 | 84945307 | GeneBody/1st intron       | <i>RPF1</i>     | -4.371±0.467 | -4.784±0.603 | 3.67E-04 |

|            |   |           |                           |                     |              |              |          |
|------------|---|-----------|---------------------------|---------------------|--------------|--------------|----------|
| cg11227541 | 1 | 84972317  | TSS200                    | <i>GNG5</i>         | -4.403±0.488 | -4.77±0.469  | 1.09E-03 |
| cg08380539 | 1 | 85039702  | GeneBody/1st intron       | <i>CTBS</i>         | -4.598±0.517 | -5.029±0.466 | 2.95E-04 |
| cg23142964 | 1 | 85156566  | TSS1500                   | <i>SSX2IP</i>       | -5.739±0.393 | -6.093±0.522 | 3.32E-04 |
| cg10515956 | 1 | 85514610  | TSS1500                   | <i>MCOLN3</i>       | -3.14±0.549  | -3.523±0.48  | 2.05E-03 |
| cg14322224 | 1 | 85931226  | TSS1500                   | <i>DDAH1</i>        | -1.558±0.417 | -1.861±0.598 | 4.31E-03 |
| cg06833562 | 1 | 86174060  | GeneBody/5'UTR/1st exon   | <i>ZNHIT6</i>       | -5.07±0.56   | -5.459±0.585 | 2.82E-03 |
| cg17455591 | 1 | 87379840  | GeneBody/5'UTR/1st exon   | <i>44089</i>        | -3.794±0.303 | -4.021±0.404 | 2.48E-03 |
| cg19976011 | 1 | 87380779  | GeneBody/1st exon         | <i>HS2ST1</i>       | -5.437±0.51  | -5.811±0.521 | 1.59E-03 |
| cg14540297 | 1 | 87597473  | TSS200                    | <i>LOC339524</i>    | -4.001±0.256 | -4.217±0.366 | 9.92E-04 |
| cg16228804 | 1 | 89150099  | GeneBody/5'UTR/1st exon   | <i>PKN2</i>         | -4.71±0.297  | -4.918±0.44  | 6.23E-03 |
| cg04270788 | 1 | 89356964  | GeneBody/1st intron       | <i>GTF2B</i>        | -4.513±0.377 | -4.957±0.518 | 6.31E-06 |
| cg02705666 | 1 | 89357418  | TSS200                    | <i>GTF2B</i>        | -4.824±0.53  | -5.378±0.617 | 2.32E-05 |
| cg05946081 | 1 | 89458035  | GeneBody/5'UTR/1st intron | <i>CCBL2</i>        | -5.25±0.661  | -5.666±0.579 | 5.13E-03 |
| cg22074858 | 1 | 89488430  | GeneBody/5'UTR/1st exon   | <i>GBP3</i>         | -3.179±0.793 | -3.747±0.662 | 1.48E-03 |
| cg11208880 | 1 | 90287278  | TSS1500                   | <i>LRRCD8</i>       | -5.34±0.408  | -5.742±0.506 | 7.21E-05 |
| cg03863149 | 1 | 91487516  | GeneBody/5'UTR/1st intron | <i>ZNFB44</i>       | -5.047±0.497 | -5.521±0.591 | 9.84E-05 |
| cg08552999 | 1 | 91487806  | GeneBody/5'UTR/1st exon   | <i>ZNFB44</i>       | -4.308±0.45  | -4.592±0.449 | 6.08E-03 |
| cg13599025 | 1 | 91966361  | TSS200                    | <i>CDC7</i>         | -4.218±0.395 | -4.533±0.598 | 2.03E-03 |
| cg22622495 | 1 | 91966418  | GeneBody/5'UTR/1st exon   | <i>CDC7</i>         | -5.208±0.645 | -5.873±0.697 | 2.31E-05 |
| cg27016863 | 1 | 91966490  | GeneBody/5'UTR/1st exon   | <i>CDC7</i>         | -4.674±0.343 | -5.118±0.543 | 2.39E-06 |
| cg05027081 | 1 | 91966616  | TSS200                    | <i>CDC7</i>         | -5.13±0.423  | -5.519±0.666 | 5.13E-04 |
| cg16382382 | 1 | 92351047  | GeneBody/5'UTR/1st intron | <i>TGFBFR3</i>      | -5.707±0.729 | -6.267±0.738 | 9.61E-04 |
| cg26580095 | 1 | 92545650  | TSS1500                   | <i>BTBD8</i>        | -1.399±0.381 | -1.743±0.565 | 4.85E-04 |
| cg21024391 | 1 | 92764898  | TSS1500                   | <i>GLMN</i>         | -4.718±0.372 | -5.077±0.54  | 1.87E-04 |
| cg07054788 | 1 | 93297504  | TSS200                    | <i>RPL5</i>         | -4.696±0.334 | -4.923±0.473 | 7.25E-03 |
| cg07387450 | 1 | 93646168  | GeneBody/1st exon         | <i>TMED5</i>        | -5.608±0.53  | -6.075±0.48  | 2.29E-04 |
| cg02421543 | 1 | 93810826  | GeneBody/1st intron       | <i>LOC100131564</i> | -3.423±0.423 | -3.768±0.457 | 5.59E-04 |
| cg05684015 | 1 | 93811877  | GeneBody/5'UTR/1st exon   | <i>DR1</i>          | -4.99±0.484  | -5.378±0.513 | 6.51E-04 |
| cg16833230 | 1 | 94344337  | GeneBody/1st intron       | <i>DNTTIP2</i>      | -4.818±0.334 | -5.139±0.476 | 1.85E-04 |
| cg24215727 | 1 | 94883469  | TSS1500                   | <i>ABCD3</i>        | -4.314±0.398 | -4.616±0.47  | 1.58E-03 |
| cg09869791 | 1 | 94884541  | GeneBody/1st intron       | <i>ABCD3</i>        | -3.84±0.378  | -4.294±0.422 | 1.86E-06 |
| cg22424108 | 1 | 95285531  | TSS1500                   | <i>SLC44A3</i>      | -2.849±0.389 | -3.156±0.561 | 1.94E-03 |
| cg02718725 | 1 | 95392925  | TSS200                    | <i>CNN3</i>         | -3.648±0.57  | -4.011±0.579 | 5.69E-03 |
| cg08721347 | 1 | 95538652  | TSS200                    | <i>ALG14</i>        | -4.736±0.367 | -5.01±0.531  | 3.38E-03 |
| cg19514928 | 1 | 95583636  | GeneBody/5'UTR/1st exon   | <i>MEM56-RWDD</i>   | -4.541±0.403 | -4.829±0.486 | 3.02E-03 |
| cg04185893 | 1 | 97187305  | GeneBody/5'UTR/1st exon   | <i>PTBP2</i>        | -5.377±0.552 | -5.812±0.609 | 8.66E-04 |
| cg08462292 | 1 | 97188168  | GeneBody/1st intron       | <i>PTBP2</i>        | -4.878±0.443 | -5.279±0.576 | 2.74E-04 |
| cg06990379 | 1 | 98386209  | GeneBody/1st intron       | <i>DPYD</i>         | -5.459±0.731 | -5.987±0.516 | 1.10E-03 |
| cg14453641 | 1 | 100315326 | TSS1500                   | <i>AGL</i>          | -4.253±0.501 | -4.66±0.473  | 4.36E-04 |
| cg06426831 | 1 | 100435258 | TSS200                    | <i>SLC35A3</i>      | -3.315±0.412 | -3.585±0.505 | 6.72E-03 |
| cg26091119 | 1 | 100503820 | GeneBody/1st exon         | <i>HIAT1</i>        | -5.278±0.499 | -5.624±0.346 | 1.66E-03 |
| cg14766198 | 1 | 100818374 | GeneBody/5'UTR/1st exon   | <i>CDC14A</i>       | -5.069±0.386 | -5.333±0.507 | 5.60E-03 |
| cg06565684 | 1 | 101360112 | GeneBody/5'UTR/1st intron | <i>EXTL2</i>        | -3.626±0.39  | -3.864±0.435 | 9.63E-03 |
| cg05612904 | 1 | 101491636 | TSS1500                   | <i>DPH5</i>         | -5.121±0.355 | -5.334±0.339 | 8.42E-03 |
| cg09214920 | 1 | 108743318 | TSS1500                   | <i>SLC25A24</i>     | -4.021±0.632 | -4.412±0.469 | 4.92E-03 |
| cg22949637 | 1 | 109234813 | TSS200                    | <i>PRPF38B</i>      | -4.674±0.249 | -5.091±0.421 | 1.84E-08 |
| cg00712898 | 1 | 109235208 | GeneBody/1st exon         | <i>PRPF38B</i>      | -5.727±0.532 | -6.214±0.677 | 2.26E-04 |
| cg26357241 | 1 | 109289876 | GeneBody/1st intron       | <i>STXBP3</i>       | -8.824±0.395 | -4.198±0.533 | 1.72E-04 |
| cg01969748 | 1 | 109420034 | GeneBody/5'UTR/1st intron | <i>GPSM2</i>        | -5.767±0.615 | -6.246±0.598 | 7.63E-04 |
| cg22063056 | 1 | 109505929 | GeneBody/5'UTR/1st intron | <i>CLCC1</i>        | -5.069±0.428 | -5.49±0.633  | 1.54E-04 |
| cg16345880 | 1 | 109756737 | GeneBody/1st exon         | <i>SARS</i>         | -3.597±0.18  | -3.75±0.292  | 1.50E-03 |
| cg27014642 | 1 | 109791839 | TSS1500                   | <i>CELSR2</i>       | -4.424±0.404 | -4.787±0.431 | 1.73E-04 |
| cg06752594 | 1 | 109825964 | TSS200                    | <i>PSRC1</i>        | -5.845±0.479 | -6.253±0.646 | 6.63E-04 |
| cg10087399 | 1 | 109940029 | GeneBody/1st intron       | <i>SORT1</i>        | -3.786±0.482 | -4.117±0.461 | 2.67E-03 |
| cg11286163 | 1 | 109969161 | TSS200                    | <i>PSMA5</i>        | -5.313±0.472 | -5.689±0.483 | 6.58E-04 |
| cg00630249 | 1 | 110036889 | GeneBody/1st exon         | <i>CYB561D1</i>     | -5.115±0.329 | -5.379±0.283 | 4.49E-04 |
| cg13878641 | 1 | 110090951 | TSS1500                   | <i>GNAI3</i>        | -4.861±0.751 | -5.319±0.646 | 6.37E-03 |
| cg15955341 | 1 | 110198890 | GeneBody/5'UTR/1st exon   | <i>GSTM4</i>        | -4.98±0.821  | -5.505±0.755 | 4.78E-03 |
| cg24326142 | 1 | 110453144 | TSS200                    | <i>CSF1</i>         | -4.503±0.559 | -4.845±0.519 | 6.85E-03 |
| cg12020639 | 1 | 110527249 | TSS200                    | <i>AHCYL1</i>       | -5.135±0.406 | -5.391±0.424 | 6.71E-03 |
| cg03152785 | 1 | 110753723 | GeneBody/5'UTR/1st exon   | <i>KCNK4</i>        | -5.536±0.641 | -6.108±0.693 | 1.91E-04 |
| cg25416363 | 1 | 110881820 | TSS200                    | <i>LOC440600</i>    | -4.34±0.445  | -4.638±0.443 | 3.57E-03 |
| cg20097268 | 1 | 110950612 | TSS200                    | <i>LAMTOR5</i>      | -4.535±0.308 | -4.856±0.461 | 7.14E-05 |
| cg23874078 | 1 | 111682148 | TSS200                    | <i>CEPT1</i>        | -3.616±0.548 | -4.047±0.597 | 8.75E-04 |
| cg22780428 | 1 | 111682262 | GeneBody/5'UTR/1st exon   | <i>CEPT1</i>        | -2.895±0.335 | -3.168±0.58  | 2.92E-03 |
| cg04763192 | 1 | 111889241 | GeneBody/5'UTR/1st exon   | <i>PIFO</i>         | -5.289±0.421 | -5.764±0.545 | 1.00E-05 |
| cg11735358 | 1 | 111991797 | GeneBody/5'UTR/1st exon   | <i>WDR77</i>        | -5.725±0.465 | -6.144±0.641 | 3.76E-04 |
| cg27284019 | 1 | 112298042 | TSS200                    | <i>DDX20</i>        | -4.203±0.357 | -4.58±0.527  | 5.61E-05 |
| cg00160914 | 1 | 112299263 | TSS1500                   | <i>FAM212B</i>      | -2.056±0.387 | -2.348±0.454 | 1.64E-03 |
| cg10841258 | 1 | 112938518 | TSS1500                   | <i>CTTNBP2NL</i>    | -2.699±0.496 | -2.323±0.583 | 1.55E-03 |
| cg20648108 | 1 | 112939192 | GeneBody/5'UTR/1st intron | <i>CTTNBP2NL</i>    | -4.693±0.409 | -4.946±0.35  | 5.67E-03 |
| cg04057053 | 1 | 113008926 | TSS1500                   | <i>WNT2B</i>        | -5.748±0.562 | -6.091±0.503 | 6.80E-03 |
| cg16743781 | 1 | 113249654 | GeneBody/5'UTR/1st exon   | <i>RHOC</i>         | -5.295±0.426 | -5.82±0.631  | 4.14E-06 |
| cg04828892 | 1 | 113258366 | TSS1500                   | <i>PPM1J</i>        | -5.535±0.526 | -6.016±0.551 | 1.26E-04 |
| cg21539243 | 1 | 114301432 | GeneBody/5'UTR/1st exon   | <i>PHF1</i>         | -4.571±0.638 | -5.051±0.571 | 6.99E-04 |
| cg23933345 | 1 | 114447334 | GeneBody/1st exon         | <i>AP4B1</i>        | -4.395±0.3   | -4.805±0.478 | 8.95E-07 |
| cg21943652 | 1 | 114472049 | GeneBody/5'UTR/1st exon   | <i>HIPK1</i>        | -5.518±0.371 | -5.797±0.517 | 2.78E-03 |
| cg21666217 | 1 | 115053421 | GeneBody/1st exon         | <i>TRIM33</i>       | -5.696±0.494 | -6.204±0.687 | 6.14E-05 |
| cg20932765 | 1 | 115054143 | TSS1500                   | <i>TRIM33</i>       | -3.75±0.498  | -4.18±0.648  | 4.96E-04 |
| cg19234509 | 1 | 115124245 | GeneBody/5'UTR/1st exon   | <i>BCAS2</i>        | -5.035±0.654 | -5.717±0.772 | 2.56E-05 |
| cg23141333 | 1 | 115212619 | GeneBody/5'UTR/1st exon   | <i>DENND2C</i>      | -4.413±0.371 | -4.673±0.565 | 7.04E-03 |
| cg00209951 | 1 | 115212834 | TSS200                    | <i>DENND2C</i>      | -2.917±0.293 | -3.246±0.47  | 3.38E-05 |
| cg07068998 | 1 | 115259668 | TSS200                    | <i>NRAS</i>         | -3.909±0.271 | -4.141±0.556 | 4.14E-03 |
| cg08166982 | 1 | 115300440 | GeneBody/5'UTR/1st intron | <i>CSDE1</i>        | -4.189±0.302 | -4.463±0.395 | 2.71E-04 |
| cg10125119 | 1 | 115300850 | TSS200                    | <i>CSDE1</i>        | -3.68±0.65   | -4.186±0.686 | 9.12E-04 |
| cg19432434 | 1 | 115323269 | GeneBody/1st exon         | <i>SIKE1</i>        | -5.063±0.476 | -5.42±0.478  | 1.21E-03 |
| cg08339208 | 1 | 115323327 | TSS200                    | <i>SIKE1</i>        | -5.323±0.27  | -5.703±0.456 | 7.62E-07 |
| cg17696091 | 1 | 115396629 | TSS1500                   | <i>SYCP1</i>        | 1.91±0.489   | 1.541±0.727  | 3.43E-03 |
| cg18087477 | 1 | 115397597 | GeneBody/5'UTR/1st exon   | <i>SYCP1</i>        | 0.57±0.32    | 0.797±0.536  | 8.57E-03 |
| cg08157638 | 1 | 116194194 | GeneBody                  | <i>VANGL1</i>       | 2.441±0.368  | 2.667±0.295  | 5.67E-03 |
| cg09580336 | 1 | 116915122 | TSS1500                   | <i>ATP1A1</i>       | -2.26±0.523  | -2.583±0.556 | 7.98E-03 |
| cg14841875 | 1 | 116916411 | TSS200                    | <i>ATP1A1</i>       | -3.305±0.301 | -3.577±0.689 | 4.56E-03 |
| cg12205047 | 1 | 117209954 | TSS1500                   | <i>IGSF3</i>        | -4.751±0.411 | -5.134±0.449 | 1.03E-04 |
| cg03752628 | 1 | 117453510 | GeneBody/1st intron       | <i>PTGFRN</i>       | -1.208±0.404 | -1.587±0.664 | 4.86E-04 |
| cg12641660 | 1 | 117602129 | TSS1500                   | <i>TTF2</i>         | -4.954±0.612 | -5.41±0.614  | 1.30E-03 |

|            |   |           |                           |                 |              |              |          |
|------------|---|-----------|---------------------------|-----------------|--------------|--------------|----------|
| cg13221588 | 1 | 117603102 | GeneBody                  | <i>TTF2</i>     | -4.586±0.443 | -4.961±0.596 | 7.23E-04 |
| cg02614187 | 1 | 117664089 | GeneBody/5'UTR/1st exon   | <i>TRIM45</i>   | -3.25±0.38   | -3.574±0.468 | 4.75E-04 |
| cg23828212 | 1 | 117910371 | GeneBody/5'UTR/1st exon   | <i>MAN1A2</i>   | -5.581±0.521 | -5.996±0.445 | 4.77E-04 |
| cg14545899 | 1 | 118149019 | GeneBody/5'UTR/1st intron | <i>FAM46C</i>   | -5.311±0.445 | -5.721±0.527 | 1.60E-04 |
| cg14915165 | 1 | 118471929 | GeneBody/5'UTR/1st intron | <i>GDAP2</i>    | -4.656±0.364 | -4.93±0.29   | 7.95E-04 |
| cg07518362 | 1 | 120611593 | GeneBody/1st intron       | <i>NOTCH2</i>   | -5.441±0.429 | -5.809±0.484 | 3.40E-04 |
| cg02963198 | 1 | 145209830 | GeneBody/5'UTR/1st intron | <i>NOTCH2NL</i> | -5.099±0.37  | -5.454±0.463 | 1.06E-04 |
| cg19389852 | 1 | 145439013 | GeneBody/1st exon         | <i>TXNIP</i>    | -3.016±0.705 | -3.576±0.656 | 5.71E-04 |
| cg19413110 | 1 | 145470355 | GeneBody/5'UTR/1st exon   | <i>POLR3GL</i>  | -4.025±0.316 | -3.671±0.364 | 7.50E-06 |
| cg21332946 | 1 | 145476871 | TSS1500                   | <i>LIX1L</i>    | -5.512±0.685 | -5.96±0.672  | 4.33E-03 |
| cg03418289 | 1 | 145477137 | GeneBody/5'UTR/1st exon   | <i>LIX1L</i>    | -5.632±0.908 | -6.186±0.542 | 4.64E-03 |
| cg15611923 | 1 | 145507416 | TSS200                    | <i>RBM8A</i>    | -4.186±0.317 | -4.434±0.488 | 2.72E-03 |
| cg06804431 | 1 | 145516254 | GeneBody/5'UTR/1st exon   | <i>PEX11B</i>   | -4.743±0.606 | -5.229±0.641 | 6.55E-04 |
| cg11246695 | 1 | 145576023 | GeneBody/5'UTR/1st exon   | <i>PIAS3</i>    | -5.773±0.613 | -6.416±0.656 | 1.71E-05 |
| cg05795157 | 1 | 145576107 | GeneBody/1st intron       | <i>PIAS3</i>    | -4.289±0.386 | -4.722±0.67  | 5.52E-05 |
| cg14367344 | 1 | 146644336 | TSS200                    | <i>PRKAB2</i>   | -5.672±0.526 | -5.986±0.426 | 7.16E-03 |
| cg10735116 | 1 | 147400532 | GeneBody/5'UTR/1st exon   | <i>GPR89B</i>   | -5.45±0.5    | -5.948±0.597 | 5.35E-05 |
| cg09588210 | 1 | 147932603 | TSS1500                   | <i>FLJ39739</i> | -1.913±0.346 | -2.182±0.337 | 7.69E-04 |
| cg09866173 | 1 | 149832789 | TSS200                    | <i>HIST2H4B</i> | -5.59±0.601  | -6.17±0.593  | 4.96E-05 |
| cg09065135 | 1 | 149882836 | TSS200                    | <i>OTUD7B</i>   | -4.701±0.342 | -4.926±0.382 | 5.20E-03 |
| cg01385430 | 1 | 150039081 | TSS1500                   | <i>VPS45</i>    | -5.293±0.457 | -5.571±0.454 | 7.84E-03 |
| cg11512771 | 1 | 150479487 | TSS1500                   | <i>ECM1</i>     | 3.239±0.729  | 2.721±0.839  | 2.80E-03 |
| cg01139966 | 1 | 150669796 | TSS200                    | <i>GOLPH3L</i>  | -4.622±0.62  | -5.058±0.791 | 4.04E-03 |
| cg05669980 | 1 | 150849174 | GeneBody/5'UTR/1st exon   | <i>ARNT</i>     | -5.305±0.485 | -5.588±0.388 | 8.37E-03 |
| cg04082985 | 1 | 150946396 | GeneBody/5'UTR/1st intron | <i>CERS2</i>    | -4.202±0.338 | -4.427±0.47  | 7.90E-03 |
| cg26288160 | 1 | 151020733 | GeneBody/1st exon         | <i>C1orf56</i>  | -4.622±0.255 | -4.882±0.391 | 1.14E-04 |
| cg17002259 | 1 | 151032260 | GeneBody/5'UTR/1st exon   | <i>MLL11</i>    | -5.166±0.359 | -5.436±0.344 | 1.09E-03 |
| cg10124491 | 1 | 151042967 | TSS200                    | <i>GABPB2</i>   | -4.865±0.597 | -5.328±0.636 | 9.73E-04 |
| cg15827295 | 1 | 151138583 | GeneBody/5'UTR/1st exon   | <i>SCNM1</i>    | -5.248±0.507 | -5.584±0.518 | 4.08E-03 |
| cg07668036 | 1 | 151227536 | GeneBody/1st intron       | <i>PSMD4</i>    | -4.714±0.445 | -5.011±0.423 | 3.49E-03 |
| cg08927489 | 1 | 151254500 | TSS1500                   | <i>ZNF687</i>   | -4.674±0.358 | -5.001±0.516 | 3.59E-04 |
| cg15691841 | 1 | 151255071 | GeneBody/5'UTR/1st intron | <i>ZNF687</i>   | -4.986±0.33  | -5.265±0.368 | 3.97E-04 |
| cg22736107 | 1 | 151371972 | TSS200                    | <i>PSMB4</i>    | -4.93±0.423  | -5.333±0.589 | 1.85E-04 |
| cg20077393 | 1 | 151483425 | TSS1500                   | <i>CGN</i>      | -4.741±0.288 | -4.966±0.38  | 1.62E-03 |
| cg00368415 | 1 | 151584398 | TSS1500                   | <i>SNX27</i>    | -5.21±0.336  | -5.588±0.5   | 2.08E-05 |
| cg14269514 | 1 | 151736130 | TSS200                    | <i>MRPL9</i>    | -4.675±0.276 | -4.984±0.408 | 2.24E-05 |
| cg07017477 | 1 | 151882157 | GeneBody/5'UTR/1st exon   | <i>THEM4</i>    | -3.309±0.336 | -3.529±0.378 | 5.68E-03 |
| cg12052258 | 1 | 152009284 | GeneBody/1st intron       | <i>S100A11</i>  | -4.496±0.355 | -4.83±0.44   | 1.40E-04 |
| cg23110514 | 1 | 152538888 | GeneBody/5'UTR/1st intron | <i>LCE3E</i>    | 0.178±0.834  | -0.337±0.954 | 9.17E-03 |
| cg03741352 | 1 | 152573450 | GeneBody/1st exon         | <i>LCE3C</i>    | 0.934±0.59   | 0.564±0.729  | 9.56E-03 |
| cg00406188 | 1 | 152647216 | TSS1500                   | <i>LCE2C</i>    | 1.242±0.634  | 0.809±0.923  | 7.46E-03 |
| cg25098401 | 1 | 152658407 | TSS200                    | <i>LCE2B</i>    | 0.052±0.655  | -0.4±0.743   | 3.62E-03 |
| cg21754343 | 1 | 152658797 | GeneBody/5'UTR/1st intron | <i>LCE2B</i>    | 1.061±0.87   | 0.514±1.099  | 9.80E-03 |
| cg21846488 | 1 | 152680843 | TSS1500                   | <i>LCE4A</i>    | 0.003±0.699  | -0.501±0.949 | 3.83E-03 |
| cg21065959 | 1 | 152758755 | GeneBody/5'UTR/1st exon   | <i>LCE1E</i>    | 0.697±0.434  | 0.219±0.713  | 5.21E-05 |
| cg24304714 | 1 | 152779374 | TSS1500                   | <i>LCE1C</i>    | -1.303±0.44  | -1.571±0.484 | 9.27E-03 |
| cg05440289 | 1 | 152881119 | GeneBody/5'UTR/1st intron | <i>IVL</i>      | 1.162±1.095  | 0.42±1.15    | 3.61E-03 |
| cg08555657 | 1 | 153068231 | TSS1500                   | <i>SPRR2E</i>   | 1.368±0.617  | 0.887±0.831  | 1.75E-03 |
| cg19836808 | 1 | 153432916 | GeneBody/5'UTR/1st intron | <i>S100A7</i>   | -2.64±0.553  | -3.066±0.748 | 2.04E-03 |
| cg26894575 | 1 | 153518054 | GeneBody/5'UTR/1st intron | <i>S100A4</i>   | -2.242±0.872 | -2.795±0.727 | 4.48E-03 |
| cg07688613 | 1 | 153700021 | TSS1500                   | <i>INTS3</i>    | -3.787±0.331 | -4.046±0.452 | 1.75E-03 |
| cg19490266 | 1 | 153949898 | GeneBody/5'UTR/1st exon   | <i>JTB</i>      | -5.067±0.274 | -5.558±0.44  | 1.50E-09 |
| cg16915794 | 1 | 153959086 | TSS1500                   | <i>RAB13</i>    | -4.479±0.484 | -4.874±0.559 | 6.63E-04 |
| cg12402495 | 1 | 154192844 | GeneBody/5'UTR/1st intron | <i>UBAP2L</i>   | -5.787±0.386 | -6.089±0.51  | 1.57E-03 |
| cg01628253 | 1 | 154244960 | TSS200                    | <i>HAX1</i>     | -4.656±0.413 | -4.911±0.486 | 9.78E-03 |
| cg08008562 | 1 | 154530682 | GeneBody/1st intron       | <i>UBE2Q1</i>   | -4.877±0.487 | -5.258±0.529 | 9.30E-04 |
| cg09311052 | 1 | 154531418 | TSS1500                   | <i>UBE2Q1</i>   | -5.695±0.486 | -6.239±0.555 | 9.05E-06 |
| cg25816468 | 1 | 154928408 | GeneBody/5'UTR/1st intron | <i>PBXIP1</i>   | -4.886±0.396 | -5.248±0.446 | 1.54E-04 |
| cg01277844 | 1 | 154934734 | TSS1500                   | <i>PYGO2</i>    | -4.429±0.321 | -4.673±0.359 | 1.37E-03 |
| cg06418219 | 1 | 154948305 | GeneBody/1st intron       | <i>CKS1B</i>    | -4.413±0.562 | -4.853±0.77  | 1.76E-03 |
| cg01366407 | 1 | 154955991 | GeneBody/5'UTR/1st exon   | <i>FLAD1</i>    | -4.7±0.305   | -4.897±0.342 | 6.06E-03 |
| cg12530270 | 1 | 155005172 | GeneBody                  | <i>DCST2</i>    | 3.238±0.187  | 3.37±0.285   | 6.82E-03 |
| cg05813084 | 1 | 155051569 | GeneBody/1st intron       | <i>EFGA3</i>    | -4.699±0.4   | -4.986±0.464 | 2.63E-03 |
| cg23916948 | 1 | 155108399 | GeneBody/1st exon         | <i>SLC50A1</i>  | -5.532±0.536 | -5.972±0.518 | 4.11E-04 |
| cg07399355 | 1 | 155163013 | TSS1500                   | <i>MUC1</i>     | -4.084±0.369 | -4.452±0.411 | 4.39E-05 |
| cg06420088 | 1 | 155163590 | TSS1500                   | <i>MUC1</i>     | -3.006±0.213 | -3.347±0.344 | 3.45E-08 |
| cg12543649 | 1 | 155176868 | GeneBody/1st intron       | <i>THBS3</i>    | -4.595±0.361 | -4.84±0.396  | 3.90E-03 |
| cg06237414 | 1 | 155178670 | GeneBody/1st exon         | <i>MTX1</i>     | -4.273±0.379 | -4.59±0.367  | 3.41E-04 |
| cg17319849 | 1 | 155214564 | GeneBody/5'UTR/1st exon   | <i>GBA</i>      | -5.319±0.436 | -5.679±0.485 | 5.46E-04 |
| cg03985657 | 1 | 155225128 | GeneBody/5'UTR/1st exon   | <i>FAM189B</i>  | -5.035±0.617 | -5.612±0.698 | 1.12E-04 |
| cg14550101 | 1 | 155247361 | GeneBody/1st exon         | <i>HCN3</i>     | -5.012±0.354 | -5.347±0.508 | 2.30E-04 |
| cg15470750 | 1 | 155278344 | TSS200                    | <i>FDPS</i>     | -4.146±0.419 | -4.446±0.605 | 4.90E-03 |
| cg17038116 | 1 | 155533405 | TSS1500                   | <i>ASH1L</i>    | -3.969±0.438 | -4.409±0.715 | 2.00E-04 |
| cg27114086 | 1 | 155658701 | GeneBody/5'UTR/1st intron | <i>YY1AP1</i>   | -5.033±0.341 | -5.263±0.382 | 4.19E-03 |
| cg20969242 | 1 | 155827044 | TSS200                    | <i>GON4L</i>    | -4.154±0.631 | -4.996±0.846 | 5.47E-07 |
| cg05321960 | 1 | 155904084 | GeneBody/1st intron       | <i>KIAA0907</i> | -3.671±0.724 | -4.118±0.695 | 6.79E-03 |
| cg06821274 | 1 | 155990882 | TSS200                    | <i>SSR2</i>     | -4.565±0.36  | -4.882±0.563 | 8.36E-04 |
| cg16907075 | 1 | 156022875 | GeneBody/1st intron       | <i>UBQLN4</i>   | -3.327±0.497 | -3.692±0.614 | 2.47E-03 |
| cg24502084 | 1 | 156024674 | GeneBody/5'UTR/1st exon   | <i>LAMTOR2</i>  | -4.414±0.269 | -4.613±0.459 | 6.61E-03 |
| cg04317543 | 1 | 156084516 | GeneBody/5'UTR/1st exon   | <i>LMNA</i>     | -5.489±0.53  | -5.857±0.566 | 3.02E-03 |
| cg14171523 | 1 | 156163644 | TSS200                    | <i>SLC25A44</i> | -5.147±0.404 | -5.476±0.409 | 4.95E-04 |
| cg08763433 | 1 | 156252438 | GeneBody/1st exon         | <i>SMG5</i>     | -6.272±0.438 | -6.594±0.451 | 1.58E-03 |
| cg22377142 | 1 | 156265275 | GeneBody/1st intron       | <i>C1orf85</i>  | -4.155±0.541 | -4.533±0.589 | 2.93E-03 |
| cg18667426 | 1 | 156265552 | TSS200                    | <i>C1orf85</i>  | -4.397±0.363 | -4.676±0.534 | 2.70E-03 |
| cg03989569 | 1 | 156471288 | TSS1500                   | <i>MEF2D</i>    | -5.367±0.423 | -5.694±0.402 | 7.91E-04 |
| cg09822001 | 1 | 156561334 | TSS1500                   | <i>APOA1BP</i>  | -4.311±0.431 | -4.834±0.571 | 2.98E-06 |
| cg03218909 | 1 | 156589008 | TSS200                    | <i>HAPLN2</i>   | -2.167±0.357 | -2.404±0.38  | 4.57E-03 |
| cg06106793 | 1 | 156736771 | TSS1500                   | <i>PRCC</i>     | -4.69±0.333  | -4.916±0.344 | 3.49E-03 |
| cg25017304 | 1 | 157015118 | GeneBody/5'UTR/1st exon   | <i>ARHGEF11</i> | -3.105±0.241 | -3.28±0.329  | 3.58E-03 |
| cg03955296 | 1 | 157107917 | GeneBody/5'UTR/1st intron | <i>ETV3</i>     | -3.859±0.304 | -4.062±0.442 | 8.79E-03 |
| cg25119415 | 1 | 158799933 | TSS1500                   | <i>MNDA</i>     | 0.497±0.868  | -0.135±1.074 | 2.71E-03 |
| cg10663017 | 1 | 159750305 | TSS1500                   | <i>DUSP23</i>   | -4.359±0.517 | -4.682±0.593 | 8.30E-03 |
| cg08661227 | 1 | 159895006 | GeneBody/5'UTR/1st intron | <i>TAGLN2</i>   | -5.995±0.484 | -6.493±0.649 | 5.17E-05 |
| cg04197051 | 1 | 160001439 | GeneBody/1st exon         | <i>PIGM</i>     | -5.585±0.451 | -5.958±0.519 | 5.59E-04 |
| cg12701576 | 1 | 160254608 | GeneBody/1st intron       | <i>PEX19</i>    | -5.035±0.589 | -5.466±0.611 | 1.70E-03 |

|            |   |            |                           |           |              |              |          |
|------------|---|------------|---------------------------|-----------|--------------|--------------|----------|
| cg27497900 | 1 | 160312163  | TSS1500                   | NCSTN     | -4.312±0.362 | -4.677±0.567 | 1.45E-04 |
| cg13298382 | 1 | 161087635  | TSS1500                   | NIT1      | -4.58±0.311  | -5.027±0.493 | 3.29E-07 |
| cg00397740 | 1 | 161136321  | GeneBody/5'UTR/1st exon   | PPOX      | -4.138±0.354 | -4.388±0.471 | 4.43E-03 |
| cg23779106 | 1 | 1611719820 | GeneBody/1st exon         | DUSP12    | -6.043±0.473 | -6.362±0.628 | 6.37E-03 |
| cg26591879 | 1 | 161736013  | TSS200                    | ATF6      | -3.464±0.482 | -3.891±0.563 | 2.59E-04 |
| cg07924819 | 1 | 161736104  | GeneBody/5'UTR/1st exon   | ATF6      | -4.623±0.331 | -4.888±0.425 | 1.11E-03 |
| cg16604136 | 1 | 163291493  | GeneBody/5'UTR/1st exon   | RGS5      | -5.53±0.589  | -5.991±0.626 | 8.73E-04 |
| cg15778350 | 1 | 163291775  | GeneBody/5'UTR/1st exon   | NUF2      | -4.595±0.395 | -5.003±0.522 | 4.45E-05 |
| cg24489237 | 1 | 164529170  | GeneBody/1st exon         | PBX1      | -3.206±0.302 | -3.422±0.334 | 2.45E-03 |
| cg27477594 | 1 | 165600170  | GeneBody/5'UTR/1st exon   | MGST3     | -4.916±0.402 | -5.279±0.502 | 2.53E-04 |
| cg11373746 | 1 | 165668181  | GeneBody/1st intron       | LOC440700 | -3.545±0.39  | -3.839±0.588 | 3.63E-03 |
| cg15781625 | 1 | 165796654  | TSS200                    | UCK2      | -4.836±0.432 | -5.252±0.679 | 2.80E-04 |
| cg09527021 | 1 | 166845374  | GeneBody/1st intron       | TADA1     | -4.512±0.261 | -4.846±0.501 | 1.34E-05 |
| cg11459822 | 1 | 166845928  | TSS1500                   | TADA1     | -4.288±0.314 | -4.494±0.44  | 9.38E-03 |
| cg08348962 | 1 | 166944393  | GeneBody/1st intron       | ILDR2     | -3.757±0.589 | -4.222±0.566 | 6.55E-04 |
| cg06665322 | 1 | 167059365  | GeneBody/1st intron       | GPA33     | 1.782±0.594  | 1.351±0.923  | 5.54E-03 |
| cg21182322 | 1 | 167189623  | TSS1500                   | POU2F1    | -4.069±0.272 | -4.376±0.531 | 1.20E-04 |
| cg19001490 | 1 | 167190240  | GeneBody/1st intron       | POU2F1    | -3.008±0.372 | -3.26±0.41   | 4.01E-03 |
| cg19220586 | 1 | 167522470  | GeneBody/1st intron       | CREG1     | -4.441±0.486 | -4.81±0.486  | 1.07E-03 |
| cg14046986 | 1 | 167599371  | TSS200                    | RCSL1     | -4.402±1.302 | -5.191±1.158 | 6.98E-03 |
| cg03001647 | 1 | 167691881  | GeneBody/1st intron       | MPZL1     | -3.849±0.472 | -4.159±0.67  | 9.36E-03 |
| cg08412305 | 1 | 167904990  | GeneBody/1st exon         | MPC2      | -5.194±0.328 | -5.626±0.567 | 3.40E-06 |
| cg25219134 | 1 | 167906865  | TSS1500                   | MPC2      | -4.245±0.461 | -4.558±0.655 | 7.29E-03 |
| cg12739647 | 1 | 168195558  | GeneBody/1st intron       | SFT2D2    | -5.646±0.442 | -5.929±0.521 | 7.24E-03 |
| cg26628634 | 1 | 169337140  | GeneBody/5'UTR/1st exon   | NME7      | -4.449±0.425 | -4.731±0.374 | 3.26E-03 |
| cg13912204 | 1 | 169455529  | TSS1500                   | SLC19A2   | -5.25±0.543  | -5.685±0.556 | 6.20E-04 |
| cg24597988 | 1 | 169681749  | TSS1500                   | SELL      | 1.952±0.32   | 2.152±0.299  | 6.46E-03 |
| cg26023751 | 1 | 169763990  | GeneBody/5'UTR/1st exon   | METTL18   | -5.7±0.384   | -5.943±0.413 | 6.58E-03 |
| cg23051655 | 1 | 169862721  | GeneBody/5'UTR/1st intron | SCYL3     | -5.031±0.505 | -5.375±0.515 | 3.27E-03 |
| cg10753582 | 1 | 170043676  | GeneBody/5'UTR/1st exon   | KIFAP3    | -4.091±0.214 | -4.383±0.327 | 7.27E-07 |
| cg06625811 | 1 | 170044077  | TSS200                    | KIFAP3    | -4.97±0.543  | -5.367±0.72  | 3.16E-03 |
| cg22068764 | 1 | 170501645  | GeneBody/1st intron       | GORAB     | -4.786±0.401 | -5.175±0.452 | 6.68E-05 |
| cg11594415 | 1 | 171454668  | GeneBody/5'UTR/1st exon   | PRRC2C    | -5.768±0.597 | -6.203±0.676 | 2.16E-03 |
| cg01653110 | 1 | 171711841  | TSS1500                   | VAMP4     | -4.23±0.705  | -4.808±0.723 | 4.77E-04 |
| cg11584111 | 1 | 172412837  | GeneBody/5'UTR/1st intron | PIGC      | -4.156±0.242 | -4.392±0.38  | 2.31E-04 |
| cg20442709 | 1 | 172501557  | TSS1500                   | SUCO      | -4.978±0.744 | -5.546±0.716 | 9.26E-04 |
| cg24241455 | 1 | 173683938  | TSS200                    | KLHL20    | -4.651±0.286 | -4.923±0.438 | 2.90E-04 |
| cg26001030 | 1 | 174128297  | TSS1500                   | RABGAP1L  | -5.019±0.456 | -5.406±0.431 | 2.61E-04 |
| cg25335775 | 1 | 174992314  | GeneBody/1st intron       | MRPS14    | -3.977±0.398 | -4.415±0.444 | 8.77E-06 |
| cg21076470 | 1 | 174992744  | TSS200                    | MRPS14    | -4.619±0.555 | -5.029±0.682 | 2.28E-03 |
| cg01095590 | 1 | 175161785  | GeneBody/5'UTR/1st exon   | KIAA0040  | -5.185±0.534 | -5.648±0.471 | 1.77E-04 |
| cg10331038 | 1 | 175376028  | GeneBody/5'UTR            | TNR       | 1.041±0.67   | 0.241±0.936  | 5.49E-06 |
| cg08643928 | 1 | 178694481  | GeneBody/5'UTR/1st exon   | RALGPS2   | -5.286±0.411 | -5.739±0.6   | 2.56E-05 |
| cg27403822 | 1 | 179050983  | TSS200                    | TOR3A     | -4.387±0.353 | -4.654±0.454 | 2.12E-03 |
| cg12118011 | 1 | 179263295  | GeneBody/5'UTR/1st intron | SOAT1     | -3.966±0.294 | -4.228±0.607 | 2.96E-03 |
| cg23045073 | 1 | 179545458  | TSS1500                   | NPHS2     | -2.669±0.559 | -3.068±0.735 | 3.82E-03 |
| cg03115649 | 1 | 179851535  | GeneBody/5'UTR/1st exon   | TOR1AIP1  | -6.143±0.598 | -6.662±0.72  | 3.56E-04 |
| cg17286491 | 1 | 179923514  | TSS1500                   | CEP350    | -4.192±0.45  | -4.583±0.554 | 3.76E-04 |
| cg25478157 | 1 | 179924306  | GeneBody/5'UTR/1st intron | CEP350    | -5.566±0.364 | -5.89±0.368  | 1.61E-04 |
| cg26750139 | 1 | 180471249  | GeneBody/1st exon         | ACBD6     | -5.647±0.596 | -6.07±0.532  | 1.76E-03 |
| cg00223186 | 1 | 180472200  | TSS200                    | ACBD6     | -4.68±0.416  | -5.091±0.497 | 6.19E-05 |
| cg08638395 | 1 | 180601032  | TSS200                    | XPR1      | -5.032±0.329 | -5.35±0.422  | 1.12E-04 |
| cg03565782 | 1 | 181057814  | GeneBody/5'UTR/1st exon   | IER5      | -6.352±0.531 | -6.819±0.652 | 3.29E-04 |
| cg17892328 | 1 | 182360794  | TSS1500                   | GLUL      | -4.42±1.136  | -5.075±0.896 | 8.93E-03 |
| cg23735442 | 1 | 183441292  | TSS200                    | SMG7-AS1  | -4.654±0.363 | -4.898±0.499 | 7.25E-03 |
| cg02105034 | 1 | 183441865  | GeneBody/5'UTR/1st intron | SMG7      | -4.557±0.269 | -4.733±0.331 | 6.90E-03 |
| cg20271396 | 1 | 184020713  | TSS200                    | TSEN15    | -4.931±0.329 | -5.126±0.323 | 9.85E-03 |
| cg18772361 | 1 | 184723253  | GeneBody/1st intron       | EDEM3     | -5.349±0.407 | -5.612±0.42  | 5.29E-03 |
| cg19921776 | 1 | 184724497  | TSS1500                   | EDEM3     | -5.154±0.455 | -5.432±0.439 | 7.25E-03 |
| cg26542888 | 1 | 185014264  | TSS1500                   | RNF2      | -4.316±0.711 | -4.784±0.577 | 3.18E-03 |
| cg23335946 | 1 | 185125966  | GeneBody/5'UTR/1st exon   | TRMT1L    | -4.612±0.297 | -4.794±0.289 | 7.36E-03 |
| cg25423402 | 1 | 185286075  | GeneBody/5'UTR/1st intron | IVNS1ABP  | -6.043±1.04  | -6.69±0.821  | 4.99E-03 |
| cg20041381 | 1 | 186344125  | GeneBody/1st exon         | TPR       | -4.296±0.314 | -4.719±0.403 | 3.70E-07 |
| cg18335243 | 1 | 186649519  | GeneBody/5'UTR/1st exon   | PTGS2     | -4.367±0.493 | -4.702±0.56  | 4.04E-03 |
| cg05023691 | 1 | 192605253  | TSS200                    | RGS13     | 1.11±0.44    | 1.386±0.486  | 8.22E-03 |
| cg27062284 | 1 | 192778258  | GeneBody/1st exon         | RGS2      | -5.56±0.503  | -5.907±0.736 | 6.92E-03 |
| cg05576974 | 1 | 193028138  | GeneBody/1st intron       | UCHL5     | -5.942±0.579 | -6.358±0.541 | 1.65E-03 |
| cg26793710 | 1 | 193091399  | GeneBody/1st exon         | CDC73     | -4.642±0.199 | -5.029±0.378 | 9.69E-10 |
| cg13372488 | 1 | 196577387  | GeneBody/1st exon         | KCNT2     | -3.094±0.969 | -3.697±0.711 | 4.68E-03 |
| cg13650137 | 1 | 197115405  | GeneBody/1st exon         | ASPM      | -4.916±0.381 | -5.255±0.546 | 5.03E-04 |
| cg09255666 | 1 | 200378965  | GeneBody/5'UTR/1st intron | ZNF281    | -5.755±0.666 | -6.353±0.662 | 1.41E-04 |
| cg13945069 | 1 | 200638500  | GeneBody/5'UTR/1st intron | DDX59     | -4.166±0.304 | -4.472±0.403 | 6.68E-05 |
| cg14085328 | 1 | 200639502  | TSS1500                   | DDX59     | -3.892±0.325 | -4.215±0.532 | 2.29E-04 |
| cg15304928 | 1 | 201123562  | GeneBody/5'UTR/1st intron | TMEM9     | -5.021±0.545 | -5.372±0.644 | 7.04E-03 |
| cg17780098 | 1 | 201476311  | GeneBody/5'UTR/1st exon   | CSRPI     | -4.366±0.412 | -4.724±0.402 | 2.04E-04 |
| cg01036148 | 1 | 201951866  | GeneBody/1st exon         | RNPEP     | -4.377±0.327 | -4.677±0.426 | 2.28E-04 |
| cg01918706 | 1 | 202310841  | GeneBody/5'UTR/1st intron | UBE2T     | -5.209±0.365 | -5.509±0.798 | 7.90E-03 |
| cg10091705 | 1 | 202317604  | TSS1500                   | PPP1R12B  | -4.617±0.347 | -4.907±0.462 | 8.03E-04 |
| cg14560895 | 1 | 202777719  | TSS200                    | KDM5B     | -4.12±0.558  | -4.48±0.483  | 4.13E-03 |
| cg24744425 | 1 | 202858153  | GeneBody/1st exon         | RABIF     | -4.896±0.357 | -5.363±0.645 | 5.64E-06 |
| cg19157971 | 1 | 202858393  | TSS200                    | RABIF     | -5.462±0.498 | -5.837±0.578 | 1.64E-03 |
| cg27554769 | 1 | 202896170  | GeneBody/5'UTR/1st intron | KLHL12    | -4.52±0.304  | -4.834±0.356 | 2.96E-05 |
| cg04462209 | 1 | 202896493  | TSS200                    | KLHL12    | -6.192±0.617 | -6.727±0.591 | 2.08E-04 |
| cg12888039 | 1 | 202927266  | GeneBody/5'UTR/1st intron | ADIPOR1   | -5.365±0.457 | -5.697±0.629 | 3.71E-03 |
| cg20133313 | 1 | 202936090  | GeneBody/1st intron       | CYB5R1    | -4.497±0.402 | -4.765±0.56  | 8.06E-03 |
| cg19028804 | 1 | 202976344  | GeneBody/1st exon         | LOC401980 | -5.413±0.501 | -5.784±0.559 | 1.72E-03 |
| cg03764585 | 1 | 203320223  | GeneBody/1st exon         | FMOD      | -1.938±0.764 | -2.405±0.714 | 6.98E-03 |
| cg06672652 | 1 | 203830934  | GeneBody/1st intron       | SNRPE     | -4.416±0.275 | -4.825±0.435 | 1.46E-07 |
| cg20867633 | 1 | 204183116  | GeneBody/5'UTR/1st exon   | GOLT1A    | -3.082±0.474 | -3.397±0.645 | 7.74E-03 |
| cg16072030 | 1 | 204381148  | TSS1500                   | PPP1R15B  | -5.275±0.364 | -5.493±0.355 | 8.97E-03 |
| cg05702633 | 1 | 204381220  | TSS1500                   | PPP1R15B  | -5.25±0.592  | -5.921±0.641 | 5.03E-06 |
| cg18119609 | 1 | 204485302  | TSS1500                   | MDM4      | -4.238±0.659 | -4.641±0.609 | 6.97E-03 |
| cg23807009 | 1 | 204485655  | GeneBody/5'UTR/1st intron | MDM4      | -5.015±0.457 | -5.392±0.595 | 8.50E-04 |
| cg11560403 | 1 | 205053460  | GeneBody/5'UTR/1st exon   | TMEM81    | 4.063±0.222  | 4.271±0.39   | 7.28E-04 |
| cg14514226 | 1 | 205197651  | TSS1500                   | TMCC2     | -4.533±0.845 | -5.064±0.529 | 3.78E-03 |

|            |   |           |                           |             |              |              |          |
|------------|---|-----------|---------------------------|-------------|--------------|--------------|----------|
| cg21478222 | 1 | 205601572 | GeneBody/5'UTR/1st exon   | ELK4        | -4.46±0.459  | -5.044±0.64  | 1.70E-06 |
| cg13791589 | 1 | 205649091 | GeneBody/5'UTR/1st intron | SLC45A3     | -4.799±0.306 | -5.266±0.577 | 3.73E-07 |
| cg11455040 | 1 | 205649941 | TSS1500                   | SLC45A3     | -4.145±0.437 | -4.568±0.568 | 1.11E-04 |
| cg22577136 | 1 | 206644165 | GeneBody/5'UTR/1st intron | IKBKE       | -5.301±0.77  | -5.854±0.643 | 1.41E-03 |
| cg19452316 | 1 | 206680966 | GeneBody/1st exon         | RASSF5      | -4.408±0.966 | -5.177±0.798 | 4.62E-04 |
| cg08617916 | 1 | 206730453 | TSS200                    | RASSF5      | -4.228±0.204 | -4.478±0.644 | 2.02E-03 |
| cg22926560 | 1 | 207226769 | GeneBody/5'UTR/1st intron | PFKFB2      | -4.384±0.482 | -4.698±0.555 | 6.02E-03 |
| cg00247489 | 1 | 207628182 | GeneBody/1st intron       | CR2         | -4.066±0.86  | -4.683±0.573 | 1.13E-03 |
| cg16257086 | 1 | 207925400 | GeneBody/5'UTR/1st exon   | CD46        | -4.948±0.382 | -5.241±0.428 | 1.27E-03 |
| cg23983340 | 1 | 207925461 | GeneBody/5'UTR/1st exon   | CD46        | -4.693±0.287 | -5.043±0.413 | 4.55E-06 |
| cg11844110 | 1 | 208042623 | 0                         | 0           | -3.514±0.195 | -3.722±0.26  | 2.87E-05 |
| cg09686635 | 1 | 210001418 | GeneBody/1st exon         | DIEXF       | -2.574±0.375 | -2.335±0.368 | 5.61E-03 |
| cg15945769 | 1 | 210502792 | GeneBody/5'UTR/1st exon   | HHAT        | -4.556±0.619 | -4.952±0.369 | 3.06E-03 |
| cg11901954 | 1 | 212209499 | TSS1500                   | INTS7       | -4.013±0.458 | -4.472±0.581 | 6.09E-05 |
| cg23909343 | 1 | 212457915 | TSS1500                   | PPP2R5A     | -3.22±0.349  | -3.492±0.419 | 1.22E-03 |
| cg17979628 | 1 | 212606106 | TSS200                    | NENF        | -4.173±0.382 | -4.419±0.485 | 8.32E-03 |
| cg21421701 | 1 | 212872679 | GeneBody/1st intron       | BATF3       | -5.109±0.32  | -5.369±0.707 | 9.35E-03 |
| cg06593568 | 1 | 212965581 | GeneBody/1st intron       | TATDN3      | -4.274±0.336 | -4.543±0.444 | 1.22E-03 |
| cg13240598 | 1 | 213031266 | GeneBody/1st exon         | FLVCR1-AS1  | -4.999±0.363 | -5.231±0.3   | 4.14E-03 |
| cg03386140 | 1 | 213189190 | TSS200                    | ANGEL2      | -5.019±0.496 | -5.536±0.506 | 1.70E-05 |
| cg00620223 | 1 | 214776904 | GeneBody/5'UTR/1st intron | CENPF       | -4.165±0.244 | -4.339±0.349 | 5.00E-03 |
| cg08466883 | 1 | 215741318 | GeneBody/1st intron       | KCTD3       | -3.823±0.529 | -4.158±0.371 | 3.85E-03 |
| cg18263686 | 1 | 217804728 | GeneBody/1st exon         | SPATA17     | -3.38±0.222  | -3.583±0.371 | 7.05E-04 |
| cg02665570 | 1 | 219347340 | GeneBody/1st intron       | LYPLAL1     | -5.173±0.255 | -5.454±0.6   | 6.60E-04 |
| cg16062480 | 1 | 220219722 | GeneBody/1st exon         | EPRS        | -5.488±0.528 | -5.939±0.663 | 5.10E-04 |
| cg24903794 | 1 | 220220036 | TSS200                    | EPRS        | -5.099±0.479 | -5.449±0.644 | 3.32E-03 |
| cg24124789 | 1 | 220268095 | GeneBody/1st intron       | IARS2       | -4.659±0.374 | -5.047±0.583 | 9.59E-05 |
| cg25385272 | 1 | 222763149 | GeneBody/5'UTR/1st exon   | TAF1A       | -4.349±0.409 | -4.665±0.477 | 1.27E-03 |
| cg11177955 | 1 | 222886490 | GeneBody/5'UTR/1st intron | BROX        | -5.528±0.493 | -5.987±0.524 | 1.00E-04 |
| cg20695057 | 1 | 224034220 | TSS1500                   | TP53BP2     | -5.133±0.469 | -5.493±0.521 | 1.21E-03 |
| cg17063018 | 1 | 224302019 | GeneBody/1st exon         | FBXO28      | -4.789±0.365 | -5.219±0.59  | 1.61E-05 |
| cg03496978 | 1 | 224302360 | GeneBody/1st intron       | FBXO28      | -2.235±0.227 | -2.392±0.268 | 3.68E-03 |
| cg03037331 | 1 | 224371490 | GeneBody/1st intron       | DEGS1       | -5.553±0.448 | -5.86±0.421  | 2.72E-03 |
| cg01785339 | 1 | 224544456 | TSS200                    | CNIH4       | -3.776±0.513 | -4.1±0.562   | 6.96E-03 |
| cg01461641 | 1 | 226069919 | GeneBody/5'UTR/1st intron | TMEM63A     | -4.64±0.315  | -4.877±0.446 | 2.97E-03 |
| cg15863254 | 1 | 226374036 | GeneBody/1st intron       | ACBD3       | -3.786±0.233 | -3.934±0.301 | 9.64E-03 |
| cg12962021 | 1 | 226497619 | TSS200                    | LIN9        | -3.177±0.611 | -3.59±0.552  | 2.87E-03 |
| cg17661881 | 1 | 226595978 | TSS200                    | PARP1       | -5.288±0.507 | -5.581±0.402 | 8.95E-03 |
| cg10399369 | 1 | 227128009 | GeneBody/5'UTR/1st exon   | ADCK3       | -5.714±0.638 | -6.199±0.654 | 1.10E-03 |
| cg00935430 | 1 | 227751290 | GeneBody/1st exon         | ZNF678      | -4.291±0.341 | -4.522±0.433 | 5.60E-03 |
| cg00012386 | 1 | 227922512 | TSS200                    | SNAP47      | -4.408±0.315 | -4.712±0.45  | 1.72E-04 |
| cg00105470 | 1 | 228290868 | GeneBody/1st exon         | C1orf35     | -4.35±0.34   | -4.626±0.56  | 2.41E-03 |
| cg08299045 | 1 | 228296964 | GeneBody/5'UTR/1st exon   | MRPL55      | -5.242±0.389 | -5.677±0.524 | 1.42E-05 |
| cg21515744 | 1 | 228327456 | TSS1500                   | GUK1        | -4.382±0.571 | -5.006±0.651 | 1.11E-05 |
| cg25955816 | 1 | 228612876 | GeneBody/1st exon         | HIST3H3     | 1.721±0.336  | 1.501±0.296  | 3.54E-03 |
| cg23274123 | 1 | 229478617 | GeneBody/5'UTR/1st intron | CCSAP       | -5.007±0.449 | -5.59±0.685  | 1.84E-06 |
| cg18058949 | 1 | 229644400 | TSS1500                   | NUP133      | -4.113±0.38  | -4.485±0.578 | 1.97E-04 |
| cg13769204 | 1 | 230203611 | GeneBody/1st intron       | GALNT2      | -4.346±0.316 | -4.682±0.434 | 3.47E-05 |
| cg23213688 | 1 | 231473791 | GeneBody/5'UTR/1st exon   | SPRTN       | -4.341±0.544 | -4.802±0.527 | 2.79E-04 |
| cg01447498 | 1 | 231664671 | GeneBody/1st intron       | TSNAX-DISC1 | -3.616±0.43  | -3.977±0.514 | 5.26E-04 |
| cg24499839 | 1 | 231762238 | TSS1500                   | DISC1       | -4.757±0.609 | -5.146±0.69  | 6.92E-03 |
| cg04049800 | 1 | 233086374 | GeneBody/5'UTR/1st exon   | NTPCR       | -5.688±0.451 | -6.11±0.439  | 7.80E-05 |
| cg11029501 | 1 | 234614232 | GeneBody/1st exon         | TARBP1      | -6.022±0.686 | -6.498±0.726 | 2.94E-03 |
| cg05144089 | 1 | 235292386 | TSS200                    | TOMM20      | -4.387±0.388 | -4.794±0.489 | 2.91E-05 |
| cg06212607 | 1 | 235491708 | TSS200                    | GGPS1       | -4.747±0.247 | -5.061±0.444 | 8.96E-06 |
| cg07093046 | 1 | 236958653 | GeneBody/5'UTR/1st exon   | MTR         | -5.676±0.369 | -6.254±0.638 | 9.19E-08 |
| cg06803184 | 1 | 241683075 | GeneBody/5'UTR/1st exon   | FH          | -4.626±0.318 | -4.845±0.313 | 2.77E-03 |
| cg27277403 | 1 | 241694934 | TSS1500                   | KMO         | -3.501±0.49  | -3.994±0.59  | 5.71E-05 |
| cg07639959 | 1 | 242011162 | TSS1500                   | EXO1        | -5.111±0.537 | -5.633±0.573 | 5.37E-05 |
| cg20629097 | 1 | 242011587 | GeneBody/5'UTR/1st exon   | EXO1        | -4.789±0.429 | -5.166±0.636 | 6.69E-04 |
| cg06090351 | 1 | 244615600 | TSS200                    | ADSS        | -3.827±0.346 | -4.045±0.289 | 4.68E-03 |
| cg15965913 | 1 | 244816200 | TSS200                    | DESI2       | -3.905±0.254 | -4.175±0.325 | 2.66E-05 |
| cg15160742 | 1 | 244817222 | GeneBody/1st intron       | DESI2       | -4.475±0.343 | -4.804±0.455 | 1.39E-04 |
| cg15210596 | 1 | 246887325 | TSS200                    | SCCPDH      | -4.508±0.262 | -4.724±0.404 | 1.60E-03 |
| cg20478514 | 1 | 246887464 | GeneBody/5'UTR/1st exon   | SCCPDH      | -5.811±0.452 | -6.246±0.582 | 1.15E-04 |
| cg07448856 | 1 | 247242043 | GeneBody/5'UTR/1st exon   | ZNF670      | -5.463±0.342 | -5.746±0.613 | 2.90E-03 |
| cg13397379 | 1 | 247696628 | GeneBody/5'UTR/1st intron | OR2C3       | 0.945±0.783  | 0.27±1.037   | 5.31E-04 |
| cg05767404 | 1 | 247712591 | GeneBody/1st intron       | GCSAML      | -0.251±1.017 | -0.998±1.068 | 1.66E-03 |
| cg16479674 | 1 | 249131947 | TSS1500                   | ZNF672      | -4.972±0.41  | -5.393±0.536 | 4.65E-05 |
| cg14931645 | 1 | 249133278 | GeneBody/5'UTR/1st intron | ZNF672      | -4.765±0.433 | -5.076±0.529 | 2.94E-03 |
| cg06506156 | 2 | 3381578   | GeneBody/5'UTR/1st exon   | TSSC1       | -4.842±0.369 | -5.309±0.565 | 3.09E-06 |
| cg03107405 | 2 | 3381941   | TSS1500                   | TSSC1       | -5.059±0.909 | -5.585±0.766 | 9.28E-03 |
| cg04344347 | 2 | 3523406   | TSS200                    | ADI1        | -4.86±0.318  | -5.167±0.578 | 6.01E-04 |
| cg18201077 | 2 | 7017787   | TSS200                    | RSAD2       | -4.215±0.439 | -4.591±0.538 | 4.55E-04 |
| cg13051968 | 2 | 7057649   | GeneBody/5'UTR/1st exon   | RNF144A     | -6.152±0.792 | -6.808±0.711 | 3.25E-04 |
| cg23889771 | 2 | 9563077   | GeneBody/5'UTR/1st intron | ITGB1BP1    | -4.879±0.316 | -5.167±0.432 | 3.09E-04 |
| cg08494812 | 2 | 9983427   | TSS200                    | TAF1B       | -4.618±0.48  | -5.088±0.675 | 1.33E-04 |
| cg20389709 | 2 | 10184303  | TSS200                    | KLF11       | -2.657±0.947 | -3.282±1.253 | 9.68E-03 |
| cg05741384 | 2 | 10588838  | TSS1500                   | ODC1        | -4.317±0.301 | -4.527±0.379 | 4.23E-03 |
| cg19728485 | 2 | 11295717  | GeneBody/1st exon         | PQLC3       | -5.45±0.479  | -6.023±0.692 | 6.25E-06 |
| cg12858075 | 2 | 11606497  | TSS200                    | E2F6        | -4.519±0.434 | -4.88±0.465  | 4.51E-04 |
| cg24624819 | 2 | 11886776  | GeneBody/5'UTR/1st exon   | LPIN1       | -5.062±0.446 | -5.375±0.629 | 5.40E-03 |
| cg15298594 | 2 | 15701366  | GeneBody/1st exon         | NBAS        | -4.872±0.333 | -5.21±0.545  | 1.77E-04 |
| cg25306927 | 2 | 17721751  | TSS200                    | VSNL1       | -3.727±1.083 | -4.427±0.899 | 3.76E-03 |
| cg03580351 | 2 | 17935719  | GeneBody/5'UTR/1st intron | GEN1        | -5.245±0.441 | -5.665±0.583 | 1.50E-04 |
| cg17741106 | 2 | 18742122  | TSS200                    | RDH14       | -4.729±0.444 | -5.052±0.506 | 2.22E-03 |
| cg11475332 | 2 | 20425343  | TSS200                    | SDC1        | -5.557±0.404 | -5.851±0.548 | 3.53E-03 |
| cg19594691 | 2 | 20646743  | TSS200                    | RHOB        | -4.582±0.421 | -4.879±0.514 | 3.54E-03 |
| cg01419675 | 2 | 20646880  | GeneBody/5'UTR/1st exon   | RHOB        | -3.456±0.252 | -3.707±0.319 | 6.25E-05 |
| cg16406212 | 2 | 24163862  | GeneBody/5'UTR/1st intron | UBXN2A      | -4.627±0.676 | -5.064±0.631 | 4.42E-03 |
| cg04809136 | 2 | 24300158  | TSS1500                   | SF3B14      | -4.524±0.406 | -4.847±0.507 | 1.12E-03 |
| cg04461705 | 2 | 24346867  | GeneBody/5'UTR/1st intron | FAM228B     | -3.031±0.186 | -3.185±0.217 | 6.33E-04 |
| cg25477928 | 2 | 24583610  | TSS1500                   | ITSN2       | -3.649±0.287 | -3.904±0.345 | 2.66E-04 |
| cg21494337 | 2 | 25015597  | TSS1500                   | CENPO       | -3.696±0.513 | -4.08±0.705  | 2.82E-03 |
| cg20251973 | 2 | 25016338  | GeneBody/5'UTR/1st exon   | CENPO       | -4.864±0.395 | -5.173±0.615 | 2.78E-03 |

|            |   |          |                           |                    |              |              |          |
|------------|---|----------|---------------------------|--------------------|--------------|--------------|----------|
| cg14002682 | 2 | 25195127 | GeneBody/1st intron       | <i>DNAJC27-AS1</i> | -5.289±0.613 | -5.791±0.624 | 4.83E-04 |
| cg00094851 | 2 | 26205706 | TSS1500                   | <i>KIF3C</i>       | -3.173±0.171 | -3.43±0.308  | 3.40E-07 |
| cg03839341 | 2 | 26256490 | TSS1500                   | <i>RAB10</i>       | -5.601±0.417 | -5.923±0.557 | 1.93E-03 |
| cg11109684 | 2 | 26257047 | GeneBody/5'UTR/1st exon   | <i>RAB10</i>       | -5.249±0.417 | -5.573±0.493 | 1.26E-03 |
| cg14527441 | 2 | 27309759 | GeneBody/5'UTR/1st exon   | <i>KHK</i>         | -4.839±0.289 | -5.13±0.443  | 1.30E-04 |
| cg17605847 | 2 | 27356922 | GeneBody/1st intron       | <i>PREB</i>        | -4.666±0.356 | -4.984±0.547 | 6.39E-04 |
| cg14672622 | 2 | 27434752 | TSS200                    | <i>ATRAID</i>      | -4.218±0.26  | -4.479±0.516 | 6.54E-04 |
| cg10239941 | 2 | 27545751 | GeneBody/5'UTR/1st intron | <i>MPV17</i>       | -4.59±0.322  | -4.91±0.42   | 7.87E-05 |
| cg24189717 | 2 | 27593355 | TSS200                    | <i>SNX17</i>       | -3.642±0.256 | -3.871±0.339 | 3.48E-04 |
| cg25896975 | 2 | 27593451 | GeneBody/1st exon         | <i>SNX17</i>       | -4.96±0.306  | -5.305±0.468 | 2.29E-05 |
| cg21389013 | 2 | 27632056 | GeneBody/1st intron       | <i>PPM1G</i>       | -5.076±0.263 | -5.256±0.355 | 5.78E-03 |
| cg18611281 | 2 | 27805844 | GeneBody/5'UTR/1st exon   | <i>ZNF512</i>      | -3.178±0.35  | -3.403±0.374 | 5.76E-03 |
| cg17050100 | 2 | 27852231 | TSS1500                   | <i>CCDC121</i>     | -5.635±0.584 | -5.985±0.589 | 9.17E-03 |
| cg09223071 | 2 | 27886442 | GeneBody/5'UTR/1st exon   | <i>SUPT7L</i>      | -5.268±0.545 | -5.628±0.578 | 4.60E-03 |
| cg27063607 | 2 | 27994684 | GeneBody/1st intron       | <i>MRPL33</i>      | -5.112±0.613 | -5.566±0.702 | 1.86E-03 |
| cg03177025 | 2 | 28112917 | GeneBody/1st intron       | <i>RBKS</i>        | -2.572±0.364 | -2.912±0.422 | 1.20E-04 |
| cg06869899 | 2 | 28113326 | TSS200                    | <i>RBKS</i>        | -4.547±0.368 | -4.864±0.589 | 1.17E-03 |
| cg08351105 | 2 | 28614671 | TSS1500                   | <i>FOSL2</i>       | -5.619±0.565 | -6.05±0.598  | 1.15E-03 |
| cg11074746 | 2 | 32236343 | TSS1500                   | <i>MEMO1</i>       | -5.339±0.53  | -5.703±0.541 | 3.02E-03 |
| cg07656391 | 2 | 32264720 | GeneBody/5'UTR/1st exon   | <i>DPY30</i>       | -3.921±0.703 | -4.379±0.685 | 4.49E-03 |
| cg19098826 | 2 | 32581711 | TSS1500                   | <i>BIRC6</i>       | -4.763±0.356 | -5.093±0.502 | 2.81E-04 |
| cg15673110 | 2 | 32581747 | TSS1500                   | <i>BIRC6</i>       | -4.713±0.336 | -5.063±0.447 | 4.07E-05 |
| cg27072387 | 2 | 33171699 | TSS1500                   | <i>LTBP1</i>       | -4.351±0.503 | -4.735±0.591 | 1.45E-03 |
| cg07571117 | 2 | 33824316 | GeneBody/5'UTR/1st exon   | <i>FAM98A</i>      | -5.155±0.672 | -5.574±0.516 | 4.79E-03 |
| cg10083236 | 2 | 33824519 | TSS200                    | <i>FAM98A</i>      | -5.276±0.458 | -5.58±0.497  | 4.63E-03 |
| cg25900806 | 2 | 33953779 | TSS1500                   | <i>MYADML</i>      | 0.221±0.354  | -0.045±0.419 | 1.76E-03 |
| cg10881306 | 2 | 36583600 | GeneBody/1st exon         | <i>CRIM1</i>       | -3.375±0.32  | -3.114±0.452 | 1.32E-03 |
| cg14987922 | 2 | 37194071 | TSS1500                   | <i>STRN</i>        | -5.085±0.296 | -5.422±0.626 | 1.92E-04 |
| cg15556558 | 2 | 37194356 | TSS1500                   | <i>STRN</i>        | -5.281±0.479 | -5.656±0.511 | 8.86E-04 |
| cg19931106 | 2 | 37311892 | GeneBody/1st intron       | <i>GPATCH11</i>    | -5.034±0.581 | -5.403±0.731 | 9.00E-03 |
| cg18630855 | 2 | 37459194 | GeneBody/1st intron       | <i>NDUFAF7</i>     | -5.547±0.557 | -5.983±0.517 | 6.62E-04 |
| cg09198463 | 2 | 38603570 | GeneBody/1st intron       | <i>ATL2</i>        | -4.608±0.344 | -4.956±0.578 | 2.10E-04 |
| cg01746088 | 2 | 38978194 | GeneBody/1st intron       | <i>SRSF7</i>       | -4.917±0.363 | -5.182±0.365 | 1.63E-03 |
| cg07959896 | 2 | 39005451 | GeneBody/5'UTR/1st intron | <i>GEMIN6</i>      | -4.616±0.407 | -5.091±0.563 | 7.71E-06 |
| cg19559392 | 2 | 39103372 | GeneBody/5'UTR/1st intron | <i>MORN2</i>       | -4.827±0.325 | -5.298±0.475 | 1.52E-07 |
| cg27074297 | 2 | 39348117 | TSS1500                   | <i>SOS1</i>        | -5.78±0.438  | -6.07±0.508  | 5.32E-03 |
| cg02710105 | 2 | 39664348 | GeneBody/5'UTR/1st exon   | <i>MAP4K3</i>      | -5.632±0.544 | -6.01±0.514  | 2.37E-03 |
| cg20224517 | 2 | 40006561 | TSS200                    | <i>THUMPD2</i>     | -3.64±0.295  | -3.854±0.364 | 2.70E-03 |
| cg06043190 | 2 | 42396882 | GeneBody/1st intron       | <i>EML4</i>        | -4.818±0.604 | -5.241±0.553 | 2.05E-03 |
| cg02278165 | 2 | 42588618 | TSS1500                   | <i>COX7A2L</i>     | -5.126±0.644 | -5.546±0.587 | 3.91E-03 |
| cg05607127 | 2 | 42721581 | TSS1500                   | <i>KCNGB3</i>      | -4.09±0.291  | -4.298±0.368 | 3.30E-03 |
| cg14840416 | 2 | 43453324 | GeneBody/1st intron       | <i>ZFP36L2</i>     | -4.398±0.479 | -4.741±0.536 | 2.41E-03 |
| cg14120336 | 2 | 44001158 | TSS200                    | <i>DYNC2LI1</i>    | -4.349±0.415 | -4.723±0.642 | 6.02E-04 |
| cg14059475 | 2 | 44588633 | GeneBody/5'UTR/1st exon   | <i>PREPL</i>       | -5.596±0.517 | -5.948±0.711 | 6.48E-03 |
| cg05890578 | 2 | 45877647 | TSS1500                   | <i>PRKCE</i>       | -4.691±0.39  | -5.007±0.458 | 7.80E-04 |
| cg11476211 | 2 | 45879284 | GeneBody/1st exon         | <i>PRKCE</i>       | -4.9±0.429   | -5.3±0.591   | 2.34E-04 |
| cg01780482 | 2 | 46524612 | GeneBody/5'UTR/1st exon   | <i>EPAS1</i>       | -5.482±0.505 | -5.837±0.471 | 2.08E-03 |
| cg26251101 | 2 | 46768944 | TSS1500                   | <i>RHOQ</i>        | -3.795±0.673 | -4.226±0.403 | 3.06E-03 |
| cg08813236 | 2 | 46844324 | GeneBody/5'UTR/1st exon   | <i>CRIP1</i>       | -4.541±0.354 | -4.881±0.428 | 9.28E-05 |
| cg06386533 | 2 | 46925753 | TSS1500                   | <i>SOC5</i>        | -5.783±0.469 | -6.114±0.507 | 2.64E-03 |
| cg07897193 | 2 | 46926272 | TSS200                    | <i>SOC5</i>        | -4.96±0.215  | -5.433±0.449 | 8.93E-11 |
| cg14126210 | 2 | 47142867 | GeneBody/5'UTR/1st exon   | <i>MCFD2</i>       | -5.258±0.316 | -5.515±0.537 | 2.81E-03 |
| cg17129141 | 2 | 47629949 | TSS1500                   | <i>MSH2</i>        | -3.849±0.206 | -4.064±0.316 | 8.53E-05 |
| cg02905881 | 2 | 48009730 | TSS1500                   | <i>MSH6</i>        | -4.46±0.45   | -4.929±0.672 | 6.96E-05 |
| cg04495969 | 2 | 48132005 | GeneBody/1st intron       | <i>FBXO11</i>      | -5.092±0.371 | -5.366±0.462 | 2.35E-03 |
| cg00539716 | 2 | 48541921 | GeneBody/5'UTR/1st exon   | <i>FOXN2</i>       | -3.498±0.207 | -3.724±0.257 | 1.47E-05 |
| cg14059729 | 2 | 48667654 | TSS1500                   | <i>PPP1R21</i>     | -5.651±0.348 | -5.895±0.362 | 2.63E-03 |
| cg14698961 | 2 | 48667887 | TSS200                    | <i>PPP1R21</i>     | -4.739±0.581 | -5.345±0.759 | 3.65E-05 |
| cg01615080 | 2 | 54342584 | GeneBody/5'UTR/1st exon   | <i>ACY2</i>        | -3.423±0.266 | -3.603±0.31  | 4.41E-03 |
| cg23539966 | 2 | 55277621 | GeneBody/5'UTR/1st exon   | <i>RTN4</i>        | -5.6±0.624   | -6.177±0.602 | 8.66E-05 |
| cg10455676 | 2 | 55496384 | GeneBody/5'UTR/1st exon   | <i>MTIF2</i>       | -4.72±0.301  | -5.083±0.514 | 1.55E-05 |
| cg15971836 | 2 | 55647419 | TSS1500                   | <i>CCDC88A</i>     | -4.492±0.318 | -4.787±0.399 | 1.81E-04 |
| cg17158059 | 2 | 55746762 | GeneBody/5'UTR/1st exon   | <i>CCDC104</i>     | -4.288±0.279 | -4.576±0.372 | 4.91E-05 |
| cg09685747 | 2 | 55920781 | GeneBody/1st intron       | <i>PNPT1</i>       | -4.558±0.488 | -4.864±0.572 | 8.56E-03 |
| cg18811423 | 2 | 55921094 | TSS200                    | <i>PNPT1</i>       | -4.552±0.416 | -4.979±0.641 | 1.02E-04 |
| cg26093711 | 2 | 58273654 | TSS200                    | <i>VRK2</i>        | -4.742±0.475 | -5.127±0.557 | 7.48E-04 |
| cg15309264 | 2 | 58274034 | GeneBody/5'UTR/1st intron | <i>VRK2</i>        | -3.424±0.207 | -3.639±0.253 | 2.96E-05 |
| cg09600437 | 2 | 61109155 | GeneBody/1st intron       | <i>REL</i>         | -4.813±0.543 | -5.151±0.479 | 5.57E-03 |
| cg09469394 | 2 | 61243988 | TSS1500                   | <i>PEX13</i>       | -4.699±0.368 | -5.058±0.548 | 1.82E-04 |
| cg11736869 | 2 | 61245136 | GeneBody/5'UTR/1st intron | <i>PUS10</i>       | -2.397±0.333 | -2.112±0.475 | 7.59E-04 |
| cg24053619 | 2 | 61293272 | TSS200                    | <i>KIAA1841</i>    | -5.488±0.531 | -5.919±0.568 | 5.77E-04 |
| cg20843052 | 2 | 61293725 | GeneBody/5'UTR/1st intron | <i>KIAA1841</i>    | -3.786±0.27  | -3.976±0.293 | 2.71E-03 |
| cg14101501 | 2 | 62932430 | TSS1500                   | <i>EHBP1</i>       | -5.318±0.494 | -5.758±0.543 | 2.01E-04 |
| cg26260350 | 2 | 63277932 | TSS200                    | <i>OTX1</i>        | -4.863±0.635 | -5.311±0.617 | 2.14E-03 |
| cg03055492 | 2 | 64068493 | GeneBody/5'UTR/1st intron | <i>UGP2</i>        | -5.831±0.551 | -6.365±0.641 | 7.36E-05 |
| cg12691366 | 2 | 64681733 | GeneBody/1st intron       | <i>LGALS1</i>      | -6.282±1.031 | -6.925±0.768 | 4.61E-03 |
| cg23854921 | 2 | 64751325 | TSS200                    | <i>AFTPH</i>       | -6.076±0.531 | -6.609±0.535 | 2.89E-05 |
| cg10423227 | 2 | 64752200 | TSS1500                   | <i>MIR4434</i>     | -4.929±0.41  | -5.282±0.384 | 2.17E-04 |
| cg04576855 | 2 | 64880738 | GeneBody/5'UTR/1st intron | <i>SERTAD2</i>     | -5.379±0.433 | -5.72±0.545  | 1.27E-03 |
| cg22521310 | 2 | 64881850 | TSS1500                   | <i>SERTAD2</i>     | -3.502±0.567 | -3.842±0.596 | 9.77E-03 |
| cg00877964 | 2 | 65215638 | GeneBody/5'UTR/1st exon   | <i>SLC1A4</i>      | -4.774±0.361 | -5.004±0.366 | 5.69E-03 |
| cg05010058 | 2 | 65284262 | GeneBody/5'UTR/1st intron | <i>CEP68</i>       | -3.51±0.517  | -3.924±0.523 | 6.06E-04 |
| cg14217102 | 2 | 65357592 | TSS200                    | <i>RAB1A</i>       | -5.355±0.404 | -5.81±0.516  | 9.73E-06 |
| cg11585425 | 2 | 65454529 | TSS1500                   | <i>ACTR2</i>       | -5.419±0.402 | -5.715±0.474 | 2.14E-03 |
| cg15235832 | 2 | 65455536 | GeneBody/1st intron       | <i>ACTR2</i>       | -3.587±0.354 | -3.829±0.432 | 4.49E-03 |
| cg00054706 | 2 | 68289972 | GeneBody/5'UTR/1st intron | <i>C1D</i>         | -5.173±0.361 | -5.496±0.403 | 2.01E-04 |
| cg22628840 | 2 | 68384458 | GeneBody/1st intron       | <i>WDR92</i>       | -5.158±0.499 | -5.454±0.473 | 8.89E-03 |
| cg25488082 | 2 | 68384862 | TSS200                    | <i>PNO1</i>        | -4.365±0.278 | -4.528±0.252 | 9.21E-03 |
| cg04496615 | 2 | 68479620 | GeneBody/5'UTR/1st exon   | <i>PPP3R1</i>      | -5.432±0.431 | -6±0.686     | 1.84E-06 |
| cg18618964 | 2 | 68480222 | TSS1500                   | <i>PPP3R1</i>      | -4.651±0.339 | -4.893±0.417 | 3.17E-03 |
| cg08646988 | 2 | 69614274 | GeneBody/5'UTR/1st exon   | <i>GFPT1</i>       | -5.332±0.319 | -5.798±0.734 | 7.27E-06 |
| cg14452789 | 2 | 70056602 | TSS1500                   | <i>GMCL1</i>       | -5.562±0.374 | -6.01±0.539  | 6.13E-06 |
| cg17189058 | 2 | 70418126 | GeneBody/5'UTR/1st exon   | <i>C2orf42</i>     | -5.773±0.534 | -6.181±0.533 | 9.90E-04 |
| cg04589975 | 2 | 70418186 | TSS200                    | <i>C2orf42</i>     | -5.715±0.421 | -6.205±0.488 | 3.89E-06 |
| cg09658342 | 2 | 70476000 | TSS1500                   | <i>TIA1</i>        | -4.546±0.557 | -4.904±0.73  | 9.05E-03 |

|            |   |           |                           |          |              |              |          |
|------------|---|-----------|---------------------------|----------|--------------|--------------|----------|
| cg18865999 | 2 | 70485303  | GeneBody/1st exon         | PCYOX1   | -5.247±0.459 | -5.624±0.557 | 7.08E-04 |
| cg23233234 | 2 | 70528859  | GeneBody/1st intron       | FAM136A  | -5.799±0.417 | -6.178±0.584 | 3.46E-04 |
| cg15253672 | 2 | 73114960  | GeneBody/1st intron       | SPR      | -4.673±0.335 | -5.039±0.505 | 3.64E-05 |
| cg03856450 | 2 | 73298881  | GeneBody/5'UTR/1st exon   | SFXN5    | -4.743±0.398 | -5.05±0.557  | 2.25E-03 |
| cg03077062 | 2 | 73299091  | TSS200                    | SFXN5    | -5.203±0.411 | -5.673±0.609 | 1.57E-05 |
| cg06754047 | 2 | 73441257  | TSS200                    | SMYD5    | -3.933±0.294 | -4.233±0.432 | 8.71E-05 |
| cg17895873 | 2 | 73441412  | GeneBody/1st exon         | SMYD5    | -5.261±0.345 | -5.676±0.542 | 9.14E-06 |
| cg06642617 | 2 | 73461528  | GeneBody/5'UTR/1st intron | CCT7     | -6.498±0.678 | -6.993±0.613 | 1.34E-03 |
| cg10373645 | 2 | 74007265  | GeneBody/5'UTR/1st exon   | DUSP11   | -4.693±0.544 | -5.157±0.552 | 2.81E-04 |
| cg19754094 | 2 | 74055942  | TSS200                    | STAMBP   | -4.817±0.758 | -5.296±0.636 | 4.72E-03 |
| cg26809210 | 2 | 74056290  | GeneBody/5'UTR/1st exon   | STAMBP   | -5.025±0.376 | -5.261±0.431 | 7.95E-03 |
| cg03839972 | 2 | 74153800  | TSS200                    | DGUOK    | -3.154±0.378 | -3.463±0.47  | 8.23E-04 |
| cg22544376 | 2 | 74154016  | GeneBody/5'UTR/1st exon   | DGUOK    | -5.521±0.657 | -5.98±0.687  | 2.71E-03 |
| cg08434152 | 2 | 74405770  | GeneBody/1st intron       | MOB1A    | -5.219±0.543 | -5.573±0.544 | 4.68E-03 |
| cg10491648 | 2 | 74648490  | TSS1500                   | WDR54    | -4.143±0.376 | -4.381±0.406 | 6.75E-03 |
| cg11286618 | 2 | 74685465  | TSS200                    | WBP1     | -4.543±0.205 | -4.672±0.208 | 6.39E-03 |
| cg22996555 | 2 | 74692183  | GeneBody/1st exon         | MOGS     | -5.775±0.488 | -6.105±0.683 | 7.16E-03 |
| cg24478630 | 2 | 74692696  | TSS200                    | MOGS     | -4.521±0.581 | -4.928±0.583 | 2.44E-03 |
| cg19324027 | 2 | 74699582  | GeneBody                  | MRPL53   | -4.079±0.287 | -4.366±0.349 | 5.55E-05 |
| cg12825252 | 2 | 74710227  | GeneBody/1st exon         | TTC31    | -6.095±0.527 | -6.414±0.48  | 7.40E-03 |
| cg01347719 | 2 | 74754237  | TSS1500                   | DQX1     | 4.505±0.237  | 4.689±0.374  | 3.16E-03 |
| cg02154074 | 2 | 74756234  | TSS1500                   | HTRA2    | -4.859±0.433 | -5.2±0.607   | 1.80E-03 |
| cg18181070 | 2 | 74756634  | GeneBody/5'UTR/1st exon   | HTRA2    | -4.052±0.345 | -4.345±0.518 | 1.07E-03 |
| cg19401923 | 2 | 75873790  | TSS200                    | MRPL19   | -5.01±0.416  | -5.303±0.45  | 2.73E-03 |
| cg17043155 | 2 | 75873919  | GeneBody/5'UTR/1st exon   | MRPL19   | -4.85±0.359  | -5.129±0.495 | 1.93E-03 |
| cg00627233 | 2 | 79251911  | TSS1500                   | REG3G    | 0.184±0.728  | -0.269±0.797 | 8.72E-03 |
| cg00918005 | 2 | 79253210  | GeneBody/5'UTR            | REG3G    | 1.133±0.615  | 0.553±0.831  | 1.90E-04 |
| cg07841014 | 2 | 79314745  | GeneBody/5'UTR            | REG1B    | 1.98±0.794   | 1.432±0.956  | 4.11E-03 |
| cg00579393 | 2 | 79316004  | TSS1500                   | REG1B    | 1.678±0.767  | 1.073±1.017  | 1.67E-03 |
| cg05828624 | 2 | 79347699  | GeneBody/5'UTR/1st intron | REG1A    | 1.449±0.803  | 0.886±0.854  | 2.71E-03 |
| cg24240626 | 2 | 79386720  | GeneBody/5'UTR/1st exon   | REG3A    | -0.258±0.596 | -0.625±0.704 | 9.96E-03 |
| cg04053638 | 2 | 84686387  | GeneBody/1st exon         | SUCLG1   | -5.417±0.519 | -5.858±0.519 | 2.95E-04 |
| cg00954003 | 2 | 85132392  | TSS1500                   | TMSB10   | -6.114±0.582 | -6.513±0.629 | 3.38E-03 |
| cg14542238 | 2 | 85555574  | TSS200                    | TGOLN2   | -4.606±0.262 | -4.919±0.478 | 2.97E-05 |
| cg00014085 | 2 | 85581505  | GeneBody/1st exon         | RETSAT   | -5.232±0.485 | -5.545±0.566 | 6.75E-03 |
| cg00696900 | 2 | 85767031  | GeneBody/1st intron       | MAT2A    | -4.856±0.38  | -5.155±0.52  | 1.66E-03 |
| cg10506212 | 2 | 85788810  | TSS200                    | GGCX     | -5.491±0.383 | -5.741±0.367 | 4.29E-03 |
| cg22321558 | 2 | 85829320  | GeneBody/1st intron       | TMEM150A | -3.925±0.569 | -4.387±0.637 | 6.46E-04 |
| cg19913889 | 2 | 85830136  | GeneBody/1st exon         | USP39    | -4.966±0.26  | -5.147±0.29  | 3.18E-03 |
| cg19376794 | 2 | 85843782  | GeneBody/1st intron       | USP39    | -4.468±0.537 | -4.872±0.605 | 1.52E-03 |
| cg18763191 | 2 | 86115509  | GeneBody/1st intron       | ST3GAL5  | -4.598±0.319 | -4.96±0.546  | 4.23E-05 |
| cg01040759 | 2 | 86116384  | TSS1500                   | ST3GAL5  | -3.821±0.316 | -4.131±0.369 | 6.26E-05 |
| cg08229694 | 2 | 86422197  | GeneBody/1st intron       | IMMT     | -5.54±0.594  | -5.994±0.729 | 1.61E-03 |
| cg21037570 | 2 | 86422857  | GeneBody/5'UTR/1st exon   | IMMT     | -4.504±0.387 | -4.841±0.418 | 2.63E-04 |
| cg15645605 | 2 | 86426467  | TSS200                    | MRPL35   | -4.83±0.437  | -5.371±0.607 | 2.63E-06 |
| cg11820734 | 2 | 86426725  | GeneBody/1st intron       | MRPL35   | -4.753±0.498 | -5.095±0.437 | 2.32E-03 |
| cg20918903 | 2 | 86668501  | TSS200                    | KDM3A    | -4.861±0.505 | -5.256±0.457 | 6.38E-04 |
| cg11142466 | 2 | 88355481  | TSS1500                   | KRCC1    | -4.731±0.399 | -5.002±0.43  | 3.71E-03 |
| cg23984130 | 2 | 89215185  | 0                         | 0        | 1.298±0.856  | 0.758±0.984  | 7.71E-03 |
| cg22262964 | 2 | 89629580  | 0                         | 0        | -0.737±0.468 | -1.182±0.586 | 1.26E-04 |
| cg13279585 | 2 | 89630389  | 0                         | 0        | -0.02±0.561  | -0.44±0.633  | 1.59E-03 |
| cg01150454 | 2 | 95787883  | TSS200                    | MRPS5    | -5.762±0.492 | -6.158±0.478 | 5.22E-04 |
| cg17412560 | 2 | 95863403  | GeneBody/1st intron       | KCNIP3   | -5.987±0.597 | -1.247±0.678 | 8.93E-03 |
| cg16282101 | 2 | 96068839  | GeneBody/5'UTR/1st intron | FAHD2A   | -4.729±0.396 | -5.13±0.522  | 6.25E-05 |
| cg05399697 | 2 | 96610206  | 0                         | 0        | 1.267±0.273  | 0.92±0.499   | 1.07E-05 |
| cg05261289 | 2 | 96874823  | TSS1500                   | STARD7   | -4.878±0.437 | -5.172±0.405 | 3.06E-03 |
| cg15884411 | 2 | 96932403  | GeneBody/1st intron       | CIAO1    | -4.803±0.324 | -5.213±0.413 | 1.23E-06 |
| cg26625319 | 2 | 97001960  | GeneBody/1st intron       | NCAPH    | -5.576±0.36  | -5.823±0.337 | 2.67E-03 |
| cg01990225 | 2 | 97406019  | TSS1500                   | LMAN2L   | -3.171±0.428 | -3.647±0.705 | 4.48E-05 |
| cg11158729 | 2 | 97427027  | GeneBody/1st exon         | CNNM4    | -4.628±0.382 | -4.882±0.451 | 5.44E-03 |
| cg15157837 | 2 | 97482059  | GeneBody/1st exon         | CNNM3    | -5.485±0.569 | -5.884±0.587 | 2.53E-03 |
| cg23248865 | 2 | 97535578  | GeneBody/5'UTR/1st intron | SEMA4C   | -5.223±0.588 | -5.605±0.721 | 6.99E-03 |
| cg23089298 | 2 | 97536097  | TSS1500                   | SEMA4C   | -4.673±0.285 | -5.004±0.419 | 1.15E-05 |
| cg01628803 | 2 | 98126764  | GeneBody                  | ANKRD36B | -0.376±0.219 | -0.546±0.302 | 2.10E-03 |
| cg22149792 | 2 | 98127954  | GeneBody                  | ANKRD36B | 0.62±0.245   | 0.408±0.381  | 9.41E-04 |
| cg01568335 | 2 | 98262245  | TSS1500                   | COX5B    | -4.079±0.356 | -4.354±0.405 | 1.16E-03 |
| cg23123262 | 2 | 98280693  | TSS200                    | ACTR1B   | -5.109±0.371 | -5.52±0.554  | 2.73E-05 |
| cg25411534 | 2 | 99758462  | GeneBody/5'UTR/1st intron | C2orf15  | -4.427±0.398 | -4.734±0.554 | 2.20E-03 |
| cg01651821 | 2 | 99797358  | GeneBody/1st exon         | MITD1    | -5.089±0.7   | -5.581±0.703 | 2.41E-03 |
| cg14962548 | 2 | 99952717  | GeneBody/5'UTR/1st exon   | TXNDC9   | -5.02±0.312  | -5.351±0.464 | 5.42E-05 |
| cg25853833 | 2 | 101869024 | TSS1500                   | CNOT11   | -4.774±0.375 | -5.093±0.477 | 5.55E-04 |
| cg12293634 | 2 | 101924667 | GeneBody/1st exon         | RNF149   | -5.599±0.44  | -5.93±0.582  | 2.36E-03 |
| cg13948784 | 2 | 103353092 | GeneBody/1st intron       | MFSD9    | -5.553±0.396 | -5.946±0.569 | 1.17E-04 |
| cg17997329 | 2 | 103353471 | TSS200                    | MFSD9    | -3.739±0.271 | -3.971±0.288 | 3.20E-04 |
| cg09738100 | 2 | 105654422 | TSS200                    | MRPS9    | -4.843±0.392 | -5.231±0.54  | 1.02E-04 |
| cg18235146 | 2 | 105954150 | GeneBody/1st intron       | C2orf49  | -4.969±0.28  | -5.216±0.3   | 2.03E-04 |
| cg00585790 | 2 | 109204845 | TSS200                    | LIMS1    | -0.063±0.675 | 0.381±0.837  | 6.59E-03 |
| cg08733774 | 2 | 109335627 | TSS1500                   | RANBP2   | -4.158±0.487 | -4.543±0.616 | 1.25E-03 |
| cg08028004 | 2 | 109336023 | GeneBody/5'UTR/1st exon   | RANBP2   | -2.076±0.393 | -1.633±0.441 | 6.11E-06 |
| cg25741319 | 2 | 109402933 | TSS1500                   | CCDC138  | -4.639±0.515 | -4.968±0.59  | 7.00E-03 |
| cg15605888 | 2 | 109403293 | GeneBody/1st exon         | CCDC138  | -4.773±0.541 | -5.242±0.727 | 5.37E-04 |
| cg27210766 | 2 | 111435943 | TSS1500                   | BUB1     | -4.66±0.407  | -5.06±0.433  | 4.56E-05 |
| cg15585905 | 2 | 112641726 | GeneBody/5'UTR/1st exon   | ANAPC1   | -5.325±0.385 | -5.675±0.631 | 7.16E-04 |
| cg21182454 | 2 | 112656262 | GeneBody/5'UTR/1st exon   | MERTK    | -5.163±0.432 | -5.591±0.662 | 1.73E-04 |
| cg10216105 | 2 | 113239349 | TSS1500                   | TTL      | -4.748±0.586 | -5.272±0.643 | 1.96E-04 |
| cg19061982 | 2 | 113299409 | TSS200                    | POLR1B   | -4.941±0.338 | -5.183±0.419 | 3.25E-03 |
| cg17009717 | 2 | 113299708 | GeneBody/5'UTR/1st exon   | POLR1B   | -3.025±0.154 | -3.171±0.274 | 6.10E-04 |
| cg05672265 | 2 | 113403002 | TSS1500                   | SLC20A1  | -4.659±0.375 | -5.035±0.444 | 4.60E-05 |
| cg10762132 | 2 | 113403533 | GeneBody/5'UTR/1st exon   | SLC20A1  | -6.03±0.59   | -6.395±0.612 | 7.47E-03 |
| cg14899547 | 2 | 113521923 | GeneBody/1st intron       | CKAP2L   | -5.244±0.375 | -5.742±0.515 | 7.05E-07 |
| cg06505666 | 2 | 113522377 | TSS200                    | CKAP2L   | -4.772±0.294 | -5.187±0.453 | 3.79E-07 |
| cg01507173 | 2 | 113816662 | TSS200                    | IL36RN   | 1.436±0.509  | 1.023±0.649  | 9.70E-04 |
| cg26560960 | 2 | 114195306 | GeneBody/5'UTR/1st exon   | CBWD2    | -4.159±0.242 | -4.367±0.277 | 3.37E-04 |
| cg22717127 | 2 | 114195430 | GeneBody/5'UTR/1st exon   | CBWD2    | -5.481±0.412 | -6.08±0.61   | 1.49E-07 |
| cg26540127 | 2 | 114647103 | TSS1500                   | ACTR3    | -4.536±0.362 | -4.822±0.388 | 7.91E-04 |

|            |   |           |                           |                     |              |              |          |
|------------|---|-----------|---------------------------|---------------------|--------------|--------------|----------|
| cg25593040 | 2 | 118572325 | GeneBody/5'UTR/1st exon   | <i>DDX18</i>        | -4.934±0.487 | -5.262±0.459 | 3.12E-03 |
| cg05944800 | 2 | 118845546 | TSS1500                   | <i>INSIG2</i>       | -3.999±0.486 | -4.554±0.583 | 6.21E-06 |
| cg04195527 | 2 | 118846289 | GeneBody/5'UTR/1st intron | <i>INSIG2</i>       | -4.072±0.633 | -4.46±0.539  | 6.17E-03 |
| cg12323894 | 2 | 120124007 | GeneBody/5'UTR/1st exon   | <i>C2orf76</i>      | -4.241±0.226 | -4.532±0.405 | 6.89E-06 |
| cg21085625 | 2 | 120124643 | GeneBody/5'UTR/1st intron | <i>DBI</i>          | -5.146±0.333 | -5.413±0.331 | 5.77E-04 |
| cg22730357 | 2 | 120517546 | GeneBody/5'UTR/1st exon   | <i>PTPN4</i>        | -5.259±0.347 | -5.659±0.301 | 2.32E-06 |
| cg14287603 | 2 | 120771169 | GeneBody/5'UTR/1st exon   | <i>EPB41L5</i>      | -4.117±0.359 | -4.363±0.432 | 4.37E-03 |
| cg02994216 | 2 | 121010979 | GeneBody/5'UTR/1st intron | <i>RALB</i>         | -5.673±0.486 | -6.119±0.543 | 1.38E-04 |
| cg01139059 | 2 | 122512988 | TSS200                    | <i>TSN</i>          | -3.558±0.21  | -3.763±0.235 | 6.09E-05 |
| cg13208492 | 2 | 122513376 | GeneBody/1st exon         | <i>TSN</i>          | -5.542±0.332 | -5.836±0.576 | 1.25E-03 |
| cg19311602 | 2 | 128284023 | GeneBody/5'UTR/1st exon   | <i>IWS1</i>         | -5.57±0.457  | -5.94±0.49   | 6.13E-04 |
| cg23570261 | 2 | 128284252 | TSS200                    | <i>IWS1</i>         | -4.945±0.443 | -5.311±0.62  | 1.09E-03 |
| cg22854546 | 2 | 128568196 | GeneBody/5'UTR/1st intron | <i>WDR33</i>        | -5.215±0.342 | -5.597±0.491 | 1.94E-05 |
| cg01932215 | 2 | 128643031 | GeneBody/5'UTR/1st intron | <i>AMMECR1L</i>     | -6.105±0.383 | -6.344±0.416 | 7.46E-03 |
| cg07314414 | 2 | 128784923 | TSS200                    | <i>SAP130</i>       | -3.101±0.423 | -2.56±0.472  | 6.40E-07 |
| cg07034269 | 2 | 128848528 | TSS1500                   | <i>UGGT1</i>        | -3.603±0.285 | -3.883±0.348 | 7.19E-05 |
| cg08113913 | 2 | 130902424 | GeneBody/1st exon         | <i>CCDC74B</i>      | -4.483±0.389 | -4.931±0.478 | 5.77E-06 |
| cg03956267 | 2 | 130939498 | TSS200                    | <i>MZT2B</i>        | -4.847±0.428 | -5.244±0.597 | 2.70E-04 |
| cg20630567 | 2 | 131099794 | GeneBody/5'UTR/1st exon   | <i>CCDC115</i>      | -4.753±0.313 | -5.229±0.475 | 6.82E-08 |
| cg24697329 | 2 | 131674376 | GeneBody/5'UTR/1st exon   | <i>ARHGEF4</i>      | 1.905±0.611  | 1.348±1.013  | 7.27E-04 |
| cg11395917 | 2 | 131862942 | GeneBody/1st exon         | <i>PLEKHB2</i>      | -5.01±0.621  | -5.42±0.639  | 4.33E-03 |
| cg06540105 | 2 | 132285688 | GeneBody/1st exon         | <i>CCDC74A</i>      | -4.256±0.239 | -4.539±0.419 | 2.50E-05 |
| cg11084611 | 2 | 132480958 | GeneBody/5'UTR/1st intron | <i>C2orf27A</i>     | 2.447±0.592  | 1.937±0.737  | 4.40E-04 |
| cg17865752 | 2 | 135675644 | GeneBody/1st intron       | <i>LOC100129961</i> | -2.26±0.432  | -1.925±0.504 | 1.24E-03 |
| cg15527554 | 2 | 135782086 | GeneBody/1st intron       | <i>MAP3K19</i>      | 1.694±0.402  | 1.409±0.523  | 4.14E-03 |
| cg12813922 | 2 | 135809940 | GeneBody/1st intron       | <i>RAB3GAP1</i>     | -4.759±0.555 | -5.302±0.56  | 4.30E-05 |
| cg13588645 | 2 | 136289118 | GeneBody/5'UTR/1st exon   | <i>R3HDM1</i>       | -5.507±0.386 | -5.961±0.547 | 7.48E-06 |
| cg25752527 | 2 | 136499146 | TSS200                    | <i>UBXN4</i>        | -4.917±0.369 | -5.168±0.328 | 2.65E-03 |
| cg05650565 | 2 | 136499412 | GeneBody/5'UTR/1st exon   | <i>UBXN4</i>        | -5.316±0.574 | -5.777±0.515 | 4.61E-04 |
| cg12124516 | 2 | 136634144 | TSS200                    | <i>MCM6</i>         | -4.171±0.512 | -4.612±0.632 | 4.32E-04 |
| cg11129291 | 2 | 136742688 | GeneBody/1st intron       | <i>DARS</i>         | -4.776±0.578 | -5.236±0.475 | 4.50E-04 |
| cg23996306 | 2 | 136743411 | TSS200                    | <i>DARS</i>         | -4.469±0.309 | -4.877±0.521 | 2.61E-06 |
| cg14689355 | 2 | 148602399 | TSS200                    | <i>ACVR2A</i>       | -4.483±0.252 | -4.682±0.243 | 6.51E-04 |
| cg22464182 | 2 | 148602625 | GeneBody/5'UTR/1st exon   | <i>ACVR2A</i>       | -4.469±0.347 | -4.905±0.422 | 1.17E-06 |
| cg05218490 | 2 | 148778969 | GeneBody/5'UTR/1st intron | <i>ORC4</i>         | -3.254±0.193 | -3.432±0.263 | 2.54E-04 |
| cg11626656 | 2 | 151343868 | GeneBody/1st exon         | <i>RND3</i>         | -4.199±0.572 | -4.637±0.572 | 9.75E-04 |
| cg08463061 | 2 | 151344332 | TSS200                    | <i>RND3</i>         | -4.564±0.688 | -4.987±0.61  | 6.29E-03 |
| cg18581221 | 2 | 152118200 | GeneBody/1st intron       | <i>RBM43</i>        | -5.077±0.412 | -5.528±0.473 | 1.07E-05 |
| cg06191203 | 2 | 152266755 | GeneBody/5'UTR/1st exon   | <i>RIF1</i>         | -5.126±0.512 | -5.618±0.688 | 1.40E-04 |
| cg24334790 | 2 | 152685205 | TSS200                    | <i>ARL5A</i>        | -4.891±0.313 | -5.2±0.464   | 1.49E-04 |
| cg07314337 | 2 | 153574424 | GeneBody/1st exon         | <i>ARL6IP6</i>      | -5.81±0.467  | -6.457±0.607 | 2.21E-07 |
| cg03759077 | 2 | 153575599 | GeneBody/1st intron       | <i>ARL6IP6</i>      | -4.604±0.295 | -4.92±0.366  | 2.00E-05 |
| cg04010530 | 2 | 157188933 | GeneBody/5'UTR/1st intron | <i>NR4A2</i>        | -4.611±0.531 | -4.96±0.53   | 4.28E-03 |
| cg19840387 | 2 | 159314016 | GeneBody/5'UTR/1st intron | <i>PKP4</i>         | -4.188±0.457 | -4.543±0.508 | 1.07E-03 |
| cg24580185 | 2 | 160144534 | TSS1500                   | <i>WDSUB1</i>       | -4.732±0.418 | -5.013±0.612 | 8.43E-03 |
| cg01416012 | 2 | 160304361 | GeneBody                  | <i>BAZ2B</i>        | 2.036±0.322  | 2.248±0.372  | 6.38E-03 |
| cg14325649 | 2 | 161350625 | TSS1500                   | <i>RBMS1</i>        | -3.788±0.453 | -4.107±0.467 | 2.41E-03 |
| cg00866375 | 2 | 162164676 | TSS200                    | <i>PSMD14</i>       | -4.669±0.291 | -4.879±0.465 | 6.41E-03 |
| cg12335708 | 2 | 162931003 | GeneBody/5'UTR/1st exon   | <i>DPP4</i>         | -1.78±0.674  | -2.343±0.594 | 2.77E-04 |
| cg06347928 | 2 | 163175126 | GeneBody/5'UTR/1st exon   | <i>IFIH1</i>        | -4.849±0.4   | -5.144±0.368 | 1.26E-03 |
| cg03549127 | 2 | 163200582 | GeneBody/5'UTR/1st exon   | <i>GCA</i>          | -4.126±0.355 | -4.472±0.51  | 1.54E-04 |
| cg01743370 | 2 | 163200975 | GeneBody/1st intron       | <i>GCA</i>          | -5.54±0.425  | -5.873±0.446 | 8.19E-04 |
| cg20557037 | 2 | 165698099 | TSS200                    | <i>COBLL1</i>       | -3.995±0.417 | -4.311±0.613 | 3.09E-03 |
| cg15513137 | 2 | 166150369 | GeneBody/5'UTR/1st exon   | <i>SCN2A</i>        | -2.741±0.546 | -3.073±0.554 | 9.19E-03 |
| cg08347960 | 2 | 166150400 | GeneBody/5'UTR/1st exon   | <i>SCN2A</i>        | -2.124±0.55  | -2.583±0.544 | 5.00E-04 |
| cg22659356 | 2 | 169104591 | TSS1500                   | <i>STK39</i>        | -4.703±0.818 | -5.178±0.482 | 6.83E-03 |
| cg26824467 | 2 | 169313695 | GeneBody/1st intron       | <i>CERS6</i>        | -4.169±0.426 | -4.456±0.412 | 3.26E-03 |
| cg16691888 | 2 | 170219230 | TSS200                    | <i>LRP2</i>         | -2.776±0.662 | -3.524±0.803 | 7.49E-06 |
| cg05847778 | 2 | 170336167 | GeneBody/1st intron       | <i>BBS5</i>         | -5.208±0.522 | -5.658±0.438 | 1.74E-04 |
| cg21709140 | 2 | 171785487 | GeneBody/5'UTR/1st exon   | <i>GORASP2</i>      | -5.654±0.468 | -6.056±0.53  | 3.44E-04 |
| cg09503780 | 2 | 171786316 | GeneBody/1st intron       | <i>GORASP2</i>      | -5.386±0.551 | -5.861±0.517 | 2.18E-04 |
| cg13882835 | 2 | 172017928 | TSS1500                   | <i>TLK1</i>         | -3.621±0.478 | -4.159±0.599 | 9.06E-06 |
| cg10446968 | 2 | 172750661 | GeneBody/1st intron       | <i>SLC25A12</i>     | -5.152±0.494 | -5.57±0.504  | 3.26E-04 |
| cg17679246 | 2 | 173420265 | GeneBody/1st exon         | <i>PDK1</i>         | -4.995±0.411 | -5.325±0.464 | 7.71E-04 |
| cg22830590 | 2 | 175260396 | GeneBody/5'UTR/1st exon   | <i>CIR1</i>         | -4.907±0.47  | -5.214±0.667 | 9.89E-03 |
| cg27393372 | 2 | 175260701 | GeneBody/1st intron       | <i>SCRN3</i>        | -5.444±0.575 | -5.866±0.473 | 1.12E-03 |
| cg11695601 | 2 | 175870435 | TSS1500                   | <i>CHN1</i>         | -4.096±0.484 | -4.468±0.6   | 1.54E-03 |
| cg26965059 | 2 | 176032539 | TSS200                    | <i>MIR933</i>       | -5.341±0.342 | -5.75±0.557  | 1.30E-05 |
| cg07428089 | 2 | 176046170 | GeneBody/5'UTR/1st exon   | <i>ATP5G3</i>       | -4.909±0.777 | -5.414±0.89  | 6.19E-03 |
| cg19713083 | 2 | 176046495 | TSS200                    | <i>ATP5G3</i>       | -4.411±0.512 | -4.715±0.391 | 7.04E-03 |
| cg00005847 | 2 | 177029073 | GeneBody/5'UTR/1st intron | <i>HOXD3</i>        | -0.715±0.614 | -0.314±0.854 | 9.43E-03 |
| cg20247600 | 2 | 178129336 | GeneBody/5'UTR/1st exon   | <i>NFE2L2</i>       | -2.642±0.23  | -2.801±0.276 | 3.96E-03 |
| cg02961200 | 2 | 178257176 | GeneBody/1st intron       | <i>LOC100130691</i> | -4.08±0.28   | -4.354±0.477 | 3.42E-04 |
| cg13332925 | 2 | 178257559 | GeneBody/1st exon         | <i>AGPS</i>         | -6.063±0.555 | -6.667±0.689 | 1.55E-05 |
| cg02549910 | 2 | 178483601 | GeneBody/5'UTR/1st exon   | <i>TTC30A</i>       | -4.945±0.388 | -5.276±0.455 | 4.27E-04 |
| cg26147657 | 2 | 178483882 | TSS200                    | <i>TTC30A</i>       | -4.872±0.621 | -5.263±0.552 | 5.15E-03 |
| cg09890200 | 2 | 179316161 | TSS200                    | <i>DFNB59</i>       | -4.737±0.256 | -5.175±0.45  | 1.41E-08 |
| cg03283842 | 2 | 179343803 | TSS1500                   | <i>FKBP7</i>        | -4.278±0.548 | -4.61±0.559  | 8.46E-03 |
| cg26778754 | 2 | 182756177 | TSS1500                   | <i>SSFA2</i>        | -4.671±0.509 | -5.119±0.503 | 1.85E-04 |
| cg03276813 | 2 | 182757157 | GeneBody/1st intron       | <i>SSFA2</i>        | -5.73±0.472  | -6.069±0.533 | 2.43E-03 |
| cg12484193 | 2 | 183943469 | GeneBody/5'UTR/1st exon   | <i>DUSP19</i>       | -4.948±0.678 | -5.413±0.675 | 2.92E-03 |
| cg21364150 | 2 | 183943551 | GeneBody/5'UTR/1st exon   | <i>DUSP19</i>       | -3.743±0.388 | -3.992±0.347 | 4.33E-03 |
| cg18757066 | 2 | 187351078 | GeneBody/5'UTR/1st exon   | <i>ZC3H15</i>       | -5.284±0.415 | -5.616±0.411 | 5.83E-04 |
| cg07909265 | 2 | 187455298 | GeneBody/1st intron       | <i>ITGAV</i>        | -4.978±0.57  | -5.441±0.505 | 4.02E-04 |
| cg10426652 | 2 | 190305703 | TSS1500                   | <i>WDR75</i>        | -4.415±0.492 | -4.757±0.59  | 3.80E-03 |
| cg23521281 | 2 | 190306491 | GeneBody/1st intron       | <i>WDR75</i>        | -5.659±0.456 | -6.047±0.522 | 3.96E-04 |
| cg20767936 | 2 | 190526040 | TSS200                    | <i>ASNSD1</i>       | -4.24±0.272  | -4.416±0.209 | 3.61E-03 |
| cg19070338 | 2 | 190526263 | GeneBody/5'UTR/1st exon   | <i>ASNSD1</i>       | -4.827±0.41  | -5.097±0.577 | 8.95E-03 |
| cg26454191 | 2 | 190648463 | TSS1500                   | <i>PMS1</i>         | -4.344±0.336 | -4.794±0.453 | 4.88E-07 |
| cg22234344 | 2 | 191184810 | TSS200                    | <i>HIBCH</i>        | -5.008±0.57  | -5.453±0.575 | 8.00E-04 |
| cg16691616 | 2 | 191209057 | GeneBody/5'UTR/1st intron | <i>INPP1</i>        | -4.393±0.48  | -4.687±0.45  | 6.85E-03 |
| cg06952117 | 2 | 191514435 | GeneBody/5'UTR/1st intron | <i>NAB1</i>         | -5.416±0.503 | -5.763±0.471 | 2.48E-03 |
| cg15522719 | 2 | 191745248 | TSS1500                   | <i>GLS</i>          | -4.973±0.49  | -5.391±0.489 | 2.78E-04 |
| cg25856179 | 2 | 191878705 | GeneBody/5'UTR/1st intron | <i>STAT1</i>        | -5.31±0.487  | -5.666±0.52  | 1.80E-03 |
| cg22272545 | 2 | 197036243 | GeneBody/5'UTR/1st exon   | <i>STK17B</i>       | -4.418±0.374 | -4.787±0.484 | 8.17E-05 |

|            |   |           |                           |           |              |              |          |
|------------|---|-----------|---------------------------|-----------|--------------|--------------|----------|
| cg02358761 | 2 | 197036780 | TSS1500                   | STK17B    | -4.218±0.353 | -4.449±0.424 | 6.34E-03 |
| cg26194560 | 2 | 197664318 | GeneBody/1st exon         | GTF3C3    | -3.282±0.25  | -3.502±0.269 | 2.35E-04 |
| cg15944856 | 2 | 197676146 | TSS1500                   | C2orf66   | 1.01±0.482   | 0.655±0.609  | 2.62E-03 |
| cg11197066 | 2 | 197791305 | GeneBody/1st exon         | PGAP1     | -4.842±0.295 | -5.094±0.446 | 9.91E-04 |
| cg17293470 | 2 | 198318630 | GeneBody/1st intron       | COQ10B    | -5.275±0.382 | -5.59±0.422  | 5.21E-04 |
| cg04183933 | 2 | 198363868 | GeneBody/5'UTR/1st intron | HSPD1     | -4.795±0.609 | -5.27±0.652  | 9.11E-04 |
| cg03947362 | 2 | 200820154 | GeneBody/5'UTR/1st intron | C2orf47   | -5.262±0.535 | -5.66±0.556  | 1.42E-03 |
| cg22444610 | 2 | 201375087 | TSS1500                   | KCTD18    | -3.717±0.353 | -3.957±0.399 | 4.04E-03 |
| cg27561421 | 2 | 201676720 | TSS200                    | BZW1      | -5.512±0.278 | -5.722±0.371 | 2.25E-03 |
| cg14047656 | 2 | 201936671 | GeneBody/5'UTR/1st exon   | NDUFB3    | -4.733±0.425 | -5.134±0.592 | 2.14E-04 |
| cg24749970 | 2 | 202315857 | GeneBody/5'UTR/1st intron | TRAK2     | -5.472±0.503 | -5.99±0.595  | 3.10E-05 |
| cg01585758 | 2 | 203102753 | GeneBody/1st intron       | SUMO1     | -3.06±0.171  | -3.234±0.259 | 1.09E-04 |
| cg02592124 | 2 | 203103479 | TSS200                    | SUMO1     | -5.173±0.409 | -5.452±0.4   | 2.99E-03 |
| cg17872064 | 2 | 203130438 | TSS200                    | NOP58     | -4.979±0.474 | -5.431±0.764 | 3.57E-04 |
| cg00720723 | 2 | 203130645 | GeneBody/5'UTR/1st exon   | NOP58     | -4.405±0.653 | -4.822±0.597 | 4.83E-03 |
| cg21566550 | 2 | 203240691 | TSS1500                   | BMPR2     | -5.652±0.567 | -6.108±0.548 | 5.15E-04 |
| cg09410845 | 2 | 203241870 | GeneBody/5'UTR/1st exon   | BMPR2     | -3.865±0.423 | -4.156±0.516 | 4.42E-03 |
| cg10962407 | 2 | 203736738 | TSS1500                   | ICA1L     | -5.294±0.397 | -5.738±0.55  | 1.57E-05 |
| cg09845946 | 2 | 204192806 | TSS200                    | ABI2      | -5.19±0.356  | -5.431±0.454 | 5.49E-03 |
| cg05462826 | 2 | 204193327 | GeneBody/1st exon         | ABI2      | -4.407±0.229 | -4.65±0.304  | 2.96E-05 |
| cg06707338 | 2 | 207024452 | GeneBody/5'UTR/1st intron | EEF1B2    | -5.272±0.381 | -5.806±0.527 | 2.30E-07 |
| cg19132372 | 2 | 207079152 | TSS1500                   | GPR1      | 1.887±0.53   | 1.518±0.79   | 6.76E-03 |
| cg18579327 | 2 | 208395557 | GeneBody/5'UTR/1st intron | CREB1     | -4.284±0.273 | -4.636±0.41  | 1.93E-06 |
| cg14951734 | 2 | 208576279 | GeneBody/5'UTR/1st exon   | CCNYL1    | -5.604±0.419 | -5.982±0.535 | 2.67E-04 |
| cg01046174 | 2 | 209130700 | TSS1500                   | PIKFYVE   | -5.448±0.629 | -5.843±0.64  | 6.40E-03 |
| cg05306006 | 2 | 210867127 | TSS200                    | RPE       | -5.081±0.365 | -5.38±0.423  | 6.49E-04 |
| cg19203504 | 2 | 210867411 | GeneBody/5'UTR/1st exon   | RPE       | -2.084±0.481 | -2.406±0.513 | 4.12E-03 |
| cg11735605 | 2 | 214016230 | GeneBody/5'UTR/1st exon   | IKZF2     | -4.564±0.419 | -4.963±0.497 | 1.01E-04 |
| cg08803144 | 2 | 216176550 | TSS200                    | ATIC      | -4.507±0.297 | -4.755±0.411 | 9.42E-04 |
| cg02668581 | 2 | 216878340 | GeneBody/5'UTR/1st exon   | MREG      | -5.027±0.381 | -5.386±0.497 | 1.65E-04 |
| cg06250108 | 2 | 216946398 | GeneBody/1st exon         | PECR      | -3.849±0.516 | -4.188±0.434 | 3.38E-03 |
| cg23631636 | 2 | 217363620 | GeneBody/1st intron       | RPL37A    | -5.358±0.512 | -5.949±0.705 | 8.96E-06 |
| cg27367952 | 2 | 219221586 | GeneBody/5'UTR/1st exon   | C2orf62   | -2.448±0.154 | -2.615±0.239 | 4.72E-05 |
| cg10887392 | 2 | 219264158 | TSS1500                   | CTDSP1    | -5.226±0.496 | -5.548±0.373 | 3.30E-03 |
| cg23889021 | 2 | 219264573 | GeneBody/5'UTR/1st exon   | CTDSP1    | -4.347±0.514 | -4.93±0.627  | 7.26E-06 |
| cg15248979 | 2 | 219434002 | GeneBody/1st intron       | RQCD1     | -5.402±0.353 | -5.625±0.334 | 5.40E-03 |
| cg20851245 | 2 | 219538212 | TSS1500                   | RNF25     | 2.795±0.269  | 3.01±0.241   | 4.93E-04 |
| cg18485154 | 2 | 219575996 | GeneBody/5'UTR/1st intron | TTL4      | -4.673±0.554 | -5.096±0.61  | 1.27E-03 |
| cg16256504 | 2 | 219724157 | TSS1500                   | WNT6      | -2.96±0.724  | -3.434±0.784 | 5.10E-03 |
| cg20972416 | 2 | 220025218 | GeneBody/5'UTR/1st intron | NHEJ1     | -5.426±0.546 | -6.005±0.711 | 2.83E-05 |
| cg21020082 | 2 | 220042127 | TSS1500                   | CNPPD1    | -4.376±0.487 | -4.891±0.549 | 1.80E-05 |
| cg11837864 | 2 | 220043521 | GeneBody/1st intron       | FAM134A   | -4.575±0.445 | -5.035±0.54  | 3.23E-05 |
| cg19355685 | 2 | 220071637 | GeneBody/5'UTR/1st exon   | ZFAND2B   | -6.764±0.711 | -7.514±0.854 | 2.28E-05 |
| cg02240226 | 2 | 220110027 | GeneBody/5'UTR/1st exon   | GLB1L     | -5.614±0.458 | -5.968±0.46  | 8.88E-04 |
| cg18797053 | 2 | 220143977 | TSS200                    | DNAJB2    | -4.889±0.328 | -5.363±0.49  | 1.86E-07 |
| cg14091223 | 2 | 220144326 | GeneBody/5'UTR/1st intron | DNAJB2    | -4.868±0.341 | -5.226±0.586 | 1.38E-04 |
| cg27321538 | 2 | 220252231 | GeneBody/1st intron       | DNPEP     | -4.913±0.647 | -5.419±0.719 | 9.69E-04 |
| cg24686224 | 2 | 223520411 | GeneBody/1st intron       | FARSB     | -5.096±0.484 | -5.405±0.426 | 4.51E-03 |
| cg02453591 | 2 | 223521088 | TSS1500                   | FARSB     | -4.183±0.547 | -4.591±0.493 | 1.07E-03 |
| cg23988310 | 2 | 224467049 | GeneBody/5'UTR/1st exon   | SCG2      | -3.318±0.401 | -3.635±0.436 | 8.36E-04 |
| cg01668465 | 2 | 224467144 | GeneBody/5'UTR/1st exon   | SCG2      | -2.962±0.591 | -3.393±0.71  | 2.45E-03 |
| cg12833508 | 2 | 224701802 | GeneBody/1st intron       | AP1S3     | -3.669±0.319 | -3.887±0.339 | 3.29E-03 |
| cg19850163 | 2 | 228336753 | TSS200                    | MIR5703   | -3.318±0.292 | -3.501±0.355 | 9.18E-03 |
| cg11206667 | 2 | 230786584 | GeneBody/5'UTR/1st intron | TRIP12    | -5.15±0.547  | -5.612±0.597 | 3.90E-04 |
| cg02056135 | 2 | 231084523 | GeneBody/5'UTR/1st intron | SP110     | -4.724±0.419 | -5.039±0.482 | 1.63E-03 |
| cg23539753 | 2 | 231280698 | TSS200                    | SP100     | -4.088±0.51  | -4.45±0.462  | 1.84E-03 |
| cg13216088 | 2 | 231921414 | TSS200                    | PSMD1     | -4.598±0.365 | -5.031±0.484 | 4.82E-06 |
| cg19709058 | 2 | 232378848 | GeneBody/1st exon         | LINC00471 | -4.573±0.384 | -4.853±0.526 | 3.58E-03 |
| cg10660136 | 2 | 232379107 | TSS200                    | LINC00471 | -5.836±0.565 | -6.263±0.646 | 1.51E-03 |
| cg22932215 | 2 | 232651635 | GeneBody/5'UTR/1st intron | COPS7B    | -3.819±0.476 | -4.185±0.619 | 1.82E-03 |
| cg09536738 | 2 | 233497827 | TSS1500                   | EFHD1     | -2.412±0.477 | -2.761±0.556 | 2.47E-03 |
| cg13281719 | 2 | 234160162 | TSS200                    | ATG16L1   | -4.738±0.359 | -5.048±0.623 | 1.62E-03 |
| cg21650900 | 2 | 235405122 | GeneBody/1st exon         | ARL4C     | -5.556±0.482 | -6.154±0.813 | 8.37E-06 |
| cg03275186 | 2 | 237994061 | TSS200                    | COPS8     | -4.326±0.311 | -4.729±0.393 | 7.43E-07 |
| cg16354207 | 2 | 238874908 | TSS1500                   | UBE2F     | -2.901±0.493 | -3.263±0.635 | 2.77E-03 |
| cg22418360 | 2 | 238876345 | GeneBody/1st intron       | UBE2F     | -3.215±0.368 | -2.92±0.605  | 2.74E-03 |
| cg14601560 | 2 | 238970191 | GeneBody/1st intron       | SCLY      | -3.293±0.177 | -3.426±0.181 | 1.42E-03 |
| cg23905308 | 2 | 239196947 | GeneBody/5'UTR/1st intron | PER2      | -5.056±0.584 | -5.572±0.623 | 2.11E-04 |
| cg00731459 | 2 | 240323091 | TSS1500                   | HDAC4     | -4.881±0.268 | -5.26±0.429  | 4.44E-07 |
| cg10832945 | 2 | 240499879 | 0                         | 0         | 0.246±0.653  | -0.2±0.782   | 4.47E-03 |
| cg12804976 | 2 | 240965148 | TSS1500                   | NDUFA10   | -4.113±0.343 | -4.514±0.488 | 8.82E-06 |
| cg17422427 | 2 | 241507521 | TSS1500                   | RNPEPL1   | -4.518±0.39  | -4.891±0.443 | 8.52E-05 |
| cg24941797 | 2 | 241526520 | GeneBody/1st intron       | CAPN10    | -6.39±0.593  | -6.847±0.584 | 8.75E-04 |
| cg11034784 | 2 | 242041544 | GeneBody/1st intron       | MTERFD2   | -4.762±0.314 | -5.104±0.414 | 1.99E-05 |
| cg04884732 | 2 | 242042016 | TSS1500                   | MTERFD2   | -4.289±0.385 | -4.571±0.565 | 4.31E-03 |
| cg26102760 | 2 | 242088848 | GeneBody/5'UTR/1st exon   | PASK      | -5.465±0.375 | -6.004±0.651 | 6.38E-07 |
| cg00763679 | 2 | 242254198 | TSS1500                   | 44076     | -4±0.341     | -4.353±0.464 | 5.23E-05 |
| cg14353516 | 2 | 242256053 | GeneBody/5'UTR/1st intron | 44076     | -2.766±0.164 | -2.913±0.229 | 4.55E-04 |
| cg00567479 | 2 | 242295999 | GeneBody/5'UTR/1st intron | FARP2     | -4.215±0.519 | -4.58±0.632  | 3.60E-03 |
| cg14172532 | 2 | 242447907 | TSS200                    | STK25     | -5.406±0.407 | -5.686±0.55  | 5.76E-03 |
| cg11116142 | 3 | 3221344   | GeneBody/1st exon         | CRBN      | -5.539±0.344 | -5.978±0.521 | 2.44E-06 |
| cg15384599 | 3 | 4344887   | TSS200                    | SETMAR    | -4.03±0.303  | -4.381±0.44  | 1.09E-05 |
| cg21858376 | 3 | 4534791   | TSS1500                   | ITPR1     | -4.675±0.347 | -5.078±0.443 | 6.12E-06 |
| cg03223878 | 3 | 5021310   | GeneBody/5'UTR/1st exon   | BHLHE40   | -5.11±0.441  | -5.407±0.398 | 3.01E-03 |
| cg04765422 | 3 | 9004773   | GeneBody/1st intron       | RAD18     | -3.559±0.357 | -3.876±0.528 | 5.76E-04 |
| cg13188385 | 3 | 9291334   | GeneBody/5'UTR/1st exon   | SRGAP3    | -5.265±0.398 | -5.53±0.371  | 3.42E-03 |
| cg17738494 | 3 | 9773251   | TSS200                    | BRPF1     | -3.985±0.534 | -4.403±0.666 | 1.34E-03 |
| cg14800883 | 3 | 9834004   | TSS200                    | ARPC4     | -3.065±0.593 | -3.457±0.628 | 4.50E-03 |
| cg12419067 | 3 | 9975156   | TSS1500                   | CRELD1    | -4.335±0.282 | -4.551±0.388 | 2.33E-03 |
| cg15394409 | 3 | 10028474  | GeneBody/5'UTR/1st exon   | EMC3      | -5.505±0.261 | -5.718±0.347 | 1.07E-03 |
| cg00149659 | 3 | 10157352  | GeneBody/5'UTR/1st exon   | BRK1      | -4.873±0.617 | -5.291±0.681 | 4.04E-03 |
| cg22782492 | 3 | 10184007  | GeneBody/1st intron       | VHL       | -4.206±0.344 | -4.559±0.593 | 2.07E-04 |
| cg03509024 | 3 | 10184013  | GeneBody/1st intron       | VHL       | -4.944±0.33  | -5.247±0.72  | 3.06E-03 |
| cg20282199 | 3 | 10363027  | TSS200                    | SEC13     | -2.946±0.194 | -3.122±0.317 | 7.35E-04 |
| cg14547335 | 3 | 10491247  | GeneBody/5'UTR            | ATP2B2    | 1.908±0.789  | 1.34±0.962   | 2.84E-03 |

|            |   |          |                           |                  |              |              |          |
|------------|---|----------|---------------------------|------------------|--------------|--------------|----------|
| cg14837082 | 3 | 11294604 | GeneBody/5'UTR/1st intron | <i>HRH1</i>      | 1.338±0.353  | 1.076±0.419  | 2.07E-03 |
| cg23610018 | 3 | 11761460 | GeneBody/5'UTR/1st intron | <i>VGLL4</i>     | -6.042±0.606 | -6.63±0.789  | 1.08E-04 |
| cg08220793 | 3 | 12526042 | GeneBody/5'UTR/1st exon   | <i>TSEN2</i>     | -5.4±0.335   | -5.613±0.42  | 8.97E-03 |
| cg15900519 | 3 | 12883503 | TSS1500                   | <i>RPL32</i>     | -4.136±0.367 | -4.417±0.554 | 3.08E-03 |
| cg22319470 | 3 | 13521370 | TSS1500                   | <i>HDAC11</i>    | -5.489±0.421 | -5.852±0.654 | 9.95E-04 |
| cg10061496 | 3 | 13521655 | TSS200                    | <i>HDAC11</i>    | -5.635±0.535 | -6.048±0.704 | 1.79E-03 |
| cg00661202 | 3 | 14166502 | GeneBody/5'UTR/1st exon   | <i>TMEM43</i>    | -5.366±0.335 | -5.878±0.529 | 7.77E-08 |
| cg13604223 | 3 | 14220055 | GeneBody/1st exon         | <i>XPC</i>       | -5.281±0.507 | -5.632±0.516 | 2.74E-03 |
| cg10387901 | 3 | 15106641 | GeneBody/1st exon         | <i>MRPS25</i>    | -4.103±0.328 | -4.475±0.396 | 6.97E-06 |
| cg04228553 | 3 | 15247818 | GeneBody/5'UTR/1st exon   | <i>CAPN7</i>     | -5.873±0.597 | -6.252±0.557 | 5.20E-03 |
| cg23912721 | 3 | 15642893 | GeneBody/1st exon         | <i>HACL1</i>     | -4.69±0.499  | -5.01±0.558  | 6.49E-03 |
| cg09848420 | 3 | 16306259 | GeneBody/1st intron       | <i>DPH3</i>      | -4.458±0.251 | -4.634±0.231 | 2.05E-03 |
| cg22688260 | 3 | 16306809 | GeneBody/5'UTR/1st exon   | <i>OXNAD1</i>    | -5.282±0.301 | -5.679±0.484 | 2.01E-06 |
| cg07200280 | 3 | 16554619 | GeneBody/5'UTR/1st intron | <i>RFTN1</i>     | -4.459±0.898 | -5.18±0.792  | 4.57E-04 |
| cg12062464 | 3 | 20081582 | GeneBody/5'UTR/1st exon   | <i>KAT2B</i>     | -5.38±0.463  | -5.84±0.644  | 1.02E-04 |
| cg12185908 | 3 | 20227516 | GeneBody/5'UTR/1st intron | <i>SGOL1</i>     | -5.091±0.495 | -5.405±0.561 | 7.36E-03 |
| cg16339185 | 3 | 20227809 | TSS200                    | <i>SGOL1</i>     | -5.327±0.423 | -5.627±0.614 | 5.28E-03 |
| cg14550518 | 3 | 21792938 | TSS200                    | <i>ZNF385D</i>   | -3.435±0.671 | -3.929±0.724 | 1.74E-03 |
| cg15966253 | 3 | 23847480 | GeneBody/5'UTR/1st exon   | <i>UBE2E1</i>    | -4.89±0.331  | -5.142±0.355 | 1.19E-03 |
| cg06949789 | 3 | 23958708 | GeneBody/5'UTR/1st exon   | <i>RPL15</i>     | -5.012±0.358 | -5.424±0.481 | 8.60E-06 |
| cg09793001 | 3 | 25705530 | GeneBody/1st intron       | <i>TOP2B</i>     | -4.717±0.315 | -5.022±0.534 | 3.89E-04 |
| cg11356290 | 3 | 28390998 | TSS1500                   | <i>AZI2</i>      | -4.554±0.319 | -5.003±0.482 | 3.57E-07 |
| cg13859541 | 3 | 30647802 | TSS200                    | <i>TGFBR2</i>    | -4.728±0.344 | -5.105±0.423 | 1.31E-05 |
| cg03256955 | 3 | 30649017 | GeneBody/1st intron       | <i>TGFBR2</i>    | -4.392±0.316 | -4.693±0.448 | 2.01E-04 |
| cg13515605 | 3 | 32544567 | TSS200                    | <i>CMTM6</i>     | -4.704±0.351 | -4.931±0.4   | 6.46E-03 |
| cg11786750 | 3 | 32612556 | TSS200                    | <i>DYNC1L1</i>   | -4.501±0.349 | -4.735±0.324 | 3.26E-03 |
| cg24682740 | 3 | 33481729 | GeneBody/5'UTR/1st exon   | <i>UBP1</i>      | -4.44±0.399  | -4.71±0.587  | 8.29E-03 |
| cg18986332 | 3 | 33759647 | GeneBody/5'UTR/1st exon   | <i>CLASP2</i>    | -6.181±0.389 | -6.616±0.635 | 3.84E-05 |
| cg00893636 | 3 | 37034840 | GeneBody/5'UTR/1st exon   | <i>MLH1</i>      | -4.207±0.391 | -4.616±0.476 | 2.70E-05 |
| cg13882267 | 3 | 37493203 | TSS1500                   | <i>ITGA9</i>     | -5.171±0.454 | -5.462±0.397 | 4.42E-03 |
| cg15348640 | 3 | 38179985 | GeneBody/5'UTR/1st exon   | <i>MYD88</i>     | -4.905±0.384 | -5.235±0.499 | 5.07E-04 |
| cg27043630 | 3 | 38180527 | GeneBody/1st intron       | <i>MYD88</i>     | -4.294±0.452 | -4.75±0.62   | 7.72E-05 |
| cg12243255 | 3 | 39194549 | GeneBody/5'UTR/1st intron | <i>CSRNP1</i>    | -5.595±0.414 | -5.934±0.554 | 9.87E-04 |
| cg01798443 | 3 | 39447891 | TSS1500                   | <i>RPSA</i>      | -4.283±0.636 | -4.831±0.583 | 2.12E-04 |
| cg05242945 | 3 | 39447984 | TSS1500                   | <i>RPSA</i>      | -4.603±0.359 | -4.847±0.482 | 6.17E-03 |
| cg27193335 | 3 | 40351750 | TSS1500                   | <i>EIF1B-AS1</i> | -5.135±0.584 | -5.642±0.647 | 2.83E-04 |
| cg13683864 | 3 | 40499215 | GeneBody/1st intron       | <i>RPL14</i>     | -3.981±0.624 | -4.39±0.871  | 9.17E-03 |
| cg14663065 | 3 | 41241630 | GeneBody/5'UTR/1st intron | <i>CTNNB1</i>    | -4.725±0.312 | -5.083±0.437 | 1.07E-05 |
| cg21463023 | 3 | 42623862 | TSS1500                   | <i>SEC22C</i>    | -4.1±0.255   | -4.264±0.284 | 6.33E-03 |
| cg11080718 | 3 | 42846415 | TSS1500                   | <i>HIGD1A</i>    | -2.947±0.286 | -3.142±0.418 | 7.86E-03 |
| cg09632416 | 3 | 43663379 | GeneBody/5'UTR/1st intron | <i>ANO10</i>     | -4.651±0.281 | -4.863±0.36  | 2.09E-03 |
| cg08034397 | 3 | 43663512 | GeneBody/5'UTR/1st exon   | <i>ANO10</i>     | -5.117±0.603 | -5.669±0.571 | 9.76E-05 |
| cg12059012 | 3 | 43733234 | GeneBody/1st intron       | <i>ABHD5</i>     | -5.265±0.343 | -5.731±0.523 | 7.62E-07 |
| cg21796234 | 3 | 44379533 | TSS200                    | <i>TCAIM</i>     | -4.928±0.327 | -5.202±0.339 | 3.68E-04 |
| cg21307697 | 3 | 45017012 | GeneBody/5'UTR/1st intron | <i>ZDHHC3</i>    | -4.447±0.3   | -4.769±0.416 | 2.96E-05 |
| cg04690289 | 3 | 45017999 | GeneBody/1st intron       | <i>EXOSC7</i>    | -4.862±0.486 | -5.305±0.527 | 1.39E-04 |
| cg18294881 | 3 | 45429876 | TSS200                    | <i>LARS2</i>     | -4.884±0.341 | -5.149±0.531 | 3.04E-03 |
| cg12902719 | 3 | 45635223 | TSS1500                   | <i>LIMD1</i>     | -5.123±0.421 | -5.507±0.542 | 2.35E-04 |
| cg03912013 | 3 | 45730489 | TSS200                    | <i>LIMD1-AS1</i> | -4.599±0.273 | -4.79±0.329  | 3.65E-03 |
| cg15602950 | 3 | 45731220 | GeneBody/1st intron       | <i>SACM1L</i>    | -4.672±0.343 | -4.917±0.401 | 2.80E-03 |
| cg13994175 | 3 | 47324524 | TSS200                    | <i>KIF9</i>      | -4.706±0.475 | -5.036±0.642 | 5.27E-03 |
| cg11484288 | 3 | 47422279 | TSS1500                   | <i>PTPN23</i>    | -5.473±0.414 | -5.787±0.414 | 1.07E-03 |
| cg25757737 | 3 | 47423140 | GeneBody/1st intron       | <i>PTPN23</i>    | -4.705±0.379 | -5.036±0.543 | 6.24E-04 |
| cg14700577 | 3 | 47517001 | GeneBody/5'UTR/1st intron | <i>SCAP</i>      | -5.361±0.478 | -5.658±0.505 | 7.65E-03 |
| cg24832353 | 3 | 47823281 | GeneBody/1st exon         | <i>SMARCC1</i>   | -5.01±0.5    | -5.348±0.622 | 5.26E-03 |
| cg16250355 | 3 | 47823674 | TSS1500                   | <i>SMARCC1</i>   | -4.966±0.29  | -4.702±0.358 | 2.11E-04 |
| cg14758413 | 3 | 47843865 | TSS1500                   | <i>DHX30</i>     | -4.466±0.324 | -4.737±0.481 | 1.16E-03 |
| cg12688043 | 3 | 48129944 | GeneBody/5'UTR/1st intron | <i>MAP4</i>      | -4.215±0.588 | -4.605±0.644 | 4.73E-03 |
| cg24031606 | 3 | 48229318 | GeneBody/1st exon         | <i>CDC25A</i>    | -4.497±0.274 | -4.707±0.464 | 4.79E-03 |
| cg11680236 | 3 | 48342764 | GeneBody/1st intron       | <i>NME6</i>      | -4.563±0.394 | -4.901±0.462 | 3.87E-04 |
| cg25858682 | 3 | 48481793 | GeneBody/1st intron       | <i>TMA7</i>      | -4.996±0.374 | -5.265±0.427 | 2.44E-03 |
| cg27575501 | 3 | 48488423 | TSS200                    | <i>ATRIP</i>     | -4.77±0.376  | -5.154±0.477 | 4.47E-05 |
| cg14633527 | 3 | 48541379 | GeneBody/5'UTR/1st exon   | <i>SHISA5</i>    | -3.35±0.313  | -3.084±0.496 | 1.28E-03 |
| cg07854244 | 3 | 48754518 | GeneBody/5'UTR/1st intron | <i>IP6K2</i>     | -4.342±0.263 | -4.592±0.421 | 3.66E-04 |
| cg23364287 | 3 | 48754776 | TSS200                    | <i>IP6K2</i>     | -5.14±0.658  | -5.582±0.662 | 3.57E-03 |
| cg25927124 | 3 | 48884897 | GeneBody/1st exon         | <i>PRKAR2A</i>   | -5.373±0.502 | -5.741±0.629 | 2.69E-03 |
| cg20159072 | 3 | 48936248 | GeneBody/5'UTR/1st exon   | <i>SLC25A20</i>  | -4.922±0.261 | -5.164±0.416 | 4.87E-04 |
| cg21197973 | 3 | 49027347 | GeneBody/5'UTR/1st exon   | <i>P4HTM</i>     | -5.472±0.625 | -5.972±0.7   | 7.79E-04 |
| cg13415434 | 3 | 49044522 | TSS200                    | <i>WDR6</i>      | -4.255±0.281 | -4.502±0.388 | 4.92E-04 |
| cg21019820 | 3 | 49059209 | GeneBody/5'UTR/1st exon   | <i>NDUFAF3</i>   | -5.359±0.52  | -5.674±0.49  | 7.51E-03 |
| cg06655089 | 3 | 49066738 | GeneBody/1st exon         | <i>IMPDH2</i>    | -6.162±0.473 | -6.744±0.686 | 3.80E-06 |
| cg11819013 | 3 | 49066976 | TSS200                    | <i>IMPDH2</i>    | -5.428±0.708 | -5.938±0.632 | 1.51E-03 |
| cg26475097 | 3 | 49130805 | GeneBody/5'UTR/1st intron | <i>QRICH1</i>    | -4.547±0.413 | -4.93±0.534  | 1.97E-04 |
| cg19914751 | 3 | 49142572 | TSS200                    | <i>QARS</i>      | -4.133±0.434 | -4.414±0.579 | 8.90E-03 |
| cg04005725 | 3 | 49208684 | TSS1500                   | <i>KLHDC8B</i>   | -5.336±0.545 | -5.668±0.415 | 5.71E-03 |
| cg22907065 | 3 | 49449503 | GeneBody/5'UTR/1st exon   | <i>RHOA</i>      | -5.35±0.667  | -6±0.672     | 4.56E-05 |
| cg21475255 | 3 | 49507186 | TSS1500                   | <i>DAG1</i>      | -4.713±0.577 | -5.245±0.642 | 1.30E-04 |
| cg12609467 | 3 | 49508289 | GeneBody/5'UTR/1st intron | <i>DAG1</i>      | -3.92±0.216  | -4.158±0.335 | 3.64E-05 |
| cg03688818 | 3 | 49711147 | TSS1500                   | <i>APEH</i>      | -4.292±0.514 | -4.654±0.532 | 2.43E-03 |
| cg08584430 | 3 | 49824184 | TSS1500                   | <i>IP6K1</i>     | -6.002±0.534 | -6.372±0.636 | 3.91E-03 |
| cg03833566 | 3 | 49841087 | GeneBody/1st intron       | <i>FAM212A</i>   | -3.886±0.359 | -4.148±0.422 | 2.34E-03 |
| cg01090445 | 3 | 49893948 | GeneBody/5'UTR/1st exon   | <i>TRAIP</i>     | -4.971±0.485 | -5.355±0.564 | 9.66E-04 |
| cg20162159 | 3 | 49967065 | GeneBody/1st exon         | <i>MON1A</i>     | -5.25±0.419  | -5.513±0.392 | 5.73E-03 |
| cg27088877 | 3 | 49967358 | GeneBody/5'UTR/1st exon   | <i>MON1A</i>     | -6.387±0.451 | -6.751±0.593 | 1.10E-03 |
| cg07808960 | 3 | 49977390 | TSS200                    | <i>RBM6</i>      | -5.94±0.464  | -6.339±0.603 | 5.37E-04 |
| cg04614380 | 3 | 50192449 | TSS1500                   | <i>SEMA3F</i>    | -5.993±0.595 | -6.647±0.75  | 1.44E-05 |
| cg19914607 | 3 | 50242505 | TSS200                    | <i>SLC38A3</i>   | -2.762±0.357 | -3.033±0.504 | 2.72E-03 |
| cg01413314 | 3 | 50330115 | TSS200                    | <i>IFRD2</i>     | -5.734±0.533 | -6.181±0.545 | 3.56E-04 |
| cg26357744 | 3 | 50374304 | GeneBody/1st intron       | <i>RASSF1</i>    | -4.055±0.242 | -4.37±0.382  | 2.13E-06 |
| cg06063729 | 3 | 50374670 | GeneBody/1st exon         | <i>RASSF1</i>    | -3.741±0.252 | -3.965±0.309 | 2.77E-04 |
| cg11035216 | 3 | 50374929 | TSS200                    | <i>RASSF1</i>    | -5.997±0.592 | -6.429±0.666 | 2.04E-03 |
| cg03703325 | 3 | 50606864 | TSS200                    | <i>HEMK1</i>     | -5.03±0.35   | -5.452±0.597 | 1.51E-05 |
| cg08996521 | 3 | 50649994 | GeneBody/5'UTR/1st intron | <i>MAPKAPK3</i>  | -3.871±0.508 | -4.198±0.48  | 4.78E-03 |
| cg25716871 | 3 | 50654228 | TSS1500                   | <i>MAPKAPK3</i>  | -4.766±0.329 | -5.084±0.52  | 2.78E-04 |
| cg17804987 | 3 | 50654788 | GeneBody/5'UTR/1st intron | <i>MAPKAPK3</i>  | -6.033±0.462 | -6.50±0.577  | 4.13E-05 |

|             |   |           |                           |              |              |              |          |
|-------------|---|-----------|---------------------------|--------------|--------------|--------------|----------|
| cg25675349  | 3 | 51705680  | GeneBody/1st exon         | TEX264       | -5.39±0.4    | -5.842±0.523 | 1.01E-05 |
| cg15271594  | 3 | 52029932  | GeneBody/5'UTR/1st exon   | RPL29        | -4.363±0.36  | -4.588±0.439 | 9.50E-03 |
| cg22863122  | 3 | 52090142  | GeneBody/1st exon         | DUSP7        | -5.362±0.445 | -5.765±0.65  | 4.35E-04 |
| cg04262565  | 3 | 52091063  | TSS1500                   | DUSP7        | -4.673±0.324 | -4.961±0.446 | 4.34E-04 |
| cg22557067  | 3 | 52489763  | GeneBody/1st intron       | NISCH        | -4.985±0.541 | -5.429±0.779 | 1.28E-03 |
| cg11041457  | 3 | 52719354  | GeneBody/5'UTR/1st intron | PBRM1        | -2.838±0.412 | -3.215±0.659 | 6.02E-04 |
| cg09307279  | 3 | 52739927  | GeneBody/5'UTR/1st exon   | SPCS1        | -5.887±0.45  | -6.26±0.555  | 6.74E-04 |
| cg20141751  | 3 | 52740234  | TSS200                    | GLT8D1       | -5.213±0.618 | -5.583±0.565 | 7.94E-03 |
| cg12417299  | 3 | 52804560  | GeneBody/1st intron       | NEK4         | -5.39±0.486  | -6.699±0.462 | 5.33E-03 |
| cg13908523  | 3 | 53194728  | TSS1500                   | PRKCD        | -5.633±0.372 | -5.958±0.421 | 2.69E-04 |
| cg07454215  | 3 | 53381805  | TSS200                    | DCP1A        | -5.19±0.418  | -5.556±0.454 | 2.41E-04 |
| cg07356771  | 3 | 53879950  | GeneBody/5'UTR/1st intron | CHDH         | -3.909±0.549 | -4.261±0.623 | 6.71E-03 |
| cg15757271  | 3 | 55521789  | TSS200                    | WNT5A        | -4.668±0.615 | -5.24±0.529  | 6.44E-05 |
| cg01819572  | 3 | 57204530  | 0                         | 0            | -4.315±0.397 | -4.606±0.427 | 1.77E-03 |
| cg09433780  | 3 | 57262354  | GeneBody/1st intron       | APPL1        | -3.426±0.231 | -3.585±0.265 | 3.73E-03 |
| cg05421946  | 3 | 58223373  | GeneBody/5'UTR/1st exon   | ABHD6        | -5.969±0.567 | -6.338±0.61  | 5.30E-03 |
| cg00917893  | 3 | 58419781  | TSS1500                   | PDHB         | -5.151±0.55  | -5.487±0.545 | 7.60E-03 |
| cg02194211  | 3 | 58652346  | GeneBody/5'UTR/1st exon   | FAM3D        | 1.824±0.257  | 1.641±0.364  | 4.81E-03 |
| cg22215728  | 3 | 61236652  | GeneBody/5'UTR/1st intron | FHIT         | -1.939±0.533 | -2.297±0.705 | 6.48E-03 |
| cg11158760  | 3 | 61237270  | TSS200                    | FHIT         | -3.662±0.254 | -3.858±0.235 | 7.59E-04 |
| cg26567442  | 3 | 64008758  | GeneBody/1st intron       | PSMD6        | -4.086±0.393 | -4.413±0.545 | 9.73E-04 |
| cg12187213  | 3 | 64673741  | TSS1500                   | ADAMTS9      | -4.992±0.259 | -5.156±0.325 | 9.44E-03 |
| cg13725272  | 3 | 66024492  | GeneBody/5'UTR/1st exon   | MAGI1        | -5.622±0.394 | -5.894±0.407 | 2.95E-03 |
| cg26131019  | 3 | 66550735  | GeneBody/1st exon         | LRIG1        | -3.574±1.173 | -4.706±0.831 | 3.02E-05 |
| cg00830393  | 3 | 66552063  | TSS1500                   | LRIG1        | -4.504±0.389 | -4.915±0.453 | 2.05E-05 |
| cg09920145  | 3 | 69100714  | GeneBody/1st intron       | TMF1         | -4.94±0.325  | -5.279±0.528 | 1.12E-04 |
| cg24077317  | 3 | 69129461  | GeneBody/1st intron       | UBA3         | -5.874±0.577 | -6.307±0.637 | 1.49E-03 |
| cg0838150   | 3 | 69788442  | TSS200                    | MITF         | -4.444±0.335 | -4.727±0.442 | 6.96E-04 |
| cg07356753  | 3 | 81810745  | GeneBody/5'UTR/1st exon   | GBE1         | -5.498±0.735 | -5.959±0.763 | 6.69E-03 |
| cg22470827  | 3 | 87276743  | GeneBody/1st intron       | CHMP2B       | -5.222±0.293 | -5.517±0.539 | 3.74E-04 |
| cg15379887  | 3 | 88107415  | GeneBody/5'UTR/1st intron | CGGBP1       | -2.705±0.357 | -2.996±0.446 | 8.57E-04 |
| cg27286107  | 3 | 88108209  | TSS200                    | CGGBP1       | -5.315±0.396 | -5.728±0.459 | 2.39E-05 |
| cg04177705  | 3 | 88199274  | TSS1500                   | CGGBP1       | -5.34±0.376  | -5.823±0.549 | 1.77E-06 |
| cg19774491  | 3 | 93692501  | GeneBody/1st intron       | PROS1        | -4.329±0.296 | -4.601±0.413 | 2.98E-04 |
| cg11266874  | 3 | 93699352  | GeneBody/1st intron       | ARL13B       | -4.424±0.341 | -4.742±0.536 | 4.35E-04 |
| cg17767184  | 3 | 93782171  | TSS200                    | DHFR1L1      | -3.89±0.406  | -4.166±0.502 | 4.94E-03 |
| cg25160554  | 3 | 97483242  | TSS200                    | ARL6         | -4.506±0.513 | -4.909±0.725 | 1.87E-03 |
| cg05777319  | 3 | 97483919  | GeneBody/5'UTR/1st intron | ARL6         | -5.071±0.476 | -5.369±0.525 | 7.72E-03 |
| cg03277051  | 3 | 99356666  | TSS1500                   | COL8A1       | -3.912±0.734 | -4.339±0.42  | 6.49E-03 |
| cg02441647  | 3 | 99357499  | GeneBody/5'UTR/1st exon   | COL8A1       | -2.789±0.832 | -3.316±0.527 | 3.50E-03 |
| cg15372098  | 3 | 99537053  | GeneBody/1st intron       | CMSS1        | -4.654±0.423 | -5.006±0.502 | 5.59E-04 |
| cg15994781  | 3 | 100120402 | TSS200                    | TOMM70A      | -4.508±0.421 | -4.905±0.573 | 1.90E-04 |
| cg17127587  | 3 | 100211127 | TSS1500                   | TMEM45A      | -3.999±0.346 | -4.266±0.53  | 2.97E-03 |
| cg18213440  | 3 | 100428172 | TSS200                    | TFG          | -5.065±0.383 | -5.403±0.524 | 4.58E-04 |
| cg21322149  | 3 | 101232006 | GeneBody/5'UTR/1st exon   | SENP7        | -5.223±0.503 | -5.63±0.483  | 4.86E-04 |
| cg24801210  | 3 | 101293432 | GeneBody/1st intron       | PCNP         | -2.948±0.58  | -2.524±0.45  | 1.06E-03 |
| cg03919644  | 3 | 101443603 | GeneBody/1st intron       | CEP97        | -4.459±0.333 | -4.832±0.438 | 1.24E-05 |
| cg06073471  | 3 | 101497857 | TSS200                    | NXPE3        | -4.839±0.315 | -5.078±0.566 | 6.41E-03 |
| cg15646782  | 3 | 101498416 | GeneBody/5'UTR/1st exon   | NXPE3        | -4.821±0.344 | -5.125±0.523 | 6.91E-04 |
| cg02582608  | 3 | 105085991 | GeneBody/5'UTR/1st exon   | ALCAM        | -4.81±0.511  | -5.221±0.544 | 6.46E-04 |
| cg00522034  | 3 | 105587721 | GeneBody/5'UTR/1st exon   | CBLB         | -6.468±0.5   | -6.898±0.578 | 3.61E-04 |
| cg17468841  | 3 | 105588020 | TSS200                    | CBLB         | -5.715±0.463 | -6.259±0.558 | 3.72E-06 |
| cg11390468  | 3 | 107940784 | GeneBody/1st intron       | IFT57        | -3.912±0.376 | -4.274±0.476 | 1.07E-04 |
| cg03402775  | 3 | 108308147 | TSS200                    | DZIP3        | -5.033±0.592 | -5.438±0.545 | 2.61E-03 |
| cg19538699  | 3 | 112281021 | GeneBody/5'UTR/1st exon   | SLC35A5      | -4.896±0.28  | -5.243±0.427 | 4.67E-06 |
| cg15416577  | 3 | 113234093 | TSS200                    | SPICE1       | -5.178±0.381 | -5.506±0.442 | 3.48E-04 |
| cg13199822  | 3 | 113466193 | GeneBody/5'UTR/1st intron | ATP6V1A      | -4.957±0.316 | -5.212±0.341 | 6.72E-04 |
| cg26107778  | 3 | 113775778 | GeneBody/1st intron       | QTRTD1       | -4.783±0.303 | -5.065±0.47  | 3.89E-04 |
| cg05008406  | 3 | 118959563 | GeneBody/5'UTR/1st intron | B4GALT4      | -5.54±0.445  | -6.153±0.66  | 4.63E-07 |
| cg14602658  | 3 | 119182282 | GeneBody/5'UTR/1st exon   | TMEM39A      | -4.834±0.384 | -5.264±0.609 | 3.31E-05 |
| cg11951446  | 3 | 119396386 | TSS200                    | COX17        | -3.774±0.509 | -4.164±0.597 | 1.40E-03 |
| cg10347998  | 3 | 119812602 | GeneBody/5'UTR/1st exon   | GSK3B        | -5.311±0.374 | -5.596±0.496 | 2.12E-03 |
| cg19093820  | 3 | 119963208 | TSS200                    | GPR156       | -3.007±0.344 | -3.246±0.417 | 4.46E-03 |
| cg22187826  | 3 | 121554169 | GeneBody/1st exon         | EAF2         | -5.543±0.615 | -5.978±0.646 | 2.38E-03 |
| cg17324707  | 3 | 122103153 | GeneBody/1st intron       | FAM162A      | -5.75±0.401  | -6.083±0.442 | 4.94E-04 |
| cg211171373 | 3 | 122134914 | TSS200                    | WDR5B        | -5.327±0.633 | -5.698±0.555 | 8.90E-03 |
| cg07309374  | 3 | 122786091 | GeneBody/1st intron       | PDI5         | -3.74±0.297  | -3.596±0.459 | 4.26E-03 |
| cg13144004  | 3 | 124449104 | TSS200                    | UMPS         | -5.915±0.647 | -6.336±0.617 | 4.33E-03 |
| cg00821764  | 3 | 124449680 | GeneBody/1st intron       | UMPS         | -5.411±0.386 | -5.669±0.476 | 5.84E-03 |
| cg12373072  | 3 | 125313773 | GeneBody/5'UTR/1st exon   | OSBPL11      | -3.241±0.396 | -3.558±0.361 | 5.11E-04 |
| cg26436315  | 3 | 126075385 | GeneBody/5'UTR/1st intron | KLF15        | -4.274±0.86  | -4.777±0.693 | 8.26E-03 |
| cg17305187  | 3 | 126076601 | TSS1500                   | KLF15        | -4.102±0.419 | -4.493±0.511 | 1.47E-04 |
| cg06765947  | 3 | 126236742 | TSS200                    | UROC1        | 2.509±0.318  | 2.281±0.544  | 8.26E-03 |
| cg17408686  | 3 | 126422575 | TSS1500                   | CHCHD6       | -0.671±0.686 | -1.131±0.757 | 4.41E-03 |
| cg18043455  | 3 | 127771761 | GeneBody                  | SEC61A1      | -4.098±0.366 | -4.389±0.436 | 9.70E-04 |
| cg14470209  | 3 | 128598183 | TSS200                    | ACAD9        | -5.268±0.411 | -5.714±0.397 | 7.54E-06 |
| cg25378769  | 3 | 128998233 | GeneBody/5'UTR/1st intron | C3orf37      | -5.498±0.458 | -5.875±0.491 | 5.06E-04 |
| cg21378047  | 3 | 129034659 | TSS1500                   | H1FX-AS1     | -4.559±0.399 | -4.851±0.399 | 1.55E-03 |
| cg12276904  | 3 | 129035177 | TSS200                    | H1FX         | -4.759±0.468 | -5.143±0.593 | 8.10E-04 |
| cg22409223  | 3 | 130465572 | GeneBody/5'UTR/1st exon   | PIK3R4       | -2.939±0.206 | -3.066±0.246 | 9.74E-03 |
| cg04167054  | 3 | 130613906 | GeneBody/1st intron       | ATP2C1       | -4.844±0.444 | -5.14±0.504  | 4.84E-03 |
| cg26459500  | 3 | 131100418 | TSS200                    | NUDT16       | -3.42±0.284  | -3.704±0.358 | 6.28E-05 |
| cg04322344  | 3 | 131221642 | GeneBody/1st exon         | MRPL3        | -5.671±0.65  | -6.054±0.449 | 6.72E-03 |
| cg05911610  | 3 | 131221850 | GeneBody/5'UTR/1st exon   | MRPL3        | -5.658±0.773 | -6.211±0.692 | 1.62E-03 |
| cg00881086  | 3 | 132441942 | TSS1500                   | VPHP3-ACAD11 | -4.079±0.27  | -4.253±0.279 | 5.23E-03 |
| cg02387613  | 3 | 133380479 | GeneBody/5'UTR/1st intron | TOPBP1       | -5.264±0.331 | -5.553±0.324 | 1.97E-04 |
| cg19875216  | 3 | 133524841 | GeneBody                  | SRPRB        | -6.316±0.629 | -6.75±0.639  | 2.84E-03 |
| cg25420398  | 3 | 133968920 | GeneBody/1st intron       | RYK          | -3.936±0.576 | -3.532±0.537 | 2.11E-03 |
| cg08115510  | 3 | 134092715 | GeneBody/5'UTR/1st intron | AMOTL2       | -3.965±0.371 | -4.304±0.489 | 2.65E-04 |
| cg06465926  | 3 | 135685042 | GeneBody/5'UTR/1st intron | PPP2R3A      | -3.549±0.226 | -3.745±0.328 | 7.07E-04 |
| cg18932540  | 3 | 136471803 | TSS1500                   | STAG1        | -5.563±0.504 | -5.92±0.49   | 2.11E-03 |
| cg02975259  | 3 | 136581033 | TSS200                    | NCK1         | -6.059±0.44  | -6.394±0.448 | 1.04E-03 |
| cg18931888  | 3 | 137851874 | TSS1500                   | A4GNT        | 2.415±0.319  | 2.182±0.561  | 8.28E-03 |
| cg18047509  | 3 | 138313341 | TSS1500                   | CEP70        | -4.775±0.341 | -5.073±0.504 | 7.12E-04 |
| cg04148458  | 3 | 138327707 | GeneBody/5'UTR/1st exon   | FAIM         | -4.927±0.246 | -5.221±0.453 | 3.11E-05 |

|             |   |           |                           |           |              |              |          |
|-------------|---|-----------|---------------------------|-----------|--------------|--------------|----------|
| cg22451189  | 3 | 139062925 | GeneBody/1st exon         | MRPS22    | -5.264±0.443 | -5.613±0.567 | 1.35E-03 |
| cg09650667  | 3 | 139108740 | TSS1500                   | COPB2     | -5.275±0.324 | -5.78±0.476  | 3.40E-08 |
| cg25152631  | 3 | 140660955 | GeneBody/1st intron       | SLC25A36  | -4.884±0.465 | -5.189±0.669 | 9.67E-03 |
| cg16418163  | 3 | 140950828 | GeneBody/5'UTR/1st intron | ACPL2     | -5.41±0.503  | -5.894±0.694 | 1.55E-04 |
| cg10958402  | 3 | 141456882 | TSS200                    | RNF7      | -4.781±0.368 | -5.076±0.438 | 8.71E-04 |
| cg22228296  | 3 | 141457315 | GeneBody/1st exon         | RNF7      | -5.215±0.402 | -5.65±0.486  | 1.54E-05 |
| cg25264554  | 3 | 142166789 | GeneBody/5'UTR/1st exon   | XRN1      | -3.946±0.356 | -4.329±0.403 | 1.37E-05 |
| cg26301689  | 3 | 142681704 | GeneBody/1st exon         | PAQR9     | 5.251±0.3    | 5.563±0.502  | 1.33E-04 |
| cg10524983  | 3 | 148708929 | TSS1500                   | GYG1      | -3.65±0.424  | -3.927±0.567 | 8.40E-03 |
| cg24078828  | 3 | 149375789 | GeneBody/5'UTR/1st exon   | WWTR1     | -5.303±0.451 | -5.707±0.554 | 2.64E-04 |
| cg19332303  | 3 | 149469910 | GeneBody                  | COMMD2    | -4.58±0.412  | -4.896±0.493 | 1.45E-03 |
| cg24353466  | 3 | 149530978 | GeneBody/5'UTR/1st exon   | RNF13     | -5.948±0.611 | -6.317±0.534 | 6.94E-03 |
| cg14056942  | 3 | 150127151 | GeneBody/1st exon         | TSC22D2   | -3.798±0.217 | -3.941±0.292 | 7.80E-03 |
| cg07048351  | 3 | 150263889 | GeneBody/1st exon         | SERP1     | -5.192±0.42  | -5.597±0.664 | 2.81E-04 |
| cg08570275  | 3 | 152553089 | GeneBody/5'UTR/1st exon   | P2RY1     | -4.131±0.751 | -4.749±0.845 | 5.72E-04 |
| cg22034555  | 3 | 154042159 | GeneBody/1st exon         | DHX36     | -4.321±0.288 | -4.504±0.285 | 5.65E-03 |
| cg22183849  | 3 | 154042356 | TSS200                    | DHX36     | -5.508±0.341 | -5.782±0.562 | 2.75E-03 |
| cg08596544  | 3 | 155572020 | GeneBody/5'UTR/1st exon   | SLC33A1   | -4.509±0.444 | -4.83±0.59   | 3.55E-03 |
| cg22572214  | 3 | 155572542 | TSS1500                   | SLC33A1   | -4.543±0.427 | -4.84±0.652  | 7.50E-03 |
| cg24262469  | 3 | 156391694 | TSS1500                   | TIPARP    | -2.145±0.441 | -1.811±0.46  | 1.21E-03 |
| cg09459188  | 3 | 158520176 | GeneBody/1st intron       | MFSD1     | -5.735±0.57  | -6.113±0.658 | 5.22E-03 |
| cg011308501 | 3 | 159706823 | GeneBody/5'UTR/1st exon   | IL12A     | -5.824±0.669 | -6.255±0.682 | 5.23E-03 |
| cg24494008  | 3 | 160116838 | GeneBody/5'UTR/1st intron | IFT80     | -3.619±0.534 | -3.974±0.553 | 4.10E-03 |
| cg22668533  | 3 | 160117570 | GeneBody/5'UTR/1st intron | SMC4      | -5.072±0.244 | -5.24±0.275  | 3.54E-03 |
| cg16978263  | 3 | 160118452 | GeneBody/5'UTR/1st exon   | SMC4      | -4.054±0.294 | -4.406±0.382 | 3.51E-06 |
| cg21508214  | 3 | 160118610 | GeneBody/5'UTR/1st exon   | SMC4      | -5.975±0.533 | -6.424±0.604 | 4.38E-04 |
| cg09171381  | 3 | 160938910 | TSS200                    | NMD3      | -4.445±0.403 | -4.795±0.562 | 5.93E-04 |
| cg12291552  | 3 | 167813648 | TSS1500                   | GOLIM4    | -5.603±0.448 | -6.032±0.634 | 1.86E-04 |
| cg12437239  | 3 | 167814123 | TSS1500                   | GOLIM4    | -3.97±0.567  | -4.318±0.472 | 5.96E-03 |
| cg08400120  | 3 | 169940839 | GeneBody/1st intron       | PRKC1     | -4.34±0.292  | -4.552±0.327 | 2.16E-03 |
| cg15348799  | 3 | 170075452 | TSS200                    | SKIL      | -4.77±0.478  | -5.235±0.672 | 1.42E-04 |
| cg10527457  | 3 | 172468452 | TSS200                    | ECT2      | -5.655±0.414 | -6.047±0.519 | 1.27E-04 |
| cg17606881  | 3 | 172469009 | GeneBody/5'UTR/1st intron | ECT2      | -4.925±0.654 | -5.353±0.633 | 4.25E-03 |
| cg11313124  | 3 | 178789226 | GeneBody/5'UTR/1st intron | ZMAT3     | -4.513±0.3   | -4.856±0.479 | 2.37E-05 |
| cg18380974  | 3 | 178789848 | TSS200                    | ZMAT3     | -2.759±0.255 | -3.015±0.277 | 3.52E-05 |
| cg19522332  | 3 | 178866004 | TSS1500                   | PIK3CA    | -3.337±0.321 | -3.566±0.327 | 2.10E-03 |
| cg22384366  | 3 | 178867004 | GeneBody/5'UTR/1st intron | PIK3CA    | -4.452±0.572 | -5.029±0.618 | 3.20E-05 |
| cg20506766  | 3 | 179065432 | TSS200                    | MFN1      | -5.093±0.454 | -5.415±0.476 | 2.36E-03 |
| cg12979743  | 3 | 179322479 | TSS200                    | MRPL47    | -4.31±0.27   | -4.504±0.245 | 1.64E-03 |
| cg18652121  | 3 | 179322868 | GeneBody/1st intron       | NDUFB5    | -4.522±0.494 | -4.838±0.497 | 5.40E-03 |
| cg27437944  | 3 | 180630533 | GeneBody/1st intron       | FXR1      | -4.971±0.514 | -5.526±0.649 | 1.87E-05 |
| cg13913917  | 3 | 182511332 | GeneBody/5'UTR/1st exon   | ATP11B    | -4.894±0.384 | -5.192±0.519 | 1.86E-03 |
| cg25416014  | 3 | 183146809 | TSS1500                   | MCF2L2    | -3.983±0.553 | -4.437±0.672 | 7.25E-04 |
| cg12783640  | 3 | 183735660 | GeneBody/5'UTR/1st exon   | ABCC5     | -5.103±0.426 | -5.608±0.624 | 7.85E-06 |
| cg24408199  | 3 | 183852724 | TSS200                    | EIF2B5    | -4.849±0.395 | -5.126±0.346 | 1.89E-03 |
| cg18313702  | 3 | 183853126 | GeneBody/5'UTR/1st exon   | EIF2B5    | -4.667±0.277 | -5.087±0.422 | 7.82E-08 |
| cg23679085  | 3 | 183892773 | GeneBody/5'UTR/1st intron | AP2M1     | -4.877±0.306 | -5.19±0.406  | 5.51E-05 |
| cg06242000  | 3 | 183966155 | GeneBody/1st intron       | ALG3      | -3.666±0.424 | -4.004±0.494 | 9.15E-04 |
| cg01494864  | 3 | 183967233 | GeneBody/5'UTR/1st exon   | ALG3      | -4.504±0.328 | -4.835±0.501 | 1.30E-04 |
| cg05655556  | 3 | 184016629 | TSS1500                   | PSMD2     | -4.529±0.392 | -4.891±0.593 | 4.02E-04 |
| cg25615963  | 3 | 184032106 | TSS200                    | EIF4G1    | -4.608±0.458 | -4.885±0.417 | 7.14E-03 |
| cg04531710  | 3 | 184032412 | GeneBody/5'UTR/1st exon   | EIF4G1    | -5.572±0.419 | -6.179±0.71  | 4.26E-07 |
| cg25552889  | 3 | 184057683 | GeneBody                  | FAM131A   | 2.496±0.405  | 2.141±0.931  | 6.05E-03 |
| cg27485235  | 3 | 184080068 | GeneBody/5'UTR/1st intron | POLR2H    | -4.83±0.654  | -5.245±0.701 | 6.59E-03 |
| cg00971396  | 3 | 184081400 | GeneBody/1st intron       | POLR2H    | -5.088±0.382 | -5.362±0.479 | 3.21E-03 |
| cg09938768  | 3 | 184279093 | TSS1500                   | EPHB3     | -4.514±0.42  | -4.846±0.532 | 1.27E-03 |
| cg13031679  | 3 | 186285398 | TSS1500                   | TBCCD1    | -4.63±0.412  | -4.868±0.337 | 9.08E-03 |
| cg19957727  | 3 | 186288330 | GeneBody/5'UTR/1st exon   | TBCCD1    | -5.223±0.435 | -5.689±0.505 | 1.57E-05 |
| cg20872461  | 3 | 186524196 | GeneBody/5'UTR/1st exon   | RFC4      | -5.521±0.344 | -5.777±0.534 | 4.46E-03 |
| cg01057962  | 3 | 187463312 | GeneBody/5'UTR/1st exon   | BCL6      | -4.694±0.382 | -5.012±0.517 | 8.73E-04 |
| cg18776764  | 3 | 187463562 | TSS200                    | BCL6      | -5.342±0.701 | -5.926±0.682 | 3.51E-04 |
| cg05044994  | 3 | 187896605 | GeneBody/1st exon         | FLJ42393  | 0.634±0.519  | 0.287±0.673  | 6.39E-03 |
| cg01120898  | 3 | 190231382 | TSS1500                   | IL1RAP    | -5.225±0.415 | -5.558±0.378 | 4.86E-04 |
| cg10906552  | 3 | 190232089 | GeneBody/5'UTR/1st intron | IL1RAP    | -4.983±0.3   | -5.297±0.399 | 3.80E-05 |
| cg03192737  | 3 | 190931199 | GeneBody/1st intron       | OSTN      | 0.101±0.595  | -0.386±0.678 | 7.30E-04 |
| cg13713381  | 3 | 194354433 | TSS1500                   | TMEM44    | -5.597±0.533 | -5.962±0.483 | 2.59E-03 |
| cg16185365  | 3 | 196230308 | GeneBody/5'UTR/1st exon   | RNF168    | -4.911±0.459 | -5.414±0.611 | 1.88E-05 |
| cg26336277  | 3 | 197476294 | TSS200                    | FYTTD1    | -4.117±0.633 | -4.667±0.778 | 3.87E-04 |
| cg12194493  | 4 | 493061    | GeneBody/5'UTR/1st exon   | PIGG      | -5.931±0.574 | -6.397±0.615 | 5.90E-04 |
| cg16625216  | 4 | 926338    | GeneBody/5'UTR/1st intron | TMEM175   | -5.428±0.533 | -5.774±0.507 | 4.49E-03 |
| cg06393290  | 4 | 1004778   | TSS1500                   | FGFRL1    | -4.864±0.481 | -5.164±0.571 | 8.98E-03 |
| cg00940891  | 4 | 1006016   | TSS1500                   | FGFRL1    | -5.62±0.517  | -6.089±0.631 | 2.20E-04 |
| cg05518543  | 4 | 1283165   | TSS1500                   | MAEA      | -4.133±0.432 | -4.619±0.505 | 7.44E-06 |
| cg13225039  | 4 | 1722160   | GeneBody/1st intron       | TMEM129   | -3.262±0.233 | -3.433±0.382 | 6.33E-03 |
| cg16538604  | 4 | 2010703   | GeneBody/1st exon         | NELFA     | -5.77±0.473  | -6.297±0.699 | 2.36E-05 |
| cg00072216  | 4 | 2263638   | GeneBody/1st intron       | MXD4      | -5.325±0.477 | -5.837±0.533 | 1.39E-05 |
| cg02496295  | 4 | 2846155   | GeneBody/5'UTR/1st intron | ADD1      | -5.375±0.388 | -5.891±0.67  | 2.79E-06 |
| cg14694952  | 4 | 3076907   | GeneBody/1st intron       | HTT       | -5.002±0.366 | -5.259±0.491 | 4.61E-03 |
| cg19096034  | 4 | 3533527   | GeneBody/1st intron       | LRPAP1    | -3.977±0.381 | -4.253±0.474 | 2.79E-03 |
| cg02142461  | 4 | 4293079   | GeneBody/5'UTR/1st intron | ZBTB49    | 1.151±0.484  | 1.477±0.573  | 4.86E-03 |
| cg14530801  | 4 | 4544016   | GeneBody/1st exon         | STX18-AS1 | -5.068±0.47  | -5.399±0.699 | 6.29E-03 |
| cg11237738  | 4 | 5527295   | GeneBody/1st intron       | C4orf6    | 1.47±0.535   | 1.128±0.611  | 6.91E-03 |
| cg14489884  | 4 | 6711592   | GeneBody/5'UTR/1st exon   | MRFAP1L1  | -5.173±0.486 | -5.525±0.553 | 2.27E-03 |
| cg02057157  | 4 | 6717681   | TSS200                    | BLOC1S4   | -3.192±0.562 | -3.642±0.761 | 1.54E-03 |
| cg18424538  | 4 | 6717981   | GeneBody/1st exon         | BLOC1S4   | -5.422±0.479 | -5.795±0.537 | 1.06E-03 |
| cg19278809  | 4 | 6785080   | GeneBody/5'UTR/1st intron | KIAA0232  | -5.088±0.393 | -5.479±0.638 | 2.14E-04 |
| cg12497851  | 4 | 6910926   | TSS1500                   | TBC1D14   | -3.885±0.229 | -4.182±0.338 | 1.64E-06 |
| cg13564595  | 4 | 7069733   | GeneBody/1st exon         | GRPEL1    | -5.916±0.475 | -6.34±0.497  | 5.66E-04 |
| cg05927159  | 4 | 10118984  | TSS1500                   | WDR1      | -4.75±0.356  | -5.091±0.456 | 1.20E-04 |
| cg21774863  | 4 | 13486498  | TSS1500                   | RAB28     | -4.807±0.259 | -5.156±0.492 | 5.04E-06 |
| cg13455369  | 4 | 13629759  | TSS1500                   | BOD1L1    | -5.099±0.492 | -5.436±0.488 | 2.98E-03 |
| cg23435440  | 4 | 17811362  | GeneBody/5'UTR/1st intron | DCAF16    | -3.263±0.418 | -3.697±0.576 | 4.90E-05 |
| cg14377370  | 4 | 17812264  | GeneBody/5'UTR/1st exon   | DCAF16    | -6.185±0.512 | -6.676±0.514 | 5.70E-05 |
| cg05568762  | 4 | 18023126  | GeneBody/1st intron       | LCORL     | -5.008±0.287 | -5.285±0.409 | 1.67E-04 |
| cg01154775  | 4 | 20702329  | GeneBody/5'UTR/1st intron | PACRGL    | -4.557±0.436 | -4.846±0.597 | 8.00E-03 |

|            |   |           |                           |                  |              |              |          |
|------------|---|-----------|---------------------------|------------------|--------------|--------------|----------|
| cg12435758 | 4 | 25032141  | GeneBody/1st exon         | <i>LG12</i>      | -4.674±0.43  | -4.991±0.569 | 2.90E-03 |
| cg16148403 | 4 | 25161816  | GeneBody/1st intron       | <i>SEPSECS</i>   | -5.111±0.575 | -5.487±0.63  | 5.24E-03 |
| cg18815539 | 4 | 25162020  | GeneBody/5'UTR/1st exon   | <i>SEPSECS</i>   | -5.8±0.558   | -6.215±0.65  | 1.86E-03 |
| cg22845362 | 4 | 25378974  | GeneBody/5'UTR/1st intron | <i>ANAPC4</i>    | -5.749±0.473 | -6.08±0.492  | 2.67E-03 |
| cg18953280 | 4 | 26585505  | TSS200                    | <i>TBC1D19</i>   | -4.731±0.645 | -5.157±0.683 | 4.63E-03 |
| cg06251489 | 4 | 26861983  | TSS1500                   | <i>TIM2</i>      | -5.425±0.535 | -5.84±0.645  | 1.34E-03 |
| cg18081881 | 4 | 37828048  | TSS1500                   | <i>PGM2</i>      | -5.767±0.827 | -6.283±0.687 | 5.14E-03 |
| cg00737514 | 4 | 37893313  | GeneBody/5'UTR/1st intron | <i>TBC1D1</i>    | -4.7±0.726   | -5.168±0.529 | 3.39E-03 |
| cg00762512 | 4 | 39460606  | TSS200                    | <i>LIAS</i>      | -4.316±0.376 | -4.578±0.469 | 4.11E-03 |
| cg12315997 | 4 | 39461668  | GeneBody/1st intron       | <i>LIAS</i>      | -3.095±0.42  | -3.365±0.465 | 6.28E-03 |
| cg05029288 | 4 | 39529354  | TSS200                    | <i>UGDH-AS1</i>  | -4.256±0.402 | -4.553±0.63  | 4.95E-03 |
| cg22158956 | 4 | 39529514  | GeneBody/1st exon         | <i>UGDH-AS1</i>  | -4.263±0.268 | -4.497±0.519 | 2.59E-03 |
| cg05507894 | 4 | 39640920  | TSS1500                   | <i>SMIM14</i>    | -5.402±0.372 | -5.81±0.681  | 1.10E-04 |
| cg17815841 | 4 | 39979368  | GeneBody/5'UTR/1st exon   | <i>PDS5A</i>     | -5.1±0.368   | -5.422±0.494 | 4.74E-04 |
| cg08321272 | 4 | 41992621  | GeneBody/5'UTR/1st exon   | <i>SLC30A9</i>   | -6.15±0.559  | -6.505±0.544 | 5.56E-03 |
| cg27427207 | 4 | 42658610  | GeneBody/1st intron       | <i>ATP8A1</i>    | -4.789±0.491 | -5.126±0.415 | 2.23E-03 |
| cg21219744 | 4 | 44680344  | TSS200                    | <i>GUF1</i>      | -4.762±0.355 | -5.109±0.469 | 1.02E-04 |
| cg26303908 | 4 | 44728763  | TSS200                    | <i>GNPDA2</i>    | -4.85±0.621  | -5.27±0.795  | 5.65E-03 |
| cg18719814 | 4 | 47916640  | GeneBody/5'UTR/1st exon   | <i>NFXL1</i>     | -5.325±0.503 | -5.93±0.694  | 4.61E-06 |
| cg22722822 | 4 | 54931066  | TSS1500                   | <i>CHIC2</i>     | -4.838±0.673 | -5.342±0.661 | 1.19E-03 |
| cg14838256 | 4 | 56212685  | GeneBody/1st exon         | <i>SRD5A3</i>    | -5.592±0.556 | -6.106±0.564 | 9.89E-05 |
| cg10313093 | 4 | 56261753  | TSS1500                   | <i>TMEM165</i>   | -4.888±0.285 | -5.175±0.39  | 7.56E-05 |
| cg02426410 | 4 | 57253603  | GeneBody/5'UTR/1st exon   | <i>AASDH</i>     | -5.507±0.542 | -5.899±0.567 | 1.93E-03 |
| cg04418752 | 4 | 57301960  | GeneBody/5'UTR/1st exon   | <i>PAICS</i>     | -4.282±0.253 | -4.627±0.356 | 4.44E-07 |
| cg13086586 | 4 | 57303149  | GeneBody/1st intron       | <i>PAICS</i>     | -1.237±0.374 | -0.974±0.585 | 7.29E-03 |
| cg03129910 | 4 | 57333643  | TSS200                    | <i>SRP72</i>     | -4.226±0.352 | -4.587±0.454 | 4.53E-05 |
| cg05503412 | 4 | 57843540  | GeneBody/1st exon         | <i>NOA1</i>      | -5.092±0.597 | -5.462±0.545 | 6.23E-03 |
| cg00884221 | 4 | 57976915  | TSS1500                   | <i>IGFBP7</i>    | -3.396±1.204 | -4.086±0.634 | 7.06E-03 |
| cg08928646 | 4 | 68567174  | GeneBody/1st exon         | <i>LOC550112</i> | -4.086±0.516 | -4.469±0.556 | 1.61E-03 |
| cg02936740 | 4 | 68995995  | TSS1500                   | <i>TMPRSS11F</i> | 0.777±0.579  | 0.388±0.674  | 5.33E-03 |
| cg04276232 | 4 | 70362022  | TSS1500                   | <i>UGT2B4</i>    | 1.788±0.266  | 1.499±0.361  | 2.33E-05 |
| cg22182945 | 4 | 71200583  | TSS200                    | <i>CABS1</i>     | 1.742±0.588  | 1.329±0.806  | 4.87E-03 |
| cg17849194 | 4 | 71553882  | TSS1500                   | <i>UTP3</i>      | -5.581±0.486 | -5.906±0.488 | 3.70E-03 |
| cg24329794 | 4 | 71704884  | GeneBody/5'UTR/1st intron | <i>GRSF1</i>     | -4.663±0.43  | -4.969±0.568 | 3.94E-03 |
| cg20368979 | 4 | 73935086  | GeneBody/1st exon         | <i>COX18</i>     | -3.862±0.193 | -3.996±0.291 | 7.16E-03 |
| cg16468729 | 4 | 74606465  | GeneBody/1st intron       | <i>IL8</i>       | -2.515±0.426 | -2.82±0.51   | 3.18E-03 |
| cg25467043 | 4 | 76440093  | GeneBody/5'UTR/1st intron | <i>THAP6</i>     | -4.394±0.297 | -4.758±0.464 | 6.22E-06 |
| cg11489580 | 4 | 76598793  | TSS200                    | <i>G3BP2</i>     | -4.026±0.241 | -4.226±0.368 | 1.47E-03 |
| cg22476251 | 4 | 76823701  | TSS200                    | <i>PPEF2</i>     | 1.736±0.325  | 1.52±0.442   | 8.28E-03 |
| cg03201604 | 4 | 76861293  | GeneBody                  | <i>NAAA</i>      | -4.653±0.354 | -4.939±0.409 | 7.54E-04 |
| cg11659747 | 4 | 77134585  | GeneBody/1st exon         | <i>SCARB2</i>    | -2.632±0.143 | -2.726±0.204 | 9.56E-03 |
| cg21656748 | 4 | 77135347  | GeneBody/5'UTR/1st exon   | <i>FAM47E</i>    | -5.773±0.588 | -6.31±0.656  | 1.50E-04 |
| cg22606062 | 4 | 77996244  | GeneBody/5'UTR/1st intron | <i>CCNI</i>      | -4.962±0.48  | -5.473±0.551 | 1.66E-05 |
| cg21548788 | 4 | 77997565  | TSS1500                   | <i>CCNI</i>      | -5.034±0.307 | -5.364±0.48  | 5.66E-05 |
| cg05409601 | 4 | 78077912  | TSS1500                   | <i>CCNG2</i>     | -4.366±0.481 | -4.809±0.487 | 1.02E-04 |
| cg17341358 | 4 | 78784105  | GeneBody/1st intron       | <i>MRPL1</i>     | -5.326±0.407 | -5.571±0.411 | 8.83E-03 |
| cg13843773 | 4 | 81256811  | TSS200                    | <i>C4orf22</i>   | -4.816±0.794 | -5.344±0.62  | 2.75E-03 |
| cg20947775 | 4 | 83720240  | TSS1500                   | <i>SCD5</i>      | -3.848±0.984 | -4.421±0.652 | 7.14E-03 |
| cg22461615 | 4 | 83821917  | GeneBody/5'UTR/1st exon   | <i>THAP9</i>     | -6.203±0.694 | -6.616±0.653 | 8.74E-03 |
| cg19763279 | 4 | 84256190  | GeneBody/5'UTR/1st intron | <i>HPSE</i>      | -4.319±0.428 | -4.62±0.603  | 5.21E-03 |
| cg22774012 | 4 | 84376821  | GeneBody/1st exon         | <i>HELQ</i>      | -5.081±0.391 | -5.373±0.403 | 1.35E-03 |
| cg17084361 | 4 | 85503668  | TSS1500                   | <i>CDS1</i>      | -4.219±0.318 | -4.484±0.444 | 9.87E-04 |
| cg23092072 | 4 | 87927706  | TSS1500                   | <i>AFF1</i>      | -5.14±0.46   | -5.54±0.482  | 2.41E-04 |
| cg02628930 | 4 | 88141617  | GeneBody/5'UTR/1st exon   | <i>KLHL8</i>     | -5.66±0.475  | -6.207±0.716 | 1.50E-05 |
| cg12733430 | 4 | 88141939  | TSS1500                   | <i>KLHL8</i>     | -4.378±0.373 | -4.631±0.51  | 6.45E-03 |
| cg13427055 | 4 | 89378005  | TSS1500                   | <i>HERC5</i>     | -4.992±0.311 | -5.36±0.622  | 6.88E-05 |
| cg20972543 | 4 | 89514177  | GeneBody/5'UTR/1st intron | <i>HERC3</i>     | -5.289±0.594 | -5.686±0.551 | 3.35E-03 |
| cg26226968 | 4 | 95129010  | GeneBody/5'UTR/1st exon   | <i>SMARCAD1</i>  | -5.095±0.452 | -5.459±0.477 | 6.40E-04 |
| cg16220802 | 4 | 100815812 | TSS200                    | <i>LAMTOR3</i>   | -5.051±0.488 | -5.374±0.552 | 5.16E-03 |
| cg11010122 | 4 | 100868318 | TSS1500                   | <i>DNAJB14</i>   | -4.506±0.435 | -4.833±0.578 | 2.41E-03 |
| cg04304927 | 4 | 103266554 | GeneBody/5'UTR/1st exon   | <i>SLC39A8</i>   | -5.478±0.337 | -5.867±0.435 | 6.89E-06 |
| cg01137708 | 4 | 103423368 | GeneBody/5'UTR/1st intron | <i>NFKB1</i>     | -5.229±0.425 | -5.521±0.429 | 2.95E-03 |
| cg16746737 | 4 | 103790299 | GeneBody/1st exon         | <i>CISD2</i>     | -5.933±0.468 | -6.235±0.453 | 4.78E-03 |
| cg02214188 | 4 | 104020949 | GeneBody/5'UTR/1st exon   | <i>BDH2</i>      | -1.48±0.526  | -0.964±0.569 | 4.88E-05 |
| cg19339841 | 4 | 104119196 | GeneBody/1st intron       | <i>CENPE</i>     | -5.399±0.386 | -5.686±0.398 | 1.40E-03 |
| cg19534879 | 4 | 105412299 | GeneBody                  | <i>CXXC4</i>     | -5.282±0.411 | -5.613±0.511 | 9.67E-04 |
| cg27313662 | 4 | 106395321 | TSS200                    | <i>PPA2</i>      | -5.069±0.407 | -5.319±0.406 | 7.29E-03 |
| cg15750102 | 4 | 107237686 | GeneBody/5'UTR/1st exon   | <i>AIMP1</i>     | -5.221±0.428 | -5.603±0.485 | 2.20E-04 |
| cg06100991 | 4 | 111119437 | GeneBody                  | <i>ELOVL6</i>    | -4.722±0.516 | -5.091±0.576 | 2.48E-03 |
| cg16978070 | 4 | 113067264 | GeneBody/1st intron       | <i>C4orf32</i>   | -4.652±0.401 | -4.997±0.478 | 3.97E-04 |
| cg17241657 | 4 | 113152573 | TSS1500                   | <i>AP1AR</i>     | -4.899±0.452 | -5.329±0.546 | 1.07E-04 |
| cg03109066 | 4 | 113153267 | GeneBody/1st exon         | <i>AP1AR</i>     | -5.948±0.585 | -6.369±0.637 | 2.23E-03 |
| cg20391984 | 4 | 114683822 | TSS1500                   | <i>CAMK2D</i>    | -5.67±0.641  | -6.093±0.616 | 3.91E-03 |
| cg07301822 | 4 | 119757621 | TSS1500                   | <i>SEC24D</i>    | -4.599±0.456 | -5.106±0.509 | 7.51E-06 |
| cg25969212 | 4 | 122722590 | GeneBody/1st exon         | <i>EXOSC9</i>    | -5.03±0.502  | -5.38±0.521  | 2.71E-03 |
| cg02832245 | 4 | 122722866 | GeneBody/1st intron       | <i>EXOSC9</i>    | -4.42±0.294  | -4.765±0.474 | 1.67E-05 |
| cg03990551 | 4 | 122791477 | GeneBody/5'UTR/1st exon   | <i>BBS7</i>      | -5.377±0.431 | -5.667±0.383 | 2.92E-03 |
| cg19987840 | 4 | 123844099 | GeneBody/5'UTR/1st exon   | <i>NUDT6</i>     | -4.642±0.42  | -4.957±0.491 | 1.71E-03 |
| cg20830531 | 4 | 123844416 | GeneBody/1st exon         | <i>SPATA5</i>    | -5.105±0.368 | -5.351±0.375 | 3.80E-03 |
| cg20088535 | 4 | 128802013 | TSS200                    | <i>PLK4</i>      | -5.974±0.543 | -6.327±0.689 | 7.65E-03 |
| cg07285838 | 4 | 128886005 | TSS1500                   | <i>C4orf29</i>   | -3.653±0.256 | -3.977±0.329 | 1.27E-06 |
| cg03883519 | 4 | 128886524 | GeneBody/5'UTR/1st exon   | <i>C4orf29</i>   | -3.93±0.437  | -4.28±0.425  | 5.59E-04 |
| cg00488718 | 4 | 128887044 | GeneBody/5'UTR/1st intron | <i>MFSD8</i>     | -4.972±0.657 | -5.459±0.651 | 1.34E-03 |
| cg10149329 | 4 | 128887145 | TSS200                    | <i>MFSD8</i>     | -4.123±0.289 | -4.308±0.357 | 8.05E-03 |
| cg10640379 | 4 | 128981918 | TSS1500                   | <i>LARP1B</i>    | -4.834±0.472 | -5.211±0.556 | 9.16E-04 |
| cg00783759 | 4 | 128983441 | GeneBody/5'UTR/1st intron | <i>LARP1B</i>    | -5.457±0.608 | -5.904±0.658 | 1.76E-03 |
| cg17280624 | 4 | 129208725 | GeneBody/1st exon         | <i>PGRM2</i>     | -5.228±0.689 | -5.675±0.701 | 4.94E-03 |
| cg10871523 | 4 | 130014369 | GeneBody/5'UTR/1st exon   | <i>SLT1</i>      | -5.636±0.716 | -6.125±0.777 | 3.56E-03 |
| cg03519303 | 4 | 139936796 | TSS200                    | <i>CCRN4L</i>    | -5.122±0.47  | -5.525±0.522 | 3.41E-04 |
| cg10976673 | 4 | 139937474 | GeneBody/1st intron       | <i>CCRN4L</i>    | -4.459±0.336 | -4.771±0.45  | 2.21E-04 |
| cg05088386 | 4 | 140060774 | TSS200                    | <i>ELF2</i>      | 2.02±0.303   | 2.265±0.386  | 1.12E-03 |
| cg22127491 | 4 | 140217063 | GeneBody/5'UTR            | <i>NDUFC1</i>    | -4.588±0.431 | -5.017±0.681 | 1.89E-04 |
| cg20184165 | 4 | 140222646 | TSS200                    | <i>NAA15</i>     | -6.018±0.506 | -6.377±0.553 | 2.59E-03 |
| cg10377451 | 4 | 140375014 | GeneBody/5'UTR/1st exon   | <i>RAB33B</i>    | -6.033±0.579 | -6.454±0.631 | 2.00E-03 |
| cg25945961 | 4 | 140477705 | TSS200                    | <i>SETD7</i>     | -5.301±0.564 | -5.691±0.596 | 3.00E-03 |

|            |   |           |                           |              |              |              |          |
|------------|---|-----------|---------------------------|--------------|--------------|--------------|----------|
| cg25323711 | 4 | 141349096 | TSS1500                   | CLGN         | -4.264±0.53  | -4.709±0.561 | 3.87E-04 |
| cg13132204 | 4 | 141445677 | GeneBody/5'UTR/1st intron | ELMOD2       | -5.788±0.466 | -6.238±0.441 | 4.64E-05 |
| cg20716945 | 4 | 144106096 | GeneBody/5'UTR/1st exon   | USP38        | -5.795±0.614 | -6.283±0.643 | 7.17E-04 |
| cg01171588 | 4 | 144106478 | GeneBody/5'UTR/1st exon   | USP38        | -5.742±0.355 | -6.143±0.582 | 3.54E-05 |
| cg01278696 | 4 | 144434369 | TSS1500                   | SMARCA5      | -4.583±0.405 | -4.877±0.414 | 1.78E-03 |
| cg16091845 | 4 | 144434637 | GeneBody/5'UTR/1st exon   | SMARCA5      | -5.577±0.446 | -6.204±0.638 | 2.63E-07 |
| cg00375964 | 4 | 146019130 | TSS200                    | ABCE1        | -5.02±0.531  | -5.415±0.566 | 1.48E-03 |
| cg22495162 | 4 | 147096787 | TSS200                    | LSM6         | -5.008±0.696 | -5.673±0.782 | 8.05E-05 |
| cg26484333 | 4 | 148538641 | GeneBody/5'UTR/1st exon   | TMEM184C     | -5.146±0.658 | -5.61±0.588  | 1.72E-03 |
| cg15810326 | 4 | 148605127 | GeneBody/1st exon         | PRMT10       | -4.244±0.589 | -4.687±0.52  | 9.41E-04 |
| cg13996731 | 4 | 149363522 | GeneBody/5'UTR/1st exon   | NR3C2        | -4.237±0.252 | -4.527±0.329 | 7.27E-06 |
| cg20850582 | 4 | 151936449 | TSS200                    | LRBA         | -4.28±0.267  | -4.444±0.239 | 6.44E-03 |
| cg13219107 | 4 | 151937234 | TSS1500                   | LRBA         | -4.415±0.355 | -4.661±0.223 | 1.48E-03 |
| cg04876451 | 4 | 152682126 | GeneBody/1st exon         | PET112       | -5.716±0.533 | -6.063±0.449 | 3.67E-03 |
| cg05287690 | 4 | 153456344 | GeneBody/5'UTR/1st exon   | FBXW7        | -2.478±0.193 | -2.652±0.229 | 2.08E-04 |
| cg06649520 | 4 | 153700671 | GeneBody/5'UTR/1st exon   | TIGD4        | -6.005±0.45  | -6.388±0.491 | 3.48E-04 |
| cg13825058 | 4 | 154266213 | GeneBody/1st intron       | MND1         | -5.276±0.376 | -5.824±0.509 | 8.81E-08 |
| cg10484485 | 4 | 154387599 | GeneBody/1st exon         | KIAA0922     | -5.28±0.325  | -5.511±0.433 | 4.24E-03 |
| cg08724517 | 4 | 156298204 | TSS200                    | MAP9         | -3.409±0.449 | -3.772±0.503 | 6.97E-04 |
| cg27507704 | 4 | 159593171 | GeneBody/5'UTR/1st exon   | C4orf46      | -6.346±0.518 | -6.864±0.667 | 6.56E-05 |
| cg25624712 | 4 | 164088003 | GeneBody/5'UTR/1st exon   | NAF1         | -5.889±0.685 | -6.402±0.691 | 1.27E-03 |
| cg05745457 | 4 | 164394816 | GeneBody/1st exon         | TKTL2        | 2.417±0.242  | 2.086±0.328  | 3.60E-07 |
| cg23679141 | 4 | 165118930 | TSS200                    | ANP32C       | -1.975±0.505 | -2.374±0.592 | 1.01E-03 |
| cg13260633 | 4 | 169931597 | TSS200                    | CBR4         | -5.67±0.466  | -6.118±0.586 | 1.10E-04 |
| cg01654582 | 4 | 171011577 | TSS1500                   | AADAT        | -3.482±0.612 | -3.881±0.653 | 5.14E-03 |
| cg21549904 | 4 | 174090558 | GeneBody/1st intron       | GALNT7       | -4.861±0.397 | -5.122±0.501 | 6.84E-03 |
| cg25086702 | 4 | 174255559 | GeneBody/5'UTR/1st exon   | HMG2         | -5.157±0.306 | -5.45±0.383  | 1.15E-04 |
| cg13515674 | 4 | 174255654 | TSS200                    | HMG2         | -5.531±0.417 | -5.899±0.58  | 4.80E-04 |
| cg16718094 | 4 | 174291993 | TSS200                    | SAP30        | -5.502±0.681 | -6.073±0.592 | 2.67E-04 |
| cg12648583 | 4 | 175205248 | GeneBody/5'UTR/1st exon   | FBXO8        | -4.493±0.423 | -4.839±0.529 | 8.37E-04 |
| cg14602164 | 4 | 175205422 | TSS200                    | FBXO8        | -3.759±0.463 | -4.094±0.385 | 1.28E-03 |
| cg19639622 | 4 | 176923800 | GeneBody/5'UTR/1st exon   | GPM6A        | -4.211±0.628 | -4.649±0.655 | 2.73E-03 |
| cg11674404 | 4 | 176987359 | GeneBody/5'UTR/1st intron | WDR17        | -3.347±0.957 | -4.006±0.957 | 2.83E-03 |
| cg05060602 | 4 | 183838922 | TSS1500                   | DCTD         | -4.476±0.328 | -4.85±0.432  | 9.13E-06 |
| cg14892066 | 4 | 183839263 | TSS1500                   | DCTD         | -4.793±0.455 | -5.157±0.546 | 9.16E-04 |
| cg07731916 | 4 | 185395553 | GeneBody/5'UTR/1st exon   | IRF2         | -2.63±0.512  | -3.253±0.802 | 8.79E-06 |
| cg25255854 | 4 | 185396298 | TSS1500                   | IRF2         | -5.543±0.475 | -5.848±0.562 | 7.12E-03 |
| cg20811273 | 4 | 185570979 | GeneBody/5'UTR/1st exon   | CCDC111      | -4.358±0.377 | -4.634±0.472 | 2.59E-03 |
| cg15171237 | 4 | 185571958 | GeneBody/5'UTR/1st intron | CCDC111      | 2.419±0.415  | 2.661±0.291  | 7.36E-03 |
| cg06600412 | 4 | 185655239 | GeneBody/5'UTR/1st exon   | MLF1IP       | -6.227±0.552 | -6.688±0.613 | 4.56E-04 |
| cg07122495 | 4 | 185655388 | TSS200                    | MLF1IP       | -5.026±0.416 | -5.38±0.542  | 5.76E-04 |
| cg24697682 | 4 | 186064225 | TSS200                    | SLC25A4      | -5.242±0.636 | -5.737±0.505 | 5.61E-04 |
| cg27583030 | 4 | 186064515 | GeneBody/5'UTR/1st exon   | SLC25A4      | -2.553±0.363 | -2.815±0.278 | 1.21E-03 |
| cg19905754 | 4 | 186317888 | GeneBody/5'UTR/1st exon   | ANKRD37      | -5.698±0.372 | -6.079±0.654 | 2.30E-04 |
| cg12697789 | 4 | 186990425 | GeneBody/5'UTR/1st intron | TLR3         | -3.205±0.386 | -3.473±0.46  | 3.76E-03 |
| cg12570787 | 5 | 219185    | GeneBody/1st intron       | SDHA         | -4.269±0.51  | -4.959±0.606 | 2.62E-07 |
| cg10988561 | 5 | 271254    | TSS1500                   | PDCD6        | -2.582±0.362 | -3.014±0.666 | 3.27E-05 |
| cg07020407 | 5 | 271807    | GeneBody/5'UTR/1st exon   | PDCD6        | -5.391±0.533 | -5.789±0.542 | 1.31E-03 |
| cg23091824 | 5 | 1112355   | TSS200                    | SLC12A7      | -3.94±0.669  | -4.363±0.803 | 8.27E-03 |
| cg19421752 | 5 | 1225224   | TSS1500                   | SLC6A18      | -0.679±0.648 | -1.105±0.861 | 7.89E-03 |
| cg26721993 | 5 | 1344908   | GeneBody/1st exon         | CLPTM1L      | -6.153±0.491 | -6.571±0.64  | 6.02E-04 |
| cg24003306 | 5 | 1799717   | GeneBody/5'UTR/1st intron | MRPL36       | -5.218±0.579 | -5.679±0.621 | 7.34E-04 |
| cg25632001 | 5 | 1799723   | GeneBody/5'UTR/1st intron | MRPL36       | -4.238±0.331 | -4.55±0.469  | 2.32E-04 |
| cg01541629 | 5 | 6633111   | GeneBody/5'UTR/1st exon   | NSUN2        | -4.981±0.57  | -5.423±0.697 | 1.37E-03 |
| cg09576882 | 5 | 6714987   | GeneBody/5'UTR/1st intron | PAPD7        | -2.941±0.158 | -3.059±0.278 | 6.75E-03 |
| cg03702236 | 5 | 9546755   | GeneBody/1st intron       | LOC100505806 | -2.447±1.015 | -3.079±0.704 | 4.37E-03 |
| cg25484373 | 5 | 10250304  | GeneBody/5'UTR/1st exon   | CCT5         | -4.904±0.412 | -5.19±0.512  | 4.18E-03 |
| cg20126158 | 5 | 10353332  | TSS1500                   | 43896        | -4.605±0.468 | -5.134±0.527 | 6.02E-06 |
| cg02227605 | 5 | 10441490  | GeneBody/1st intron       | ROPN1L-AS1   | -2.965±0.48  | -3.288±0.578 | 5.13E-03 |
| cg21046940 | 5 | 10760858  | GeneBody/1st intron       | DAP          | -5.045±0.467 | -5.322±0.409 | 8.05E-03 |
| cg07817783 | 5 | 10761669  | TSS1500                   | DAP          | -5.478±0.53  | -6.073±0.803 | 2.33E-05 |
| cg24602243 | 5 | 14144425  | GeneBody/1st intron       | TRIO         | -3.4±0.353   | -3.675±0.368 | 8.59E-04 |
| cg16188038 | 5 | 16465766  | GeneBody/1st exon         | ZNF622       | -5.273±0.429 | -5.707±0.556 | 5.56E-05 |
| cg19796273 | 5 | 16936868  | TSS1500                   | MYO10        | -3.564±0.479 | -3.888±0.663 | 7.03E-03 |
| cg08198480 | 5 | 17216222  | TSS1500                   | BASP1        | -3.048±0.518 | -3.539±0.613 | 1.07E-04 |
| cg08771731 | 5 | 17216434  | TSS1500                   | BASP1        | -4.368±0.375 | -4.696±0.693 | 1.99E-03 |
| cg07290435 | 5 | 24644893  | GeneBody/5'UTR/1st exon   | CDH10        | -2.085±0.658 | -2.538±0.804 | 4.49E-03 |
| cg15929201 | 5 | 31531945  | GeneBody/5'UTR/1st intron | DROSHA       | -4.579±0.277 | -4.879±0.409 | 3.74E-05 |
| cg17751867 | 5 | 32173610  | GeneBody/1st intron       | GOLPH3       | -5.624±0.556 | -6.156±0.577 | 6.30E-05 |
| cg03522216 | 5 | 32174578  | TSS200                    | GOLPH3       | -5.145±0.51  | -5.545±0.603 | 1.12E-03 |
| cg01236137 | 5 | 32585526  | TSS200                    | SUB1         | -3.583±0.524 | -3.964±0.748 | 4.06E-03 |
| cg15288179 | 5 | 32585739  | GeneBody/5'UTR/1st intron | SUB1         | -5.926±0.765 | -6.401±0.753 | 6.62E-03 |
| cg12168164 | 5 | 33441063  | GeneBody/1st exon         | TARS         | -5.819±0.569 | -6.163±0.597 | 9.04E-03 |
| cg01091448 | 5 | 34008127  | GeneBody/5'UTR/1st exon   | AMACR        | -5.414±0.528 | -5.766±0.479 | 3.32E-03 |
| cg12346515 | 5 | 34008431  | TSS1500                   | AMACR        | -4.182±0.311 | -4.536±0.363 | 6.11E-06 |
| cg03332113 | 5 | 34656078  | TSS1500                   | RAI14        | -4.114±0.39  | -4.393±0.513 | 3.69E-03 |
| cg01146980 | 5 | 34930244  | GeneBody/1st intron       | DNAJC21      | -6.655±0.565 | -6.047±0.595 | 2.91E-03 |
| cg15841415 | 5 | 36606520  | GeneBody/5'UTR/1st exon   | SLC1A3       | -3.076±0.842 | -3.602±0.762 | 5.64E-03 |
| cg26929490 | 5 | 36877626  | GeneBody/5'UTR/1st intron | NIPBL        | -5.845±0.677 | -6.276±0.556 | 4.25E-03 |
| cg26475085 | 5 | 38845600  | TSS1500                   | OSMR         | -4.214±0.629 | -4.621±0.699 | 6.05E-03 |
| cg15873715 | 5 | 39425138  | GeneBody/5'UTR/1st exon   | DAB2         | -3.902±0.726 | -4.385±0.63  | 3.08E-03 |
| cg08164315 | 5 | 40679182  | TSS1500                   | PTGER4       | -4.605±0.459 | -4.962±0.645 | 2.07E-03 |
| cg10850119 | 5 | 41925229  | TSS200                    | FBXO4        | -5.024±0.324 | -5.264±0.365 | 1.78E-03 |
| cg22359217 | 5 | 41925772  | GeneBody/1st intron       | FBXO4        | -4.784±0.363 | -5.069±0.551 | 2.45E-03 |
| cg11057497 | 5 | 43313384  | GeneBody/5'UTR/1st intron | HMGCS1       | -4.569±0.444 | -5.037±0.652 | 5.35E-05 |
| cg26088104 | 5 | 43515152  | GeneBody/5'UTR/1st exon   | C5orf34      | -4.564±0.669 | -5.027±0.666 | 2.72E-03 |
| cg14865516 | 5 | 43557751  | TSS1500                   | PAIP1        | -4.148±0.401 | -4.602±0.522 | 9.70E-06 |
| cg08052882 | 5 | 43602666  | TSS200                    | NNT          | -4.271±0.665 | -4.66±0.371  | 6.91E-03 |
| cg26317056 | 5 | 43602919  | GeneBody/5'UTR/1st exon   | NNT          | -4.79±0.611  | -5.35±0.439  | 6.28E-05 |
| cg26781886 | 5 | 49737336  | TSS200                    | EMB          | -3.646±0.241 | -3.79±0.257  | 9.84E-03 |
| cg15676241 | 5 | 52285231  | GeneBody/1st exon         | ITGA2        | -2.456±0.187 | -2.596±0.232 | 2.02E-03 |
| cg09759260 | 5 | 52285480  | GeneBody/1st intron       | ITGA2        | -3.734±0.25  | -3.973±0.38  | 2.64E-04 |
| cg21540749 | 5 | 52405349  | GeneBody/1st intron       | MOCS2        | -5.044±0.539 | -5.414±0.466 | 2.32E-03 |
| cg19844287 | 5 | 52405864  | GeneBody/1st exon         | LOC257396    | -4.949±0.385 | -5.187±0.45  | 9.41E-03 |
| cg07707227 | 5 | 54469532  | TSS1500                   | CDC20B       | -4.215±0.521 | -4.597±0.495 | 1.42E-03 |

|            |   |           |                           |                     |              |              |          |
|------------|---|-----------|---------------------------|---------------------|--------------|--------------|----------|
| cg09230732 | 5 | 54603874  | GeneBody/1st exon         | <i>SKIV2L2</i>      | -4.596±0.47  | -4.889±0.548 | 8.79E-03 |
| cg09277365 | 5 | 55008523  | TSS1500                   | <i>SLC38A9</i>      | -4.052±0.281 | -4.228±0.282 | 6.57E-03 |
| cg13576061 | 5 | 55291172  | GeneBody/1st exon         | <i>FLJ31104</i>     | -4.533±0.54  | -4.968±0.539 | 5.42E-04 |
| cg25159610 | 5 | 57576802  | TSS1500                   | <i>PLK2</i>         | -4.723±0.496 | -5.272±0.678 | 1.75E-05 |
| cg11649654 | 5 | 60240952  | TSS200                    | <i>NDUFAF2</i>      | -4.48±0.292  | -4.291±0.368 | 7.94E-03 |
| cg00581156 | 5 | 61699416  | GeneBody/1st intron       | <i>DIMT1</i>        | -5.454±0.475 | -5.797±0.5   | 1.99E-03 |
| cg14700821 | 5 | 64777802  | TSS200                    | <i>ADAMTS6</i>      | -4.466±0.546 | -5.013±0.737 | 7.95E-05 |
| cg08307039 | 5 | 64920116  | GeneBody/5'UTR/1st exon   | <i>TRIM23</i>       | -4.413±0.469 | -4.773±0.464 | 9.18E-04 |
| cg25438054 | 5 | 65017496  | GeneBody/5'UTR/1st intron | <i>SGTB</i>         | -4.039±0.317 | -4.347±0.408 | 1.00E-04 |
| cg07172256 | 5 | 65220910  | TSS1500                   | <i>ERBB2IP</i>      | -5.227±0.394 | -5.487±0.424 | 4.90E-03 |
| cg22009138 | 5 | 65222522  | GeneBody/5'UTR/1st exon   | <i>ERBB2IP</i>      | -4.007±0.412 | -4.403±0.621 | 2.38E-04 |
| cg03989322 | 5 | 68389537  | TSS1500                   | <i>SLC30A5</i>      | -4.529±0.431 | -5.008±0.548 | 1.19E-05 |
| cg26324201 | 5 | 68530549  | TSS200                    | <i>CDK7</i>         | -3.816±0.412 | -4.117±0.597 | 4.25E-03 |
| cg16793150 | 5 | 71616026  | GeneBody/1st exon         | <i>MRPS27</i>       | -5.758±0.565 | -6.203±0.546 | 6.63E-04 |
| cg12026956 | 5 | 72112008  | TSS1500                   | <i>TNPO1</i>        | -3.642±0.399 | -4.043±0.516 | 6.34E-05 |
| cg19220754 | 5 | 72112588  | GeneBody/1st intron       | <i>TNPO1</i>        | -5.385±0.386 | -5.832±0.622 | 2.05E-05 |
| cg20951821 | 5 | 73937141  | GeneBody/5'UTR/1st exon   | <i>ENC1</i>         | -4.833±0.376 | -5.341±0.497 | 3.84E-07 |
| cg08548086 | 5 | 73980929  | TSS200                    | <i>HEXB</i>         | -5.124±0.558 | -5.498±0.62  | 4.43E-03 |
| cg20482071 | 5 | 73981186  | GeneBody/1st exon         | <i>HEXB</i>         | -6.235±0.575 | -6.85±0.636  | 1.43E-05 |
| cg02162412 | 5 | 74632926  | TSS200                    | <i>HMGCR</i>        | -5.248±0.381 | -5.599±0.553 | 3.46E-04 |
| cg00165981 | 5 | 74808039  | TSS1500                   | <i>COL4A3BP</i>     | -4.014±0.563 | -4.361±0.543 | 6.95E-03 |
| cg03132911 | 5 | 75698732  | TSS1500                   | <i>IQGAP2</i>       | -4.936±0.721 | -5.525±0.815 | 6.20E-04 |
| cg06252849 | 5 | 76326040  | TSS200                    | <i>AGGF1</i>        | -3.67±0.489  | -3.993±0.491 | 4.17E-03 |
| cg21985356 | 5 | 76383200  | TSS200                    | <i>ZBED3</i>        | -4.536±0.314 | -4.892±0.457 | 1.62E-05 |
| cg23152667 | 5 | 77072348  | TSS200                    | <i>TBCA</i>         | -3.126±0.424 | -2.747±0.439 | 1.67E-04 |
| cg15009698 | 5 | 77590494  | GeneBody/5'UTR/1st exon   | <i>AP3B1</i>        | -4.464±0.46  | -4.926±0.403 | 2.18E-05 |
| cg12126786 | 5 | 77656518  | GeneBody/1st exon         | <i>SCAMP1</i>       | -5.034±0.495 | -5.352±0.559 | 6.66E-03 |
| cg17758148 | 5 | 78573641  | GeneBody/1st intron       | <i>JMY</i>          | 1.625±0.581  | 1.128±0.628  | 3.24E-04 |
| cg07526021 | 5 | 79950611  | GeneBody/1st exon         | <i>MSH3</i>         | -5.3±0.427   | -5.685±0.441 | 1.46E-04 |
| cg16993440 | 5 | 80597283  | GeneBody/1st exon         | <i>LOC100131067</i> | -4.364±0.359 | -4.736±0.404 | 2.41E-05 |
| cg01491225 | 5 | 80597551  | GeneBody/5'UTR/1st intron | <i>ZCCHC9</i>       | -4.823±0.353 | -5.142±0.531 | 5.02E-04 |
| cg22913584 | 5 | 81046758  | GeneBody/1st intron       | <i>SSBP2</i>        | -6.751±0.561 | -7.272±0.727 | 1.95E-04 |
| cg07833035 | 5 | 81573845  | GeneBody/1st intron       | <i>RPS23</i>        | -5.07±0.409  | -5.621±0.505 | 3.06E-07 |
| cg25243721 | 5 | 82373346  | GeneBody/5'UTR/1st exon   | <i>XRCC4</i>        | -4.258±0.318 | -4.462±0.297 | 4.78E-03 |
| cg16160720 | 5 | 86563744  | TSS1500                   | <i>RASA1</i>        | -4.446±0.228 | -4.783±0.372 | 2.17E-07 |
| cg15664067 | 5 | 86564490  | TSS1500                   | <i>RASA1</i>        | -3.833±0.336 | -4.132±0.415 | 2.90E-04 |
| cg09299307 | 5 | 86709023  | TSS200                    | <i>CCNH</i>         | -4.262±0.318 | -4.51±0.403  | 1.41E-03 |
| cg10215884 | 5 | 87564247  | GeneBody/1st intron       | <i>TMEM161B</i>     | -3.22±0.334  | -3.482±0.532 | 2.97E-03 |
| cg18287975 | 5 | 88178977  | GeneBody/5'UTR/1st exon   | <i>MEF2C</i>        | -4.891±0.511 | -5.22±0.651  | 8.29E-03 |
| cg14993293 | 5 | 89705579  | GeneBody/5'UTR/1st exon   | <i>CETN3</i>        | -4.582±0.647 | -4.976±0.651 | 8.15E-03 |
| cg08935243 | 5 | 89705635  | TSS200                    | <i>CETN3</i>        | -5.494±0.455 | -5.821±0.467 | 1.99E-03 |
| cg19369775 | 5 | 89770455  | GeneBody/5'UTR/1st exon   | <i>MBLAC2</i>       | -4.924±0.422 | -5.38±0.521  | 1.65E-05 |
| cg20813773 | 5 | 93953866  | GeneBody/5'UTR/1st intron | <i>KIAA0825</i>     | -5.118±0.407 | -5.414±0.427 | 1.86E-03 |
| cg03975345 | 5 | 93954303  | GeneBody/5'UTR/1st exon   | <i>KIAA0825</i>     | -6.153±0.602 | -6.627±0.594 | 6.93E-04 |
| cg00849368 | 5 | 94890411  | GeneBody/5'UTR/1st intron | <i>TTC37</i>        | -5.065±0.684 | -5.543±0.694 | 2.57E-03 |
| cg24274600 | 5 | 95068816  | TSS200                    | <i>RHOBTB3</i>      | -5.243±0.411 | -5.754±0.64  | 4.77E-06 |
| cg14161426 | 5 | 96143592  | GeneBody/5'UTR/1st exon   | <i>ERAP1</i>        | -5.341±0.423 | -5.672±0.514 | 1.22E-03 |
| cg16746462 | 5 | 96270438  | TSS1500                   | <i>LNPEP</i>        | -4.241±0.688 | -4.725±0.682 | 2.27E-03 |
| cg04380513 | 5 | 100238983 | GeneBody/5'UTR/1st exon   | <i>ST8SIA4</i>      | -4.314±0.806 | -4.875±0.746 | 2.27E-03 |
| cg22603964 | 5 | 109024897 | TSS1500                   | <i>MAN2A1</i>       | -5.056±0.386 | -5.449±0.541 | 7.09E-05 |
| cg04020816 | 5 | 109025456 | GeneBody/5'UTR/1st exon   | <i>MAN2A1</i>       | -5.07±0.351  | -5.454±0.481 | 2.09E-05 |
| cg27610250 | 5 | 110074219 | TSS1500                   | <i>SLC25A46</i>     | -5.14±0.376  | -5.596±0.748 | 4.48E-05 |
| cg12871124 | 5 | 110848106 | GeneBody/5'UTR/1st exon   | <i>STARD4</i>       | -5.487±0.503 | -6.019±0.562 | 1.74E-05 |
| cg09868597 | 5 | 112849442 | GeneBody/5'UTR/1st exon   | <i>YTHDC2</i>       | -3.712±0.169 | -3.834±0.222 | 3.48E-03 |
| cg25584626 | 5 | 119800234 | GeneBody/5'UTR/1st exon   | <i>PRR16</i>        | -2.751±1.402 | -3.77±1.224  | 1.32E-03 |
| cg11960393 | 5 | 121414172 | TSS200                    | <i>LOX</i>          | -3.954±0.668 | -4.396±0.496 | 2.78E-03 |
| cg01064957 | 5 | 122110867 | GeneBody/5'UTR/1st exon   | <i>SNX2</i>         | -4.049±0.262 | -4.386±0.356 | 1.24E-06 |
| cg20470275 | 5 | 122180934 | TSS1500                   | <i>SNX24</i>        | -4.979±0.27  | -5.321±0.43  | 4.00E-06 |
| cg20708411 | 5 | 122847581 | TSS1500                   | <i>CSNK1G3</i>      | -4.309±0.429 | -4.655±0.596 | 1.37E-03 |
| cg15165084 | 5 | 125759291 | GeneBody/5'UTR/1st exon   | <i>GRAMD3</i>       | -5.319±0.369 | -5.781±0.492 | 1.76E-06 |
| cg20986134 | 5 | 126112439 | GeneBody/5'UTR/1st exon   | <i>LMNB1</i>        | -4.468±0.46  | -4.947±0.695 | 7.63E-05 |
| cg25084220 | 5 | 126366197 | GeneBody/5'UTR/1st exon   | <i>43893</i>        | -5.977±0.6   | -6.377±0.643 | 3.66E-03 |
| cg15851800 | 5 | 126853405 | GeneBody/5'UTR/1st exon   | <i>PRRC1</i>        | -4.751±0.459 | -5.062±0.502 | 3.90E-03 |
| cg06465021 | 5 | 127418547 | GeneBody/1st intron       | <i>FLJ33630</i>     | -4.496±0.254 | -4.646±0.235 | 9.22E-03 |
| cg27372468 | 5 | 131630212 | GeneBody/5'UTR/1st exon   | <i>SLC22A4</i>      | -4.84±0.399  | -5.287±0.534 | 1.31E-05 |
| cg14196790 | 5 | 131705035 | TSS1500                   | <i>SLC22A5</i>      | -2.846±0.327 | -3.066±0.412 | 5.89E-03 |
| cg24974130 | 5 | 131893006 | GeneBody/5'UTR/1st exon   | <i>RAD50</i>        | -4.68±0.309  | -5.007±0.509 | 9.55E-05 |
| cg10458581 | 5 | 132202244 | TSS200                    | <i>UQCRCQ</i>       | -5.681±0.593 | -6.047±0.431 | 4.90E-03 |
| cg05040447 | 5 | 132202635 | GeneBody                  | <i>UQCRCQ</i>       | -5.573±0.45  | -5.859±0.523 | 7.49E-03 |
| cg22065439 | 5 | 133304001 | GeneBody/1st intron       | <i>C5orf15</i>      | -4.404±0.48  | -4.7±0.56    | 9.40E-03 |
| cg01116966 | 5 | 133450017 | TSS1500                   | <i>TCF7</i>         | -5.563±0.457 | -6.009±1.057 | 2.28E-03 |
| cg26074851 | 5 | 133512410 | GeneBody/5'UTR/1st intron | <i>SKP1</i>         | -5.655±0.571 | -6.084±0.655 | 1.62E-03 |
| cg21703138 | 5 | 133561950 | GeneBody/5'UTR/1st exon   | <i>PPP2CA</i>       | -5.441±0.45  | -5.812±0.609 | 9.82E-04 |
| cg27543230 | 5 | 133562604 | TSS1500                   | <i>PPP2CA</i>       | -3.906±0.441 | -4.233±0.511 | 1.92E-03 |
| cg09693433 | 5 | 133702574 | GeneBody/5'UTR/1st intron | <i>CDKL3</i>        | -4.7±0.267   | -4.869±0.271 | 6.14E-03 |
| cg04590931 | 5 | 133861743 | TSS200                    | <i>PHF15</i>        | -5.808±0.377 | -6.434±0.742 | 8.77E-08 |
| cg00520708 | 5 | 134181266 | TSS200                    | <i>C5orf24</i>      | -2.048±0.439 | -2.518±0.825 | 2.35E-04 |
| cg02770814 | 5 | 137368293 | GeneBody/5'UTR/1st intron | <i>FAM13B</i>       | -5.179±0.361 | -5.446±0.339 | 1.22E-03 |
| cg07430605 | 5 | 137514261 | GeneBody/1st intron       | <i>BRD8</i>         | -4.953±0.237 | -5.101±0.235 | 8.73E-03 |
| cg13581941 | 5 | 137548929 | GeneBody/1st exon         | <i>CDC23</i>        | -5.945±0.468 | -6.339±0.501 | 3.76E-04 |
| cg14784788 | 5 | 137667435 | GeneBody/5'UTR/1st exon   | <i>CDC25C</i>       | -4.782±0.305 | -5.103±0.54  | 1.72E-04 |
| cg22748850 | 5 | 137667638 | TSS200                    | <i>CDC25C</i>       | -4.468±0.241 | -4.693±0.376 | 3.93E-04 |
| cg18986273 | 5 | 137673771 | GeneBody/5'UTR/1st exon   | <i>FAM53C</i>       | -3.142±0.578 | -3.64±0.631  | 3.16E-04 |
| cg26069252 | 5 | 137800343 | TSS1500                   | <i>EGR1</i>         | -4.439±0.273 | -4.82±0.389  | 3.03E-07 |
| cg13859216 | 5 | 137910711 | GeneBody/1st intron       | <i>HSPA9</i>        | -5.304±0.438 | -5.647±0.389 | 6.20E-04 |
| cg07874155 | 5 | 138089656 | GeneBody/5'UTR/1st intron | <i>CTNNA1</i>       | -5.546±0.376 | -5.91±0.553  | 1.96E-04 |
| cg13326338 | 5 | 138463619 | GeneBody/5'UTR            | <i>SIL1</i>         | 3.756±0.318  | 3.952±0.328  | 7.82E-03 |
| cg22409383 | 5 | 138609379 | TSS200                    | <i>SNHG4</i>        | -5.582±0.546 | -5.933±0.718 | 9.20E-03 |
| cg06302803 | 5 | 138609953 | GeneBody/1st intron       | <i>SNHG4</i>        | -4.46±0.39   | -4.934±0.655 | 1.18E-05 |
| cg26392924 | 5 | 138718812 | GeneBody/1st intron       | <i>SLC23A1</i>      | -2.747±0.383 | -3.001±0.495 | 6.79E-03 |
| cg18805835 | 5 | 138775054 | GeneBody/1st intron       | <i>DNAJC18</i>      | -2.219±0.163 | -2.393±0.248 | 5.35E-05 |
| cg10356060 | 5 | 138775106 | GeneBody/1st exon         | <i>DNAJC18</i>      | -4.852±0.603 | -5.348±0.655 | 5.21E-04 |
| cg06005644 | 5 | 138940959 | GeneBody/5'UTR/1st exon   | <i>UBE2D2</i>       | -5.301±0.595 | -5.819±0.48  | 1.47E-04 |
| cg15563057 | 5 | 139493612 | TSS200                    | <i>PURA</i>         | -4.509±0.417 | -4.842±0.557 | 1.34E-03 |
| cg25132078 | 5 | 139682347 | GeneBody/1st intron       | <i>PFDN1</i>        | -4.542±0.412 | -5.031±0.464 | 2.38E-06 |

|            |   |           |                           |            |              |              |          |
|------------|---|-----------|---------------------------|------------|--------------|--------------|----------|
| cg20868410 | 5 | 139726466 | TSS1500                   | HBEGF      | -4.58±0.269  | -4.861±0.426 | 9.79E-05 |
| cg08918431 | 5 | 139781174 | TSS1500                   | ANKHD1     | -5.63±0.539  | -6.047±0.572 | 9.70E-04 |
| cg20021244 | 5 | 139944115 | GeneBody/5'UTR/1st exon   | APBB3      | -6.187±0.561 | -6.802±0.656 | 1.11E-05 |
| cg02995853 | 5 | 139944272 | TSS200                    | APBB3      | -4.135±0.312 | -4.467±0.41  | 2.65E-05 |
| cg06994793 | 5 | 140018911 | TSS200                    | TMCO6      | -5.228±0.284 | -5.62±0.629  | 1.31E-05 |
| cg00916199 | 5 | 140019287 | GeneBody/1st intron       | TMCO6      | -5.178±0.375 | -5.465±0.582 | 3.53E-03 |
| cg09507928 | 5 | 140027484 | GeneBody/1st exon         | MIR3655    | -5.773±0.647 | -6.158±0.566 | 7.91E-03 |
| cg06177968 | 5 | 140044542 | GeneBody/1st exon         | WDR55      | -3.94±0.237  | -4.178±0.305 | 6.27E-05 |
| cg06225581 | 5 | 140080094 | GeneBody/1st intron       | ZMAT2      | -4.306±0.342 | -4.593±0.469 | 8.61E-04 |
| cg02087637 | 5 | 140557483 | GeneBody/5'UTR/1st exon   | PCDHB8     | -1.846±0.519 | -2.154±0.522 | 9.82E-03 |
| cg04284814 | 5 | 141016114 | GeneBody                  | HDAC3      | -4.433±0.314 | -4.666±0.499 | 4.89E-03 |
| cg11064797 | 5 | 141016628 | GeneBody/5'UTR/1st exon   | RELL2      | -3.992±0.202 | -4.314±0.337 | 4.85E-08 |
| cg22764338 | 5 | 141257604 | GeneBody/1st intron       | PCDH1      | -3.615±0.312 | -3.86±0.45   | 2.07E-03 |
| cg09985635 | 5 | 141258958 | TSS1500                   | PCDH1      | -4.624±0.477 | -5.016±0.433 | 3.61E-04 |
| cg08587542 | 5 | 141303900 | GeneBody/1st intron       | KIAA0141   | -3.371±0.367 | -3.639±0.464 | 2.73E-03 |
| cg19704039 | 5 | 141392512 | GeneBody/5'UTR/1st intron | GNPDA1     | -3.968±0.343 | -4.192±0.366 | 5.09E-03 |
| cg16821394 | 5 | 141488611 | GeneBody/1st intron       | NDFIP1     | -5.325±0.501 | -5.779±0.548 | 1.56E-04 |
| cg20044189 | 5 | 141704548 | GeneBody/5'UTR/1st exon   | SPRY4      | -6.294±0.554 | -6.749±0.548 | 4.27E-04 |
| cg03328750 | 5 | 142150401 | GeneBody/1st exon         | ARHGAP26   | -3.97±0.247  | -4.149±0.359 | 4.54E-03 |
| cg08367838 | 5 | 143549786 | GeneBody/5'UTR/1st intron | YIPF5      | -3.819±0.523 | -4.269±0.588 | 3.32E-04 |
| cg09189322 | 5 | 145827172 | GeneBody/1st intron       | TCERG1     | -5.058±0.299 | -5.311±0.33  | 3.84E-04 |
| cg02376163 | 5 | 147763224 | TSS1500                   | FBXO38     | -4.07±0.339  | -4.279±0.33  | 6.87E-03 |
| cg25847835 | 5 | 147763803 | GeneBody/5'UTR/1st intron | FBXO38     | -4.122±0.205 | -4.306±0.226 | 1.77E-04 |
| cg10328462 | 5 | 148724862 | TSS200                    | GRPEL2     | -5.293±0.4   | -5.798±0.603 | 2.85E-06 |
| cg08680102 | 5 | 148725324 | GeneBody/1st intron       | GRPEL2     | -5.248±0.325 | -5.486±0.511 | 5.24E-03 |
| cg05607472 | 5 | 148930374 | TSS1500                   | CSNK1A1    | -5.872±0.659 | -6.304±0.728 | 5.24E-03 |
| cg13237906 | 5 | 149340052 | TSS1500                   | SLC26A2    | -5.704±0.478 | -6.283±0.556 | 1.93E-06 |
| cg05382565 | 5 | 149380781 | TSS200                    | TIGD6      | -5.131±0.407 | -5.394±0.467 | 6.39E-03 |
| cg08983975 | 5 | 149737654 | GeneBody/1st intron       | TCOF1      | -4.918±0.368 | -5.169±0.246 | 1.91E-03 |
| cg19928046 | 5 | 149792249 | GeneBody/1st exon         | CD74       | -4.994±0.783 | -5.461±0.635 | 7.14E-03 |
| cg07155664 | 5 | 149829590 | TSS1500                   | RPS14      | -5.147±0.56  | -5.522±0.546 | 3.48E-03 |
| cg15467759 | 5 | 149900327 | GeneBody/5'UTR/1st intron | NDST1      | 3.831±0.284  | 4.02±0.312   | 4.49E-03 |
| cg12346881 | 5 | 150283885 | GeneBody/5'UTR/1st intron | ZNF300     | 1.904±0.439  | 1.502±0.731  | 7.03E-04 |
| cg12483860 | 5 | 150460615 | GeneBody/5'UTR/1st exon   | TNIP1      | -4.435±0.25  | -4.642±0.343 | 9.70E-04 |
| cg03197524 | 5 | 150460989 | TSS1500                   | TNIP1      | -4.321±0.379 | -4.661±0.56  | 5.13E-04 |
| cg14104257 | 5 | 150827447 | GeneBody/5'UTR/1st intron | SLC36A1    | -4.971±0.355 | -5.336±0.545 | 1.01E-04 |
| cg21101222 | 5 | 151138161 | GeneBody/5'UTR/1st exon   | ATOX1      | -6.213±0.553 | -6.749±0.666 | 8.31E-05 |
| cg26361928 | 5 | 151151522 | GeneBody/5'UTR/1st exon   | G3BP1      | -5.237±0.655 | -5.792±0.767 | 4.49E-04 |
| cg22230395 | 5 | 153418202 | GeneBody/5'UTR/1st intron | FAM114A2   | -4.76±0.373  | -5.171±0.532 | 2.38E-05 |
| cg17034082 | 5 | 153418793 | GeneBody/5'UTR/1st intron | MFAP3      | -4.547±0.374 | -4.917±0.487 | 8.08E-05 |
| cg02141675 | 5 | 153569408 | TSS1500                   | GALNT10    | -4.263±0.587 | -4.624±0.505 | 6.04E-03 |
| cg26565838 | 5 | 153570764 | GeneBody/1st intron       | GALNT10    | -3.819±0.462 | -4.141±0.508 | 3.07E-03 |
| cg09545860 | 5 | 153825063 | GeneBody/1st intron       | SAP30L-AS1 | -4.431±0.372 | -4.72±0.428  | 1.16E-03 |
| cg07927484 | 5 | 153826296 | GeneBody/1st exon         | SAP30L     | -4.662±0.281 | -5.001±0.461 | 1.16E-05 |
| cg08519865 | 5 | 156569391 | GeneBody/5'UTR/1st intron | MED7       | -4.472±0.456 | -4.727±0.246 | 8.63E-03 |
| cg09453312 | 5 | 156608118 | GeneBody/1st exon         | ITK        | 0.434±0.599  | -0.007±0.827 | 3.42E-03 |
| cg01657408 | 5 | 158634989 | GeneBody/5'UTR/1st exon   | RNF145     | -4.141±0.329 | -4.473±0.367 | 3.53E-05 |
| cg09038885 | 5 | 159343148 | TSS1500                   | ADRA1B     | -3.464±0.887 | -4.01±0.581  | 4.58E-03 |
| cg01222684 | 5 | 159435961 | TSS1500                   | TTC1       | -2.21±0.407  | -1.93±0.512  | 4.75E-03 |
| cg19545851 | 5 | 162887280 | TSS200                    | NUDCD2     | -5.068±0.305 | -5.463±0.455 | 1.77E-06 |
| cg16802646 | 5 | 167718483 | TSS1500                   | WWC1       | -4.568±0.534 | -5.073±0.65  | 1.20E-04 |
| cg02865818 | 5 | 167719214 | GeneBody/1st exon         | WWC1       | -4.693±0.407 | -4.971±0.561 | 6.36E-03 |
| cg24809768 | 5 | 167914047 | GeneBody/1st intron       | RARS       | -4.667±0.378 | -5.11±0.519  | 6.79E-06 |
| cg11119131 | 5 | 169010837 | GeneBody/5'UTR/1st exon   | SPDL1      | -4.647±0.509 | -5.021±0.69  | 3.14E-03 |
| cg23434919 | 5 | 171615056 | GeneBody/5'UTR/1st exon   | STK10      | -5.245±0.598 | -5.698±0.654 | 1.32E-03 |
| cg00912191 | 5 | 171709917 | GeneBody/1st intron       | UBTD2      | -2.627±0.545 | -3.076±0.766 | 1.33E-03 |
| cg17429424 | 5 | 172197911 | GeneBody/1st exon         | DUSP1      | -5.622±0.523 | -5.937±0.452 | 7.14E-03 |
| cg22229034 | 5 | 172198031 | GeneBody/5'UTR/1st exon   | DUSP1      | -5.597±0.469 | -5.981±0.677 | 1.33E-03 |
| cg17946497 | 5 | 172198141 | GeneBody/5'UTR/1st exon   | DUSP1      | -5.476±0.577 | -5.959±0.642 | 4.52E-04 |
| cg04060275 | 5 | 172198791 | TSS1500                   | DUSP1      | -5.239±0.527 | -5.571±0.527 | 6.17E-03 |
| cg16957313 | 5 | 172199661 | TSS1500                   | DUSP1      | -4.246±0.683 | -4.676±0.508 | 4.19E-03 |
| cg15947959 | 5 | 172261155 | TSS200                    | ERGIC1     | -3.26±0.297  | -3.471±0.35  | 2.98E-03 |
| cg17304433 | 5 | 172261515 | GeneBody/1st intron       | ERGIC1     | -4.871±0.362 | -5.2±0.507   | 3.50E-04 |
| cg14134153 | 5 | 172386668 | GeneBody/5'UTR/1st intron | RPL26L1    | -2.955±0.56  | -2.584±0.632 | 5.03E-03 |
| cg20225275 | 5 | 172410975 | GeneBody/1st intron       | ATP6V0E1   | -4.34±0.386  | -4.682±0.565 | 5.74E-04 |
| cg04960652 | 5 | 172571539 | GeneBody/5'UTR/1st exon   | BNIP1      | -4.961±0.642 | -5.543±0.741 | 1.85E-04 |
| cg12598575 | 5 | 173043653 | GeneBody/5'UTR/1st exon   | BOD1       | -5.466±0.359 | -5.806±0.552 | 3.15E-04 |
| cg14345676 | 5 | 175109098 | GeneBody/5'UTR/1st exon   | HRH2       | 1.171±0.476  | 0.777±0.848  | 2.94E-03 |
| cg16233911 | 5 | 175395445 | TSS200                    | THOC3      | -4.722±0.428 | -5.021±0.489 | 3.29E-03 |
| cg27164762 | 5 | 175815688 | GeneBody/5'UTR/1st exon   | NOP16      | -5.295±0.427 | -5.687±0.6   | 3.23E-04 |
| cg07510052 | 5 | 175815825 | GeneBody/1st exon         | HIGD2A     | -2.608±0.344 | -2.896±0.385 | 4.55E-04 |
| cg10082991 | 5 | 175964280 | GeneBody/5'UTR/1st exon   | RNF44      | -4.138±0.362 | -3.866±0.325 | 9.74E-04 |
| cg08283293 | 5 | 175964814 | TSS1500                   | RNF44      | -5.027±0.288 | -5.228±0.28  | 2.38E-03 |
| cg06720424 | 5 | 176433271 | GeneBody/5'UTR/1st intron | UIMC1      | -5.899±0.545 | -6.359±0.517 | 2.78E-04 |
| cg24504986 | 5 | 176449842 | GeneBody/1st exon         | ZNF346     | -4.603±0.496 | -5.068±0.743 | 3.18E-04 |
| cg11316784 | 5 | 176560594 | TSS1500                   | NSD1       | -5.584±0.497 | -6.087±0.756 | 1.19E-04 |
| cg18824775 | 5 | 176731107 | GeneBody/1st intron       | PRELID1    | -5.863±0.476 | -6.238±0.464 | 6.80E-04 |
| cg02693857 | 5 | 176738937 | GeneBody/5'UTR/1st exon   | MXD3       | -4.473±0.342 | -4.689±0.346 | 6.12E-03 |
| cg21751787 | 5 | 176778504 | GeneBody/1st exon         | LMAN2      | -5.134±0.387 | -5.465±0.479 | 4.71E-04 |
| cg01805784 | 5 | 176873808 | GeneBody/5'UTR/1st exon   | PRR7       | -5.307±0.581 | -5.786±0.621 | 4.89E-04 |
| cg09572106 | 5 | 176924899 | TSS1500                   | PDLIM7     | -5.707±0.505 | -6.157±0.602 | 2.54E-04 |
| cg10948883 | 5 | 176944132 | TSS200                    | DDX41      | -5.886±0.583 | -6.48±0.645  | 3.04E-05 |
| cg15437432 | 5 | 177018986 | TSS1500                   | TMED9      | -4.094±0.408 | -4.431±0.581 | 1.15E-03 |
| cg17587934 | 5 | 177631246 | TSS1500                   | HNRNPAB    | -5.379±0.404 | -5.752±0.479 | 1.61E-04 |
| cg10038259 | 5 | 177631514 | GeneBody/5'UTR/1st exon   | HNRNPAB    | -5.587±0.593 | -6.056±0.667 | 8.71E-04 |
| cg07051140 | 5 | 177659229 | GeneBody/1st intron       | PHYKPL     | -4.632±0.374 | -4.897±0.578 | 6.72E-03 |
| cg10224037 | 5 | 178157518 | GeneBody/5'UTR/1st intron | ZNF354A    | -5.355±0.539 | -5.811±0.592 | 3.85E-04 |
| cg21678388 | 5 | 178286735 | TSS1500                   | ZNF354B    | -3.967±0.578 | -4.376±0.696 | 3.28E-03 |
| cg19723775 | 5 | 179050963 | TSS1500                   | HNRNPH1    | -5.606±0.479 | -6.335±0.822 | 1.69E-07 |
| cg14446808 | 5 | 179233589 | GeneBody/5'UTR/1st exon   | SQSTM1     | -3.245±0.209 | -3.41±0.256  | 1.10E-03 |
| cg24341536 | 5 | 179247663 | TSS200                    | SQSTM1     | -3.838±0.284 | -4.057±0.405 | 2.32E-03 |
| cg21929993 | 5 | 179498114 | GeneBody/1st intron       | RNF130     | -4.066±0.4   | -4.445±0.516 | 1.50E-04 |
| cg20193716 | 5 | 180229067 | GeneBody/5'UTR/1st intron | MGAT1      | -3.992±0.47  | -4.311±0.516 | 3.94E-03 |
| cg27285278 | 5 | 180650776 | GeneBody/5'UTR/1st exon   | TRIM41     | -4.917±0.611 | -5.489±0.652 | 9.43E-05 |
| cg11100802 | 5 | 180688063 | GeneBody/5'UTR/1st exon   | TRIM52     | -5.143±0.347 | -5.573±0.567 | 6.98E-06 |

|            |   |          |                           |              |              |              |          |
|------------|---|----------|---------------------------|--------------|--------------|--------------|----------|
| cg16550324 | 6 | 2245327  | GeneBody/1st intron       | GMDS         | -5.211±0.572 | -5.73±0.704  | 2.21E-04 |
| cg08932320 | 6 | 2246077  | GeneBody/1st exon         | LOC100508120 | -5.174±0.261 | -5.414±0.468 | 9.89E-04 |
| cg05191792 | 6 | 2765113  | TSS1500                   | WRNIP1       | -5.383±0.494 | -5.84±0.629  | 1.97E-04 |
| cg27056119 | 6 | 2842239  | GeneBody/5'UTR/1st exon   | SERPINB1     | -4.699±0.366 | -5.072±0.596 | 1.57E-04 |
| cg12044889 | 6 | 3000430  | GeneBody/5'UTR/1st intron | NQO2         | -4.786±0.308 | -5.096±0.638 | 7.98E-04 |
| cg00231644 | 6 | 3158512  | TSS1500                   | TUBB2A       | -1.362±0.704 | -0.915±0.64  | 5.03E-03 |
| cg03202897 | 6 | 3849688  | GeneBody/5'UTR/1st exon   | FAM50B       | 0.379±0.123  | 0.48±0.218   | 2.85E-03 |
| cg06786424 | 6 | 4021316  | TSS1500                   | PRPF4B       | -4.831±0.486 | -5.183±0.438 | 1.42E-03 |
| cg16208491 | 6 | 4021748  | GeneBody/1st intron       | PRPF4B       | -2.338±0.154 | -2.439±0.208 | 8.27E-03 |
| cg09439093 | 6 | 4135575  | GeneBody/5'UTR/1st intron | ECI2         | -4.989±0.403 | -5.33±0.469  | 4.49E-04 |
| cg09054876 | 6 | 4136564  | GeneBody/1st intron       | LOC100507506 | -3.443±0.565 | -3.81±0.538  | 4.43E-03 |
| cg15669273 | 6 | 5261406  | TSS200                    | FARS2        | -4.697±0.307 | -5.074±0.493 | 7.30E-06 |
| cg26165608 | 6 | 5261829  | GeneBody/5'UTR/1st exon   | FARS2        | -5.5±0.481   | -5.802±0.494 | 6.69E-03 |
| cg14047667 | 6 | 6320889  | GeneBody/5'UTR/1st exon   | F13A1        | -4.642±0.855 | -5.217±0.85  | 3.49E-03 |
| cg18533466 | 6 | 7107952  | GeneBody/5'UTR/1st exon   | RREB1        | -5.538±0.322 | -5.909±0.501 | 1.85E-05 |
| cg07936037 | 6 | 7313172  | GeneBody/1st intron       | SSR1         | -5.136±0.412 | -5.564±0.663 | 1.13E-04 |
| cg26848248 | 6 | 7313728  | TSS200                    | SSR1         | -3.918±0.468 | -4.249±0.635 | 4.62E-03 |
| cg24520800 | 6 | 7389821  | GeneBody/5'UTR/1st exon   | CAGE1        | -5.548±0.594 | -5.997±0.587 | 1.08E-03 |
| cg13654195 | 6 | 7390091  | GeneBody/5'UTR/1st exon   | RIOK1        | -4.996±0.334 | -5.286±0.497 | 7.84E-04 |
| cg21068339 | 6 | 7542819  | GeneBody/1st intron       | DSP          | -5.111±0.44  | -5.46±0.791  | 4.42E-03 |
| cg00012792 | 6 | 8064493  | GeneBody/1st intron       | BLOC1S5      | -4.369±0.257 | -4.621±0.344 | 1.05E-04 |
| cg06544198 | 6 | 10723702 | GeneBody/5'UTR/1st intron | TMEM14C      | -4.132±0.343 | -4.53±0.484  | 9.05E-06 |
| cg21486659 | 6 | 10747693 | TSS1500                   | TMEM14B      | -4.037±0.281 | -4.223±0.333 | 5.75E-03 |
| cg18226566 | 6 | 11232665 | GeneBody/1st intron       | NEDD9        | -3.378±0.308 | -3.196±0.308 | 9.77E-03 |
| cg01177524 | 6 | 11232933 | TSS200                    | NEDD9        | -4.928±0.341 | -5.137±0.278 | 5.98E-03 |
| cg26685339 | 6 | 12013214 | GeneBody/5'UTR/1st intron | HIVEP1       | -4.919±0.512 | -5.309±0.448 | 8.12E-04 |
| cg25559625 | 6 | 12290322 | TSS1500                   | EDN1         | -4.657±0.694 | -5.048±0.439 | 8.99E-03 |
| cg20376899 | 6 | 12290779 | GeneBody/5'UTR/1st exon   | EDN1         | -4.561±0.633 | -4.96±0.511  | 4.57E-03 |
| cg08946989 | 6 | 13328449 | GeneBody/5'UTR/1st intron | TBC1D7       | -5.969±0.641 | -6.562±0.662 | 1.02E-04 |
| cg16253168 | 6 | 13614902 | TSS1500                   | NOL7         | -4.897±0.38  | -5.342±0.607 | 1.64E-05 |
| cg06433995 | 6 | 13615570 | GeneBody/5'UTR/1st exon   | NOL7         | -5.182±0.31  | -5.442±0.391 | 6.53E-04 |
| cg23528708 | 6 | 13814945 | TSS200                    | MCUR1        | -3.974±0.257 | -4.297±0.339 | 1.56E-06 |
| cg01288598 | 6 | 14118227 | GeneBody                  | CD83         | -3.629±0.448 | -4.035±0.355 | 8.20E-05 |
| cg14298379 | 6 | 16128926 | TSS1500                   | MYLIP        | -4.413±0.268 | -4.727±0.374 | 7.19E-06 |
| cg19055458 | 6 | 16128933 | TSS1500                   | MYLIP        | -4.677±0.525 | -5.059±0.577 | 2.07E-03 |
| cg10487127 | 6 | 16761668 | GeneBody/5'UTR/1st exon   | ATXN1        | -5.142±0.367 | -5.535±0.507 | 3.11E-05 |
| cg14499797 | 6 | 21594038 | GeneBody/5'UTR/1st exon   | SOX4         | -3.084±0.172 | -3.258±0.292 | 2.22E-04 |
| cg13884546 | 6 | 24403062 | TSS200                    | MRS2         | -4.703±0.433 | -5.149±0.575 | 4.85E-05 |
| cg06171242 | 6 | 24667490 | GeneBody/5'UTR/1st exon   | ACOT13       | -4.289±0.331 | -4.563±0.351 | 4.55E-04 |
| cg11780382 | 6 | 24719812 | TSS1500                   | C6orf62      | -4.196±0.538 | -4.645±0.638 | 5.55E-04 |
| cg26331192 | 6 | 24775229 | GeneBody/5'UTR/1st exon   | GMNN         | -5.529±0.582 | -5.974±0.658 | 1.30E-03 |
| cg03969906 | 6 | 26021768 | TSS200                    | HIST1H4A     | -2.481±0.308 | -2.287±0.351 | 7.69E-03 |
| cg23099349 | 6 | 26032281 | GeneBody/1st exon         | HIST1H3B     | -4.392±0.376 | -4.672±0.461 | 2.12E-03 |
| cg15797414 | 6 | 26032407 | TSS200                    | HIST1H3B     | -4.159±0.618 | -4.701±0.622 | 2.02E-04 |
| cg06892726 | 6 | 26087607 | GeneBody/5'UTR/1st exon   | HFE          | -2.829±0.551 | -3.317±0.492 | 1.39E-04 |
| cg24453353 | 6 | 26104185 | GeneBody/1st exon         | HIST1H4C     | -5.001±0.404 | -5.293±0.406 | 1.78E-03 |
| cg15519208 | 6 | 26155791 | TSS1500                   | HIST1H1E     | -3.246±0.447 | -3.534±0.523 | 6.86E-03 |
| cg03007571 | 6 | 26157673 | TSS1500                   | HIST1H2BD    | -3.793±0.418 | -4.176±0.49  | 1.62E-04 |
| cg25881193 | 6 | 26383297 | TSS200                    | BTN2A2       | -3.045±0.217 | -3.209±0.232 | 1.30E-03 |
| cg16494590 | 6 | 26421791 | GeneBody/1st exon         | BTN2A3P      | -3.751±0.491 | -4.086±0.354 | 2.00E-03 |
| cg12455562 | 6 | 26422779 | GeneBody                  | BTN2A3P      | 1.524±0.299  | 1.296±0.251  | 7.54E-04 |
| cg27464755 | 6 | 26537980 | TSS1500                   | HMGN4        | -3.524±0.408 | -3.819±0.593 | 4.58E-03 |
| cg05142576 | 6 | 27114781 | TSS200                    | HIST1H2AH    | -3.908±0.493 | -4.263±0.553 | 2.32E-03 |
| cg07129274 | 6 | 27832880 | TSS1500                   | HIST1H2AL    | -4.521±0.529 | -4.911±0.706 | 2.94E-03 |
| cg13665593 | 6 | 28092420 | GeneBody/5'UTR/1st exon   | ZSCAN16      | -5.872±0.504 | -6.209±0.733 | 8.76E-03 |
| cg24986572 | 6 | 28193283 | GeneBody/5'UTR/1st intron | ZSCAN9       | -4.931±0.923 | -5.493±0.472 | 4.33E-03 |
| cg26875522 | 6 | 28219796 | GeneBody/5'UTR/1st exon   | ZKSCAN4      | -4.872±0.448 | -5.204±0.355 | 9.40E-04 |
| cg12561748 | 6 | 28220091 | TSS200                    | ZKSCAN4      | -5.441±0.662 | -6.035±0.602 | 1.19E-04 |
| cg05661333 | 6 | 29600200 | GeneBody/5'UTR/1st intron | GABBR1       | -4.561±0.461 | -4.985±0.455 | 1.00E-04 |
| cg24847163 | 6 | 29600980 | TSS200                    | GABBR1       | -5.937±0.637 | -6.391±0.707 | 2.58E-03 |
| cg14402472 | 6 | 29691165 | GeneBody/5'UTR/1st exon   | HLA-F        | -5.119±0.785 | -5.755±0.669 | 3.85E-04 |
| cg01716083 | 6 | 30029143 | GeneBody/5'UTR/1st exon   | ZNRD1        | -4.734±0.428 | -5.105±0.636 | 7.88E-04 |
| cg04802801 | 6 | 30034711 | TSS1500                   | PPP1R11      | -4.396±0.245 | -4.564±0.23  | 2.69E-03 |
| cg11724134 | 6 | 30043727 | TSS200                    | RNF39        | -4.38±0.581  | -4.822±0.549 | 9.37E-04 |
| cg14694232 | 6 | 30181448 | TSS200                    | TRIM26       | -4.705±0.438 | -5.123±0.515 | 9.60E-05 |
| cg23654545 | 6 | 30525120 | GeneBody/5'UTR/1st exon   | GNL1         | -4.598±0.376 | -4.893±0.684 | 5.20E-03 |
| cg26884376 | 6 | 30539453 | GeneBody/1st intron       | ABCF1        | -5.027±0.671 | -5.698±0.77  | 4.52E-05 |
| cg23938476 | 6 | 30615339 | GeneBody/1st exon         | C6orf136     | -5.369±0.384 | -5.637±0.494 | 4.31E-03 |
| cg24450157 | 6 | 30640543 | GeneBody/1st intron       | DHX16        | -4.534±0.37  | -4.825±0.655 | 4.41E-03 |
| cg26259575 | 6 | 30687946 | TSS1500                   | TUBB         | -5.046±0.35  | -5.466±0.497 | 5.38E-06 |
| cg01944444 | 6 | 30688681 | GeneBody/1st intron       | TUBB         | -4.511±0.412 | -4.764±0.427 | 8.06E-03 |
| cg24000189 | 6 | 30710425 | GeneBody/5'UTR/1st exon   | FLOT1        | -5.292±0.555 | -5.659±0.572 | 4.29E-03 |
| cg11977634 | 6 | 30852699 | TSS200                    | DDR1         | -4.264±0.238 | -4.566±0.389 | 4.60E-06 |
| cg00585846 | 6 | 31515458 | GeneBody/5'UTR/1st exon   | NFKBIL1      | -4.144±0.215 | -4.436±0.325 | 7.50E-07 |
| cg27091233 | 6 | 31620917 | TSS1500                   | BAG6         | -5.237±0.349 | -5.625±0.454 | 1.37E-05 |
| cg09867157 | 6 | 31620935 | TSS1500                   | BAG6         | -4.979±0.39  | -5.373±0.495 | 5.50E-05 |
| cg05728656 | 6 | 31628427 | GeneBody/5'UTR/1st exon   | C6orf47      | -5.203±0.397 | -5.447±0.36  | 6.58E-03 |
| cg00746130 | 6 | 31671271 | TSS200                    | ABHD16A      | -4.188±0.764 | -4.761±0.724 | 1.09E-03 |
| cg02257681 | 6 | 31698002 | GeneBody/5'UTR/1st exon   | DDAH2        | -4.316±0.722 | -4.929±1.138 | 1.29E-03 |
| cg10435003 | 6 | 31707602 | TSS200                    | MSH5         | -4.884±0.396 | -5.202±0.547 | 1.40E-03 |
| cg00071998 | 6 | 31708121 | GeneBody/5'UTR/1st intron | MSH5         | -4.012±0.235 | -4.185±0.354 | 4.53E-03 |
| cg00728602 | 6 | 31744927 | GeneBody/5'UTR/1st exon   | VWA7         | -4.844±0.401 | -5.159±0.477 | 1.12E-03 |
| cg01505176 | 6 | 31763310 | GeneBody/5'UTR/1st intron | VARS         | -5.772±0.594 | -6.339±0.758 | 1.28E-04 |
| cg13653456 | 6 | 31763819 | TSS200                    | VARS         | -3.757±0.317 | -4.111±0.647 | 1.92E-04 |
| cg27573806 | 6 | 31774911 | TSS200                    | LSM2         | -4.344±0.397 | -4.837±0.542 | 2.30E-06 |
| cg05920090 | 6 | 31782873 | TSS200                    | HSPA1L       | -4.169±0.383 | -4.477±0.667 | 3.42E-03 |
| cg14663792 | 6 | 31802922 | TSS200                    | SNORD48      | -4.345±0.319 | -4.684±0.488 | 5.93E-05 |
| cg10265786 | 6 | 31940028 | GeneBody/5'UTR/1st exon   | DOM3Z        | -5.201±0.294 | -5.493±0.429 | 1.27E-04 |
| cg21415604 | 6 | 31948433 | TSS1500                   | C4B_2        | 3.948±0.375  | 3.711±0.414  | 7.13E-03 |
| cg03479797 | 6 | 32096154 | TSS200                    | ATF6B        | -4.353±0.478 | -4.655±0.4   | 4.70E-03 |
| cg05069385 | 6 | 32098247 | TSS200                    | FKBP1        | -5.086±0.449 | -5.376±0.568 | 7.94E-03 |
| cg26626042 | 6 | 32151594 | GeneBody                  | AGER         | 2.121±0.27   | 2.314±0.326  | 2.93E-03 |
| cg08592230 | 6 | 32163562 | TSS1500                   | GPSM3        | -5.043±0.396 | -5.283±0.361 | 7.10E-03 |
| cg19221044 | 6 | 32806167 | GeneBody/5'UTR/1st intron | TAP2         | -4.135±0.31  | -4.373±0.326 | 1.02E-03 |
| cg10714284 | 6 | 32908901 | TSS200                    | HLA-DMB      | -4.15±0.401  | -4.449±0.494 | 2.10E-03 |

|            |   |          |                           |           |              |              |          |
|------------|---|----------|---------------------------|-----------|--------------|--------------|----------|
| cg10211788 | 6 | 32936073 | TSS1500                   | BRD2      | -5.699±0.546 | -6.234±0.654 | 6.96E-05 |
| cg01909833 | 6 | 32937267 | GeneBody/5'UTR/1st intron | BRD2      | -4.323±0.548 | -4.706±0.531 | 2.34E-03 |
| cg23070585 | 6 | 33168452 | GeneBody/5'UTR/1st exon   | RXR       | -6.304±0.506 | -6.665±0.603 | 2.98E-03 |
| cg27331144 | 6 | 33175688 | GeneBody/1st exon         | MIR219-1  | -5.431±0.371 | -5.839±0.658 | 8.94E-05 |
| cg18189601 | 6 | 33176225 | TSS200                    | RING1     | -2.901±0.376 | -3.351±0.669 | 2.34E-05 |
| cg14363494 | 6 | 33176234 | TSS200                    | RING1     | -4.119±0.375 | -4.423±0.592 | 2.12E-03 |
| cg03939485 | 6 | 33266076 | GeneBody                  | RGL2      | -4.035±0.344 | -3.82±0.362  | 7.18E-03 |
| cg02990567 | 6 | 33266961 | GeneBody/5'UTR/1st exon   | RGL2      | -4.859±0.488 | -5.215±0.616 | 2.79E-03 |
| cg26315802 | 6 | 33281972 | GeneBody/5'UTR/1st exon   | TAPBP     | -3.007±0.145 | -3.135±0.231 | 6.84E-04 |
| cg06975739 | 6 | 33282158 | GeneBody/5'UTR/1st exon   | TAPBP     | -2.431±0.632 | -2.848±0.702 | 5.48E-03 |
| cg13303256 | 6 | 33378019 | TSS1500                   | PHF1      | -5.082±0.347 | -5.318±0.366 | 3.62E-03 |
| cg06818415 | 6 | 33379267 | GeneBody/1st intron       | PHF1      | -4.31±0.549  | -4.851±0.561 | 3.99E-05 |
| cg26974738 | 6 | 33386261 | TSS200                    | CUTA      | -4.382±0.224 | -4.52±0.224  | 6.97E-03 |
| cg16400825 | 6 | 33589418 | GeneBody/1st exon         | ITPR3     | -4.593±0.301 | -4.918±0.391 | 2.06E-05 |
| cg11406695 | 6 | 33679379 | GeneBody/1st exon         | MNF1      | -4.943±0.537 | -5.339±0.641 | 2.15E-03 |
| cg25922239 | 6 | 33757077 | TSS200                    | LEMD2     | -5.429±0.63  | -5.914±0.693 | 1.14E-03 |
| cg06247172 | 6 | 34216481 | GeneBody/5'UTR/1st intron | C6orf1    | -4.991±0.311 | -5.264±0.54  | 1.36E-03 |
| cg11061603 | 6 | 34393330 | GeneBody/5'UTR/1st intron | RPS10     | -4.914±0.295 | -5.152±0.532 | 3.89E-03 |
| cg17043922 | 6 | 34664305 | GeneBody/1st exon         | C6orf106  | -2.208±0.308 | -2.552±0.419 | 1.49E-05 |
| cg15676488 | 6 | 34725116 | GeneBody/5'UTR/1st exon   | SNRPC     | -4.073±0.415 | -4.355±0.582 | 7.08E-03 |
| cg04506628 | 6 | 34725359 | GeneBody/1st intron       | SNRPC     | -4.111±0.434 | -4.518±0.681 | 3.90E-04 |
| cg14142521 | 6 | 34855408 | GeneBody/1st intron       | TAF11     | -4.112±0.421 | -4.418±0.578 | 3.67E-03 |
| cg17413703 | 6 | 34855470 | GeneBody/1st intron       | TAF11     | -4.018±0.336 | -4.287±0.479 | 1.62E-03 |
| cg13510363 | 6 | 34857281 | GeneBody/1st exon         | ANKS1A    | -4.546±0.325 | -4.862±0.434 | 1.16E-04 |
| cg00635481 | 6 | 35226917 | TSS1500                   | ZNF76     | -5.664±0.609 | -6.145±0.627 | 7.22E-04 |
| cg00862770 | 6 | 35655764 | GeneBody/5'UTR/1st intron | FKBP5     | -4.9±0.628   | -5.463±0.736 | 2.26E-04 |
| cg01693108 | 6 | 35888298 | GeneBody                  | SRPK1     | -5.116±0.455 | -5.488±0.519 | 6.32E-04 |
| cg25324046 | 6 | 35889059 | TSS200                    | SRPK1     | -5.894±0.262 | -5.043±0.406 | 1.32E-06 |
| cg04286043 | 6 | 36410500 | TSS200                    | KCTD20    | -4.541±0.406 | -4.895±0.479 | 3.26E-04 |
| cg24170535 | 6 | 36410553 | GeneBody/5'UTR/1st exon   | KCTD20    | -4.299±0.336 | -4.548±0.469 | 3.19E-03 |
| cg08027745 | 6 | 36561726 | TSS1500                   | SRSF3     | -4.817±0.557 | -5.346±0.641 | 9.54E-05 |
| cg05759269 | 6 | 36646253 | TSS1500                   | CDKN1A    | -4.502±0.493 | -4.878±0.508 | 1.07E-03 |
| cg01306510 | 6 | 36646540 | GeneBody/5'UTR/1st exon   | CDKN1A    | -5.627±0.452 | -5.991±0.654 | 1.64E-03 |
| cg21222430 | 6 | 36647664 | GeneBody/5'UTR/1st intron | CDKN1A    | -4.275±0.315 | -4.602±0.462 | 6.61E-05 |
| cg08179530 | 6 | 36648295 | GeneBody/5'UTR/1st intron | CDKN1A    | -5.465±0.741 | -5.923±0.684 | 6.39E-03 |
| cg15591837 | 6 | 36842614 | GeneBody/5'UTR/1st exon   | PP1L1     | -5.252±0.364 | -5.562±0.504 | 7.22E-04 |
| cg26222229 | 6 | 36842844 | TSS200                    | PP1L1     | -4.495±0.265 | -4.649±0.238 | 9.83E-03 |
| cg00734993 | 6 | 36953694 | GeneBody/1st exon         | MTCH1     | -4.71±0.39   | -5.108±0.5   | 4.91E-05 |
| cg16239406 | 6 | 36954249 | GeneBody/5'UTR/1st exon   | MTCH1     | -5.682±0.463 | -6.059±0.458 | 4.78E-04 |
| cg21769943 | 6 | 37137738 | TSS200                    | PIM1      | -5.022±0.411 | -5.381±0.576 | 5.73E-04 |
| cg26824091 | 6 | 38670437 | GeneBody/1st intron       | GLO1      | -4.276±0.434 | -4.64±0.533  | 5.63E-04 |
| cg26287783 | 6 | 39083072 | TSS1500                   | SAYS1     | -4.439±0.285 | -4.741±0.407 | 4.15E-05 |
| cg22788223 | 6 | 41040659 | TSS200                    | NFYA      | -5.371±0.566 | -5.766±0.541 | 2.31E-03 |
| cg20095587 | 6 | 41130718 | GeneBody/1st intron       | TREM2     | 1.946±0.374  | 1.674±0.655  | 8.25E-03 |
| cg03442064 | 6 | 41515050 | GeneBody/5'UTR/1st intron | FOXP4     | -2.101±0.131 | -2.253±0.215 | 2.18E-05 |
| cg06378976 | 6 | 41703613 | TSS1500                   | TFEB      | -1.878±0.4   | -2.14±0.484  | 6.42E-03 |
| cg06381133 | 6 | 41747367 | GeneBody/5'UTR/1st intron | FRS3      | -4.304±0.275 | -4.673±0.399 | 7.52E-07 |
| cg20991095 | 6 | 41863098 | GeneBody/5'UTR/1st exon   | USP49     | -5.448±0.462 | -5.807±0.601 | 1.62E-03 |
| cg27563210 | 6 | 41863441 | TSS1500                   | USP49     | -4.587±0.627 | -5.125±0.723 | 3.66E-04 |
| cg09322949 | 6 | 41890043 | GeneBody/1st intron       | BYSL      | -2.902±0.442 | -3.198±0.471 | 4.10E-03 |
| cg07964539 | 6 | 41890080 | GeneBody/1st intron       | BYSL      | -2.942±0.459 | -3.26±0.616  | 5.83E-03 |
| cg25658178 | 6 | 41909862 | TSS1500                   | CCND3     | -4.624±0.426 | -4.956±0.508 | 1.24E-03 |
| cg07191600 | 6 | 42421243 | TSS1500                   | TRERF1    | -5.429±0.426 | -5.795±0.542 | 4.97E-04 |
| cg19448829 | 6 | 42531521 | TSS1500                   | UBR2      | -5.071±0.632 | -5.522±0.691 | 2.42E-03 |
| cg00893987 | 6 | 42847415 | TSS1500                   | RPL7L1    | -4.945±0.391 | -5.217±0.463 | 3.66E-03 |
| cg20681975 | 6 | 42897059 | GeneBody/5'UTR/1st exon   | CNPY3     | -4.75±0.353  | -5.13±0.455  | 2.15E-05 |
| cg13397365 | 6 | 42981894 | GeneBody/5'UTR/1st exon   | KLHDC3    | -5.055±0.431 | -5.395±0.629 | 2.01E-03 |
| cg05107152 | 6 | 43026774 | GeneBody/1st intron       | MRPL2     | -3.612±0.479 | -3.946±0.625 | 4.64E-03 |
| cg07099407 | 6 | 43027930 | TSS1500                   | KLC4      | -2.876±0.439 | -3.222±0.62  | 1.81E-03 |
| cg08747889 | 6 | 43043786 | TSS1500                   | PTK7      | -4.183±0.585 | -4.612±0.546 | 1.36E-03 |
| cg12940430 | 6 | 43138965 | GeneBody/5'UTR/1st exon   | SRF       | -4.393±0.402 | -4.787±0.473 | 6.53E-05 |
| cg19595170 | 6 | 43139150 | GeneBody/5'UTR/1st exon   | SRF       | -4.13±0.467  | -4.548±0.645 | 4.00E-04 |
| cg02760007 | 6 | 43139670 | GeneBody/1st exon         | SRF       | -3.664±0.417 | -4.011±0.632 | 1.36E-03 |
| cg18878034 | 6 | 43197151 | GeneBody/1st exon         | DNPH1     | -5.445±0.534 | -5.949±0.72  | 1.82E-04 |
| cg07805833 | 6 | 43483391 | GeneBody                  | YIPF3     | 2.852±0.292  | 3.067±0.367  | 2.45E-03 |
| cg19506903 | 6 | 43484373 | GeneBody/1st intron       | YIPF3     | -4.956±0.478 | -5.314±0.485 | 1.26E-03 |
| cg07857181 | 6 | 43543548 | GeneBody/1st exon         | XPO5      | -4.613±0.491 | -4.907±0.476 | 8.83E-03 |
| cg14465910 | 6 | 43596764 | GeneBody/1st exon         | GTPBP2    | -4.522±0.373 | -4.843±0.394 | 2.87E-04 |
| cg23377693 | 6 | 43597122 | TSS200                    | MAD2L1BP  | -4.26±0.244  | -4.538±0.38  | 2.21E-05 |
| cg25824330 | 6 | 43655393 | GeneBody/1st intron       | MRPS18A   | -5.95±0.5    | -5.995±0.474 | 5.38E-04 |
| cg13184442 | 6 | 44355163 | TSS200                    | CDC5L     | -3.97±0.535  | -4.363±0.678 | 2.71E-03 |
| cg11806749 | 6 | 45345490 | GeneBody/5'UTR/1st intron | SUPT3H    | -4.077±0.202 | -4.302±0.444 | 3.38E-04 |
| cg04006554 | 6 | 46138530 | GeneBody/5'UTR/1st intron | ENPP5     | -5.188±1.083 | -5.786±0.617 | 9.81E-03 |
| cg19799744 | 6 | 46138963 | TSS1500                   | ENPP5     | -4.159±0.392 | -4.524±0.527 | 2.20E-04 |
| cg11574612 | 6 | 46620502 | GeneBody/5'UTR/1st exon   | CYP39A1   | -4.148±0.227 | -4.34±0.217  | 2.86E-04 |
| cg19557537 | 6 | 46620673 | GeneBody/5'UTR/1st exon   | SLC25A27  | -4.73±0.469  | -5.156±0.408 | 9.51E-05 |
| cg10568944 | 6 | 49430788 | GeneBody/5'UTR/1st intron | MUT       | -3.706±0.366 | -3.961±0.318 | 2.08E-03 |
| cg25786862 | 6 | 49431288 | GeneBody/5'UTR/1st intron | CENPQ     | -4.049±0.325 | -4.459±0.488 | 2.99E-06 |
| cg14961550 | 6 | 52149751 | TSS200                    | MCM3      | -3.581±0.202 | -3.726±0.264 | 3.51E-03 |
| cg17648620 | 6 | 52284686 | TSS1500                   | EFHC1     | -3.717±0.311 | -4.054±0.452 | 3.34E-05 |
| cg22248011 | 6 | 52442381 | GeneBody/1st exon         | TRAM2-AS1 | -5.091±0.321 | -5.536±0.44  | 2.86E-07 |
| cg05402265 | 6 | 52926119 | GeneBody/5'UTR/1st intron | ICK       | -3.82±0.3    | -4.104±0.386 | 1.46E-04 |
| cg21908116 | 6 | 53659077 | TSS1500                   | LRR1      | -5.69±0.393  | -6.011±0.382 | 4.51E-04 |
| cg21829265 | 6 | 56911139 | TSS1500                   | KIAA1586  | -4.219±0.429 | -4.514±0.606 | 6.46E-03 |
| cg16475089 | 6 | 56911617 | GeneBody/1st intron       | KIAA1586  | -6.14±0.56   | -6.559±0.63  | 1.62E-03 |
| cg24373308 | 6 | 57036955 | TSS200                    | BAG2      | -5.051±0.464 | -5.647±0.788 | 4.85E-06 |
| cg22984616 | 6 | 57037535 | GeneBody/1st exon         | BAG2      | -5.426±0.615 | -5.953±0.647 | 2.93E-04 |
| cg10497569 | 6 | 57087038 | GeneBody/5'UTR/1st exon   | RAB23     | -5.005±0.326 | -5.203±0.273 | 6.47E-03 |
| cg26430450 | 6 | 57087242 | TSS200                    | RAB23     | -4.744±0.329 | -5.013±0.409 | 8.03E-04 |
| cg27293353 | 6 | 57182516 | GeneBody/5'UTR/1st intron | PRIM2     | -5.497±0.521 | -5.921±0.639 | 8.19E-04 |
| cg24500683 | 6 | 64281771 | TSS200                    | PTP4A1    | -3.276±0.307 | -3.549±0.373 | 2.74E-04 |
| cg21872129 | 6 | 64281996 | GeneBody/5'UTR/1st exon   | PTP4A1    | -4.561±0.401 | -4.923±0.577 | 4.24E-04 |
| cg18887228 | 6 | 64356606 | GeneBody/1st exon         | PHF3      | 2.673±0.267  | 2.854±0.314  | 4.88E-03 |
| cg09747829 | 6 | 69348055 | GeneBody/5'UTR            | BAI3      | -3.314±0.629 | -3.902±0.653 | 9.17E-05 |
| cg10796979 | 6 | 70506998 | GeneBody/5'UTR/1st exon   | LMBRD1    | -5.177±0.327 | -5.597±0.454 | 1.43E-06 |

|            |   |           |                           |              |              |              |          |
|------------|---|-----------|---------------------------|--------------|--------------|--------------|----------|
| cg22716127 | 6 | 71377855  | GeneBody/1st intron       | SMAP1        | -5.47±0.465  | -5.84±0.555  | 9.84E-04 |
| cg26201579 | 6 | 74171602  | GeneBody/1st exon         | MTO1         | -4.899±0.368 | -5.365±0.573 | 3.39E-06 |
| cg01454004 | 6 | 74363018  | GeneBody/1st intron       | SLC17A5      | -4.14±0.598  | -4.544±0.586 | 3.28E-03 |
| cg00648153 | 6 | 74364149  | TSS1500                   | SLC17A5      | -4.169±0.463 | -4.459±0.546 | 8.86E-03 |
| cg15846718 | 6 | 75953307  | GeneBody/1st intron       | COX7A2       | -4.14±0.514  | -4.505±0.655 | 3.69E-03 |
| cg10541994 | 6 | 75994262  | GeneBody/1st exon         | TMEM30A      | -5.447±0.328 | -5.779±0.446 | 7.13E-05 |
| cg26174387 | 6 | 75994825  | GeneBody/1st exon         | LOC100506804 | -4.03±0.449  | -4.334±0.495 | 3.99E-03 |
| cg04555836 | 6 | 76458633  | TSS1500                   | MYO6         | -3.282±0.209 | -3.465±0.273 | 4.34E-04 |
| cg06848288 | 6 | 79788573  | TSS1500                   | PHIP         | -4.923±0.398 | -5.158±0.319 | 7.69E-03 |
| cg22058458 | 6 | 79944186  | GeneBody/1st intron       | HMGN3        | -5.666±0.533 | -6.055±0.57  | 1.83E-03 |
| cg15627524 | 6 | 83777986  | GeneBody/5'UTR/1st intron | DOPEY1       | -3.324±0.538 | -3.856±0.672 | 7.00E-05 |
| cg15185804 | 6 | 83902498  | GeneBody/5'UTR/1st intron | PGM3         | -3.629±0.364 | -3.914±0.48  | 1.50E-03 |
| cg24204740 | 6 | 83903813  | TSS200                    | PGM3         | -4.399±0.329 | -4.653±0.386 | 1.28E-03 |
| cg11763112 | 6 | 84937277  | GeneBody/5'UTR/1st intron | KIAA1009     | -4.797±0.472 | -5.153±0.481 | 1.22E-03 |
| cg22264946 | 6 | 84937441  | TSS200                    | KIAA1009     | -5.957±0.495 | -6.403±0.477 | 1.25E-04 |
| cg17488985 | 6 | 86159426  | GeneBody/5'UTR/1st exon   | NT5E         | -4.003±0.424 | -4.307±0.465 | 2.31E-03 |
| cg07981495 | 6 | 87804765  | GeneBody/5'UTR/1st exon   | CGA          | 2.054±0.462  | 1.734±0.659  | 6.24E-03 |
| cg17341703 | 6 | 88182369  | TSS1500                   | SLC35A1      | -4.199±0.394 | -4.51±0.364  | 6.14E-04 |
| cg10919329 | 6 | 88182879  | GeneBody/1st intron       | SLC35A1      | -4.846±0.392 | -5.129±0.477 | 2.82E-03 |
| cg02486845 | 6 | 88411799  | GeneBody/5'UTR/1st exon   | AKIRIN2      | -3.972±0.341 | -4.193±0.473 | 9.92E-03 |
| cg03786772 | 6 | 88412400  | TSS1500                   | AKIRIN2      | -3.786±0.612 | -4.239±0.567 | 1.24E-03 |
| cg14076411 | 6 | 89673710  | TSS1500                   | RNGTT        | -4.374±0.586 | -4.72±0.588  | 9.49E-03 |
| cg06913228 | 6 | 90062465  | GeneBody/5'UTR/1st exon   | UBE2J1       | -5.771±0.63  | -6.194±0.52  | 2.66E-03 |
| cg19635869 | 6 | 90121153  | GeneBody/1st intron       | RRAGD        | -3.868±0.553 | -4.221±0.437 | 4.03E-03 |
| cg21264329 | 6 | 90348123  | GeneBody/1st exon         | LYRM2        | -3.759±0.332 | -3.963±0.359 | 8.39E-03 |
| cg08947964 | 6 | 90603803  | TSS1500                   | GJA10        | 1.322±0.609  | 0.891±0.869  | 5.29E-03 |
| cg20884697 | 6 | 96025221  | TSS200                    | MANEA        | -4.398±0.311 | -4.723±0.437 | 4.94E-05 |
| cg15832292 | 6 | 96025679  | GeneBody/5'UTR/1st intron | MANEA        | -5.102±0.528 | -5.532±0.629 | 7.50E-04 |
| cg16298282 | 6 | 96969423  | TSS1500                   | UFL1         | -3.319±0.563 | -3.902±0.647 | 2.58E-05 |
| cg16823105 | 6 | 97372572  | GeneBody/5'UTR/1st exon   | KLHL32       | -3.968±0.293 | -4.25±0.359  | 1.00E-04 |
| cg23858074 | 6 | 97730720  | GeneBody/5'UTR/1st intron | MMS22L       | -5.404±0.337 | -5.618±0.314 | 5.21E-03 |
| cg03108701 | 6 | 97731400  | TSS1500                   | MMS22L       | -4.301±0.427 | -4.606±0.481 | 2.59E-03 |
| cg23269225 | 6 | 99395318  | GeneBody/5'UTR/1st intron | FBXL4        | -5.491±0.479 | -5.789±0.559 | 8.90E-03 |
| cg04520084 | 6 | 100016357 | GeneBody/5'UTR/1st intron | CCNC         | -4.791±0.452 | -5.258±0.516 | 2.56E-05 |
| cg06667091 | 6 | 100017988 | TSS1500                   | CCNC         | 1.25±0.268   | 1.049±0.424  | 4.75E-03 |
| cg03664139 | 6 | 101329504 | TSS1500                   | ASCC3        | -5.623±0.426 | -6.128±0.581 | 5.49E-06 |
| cg23047681 | 6 | 105307907 | TSS200                    | HACE1        | -4.935±0.418 | -5.216±0.497 | 4.99E-03 |
| cg20612615 | 6 | 105850408 | GeneBody/1st intron       | PREP         | -4.684±0.344 | -5.072±0.471 | 1.34E-05 |
| cg06218044 | 6 | 105851256 | TSS1500                   | PREP         | -4.545±0.325 | -4.869±0.432 | 7.90E-05 |
| cg17965230 | 6 | 106534206 | GeneBody/5'UTR/1st exon   | PRDM1        | -5.349±0.426 | -5.656±0.449 | 2.03E-03 |
| cg16950012 | 6 | 106773140 | GeneBody/5'UTR/1st intron | ATG5         | -5.253±0.402 | -5.519±0.3   | 2.79E-03 |
| cg04145477 | 6 | 107077629 | GeneBody/1st intron       | QRS1         | -5.078±0.352 | -5.551±0.545 | 1.08E-06 |
| cg04464559 | 6 | 107780641 | GeneBody/5'UTR/1st exon   | PDSS2        | -4.958±0.383 | -5.55±0.541  | 3.30E-08 |
| cg07395788 | 6 | 107780783 | TSS200                    | PDSS2        | -4.43±0.261  | -4.603±0.359 | 7.94E-03 |
| cg05642698 | 6 | 108278844 | GeneBody/1st intron       | SEC63        | -5.092±0.53  | -5.404±0.515 | 9.91E-03 |
| cg01320361 | 6 | 108279781 | TSS1500                   | SEC63        | -4.745±0.288 | -5.168±0.462 | 2.13E-07 |
| cg02504465 | 6 | 108582065 | GeneBody/1st exon         | SNX3         | -5.256±0.438 | -5.729±0.593 | 2.44E-05 |
| cg00180012 | 6 | 108615929 | TSS200                    | LACE1        | -4.303±0.34  | -4.82±0.442  | 8.82E-04 |
| cg12785675 | 6 | 109169698 | GeneBody/5'UTR/1st exon   | ARMC2        | -4.074±0.215 | -4.216±0.28  | 6.98E-03 |
| cg00922727 | 6 | 109415123 | GeneBody/1st exon         | SESN1        | -3.9±0.415   | -4.236±0.581 | 1.35E-03 |
| cg11541187 | 6 | 109415607 | GeneBody/5'UTR/1st exon   | SESN1        | -4.626±0.319 | -5.013±0.502 | 7.72E-06 |
| cg01747191 | 6 | 109449950 | TSS1500                   | CEP57L1      | 2.446±0.447  | 2.723±0.395  | 5.82E-03 |
| cg08550724 | 6 | 109450991 | GeneBody/5'UTR/1st intron | CEP57L1      | 2.485±0.286  | 2.681±0.323  | 4.34E-03 |
| cg01932459 | 6 | 109703513 | GeneBody/1st exon         | CD164        | -6.649±0.54  | -7.119±0.809 | 7.79E-04 |
| cg23832061 | 6 | 109761667 | TSS1500                   | SMPD2        | -5.98±0.545  | -6.386±0.515 | 1.17E-03 |
| cg03976567 | 6 | 110012095 | GeneBody/5'UTR/1st intron | AK9          | -4.142±0.262 | -4.465±0.373 | 3.30E-06 |
| cg18697049 | 6 | 111136368 | GeneBody/5'UTR/1st exon   | CDK19        | -5.446±0.512 | -5.794±0.55  | 3.68E-03 |
| cg23235603 | 6 | 111136979 | TSS1500                   | CDK19        | -4.737±0.346 | -5.14±0.446  | 5.65E-06 |
| cg04128563 | 6 | 111195434 | TSS1500                   | AMD1         | -5.351±0.455 | -5.905±0.603 | 2.93E-06 |
| cg00115714 | 6 | 111196112 | GeneBody/5'UTR/1st exon   | AMD1         | -3.885±0.553 | -4.224±0.482 | 6.29E-03 |
| cg07940485 | 6 | 111409222 | GeneBody/1st exon         | SLC16A10     | -5.439±1.161 | -6.17±1.043  | 5.25E-03 |
| cg07352586 | 6 | 111580316 | TSS200                    | KIAA1919     | -5.667±0.385 | -5.924±0.534 | 7.93E-03 |
| cg19318326 | 6 | 111580704 | GeneBody/5'UTR/1st exon   | KIAA1919     | -5.275±0.362 | -5.556±0.447 | 1.41E-03 |
| cg05668720 | 6 | 112408820 | TSS200                    | TUBE1        | -5.111±0.347 | -5.542±0.472 | 2.26E-06 |
| cg18387216 | 6 | 114291911 | TSS200                    | HDAC2        | -5.405±0.458 | -5.768±0.641 | 1.69E-03 |
| cg00436301 | 6 | 116421736 | TSS1500                   | NT5DC1       | -4.711±0.306 | -5.058±0.45  | 1.65E-05 |
| cg07472159 | 6 | 116447667 | TSS1500                   | COL10A1      | 1.825±0.294  | 2.025±0.318  | 4.03E-03 |
| cg03959219 | 6 | 116575135 | GeneBody/1st exon         | TSPYL4       | -4.232±0.269 | -4.424±0.292 | 2.34E-03 |
| cg15378655 | 6 | 116575429 | TSS200                    | TSPYL4       | -4.039±0.519 | -4.402±0.609 | 3.42E-03 |
| cg15056247 | 6 | 116601073 | GeneBody/5'UTR/1st exon   | TSPYL1       | -5.112±0.47  | -5.495±0.694 | 1.57E-03 |
| cg13980473 | 6 | 116601312 | GeneBody/5'UTR/1st exon   | DSE          | -4.376±0.579 | -4.749±0.658 | 6.49E-03 |
| cg00620629 | 6 | 116989951 | GeneBody/5'UTR/1st exon   | ZUFSP        | -5.108±0.483 | -5.592±0.661 | 8.38E-05 |
| cg13112336 | 6 | 119255874 | GeneBody/5'UTR/1st intron | MCM9         | -3.697±0.142 | -3.808±0.158 | 1.01E-03 |
| cg12657853 | 6 | 122720929 | GeneBody/1st exon         | HSF2         | -4.773±0.286 | -5.274±0.487 | 6.79E-09 |
| cg07240721 | 6 | 126278255 | GeneBody/1st exon         | HINT3        | -3.923±0.272 | -4.184±0.395 | 2.08E-04 |
| cg03059528 | 6 | 127587721 | TSS200                    | RNF146       | -4.371±0.3   | -4.728±0.452 | 8.78E-06 |
| cg11249120 | 6 | 130543838 | GeneBody/5'UTR/1st exon   | SAMD3        | 0.906±0.367  | 0.637±0.51   | 3.98E-03 |
| cg17682309 | 6 | 132834573 | TSS1500                   | STX7         | -5.031±0.446 | -5.387±0.541 | 1.01E-03 |
| cg24692716 | 6 | 133119484 | GeneBody/1st intron       | SLC18B1      | -5.02±0.438  | -5.432±0.536 | 1.31E-04 |
| cg26146086 | 6 | 133135242 | TSS1500                   | RPS12        | -4.759±0.308 | -5.139±0.469 | 4.84E-06 |
| cg13878093 | 6 | 134274457 | GeneBody/5'UTR/1st exon   | TBPL1        | -5.328±0.508 | -5.786±0.599 | 2.14E-04 |
| cg26008464 | 6 | 134373624 | GeneBody/5'UTR/1st exon   | SLC2A12      | -5.059±0.418 | -5.502±0.445 | 1.47E-05 |
| cg03340261 | 6 | 135375900 | GeneBody/5'UTR/1st exon   | HBS1L        | -5.226±0.397 | -5.46±0.385  | 9.87E-03 |
| cg12721546 | 6 | 136611096 | TSS200                    | BCLAF1       | -5.611±0.581 | -5.993±0.521 | 3.60E-03 |
| cg10459515 | 6 | 136611098 | TSS200                    | BCLAF1       | -5.553±0.365 | -5.88±0.585  | 7.39E-04 |
| cg11310692 | 6 | 137143636 | TSS200                    | PEX7         | -4.555±0.315 | -4.897±0.441 | 2.64E-05 |
| cg06779945 | 6 | 138188320 | TSS200                    | TNFAIP3      | -5.095±0.309 | -5.38±0.507  | 6.12E-04 |
| cg14527802 | 6 | 138188823 | GeneBody/5'UTR/1st intron | TNFAIP3      | -4.225±0.462 | -4.658±0.593 | 1.68E-04 |
| cg10780112 | 6 | 138725213 | TSS200                    | HEBP2        | -4.127±0.263 | -3.932±0.283 | 1.61E-03 |
| cg12341414 | 6 | 139309683 | TSS1500                   | REPS1        | -5.276±0.458 | -5.64±0.561  | 1.04E-03 |
| cg11498188 | 6 | 139456038 | TSS1500                   | HECA         | -4.545±0.502 | -4.835±0.391 | 8.79E-03 |
| cg25722142 | 6 | 139695762 | GeneBody/5'UTR/1st exon   | CITED2       | -1.911±0.141 | -2.005±0.182 | 6.61E-03 |
| cg12082568 | 6 | 139696378 | TSS1500                   | CITED2       | -4.164±0.316 | -4.367±0.339 | 6.04E-03 |
| cg25098095 | 6 | 142468318 | TSS200                    | VTA1         | -4.455±0.383 | -4.213±0.411 | 6.76E-03 |
| cg15185286 | 6 | 143381675 | TSS1500                   | AIG1         | -5.313±0.645 | -5.906±0.646 | 1.02E-04 |

|            |   |           |                           |           |              |              |          |
|------------|---|-----------|---------------------------|-----------|--------------|--------------|----------|
| cg21684385 | 6 | 143772210 | GeneBody/1st exon         | PEX3      | -4.835±0.364 | -5.217±0.506 | 4.47E-05 |
| cg07077459 | 6 | 144329052 | GeneBody/5'UTR/1st intron | PLAGL1    | 1.017±0.231  | 1.198±0.412  | 4.89E-03 |
| cg22378065 | 6 | 144329172 | GeneBody/5'UTR/1st intron | PLAGL1    | 0.806±0.19   | 0.98±0.338   | 9.95E-04 |
| cg09106817 | 6 | 149637881 | 0                         | 0         | -4.079±0.452 | -4.451±0.583 | 8.36E-04 |
| cg25513133 | 6 | 149887296 | TSS1500                   | GINM1     | -4.639±0.277 | -4.903±0.476 | 4.88E-04 |
| cg27310686 | 6 | 149888373 | GeneBody/1st intron       | GINM1     | -4.689±0.374 | -5.132±0.519 | 6.11E-06 |
| cg24994350 | 6 | 150038700 | GeneBody/5'UTR/1st intron | LATS1     | -4.207±0.372 | -4.476±0.661 | 9.17E-03 |
| cg11408517 | 6 | 150039536 | TSS200                    | LATS1     | -4.475±0.415 | -4.797±0.553 | 1.76E-03 |
| cg25124223 | 6 | 150067614 | GeneBody/1st exon         | NUP43     | -5.65±0.48   | -6.029±0.568 | 1.01E-03 |
| cg26675382 | 6 | 150067846 | TSS200                    | NUP43     | -2.542±0.415 | -2.809±0.517 | 8.77E-03 |
| cg18418460 | 6 | 150390014 | GeneBody/1st intron       | ULBP3     | -5.99±0.632  | -6.438±0.78  | 3.40E-03 |
| cg14884741 | 6 | 150464644 | GeneBody/1st intron       | PPP1R14C  | -3.225±0.375 | -2.963±0.409 | 2.85E-03 |
| cg21610516 | 6 | 151186758 | TSS200                    | MTHFD1L   | -2.465±0.138 | -2.587±0.239 | 1.35E-03 |
| cg00655307 | 6 | 152128743 | TSS200                    | ESR1      | -3.155±0.914 | -3.904±0.67  | 2.74E-04 |
| cg20253551 | 6 | 152129400 | GeneBody/1st exon         | ESR1      | -2.944±1.157 | -3.654±1.002 | 6.22E-03 |
| cg02720618 | 6 | 152129791 | GeneBody/1st intron       | ESR1      | -3.259±1.287 | -4.003±1.054 | 9.09E-03 |
| cg12471156 | 6 | 155054259 | TSS1500                   | SCAF8     | -5.636±0.411 | -5.913±0.407 | 3.37E-03 |
| cg22432367 | 6 | 157098650 | TSS1500                   | ARID1B    | -3.902±0.318 | -4.196±0.47  | 3.61E-04 |
| cg00502442 | 6 | 157801893 | TSS1500                   | ZDHC14    | -5.086±0.335 | -5.438±0.546 | 1.04E-04 |
| cg09221326 | 6 | 159065141 | GeneBody/1st intron       | DYNLT1    | -4.676±0.306 | -5.02±0.547  | 6.79E-05 |
| cg04185037 | 6 | 159239164 | GeneBody/1st intron       | EZR-AS1   | -4.698±0.41  | -5.049±0.517 | 4.85E-04 |
| cg14515483 | 6 | 160113813 | GeneBody                  | SOD2      | -5.204±0.402 | -5.541±0.594 | 1.12E-03 |
| cg05879334 | 6 | 160183160 | GeneBody/1st exon         | ACAT2     | -6.182±0.546 | -6.602±0.747 | 2.11E-03 |
| cg08142684 | 6 | 160209868 | GeneBody/1st intron       | TCP1      | -4.573±0.605 | -4.958±0.609 | 5.64E-03 |
| cg04794901 | 6 | 160209903 | GeneBody/1st intron       | TCP1      | -5.297±0.505 | -5.737±0.497 | 2.08E-04 |
| cg25282410 | 6 | 160211355 | TSS200                    | MRPL18    | -3.588±0.66  | -4.049±0.851 | 4.40E-03 |
| cg14556618 | 6 | 160390829 | GeneBody/1st intron       | IGF2R     | -5.714±0.493 | -6.097±0.582 | 1.26E-03 |
| cg22685251 | 6 | 161413652 | GeneBody/1st intron       | MAP3K4    | -4.224±0.456 | -4.534±0.597 | 5.79E-03 |
| cg14947494 | 6 | 166796284 | GeneBody/1st intron       | MPC1      | -4.995±0.524 | -5.34±0.584  | 5.24E-03 |
| cg17391474 | 6 | 166796744 | TSS1500                   | MPC1      | -4.947±0.613 | -5.424±0.589 | 7.54E-04 |
| cg22267176 | 6 | 170152116 | GeneBody/1st intron       | C6orf70   | -5.653±0.527 | -6.018±0.575 | 3.23E-03 |
| cg13891659 | 6 | 170190454 | GeneBody/1st exon         | LINC00574 | -4.707±0.545 | -5.073±0.56  | 3.82E-03 |
| cg01956781 | 6 | 170615920 | GeneBody/5'UTR/1st exon   | FAM120B   | -6.772±0.56  | -7.384±0.773 | 2.32E-05 |
| cg06893980 | 6 | 170862231 | GeneBody/1st exon         | PSMB1     | -5±0.31      | -5.362±0.502 | 1.85E-05 |
| cg16127845 | 7 | 1126423   | TSS200                    | GPBR      | -4.126±0.472 | -4.457±0.733 | 7.32E-03 |
| cg17547792 | 7 | 1126723   | GeneBody/5'UTR/1st exon   | GPBR      | -5.176±0.564 | -5.737±0.677 | 5.61E-05 |
| cg13896269 | 7 | 1199727   | GeneBody/5'UTR/1st exon   | ZFAND2A   | -4.417±0.362 | -4.779±0.658 | 3.83E-04 |
| cg01497501 | 7 | 1200135   | TSS1500                   | ZFAND2A   | -6.103±0.573 | -6.516±0.632 | 2.23E-03 |
| cg03862760 | 7 | 1609483   | GeneBody/5'UTR/1st exon   | PSMG3     | -0.417±0.228 | -0.637±0.364 | 2.94E-04 |
| cg10857807 | 7 | 2272392   | GeneBody/5'UTR/1st intron | MAD1L1    | -5.615±0.423 | -6.281±0.707 | 6.53E-08 |
| cg21166555 | 7 | 2272904   | TSS1500                   | MAD1L1    | -4.598±0.46  | -5.015±0.492 | 1.49E-04 |
| cg25533361 | 7 | 2395147   | GeneBody/1st intron       | EIF3B     | -4.418±0.56  | -4.836±0.691 | 2.09E-03 |
| cg03545635 | 7 | 2471551   | GeneBody/5'UTR/1st intron | CHST12    | 1.995±0.244  | 2.163±0.32   | 5.26E-03 |
| cg25175370 | 7 | 2595131   | GeneBody/5'UTR/1st exon   | BRAT1     | -5.549±0.597 | -6.18±0.708  | 2.14E-05 |
| cg24743283 | 7 | 2884365   | TSS1500                   | GNA12     | -4.56±0.506  | -4.917±0.497 | 2.18E-03 |
| cg21349901 | 7 | 4630518   | 0                         | 0         | 1.735±0.348  | 1.456±0.413  | 8.53E-04 |
| cg23512028 | 7 | 5085596   | GeneBody/5'UTR/1st exon   | RBAK      | -4.562±0.633 | -4.969±0.649 | 5.42E-03 |
| cg01527212 | 7 | 5821151   | GeneBody/5'UTR/1st intron | RNF216    | -5.569±0.63  | -6.194±0.729 | 5.19E-05 |
| cg04317940 | 7 | 6048614   | GeneBody/1st intron       | PMS2      | -5.223±0.473 | -5.716±0.574 | 2.84E-05 |
| cg10485724 | 7 | 6049035   | GeneBody/1st exon         | AIMP2     | -4.936±0.549 | -5.321±0.507 | 2.11E-03 |
| cg06666486 | 7 | 6099044   | TSS200                    | EIF2AK1   | -3.185±0.582 | -3.573±0.724 | 6.12E-03 |
| cg26774430 | 7 | 6312054   | GeneBody/1st intron       | CYTH3     | -4.115±0.426 | -4.402±0.508 | 4.92E-03 |
| cg11248491 | 7 | 6312525   | TSS1500                   | CYTH3     | -3.93±0.449  | -4.287±0.477 | 7.47E-04 |
| cg21939482 | 7 | 6388130   | GeneBody/5'UTR/1st intron | FAM220A   | -4.075±0.294 | -4.364±0.367 | 7.89E-05 |
| cg02092706 | 7 | 6388796   | TSS1500                   | FAM220A   | -5.189±0.57  | -5.55±0.569  | 5.86E-03 |
| cg00784357 | 7 | 6413877   | TSS1500                   | RAC1      | -5.311±0.36  | -5.562±0.424 | 3.54E-03 |
| cg24000099 | 7 | 6487512   | GeneBody/5'UTR/1st exon   | DAGLB     | -5.644±0.479 | -6.098±0.654 | 1.85E-04 |
| cg01852328 | 7 | 6487989   | TSS1500                   | DAGLB     | -3.749±0.665 | -4.184±0.753 | 5.68E-03 |
| cg25909811 | 7 | 6523253   | GeneBody/1st intron       | KDELR2    | -5.187±0.639 | -5.768±0.672 | 1.38E-04 |
| cg21212956 | 7 | 6617294   | GeneBody/5'UTR/1st exon   | ZDHC4     | -4.052±0.62  | -4.466±0.65  | 4.02E-03 |
| cg05373276 | 7 | 6865861   | GeneBody/5'UTR/1st exon   | CCZ1B     | -4.938±0.57  | -5.485±0.657 | 8.40E-05 |
| cg21053748 | 7 | 10979772  | GeneBody/5'UTR/1st exon   | NDUFA4    | -4.523±0.309 | -4.875±0.485 | 2.36E-05 |
| cg16837769 | 7 | 10979899  | TSS200                    | NDUFA4    | -4.362±0.398 | -4.792±0.456 | 1.37E-05 |
| cg21597649 | 7 | 12251342  | GeneBody/5'UTR/1st intron | TMEM106B  | -3.969±0.297 | -4.181±0.32  | 2.43E-03 |
| cg21201572 | 7 | 16844606  | GeneBody/5'UTR/1st exon   | AGR2      | -0.345±0.717 | -0.816±0.921 | 7.29E-03 |
| cg24426405 | 7 | 16844852  | TSS200                    | AGR2      | -0.91±0.609  | -1.299±0.718 | 8.15E-03 |
| cg13676215 | 7 | 17337976  | TSS1500                   | AHR       | -1.277±0.496 | -1.597±0.579 | 6.67E-03 |
| cg11166252 | 7 | 17338258  | TSS200                    | AHR       | -6.111±0.529 | -6.45±0.589  | 6.31E-03 |
| cg17864730 | 7 | 20370899  | GeneBody/5'UTR/1st exon   | ITGB8     | -4.646±0.781 | -5.086±0.492 | 8.79E-03 |
| cg16721202 | 7 | 21467390  | TSS1500                   | SP4       | -4.232±0.581 | -4.659±0.589 | 1.56E-03 |
| cg13316191 | 7 | 21985884  | TSS1500                   | CDCATL    | -4.666±0.382 | -5±0.642     | 1.26E-03 |
| cg26716323 | 7 | 22862328  | GeneBody/1st exon         | TOMM7     | -5.043±0.404 | -5.353±0.376 | 8.45E-04 |
| cg12266024 | 7 | 23053912  | TSS200                    | FAM126A   | -4.901±0.487 | -5.423±0.601 | 1.94E-05 |
| cg12100077 | 7 | 23145212  | GeneBody/1st exon         | KLHL7-AS1 | -4.873±0.38  | -5.147±0.388 | 1.95E-03 |
| cg02480835 | 7 | 23221354  | TSS200                    | NUPL2     | -4.523±0.328 | -4.758±0.548 | 8.11E-03 |
| cg03403539 | 7 | 23221679  | GeneBody/5'UTR/1st exon   | NUPL2     | -5.171±0.563 | -5.568±0.622 | 2.77E-03 |
| cg01182585 | 7 | 23338735  | TSS1500                   | MALSU1    | -4.494±0.518 | -4.928±0.597 | 4.89E-04 |
| cg23859078 | 7 | 23339092  | GeneBody/1st exon         | MALSU1    | -5.534±0.513 | -5.854±0.497 | 6.37E-03 |
| cg06452064 | 7 | 23571393  | GeneBody/1st intron       | TRA2A     | -4.789±0.454 | -5.112±0.444 | 1.99E-03 |
| cg00288562 | 7 | 23571645  | GeneBody/5'UTR/1st exon   | TRA2A     | -4.349±0.316 | -4.637±0.54  | 8.32E-04 |
| cg19747852 | 7 | 23571693  | TSS200                    | TRA2A     | -4.422±0.295 | -4.642±0.5   | 5.95E-03 |
| cg08707078 | 7 | 23720292  | GeneBody/1st intron       | FAM221A   | -3.64±0.935  | -4.219±0.607 | 4.34E-03 |
| cg13931228 | 7 | 24612418  | TSS1500                   | MPP6      | -4.313±0.528 | -4.634±0.537 | 8.38E-03 |
| cg15309066 | 7 | 25164988  | TSS200                    | CYCS      | -5.268±0.345 | -5.674±0.572 | 1.87E-05 |
| cg26172108 | 7 | 25220162  | TSS1500                   | C7orf31   | -4.039±0.181 | -4.233±0.391 | 5.00E-04 |
| cg14534464 | 7 | 26191633  | TSS1500                   | NFE2L3    | -4.087±0.671 | -4.59±0.466  | 7.30E-04 |
| cg00485380 | 7 | 26240560  | TSS200                    | HNRNP2B1  | -4.913±0.522 | -5.308±0.465 | 8.91E-04 |
| cg21120786 | 7 | 26904188  | GeneBody/5'UTR/1st exon   | SKAP2     | -2.737±0.32  | -2.932±0.352 | 9.35E-03 |
| cg27009703 | 7 | 27204894  | GeneBody/1st exon         | HOXA9     | 0.499±0.406  | 0.784±0.508  | 3.91E-03 |
| cg03792199 | 7 | 27702785  | TSS200                    | HIBADH    | -4.747±0.412 | -5.092±0.541 | 7.42E-04 |
| cg11899895 | 7 | 27779895  | GeneBody/5'UTR/1st intron | TAX1BP1   | -4.726±0.61  | -5.092±0.605 | 8.86E-03 |
| cg11601662 | 7 | 30066256  | GeneBody/5'UTR/1st exon   | FKBP14    | -4.549±0.354 | -4.933±0.518 | 3.51E-05 |
| cg10982775 | 7 | 30067792  | TSS200                    | PLEKHA8   | -5.043±0.327 | -5.278±0.368 | 2.43E-03 |
| cg23640092 | 7 | 30323845  | TSS200                    | ZNRF2     | -3.529±0.206 | -3.688±0.388 | 6.91E-03 |
| cg16391151 | 7 | 30518197  | GeneBody/5'UTR/1st intron | NOD1      | -5.419±0.438 | -5.687±0.41  | 6.91E-03 |

|            |   |          |                           |          |              |              |          |
|------------|---|----------|---------------------------|----------|--------------|--------------|----------|
| cg15815016 | 7 | 30518667 | TSS1500                   | NOD1     | -4.539±0.363 | -4.844±0.383 | 3.82E-04 |
| cg05142115 | 7 | 30544301 | GeneBody/1st exon         | GGCT     | -4.403±0.375 | -4.873±0.564 | 3.27E-06 |
| cg23780937 | 7 | 30544484 | TSS200                    | GGCT     | -4.997±0.488 | -5.353±0.496 | 1.65E-03 |
| cg02299653 | 7 | 32529972 | GeneBody/1st exon         | LSM5     | -4.169±0.822 | -5.178±0.893 | 1.26E-06 |
| cg14853515 | 7 | 32530038 | TSS200                    | LSM5     | -5.988±0.529 | -6.332±0.556 | 5.20E-03 |
| cg06331674 | 7 | 32534854 | GeneBody/5'UTR/1st exon   | LSM5     | -4.773±0.685 | -5.342±0.654 | 3.52E-04 |
| cg07520158 | 7 | 32535189 | GeneBody/5'UTR/1st exon   | AVL9     | -4.534±0.267 | -4.776±0.415 | 5.51E-04 |
| cg09539271 | 7 | 33168802 | TSS1500                   | BBS9     | -5.776±0.544 | -6.123±0.445 | 4.19E-03 |
| cg09080746 | 7 | 33169470 | GeneBody/5'UTR/1st exon   | BBS9     | -4.507±0.497 | -5.009±0.624 | 5.25E-05 |
| cg12776163 | 7 | 35840706 | GeneBody/5'UTR/1st exon   | 44081    | -4.911±0.503 | -5.484±0.679 | 1.02E-05 |
| cg18607470 | 7 | 36407067 | TSS200                    | KIAA0895 | -5.65±0.396  | -6.095±0.634 | 3.27E-05 |
| cg18491230 | 7 | 36429601 | GeneBody/1st exon         | KIAA0895 | -4.366±0.396 | -4.711±0.403 | 2.25E-04 |
| cg24995381 | 7 | 37780156 | GeneBody/1st exon         | GPR141   | 2.788±0.494  | 2.275±1.04   | 6.12E-04 |
| cg15028436 | 7 | 37888078 | TSS200                    | NME8     | 2.121±0.452  | 1.657±0.716  | 1.22E-04 |
| cg00309056 | 7 | 38218112 | GeneBody/5'UTR/1st intron | STARD3NL | -4.698±0.395 | -4.939±0.313 | 5.92E-03 |
| cg08680731 | 7 | 38948782 | GeneBody/5'UTR/1st exon   | VPS41    | -3.971±0.425 | -4.268±0.448 | 2.72E-03 |
| cg08724636 | 7 | 39663756 | GeneBody/5'UTR/1st intron | RALA     | -5.898±0.657 | -6.436±0.639 | 4.35E-04 |
| cg09405612 | 7 | 42275870 | GeneBody/5'UTR/1st intron | GLI3     | -4.491±1.007 | -5.094±0.744 | 6.33E-03 |
| cg04350646 | 7 | 42972170 | GeneBody/1st intron       | MRPL32   | -5.34±0.609  | -5.842±0.62  | 4.35E-04 |
| cg21070087 | 7 | 43351538 | GeneBody                  | HECW1    | 2.909±0.492  | 2.515±0.97   | 6.29E-03 |
| cg23281417 | 7 | 43622366 | TSS1500                   | STK17A   | -5.14±0.325  | -5.391±0.363 | 1.15E-03 |
| cg00167504 | 7 | 43798622 | GeneBody/5'UTR/1st intron | BLVRA    | -4.332±0.265 | -4.637±0.346 | 7.52E-06 |
| cg11528101 | 7 | 43909044 | GeneBody/1st intron       | MRPS24   | -5.532±0.459 | -6.2±0.673   | 1.47E-07 |
| cg21048501 | 7 | 43909515 | TSS1500                   | MRPS24   | -4.327±0.336 | -4.671±0.485 | 7.92E-05 |
| cg06852744 | 7 | 44142973 | TSS1500                   | AEBP1    | 2.728±0.463  | 2.403±0.69   | 6.39E-03 |
| cg18412613 | 7 | 44240514 | TSS200                    | YKT6     | -3.003±0.207 | -3.207±0.287 | 1.06E-04 |
| cg11609344 | 7 | 44240862 | GeneBody/1st intron       | YKT6     | -3.623±0.338 | -3.888±0.388 | 1.03E-03 |
| cg03521347 | 7 | 44529975 | GeneBody/1st intron       | NUDCD3   | -5.504±0.625 | -6.152±0.668 | 2.09E-05 |
| cg05459203 | 7 | 44530674 | TSS1500                   | NUDCD3   | -4.853±0.526 | -5.224±0.625 | 3.22E-03 |
| cg05057057 | 7 | 44613977 | GeneBody/5'UTR/1st exon   | DDX56    | -4.361±0.269 | -4.532±0.263 | 5.55E-03 |
| cg26817382 | 7 | 44621808 | GeneBody/5'UTR/1st exon   | TMED4    | -5.685±0.588 | -6.086±0.592 | 3.10E-03 |
| cg17269548 | 7 | 44836290 | GeneBody/5'UTR/1st exon   | PPIA     | -1.602±0.405 | -1.851±0.439 | 8.48E-03 |
| cg24319545 | 7 | 44887278 | GeneBody/1st intron       | H2AFV    | -3.614±0.18  | -3.743±0.274 | 5.76E-03 |
| cg22878324 | 7 | 44925316 | TSS1500                   | PURB     | -5.076±0.392 | -5.367±0.448 | 1.81E-03 |
| cg00677811 | 7 | 45040321 | GeneBody/1st intron       | CCM2     | -4.544±0.32  | -4.989±0.528 | 7.92E-07 |
| cg11959821 | 7 | 45151241 | GeneBody/5'UTR/1st intron | TBRG4    | -4.974±0.442 | -5.377±0.683 | 5.13E-04 |
| cg12034229 | 7 | 48018855 | GeneBody/1st intron       | HUS1     | -5.959±0.525 | -6.319±0.537 | 3.08E-03 |
| cg14265670 | 7 | 48128300 | TSS200                    | UPP1     | -4.523±0.244 | -4.925±0.381 | 1.34E-08 |
| cg15359413 | 7 | 50517931 | GeneBody/5'UTR/1st intron | FIGNL1   | -4.867±0.508 | -5.441±0.481 | 3.81E-06 |
| cg07619076 | 7 | 55433148 | GeneBody/5'UTR/1st exon   | LANCL2   | -2.957±0.581 | -3.525±0.717 | 9.46E-05 |
| cg01048931 | 7 | 55639931 | GeneBody/1st intron       | VOPP1    | -4.456±0.599 | -4.907±0.686 | 1.57E-03 |
| cg08107767 | 7 | 56019574 | TSS200                    | MRPS17   | -5.109±0.555 | -5.479±0.515 | 3.34E-03 |
| cg27190537 | 7 | 56131961 | GeneBody/5'UTR/1st exon   | SUMF2    | -5.352±0.517 | -5.743±0.55  | 1.26E-03 |
| cg19759064 | 7 | 56160687 | GeneBody/1st exon         | PHKG1    | -0.603±0.542 | -0.991±0.88  | 7.06E-03 |
| cg26856388 | 7 | 65337895 | TSS1500                   | VKORC1L1 | -3.268±0.19  | -3.066±0.262 | 3.55E-05 |
| cg10774155 | 7 | 65338427 | GeneBody/1st exon         | VKORC1L1 | -5.694±0.602 | -6.229±0.73  | 2.70E-04 |
| cg19319490 | 7 | 65447113 | GeneBody/1st exon         | GUSB     | -5.754±1.246 | -6.499±0.861 | 6.04E-03 |
| cg12463550 | 7 | 65579703 | TSS200                    | CRCP     | -4.846±0.499 | -5.259±0.572 | 5.61E-04 |
| cg15816080 | 7 | 65670215 | TSS200                    | TPST1    | -4.829±0.347 | -5.153±0.619 | 7.95E-04 |
| cg15423613 | 7 | 66093349 | TSS1500                   | KCTD7    | -4.729±0.354 | -5.136±0.549 | 1.85E-05 |
| cg12288365 | 7 | 66094096 | GeneBody/1st exon         | KCTD7    | -5.481±0.384 | -5.906±0.543 | 2.13E-05 |
| cg16075384 | 7 | 66386859 | GeneBody/5'UTR/1st intron | TMEM248  | -4.258±0.319 | -4.685±0.424 | 4.61E-07 |
| cg15753757 | 7 | 69064347 | GeneBody/5'UTR/1st exon   | AUTS2    | -4.289±1.003 | -4.844±0.589 | 7.73E-03 |
| cg07033083 | 7 | 72424763 | GeneBody                  | NSUN5P2  | -2.6±0.406   | -2.915±0.525 | 1.61E-03 |
| cg09390902 | 7 | 72425392 | TSS200                    | NSUN5P2  | -5.53±0.487  | -5.924±0.607 | 9.33E-04 |
| cg01251255 | 7 | 72722951 | TSS200                    | NSUN5    | -5.434±0.526 | -5.884±0.887 | 1.62E-03 |
| cg04134859 | 7 | 73097692 | GeneBody/1st exon         | DNAJC30  | -5.227±0.292 | -5.508±0.372 | 1.11E-04 |
| cg26561611 | 7 | 73097960 | GeneBody/1st exon         | WBSCR22  | -4.771±0.484 | -5.422±0.713 | 7.64E-07 |
| cg14534967 | 7 | 73153139 | GeneBody/1st exon         | ABHD11   | -5.192±0.364 | -5.532±0.423 | 1.21E-04 |
| cg00827369 | 7 | 73588253 | TSS1500                   | EIF4H    | -4.522±0.255 | -4.821±0.419 | 1.88E-05 |
| cg08695830 | 7 | 73703459 | TSS1500                   | CLIP2    | -3.896±0.418 | -4.196±0.552 | 3.70E-03 |
| cg07858745 | 7 | 74072514 | GeneBody/5'UTR/1st intron | GTF2I    | -4.142±0.362 | -4.374±0.383 | 5.86E-03 |
| cg09667122 | 7 | 74268072 | TSS1500                   | GTF2IRD2 | -3.54±0.409  | -3.828±0.56  | 4.80E-03 |
| cg03373857 | 7 | 74489715 | TSS200                    | WBSCR16  | -4.297±0.302 | -4.755±0.599 | 7.10E-07 |
| cg06273569 | 7 | 75157587 | TSS200                    | PMS2P3   | -4.756±0.256 | -4.962±0.275 | 6.71E-04 |
| cg11237883 | 7 | 75677249 | GeneBody/5'UTR/1st exon   | STYXL1   | -4.84±0.33   | -5.317±0.459 | 1.30E-07 |
| cg24242194 | 7 | 75677414 | GeneBody/5'UTR/1st exon   | MDH2     | -5.154±0.445 | -5.556±0.526 | 2.06E-04 |
| cg27376817 | 7 | 75931888 | GeneBody/5'UTR/1st exon   | HSPB1    | -3.648±0.654 | -4.117±0.661 | 1.94E-03 |
| cg04028573 | 7 | 76257006 | TSS1500                   | POMZP3   | -5.159±0.3   | -5.355±0.366 | 6.92E-03 |
| cg10763059 | 7 | 77165728 | TSS1500                   | PTPN12   | -4.063±0.545 | -4.511±0.679 | 8.85E-04 |
| cg05806233 | 7 | 79763748 | TSS1500                   | GNAI1    | -3.807±0.682 | -4.317±0.679 | 1.26E-03 |
| cg10833091 | 7 | 86848751 | GeneBody/1st exon         | TMEM243  | -4.318±0.434 | -4.661±0.533 | 1.12E-03 |
| cg14001567 | 7 | 86974838 | TSS200                    | TP53TG1  | -3.735±0.452 | -4.029±0.588 | 8.06E-03 |
| cg15652797 | 7 | 86974991 | GeneBody/5'UTR/1st exon   | CROT     | -3.963±0.328 | -4.178±0.347 | 4.81E-03 |
| cg13741326 | 7 | 86975244 | GeneBody/5'UTR/1st intron | CROT     | -4.8±0.644   | -5.313±0.398 | 3.38E-04 |
| cg16219122 | 7 | 87343956 | TSS1500                   | ABCB1    | -0.034±0.553 | -0.45±0.696  | 2.03E-03 |
| cg22802739 | 7 | 87505101 | TSS1500                   | DBF4     | -4.184±0.299 | -4.624±0.566 | 7.99E-07 |
| cg11909310 | 7 | 89975786 | TSS200                    | GTPBP10  | -4.372±0.52  | -4.684±0.54  | 9.52E-03 |
| cg21746887 | 7 | 90893279 | TSS1500                   | FZD1     | -4.283±0.728 | -4.772±0.595 | 2.65E-03 |
| cg23723933 | 7 | 91569823 | TSS1500                   | AKAP9    | -4.09±0.24   | -4.433±0.397 | 4.76E-07 |
| cg24896109 | 7 | 91764007 | GeneBody/5'UTR/1st exon   | CYP51A1  | -5.625±0.466 | -5.962±0.52  | 2.27E-03 |
| cg14520511 | 7 | 91875046 | GeneBody/5'UTR/1st exon   | KRIT1    | -4.946±0.616 | -5.442±0.602 | 5.32E-04 |
| cg00084687 | 7 | 92076896 | GeneBody/5'UTR/1st exon   | GATAD1   | -5.389±0.497 | -5.797±0.538 | 5.30E-04 |
| cg24030425 | 7 | 92157488 | GeneBody/1st intron       | PEX1     | -3.78±0.276  | -4.025±0.35  | 3.19E-04 |
| cg27402949 | 7 | 92861678 | GeneBody/5'UTR/1st exon   | CCDC132  | -4.682±0.306 | -5.073±0.446 | 1.80E-06 |
| cg21270593 | 7 | 94293250 | GeneBody                  | PEG10    | 4.68±0.275   | 4.906±0.473  | 2.63E-03 |
| cg04951204 | 7 | 94537584 | GeneBody/5'UTR/1st intron | PPP1R9A  | -3.585±0.356 | -3.909±0.459 | 2.44E-04 |
| cg23285573 | 7 | 95064174 | GeneBody/1st intron       | PON2     | -4.428±0.239 | -4.609±0.296 | 1.86E-03 |
| cg15781316 | 7 | 96339267 | TSS200                    | SHFM1    | -5.327±0.598 | -5.718±0.62  | 4.81E-03 |
| cg24205633 | 7 | 96746928 | GeneBody/5'UTR/1st exon   | ACN9     | -5.558±0.832 | -6.068±0.719 | 6.19E-03 |
| cg23242017 | 7 | 97736138 | TSS200                    | LMTK2    | -5.493±0.612 | -5.98±0.603  | 6.11E-04 |
| cg14640481 | 7 | 97910728 | TSS1500                   | BRI3     | -5.185±0.392 | -5.624±0.581 | 2.16E-05 |
| cg22800631 | 7 | 98476628 | GeneBody/5'UTR/1st intron | TRRAP    | -3.561±0.623 | -4.06±0.707  | 7.81E-04 |
| cg26259610 | 7 | 99005923 | GeneBody/1st intron       | PDAP1    | -4.66±0.248  | -4.864±0.254 | 4.44E-04 |
| cg18176813 | 7 | 99006468 | TSS200                    | BUD31    | -5.141±0.419 | -5.432±0.439 | 2.85E-03 |

|            |   |           |                           |                   |              |              |          |
|------------|---|-----------|---------------------------|-------------------|--------------|--------------|----------|
| cg10256052 | 7 | 99036534  | TSS200                    | <i>CPSF4</i>      | -5.841±0.445 | -6.177±0.63  | 2.76E-03 |
| cg05575043 | 7 | 99097635  | GeneBody/1st exon         | <i>ZNF394</i>     | -4.793±0.621 | -5.227±0.714 | 3.30E-03 |
| cg08652404 | 7 | 99098009  | TSS200                    | <i>ZNF394</i>     | -4.575±0.35  | -4.855±0.436 | 1.04E-03 |
| cg20122491 | 7 | 99102313  | GeneBody/5'UTR/1st exon   | <i>ZKSCAN5</i>    | -5.266±0.479 | -5.849±0.707 | 5.23E-06 |
| cg22622686 | 7 | 99149874  | TSS200                    | <i>FAM200A</i>    | -4.541±0.385 | -4.862±0.406 | 4.22E-04 |
| cg18895155 | 7 | 99214691  | GeneBody/5'UTR/1st intron | <i>ZSCAN25</i>    | -5.6±0.649   | -5.99±0.592  | 7.76E-03 |
| cg14260643 | 7 | 99277394  | GeneBody/1st intron       | <i>CYP3A5</i>     | -0.775±0.624 | -1.288±0.78  | 7.67E-04 |
| cg08604885 | 7 | 99516603  | GeneBody/1st intron       | <i>TRIM4</i>      | -3.999±0.617 | -4.434±0.626 | 2.36E-03 |
| cg03429034 | 7 | 99613105  | TSS200                    | <i>ZKSCAN1</i>    | -4.705±0.416 | -4.972±0.452 | 6.24E-03 |
| cg26670626 | 7 | 99613244  | GeneBody/5'UTR/1st exon   | <i>ZKSCAN1</i>    | -5.345±0.334 | -5.871±0.608 | 1.40E-07 |
| cg12588476 | 7 | 99647494  | GeneBody/5'UTR/1st intron | <i>ZSCAN21</i>    | -4.45±0.367  | -4.788±0.714 | 1.48E-03 |
| cg20150743 | 7 | 99679295  | GeneBody/5'UTR/1st exon   | <i>ZNF3</i>       | -4.817±0.289 | -5.178±0.472 | 6.12E-06 |
| cg24797830 | 7 | 99686956  | GeneBody                  | <i>COPS6</i>      | -4.095±0.465 | -4.584±0.626 | 3.69E-05 |
| cg26568722 | 7 | 99699448  | GeneBody/5'UTR/1st exon   | <i>MCM7</i>       | -4.841±0.313 | -5.072±0.325 | 1.55E-03 |
| cg24555656 | 7 | 99717359  | GeneBody/5'UTR/1st exon   | <i>CNPY4</i>      | -5.628±0.526 | -6.196±0.647 | 1.65E-05 |
| cg22154562 | 7 | 100136517 | TSS1500                   | <i>AGFG2</i>      | -6.402±0.556 | -6.75±0.586  | 7.01E-03 |
| cg03494005 | 7 | 100183994 | GeneBody/5'UTR/1st exon   | <i>FBXO24</i>     | -5.582±0.41  | -5.832±0.415 | 7.90E-03 |
| cg26471020 | 7 | 100209878 | GeneBody/5'UTR/1st intron | <i>MOSPD3</i>     | -4.813±0.455 | -5.089±0.446 | 7.92E-03 |
| cg25251635 | 7 | 100303170 | TSS1500                   | <i>POP7</i>       | -4.507±0.267 | -4.878±0.389 | 3.84E-07 |
| cg11592951 | 7 | 100472745 | GeneBody/5'UTR/1st exon   | <i>SRRT</i>       | -5.943±0.412 | -6.479±0.611 | 1.56E-06 |
| cg19873785 | 7 | 100861253 | TSS1500                   | <i>PLOD3</i>      | -4.456±0.462 | -4.81±0.555  | 1.49E-03 |
| cg18670235 | 7 | 100862016 | TSS1500                   | <i>PLOD3</i>      | -3.223±0.457 | -3.522±0.574 | 7.04E-03 |
| cg05146205 | 7 | 101458365 | TSS1500                   | <i>CUX1</i>       | -4.947±0.425 | -5.304±0.425 | 3.46E-04 |
| cg09648233 | 7 | 102105753 | GeneBody/1st intron       | <i>LRWD1</i>      | -4.65±0.338  | -5.007±0.501 | 5.38E-05 |
| cg23980887 | 7 | 102119346 | GeneBody/5'UTR/1st exon   | <i>POLR2J</i>     | -4.381±0.378 | -4.672±0.539 | 2.43E-03 |
| cg22631642 | 7 | 102312065 | GeneBody/5'UTR/1st exon   | <i>POLR2J2</i>    | -6.232±0.666 | -6.782±0.682 | 4.35E-04 |
| cg22799850 | 7 | 102714871 | GeneBody/5'UTR/1st exon   | <i>FBXL13</i>     | -2.438±0.511 | -2.788±0.687 | 5.85E-03 |
| cg09739907 | 7 | 102789396 | GeneBody/5'UTR/1st exon   | <i>NAPEPLD</i>    | -4.848±0.305 | -5.028±0.289 | 9.27E-03 |
| cg04036714 | 7 | 102789509 | GeneBody/5'UTR/1st exon   | <i>NAPEPLD</i>    | -5.301±0.407 | -5.784±0.505 | 3.52E-06 |
| cg07475247 | 7 | 102938279 | GeneBody/1st intron       | <i>PMPCB</i>      | -4.649±0.357 | -4.944±0.475 | 8.95E-04 |
| cg05566397 | 7 | 104654900 | GeneBody/5'UTR/1st exon   | <i>KMT2E</i>      | -5.246±0.555 | -5.778±0.675 | 1.00E-04 |
| cg00950418 | 7 | 105029125 | GeneBody                  | <i>SRPK2</i>      | -4.443±0.272 | -4.756±0.407 | 1.53E-05 |
| cg03443922 | 7 | 107384711 | GeneBody/1st intron       | <i>CBLL1</i>      | -4.303±0.266 | -4.523±0.331 | 7.40E-04 |
| cg02391387 | 7 | 111202222 | GeneBody/5'UTR/1st exon   | <i>IMMP2L</i>     | -5.338±0.464 | -5.701±0.535 | 1.05E-03 |
| cg16218254 | 7 | 111202755 | TSS200                    | <i>IMMP2L</i>     | -4.093±0.249 | -4.313±0.372 | 6.65E-04 |
| cg24481633 | 7 | 111846146 | GeneBody/1st intron       | <i>DOCK4</i>      | -5.916±0.612 | -6.281±0.609 | 9.32E-03 |
| cg24621354 | 7 | 115850382 | TSS200                    | <i>TES</i>        | -4.475±0.345 | -4.87±0.419  | 6.13E-06 |
| cg00453193 | 7 | 115851050 | GeneBody/1st intron       | <i>TES</i>        | -4.278±0.343 | -4.64±0.417  | 2.42E-05 |
| cg26774312 | 7 | 116139477 | TSS200                    | <i>CAV2</i>       | -4.309±0.439 | -4.74±0.436  | 3.91E-05 |
| cg27242945 | 7 | 116165134 | GeneBody/5'UTR/1st exon   | <i>CAV1</i>       | -4.248±0.898 | -4.774±0.431 | 5.81E-03 |
| cg04677163 | 7 | 116165941 | TSS1500                   | <i>CAV1</i>       | -3.692±0.372 | -3.984±0.321 | 5.72E-04 |
| cg13155059 | 7 | 116502333 | TSS1500                   | <i>CAPZA2</i>     | -4.664±0.401 | -4.983±0.485 | 1.00E-03 |
| cg05937182 | 7 | 116593656 | GeneBody/1st exon         | <i>ST7</i>        | -4.895±0.293 | -5.262±0.514 | 9.91E-06 |
| cg05522288 | 7 | 117824098 | GeneBody/5'UTR/1st exon   | <i>NAA38</i>      | -4.639±0.353 | -4.9±0.331   | 1.26E-03 |
| cg02921068 | 7 | 117824282 | GeneBody/1st exon         | <i>NAA38</i>      | -5.528±0.503 | -5.879±0.622 | 3.88E-03 |
| cg12650011 | 7 | 120498280 | TSS200                    | <i>TSPAN12</i>    | -4.452±0.295 | -4.816±0.444 | 4.62E-06 |
| cg11696575 | 7 | 120591325 | GeneBody                  | <i>ING3</i>       | -5.871±0.604 | -6.352±0.56  | 5.31E-04 |
| cg02946850 | 7 | 126882944 | GeneBody/1st exon         | <i>GRM8</i>       | 0.266±0.692  | 0.228±0.916  | 1.69E-03 |
| cg09868882 | 7 | 126883640 | TSS200                    | <i>GRM8</i>       | 0.734±0.844  | 0.085±0.881  | 1.01E-03 |
| cg09283635 | 7 | 127032512 | GeneBody/5'UTR/1st exon   | <i>ZNF800</i>     | -5.508±0.442 | -6.19±0.649  | 3.99E-08 |
| cg08137040 | 7 | 127033695 | TSS1500                   | <i>ZNF800</i>     | -1.026±0.628 | -1.475±0.72  | 2.62E-03 |
| cg14018807 | 7 | 127225619 | GeneBody/5'UTR/1st exon   | <i>GCC1</i>       | -5.572±0.4   | -5.975±0.657 | 1.95E-04 |
| cg08635249 | 7 | 127983877 | GeneBody/5'UTR/1st exon   | <i>RBM28</i>      | -4.844±0.381 | -5.263±0.552 | 2.65E-05 |
| cg11041966 | 7 | 127983966 | TSS200                    | <i>RBM28</i>      | -4.948±0.397 | -5.298±0.491 | 3.23E-04 |
| cg26083396 | 7 | 128049885 | GeneBody/1st exon         | <i>IMPDH1</i>     | -5.462±0.57  | -5.871±0.707 | 3.09E-03 |
| cg03080344 | 7 | 128116561 | TSS1500                   | <i>METTL2B</i>    | -4.092±0.334 | -4.457±0.424 | 1.55E-05 |
| cg05590567 | 7 | 128117018 | GeneBody/1st intron       | <i>METTL2B</i>    | -4.033±0.305 | -4.298±0.394 | 4.50E-04 |
| cg25664034 | 7 | 128469891 | TSS1500                   | <i>FLNC</i>       | -1.653±0.368 | -1.905±0.408 | 3.66E-03 |
| cg17140815 | 7 | 128502651 | TSS1500                   | <i>ATP6V1F</i>    | -4.65±0.517  | -5.001±0.673 | 5.78E-03 |
| cg16584911 | 7 | 128864557 | TSS1500                   | <i>AHCYL2</i>     | -2.435±0.166 | -2.623±0.254 | 2.15E-05 |
| cg04433306 | 7 | 129592730 | GeneBody/5'UTR/1st exon   | <i>UBE2H</i>      | -3.442±0.479 | -3.139±0.568 | 8.28E-03 |
| cg13360404 | 7 | 129710309 | TSS200                    | <i>KLHDC10</i>    | -5.166±0.287 | -5.551±0.517 | 3.26E-06 |
| cg02855426 | 7 | 129984350 | TSS1500                   | <i>CPA5</i>       | 0.089±0.415  | -0.308±0.608 | 2.22E-04 |
| cg05751159 | 7 | 130081017 | GeneBody/5'UTR/1st exon   | <i>CEP41</i>      | -5.455±0.372 | -5.708±0.378 | 3.28E-03 |
| cg26702875 | 7 | 130352914 | GeneBody/1st intron       | <i>COPG2</i>      | -4.5±0.31    | -4.741±0.381 | 1.36E-03 |
| cg06422910 | 7 | 130352926 | GeneBody/1st intron       | <i>COPG2</i>      | -4.775±0.459 | -5.084±0.477 | 3.72E-03 |
| cg20451802 | 7 | 132937811 | TSS200                    | <i>EXOC4</i>      | -4.483±0.337 | -4.68±0.315  | 9.91E-03 |
| cg22063653 | 7 | 134331376 | TSS200                    | <i>BPGM</i>       | -5.193±0.463 | -5.486±0.475 | 6.17E-03 |
| cg05680424 | 7 | 134331560 | GeneBody/5'UTR/1st exon   | <i>BPGM</i>       | -3.805±0.292 | -4.07±0.401  | 3.24E-04 |
| cg04619859 | 7 | 134855396 | TSS200                    | <i>C7orf49</i>    | -5.461±0.458 | -6.107±0.692 | 3.29E-07 |
| cg00059740 | 7 | 134855689 | TSS200                    | <i>C7orf49</i>    | -5.48±0.447  | -5.894±0.499 | 1.21E-04 |
| cg03266904 | 7 | 135194685 | GeneBody/5'UTR/1st exon   | <i>CNOT4</i>      | -5.752±0.567 | -6.157±0.574 | 2.03E-03 |
| cg07383972 | 7 | 135242951 | GeneBody/1st intron       | <i>NUP205</i>     | -5.004±0.436 | -5.291±0.441 | 4.31E-03 |
| cg26889928 | 7 | 138145433 | GeneBody/1st exon         | <i>TRIM24</i>     | -5.623±0.471 | -6.003±0.588 | 9.37E-04 |
| cg07561400 | 7 | 138794433 | GeneBody/5'UTR/1st exon   | <i>ZC3HAV1</i>    | -4.779±0.334 | -4.982±0.342 | 8.57E-03 |
| cg11609154 | 7 | 139026010 | GeneBody/5'UTR/1st exon   | <i>C7orf55</i>    | -4.577±0.497 | -4.912±0.706 | 7.67E-03 |
| cg15002187 | 7 | 140098492 | TSS200                    | <i>SLC37A3</i>    | -3.959±0.254 | -4.235±0.421 | 6.58E-05 |
| cg23411876 | 7 | 140396886 | TSS200                    | <i>NDUFB2-AS1</i> | -4.847±0.595 | -5.295±0.575 | 1.08E-03 |
| cg17095753 | 7 | 140623924 | GeneBody/1st intron       | <i>BRAF</i>       | -5.179±0.489 | -5.781±0.743 | 4.98E-06 |
| cg23066879 | 7 | 140624057 | GeneBody/1st intron       | <i>BRAF</i>       | -4.486±0.311 | -4.86±0.513  | 1.28E-05 |
| cg11414046 | 7 | 140624194 | GeneBody/1st intron       | <i>BRAF</i>       | -5.301±0.597 | -6.111±0.706 | 2.37E-07 |
| cg14094063 | 7 | 140624470 | GeneBody/1st exon         | <i>BRAF</i>       | -5.987±0.489 | -6.314±0.619 | 6.15E-03 |
| cg03148461 | 7 | 140625066 | TSS1500                   | <i>BRAF</i>       | -3.565±0.5   | -4.082±0.578 | 2.78E-05 |
| cg00338893 | 7 | 140714614 | TSS200                    | <i>MRPS33</i>     | -4.126±0.71  | -4.561±0.567 | 5.73E-03 |
| cg26449836 | 7 | 141438150 | GeneBody/5'UTR/1st exon   | <i>SSBP1</i>      | -4.791±0.478 | -5.186±0.575 | 6.45E-04 |
| cg24980583 | 7 | 141438448 | GeneBody/5'UTR/1st exon   | <i>SSBP1</i>      | -4.607±0.308 | -4.898±0.412 | 1.70E-04 |
| cg14153740 | 7 | 141957702 | GeneBody/5'UTR/1st intron | <i>PRSS58</i>     | 0.974±0.942  | 0.366±0.914  | 4.73E-03 |
| cg10896774 | 7 | 142636840 | GeneBody/1st exon         | <i>C7orf34</i>    | -2.164±0.425 | -2.51±0.532  | 8.61E-04 |
| cg02376703 | 7 | 143106130 | TSS200                    | <i>EPHA1</i>      | -4.413±0.596 | -4.832±0.619 | 2.54E-03 |
| cg19548738 | 7 | 143598702 | GeneBody/5'UTR/1st intron | <i>FAM115A</i>    | -4.342±0.369 | -4.689±0.535 | 2.64E-04 |
| cg23815845 | 7 | 144052025 | TSS1500                   | <i>ARHGEF5</i>    | -3.868±0.367 | -4.122±0.521 | 6.19E-03 |
| cg06979034 | 7 | 144052048 | TSS1500                   | <i>ARHGEF5</i>    | -3.341±0.392 | -3.672±0.544 | 8.32E-04 |
| cg01204439 | 7 | 144533322 | TSS200                    | <i>TPK1</i>       | -3.293±0.241 | -3.454±0.36  | 9.63E-03 |
| cg11681073 | 7 | 148396137 | GeneBody/5'UTR/1st intron | <i>CUL1</i>       | -5.201±0.34  | -5.424±0.438 | 7.54E-03 |
| cg10128868 | 7 | 148725440 | GeneBody/1st exon         | <i>PDI4A</i>      | -4.191±0.45  | -4.501±0.352 | 2.02E-03 |

|            |   |           |                           |            |              |              |          |
|------------|---|-----------|---------------------------|------------|--------------|--------------|----------|
| cg26024206 | 7 | 148892367 | TSS1500                   | ZNF282     | -4.638±0.322 | -4.864±0.415 | 4.09E-03 |
| cg23749760 | 7 | 149471044 | TSS1500                   | ZNF467     | -2.52±0.486  | -2.852±0.626 | 5.20E-03 |
| cg21516287 | 7 | 150020855 | TSS200                    | ACTR3C     | -3.796±0.632 | -4.234±0.666 | 2.96E-03 |
| cg01227741 | 7 | 150211179 | TSS1500                   | GIMAP7     | 2.178±0.716  | 1.567±1.181  | 1.48E-03 |
| cg00323915 | 7 | 150264987 | GeneBody/5'UTR/1st intron | GIMAP4     | -0.304±0.776 | -0.793±0.92  | 8.29E-03 |
| cg20456055 | 7 | 150725256 | TSS1500                   | ABC8       | -5.11±0.376  | -5.418±0.336 | 3.86E-04 |
| cg01685739 | 7 | 150756773 | GeneBody/5'UTR/1st exon   | SLC4A2     | -4.479±0.448 | -4.932±0.617 | 7.51E-05 |
| cg25786436 | 7 | 151573913 | TSS1500                   | PRKAG2-AS1 | -5.291±0.399 | -5.714±0.561 | 4.01E-05 |
| cg10896886 | 7 | 152456700 | TSS200                    | ACTR3B     | -4.603±0.388 | -4.871±0.533 | 5.71E-03 |
| cg11096640 | 7 | 152457432 | GeneBody/1st intron       | ACTR3B     | -4.835±0.272 | -5.14±0.401  | 2.12E-05 |
| cg08782122 | 7 | 153110994 | 0                         | 0          | 4.185±0.579  | 3.749±0.786  | 2.56E-03 |
| cg26738880 | 7 | 154429032 | GeneBody                  | DPP6       | 0.344±0.771  | -0.2±0.858   | 2.79E-03 |
| cg06434470 | 7 | 154429544 | GeneBody                  | DPP6       | 1.7±0.685    | 1.255±0.894  | 8.87E-03 |
| cg17927917 | 7 | 155089006 | TSS1500                   | INSIG1     | -5.536±0.451 | -5.906±0.75  | 2.35E-03 |
| cg22889570 | 8 | 182684    | GeneBody/5'UTR/1st exon   | ZNF596     | -4.978±0.485 | -5.286±0.553 | 7.16E-03 |
| cg09664442 | 8 | 681122    | GeneBody/1st intron       | ERICH1     | -5.698±0.337 | -6.135±0.632 | 8.82E-06 |
| cg17288121 | 8 | 7288014   | TSS200                    | DEFB103A   | 1.243±0.616  | 0.818±0.776  | 4.60E-03 |
| cg05810550 | 8 | 7343451   | GeneBody/1st intron       | DEFB106B   | 1.143±0.607  | 0.648±0.757  | 8.38E-04 |
| cg01092561 | 8 | 9008681   | TSS1500                   | PPP1R3B    | -4.759±0.28  | -5.063±0.569 | 2.71E-04 |
| cg04228628 | 8 | 9413457   | GeneBody/1st exon         | TNKS       | -5.218±0.466 | -5.595±0.621 | 1.16E-03 |
| cg11108432 | 8 | 10697698  | TSS1500                   | PINX1      | -4.734±0.374 | -4.991±0.463 | 4.51E-03 |
| cg20951726 | 8 | 11142737  | GeneBody/1st intron       | MTMR9      | -4.037±0.256 | -4.346±0.387 | 6.75E-06 |
| cg23045373 | 8 | 11324048  | GeneBody/5'UTR/1st intron | FAM167A    | -5.312±0.405 | -5.723±0.615 | 1.12E-04 |
| cg14329976 | 8 | 11627812  | GeneBody/5'UTR            | NEIL2      | -3.65±0.291  | -3.902±0.379 | 4.98E-04 |
| cg22870256 | 8 | 11660209  | GeneBody/5'UTR/1st exon   | FDFT1      | -5.046±0.518 | -5.429±0.684 | 2.80E-03 |
| cg21281001 | 8 | 11725306  | GeneBody/5'UTR/1st intron | CTSB       | -5.103±0.496 | -4.781±0.546 | 5.84E-03 |
| cg26104469 | 8 | 14411685  | GeneBody                  | SGCZ       | -0.312±0.626 | -0.755±0.698 | 3.06E-03 |
| cg03919781 | 8 | 16884225  | TSS1500                   | MICU3      | -3.285±0.721 | -3.728±0.709 | 7.16E-03 |
| cg00825031 | 8 | 17104503  | GeneBody/5'UTR/1st exon   | VPS37A     | -5.761±0.4   | -6.082±0.548 | 1.35E-03 |
| cg11050116 | 8 | 17780536  | GeneBody/5'UTR/1st exon   | PCM1       | -5.449±0.507 | -5.929±0.616 | 1.16E-04 |
| cg13563405 | 8 | 17942526  | TSS200                    | ASAH1      | -4.85±0.437  | -5.197±0.556 | 1.20E-03 |
| cg22708914 | 8 | 19170890  | TSS200                    | SH2D4A     | -2.895±0.398 | -3.18±0.521  | 3.62E-03 |
| cg22108175 | 8 | 19796591  | GeneBody/5'UTR/1st exon   | LPL        | -2.613±0.551 | -2.948±0.474 | 6.50E-03 |
| cg01952458 | 8 | 20054547  | TSS200                    | ATP6V1B2   | -4.459±0.495 | -4.858±0.681 | 1.33E-03 |
| cg11856918 | 8 | 20054956  | GeneBody/1st exon         | ATP6V1B2   | -5.62±0.544  | -6.259±0.644 | 3.57E-06 |
| cg21154823 | 8 | 21947302  | GeneBody/1st intron       | FAM160B2   | -5.212±0.399 | -5.492±0.384 | 2.15E-03 |
| cg06333435 | 8 | 22102724  | GeneBody/5'UTR/1st intron | POLR3D     | -5.887±0.57  | -6.491±0.67  | 1.99E-05 |
| cg02640558 | 8 | 22299141  | GeneBody/1st intron       | PPP3CC     | -5.308±0.513 | -5.685±0.471 | 1.28E-03 |
| cg23696886 | 8 | 22437193  | TSS1500                   | PDLIM2     | -3.955±0.696 | -4.464±0.563 | 1.13E-03 |
| cg09476523 | 8 | 22856635  | TSS1500                   | RHOBTB2    | -5.229±0.462 | -5.676±0.482 | 5.60E-05 |
| cg16861508 | 8 | 22926909  | TSS1500                   | TNFRSF10B  | -5.435±0.516 | -5.745±0.453 | 7.36E-03 |
| cg03664800 | 8 | 23261312  | GeneBody/5'UTR/1st intron | LOXL2      | -3.959±0.436 | -3.593±0.602 | 8.43E-04 |
| cg25944700 | 8 | 23386623  | GeneBody/1st exon         | SLC25A37   | -5.516±0.45  | -5.803±0.48  | 6.23E-03 |
| cg05232067 | 8 | 26240888  | GeneBody/1st intron       | BNIP3L     | -3.998±0.225 | -4.249±0.356 | 3.27E-05 |
| cg10368981 | 8 | 26435313  | TSS200                    | DPYSL2     | -5.654±0.484 | -6.051±0.572 | 6.75E-04 |
| cg21099326 | 8 | 27168591  | GeneBody/1st exon         | TRIM35     | -5.874±0.651 | -6.291±0.577 | 4.48E-03 |
| cg21443261 | 8 | 27169256  | GeneBody/5'UTR/1st intron | PTK2B      | -4.94±0.398  | -5.213±0.376 | 2.71E-03 |
| cg08773844 | 8 | 27630019  | GeneBody/1st intron       | CCDC25     | -5.389±0.46  | -5.712±0.453 | 2.33E-03 |
| cg18249244 | 8 | 27950725  | GeneBody/5'UTR/1st exon   | ELP3       | -5.118±0.733 | -5.687±0.702 | 7.79E-04 |
| cg16729690 | 8 | 28351217  | TSS1500                   | FZD3       | -4.001±0.437 | -4.328±0.517 | 1.81E-03 |
| cg01124961 | 8 | 28747453  | TSS200                    | INTS9      | -4.087±0.268 | -4.278±0.389 | 5.13E-03 |
| cg10220156 | 8 | 29120487  | GeneBody/1st intron       | KIF13B     | -4.31±0.333  | -4.636±0.654 | 7.88E-04 |
| cg00355802 | 8 | 29208983  | TSS1500                   | DUSP4      | -3.989±0.47  | -4.312±0.549 | 4.06E-03 |
| cg18986713 | 8 | 29953064  | GeneBody/1st intron       | LEPROTL1   | -5.283±0.455 | -5.564±0.347 | 5.07E-03 |
| cg15319076 | 8 | 30013987  | GeneBody/1st intron       | DCTN6      | -5.121±0.351 | -5.363±0.356 | 2.85E-03 |
| cg14871856 | 8 | 30515337  | GeneBody/5'UTR/1st intron | GTF2E2     | -5.435±0.437 | -5.77±0.52   | 1.46E-03 |
| cg18356330 | 8 | 30515990  | TSS1500                   | GTF2E2     | -4.872±0.393 | -5.274±0.582 | 8.88E-05 |
| cg07899425 | 8 | 30585046  | GeneBody/1st exon         | GSR        | -4.899±0.297 | -5.247±0.56  | 5.19E-05 |
| cg26910651 | 8 | 30669848  | GeneBody/1st exon         | PPP2CB     | -5.683±0.52  | -6.186±0.708 | 1.36E-04 |
| cg20349695 | 8 | 33330484  | GeneBody/5'UTR/1st intron | FUT10      | -4.634±0.343 | -5.013±0.423 | 1.14E-05 |
| cg03594044 | 8 | 33330726  | TSS200                    | FUT10      | -5.446±0.4   | -5.693±0.455 | 8.94E-03 |
| cg00792687 | 8 | 33370099  | GeneBody/1st exon         | TTI2       | -4.355±0.534 | -4.667±0.487 | 9.69E-03 |
| cg09478597 | 8 | 37594596  | GeneBody/5'UTR/1st intron | ERLIN2     | -6.07±0.607  | -6.624±0.686 | 1.57E-04 |
| cg24318412 | 8 | 37962972  | TSS200                    | ASH2L      | -5.649±0.52  | -6.193±0.561 | 1.88E-05 |
| cg25510610 | 8 | 38240894  | TSS1500                   | WHSC1L1    | -4.11±0.45   | -4.49±0.616  | 7.79E-04 |
| cg04017769 | 8 | 38644939  | GeneBody/5'UTR/1st exon   | TACC1      | -6.051±0.622 | -6.644±0.896 | 2.12E-04 |
| cg14435640 | 8 | 41436176  | GeneBody/5'UTR/1st intron | AGPAT6     | -4.998±0.519 | -5.42±0.486  | 4.35E-04 |
| cg03380773 | 8 | 41504331  | GeneBody/1st intron       | NKX6-3     | -4.779±0.456 | -5.171±0.704 | 9.95E-04 |
| cg12468056 | 8 | 41909961  | TSS1500                   | KAT6A      | -4.95±0.373  | -5.17±0.338  | 8.87E-03 |
| cg07490776 | 8 | 42010169  | TSS1500                   | AP3M2      | -5.883±1.193 | -6.608±1     | 6.40E-03 |
| cg16060664 | 8 | 42010866  | GeneBody/5'UTR/1st intron | AP3M2      | -5.95±0.428  | -6.257±0.521 | 3.02E-03 |
| cg22960501 | 8 | 42128498  | TSS1500                   | IKBKB      | -5.441±0.61  | -5.925±0.576 | 5.78E-04 |
| cg04223844 | 8 | 42128868  | GeneBody/5'UTR/1st exon   | IKBKB      | -4.582±0.472 | -4.964±0.455 | 4.76E-04 |
| cg20264731 | 8 | 42195644  | TSS1500                   | POLB       | -4.37±0.615  | -4.727±0.501 | 8.89E-03 |
| cg11415932 | 8 | 42196139  | GeneBody/5'UTR/1st exon   | POLB       | -4.751±0.237 | -4.897±0.225 | 6.92E-03 |
| cg14408969 | 8 | 42396118  | TSS200                    | SMIM19     | -4.438±0.356 | -4.662±0.29  | 4.67E-03 |
| cg02450599 | 8 | 42698393  | GeneBody/5'UTR/1st exon   | THAP1      | -4.583±0.288 | -4.962±0.456 | 1.77E-06 |
| cg27043582 | 8 | 42752981  | GeneBody/1st intron       | HOKK3      | -3.507±0.552 | -3.847±0.611 | 8.73E-03 |
| cg25861458 | 8 | 42948482  | TSS200                    | SGK196     | -4.508±0.317 | -4.772±0.477 | 1.30E-03 |
| cg24792272 | 8 | 48873190  | GeneBody/5'UTR/1st exon   | MCM4       | -4.101±0.463 | -4.555±0.652 | 1.29E-04 |
| cg16104446 | 8 | 48873951  | GeneBody/1st intron       | MCM4       | -2.803±0.183 | -2.95±0.227  | 9.40E-04 |
| cg15585987 | 8 | 50824749  | GeneBody/5'UTR/1st exon   | SNTG1      | 0.074±0.532  | -0.295±0.789 | 6.85E-03 |
| cg04229238 | 8 | 53627628  | TSS1500                   | RB1CC1     | -4.177±0.494 | -4.564±0.642 | 1.47E-03 |
| cg11050527 | 8 | 54755511  | GeneBody/5'UTR/1st exon   | ATP6V1H    | -3.904±0.205 | -4.168±0.345 | 4.16E-06 |
| cg06557606 | 8 | 54756224  | TSS1500                   | ATP6V1H    | -4.042±0.654 | -4.477±0.623 | 3.60E-03 |
| cg01677098 | 8 | 54935025  | TSS200                    | TCEA1      | -5.685±0.557 | -6.322±0.677 | 6.21E-06 |
| cg16889368 | 8 | 55047599  | TSS200                    | MRPL15     | -4.312±0.443 | -4.672±0.711 | 2.25E-03 |
| cg10485472 | 8 | 56686346  | TSS1500                   | TMEM68     | -4.451±0.345 | -4.787±0.561 | 2.88E-04 |
| cg10539712 | 8 | 56792571  | GeneBody/5'UTR/1st exon   | LYN        | -3.582±0.335 | -3.829±0.538 | 5.56E-03 |
| cg04187545 | 8 | 56987050  | GeneBody/5'UTR/1st exon   | RPS20      | -3.878±0.565 | -4.238±0.69  | 8.26E-03 |
| cg13208732 | 8 | 57124347  | GeneBody/5'UTR/1st exon   | CHCHD7     | -5.798±0.426 | -6.264±0.61  | 2.65E-05 |
| cg13573276 | 8 | 57232898  | GeneBody/5'UTR/1st exon   | SDR16C5    | -2.926±0.526 | -3.302±0.663 | 3.39E-03 |
| cg11550426 | 8 | 59465609  | TSS200                    | SDCBP      | -4.778±0.289 | -5.08±0.43   | 6.46E-05 |
| cg23687960 | 8 | 63951868  | TSS1500                   | GGH        | -5.012±1.025 | -5.599±0.668 | 8.11E-03 |
| cg07448460 | 8 | 63951879  | TSS1500                   | GGH        | -3.723±0.957 | -4.259±0.633 | 9.70E-03 |

|            |   |           |                           |                     |              |              |          |
|------------|---|-----------|---------------------------|---------------------|--------------|--------------|----------|
| cg02982690 | 8 | 65492846  | GeneBody/5'UTR/1st exon   | <i>BHLHE22</i>      | -3.978±1.202 | -4.728±1.107 | 5.84E-03 |
| cg20587336 | 8 | 66546482  | TSS200                    | <i>ARMC1</i>        | -4.16±0.402  | -4.448±0.608 | 5.60E-03 |
| cg14299177 | 8 | 66557547  | GeneBody/5'UTR/1st intron | <i>MTFR1</i>        | -5.779±0.323 | -6.042±0.391 | 7.90E-04 |
| cg17045009 | 8 | 67579782  | TSS200                    | <i>C8orf44-SGK3</i> | -4.19±0.373  | -4.5±0.459   | 6.67E-04 |
| cg19082446 | 8 | 67624552  | TSS200                    | <i>SGK3</i>         | -2.398±0.372 | -2.13±0.645  | 8.49E-03 |
| cg02569333 | 8 | 67625280  | GeneBody/5'UTR/1st intron | <i>SGK3</i>         | -4.813±0.566 | -5.199±0.478 | 2.40E-03 |
| cg17747005 | 8 | 68864324  | TSS1500                   | <i>PREX2</i>        | -3.484±0.939 | -4.038±0.791 | 8.12E-03 |
| cg09378940 | 8 | 71581306  | GeneBody/1st exon         | <i>LACTB2</i>       | -4.352±0.244 | -4.617±0.317 | 1.87E-05 |
| cg13554114 | 8 | 73921144  | GeneBody/1st exon         | <i>TERF1</i>        | -4.513±0.265 | -4.844±0.389 | 2.99E-06 |
| cg02584520 | 8 | 74659043  | GeneBody/5'UTR/1st exon   | <i>STAU2</i>        | -4.745±0.393 | -5.051±0.573 | 2.29E-03 |
| cg01041367 | 8 | 74888080  | TSS1500                   | <i>TMEM70</i>       | -3.733±0.602 | -4.096±0.553 | 7.62E-03 |
| cg06334496 | 8 | 74888924  | GeneBody/5'UTR/1st intron | <i>TMEM70</i>       | -4.456±0.341 | -4.838±0.385 | 6.99E-06 |
| cg23599843 | 8 | 75234269  | TSS1500                   | <i>JPH1</i>         | -2.535±0.458 | -2.841±0.545 | 5.27E-03 |
| cg23087084 | 8 | 77912333  | GeneBody/5'UTR/1st exon   | <i>PEX2</i>         | -5.191±0.497 | -5.496±0.454 | 6.61E-03 |
| cg23512958 | 8 | 79717776  | TSS200                    | <i>IL7</i>          | -5.139±0.606 | -5.576±0.682 | 2.28E-03 |
| cg15576233 | 8 | 80679932  | GeneBody/5'UTR/1st exon   | <i>HEY1</i>         | -5.93±0.477  | -6.327±0.461 | 3.59E-04 |
| cg02595263 | 8 | 80942618  | TSS200                    | <i>MRPS28</i>       | -4.92±0.352  | -5.324±0.428 | 5.77E-06 |
| cg16746631 | 8 | 82598140  | GeneBody                  | <i>IMPA1</i>        | -4.592±0.421 | -4.863±0.497 | 6.99E-03 |
| cg26258330 | 8 | 82633130  | GeneBody/1st intron       | <i>ZFAND1</i>       | -4.132±0.368 | -4.526±0.345 | 9.11E-06 |
| cg24229963 | 8 | 82633648  | TSS200                    | <i>ZFAND1</i>       | -4.697±0.264 | -4.876±0.379 | 7.33E-03 |
| cg17029151 | 8 | 82644517  | TSS200                    | <i>CHMP4C</i>       | -4.173±0.351 | -4.451±0.477 | 1.50E-03 |
| cg06027949 | 8 | 82754900  | TSS1500                   | <i>SNX16</i>        | -3.783±0.615 | -4.227±0.663 | 2.33E-03 |
| cg14830952 | 8 | 86089500  | TSS200                    | <i>E2F5</i>         | -5.508±0.588 | -6.092±0.664 | 4.68E-05 |
| cg06242827 | 8 | 87355431  | GeneBody/5'UTR/1st intron | <i>WWP1</i>         | -4.77±0.412  | -5.098±0.548 | 1.35E-03 |
| cg01244871 | 8 | 87520844  | GeneBody/1st exon         | <i>RMDN1</i>        | -5.492±0.381 | -5.721±0.402 | 9.66E-03 |
| cg10473004 | 8 | 87526705  | GeneBody/5'UTR/1st exon   | <i>CPNE3</i>        | -5.508±0.477 | -5.877±0.601 | 1.51E-03 |
| cg01587454 | 8 | 88886051  | GeneBody/1st exon         | <i>DCAF4L2</i>      | 2.458±0.402  | 2.179±0.661  | 9.83E-03 |
| cg17703554 | 8 | 88886339  | TSS200                    | <i>DCAF4L2</i>      | 2.442±0.855  | 1.885±1.011  | 6.39E-03 |
| cg16852892 | 8 | 89339473  | GeneBody/5'UTR/1st exon   | <i>MMP16</i>        | -4.472±0.72  | -4.926±0.798 | 7.28E-03 |
| cg05604720 | 8 | 90769698  | TSS1500                   | <i>RIPK2</i>        | -4.286±0.29  | -4.469±0.323 | 7.20E-03 |
| cg15054260 | 8 | 90769710  | TSS1500                   | <i>RIPK2</i>        | -3.91±0.2    | -4.204±0.37  | 7.36E-07 |
| cg15842483 | 8 | 90914033  | TSS200                    | <i>OSGIN2</i>       | -4.153±0.605 | -4.504±0.504 | 9.09E-03 |
| cg07084161 | 8 | 90996382  | GeneBody/1st intron       | <i>NBN</i>          | -4.547±0.443 | -4.861±0.411 | 1.89E-03 |
| cg18888595 | 8 | 92082609  | GeneBody/1st exon         | <i>OTUD6B</i>       | -5.141±0.54  | -5.516±0.711 | 4.91E-03 |
| cg06543761 | 8 | 94929239  | TSS200                    | <i>PDP1</i>         | -5.922±0.473 | -6.277±0.554 | 1.71E-03 |
| cg16208136 | 8 | 95274252  | GeneBody/5'UTR/1st intron | <i>GEM</i>          | -3.704±0.408 | -4.008±0.365 | 1.07E-03 |
| cg16328273 | 8 | 95908119  | TSS1500                   | <i>CCNE2</i>        | -5.933±0.466 | -6.327±0.611 | 6.60E-04 |
| cg23644127 | 8 | 96037660  | GeneBody/1st intron       | <i>NDUFAF6</i>      | -4.026±0.414 | -4.274±0.368 | 7.56E-03 |
| cg18317951 | 8 | 96145702  | TSS1500                   | <i>PLEKHF2</i>      | -4.361±0.411 | -4.68±0.477  | 1.23E-03 |
| cg23862908 | 8 | 96281399  | GeneBody/1st exon         | <i>C8orf37</i>      | -4.939±0.346 | -5.242±0.51  | 7.10E-04 |
| cg05237543 | 8 | 98656054  | TSS1500                   | <i>MTDH</i>         | -4.145±0.732 | -4.722±0.851 | 1.01E-03 |
| cg15399561 | 8 | 99129939  | TSS200                    | <i>POP1</i>         | -5.015±0.365 | -5.475±0.611 | 6.20E-06 |
| cg27147306 | 8 | 99837480  | GeneBody/1st intron       | <i>STK3</i>         | -3.987±0.464 | -4.453±0.489 | 3.28E-05 |
| cg00420715 | 8 | 100025364 | TSS200                    | <i>VPS13B</i>       | -5.515±0.396 | -5.75±0.407  | 9.95E-03 |
| cg00155167 | 8 | 100025831 | GeneBody/1st intron       | <i>VPS13B</i>       | -5.088±0.677 | -5.524±0.694 | 5.32E-03 |
| cg24267801 | 8 | 100905507 | GeneBody/5'UTR/1st intron | <i>COX6C</i>        | -4.122±0.251 | -4.322±0.321 | 1.17E-03 |
| cg12125691 | 8 | 100906062 | GeneBody/5'UTR/1st exon   | <i>COX6C</i>        | -4.725±0.351 | -4.982±0.404 | 2.12E-03 |
| cg13919215 | 8 | 101162909 | GeneBody/5'UTR/1st exon   | <i>POLR2K</i>       | -4.339±0.694 | -4.8±0.746   | 4.43E-03 |
| cg14358709 | 8 | 101321928 | GeneBody/5'UTR/1st intron | <i>RNF19A</i>       | -5.235±0.46  | -5.58±0.498  | 1.42E-03 |
| cg11906718 | 8 | 101322791 | TSS1500                   | <i>RNF19A</i>       | -2±0.171     | -2.12±0.206  | 3.43E-03 |
| cg12548064 | 8 | 101571911 | GeneBody/5'UTR/1st exon   | <i>ANKRD46</i>      | -4.99±0.384  | -5.288±0.39  | 8.56E-04 |
| cg23737055 | 8 | 101572127 | TSS200                    | <i>ANKRD46</i>      | -2.901±0.199 | -3.085±0.266 | 2.32E-04 |
| cg20304401 | 8 | 101733920 | GeneBody/5'UTR/1st exon   | <i>PABPC1</i>       | -2.286±0.341 | -2.001±0.403 | 5.35E-04 |
| cg16124821 | 8 | 102218091 | TSS200                    | <i>ZNF706</i>       | -4.595±0.306 | -4.923±0.538 | 1.15E-04 |
| cg07065941 | 8 | 103667760 | GeneBody/1st intron       | <i>KLF10</i>        | -3.654±0.191 | -3.499±0.239 | 8.86E-04 |
| cg24115571 | 8 | 104310713 | GeneBody/5'UTR/1st exon   | <i>FZD6</i>         | -3.773±0.429 | -4.065±0.498 | 4.22E-03 |
| cg05275231 | 8 | 104427896 | TSS1500                   | <i>SLC25A32</i>     | -3.779±0.732 | -4.228±0.742 | 7.70E-03 |
| cg15484019 | 8 | 109455575 | TSS1500                   | <i>EMC2</i>         | -4.585±0.271 | -4.964±0.411 | 3.92E-07 |
| cg26021476 | 8 | 110346385 | TSS200                    | <i>NUDCD1</i>       | -5.251±0.386 | -5.662±0.468 | 2.04E-05 |
| cg06084735 | 8 | 110346664 | GeneBody/1st exon         | <i>ENY2</i>         | -5.364±0.418 | -5.834±0.687 | 3.72E-05 |
| cg25824226 | 8 | 110551708 | TSS1500                   | <i>EBAG9</i>        | -4.652±0.265 | -4.847±0.313 | 2.14E-03 |
| cg17452277 | 8 | 110551976 | GeneBody/5'UTR/1st exon   | <i>EBAG9</i>        | -5.53±0.531  | -5.84±0.459  | 9.16E-03 |
| cg02735071 | 8 | 117767874 | GeneBody/1st intron       | <i>E1F3H</i>        | -4.345±0.258 | -4.622±0.425 | 8.09E-05 |
| cg14729071 | 8 | 117886537 | TSS200                    | <i>RAD21-AS1</i>    | -3.561±0.223 | -3.852±0.303 | 8.58E-07 |
| cg05160935 | 8 | 118532754 | TSS1500                   | <i>MED30</i>        | -4.656±0.407 | -4.936±0.621 | 8.01E-03 |
| cg08197122 | 8 | 120868512 | TSS1500                   | <i>DSCC1</i>        | -4.239±0.305 | -4.468±0.49  | 4.62E-03 |
| cg05365525 | 8 | 120885882 | TSS200                    | <i>DEPTOR</i>       | -4.378±0.398 | -4.658±0.656 | 8.75E-03 |
| cg21051423 | 8 | 121457935 | TSS1500                   | <i>MRPL13</i>       | -4.518±0.339 | -4.914±0.462 | 7.03E-06 |
| cg19275050 | 8 | 122653619 | GeneBody/5'UTR/1st exon   | <i>HAS2</i>         | -3.007±0.708 | -3.5±0.737   | 2.72E-03 |
| cg12254515 | 8 | 124054090 | GeneBody/1st intron       | <i>DERL1</i>        | -5.228±0.531 | -5.696±0.674 | 3.57E-04 |
| cg27121132 | 8 | 124054909 | TSS1500                   | <i>DERL1</i>        | -4.429±0.462 | -4.819±0.631 | 7.84E-04 |
| cg18604888 | 8 | 124408541 | GeneBody/1st exon         | <i>ATAD2</i>        | -3.892±0.226 | -4.187±0.397 | 4.48E-06 |
| cg22721186 | 8 | 124408918 | TSS1500                   | <i>ATAD2</i>        | -5.211±0.76  | -5.684±0.618 | 5.12E-03 |
| cg08573893 | 8 | 124428540 | TSS1500                   | <i>WDYHV1</i>       | -4.246±0.755 | -4.706±0.631 | 6.39E-03 |
| cg12646585 | 8 | 124429417 | GeneBody/1st intron       | <i>WDYHV1</i>       | -4.33±0.825  | -4.844±0.761 | 6.01E-03 |
| cg11172196 | 8 | 125384789 | GeneBody/5'UTR/1st exon   | <i>TMEM65</i>       | -4.847±0.5   | -5.269±0.44  | 2.53E-04 |
| cg00465846 | 8 | 125486974 | TSS200                    | <i>RNF139</i>       | -5.795±0.57  | -6.376±0.695 | 4.03E-05 |
| cg11719412 | 8 | 125551441 | GeneBody/5'UTR/1st exon   | <i>NDUFB9</i>       | -6.042±0.443 | -6.409±0.578 | 8.23E-04 |
| cg04618607 | 8 | 126011005 | GeneBody/5'UTR/1st exon   | <i>SQLE</i>         | -5.1±0.456   | -5.376±0.388 | 6.72E-03 |
| cg20379012 | 8 | 126103681 | GeneBody/5'UTR/1st intron | <i>KIAA0196</i>     | -5.423±0.317 | -5.721±0.458 | 2.69E-04 |
| cg08715135 | 8 | 126442747 | GeneBody/5'UTR/1st exon   | <i>TRIB1</i>        | -4.724±0.332 | -5.07±0.464  | 4.90E-05 |
| cg15312298 | 8 | 127570908 | TSS200                    | <i>FAM84B</i>       | -1.298±0.142 | -1.402±0.162 | 2.02E-03 |
| cg18152311 | 8 | 130951244 | GeneBody/5'UTR/1st intron | <i>FAM49B</i>       | -4.368±0.749 | -4.864±0.876 | 5.42E-03 |
| cg27016990 | 8 | 133492476 | GeneBody/1st exon         | <i>KCNQ3</i>        | -4.094±2.144 | -5.535±1.573 | 2.33E-03 |
| cg13755023 | 8 | 133687491 | GeneBody/1st intron       | <i>LRR6</i>         | -4.469±0.543 | -4.856±0.469 | 1.61E-03 |
| cg16551261 | 8 | 133687929 | TSS200                    | <i>LRR6</i>         | -3.429±0.633 | -3.837±0.478 | 3.53E-03 |
| cg09102409 | 8 | 134308734 | GeneBody/5'UTR/1st intron | <i>NDRG1</i>        | -3.692±0.504 | -4.167±0.703 | 2.15E-04 |
| cg19791277 | 8 | 136469780 | GeneBody/5'UTR/1st exon   | <i>KHDRBS3</i>      | -6.006±0.794 | -6.566±0.91  | 3.01E-03 |
| cg03396229 | 8 | 139926571 | TSS1500                   | <i>COL22A1</i>      | -3.425±0.88  | -3.939±0.699 | 8.15E-03 |
| cg12002314 | 8 | 141521209 | TSS200                    | <i>CHAC1</i>        | -4.007±0.258 | -4.273±0.451 | 2.08E-04 |
| cg22610305 | 8 | 141521720 | GeneBody/1st exon         | <i>CHAC1</i>        | -4.661±0.284 | -5.089±0.511 | 3.28E-07 |
| cg16286776 | 8 | 141644897 | GeneBody/1st intron       | <i>AGO2</i>         | -5±0.456     | -5.876±0.563 | 7.36E-04 |
| cg24473633 | 8 | 142138319 | TSS1500                   | <i>DENND3</i>       | -4.901±0.358 | -5.205±0.425 | 4.57E-04 |
| cg21240812 | 8 | 143483748 | GeneBody/5'UTR/1st intron | <i>TSNARE1</i>      | -4.564±0.659 | -5.062±0.543 | 8.10E-04 |
| cg10104451 | 8 | 143696006 | TSS200                    | <i>ARC</i>          | -3.125±0.455 | -3.489±0.668 | 1.78E-03 |

|            |   |           |                           |            |              |              |          |
|------------|---|-----------|---------------------------|------------|--------------|--------------|----------|
| cg10913563 | 8 | 143808814 | GeneBody/1st exon         | THEM6      | -4.041±0.422 | -3.67±0.392  | 1.64E-04 |
| cg10500909 | 8 | 144000015 | TSS1500                   | CYP11B2    | 0.878±0.619  | 0.434±0.819  | 3.73E-03 |
| cg06597861 | 8 | 144100572 | GeneBody/5'UTR/1st intron | LY6E       | -4.862±0.362 | -5.208±0.373 | 6.47E-05 |
| cg03773789 | 8 | 144348945 | TSS1500                   | GLI4       | -3.509±0.503 | -3.842±0.498 | 3.98E-03 |
| cg16007680 | 8 | 144349898 | GeneBody/5'UTR/1st intron | GLI4       | -5.62±0.62   | -6.058±0.676 | 2.61E-03 |
| cg23088430 | 8 | 144679052 | GeneBody/5'UTR/1st exon   | EEF1D      | -4.441±0.365 | -4.671±0.416 | 7.72E-03 |
| cg15555727 | 8 | 144692268 | TSS1500                   | PYCRL      | -3.574±0.225 | -3.825±0.324 | 2.04E-05 |
| cg17150465 | 8 | 144897558 | TSS200                    | SCRIB      | -6.059±0.51  | -6.388±0.54  | 5.63E-03 |
| cg01242619 | 8 | 145049472 | GeneBody                  | PLEC       | -2.701±0.433 | -3.003±0.465 | 2.94E-03 |
| cg08020051 | 8 | 145137133 | TSS1500                   | GPAA1      | -4.244±0.457 | -4.735±0.591 | 2.29E-05 |
| cg20669525 | 8 | 145137896 | GeneBody/1st intron       | GPAA1      | -5.412±0.398 | -5.798±0.614 | 2.28E-04 |
| cg06495924 | 8 | 145149574 | TSS1500                   | CYC1       | -3.8±0.42    | -4.096±0.677 | 8.05E-03 |
| cg08825571 | 8 | 145159373 | GeneBody/5'UTR/1st exon   | MAF1       | -5.413±0.683 | -6.036±0.653 | 1.04E-04 |
| cg15984612 | 8 | 145514624 | GeneBody/1st intron       | BOP1       | -4.429±0.381 | -4.804±0.499 | 9.20E-05 |
| cg03347966 | 8 | 145582459 | GeneBody/5'UTR/1st intron | SLC52A2    | -4.725±0.515 | -5.136±0.579 | 7.98E-04 |
| cg20326853 | 8 | 145635294 | TSS1500                   | CPSF1      | -4.284±0.385 | -4.566±0.577 | 4.55E-03 |
| cg02226871 | 8 | 145653662 | GeneBody/5'UTR/1st intron | VPS28      | -5.314±0.333 | -5.573±0.494 | 2.53E-03 |
| cg11238505 | 8 | 145691776 | GeneBody/5'UTR/1st exon   | KIFC2      | -4.745±0.399 | -5.006±0.511 | 7.46E-03 |
| cg04515567 | 8 | 145701568 | GeneBody/5'UTR/1st exon   | FOXH1      | 2.404±0.225  | 2.553±0.236  | 4.34E-03 |
| cg15857475 | 8 | 145742913 | GeneBody                  | RECQL4     | -5.089±0.438 | -5.401±0.64  | 5.33E-03 |
| cg11609366 | 8 | 146018277 | TSS1500                   | RPL8       | -4.64±0.524  | -5.068±0.587 | 6.16E-04 |
| cg27449959 | 8 | 146024786 | GeneBody/5'UTR/1st intron | ZNF517     | -3.337±0.477 | -3.664±0.597 | 4.79E-03 |
| cg13551243 | 8 | 146052742 | TSS200                    | ZNF7       | -4.692±0.436 | -4.979±0.489 | 5.23E-03 |
| cg26421123 | 8 | 146078231 | GeneBody/5'UTR/1st intron | COMM5      | -4.846±0.571 | -5.212±0.597 | 5.82E-03 |
| cg13592003 | 8 | 146126815 | GeneBody/5'UTR/1st exon   | ZNF250     | -5.555±0.337 | -6.025±0.596 | 1.37E-06 |
| cg25201980 | 8 | 146127417 | TSS1500                   | ZNF250     | -5.108±0.361 | -5.593±0.429 | 3.06E-07 |
| cg10935709 | 9 | 179280    | TSS1500                   | CBWD1      | -5.119±0.356 | -5.399±0.352 | 7.02E-04 |
| cg21140292 | 9 | 2015788   | GeneBody/5'UTR/1st intron | SMARCA2    | -4.89±0.418  | -5.148±0.49  | 9.61E-03 |
| cg21331335 | 9 | 2717325   | TSS200                    | KCNV2      | 3.137±0.254  | 3.294±0.22   | 5.60E-03 |
| cg21387302 | 9 | 3526198   | TSS1500                   | RFX3       | -3.905±0.459 | -4.224±0.564 | 4.02E-03 |
| cg04972545 | 9 | 3526297   | TSS1500                   | RFX3       | -4.236±0.435 | -4.509±0.526 | 9.20E-03 |
| cg24611631 | 9 | 4490288   | TSS200                    | SLC1A1     | -4.752±0.566 | -5.147±0.445 | 1.76E-03 |
| cg06207460 | 9 | 4741011   | GeneBody/1st exon         | AK3        | -2.763±0.368 | -2.439±0.445 | 3.10E-04 |
| cg18519564 | 9 | 4792419   | TSS1500                   | RCL1       | -4.368±0.485 | -4.668±0.514 | 7.92E-03 |
| cg01036173 | 9 | 5437898   | GeneBody/5'UTR/1st exon   | PLGRKT     | -5.382±0.579 | -5.864±0.607 | 4.10E-04 |
| cg02823866 | 9 | 5450410   | TSS200                    | CD274      | -4.872±0.645 | -5.264±0.576 | 6.97E-03 |
| cg20595300 | 9 | 6413167   | GeneBody/1st exon         | UHRF2      | -5.25±0.339  | -5.506±0.42  | 1.91E-03 |
| cg13875807 | 9 | 6758935   | GeneBody/5'UTR/1st intron | KDM4C      | -3.566±0.32  | -3.824±0.315 | 5.43E-04 |
| cg22153116 | 9 | 15306736  | GeneBody/1st intron       | TTC39B     | -4.648±0.277 | -5.097±0.45  | 2.99E-08 |
| cg16645539 | 9 | 15422589  | TSS200                    | SNAPC3     | -5.387±0.497 | -5.756±0.674 | 2.93E-03 |
| cg21927363 | 9 | 15552206  | TSS1500                   | CCDC171    | -2.895±0.265 | -2.651±0.317 | 1.70E-04 |
| cg17887537 | 9 | 19049789  | GeneBody/1st exon         | RRAGA      | -4.68±0.305  | -4.977±0.481 | 2.45E-04 |
| cg13060646 | 9 | 19127573  | GeneBody/1st exon         | PLIN2      | -5.213±0.37  | -5.64±0.823  | 2.39E-04 |
| cg02942159 | 9 | 19379994  | GeneBody/1st intron       | RPS6       | -5.289±0.716 | -5.738±0.702 | 6.13E-03 |
| cg16925486 | 9 | 19380496  | TSS1500                   | RPS6       | -4.766±0.465 | -5.132±0.544 | 1.03E-03 |
| cg12348970 | 9 | 19786543  | GeneBody/1st exon         | SLC24A2    | 2.216±1.057  | 1.506±1.158  | 4.24E-03 |
| cg18264687 | 9 | 20622357  | GeneBody/5'UTR/1st exon   | MLLT3      | -3.447±0.677 | -3.99±0.768  | 7.85E-04 |
| cg23426587 | 9 | 21335126  | GeneBody/5'UTR/1st exon   | KLHL9      | -4.538±0.234 | -4.872±0.374 | 3.83E-07 |
| cg26673943 | 9 | 21994965  | GeneBody/1st exon         | CDKN2B-AS1 | -4.229±0.652 | -4.612±0.595 | 9.32E-03 |
| cg00718440 | 9 | 21995312  | GeneBody/1st intron       | CDKN2B-AS1 | -4.471±0.635 | -4.843±0.484 | 7.63E-03 |
| cg01716061 | 9 | 22009518  | TSS1500                   | CDKN2B     | -3.073±0.265 | -3.28±0.357  | 1.71E-03 |
| cg23074747 | 9 | 27573817  | GeneBody/5'UTR/1st exon   | C9orf72    | -6.104±0.593 | -6.609±0.558 | 2.47E-04 |
| cg18178963 | 9 | 32573171  | GeneBody/5'UTR/1st exon   | NDUF86     | -5.737±0.558 | -6.077±0.58  | 8.63E-03 |
| cg19432894 | 9 | 33025349  | GeneBody/5'UTR/1st exon   | DNAJA1     | -5.37±0.432  | -5.751±0.575 | 4.16E-04 |
| cg20999934 | 9 | 33290511  | GeneBody/5'UTR/1st exon   | NFX1       | -4.268±0.217 | -4.512±0.343 | 2.87E-05 |
| cg03863549 | 9 | 33474004  | TSS200                    | NOL6       | -4.613±0.393 | -4.892±0.385 | 2.06E-03 |
| cg19367388 | 9 | 33816707  | TSS1500                   | UBE2R2     | -5.235±0.452 | -5.543±0.434 | 2.95E-03 |
| cg08351143 | 9 | 33817857  | GeneBody/1st exon         | UBE2R2     | -5.027±0.372 | -5.463±0.501 | 6.11E-06 |
| cg22658985 | 9 | 34126662  | GeneBody/5'UTR/1st exon   | DCAF12     | -4.888±0.394 | -5.233±0.392 | 1.95E-04 |
| cg18676764 | 9 | 34127499  | TSS1500                   | DCAF12     | 3.546±0.23   | 3.779±0.326  | 8.10E-05 |
| cg14167017 | 9 | 34178925  | TSS200                    | UBAP1      | -4.858±0.288 | -5.041±0.316 | 6.84E-03 |
| cg19398446 | 9 | 34329521  | GeneBody/5'UTR/1st exon   | NUDT2      | -5.106±0.416 | -5.439±0.518 | 1.02E-03 |
| cg10049968 | 9 | 34458533  | GeneBody/5'UTR/1st exon   | FAM219A    | -4.744±0.276 | -4.96±0.38   | 1.76E-03 |
| cg07557424 | 9 | 34613043  | TSS1500                   | RPP25L     | -3.776±0.387 | -4.068±0.442 | 1.56E-03 |
| cg22579849 | 9 | 34620091  | GeneBody/1st intron       | DCTN3      | -4.359±0.426 | -4.72±0.608  | 8.71E-04 |
| cg06418184 | 9 | 34620572  | TSS200                    | DCTN3      | -3.991±0.392 | -4.309±0.527 | 1.12E-03 |
| cg26315493 | 9 | 35071724  | GeneBody/1st intron       | VCP        | -4.09±0.542  | -4.583±0.722 | 2.81E-04 |
| cg03563403 | 9 | 35079882  | GeneBody/5'UTR/1st exon   | FANCG      | -6.028±0.615 | -6.411±0.585 | 6.35E-03 |
| cg23378495 | 9 | 35096265  | GeneBody/5'UTR/1st exon   | PIGO       | -4.518±0.337 | -4.758±0.545 | 7.41E-03 |
| cg04273556 | 9 | 35096672  | TSS200                    | PIGO       | -2.392±0.157 | -2.503±0.238 | 6.48E-03 |
| cg01253107 | 9 | 35102903  | GeneBody/1st intron       | STOML2     | -4.61±0.492  | -4.934±0.571 | 5.70E-03 |
| cg03367667 | 9 | 35103545  | TSS1500                   | STOML2     | -5.658±0.361 | -5.899±0.355 | 3.66E-03 |
| cg19026306 | 9 | 35116525  | TSS1500                   | FAM214B    | -4.887±0.407 | -5.16±0.531  | 6.50E-03 |
| cg06216677 | 9 | 35603842  | TSS1500                   | TESK1      | -4.916±0.447 | -5.539±0.585 | 2.18E-07 |
| cg20610181 | 9 | 35674000  | GeneBody/1st exon         | CA9        | 1.002±0.574  | 0.543±0.723  | 1.10E-03 |
| cg00833393 | 9 | 35731638  | TSS1500                   | CREB3      | -4.632±0.367 | -4.882±0.396 | 3.65E-03 |
| cg05219900 | 9 | 35732569  | TSS200                    | TLN1       | -4.783±0.394 | -5.062±0.478 | 3.28E-03 |
| cg26471445 | 9 | 35749414  | GeneBody/5'UTR/1st intron | RGP1       | -5.361±0.503 | -5.694±0.514 | 4.18E-03 |
| cg04109220 | 9 | 35812293  | TSS200                    | SPAG8      | -4.777±0.618 | -5.248±0.788 | 1.89E-03 |
| cg27490193 | 9 | 35815239  | TSS200                    | HINT2      | -4.858±0.422 | -5.182±0.538 | 1.74E-03 |
| cg05412136 | 9 | 36191352  | GeneBody/1st intron       | CLTA       | -4.213±0.38  | -4.495±0.53  | 3.14E-03 |
| cg06087537 | 9 | 36401074  | GeneBody/5'UTR/1st intron | RNF38      | -4.411±0.382 | -4.792±0.605 | 1.87E-04 |
| cg13098382 | 9 | 36401460  | TSS1500                   | RNF38      | -4.519±0.292 | -4.843±0.404 | 1.75E-05 |
| cg01288067 | 9 | 36572645  | TSS1500                   | MELK       | -4.349±0.403 | -4.78±0.502  | 2.05E-05 |
| cg22753607 | 9 | 37120306  | TSS200                    | ZCCHC7     | -3.623±0.257 | -3.876±0.338 | 8.88E-05 |
| cg27538954 | 9 | 37120902  | GeneBody/5'UTR/1st intron | ZCCHC7     | -5.161±0.375 | -5.788±0.719 | 5.91E-08 |
| cg10289190 | 9 | 37422575  | TSS200                    | GRHPR      | -4.988±0.396 | -5.304±0.39  | 5.95E-04 |
| cg26850145 | 9 | 37465023  | GeneBody/5'UTR/1st intron | ZBTB5      | -5.288±0.468 | -5.616±0.504 | 2.80E-03 |
| cg04094160 | 9 | 37465712  | TSS1500                   | ZBTB5      | -4.564±0.337 | -4.819±0.361 | 1.32E-03 |
| cg26233529 | 9 | 37801319  | GeneBody/1st exon         | DCAF10     | -5.153±0.348 | -5.573±0.552 | 9.08E-06 |
| cg22498840 | 9 | 37903528  | GeneBody/1st intron       | SLC25A51   | -4.601±0.302 | -4.814±0.379 | 3.69E-03 |
| cg03738959 | 9 | 37904295  | GeneBody/5'UTR/1st exon   | SLC25A51   | -5.317±0.486 | -5.634±0.479 | 4.51E-03 |
| cg05174079 | 9 | 67786742  | TSS200                    | FAM27E3    | 2.107±0.318  | 1.877±0.376  | 2.54E-03 |
| cg21185421 | 9 | 71394810  | TSS200                    | FAM122A    | -6.319±0.575 | -6.686±0.51  | 4.67E-03 |
| cg11274211 | 9 | 71395330  | GeneBody/1st exon         | FAM122A    | -4.525±0.331 | -4.881±0.407 | 1.85E-05 |

|            |   |           |                           |            |              |              |          |
|------------|---|-----------|---------------------------|------------|--------------|--------------|----------|
| cg15623573 | 9 | 72288098  | TSS1500                   | APBA1      | -3.825±0.259 | -4.067±0.39  | 3.33E-04 |
| cg21740204 | 9 | 72873544  | GeneBody/1st exon         | SMC5-AS1   | -5.036±0.568 | -5.517±0.611 | 3.58E-04 |
| cg14667033 | 9 | 74384303  | TSS1500                   | TMEM2      | -4.489±0.411 | -4.744±0.398 | 6.50E-03 |
| cg23788167 | 9 | 74979561  | TSS200                    | ZFAND5     | -4.355±0.446 | -4.793±0.701 | 2.22E-04 |
| cg19684883 | 9 | 74980740  | TSS1500                   | ZFAND5     | -5.466±0.476 | -5.768±0.455 | 5.55E-03 |
| cg25287375 | 9 | 77703619  | GeneBody/1st exon         | OSTF1      | -5.01±0.483  | -5.396±0.568 | 8.89E-04 |
| cg16904306 | 9 | 78506294  | GeneBody/1st intron       | PCSK5      | -4.477±0.507 | -4.848±0.622 | 2.45E-03 |
| cg13066542 | 9 | 79009738  | TSS1500                   | RFK        | -5.064±0.264 | -5.442±0.558 | 4.60E-06 |
| cg25418831 | 9 | 79792647  | GeneBody/1st exon         | VPS13A-AS1 | -5.083±0.388 | -5.383±0.552 | 2.34E-03 |
| cg25336579 | 9 | 80912260  | GeneBody/1st intron       | PSAT1      | -5.712±1.138 | -6.404±0.616 | 4.56E-03 |
| cg19523029 | 9 | 82186884  | GeneBody/5'UTR/1st exon   | TLE4       | -3.706±0.541 | -4.061±0.602 | 5.32E-03 |
| cg16558348 | 9 | 86322296  | GeneBody/1st intron       | UBQLN1     | -5.445±0.502 | -5.834±0.565 | 1.12E-03 |
| cg00426963 | 9 | 86535755  | GeneBody/5'UTR/1st intron | KIF27      | -4.645±0.648 | -5.205±0.616 | 2.15E-04 |
| cg01809579 | 9 | 86595452  | GeneBody/5'UTR/1st exon   | HNRNP      | -4.473±0.325 | -4.844±0.53  | 2.78E-05 |
| cg06138027 | 9 | 86596281  | GeneBody/5'UTR/1st intron | RM1        | -4.389±0.441 | -4.69±0.591  | 5.96E-03 |
| cg20263942 | 9 | 88714961  | GeneBody/5'UTR/1st exon   | GOLM1      | -3.294±0.549 | -2.759±0.652 | 7.20E-05 |
| cg14060836 | 9 | 88897456  | GeneBody/5'UTR/1st exon   | ISCA1      | -5.681±0.487 | -6.354±0.717 | 4.22E-07 |
| cg03221676 | 9 | 88969266  | GeneBody/5'UTR/1st exon   | ZCCHC6     | -5.097±0.276 | -5.416±0.514 | 5.61E-05 |
| cg14230685 | 9 | 91004214  | GeneBody/5'UTR/1st intron | SPIN1      | -4.253±0.401 | -4.633±0.63  | 3.39E-04 |
| cg05465755 | 9 | 91926196  | GeneBody/5'UTR/1st exon   | CKS2       | -6.005±0.538 | -6.353±0.573 | 5.49E-03 |
| cg04095468 | 9 | 91933906  | GeneBody/1st intron       | SECISBP2   | -3.346±0.499 | -3.705±0.658 | 3.53E-03 |
| cg20070077 | 9 | 92219995  | GeneBody/5'UTR/1st exon   | GADD45G    | -5.501±0.615 | -5.905±0.712 | 5.68E-03 |
| cg02608019 | 9 | 93564028  | GeneBody/5'UTR/1st exon   | SYK        | -3.831±0.764 | -4.322±0.61  | 3.80E-03 |
| cg10708828 | 9 | 94185698  | GeneBody/5'UTR/1st intron | NFIL3      | -5.053±0.387 | -5.295±0.368 | 6.00E-03 |
| cg15919045 | 9 | 94186882  | TSS1500                   | NFIL3      | -5.891±0.382 | -6.222±0.56  | 7.56E-04 |
| cg21624883 | 9 | 95432804  | TSS1500                   | IPPK       | -4.735±0.394 | -5.165±0.493 | 1.58E-05 |
| cg05969697 | 9 | 95527975  | TSS1500                   | BICD2      | -4.648±0.335 | -4.909±0.543 | 3.43E-03 |
| cg21925493 | 9 | 95858671  | GeneBody/1st intron       | C9orf89    | -4.749±0.529 | -5.108±0.609 | 4.24E-03 |
| cg10072995 | 9 | 95895956  | GeneBody/1st intron       | NINJ1      | -4.61±0.426  | -5.047±0.584 | 5.77E-05 |
| cg09600829 | 9 | 96216052  | TSS200                    | FAM120AOS  | -4.3±0.406   | -4.566±0.445 | 5.30E-03 |
| cg20684399 | 9 | 96338308  | TSS1500                   | PHF2       | -4.202±0.295 | -4.613±0.357 | 1.51E-07 |
| cg25910443 | 9 | 97488953  | GeneBody/5'UTR/1st exon   | C9orf3     | -5.184±0.382 | -5.743±0.715 | 8.25E-07 |
| cg06202984 | 9 | 98079903  | GeneBody/5'UTR/1st exon   | FANCC      | -4.021±0.352 | -4.466±0.52  | 2.39E-06 |
| cg12043807 | 9 | 99180432  | GeneBody/5'UTR/1st exon   | ZNF367     | -5.027±0.332 | -5.273±0.555 | 5.98E-03 |
| cg19881177 | 9 | 99181234  | TSS1500                   | ZNF367     | -5.497±0.45  | -5.794±0.544 | 6.06E-03 |
| cg00429618 | 9 | 99962350  | 0                         | 0          | -2.379±0.4   | -2.702±0.388 | 5.00E-04 |
| cg16199381 | 9 | 100396477 | TSS1500                   | TSTD2      | -4.496±0.457 | -4.88±0.567  | 5.70E-04 |
| cg07965714 | 9 | 100459834 | TSS200                    | XPA        | -4.902±0.34  | -5.282±0.514 | 2.49E-05 |
| cg10421561 | 9 | 100745105 | TSS1500                   | ANP32B     | -4.632±0.424 | -5.081±0.547 | 2.78E-05 |
| cg25479216 | 9 | 100818684 | TSS1500                   | NANS       | -5.092±0.451 | -5.375±0.448 | 6.37E-03 |
| cg02827328 | 9 | 100881403 | GeneBody/1st exon         | TRIM14     | -5.702±0.518 | -6.098±0.635 | 1.62E-03 |
| cg21618439 | 9 | 100954694 | GeneBody/5'UTR/1st intron | CORO2A     | -5.116±0.338 | -5.414±0.44  | 3.78E-04 |
| cg01725199 | 9 | 101569990 | GeneBody/1st exon         | GALNT12    | -5.152±0.845 | -5.662±0.837 | 8.42E-03 |
| cg15492003 | 9 | 101984308 | TSS200                    | ALG2       | -5.717±0.489 | -6.162±0.572 | 1.79E-04 |
| cg25454755 | 9 | 102584145 | GeneBody/5'UTR/1st exon   | NR4A3      | -4.486±0.392 | -4.813±0.536 | 8.99E-04 |
| cg21606237 | 9 | 102668725 | GeneBody/1st intron       | LOC441461  | -4.078±0.272 | -4.36±0.416  | 8.83E-05 |
| cg08347423 | 9 | 102861153 | GeneBody/5'UTR/1st exon   | ERP4       | -5.384±0.549 | -5.779±0.651 | 2.71E-03 |
| cg23043438 | 9 | 103115132 | GeneBody/5'UTR/1st exon   | TEX10      | -5.889±0.599 | -6.325±0.586 | 1.58E-03 |
| cg19318511 | 9 | 103189158 | TSS1500                   | MSANTD3    | -4.318±0.538 | -4.764±0.605 | 5.29E-04 |
| cg15075170 | 9 | 103236030 | GeneBody/1st intron       | TMEFF1     | -4.046±0.357 | -4.3±0.533   | 5.78E-03 |
| cg02602411 | 9 | 104357177 | GeneBody/1st exon         | PPP3R2     | 1.545±0.404  | 1.231±0.66   | 3.57E-03 |
| cg15765694 | 9 | 104358101 | TSS1500                   | PPP3R2     | 0.805±0.485  | 0.483±0.718  | 9.64E-03 |
| cg21893220 | 9 | 106856376 | TSS200                    | SMC2       | -5.485±0.406 | -5.949±0.603 | 1.62E-05 |
| cg07328495 | 9 | 106856765 | TSS200                    | SMC2       | -4.337±0.479 | -4.745±0.67  | 7.48E-04 |
| cg20109151 | 9 | 107509821 | TSS200                    | NIPSNAP3A  | -5.194±0.344 | -5.609±0.5   | 5.67E-06 |
| cg24329374 | 9 | 107510068 | GeneBody/5'UTR/1st exon   | NIPSNAP3A  | -5.643±0.464 | -5.979±0.462 | 1.73E-03 |
| cg04725234 | 9 | 108456639 | TSS200                    | TMEM38B    | -4.386±0.305 | -4.62±0.484  | 3.65E-03 |
| cg14919562 | 9 | 110045901 | GeneBody/5'UTR/1st exon   | RAD23B     | -5.542±0.413 | -5.837±0.4   | 1.86E-03 |
| cg07281640 | 9 | 111695707 | GeneBody/5'UTR/1st intron | IKBKAP     | -4.821±0.37  | -5.222±0.512 | 2.66E-05 |
| cg12568776 | 9 | 112083456 | TSS1500                   | EPB41L4B   | -5.079±0.376 | -5.666±0.613 | 6.60E-08 |
| cg05120715 | 9 | 114659593 | GeneBody/1st exon         | UGCG       | -4.083±0.299 | -4.436±0.401 | 5.46E-06 |
| cg08313788 | 9 | 115095520 | TSS1500                   | PTBP3      | -5.196±0.434 | -5.5±0.641   | 6.28E-03 |
| cg04837322 | 9 | 115096481 | TSS1500                   | PTBP3      | -4.248±0.45  | -4.535±0.559 | 8.49E-03 |
| cg15865742 | 9 | 115984268 | GeneBody/5'UTR/1st intron | SLC31A1    | -2.453±0.367 | -2.063±0.497 | 3.27E-05 |
| cg11233228 | 9 | 116037401 | GeneBody/5'UTR/1st intron | CDC26      | -3.794±0.179 | -3.913±0.172 | 3.69E-03 |
| cg05375800 | 9 | 116102362 | GeneBody/5'UTR/1st intron | WDR31      | -4.255±0.204 | -4.498±0.339 | 1.63E-05 |
| cg00885506 | 9 | 116102792 | TSS200                    | WDR31      | -3.695±0.39  | -3.971±0.52  | 4.19E-03 |
| cg03984733 | 9 | 116139085 | TSS1500                   | HDHD3      | -5.062±0.368 | -5.403±0.456 | 1.72E-04 |
| cg23916845 | 9 | 117268172 | TSS1500                   | DFNB31     | -4.363±0.426 | -4.645±0.467 | 4.78E-03 |
| cg12377712 | 9 | 117349993 | GeneBody/5'UTR/1st exon   | ATP6V1G1   | -5.175±0.454 | -5.478±0.641 | 8.29E-03 |
| cg10791260 | 9 | 117568588 | TSS200                    | TNFSF15    | -3.633±0.656 | -4.043±0.452 | 4.29E-03 |
| cg02515422 | 9 | 120466493 | GeneBody/5'UTR/1st exon   | TLR4       | -3.838±0.579 | -4.284±0.64  | 1.12E-03 |
| cg12576700 | 9 | 123342680 | TSS1500                   | CDK5RAP2   | -4.779±0.45  | -5.283±0.658 | 2.07E-05 |
| cg25186211 | 9 | 124921565 | GeneBody/1st intron       | NDUFA8     | -3.925±0.281 | -4.271±0.356 | 1.92E-06 |
| cg00636639 | 9 | 125027249 | TSS200                    | RBM18      | -4.528±0.355 | -4.12±0.469  | 1.61E-04 |
| cg14598387 | 9 | 125289357 | GeneBody/1st exon         | OR1N1      | -0.698±0.481 | -1.068±0.811 | 4.54E-03 |
| cg16473288 | 9 | 125290120 | TSS1500                   | OR1N1      | 1.553±0.528  | 1.084±0.783  | 6.70E-04 |
| cg09768944 | 9 | 125590709 | GeneBody/5'UTR/1st intron | PDCL       | -3.867±0.234 | -4.12±0.469  | 2.65E-04 |
| cg01677177 | 9 | 125693677 | GeneBody/5'UTR/1st intron | ZBTB26     | -3.377±0.168 | -3.502±0.194 | 1.76E-03 |
| cg21489873 | 9 | 125877134 | GeneBody/1st exon         | MIR600HG   | 2.349±0.142  | 2.514±0.229  | 2.02E-05 |
| cg25902460 | 9 | 126030596 | GeneBody/1st intron       | STRBP      | -3.557±0.367 | -3.191±0.555 | 1.47E-04 |
| cg15806518 | 9 | 127177817 | TSS200                    | PSMB7      | -4.284±0.624 | -4.68±0.608  | 5.64E-03 |
| cg08173535 | 9 | 127533861 | TSS1500                   | NR6A1      | -3.64±0.222  | -3.824±0.454 | 5.52E-03 |
| cg12788471 | 9 | 127630977 | TSS1500                   | ARPC5L     | -5.664±0.375 | -5.941±0.567 | 4.37E-03 |
| cg11797883 | 9 | 127631644 | GeneBody/1st exon         | ARPC5L     | -5.259±0.482 | -5.64±0.719  | 2.13E-03 |
| cg03801144 | 9 | 127951957 | GeneBody/1st exon         | PPP6C      | -5.017±0.297 | -5.214±0.306 | 4.22E-03 |
| cg09155852 | 9 | 128469764 | TSS1500                   | MAPKAP1    | -3.896±0.387 | -4.178±0.476 | 2.60E-03 |
| cg18360149 | 9 | 130186444 | TSS1500                   | ZNF79      | -5.198±0.363 | -5.439±0.438 | 5.76E-03 |
| cg10188131 | 9 | 130214136 | GeneBody/5'UTR/1st exon   | LRSAM1     | -5.194±0.523 | -5.54±0.564  | 4.72E-03 |
| cg21753834 | 9 | 130477671 | GeneBody/1st intron       | PTRH1      | -4.67±0.362  | -4.959±0.509 | 1.57E-03 |
| cg24121001 | 9 | 130478378 | GeneBody/5'UTR/1st exon   | TTC16      | -2.399±0.329 | -2.067±0.363 | 3.41E-05 |
| cg11973688 | 9 | 130564956 | TSS200                    | FPGS       | -5.4±0.34    | -5.633±0.372 | 3.56E-03 |
| cg07295092 | 9 | 130565376 | TSS200                    | FPGS       | -4.989±0.47  | -5.285±0.535 | 7.74E-03 |
| cg09092161 | 9 | 130639739 | GeneBody/5'UTR/1st intron | AK1        | -4.818±0.64  | -5.265±0.64  | 2.45E-03 |
| cg09665592 | 9 | 130699885 | GeneBody/1st intron       | DPM2       | -4.534±0.293 | -4.786±0.42  | 7.64E-04 |

|            |    |           |                           |           |              |              |          |
|------------|----|-----------|---------------------------|-----------|--------------|--------------|----------|
| cg09729918 | 9  | 130830948 | GeneBody/1st intron       | SLC25A25  | -4.925±0.416 | -5.189±0.362 | 4.81E-03 |
| cg19857538 | 9  | 131085530 | GeneBody                  | COQ4      | -4.365±0.255 | -4.646±0.361 | 2.15E-05 |
| cg12076344 | 9  | 131102607 | TSS1500                   | SLC27A4   | -5.225±0.606 | -5.746±0.722 | 3.90E-04 |
| cg14139633 | 9  | 131103210 | GeneBody/5'UTR/1st intron | SLC27A4   | -5.393±0.399 | -5.737±0.555 | 6.52E-04 |
| cg27627570 | 9  | 131183239 | GeneBody/1st exon         | CERCAM    | -5.607±0.544 | -6.051±0.783 | 1.37E-03 |
| cg11007123 | 9  | 131314542 | TSS1500                   | SPTAN1    | -4.82±0.605  | -5.245±0.588 | 2.20E-03 |
| cg03243895 | 9  | 131314908 | GeneBody/5'UTR/1st exon   | SPTAN1    | -5.432±0.462 | -5.844±0.579 | 3.43E-04 |
| cg18773223 | 9  | 131549619 | GeneBody/5'UTR/1st exon   | TBC1D13   | -3.922±0.266 | -4.185±0.319 | 5.94E-05 |
| cg00228799 | 9  | 131580591 | TSS200                    | ENDOG     | -4.736±0.563 | -5.137±0.556 | 2.01E-03 |
| cg00475955 | 9  | 131592049 | GeneBody/1st exon         | C9orf114  | -5.377±0.574 | -5.966±0.769 | 5.19E-05 |
| cg13752043 | 9  | 131644109 | GeneBody/5'UTR/1st intron | CCBL1     | -4.271±0.283 | -4.566±0.46  | 1.10E-04 |
| cg16898150 | 9  | 131644556 | GeneBody/5'UTR/1st intron | LRRC8A    | -5.991±0.521 | -6.521±0.584 | 3.15E-05 |
| cg06318164 | 9  | 131710719 | TSS1500                   | DOLK      | -3.939±0.468 | -4.246±0.547 | 5.99E-03 |
| cg09431062 | 9  | 131790499 | GeneBody/5'UTR/1st exon   | SH3GLB2   | -5.419±0.345 | -5.986±0.639 | 5.84E-08 |
| cg00729541 | 9  | 131798577 | TSS1500                   | FAM73B    | -4.269±0.297 | -4.538±0.423 | 3.97E-04 |
| cg26805528 | 9  | 131872542 | GeneBody/1st intron       | CRAT      | -1.493±0.27  | -1.686±0.224 | 1.50E-03 |
| cg18197998 | 9  | 131873514 | TSS200                    | PPP2R4    | -4.122±0.202 | -4.273±0.245 | 1.86E-03 |
| cg15852879 | 9  | 132404411 | GeneBody/5'UTR/1st exon   | ASB6      | -4.864±0.408 | -5.244±0.667 | 5.25E-04 |
| cg21060854 | 9  | 132565518 | GeneBody/1st exon         | TOR1B     | -5.78±0.569  | -6.378±0.657 | 2.09E-05 |
| cg23282771 | 9  | 133320279 | GeneBody/5'UTR/1st exon   | ASS1      | -4.196±0.331 | -4.412±0.471 | 9.91E-03 |
| cg12085225 | 9  | 135230256 | GeneBody/5'UTR/1st intron | SETX      | -5.568±0.573 | -6.256±0.722 | 2.90E-06 |
| cg13134662 | 9  | 136858680 | TSS1500                   | VAV2      | -3.612±0.334 | -3.879±0.336 | 6.19E-04 |
| cg04648440 | 9  | 136932424 | GeneBody/5'UTR/1st intron | BRD3      | -3.114±0.208 | -2.936±0.292 | 7.13E-04 |
| cg03243700 | 9  | 137000940 | TSS1500                   | WDR5      | -5.576±0.625 | -6.262±0.724 | 1.05E-05 |
| cg10604703 | 9  | 137001737 | GeneBody/5'UTR/1st intron | WDR5      | -3.312±0.452 | -3.64±0.691  | 5.28E-03 |
| cg16408394 | 9  | 137219075 | GeneBody/1st intron       | RXRA      | -4.545±0.361 | -4.871±0.442 | 2.29E-04 |
| cg15769409 | 9  | 138372274 | GeneBody/5'UTR/1st intron | PPP1R26   | -3.926±0.2   | -4.146±0.323 | 4.93E-05 |
| cg22587514 | 9  | 138392051 | TSS1500                   | C9orf116  | -4.926±0.319 | -5.421±0.532 | 8.56E-08 |
| cg23815000 | 9  | 138413012 | TSS1500                   | LCN1      | 1.437±0.744  | 0.956±0.88   | 6.75E-03 |
| cg15229026 | 9  | 138853493 | TSS1500                   | UBAC1     | -3.634±0.396 | -4.139±0.584 | 2.13E-06 |
| cg20776317 | 9  | 139292793 | GeneBody/1st exon         | SNAPC4    | 2.67±0.307   | 2.92±0.499   | 2.31E-03 |
| cg08367703 | 9  | 139304491 | GeneBody/1st intron       | SDCCAG3   | -5.369±0.333 | -5.654±0.608 | 2.31E-03 |
| cg21559783 | 9  | 139378129 | GeneBody/5'UTR/1st exon   | SEC16A    | -4.098±0.283 | -4.457±0.394 | 1.75E-06 |
| cg06654447 | 9  | 139686019 | GeneBody/1st intron       | TMEM141   | -4.73±0.287  | -4.993±0.403 | 3.29E-04 |
| cg17963089 | 9  | 139743185 | TSS200                    | PHPT1     | -4.271±0.336 | -4.672±0.52  | 9.72E-06 |
| cg13970341 | 9  | 139923093 | GeneBody/1st intron       | ABCA2     | -4.252±0.291 | -4.468±0.266 | 1.13E-03 |
| cg15428653 | 9  | 139923402 | TSS200                    | ABCA2     | -3.375±0.281 | -3.162±0.372 | 2.26E-03 |
| cg15733507 | 9  | 139965275 | TSS1500                   | SAPCD2    | -4.855±0.492 | -5.316±0.551 | 1.06E-04 |
| cg03261004 | 9  | 139981660 | GeneBody/1st exon         | MAN1B1    | -5.194±0.351 | -5.534±0.457 | 1.10E-04 |
| cg22419075 | 9  | 140008995 | GeneBody                  | DPP7      | -5.198±0.545 | -5.597±0.659 | 2.38E-03 |
| cg07172280 | 9  | 140009455 | TSS1500                   | DPP7      | -4.94±0.356  | -5.186±0.381 | 3.19E-03 |
| cg10467681 | 9  | 140083784 | TSS1500                   | ANAPC2    | -4.452±0.32  | -4.721±0.504 | 1.38E-03 |
| cg06886022 | 9  | 140095555 | TSS1500                   | TPRN      | -4.331±0.386 | -4.015±0.384 | 4.56E-04 |
| cg22719586 | 9  | 140099722 | GeneBody/1st exon         | TMEM203   | -5.142±0.387 | -5.543±0.513 | 4.39E-05 |
| cg03168296 | 9  | 140317011 | GeneBody/5'UTR/1st intron | EXD3      | -4.2±0.23    | -4.456±0.376 | 4.39E-05 |
| cg07772309 | 9  | 140353475 | GeneBody/1st intron       | NSMF      | -5.979±0.44  | -6.439±0.736 | 1.27E-04 |
| cg02813021 | 10 | 180599    | GeneBody/5'UTR/1st exon   | ZMYND11   | -5.367±0.437 | -5.814±0.477 | 2.76E-05 |
| cg08907850 | 10 | 1094976   | GeneBody/5'UTR/1st exon   | ID1       | -5.104±0.31  | -5.497±0.49  | 3.61E-06 |
| cg08020381 | 10 | 1095554   | TSS1500                   | ID1       | -4.948±0.479 | -5.295±0.497 | 1.91E-03 |
| cg27274028 | 10 | 1102313   | TSS1500                   | WDR37     | -5.394±0.485 | -5.909±0.462 | 1.12E-05 |
| cg10247268 | 10 | 3109799   | GeneBody/1st exon         | PFKP      | -4.788±0.725 | -5.284±0.528 | 1.95E-03 |
| cg26644395 | 10 | 5407020   | GeneBody/5'UTR/1st exon   | UCN3      | 0.002±0.776  | -0.534±0.87  | 3.45E-03 |
| cg25171089 | 10 | 5708825   | TSS1500                   | ASB13     | -5.187±0.49  | -5.819±0.713 | 1.59E-06 |
| cg03157149 | 10 | 5855170   | GeneBody/1st intron       | GDI2      | -6.062±0.484 | -6.612±0.604 | 7.54E-06 |
| cg08827391 | 10 | 5855992   | TSS1500                   | GDI2      | -5.306±0.602 | -5.695±0.632 | 5.33E-03 |
| cg17560720 | 10 | 5932700   | GeneBody/5'UTR/1st intron | FBXO18    | -4.704±0.494 | -5.074±0.488 | 1.22E-03 |
| cg08497766 | 10 | 6019877   | GeneBody/5'UTR/1st exon   | IL15RA    | -3.938±0.4   | -4.231±0.382 | 1.42E-03 |
| cg02863237 | 10 | 6131472   | GeneBody/5'UTR/1st exon   | RBM17     | -5.297±0.326 | -5.701±0.402 | 1.64E-06 |
| cg21542094 | 10 | 6243955   | TSS1500                   | PFKFB3    | -4.433±0.616 | -5.472±0.636 | 5.67E-03 |
| cg14222233 | 10 | 6245271   | GeneBody/1st exon         | PFKFB3    | -5.232±0.377 | -5.488±0.468 | 5.10E-03 |
| cg02962299 | 10 | 7829899   | GeneBody/1st exon         | KIN       | -6.291±0.554 | -6.69±0.556  | 1.85E-03 |
| cg20716064 | 10 | 11652950  | GeneBody/5'UTR/1st intron | USP6NL    | -5.142±0.399 | -5.472±0.524 | 8.36E-04 |
| cg04745698 | 10 | 12084977  | TSS200                    | UPF2      | -5.765±0.51  | -6.091±0.487 | 5.13E-03 |
| cg15563952 | 10 | 12110679  | TSS1500                   | DHTKD1    | -4.065±0.544 | -4.421±0.651 | 6.33E-03 |
| cg14461963 | 10 | 12111049  | GeneBody/1st exon         | DHTKD1    | -4.343±0.255 | -4.568±0.351 | 4.76E-04 |
| cg13430851 | 10 | 12237037  | TSS1500                   | CDC123    | -3.063±0.568 | -3.432±0.532 | 4.35E-03 |
| cg13864877 | 10 | 13142132  | GeneBody/5'UTR/1st exon   | OPTN      | -5.05±0.341  | -5.27±0.369  | 5.86E-03 |
| cg11115427 | 10 | 13342610  | TSS1500                   | PHYH      | -2.192±0.477 | -2.486±0.559 | 9.62E-03 |
| cg00766889 | 10 | 13390384  | TSS200                    | SEPHS1    | -4.75±0.274  | -4.916±0.291 | 9.26E-03 |
| cg17854497 | 10 | 13390774  | TSS1500                   | SEPHS1    | -3.339±0.576 | -3.72±0.664  | 5.40E-03 |
| cg26778908 | 10 | 13629255  | GeneBody/1st intron       | PRPF18    | -3.936±0.227 | -4.136±0.366 | 9.16E-04 |
| cg10957200 | 10 | 14880574  | GeneBody/1st intron       | HSPA14    | -4.86±0.472  | -5.408±0.694 | 1.13E-05 |
| cg04785461 | 10 | 14996236  | TSS200                    | DCLRE1C   | -5.142±0.353 | -5.486±0.626 | 4.47E-04 |
| cg13417824 | 10 | 15139785  | TSS1500                   | C10orf111 | -5.102±0.363 | -5.458±0.613 | 3.24E-04 |
| cg05499853 | 10 | 15902324  | GeneBody/5'UTR/1st exon   | FAM188A   | -5.034±1.04  | -5.753±0.741 | 1.72E-03 |
| cg15875120 | 10 | 15902605  | TSS200                    | FAM188A   | -4.274±0.703 | -4.778±0.524 | 1.25E-03 |
| cg11175310 | 10 | 16859107  | GeneBody/5'UTR/1st intron | RSU1      | -3.947±0.41  | -4.262±0.569 | 2.22E-03 |
| cg18418503 | 10 | 17686274  | GeneBody/1st exon         | STAM      | -4.841±0.327 | -5.142±0.433 | 2.39E-04 |
| cg26550234 | 10 | 18239793  | TSS1500                   | SLC39A12  | 1.832±0.589  | 1.069±0.982  | 3.53E-06 |
| cg19856444 | 10 | 18241116  | GeneBody/5'UTR/1st intron | SLC39A12  | 0.428±0.57   | -0.014±0.709 | 1.64E-03 |
| cg08400019 | 10 | 18940404  | GeneBody/5'UTR/1st exon   | NSUN6     | -4.071±0.329 | -4.34±0.493  | 1.56E-03 |
| cg10601939 | 10 | 18948058  | TSS1500                   | ARL5B     | -5.213±0.419 | -5.732±0.559 | 2.17E-06 |
| cg23820285 | 10 | 23003250  | GeneBody/1st exon         | PIP4K2A   | -5.872±0.405 | -6.375±0.554 | 2.31E-06 |
| cg24995798 | 10 | 25305002  | GeneBody/5'UTR/1st exon   | ENKUR     | -4.157±0.396 | -4.475±0.439 | 7.03E-04 |
| cg08847038 | 10 | 25305217  | TSS200                    | ENKUR     | -4.084±0.539 | -4.461±0.44  | 1.76E-03 |
| cg23087130 | 10 | 27149668  | GeneBody/1st intron       | ABI1      | -4.786±0.566 | -5.185±0.542 | 2.11E-03 |
| cg17918201 | 10 | 27150106  | TSS200                    | ABI1      | -5.221±0.448 | -5.512±0.426 | 4.42E-03 |
| cg17165760 | 10 | 27389408  | GeneBody/5'UTR/1st exon   | ANKRD26   | -4.909±0.641 | -5.412±0.827 | 1.42E-03 |
| cg04865575 | 10 | 27443031  | GeneBody/1st intron       | YME1L1    | -5.552±0.516 | -6.008±0.436 | 1.30E-04 |
| cg03554914 | 10 | 27444905  | GeneBody/1st intron       | MASTL     | -4.559±0.514 | -5.082±0.74  | 8.42E-05 |
| cg06898923 | 10 | 27792905  | TSS200                    | RAB18     | -3.896±0.375 | -4.158±0.406 | 2.85E-03 |
| cg03259469 | 10 | 30025293  | TSS1500                   | SVIL      | -3.75±0.341  | -3.983±0.358 | 2.03E-03 |
| cg03807314 | 10 | 30722678  | TSS1500                   | MAP3K8    | -4.492±0.283 | -4.811±0.591 | 2.03E-04 |
| cg01819863 | 10 | 32635814  | GeneBody/5'UTR/1st intron | EPC1      | -6.113±0.605 | -6.678±0.749 | 1.54E-04 |
| cg21879981 | 10 | 32636639  | TSS1500                   | EPC1      | -4.599±0.601 | -5.079±0.581 | 5.65E-04 |

|            |    |          |                           |                   |              |              |          |
|------------|----|----------|---------------------------|-------------------|--------------|--------------|----------|
| cg12651014 | 10 | 32735292 | GeneBody/5'UTR/1st exon   | <i>CCDC7</i>      | -4.252±0.432 | -4.624±0.41  | 2.25E-04 |
| cg15799959 | 10 | 38146444 | GeneBody/5'UTR/1st exon   | <i>ZNF248</i>     | -4.663±0.483 | -5.08±0.469  | 2.23E-04 |
| cg03208093 | 10 | 38147096 | TSS200                    | <i>ZNF248</i>     | -5.2±0.485   | -5.573±0.405 | 6.83E-04 |
| cg24146166 | 10 | 38265215 | GeneBody/5'UTR/1st intron | <i>ZNF25</i>      | -4.302±0.434 | -4.84±0.55   | 1.75E-06 |
| cg03712239 | 10 | 38265764 | TSS1500                   | <i>ZNF25</i>      | -4.032±0.387 | -4.383±0.518 | 2.99E-04 |
| cg25924032 | 10 | 43278349 | GeneBody/5'UTR/1st intron | <i>BMS1</i>       | -4.749±0.957 | -5.352±0.654 | 3.91E-03 |
| cg17665608 | 10 | 43633793 | TSS200                    | <i>CSGALNACT2</i> | -4.387±0.403 | -4.801±0.503 | 3.99E-05 |
| cg18435900 | 10 | 44101962 | GeneBody/5'UTR/1st exon   | <i>ZNF485</i>     | -5.605±0.529 | -6.414±0.825 | 7.52E-08 |
| cg13603099 | 10 | 45454574 | GeneBody/1st intron       | <i>TMEM72-AS1</i> | -4.927±0.312 | -5.15±0.453  | 5.01E-03 |
| cg02702510 | 10 | 46090551 | TSS200                    | <i>43898</i>      | -3.235±0.402 | -3.604±0.716 | 9.50E-04 |
| cg22710329 | 10 | 46168446 | TSS200                    | <i>ZFAND4</i>     | -4.013±0.238 | -4.26±0.425  | 2.22E-04 |
| cg21115977 | 10 | 48416510 | GeneBody/1st exon         | <i>GDF2</i>       | 0.416±0.495  | 0.046±0.731  | 3.50E-03 |
| cg08427977 | 10 | 50323832 | TSS1500                   | <i>VSTM4</i>      | -0.706±0.475 | -1.03±0.509  | 3.57E-03 |
| cg14343062 | 10 | 50746568 | GeneBody/5'UTR/1st intron | <i>ERCC6</i>      | -4.798±0.335 | -5.135±0.551 | 1.97E-04 |
| cg20477318 | 10 | 51623047 | GeneBody/1st intron       | <i>TIMM23</i>     | -4.576±0.639 | -4.952±0.552 | 8.47E-03 |
| cg06717104 | 10 | 51623795 | TSS1500                   | <i>TIMM23</i>     | -6.096±0.613 | -6.614±0.743 | 5.11E-04 |
| cg12693634 | 10 | 52384065 | TSS1500                   | <i>SGMS1</i>      | -3.086±0.49  | -2.696±0.652 | 1.36E-03 |
| cg18690395 | 10 | 53459536 | TSS200                    | <i>CSTF2T</i>     | -5.66±0.602  | -6.035±0.664 | 8.02E-03 |
| cg12106959 | 10 | 58120759 | GeneBody/1st intron       | <i>ZWINT</i>      | -4.172±0.358 | -4.485±0.39  | 2.42E-04 |
| cg18534872 | 10 | 58121066 | TSS200                    | <i>ZWINT</i>      | -4.736±0.349 | -5.011±0.348 | 7.26E-04 |
| cg24573310 | 10 | 60029455 | GeneBody/1st intron       | <i>CISD1</i>      | -5.097±0.492 | -5.491±0.614 | 1.02E-03 |
| cg06532493 | 10 | 60029458 | GeneBody/1st intron       | <i>CISD1</i>      | -4.616±0.368 | -4.871±0.439 | 3.80E-03 |
| cg24631950 | 10 | 60094625 | TSS200                    | <i>UBE2D1</i>     | -4.21±0.26   | -4.442±0.431 | 9.40E-04 |
| cg15984822 | 10 | 61665988 | GeneBody/1st exon         | <i>CCDC6</i>      | -2.645±0.386 | -2.92±0.278  | 1.27E-03 |
| cg25153340 | 10 | 64029004 | TSS1500                   | <i>RTKN2</i>      | -4.228±0.274 | -4.547±0.431 | 1.55E-05 |
| cg23680936 | 10 | 64564801 | GeneBody/5'UTR/1st exon   | <i>ADO</i>        | -5.34±0.284  | -5.539±0.407 | 5.66E-03 |
| cg21264207 | 10 | 64576130 | TSS200                    | <i>EGR2</i>       | -4.665±0.318 | -5.012±0.432 | 2.13E-05 |
| cg03251249 | 10 | 69645012 | GeneBody/5'UTR/1st exon   | <i>SIRT1</i>      | -5.114±0.398 | -5.429±0.471 | 1.01E-03 |
| cg06134936 | 10 | 69834491 | GeneBody/5'UTR/1st intron | <i>HERC4</i>      | -4.647±0.396 | -4.889±0.373 | 7.06E-03 |
| cg03652343 | 10 | 69835287 | TSS200                    | <i>HERC4</i>      | -4.561±0.586 | -4.955±0.65  | 4.34E-03 |
| cg00873937 | 10 | 69991564 | GeneBody/5'UTR/1st exon   | <i>ATOH7</i>      | -4.092±0.308 | -4.365±0.377 | 2.97E-04 |
| cg14191109 | 10 | 70287438 | TSS200                    | <i>SLC25A16</i>   | -3.852±0.722 | -4.294±0.655 | 6.64E-03 |
| cg05111829 | 10 | 70940483 | GeneBody/1st intron       | <i>SUPV3L1</i>    | -5.063±0.3   | -5.36±0.577  | 6.08E-04 |
| cg23620639 | 10 | 71561211 | TSS1500                   | <i>COL13A1</i>    | -3.581±0.516 | -3.899±0.49  | 6.86E-03 |
| cg12635664 | 10 | 71930586 | TSS1500                   | <i>SAR1A</i>      | -4.29±0.372  | -4.561±0.451 | 2.59E-03 |
| cg11880892 | 10 | 71992660 | GeneBody/1st intron       | <i>PPA1</i>       | -4.226±0.37  | -4.457±0.425 | 8.38E-03 |
| cg15097876 | 10 | 71993604 | TSS1500                   | <i>PPA1</i>       | -4.865±0.302 | -5.362±0.469 | 1.28E-08 |
| cg26869604 | 10 | 72142636 | TSS1500                   | <i>LRRC20</i>     | -4.701±0.243 | -4.956±0.301 | 2.81E-05 |
| cg01478450 | 10 | 73079349 | GeneBody/1st intron       | <i>SLC29A3</i>    | -4.23±0.277  | -4.549±0.394 | 1.09E-05 |
| cg24883276 | 10 | 73611008 | GeneBody/5'UTR/1st exon   | <i>PSAP</i>       | -5.933±0.44  | -6.28±0.47   | 7.47E-04 |
| cg14767877 | 10 | 73611073 | GeneBody/5'UTR/1st exon   | <i>PSAP</i>       | -5.793±0.639 | -6.214±0.538 | 3.28E-03 |
| cg03761560 | 10 | 74114860 | GeneBody/5'UTR/1st exon   | <i>DNAJB12</i>    | -5.122±0.336 | -5.535±0.521 | 5.91E-06 |
| cg11655691 | 10 | 74385779 | GeneBody/5'UTR/1st exon   | <i>MICU1</i>      | -4.076±0.45  | -4.379±0.672 | 8.81E-03 |
| cg03373080 | 10 | 74452380 | GeneBody/5'UTR/1st exon   | <i>MCU</i>        | -4.355±0.265 | -4.605±0.39  | 2.75E-04 |
| cg20910436 | 10 | 74856386 | GeneBody/5'UTR/1st intron | <i>P4HA1</i>      | -3.775±0.212 | -4.062±0.317 | 7.46E-07 |
| cg21416602 | 10 | 74927745 | GeneBody/5'UTR/1st exon   | <i>ECD</i>        | -5.169±0.302 | -5.57±0.478  | 1.56E-06 |
| cg07061913 | 10 | 75006462 | GeneBody                  | <i>DNAJC9</i>     | -4.811±0.444 | -5.127±0.42  | 1.87E-03 |
| cg20441175 | 10 | 75007251 | GeneBody/1st intron       | <i>DNAJC9-AS1</i> | -4.811±0.419 | -5.078±0.53  | 8.85E-03 |
| cg04733302 | 10 | 75118678 | TSS200                    | <i>TTC18</i>      | -4.325±0.535 | -4.71±0.617  | 2.51E-03 |
| cg08413366 | 10 | 75255930 | TSS200                    | <i>PPP3CB</i>     | -4.759±0.522 | -5.322±0.723 | 2.84E-05 |
| cg23588893 | 10 | 75532169 | GeneBody/1st exon         | <i>FUT11</i>      | -4.377±0.357 | -4.719±0.873 | 3.88E-03 |
| cg11993300 | 10 | 75571334 | GeneBody/5'UTR/1st exon   | <i>NDST2</i>      | -5.63±0.335  | -6.093±0.617 | 2.29E-06 |
| cg25892434 | 10 | 75911181 | GeneBody/1st intron       | <i>ADK</i>        | -4.615±0.242 | -4.941±0.409 | 1.79E-06 |
| cg20721467 | 10 | 76597927 | GeneBody/5'UTR/1st intron | <i>KAT6B</i>      | 1.051±0.346  | 1.286±0.322  | 2.79E-03 |
| cg25229706 | 10 | 76871606 | GeneBody/5'UTR/1st intron | <i>SAMD8</i>      | -4.009±0.325 | -4.348±0.385 | 2.52E-05 |
| cg02437376 | 10 | 76969880 | TSS200                    | <i>VDAC2</i>      | -4.933±0.279 | -5.275±0.442 | 6.88E-06 |
| cg03279443 | 10 | 76971052 | GeneBody/5'UTR            | <i>VDAC2</i>      | -4.015±0.322 | -4.273±0.395 | 9.56E-04 |
| cg08158570 | 10 | 77160935 | TSS1500                   | <i>ZNF503-AS2</i> | -4.921±0.388 | -5.191±0.59  | 7.16E-03 |
| cg24469803 | 10 | 79789416 | TSS200                    | <i>POLR3A</i>     | -3.485±0.658 | -3.951±0.624 | 2.27E-03 |
| cg17470697 | 10 | 81205925 | TSS1500                   | <i>ZCCHC24</i>    | -4.042±0.504 | -4.473±0.467 | 2.30E-04 |
| cg03359508 | 10 | 81964782 | TSS1500                   | <i>ANXA11</i>     | -4.372±0.26  | -4.607±0.384 | 4.62E-04 |
| cg23702568 | 10 | 88281502 | GeneBody/5'UTR/1st exon   | <i>WAPAL</i>      | -4.195±0.292 | -4.373±0.284 | 7.68E-03 |
| cg04798796 | 10 | 88855483 | GeneBody/5'UTR/1st intron | <i>FAM35A</i>     | -4.285±0.359 | -4.622±0.478 | 1.89E-04 |
| cg24552431 | 10 | 89577906 | GeneBody/5'UTR/1st exon   | <i>ATAD1</i>      | -4.35±0.289  | -4.604±0.362 | 3.57E-04 |
| cg01765473 | 10 | 89578168 | GeneBody/1st intron       | <i>CFL1P1</i>     | -5.463±0.452 | -5.871±0.601 | 3.21E-04 |
| cg04738091 | 10 | 89622084 | GeneBody/1st exon         | <i>KLLN</i>       | -5.201±0.264 | -5.534±0.405 | 3.39E-06 |
| cg21573601 | 10 | 89622589 | GeneBody/5'UTR/1st exon   | <i>KLLN</i>       | -5.329±0.352 | -5.771±0.474 | 1.81E-06 |
| cg20849549 | 10 | 89623138 | GeneBody/5'UTR/1st exon   | <i>KLLN</i>       | -4.505±0.247 | -4.657±0.238 | 7.05E-03 |
| cg16687447 | 10 | 89623336 | TSS200                    | <i>KLLN</i>       | -6.329±0.584 | -6.775±0.786 | 2.15E-03 |
| cg11917694 | 10 | 90639684 | TSS1500                   | <i>STAMBPL1</i>   | -4.311±0.285 | -4.615±0.406 | 3.80E-05 |
| cg17155596 | 10 | 90640042 | GeneBody/5'UTR/1st exon   | <i>STAMBPL1</i>   | -4.326±0.317 | -4.618±0.512 | 5.51E-04 |
| cg26461637 | 10 | 90750442 | GeneBody/5'UTR/1st exon   | <i>FAS</i>        | -6.135±0.703 | -6.7±0.641   | 4.81E-04 |
| cg05338155 | 10 | 91174651 | GeneBody/1st intron       | <i>IFIT5</i>      | -4.46±0.24   | -4.812±0.362 | 1.42E-07 |
| cg09161592 | 10 | 91405006 | GeneBody/1st exon         | <i>PANK1</i>      | -5.162±0.437 | -5.556±0.556 | 2.69E-04 |
| cg20896197 | 10 | 91461107 | TSS1500                   | <i>KIF20B</i>     | -4.94±0.358  | -5.402±0.451 | 8.00E-07 |
| cg04350610 | 10 | 93683445 | TSS1500                   | <i>BTAF1</i>      | -5.283±0.396 | -5.557±0.397 | 2.70E-03 |
| cg15965510 | 10 | 93683985 | GeneBody/1st intron       | <i>BTAF1</i>      | -4.544±0.529 | -4.974±0.621 | 7.39E-04 |
| cg25494789 | 10 | 94353331 | GeneBody/1st intron       | <i>KIF11</i>      | -4.769±0.451 | -5.041±0.478 | 9.39E-03 |
| cg11378840 | 10 | 94449797 | GeneBody/1st exon         | <i>HHEX</i>       | -5.113±0.306 | -5.429±0.666 | 8.12E-04 |
| cg07550278 | 10 | 95462365 | TSS200                    | <i>FRA10AC1</i>   | -4.943±0.517 | -5.415±0.68  | 2.57E-04 |
| cg10830758 | 10 | 95462430 | TSS200                    | <i>FRA10AC1</i>   | -3.984±0.235 | -4.251±0.33  | 1.37E-05 |
| cg08711724 | 10 | 96122379 | GeneBody/1st intron       | <i>NOC3L</i>      | -4.257±0.334 | -4.559±0.469 | 3.76E-04 |
| cg11595245 | 10 | 96305461 | TSS200                    | <i>HELLS</i>      | -4.849±0.527 | -5.219±0.558 | 2.67E-03 |
| cg20362772 | 10 | 97050690 | GeneBody/5'UTR/1st exon   | <i>PDLIM1</i>     | -5.261±0.451 | -5.774±0.607 | 1.06E-05 |
| cg12239750 | 10 | 97416566 | GeneBody/5'UTR/1st exon   | <i>ALDH18A1</i>   | -5.385±0.421 | -5.932±0.744 | 5.28E-06 |
| cg22864416 | 10 | 97803525 | GeneBody/5'UTR/1st intron | <i>CCNJ</i>       | -4.722±0.413 | -5.085±0.566 | 4.86E-04 |
| cg16779976 | 10 | 98031125 | GeneBody/1st exon         | <i>BLNK</i>       | -1.827±0.643 | -2.279±0.692 | 2.69E-03 |
| cg23628240 | 10 | 98591602 | TSS1500                   | <i>LCOR</i>       | -4.624±0.298 | -5.018±0.415 | 7.76E-07 |
| cg08443351 | 10 | 99052545 | TSS200                    | <i>ARHGAP19</i>   | -4.187±0.354 | -4.568±0.496 | 3.12E-05 |
| cg15432938 | 10 | 99078812 | TSS1500                   | <i>FRAT1</i>      | -4.346±0.257 | -4.504±0.249 | 7.36E-03 |
| cg05013695 | 10 | 99079798 | GeneBody/1st exon         | <i>FRAT1</i>      | -5.296±0.455 | -5.916±0.583 | 2.96E-07 |
| cg27212359 | 10 | 99093810 | GeneBody/1st exon         | <i>FRAT2</i>      | -5.195±0.45  | -5.609±0.647 | 3.36E-04 |
| cg09199317 | 10 | 99095018 | TSS1500                   | <i>FRAT2</i>      | -5.034±0.368 | -5.27±0.457  | 8.11E-03 |
| cg00997424 | 10 | 99400181 | TSS1500                   | <i>PI4K2A</i>     | -3.113±0.499 | -3.442±0.637 | 6.92E-03 |
| cg24343515 | 10 | 99400468 | GeneBody/5'UTR/1st exon   | <i>PI4K2A</i>     | -5.973±0.463 | -6.462±0.632 | 3.80E-05 |

|            |    |           |                           |                   |              |              |          |
|------------|----|-----------|---------------------------|-------------------|--------------|--------------|----------|
| cg13180809 | 10 | 100206399 | GeneBody/5'UTR/1st intron | <i>HPS1</i>       | -3.561±0.193 | -3.808±0.303 | 2.97E-06 |
| cg07526069 | 10 | 101190311 | GeneBody/1st exon         | <i>GOT1</i>       | -4.989±0.303 | -5.235±0.426 | 1.37E-03 |
| cg06428195 | 10 | 101191157 | TSS1500                   | <i>GOT1</i>       | -5.335±0.494 | -5.698±0.571 | 2.08E-03 |
| cg14434255 | 10 | 101419627 | GeneBody/5'UTR            | <i>ENTPD7</i>     | -3.858±0.491 | -4.261±0.583 | 6.71E-04 |
| cg09070492 | 10 | 101492601 | TSS200                    | <i>COX15</i>      | -4.651±0.341 | -4.971±0.486 | 2.53E-04 |
| cg23508052 | 10 | 102106811 | GeneBody/5'UTR/1st exon   | <i>SCD</i>        | -4.585±0.305 | -4.981±0.452 | 1.60E-06 |
| cg01430807 | 10 | 102289786 | TSS200                    | <i>NDUFB8</i>     | -4.063±0.236 | -4.201±0.214 | 9.71E-03 |
| cg07510080 | 10 | 102295549 | TSS200                    | <i>HIF1AN</i>     | -3.693±0.719 | -4.19±0.623  | 2.17E-03 |
| cg08177017 | 10 | 102672368 | GeneBody/5'UTR/1st exon   | <i>FAM178A</i>    | -3.927±0.235 | -4.213±0.328 | 3.88E-06 |
| cg19578398 | 10 | 102747015 | GeneBody/1st intron       | <i>MRPL43</i>     | -3.033±0.275 | -2.679±0.377 | 1.23E-06 |
| cg23190203 | 10 | 102791082 | GeneBody/5'UTR/1st exon   | <i>SFXN3</i>      | -5.03±0.265  | -5.489±0.461 | 9.23E-09 |
| cg19669439 | 10 | 103113668 | TSS200                    | <i>BTRC</i>       | -5.024±0.547 | -5.455±0.608 | 8.98E-04 |
| cg17710288 | 10 | 103543118 | GeneBody/1st exon         | <i>NPM3</i>       | -3.828±0.403 | -4.111±0.558 | 5.11E-03 |
| cg22482381 | 10 | 103578053 | GeneBody/5'UTR/1st exon   | <i>MGEA5</i>      | -4.996±0.34  | -5.253±0.453 | 2.31E-03 |
| cg10477754 | 10 | 103892376 | TSS1500                   | <i>PPRC1</i>      | -3.757±0.647 | -4.264±0.63  | 7.04E-04 |
| cg26831968 | 10 | 104005242 | TSS200                    | <i>GBF1</i>       | -6.242±0.613 | -6.772±0.642 | 2.58E-04 |
| cg23738770 | 10 | 104154605 | GeneBody/5'UTR/1st intron | <i>NFKB2</i>      | -4.899±0.517 | -5.35±0.724  | 5.72E-04 |
| cg25095612 | 10 | 104155650 | GeneBody/5'UTR/1st exon   | <i>NFKB2</i>      | -4.334±0.543 | -4.679±0.455 | 4.50E-03 |
| cg10488141 | 10 | 104264014 | GeneBody/1st exon         | <i>SUFU</i>       | -5.531±0.398 | -5.98±0.637  | 3.00E-05 |
| cg00793774 | 10 | 104403707 | TSS1500                   | <i>TRIM8</i>      | -5.371±0.434 | -5.654±0.437 | 4.64E-03 |
| cg05959392 | 10 | 104613928 | TSS200                    | <i>C10orf32</i>   | -4.802±0.588 | -5.156±0.51  | 7.09E-03 |
| cg24252723 | 10 | 104678150 | GeneBody/5'UTR/1st exon   | <i>CNNM2</i>      | -5.256±0.425 | -5.699±0.617 | 6.14E-05 |
| cg17877656 | 10 | 105110211 | GeneBody/1st intron       | <i>PCGF6</i>      | -4.42±0.312  | -4.757±0.49  | 5.42E-05 |
| cg01360325 | 10 | 105127811 | GeneBody/1st exon         | <i>TAF5</i>       | -5.124±0.544 | -5.451±0.567 | 9.46E-03 |
| cg07086898 | 10 | 105155966 | GeneBody/5'UTR/1st intron | <i>USMG5</i>      | -5.282±0.46  | -5.552±0.356 | 7.62E-03 |
| cg05717160 | 10 | 105156505 | GeneBody/5'UTR/1st intron | <i>PDCD11</i>     | -4.683±0.318 | -4.937±0.287 | 5.02E-04 |
| cg23333420 | 10 | 105677801 | GeneBody/5'UTR/1st intron | <i>OBFC1</i>      | -5.746±0.349 | -6.056±0.37  | 1.92E-04 |
| cg00276797 | 10 | 105726614 | TSS1500                   | <i>SLK</i>        | -4.547±0.298 | -4.797±0.447 | 1.19E-03 |
| cg22391400 | 10 | 105727767 | GeneBody/1st intron       | <i>SLK</i>        | -4.918±0.382 | -5.206±0.477 | 1.99E-03 |
| cg00646492 | 10 | 106014296 | TSS200                    | <i>GSTO1</i>      | -3.007±0.701 | -3.521±0.621 | 1.25E-03 |
| cg09770154 | 10 | 111967803 | GeneBody/1st exon         | <i>MXI1</i>       | -5.15±0.513  | -5.88±0.538  | 2.26E-03 |
| cg21872391 | 10 | 112064057 | GeneBody/5'UTR/1st intron | <i>SMNDC1</i>     | -5.097±0.368 | -5.357±0.461 | 3.69E-03 |
| cg08308257 | 10 | 112064994 | TSS1500                   | <i>SMNDC1</i>     | -4.377±0.507 | -4.74±0.636  | 3.27E-03 |
| cg06470552 | 10 | 112327234 | TSS1500                   | <i>SMC3</i>       | -4.812±0.505 | -5.287±0.55  | 9.28E-05 |
| cg16385933 | 10 | 112631792 | GeneBody/5'UTR/1st intron | <i>PDCD4</i>      | -5.469±0.546 | -5.909±0.758 | 1.38E-03 |
| cg16886188 | 10 | 112835859 | TSS1500                   | <i>ADRA2A</i>     | -4.692±0.297 | -4.909±0.51  | 7.63E-03 |
| cg11152574 | 10 | 114134550 | TSS1500                   | <i>ACSL5</i>      | 1.925±0.484  | 1.549±0.714  | 2.76E-03 |
| cg17872476 | 10 | 114205654 | GeneBody/5'UTR/1st intron | <i>ZDHHC6</i>     | 0.855±0.497  | 0.258±0.633  | 3.10E-06 |
| cg20023578 | 10 | 114709626 | TSS1500                   | <i>TCF7L2</i>     | -3.309±0.314 | -3.574±0.341 | 3.92E-04 |
| cg22906389 | 10 | 115438910 | TSS200                    | <i>CASP7</i>      | -5.351±0.312 | -5.65±0.435  | 1.71E-04 |
| cg02946754 | 10 | 115614308 | TSS200                    | <i>NHLRC2</i>     | -5.046±0.49  | -5.335±0.458 | 9.26E-03 |
| cg13420923 | 10 | 115614712 | GeneBody/1st exon         | <i>NHLRC2</i>     | -5.115±0.378 | -5.519±0.518 | 3.17E-05 |
| cg00568128 | 10 | 115934100 | TSS200                    | <i>MIR2110</i>    | -3.033±0.171 | -3.295±0.27  | 7.44E-08 |
| cg13084429 | 10 | 115999021 | GeneBody/5'UTR/1st exon   | <i>VWA2</i>       | -3.375±0.366 | -3.053±0.473 | 3.84E-04 |
| cg26528713 | 10 | 116697973 | GeneBody/5'UTR/1st exon   | <i>TRUB1</i>      | -5.849±0.488 | -6.184±0.47  | 2.71E-03 |
| cg08164900 | 10 | 119134712 | GeneBody/1st exon         | <i>PDZD8</i>      | -5.537±0.511 | -5.902±0.679 | 3.88E-03 |
| cg24257768 | 10 | 120101984 | TSS200                    | <i>FAM204A</i>    | -3.903±0.278 | -4.148±0.372 | 4.27E-04 |
| cg21289924 | 10 | 120839943 | GeneBody/1st intron       | <i>EIF3A</i>      | -5.532±0.408 | -5.976±0.605 | 3.40E-05 |
| cg18755204 | 10 | 120863723 | GeneBody/1st intron       | <i>FAM45B</i>     | -4.951±0.614 | -5.609±0.761 | 1.97E-05 |
| cg17198722 | 10 | 120938213 | GeneBody/1st intron       | <i>PRDX3</i>      | -4.992±0.384 | -5.264±0.628 | 7.84E-03 |
| cg23182539 | 10 | 121355708 | GeneBody/1st intron       | <i>TIAL1</i>      | -4.799±0.392 | -5.181±0.4   | 4.69E-05 |
| cg08102619 | 10 | 121356777 | TSS1500                   | <i>TIAL1</i>      | -4.503±0.25  | -4.727±0.281 | 1.97E-04 |
| cg27613076 | 10 | 121484944 | TSS1500                   | <i>INPP5F</i>     | -4.127±0.435 | -4.418±0.46  | 4.18E-03 |
| cg24618244 | 10 | 121485763 | GeneBody/5'UTR/1st exon   | <i>INPP5F</i>     | -5.106±0.337 | -5.373±0.41  | 1.09E-03 |
| cg09518735 | 10 | 121632717 | TSS1500                   | <i>MCMBP</i>      | -5.526±0.489 | -5.829±0.534 | 8.09E-03 |
| cg11976790 | 10 | 124320064 | TSS200                    | <i>DMBT1</i>      | -2.164±0.427 | -2.463±0.525 | 4.29E-03 |
| cg03860051 | 10 | 124768608 | GeneBody/1st intron       | <i>ACADSB</i>     | -5.012±0.461 | -5.462±0.693 | 1.88E-04 |
| cg19219920 | 10 | 126433331 | TSS1500                   | <i>FAM53B</i>     | -5.265±0.49  | -5.64±0.611  | 1.65E-03 |
| cg09245378 | 10 | 126490406 | GeneBody/1st exon         | <i>FAM175B</i>    | -5.174±0.512 | -5.506±0.434 | 3.78E-03 |
| cg03820909 | 10 | 127407979 | GeneBody/1st intron       | <i>FLJ37035</i>   | -6.141±0.473 | -6.73±0.69   | 3.13E-06 |
| cg24079455 | 10 | 127408106 | GeneBody/5'UTR/1st exon   | <i>C10orf137</i>  | -5.508±0.408 | -5.801±0.432 | 2.14E-03 |
| cg11453347 | 10 | 127512288 | GeneBody/1st exon         | <i>BCCIP</i>      | -4.292±0.35  | -4.634±0.439 | 8.71E-05 |
| cg17976829 | 10 | 131934431 | TSS1500                   | <i>GLRX3</i>      | -2.642±0.165 | -2.783±0.216 | 5.61E-04 |
| cg24582500 | 10 | 131934763 | GeneBody/1st exon         | <i>GLRX3</i>      | -3.401±0.334 | -3.151±0.451 | 2.64E-03 |
| cg21750602 | 10 | 133748026 | GeneBody/1st exon         | <i>PPP2R2D</i>    | 1.615±0.463  | 1.219±0.483  | 2.91E-04 |
| cg07284558 | 10 | 134122421 | TSS1500                   | <i>STK32C</i>     | -2.252±0.504 | -2.572±0.627 | 8.82E-03 |
| cg17803807 | 10 | 134211104 | GeneBody/1st intron       | <i>PWWP2B</i>     | -3.15±0.392  | -3.539±0.416 | 4.02E-05 |
| cg12390946 | 10 | 134351197 | TSS200                    | <i>INPP5A</i>     | -4.513±0.382 | -4.852±0.614 | 8.51E-04 |
| cg05658858 | 10 | 135121916 | TSS1500                   | <i>ZNF511</i>     | -5.215±0.385 | -5.574±0.479 | 1.60E-04 |
| cg12292686 | 10 | 135192102 | TSS1500                   | <i>PAOX</i>       | -4.465±0.347 | -4.668±0.311 | 9.53E-03 |
| cg17676129 | 10 | 135382545 | GeneBody/5'UTR/1st intron | <i>SYCE1</i>      | 0.663±0.165  | 0.791±0.32   | 7.21E-03 |
| cg06463913 | 11 | 207296    | GeneBody/1st intron       | <i>BET1L</i>      | -5.63±0.627  | -6.116±0.682 | 1.00E-03 |
| cg05086873 | 11 | 208948    | GeneBody/1st intron       | <i>RIC8A</i>      | -5.345±0.527 | -5.691±0.479 | 3.66E-03 |
| cg08843492 | 11 | 308231    | GeneBody/1st exon         | <i>IFITM2</i>     | -2.874±0.406 | -2.555±0.614 | 2.42E-03 |
| cg16000888 | 11 | 560951    | TSS200                    | <i>RASSF7</i>     | -4.855±0.565 | -5.476±0.603 | 8.19E-06 |
| cg16614500 | 11 | 694704    | TSS1500                   | <i>TMEM80</i>     | -3.291±0.543 | -3.766±0.851 | 8.82E-04 |
| cg15498283 | 11 | 747520    | GeneBody/1st exon         | <i>TALDO1</i>     | -5.741±0.469 | -6.074±0.552 | 3.01E-03 |
| cg23660999 | 11 | 777775    | TSS1500                   | <i>PDDC1</i>      | -5.345±0.6   | -5.769±0.596 | 2.20E-03 |
| cg00185839 | 11 | 804954    | GeneBody/5'UTR/1st intron | <i>PIDD</i>       | -4.348±0.348 | -4.608±0.355 | 1.32E-03 |
| cg22404646 | 11 | 833345    | GeneBody/5'UTR/1st intron | <i>CD151</i>      | -5.37±0.339  | -5.806±0.52  | 2.23E-06 |
| cg23121547 | 11 | 1593657   | TSS1500                   | <i>KRTAP5-AS1</i> | -5.797±0.449 | -6.142±0.642 | 2.53E-03 |
| cg04984200 | 11 | 1784980   | GeneBody/1st intron       | <i>CTSD</i>       | -5.395±0.451 | -5.73±0.489  | 1.56E-03 |
| cg04011872 | 11 | 1968980   | GeneBody/1st intron       | <i>MRPL23</i>     | -4.874±0.357 | -5.32±0.5    | 2.33E-06 |
| cg06233503 | 11 | 2812674   | GeneBody                  | <i>KCNQ1</i>      | -2.304±0.476 | -2.65±0.468  | 1.64E-03 |
| cg16035277 | 11 | 2923264   | TSS1500                   | <i>SLC22A18</i>   | -2.567±0.177 | -2.409±0.213 | 2.62E-04 |
| cg24139421 | 11 | 2923578   | GeneBody/5'UTR/1st exon   | <i>SLC22A18</i>   | -5.025±0.416 | -5.404±0.456 | 1.52E-04 |
| cg06211616 | 11 | 2923659   | GeneBody/5'UTR/1st intron | <i>SLC22A18</i>   | -3.924±0.261 | -4.158±0.312 | 2.41E-04 |
| cg14415214 | 11 | 2950403   | GeneBody/1st exon         | <i>PHLDA2</i>     | -5.132±0.517 | -5.551±0.633 | 8.57E-04 |
| cg26799802 | 11 | 2951353   | TSS1500                   | <i>PHLDA2</i>     | -3.917±0.398 | -4.296±0.392 | 6.27E-05 |
| cg26158980 | 11 | 3692187   | GeneBody/1st intron       | <i>CHRNA10</i>    | 2.83±0.206   | 3.042±0.311  | 8.69E-05 |
| cg21091629 | 11 | 3829534   | TSS1500                   | <i>PGAP2</i>      | -4.692±0.376 | -5.066±0.414 | 4.24E-05 |
| cg02940164 | 11 | 3829971   | GeneBody/1st intron       | <i>PGAP2</i>      | -4.457±0.226 | -4.682±0.409 | 4.00E-04 |
| cg17732521 | 11 | 3863047   | TSS1500                   | <i>RHOG</i>       | -4.629±0.438 | -4.952±0.424 | 1.35E-03 |
| cg01246405 | 11 | 3876562   | TSS1500                   | <i>STIM1</i>      | -2.761±0.376 | -2.368±0.413 | 1.94E-05 |
| cg04680304 | 11 | 4116154   | GeneBody/5'UTR/1st exon   | <i>RRM1</i>       | -4.371±0.321 | -4.74±0.457  | 1.11E-05 |

|            |    |          |                           |            |              |              |          |
|------------|----|----------|---------------------------|------------|--------------|--------------|----------|
| cg25322008 | 11 | 4719138  | TSS200                    | OR51E2     | 0.617±0.544  | 0.188±0.709  | 1.39E-03 |
| cg14544583 | 11 | 5248566  | TSS1500                   | HBB        | 0.755±0.691  | 0.126±0.925  | 2.81E-04 |
| cg20609368 | 11 | 5257253  | TSS1500                   | HBD        | 2.559±0.526  | 2.135±0.817  | 2.05E-03 |
| cg01598642 | 11 | 5272039  | TSS1500                   | HBG1       | 1.793±0.636  | 1.077±0.965  | 2.30E-05 |
| cg08970694 | 11 | 5290746  | GeneBody                  | HBE1       | 0.002±0.693  | -0.482±0.831 | 3.68E-03 |
| cg06353345 | 11 | 5322976  | GeneBody/1st exon         | OR51B4     | 0.236±0.683  | -0.413±0.886 | 1.46E-04 |
| cg20420254 | 11 | 6411394  | TSS1500                   | SMPD1      | -6.027±0.586 | -6.575±0.67  | 1.16E-04 |
| cg03756121 | 11 | 6502436  | TSS1500                   | TIMM10B    | -3.824±0.19  | -3.995±0.301 | 6.74E-04 |
| cg16824731 | 11 | 6624409  | GeneBody/1st intron       | RRP8       | -4.372±0.399 | -4.777±0.439 | 3.10E-05 |
| cg24731756 | 11 | 6625293  | GeneBody/5'UTR/1st exon   | ILK        | -5.476±0.519 | -5.861±0.571 | 1.71E-03 |
| cg23845773 | 11 | 6633739  | TSS1500                   | TAF10      | -5.159±0.416 | -5.476±0.49  | 1.50E-03 |
| cg05393484 | 11 | 6818466  | TSS1500                   | OR6A2      | 2.238±0.547  | 1.738±0.735  | 3.19E-04 |
| cg22951794 | 11 | 6867280  | GeneBody/1st exon         | OR10A5     | 0.887±0.601  | 0.405±0.772  | 1.13E-03 |
| cg03898365 | 11 | 6897491  | TSS1500                   | OR10A4     | -0.555±0.722 | -1.091±0.727 | 1.39E-03 |
| cg08558873 | 11 | 7041491  | GeneBody/5'UTR/1st exon   | ZNF214     | -3.506±0.71  | -4.011±0.708 | 2.08E-03 |
| cg01469547 | 11 | 7847155  | GeneBody/1st exon         | OR5P3      | 2.745±0.968  | 1.962±1.339  | 1.31E-03 |
| cg18484189 | 11 | 7984973  | GeneBody/1st exon         | NLRP10     | 0.141±0.698  | -0.385±0.915 | 2.30E-03 |
| cg20311730 | 11 | 7985183  | TSS200                    | NLRP10     | 1.423±0.717  | 0.801±0.978  | 5.47E-04 |
| cg26198776 | 11 | 8008872  | GeneBody/5'UTR/1st exon   | E1F3F      | -4.579±0.213 | -4.75±0.225  | 6.50E-04 |
| cg13838528 | 11 | 8704374  | GeneBody/1st intron       | RPL27A     | -5.457±0.335 | -5.672±0.454 | 9.89E-03 |
| cg08690721 | 11 | 8932380  | GeneBody/5'UTR/1st exon   | ST5        | -4.421±0.41  | -4.676±0.479 | 9.13E-03 |
| cg16176301 | 11 | 8933372  | GeneBody/1st intron       | AKIP1      | -5.16±0.386  | -5.704±0.535 | 2.16E-07 |
| cg14205126 | 11 | 8985648  | GeneBody/1st intron       | TMEM9B     | -3.6±0.368   | -3.986±0.609 | 1.13E-04 |
| cg17647744 | 11 | 8986217  | TSS200                    | TMEM9B-AS1 | -5.78±0.577  | -6.267±0.605 | 3.54E-04 |
| cg09659887 | 11 | 9406115  | TSS200                    | IPO7       | -4.426±0.643 | -4.902±0.581 | 1.15E-03 |
| cg05463705 | 11 | 9482308  | TSS200                    | LOC644656  | -5.182±0.282 | -5.411±0.346 | 8.43E-04 |
| cg15044073 | 11 | 9685299  | TSS1500                   | SWAP70     | -4.168±0.335 | -4.642±0.456 | 1.70E-07 |
| cg22172230 | 11 | 9685768  | GeneBody/1st exon         | SWAP70     | -5.484±0.425 | -5.861±0.532 | 3.16E-04 |
| cg18343862 | 11 | 10590003 | GeneBody/1st exon         | LYVE1      | 2.631±0.267  | 2.8±0.277    | 5.98E-03 |
| cg03961189 | 11 | 10772649 | TSS200                    | CTR9       | -5.505±0.382 | -5.986±0.589 | 3.57E-06 |
| cg23948874 | 11 | 10830481 | GeneBody/5'UTR/1st exon   | EIF4G2     | -5.448±0.352 | -5.727±0.374 | 7.66E-04 |
| cg18692596 | 11 | 10879861 | GeneBody/1st exon         | ZBED5-AS1  | -3.857±0.239 | -4.065±0.305 | 4.36E-04 |
| cg22529861 | 11 | 11643697 | TSS200                    | GALNT18    | -4.582±0.335 | -4.884±0.391 | 2.06E-04 |
| cg25985488 | 11 | 11643756 | TSS200                    | GALNT18    | -4.735±0.56  | -5.118±0.507 | 2.56E-03 |
| cg22967016 | 11 | 12131739 | TSS1500                   | MICAL2     | -3.948±0.548 | -4.277±0.584 | 9.85E-03 |
| cg12422683 | 11 | 12132611 | GeneBody/5'UTR/1st intron | MICAL2     | -3.905±0.472 | -4.297±0.636 | 8.73E-04 |
| cg13250711 | 11 | 12398675 | TSS1500                   | ARNTL      | -3.388±0.466 | -3.69±0.558  | 6.79E-03 |
| cg03860400 | 11 | 13485289 | TSS1500                   | BTBD10     | -2.742±0.398 | -2.42±0.511  | 1.03E-03 |
| cg14026971 | 11 | 13690461 | GeneBody/5'UTR/1st intron | FAR1       | -4.586±0.48  | -4.994±0.524 | 3.57E-04 |
| cg21288099 | 11 | 14380330 | TSS1500                   | RRAS2      | -5.807±0.552 | -6.303±0.598 | 1.71E-04 |
| cg06938878 | 11 | 15094364 | TSS1500                   | CALCB      | 2.895±0.511  | 2.239±1      | 1.54E-05 |
| cg08466074 | 11 | 16760365 | GeneBody/1st exon         | C11orf58   | -3.252±0.479 | -3.571±0.603 | 6.12E-03 |
| cg12575751 | 11 | 17297984 | TSS1500                   | NUCB2      | -5.11±0.326  | -5.49±0.522  | 1.84E-05 |
| cg13383490 | 11 | 18548806 | TSS1500                   | TSG101     | -4.64±0.387  | -4.93±0.354  | 1.03E-03 |
| cg25685640 | 11 | 19262412 | GeneBody/5'UTR/1st exon   | E2F8       | -4.02±0.385  | -4.321±0.562 | 2.23E-03 |
| cg25018329 | 11 | 19262547 | TSS200                    | E2F8       | -4.701±0.439 | -5.025±0.591 | 3.06E-03 |
| cg06675341 | 11 | 20408613 | TSS1500                   | PRMT3      | -4.196±0.335 | -4.538±0.485 | 7.91E-05 |
| cg03794550 | 11 | 22646597 | GeneBody/1st exon         | FANCF      | -5.027±0.431 | -5.326±0.543 | 4.39E-03 |
| cg02300906 | 11 | 22647486 | TSS200                    | FANCF      | -4.672±0.368 | -5.013±0.506 | 2.56E-04 |
| cg13360150 | 11 | 27528592 | GeneBody/1st intron       | BDNF-AS    | -3.56±0.312  | -3.767±0.404 | 6.79E-03 |
| cg14927277 | 11 | 28129967 | GeneBody/5'UTR/1st exon   | METTL15    | -3.494±0.21  | -3.804±0.315 | 1.27E-07 |
| cg12743894 | 11 | 30344937 | GeneBody/5'UTR/1st intron | ARL14EP    | -6.703±0.597 | -7.157±0.616 | 1.13E-03 |
| cg06790862 | 11 | 30601783 | GeneBody/1st intron       | MPPED2     | 2.421±0.447  | 2.056±0.608  | 1.12E-03 |
| cg02255732 | 11 | 31150189 | 0                         | 0          | 0.225±0.634  | -0.297±0.737 | 7.08E-04 |
| cg10583382 | 11 | 31531364 | GeneBody/1st exon         | ELP4       | -5.422±0.573 | -5.919±0.536 | 2.05E-04 |
| cg18788872 | 11 | 32605728 | GeneBody/1st intron       | EIF3M      | -4.82±0.335  | -5.193±0.368 | 7.00E-06 |
| cg25409040 | 11 | 33183343 | GeneBody/1st intron       | CSTF3-AS1  | -4.768±0.535 | -5.238±0.688 | 3.90E-04 |
| cg20656116 | 11 | 33757858 | GeneBody/5'UTR/1st intron | CD59       | -4.737±0.364 | -4.974±0.464 | 7.68E-03 |
| cg03445474 | 11 | 34073002 | TSS1500                   | CAPRIN1    | -4.439±0.395 | -4.878±0.679 | 6.11E-05 |
| cg16218377 | 11 | 34073324 | GeneBody/5'UTR/1st exon   | CAPRIN1    | -5.901±0.609 | -6.405±0.62  | 4.20E-04 |
| cg19072037 | 11 | 34127281 | GeneBody/5'UTR/1st exon   | NAT10      | -4.892±0.247 | -5.207±0.391 | 3.29E-06 |
| cg20728639 | 11 | 34379053 | GeneBody/1st exon         | ABTB2      | -5.137±0.409 | -5.46±0.526  | 1.33E-03 |
| cg20869710 | 11 | 34938234 | TSS1500                   | APIP       | -5.198±0.437 | -5.55±0.417  | 5.07E-04 |
| cg17640322 | 11 | 35160462 | GeneBody/5'UTR/1st exon   | CD44       | -4.711±1.214 | -5.467±0.799 | 4.18E-03 |
| cg18652941 | 11 | 35160892 | GeneBody/1st exon         | CD44       | -3.689±0.527 | -4.084±0.335 | 6.86E-04 |
| cg02186948 | 11 | 36310854 | GeneBody/1st intron       | COMMD9     | -4.594±0.392 | -4.917±0.447 | 5.74E-04 |
| cg23957424 | 11 | 36532056 | TSS200                    | TRAF6      | -4.502±0.351 | -4.909±0.475 | 5.47E-06 |
| cg07912181 | 11 | 43702277 | GeneBody/5'UTR/1st exon   | HSD17B12   | -6.186±0.434 | -6.652±0.577 | 2.50E-05 |
| cg26478074 | 11 | 43702299 | GeneBody/5'UTR/1st exon   | HSD17B12   | -4.514±0.292 | -4.908±0.442 | 8.41E-07 |
| cg27068170 | 11 | 43702737 | GeneBody/1st intron       | HSD17B12   | -4.702±0.382 | -5.125±0.544 | 2.16E-05 |
| cg24612772 | 11 | 44117021 | TSS200                    | EXT2       | -3.315±0.481 | -3.751±0.669 | 3.60E-04 |
| cg02620470 | 11 | 44117187 | GeneBody/5'UTR/1st exon   | EXT2       | -5.161±0.506 | -5.525±0.51  | 1.85E-03 |
| cg01618083 | 11 | 45868993 | GeneBody/1st exon         | CRY2       | -5.197±0.4   | -5.478±0.55  | 5.01E-03 |
| cg24691578 | 11 | 45869488 | GeneBody/1st intron       | CRY2       | -4.823±0.282 | -5.121±0.426 | 6.14E-05 |
| cg16280313 | 11 | 45939543 | GeneBody/5'UTR/1st exon   | PEX16      | -4.518±0.362 | -4.809±0.415 | 7.87E-04 |
| cg06622725 | 11 | 45939917 | TSS1500                   | PEX16      | -6.403±0.563 | -6.939±0.696 | 1.16E-04 |
| cg10403260 | 11 | 46142963 | GeneBody/5'UTR/1st exon   | PHF21A     | -5.424±0.646 | -5.877±0.678 | 2.59E-03 |
| cg18925548 | 11 | 46402535 | TSS200                    | MDK        | -4.604±0.252 | -4.844±0.588 | 3.15E-03 |
| cg07022885 | 11 | 46638638 | GeneBody/5'UTR/1st intron | HARBI1     | -5.064±0.354 | -5.351±0.346 | 5.08E-04 |
| cg14585160 | 11 | 46722671 | GeneBody/1st exon         | ZNF408     | -5.26±0.466  | -5.577±0.49  | 3.48E-03 |
| cg17891278 | 11 | 47198315 | GeneBody/1st intron       | ARFGAP2    | -5.266±0.498 | -5.626±0.555 | 2.23E-03 |
| cg04444006 | 11 | 47198757 | TSS200                    | ARFGAP2    | -4.113±0.413 | -4.435±0.473 | 1.11E-03 |
| cg24099544 | 11 | 47291115 | TSS200                    | MADD       | -6.225±0.489 | -6.676±0.65  | 2.33E-04 |
| cg10264187 | 11 | 47429713 | TSS1500                   | SLC39A13   | -5.091±0.525 | -5.563±0.615 | 2.17E-04 |
| cg24576270 | 11 | 47574547 | GeneBody/5'UTR/1st exon   | CELF1      | -4.963±0.427 | -5.323±0.44  | 3.37E-04 |
| cg21681756 | 11 | 47600081 | GeneBody/5'UTR/1st intron | KBTBD4     | -4.511±0.358 | -4.911±0.556 | 3.04E-05 |
| cg02772367 | 11 | 47870447 | TSS1500                   | NUP160     | -4.564±0.495 | -4.962±0.515 | 6.10E-04 |
| cg14775560 | 11 | 49230168 | GeneBody/5'UTR/1st exon   | FOLH1      | -2.633±0.694 | -3.053±0.626 | 7.22E-03 |
| cg04962134 | 11 | 55653310 | GeneBody                  | TRIM51     | 1.147±0.612  | 0.626±0.667  | 3.51E-04 |
| cg25890048 | 11 | 55703443 | GeneBody/1st exon         | OR511      | 1.327±0.76   | 0.856±0.891  | 9.26E-03 |
| cg07764959 | 11 | 57282648 | TSS1500                   | SLC43A1    | -4.561±0.783 | -5.137±0.689 | 1.21E-03 |
| cg05677402 | 11 | 57335051 | GeneBody/1st intron       | UBE2L6     | -6.163±0.638 | -6.65±0.56   | 7.89E-04 |
| cg23491309 | 11 | 57335585 | GeneBody/5'UTR/1st exon   | UBE2L6     | -5.347±0.583 | -5.72±0.666  | 6.91E-03 |
| cg01959848 | 11 | 57480394 | GeneBody/1st intron       | TMX2       | -5.138±0.492 | -5.527±0.705 | 1.90E-03 |
| cg23641267 | 11 | 58343791 | TSS1500                   | LPXN       | 1.088±0.401  | 1.371±0.486  | 3.43E-03 |

|            |    |          |                           |                   |              |              |          |
|------------|----|----------|---------------------------|-------------------|--------------|--------------|----------|
| cg13864937 | 11 | 58874733 | GeneBody/5'UTR/1st exon   | <i>FAM111B</i>    | -4.505±0.561 | -4.914±0.395 | 1.00E-03 |
| cg24238205 | 11 | 58912174 | TSS200                    | <i>FAM111A</i>    | -4.323±0.224 | -4.594±0.326 | 5.68E-06 |
| cg19105504 | 11 | 60524472 | GeneBody/1st exon         | <i>MS4A15</i>     | -0.748±0.962 | -1.367±0.834 | 4.16E-03 |
| cg07962043 | 11 | 60691582 | TSS1500                   | <i>TMEM132A</i>   | -3.418±0.334 | -3.752±0.417 | 5.76E-05 |
| cg16418684 | 11 | 61062205 | GeneBody/1st intron       | <i>VWCE</i>       | -4.124±0.745 | -4.56±0.494  | 6.90E-03 |
| cg21043754 | 11 | 61100532 | TSS200                    | <i>DAK</i>        | -5.753±0.54  | -6.191±0.605 | 6.66E-04 |
| cg03160637 | 11 | 61101089 | TSS1500                   | <i>DDB1</i>       | -4.396±0.586 | -4.769±0.542 | 5.11E-03 |
| cg03293770 | 11 | 61197075 | GeneBody/1st intron       | <i>CPSF7</i>      | -4.636±0.543 | -5.12±0.639  | 2.43E-04 |
| cg13744070 | 11 | 61197882 | GeneBody/1st intron       | <i>SDHAF2</i>     | -4.728±0.404 | -5.053±0.601 | 1.81E-03 |
| cg14572111 | 11 | 61348901 | TSS1500                   | <i>SYT7</i>       | -4.386±0.245 | -4.704±0.393 | 2.60E-06 |
| cg11730100 | 11 | 61560294 | GeneBody/5'UTR/1st exon   | <i>FEN1</i>       | -3.137±0.437 | -2.769±0.48  | 4.01E-04 |
| cg18495298 | 11 | 61658590 | GeneBody/1st intron       | <i>FADS3</i>      | -3.773±0.162 | -3.938±0.29  | 2.66E-04 |
| cg20691408 | 11 | 61659465 | TSS1500                   | <i>FADS3</i>      | -3.054±0.473 | -3.428±0.521 | 8.55E-04 |
| cg15589156 | 11 | 61684592 | GeneBody/1st intron       | <i>RAB3IL1</i>    | -4.223±0.541 | -4.642±0.668 | 1.45E-03 |
| cg01772980 | 11 | 61957695 | TSS200                    | <i>SCGB1D1</i>    | 0.97±0.792   | 0.435±0.708  | 2.82E-03 |
| cg26041297 | 11 | 62009811 | GeneBody/1st exon         | <i>SCGB1D2</i>    | -0.423±0.378 | -0.745±0.484 | 5.49E-04 |
| cg21643860 | 11 | 62358814 | GeneBody/1st intron       | <i>TUT1</i>       | -5.298±0.523 | -5.624±0.579 | 8.00E-03 |
| cg19570317 | 11 | 62368881 | GeneBody/1st intron       | <i>MTA2</i>       | -5.571±0.608 | -5.989±0.648 | 3.31E-03 |
| cg09086761 | 11 | 62369541 | TSS1500                   | <i>MTA2</i>       | -5.656±0.629 | -6.089±0.638 | 2.90E-03 |
| cg01858173 | 11 | 62380679 | TSS1500                   | <i>EML3</i>       | -4.067±0.257 | -4.262±0.415 | 4.34E-03 |
| cg11706746 | 11 | 62389756 | TSS200                    | <i>B3GAT3</i>     | -5.374±0.33  | -5.768±0.455 | 4.98E-06 |
| cg23202409 | 11 | 62439262 | TSS200                    | <i>C11orf48</i>   | -5.573±0.539 | -5.91±0.512  | 5.95E-03 |
| cg17240496 | 11 | 62446340 | GeneBody/1st exon         | <i>UBXN1</i>      | -5.591±0.4   | -5.843±0.497 | 9.27E-03 |
| cg22091798 | 11 | 62446605 | TSS200                    | <i>UBXN1</i>      | -4.772±0.28  | -5.082±0.393 | 2.04E-05 |
| cg05059825 | 11 | 62495950 | TSS200                    | <i>TTC9C</i>      | -4.582±0.532 | -4.928±0.539 | 4.81E-03 |
| cg02600515 | 11 | 62521696 | TSS200                    | <i>ZBTB3</i>      | -4.151±0.412 | -4.525±0.405 | 1.19E-04 |
| cg16467694 | 11 | 62529198 | GeneBody/1st intron       | <i>POLR2G</i>     | -4.745±0.388 | -5.038±0.435 | 1.40E-03 |
| cg26125443 | 11 | 62529213 | GeneBody/1st intron       | <i>POLR2G</i>     | -4.791±0.351 | -5.037±0.413 | 3.42E-03 |
| cg06840239 | 11 | 62539043 | GeneBody/5'UTR/1st intron | <i>TAF6L</i>      | -4.925±0.266 | -5.143±0.309 | 6.54E-04 |
| cg18394496 | 11 | 62554881 | GeneBody/5'UTR/1st exon   | <i>TMEM179B</i>   | -6.261±0.485 | -6.709±0.649 | 2.36E-04 |
| cg21759080 | 11 | 62599762 | TSS200                    | <i>STX5</i>       | -5.306±0.708 | -5.746±0.543 | 5.34E-03 |
| cg25599242 | 11 | 63304337 | GeneBody/5'UTR/1st exon   | <i>RARRES3</i>    | -3.181±0.568 | -3.547±0.486 | 4.02E-03 |
| cg13245912 | 11 | 63449340 | GeneBody/1st intron       | <i>RTN3</i>       | -5.274±0.41  | -5.596±0.594 | 2.09E-03 |
| cg23957915 | 11 | 63684911 | TSS1500                   | <i>RCOR2</i>      | -5.065±0.485 | -5.709±0.771 | 1.60E-06 |
| cg12785087 | 11 | 63705946 | TSS1500                   | <i>NAA40</i>      | -4.889±0.362 | -5.245±0.475 | 9.51E-05 |
| cg19357918 | 11 | 63953256 | TSS1500                   | <i>STIP1</i>      | -4.401±0.413 | -4.639±0.339 | 9.33E-03 |
| cg06632528 | 11 | 63993432 | TSS200                    | <i>TRPT1</i>      | -5.177±0.348 | -5.476±0.402 | 3.68E-04 |
| cg15768270 | 11 | 63993915 | GeneBody/5'UTR/1st intron | <i>NUDT22</i>     | -4.629±0.38  | -4.916±0.551 | 3.04E-03 |
| cg13620770 | 11 | 64051738 | TSS200                    | <i>GPR137</i>     | -2.241±0.255 | -1.945±0.31  | 4.78E-06 |
| cg11296937 | 11 | 64084966 | GeneBody/1st exon         | <i>TRMT112</i>    | -2.005±0.313 | -1.748±0.364 | 6.53E-04 |
| cg17589175 | 11 | 64085337 | TSS1500                   | <i>PRDX5</i>      | -5.084±0.394 | -5.365±0.488 | 3.18E-03 |
| cg24970539 | 11 | 64126392 | TSS1500                   | <i>RPS6KA4</i>    | -3.483±0.247 | -3.666±0.313 | 2.41E-03 |
| cg22833292 | 11 | 64126806 | GeneBody/1st intron       | <i>RPS6KA4</i>    | -3.807±0.285 | -4.014±0.358 | 3.00E-03 |
| cg11295902 | 11 | 64546368 | TSS200                    | <i>SF1</i>        | -5.042±0.718 | -5.528±0.674 | 2.96E-03 |
| cg16668394 | 11 | 64578521 | GeneBody/5'UTR/1st exon   | <i>MEN1</i>       | -3.861±0.416 | -4.188±0.573 | 1.73E-03 |
| cg01866521 | 11 | 64646436 | TSS1500                   | <i>EHD1</i>       | -4.568±0.31  | -4.748±0.218 | 7.60E-03 |
| cg04480914 | 11 | 64692198 | GeneBody/5'UTR/1st exon   | <i>PPP2R5B</i>    | -6.213±0.546 | -6.606±0.597 | 2.25E-03 |
| cg17022914 | 11 | 64764564 | TSS200                    | <i>BATF2</i>      | -3.94±0.477  | -4.356±0.403 | 1.54E-04 |
| cg19017420 | 11 | 64781299 | TSS1500                   | <i>ARL2-SNX15</i> | -4.028±0.429 | -4.359±0.551 | 1.66E-03 |
| cg15225105 | 11 | 64808343 | TSS200                    | <i>SAC3D1</i>     | -4.4±0.334   | -4.822±0.63  | 1.47E-05 |
| cg02646854 | 11 | 64863958 | GeneBody/1st intron       | <i>VPS51</i>      | -4.529±0.453 | -4.837±0.452 | 3.18E-03 |
| cg14430111 | 11 | 64879374 | GeneBody/1st exon         | <i>TM7SF2</i>     | -5.68±0.604  | -6.067±0.644 | 6.06E-03 |
| cg16209630 | 11 | 64885070 | GeneBody/1st exon         | <i>ZNHIT2</i>     | -5.911±0.474 | -6.199±0.519 | 9.67E-03 |
| cg19313758 | 11 | 64889193 | TSS1500                   | <i>MRPL49</i>     | -5.478±0.449 | -5.766±0.421 | 4.76E-03 |
| cg05072951 | 11 | 64949398 | GeneBody/1st exon         | <i>CAPN1</i>      | -4.938±0.431 | -5.21±0.485  | 7.23E-03 |
| cg04780126 | 11 | 65029484 | GeneBody/5'UTR/1st exon   | <i>POLA2</i>      | -4.479±0.396 | -4.863±0.493 | 9.00E-05 |
| cg02186298 | 11 | 65101602 | GeneBody/1st intron       | <i>DPF2</i>       | -2.771±0.205 | -2.925±0.271 | 2.45E-03 |
| cg12788061 | 11 | 65122441 | GeneBody/5'UTR/1st intron | <i>TIGD3</i>      | -4.855±0.303 | -5.091±0.544 | 5.22E-03 |
| cg02344238 | 11 | 65153777 | TSS1500                   | <i>FRMD8</i>      | -4.393±0.279 | -4.718±0.407 | 1.02E-05 |
| cg15854296 | 11 | 65382529 | TSS1500                   | <i>MAP3K11</i>    | -4.04±0.467  | -4.458±0.443 | 1.34E-04 |
| cg04172043 | 11 | 65430868 | TSS1500                   | <i>RELA</i>       | -5.125±0.397 | -5.55±0.506  | 2.18E-05 |
| cg19379303 | 11 | 65488190 | GeneBody/1st exon         | <i>RNASEH2C</i>   | -5.912±0.61  | -6.31±0.821  | 8.64E-03 |
| cg20315951 | 11 | 65554398 | TSS200                    | <i>OVOL1</i>      | -4.153±0.407 | -4.561±0.711 | 2.93E-04 |
| cg02715140 | 11 | 65625717 | GeneBody/5'UTR/1st exon   | <i>CFL1</i>       | -5.395±0.559 | -5.747±0.5   | 5.29E-03 |
| cg04946535 | 11 | 65627070 | TSS1500                   | <i>MUS81</i>      | -5.131±0.241 | -5.31±0.292  | 2.12E-03 |
| cg15883761 | 11 | 65627811 | TSS200                    | <i>MUS81</i>      | -4.904±0.42  | -5.36±0.495  | 1.37E-05 |
| cg04949741 | 11 | 65640486 | TSS200                    | <i>EFEMP2</i>     | -2.821±0.542 | -3.181±0.564 | 4.28E-03 |
| cg12930602 | 11 | 65657895 | GeneBody/5'UTR/1st exon   | <i>CCDC85B</i>    | -4.149±0.458 | -4.53±0.635  | 9.61E-04 |
| cg10172318 | 11 | 65686003 | GeneBody/1st intron       | <i>C11orf68</i>   | -4.169±0.497 | -4.571±0.72  | 1.52E-03 |
| cg06285486 | 11 | 65729635 | GeneBody/1st intron       | <i>SART1</i>      | -3.651±0.189 | -3.499±0.203 | 6.81E-04 |
| cg09462587 | 11 | 65769444 | TSS200                    | <i>BANF1</i>      | -4.499±0.446 | -4.801±0.527 | 4.63E-03 |
| cg04197135 | 11 | 65769867 | TSS1500                   | <i>EIF1AD</i>     | -4.934±0.409 | -5.233±0.357 | 1.23E-03 |
| cg24532669 | 11 | 66112147 | GeneBody/5'UTR/1st intron | <i>BRMS1</i>      | -4.73±0.494  | -5.017±0.442 | 9.80E-03 |
| cg17415721 | 11 | 66140101 | TSS1500                   | <i>SLC29A2</i>    | -3.516±0.372 | -3.756±0.454 | 7.33E-03 |
| cg24394865 | 11 | 66206319 | TSS200                    | <i>MRPL11</i>     | -4.156±0.291 | -4.478±0.404 | 1.95E-05 |
| cg27388792 | 11 | 66247347 | TSS200                    | <i>DPP3</i>       | -5.417±0.486 | -5.794±0.563 | 1.19E-03 |
| cg27441551 | 11 | 66247971 | GeneBody/5'UTR/1st intron | <i>DPP3</i>       | -5.064±0.402 | -5.569±0.615 | 3.57E-06 |
| cg08420085 | 11 | 66313549 | GeneBody/5'UTR/1st exon   | <i>ZDHHC24</i>    | -4.364±0.287 | -4.657±0.627 | 9.70E-04 |
| cg18130076 | 11 | 66384026 | TSS200                    | <i>RBM14-RBM4</i> | -5.319±0.291 | -5.513±0.309 | 4.43E-03 |
| cg03429582 | 11 | 66406312 | GeneBody/5'UTR/1st intron | <i>RBM4</i>       | -5.395±0.485 | -5.796±0.62  | 7.64E-04 |
| cg14519515 | 11 | 67033594 | TSS1500                   | <i>ADRBK1</i>     | -2.231±0.57  | -2.592±0.558 | 5.61E-03 |
| cg02066887 | 11 | 67120405 | GeneBody                  | <i>POLD4</i>      | -5.012±0.33  | -5.262±0.621 | 7.72E-03 |
| cg01787047 | 11 | 67159079 | TSS1500                   | <i>RAD9A</i>      | -5.269±0.417 | -5.631±0.566 | 5.59E-04 |
| cg24570987 | 11 | 67195973 | GeneBody/5'UTR/1st exon   | <i>RPS6KB2</i>    | -6.313±0.508 | -6.676±0.583 | 2.70E-03 |
| cg09541468 | 11 | 67211245 | GeneBody/5'UTR/1st exon   | <i>CORO1B</i>     | -5.67±0.619  | -6.193±0.562 | 2.54E-04 |
| cg15810744 | 11 | 67211300 | TSS200                    | <i>CORO1B</i>     | -4.673±0.285 | -4.891±0.305 | 1.12E-03 |
| cg15039399 | 11 | 67275985 | GeneBody/5'UTR/1st exon   | <i>CDK2AP2</i>    | -5.86±0.486  | -6.409±0.671 | 1.31E-05 |
| cg19038228 | 11 | 67373977 | TSS1500                   | <i>NDUFV1</i>     | -4.51±0.345  | -4.927±0.506 | 5.70E-06 |
| cg16625125 | 11 | 67397578 | TSS200                    | <i>NUDT8</i>      | -4.892±0.436 | -5.422±0.664 | 6.33E-06 |
| cg21631409 | 11 | 67449882 | TSS1500                   | <i>ALDH3B2</i>    | -0.459±0.47  | -0.759±0.489 | 5.97E-03 |
| cg08139833 | 11 | 67798212 | GeneBody/5'UTR/1st intron | <i>NDUFS8</i>     | -5.275±0.385 | -5.776±0.61  | 2.23E-06 |
| cg24030630 | 11 | 67806668 | GeneBody/5'UTR/1st intron | <i>TCIRG1</i>     | -5.519±0.495 | -5.912±0.561 | 8.76E-04 |
| cg21572997 | 11 | 68080756 | GeneBody/1st intron       | <i>LRP5</i>       | -5.306±0.633 | -5.711±0.599 | 4.98E-03 |
| cg05650764 | 11 | 68227812 | TSS1500                   | <i>PPP6R3</i>     | -4.712±0.283 | -4.942±0.421 | 1.57E-03 |
| cg17404081 | 11 | 68228768 | GeneBody/5'UTR/1st intron | <i>PPP6R3</i>     | -4.933±0.303 | -5.158±0.318 | 1.48E-03 |

|            |    |           |                           |                   |              |              |          |
|------------|----|-----------|---------------------------|-------------------|--------------|--------------|----------|
| cg10413342 | 11 | 68671697  | GeneBody/1st intron       | <i>IGHMBP2</i>    | -5.138±0.379 | -5.394±0.458 | 4.99E-03 |
| cg00858899 | 11 | 69455277  | TSS1500                   | <i>CCND1</i>      | -3.868±0.707 | -4.35±0.524  | 2.08E-03 |
| cg08170622 | 11 | 69455877  | GeneBody/5'UTR/1st exon   | <i>CCND1</i>      | -4.261±0.345 | -4.63±0.455  | 2.71E-05 |
| cg05164185 | 11 | 69456412  | GeneBody/1st intron       | <i>CCND1</i>      | -3.663±0.489 | -4.011±0.684 | 4.75E-03 |
| cg20821095 | 11 | 70049116  | TSS200                    | <i>FADD</i>       | -4.83±0.526  | -5.316±0.555 | 1.09E-04 |
| cg06384026 | 11 | 70117429  | GeneBody/1st intron       | <i>PPFIA1</i>     | -5.341±0.405 | -5.606±0.419 | 4.79E-03 |
| cg18187335 | 11 | 70244230  | TSS1500                   | <i>CTTN</i>       | -3.791±0.243 | -4±0.301     | 4.35E-04 |
| cg08440425 | 11 | 71790735  | TSS1500                   | <i>LRTOMT</i>     | -3.044±0.473 | -3.453±0.625 | 5.24E-04 |
| cg17058777 | 11 | 71814579  | TSS200                    | <i>LAMTOR1</i>    | -4.309±0.345 | -4.648±0.421 | 6.94E-05 |
| cg20411654 | 11 | 72145355  | GeneBody/5'UTR/1st exon   | <i>CLPB</i>       | -5.261±0.624 | -5.739±0.534 | 7.30E-04 |
| cg17114257 | 11 | 72854156  | TSS1500                   | <i>FCHSD2</i>     | -5.359±0.492 | -5.753±0.722 | 1.75E-03 |
| cg22051865 | 11 | 73019002  | TSS1500                   | <i>ARHGEF17</i>   | -5.627±0.512 | -5.973±0.55  | 3.77E-03 |
| cg19800926 | 11 | 73087939  | GeneBody/5'UTR/1st intron | <i>RELT</i>       | -5.225±0.561 | -5.763±0.628 | 7.80E-05 |
| cg04824341 | 11 | 73587915  | TSS200                    | <i>COA4</i>       | -4.506±0.345 | -4.771±0.515 | 2.94E-03 |
| cg14433673 | 11 | 73694579  | TSS1500                   | <i>UCP2</i>       | -6.076±0.562 | -6.524±0.683 | 1.03E-03 |
| cg17983274 | 11 | 73882285  | GeneBody/5'UTR/1st exon   | <i>PPME1</i>      | -5.188±0.637 | -5.769±0.592 | 1.00E-04 |
| cg00469635 | 11 | 73882471  | GeneBody/1st exon         | <i>PPME1</i>      | -4.917±0.439 | -5.276±0.588 | 1.05E-03 |
| cg15214137 | 11 | 74109221  | GeneBody/5'UTR/1st exon   | <i>PGM2L1</i>     | -4.465±0.329 | -4.78±0.536  | 3.63E-04 |
| cg09515805 | 11 | 74109729  | TSS1500                   | <i>PGM2L1</i>     | -4.731±0.327 | -5.006±0.45  | 8.17E-04 |
| cg27076799 | 11 | 74303461  | TSS200                    | <i>POLD3</i>      | -3.821±0.334 | -4.095±0.553 | 2.32E-03 |
| cg08839620 | 11 | 74303786  | GeneBody/1st exon         | <i>POLD3</i>      | -5.381±0.6   | -5.761±0.563 | 5.33E-03 |
| cg10474368 | 11 | 74660190  | GeneBody/5'UTR/1st exon   | <i>XRRRA1</i>     | -6.17±0.549  | -6.748±0.695 | 2.84E-05 |
| cg17356532 | 11 | 74660536  | GeneBody/1st intron       | <i>SPCS2</i>      | -4.183±0.263 | -4.419±0.395 | 5.42E-04 |
| cg27512828 | 11 | 75526058  | TSS200                    | <i>UVRAG</i>      | -4.079±0.359 | -4.402±0.596 | 8.66E-04 |
| cg20461541 | 11 | 76092535  | TSS1500                   | <i>PRKRIR</i>     | -5.292±0.618 | -5.774±0.718 | 1.12E-03 |
| cg15765532 | 11 | 76156397  | GeneBody/5'UTR/1st intron | <i>C11orf30</i>   | -4.515±0.399 | -4.852±0.558 | 8.49E-04 |
| cg04790829 | 11 | 76494705  | GeneBody/5'UTR/1st intron | <i>TSKU</i>       | -5.41±0.406  | -5.689±0.47  | 3.84E-03 |
| cg22992570 | 11 | 76572061  | GeneBody/1st exon         | <i>ACER3</i>      | -5.149±0.418 | -5.508±0.546 | 5.42E-04 |
| cg16641915 | 11 | 76778247  | GeneBody/5'UTR/1st intron | <i>CAPN5</i>      | -4.71±0.386  | -4.971±0.561 | 7.80E-03 |
| cg21086464 | 11 | 77184925  | GeneBody/5'UTR/1st exon   | <i>PAK1</i>       | -4.985±0.537 | -5.356±0.655 | 4.16E-03 |
| cg24715106 | 11 | 77301139  | GeneBody/1st exon         | <i>AQP11</i>      | -5.125±0.433 | -5.429±0.45  | 2.61E-03 |
| cg02901159 | 11 | 77348811  | GeneBody/5'UTR/1st exon   | <i>CLNS1A</i>     | -5.349±0.585 | -5.74±0.561  | 3.49E-03 |
| cg23692497 | 11 | 77706182  | TSS1500                   | <i>INTS4</i>      | -4.401±0.39  | -4.791±0.461 | 5.02E-05 |
| cg03476370 | 11 | 77791237  | GeneBody/5'UTR/1st exon   | <i>NDUFC2</i>     | -3.755±0.47  | -4.094±0.619 | 3.47E-03 |
| cg04574442 | 11 | 77850977  | GeneBody/1st exon         | <i>KCTD21-AS1</i> | -4.626±0.445 | -4.979±0.59  | 1.38E-03 |
| cg18341054 | 11 | 77825295  | GeneBody/5'UTR/1st intron | <i>NARS2</i>      | -3.548±0.567 | -3.926±0.603 | 4.28E-03 |
| cg21373526 | 11 | 82782794  | GeneBody/5'UTR/1st exon   | <i>RAB30</i>      | -4±0.507     | -4.397±0.57  | 9.84E-04 |
| cg15749322 | 11 | 82905199  | TSS200                    | <i>ANKRD42</i>    | -4.445±0.542 | -4.883±0.534 | 5.18E-04 |
| cg19875047 | 11 | 82905709  | GeneBody/5'UTR/1st exon   | <i>ANKRD42</i>    | -4.992±0.466 | -5.283±0.447 | 6.05E-03 |
| cg19941758 | 11 | 82997468  | TSS200                    | <i>CCDC90B</i>    | -5.311±0.395 | -5.958±0.711 | 5.16E-08 |
| cg17597195 | 11 | 85339608  | TSS200                    | <i>TMEM126B</i>   | -5.357±0.458 | -5.648±0.459 | 5.88E-03 |
| cg16417437 | 11 | 85358767  | TSS200                    | <i>TMEM126A</i>   | -3.868±0.506 | -4.395±0.578 | 2.36E-05 |
| cg19846131 | 11 | 85375464  | GeneBody/1st exon         | <i>CREBZF</i>     | -4.335±0.3   | -4.517±0.284 | 7.57E-03 |
| cg10507961 | 11 | 85565852  | TSS1500                   | <i>CCDC83</i>     | -5.064±0.546 | -5.456±0.592 | 2.23E-03 |
| cg25437402 | 11 | 85779802  | GeneBody/1st exon         | <i>PICALM</i>     | -5.533±0.437 | -5.909±0.637 | 7.85E-04 |
| cg00080012 | 11 | 85955689  | TSS200                    | <i>EED</i>        | -5.781±0.481 | -6.128±0.41  | 1.42E-03 |
| cg01492649 | 11 | 86749237  | GeneBody/1st intron       | <i>TMEM135</i>    | -3.857±0.226 | -4.129±0.336 | 6.12E-06 |
| cg01761409 | 11 | 87908192  | GeneBody/1st intron       | <i>RAB38</i>      | -4.666±0.67  | -5.14±0.491  | 1.42E-03 |
| cg04209631 | 11 | 93474517  | GeneBody/5'UTR/1st exon   | <i>TAIF1D</i>     | -5.294±0.592 | -5.7±0.627   | 3.26E-03 |
| cg18113787 | 11 | 93517536  | GeneBody/5'UTR/1st exon   | <i>MED17</i>      | -4.963±0.34  | -5.221±0.544 | 4.11E-03 |
| cg12631737 | 11 | 94277190  | GeneBody/5'UTR/1st exon   | <i>FUT4</i>       | -3.585±0.219 | -3.803±0.293 | 8.41E-05 |
| cg20096208 | 11 | 94706512  | GeneBody/5'UTR/1st intron | <i>CWC15</i>      | -4.953±0.531 | -5.318±0.481 | 2.44E-03 |
| cg11665588 | 11 | 94963991  | GeneBody/1st exon         | <i>SESN3</i>      | -3.793±0.435 | -4.065±0.369 | 5.11E-03 |
| cg06044117 | 11 | 95523445  | TSS200                    | <i>CEP57</i>      | -5.734±0.61  | -6.351±0.628 | 2.73E-05 |
| cg04280758 | 11 | 96076485  | TSS200                    | <i>MAML2</i>      | -5.533±0.66  | -5.977±0.48  | 2.29E-03 |
| cg14481222 | 11 | 102187974 | TSS1500                   | <i>BIRC3</i>      | -3.727±0.621 | -4.093±0.49  | 7.57E-03 |
| cg14727952 | 11 | 102218358 | GeneBody/5'UTR/1st exon   | <i>BIRC2</i>      | -4.081±0.394 | -4.365±0.352 | 1.50E-03 |
| cg11995303 | 11 | 102963161 | TSS1500                   | <i>DCUN1D5</i>    | -4.875±0.398 | -5.267±0.422 | 4.47E-05 |
| cg08469834 | 11 | 104839074 | GeneBody/1st intron       | <i>CASP4</i>      | -3.758±0.537 | -4.134±0.563 | 2.72E-03 |
| cg26289824 | 11 | 105944845 | TSS200                    | <i>KBTBD3</i>     | -4.835±0.329 | -5.338±0.462 | 3.91E-08 |
| cg09006267 | 11 | 107992538 | GeneBody/1st intron       | <i>ACAT1</i>      | -4.791±0.269 | -4.981±0.402 | 6.15E-03 |
| cg03165700 | 11 | 108093220 | GeneBody/1st intron       | <i>NPAT</i>       | -4.836±0.806 | -5.437±0.746 | 1.13E-03 |
| cg18457775 | 11 | 108093680 | GeneBody/5'UTR/1st exon   | <i>ATM</i>        | -5.373±0.65  | -5.814±0.64  | 3.22E-03 |
| cg22477592 | 11 | 108093921 | GeneBody/5'UTR/1st intron | <i>ATM</i>        | -6.326±0.629 | -6.924±0.739 | 1.00E-04 |
| cg24027342 | 11 | 108131609 | GeneBody                  | <i>ATM</i>        | 1.214±0.225  | 1.456±0.549  | 1.16E-03 |
| cg24936630 | 11 | 108535499 | TSS1500                   | <i>DDX10</i>      | -4.29±0.471  | -4.672±0.712 | 1.78E-03 |
| cg23352579 | 11 | 110166753 | GeneBody/5'UTR/1st intron | <i>RDX</i>        | -4.759±0.279 | -5.173±0.567 | 1.44E-06 |
| cg01015879 | 11 | 110167749 | TSS1500                   | <i>RDX</i>        | -4.067±0.415 | -4.374±0.573 | 3.20E-03 |
| cg10797910 | 11 | 111473380 | GeneBody/1st exon         | <i>SIK2</i>       | -5.496±0.537 | -6.001±0.627 | 1.12E-04 |
| cg22582569 | 11 | 111636425 | GeneBody/1st intron       | <i>PPP2R1B</i>    | -4.065±0.471 | -4.538±0.602 | 6.14E-05 |
| cg10219037 | 11 | 111750118 | GeneBody/1st exon         | <i>FDXACB1</i>    | -4.932±0.63  | -5.565±0.669 | 3.23E-05 |
| cg00327185 | 11 | 111896498 | GeneBody/1st intron       | <i>DLAT</i>       | -2.669±0.153 | -2.819±0.244 | 2.28E-04 |
| cg11909865 | 11 | 111944731 | GeneBody/5'UTR/1st exon   | <i>PIH1D2</i>     | -4.671±0.677 | -5.104±0.75  | 6.49E-03 |
| cg06910048 | 11 | 111945509 | GeneBody/5'UTR/1st exon   | <i>C11orf57</i>   | -4.474±0.217 | -4.652±0.472 | 7.73E-03 |
| cg17639290 | 11 | 111957166 | GeneBody/1st intron       | <i>TIMM8B</i>     | -4.408±0.51  | -4.747±0.68  | 7.17E-03 |
| cg03950669 | 11 | 111957582 | GeneBody/5'UTR/1st exon   | <i>SDHD</i>       | -5.742±0.601 | -6.154±0.624 | 3.16E-03 |
| cg05225390 | 11 | 113644407 | GeneBody/5'UTR/1st exon   | <i>ZW10</i>       | -5.506±0.499 | -5.833±0.517 | 4.76E-03 |
| cg01404197 | 11 | 113644652 | TSS200                    | <i>ZW10</i>       | -4.294±0.338 | -4.021±0.282 | 3.88E-04 |
| cg17048483 | 11 | 114271079 | GeneBody/5'UTR/1st exon   | <i>C11orf71</i>   | -4.636±0.324 | -5.062±0.441 | 7.71E-07 |
| cg15541315 | 11 | 114309932 | TSS200                    | <i>REXO2</i>      | -5.093±0.594 | -5.44±0.522  | 9.25E-03 |
| cg16222698 | 11 | 114310578 | GeneBody/1st intron       | <i>REXO2</i>      | -4.662±0.517 | -5.066±0.638 | 1.34E-03 |
| cg06418878 | 11 | 116643266 | GeneBody/1st intron       | <i>BUD13</i>      | -4.783±0.284 | -5.097±0.415 | 2.50E-05 |
| cg03856801 | 11 | 116709138 | TSS1500                   | <i>APOA1</i>      | 3.753±0.422  | 3.466±0.553  | 5.71E-03 |
| cg03805364 | 11 | 117015176 | GeneBody/5'UTR/1st intron | <i>PFAH1B2</i>    | -4.816±0.195 | -5.154±0.453 | 2.49E-07 |
| cg16822189 | 11 | 117187018 | TSS200                    | <i>BACE1</i>      | -5.335±0.662 | -5.966±0.646 | 5.93E-05 |
| cg23740844 | 11 | 118272104 | GeneBody/1st exon         | <i>ATP5L</i>      | -3.787±0.282 | -4.03±0.387  | 6.32E-04 |
| cg04910299 | 11 | 118306353 | TSS1500                   | <i>KMT2A</i>      | -4.133±0.352 | -4.397±0.546 | 4.15E-03 |
| cg23326785 | 11 | 118401071 | TSS1500                   | <i>TMEM25</i>     | -3.61±0.489  | -3.934±0.52  | 4.49E-03 |
| cg16332060 | 11 | 118436807 | TSS200                    | <i>IFT46</i>      | -4.26±0.538  | -4.707±0.707 | 8.06E-04 |
| cg11713029 | 11 | 118868622 | TSS1500                   | <i>CCDC84</i>     | -4.807±0.319 | -5.348±0.505 | 9.24E-09 |
| cg11054882 | 11 | 118889578 | TSS200                    | <i>MIR3656</i>    | -3.374±0.276 | -3.543±0.3   | 8.75E-03 |
| cg24687335 | 11 | 118901407 | GeneBody/5'UTR            | <i>SLC37A4</i>    | -5.726±0.524 | -6.192±0.606 | 2.32E-04 |
| cg07330718 | 11 | 118927777 | GeneBody/5'UTR/1st exon   | <i>HYOU1</i>      | -4.665±0.438 | -5.193±0.701 | 9.91E-06 |
| cg01959004 | 11 | 118928411 | TSS1500                   | <i>HYOU1</i>      | -5.05±0.727  | -5.601±0.774 | 1.24E-03 |
| cg26516941 | 11 | 118972455 | GeneBody/5'UTR/1st exon   | <i>DPAGT1</i>     | -4.683±0.217 | -4.943±0.251 | 2.39E-06 |

|            |    |           |                           |                     |              |              |          |
|------------|----|-----------|---------------------------|---------------------|--------------|--------------|----------|
| cg11676109 | 11 | 118992413 | GeneBody/5'UTR/1st intron | <i>HINFP</i>        | -5.327±0.445 | -5.637±0.384 | 2.03E-03 |
| cg26872475 | 11 | 119039430 | TSS200                    | <i>NLRX1</i>        | -4.081±0.293 | -4.32±0.372  | 8.76E-04 |
| cg04964702 | 11 | 119076556 | TSS1500                   | <i>CBL</i>          | -3.82±0.649  | -4.335±0.71  | 7.98E-04 |
| cg22223602 | 11 | 119077220 | GeneBody/1st exon         | <i>CBL</i>          | -4.726±0.398 | -5.061±0.474 | 5.03E-04 |
| cg23009046 | 11 | 119600595 | TSS1500                   | <i>PVRL1</i>        | -3.138±0.381 | -3.415±0.399 | 1.85E-03 |
| cg18567470 | 11 | 120208005 | GeneBody/1st intron       | <i>ARHGEF12</i>     | -3.779±0.417 | -4.1±0.48    | 1.26E-03 |
| cg13421924 | 11 | 121163141 | TSS1500                   | <i>SC5D</i>         | -4.395±0.484 | -4.754±0.593 | 2.18E-03 |
| cg13982661 | 11 | 121163497 | TSS200                    | <i>SC5D</i>         | -4.626±0.335 | -4.852±0.484 | 7.95E-03 |
| cg03694261 | 11 | 122753977 | GeneBody/5'UTR/1st intron | <i>C11orf63</i>     | -4.402±0.52  | -4.928±0.543 | 2.81E-05 |
| cg10448528 | 11 | 123612020 | GeneBody/5'UTR/1st intron | <i>ZNF202</i>       | -5.371±0.627 | -5.742±0.534 | 8.03E-03 |
| cg05236037 | 11 | 123612483 | TSS200                    | <i>ZNF202</i>       | -4.843±0.316 | -5.068±0.356 | 2.69E-03 |
| cg16612699 | 11 | 124311218 | TSS1500                   | <i>OR8B8</i>        | 1.751±0.641  | 1.277±0.814  | 2.47E-03 |
| cg18170080 | 11 | 124631981 | GeneBody/1st exon         | <i>ESAM</i>         | -3.439±0.436 | -3.73±0.311  | 2.44E-03 |
| cg03332970 | 11 | 124632552 | TSS1500                   | <i>ESAM</i>         | -4.901±0.644 | -5.469±0.629 | 1.74E-04 |
| cg20447773 | 11 | 124670426 | GeneBody/1st exon         | <i>LOC100507283</i> | -5.356±0.464 | -5.905±0.616 | 5.02E-06 |
| cg26606064 | 11 | 125439070 | TSS1500                   | <i>EI24</i>         | -1.372±0.479 | -0.832±0.563 | 6.99E-06 |
| cg05739825 | 11 | 125439882 | GeneBody/5'UTR/1st intron | <i>EI24</i>         | -4.426±0.304 | -4.812±0.45  | 2.39E-06 |
| cg06567423 | 11 | 125462867 | GeneBody/5'UTR/1st intron | <i>STT3A</i>        | -4.296±0.375 | -4.726±0.696 | 6.45E-05 |
| cg10377274 | 11 | 125616888 | GeneBody                  | <i>PATE1</i>        | 1.935±0.588  | 1.448±0.899  | 1.49E-03 |
| cg23743472 | 11 | 125649234 | TSS1500                   | <i>PATE2</i>        | 1.662±0.743  | 1.169±1.031  | 8.12E-03 |
| cg07747336 | 11 | 125649398 | TSS1500                   | <i>PATE2</i>        | 0.541±0.683  | 0.097±0.815  | 6.65E-03 |
| cg09544918 | 11 | 125933187 | GeneBody/5'UTR/1st exon   | <i>CDON</i>         | -4.435±0.37  | -4.711±0.555 | 3.88E-03 |
| cg19857537 | 11 | 126081181 | GeneBody/1st intron       | <i>RPUSD4</i>       | -4.189±0.282 | -4.414±0.35  | 1.05E-03 |
| cg14755009 | 11 | 126153305 | GeneBody/5'UTR/1st intron | <i>TIRAP</i>        | -5.302±0.349 | -5.58±0.482  | 1.48E-03 |
| cg11861730 | 11 | 128392683 | TSS1500                   | <i>ETS1</i>         | -4.135±0.399 | -4.397±0.451 | 5.33E-03 |
| cg15948326 | 11 | 128775691 | TSS200                    | <i>C11orf45</i>     | -4.434±0.284 | -4.741±0.478 | 8.09E-05 |
| cg21022435 | 11 | 129763918 | TSS1500                   | <i>NFRKB</i>        | 3.05±0.281   | 3.243±0.375  | 5.69E-03 |
| cg02323334 | 11 | 129872621 | GeneBody/1st exon         | <i>LINC00167</i>    | -5.582±0.436 | -5.978±0.577 | 2.78E-04 |
| cg13058581 | 11 | 129872885 | TSS200                    | <i>PRDM10</i>       | -4.439±0.416 | -4.806±0.534 | 3.58E-04 |
| cg00156216 | 11 | 129939849 | GeneBody/5'UTR/1st exon   | <i>APLP2</i>        | -4.974±0.615 | -5.535±0.676 | 1.50E-04 |
| cg19966618 | 11 | 134123407 | TSS200                    | <i>ACAD8</i>        | -4.26±0.317  | -4.582±0.487 | 1.20E-04 |
| cg11781389 | 11 | 134201462 | TSS1500                   | <i>GLB1L2</i>       | -3.867±0.553 | -4.223±0.736 | 9.27E-03 |
| cg11225935 | 12 | 498478    | TSS200                    | <i>CCDC77</i>       | -4.785±0.413 | -5.284±0.448 | 1.63E-06 |
| cg11065385 | 12 | 568798    | TSS1500                   | <i>B4GALNT3</i>     | -3.658±0.364 | -4.023±0.597 | 2.06E-04 |
| cg12425673 | 12 | 862975    | GeneBody/1st exon         | <i>WNK1</i>         | -4.521±0.449 | -4.912±0.442 | 2.10E-04 |
| cg15612927 | 12 | 1058210   | GeneBody/5'UTR/1st intron | <i>RAD52</i>        | -3.91±0.394  | -4.317±0.584 | 7.62E-05 |
| cg08197201 | 12 | 1099823   | TSS1500                   | <i>ERC1</i>         | -5.778±0.334 | -6.004±0.365 | 3.98E-03 |
| cg22151768 | 12 | 1702874   | GeneBody/1st exon         | <i>FBXL14</i>       | -5.749±0.591 | -6.141±0.71  | 5.73E-03 |
| cg27470406 | 12 | 1704156   | TSS1500                   | <i>FBXL14</i>       | -5.754±0.483 | -6.095±0.468 | 2.13E-03 |
| cg18776056 | 12 | 2904912   | GeneBody/1st intron       | <i>FKBP4</i>        | -4.903±0.717 | -5.478±0.544 | 3.78E-04 |
| cg22837289 | 12 | 2921745   | TSS200                    | <i>ITFG2</i>        | -4.487±0.444 | -4.75±0.415  | 8.94E-03 |
| cg09976774 | 12 | 2986037   | GeneBody/5'UTR/1st intron | <i>FOXM1</i>        | -4.06±0.236  | -4.237±0.392 | 5.21E-03 |
| cg00770871 | 12 | 2999840   | TSS200                    | <i>TULP3</i>        | -5.799±0.509 | -6.124±0.552 | 6.41E-03 |
| cg22016818 | 12 | 3000126   | GeneBody/1st exon         | <i>TULP3</i>        | -5.064±0.521 | -5.516±0.594 | 3.08E-04 |
| cg10187932 | 12 | 3982816   | TSS1500                   | <i>PARP11</i>       | -3.154±0.575 | -3.539±0.627 | 4.43E-03 |
| cg26989531 | 12 | 4383117   | GeneBody/5'UTR/1st exon   | <i>CCND2</i>        | -1.57±0.474  | -1.953±0.552 | 7.66E-04 |
| cg16310717 | 12 | 4383619   | GeneBody/1st intron       | <i>CCND2</i>        | -1.763±0.556 | -2.172±0.609 | 1.79E-03 |
| cg08069899 | 12 | 4383770   | GeneBody/1st intron       | <i>CCND2</i>        | -2.82±1.287  | -3.583±0.986 | 7.04E-03 |
| cg13801381 | 12 | 4384022   | GeneBody/1st intron       | <i>CCND2</i>        | -3.539±1.822 | -4.77±1.614  | 2.78E-03 |
| cg18124330 | 12 | 4430774   | GeneBody/1st intron       | <i>C12orf5</i>      | -4.585±0.304 | -4.974±0.46  | 2.37E-06 |
| cg21902327 | 12 | 4554786   | TSS200                    | <i>FGF6</i>         | 0.693±0.525  | 0.302±0.594  | 1.68E-03 |
| cg18796520 | 12 | 4758272   | GeneBody/5'UTR/1st exon   | <i>NDUFA9</i>       | -4.672±0.376 | -5.025±0.474 | 1.49E-04 |
| cg16004800 | 12 | 4758496   | GeneBody/1st intron       | <i>NDUFA9</i>       | -4.204±0.491 | -4.497±0.382 | 6.79E-03 |
| cg13255190 | 12 | 4829286   | TSS1500                   | <i>GALNT8</i>       | 0.296±0.352  | 0.029±0.423  | 1.61E-03 |
| cg11620873 | 12 | 6309515   | GeneBody/5'UTR/1st exon   | <i>CD9</i>          | -4.484±0.364 | -4.731±0.422 | 4.40E-03 |
| cg04880762 | 12 | 6580124   | TSS1500                   | <i>VAMP1</i>        | -5.168±0.491 | -5.521±0.502 | 1.91E-03 |
| cg23877831 | 12 | 6603428   | GeneBody/5'UTR/1st intron | <i>NCAPD2</i>       | -4.348±0.661 | -4.843±0.752 | 1.65E-03 |
| cg16579101 | 12 | 6677158   | GeneBody/5'UTR/1st intron | <i>NOP2</i>         | -4.776±0.733 | -5.414±0.565 | 1.37E-04 |
| cg03930474 | 12 | 6772637   | TSS1500                   | <i>ING4</i>         | -4.241±0.382 | -4.615±0.48  | 8.01E-05 |
| cg01856985 | 12 | 6798404   | GeneBody/5'UTR/1st exon   | <i>ZNF384</i>       | -4.875±0.368 | -5.123±0.391 | 3.91E-03 |
| cg23311549 | 12 | 6862849   | TSS1500                   | <i>MLF2</i>         | -4.366±0.27  | -4.711±0.377 | 1.60E-06 |
| cg23360251 | 12 | 6937593   | GeneBody/5'UTR/1st exon   | <i>LEPREL2</i>      | -4.224±0.812 | -4.828±0.778 | 1.22E-03 |
| cg15264303 | 12 | 7013902   | GeneBody/5'UTR/1st exon   | <i>LRRC23</i>       | -3.032±0.57  | -2.545±0.606 | 3.16E-04 |
| cg22475430 | 12 | 7033563   | TSS200                    | <i>ATN1</i>         | -4.519±0.49  | -4.829±0.458 | 5.29E-03 |
| cg26754448 | 12 | 7052799   | TSS1500                   | <i>C12orf57</i>     | -2.763±0.561 | -2.333±0.539 | 8.98E-04 |
| cg05170326 | 12 | 7125723   | GeneBody/1st exon         | <i>LPCAT3</i>       | -5.406±0.4   | -5.803±0.506 | 7.08E-05 |
| cg26021103 | 12 | 7126013   | TSS200                    | <i>LPCAT3</i>       | -4.925±0.308 | -5.234±0.533 | 2.71E-04 |
| cg16236875 | 12 | 7245112   | TSS200                    | <i>C1RL</i>         | -3.114±0.233 | -3.356±0.304 | 3.91E-05 |
| cg22593785 | 12 | 7261970   | TSS200                    | <i>C1RL</i>         | -4.567±0.437 | -4.956±0.559 | 3.32E-04 |
| cg08571203 | 12 | 8185931   | GeneBody/5'UTR/1st exon   | <i>FOXJ2</i>        | -5.129±0.345 | -5.46±0.513  | 2.23E-04 |
| cg14162076 | 12 | 8665092   | TSS1500                   | <i>CLEC4D</i>       | 1.773±0.76   | 1.272±0.803  | 4.70E-03 |
| cg12581035 | 12 | 9067477   | GeneBody/5'UTR/1st intron | <i>PHC1</i>         | -5.582±0.804 | -6.151±0.653 | 1.57E-03 |
| cg26520371 | 12 | 9102400   | TSS200                    | <i>M6PR</i>         | -4.465±0.217 | -4.66±0.259  | 2.31E-04 |
| cg08865050 | 12 | 9601258   | TSS1500                   | <i>DDX12P</i>       | -4.594±0.378 | -5.036±0.444 | 3.63E-06 |
| cg08752459 | 12 | 10022682  | TSS1500                   | <i>CLEC2B</i>       | -2.228±0.718 | -2.725±0.706 | 2.98E-03 |
| cg09565688 | 12 | 10161879  | TSS1500                   | <i>CLEC12B</i>      | 1.487±0.286  | 1.276±0.337  | 2.12E-03 |
| cg26066361 | 12 | 10282621  | GeneBody/1st exon         | <i>CLEC7A</i>       | 0.073±0.622  | -0.494±0.688 | 1.82E-04 |
| cg06915165 | 12 | 10364933  | TSS1500                   | <i>GABARAPL1</i>    | -4.595±0.379 | -4.883±0.458 | 1.63E-03 |
| cg11450001 | 12 | 10365596  | GeneBody/5'UTR/1st exon   | <i>GABARAPL1</i>    | -4.775±0.403 | -5.055±0.474 | 3.72E-03 |
| cg24401912 | 12 | 10826432  | GeneBody/5'UTR/1st intron | <i>STYK1</i>        | -4.127±0.316 | -4.474±0.344 | 8.86E-06 |
| cg03876622 | 12 | 10876230  | TSS1500                   | <i>YBX3</i>         | -2.661±0.419 | -2.382±0.581 | 7.67E-03 |
| cg14502651 | 12 | 11081604  | TSS1500                   | <i>PRH2</i>         | 2.515±0.386  | 2.775±0.457  | 4.79E-03 |
| cg25677688 | 12 | 11176386  | TSS1500                   | <i>TAS2R19</i>      | 2.246±0.454  | 1.853±0.476  | 2.53E-04 |
| cg27345534 | 12 | 11509583  | TSS1500                   | <i>PRB1</i>         | 0.149±0.594  | -0.261±0.678 | 3.91E-03 |
| cg01939597 | 12 | 11803199  | GeneBody/1st intron       | <i>ETV6</i>         | -5.201±0.331 | -5.411±0.324 | 5.60E-03 |
| cg03272031 | 12 | 12509922  | GeneBody/1st exon         | <i>LOH12CR2</i>     | -5.526±0.492 | -5.836±0.486 | 5.95E-03 |
| cg06700265 | 12 | 12715028  | GeneBody/5'UTR/1st intron | <i>DUSP16</i>       | -5.398±0.46  | -5.714±0.536 | 3.88E-03 |
| cg09819033 | 12 | 12764631  | TSS200                    | <i>CREBL2</i>       | -5.179±0.426 | -5.479±0.374 | 1.86E-03 |
| cg00261552 | 12 | 12764894  | GeneBody/5'UTR/1st exon   | <i>CREBL2</i>       | -4.459±0.396 | -4.756±0.509 | 2.25E-03 |
| cg08849126 | 12 | 13044370  | GeneBody/5'UTR/1st exon   | <i>GPRC5A</i>       | -4.003±0.308 | -4.288±0.406 | 2.22E-04 |
| cg26648592 | 12 | 13153907  | GeneBody/1st exon         | <i>HTR7P1</i>       | -4.539±0.399 | -4.923±0.44  | 6.91E-05 |
| cg11697652 | 12 | 14518872  | GeneBody/5'UTR/1st intron | <i>ATF7IP</i>       | -4.553±0.77  | -5.175±0.788 | 5.65E-04 |
| cg14341030 | 12 | 14956580  | GeneBody/5'UTR/1st exon   | <i>C12orf60</i>     | -5.284±0.566 | -5.626±0.55  | 8.08E-03 |
| cg19075838 | 12 | 15941986  | GeneBody/5'UTR/1st intron | <i>EPS8</i>         | -4.688±0.382 | -4.95±0.49   | 4.92E-03 |
| cg01868559 | 12 | 16034962  | TSS1500                   | <i>STRAP</i>        | -5.339±0.403 | -5.676±0.56  | 9.09E-04 |

|            |    |          |                           |            |              |              |          |
|------------|----|----------|---------------------------|------------|--------------|--------------|----------|
| cg05243815 | 12 | 16035684 | GeneBody/1st exon         | STRAP      | -5.556±0.375 | -5.889±0.469 | 2.98E-04 |
| cg24012034 | 12 | 22778485 | GeneBody/1st exon         | ETNK1      | -5.546±0.513 | -5.87±0.438  | 4.76E-03 |
| cg18394848 | 12 | 25403102 | GeneBody/5'UTR/1st intron | KRAS       | -4.575±0.379 | -4.872±0.466 | 1.24E-03 |
| cg00584022 | 12 | 25403167 | GeneBody/5'UTR/1st intron | KRAS       | -5.023±0.593 | -5.38±0.458  | 6.40E-03 |
| cg11276198 | 12 | 25404189 | TSS1500                   | KRAS       | -5.18±0.485  | -5.55±0.593  | 1.64E-03 |
| cg22946876 | 12 | 26111213 | TSS1500                   | RASSF8-AS1 | -4.261±0.437 | -4.707±0.512 | 3.40E-05 |
| cg03046445 | 12 | 26277826 | GeneBody/5'UTR/1st exon   | BHLHE41    | -3.621±0.674 | -4.024±0.633 | 8.39E-03 |
| cg19574623 | 12 | 26348512 | GeneBody/5'UTR/1st exon   | SSPN       | -2.314±0.392 | -2.654±0.296 | 1.47E-04 |
| cg24509668 | 12 | 26348529 | GeneBody/5'UTR/1st exon   | SSPN       | -2.395±0.457 | -2.655±0.262 | 7.89E-03 |
| cg25960567 | 12 | 26985181 | GeneBody/1st intron       | ITPR2      | -4.392±0.475 | -4.678±0.462 | 8.43E-03 |
| cg03966406 | 12 | 26985412 | GeneBody/1st intron       | ITPR2      | -4.235±0.261 | -4.555±0.359 | 3.21E-06 |
| cg02569086 | 12 | 26985672 | GeneBody/1st exon         | ITPR2      | -4.608±0.314 | -5.032±0.41  | 3.83E-07 |
| cg24082826 | 12 | 26985738 | GeneBody/5'UTR/1st exon   | ITPR2      | -4.629±0.277 | -4.928±0.373 | 2.51E-05 |
| cg05289701 | 12 | 27090805 | GeneBody/5'UTR/1st exon   | ASUN       | -3.834±0.215 | -4.065±0.303 | 3.27E-05 |
| cg17061853 | 12 | 27091905 | GeneBody/5'UTR/1st intron | FGFR1OP2   | -4.175±0.26  | -4.565±0.399 | 9.88E-08 |
| cg13236637 | 12 | 27175529 | GeneBody/1st exon         | MED21      | -5.089±0.747 | -5.671±0.802 | 9.36E-04 |
| cg06058319 | 12 | 27677138 | GeneBody/5'UTR/1st exon   | PPFIBP1    | -3.401±0.203 | -3.592±0.298 | 2.66E-04 |
| cg03176585 | 12 | 27863646 | TSS200                    | MRPS35     | -5.002±0.603 | -5.527±0.583 | 2.02E-04 |
| cg07289581 | 12 | 27864261 | GeneBody/1st intron       | MRPS35     | -4.475±0.24  | -4.841±0.451 | 3.72E-07 |
| cg09377899 | 12 | 31226606 | TSS200                    | DDX11      | -5.079±0.343 | -5.307±0.282 | 2.92E-03 |
| cg04600076 | 12 | 31478972 | GeneBody/5'UTR/1st exon   | FAM60A     | -4.119±0.274 | -4.441±0.397 | 8.67E-06 |
| cg11082575 | 12 | 31479096 | GeneBody/5'UTR/1st exon   | FAM60A     | -4.611±0.209 | -4.767±0.281 | 2.58E-03 |
| cg02342494 | 12 | 31812046 | TSS200                    | METTL20    | -3.476±0.594 | -3.921±0.692 | 1.73E-03 |
| cg08647727 | 12 | 31812705 | GeneBody/5'UTR/1st exon   | METTL20    | -3.447±0.432 | -3.888±0.493 | 3.15E-05 |
| cg09970396 | 12 | 32113004 | GeneBody/5'UTR/1st intron | KIAA1551   | -4.224±0.585 | -4.675±0.589 | 9.18E-04 |
| cg20180148 | 12 | 32832336 | GeneBody/1st exon         | DNM1L      | -5.038±0.394 | -5.531±0.508 | 1.57E-06 |
| cg20857455 | 12 | 39300142 | TSS1500                   | CPNE8      | -3.687±0.324 | -3.914±0.327 | 2.51E-03 |
| cg20352371 | 12 | 41831595 | GeneBody/5'UTR/1st exon   | PDZRN4     | 1.225±0.415  | 1.509±0.562  | 6.04E-03 |
| cg22188495 | 12 | 42984466 | TSS1500                   | PRICKLE1   | -4.08±0.669  | -4.499±0.592 | 5.42E-03 |
| cg23123694 | 12 | 46766543 | GeneBody/5'UTR/1st exon   | SLC38A2    | -5.43±0.448  | -5.826±0.656 | 5.93E-04 |
| cg00811081 | 12 | 48099724 | GeneBody/5'UTR/1st intron | RPAP3      | -4.133±0.564 | -4.501±0.673 | 6.47E-03 |
| cg09114799 | 12 | 48152515 | TSS1500                   | RAPGEF3    | -2.934±0.189 | -3.155±0.27  | 8.67E-06 |
| cg24608308 | 12 | 48152844 | GeneBody/5'UTR/1st exon   | RAPGEF3    | -5.235±0.329 | -5.541±0.371 | 1.14E-04 |
| cg09818732 | 12 | 48166716 | TSS1500                   | SLC48A1    | -4.872±0.597 | -5.298±0.802 | 4.11E-03 |
| cg12391174 | 12 | 48167505 | GeneBody/1st intron       | SLC48A1    | -4.703±0.442 | -5.006±0.526 | 4.23E-03 |
| cg06369854 | 12 | 48299313 | TSS1500                   | VDR        | -4.543±0.292 | -4.785±0.517 | 2.82E-03 |
| cg12629083 | 12 | 48499284 | TSS1500                   | PFKM       | -5.393±0.468 | -5.798±0.515 | 2.82E-04 |
| cg23069305 | 12 | 48500318 | TSS1500                   | SENP1      | -3.293±0.523 | -3.64±0.674  | 6.67E-03 |
| cg10200408 | 12 | 48551356 | GeneBody/5'UTR/1st exon   | ASB8       | -5.315±0.61  | -5.826±0.535 | 2.64E-04 |
| cg22103585 | 12 | 49110427 | GeneBody/1st exon         | CCNT1      | -5.364±0.338 | -5.738±0.457 | 1.68E-05 |
| cg24928378 | 12 | 49259415 | GeneBody/1st intron       | RND1       | -3.295±0.513 | -3.651±0.612 | 3.77E-03 |
| cg14636377 | 12 | 49463506 | GeneBody/1st intron       | RHEBL1     | -5.193±0.337 | -5.391±0.324 | 9.93E-03 |
| cg05919661 | 12 | 49504308 | GeneBody/1st exon         | LMBR1L     | -4.621±0.348 | -4.927±0.45  | 3.95E-04 |
| cg13005611 | 12 | 49525534 | TSS1500                   | TUBA1B     | -5.141±0.34  | -5.543±0.487 | 7.30E-06 |
| cg14802310 | 12 | 49582599 | GeneBody/1st intron       | TUBA1A     | -1.814±0.417 | -2.128±0.516 | 2.86E-03 |
| cg17420360 | 12 | 49740840 | TSS200                    | DNAJC22    | -4.497±0.319 | -4.758±0.456 | 1.28E-03 |
| cg05368762 | 12 | 50135785 | GeneBody/5'UTR/1st exon   | TMBIM6     | -5.051±0.302 | -5.324±0.453 | 4.91E-04 |
| cg19782075 | 12 | 50237049 | TSS200                    | BCDIN3D    | -3.552±0.556 | -3.956±0.588 | 1.87E-03 |
| cg11912049 | 12 | 50361401 | 0                         | 0          | -5.615±0.674 | -6.015±0.674 | 9.92E-03 |
| cg13615396 | 12 | 50418996 | GeneBody/5'UTR/1st intron | RACGAP1    | -4.687±0.644 | -5.087±0.768 | 9.52E-03 |
| cg18591973 | 12 | 50478751 | TSS1500                   | SMARCD1    | -5.066±0.573 | -5.51±0.676  | 1.26E-03 |
| cg01372605 | 12 | 50505957 | GeneBody/5'UTR/1st exon   | COX14      | -5.298±0.541 | -5.755±0.625 | 4.47E-04 |
| cg00973334 | 12 | 50561022 | GeneBody/1st exon         | CERS5      | -4.759±0.648 | -5.193±0.781 | 5.31E-03 |
| cg16619240 | 12 | 50677228 | GeneBody/5'UTR/1st exon   | LIMA1      | -5.462±0.499 | -5.799±0.529 | 3.76E-03 |
| cg12787624 | 12 | 50677281 | GeneBody/5'UTR/1st exon   | LIMA1      | -5.672±0.51  | -6.107±0.572 | 4.13E-04 |
| cg01322897 | 12 | 51442056 | TSS200                    | LETMD1     | -5.598±0.502 | -5.924±0.586 | 6.38E-03 |
| cg21686900 | 12 | 51632663 | GeneBody/5'UTR/1st exon   | DAZAP2     | -5.953±0.493 | -6.745±0.636 | 9.36E-09 |
| cg04752565 | 12 | 51664655 | TSS1500                   | SMAGP      | -3.049±0.575 | -3.47±0.756  | 3.04E-03 |
| cg09989134 | 12 | 52463648 | TSS200                    | C12orf44   | -5.719±0.496 | -6.072±0.526 | 2.28E-03 |
| cg23911972 | 12 | 52464081 | GeneBody/5'UTR/1st intron | C12orf44   | -5.697±0.494 | -6.102±0.385 | 3.01E-04 |
| cg13181284 | 12 | 52845687 | GeneBody/1st exon         | KRT6B      | 2.735±0.603  | 2.227±0.795  | 6.95E-04 |
| cg04254916 | 12 | 52914047 | GeneBody/1st exon         | KRT5       | 2.564±0.549  | 2.094±0.808  | 8.59E-04 |
| cg13928961 | 12 | 53012009 | GeneBody/1st exon         | KRT73      | 2.615±1.026  | 1.953±1.247  | 7.29E-03 |
| cg10624583 | 12 | 53440492 | TSS1500                   | TENC1      | -4.506±0.37  | -4.893±0.444 | 2.58E-05 |
| cg08567916 | 12 | 53473383 | TSS200                    | SPRYD3     | -5.464±0.575 | -5.817±0.611 | 8.20E-03 |
| cg01773854 | 12 | 53491219 | TSS1500                   | IGFBP6     | -3.415±0.292 | -3.615±0.368 | 4.85E-03 |
| cg08629913 | 12 | 53491633 | GeneBody/1st exon         | IGFBP6     | -4.868±0.418 | -5.315±0.54  | 2.36E-05 |
| cg22052955 | 12 | 53625898 | GeneBody/5'UTR/1st exon   | RARG       | -2.991±0.157 | -3.165±0.261 | 5.23E-05 |
| cg12835684 | 12 | 53645647 | TSS1500                   | MFSD5      | -3.637±0.259 | -3.905±0.338 | 4.24E-05 |
| cg05368089 | 12 | 53689374 | GeneBody/1st exon         | PFDN5      | -4.405±0.374 | -4.74±0.485  | 3.16E-04 |
| cg13510262 | 12 | 53774037 | GeneBody/5'UTR/1st exon   | SP1        | -3.134±0.194 | -3.361±0.274 | 8.14E-06 |
| cg02765045 | 12 | 53845774 | TSS200                    | PCBP2      | -5.581±0.361 | -5.98±0.459  | 1.38E-05 |
| cg08959992 | 12 | 53846247 | GeneBody/5'UTR/1st intron | PCBP2      | -3.585±0.28  | -3.841±0.32  | 1.57E-04 |
| cg14903309 | 12 | 53894418 | TSS1500                   | TARBP2     | -4.691±0.407 | -5.098±0.582 | 1.06E-04 |
| cg18748332 | 12 | 54020076 | GeneBody/5'UTR/1st exon   | ATF7       | -4.816±0.299 | -5.109±0.451 | 1.90E-04 |
| cg07992625 | 12 | 54020444 | TSS1500                   | ATF7       | -4.117±0.669 | -4.648±0.66  | 6.32E-04 |
| cg10186308 | 12 | 54121077 | GeneBody/5'UTR/1st intron | CALCOCO1   | -5.251±0.624 | -5.739±0.511 | 5.63E-04 |
| cg12263485 | 12 | 54673731 | GeneBody/5'UTR/1st intron | CBX5       | -3.666±0.492 | -3.996±0.512 | 3.90E-03 |
| cg05754589 | 12 | 54674412 | TSS200                    | HNRNPA1    | -4.278±0.654 | -4.777±0.664 | 1.04E-03 |
| cg14981132 | 12 | 54675468 | GeneBody                  | HNRNPA1P10 | -3.393±0.559 | -3.951±0.636 | 4.54E-05 |
| cg27205791 | 12 | 54719080 | GeneBody/1st intron       | COPZ1      | -5.25±0.484  | -5.537±0.448 | 8.76E-03 |
| cg04450876 | 12 | 54866945 | GeneBody/5'UTR/1st intron | GTSF1      | 2.594±0.494  | 2.21±0.863   | 4.77E-03 |
| cg17523380 | 12 | 54982643 | TSS200                    | PPP1R1A    | -4.331±0.756 | -4.778±0.743 | 9.77E-03 |
| cg16360444 | 12 | 56102181 | TSS1500                   | ITGA7      | -3.468±0.424 | -3.758±0.484 | 3.91E-03 |
| cg01929065 | 12 | 56122634 | GeneBody/5'UTR/1st exon   | CD63       | -5.662±0.45  | -6.055±0.468 | 2.28E-04 |
| cg27215108 | 12 | 56123223 | GeneBody/5'UTR/1st exon   | CD63       | -3.762±0.213 | -3.938±0.272 | 7.85E-04 |
| cg14657159 | 12 | 56211136 | GeneBody/1st intron       | SARNP      | -4.108±0.488 | -4.428±0.645 | 7.91E-03 |
| cg16660717 | 12 | 56211781 | TSS200                    | ORMDL2     | -5.159±0.443 | -5.469±0.502 | 3.15E-03 |
| cg13887370 | 12 | 56224128 | TSS1500                   | DNAJC14    | -4.754±0.318 | -5.193±0.4   | 2.15E-07 |
| cg00129774 | 12 | 56360414 | GeneBody/5'UTR/1st intron | PMEL       | -4.385±0.359 | -4.826±0.469 | 2.24E-06 |
| cg22781397 | 12 | 56360787 | GeneBody/5'UTR/1st exon   | CDK2       | -5.072±0.281 | -5.274±0.328 | 2.70E-03 |
| cg04108502 | 12 | 56360908 | GeneBody/1st exon         | CDK2       | -4.82±0.323  | -5.121±0.396 | 1.56E-04 |
| cg11206763 | 12 | 56521692 | TSS1500                   | ESYT1      | -4.793±0.306 | -5.2±0.425   | 7.04E-07 |
| cg21609430 | 12 | 56522453 | GeneBody/1st exon         | ESYT1      | -5.748±0.492 | -6.096±0.682 | 4.84E-03 |
| cg16237595 | 12 | 56615720 | TSS200                    | RNF41      | -5.037±0.472 | -5.49±0.692  | 1.78E-04 |

|             |    |           |                           |                 |              |              |          |
|-------------|----|-----------|---------------------------|-----------------|--------------|--------------|----------|
| cg05435853  | 12 | 56615825  | TSS200                    | <i>RNF41</i>    | -4.045±0.409 | -4.353±0.522 | 2.08E-03 |
| cg22632663  | 12 | 56615932  | TSS200                    | <i>RNF41</i>    | -2.383±0.137 | -2.491±0.214 | 2.72E-03 |
| cg03343942  | 12 | 56625109  | GeneBody                  | <i>SLC39A5</i>  | 1.025±0.61   | 0.555±0.794  | 1.73E-03 |
| cg21800439  | 12 | 56753886  | GeneBody/5'UTR/1st exon   | <i>STAT2</i>    | -5.022±0.639 | -5.543±0.713 | 6.24E-04 |
| cg05388361  | 12 | 56754238  | TSS1500                   | <i>STAT2</i>    | -5.41±0.585  | -5.902±0.613 | 3.63E-04 |
| cg00819696  | 12 | 56843016  | GeneBody/5'UTR/1st intron | <i>TIMELESS</i> | -5.606±0.61  | -6.158±0.634 | 1.40E-04 |
| cg15536242  | 12 | 56848590  | TSS200                    | <i>MIP</i>      | 1.02±0.307   | 1.225±0.325  | 5.31E-03 |
| cg16523471  | 12 | 56862146  | TSS200                    | <i>SPRYD4</i>   | -3.475±0.502 | -3.818±0.631 | 4.92E-03 |
| cg12264551  | 12 | 56862370  | GeneBody/5'UTR/1st exon   | <i>SPRYD4</i>   | -5.851±0.604 | -6.296±0.689 | 1.97E-03 |
| cg25683012  | 12 | 57030113  | GeneBody/5'UTR/1st exon   | <i>BAZ2A</i>    | -5.453±0.389 | -5.713±0.372 | 3.41E-03 |
| cg14634319  | 12 | 57030450  | TSS1500                   | <i>BAZ2A</i>    | -4.093±0.294 | -4.375±0.356 | 9.48E-05 |
| cg17616707  | 12 | 57039822  | GeneBody/5'UTR/1st exon   | <i>ATP5B</i>    | -4.804±0.244 | -5.188±0.412 | 6.82E-08 |
| cg19847271  | 12 | 57146332  | TSS200                    | <i>PRIM1</i>    | -4.842±0.568 | -5.273±0.62  | 1.28E-03 |
| cg21922731  | 12 | 57157130  | GeneBody/5'UTR/1st exon   | <i>HSD17B6</i>  | -1.336±0.619 | -1.713±0.633 | 8.24E-03 |
| cg17639059  | 12 | 57483108  | GeneBody/1st exon         | <i>NAB2</i>     | -5.471±0.559 | -5.913±0.598 | 7.78E-04 |
| cg01063813  | 12 | 57504948  | GeneBody/1st exon         | <i>STAT6</i>    | -3.488±0.592 | -3.906±0.599 | 2.29E-03 |
| cg20779414  | 12 | 57505882  | TSS1500                   | <i>STAT6</i>    | -4.668±0.322 | -4.884±0.316 | 3.49E-03 |
| cg11468462  | 12 | 57610686  | GeneBody/5'UTR/1st exon   | <i>NXPH4</i>    | -4.779±0.405 | -5.111±0.566 | 1.19E-03 |
| cg09215553  | 12 | 57623421  | GeneBody/1st exon         | <i>SHMT2</i>    | -4.434±0.367 | -4.725±0.499 | 1.50E-03 |
| cg23240961  | 12 | 57634410  | GeneBody/5'UTR/1st intron | <i>NDUFA4L2</i> | -5.931±0.669 | -6.664±0.719 | 8.68E-06 |
| cg21878918  | 12 | 57634762  | TSS1500                   | <i>NDUFA4L2</i> | -4.225±0.464 | -4.562±0.566 | 2.62E-03 |
| cg1660687   | 12 | 57853396  | TSS1500                   | <i>GLI1</i>     | -4.548±0.249 | -4.76±0.46   | 2.60E-03 |
| cg15021531  | 12 | 57913928  | GeneBody/5'UTR/1st intron | <i>DDIT3</i>    | -4.171±0.234 | -4.404±0.381 | 2.17E-04 |
| cg25133016  | 12 | 57984719  | TSS1500                   | <i>PIP4K2C</i>  | -3.395±0.359 | -3.647±0.583 | 8.48E-03 |
| cg14789804  | 12 | 58087958  | GeneBody/1st exon         | <i>OS9</i>      | -4.536±0.329 | -4.806±0.39  | 6.75E-04 |
| cg222199080 | 12 | 58135833  | GeneBody/1st exon         | <i>AGAP2</i>    | -2.001±0.877 | -2.528±0.803 | 7.79E-03 |
| cg10018778  | 12 | 58138402  | TSS1500                   | <i>TSPAN31</i>  | -4.999±0.452 | -5.383±0.675 | 9.87E-04 |
| cg09504352  | 12 | 58146286  | TSS200                    | <i>CDK4</i>     | -5.556±0.332 | -5.966±0.427 | 2.00E-06 |
| cg04905829  | 12 | 58160911  | GeneBody/5'UTR/1st exon   | <i>CYP27B1</i>  | -1.336±0.486 | -1.672±0.729 | 7.44E-03 |
| cg23970338  | 12 | 58176483  | TSS200                    | <i>TSFM</i>     | -4.168±0.341 | -4.669±0.575 | 3.07E-07 |
| cg11762629  | 12 | 58240176  | GeneBody/1st exon         | <i>CTDSP2</i>   | -4.167±0.351 | -4.431±0.508 | 3.15E-03 |
| cg02460120  | 12 | 62653836  | TSS1500                   | <i>USP15</i>    | -4.844±0.49  | -5.264±0.614 | 4.78E-04 |
| cg12304441  | 12 | 62653866  | TSS1500                   | <i>USP15</i>    | -4.467±0.36  | -4.707±0.476 | 6.81E-03 |
| cg12823748  | 12 | 62654080  | TSS200                    | <i>USP15</i>    | -3.533±0.267 | -3.719±0.372 | 5.46E-03 |
| cg18915437  | 12 | 62654245  | GeneBody/1st exon         | <i>USP15</i>    | -5.994±0.539 | -6.616±0.602 | 3.96E-06 |
| cg21137706  | 12 | 64173304  | TSS1500                   | <i>TMEM5</i>    | -4.659±0.434 | -5.102±0.585 | 5.99E-05 |
| cg21796825  | 12 | 64173751  | TSS200                    | <i>TMEM5</i>    | -5.915±0.582 | -6.423±0.603 | 2.24E-04 |
| cg07973246  | 12 | 64238719  | GeneBody/1st intron       | <i>SRGAP1</i>   | -4.182±0.375 | -4.438±0.531 | 6.92E-03 |
| cg04466273  | 12 | 64845556  | TSS1500                   | <i>TBK1</i>     | -4.979±0.286 | -5.368±0.473 | 1.33E-06 |
| cg21722680  | 12 | 64846210  | GeneBody/5'UTR/1st intron | <i>TBK1</i>     | -5.092±0.504 | -5.462±0.563 | 1.94E-03 |
| cg07915282  | 12 | 65003120  | TSS1500                   | <i>RASSF3</i>   | -3.404±0.741 | -3.848±0.654 | 7.46E-03 |
| cg12157010  | 12 | 65004958  | GeneBody/1st intron       | <i>RASSF3</i>   | -4.36±0.321  | -4.771±0.425 | 1.15E-06 |
| cg21935292  | 12 | 65152931  | GeneBody/1st exon         | <i>GNS</i>      | -5.276±0.374 | -5.586±0.406 | 4.81E-04 |
| cg03217102  | 12 | 65563486  | GeneBody/1st exon         | <i>LEMD3</i>    | -3.086±0.18  | -3.291±0.266 | 1.61E-05 |
| cg10654016  | 12 | 66524411  | GeneBody/5'UTR/1st intron | <i>LLPH</i>     | -3.913±0.413 | -4.453±0.561 | 8.53E-07 |
| cg14281160  | 12 | 66524943  | TSS1500                   | <i>LLPH</i>     | -3.864±0.447 | -4.198±0.543 | 2.00E-03 |
| cg04982748  | 12 | 66696283  | TSS200                    | <i>HELB</i>     | -3.388±0.203 | -3.624±0.281 | 8.72E-06 |
| cg11160386  | 12 | 68725932  | GeneBody/1st intron       | <i>MDM1</i>     | -4.586±0.297 | -4.881±0.504 | 2.74E-04 |
| cg21211608  | 12 | 69004270  | TSS1500                   | <i>RAP1B</i>    | -5.363±0.383 | -5.699±0.421 | 2.43E-04 |
| cg15092544  | 12 | 69004670  | GeneBody/5'UTR/1st exon   | <i>RAP1B</i>    | -5.959±0.492 | -6.616±0.736 | 9.40E-07 |
| cg24635866  | 12 | 69979163  | TSS200                    | <i>CCT2</i>     | -5.847±0.486 | -6.202±0.608 | 2.70E-03 |
| cg10464585  | 12 | 70636491  | TSS1500                   | <i>CNOT2</i>    | -2.6±0.411   | -2.271±0.628 | 2.08E-03 |
| cg16482226  | 12 | 70637792  | GeneBody/5'UTR/1st exon   | <i>CNOT2</i>    | -4.665±0.348 | -5.031±0.451 | 3.08E-05 |
| cg23096553  | 12 | 70759870  | TSS200                    | <i>KCNMB4</i>   | -5.494±0.402 | -5.901±0.791 | 5.45E-04 |
| cg24373760  | 12 | 71834237  | GeneBody/1st intron       | <i>LGR5</i>     | -3.936±0.671 | -4.474±0.802 | 9.05E-04 |
| cg16909364  | 12 | 72057977  | TSS1500                   | <i>ZFC3H1</i>   | -4.849±0.523 | -5.167±0.568 | 9.26E-03 |
| cg26577178  | 12 | 75905604  | TSS200                    | <i>KRR1</i>     | -4.181±0.399 | -4.505±0.629 | 2.10E-03 |
| cg02947222  | 12 | 76425514  | GeneBody/1st exon         | <i>PHLDA1</i>   | -5.369±0.424 | -5.837±0.65  | 3.28E-05 |
| cg20095338  | 12 | 76478402  | GeneBody/5'UTR/1st exon   | <i>NAP1L1</i>   | -3.156±0.226 | -3.346±0.364 | 1.55E-03 |
| cg10027114  | 12 | 76742097  | GeneBody/1st exon         | <i>BBS10</i>    | -4.804±0.377 | -5.099±0.56  | 2.40E-03 |
| cg13159566  | 12 | 82752887  | TSS1500                   | <i>CCDC59</i>   | -3.196±0.375 | -3.519±0.47  | 4.48E-04 |
| cg07520161  | 12 | 88535980  | GeneBody/5'UTR/1st exon   | <i>CEP290</i>   | -4.324±0.293 | -4.726±0.454 | 7.38E-07 |
| cg18081750  | 12 | 89746418  | TSS200                    | <i>DUSP6</i>    | -4.809±0.355 | -5.079±0.422 | 1.57E-03 |
| cg09848198  | 12 | 93323497  | TSS1500                   | <i>EEA1</i>     | -4.38±0.278  | -4.714±0.389 | 4.75E-06 |
| cg18116253  | 12 | 93836291  | TSS1500                   | <i>UBE2N</i>    | -4.162±0.363 | -4.49±0.466  | 2.65E-04 |
| cg15125424  | 12 | 93963354  | TSS1500                   | <i>SOCS2</i>    | -3.518±0.379 | -3.777±0.533 | 6.82E-03 |
| cg19007602  | 12 | 93963603  | GeneBody/5'UTR/1st exon   | <i>SOCS2</i>    | -4.689±0.509 | -5.004±0.474 | 6.37E-03 |
| cg04117338  | 12 | 94071150  | GeneBody/5'UTR/1st exon   | <i>CRADD</i>    | -5.14±0.607  | -5.619±0.75  | 1.17E-03 |
| cg01065920  | 12 | 95397325  | GeneBody/1st intron       | <i>NDUFA12</i>  | -5.014±0.491 | -5.326±0.502 | 6.05E-03 |
| cg19824362  | 12 | 95467522  | TSS200                    | <i>NR2C1</i>    | -5.32±0.393  | -5.641±0.553 | 1.23E-03 |
| cg16909124  | 12 | 95467524  | TSS200                    | <i>NR2C1</i>    | -5.601±0.577 | -6.104±0.591 | 2.22E-04 |
| cg19510484  | 12 | 95868044  | GeneBody/1st exon         | <i>METAP2</i>   | -4.11±0.473  | -4.501±0.552 | 5.87E-04 |
| cg18627852  | 12 | 96252602  | TSS200                    | <i>SNRPF</i>    | -5.479±0.425 | -5.879±0.476 | 9.71E-05 |
| cg05780616  | 12 | 96252764  | GeneBody/5'UTR/1st exon   | <i>SNRPF</i>    | -4.706±0.277 | -4.876±0.293 | 8.28E-03 |
| cg26240353  | 12 | 96429271  | GeneBody/1st exon         | <i>LTA4H</i>    | -4.976±0.375 | -5.368±0.571 | 7.50E-05 |
| cg12888961  | 12 | 96794220  | GeneBody/5'UTR/1st exon   | <i>CDK17</i>    | -4.325±0.338 | -4.601±0.535 | 1.94E-03 |
| cg07549630  | 12 | 97300822  | TSS200                    | <i>NEDD1</i>    | -5.344±0.398 | -5.808±0.62  | 1.45E-05 |
| cg23264519  | 12 | 98908939  | TSS1500                   | <i>TMPO</i>     | -4.41±0.551  | -4.777±0.553 | 3.90E-03 |
| cg11625178  | 12 | 98909434  | GeneBody/5'UTR/1st exon   | <i>TMPO</i>     | -5.271±0.573 | -5.605±0.467 | 8.56E-03 |
| cg19196182  | 12 | 99038046  | GeneBody/1st intron       | <i>IKBIP</i>    | -4.17±0.476  | -4.512±0.685 | 4.78E-03 |
| cg07865790  | 12 | 99038290  | GeneBody/1st intron       | <i>IKBIP</i>    | -5.278±0.434 | -5.689±0.457 | 7.62E-05 |
| cg14872956  | 12 | 99039015  | TSS200                    | <i>APAF1</i>    | -5.377±0.52  | -5.729±0.516 | 3.29E-03 |
| cg27476329  | 12 | 100566955 | GeneBody/1st exon         | <i>GOLGA2P5</i> | 1.627±0.213  | 1.803±0.317  | 1.30E-03 |
| cg09464487  | 12 | 100593423 | TSS1500                   | <i>ACTR6</i>    | -5.151±0.346 | -5.518±0.48  | 3.78E-05 |
| cg25516544  | 12 | 100660816 | GeneBody/1st exon         | <i>DEPDC4</i>   | -5.905±0.512 | -6.249±0.525 | 3.65E-03 |
| cg20866788  | 12 | 101802016 | TSS1500                   | <i>ARL1</i>     | -4.523±0.463 | -4.812±0.451 | 6.46E-03 |
| cg10935064  | 12 | 102133347 | TSS200                    | <i>SYCP3</i>    | 4.974±0.383  | 5.275±0.416  | 8.45E-04 |
| cg06554542  | 12 | 102224375 | GeneBody/1st exon         | <i>GNPTAB</i>   | -4.878±0.257 | -5.223±0.446 | 2.38E-06 |
| cg02806658  | 12 | 102513592 | TSS1500                   | <i>PARPBP</i>   | -4.694±0.327 | -5.005±0.493 | 2.74E-04 |
| cg05727959  | 12 | 102514075 | GeneBody/5'UTR/1st intron | <i>PARPBP</i>   | -5.629±0.35  | -5.871±0.385 | 3.18E-03 |
| cg22699062  | 12 | 104324366 | GeneBody/1st intron       | <i>HSP90B1</i>  | -4.021±0.394 | -4.31±0.471  | 2.30E-03 |
| cg11207379  | 12 | 104359415 | TSS200                    | <i>TDG</i>      | -5.231±0.479 | -5.557±0.588 | 4.81E-03 |
| cg02246665  | 12 | 104458006 | TSS1500                   | <i>HCFC2</i>    | -4.955±0.328 | -5.256±0.477 | 3.72E-04 |
| cg21226225  | 12 | 104680742 | GeneBody/5'UTR/1st exon   | <i>TXNRD1</i>   | -2.323±0.466 | -1.995±0.438 | 2.05E-03 |
| cg21768899  | 12 | 105724426 | GeneBody/5'UTR/1st exon   | <i>C12orf75</i> | -5.422±1.056 | -6.107±1     | 4.43E-03 |

|            |    |           |                           |                     |              |              |          |
|------------|----|-----------|---------------------------|---------------------|--------------|--------------|----------|
| cg02686769 | 12 | 106695932 | TSS1500                   | <i>TCP11L2</i>      | -4.786±0.409 | -5.042±0.418 | 6.76E-03 |
| cg26979339 | 12 | 107168153 | TSS1500                   | <i>RIC8B</i>        | -4.773±0.407 | -5.053±0.425 | 3.18E-03 |
| cg17677842 | 12 | 108154370 | GeneBody/5'UTR            | <i>PRDM4</i>        | -5.183±0.519 | -5.681±0.762 | 2.14E-04 |
| cg24642516 | 12 | 108908742 | TSS1500                   | <i>FICD</i>         | -5.393±0.373 | -5.82±0.647  | 3.91E-05 |
| cg16054422 | 12 | 108954439 | GeneBody/1st intron       | <i>SART3</i>        | -4.558±0.439 | -4.979±0.566 | 1.19E-04 |
| cg25149927 | 12 | 109250901 | GeneBody/1st intron       | <i>SSH1</i>         | -3.56±0.627  | -4.092±0.665 | 3.39E-04 |
| cg22801690 | 12 | 109274241 | GeneBody/5'UTR/1st intron | <i>DAO</i>          | 1.435±0.512  | 1.121±0.573  | 9.03E-03 |
| cg22449795 | 12 | 109490720 | GeneBody/1st intron       | <i>USP30</i>        | -4.932±0.24  | -5.287±0.385 | 2.02E-07 |
| cg10966500 | 12 | 110338339 | GeneBody/5'UTR/1st exon   | <i>TCHP</i>         | -5.144±0.523 | -5.476±0.512 | 5.49E-03 |
| cg09391966 | 12 | 110433837 | GeneBody/1st intron       | <i>GIT2</i>         | -5.273±0.441 | -5.573±0.537 | 4.67E-03 |
| cg12333095 | 12 | 110437035 | TSS200                    | <i>ANKRD13A</i>     | -4.639±0.367 | -5.01±0.435  | 4.15E-05 |
| cg13928594 | 12 | 110562699 | GeneBody/5'UTR/1st intron | <i>IFT81</i>        | -4.53±0.31   | -4.749±0.295 | 2.03E-03 |
| cg18825539 | 12 | 110720126 | GeneBody/1st intron       | <i>ATP2A2</i>       | -4.952±0.512 | -5.342±0.487 | 9.38E-04 |
| cg20597908 | 12 | 110888290 | TSS200                    | <i>ARPC3</i>        | -4.927±0.394 | -5.181±0.489 | 7.49E-03 |
| cg19020694 | 12 | 110906055 | GeneBody/5'UTR/1st exon   | <i>GNP3</i>         | -4.675±0.462 | -5.126±0.685 | 1.74E-04 |
| cg01137198 | 12 | 111020449 | GeneBody/1st intron       | <i>PPTC7</i>        | -5.761±0.503 | -6.222±0.537 | 1.27E-04 |
| cg10361696 | 12 | 111806472 | GeneBody/5'UTR/1st intron | <i>FAM109A</i>      | -3.389±0.251 | -3.596±0.306 | 6.75E-04 |
| cg18108237 | 12 | 112123684 | GeneBody/5'UTR/1st exon   | <i>BRAP</i>         | -5.292±0.48  | -5.676±0.593 | 1.01E-03 |
| cg10449070 | 12 | 112204506 | TSS200                    | <i>ALDH2</i>        | -4.758±0.267 | -5.192±0.579 | 4.18E-07 |
| cg08367026 | 12 | 112280616 | GeneBody/1st exon         | <i>VAPKAPK5-AS1</i> | -4.968±0.433 | -5.295±0.491 | 1.48E-03 |
| cg22778180 | 12 | 112280887 | TSS200                    | <i>VAPKAPK5-AS1</i> | -4.467±0.4   | -4.786±0.659 | 2.97E-03 |
| cg00405070 | 12 | 112450647 | GeneBody/5'UTR/1st intron | <i>TMEM116</i>      | -4.748±0.482 | -5.064±0.567 | 5.94E-03 |
| cg19154173 | 12 | 112451600 | GeneBody/1st intron       | <i>ERP29</i>        | -5.265±0.356 | -5.537±0.378 | 1.10E-03 |
| cg13342120 | 12 | 112563444 | GeneBody/5'UTR/1st exon   | <i>TRAFD1</i>       | -4.083±0.254 | -4.316±0.252 | 1.01E-04 |
| cg13296563 | 12 | 112847257 | GeneBody/5'UTR/1st intron | <i>RPL6</i>         | -5.057±0.572 | -5.419±0.522 | 5.09E-03 |
| cg15120925 | 12 | 113573809 | GeneBody/5'UTR/1st intron | <i>RASAL1</i>       | -2.9±0.269   | -3.103±0.425 | 4.33E-03 |
| cg04261665 | 12 | 113622579 | GeneBody/1st intron       | <i>DDX54</i>        | -4.462±0.416 | -4.748±0.44  | 3.16E-03 |
| cg13393195 | 12 | 113659153 | TSS200                    | <i>TPCN1</i>        | -4.741±0.302 | -5.112±0.37  | 1.80E-06 |
| cg07125991 | 12 | 113796636 | GeneBody/1st exon         | <i>PLBD2</i>        | -5.193±0.323 | -5.461±0.576 | 2.84E-03 |
| cg05149586 | 12 | 113859869 | TSS1500                   | <i>SDSL</i>         | -2.213±0.261 | -2.44±0.323  | 3.20E-03 |
| cg08332868 | 12 | 114404181 | TSS200                    | <i>RBM19</i>        | -4.918±0.377 | -5.336±0.526 | 1.94E-05 |
| cg20057066 | 12 | 116971500 | GeneBody/1st intron       | <i>LINC00173</i>    | -4.328±0.438 | -4.609±0.466 | 6.04E-03 |
| cg04853383 | 12 | 117176053 | TSS200                    | <i>RNF2</i>         | -5.141±0.323 | -5.453±0.475 | 2.02E-04 |
| cg18222235 | 12 | 117348646 | TSS200                    | <i>FBXW8</i>        | -4.067±0.512 | -4.523±0.586 | 2.32E-04 |
| cg26035463 | 12 | 117627651 | GeneBody/1st intron       | <i>FBXO21</i>       | -4.15±0.274  | -4.405±0.35  | 1.78E-04 |
| cg05227963 | 12 | 118454258 | TSS1500                   | <i>RFC5</i>         | -4.22±0.256  | -4.443±0.262 | 2.25E-04 |
| cg18627459 | 12 | 118454580 | GeneBody/5'UTR/1st exon   | <i>RFC5</i>         | -5.196±0.532 | -5.591±0.595 | 1.71E-03 |
| cg06887167 | 12 | 120314679 | GeneBody/5'UTR/1st intron | <i>CIT</i>          | -4.947±0.325 | -5.343±0.527 | 8.81E-06 |
| cg25499017 | 12 | 120315162 | TSS200                    | <i>CIT</i>          | -5.907±0.555 | -6.39±0.707  | 4.32E-04 |
| cg13752005 | 12 | 120426784 | TSS1500                   | <i>CCDC64</i>       | -4.376±0.327 | -4.698±0.65  | 8.11E-04 |
| cg12179044 | 12 | 120632364 | GeneBody/1st intron       | <i>GCN1L1</i>       | -4.95±0.428  | -5.235±0.641 | 9.75E-03 |
| cg21123573 | 12 | 120740055 | TSS200                    | <i>SIRT4</i>        | -3.204±0.557 | -3.611±0.693 | 3.51E-03 |
| cg20559561 | 12 | 120972173 | GeneBody/5'UTR/1st exon   | <i>RNF10</i>        | -5.561±0.379 | -5.936±0.547 | 1.29E-04 |
| cg25515063 | 12 | 121019412 | TSS1500                   | <i>POP5</i>         | -5.152±0.461 | -5.436±0.405 | 6.12E-03 |
| cg03543403 | 12 | 122710630 | TSS1500                   | <i>DIABLO</i>       | -5.149±0.339 | -5.619±0.598 | 1.51E-06 |
| cg02995130 | 12 | 122906407 | GeneBody/5'UTR/1st intron | <i>CLIP1</i>        | -5.246±0.395 | -5.509±0.468 | 5.40E-03 |
| cg11064206 | 12 | 123459532 | GeneBody/5'UTR/1st exon   | <i>OGFOD2</i>       | -4.906±0.314 | -5.29±0.417  | 2.72E-06 |
| cg03923464 | 12 | 123460173 | GeneBody/5'UTR/1st intron | <i>OGFOD2</i>       | -3.907±0.231 | -3.772±0.206 | 9.30E-03 |
| cg24580526 | 12 | 123756739 | TSS200                    | <i>CDK2AP1</i>      | -4.448±0.435 | -4.763±0.602 | 3.90E-03 |
| cg01954353 | 12 | 123920983 | GeneBody/5'UTR/1st exon   | <i>RILPL2</i>       | -3.676±0.315 | -3.934±0.68  | 7.59E-03 |
| cg06378357 | 12 | 123942579 | TSS200                    | <i>SNRNP35</i>      | -3.924±0.326 | -4.217±0.418 | 2.93E-04 |
| cg06606198 | 12 | 124086727 | GeneBody/1st exon         | <i>DDX55</i>        | -5.58±0.556  | -5.984±0.583 | 1.86E-03 |
| cg21419475 | 12 | 124118052 | TSS1500                   | <i>GTF2H3</i>       | -4.708±0.418 | -5.016±0.346 | 1.07E-03 |
| cg26493932 | 12 | 124456591 | GeneBody/5'UTR/1st intron | <i>CCDC92</i>       | -5.08±0.557  | -5.548±0.597 | 3.85E-04 |
| cg02250992 | 12 | 125348168 | GeneBody/1st exon         | <i>SCARB1</i>       | -5.52±0.626  | -6.175±1.119 | 1.95E-04 |
| cg02316718 | 12 | 125399409 | GeneBody/5'UTR/1st exon   | <i>UBC</i>          | -5.889±0.399 | -6.199±0.452 | 1.10E-03 |
| cg03455874 | 12 | 125478229 | GeneBody/5'UTR/1st exon   | <i>BR13BP</i>       | -4.235±0.597 | -4.607±0.606 | 6.84E-03 |
| cg05303448 | 12 | 125549535 | TSS1500                   | <i>AACS</i>         | -1.633±0.522 | -2.073±0.759 | 1.11E-03 |
| cg02501984 | 12 | 133263946 | TSS200                    | <i>POLE</i>         | -5.981±0.671 | -6.458±0.665 | 2.03E-03 |
| cg20785344 | 12 | 133287770 | GeneBody/1st intron       | <i>PGAM5</i>        | -5.067±0.4   | -5.492±0.64  | 7.85E-05 |
| cg26609691 | 12 | 133430226 | GeneBody                  | <i>CHFR</i>         | 5.283±0.301  | 5.55±0.357   | 2.59E-04 |
| cg23653008 | 12 | 133464419 | TSS1500                   | <i>CHFR</i>         | -4.336±0.287 | -4.643±0.611 | 4.55E-04 |
| cg27363310 | 12 | 133613924 | GeneBody/5'UTR/1st exon   | <i>ZNF84</i>        | -4.328±0.343 | -4.535±0.309 | 7.46E-03 |
| cg11754676 | 12 | 133706789 | GeneBody/5'UTR/1st intron | <i>ZNF891</i>       | -5.237±0.411 | -5.498±0.531 | 9.79E-03 |
| cg22675150 | 13 | 19755900  | GeneBody/5'UTR/1st exon   | <i>TUBA3C</i>       | 2.003±0.285  | 1.774±0.378  | 1.18E-03 |
| cg27005181 | 13 | 20208413  | GeneBody/1st intron       | <i>MPHOSPH8</i>     | -5.231±0.559 | -5.584±0.588 | 6.59E-03 |
| cg18710692 | 13 | 20437712  | GeneBody/5'UTR/1st exon   | <i>ZMYM5</i>        | -4.844±0.491 | -5.418±0.767 | 1.47E-05 |
| cg26767761 | 13 | 20533755  | GeneBody/5'UTR/1st intron | <i>ZMYM2</i>        | -5.384±0.521 | -5.822±0.55  | 3.68E-04 |
| cg26790132 | 13 | 21277505  | GeneBody/5'UTR/1st exon   | <i>IL17D</i>        | -4.226±0.272 | -4.524±0.431 | 4.58E-05 |
| cg05395995 | 13 | 21348183  | TSS200                    | <i>N6AMT2</i>       | -4.769±0.573 | -5.217±0.616 | 8.96E-04 |
| cg02147791 | 13 | 21714429  | TSS1500                   | <i>SAP18</i>        | -2.603±0.533 | -2.116±0.713 | 2.73E-04 |
| cg25495394 | 13 | 21714725  | GeneBody/1st exon         | <i>SAP18</i>        | -4.818±0.335 | -5.138±0.618 | 7.34E-04 |
| cg07827038 | 13 | 21750347  | TSS200                    | <i>MRP63</i>        | -4.861±0.428 | -5.336±0.52  | 1.02E-05 |
| cg00432979 | 13 | 21750473  | GeneBody/5'UTR/1st exon   | <i>MRP63</i>        | -5.158±0.561 | -5.518±0.61  | 6.05E-03 |
| cg13557178 | 13 | 22178108  | GeneBody/1st exon         | <i>MICU2</i>        | -5.244±0.38  | -5.556±0.436 | 6.14E-04 |
| cg08163803 | 13 | 22178600  | TSS1500                   | <i>MICU2</i>        | -3.505±0.532 | -3.848±0.584 | 5.93E-03 |
| cg09546332 | 13 | 25086777  | GeneBody/5'UTR/1st intron | <i>PARP4</i>        | -5.069±0.394 | -5.447±0.516 | 1.32E-04 |
| cg02943497 | 13 | 25087090  | TSS200                    | <i>PARP4</i>        | -3.3±0.239   | -3.505±0.303 | 4.82E-04 |
| cg17806989 | 13 | 25338287  | TSS200                    | <i>RNF17</i>        | 3.57±0.306   | 3.812±0.318  | 7.49E-04 |
| cg06282240 | 13 | 25497044  | TSS200                    | <i>CENPJ</i>        | -5.988±0.633 | -6.645±0.584 | 1.49E-05 |
| cg22448677 | 13 | 26796711  | TSS1500                   | <i>RNF6</i>         | -5.364±0.464 | -5.729±0.621 | 1.57E-03 |
| cg13433272 | 13 | 26828068  | TSS1500                   | <i>CDK8</i>         | -4.487±0.373 | -4.952±0.464 | 1.56E-06 |
| cg12584034 | 13 | 27825352  | TSS1500                   | <i>RPL21</i>        | -3.406±0.365 | -3.662±0.417 | 3.15E-03 |
| cg27323780 | 13 | 28024626  | GeneBody/5'UTR/1st intron | <i>MTIF3</i>        | -4.797±0.383 | -5.045±0.493 | 8.09E-03 |
| cg00859193 | 13 | 29233011  | TSS200                    | <i>POMP</i>         | -4.635±0.26  | -4.923±0.409 | 3.49E-05 |
| cg25955899 | 13 | 29233493  | GeneBody/1st intron       | <i>POMP</i>         | -5.746±0.415 | -6.3±0.663   | 1.48E-06 |
| cg09121849 | 13 | 30169249  | GeneBody/5'UTR/1st intron | <i>SLC7A1</i>       | -5.735±0.521 | -6.175±0.842 | 1.51E-03 |
| cg22781236 | 13 | 30424171  | GeneBody/5'UTR/1st exon   | <i>UBL3</i>         | -5.303±0.467 | -5.764±0.537 | 5.42E-05 |
| cg09203961 | 13 | 31040215  | TSS200                    | <i>HMGB1</i>        | -6.096±0.588 | -6.6±0.706   | 4.19E-04 |
| cg06901392 | 13 | 31736105  | GeneBody/5'UTR/1st exon   | <i>HSPH1</i>        | -4.672±0.333 | -5.042±0.431 | 1.30E-05 |
| cg03373442 | 13 | 31736396  | TSS1500                   | <i>HSPH1</i>        | -5.835±0.729 | -6.339±0.593 | 1.99E-03 |
| cg14714578 | 13 | 31774336  | GeneBody/1st intron       | <i>B3GALT</i>       | -5.839±0.541 | -6.347±0.661 | 1.36E-04 |
| cg27253386 | 13 | 32889752  | GeneBody/5'UTR/1st exon   | <i>BRCA2</i>        | -5.694±0.496 | -6.112±0.549 | 4.00E-04 |
| cg26516764 | 13 | 33160364  | TSS200                    | <i>PDS5B</i>        | -4.493±0.398 | -4.776±0.337 | 1.58E-03 |
| cg24254120 | 13 | 34392869  | GeneBody/1st intron       | <i>RFC3</i>         | -4.468±0.484 | -4.787±0.468 | 4.05E-03 |

|             |    |           |                           |             |              |              |          |
|-------------|----|-----------|---------------------------|-------------|--------------|--------------|----------|
| cg15318532  | 13 | 37393521  | GeneBody/1st exon         | RFXAP       | -5.807±0.554 | -6.294±0.604 | 2.29E-04 |
| cg01999787  | 13 | 37573656  | TSS200                    | ALG5        | -4.257±0.429 | -4.564±0.583 | 4.07E-03 |
| cg21721865  | 13 | 38923576  | TSS1500                   | UFM1        | -5.28±0.518  | -5.696±0.572 | 7.17E-04 |
| cg07243519  | 13 | 38924018  | GeneBody/5'UTR/1st exon   | UFM1        | -5.023±0.499 | -5.374±0.432 | 1.85E-03 |
| cg22950347  | 13 | 39611764  | GeneBody/5'UTR/1st exon   | PROSER1     | -5.401±0.489 | -5.874±0.464 | 4.41E-05 |
| cg21284880  | 13 | 40177740  | TSS1500                   | LHFP        | -4.595±0.569 | -5.205±0.558 | 9.72E-06 |
| cg15600342  | 13 | 41635509  | TSS200                    | WBP4        | -4.379±0.296 | -4.608±0.371 | 1.51E-03 |
| cg24219962  | 13 | 41635860  | GeneBody/1st intron       | WBP4        | -5.315±0.371 | -5.605±0.383 | 8.27E-04 |
| cg06146910  | 13 | 41706728  | GeneBody/5'UTR/1st exon   | KBTBD6      | -5.496±0.436 | -5.862±0.72  | 1.77E-03 |
| cg02178898  | 13 | 41837525  | GeneBody/5'UTR/1st intron | MTRF1       | -3.31±0.564  | -3.805±0.697 | 3.48E-04 |
| cg20458981  | 13 | 41885231  | TSS200                    | NAA16       | -4.04±0.411  | -4.464±0.405 | 1.87E-05 |
| cg17921034  | 13 | 42846375  | GeneBody/5'UTR/1st intron | AKAP11      | -4.364±0.49  | -4.675±0.542 | 6.96E-03 |
| cg26197220  | 13 | 45150229  | GeneBody/1st exon         | TSC22D1-AS1 | -5.655±0.67  | -6.368±0.814 | 2.06E-05 |
| cg10872447  | 13 | 45694593  | TSS200                    | GTF2F2      | -5.248±0.403 | -5.678±0.596 | 4.71E-05 |
| cg02296128  | 13 | 45694882  | GeneBody/1st intron       | GTF2F2      | -5.171±0.348 | -5.396±0.385 | 5.86E-03 |
| cg27523951  | 13 | 46038867  | TSS200                    | COG3        | -4.632±0.456 | -5.03±0.618  | 5.16E-04 |
| cg08608800  | 13 | 46626937  | TSS200                    | ZC3H13      | -5.163±0.516 | -5.487±0.477 | 5.56E-03 |
| cg11473104  | 13 | 48611615  | TSS200                    | NUDT15      | -0.761±0.178 | -0.549±0.263 | 7.49E-06 |
| cg19764399  | 13 | 48669116  | GeneBody/5'UTR/1st intron | MED4        | -5.076±0.754 | -5.739±0.726 | 1.79E-04 |
| cg04217178  | 13 | 48807122  | TSS200                    | ITM2B       | -5.374±0.341 | -5.65±0.334  | 5.08E-04 |
| cg02632166  | 13 | 48807510  | GeneBody/1st exon         | ITM2B       | -4.902±0.288 | -5.131±0.494 | 3.66E-03 |
| cg18236297  | 13 | 49280407  | TSS1500                   | CYSLTR2     | 1.407±0.542  | 0.804±0.692  | 1.19E-05 |
| cg27009631  | 13 | 49551038  | GeneBody/5'UTR/1st exon   | FNDC3A      | -5.552±0.484 | -5.873±0.657 | 7.80E-03 |
| cg18112431  | 13 | 49821843  | TSS1500                   | CDADC1      | -4.651±0.308 | -4.925±0.299 | 1.51E-04 |
| cg07000831  | 13 | 50018514  | GeneBody/5'UTR/1st exon   | SETDB2      | -4.959±0.393 | -5.244±0.398 | 1.73E-03 |
| cg15609273  | 13 | 50159867  | TSS200                    | RCBTB1      | -4.432±0.273 | -4.704±0.482 | 3.38E-04 |
| cg09276355  | 13 | 50510822  | TSS200                    | SPRYD7      | -4.929±0.347 | -5.345±0.51  | 6.46E-06 |
| cg27533013  | 13 | 50588057  | TSS1500                   | KCNRG       | 1.733±0.42   | 1.482±0.382  | 8.03E-03 |
| cg10029411  | 13 | 50746245  | GeneBody/1st exon         | ST13P4      | 0.412±0.32   | 0.207±0.299  | 4.68E-03 |
| cg07818646  | 13 | 51483769  | TSS200                    | RNASEH2B    | -5.717±0.608 | -6.272±0.688 | 1.59E-04 |
| cg04206644  | 13 | 52026632  | GeneBody/1st exon         | INTS6       | -4.859±0.479 | -5.298±0.602 | 2.07E-04 |
| cg05508048  | 13 | 52027321  | TSS200                    | INTS6       | -4.642±0.265 | -5.053±0.399 | 3.93E-08 |
| cg00888561  | 13 | 52157910  | TSS1500                   | WDFY2       | -4.375±0.41  | -4.673±0.555 | 3.60E-03 |
| cg02543879  | 13 | 53024717  | GeneBody/1st exon         | VPS36       | -4.446±0.375 | -4.776±0.598 | 9.18E-04 |
| cg17164340  | 13 | 53025003  | TSS1500                   | VPS36       | -4.416±0.253 | -4.571±0.241 | 7.00E-03 |
| cg10218426  | 13 | 53029438  | TSS200                    | CKAP2       | -5.267±0.384 | -5.629±0.374 | 6.92E-05 |
| cg11298616  | 13 | 53029954  | GeneBody/1st intron       | CKAP2       | -4.369±0.344 | -4.708±0.55  | 2.22E-04 |
| cg03996465  | 13 | 53226743  | TSS200                    | SUGT1       | -4.63±0.362  | -4.966±0.508 | 2.74E-04 |
| cg06507645  | 13 | 53227164  | GeneBody/1st intron       | SUGT1       | -3.672±0.389 | -4.085±0.6   | 6.28E-05 |
| cg02407785  | 13 | 67804285  | GeneBody/5'UTR/1st exon   | PCDH9       | -4.551±0.692 | -4.965±0.637 | 8.16E-03 |
| cg04171565  | 13 | 73302130  | GeneBody/5'UTR/1st exon   | BORA        | -4.312±0.381 | -4.868±0.569 | 1.52E-07 |
| cg02162950  | 13 | 73355953  | TSS1500                   | PIBF1       | -4.605±0.408 | -5.09±0.625  | 9.58E-06 |
| cg12930920  | 13 | 73356356  | TSS200                    | DIS3        | -4.184±0.27  | -4.39±0.426  | 3.78E-03 |
| cg09667226  | 13 | 73632762  | TSS1500                   | KLF5        | -4.681±0.37  | -5.145±0.508 | 1.92E-06 |
| cg12848131  | 13 | 73633312  | GeneBody/5'UTR/1st exon   | KLF5        | -5.768±0.368 | -6.037±0.464 | 2.69E-03 |
| cg11794728  | 13 | 74707860  | GeneBody/5'UTR/1st intron | KLF12       | -4.814±0.447 | -5.1±0.572   | 8.77E-03 |
| cg16257685  | 13 | 76124267  | GeneBody                  | UCHL3       | -5.16±0.537  | -5.503±0.588 | 6.40E-03 |
| cg08697285  | 13 | 77901013  | GeneBody/5'UTR/1st exon   | MYCBP2      | -3.523±0.211 | -3.304±0.285 | 4.76E-05 |
| cg03999420  | 13 | 77901358  | TSS200                    | MYCBP2      | -4.736±0.329 | -5.013±0.323 | 3.24E-04 |
| cg211063899 | 13 | 78109801  | TSS200                    | SCEL        | -0.544±0.606 | -1.125±0.707 | 8.66E-05 |
| cg21306212  | 13 | 79979929  | TSS200                    | RBM26       | -3.815±0.208 | -3.815±0.311 | 7.93E-03 |
| cg25139619  | 13 | 91999408  | TSS1500                   | MIR17HG     | -5.073±0.411 | -5.441±0.561 | 3.75E-04 |
| cg23246978  | 13 | 93879042  | TSS200                    | GPC6        | -3.851±0.695 | -4.398±0.662 | 6.57E-04 |
| cg23922914  | 13 | 95248439  | GeneBody/5'UTR/1st exon   | TGDS        | -5.539±0.487 | -5.89±0.469  | 1.74E-03 |
| cg06220521  | 13 | 95254216  | GeneBody/1st exon         | GPR180      | -4.924±0.288 | -5.206±0.51  | 4.31E-04 |
| cg06255524  | 13 | 96328888  | TSS1500                   | DNAJC3      | -4.888±0.533 | -5.312±0.579 | 7.62E-04 |
| cg08797194  | 13 | 96705123  | GeneBody/1st intron       | UGGT2       | -3.165±0.632 | -3.804±0.912 | 9.41E-05 |
| cg25169784  | 13 | 96706045  | TSS1500                   | UGGT2       | -4.086±0.356 | -4.369±0.483 | 1.49E-03 |
| cg25329939  | 13 | 98085947  | TSS1500                   | RAP2A       | -4.607±0.317 | -4.812±0.26  | 3.67E-03 |
| cg06111305  | 13 | 98086784  | GeneBody/1st exon         | RAP2A       | -4.775±0.404 | -5.091±0.508 | 1.37E-03 |
| cg02246968  | 13 | 99852859  | GeneBody/1st intron       | UBAC2-AS1   | -5.292±0.321 | -5.496±0.381 | 7.60E-03 |
| cg02213716  | 13 | 99853497  | GeneBody/5'UTR/1st exon   | UBAC2       | -4.715±0.29  | -5.077±0.417 | 2.80E-06 |
| cg20865068  | 13 | 100153453 | TSS200                    | TM9SF2      | -5.093±0.624 | -5.548±0.655 | 1.78E-03 |
| cg23446109  | 13 | 100740987 | TSS1500                   | PCCA        | -4.292±0.441 | -4.642±0.79  | 4.41E-03 |
| cg16208448  | 13 | 103249991 | GeneBody/1st intron       | TPP2        | -2.672±0.574 | -3.176±0.713 | 3.55E-04 |
| cg06880557  | 13 | 103425546 | GeneBody/5'UTR/1st intron | TEX30       | -4.648±0.442 | -5.067±0.502 | 9.47E-05 |
| cg22767079  | 13 | 103451338 | TSS200                    | BIVM        | -4.758±0.412 | -5.179±0.603 | 8.23E-05 |
| cg18247638  | 13 | 103451366 | TSS200                    | BIVM        | -4.356±0.652 | -4.826±0.635 | 1.72E-03 |
| cg07177755  | 13 | 103498027 | TSS200                    | ERCC5       | -0.059±0.438 | -5.404±0.511 | 1.03E-03 |
| cg13057891  | 13 | 103498411 | GeneBody/5'UTR/1st exon   | ERCC5       | -5.151±0.383 | -5.478±0.528 | 6.93E-04 |
| cg08216792  | 13 | 108868060 | TSS200                    | LIG4        | -4.378±0.345 | -4.741±0.528 | 7.01E-05 |
| cg15270851  | 13 | 111358291 | GeneBody/1st exon         | CARS2       | -3.999±0.247 | -4.278±0.367 | 1.98E-05 |
| cg26272237  | 13 | 111358862 | TSS1500                   | CARS2       | -5.317±0.331 | -5.576±0.515 | 2.81E-03 |
| cg21624282  | 13 | 113030783 | GeneBody/1st exon         | SPACA7      | 2.022±0.688  | 1.461±0.93   | 1.10E-03 |
| cg21367957  | 13 | 113776252 | TSS1500                   | F10         | 2.241±0.631  | 1.757±0.97   | 3.27E-03 |
| cg18540305  | 13 | 114145361 | GeneBody/5'UTR/1st exon   | TMCO3       | -5.916±0.41  | -6.454±0.69  | 2.98E-06 |
| cg13064881  | 13 | 115000873 | GeneBody/1st intron       | CDC16       | -4.045±0.199 | -4.204±0.223 | 7.96E-04 |
| cg13176285  | 13 | 115080469 | GeneBody/5'UTR/1st intron | CHAMP1      | -4.98±0.487  | -5.318±0.573 | 3.72E-03 |
| cg20483016  | 14 | 20774219  | TSS200                    | TTC5        | -3.389±0.27  | -3.667±0.303 | 2.68E-05 |
| cg24595957  | 14 | 20811627  | TSS200                    | RPPH1       | -4.929±0.564 | -5.272±0.474 | 6.46E-03 |
| cg15035713  | 14 | 20881570  | GeneBody/5'UTR/1st exon   | TEP1        | -4.538±0.33  | -4.987±0.481 | 5.63E-07 |
| cg22438324  | 14 | 20922915  | GeneBody/5'UTR/1st exon   | OSGEP       | -5.61±0.537  | -5.986±0.438 | 1.77E-03 |
| cg21337430  | 14 | 20923471  | GeneBody/5'UTR/1st exon   | APEX1       | -4.369±0.209 | -4.703±0.335 | 3.42E-08 |
| cg14353162  | 14 | 20929766  | TSS200                    | TMEM55B     | -4.528±0.384 | -4.797±0.498 | 4.27E-03 |
| cg22723026  | 14 | 21152452  | GeneBody/5'UTR/1st exon   | RNASE4      | -5.277±0.485 | -5.58±0.501  | 6.91E-03 |
| cg19211827  | 14 | 21152810  | GeneBody/5'UTR/1st exon   | RNASE4      | -4.269±0.385 | -4.541±0.536 | 5.02E-03 |
| cg15427567  | 14 | 21458055  | GeneBody/5'UTR/1st exon   | METTL17     | -4.832±0.372 | -5.077±0.438 | 5.84E-03 |
| cg18079631  | 14 | 21737765  | TSS200                    | HNRNPC      | -4.442±0.424 | -4.829±0.544 | 2.34E-04 |
| cg18801292  | 14 | 21852650  | TSS1500                   | SUPT16H     | -5.601±0.466 | -6.087±0.485 | 1.78E-05 |
| cg02806093  | 14 | 21944967  | TSS200                    | RAB2B       | -4.773±0.649 | -5.217±0.607 | 2.71E-03 |
| cg11053740  | 14 | 21945175  | TSS200                    | RAB2B       | -4.258±0.486 | -4.667±0.656 | 7.55E-04 |
| cg27348440  | 14 | 22090709  | 0                         | 0           | 2.098±0.266  | 1.923±0.351  | 7.67E-03 |
| cg10145369  | 14 | 23058288  | TSS200                    | DAD1        | -6.07±0.403  | -6.397±0.505 | 9.37E-04 |
| cg19482581  | 14 | 23067335  | GeneBody/1st intron       | ABHD4       | -4.443±0.31  | -4.635±0.288 | 6.48E-03 |
| cg13222081  | 14 | 23298926  | TSS200                    | MRPL52      | -3.762±0.637 | -4.146±0.61  | 8.09E-03 |

|            |    |          |                           |                      |              |              |          |
|------------|----|----------|---------------------------|----------------------|--------------|--------------|----------|
| cg18504358 | 14 | 23340787 | TSS200                    | <i>LRP10</i>         | -4.348±0.349 | -4.612±0.467 | 2.34E-03 |
| cg23690380 | 14 | 23398654 | GeneBody/5'UTR/1st exon   | <i>PRMT5</i>         | -3.925±0.538 | -4.355±0.782 | 1.75E-03 |
| cg04884122 | 14 | 23504085 | GeneBody/1st exon         | <i>PSMB5</i>         | -4.655±0.409 | -5.257±0.503 | 5.15E-08 |
| cg24857117 | 14 | 23504316 | GeneBody/5'UTR/1st exon   | <i>PSMB5</i>         | -3.808±0.491 | -4.169±0.68  | 3.43E-03 |
| cg25803423 | 14 | 23563820 | TSS1500                   | <i>C14orf119</i>     | -3.863±0.364 | -4.27±0.503  | 1.53E-05 |
| cg11819429 | 14 | 23565029 | TSS1500                   | <i>ACIN1</i>         | -3.867±0.384 | -3.639±0.37  | 9.17E-03 |
| cg24555600 | 14 | 24422956 | TSS200                    | <i>DHRS4</i>         | -4.337±0.383 | -4.786±0.589 | 1.30E-05 |
| cg25487438 | 14 | 24584340 | TSS200                    | <i>DCAF11</i>        | -4.245±0.429 | -4.53±0.424  | 3.90E-03 |
| cg07602026 | 14 | 24605550 | GeneBody/1st intron       | <i>PSME1</i>         | -4.619±0.334 | -4.855±0.536 | 7.69E-03 |
| cg16769376 | 14 | 24685222 | GeneBody/5'UTR/1st exon   | <i>MDP1</i>          | -5.127±0.418 | -5.472±0.469 | 5.57E-04 |
| cg24685926 | 14 | 24685281 | TSS200                    | <i>MDP1</i>          | -4.181±0.307 | -4.478±0.415 | 1.33E-04 |
| cg17391929 | 14 | 24702094 | TSS200                    | <i>GMPR2</i>         | -3.485±0.307 | -3.702±0.33  | 2.50E-03 |
| cg17109273 | 14 | 24712029 | TSS200                    | <i>TINF2</i>         | -5.545±0.385 | -6.056±0.659 | 2.62E-06 |
| cg18978324 | 14 | 24740937 | TSS200                    | <i>RABGGTA</i>       | -5.131±0.425 | -5.632±0.581 | 6.12E-06 |
| cg06824727 | 14 | 24768621 | GeneBody/5'UTR/1st exon   | <i>DHRS1</i>         | -3.879±0.35  | -4.113±0.431 | 5.83E-03 |
| cg20822579 | 14 | 24809073 | GeneBody/5'UTR/1st exon   | <i>RIPK3</i>         | -3.124±0.885 | -3.645±0.708 | 7.82E-03 |
| cg09539408 | 14 | 31495940 | GeneBody/5'UTR/1st exon   | <i>AP4S1</i>         | -4.647±0.354 | -4.871±0.418 | 8.02E-03 |
| cg00832517 | 14 | 31926792 | TSS200                    | <i>DTD2</i>          | -4.223±0.619 | -4.675±0.656 | 1.78E-03 |
| cg20550520 | 14 | 32545277 | GeneBody/1st exon         | <i>ARHGAP5-AS1</i>   | -3.456±0.418 | -3.735±0.433 | 3.96E-03 |
| cg21379309 | 14 | 34931822 | TSS1500                   | <i>SPTSSA</i>        | -5.367±0.571 | -5.873±0.542 | 1.50E-04 |
| cg26949796 | 14 | 35183363 | TSS1500                   | <i>CFL2</i>          | -4.314±0.316 | -4.653±0.458 | 3.86E-05 |
| cg25096582 | 14 | 35183928 | GeneBody/1st exon         | <i>CFL2</i>          | -4.924±0.411 | -5.314±0.66  | 3.75E-04 |
| cg18383160 | 14 | 35515291 | TSS1500                   | <i>FAM177A1</i>      | -4.714±0.555 | -5.168±0.529 | 4.22E-04 |
| cg25755261 | 14 | 35591781 | GeneBody/5'UTR/1st exon   | <i>KIAA0391</i>      | -4.653±0.366 | -4.882±0.321 | 5.41E-03 |
| cg22624926 | 14 | 35761401 | TSS200                    | <i>PSMA6</i>         | -4.836±0.519 | -5.278±0.564 | 3.47E-04 |
| cg08039281 | 14 | 35761689 | GeneBody/1st exon         | <i>PSMA6</i>         | -3.87±0.315  | -4.154±0.453 | 4.23E-04 |
| cg05852416 | 14 | 35874177 | TSS1500                   | <i>NFKBIA</i>        | -5.447±0.463 | -5.851±0.477 | 2.24E-04 |
| cg23521069 | 14 | 39583513 | GeneBody/1st exon         | <i>GEMIN2</i>        | -5.097±0.62  | -5.762±0.683 | 1.31E-05 |
| cg04585992 | 14 | 39639574 | GeneBody/5'UTR/1st exon   | <i>TRAPPC6B</i>      | -4.342±0.229 | -4.612±0.338 | 9.10E-06 |
| cg01078871 | 14 | 39901508 | GeneBody/5'UTR/1st exon   | <i>FBXO33</i>        | -3.886±0.369 | -3.49±0.469  | 2.14E-05 |
| cg21600563 | 14 | 39901846 | TSS200                    | <i>FBXO33</i>        | -5.415±0.376 | -5.919±0.608 | 1.54E-06 |
| cg12503243 | 14 | 45553114 | TSS200                    | <i>PRPF39</i>        | -3.223±0.592 | -3.839±0.68  | 2.44E-05 |
| cg03491181 | 14 | 45605002 | TSS200                    | <i>FANCM</i>         | -4.501±0.718 | -4.979±0.647 | 3.28E-03 |
| cg15937081 | 14 | 45722043 | GeneBody/5'UTR/1st intron | <i>MIS18BP1</i>      | -3.949±0.512 | -4.335±0.637 | 1.99E-03 |
| cg04166304 | 14 | 45722617 | TSS200                    | <i>MIS18BP1</i>      | -5.178±0.459 | -5.681±0.514 | 9.59E-06 |
| cg13892015 | 14 | 50065056 | TSS1500                   | <i>LRR1</i>          | -4.112±0.592 | -4.553±0.571 | 1.23E-03 |
| cg11328875 | 14 | 50066018 | GeneBody/1st intron       | <i>LRR1</i>          | -5.173±0.579 | -5.669±0.57  | 2.50E-04 |
| cg07184439 | 14 | 50087799 | GeneBody/5'UTR/1st exon   | <i>MGAT2</i>         | -4.649±0.471 | -4.951±0.487 | 5.63E-03 |
| cg14723799 | 14 | 50101089 | GeneBody/1st exon         | <i>DNAAF2</i>        | -5.536±0.466 | -5.89±0.461  | 1.06E-03 |
| cg15365950 | 14 | 50160307 | GeneBody/1st intron       | <i>KLHDC1</i>        | -5.266±0.335 | -5.594±0.335 | 4.22E-05 |
| cg25974764 | 14 | 50234454 | TSS1500                   | <i>KLHDC2</i>        | -5.345±0.281 | -5.534±0.333 | 4.95E-03 |
| cg19584823 | 14 | 50235219 | GeneBody/1st exon         | <i>KLHDC2</i>        | -4.331±0.382 | -4.707±0.44  | 5.64E-05 |
| cg27289104 | 14 | 50319271 | GeneBody/1st intron       | <i>NEMF</i>          | -4.395±0.407 | -4.746±0.562 | 6.46E-04 |
| cg06956646 | 14 | 50698982 | TSS1500                   | <i>SOS2</i>          | -4.72±0.435  | -5.261±0.563 | 1.79E-06 |
| cg26255649 | 14 | 50778895 | GeneBody/5'UTR/1st exon   | <i>L2HGDH</i>        | -5.898±0.426 | -6.194±0.483 | 3.33E-03 |
| cg12867068 | 14 | 50863241 | TSS1500                   | <i>CDKL1</i>         | -5.025±0.405 | -5.335±0.619 | 3.20E-03 |
| cg18440188 | 14 | 50999316 | GeneBody/5'UTR/1st exon   | <i>MAP4K5</i>        | -4.796±0.353 | -5.231±0.595 | 9.20E-06 |
| cg17356181 | 14 | 50999707 | TSS200                    | <i>ATL1</i>          | -5.088±0.376 | -5.335±0.422 | 5.31E-03 |
| cg18125479 | 14 | 51411049 | GeneBody/1st exon         | <i>PYGL</i>          | -4.156±0.483 | -4.503±0.487 | 1.94E-03 |
| cg20284440 | 14 | 52118688 | GeneBody/5'UTR/1st exon   | <i>FRMD6</i>         | -4.793±0.509 | -5.28±0.818  | 3.46E-04 |
| cg01254459 | 14 | 53173891 | TSS200                    | <i>PSMC6</i>         | -5.064±0.346 | -5.36±0.487  | 7.26E-04 |
| cg17091770 | 14 | 53197072 | GeneBody/5'UTR/1st intron | <i>STYX</i>          | -4.646±0.594 | -5.392±0.682 | 9.35E-07 |
| cg02626977 | 14 | 54863550 | TSS200                    | <i>CDKN3</i>         | -5.461±0.545 | -5.845±0.584 | 2.67E-03 |
| cg27144162 | 14 | 54908289 | TSS200                    | <i>CNIH</i>          | -4.895±0.415 | -5.369±0.501 | 6.22E-06 |
| cg09877136 | 14 | 54955533 | GeneBody/1st intron       | <i>GMFB</i>          | -4.747±0.37  | -5.05±0.534  | 1.32E-03 |
| cg20629089 | 14 | 55034451 | GeneBody/5'UTR/1st exon   | <i>SAMD4A</i>        | -4.694±0.31  | -5.153±0.472 | 1.29E-07 |
| cg12422968 | 14 | 55369088 | GeneBody/1st exon         | <i>GCH1</i>          | -5.389±0.462 | -5.734±0.467 | 1.29E-03 |
| cg16047482 | 14 | 55493763 | GeneBody/5'UTR/1st exon   | <i>WDHD1</i>         | -5.513±0.457 | -6.014±0.529 | 1.07E-05 |
| cg02909042 | 14 | 55518132 | TSS1500                   | <i>MAPK1IP1L</i>     | -5.316±0.398 | -5.623±0.392 | 8.43E-04 |
| cg20016874 | 14 | 55518446 | GeneBody/5'UTR/1st exon   | <i>MAPK1IP1L</i>     | -5.277±0.483 | -5.63±0.547  | 2.03E-03 |
| cg25465634 | 14 | 55658290 | GeneBody/5'UTR/1st exon   | <i>DLGAP5</i>        | -4.247±0.482 | -4.581±0.663 | 5.59E-03 |
| cg24579896 | 14 | 56047964 | GeneBody/5'UTR/1st intron | <i>KTN1</i>          | -4.396±0.647 | -4.911±0.666 | 6.73E-04 |
| cg17071536 | 14 | 57736065 | TSS1500                   | <i>EXOC5</i>         | -5.087±0.374 | -5.486±0.542 | 4.24E-05 |
| cg12533010 | 14 | 58711667 | GeneBody/1st intron       | <i>PSMA3</i>         | -4.15±0.591  | -4.737±0.721 | 5.90E-05 |
| cg09694403 | 14 | 60632105 | GeneBody/5'UTR/1st exon   | <i>DHRS7</i>         | -5.676±0.6   | -6.053±0.597 | 6.12E-03 |
| cg13425637 | 14 | 61788328 | TSS200                    | <i>PRKCH</i>         | -5.122±0.533 | -5.462±0.602 | 6.96E-03 |
| cg06501084 | 14 | 63568195 | GeneBody/5'UTR/1st intron | <i>KCNH5</i>         | 0.298±0.466  | -0.257±0.718 | 1.20E-05 |
| cg02018101 | 14 | 64320521 | GeneBody/5'UTR/1st intron | <i>SYNE2</i>         | -4.983±0.428 | -5.386±0.455 | 8.67E-05 |
| cg16792632 | 14 | 64761208 | TSS200                    | <i>ESR2</i>          | -5.226±1.047 | -5.889±0.742 | 3.87E-03 |
| cg13581475 | 14 | 64854533 | TSS1500                   | <i>MTHFD1</i>        | -5.804±0.531 | -6.247±0.61  | 5.08E-04 |
| cg19637116 | 14 | 65453410 | TSS200                    | <i>FNTB</i>          | -3.986±0.542 | -4.391±0.62  | 1.70E-03 |
| cg10740670 | 14 | 65453617 | GeneBody/5'UTR/1st exon   | <i>FNTB</i>          | -4.809±0.317 | -5.036±0.406 | 3.49E-03 |
| cg13555543 | 14 | 65568995 | GeneBody/1st intron       | <i>MAX</i>           | -5.033±0.393 | -5.333±0.407 | 1.11E-03 |
| cg08056903 | 14 | 66974163 | GeneBody/5'UTR/1st exon   | <i>GPHN</i>          | -4.143±0.406 | -4.41±0.554  | 8.28E-03 |
| cg07218192 | 14 | 67707706 | TSS1500                   | <i>MPP5</i>          | -4.56±0.277  | -4.834±0.404 | 1.30E-04 |
| cg02045085 | 14 | 67708311 | GeneBody/5'UTR/1st intron | <i>MPP5</i>          | -5.578±0.415 | -5.995±0.521 | 5.70E-05 |
| cg12648263 | 14 | 68067090 | TSS200                    | <i>PIGH</i>          | -5.302±0.526 | -5.821±0.563 | 4.44E-05 |
| cg18458993 | 14 | 68086576 | TSS200                    | <i>ARG2</i>          | -4.178±0.307 | -4.523±0.633 | 1.87E-04 |
| cg25484319 | 14 | 68162304 | GeneBody/1st intron       | <i>RDH11</i>         | -2.817±0.528 | -3.267±0.634 | 4.48E-04 |
| cg09424925 | 14 | 68286418 | TSS200                    | <i>RAD51B</i>        | -3.763±0.506 | -4.195±0.515 | 2.79E-04 |
| cg08158860 | 14 | 68286515 | GeneBody/5'UTR/1st exon   | <i>RAD51B</i>        | -4.594±0.582 | -4.958±0.663 | 8.05E-03 |
| cg21350283 | 14 | 69445743 | GeneBody/1st exon         | <i>ACTN1</i>         | -4.896±0.447 | -5.432±0.592 | 3.87E-06 |
| cg05300132 | 14 | 69676275 | GeneBody                  | <i>EXD2</i>          | 3.236±0.393  | 3.521±0.535  | 3.69E-03 |
| cg25346972 | 14 | 70826282 | GeneBody/1st exon         | <i>COX16</i>         | -5.242±0.342 | -5.472±0.307 | 2.96E-03 |
| cg26709859 | 14 | 70883674 | GeneBody/1st exon         | <i>YJNJ2BP-COX16</i> | -4.596±0.471 | -4.874±0.463 | 9.74E-03 |
| cg02998425 | 14 | 70924204 | GeneBody/5'UTR            | <i>ADAM21</i>        | 1.26±0.804   | 0.726±0.908  | 4.99E-03 |
| cg26097271 | 14 | 71067346 | GeneBody/1st exon         | <i>MED6</i>          | -4.376±0.366 | -4.601±0.282 | 5.21E-03 |
| cg07774222 | 14 | 71067759 | TSS1500                   | <i>MED6</i>          | -5.269±0.449 | -5.649±0.524 | 4.44E-04 |
| cg16747567 | 14 | 71373858 | TSS1500                   | <i>PCNX</i>          | -4.176±0.419 | -4.531±0.492 | 4.49E-04 |
| cg03188118 | 14 | 72399809 | GeneBody/5'UTR/1st exon   | <i>RGS6</i>          | -1.466±0.577 | -1.111±0.676 | 9.83E-03 |
| cg07070694 | 14 | 73493830 | GeneBody/5'UTR/1st exon   | <i>ZFYVE1</i>        | -3.059±0.151 | -3.197±0.244 | 6.02E-04 |
| cg25694542 | 14 | 73493846 | GeneBody/5'UTR/1st exon   | <i>ZFYVE1</i>        | -4.674±0.288 | -5.086±0.543 | 1.47E-06 |
| cg03617367 | 14 | 74226931 | GeneBody/5'UTR/1st exon   | <i>ELMSAN1</i>       | -5.604±0.501 | -6.016±0.541 | 5.15E-04 |
| cg23940655 | 14 | 74227020 | TSS200                    | <i>ELMSAN1</i>       | -4.852±0.474 | -5.272±0.59  | 3.12E-04 |
| cg15729423 | 14 | 74318413 | TSS200                    | <i>PTGR2</i>         | -4.496±0.336 | -4.943±0.504 | 1.08E-06 |

|            |    |           |                           |           |              |              |          |
|------------|----|-----------|---------------------------|-----------|--------------|--------------|----------|
| cg12152256 | 14 | 74353709  | GeneBody/1st intron       | ZNF410    | -5.014±0.312 | -5.345±0.443 | 4.12E-05 |
| cg15492104 | 14 | 74417249  | TSS200                    | FAM161B   | -4.787±0.318 | -5.111±0.449 | 7.56E-05 |
| cg22201387 | 14 | 74485554  | GeneBody/5'UTR/1st intron | ENTPD5    | -4.872±0.338 | -5.214±0.516 | 1.24E-04 |
| cg09194436 | 14 | 7551682   | GeneBody/1st exon         | LIN52     | -5.269±0.542 | -5.803±0.653 | 6.47E-05 |
| cg04798158 | 14 | 75179846  | TSS200                    | FCF1      | -4.845±0.454 | -5.248±0.587 | 3.42E-04 |
| cg23407670 | 14 | 75518217  | GeneBody/5'UTR/1st exon   | MLH3      | -4.933±0.559 | -5.372±0.629 | 9.75E-04 |
| cg19691267 | 14 | 75530649  | GeneBody/5'UTR/1st intron | ACYP1     | -3.805±0.304 | -4.084±0.341 | 1.49E-04 |
| cg08847533 | 14 | 75593920  | TSS200                    | NEK9      | -4.875±0.644 | -5.307±0.875 | 7.08E-03 |
| cg18672421 | 14 | 75643415  | TSS200                    | TMED10    | -5.05±0.725  | -5.699±0.824 | 2.09E-04 |
| cg17644867 | 14 | 75746076  | GeneBody/1st intron       | FOS       | -4.864±0.421 | -5.291±0.496 | 3.83E-05 |
| cg09430689 | 14 | 76127296  | GeneBody/5'UTR/1st exon   | C14orf1   | -6.284±0.416 | -6.621±0.533 | 1.00E-03 |
| cg13438944 | 14 | 76452183  | GeneBody/1st exon         | IFT43     | -4.934±0.496 | -5.321±0.532 | 8.92E-04 |
| cg04371779 | 14 | 76618201  | TSS200                    | GPATCH2L  | -5.429±0.334 | -5.687±0.466 | 2.23E-03 |
| cg01457080 | 14 | 77278578  | GeneBody/1st intron       | ANGEL1    | -4.955±0.362 | -5.513±0.525 | 4.03E-08 |
| cg03366677 | 14 | 77495018  | GeneBody/5'UTR/1st exon   | IRF2BP1   | -6.118±0.605 | -6.533±0.62  | 3.08E-03 |
| cg17080180 | 14 | 77788400  | GeneBody/5'UTR/1st intron | GSTZ1     | -4.224±0.403 | -4.644±0.481 | 2.70E-05 |
| cg17598875 | 14 | 77923690  | GeneBody/5'UTR/1st intron | VIPAS39   | -4.595±0.567 | -4.994±0.616 | 2.72E-03 |
| cg19815139 | 14 | 77924143  | TSS200                    | VIPAS39   | -4.713±0.337 | -5.035±0.412 | 1.02E-04 |
| cg27553433 | 14 | 78083305  | TSS200                    | SPTLC2    | -4.851±0.416 | -5.24±0.413  | 3.42E-04 |
| cg08426384 | 14 | 78266734  | GeneBody/5'UTR/1st intron | ADCK1     | -3.889±0.191 | -4.083±0.344 | 2.93E-04 |
| cg10686044 | 14 | 82000026  | GeneBody/1st exon         | SEL1L     | -5.329±0.491 | -5.675±0.682 | 5.06E-03 |
| cg12269343 | 14 | 82000433  | TSS1500                   | SEL1L     | -4.488±0.507 | -4.839±0.442 | 2.20E-03 |
| cg14046757 | 14 | 89029605  | TSS200                    | ZC3H14    | -4.997±0.367 | -5.226±0.43  | 8.92E-03 |
| cg00009407 | 14 | 89290921  | TSS200                    | TTC8      | -5.851±0.57  | -6.214±0.548 | 5.29E-03 |
| cg05923056 | 14 | 89883246  | GeneBody/5'UTR/1st exon   | FOXN3     | -4.76±0.597  | -5.236±0.692 | 8.92E-04 |
| cg02276686 | 14 | 90722856  | TSS200                    | PSMC1     | -4.33±0.355  | -4.732±0.569 | 2.87E-05 |
| cg03062665 | 14 | 90863127  | TSS200                    | CALM1     | -5.859±0.553 | -6.348±0.613 | 2.24E-04 |
| cg20328328 | 14 | 90863801  | GeneBody/1st intron       | CALM1     | -4.831±0.308 | -5.195±0.504 | 1.66E-05 |
| cg02904235 | 14 | 91527369  | TSS1500                   | RPS6KA5   | -4.897±0.538 | -5.466±0.712 | 3.12E-05 |
| cg25398949 | 14 | 91527472  | TSS1500                   | RPS6KA5   | -4.589±0.53  | -4.914±0.591 | 9.36E-03 |
| cg26910205 | 14 | 91977306  | TSS1500                   | SMEK1     | -4.718±0.462 | -5.028±0.521 | 4.54E-03 |
| cg24633648 | 14 | 92302448  | GeneBody/5'UTR/1st intron | TC2N      | -3.173±0.308 | -3.382±0.484 | 9.92E-03 |
| cg06279414 | 14 | 92506140  | GeneBody/5'UTR/1st exon   | TRIP11    | -4.552±0.376 | -4.93±0.477  | 5.80E-05 |
| cg09458170 | 14 | 92572575  | GeneBody/1st intron       | ATXN3     | -4.565±0.352 | -4.908±0.406 | 6.66E-05 |
| cg24527001 | 14 | 92588234  | TSS200                    | CPSF2     | -5.149±0.37  | -5.492±0.546 | 3.37E-04 |
| cg12685200 | 14 | 93214923  | GeneBody/5'UTR/1st exon   | LGMN      | -5.358±0.496 | -5.657±0.534 | 9.87E-03 |
| cg18477315 | 14 | 93261178  | GeneBody/5'UTR/1st intron | GOLGA5    | -4.369±0.321 | -4.651±0.498 | 8.24E-04 |
| cg12873941 | 14 | 93651794  | GeneBody/1st exon         | TMEM251   | -4.612±0.538 | -4.991±0.598 | 2.87E-03 |
| cg11172299 | 14 | 93673792  | TSS1500                   | C14orf142 | -5.993±0.426 | -6.304±0.448 | 1.77E-03 |
| cg27651218 | 14 | 93813520  | TSS200                    | COX8C     | 4.162±0.537  | 3.516±1.253  | 2.00E-04 |
| cg00592315 | 14 | 94384611  | TSS1500                   | FAM181A   | 1.831±0.527  | 1.398±0.752  | 1.40E-03 |
| cg20022541 | 14 | 94385395  | GeneBody/5'UTR/1st intron | FAM181A   | 2.31±0.666   | 1.865±0.966  | 8.75E-03 |
| cg18680021 | 14 | 94492759  | GeneBody/5'UTR/1st exon   | OTUB2     | -5.377±0.557 | -5.789±0.51  | 1.20E-03 |
| cg06887170 | 14 | 94596104  | TSS200                    | IFI2L2    | -4.129±0.7   | -4.572±0.703 | 5.95E-03 |
| cg19937039 | 14 | 94759767  | TSS200                    | SERPINA10 | -0.325±0.552 | -0.683±0.773 | 9.85E-03 |
| cg19042947 | 14 | 95027441  | TSS1500                   | SERPINA4  | -0.035±0.478 | -0.337±0.602 | 9.43E-03 |
| cg25889160 | 14 | 95046342  | TSS1500                   | SERPINA5  | 2.262±0.615  | 1.837±0.944  | 8.03E-03 |
| cg16937611 | 14 | 95048102  | GeneBody/5'UTR            | SERPINA5  | 0.947±0.623  | 0.474±0.907  | 2.92E-03 |
| cg16507522 | 14 | 95077557  | TSS1500                   | SERPINA3  | 1.341±0.538  | 0.938±0.915  | 5.86E-03 |
| cg27504299 | 14 | 96152109  | TSS1500                   | TCL1B     | 1.282±0.683  | 0.718±1.069  | 1.69E-03 |
| cg17504464 | 14 | 96857890  | TSS1500                   | AK7       | -4.744±0.473 | -5.055±0.478 | 4.42E-03 |
| cg18936744 | 14 | 96858458  | GeneBody/5'UTR/1st exon   | AK7       | -4.472±0.502 | -4.853±0.654 | 2.08E-03 |
| cg07016325 | 14 | 96968745  | GeneBody/5'UTR/1st exon   | PAPOLA    | -5.98±0.685  | -6.424±0.683 | 4.91E-03 |
| cg06906435 | 14 | 99177777  | TSS200                    | C14orf177 | 0.34±0.703   | -0.199±0.993 | 2.44E-03 |
| cg24169915 | 14 | 99177987  | GeneBody/5'UTR/1st exon   | C14orf177 | -1.957±1.028 | -2.569±0.913 | 7.98E-03 |
| cg27559343 | 14 | 99947096  | GeneBody/5'UTR/1st exon   | SETD3     | -4.737±0.36  | -5.072±0.516 | 2.87E-04 |
| cg05602615 | 14 | 99947482  | TSS1500                   | CENK      | -5.775±0.675 | -6.199±0.558 | 4.88E-03 |
| cg09002165 | 14 | 100772949 | TSS200                    | SLC25A29  | -5.175±0.485 | -5.5±0.711   | 8.93E-03 |
| cg14693893 | 14 | 102430593 | TSS1500                   | DYNC1H1   | -4.06±0.284  | -4.311±0.55  | 2.25E-03 |
| cg07672479 | 14 | 102431106 | GeneBody/1st exon         | DYNC1H1   | -5.284±0.543 | -5.843±0.691 | 4.07E-05 |
| cg10833014 | 14 | 102605952 | GeneBody/5'UTR/1st exon   | HSP90AA1  | -4.712±0.318 | -5.11±0.44   | 2.11E-06 |
| cg04281268 | 14 | 102606293 | GeneBody/1st exon         | WDR20     | -5.146±0.254 | -5.607±0.424 | 1.64E-09 |
| cg18211447 | 14 | 102771717 | TSS200                    | MOK       | -4.267±0.428 | -4.636±0.521 | 4.05E-04 |
| cg22474507 | 14 | 102829872 | GeneBody/5'UTR/1st intron | TECPR2    | -4.956±0.302 | -5.209±0.338 | 4.49E-04 |
| cg01333131 | 14 | 103524584 | TSS1500                   | CDC42BPB  | -2.658±0.323 | -2.413±0.5   | 3.72E-03 |
| cg22388943 | 14 | 103799756 | TSS1500                   | EIF5      | -4.773±0.219 | -5.033±0.435 | 6.45E-05 |
| cg18263030 | 14 | 103852417 | GeneBody/1st exon         | MARK3     | -4.727±0.398 | -5.091±0.602 | 4.48E-04 |
| cg15569512 | 14 | 104029667 | GeneBody/1st intron       | APOPT1    | -5.017±0.439 | -5.318±0.629 | 7.00E-03 |
| cg14083376 | 14 | 104388097 | TSS200                    | C14orf2   | -5.482±0.456 | -5.76±0.45   | 7.76E-03 |
| cg24404909 | 14 | 105175111 | GeneBody                  | INF2      | -3.307±0.516 | -3.69±0.611  | 1.99E-03 |
| cg12345724 | 14 | 105488366 | TSS1500                   | CDCA4     | -4.904±0.32  | -5.327±0.568 | 3.81E-06 |
| cg00105253 | 14 | 105647194 | GeneBody/1st intron       | NUDT14    | -3.549±0.281 | -3.82±0.361  | 1.15E-04 |
| cg03451296 | 14 | 105940391 | TSS1500                   | CRIP2     | -5.484±0.832 | -6.029±0.505 | 2.53E-03 |
| cg01753906 | 14 | 106140190 | TSS1500                   | ELK2AP    | 0.984±0.285  | 0.753±0.364  | 9.84E-04 |
| cg02507952 | 14 | 106390641 | GeneBody                  | KIAA0125  | 0.225±0.423  | -0.272±0.725 | 2.40E-05 |
| cg22432269 | 15 | 22892697  | GeneBody/5'UTR/1st exon   | CYFIP1    | -5.652±0.563 | -6.006±0.639 | 7.88E-03 |
| cg16131766 | 15 | 23810280  | TSS200                    | MKRN3     | 1.264±0.492  | 0.735±0.819  | 8.31E-05 |
| cg04014889 | 15 | 23890593  | GeneBody/1st exon         | MAGEL2    | 1.93±0.463   | 1.518±0.824  | 1.34E-03 |
| cg21325760 | 15 | 23891402  | GeneBody/1st exon         | MAGEL2    | 3.551±0.412  | 3.258±0.55   | 4.08E-03 |
| cg19195724 | 15 | 25287297  | 0                         | 0         | 1.578±0.507  | 1.036±0.687  | 2.93E-05 |
| cg12572011 | 15 | 25684085  | GeneBody/5'UTR/1st exon   | UBE3A     | -5.099±0.379 | -5.38±0.554  | 3.67E-03 |
| cg00792740 | 15 | 25684488  | TSS1500                   | UBE3A     | -3.668±0.23  | -3.947±0.318 | 3.88E-06 |
| cg27458888 | 15 | 25684578  | TSS1500                   | UBE3A     | -4.484±0.351 | -4.77±0.472  | 1.12E-03 |
| cg27592112 | 15 | 27670095  | GeneBody                  | GABRG3    | 2.178±0.62   | 1.736±0.846  | 4.32E-03 |
| cg24244000 | 15 | 27670335  | GeneBody                  | GABRG3    | 1.109±0.797  | 0.486±0.883  | 9.83E-04 |
| cg00955451 | 15 | 29213640  | TSS200                    | APBA2     | 1.425±0.354  | 1.119±0.742  | 4.30E-03 |
| cg17186444 | 15 | 29561501  | GeneBody/1st exon         | NDNL2     | -5.11±0.303  | -5.46±0.495  | 2.29E-05 |
| cg01665633 | 15 | 29562142  | TSS200                    | NDNL2     | -4.539±0.445 | -4.921±0.415 | 2.22E-04 |
| cg01939479 | 15 | 31195982  | TSS200                    | FAN1      | -4.277±0.802 | -4.756±0.707 | 7.77E-03 |
| cg18721882 | 15 | 32907058  | TSS1500                   | ARHGAP11A | -4.292±0.362 | -4.671±0.528 | 5.82E-05 |
| cg05898356 | 15 | 32908088  | GeneBody/5'UTR/1st exon   | ARHGAP11A | -4.371±0.482 | -4.687±0.43  | 3.71E-03 |
| cg08722720 | 15 | 34331557  | TSS1500                   | AVEN      | -4.073±0.208 | -4.288±0.373 | 2.36E-04 |
| cg27379417 | 15 | 34394218  | TSS200                    | PGBD4     | -4.884±0.483 | -5.231±0.489 | 1.95E-03 |
| cg11039072 | 15 | 35280907  | TSS1500                   | ZNF770    | -4.396±0.363 | -4.731±0.416 | 1.42E-04 |
| cg18372353 | 15 | 35838733  | TSS1500                   | DPH6      | -5.108±0.569 | -5.454±0.538 | 7.29E-03 |

|            |    |          |                           |           |              |              |          |
|------------|----|----------|---------------------------|-----------|--------------|--------------|----------|
| cg05861661 | 15 | 38746192 | TSS200                    | FAM98B    | -4.272±0.501 | -4.58±0.509  | 7.64E-03 |
| cg06952236 | 15 | 38856341 | GeneBody/1st intron       | RASGRP1   | -4.249±0.42  | -4.667±0.378 | 2.65E-05 |
| cg07466531 | 15 | 40331758 | GeneBody/1st intron       | SRP14-AS1 | -4.695±0.378 | -5.051±0.532 | 2.23E-04 |
| cg10563284 | 15 | 40531152 | TSS200                    | PAK6      | -4.387±0.417 | -4.709±0.537 | 1.69E-03 |
| cg23228048 | 15 | 40732820 | TSS1500                   | BAHD1     | -4.1±0.504   | -4.452±0.383 | 1.67E-03 |
| cg07114024 | 15 | 40733806 | GeneBody/5'UTR/1st intron | BAHD1     | -4.563±0.354 | -4.86±0.54   | 1.28E-03 |
| cg20314325 | 15 | 40886501 | GeneBody/5'UTR/1st exon   | CASC5     | -5.168±0.429 | -5.474±0.391 | 1.68E-03 |
| cg21465754 | 15 | 40986872 | GeneBody                  | RAD51-AS1 | -5.419±0.528 | -5.881±0.604 | 2.77E-04 |
| cg04662451 | 15 | 40987790 | GeneBody/5'UTR/1st intron | RAD51     | -4.516±0.371 | -4.764±0.392 | 4.15E-03 |
| cg05019152 | 15 | 41047360 | GeneBody/5'UTR/1st exon   | RMDN3     | -5.409±0.426 | -5.692±0.513 | 5.72E-03 |
| cg23424268 | 15 | 41056053 | TSS1500                   | GCHFR     | -5.101±0.358 | -5.536±0.519 | 4.87E-06 |
| cg09264112 | 15 | 41056369 | GeneBody/5'UTR/1st exon   | GCHFR     | -4.961±0.427 | -5.407±0.554 | 3.42E-05 |
| cg15059511 | 15 | 41099719 | TSS200                    | DNAJC17   | -4.983±0.35  | -5.207±0.374 | 6.12E-03 |
| cg26491425 | 15 | 41166632 | TSS200                    | RHOV      | -3.447±0.504 | -3.765±0.558 | 7.10E-03 |
| cg11324740 | 15 | 41624793 | GeneBody/5'UTR/1st exon   | OIP5      | -4.288±0.41  | -4.576±0.633 | 7.14E-03 |
| cg18809151 | 15 | 41694502 | GeneBody/1st exon         | NDUFAF1   | -4.761±0.305 | -5.095±0.503 | 5.92E-05 |
| cg12460541 | 15 | 41785560 | TSS1500                   | ITPKA     | -2.585±0.409 | -2.125±0.442 | 5.67E-06 |
| cg26052367 | 15 | 42566151 | TSS1500                   | GANC      | -4.361±0.414 | -4.62±0.488  | 8.81E-03 |
| cg04999036 | 15 | 42566375 | GeneBody/5'UTR/1st exon   | GANC      | -4.089±0.335 | -4.308±0.466 | 9.19E-03 |
| cg02126638 | 15 | 42840787 | GeneBody/5'UTR/1st intron | LRRC57    | -5.205±0.341 | -5.538±0.556 | 2.78E-04 |
| cg09296044 | 15 | 43477606 | GeneBody/1st exon         | CCNDBP1   | -5.251±0.67  | -5.734±0.634 | 1.64E-03 |
| cg26918442 | 15 | 43622840 | TSS200                    | LCMT2     | -5.719±0.481 | -6.123±0.581 | 5.38E-04 |
| cg27015174 | 15 | 43622946 | GeneBody/5'UTR/1st exon   | ADAL      | -5.268±0.513 | -5.621±0.538 | 3.12E-03 |
| cg12032620 | 15 | 43802735 | TSS200                    | TP53BP1   | -5.083±0.495 | -5.478±0.805 | 2.82E-03 |
| cg09020461 | 15 | 43802885 | TSS200                    | TP53BP1   | -5.547±0.383 | -5.778±0.368 | 8.11E-03 |
| cg23790767 | 15 | 44069451 | GeneBody/5'UTR/1st exon   | ELL3      | -5.874±0.559 | -6.342±0.587 | 3.81E-04 |
| cg03835332 | 15 | 44069518 | TSS200                    | ELL3      | -3.936±0.232 | -3.759±0.235 | 1.01E-03 |
| cg18997990 | 15 | 44084145 | TSS200                    | SERF2     | -3.425±0.512 | -3.733±0.533 | 9.27E-03 |
| cg23074453 | 15 | 44487924 | TSS1500                   | FRMD5     | -3.783±0.358 | -4.027±0.427 | 4.51E-03 |
| cg27649764 | 15 | 44719030 | TSS1500                   | CTDSP2    | -5.363±0.546 | -5.726±0.563 | 4.18E-03 |
| cg10891025 | 15 | 44828937 | GeneBody/1st intron       | EIF3J-AS1 | -4.6±0.314   | -4.888±0.401 | 2.24E-04 |
| cg06121469 | 15 | 44956098 | TSS1500                   | SPG11     | -4.372±0.297 | -4.752±0.441 | 2.03E-06 |
| cg03355298 | 15 | 45003704 | GeneBody/5'UTR/1st exon   | B2M       | -6.028±0.561 | -6.409±0.565 | 3.30E-03 |
| cg21132104 | 15 | 45694354 | TSS200                    | SPATA5L1  | -4.177±0.536 | -4.698±0.55  | 4.88E-05 |
| cg03079549 | 15 | 45879223 | TSS200                    | BLOC1S6   | -5.326±0.368 | -5.955±0.665 | 1.95E-08 |
| cg09593286 | 15 | 45926878 | TSS200                    | SQRDL     | -4.03±0.306  | -4.241±0.276 | 2.38E-03 |
| cg17428950 | 15 | 45927554 | GeneBody/5'UTR/1st intron | SQRDL     | -5.138±0.438 | -5.433±0.434 | 2.92E-03 |
| cg16016951 | 15 | 48624163 | TSS1500                   | DUT       | -5.314±0.622 | -5.869±0.622 | 1.59E-04 |
| cg27584171 | 15 | 49338887 | TSS200                    | SECISBP2L | -5.006±0.55  | -5.468±0.559 | 3.51E-04 |
| cg14317651 | 15 | 49448126 | GeneBody/5'UTR/1st exon   | GALK2     | -4.58±0.45   | -4.969±0.598 | 5.31E-04 |
| cg01443067 | 15 | 50716755 | GeneBody/5'UTR/1st exon   | USP8      | -4.962±0.343 | -5.243±0.546 | 1.99E-03 |
| cg15683743 | 15 | 51057417 | GeneBody/1st intron       | SPPL2A    | -4.206±0.651 | -4.741±0.679 | 4.81E-04 |
| cg13501507 | 15 | 51915413 | TSS1500                   | DMXL2     | -4.775±0.377 | -5.261±0.575 | 2.11E-06 |
| cg16695354 | 15 | 52030164 | GeneBody/5'UTR/1st exon   | LYSMD2    | -4.388±0.58  | -4.833±0.608 | 1.05E-03 |
| cg16275172 | 15 | 52121933 | GeneBody/5'UTR/1st exon   | TMOD3     | -5.517±0.412 | -5.844±0.475 | 8.96E-04 |
| cg23865067 | 15 | 52860622 | GeneBody/1st intron       | ARPP19    | -4.198±0.285 | -4.381±0.236 | 4.09E-03 |
| cg03878377 | 15 | 55489120 | GeneBody/5'UTR/1st exon   | RSL24D1   | -5.066±0.377 | -5.579±0.567 | 6.87E-07 |
| cg05761032 | 15 | 55700743 | GeneBody/5'UTR/1st exon   | C15orf65  | -4.582±0.309 | -4.88±0.472  | 2.43E-04 |
| cg09498379 | 15 | 56285741 | GeneBody/1st exon         | NEDD4     | -6.663±0.552 | -7.087±0.654 | 1.42E-03 |
| cg06253734 | 15 | 59042325 | TSS200                    | ADAM10    | -4.565±0.355 | -4.873±0.47  | 5.05E-04 |
| cg06307422 | 15 | 59279994 | GeneBody/5'UTR/1st exon   | RNF111    | -5.08±0.36   | -5.545±0.456 | 7.73E-07 |
| cg13917394 | 15 | 59397341 | GeneBody/5'UTR/1st exon   | CCNB2     | -5.264±0.445 | -5.77±0.665  | 1.78E-05 |
| cg19636871 | 15 | 59499391 | GeneBody/1st exon         | LDHAL6B   | 3.458±0.319  | 3.18±0.447   | 6.02E-04 |
| cg24088751 | 15 | 59949482 | GeneBody/5'UTR/1st intron | GTF2A2    | -4.28±0.284  | -4.589±0.383 | 2.30E-05 |
| cg17563769 | 15 | 59949922 | TSS200                    | GTF2A2    | -3.919±0.516 | -4.321±0.744 | 2.23E-03 |
| cg11939047 | 15 | 60771213 | GeneBody/5'UTR/1st exon   | NARG2     | -5.593±0.469 | -6.041±0.563 | 1.00E-04 |
| cg13804457 | 15 | 60771615 | TSS1500                   | NARG2     | -4.193±0.367 | -4.532±0.492 | 2.34E-04 |
| cg25808839 | 15 | 63414067 | GeneBody/5'UTR/1st exon   | LACTB     | -5.552±0.651 | -6.108±0.78  | 4.35E-04 |
| cg17556578 | 15 | 63481415 | TSS1500                   | RAB8B     | -5.641±0.65  | -6.16±0.665  | 6.51E-04 |
| cg23311628 | 15 | 63481868 | GeneBody/1st exon         | RAB8B     | -5.608±0.455 | -6.005±0.626 | 5.31E-04 |
| cg13401987 | 15 | 63569418 | TSS1500                   | APH1B     | -6.091±0.534 | -6.565±0.631 | 2.58E-04 |
| cg01176271 | 15 | 64388259 | GeneBody/1st exon         | SNX1      | -5.408±0.562 | -5.765±0.666 | 7.77E-03 |
| cg00810473 | 15 | 64443709 | TSS1500                   | SNX22     | -4.801±0.268 | -5.093±0.42  | 4.65E-05 |
| cg09297361 | 15 | 64444268 | GeneBody/1st intron       | SNX22     | -4.388±0.48  | -4.679±0.413 | 6.70E-03 |
| cg16312647 | 15 | 64455677 | TSS1500                   | PPIB      | -4.648±0.347 | -5.142±0.519 | 2.62E-07 |
| cg01021485 | 15 | 64648224 | GeneBody/5'UTR/1st exon   | CSNK1G1   | -5.907±0.599 | -6.305±0.601 | 3.91E-03 |
| cg11823654 | 15 | 65117936 | TSS200                    | PIF1      | -4.526±0.435 | -4.802±0.528 | 8.28E-03 |
| cg25026754 | 15 | 65426128 | GeneBody/5'UTR/1st exon   | PDCD7     | -4.656±0.345 | -5.046±0.457 | 1.09E-05 |
| cg05179880 | 15 | 65426293 | TSS200                    | PDCD7     | -4.423±0.466 | -4.763±0.709 | 4.99E-03 |
| cg13704548 | 15 | 65714817 | GeneBody/1st intron       | IGDCC4    | -2.626±0.641 | -3.038±0.726 | 6.66E-03 |
| cg08291539 | 15 | 66084447 | GeneBody/5'UTR/1st exon   | DENND4A   | -5.641±0.604 | -6.041±0.693 | 5.20E-03 |
| cg15125634 | 15 | 66161842 | GeneBody/5'UTR/1st exon   | RAB11A    | -4.63±0.563  | -5.01±0.656  | 4.67E-03 |
| cg13133148 | 15 | 66790044 | GeneBody/1st exon         | SNAPC5    | -5.603±0.415 | -5.871±0.424 | 5.25E-03 |
| cg14556189 | 15 | 67358639 | GeneBody/1st exon         | SMAD3     | -5.585±0.375 | -5.96±0.493  | 7.23E-05 |
| cg12246527 | 15 | 67834730 | TSS1500                   | MAP2K5    | -4.483±0.358 | -4.8±0.46    | 3.62E-04 |
| cg06188683 | 15 | 69113451 | TSS200                    | ANP32A    | -5.66±0.614  | -6.06±0.643  | 5.03E-03 |
| cg09656405 | 15 | 69745057 | TSS200                    | RPLP1     | -5.552±0.34  | -5.811±0.448 | 2.08E-03 |
| cg15025769 | 15 | 72410003 | GeneBody/5'UTR/1st intron | MYO9A     | -5.569±0.682 | -6.212±0.541 | 4.75E-05 |
| cg16778903 | 15 | 72612567 | TSS200                    | CELF6     | -4.405±0.805 | -4.943±0.438 | 1.97E-03 |
| cg05697231 | 15 | 74286614 | GeneBody/5'UTR/1st intron | STOML1    | -3.439±0.231 | -3.638±0.333 | 7.63E-04 |
| cg00964109 | 15 | 74753785 | GeneBody/1st exon         | UBL7-AS1  | -5.433±0.517 | -5.762±0.542 | 6.05E-03 |
| cg02299279 | 15 | 74753787 | GeneBody/1st exon         | UBL7-AS1  | -6.084±0.599 | -6.664±0.705 | 7.67E-05 |
| cg22290566 | 15 | 75105286 | GeneBody/1st exon         | LMAN1L    | 2.099±0.322  | 2.306±0.443  | 9.95E-03 |
| cg18502522 | 15 | 75165624 | GeneBody/5'UTR/1st exon   | SCAMP2    | -5.098±0.431 | -5.42±0.53   | 2.08E-03 |
| cg04249030 | 15 | 75230004 | GeneBody/1st intron       | COX5A     | -5.812±0.501 | -6.247±0.5   | 2.26E-04 |
| cg14209569 | 15 | 75628553 | GeneBody/1st intron       | COMMD4    | -4.715±0.502 | -5.066±0.617 | 3.80E-03 |
| cg25985103 | 15 | 75660389 | GeneBody                  | MAN2C1    | -2.654±0.411 | -2.944±0.455 | 2.73E-03 |
| cg15809230 | 15 | 75743753 | GeneBody/5'UTR/1st exon   | SIN3A     | -5.338±0.619 | -5.835±0.698 | 7.49E-04 |
| cg04137128 | 15 | 75744262 | TSS200                    | SIN3A     | -4.126±0.433 | -4.436±0.581 | 3.91E-03 |
| cg25429010 | 15 | 75932582 | GeneBody/5'UTR/1st exon   | IMP3      | -5.044±0.395 | -5.308±0.452 | 4.99E-03 |
| cg02357725 | 15 | 75932598 | GeneBody/5'UTR/1st exon   | IMP3      | -4.293±0.284 | -4.623±0.39  | 8.14E-06 |
| cg21250577 | 15 | 76603657 | GeneBody/1st intron       | ETFA      | -4.358±0.341 | -4.624±0.539 | 3.06E-03 |
| cg05922972 | 15 | 77362853 | GeneBody/1st intron       | TPAN3     | -5.412±0.586 | -5.775±0.585 | 6.98E-03 |
| cg26190136 | 15 | 78441442 | TSS1500                   | IDH3A     | -3.897±0.422 | -4.211±0.599 | 3.28E-03 |
| cg21223368 | 15 | 78441812 | GeneBody/1st intron       | IDH3A     | -5.303±0.539 | -5.619±0.511 | 9.94E-03 |

|             |    |           |                           |           |              |              |          |
|-------------|----|-----------|---------------------------|-----------|--------------|--------------|----------|
| cg25229015  | 15 | 78591883  | GeneBody/5'UTR/1st intron | WDR61     | -5.007±0.348 | -5.322±0.492 | 3.76E-04 |
| cg15563993  | 15 | 78592154  | TSS1500                   | WDR61     | -4.795±0.353 | -5.235±0.492 | 2.38E-06 |
| cg22916109  | 15 | 78730334  | TSS200                    | IREB2     | -5.557±0.555 | -6.047±0.576 | 1.95E-04 |
| cg26674929  | 15 | 78730741  | GeneBody/1st intron       | IREB2     | -5.959±0.494 | -6.355±0.62  | 1.05E-03 |
| cg13782957  | 15 | 78832906  | GeneBody/5'UTR/1st intron | PSMA4     | -4.435±0.384 | -4.655±0.289 | 9.03E-03 |
| cg06746101  | 15 | 79603771  | GeneBody/1st intron       | TMED3     | -5.391±0.397 | -5.638±0.397 | 6.83E-03 |
| cg23855392  | 15 | 80189782  | TSS200                    | MTHFS     | -3.684±0.487 | -4.093±0.592 | 5.42E-04 |
| cg10829134  | 15 | 80352620  | GeneBody/5'UTR/1st intron | ZFAND6    | -5.782±0.429 | -6.196±0.523 | 8.89E-05 |
| cg07699440  | 15 | 80445357  | GeneBody/5'UTR/1st exon   | FAH       | -5.334±0.383 | -5.688±0.534 | 2.69E-04 |
| cg01578341  | 15 | 82338527  | TSS200                    | MEX3B     | -4.036±0.544 | -4.409±0.588 | 3.41E-03 |
| cg08757531  | 15 | 83654895  | TSS200                    | FAM103A1  | -5.075±0.391 | -5.49±0.482  | 2.17E-05 |
| cg12435359  | 15 | 83735668  | TSS1500                   | MIR4515   | -6.018±0.602 | -6.477±0.677 | 1.31E-03 |
| cg16958189  | 15 | 83736204  | TSS200                    | BTBD1     | -3.956±0.297 | -4.232±0.38  | 1.85E-04 |
| cg05905876  | 15 | 85259824  | TSS200                    | SEC11A    | -5.505±0.68  | -5.956±0.701 | 4.20E-03 |
| cg23838179  | 15 | 85291191  | TSS1500                   | ZNF592    | -5.27±0.546  | -5.64±0.421  | 6.08E-03 |
| cg08211967  | 15 | 85923708  | TSS200                    | AKAP13    | -4.578±0.281 | -4.863±0.346 | 4.56E-05 |
| cg00256166  | 15 | 86338428  | TSS1500                   | KLHL25    | -4.186±0.271 | -4.426±0.396 | 5.67E-04 |
| cg17732044  | 15 | 90234207  | GeneBody/5'UTR/1st intron | WDR93     | -4.968±0.487 | -5.352±0.651 | 1.54E-03 |
| cg11468711  | 15 | 90545745  | GeneBody/5'UTR/1st intron | ZNF710    | -5.389±0.514 | -5.865±0.583 | 1.29E-04 |
| cg17925542  | 15 | 90646157  | TSS1500                   | IDH2      | -4.657±0.538 | -5.068±0.626 | 1.40E-03 |
| cg05641961  | 15 | 90776927  | GeneBody                  | CIB1      | -4.823±0.385 | -5.247±0.49  | 1.40E-05 |
| cg23979923  | 15 | 90777592  | GeneBody/5'UTR/1st intron | GDPGP1    | -4.713±0.401 | -5.061±0.508 | 4.35E-04 |
| cg07364638  | 15 | 90808673  | TSS1500                   | NGRN      | -5.235±0.354 | -5.77±0.599  | 1.74E-07 |
| cg17891123  | 15 | 90931113  | TSS1500                   | IQGAP1    | -1.958±0.188 | -2.111±0.217 | 7.09E-04 |
| cg10978402  | 15 | 90931990  | GeneBody/1st intron       | IQGAP1    | -5.986±0.543 | -6.355±0.571 | 3.49E-03 |
| cg12467864  | 15 | 91537971  | TSS200                    | PRC1      | -5.98±0.518  | -6.547±0.641 | 1.40E-05 |
| cg26677874  | 15 | 99791930  | GeneBody/5'UTR/1st intron | LRRC28    | -5.275±0.435 | -5.58±0.391  | 2.02E-03 |
| cg23448096  | 15 | 100273505 | GeneBody/5'UTR/1st intron | LYSMD4    | -5.289±0.543 | -5.619±0.487 | 6.92E-03 |
| cg11653271  | 16 | 103723    | TSS200                    | POLR3K    | -5.346±0.452 | -5.673±0.751 | 7.18E-03 |
| cg01687051  | 16 | 278852    | GeneBody/1st intron       | LUC7L     | -4.506±0.371 | -4.897±0.511 | 4.04E-05 |
| cg26762198  | 16 | 284647    | TSS200                    | ITFG3     | -5.355±0.407 | -5.791±0.64  | 6.25E-05 |
| cg12197254  | 16 | 285158    | GeneBody/5'UTR/1st intron | ITFG3     | -4.095±0.253 | -4.436±0.398 | 1.17E-06 |
| cg01352882  | 16 | 730130    | GeneBody/5'UTR/1st exon   | STUB1     | -5.194±0.578 | -5.67±0.634  | 5.31E-04 |
| cg09852871  | 16 | 739598    | GeneBody/1st exon         | WDR24     | 2.376±0.553  | 2.022±0.695  | 8.44E-03 |
| cg00488300  | 16 | 1276490   | TSS1500                   | TPSG1     | 2.318±0.451  | 1.985±0.712  | 5.03E-03 |
| cg10960946  | 16 | 1359179   | GeneBody/5'UTR/1st exon   | UBE2I     | -6.186±0.579 | -6.738±0.722 | 1.14E-04 |
| cg16236759  | 16 | 1359182   | GeneBody/5'UTR/1st exon   | UBE2I     | -4.693±0.341 | -5.123±0.562 | 5.68E-06 |
| cg01979004  | 16 | 1401195   | GeneBody                  | TSR3      | -4.307±0.402 | -4.643±0.458 | 5.01E-04 |
| cg04979725  | 16 | 1464225   | GeneBody/1st intron       | UNKL      | -5.03±0.556  | -5.421±0.63  | 2.98E-03 |
| cg25459778  | 16 | 1664582   | TSS200                    | CRAMP1L   | -5.341±0.904 | -5.903±0.972 | 7.68E-03 |
| cg01723747  | 16 | 1727942   | TSS1500                   | HN1L      | -3.583±0.708 | -4.142±0.811 | 9.39E-04 |
| cg08708323  | 16 | 1728724   | GeneBody/1st intron       | HN1L      | -4.16±0.393  | -4.452±0.667 | 6.26E-03 |
| cg01100784  | 16 | 1756771   | GeneBody/1st intron       | MAPK8IP3  | -5.065±0.444 | -5.361±0.462 | 4.11E-03 |
| cg01729862  | 16 | 1824041   | GeneBody                  | EME2      | -4.487±0.391 | -4.842±0.612 | 5.66E-04 |
| cg03700218  | 16 | 1832709   | TSS200                    | SPSB3     | -4.689±0.544 | -5.184±0.511 | 1.05E-04 |
| cg26675934  | 16 | 2009675   | GeneBody/1st exon         | NDUFB10   | -5.619±0.452 | -6.155±0.656 | 7.50E-06 |
| cg23998987  | 16 | 2021791   | TSS1500                   | TBL3      | -4.865±0.543 | -5.231±0.709 | 6.19E-03 |
| cg14297700  | 16 | 2022287   | GeneBody/1st intron       | TBL3      | -5.448±0.544 | -5.802±0.618 | 5.98E-03 |
| cg15643724  | 16 | 2034532   | GeneBody/1st intron       | GFER      | -3.99±0.218  | -4.255±0.354 | 9.09E-06 |
| cg05243909  | 16 | 2097910   | TSS200                    | NTHL1     | -4.448±0.304 | -4.252±0.337 | 6.19E-03 |
| cg27176536  | 16 | 2198395   | TSS1500                   | RAB26     | -1.908±0.155 | -2.062±0.225 | 1.20E-04 |
| cg04490516  | 16 | 2255169   | TSS200                    | MLST8     | -3.628±0.345 | -3.865±0.478 | 6.29E-03 |
| cg09615982  | 16 | 2273300   | TSS1500                   | E4F1      | -5.12±0.509  | -5.492±0.558 | 1.95E-03 |
| cg05824432  | 16 | 2301222   | GeneBody                  | ECI1      | -5.406±0.332 | -5.736±0.55  | 2.43E-04 |
| cg20886062  | 16 | 2301787   | TSS200                    | ECI1      | -4.892±0.405 | -5.291±0.472 | 5.79E-05 |
| cg06361108  | 16 | 2478781   | TSS1500                   | CCNF      | -5.348±0.921 | -5.885±0.793 | 9.00E-03 |
| cg06689536  | 16 | 2480094   | GeneBody/1st intron       | CCNF      | -4.652±0.331 | -5.011±0.405 | 1.53E-05 |
| cg22499237  | 16 | 2587546   | TSS1500                   | PDPK1     | -4.566±0.384 | -4.832±0.52  | 5.37E-03 |
| cg011195053 | 16 | 2653274   | TSS200                    | LOC652276 | -3.603±0.486 | -4.129±0.73  | 4.13E-05 |
| cg07195622  | 16 | 2803408   | TSS1500                   | SRRM2-AS1 | -3.927±0.301 | -4.355±0.437 | 2.16E-07 |
| cg06090630  | 16 | 2827139   | GeneBody/1st intron       | TCEB2     | -5.588±0.431 | -5.971±0.59  | 4.15E-04 |
| cg18345369  | 16 | 2907859   | GeneBody/1st intron       | PRSS22    | -1.509±0.546 | -1.868±0.695 | 7.06E-03 |
| cg19328294  | 16 | 2908554   | TSS1500                   | PRSS22    | -3.012±0.452 | -3.326±0.524 | 3.49E-03 |
| cg20712430  | 16 | 3013923   | TSS1500                   | KREMEN2   | -4.432±0.312 | -4.741±0.441 | 1.16E-04 |
| cg15460516  | 16 | 3070249   | TSS200                    | TNFRSF12A | -5.363±0.44  | -5.864±0.553 | 7.46E-06 |
| cg16657615  | 16 | 3070630   | GeneBody/1st intron       | TNFRSF12A | -4.006±0.253 | -4.172±0.334 | 7.74E-03 |
| cg02062650  | 16 | 3074537   | TSS1500                   | HCFC1R1   | -3.97±0.38   | -4.29±0.488  | 6.25E-04 |
| cg05225996  | 16 | 3163017   | GeneBody/5'UTR/1st intron | ZNF205    | -2.176±0.456 | -2.495±0.702 | 7.24E-03 |
| cg19703826  | 16 | 3185452   | GeneBody/5'UTR/1st intron | ZNF213    | -4.349±0.571 | -4.73±0.479  | 2.95E-03 |
| cg16807989  | 16 | 3253749   | TSS1500                   | OR1F1     | 2.908±0.422  | 2.532±0.614  | 5.25E-04 |
| cg07879977  | 16 | 3254567   | GeneBody/1st exon         | OR1F1     | 0.261±0.548  | -0.212±0.803 | 7.94E-04 |
| cg17171916  | 16 | 3333486   | GeneBody/5'UTR/1st exon   | ZNF263    | -5.415±0.65  | -5.966±0.726 | 3.88E-04 |
| cg23412875  | 16 | 3333539   | GeneBody/5'UTR/1st exon   | ZNF263    | -5.193±0.418 | -5.492±0.716 | 8.85E-03 |
| cg11720778  | 16 | 3351073   | GeneBody/5'UTR            | TIGD7     | 2.63±0.279   | 2.82±0.227   | 2.38E-03 |
| cg13919607  | 16 | 3451181   | TSS200                    | ZNF174    | -5.043±0.326 | -5.464±0.488 | 1.84E-06 |
| cg04211818  | 16 | 3661492   | GeneBody/5'UTR/1st intron | SLX4      | -5.646±0.291 | -6.018±0.555 | 1.34E-05 |
| cg10609615  | 16 | 3766942   | GeneBody/1st intron       | TRAP1     | -4.554±0.438 | -4.889±0.557 | 1.76E-03 |
| cg12645567  | 16 | 4322414   | GeneBody/1st intron       | TFAP4     | -5.07±0.367  | -5.511±0.553 | 7.49E-06 |
| cg10396357  | 16 | 4323326   | TSS1500                   | TFAP4     | -4.782±0.334 | -5.19±0.644  | 3.08E-05 |
| cg04629269  | 16 | 4401449   | TSS200                    | PAM16     | -4.989±0.44  | -5.425±0.675 | 1.69E-04 |
| cg00519627  | 16 | 4466650   | GeneBody/5'UTR/1st exon   | CORO7     | -5.616±0.579 | -6.145±0.62  | 1.34E-04 |
| cg21038229  | 16 | 4527005   | GeneBody/5'UTR/1st intron | HMOX2     | -4.355±0.336 | -4.648±0.528 | 9.31E-04 |
| cg01261535  | 16 | 4897216   | GeneBody/1st intron       | GLYR1     | -5.039±0.442 | -5.604±0.7   | 3.18E-06 |
| cg13516796  | 16 | 5122251   | GeneBody/1st intron       | ALG1      | -4.439±0.364 | -4.714±0.431 | 1.63E-03 |
| cg10957584  | 16 | 5148097   | TSS1500                   | FAM86A    | -5.098±0.532 | -5.489±0.584 | 1.82E-03 |
| cg20587543  | 16 | 8768110   | TSS1500                   | ABAT      | -4.111±0.677 | -4.591±0.565 | 1.62E-03 |
| cg12529801  | 16 | 9184705   | TSS1500                   | C16orf72  | -5.316±0.424 | -5.601±0.565 | 6.49E-03 |
| cg01808090  | 16 | 10837891  | GeneBody                  | NUBP1     | -4.768±0.58  | -5.132±0.499 | 5.22E-03 |
| cg23970785  | 16 | 11036526  | TSS1500                   | DEX1      | -5.058±0.644 | -5.519±0.721 | 2.45E-03 |
| cg06295404  | 16 | 11350337  | TSS1500                   | SOCS1     | -3.742±0.437 | -4.051±0.607 | 4.79E-03 |
| cg26301908  | 16 | 11350915  | TSS1500                   | SOCS1     | -4.449±0.244 | -4.649±0.458 | 3.91E-03 |
| cg08268266  | 16 | 11680284  | TSS200                    | LITAF     | -3.69±0.43   | -3.863±0.656 | 3.30E-05 |
| cg13908977  | 16 | 11945749  | TSS1500                   | RSL1D1    | -5.161±0.411 | -5.424±0.408 | 5.23E-03 |
| cg10784067  | 16 | 14014435  | GeneBody/1st intron       | ERCC4     | -4.757±0.55  | -5.161±0.69  | 2.57E-03 |
| cg14060060  | 16 | 15068476  | TSS1500                   | PDXDC1    | -4.686±0.351 | -5.085±0.494 | 1.29E-05 |

|            |    |          |                           |                   |              |              |          |
|------------|----|----------|---------------------------|-------------------|--------------|--------------|----------|
| cg06734828 | 16 | 15069433 | GeneBody/1st intron       | <i>PDXDC1</i>     | -5.485±0.292 | -5.698±0.323 | 2.01E-03 |
| cg22874960 | 16 | 15737314 | GeneBody/5'UTR/1st exon   | <i>NDE1</i>       | -4.33±0.396  | -4.607±0.494 | 3.91E-03 |
| cg21321885 | 16 | 15744194 | GeneBody/5'UTR/1st intron | <i>NDE1</i>       | -5.864±0.423 | -6.403±0.606 | 1.86E-06 |
| cg06490162 | 16 | 15982174 | GeneBody/1st intron       | <i>FOPNL</i>      | -5.134±0.302 | -5.34±0.329  | 3.60E-03 |
| cg16299616 | 16 | 18573628 | TSS200                    | <i>NOMO2</i>      | -4.279±0.368 | -4.582±0.457 | 7.29E-04 |
| cg21024145 | 16 | 18801635 | GeneBody/5'UTR/1st exon   | <i>RPS15A</i>     | -5.442±0.439 | -5.748±0.494 | 3.30E-03 |
| cg07295034 | 16 | 18937261 | GeneBody/1st intron       | <i>SMG1</i>       | -4.307±0.349 | -4.62±0.418  | 2.32E-04 |
| cg21657816 | 16 | 19079446 | GeneBody/5'UTR/1st intron | <i>COQ7</i>       | -5.316±0.403 | -5.704±0.671 | 3.84E-04 |
| cg12454725 | 16 | 19179231 | TSS1500                   | <i>SYT17</i>      | -5.128±0.623 | -5.701±0.543 | 7.87E-05 |
| cg19238840 | 16 | 20339175 | TSS1500                   | <i>GP2</i>        | -1.241±0.606 | -1.618±0.625 | 7.21E-03 |
| cg07456201 | 16 | 20363711 | GeneBody/5'UTR/1st intron | <i>UMOD</i>       | 0.918±0.671  | 0.386±0.83   | 1.28E-03 |
| cg26825755 | 16 | 20587568 | GeneBody/5'UTR/1st exon   | <i>ACSM2B</i>     | -1.854±0.572 | -2.247±0.662 | 3.89E-03 |
| cg26399035 | 16 | 20753649 | TSS1500                   | <i>THUMPD1</i>    | 0.569±0.502  | 0.266±0.549  | 9.91E-03 |
| cg21644826 | 16 | 20775352 | GeneBody/5'UTR/1st exon   | <i>ACSM3</i>      | -3.524±0.438 | -3.836±0.452 | 2.19E-03 |
| cg07314549 | 16 | 20817501 | TSS1500                   | <i>LOC81691</i>   | -4.481±0.3   | -4.752±0.422 | 3.86E-04 |
| cg06039624 | 16 | 20818068 | TSS1500                   | <i>ERI2</i>       | -5.127±0.547 | -5.508±0.576 | 2.79E-03 |
| cg26424013 | 16 | 20911827 | TSS1500                   | <i>LYRM1</i>      | -6.226±0.572 | -6.931±0.706 | 1.75E-06 |
| cg15786879 | 16 | 21169615 | TSS1500                   | <i>TMEM159</i>    | -4.063±0.422 | -4.334±0.491 | 6.93E-03 |
| cg10379112 | 16 | 21169738 | TSS200                    | <i>TMEM159</i>    | -4.494±0.223 | -4.754±0.532 | 3.75E-04 |
| cg09935540 | 16 | 21170428 | GeneBody/1st intron       | <i>DNAH3</i>      | -4.462±0.571 | -4.882±0.687 | 2.26E-03 |
| cg27015931 | 16 | 22012404 | GeneBody/1st exon         | <i>PDZD9</i>      | -2.873±0.184 | -3.055±0.254 | 1.07E-04 |
| cg14028823 | 16 | 22218533 | GeneBody/5'UTR/1st intron | <i>EEF2K</i>      | -4.753±0.543 | -5.274±0.595 | 7.00E-05 |
| cg00069261 | 16 | 22386531 | TSS1500                   | <i>CDR2</i>       | -4.22±0.39   | -4.455±0.397 | 8.93E-03 |
| cg26809911 | 16 | 23464207 | GeneBody/1st exon         | <i>COG7</i>       | -4.607±0.307 | -4.99±0.439  | 2.64E-06 |
| cg27196102 | 16 | 23464713 | TSS1500                   | <i>COG7</i>       | -4.518±0.733 | -5.042±0.68  | 1.73E-03 |
| cg09060849 | 16 | 23521224 | GeneBody/1st intron       | <i>GA2</i>        | -3.915±0.492 | -4.246±0.643 | 6.27E-03 |
| cg02741249 | 16 | 23521983 | TSS200                    | <i>GA2</i>        | -4.295±0.404 | -4.546±0.421 | 7.31E-03 |
| cg04454391 | 16 | 23607818 | TSS200                    | <i>NDUFA81</i>    | -5.723±0.619 | -6.335±0.641 | 3.84E-05 |
| cg02735133 | 16 | 23652915 | GeneBody/1st intron       | <i>DCTN5</i>      | -5.995±0.585 | -6.412±0.646 | 2.50E-03 |
| cg16050957 | 16 | 24550743 | TSS200                    | <i>RBBP6</i>      | -5.789±0.5   | -6.231±0.572 | 2.46E-04 |
| cg27501380 | 16 | 24551577 | GeneBody/5'UTR/1st exon   | <i>RBBP6</i>      | -5.326±0.319 | -5.603±0.419 | 4.95E-04 |
| cg05689121 | 16 | 24740934 | TSS200                    | <i>TNRC6A</i>     | -4.121±0.241 | -4.453±0.42  | 1.54E-06 |
| cg24705286 | 16 | 27215306 | GeneBody/5'UTR/1st exon   | <i>KDM8</i>       | -5.524±0.612 | -6.046±0.686 | 3.69E-04 |
| cg09725013 | 16 | 27561559 | GeneBody/1st intron       | <i>KIAA0556</i>   | -5.534±0.411 | -5.875±0.385 | 3.40E-04 |
| cg22659426 | 16 | 28503060 | GeneBody/1st exon         | <i>CLN3</i>       | -5.301±0.517 | -5.678±0.385 | 1.06E-03 |
| cg06530118 | 16 | 28503379 | GeneBody/5'UTR/1st exon   | <i>CLN3</i>       | -4.541±0.268 | -4.911±0.398 | 4.42E-07 |
| cg14791831 | 16 | 28565295 | GeneBody/5'UTR/1st exon   | <i>CCDC101</i>    | -5.269±0.379 | -5.676±0.664 | 1.12E-04 |
| cg18530748 | 16 | 28634844 | GeneBody/5'UTR/1st exon   | <i>SULT1A1</i>    | -2.791±0.941 | -3.397±0.993 | 5.61E-03 |
| cg15774133 | 16 | 28722592 | TSS200                    | <i>EIF3C</i>      | -2.565±0.325 | -2.942±0.485 | 1.25E-05 |
| cg22973038 | 16 | 28857255 | GeneBody                  | <i>TUFM</i>       | -4.335±0.341 | -4.574±0.519 | 6.85E-03 |
| cg23517548 | 16 | 28962521 | GeneBody/1st exon         | <i>NFATC2IP</i>   | -4.975±0.521 | -5.304±0.523 | 6.09E-03 |
| cg27254601 | 16 | 29817104 | TSS1500                   | <i>MAZ</i>        | -5.723±0.527 | -6.053±0.571 | 7.24E-03 |
| cg23099347 | 16 | 29827497 | TSS200                    | <i>PAGR1</i>      | -5.371±0.377 | -5.751±0.519 | 7.85E-05 |
| cg02556718 | 16 | 29910594 | TSS200                    | <i>SEZ6L2</i>     | -4.62±0.685  | -5.177±0.788 | 6.84E-04 |
| cg01110846 | 16 | 29937190 | GeneBody/1st exon         | <i>KCTD13</i>     | -4.83±0.464  | -5.139±0.614 | 7.10E-03 |
| cg08256260 | 16 | 29937746 | TSS1500                   | <i>KCTD13</i>     | -5.503±0.474 | -5.853±0.482 | 1.50E-03 |
| cg10705951 | 16 | 29985294 | GeneBody/5'UTR/1st exon   | <i>TAOK2</i>      | -5.501±0.568 | -5.877±0.531 | 3.64E-03 |
| cg01311051 | 16 | 30064897 | GeneBody/5'UTR            | <i>ALDOA</i>      | -2.254±0.422 | -2.586±0.637 | 2.70E-03 |
| cg11970301 | 16 | 30087888 | GeneBody                  | <i>PPP4C</i>      | -4.077±0.443 | -4.529±0.52  | 3.41E-05 |
| cg03691812 | 16 | 30194416 | TSS1500                   | <i>CORO1A</i>     | -5.25±0.646  | -5.769±0.685 | 6.47E-04 |
| cg19981839 | 16 | 30366847 | TSS200                    | <i>CD2BP2</i>     | -4.249±0.498 | -4.628±0.68  | 2.30E-03 |
| cg17640201 | 16 | 30407289 | GeneBody/1st intron       | <i>ZNF48</i>      | -4.449±0.512 | -4.927±0.682 | 2.07E-04 |
| cg07842593 | 16 | 30457166 | GeneBody/5'UTR/1st exon   | <i>SEPHS2</i>     | -4.426±0.385 | -4.68±0.541  | 8.76E-03 |
| cg26295990 | 16 | 30538342 | TSS1500                   | <i>ZNF768</i>     | -4.259±0.368 | -4.545±0.408 | 1.06E-03 |
| cg13951948 | 16 | 30546188 | GeneBody/5'UTR/1st exon   | <i>ZNF747</i>     | -5.697±0.519 | -6.124±0.521 | 4.34E-04 |
| cg09438266 | 16 | 30569751 | TSS200                    | <i>ZNF764</i>     | -5.427±0.406 | -6.247±0.767 | 3.27E-10 |
| cg03942436 | 16 | 30583048 | GeneBody/1st intron       | <i>ZNF688</i>     | -4.737±0.346 | -5±0.58      | 4.87E-03 |
| cg07125009 | 16 | 30621667 | GeneBody/5'UTR/1st exon   | <i>ZNF689</i>     | -5.304±0.531 | -5.749±0.595 | 4.55E-04 |
| cg05467106 | 16 | 30621996 | GeneBody/1st exon         | <i>ZNF689</i>     | -4.769±0.429 | -5.043±0.442 | 5.71E-03 |
| cg15970621 | 16 | 30760244 | GeneBody                  | <i>PHKG2</i>      | -5.52±0.494  | -5.914±0.511 | 6.58E-04 |
| cg13150441 | 16 | 30774108 | TSS1500                   | <i>C16orf93</i>   | -3.556±0.515 | -3.218±0.703 | 8.30E-03 |
| cg08535091 | 16 | 30934696 | TSS200                    | <i>FBXL19-AS1</i> | -6.423±0.534 | -6.759±0.577 | 7.05E-03 |
| cg14671453 | 16 | 31044716 | TSS200                    | <i>STX4</i>       | -4.985±0.532 | -5.34±0.613  | 4.96E-03 |
| cg26350691 | 16 | 31084486 | GeneBody/5'UTR/1st exon   | <i>ZNF668</i>     | -3.454±0.472 | -3.787±0.64  | 4.56E-03 |
| cg08395706 | 16 | 31084501 | GeneBody/5'UTR/1st exon   | <i>ZNF668</i>     | -4.783±0.349 | -5.13±0.624  | 3.76E-04 |
| cg18160978 | 16 | 31085251 | GeneBody/5'UTR/1st exon   | <i>ZNF668</i>     | -4.088±0.36  | -4.379±0.616 | 2.98E-03 |
| cg09765256 | 16 | 31085507 | GeneBody/5'UTR/1st exon   | <i>ZNF668</i>     | -4.939±0.416 | -5.358±0.435 | 3.07E-05 |
| cg25047102 | 16 | 31106318 | TSS200                    | <i>VKORC1</i>     | -5.663±0.385 | -5.906±0.418 | 6.91E-03 |
| cg15785580 | 16 | 31119650 | GeneBody/5'UTR/1st exon   | <i>BCKDK</i>      | -5.24±0.529  | -5.652±0.478 | 6.77E-04 |
| cg18278261 | 16 | 31191521 | GeneBody/5'UTR/1st exon   | <i>FUS</i>        | -6.02±0.619  | -6.45±0.687  | 3.18E-03 |
| cg14131445 | 16 | 31519964 | TSS1500                   | <i>C16orf58</i>   | -3.797±0.216 | -3.972±0.365 | 2.82E-03 |
| cg19229809 | 16 | 31885194 | GeneBody/1st exon         | <i>ZNF267</i>     | -4.858±0.371 | -5.096±0.302 | 3.90E-03 |
| cg03693601 | 16 | 46655349 | TSS200                    | <i>SHCBP1</i>     | -5.325±0.406 | -5.581±0.514 | 9.53E-03 |
| cg13448401 | 16 | 46723048 | GeneBody/5'UTR/1st exon   | <i>VPS35</i>      | -6.142±0.517 | -6.67±0.664  | 4.85E-05 |
| cg24306924 | 16 | 46918433 | GeneBody/5'UTR/1st intron | <i>GPT2</i>       | -5.055±0.5   | -5.516±0.667 | 2.39E-04 |
| cg21369679 | 16 | 47007757 | TSS200                    | <i>DNAJA2</i>     | -4.63±0.369  | -5.106±0.464 | 7.66E-07 |
| cg14074641 | 16 | 48181753 | TSS1500                   | <i>ABCC12</i>     | 0.241±0.493  | -0.251±0.66  | 8.02E-05 |
| cg13897627 | 16 | 49378497 | 0                         | 0                 | 0.909±0.707  | 0.326±0.764  | 5.03E-04 |
| cg24217877 | 16 | 49378579 | 0                         | 0                 | 0.801±0.437  | 0.381±0.696  | 3.00E-04 |
| cg07804582 | 16 | 49407186 | TSS1500                   | <i>C16orf78</i>   | 1.933±0.653  | 1.471±1.029  | 7.13E-03 |
| cg24642468 | 16 | 49407997 | GeneBody/1st exon         | <i>C16orf78</i>   | 0.212±0.556  | -0.225±0.723 | 1.45E-03 |
| cg02238504 | 16 | 49861375 | GeneBody/5'UTR/1st intron | <i>ZNF423</i>     | 2.337±0.615  | 1.896±1.009  | 7.28E-03 |
| cg21644628 | 16 | 50099438 | TSS1500                   | <i>HEATR3</i>     | 1.833±0.418  | 1.436±0.534  | 1.34E-04 |
| cg13851211 | 16 | 50321678 | TSS200                    | <i>ADCY7</i>      | 3.503±0.191  | 3.767±0.331  | 1.41E-06 |
| cg25307081 | 16 | 50402689 | GeneBody/5'UTR/1st exon   | <i>BRD7</i>       | -0.85±0.303  | -1.065±0.271 | 1.75E-03 |
| cg02021817 | 16 | 53468150 | TSS200                    | <i>RBL2</i>       | -3.316±0.506 | -3.657±0.641 | 5.66E-03 |
| cg13426503 | 16 | 53468712 | GeneBody/1st intron       | <i>RBL2</i>       | -4.953±0.423 | -5.293±0.482 | 7.82E-04 |
| cg10965432 | 16 | 53537025 | GeneBody/5'UTR/1st intron | <i>AKTIP</i>      | -5.751±0.518 | -6.174±0.535 | 5.04E-04 |
| cg03713346 | 16 | 57126807 | GeneBody/5'UTR/1st intron | <i>CPNE2</i>      | -5.323±0.554 | -5.654±0.465 | 7.13E-03 |
| cg06688848 | 16 | 57220097 | TSS200                    | <i>FAM192A</i>    | -4.946±0.33  | -5.155±0.409 | 9.14E-03 |
| cg22136326 | 16 | 57278759 | TSS1500                   | <i>ARL2BP</i>     | -5.485±0.668 | -5.961±0.634 | 1.89E-03 |
| cg20142224 | 16 | 57520176 | GeneBody/5'UTR/1st intron | <i>DOK4</i>       | -4.792±0.32  | -5.112±0.534 | 2.38E-04 |
| cg26352374 | 16 | 57570280 | GeneBody/5'UTR/1st intron | <i>CCDC102A</i>   | -6.015±0.535 | -6.487±0.676 | 3.47E-04 |
| cg03278960 | 16 | 58035186 | TSS200                    | <i>USB1</i>       | -5.373±0.399 | -5.724±0.53  | 4.16E-04 |
| cg16652241 | 16 | 58059321 | GeneBody/5'UTR/1st exon   | <i>MMP15</i>      | -3.742±0.348 | -3.986±0.396 | 3.08E-03 |

|            |    |          |                           |              |              |              |          |
|------------|----|----------|---------------------------|--------------|--------------|--------------|----------|
| cg15508020 | 16 | 58232206 | TSS1500                   | CSNK2A2      | -4.414±0.365 | -4.713±0.397 | 5.60E-04 |
| cg21335942 | 16 | 58549945 | GeneBody                  | SETD6        | -5.47±0.62   | -6.039±1.133 | 1.10E-03 |
| cg04270274 | 16 | 58662988 | GeneBody/5'UTR/1st intron | CNOT1        | -3.833±0.23  | -3.973±0.254 | 9.54E-03 |
| cg23761196 | 16 | 58664510 | TSS1500                   | CNOT1        | -3.189±0.413 | -2.825±0.42  | 2.01E-04 |
| cg09222791 | 16 | 66835320 | GeneBody/5'UTR/1st intron | CCDC79       | 5.301±0.33   | 5.53±0.412   | 4.37E-03 |
| cg02801598 | 16 | 66914223 | TSS200                    | PDP2         | -4.336±0.388 | -4.725±0.737 | 4.86E-04 |
| cg21112925 | 16 | 66968030 | GeneBody/1st intron       | FAM96B       | -4.479±0.429 | -4.801±0.593 | 2.80E-03 |
| cg01457653 | 16 | 67193218 | GeneBody/5'UTR/1st intron | TRADD        | -4.484±0.61  | -4.898±0.475 | 2.27E-03 |
| cg05501658 | 16 | 67226184 | GeneBody/1st exon         | E2F4         | -4.679±0.351 | -4.904±0.456 | 9.04E-03 |
| cg14440934 | 16 | 67450691 | TSS1500                   | ZDHHC1       | -2.481±0.519 | -2.925±0.532 | 3.43E-04 |
| cg15301525 | 16 | 67515344 | TSS1500                   | ATP6V0D1     | -5.709±0.303 | -6.025±0.372 | 2.86E-05 |
| cg01866162 | 16 | 67596514 | GeneBody/5'UTR/1st exon   | CTCF         | -5.662±0.449 | -6.056±0.762 | 1.23E-03 |
| cg17582250 | 16 | 67906816 | TSS200                    | EDC4         | -4.623±0.748 | -5.16±0.773  | 2.01E-03 |
| cg21196187 | 16 | 67926862 | TSS1500                   | PSKH1        | -4.883±0.438 | -5.168±0.466 | 5.13E-03 |
| cg13846555 | 16 | 67970749 | GeneBody/5'UTR/1st exon   | PSMB10       | -4.53±0.321  | -4.80.386    | 5.25E-04 |
| cg06071083 | 16 | 68002365 | GeneBody/1st exon         | SLC12A4      | -5.65±0.537  | -6.122±0.694 | 3.97E-04 |
| cg06140118 | 16 | 68056778 | TSS200                    | DUS2L        | -4.407±0.652 | -4.811±0.67  | 7.22E-03 |
| cg24654547 | 16 | 68057165 | GeneBody/5'UTR/1st exon   | DUS2L        | -3.643±0.79  | -4.138±0.8   | 6.53E-03 |
| cg21348691 | 16 | 68057212 | GeneBody/5'UTR/1st exon   | DUS2L        | -4.726±0.419 | -5.14±0.583  | 1.12E-04 |
| cg17125623 | 16 | 68119985 | GeneBody/1st intron       | NFATC3       | -3.029±0.512 | -3.392±0.757 | 6.35E-03 |
| cg22328890 | 16 | 68298258 | TSS200                    | SLC7A6       | -4.943±0.367 | -5.262±0.482 | 4.80E-04 |
| cg21918026 | 16 | 68344902 | GeneBody/5'UTR/1st exon   | PRMT7        | -3.26±0.225  | -3.419±0.196 | 1.78E-03 |
| cg11893236 | 16 | 68345102 | GeneBody/5'UTR/1st intron | PRMT7        | -4.494±0.296 | -4.77±0.449  | 3.60E-04 |
| cg04779191 | 16 | 69166964 | GeneBody/5'UTR/1st intron | CIRH1A       | -4.518±0.419 | -4.871±0.551 | 6.92E-04 |
| cg08461397 | 16 | 69220726 | TSS1500                   | SNB2         | -3.971±0.36  | -4.31±0.657  | 8.11E-04 |
| cg00424946 | 16 | 69221172 | GeneBody/1st exon         | SNB2         | -5.129±0.513 | -5.471±0.591 | 4.92E-03 |
| cg25300941 | 16 | 69344885 | TSS1500                   | VPS4A        | -4.495±0.444 | -4.838±0.524 | 1.30E-03 |
| cg04391736 | 16 | 69373674 | TSS200                    | COG8         | -5.325±0.371 | -5.767±0.576 | 9.57E-06 |
| cg09669099 | 16 | 69419557 | GeneBody/1st exon         | TERF2        | -3.169±0.409 | -2.781±0.475 | 9.98E-05 |
| cg03970351 | 16 | 69420083 | TSS200                    | TERF2        | -5.854±0.511 | -6.237±0.574 | 1.58E-03 |
| cg05439318 | 16 | 69458329 | TSS200                    | CYB5B        | -4.834±0.391 | -5.31±0.542  | 3.65E-06 |
| cg11564268 | 16 | 69789107 | TSS1500                   | NOB1         | -5.087±0.438 | -5.456±0.635 | 9.61E-04 |
| cg19110355 | 16 | 69796693 | GeneBody/5'UTR/1st intron | WWP2         | -4.114±0.262 | -4.271±0.253 | 8.57E-03 |
| cg10468369 | 16 | 70333434 | GeneBody/1st intron       | DDX19B       | -5.32±0.38   | -5.566±0.407 | 5.57E-03 |
| cg11093356 | 16 | 70380593 | GeneBody/1st exon         | LOC100506083 | -4.868±0.37  | -5.156±0.546 | 2.48E-03 |
| cg09881917 | 16 | 70487956 | TSS1500                   | FUK          | -4.01±0.713  | -4.478±0.677 | 3.96E-03 |
| cg05547993 | 16 | 70835035 | GeneBody/5'UTR/1st exon   | VAC14        | -4.876±0.461 | -5.266±0.541 | 4.58E-04 |
| cg27304754 | 16 | 71392088 | TSS1500                   | CALB2        | -1.954±0.462 | -2.31±0.643  | 2.20E-03 |
| cg15824968 | 16 | 71842778 | GeneBody/5'UTR/1st exon   | AP1G1        | -4.516±0.347 | -4.869±0.356 | 2.53E-05 |
| cg21228284 | 16 | 72127518 | GeneBody/5'UTR/1st exon   | TXNL4B       | -4.518±0.382 | -4.958±0.62  | 2.36E-05 |
| cg01994779 | 16 | 75033384 | GeneBody/5'UTR/1st exon   | ZNRF1        | -4.603±0.569 | -5.043±0.7   | 1.46E-03 |
| cg03217964 | 16 | 75182191 | TSS1500                   | ZFP1         | -4.517±0.35  | -4.849±0.462 | 1.56E-04 |
| cg27005053 | 16 | 75467374 | GeneBody/5'UTR/1st exon   | CFDP1        | -5.521±0.495 | -5.825±0.541 | 8.77E-03 |
| cg13906548 | 16 | 75600564 | GeneBody/1st intron       | GABARAPL2    | -5.048±0.448 | -5.407±0.49  | 7.25E-04 |
| cg08585897 | 16 | 75680535 | GeneBody/1st intron       | KARS         | -0.324±0.602 | -0.789±0.69  | 1.23E-03 |
| cg25383242 | 16 | 76343663 | TSS200                    | CNTNAP4      | 1.804±0.52   | 1.385±0.677  | 1.12E-03 |
| cg18383391 | 16 | 77224198 | TSS1500                   | MON1B        | -4.879±0.516 | -5.267±0.633 | 1.91E-03 |
| cg16508857 | 16 | 78133117 | TSS1500                   | WWOX         | -3.974±0.316 | -4.183±0.352 | 5.13E-03 |
| cg10689889 | 16 | 79634732 | TSS200                    | MAF          | -5.906±0.733 | -6.432±0.61  | 1.42E-03 |
| cg20567721 | 16 | 81040639 | TSS200                    | CMC2         | -2.988±0.14  | -3.228±0.252 | 1.72E-08 |
| cg15264808 | 16 | 81041398 | TSS1500                   | CMC2         | -4.426±0.729 | -5.14±0.769  | 4.76E-05 |
| cg22947000 | 16 | 81272281 | TSS200                    | BCMO1        | -2.368±0.437 | -2.667±0.617 | 7.37E-03 |
| cg05916783 | 16 | 81348309 | TSS1500                   | GAN          | -4.815±0.284 | -5.033±0.282 | 9.30E-04 |
| cg03930357 | 16 | 84150069 | GeneBody/5'UTR/1st intron | MBTPS1       | -3.925±0.281 | -4.199±0.506 | 5.11E-04 |
| cg20315643 | 16 | 84220562 | GeneBody/5'UTR/1st exon   | TAF1C        | -3.986±0.25  | -4.252±0.282 | 1.57E-05 |
| cg12533335 | 16 | 84220778 | TSS200                    | TAF1C        | -4.11±0.418  | -4.368±0.413 | 7.00E-03 |
| cg22677246 | 16 | 84651094 | GeneBody                  | COTL1        | -5.766±0.49  | -6.29±0.762  | 5.83E-05 |
| cg07179770 | 16 | 84681994 | TSS200                    | KLHL36       | -4.867±0.522 | -5.405±0.711 | 5.28E-05 |
| cg01876612 | 16 | 85045424 | TSS1500                   | ZDHHC7       | -5.013±0.542 | -5.373±0.601 | 4.78E-03 |
| cg16034046 | 16 | 85646474 | TSS1500                   | GSE1         | -5.644±0.481 | -6.081±0.497 | 1.32E-04 |
| cg23530850 | 16 | 85647010 | GeneBody/1st intron       | GSE1         | -5.053±0.452 | -5.35±0.528  | 5.97E-03 |
| cg09831311 | 16 | 85833828 | GeneBody/5'UTR/1st intron | COX4I1       | -4.682±0.324 | -4.916±0.325 | 1.86E-03 |
| cg03631076 | 16 | 87985047 | GeneBody/5'UTR/1st exon   | BANP         | -4.707±0.348 | -4.989±0.475 | 1.25E-03 |
| cg21910663 | 16 | 88730440 | GeneBody/1st intron       | SNAI3-AS1    | -3.86±0.509  | -4.178±0.497 | 6.37E-03 |
| cg06178072 | 16 | 88922252 | GeneBody/1st intron       | GALNS        | 2.721±0.284  | 2.998±0.369  | 9.82E-05 |
| cg08781448 | 16 | 88923231 | GeneBody/1st exon         | GALNS        | -6.124±0.453 | -6.429±0.553 | 5.37E-03 |
| cg00151607 | 16 | 88923507 | GeneBody/5'UTR/1st exon   | TRAPPC2L     | -4.738±0.271 | -5.072±0.585 | 6.96E-05 |
| cg03819692 | 16 | 89225639 | GeneBody/1st exon         | LINC00304    | 0.934±0.704  | 0.454±0.943  | 6.01E-03 |
| cg04879696 | 16 | 89574810 | GeneBody/5'UTR/1st exon   | SPG7         | -4.566±0.41  | -4.846±0.387 | 2.79E-03 |
| cg23877786 | 16 | 89626662 | TSS1500                   | RPL13        | -3.624±0.212 | -3.874±0.3   | 7.46E-06 |
| cg27462160 | 16 | 89768630 | TSS1500                   | SPATA2L      | -3.686±0.32  | -3.882±0.298 | 6.91E-03 |
| cg02609749 | 16 | 89786786 | TSS1500                   | ZNF276       | -3.243±0.335 | -3.563±0.398 | 9.27E-05 |
| cg19216839 | 16 | 89882934 | GeneBody/1st intron       | FANCA        | -5.33±0.395  | -5.701±0.566 | 2.50E-04 |
| cg01161216 | 16 | 89939448 | TSS1500                   | TCF25        | -4.497±0.255 | -4.657±0.274 | 7.20E-03 |
| cg16799087 | 16 | 90128361 | GeneBody/1st exon         | PRDM7        | 1.582±0.509  | 1.21±0.873   | 7.46E-03 |
| cg04326040 | 17 | 617519   | GeneBody/1st intron       | VPS53        | -3.855±0.478 | -4.216±0.587 | 1.83E-03 |
| cg10318443 | 17 | 685449   | TSS200                    | RNMTL1       | -5.425±0.452 | -5.773±0.598 | 1.83E-03 |
| cg18085206 | 17 | 1359243  | GeneBody/1st exon         | CRK          | -5.931±0.575 | -6.569±0.707 | 1.10E-05 |
| cg06197006 | 17 | 1359813  | TSS1500                   | CRK          | -4.836±0.302 | -5.183±0.458 | 1.64E-05 |
| cg20612559 | 17 | 1419634  | GeneBody/5'UTR/1st intron | INPP5K       | -5.166±0.523 | -5.595±0.621 | 6.78E-04 |
| cg11023442 | 17 | 1420488  | GeneBody/1st intron       | PITPNA-AS1   | -4.916±0.406 | -5.391±0.549 | 6.76E-06 |
| cg00761755 | 17 | 1531579  | GeneBody/5'UTR/1st intron | SLC43A2      | -5.28±0.467  | -5.59±0.559  | 5.61E-03 |
| cg11896345 | 17 | 1532217  | TSS200                    | SLC43A2      | -4.88±0.385  | -5.156±0.494 | 3.49E-03 |
| cg19400725 | 17 | 1552970  | GeneBody/1st exon         | RILP         | -4.463±0.296 | -4.672±0.294 | 2.20E-03 |
| cg04317366 | 17 | 1588445  | TSS1500                   | PRPF8        | -3.782±0.433 | -4.105±0.54  | 2.14E-03 |
| cg17057072 | 17 | 1733021  | GeneBody/5'UTR/1st exon   | SMYD4        | -3.581±0.352 | -3.903±0.378 | 1.33E-04 |
| cg23906144 | 17 | 1945509  | GeneBody/1st exon         | OVCA2        | -5.14±0.638  | -5.544±0.691 | 6.66E-03 |
| cg18557086 | 17 | 2304670  | TSS1500                   | MNT          | -3.698±0.501 | -4.062±0.698 | 3.88E-03 |
| cg26932976 | 17 | 2615186  | TSS1500                   | CLUH         | -5.185±0.411 | -5.488±0.507 | 2.38E-03 |
| cg27622610 | 17 | 3030185  | GeneBody/1st exon         | OR1G1        | 0.219±0.676  | -0.215±0.852 | 8.32E-03 |
| cg16678925 | 17 | 3100972  | GeneBody/1st exon         | OR1A2        | -0.073±0.599 | -0.454±0.667 | 6.86E-03 |
| cg14014613 | 17 | 3196049  | TSS200                    | OR3A1        | 2.106±0.661  | 1.677±0.766  | 6.30E-03 |
| cg05674036 | 17 | 3323791  | TSS200                    | OR3A3        | 1.496±0.63   | 1.036±0.899  | 3.91E-03 |
| cg22510822 | 17 | 3337427  | TSS1500                   | OR1E2        | 1.652±0.675  | 1.204±0.949  | 8.40E-03 |
| cg12485992 | 17 | 3374971  | GeneBody/5'UTR/1st exon   | SPATA22      | 3.248±0.368  | 2.904±0.654  | 7.59E-04 |

|            |    |          |                           |           |              |              |          |
|------------|----|----------|---------------------------|-----------|--------------|--------------|----------|
| cg07732644 | 17 | 3378397  | TSS1500                   | ASPA      | 1.071±0.378  | 0.744±0.533  | 6.57E-04 |
| cg01040062 | 17 | 4046467  | GeneBody/5'UTR/1st exon   | CYB5D2    | -4.321±0.287 | -4.619±0.386 | 4.67E-05 |
| cg05922057 | 17 | 4047571  | GeneBody/5'UTR/1st intron | CYB5D2    | -3.967±0.428 | -4.264±0.527 | 4.11E-03 |
| cg19921492 | 17 | 4699234  | TSS1500                   | PSMB6     | -2.247±0.367 | -2.506±0.609 | 8.70E-03 |
| cg24221059 | 17 | 4699732  | GeneBody/1st intron       | PSMB6     | -4.296±0.474 | -4.602±0.492 | 5.33E-03 |
| cg16685860 | 17 | 4710619  | GeneBody/5'UTR/1st intron | PLD2      | -5.115±0.879 | -5.66±0.652  | 4.81E-03 |
| cg06554928 | 17 | 4852795  | TSS1500                   | PFN1      | -3.935±0.191 | -4.05±0.203  | 9.93E-03 |
| cg17820591 | 17 | 4853706  | TSS1500                   | ENO3      | -4.226±0.308 | -4.472±0.401 | 1.23E-03 |
| cg13818368 | 17 | 4871354  | TSS1500                   | SPAG7     | -4.253±0.246 | -4.483±0.386 | 4.15E-04 |
| cg07811750 | 17 | 4890503  | GeneBody/5'UTR/1st exon   | CAMTA2    | -5.711±0.548 | -6.118±0.679 | 2.20E-03 |
| cg11264817 | 17 | 4901584  | GeneBody/5'UTR/1st intron | KIF1C     | -5.897±0.454 | -6.203±0.621 | 6.94E-03 |
| cg12954718 | 17 | 5031366  | TSS1500                   | USP6      | -0.196±0.342 | -0.445±0.479 | 3.91E-03 |
| cg08742106 | 17 | 5031982  | GeneBody/5'UTR/1st exon   | USP6      | 2.188±0.549  | 1.803±0.675  | 3.72E-03 |
| cg17505757 | 17 | 5323140  | TSS200                    | NUP88     | -3.519±0.472 | -3.839±0.537 | 4.18E-03 |
| cg26382071 | 17 | 6544903  | TSS1500                   | KIAA0753  | -4.578±0.419 | -4.957±0.438 | 1.48E-04 |
| cg07265622 | 17 | 6554855  | GeneBody/5'UTR/1st exon   | MED31     | -3.497±0.232 | -3.698±0.372 | 1.16E-03 |
| cg02740128 | 17 | 7123860  | TSS1500                   | DLG4      | -3.268±0.227 | -3.457±0.299 | 8.06E-04 |
| cg14438174 | 17 | 7137923  | TSS200                    | DVL2      | -4.19±0.512  | -4.541±0.616 | 4.31E-03 |
| cg1287330  | 17 | 7154245  | GeneBody/1st intron       | CTDNBP1   | -4.36±0.432  | -4.717±0.398 | 3.52E-04 |
| cg11566939 | 17 | 7155231  | GeneBody/5'UTR/1st exon   | CTDNBP1   | -3.353±0.207 | -3.519±0.301 | 1.72E-03 |
| cg15215114 | 17 | 7307419  | GeneBody/5'UTR/1st exon   | TMEM256   | -5.108±0.494 | -5.449±0.714 | 6.80E-03 |
| cg23196133 | 17 | 7388063  | GeneBody/5'UTR/1st exon   | POLR2A    | -5.397±0.513 | -5.731±0.562 | 5.60E-03 |
| cg10353436 | 17 | 7476140  | GeneBody/5'UTR/1st exon   | EIF4A1    | -4.656±0.31  | -4.96±0.34   | 5.35E-05 |
| cg00103783 | 17 | 7487249  | GeneBody/1st exon         | MPDU1     | -5.281±0.384 | -5.663±0.461 | 5.53E-05 |
| cg01191395 | 17 | 7530998  | GeneBody/5'UTR/1st exon   | SAT2      | -4.707±0.336 | -5.04±0.438  | 8.09E-05 |
| cg01249910 | 17 | 7531244  | TSS200                    | SHBG      | -3.789±0.272 | -4.012±0.343 | 8.31E-04 |
| cg15206330 | 17 | 7591591  | TSS200                    | WRAP53    | -5.721±0.528 | -6.072±0.583 | 4.73E-03 |
| cg12343777 | 17 | 7942342  | TSS200                    | ALOX15B   | -2.486±0.725 | -2.931±0.619 | 6.05E-03 |
| cg10392768 | 17 | 8021828  | GeneBody/5'UTR/1st exon   | ALOXE3    | -4.375±0.355 | -4.715±0.455 | 1.18E-04 |
| cg02571905 | 17 | 8079626  | GeneBody/5'UTR/1st exon   | TMEM107   | -5.289±0.383 | -5.556±0.418 | 3.06E-03 |
| cg06319579 | 17 | 8127196  | GeneBody/1st exon         | LINC00324 | -2.115±0.424 | -2.408±0.578 | 5.51E-03 |
| cg11178443 | 17 | 8192024  | GeneBody/5'UTR/1st exon   | RANGRF    | -5.265±0.413 | -5.565±0.426 | 1.81E-03 |
| cg09008187 | 17 | 8198627  | TSS1500                   | SLC25A35  | -5.404±0.51  | -5.897±0.532 | 5.55E-05 |
| cg05334253 | 17 | 8338877  | TSS1500                   | NDEL1     | -4.494±0.398 | -4.919±0.466 | 1.69E-05 |
| cg06011292 | 17 | 8534013  | GeneBody/5'UTR/1st exon   | MYH10     | -4.925±0.83  | -5.582±0.727 | 5.22E-04 |
| cg01044722 | 17 | 8534126  | TSS200                    | MYH10     | -4.322±0.399 | -4.689±0.556 | 2.99E-04 |
| cg19564877 | 17 | 8925201  | GeneBody/5'UTR/1st intron | NTN1      | -4.241±0.85  | -4.764±0.678 | 5.48E-03 |
| cg00134787 | 17 | 10419499 | GeneBody                  | MYH1      | 0.936±0.637  | 0.507±0.844  | 6.52E-03 |
| cg06220958 | 17 | 10452851 | GeneBody/5'UTR/1st intron | MYH2      | -2.37±0.453  | -2.713±0.592 | 2.18E-03 |
| cg18432105 | 17 | 10453510 | TSS1500                   | MYH2      | 1.605±0.385  | 1.221±0.675  | 3.68E-04 |
| cg00408209 | 17 | 10600689 | GeneBody/1st exon         | SCO1      | -4.971±0.52  | -5.273±0.329 | 7.06E-03 |
| cg03592161 | 17 | 10601178 | GeneBody/5'UTR/1st intron | ADPRM     | -5.867±0.527 | -6.425±0.594 | 1.74E-05 |
| cg26162695 | 17 | 12921313 | GeneBody/5'UTR/1st exon   | ELAC2     | -5.693±0.585 | -6.222±0.698 | 2.06E-04 |
| cg22774127 | 17 | 13972928 | TSS200                    | COX10-AS1 | -5.081±0.379 | -5.395±0.459 | 6.53E-04 |
| cg03073814 | 17 | 15902501 | TSS200                    | TTC19     | -4.22±0.408  | -4.49±0.592  | 9.28E-03 |
| cg06537829 | 17 | 16283976 | TSS1500                   | UBB       | -4.383±0.513 | -4.749±0.581 | 2.69E-03 |
| cg08270477 | 17 | 16342776 | TSS200                    | SNORD49B  | -5.512±0.456 | -5.889±0.657 | 1.22E-03 |
| cg10583632 | 17 | 16557199 | TSS200                    | ZNF624    | -5.459±0.49  | -5.85±0.57   | 8.64E-04 |
| cg24170090 | 17 | 16945301 | TSS1500                   | MPRIP     | -3.831±0.309 | -4.106±0.438 | 4.80E-04 |
| cg25448636 | 17 | 17140084 | GeneBody/5'UTR/1st intron | FLCN      | -4.605±0.285 | -5.001±0.422 | 3.81E-07 |
| cg02975142 | 17 | 17140597 | TSS200                    | FLCN      | -4.482±0.335 | -4.707±0.372 | 4.26E-03 |
| cg22309826 | 17 | 17184440 | GeneBody/1st intron       | COPB3     | -5.363±0.392 | -5.676±0.403 | 6.50E-04 |
| cg23159296 | 17 | 17740009 | GeneBody/1st intron       | SREBF1    | -5.846±0.449 | -6.133±0.539 | 7.65E-03 |
| cg20131685 | 17 | 18128578 | TSS1500                   | LLGL1     | -4.336±0.475 | -4.684±0.539 | 2.03E-03 |
| cg25558099 | 17 | 18219121 | GeneBody/1st exon         | SMCR8     | -3.742±0.663 | -4.158±0.786 | 8.74E-03 |
| cg16094520 | 17 | 18267123 | TSS1500                   | SHMT1     | -3.656±0.238 | -3.922±0.334 | 1.66E-05 |
| cg15831452 | 17 | 18761345 | TSS200                    | PRPSAP2   | -5.554±0.411 | -5.829±0.53  | 6.41E-03 |
| cg12353516 | 17 | 19281309 | GeneBody/5'UTR/1st exon   | B9D1      | -4.246±0.343 | -4.58±0.39   | 6.27E-05 |
| cg22767735 | 17 | 19551663 | TSS1500                   | ALDH3A2   | -4.817±0.342 | -5.074±0.408 | 1.74E-03 |
| cg09303043 | 17 | 19552393 | GeneBody/1st exon         | ALDH3A2   | -5.808±0.487 | -6.204±0.634 | 1.00E-03 |
| cg02811755 | 17 | 19880691 | GeneBody/1st intron       | AKAP10    | -5.28±0.373  | -5.527±0.348 | 3.62E-03 |
| cg26357453 | 17 | 21030054 | TSS200                    | DHRS7B    | -4.043±0.768 | -4.521±0.785 | 7.05E-03 |
| cg19383689 | 17 | 25621092 | TSS200                    | WSB1      | -4.725±0.538 | -5.142±0.577 | 1.00E-03 |
| cg08706258 | 17 | 25621230 | GeneBody/5'UTR/1st exon   | WSB1      | -5.663±0.351 | -5.952±0.57  | 2.03E-03 |
| cg19539519 | 17 | 26553687 | GeneBody/1st exon         | PYY2      | 3.308±0.286  | 3.498±0.373  | 6.81E-03 |
| cg21784498 | 17 | 26645922 | TSS200                    | TMEM97    | -5.864±0.58  | -6.362±0.558 | 2.32E-04 |
| cg01438829 | 17 | 26646651 | GeneBody/1st intron       | TMEM97    | -4.633±0.322 | -4.86±0.34   | 2.52E-03 |
| cg18712119 | 17 | 26662236 | GeneBody/5'UTR/1st intron | IFT20     | -4.94±0.447  | -5.262±0.417 | 1.63E-03 |
| cg00464269 | 17 | 26662842 | GeneBody/5'UTR/1st exon   | TNFAIP1   | -5.082±0.472 | -5.383±0.557 | 7.60E-03 |
| cg14445437 | 17 | 26898124 | GeneBody                  | PIGS      | -5.056±0.388 | -5.405±0.455 | 2.11E-04 |
| cg00449941 | 17 | 26926011 | GeneBody/5'UTR/1st exon   | SPAG5     | -4.459±0.361 | -4.768±0.538 | 9.17E-04 |
| cg09076584 | 17 | 26941253 | TSS200                    | SGK494    | 1.964±0.447  | 2.277±0.533  | 3.49E-03 |
| cg26787505 | 17 | 27053695 | GeneBody/1st intron       | TLCD1     | -5.614±0.602 | -6.147±0.71  | 2.64E-04 |
| cg21069922 | 17 | 27182342 | GeneBody/1st intron       | ERAL1     | -4.464±0.618 | -4.892±0.594 | 2.53E-03 |
| cg17568035 | 17 | 27224811 | TSS200                    | FLOT2     | -4.947±0.384 | -5.344±0.654 | 1.67E-04 |
| cg10671802 | 17 | 27230278 | TSS200                    | DHRS13    | -4.679±0.289 | -5.022±0.462 | 1.28E-05 |
| cg13564075 | 17 | 27278810 | TSS1500                   | PHF12     | -5.481±0.427 | -5.9±0.552   | 8.84E-05 |
| cg00426498 | 17 | 27507667 | TSS1500                   | MYO18A    | -1.782±0.227 | -1.988±0.3   | 2.90E-04 |
| cg01491540 | 17 | 28256424 | TSS1500                   | EFCAB5    | -4.761±0.288 | -5.112±0.414 | 4.53E-06 |
| cg18700967 | 17 | 28257024 | TSS200                    | SSH2      | -4.753±0.591 | -5.488±0.707 | 1.37E-06 |
| cg05141870 | 17 | 28444127 | GeneBody/1st exon         | MIR423    | -4.725±0.501 | -5.072±0.493 | 2.67E-03 |
| cg13759778 | 17 | 29624439 | TSS200                    | OMG       | 2.198±0.353  | 2.416±0.29   | 5.57E-03 |
| cg16910379 | 17 | 30186525 | TSS200                    | COPRS     | -4.3±0.546   | -4.858±0.692 | 4.57E-05 |
| cg12000587 | 17 | 30186630 | TSS1500                   | COPRS     | -1.918±0.499 | -2.348±0.654 | 5.24E-04 |
| cg18042079 | 17 | 30229074 | TSS1500                   | UTP6      | -3.965±0.31  | -4.214±0.476 | 2.02E-03 |
| cg27288777 | 17 | 30264551 | GeneBody/1st intron       | SUZ12     | -4.295±0.288 | -4.591±0.421 | 7.89E-05 |
| cg16007628 | 17 | 30677100 | TSS200                    | MIR632    | -3.416±0.365 | -3.737±0.684 | 2.00E-03 |
| cg13843603 | 17 | 30771994 | GeneBody/1st intron       | PSMD11    | -4.546±0.195 | -4.839±0.398 | 1.18E-06 |
| cg11221508 | 17 | 33288337 | GeneBody/1st exon         | CTT6B     | -5.432±0.578 | -5.805±0.575 | 5.01E-03 |
| cg21116410 | 17 | 33905650 | GeneBody/5'UTR/1st exon   | PEX12     | -5.439±0.54  | -5.832±0.532 | 1.63E-03 |
| cg07628086 | 17 | 33914258 | TSS200                    | AP2B1     | -5.415±0.279 | -5.773±0.633 | 5.65E-05 |
| cg23996241 | 17 | 33914362 | GeneBody/5'UTR/1st exon   | AP2B1     | -4.216±0.239 | -4.427±0.326 | 4.42E-04 |
| cg00021527 | 17 | 34136180 | TSS1500                   | TAF15     | -4.577±0.608 | -5.08±0.6    | 3.90E-04 |
| cg15824080 | 17 | 34137105 | GeneBody/1st intron       | TAF15     | -3.773±0.371 | -4.051±0.521 | 2.96E-03 |
| cg15532088 | 17 | 34195134 | GeneBody/1st intron       | C17orf66  | 1.935±0.371  | 2.17±0.476   | 9.51E-03 |

|            |    |          |                           |          |              |              |          |
|------------|----|----------|---------------------------|----------|--------------|--------------|----------|
| cg16826286 | 17 | 34266290 | GeneBody/1st exon         | LYZL6    | 0.712±0.396  | 0.43±0.551   | 4.71E-03 |
| cg15129294 | 17 | 34639274 | TSS1500                   | CCL4L2   | -0.488±0.634 | -0.947±0.747 | 2.52E-03 |
| cg24473385 | 17 | 34842439 | TSS200                    | ZNHIT3   | -5.822±0.495 | -6.213±0.552 | 8.71E-04 |
| cg16544272 | 17 | 34891014 | GeneBody/5'UTR            | MYO19    | -4.939±0.568 | -5.396±0.588 | 6.13E-04 |
| cg19678067 | 17 | 34901173 | GeneBody/5'UTR/1st intron | GGNBP2   | -3.725±0.259 | -3.91±0.368  | 4.67E-03 |
| cg11976048 | 17 | 34948329 | GeneBody/5'UTR/1st exon   | DHRS11   | -5.542±0.606 | -6.068±0.614 | 2.26E-04 |
| cg11857445 | 17 | 35305905 | TSS1500                   | AATF     | -3.984±0.351 | -4.218±0.393 | 4.73E-03 |
| cg20139214 | 17 | 35767334 | GeneBody/5'UTR/1st exon   | TADA2A   | -4.738±0.306 | -4.927±0.259 | 5.71E-03 |
| cg02987163 | 17 | 35849291 | TSS1500                   | DUSP14   | -3.814±0.339 | -4.115±0.415 | 2.88E-04 |
| cg02102644 | 17 | 35969361 | GeneBody/1st exon         | SYNRG    | -4.943±0.555 | -5.371±0.494 | 7.31E-04 |
| cg07165793 | 17 | 35969650 | TSS200                    | SYNRG    | -4.535±0.43  | -4.832±0.439 | 2.86E-03 |
| cg26863324 | 17 | 36003443 | GeneBody/1st exon         | DDX52    | -4.682±0.412 | -4.995±0.65  | 3.94E-03 |
| cg20228512 | 17 | 36904069 | GeneBody/5'UTR            | PCGF2    | -6.157±0.472 | -6.579±0.616 | 3.22E-04 |
| cg00089071 | 17 | 36905809 | TSS1500                   | PCGF2    | -5.648±0.593 | -6.054±0.722 | 4.50E-03 |
| cg13824734 | 17 | 36909238 | GeneBody/1st intron       | PSMB3    | -4.901±0.344 | -5.099±0.265 | 8.90E-03 |
| cg18123596 | 17 | 36956264 | TSS200                    | PIP4K2B  | -4.562±0.256 | -4.746±0.396 | 5.95E-03 |
| cg12247247 | 17 | 37009861 | GeneBody/1st intron       | RPL23    | -3.598±0.612 | -3.967±0.618 | 8.74E-03 |
| cg02060988 | 17 | 37025978 | TSS200                    | LASP1    | -5.305±0.417 | -5.727±0.56  | 6.56E-05 |
| cg12446464 | 17 | 37026641 | GeneBody/5'UTR/1st intron | LASP1    | -4.116±0.408 | -4.439±0.453 | 8.38E-04 |
| cg23894539 | 17 | 37793518 | GeneBody/5'UTR/1st intron | STARD3   | -5.357±0.351 | -5.891±0.717 | 8.62E-07 |
| cg09875273 | 17 | 37843987 | GeneBody/1st intron       | PGAP3    | -3.84±0.444  | -4.208±0.509 | 5.43E-04 |
| cg24649641 | 17 | 37844119 | GeneBody/1st exon         | PGAP3    | -4.627±0.343 | -4.831±0.269 | 7.01E-03 |
| cg19752722 | 17 | 37844579 | GeneBody/5'UTR/1st intron | ERBB2    | -4.546±0.39  | -4.851±0.482 | 1.27E-03 |
| cg19895197 | 17 | 37887061 | TSS1500                   | MIEN1    | -4.481±0.404 | -4.757±0.438 | 3.60E-03 |
| cg13878456 | 17 | 38020344 | GeneBody/1st intron       | IKZF3    | -1.791±0.302 | -2.034±0.249 | 3.97E-04 |
| cg21491028 | 17 | 38136817 | TSS1500                   | PSMD3    | -4.503±0.64  | -4.934±0.593 | 3.08E-03 |
| cg03812679 | 17 | 38170632 | TSS1500                   | CSF3     | -4.027±0.442 | -4.321±0.521 | 5.32E-03 |
| cg09634802 | 17 | 38219592 | GeneBody/5'UTR/1st intron | THRA     | -4.495±0.319 | -4.836±0.531 | 9.21E-05 |
| cg22640452 | 17 | 38256967 | GeneBody/5'UTR/1st exon   | NR1D1    | -5.352±0.514 | -5.762±0.558 | 7.30E-04 |
| cg26061772 | 17 | 38296295 | TSS1500                   | CASC3    | -3.874±0.41  | -4.227±0.613 | 8.82E-04 |
| cg03359285 | 17 | 38573811 | GeneBody/1st intron       | TOP2A    | -4.574±0.442 | -4.899±0.581 | 2.94E-03 |
| cg00512374 | 17 | 38599682 | GeneBody/5'UTR/1st exon   | IGFBP4   | -4.306±0.535 | -4.625±0.466 | 7.71E-03 |
| cg08048656 | 17 | 38804199 | TSS200                    | SMARCE1  | -4.898±0.286 | -5.141±0.296 | 2.99E-04 |
| cg10154926 | 17 | 39891009 | TSS200                    | HAP1     | -4.496±0.595 | -4.961±0.766 | 1.45E-03 |
| cg17388484 | 17 | 39943043 | TSS200                    | JUP      | -4.011±0.388 | -4.369±0.68  | 8.39E-04 |
| cg11053574 | 17 | 39992149 | GeneBody                  | NT5C3B   | -5.067±0.45  | -5.461±0.621 | 5.15E-04 |
| cg05288569 | 17 | 40021733 | TSS200                    | KLHL11   | -5.076±0.377 | -5.337±0.446 | 3.83E-03 |
| cg03958344 | 17 | 40118638 | TSS200                    | CNP      | -5.311±0.429 | -5.887±0.697 | 1.54E-06 |
| cg23866755 | 17 | 40119337 | GeneBody/1st intron       | CNP      | -4.285±0.293 | -4.588±0.37  | 3.55E-05 |
| cg24505527 | 17 | 40168900 | GeneBody/5'UTR/1st intron | DNAJC7   | -5.256±0.539 | -5.598±0.624 | 7.60E-03 |
| cg16762195 | 17 | 40264815 | TSS200                    | DHX58    | -4.458±0.338 | -4.84±0.393  | 3.97E-05 |
| cg05780311 | 17 | 40428759 | TSS1500                   | STAT5B   | -5.576±0.409 | -5.851±0.42  | 3.69E-03 |
| cg18112163 | 17 | 40540197 | GeneBody/5'UTR/1st intron | STAT3    | -5.09±0.524  | -5.577±0.604 | 1.29E-04 |
| cg20082357 | 17 | 40611017 | GeneBody/5'UTR/1st intron | ATP6V0A1 | -5.832±0.458 | -6.155±0.476 | 2.43E-03 |
| cg25664725 | 17 | 40688138 | GeneBody/5'UTR/1st exon   | NAGLU    | -5.371±0.412 | -5.922±0.558 | 5.22E-07 |
| cg20724073 | 17 | 40719654 | GeneBody                  | MLX      | -5.563±0.391 | -5.845±0.414 | 2.03E-03 |
| cg12628062 | 17 | 40729398 | GeneBody/1st intron       | PSMC3IP  | -4.744±0.372 | -5.227±0.529 | 1.30E-06 |
| cg17248183 | 17 | 40761138 | TSS1500                   | TUBG1    | -4.765±0.638 | -5.194±0.588 | 3.09E-03 |
| cg05401645 | 17 | 40761567 | TSS200                    | FAM134C  | -5.979±0.446 | -6.615±0.621 | 1.61E-07 |
| cg14275779 | 17 | 40830236 | TSS1500                   | PLEKHH3  | -4.549±0.372 | -4.979±0.482 | 6.93E-06 |
| cg16225441 | 17 | 40976328 | TSS200                    | BECN1    | -2.453±0.274 | -2.246±0.356 | 2.12E-03 |
| cg26709863 | 17 | 40976775 | TSS1500                   | BECN1    | 2.957±0.169  | 2.786±0.38   | 1.29E-03 |
| cg04429140 | 17 | 41132427 | GeneBody/5'UTR/1st exon   | PTGES3L  | -5.116±0.498 | -5.48±0.524  | 1.76E-03 |
| cg12556991 | 17 | 41150487 | GeneBody/5'UTR/1st exon   | RPL27    | -4.066±0.599 | -4.666±0.804 | 7.50E-05 |
| cg19531713 | 17 | 41277059 | GeneBody/1st intron       | BRCA1    | -2.94±0.172  | -3.127±0.285 | 6.84E-05 |
| cg05011232 | 17 | 41622925 | GeneBody/5'UTR/1st intron | ETV4     | -4.31±0.343  | -4.678±0.407 | 1.64E-05 |
| cg24679082 | 17 | 41623840 | TSS200                    | ETV4     | -4.675±0.495 | -5.138±0.548 | 1.05E-04 |
| cg24229819 | 17 | 41856238 | GeneBody/1st exon         | DUSP3    | -4.855±0.363 | -5.092±0.444 | 6.76E-03 |
| cg16366323 | 17 | 41856855 | TSS1500                   | DUSP3    | -3.935±0.43  | -4.24±0.655  | 6.44E-03 |
| cg24682149 | 17 | 42143817 | GeneBody                  | LSM12    | -4.318±0.559 | -4.685±0.428 | 3.03E-03 |
| cg24615044 | 17 | 42264691 | GeneBody/5'UTR/1st exon   | TMUB2    | -4.583±0.285 | -4.897±0.377 | 1.66E-05 |
| cg24497270 | 17 | 42401753 | GeneBody/5'UTR/1st intron | SLC25A39 | -5.839±0.502 | -6.259±0.54  | 4.06E-04 |
| cg07777378 | 17 | 42422412 | TSS200                    | GRN      | -4.578±0.295 | -4.821±0.432 | 1.31E-03 |
| cg11999384 | 17 | 42422811 | GeneBody/5'UTR/1st intron | GRN      | -4.754±0.562 | -5.092±0.577 | 9.15E-03 |
| cg02505689 | 17 | 42785825 | TSS200                    | DBF4B    | -5.189±0.485 | -5.805±0.639 | 1.37E-06 |
| cg06759215 | 17 | 42786055 | GeneBody/1st exon         | DBF4B    | -4.763±0.335 | -5.133±0.42  | 1.30E-05 |
| cg21452443 | 17 | 43138359 | GeneBody/5'UTR/1st exon   | DCAKD    | -4.951±0.263 | -5.157±0.295 | 9.85E-04 |
| cg19655070 | 17 | 43237981 | TSS1500                   | HEXIM2   | -3.109±0.596 | -3.511±0.673 | 4.33E-03 |
| cg04856689 | 17 | 43862032 | GeneBody/1st intron       | CRHR1    | -3.374±0.789 | -3.887±1.006 | 7.76E-03 |
| cg23202277 | 17 | 43971911 | GeneBody/5'UTR/1st exon   | MAPT     | -4.951±0.47  | -5.326±0.769 | 2.82E-03 |
| cg13940405 | 17 | 45000277 | TSS1500                   | GOSR2    | -4.961±0.444 | -5.35±0.608  | 5.20E-04 |
| cg05114625 | 17 | 45266880 | TSS1500                   | CDC27    | -5.011±0.447 | -5.63±0.679  | 5.17E-07 |
| cg00725143 | 17 | 45608199 | TSS1500                   | NPEPPS   | -4.641±0.388 | -5.104±0.568 | 6.98E-06 |
| cg19573464 | 17 | 45726674 | TSS1500                   | KPNB1    | -5.324±0.359 | -5.581±0.364 | 1.96E-03 |
| cg08736146 | 17 | 45908635 | GeneBody/1st intron       | MRPL10   | -4.832±0.355 | -5.116±0.467 | 1.24E-03 |
| cg00177698 | 17 | 46018875 | TSS200                    | PNPO     | -4.092±0.222 | -4.352±0.381 | 2.65E-05 |
| cg03777405 | 17 | 46125833 | GeneBody/5'UTR/1st intron | NFE2L1   | -3.993±0.491 | -4.509±0.657 | 3.62E-05 |
| cg11194725 | 17 | 46178360 | GeneBody/5'UTR/1st exon   | CBX1     | -4.47±0.481  | -4.945±0.524 | 4.59E-05 |
| cg17778721 | 17 | 46178745 | GeneBody/5'UTR/1st exon   | CBX1     | -4.496±0.406 | -4.823±0.456 | 7.40E-04 |
| cg12563480 | 17 | 46184629 | TSS1500                   | SNX11    | -4.295±0.341 | -4.612±0.655 | 1.24E-03 |
| cg04154812 | 17 | 46908209 | TSS200                    | CALCOCO2 | -2.471±0.227 | -2.612±0.247 | 7.95E-03 |
| cg13362403 | 17 | 46986293 | GeneBody/1st intron       | UBE2Z    | -4.272±0.626 | -4.649±0.616 | 8.56E-03 |
| cg26022315 | 17 | 47021804 | GeneBody/1st intron       | SNF8     | -4.231±0.483 | -4.772±0.461 | 4.64E-06 |
| cg04019407 | 17 | 47046304 | TSS1500                   | GIP      | 1.151±0.579  | 0.76±0.802   | 7.01E-03 |
| cg01446983 | 17 | 47754976 | GeneBody/5'UTR/1st intron | SPOP     | -6.104±0.59  | -6.554±0.551 | 8.82E-04 |
| cg23576473 | 17 | 47785586 | TSS1500                   | SLC35B1  | -4.774±0.446 | -5.222±0.527 | 4.80E-05 |
| cg19668255 | 17 | 47840643 | GeneBody/1st intron       | FAM117A  | -3.834±0.85  | -4.342±0.508 | 5.55E-03 |
| cg18104321 | 17 | 47866115 | GeneBody/5'UTR/1st exon   | KAT7     | -5.328±0.345 | -5.56±0.339  | 3.32E-03 |
| cg03072378 | 17 | 48046738 | GeneBody/5'UTR/1st exon   | DLX4     | -3.812±0.439 | -4.113±0.489 | 3.65E-03 |
| cg14737977 | 17 | 48134226 | GeneBody/1st intron       | ITGA3    | -4.228±0.643 | -4.65±0.668  | 4.64E-03 |
| cg02668984 | 17 | 48172022 | TSS200                    | PKD2     | -4.05±0.411  | -4.323±0.356 | 3.18E-03 |
| cg07231132 | 17 | 48350498 | TSS1500                   | TMEM92   | -3.689±0.332 | -3.931±0.525 | 5.70E-03 |
| cg07569756 | 17 | 48474564 | GeneBody/1st intron       | LRRC59   | -4.779±0.386 | -5.109±0.453 | 4.05E-04 |
| cg18006085 | 17 | 48474872 | GeneBody/5'UTR/1st exon   | LRRC59   | -5.197±0.489 | -5.638±0.715 | 4.51E-04 |
| cg02516388 | 17 | 48503634 | GeneBody/1st exon         | ACSF2    | -4.829±0.578 | -5.329±0.543 | 2.07E-04 |

|            |    |          |                           |              |              |              |          |
|------------|----|----------|---------------------------|--------------|--------------|--------------|----------|
| cg16413777 | 17 | 48555933 | TSS1500                   | RSAD1        | -4.511±0.434 | -4.813±0.447 | 2.78E-03 |
| cg01428361 | 17 | 48556460 | GeneBody/1st intron       | RSAD1        | -5.525±0.544 | -5.922±0.587 | 1.87E-03 |
| cg09514188 | 17 | 48942734 | GeneBody/5'UTR/1st intron | TOB1         | -4.624±0.473 | -5.048±0.593 | 2.70E-04 |
| cg23966705 | 17 | 49198586 | TSS1500                   | SPAG9        | -5.054±0.466 | -5.332±0.353 | 6.59E-03 |
| cg25716740 | 17 | 49337652 | TSS1500                   | MBTD1        | -5.47±0.506  | -5.837±0.438 | 1.33E-03 |
| cg16950616 | 17 | 53045046 | GeneBody/1st intron       | COX11        | -2.697±0.174 | -2.862±0.345 | 1.24E-03 |
| cg15002214 | 17 | 54670370 | TSS1500                   | NOG          | -5.444±0.634 | -5.946±0.794 | 1.19E-03 |
| cg20676542 | 17 | 54991456 | TSS200                    | TRIM25       | -4.704±0.374 | -4.973±0.522 | 4.23E-03 |
| cg01776246 | 17 | 55038508 | TSS200                    | COIL         | -3.815±0.484 | -4.13±0.617  | 7.60E-03 |
| cg07844021 | 17 | 55038529 | TSS200                    | COIL         | -3.473±0.415 | -3.815±0.662 | 1.82E-03 |
| cg21409722 | 17 | 55162050 | TSS1500                   | AKAP1        | -3.613±0.509 | -3.942±0.656 | 8.21E-03 |
| cg18503387 | 17 | 55927006 | GeneBody/1st intron       | MRPS23       | -5.827±0.501 | -4.148±0.564 | 6.59E-03 |
| cg06957329 | 17 | 55927468 | TSS200                    | MRPS23       | -5.07±0.444  | -5.393±0.469 | 1.86E-03 |
| cg06723357 | 17 | 55981642 | TSS1500                   | CUEDC1       | 0.414±0.489  | 0.014±0.606  | 8.00E-04 |
| cg22308759 | 17 | 56064928 | GeneBody/1st intron       | VEZF1        | -5.001±0.342 | -5.31±0.403  | 2.07E-04 |
| cg12314510 | 17 | 56161063 | GeneBody/5'UTR/1st intron | DYNLL2       | -4.26±0.411  | -4.633±0.618 | 4.74E-04 |
| cg14996805 | 17 | 56430170 | TSS1500                   | SUPT4H1      | -5.552±0.68  | -5.953±0.637 | 9.33E-03 |
| cg04780629 | 17 | 56494964 | TSS200                    | RNF43        | -4.515±0.508 | -4.825±0.448 | 6.75E-03 |
| cg07318658 | 17 | 56594994 | GeneBody/5'UTR/1st intron | MTMR4        | -3.797±0.251 | -4.068±0.353 | 3.00E-05 |
| cg16904599 | 17 | 57287367 | TSS200                    | SMG8         | -4.627±0.352 | -5.006±0.389 | 1.24E-05 |
| cg23546413 | 17 | 57298079 | GeneBody/1st exon         | GDPD1        | -5.578±0.488 | -6.334±0.648 | 2.40E-08 |
| cg11000221 | 17 | 57643293 | GeneBody/1st intron       | DHX40        | -4.539±0.546 | -4.975±0.689 | 1.12E-03 |
| cg00547829 | 17 | 57970161 | GeneBody/5'UTR/1st exon   | TUBD1        | -4.533±0.532 | -4.907±0.673 | 3.94E-03 |
| cg15802192 | 17 | 57970418 | GeneBody/5'UTR/1st exon   | RPS6KB1      | -5.307±0.303 | -5.716±0.509 | 1.71E-06 |
| cg25905459 | 17 | 58041636 | GeneBody/1st intron       | RNFT1        | -3.939±0.342 | -4.183±0.452 | 3.91E-03 |
| cg27541374 | 17 | 58042493 | TSS1500                   | RNFT1        | -4.133±0.396 | -4.526±0.658 | 2.53E-04 |
| cg13790571 | 17 | 58156411 | TSS200                    | HEATR6       | -4.386±0.371 | -4.781±0.466 | 2.29E-05 |
| cg17179099 | 17 | 58603287 | GeneBody/1st exon         | APBP2        | -5.762±0.462 | -6.17±0.453  | 1.71E-04 |
| cg14623313 | 17 | 58603785 | TSS1500                   | APBP2        | -3.518±0.463 | -3.19±0.517  | 2.74E-03 |
| cg06090421 | 17 | 58677051 | TSS1500                   | PPM1D        | -4.364±0.359 | -4.688±0.564 | 6.39E-04 |
| cg10673984 | 17 | 58677844 | GeneBody/1st exon         | PPM1D        | -5.62±0.475  | -6.156±0.624 | 1.07E-05 |
| cg20235051 | 17 | 59489852 | GeneBody/1st exon         | C17orf82     | -5.172±0.652 | -5.765±0.533 | 8.24E-05 |
| cg17894008 | 17 | 59668604 | TSS200                    | NACA2        | 2.677±0.55   | 2.148±0.918  | 3.87E-04 |
| cg05986149 | 17 | 59941055 | TSS200                    | BRIP1        | -3.116±0.463 | -2.758±0.554 | 1.33E-03 |
| cg27513764 | 17 | 60457961 | GeneBody/5'UTR/1st exon   | EFCAB3       | 0.94±0.817   | 0.447±0.871  | 9.63E-03 |
| cg06849227 | 17 | 61599694 | TSS1500                   | KCNH6        | 3.932±0.778  | 3.36±1.324   | 6.94E-03 |
| cg14750190 | 17 | 61678092 | TSS200                    | TACO1        | -5.024±0.437 | -5.375±0.505 | 7.92E-04 |
| cg00053292 | 17 | 61678300 | GeneBody/5'UTR/1st exon   | TACO1        | -4.582±0.466 | -5.034±0.585 | 9.52E-05 |
| cg14309281 | 17 | 61700072 | GeneBody/5'UTR/1st exon   | MAP3K3       | -6.318±0.56  | -6.697±0.701 | 5.29E-03 |
| cg05797656 | 17 | 61851352 | TSS200                    | DDX42        | -4.602±0.569 | -4.941±0.458 | 7.21E-03 |
| cg22520471 | 17 | 61851767 | GeneBody/5'UTR/1st intron | DDX42        | -4.899±0.624 | -5.373±0.561 | 8.96E-04 |
| cg11296363 | 17 | 61905004 | GeneBody/5'UTR/1st exon   | FTSJ3        | -5.15±0.576  | -5.493±0.586 | 9.69E-03 |
| cg12577610 | 17 | 61920423 | TSS200                    | SMARCD2      | -5.202±0.658 | -5.676±0.615 | 1.62E-03 |
| cg12911791 | 17 | 61988811 | TSS200                    | CSHL1        | 0.878±0.367  | 0.615±0.568  | 6.12E-03 |
| cg10207917 | 17 | 61997029 | TSS1500                   | GH1          | 0.121±0.184  | -0.011±0.293 | 6.86E-03 |
| cg11336428 | 17 | 62340505 | GeneBody/5'UTR/1st intron | TEX2         | -3.765±0.223 | -3.928±0.277 | 2.53E-03 |
| cg18312782 | 17 | 62341028 | TSS1500                   | TEX2         | -3.009±0.429 | -3.272±0.404 | 6.99E-03 |
| cg04808672 | 17 | 62658750 | TSS1500                   | SMURF2       | -4.605±0.382 | -4.884±0.593 | 5.30E-03 |
| cg08831701 | 17 | 65241304 | GeneBody/5'UTR/1st exon   | HELZ         | -4.352±0.301 | -4.62±0.372  | 2.95E-04 |
| cg26387998 | 17 | 65241484 | TSS200                    | HELZ         | -4.416±0.29  | -4.699±0.46  | 2.47E-04 |
| cg12398397 | 17 | 65820969 | TSS1500                   | BPTF         | -4.155±0.655 | -4.66±0.638  | 8.45E-04 |
| cg16435601 | 17 | 65822392 | GeneBody/1st exon         | BPTF         | -5.183±0.48  | -5.961±0.843 | 5.07E-08 |
| cg14572485 | 17 | 66244196 | GeneBody/5'UTR/1st exon   | AMZ2         | -5.533±0.614 | -6.025±0.643 | 6.39E-04 |
| cg00214346 | 17 | 66508517 | TSS200                    | PRKAR1A      | -5.289±0.528 | -5.644±0.481 | 3.04E-03 |
| cg11651717 | 17 | 67323282 | GeneBody/5'UTR/1st exon   | ABCA5        | -5.605±0.632 | -6.093±0.571 | 7.42E-04 |
| cg24332433 | 17 | 71088903 | TSS200                    | SLC39A11     | -3.66±0.296  | -3.882±0.52  | 6.61E-03 |
| cg05815893 | 17 | 71228832 | GeneBody/5'UTR/1st exon   | C17orf80     | -4.146±0.482 | -4.461±0.545 | 5.66E-03 |
| cg11394644 | 17 | 71229370 | GeneBody/5'UTR            | C17orf80     | -3.826±0.473 | -4.283±0.688 | 1.91E-04 |
| cg23333306 | 17 | 71307514 | GeneBody/5'UTR/1st intron | CDC42EP4     | -5.105±0.435 | -5.699±0.613 | 4.27E-07 |
| cg19598544 | 17 | 72209156 | GeneBody/1st exon         | MGC16275     | -4.462±0.243 | -4.806±0.494 | 3.52E-06 |
| cg22325823 | 17 | 72667062 | TSS200                    | RAB37        | -1.718±0.55  | -2.237±0.722 | 1.70E-04 |
| cg21922841 | 17 | 72744131 | TSS1500                   | SLC9A3R1     | -3.072±0.487 | -3.427±0.581 | 2.42E-03 |
| cg06624832 | 17 | 72772340 | GeneBody/5'UTR/1st intron | NAT9         | -5.056±0.299 | -5.466±0.501 | 1.25E-06 |
| cg00032227 | 17 | 72772512 | TSS200                    | NAT9         | -4.93±0.368  | -5.273±0.633 | 6.68E-04 |
| cg11263584 | 17 | 73008587 | TSS200                    | ICT1         | -5.042±0.425 | -5.318±0.381 | 4.07E-03 |
| cg10520594 | 17 | 73127197 | GeneBody                  | NTSC         | -4.108±0.367 | -4.419±0.534 | 9.60E-04 |
| cg17065601 | 17 | 73179370 | TSS1500                   | SUMO2        | -5.005±0.362 | -5.492±0.621 | 2.18E-06 |
| cg22226765 | 17 | 73257283 | GeneBody/1st intron       | GGA3         | -4.164±0.32  | -4.4±0.245   | 9.37E-04 |
| cg19586645 | 17 | 73266642 | TSS1500                   | MIF4GD       | -4.92±0.268  | -5.408±0.425 | 9.44E-10 |
| cg20590849 | 17 | 73267439 | GeneBody/1st exon         | LOC100287042 | -5.74±0.466  | -6.447±0.814 | 2.13E-07 |
| cg00901704 | 17 | 73285325 | GeneBody/5'UTR/1st intron | SLC25A19     | -4.114±0.423 | -4.362±0.346 | 8.39E-03 |
| cg09509576 | 17 | 73402025 | TSS200                    | MIR3678      | -3.797±0.264 | -3.993±0.359 | 2.98E-03 |
| cg20366832 | 17 | 73520850 | TSS1500                   | LLGL2        | -0.906±0.46  | -1.199±0.545 | 7.61E-03 |
| cg15820189 | 17 | 73663551 | GeneBody/1st exon         | SAP30BP      | -5.047±0.587 | -5.534±0.658 | 5.14E-04 |
| cg24291845 | 17 | 73851885 | TSS1500                   | WBP2         | -5.083±0.426 | -5.382±0.683 | 8.21E-03 |
| cg11653266 | 17 | 73901339 | TSS200                    | MRPL38       | -5.135±0.379 | -5.364±0.391 | 8.82E-03 |
| cg23110832 | 17 | 74261128 | TSS200                    | UBALD2       | -4.593±0.39  | -4.831±0.423 | 9.10E-03 |
| cg07126839 | 17 | 74261637 | GeneBody/1st exon         | UBALD2       | -5.079±0.409 | -5.486±0.55  | 8.66E-05 |
| cg12612336 | 17 | 74350433 | TSS1500                   | PRPSAP1      | -5.098±0.346 | -5.585±0.508 | 2.91E-07 |
| cg17399352 | 17 | 74379779 | TSS1500                   | SPHK1        | -5.291±0.564 | -5.76±0.536  | 3.41E-04 |
| cg07775675 | 17 | 74379922 | TSS1500                   | SPHK1        | -4.214±0.411 | -4.599±0.557 | 2.09E-04 |
| cg07851243 | 17 | 74707271 | TSS1500                   | MXRA7        | -4.461±0.385 | -4.762±0.43  | 9.72E-04 |
| cg19125323 | 17 | 74733470 | GeneBody/5'UTR/1st exon   | SRSF2        | -5.889±0.655 | -6.277±0.625 | 9.30E-03 |
| cg25344639 | 17 | 75137144 | GeneBody/5'UTR/1st exon   | SEC14L1      | -4.479±0.575 | -4.98±0.613  | 2.47E-04 |
| cg18907029 | 17 | 76165253 | GeneBody/1st intron       | SYNGR2       | -5.082±0.275 | -5.337±0.456 | 5.72E-04 |
| cg08024766 | 17 | 76777877 | GeneBody/1st intron       | CYTH1        | -3.679±0.466 | -3.352±0.523 | 2.95E-03 |
| cg03493069 | 17 | 76778892 | TSS1500                   | CYTH1        | -4.314±0.361 | -4.656±0.454 | 1.37E-04 |
| cg06508934 | 17 | 76921095 | GeneBody/1st exon         | TIMP2        | -4.818±0.374 | -5.151±0.713 | 1.88E-03 |
| cg01107741 | 17 | 77006080 | TSS200                    | CANT1        | -4.211±0.377 | -4.552±0.632 | 8.36E-04 |
| cg17348429 | 17 | 77705081 | GeneBody/1st exon         | ENPP7        | 2.133±0.539  | 1.712±0.627  | 1.10E-03 |
| cg20269976 | 17 | 78074920 | TSS1500                   | GAA          | -4.319±0.534 | -4.727±0.573 | 1.15E-03 |
| cg08465510 | 17 | 78193874 | TSS1500                   | SLC26A11     | -3.527±0.323 | -3.736±0.377 | 6.58E-03 |
| cg15600835 | 17 | 78518556 | TSS200                    | RPTOR        | -4.152±0.584 | -4.607±0.709 | 1.27E-03 |
| cg26717786 | 17 | 79139685 | GeneBody/1st intron       | AATK         | -3.425±0.353 | -3.727±0.529 | 9.50E-04 |
| cg07423906 | 17 | 79212344 | GeneBody/1st intron       | ENTHD2       | -4.205±0.309 | -4.483±0.47  | 5.59E-04 |

|            |    |          |                           |                  |              |              |          |
|------------|----|----------|---------------------------|------------------|--------------|--------------|----------|
| cg15913671 | 17 | 79304420 | GeneBody/5'UTR/1st exon   | <i>TMEM105</i>   | -0.43±0.568  | -0.809±0.637 | 4.65E-03 |
| cg12693135 | 17 | 79651124 | GeneBody/1st exon         | <i>HGS</i>       | -4.632±0.365 | -4.89±0.527  | 5.42E-03 |
| cg23033866 | 17 | 79670804 | GeneBody/1st intron       | <i>MRPL12</i>    | -4.272±0.215 | -4.472±0.33  | 3.88E-04 |
| cg09085639 | 17 | 79670810 | GeneBody/1st intron       | <i>MRPL12</i>    | -4.047±0.208 | -4.34±0.368  | 1.24E-06 |
| cg10299667 | 17 | 79679470 | GeneBody/1st exon         | <i>SLC25A10</i>  | -5.471±0.497 | -5.896±0.57  | 3.81E-04 |
| cg21039822 | 17 | 79869136 | TSS200                    | <i>PCYT2</i>     | -5.599±0.504 | -6.071±0.65  | 1.74E-04 |
| cg15118204 | 17 | 79876231 | TSS200                    | <i>SIRT7</i>     | -1.888±0.157 | -2.035±0.159 | 7.95E-05 |
| cg21396405 | 17 | 79885587 | GeneBody/5'UTR/1st exon   | <i>MAFG</i>      | -5.546±0.432 | -5.914±0.578 | 6.67E-04 |
| cg25759517 | 17 | 79895006 | TSS200                    | <i>PYCR1</i>     | -5.032±0.476 | -5.355±0.588 | 5.09E-03 |
| cg10645943 | 17 | 79980825 | TSS200                    | <i>STRA13</i>    | -5.028±0.669 | -5.526±0.693 | 1.41E-03 |
| cg01350700 | 17 | 79995808 | TSS1500                   | <i>DCXR</i>      | -4.552±0.589 | -5.097±0.693 | 1.48E-04 |
| cg24200059 | 17 | 80375975 | TSS1500                   | <i>HEXDC</i>     | -3.034±0.319 | -3.285±0.373 | 1.05E-03 |
| cg08799191 | 17 | 80376884 | TSS1500                   | <i>OGFOD3</i>    | -3.656±0.412 | -4.132±0.58  | 9.69E-06 |
| cg05348272 | 17 | 80710049 | GeneBody/5'UTR/1st exon   | <i>TBCD</i>      | -5.393±0.467 | -5.794±0.728 | 1.08E-03 |
| cg26516954 | 17 | 81009758 | TSS200                    | <i>B3GNTL1</i>   | -5.556±0.443 | -5.873±0.61  | 4.25E-03 |
| cg02273078 | 18 | 158567   | GeneBody/5'UTR/1st exon   | <i>USP14</i>     | -6.041±0.447 | -6.566±0.757 | 2.18E-05 |
| cg14671488 | 18 | 811809   | GeneBody/5'UTR/1st intron | <i>YES1</i>      | -2.876±0.551 | -3.257±0.694 | 4.49E-03 |
| cg16932672 | 18 | 2571333  | GeneBody/5'UTR/1st exon   | <i>METTL4</i>    | -4.565±0.594 | -5.283±0.795 | 3.53E-06 |
| cg21351102 | 18 | 3247294  | TSS1500                   | <i>MYL12A</i>    | -4.777±0.385 | -5.017±0.431 | 8.28E-03 |
| cg21872393 | 18 | 3247654  | GeneBody/5'UTR/1st exon   | <i>MYL12A</i>    | -4.859±0.336 | -5.093±0.303 | 2.20E-03 |
| cg04319097 | 18 | 5293279  | GeneBody/5'UTR            | <i>ZBTB14</i>    | 2.23±0.29    | 2.415±0.357  | 8.82E-03 |
| cg17905198 | 18 | 9103090  | GeneBody/1st intron       | <i>NDUFV2</i>    | -5.246±0.442 | -5.514±0.45  | 8.37E-03 |
| cg06461769 | 18 | 9335102  | GeneBody/5'UTR/1st intron | <i>TWSG1</i>     | -5.499±0.429 | -5.958±0.647 | 5.04E-05 |
| cg19058629 | 18 | 9475884  | GeneBody/5'UTR/1st intron | <i>RALBP1</i>    | -1.735±0.538 | -2.115±0.586 | 3.02E-03 |
| cg03862540 | 18 | 9614206  | GeneBody                  | <i>PPP4R1</i>    | -4.986±0.265 | -5.218±0.37  | 5.31E-04 |
| cg26328002 | 18 | 10455463 | GeneBody/1st intron       | <i>APCDD1</i>    | -3.661±0.472 | -4.022±0.569 | 1.53E-03 |
| cg02159896 | 18 | 11908181 | GeneBody/1st intron       | <i>MPPE1</i>     | -4.863±0.52  | -5.279±0.615 | 8.96E-04 |
| cg22467216 | 18 | 12308812 | GeneBody                  | <i>TUBB6</i>     | -5.365±0.609 | -5.876±0.642 | 3.77E-04 |
| cg24300924 | 18 | 12407808 | TSS200                    | <i>SLMO1</i>     | -5.016±0.434 | -5.411±0.519 | 1.95E-04 |
| cg04510262 | 18 | 12884175 | GeneBody/5'UTR/1st exon   | <i>PTPN2</i>     | -5.086±0.483 | -5.464±0.621 | 1.42E-03 |
| cg14013604 | 18 | 12884564 | TSS1500                   | <i>PTPN2</i>     | -4.426±0.449 | -4.861±0.467 | 5.34E-05 |
| cg09685104 | 18 | 13726506 | GeneBody/5'UTR/1st exon   | <i>FAM210A</i>   | -6.212±0.533 | -6.917±0.657 | 4.29E-07 |
| cg00178790 | 18 | 13726864 | GeneBody/5'UTR/1st intron | <i>RNMT</i>      | -4.359±0.252 | -4.547±0.243 | 1.17E-03 |
| cg11564670 | 18 | 13915006 | GeneBody/5'UTR/1st intron | <i>MC2R</i>      | 2.445±0.624  | 1.96±0.853   | 1.86E-03 |
| cg00335286 | 18 | 13916355 | TSS1500                   | <i>MC2R</i>      | -0.273±0.556 | -0.625±0.621 | 7.10E-03 |
| cg22792432 | 18 | 18691067 | GeneBody/5'UTR/1st exon   | <i>ROCK1</i>     | -6.18±0.602  | -7.09±0.746  | 2.99E-08 |
| cg25291907 | 18 | 19321706 | GeneBody/1st exon         | <i>MIB1</i>      | -5.828±0.416 | -6.313±0.688 | 2.16E-05 |
| cg02366059 | 18 | 21017616 | GeneBody/1st intron       | <i>TMEM241</i>   | -2.673±0.477 | -2.165±0.495 | 1.28E-05 |
| cg07851278 | 18 | 21033426 | GeneBody/1st exon         | <i>RIOK3</i>     | -4.858±0.401 | -5.113±0.362 | 4.86E-03 |
| cg18175410 | 18 | 21083641 | GeneBody/1st exon         | <i>C18orf8</i>   | -5.752±0.456 | -6.079±0.522 | 2.57E-03 |
| cg16511708 | 18 | 23671264 | TSS1500                   | <i>SS18</i>      | -4.918±0.399 | -5.212±0.448 | 1.87E-03 |
| cg15259973 | 18 | 29078565 | GeneBody/1st intron       | <i>DSG2</i>      | -3.096±0.503 | -3.59±0.595  | 6.42E-05 |
| cg24711626 | 18 | 29522957 | GeneBody/5'UTR/1st exon   | <i>TRAPPC8</i>   | -6.036±0.558 | -6.492±0.681 | 7.71E-04 |
| cg11314292 | 18 | 29598433 | TSS200                    | <i>RNF125</i>    | -3.913±0.436 | -4.187±0.479 | 7.31E-03 |
| cg18382305 | 18 | 31021065 | TSS1500                   | <i>CCDC178</i>   | 0.28±0.471   | -0.049±0.718 | 7.16E-03 |
| cg25227148 | 18 | 32870611 | GeneBody/1st intron       | <i>ZNF271</i>    | -4.511±0.494 | -4.906±0.571 | 8.59E-04 |
| cg03161112 | 18 | 32924652 | TSS1500                   | <i>ZNF24</i>     | -4.328±0.464 | -4.642±0.5   | 3.82E-03 |
| cg03776551 | 18 | 32956850 | GeneBody/5'UTR/1st intron | <i>ZNF396</i>    | -5.247±0.572 | -5.609±0.585 | 6.13E-03 |
| cg09003876 | 18 | 33552519 | TSS200                    | <i>C18orf21</i>  | -5.613±0.302 | -5.931±0.465 | 7.00E-05 |
| cg08803129 | 18 | 33708920 | GeneBody/5'UTR/1st intron | <i>SLC39A6</i>   | -5.596±0.618 | -6.098±0.468 | 3.21E-04 |
| cg20839219 | 18 | 33710235 | GeneBody/1st intron       | <i>ELP2</i>      | -4.319±0.439 | -4.628±0.475 | 2.77E-03 |
| cg08015253 | 18 | 33767315 | TSS200                    | <i>MOCOS</i>     | -4.469±0.216 | -4.643±0.244 | 7.43E-04 |
| cg19837131 | 18 | 39535061 | TSS200                    | <i>PIK3C3</i>    | -3.761±0.759 | -4.3±0.761   | 2.17E-03 |
| cg22039287 | 18 | 40696075 | TSS1500                   | <i>RIT2</i>      | 0.996±0.603  | 0.547±0.79   | 2.56E-03 |
| cg10732834 | 18 | 43498793 | GeneBody                  | <i>EPG5</i>      | 1.667±0.263  | 1.843±0.269  | 4.15E-03 |
| cg03029145 | 18 | 45456587 | GeneBody/5'UTR/1st intron | <i>SMAD2</i>     | -4.251±0.342 | -4.57±0.593  | 7.02E-04 |
| cg11611854 | 18 | 47018756 | GeneBody/5'UTR/1st exon   | <i>RPL17</i>     | -4.425±0.407 | -4.736±0.508 | 1.76E-03 |
| cg26137790 | 18 | 47340501 | GeneBody/1st exon         | <i>SCARNA17</i>  | -5.499±0.485 | -5.856±0.526 | 1.76E-03 |
| cg13423076 | 18 | 47814178 | GeneBody/5'UTR/1st exon   | <i>CXXC1</i>     | -5.015±0.469 | -5.543±0.552 | 7.03E-06 |
| cg20016845 | 18 | 47814312 | GeneBody/5'UTR/1st exon   | <i>CXXC1</i>     | -4.858±0.457 | -5.318±0.636 | 8.31E-05 |
| cg06883149 | 18 | 47901188 | TSS1500                   | <i>SKA1</i>      | -4.885±0.486 | -5.245±0.453 | 1.24E-03 |
| cg01313966 | 18 | 47901443 | GeneBody/5'UTR/1st exon   | <i>SKA1</i>      | -4.812±0.331 | -5.044±0.466 | 5.34E-03 |
| cg19355919 | 18 | 48346593 | TSS200                    | <i>MRO</i>       | -4.333±0.306 | -4.625±0.438 | 2.01E-04 |
| cg26909431 | 18 | 48556216 | TSS1500                   | <i>SMAD4</i>     | -4.023±0.368 | -3.677±0.39  | 8.83E-05 |
| cg10315128 | 18 | 48556631 | GeneBody/5'UTR/1st exon   | <i>SMAD4</i>     | -4.773±0.287 | -5.073±0.449 | 8.71E-05 |
| cg02447314 | 18 | 51796331 | GeneBody/1st intron       | <i>POLI</i>      | -4.94±0.483  | -5.318±0.497 | 8.12E-04 |
| cg00381076 | 18 | 51884797 | TSS1500                   | <i>C18orf54</i>  | -4.228±0.292 | -4.481±0.546 | 2.39E-03 |
| cg06765434 | 18 | 54305287 | GeneBody/1st intron       | <i>TXNL1</i>     | -4.461±0.284 | -4.694±0.246 | 3.36E-04 |
| cg04099673 | 18 | 54318390 | TSS1500                   | <i>WDR7</i>      | -4.863±0.509 | -5.235±0.682 | 3.25E-03 |
| cg17709676 | 18 | 57026192 | GeneBody/1st intron       | <i>LMAN1</i>     | -5.232±0.433 | -5.517±0.405 | 3.78E-03 |
| cg26330371 | 18 | 57026799 | TSS1500                   | <i>LMAN1</i>     | -3.225±0.194 | -3.381±0.325 | 2.98E-03 |
| cg08554462 | 18 | 60986911 | TSS1500                   | <i>BCL2</i>      | -3.551±0.382 | -3.79±0.378  | 6.40E-03 |
| cg14455307 | 18 | 60987429 | TSS1500                   | <i>BCL2</i>      | -5.463±0.361 | -5.783±0.51  | 4.95E-04 |
| cg11255230 | 18 | 60987808 | TSS1500                   | <i>BCL2</i>      | -4.664±0.531 | -4.992±0.525 | 6.93E-03 |
| cg23613305 | 18 | 61034556 | TSS200                    | <i>KDSR</i>      | -5.523±0.598 | -6.047±0.634 | 2.24E-04 |
| cg05934874 | 18 | 61089154 | GeneBody/1st intron       | <i>VPS4B</i>     | -4.244±0.391 | -4.612±0.533 | 1.98E-04 |
| cg00226904 | 18 | 61157065 | GeneBody                  | <i>SERPINB5</i>  | 0.67±0.461   | 0.349±0.634  | 5.34E-03 |
| cg10533434 | 18 | 61329226 | TSS200                    | <i>SERPINB3</i>  | 0.499±0.699  | -0.234±0.678 | 1.40E-05 |
| cg01722450 | 18 | 61816636 | TSS1500                   | <i>LINC00305</i> | 2.229±0.797  | 1.611±1.022  | 1.61E-03 |
| cg07457944 | 18 | 67957061 | GeneBody/5'UTR/1st intron | <i>SOC5</i>      | -4.101±0.372 | -4.347±0.471 | 6.75E-03 |
| cg03954150 | 18 | 71815372 | TSS1500                   | <i>FBXO15</i>    | -5.197±0.377 | -5.475±0.357 | 1.30E-03 |
| cg10878998 | 18 | 71959092 | GeneBody/1st exon         | <i>CYB5A</i>     | -3.46±0.425  | -3.796±0.576 | 1.58E-03 |
| cg27662877 | 18 | 71959595 | TSS1500                   | <i>CYB5A</i>     | -4.717±0.638 | -5.184±0.836 | 3.00E-03 |
| cg01794711 | 18 | 72163198 | TSS1500                   | <i>CNDP2</i>     | -5.03±0.362  | -5.352±0.416 | 2.70E-04 |
| cg22080282 | 18 | 72920932 | GeneBody/1st exon         | <i>ZADH2</i>     | -3.363±0.186 | -3.505±0.256 | 2.32E-03 |
| cg16961218 | 18 | 76829143 | TSS1500                   | <i>ATP9B</i>     | -5.056±0.285 | -5.407±0.593 | 5.24E-05 |
| cg06973760 | 18 | 77154869 | TSS1500                   | <i>NFATC1</i>    | -4.274±0.44  | -4.645±0.471 | 3.84E-04 |
| cg17357984 | 19 | 532039   | GeneBody/1st exon         | <i>CDC34</i>     | -4.989±0.389 | -5.368±0.447 | 6.44E-05 |
| cg01532103 | 19 | 571107   | TSS200                    | <i>BSG</i>       | -4.183±0.638 | -4.613±0.505 | 2.43E-03 |
| cg17283268 | 19 | 633490   | GeneBody/1st exon         | <i>POLRMT</i>    | -4.763±0.359 | -5.081±0.581 | 8.89E-04 |
| cg18384168 | 19 | 639746   | TSS200                    | <i>FGF22</i>     | -4.945±0.512 | -5.327±0.805 | 4.49E-03 |
| cg02364038 | 19 | 797109   | TSS1500                   | <i>PTBP1</i>     | -4.763±0.528 | -5.153±0.757 | 3.58E-03 |
| cg25536300 | 19 | 797459   | GeneBody/5'UTR/1st exon   | <i>PTBP1</i>     | -6.299±0.61  | -6.724±0.694 | 3.25E-03 |
| cg21552947 | 19 | 893353   | TSS200                    | <i>MED16</i>     | -4.668±0.47  | -5.048±0.616 | 1.11E-03 |
| cg18022193 | 19 | 913536   | TSS1500                   | <i>R3HDM4</i>    | -4.799±0.409 | -5.478±0.571 | 7.25E-09 |

|            |    |          |                           |           |              |              |          |
|------------|----|----------|---------------------------|-----------|--------------|--------------|----------|
| cg25467603 | 19 | 984168   | TSS200                    | WDR18     | -5.778±0.528 | -6.42±0.738  | 3.89E-06 |
| cg20147100 | 19 | 1020733  | GeneBody/1st intron       | TMEM259   | -5.229±0.593 | -5.578±0.564 | 9.70E-03 |
| cg10749413 | 19 | 1041020  | GeneBody/5'UTR/1st intron | ABCA7     | -4.803±0.3   | -5.234±0.469 | 3.03E-07 |
| cg05989429 | 19 | 1041026  | GeneBody/5'UTR/1st intron | ABCA7     | -5.368±0.585 | -5.726±0.414 | 5.17E-03 |
| cg04402021 | 19 | 1094921  | GeneBody/1st intron       | POLR2E    | -5.084±0.52  | -5.483±0.496 | 8.75E-04 |
| cg06864275 | 19 | 1174154  | GeneBody/5'UTR/1st intron | SBNO2     | -5.204±0.434 | -5.571±0.604 | 8.14E-04 |
| cg21547976 | 19 | 1206451  | GeneBody/5'UTR/1st exon   | STK11     | -4.789±0.401 | -5.242±0.671 | 3.79E-05 |
| cg25622628 | 19 | 1275762  | GeneBody/1st exon         | C19orf24  | -5.51±0.478  | -5.929±0.619 | 4.09E-04 |
| cg17669700 | 19 | 1384167  | GeneBody/1st intron       | NDUFS7    | -5.356±0.609 | -5.756±0.555 | 3.72E-03 |
| cg00308133 | 19 | 1401118  | GeneBody/1st intron       | GAMT      | -5.388±0.522 | -5.918±0.753 | 8.66E-05 |
| cg17765461 | 19 | 1408416  | GeneBody/1st intron       | DAZAP1    | -3.872±0.615 | -4.291±0.618 | 3.16E-03 |
| cg19939660 | 19 | 2097096  | GeneBody/1st exon         | IZUMO4    | -5.169±0.498 | -5.758±0.532 | 2.30E-06 |
| cg14223017 | 19 | 2151266  | GeneBody/1st exon         | AP3D1     | -2.059±0.422 | -1.614±0.449 | 1.55E-05 |
| cg02252907 | 19 | 2151887  | TSS1500                   | AP3D1     | -4.616±0.66  | -5.269±0.68  | 3.84E-05 |
| cg15927263 | 19 | 2236466  | TSS200                    | PLEKHJ1   | -5.016±0.333 | -5.242±0.458 | 6.63E-03 |
| cg00040861 | 19 | 2328391  | GeneBody                  | LSM7      | -5.27±0.496  | -5.582±0.587 | 8.25E-03 |
| cg14047244 | 19 | 2457194  | TSS1500                   | LMNB2     | -4.648±0.323 | -4.962±0.428 | 1.12E-04 |
| cg16188243 | 19 | 2783719  | TSS1500                   | SGTA      | -3.195±0.542 | -3.683±0.651 | 2.24E-04 |
| cg06609049 | 19 | 2785107  | TSS1500                   | THOP1     | -1.119±0.526 | -0.766±0.628 | 5.07E-03 |
| cg12111697 | 19 | 2841391  | TSS200                    | ZNF555    | -5.144±0.549 | -5.53±0.714  | 4.19E-03 |
| cg18414741 | 19 | 2945201  | TSS1500                   | ZNF77     | -5.879±0.517 | -6.229±0.803 | 9.72E-03 |
| cg26114571 | 19 | 3225002  | GeneBody/1st intron       | CEL5      | -5.44±0.445  | -5.714±0.511 | 9.46E-03 |
| cg25834275 | 19 | 3359809  | GeneBody/1st intron       | NFIC      | -6.031±0.448 | -6.349±0.538 | 3.18E-03 |
| cg25058957 | 19 | 3771683  | GeneBody                  | RAX2      | 3.304±0.91   | 2.659±1.022  | 2.74E-03 |
| cg06807379 | 19 | 3971119  | TSS1500                   | DAPK3     | -4.522±0.502 | -4.92±0.732  | 1.98E-03 |
| cg17655576 | 19 | 4007179  | TSS1500                   | PIAS4     | -5.351±0.66  | -5.762±0.639 | 6.40E-03 |
| cg13619768 | 19 | 4008209  | GeneBody/1st intron       | PIAS4     | -5.115±0.5   | -5.458±0.526 | 3.23E-03 |
| cg10633491 | 19 | 4066815  | GeneBody/5'UTR/1st exon   | ZBTB7A    | -4.869±0.445 | -5.157±0.61  | 9.81E-03 |
| cg10561472 | 19 | 4066818  | TSS200                    | ZBTB7A    | -4.821±0.644 | -5.226±0.587 | 5.42E-03 |
| cg20789620 | 19 | 4304334  | TSS1500                   | FSD1      | 0.63±0.499   | 0.24±0.73    | 2.27E-03 |
| cg24923526 | 19 | 4400879  | TSS1500                   | SH3GL1    | -4.481±0.437 | -4.883±0.58  | 2.42E-04 |
| cg04765929 | 19 | 4639662  | GeneBody/5'UTR/1st intron | TNFAIP8L1 | -5.102±0.66  | -5.546±0.957 | 8.27E-03 |
| cg26336164 | 19 | 4791680  | TSS200                    | FEM1A     | -5.826±0.685 | -6.347±0.838 | 1.67E-03 |
| cg22563182 | 19 | 5680756  | TSS200                    | HSD11B1L  | -5.24±0.448  | -5.524±0.404 | 4.96E-03 |
| cg25136310 | 19 | 5690528  | GeneBody/1st exon         | RPL36     | -4.191±0.275 | -4.389±0.329 | 2.82E-03 |
| cg13451483 | 19 | 5720795  | GeneBody/1st exon         | CATSPERD  | -5.041±0.584 | -5.4±0.638   | 8.70E-03 |
| cg18109231 | 19 | 6110877  | TSS1500                   | RFX2      | -4.564±0.307 | -4.853±0.343 | 9.98E-05 |
| cg00901766 | 19 | 6279546  | GeneBody/1st intron       | MLLT1     | -3.441±0.321 | -3.709±0.587 | 3.03E-03 |
| cg25221254 | 19 | 6333547  | GeneBody/1st exon         | ACER1     | 1.985±0.573  | 1.612±0.749  | 8.05E-03 |
| cg17756392 | 19 | 6361455  | TSS200                    | CLPP      | -4.331±0.214 | -4.472±0.311 | 9.74E-03 |
| cg03925809 | 19 | 6393419  | TSS200                    | GTF2F1    | -5.994±0.549 | -6.379±0.611 | 2.96E-03 |
| cg22889448 | 19 | 6886962  | TSS1500                   | EMR1      | -0.002±0.582 | -0.412±0.695 | 3.32E-03 |
| cg17159537 | 19 | 7554074  | TSS200                    | PEX11G    | -4.1±0.348   | -4.445±0.507 | 1.31E-04 |
| cg23350087 | 19 | 7587498  | GeneBody/5'UTR/1st exon   | MCOLN1    | -5.257±0.486 | -5.687±0.578 | 2.70E-04 |
| cg26884154 | 19 | 7702224  | GeneBody/1st intron       | STXBP2    | -3.732±0.254 | -3.964±0.401 | 5.71E-04 |
| cg09799873 | 19 | 8385500  | GeneBody                  | NDUFA7    | -2.877±0.364 | -3.133±0.458 | 3.85E-03 |
| cg02505409 | 19 | 8429160  | GeneBody/5'UTR/1st exon   | ANGPTL4   | -4.509±0.444 | -4.877±0.804 | 3.06E-03 |
| cg17043366 | 19 | 8578907  | GeneBody/1st intron       | ZNF414    | -5.412±0.442 | -5.735±0.546 | 2.64E-03 |
| cg13727946 | 19 | 8953473  | GeneBody/1st exon         | MBD3L1    | -2.013±0.46  | -2.346±0.53  | 2.37E-03 |
| cg05357320 | 19 | 9251080  | GeneBody/5'UTR/1st exon   | ZNF317    | -5.106±0.494 | -5.477±0.544 | 1.48E-03 |
| cg07306197 | 19 | 9546377  | TSS200                    | ZNF266    | -5.683±0.453 | -6.302±0.698 | 7.48E-07 |
| cg27611665 | 19 | 9929320  | GeneBody/1st intron       | FBXL12    | -5.395±0.397 | -5.91±0.681  | 4.28E-06 |
| cg24911803 | 19 | 10230727 | TSS200                    | EIF3G     | -4.001±0.319 | -4.24±0.312  | 1.16E-03 |
| cg06716436 | 19 | 10342240 | TSS1500                   | S1PR2     | -4.709±0.393 | -5.097±0.592 | 1.59E-04 |
| cg04912278 | 19 | 10362688 | GeneBody/5'UTR/1st exon   | MRPL4     | -4.883±0.579 | -5.259±0.678 | 6.43E-03 |
| cg22874046 | 19 | 10381763 | GeneBody/5'UTR/1st exon   | ICAM1     | -5.861±0.462 | -6.343±0.523 | 2.23E-05 |
| cg08607082 | 19 | 10381924 | GeneBody/1st intron       | ICAM1     | -4.502±0.49  | -4.861±0.523 | 1.78E-03 |
| cg02764611 | 19 | 10426516 | GeneBody/1st intron       | FDX1L     | -5.122±0.405 | -5.446±0.536 | 1.26E-03 |
| cg08896629 | 19 | 10491577 | TSS1500                   | TYK2      | -4.263±0.389 | -4.576±0.583 | 1.86E-03 |
| cg01522721 | 19 | 10514734 | TSS1500                   | CDC37     | -4.744±0.397 | -5.167±0.567 | 3.90E-05 |
| cg11820497 | 19 | 10654946 | GeneBody/1st exon         | ATG4D     | -4.363±0.38  | -4.745±0.453 | 4.53E-05 |
| cg07685221 | 19 | 10812325 | GeneBody/1st exon         | QTRT1     | -4.28±0.38   | -4.572±0.466 | 1.52E-03 |
| cg08207256 | 19 | 10828848 | GeneBody/5'UTR/1st exon   | DNM2      | -2.313±0.377 | -1.964±0.489 | 2.01E-04 |
| cg10948777 | 19 | 10828972 | TSS200                    | MIR638    | -5.248±0.362 | -5.622±0.549 | 8.71E-05 |
| cg15392792 | 19 | 10829173 | GeneBody/1st exon         | MIR638    | -4.072±0.367 | -4.378±0.586 | 1.63E-03 |
| cg05051316 | 19 | 10946973 | GeneBody/5'UTR/1st exon   | TMED1     | -5.712±0.42  | -6.012±0.544 | 3.63E-03 |
| cg12317676 | 19 | 10981810 | TSS1500                   | CARM1     | -4.854±0.379 | -5.107±0.416 | 4.47E-03 |
| cg02077793 | 19 | 10983098 | GeneBody/1st intron       | CARM1     | -3.061±0.671 | -3.744±0.666 | 2.36E-05 |
| cg24352736 | 19 | 11040012 | GeneBody                  | C19orf52  | -5.136±0.37  | -5.521±0.567 | 8.50E-05 |
| cg17747332 | 19 | 11071239 | TSS1500                   | SMARCA4   | -4.205±0.341 | -4.456±0.568 | 6.40E-03 |
| cg12411068 | 19 | 11072235 | GeneBody/5'UTR/1st intron | SMARCA4   | -5.141±0.475 | -5.616±0.635 | 7.70E-05 |
| cg05554936 | 19 | 11450261 | GeneBody/5'UTR/1st exon   | RAB3D     | -5.287±0.544 | -5.809±0.694 | 1.17E-04 |
| cg12754733 | 19 | 11485436 | GeneBody/1st exon         | SWSAP1    | -4.514±0.253 | -4.776±0.405 | 1.16E-04 |
| cg00598858 | 19 | 11545966 | GeneBody/5'UTR/1st exon   | CCDC151   | -5.095±0.446 | -5.41±0.537  | 3.33E-03 |
| cg21584983 | 19 | 11640070 | TSS200                    | ECSIT     | -4.724±0.351 | -5.084±0.524 | 8.71E-05 |
| cg18997662 | 19 | 11877947 | GeneBody/5'UTR/1st exon   | ZNF441    | -4.762±0.705 | -5.25±0.409  | 1.44E-03 |
| cg00733682 | 19 | 12405568 | GeneBody/5'UTR/1st exon   | ZNF44     | -5.545±0.576 | -5.949±0.632 | 2.86E-03 |
| cg19191883 | 19 | 12780323 | GeneBody/5'UTR/1st exon   | WDR83OS   | -4.566±0.384 | -4.915±0.487 | 2.43E-04 |
| cg17742874 | 19 | 12792761 | TSS200                    | DHPS      | -5.117±0.443 | -5.47±0.473  | 7.41E-04 |
| cg05868316 | 19 | 12807494 | TSS200                    | FBXW9     | -6.398±0.638 | -6.89±0.786  | 1.51E-03 |
| cg07799434 | 19 | 12845367 | GeneBody/1st exon         | C19orf43  | -3.769±0.472 | -4.108±0.668 | 4.47E-03 |
| cg02914419 | 19 | 12848364 | GeneBody/1st exon         | ASNA1     | -4.095±0.299 | -4.447±0.394 | 5.03E-06 |
| cg03860466 | 19 | 12912941 | TSS1500                   | PRDX2     | -4.895±0.514 | -5.26±0.403  | 1.47E-03 |
| cg20966551 | 19 | 12949060 | TSS200                    | MAST1     | -4.722±0.395 | -5.058±0.709 | 2.28E-03 |
| cg15341340 | 19 | 12992237 | GeneBody/5'UTR/1st exon   | DNASE2    | -4.414±0.353 | -4.628±0.237 | 5.29E-03 |
| cg19721215 | 19 | 13001564 | TSS1500                   | GCDH      | -4.714±0.297 | -5.002±0.449 | 2.08E-04 |
| cg03140096 | 19 | 13044717 | TSS200                    | FARSA     | -5.249±0.528 | -5.616±0.353 | 1.52E-03 |
| cg11228872 | 19 | 13049259 | TSS200                    | CALR      | -4.7±0.369   | -5.126±0.506 | 8.78E-06 |
| cg03135127 | 19 | 13227421 | GeneBody/5'UTR/1st exon   | TRMT1     | -3.615±0.41  | -3.917±0.423 | 1.54E-03 |
| cg20084646 | 19 | 13885320 | GeneBody/1st exon         | C19orf53  | -6.108±0.626 | -6.476±0.557 | 8.81E-03 |
| cg03430067 | 19 | 14016927 | TSS200                    | C19orf57  | -2.711±0.378 | -2.373±0.444 | 2.32E-04 |
| cg12116020 | 19 | 14228622 | TSS200                    | PRKACA    | -3.977±0.3   | -4.189±0.484 | 7.71E-03 |
| cg12937807 | 19 | 14318115 | TSS1500                   | LPHN1     | -4.659±0.523 | -5.082±0.753 | 1.49E-03 |
| cg13150596 | 19 | 14606390 | GeneBody/5'UTR/1st intron | GIPC1     | -3.529±0.439 | -3.888±0.473 | 5.37E-04 |
| cg12846938 | 19 | 14640140 | TSS1500                   | MIR639    | -3.096±0.492 | -3.456±0.839 | 7.10E-03 |

|            |    |          |                           |              |              |              |          |
|------------|----|----------|---------------------------|--------------|--------------|--------------|----------|
| cg00401678 | 19 | 14787227 | TSS1500                   | EMR3         | -0.507±0.467 | -0.846±0.446 | 1.59E-03 |
| cg23824815 | 19 | 14800772 | TSS200                    | ZNF333       | -4.112±0.356 | -4.407±0.645 | 3.07E-03 |
| cg24102360 | 19 | 14801145 | GeneBody/5'UTR/1st intron | ZNF333       | -4.337±0.367 | -4.675±0.583 | 5.18E-04 |
| cg05112299 | 19 | 14991491 | GeneBody/1st exon         | OR7A17       | -0.291±0.353 | -0.571±0.51  | 1.85E-03 |
| cg01999333 | 19 | 15162623 | GeneBody/5'UTR/1st intron | CASP14       | 0.453±0.695  | -0.072±0.716 | 1.20E-03 |
| cg16763895 | 19 | 15235973 | GeneBody/5'UTR/1st intron | ILVBL        | -4.296±0.392 | -4.688±0.708 | 3.75E-04 |
| cg06650786 | 19 | 15312129 | TSS1500                   | NOTCH3       | -1.401±0.549 | -1.745±0.551 | 6.57E-03 |
| cg21336547 | 19 | 15490553 | GeneBody/5'UTR/1st exon   | AKAP8        | -5.428±0.572 | -5.962±0.727 | 1.66E-04 |
| cg25843439 | 19 | 15852574 | GeneBody/1st exon         | OR10H3       | -0.263±0.583 | -0.738±0.755 | 9.70E-04 |
| cg06816063 | 19 | 16222510 | GeneBody/5'UTR/1st exon   | RAB8A        | -5.253±0.476 | -5.556±0.452 | 5.30E-03 |
| cg23919568 | 19 | 16296265 | GeneBody/1st exon         | FAM32A       | -4.054±0.366 | -4.379±0.476 | 3.50E-04 |
| cg23476955 | 19 | 16308634 | TSS200                    | AP1M1        | -4.91±0.453  | -5.185±0.468 | 8.63E-03 |
| cg17847607 | 19 | 16606955 | GeneBody/5'UTR/1st exon   | CALR3        | -4.926±0.304 | -5.14±0.34   | 2.94E-03 |
| cg05197908 | 19 | 16653599 | TSS1500                   | CHERP        | -3.657±0.469 | -4.047±0.531 | 5.11E-04 |
| cg08553339 | 19 | 16738737 | GeneBody/1st exon         | MED26        | -5.576±0.597 | -6.151±0.672 | 7.20E-05 |
| cg24459023 | 19 | 16739945 | TSS1500                   | MED26        | -4.568±0.424 | -4.845±0.504 | 6.34E-03 |
| cg08891270 | 19 | 17326119 | TSS200                    | USE1         | -5.346±0.696 | -5.756±0.647 | 9.19E-03 |
| cg25713309 | 19 | 17337319 | GeneBody/1st intron       | OCEL1        | -5.792±0.496 | -6.14±0.651  | 4.44E-03 |
| cg22734480 | 19 | 17414346 | TSS200                    | ABHD8        | -4.708±0.327 | -5.062±0.518 | 5.34E-05 |
| cg19390148 | 19 | 17420389 | GeneBody/5'UTR/1st exon   | DDA1         | -4.747±0.413 | -5.114±0.701 | 1.11E-03 |
| cg10262425 | 19 | 17622362 | TSS200                    | PGLS         | -3.761±0.49  | -3.277±0.498 | 3.85E-05 |
| cg07374145 | 19 | 18111823 | TSS200                    | ARRDC2       | -5.936±0.415 | -6.246±0.51  | 2.03E-03 |
| cg23548920 | 19 | 18112433 | GeneBody/1st intron       | ARRDC2       | -5.221±0.392 | -5.476±0.455 | 6.12E-03 |
| cg13179983 | 19 | 18264162 | GeneBody/5'UTR/1st intron | PIK3R2       | -5.279±0.725 | -5.815±0.728 | 1.43E-03 |
| cg04096365 | 19 | 18284450 | TSS200                    | IFI30        | -4.332±0.409 | -4.699±0.44  | 1.76E-04 |
| cg01533387 | 19 | 18284728 | GeneBody/1st exon         | IFI30        | -5.147±0.409 | -5.629±0.469 | 2.94E-06 |
| cg09251995 | 19 | 18392994 | TSS1500                   | JUND         | -5.943±0.596 | -6.403±0.611 | 9.54E-04 |
| cg15085805 | 19 | 18433592 | GeneBody/1st intron       | LSM4         | -4.501±0.568 | -4.871±0.445 | 3.32E-03 |
| cg09529667 | 19 | 18531111 | GeneBody/1st intron       | SSBP4        | -4.478±0.448 | -4.798±0.396 | 1.64E-03 |
| cg02344201 | 19 | 18632488 | GeneBody/1st intron       | ELL          | -4.625±0.382 | -4.868±0.357 | 5.02E-03 |
| cg17843759 | 19 | 18633053 | TSS200                    | ELL          | -5.077±0.542 | -5.529±0.64  | 5.51E-04 |
| cg24873414 | 19 | 18746981 | TSS1500                   | KLHL26       | -3.497±0.463 | -3.873±0.7   | 1.75E-03 |
| cg12558519 | 19 | 18748017 | GeneBody/1st intron       | KLHL26       | -4.311±0.338 | -4.676±0.468 | 2.89E-05 |
| cg10573763 | 19 | 19030094 | GeneBody/1st exon         | COPE         | -5.242±0.408 | -5.683±0.656 | 6.20E-05 |
| cg25234963 | 19 | 19143846 | GeneBody/5'UTR/1st intron | SUGP2        | -4.355±0.353 | -4.64±0.391  | 6.67E-04 |
| cg08393006 | 19 | 19144964 | GeneBody/5'UTR/1st intron | ARMC6        | -3.938±0.412 | -4.241±0.587 | 3.74E-03 |
| cg20426860 | 19 | 19248839 | GeneBody/1st intron       | TMEM161A     | -1.838±0.574 | -1.422±0.701 | 2.70E-03 |
| cg07919162 | 19 | 19431259 | GeneBody/1st intron       | SUGP1        | -4.594±0.378 | -4.856±0.366 | 2.61E-03 |
| cg09535168 | 19 | 19431582 | TSS200                    | MAU2         | -4.591±0.333 | -4.801±0.379 | 7.70E-03 |
| cg14773282 | 19 | 19754574 | TSS200                    | GMIP         | -5.298±0.578 | -5.832±0.615 | 1.14E-04 |
| cg13714039 | 19 | 19843912 | GeneBody/5'UTR/1st exon   | ZNF14        | -5.273±0.443 | -5.689±0.642 | 2.65E-04 |
| cg19282452 | 19 | 19855831 | 0                         | 0            | 0.756±0.442  | 0.394±0.641  | 1.36E-03 |
| cg21029904 | 19 | 23577714 | GeneBody/1st intron       | ZNF91        | -4.552±0.547 | -4.957±0.562 | 1.48E-03 |
| cg00815440 | 19 | 29704028 | GeneBody/5'UTR/1st exon   | UQCRRF51     | -6.546±0.609 | -7.014±0.707 | 1.33E-03 |
| cg18680834 | 19 | 30863349 | GeneBody/5'UTR/1st exon   | ZNF536       | -0.97±0.547  | -1.361±0.815 | 5.62E-03 |
| cg03555203 | 19 | 31770188 | GeneBody                  | TSHZ3        | 3.965±0.491  | 3.594±0.764  | 3.90E-03 |
| cg08458170 | 19 | 31770476 | GeneBody                  | TSHZ3        | 3.119±0.782  | 2.384±1.082  | 2.15E-04 |
| cg22892237 | 19 | 32895911 | GeneBody/1st exon         | LOC400684    | -4.304±0.334 | -4.672±0.433 | 1.51E-05 |
| cg20149493 | 19 | 33071876 | TSS1500                   | PDCD5        | -4.832±0.418 | -5.117±0.311 | 2.03E-03 |
| cg16174234 | 19 | 33463305 | GeneBody/5'UTR/1st intron | C19orf40     | -4.567±0.524 | -5.023±0.653 | 3.88E-04 |
| cg18084798 | 19 | 33555255 | GeneBody/1st intron       | RHPN2        | -4.073±0.423 | -4.421±0.574 | 9.74E-04 |
| cg26149738 | 19 | 34287125 | TSS1500                   | KCTD15       | -2.787±0.533 | -3.155±0.568 | 3.10E-03 |
| cg13846796 | 19 | 34663000 | TSS1500                   | LSM14A       | -5.155±0.448 | -5.594±0.621 | 1.22E-04 |
| cg22096513 | 19 | 34919002 | TSS1500                   | UBA2         | -3.944±0.367 | -4.231±0.427 | 1.12E-03 |
| cg02017041 | 19 | 35521054 | TSS1500                   | SCN1B        | -2.879±0.488 | -3.199±0.532 | 5.18E-03 |
| cg11840540 | 19 | 35644996 | TSS1500                   | FXYD5        | -4.683±0.6   | -5.07±0.617  | 5.34E-03 |
| cg15185001 | 19 | 35739448 | TSS200                    | LSR          | -4.413±0.322 | -4.701±0.363 | 1.97E-04 |
| cg02915261 | 19 | 35739762 | GeneBody/5'UTR/1st exon   | LSR          | -4.84±0.326  | -5.277±0.475 | 7.54E-07 |
| cg09404256 | 19 | 35759233 | TSS1500                   | USF2         | -3.911±0.496 | -4.321±0.687 | 1.03E-03 |
| cg19016517 | 19 | 36036881 | GeneBody/1st exon         | LOC100506469 | -3.939±0.322 | -4.193±0.468 | 2.02E-03 |
| cg03560090 | 19 | 36119752 | TSS1500                   | RBM42        | -5.11±0.435  | -5.449±0.317 | 5.00E-04 |
| cg12680071 | 19 | 36139062 | TSS200                    | COX6B1       | -4.305±0.399 | -4.676±0.416 | 9.53E-05 |
| cg22769406 | 19 | 36139594 | GeneBody/5'UTR/1st intron | COX6B1       | -4.892±0.554 | -5.317±0.621 | 1.25E-03 |
| cg25746138 | 19 | 36209626 | GeneBody/1st intron       | KMT2B        | -4.598±0.49  | -4.984±0.631 | 1.34E-03 |
| cg03064400 | 19 | 36235836 | GeneBody                  | U2AF1L4      | -4.441±0.507 | -4.763±0.572 | 7.04E-03 |
| cg04558861 | 19 | 36239412 | GeneBody/5'UTR/1st exon   | LIN37        | -5.223±0.308 | -5.473±0.427 | 1.21E-03 |
| cg23230018 | 19 | 36239588 | GeneBody/5'UTR/1st exon   | LIN37        | -3.72±0.416  | -3.45±0.481  | 6.23E-03 |
| cg02956481 | 19 | 36249454 | GeneBody/1st intron       | C19orf55     | -5.209±0.463 | -5.541±0.422 | 1.63E-03 |
| cg09984370 | 19 | 37178943 | TSS1500                   | ZNF567       | -3.765±0.323 | -4.04±0.43   | 6.40E-04 |
| cg06583518 | 19 | 38085456 | GeneBody/5'UTR/1st intron | ZNF571       | -4.327±0.441 | -4.674±0.676 | 2.54E-03 |
| cg17333479 | 19 | 38086035 | GeneBody/5'UTR/1st intron | ZNF540       | -4.869±0.557 | -5.28±0.675  | 2.23E-03 |
| cg27400772 | 19 | 38715064 | TSS200                    | DPF1         | -2.25±0.518  | -2.608±0.635 | 4.19E-03 |
| cg18996334 | 19 | 38826282 | TSS200                    | CATSPERG     | -4.57±0.35   | -5.026±0.651 | 7.49E-06 |
| cg05294095 | 19 | 38865080 | TSS200                    | PSMD8        | -5.69±0.624  | -6.304±0.633 | 4.01E-05 |
| cg19161333 | 19 | 39110397 | GeneBody/1st intron       | EIF3K        | -4.118±0.366 | -4.431±0.49  | 6.23E-04 |
| cg15377649 | 19 | 39138400 | GeneBody/1st exon         | ACTN4        | -4.534±0.625 | -4.914±0.616 | 7.95E-03 |
| cg03793778 | 19 | 39264720 | TSS1500                   | LGALS7       | 0.873±0.256  | 0.658±0.276  | 3.95E-04 |
| cg02581667 | 19 | 39322242 | GeneBody/1st intron       | ECH1         | -4.761±0.331 | -5.09±0.912  | 5.70E-03 |
| cg21989094 | 19 | 39421295 | TSS200                    | MRPS12       | -5.353±0.341 | -5.598±0.468 | 4.11E-03 |
| cg08914916 | 19 | 39421419 | GeneBody/5'UTR/1st exon   | MRPS12       | -5.933±0.537 | -6.304±0.535 | 2.73E-03 |
| cg11677722 | 19 | 39881393 | GeneBody/1st intron       | PAF1         | -4.856±0.459 | -5.272±0.569 | 2.25E-04 |
| cg03774732 | 19 | 39882194 | GeneBody/1st exon         | MED29        | -5.616±0.41  | -6.032±0.534 | 5.64E-05 |
| cg25543604 | 19 | 40023503 | TSS200                    | EID2B        | -5.64±0.477  | -6.04±0.503  | 3.89E-04 |
| cg04137116 | 19 | 40030727 | GeneBody/5'UTR/1st exon   | EID2         | -4.831±0.308 | -5.124±0.399 | 1.40E-04 |
| cg05955224 | 19 | 40030984 | TSS200                    | EID2         | -3.669±0.487 | -3.972±0.466 | 6.21E-03 |
| cg14074431 | 19 | 40697804 | GeneBody/5'UTR/1st exon   | MAP3K10      | -5.019±0.397 | -5.302±0.408 | 2.17E-03 |
| cg12748926 | 19 | 40854020 | GeneBody/1st intron       | C19orf47     | -4.969±0.368 | -5.354±0.672 | 2.22E-04 |
| cg22905968 | 19 | 40931262 | GeneBody/5'UTR/1st intron | SERTAD1      | -3.794±0.364 | -4.182±0.55  | 5.28E-05 |
| cg21900416 | 19 | 40950172 | GeneBody/5'UTR/1st exon   | SERTAD3      | -5.56±0.549  | -5.903±0.611 | 7.79E-03 |
| cg01881255 | 19 | 40950703 | TSS1500                   | SERTAD3      | -6.131±0.518 | -6.714±0.644 | 8.77E-06 |
| cg09650985 | 19 | 41082689 | TSS200                    | SHKBP1       | -5.364±0.428 | -5.674±0.397 | 1.55E-03 |
| cg13285447 | 19 | 41196734 | TSS200                    | NUMBL        | -4.759±0.621 | -5.15±0.667  | 6.98E-03 |
| cg16477324 | 19 | 41223331 | GeneBody/1st exon         | ITPKC        | -4.355±0.439 | -4.619±0.343 | 6.46E-03 |
| cg24958765 | 19 | 41283667 | TSS1500                   | RAB4B        | -4.774±0.609 | -5.163±0.563 | 4.87E-03 |
| cg22499964 | 19 | 41304369 | TSS1500                   | EGLN2        | -4.469±0.495 | -4.831±0.574 | 2.15E-03 |

|            |    |          |                           |          |              |              |          |
|------------|----|----------|---------------------------|----------|--------------|--------------|----------|
| cg17914753 | 19 | 41699364 | GeneBody/1st intron       | CYP2S1   | -3.634±0.403 | -3.919±0.594 | 5.74E-03 |
| cg20301340 | 19 | 41815941 | TSS200                    | CCDC97   | -5.015±0.389 | -5.278±0.497 | 5.81E-03 |
| cg26897054 | 19 | 42721870 | GeneBody/1st exon         | DEDD2    | -4.014±0.248 | -4.324±0.336 | 1.98E-06 |
| cg04497885 | 19 | 42747008 | TSS1500                   | GSK3A    | -5.173±0.362 | -5.561±0.516 | 3.58E-05 |
| cg18333807 | 19 | 42747018 | TSS1500                   | GSK3A    | -4.391±0.305 | -4.62±0.45   | 3.39E-03 |
| cg02097636 | 19 | 42806344 | GeneBody/5'UTR/1st exon   | PRR19    | -5.82±0.651  | -6.255±0.551 | 2.89E-03 |
| cg18760752 | 19 | 42806870 | GeneBody/5'UTR/1st exon   | PAFAH1B3 | -3.371±0.133 | -3.454±0.138 | 7.39E-03 |
| cg08551633 | 19 | 43099046 | GeneBody/5'UTR/1st exon   | CEACAM8  | -0.081±0.246 | -0.284±0.403 | 2.07E-03 |
| cg07745725 | 19 | 43245860 | TSS1500                   | PSG3     | 0.82±0.61    | 0.289±0.617  | 2.17E-04 |
| cg25839766 | 19 | 43385077 | TSS1500                   | PSG1     | 1.355±0.627  | 0.811±0.768  | 3.86E-04 |
| cg11151665 | 19 | 43421584 | GeneBody/1st intron       | PSG6     | 1.803±0.455  | 1.468±0.646  | 3.70E-03 |
| cg17642353 | 19 | 43423265 | TSS1500                   | PSG6     | 2.513±0.367  | 2.161±0.502  | 1.59E-04 |
| cg25187533 | 19 | 43586787 | GeneBody/5'UTR/1st exon   | PSG2     | -0.022±0.218 | -0.19±0.338  | 3.32E-03 |
| cg23610820 | 19 | 43774921 | TSS1500                   | PSG9     | 1.118±0.223  | 0.906±0.367  | 4.07E-04 |
| cg16664233 | 19 | 44031589 | TSS200                    | ETHE1    | -4.57±0.418  | -4.992±0.564 | 6.78E-05 |
| cg01880404 | 19 | 44079527 | GeneBody/1st intron       | XRCC1    | -4.367±0.416 | -4.686±0.467 | 1.28E-03 |
| cg16648297 | 19 | 44100438 | TSS200                    | ZNF576   | -6.162±0.488 | -6.52±0.488  | 1.52E-03 |
| cg09757277 | 19 | 44529822 | GeneBody/1st intron       | ZNF222   | -3.172±0.537 | -3.664±0.696 | 2.32E-04 |
| cg03747695 | 19 | 44716642 | TSS200                    | ZNF227   | -3.813±0.674 | -4.244±0.617 | 4.77E-03 |
| cg16094954 | 19 | 45251180 | TSS1500                   | BCL3     | -4.055±0.568 | -4.465±0.682 | 2.72E-03 |
| cg21263196 | 19 | 45311997 | TSS1500                   | BCAM     | -4.107±0.6   | -4.501±0.673 | 5.45E-03 |
| cg21549639 | 19 | 45394156 | TSS1500                   | TOMM40   | -4.433±0.431 | -4.771±0.444 | 7.99E-04 |
| cg12266551 | 19 | 45394624 | GeneBody/5'UTR/1st exon   | TOMM40   | -5.195±0.581 | -5.579±0.627 | 4.75E-03 |
| cg11337525 | 19 | 45418417 | GeneBody                  | APOC1    | -4.559±0.426 | -4.828±0.529 | 9.06E-03 |
| cg05411032 | 19 | 45459158 | GeneBody/1st intron       | CLPTM1   | -4.704±0.408 | -4.986±0.445 | 3.30E-03 |
| cg17697457 | 19 | 45582312 | TSS1500                   | GEMIN7   | -5.184±0.36  | -5.536±0.6   | 3.15E-04 |
| cg10073875 | 19 | 45582669 | GeneBody/5'UTR/1st intron | GEMIN7   | -4.687±0.373 | -4.983±0.531 | 1.74E-03 |
| cg03900104 | 19 | 45909124 | TSS1500                   | CD3EAP   | -4.679±0.7   | -5.285±0.862 | 3.97E-04 |
| cg07816442 | 19 | 45909858 | TSS1500                   | PPP1R13L | -5.303±0.528 | -5.754±0.55  | 2.97E-04 |
| cg04845144 | 19 | 45999799 | GeneBody/1st intron       | RTN2     | -4.803±0.366 | -5.083±0.709 | 8.11E-03 |
| cg16688911 | 19 | 46010011 | TSS1500                   | VASP     | -5.213±0.327 | -5.517±0.534 | 5.31E-04 |
| cg11639397 | 19 | 46010716 | GeneBody/5'UTR/1st exon   | VASP     | -5.565±0.43  | -5.917±0.523 | 7.34E-04 |
| cg01990304 | 19 | 46088010 | GeneBody/1st exon         | OPA3     | -5.7±0.659   | -6.208±0.621 | 8.00E-04 |
| cg03096975 | 19 | 46142574 | GeneBody/1st intron       | EML2     | -5.43±0.542  | -5.784±0.605 | 5.67E-03 |
| cg03879902 | 19 | 46171872 | GeneBody/5'UTR/1st intron | GIPR     | -3.848±0.355 | -4.173±0.434 | 1.98E-04 |
| cg04032871 | 19 | 46195965 | GeneBody/1st exon         | QPCTL    | -4.879±0.391 | -5.282±0.543 | 5.89E-05 |
| cg24254206 | 19 | 46196934 | GeneBody                  | QPCTL    | -1.729±0.476 | -2.04±0.519  | 4.52E-03 |
| cg11063988 | 19 | 46272660 | TSS200                    | SIX5     | -6.217±0.493 | -6.551±0.526 | 3.67E-03 |
| cg05477027 | 19 | 46295590 | GeneBody/1st exon         | DMWD     | -4.592±0.373 | -4.852±0.477 | 4.32E-03 |
| cg16788436 | 19 | 47421960 | GeneBody/1st exon         | ARHGAP35 | 3.454±0.261  | 3.641±0.276  | 2.15E-03 |
| cg26502594 | 19 | 47759476 | TSS1500                   | CCDC9    | -3.834±0.336 | -4.154±0.418 | 1.21E-04 |
| cg00960702 | 19 | 47759791 | GeneBody/5'UTR/1st exon   | CCDC9    | -4.963±0.474 | -5.27±0.481  | 5.04E-03 |
| cg19124998 | 19 | 48248730 | TSS200                    | GLTSCR2  | -4.246±0.453 | -4.654±0.698 | 5.72E-04 |
| cg08981777 | 19 | 48497737 | TSS200                    | ELSPBP1  | -0.455±0.61  | -0.84±0.773  | 9.63E-03 |
| cg06730468 | 19 | 48867056 | GeneBody/1st intron       | TMEM143  | -3.113±0.17  | -3.272±0.233 | 2.16E-04 |
| cg18263177 | 19 | 48867205 | TSS200                    | TMEM143  | -4.653±0.397 | -4.996±0.655 | 1.33E-03 |
| cg01493303 | 19 | 48949047 | GeneBody/5'UTR/1st exon   | GRWD1    | -5.025±0.655 | -5.615±0.79  | 2.28E-04 |
| cg20053799 | 19 | 48972338 | TSS200                    | CYTH2    | -5.131±0.317 | -5.427±0.348 | 1.07E-04 |
| cg02239082 | 19 | 48972844 | GeneBody/1st intron       | CYTH2    | -6.246±0.581 | -6.677±0.602 | 1.48E-03 |
| cg01656853 | 19 | 49199172 | TSS200                    | FUT2     | -1.07±0.341  | -1.296±0.453 | 7.29E-03 |
| cg05951993 | 19 | 49496864 | TSS1500                   | GY1      | -4.729±0.278 | -4.919±0.378 | 6.24E-03 |
| cg01377911 | 19 | 49568036 | TSS1500                   | NTF4     | -2.019±0.42  | -2.308±0.519 | 4.55E-03 |
| cg05484920 | 19 | 49588520 | GeneBody/5'UTR/1st exon   | SNRNP70  | -4.307±0.184 | -4.452±0.225 | 1.12E-03 |
| cg00430945 | 19 | 49617309 | TSS1500                   | LIN7B    | -3.435±0.249 | -3.684±0.354 | 1.01E-04 |
| cg25261908 | 19 | 49660986 | TSS200                    | TRPM4    | -3.753±0.327 | -3.988±0.466 | 4.48E-03 |
| cg13278334 | 19 | 49954994 | GeneBody/5'UTR/1st exon   | PIH1D1   | -3.729±0.277 | -4.001±0.332 | 6.42E-05 |
| cg25658980 | 19 | 49955004 | GeneBody/5'UTR/1st exon   | PIH1D1   | -4.441±0.543 | -4.812±0.556 | 3.22E-03 |
| cg08261177 | 19 | 49956824 | GeneBody/1st intron       | ALDH16A1 | -4.891±0.417 | -5.161±0.538 | 8.37E-03 |
| cg01667384 | 19 | 49977266 | TSS200                    | FLT3LG   | -5.381±0.38  | -5.628±0.42  | 5.78E-03 |
| cg22660544 | 19 | 49999765 | GeneBody/1st intron       | RPS11    | -4.942±0.55  | -5.338±0.719 | 3.51E-03 |
| cg14364739 | 19 | 50083632 | GeneBody/5'UTR/1st intron | NOSIP    | -5.267±0.335 | -5.534±0.341 | 6.32E-04 |
| cg17383958 | 19 | 50143224 | GeneBody/1st exon         | RRAS     | -4.51±0.512  | -4.84±0.464  | 4.36E-03 |
| cg09712606 | 19 | 50169182 | TSS200                    | IRF3     | -4.742±0.427 | -5.102±0.514 | 5.24E-04 |
| cg14576628 | 19 | 50180360 | TSS200                    | PRMT1    | -4.303±0.506 | -4.79±0.711  | 1.74E-04 |
| cg25595446 | 19 | 50180579 | GeneBody/1st intron       | PRMT1    | -4.846±0.709 | -5.325±0.731 | 3.52E-03 |
| cg02784848 | 19 | 50316878 | TSS1500                   | FUZ      | -3.547±0.456 | -3.858±0.607 | 5.85E-03 |
| cg15398448 | 19 | 50353971 | TSS1500                   | PTOV1    | -5.513±0.475 | -5.977±0.541 | 6.26E-05 |
| cg09842540 | 19 | 50381045 | GeneBody/1st intron       | TBC1D17  | -5.341±0.667 | -5.801±0.513 | 1.91E-03 |
| cg17177829 | 19 | 50432927 | GeneBody/5'UTR/1st exon   | NUP62    | -4.628±0.295 | -4.987±0.485 | 9.58E-06 |
| cg00336605 | 19 | 50879437 | TSS1500                   | NR1H2    | -4.004±0.574 | -4.384±0.635 | 4.86E-03 |
| cg19063397 | 19 | 50887127 | TSS1500                   | POLD1    | -2.774±0.515 | -3.207±0.514 | 3.36E-04 |
| cg15560112 | 19 | 50935305 | TSS1500                   | MYBPC2   | -4.885±0.564 | -5.408±0.513 | 7.33E-05 |
| cg09123444 | 19 | 51307950 | GeneBody/5'UTR/1st exon   | C19orf48 | -4.804±0.798 | -5.26±0.496  | 7.97E-03 |
| cg26149550 | 19 | 51334496 | GeneBody/1st intron       | KLK15    | 1.289±0.563  | 0.768±0.721  | 2.01E-04 |
| cg17687962 | 19 | 51358244 | GeneBody/1st exon         | KLK3     | 0.496±0.425  | 0.174±0.602  | 2.74E-03 |
| cg07947016 | 19 | 51375893 | TSS1500                   | KLK2     | -0.288±0.677 | -0.732±0.838 | 6.77E-03 |
| cg04349727 | 19 | 51457389 | TSS1500                   | KLK5     | 0.417±0.582  | -0.089±0.786 | 5.24E-04 |
| cg06258834 | 19 | 51487136 | TSS200                    | KLK7     | -0.743±0.647 | -1.131±0.593 | 7.91E-03 |
| cg15792367 | 19 | 51531484 | TSS200                    | KLK11    | 0.341±0.446  | 0.059±0.571  | 9.56E-03 |
| cg12683641 | 19 | 51587102 | GeneBody/5'UTR/1st intron | KLK14    | 3.224±0.569  | 2.841±0.706  | 5.41E-03 |
| cg04322978 | 19 | 51869401 | GeneBody/1st intron       | ETFB     | -4.701±0.425 | -5.005±0.643 | 5.71E-03 |
| cg12530021 | 19 | 52004630 | GeneBody/1st exon         | SIGLEC12 | -0.346±0.602 | -0.826±0.717 | 9.42E-04 |
| cg15811427 | 19 | 52254222 | GeneBody/5'UTR/1st intron | FPR1     | 0.003±0.569  | -0.53±0.688  | 1.66E-04 |
| cg05376954 | 19 | 52255673 | TSS1500                   | FPR1     | -0.772±0.474 | -1.135±0.584 | 1.65E-03 |
| cg06491924 | 19 | 52430334 | TSS1500                   | ZNF613   | -4.797±0.587 | -5.195±0.873 | 8.46E-03 |
| cg11957040 | 19 | 52693370 | GeneBody/1st exon         | PPP2R1A  | -4.866±0.34  | -5.116±0.586 | 7.11E-03 |
| cg13650689 | 19 | 54618596 | TSS200                    | PRPF31   | -5.892±0.425 | -6.193±0.552 | 3.91E-03 |
| cg21700070 | 19 | 54641527 | GeneBody/5'UTR/1st exon   | CNOT3    | -5.274±0.544 | -5.667±0.598 | 2.20E-03 |
| cg08504905 | 19 | 54663436 | GeneBody/5'UTR/1st exon   | LENG1    | -5.09±0.273  | -5.355±0.419 | 2.17E-04 |
| cg05248470 | 19 | 54785348 | TSS1500                   | LILRB2   | 0.217±0.654  | -0.278±0.65  | 1.10E-03 |
| cg00705255 | 19 | 54804613 | TSS1500                   | LILRA3   | -1.372±0.458 | -1.759±0.607 | 7.01E-04 |
| cg06392096 | 19 | 54824275 | GeneBody/1st intron       | LILRA5   | -1.072±0.356 | -1.347±0.422 | 1.34E-03 |
| cg20542190 | 19 | 54850619 | TSS200                    | LILRA4   | -1.024±0.47  | -1.436±0.606 | 3.99E-04 |
| cg03602500 | 19 | 55047721 | GeneBody                  | KIR3DX1  | 1.534±0.837  | 0.939±0.878  | 2.31E-03 |
| cg25033144 | 19 | 55048290 | GeneBody                  | KIR3DX1  | 2.148±0.773  | 1.492±1.022  | 6.51E-04 |

|            |    |          |                           |           |              |              |          |
|------------|----|----------|---------------------------|-----------|--------------|--------------|----------|
| cg11237817 | 19 | 55235762 | TSS1500                   | KIR3DL3   | 0.747±0.438  | 0.421±0.74   | 6.04E-03 |
| cg22039846 | 19 | 55281253 | TSS200                    | KIR2DL1   | 2.062±0.616  | 1.597±0.77   | 1.95E-03 |
| cg18221897 | 19 | 55282146 | GeneBody/1st intron       | KIR2DL1   | 1.181±0.443  | 0.9±0.554    | 8.86E-03 |
| cg15627025 | 19 | 55327906 | GeneBody/5'UTR/1st exon   | KIR3DL1   | 1.901±0.556  | 1.423±0.758  | 6.13E-04 |
| cg24654350 | 19 | 55328867 | GeneBody/1st intron       | KIR3DL1   | 1.018±0.522  | 0.543±0.723  | 3.37E-04 |
| cg02207610 | 19 | 55628570 | GeneBody/1st intron       | PPP1R12C  | -3.633±0.4   | -4.028±0.468 | 5.88E-05 |
| cg26456957 | 19 | 55629363 | TSS1500                   | PPP1R12C  | -4.574±0.39  | -4.889±0.493 | 9.63E-04 |
| cg04960951 | 19 | 55851040 | TSS200                    | SUV420H2  | -4.891±0.495 | -5.297±0.551 | 5.74E-04 |
| cg17387916 | 19 | 55896965 | TSS1500                   | RPL28     | -4.862±0.639 | -5.249±0.608 | 7.75E-03 |
| cg13336167 | 19 | 56092141 | GeneBody/5'UTR/1st intron | ZNF579    | -5.072±0.518 | -5.41±0.548  | 5.11E-03 |
| cg11951066 | 19 | 56109941 | GeneBody/5'UTR/1st intron | FIZ1      | 3.071±0.497  | 3.506±0.531  | 2.32E-04 |
| cg12531003 | 19 | 56152621 | GeneBody/5'UTR/1st intron | ZNF580    | -4.756±0.575 | -5.126±0.63  | 6.12E-03 |
| cg08568987 | 19 | 56165234 | TSS200                    | U2AF2     | -4.573±0.287 | -4.887±0.408 | 2.60E-05 |
| cg08475088 | 19 | 56249291 | GeneBody/1st intron       | NLRP9     | 2.335±0.81   | 1.649±1.019  | 5.60E-04 |
| cg22190114 | 19 | 56459234 | GeneBody/5'UTR/1st exon   | NLRP8     | 2.299±0.851  | 1.646±1.052  | 1.58E-03 |
| cg18473162 | 19 | 56631888 | GeneBody/5'UTR/1st intron | ZNF787    | -5.257±0.344 | -5.521±0.539 | 3.49E-03 |
| cg09837943 | 19 | 57306631 | GeneBody                  | ZIM2      | 0.615±0.433  | 0.243±0.645  | 8.85E-04 |
| cg06244906 | 19 | 57307081 | GeneBody                  | ZIM2      | 0.707±0.577  | 0.163±0.793  | 2.07E-04 |
| cg19098268 | 19 | 57352269 | GeneBody/1st exon         | MIMT1     | 1.424±0.438  | 1.719±0.524  | 5.06E-03 |
| cg22307908 | 19 | 57702927 | GeneBody/5'UTR/1st exon   | ZNF264    | -5.139±0.458 | -5.42±0.51   | 9.09E-03 |
| cg11140785 | 19 | 57703301 | GeneBody/1st exon         | ZNF264    | -5.065±0.341 | -5.366±0.756 | 4.67E-03 |
| cg25549230 | 19 | 57791887 | GeneBody/5'UTR/1st exon   | ZNF460    | -5.318±0.343 | -5.852±0.68  | 3.85E-07 |
| cg16518291 | 19 | 57792257 | GeneBody/1st intron       | ZNF460    | -4.805±0.475 | -5.12±0.539  | 5.13E-03 |
| cg27276456 | 19 | 58180770 | GeneBody/5'UTR/1st intron | ZSCAN4    | 3.461±0.49   | 3.132±0.688  | 7.68E-03 |
| cg17560327 | 19 | 58427757 | GeneBody/1st exon         | ZNF417    | -5.008±0.501 | -5.311±0.489 | 8.11E-03 |
| cg10770529 | 19 | 58695164 | GeneBody/5'UTR/1st intron | ZNF274    | -4.566±0.631 | -5.062±0.71  | 9.59E-04 |
| cg27649653 | 19 | 58789751 | TSS1500                   | ZNF8      | -1.666±0.388 | -1.324±0.437 | 2.46E-04 |
| cg22255355 | 19 | 58838374 | TSS200                    | ZSCAN22   | -5.343±0.46  | -5.956±0.697 | 1.10E-06 |
| cg26887625 | 19 | 58874030 | GeneBody/5'UTR/1st intron | ZNF497    | -5.589±0.411 | -6.008±0.628 | 1.07E-04 |
| cg23473726 | 19 | 58978569 | GeneBody/5'UTR/1st intron | ZNF324    | -4.611±0.353 | -4.908±0.541 | 1.28E-03 |
| cg14042128 | 19 | 59066234 | GeneBody/5'UTR/1st exon   | CHMP2A    | -3.788±0.303 | -4.015±0.444 | 3.44E-03 |
| cg17223189 | 19 | 59066601 | TSS200                    | CHMP2A    | -5.481±0.656 | -5.952±0.777 | 2.72E-03 |
| cg10075436 | 19 | 59084928 | GeneBody/5'UTR/1st exon   | MZF1      | -4.718±0.347 | -4.946±0.384 | 5.05E-03 |
| cg11991627 | 20 | 271345   | GeneBody/5'UTR/1st exon   | C20orf96  | -5.196±0.511 | -5.527±0.574 | 6.08E-03 |
| cg07115304 | 20 | 361903   | GeneBody/5'UTR/1st intron | TRIB3     | -3.946±0.38  | -4.186±0.384 | 6.12E-03 |
| cg12113932 | 20 | 388401   | TSS1500                   | RBCK1     | -4.228±0.37  | -4.638±0.483 | 1.41E-05 |
| cg25559100 | 20 | 524528   | TSS200                    | CSNK2A1   | -4.894±0.391 | -5.134±0.43  | 8.75E-03 |
| cg25737664 | 20 | 1538671  | TSS1500                   | SIRPD     | 2.17±0.794   | 1.457±1.111  | 4.00E-04 |
| cg17423978 | 20 | 1539641  | TSS1500                   | SIRPD     | 1.292±0.717  | 0.795±0.904  | 4.41E-03 |
| cg25799433 | 20 | 1600623  | GeneBody/5'UTR/1st exon   | SIRPB1    | -1.419±0.699 | -1.842±0.647 | 7.45E-03 |
| cg11245384 | 20 | 1974646  | TSS1500                   | PDYN      | -0.317±0.501 | -0.742±0.642 | 5.92E-04 |
| cg23080667 | 20 | 2082285  | TSS1500                   | STK35     | -5.217±0.5   | -5.536±0.558 | 6.74E-03 |
| cg07355551 | 20 | 2489285  | GeneBody/5'UTR/1st intron | ZNF343    | -3.756±0.26  | -3.965±0.295 | 7.63E-04 |
| cg26132853 | 20 | 2632587  | TSS1500                   | NOP56     | -5.29±0.483  | -5.652±0.602 | 2.07E-03 |
| cg01292265 | 20 | 2633870  | GeneBody                  | NOP56     | -4.845±0.363 | -5.186±0.408 | 1.02E-04 |
| cg19851137 | 20 | 2645051  | TSS200                    | IDH3B     | -4.293±0.43  | -4.703±0.575 | 1.56E-04 |
| cg07884474 | 20 | 2821816  | GeneBody/5'UTR/1st exon   | PCED1A    | -5.153±0.483 | -5.619±0.578 | 8.70E-05 |
| cg07357256 | 20 | 3027028  | GeneBody                  | MRPS26    | -4.939±0.35  | -5.248±0.64  | 1.65E-03 |
| cg02810773 | 20 | 3190112  | TSS200                    | ITPA      | -5.237±0.372 | -5.737±0.549 | 7.89E-07 |
| cg02990033 | 20 | 3643863  | GeneBody/1st intron       | GFRA4     | 0.157±0.425  | -0.169±0.687 | 3.91E-03 |
| cg14159818 | 20 | 3749519  | TSS1500                   | C20orf27  | -5.41±0.362  | -5.923±0.525 | 2.41E-07 |
| cg24889744 | 20 | 3761916  | GeneBody/1st exon         | SPEF1     | -2.848±0.405 | -3.284±0.592 | 3.80E-05 |
| cg09049660 | 20 | 3869033  | TSS1500                   | PANK2     | -3.733±0.447 | -4.056±0.578 | 3.31E-03 |
| cg16977257 | 20 | 4701595  | TSS1500                   | PRND      | -4.197±0.319 | -4.479±0.425 | 3.93E-04 |
| cg16884569 | 20 | 4803636  | GeneBody/5'UTR/1st intron | RASSF2    | -4.088±0.948 | -4.796±0.882 | 1.11E-03 |
| cg27212099 | 20 | 5093936  | TSS1500                   | TMEM230   | -4.002±0.201 | -4.177±0.217 | 2.63E-04 |
| cg02689825 | 20 | 5107135  | GeneBody/5'UTR/1st intron | PCNA      | -3.862±0.417 | -4.155±0.685 | 8.79E-03 |
| cg04562739 | 20 | 5107446  | GeneBody/5'UTR/1st exon   | CDS2      | -5.735±0.513 | -6.143±0.603 | 9.12E-04 |
| cg17896229 | 20 | 5294595  | GeneBody/1st exon         | PROKR2    | 1.509±0.343  | -1.11E-04    | 1.11E-04 |
| cg05486551 | 20 | 5731259  | GeneBody/5'UTR/1st intron | C20orf196 | -2.419±0.45  | -2.73±0.499  | 4.34E-03 |
| cg27367554 | 20 | 5930982  | GeneBody/1st exon         | TRMT6     | -5.578±0.586 | -5.971±0.65  | 4.40E-03 |
| cg18329036 | 20 | 5987489  | TSS1500                   | CRLS1     | -3.98±0.471  | -4.277±0.488 | 6.45E-03 |
| cg04741821 | 20 | 8000564  | TSS200                    | TMX4      | -4.657±0.492 | -4.998±0.545 | 3.22E-03 |
| cg06289589 | 20 | 10015419 | TSS1500                   | ANKEF1    | -4.731±0.525 | -5.041±0.508 | 9.49E-03 |
| cg24652271 | 20 | 10654705 | TSS200                    | JAG1      | -5.661±0.383 | -5.923±0.412 | 3.41E-03 |
| cg14159894 | 20 | 11872261 | GeneBody/5'UTR/1st intron | BTBD3     | -4.227±0.371 | -4.491±0.571 | 3.60E-03 |
| cg21065990 | 20 | 13619254 | GeneBody/5'UTR/1st intron | TASP1     | -5.568±0.635 | -6.057±0.562 | 7.39E-04 |
| cg03473294 | 20 | 13619704 | TSS200                    | TASP1     | -5.156±0.33  | -5.363±0.393 | 8.77E-03 |
| cg14251536 | 20 | 13765341 | GeneBody/5'UTR/1st intron | ESF1      | -4.082±0.762 | -4.632±0.743 | 1.71E-03 |
| cg23455897 | 20 | 16553861 | GeneBody/1st intron       | KIF16B    | -5.352±0.53  | -5.771±0.517 | 6.38E-04 |
| cg18710985 | 20 | 16554249 | TSS200                    | KIF16B    | -4.697±0.469 | -5.034±0.473 | 1.88E-03 |
| cg00083720 | 20 | 17550917 | GeneBody/1st intron       | DSTN      | -5.42±0.575  | -5.784±0.642 | 7.06E-03 |
| cg02425732 | 20 | 17662212 | GeneBody/5'UTR/1st intron | RRBP1     | -4.635±0.431 | -4.947±0.653 | 5.26E-03 |
| cg20207753 | 20 | 17948278 | GeneBody/1st intron       | SNX5      | -3.035±0.513 | -3.428±0.62  | 1.53E-03 |
| cg06061892 | 20 | 17948694 | GeneBody/1st intron       | SNX5      | -5.063±0.424 | -5.505±0.53  | 3.10E-05 |
| cg09486567 | 20 | 18038510 | GeneBody/5'UTR/1st exon   | OVOL2     | -4.36±0.354  | -4.665±0.575 | 1.26E-03 |
| cg14296147 | 20 | 18118706 | GeneBody/1st intron       | PET117    | -5.535±0.31  | -5.819±0.55  | 9.77E-04 |
| cg14858551 | 20 | 18269244 | GeneBody/5'UTR/1st exon   | ZNF133    | -4.302±0.583 | -4.715±0.759 | 3.94E-03 |
| cg15613982 | 20 | 18488017 | TSS200                    | SEC23B    | -4.459±0.457 | -4.872±0.582 | 2.58E-04 |
| cg04737319 | 20 | 18568568 | GeneBody/5'UTR/1st exon   | DTD1      | -4.654±0.374 | -4.946±0.655 | 4.67E-03 |
| cg20998885 | 20 | 18794833 | GeneBody/1st exon         | SCP2D1    | 2.146±0.437  | 1.662±0.813  | 1.06E-04 |
| cg08699435 | 20 | 19997606 | TSS1500                   | NAA20     | -4.346±0.383 | -4.657±0.51  | 1.12E-03 |
| cg20043466 | 20 | 21106097 | TSS1500                   | PLK1S1    | -3.722±0.393 | -4.059±0.528 | 6.28E-04 |
| cg27394046 | 20 | 21283521 | TSS1500                   | XRN2      | -3.157±0.321 | -3.44±0.441  | 4.80E-04 |
| cg20907471 | 20 | 21679525 | 0                         | 0         | -1.967±0.436 | -2.25±0.535  | 7.22E-03 |
| cg24401441 | 20 | 21679843 | 0                         | 0         | -0.114±0.72  | -0.622±0.762 | 2.53E-03 |
| cg09282338 | 20 | 23330591 | TSS1500                   | NXT1      | -4.493±0.406 | -4.959±0.51  | 6.48E-06 |
| cg08453968 | 20 | 23331934 | GeneBody/5'UTR/1st intron | NXT1      | -5.05±0.365  | -5.35±0.308  | 3.36E-04 |
| cg18456149 | 20 | 23401804 | GeneBody/1st intron       | NAPB      | -4.759±0.617 | -5.237±0.613 | 5.43E-04 |
| cg15210427 | 20 | 23548991 | GeneBody/1st exon         | CST9L     | 0.1±0.626    | -0.284±0.721 | 9.68E-03 |
| cg27655855 | 20 | 23549455 | TSS200                    | CST9L     | 1.542±0.48   | 1.187±0.747  | 4.67E-03 |
| cg08430598 | 20 | 23731367 | GeneBody/1st exon         | CST1      | 2.86±0.544   | 2.474±0.838  | 6.64E-03 |
| cg16208271 | 20 | 25176149 | TSS200                    | ENTPD6    | -4.437±0.289 | -4.638±0.387 | 5.15E-03 |
| cg06269001 | 20 | 25176407 | GeneBody/5'UTR/1st exon   | ENTPD6    | -5.977±0.534 | -6.567±0.611 | 8.99E-06 |
| cg06421707 | 20 | 25228305 | TSS1500                   | PYGB      | -5.386±0.421 | -5.764±0.554 | 3.22E-04 |

|            |    |          |                           |             |              |              |          |
|------------|----|----------|---------------------------|-------------|--------------|--------------|----------|
| cg19434221 | 20 | 25371822 | TSS1500                   | ABHD12      | -4.209±0.489 | -4.54±0.652  | 6.30E-03 |
| cg08093398 | 20 | 25382007 | 0                         | 0           | 1.519±0.511  | 1.191±0.635  | 8.07E-03 |
| cg04871004 | 20 | 25677445 | GeneBody/5'UTR/1st exon   | ZNF337      | -6.023±0.704 | -6.494±0.604 | 2.92E-03 |
| cg03014957 | 20 | 29956062 | TSS1500                   | DEFB118     | 0.187±0.628  | -0.386±0.711 | 1.59E-04 |
| cg20312687 | 20 | 29956585 | GeneBody/1st intron       | DEFB118     | 0.463±0.802  | -0.083±0.948 | 4.46E-03 |
| cg18462653 | 20 | 29978176 | GeneBody/1st intron       | DEFB119     | 0.136±0.808  | -0.471±0.866 | 1.36E-03 |
| cg11850311 | 20 | 30192545 | TSS1500                   | ID1         | -4.234±0.424 | -4.587±0.52  | 6.27E-04 |
| cg03154513 | 20 | 30193400 | GeneBody/1st exon         | ID1         | -4.94±0.317  | -5.147±0.444 | 9.66E-03 |
| cg16137862 | 20 | 30310246 | GeneBody/5'UTR/1st intron | BCL2L1      | -2.893±0.434 | -3.263±0.569 | 5.90E-04 |
| cg00782854 | 20 | 30310858 | TSS1500                   | BCL2L1      | -4.949±0.48  | -5.471±0.521 | 1.01E-05 |
| cg10211877 | 20 | 30539733 | GeneBody/1st exon         | PDRG1       | -5.218±0.459 | -5.531±0.684 | 8.11E-03 |
| cg25811820 | 20 | 30795836 | GeneBody/1st exon         | POFUT1      | -4.218±0.24  | -4.506±0.358 | 6.99E-06 |
| cg01951308 | 20 | 30865502 | GeneBody/5'UTR/1st exon   | KIF3B       | -4.749±0.554 | -5.156±0.568 | 1.57E-03 |
| cg10812811 | 20 | 31070849 | GeneBody/5'UTR/1st intron | C20orf112   | -4.924±0.621 | -5.304±0.56  | 6.62E-03 |
| cg26079992 | 20 | 31988906 | GeneBody/5'UTR/1st intron | CDK5RAP1    | -4.874±0.338 | -5.11±0.493  | 6.12E-03 |
| cg27638597 | 20 | 32031303 | GeneBody/1st exon         | SNTA1       | -4.953±0.429 | -5.283±0.641 | 2.92E-03 |
| cg21523528 | 20 | 32077966 | GeneBody/5'UTR/1st exon   | CBFA2T2     | -4.822±0.611 | -5.382±0.71  | 1.62E-04 |
| cg10054127 | 20 | 32262111 | GeneBody/1st exon         | NECAB3      | -6.012±0.504 | -6.465±0.598 | 2.24E-04 |
| cg15056412 | 20 | 32262523 | TSS1500                   | NECAB3      | -3.96±0.636  | -4.381±0.56  | 3.30E-03 |
| cg24088408 | 20 | 32274875 | TSS1500                   | E2F1        | -1.174±0.438 | -0.734±0.602 | 8.32E-05 |
| cg16051027 | 20 | 32320358 | GeneBody/1st intron       | ZNF341      | -4.656±0.309 | -4.916±0.325 | 3.60E-04 |
| cg08428707 | 20 | 32398882 | TSS1500                   | CHMP4B      | -4.848±0.393 | -5.169±0.414 | 5.31E-04 |
| cg02435593 | 20 | 32399369 | GeneBody/1st exon         | CHMP4B      | -1.916±0.297 | -2.227±0.444 | 6.70E-05 |
| cg04025889 | 20 | 32891089 | GeneBody/5'UTR/1st exon   | AHCY        | -4.622±0.304 | -4.868±0.416 | 1.22E-03 |
| cg27262488 | 20 | 32950909 | TSS200                    | ITCH        | -5.574±0.502 | -5.886±0.447 | 5.80E-03 |
| cg23789523 | 20 | 33104204 | GeneBody/5'UTR/1st exon   | DYNLRB1     | -5.788±0.46  | -6.079±0.449 | 5.63E-03 |
| cg01483882 | 20 | 33292450 | GeneBody/5'UTR/1st intron | TP53INP2    | -5.44±0.38   | -6.099±0.659 | 8.82E-09 |
| cg10035303 | 20 | 33680179 | GeneBody/1st intron       | TRPC4AP     | -2.358±0.524 | -1.846±0.612 | 6.61E-05 |
| cg21802726 | 20 | 33735257 | TSS200                    | EDEM2       | -4.308±0.47  | -4.602±0.552 | 8.74E-03 |
| cg27270218 | 20 | 33872806 | TSS200                    | EIF6        | -3.669±0.255 | -3.832±0.305 | 7.74E-03 |
| cg00350702 | 20 | 34129927 | GeneBody/1st exon         | ERGIC3      | -5.064±0.64  | -5.485±0.632 | 4.24E-03 |
| cg18497960 | 20 | 34253082 | TSS1500                   | RBM12       | -4.517±0.316 | -4.776±0.461 | 1.33E-03 |
| cg24158546 | 20 | 34542777 | TSS1500                   | SCAND1      | -4.477±0.357 | -4.727±0.575 | 8.48E-03 |
| cg11449935 | 20 | 35202477 | GeneBody/5'UTR/1st intron | TGIF2       | -4.479±0.338 | -4.814±0.466 | 1.02E-04 |
| cg19230917 | 20 | 35234226 | GeneBody/5'UTR/1st exon   | C20orf24    | -5.835±0.541 | -6.189±0.554 | 4.68E-03 |
| cg15627502 | 20 | 35806795 | TSS1500                   | RPN2        | -4.215±0.645 | -4.678±0.608 | 1.69E-03 |
| cg13946860 | 20 | 35807510 | GeneBody/5'UTR/1st exon   | RPN2        | -5.992±0.439 | -6.471±0.565 | 1.80E-05 |
| cg07719737 | 20 | 35917850 | TSS200                    | MANBAL      | -4.21±0.49   | -4.542±0.633 | 5.66E-03 |
| cg21449843 | 20 | 35918440 | GeneBody/5'UTR/1st intron | MANBAL      | -4.626±0.382 | -4.904±0.519 | 3.50E-03 |
| cg23594876 | 20 | 36155925 | GeneBody/5'UTR/1st intron | BLCAP       | -4.737±0.357 | -4.98±0.35   | 3.13E-03 |
| cg00495442 | 20 | 37101172 | TSS1500                   | RALGAPB     | -4.011±0.431 | -4.304±0.495 | 4.26E-03 |
| cg09113613 | 20 | 37101903 | GeneBody/5'UTR/1st intron | RALGAPB     | -4.771±0.328 | -4.987±0.287 | 3.49E-03 |
| cg26826852 | 20 | 37377424 | GeneBody/1st exon         | ACTR5       | -4.446±0.377 | -4.919±0.547 | 2.50E-06 |
| cg07955828 | 20 | 37591298 | GeneBody/1st intron       | DHX35       | -4.429±0.341 | -4.724±0.403 | 3.56E-04 |
| cg21545849 | 20 | 40247209 | TSS200                    | CHD6        | -5.347±0.379 | -5.703±0.42  | 9.99E-05 |
| cg07440387 | 20 | 42086266 | TSS1500                   | SRSF6       | -4.343±0.834 | -4.954±0.677 | 1.11E-03 |
| cg03812067 | 20 | 43150641 | GeneBody/5'UTR/1st exon   | SERINC3     | -4.178±0.242 | -4.499±0.382 | 1.60E-06 |
| cg22799917 | 20 | 43514951 | GeneBody/5'UTR/1st intron | YWHAB       | -4.888±0.55  | -5.357±0.564 | 2.98E-04 |
| cg27194614 | 20 | 43594895 | GeneBody/1st exon         | STK4-AS1    | -4.337±0.332 | -4.733±0.489 | 7.12E-06 |
| cg09882647 | 20 | 43991346 | TSS1500                   | SYS1        | -2.943±0.588 | -3.473±0.701 | 2.19E-04 |
| cg05451974 | 20 | 43991922 | GeneBody/1st exon         | SYS1-DBNDD2 | -5.587±0.455 | -6.26±0.757  | 2.38E-07 |
| cg07294870 | 20 | 44044586 | TSS200                    | PIGT        | -4.626±0.515 | -4.97±0.583  | 4.81E-03 |
| cg23134520 | 20 | 44485949 | GeneBody/1st exon         | ACOT8       | -5.149±0.428 | -5.489±0.648 | 2.15E-03 |
| cg23271318 | 20 | 44509620 | TSS1500                   | ZSWIM1      | -3.508±0.399 | -3.796±0.501 | 3.05E-03 |
| cg21762107 | 20 | 44519951 | TSS200                    | NEURL2      | -5.124±0.335 | -5.592±0.541 | 6.33E-07 |
| cg11399590 | 20 | 44564022 | GeneBody/5'UTR/1st intron | PCIF1       | -4.869±0.337 | -5.092±0.289 | 3.13E-03 |
| cg09378691 | 20 | 44600971 | TSS200                    | ZNF335      | -4.775±0.346 | -5.097±0.421 | 1.54E-04 |
| cg20116574 | 20 | 44718168 | GeneBody/5'UTR/1st intron | NCOA5       | -4.072±0.64  | -4.529±0.737 | 2.70E-03 |
| cg04640913 | 20 | 44880515 | GeneBody/5'UTR/1st intron | CDH22       | -0.731±0.442 | -1.009±0.556 | 9.76E-03 |
| cg04506546 | 20 | 44992831 | GeneBody/5'UTR/1st intron | SLC35C2     | -6.281±0.556 | -6.705±0.622 | 1.30E-03 |
| cg14261863 | 20 | 45035638 | TSS1500                   | ELMO2       | -3.72±0.621  | -4.088±0.493 | 7.34E-03 |
| cg23026920 | 20 | 45317919 | GeneBody/1st exon         | TP53RK      | -5.434±0.542 | -5.965±0.566 | 4.63E-05 |
| cg23214267 | 20 | 45523137 | TSS200                    | EYA2        | -3.369±0.758 | -3.903±0.918 | 3.47E-03 |
| cg09345431 | 20 | 47538576 | GeneBody/1st intron       | ARFGEF2     | -5.057±0.462 | -5.377±0.522 | 3.36E-03 |
| cg06838394 | 20 | 47538719 | GeneBody/1st intron       | ARFGEF2     | -3.291±0.192 | -3.488±0.257 | 5.33E-05 |
| cg08162572 | 20 | 47663143 | GeneBody/5'UTR/1st intron | CSE1L       | -5.949±0.449 | -6.429±0.495 | 1.43E-05 |
| cg11326640 | 20 | 47804099 | GeneBody/5'UTR/1st intron | STAU1       | -4.507±0.413 | -4.826±0.62  | 2.81E-03 |
| cg27161973 | 20 | 47835784 | TSS200                    | DDX27       | -4.396±0.385 | -4.688±0.448 | 1.48E-03 |
| cg20150565 | 20 | 47893859 | TSS1500                   | ZFAS1       | -2.828±0.502 | -3.159±0.593 | 7.73E-03 |
| cg24448231 | 20 | 47895529 | GeneBody/1st exon         | SNORD12C    | -4.293±0.523 | -4.639±0.687 | 7.13E-03 |
| cg01924619 | 20 | 48330560 | TSS200                    | B4GALT5     | -6.055±0.614 | -6.51±0.706  | 1.86E-03 |
| cg15488402 | 20 | 48429173 | TSS200                    | SLC9A8      | -3.047±0.417 | -3.364±0.549 | 2.09E-03 |
| cg13310671 | 20 | 48553087 | GeneBody/1st exon         | RNF114      | -5.323±0.368 | -5.948±0.669 | 2.55E-08 |
| cg17371067 | 20 | 48807380 | GeneBody/5'UTR/1st exon   | CEBPB       | -5.624±0.408 | -5.876±0.464 | 9.01E-03 |
| cg15864184 | 20 | 49126874 | GeneBody/5'UTR/1st exon   | PTPN1       | -2.376±0.298 | -2.659±0.353 | 1.05E-04 |
| cg14915263 | 20 | 49127137 | GeneBody/1st intron       | PTPN1       | -5.931±0.555 | -6.495±0.667 | 4.02E-05 |
| cg20028291 | 20 | 49411856 | GeneBody/1st intron       | BCAS4       | -4.793±0.47  | -5.292±0.548 | 1.81E-05 |
| cg10226546 | 20 | 50158996 | GeneBody/1st exon         | NFATC2      | -2.262±0.565 | -2.605±0.578 | 8.41E-03 |
| cg04542415 | 20 | 50808759 | TSS1500                   | ZFP64       | -5.667±0.472 | -5.991±0.516 | 3.51E-03 |
| cg08899632 | 20 | 50809000 | TSS1500                   | ZFP64       | -5.329±0.464 | -5.891±0.705 | 6.69E-06 |
| cg00476577 | 20 | 52200408 | TSS1500                   | ZNF217      | -3.562±0.455 | -4.034±0.544 | 2.88E-05 |
| cg13347296 | 20 | 52825087 | GeneBody/1st intron       | PFDN4       | -4.872±0.399 | -5.237±0.468 | 1.71E-04 |
| cg19226099 | 20 | 54824085 | GeneBody/1st exon         | MC3R        | 0.993±0.537  | 0.604±0.619  | 2.34E-03 |
| cg22732672 | 20 | 54967037 | GeneBody/5'UTR/1st intron | AURKA       | -5.148±0.398 | -5.163±0.39  | 5.16E-03 |
| cg21772838 | 20 | 54967497 | GeneBody/5'UTR/1st exon   | CSTF1       | -6.038±0.386 | -6.375±0.475 | 3.54E-04 |
| cg00831028 | 20 | 55043745 | GeneBody/5'UTR/1st exon   | RTFDC1      | -4.026±0.307 | -4.328±0.371 | 6.80E-05 |
| cg19734148 | 20 | 55926119 | TSS200                    | RAE1        | -5.238±0.397 | -5.581±0.472 | 3.80E-04 |
| cg23137254 | 20 | 55966732 | GeneBody/1st exon         | RBM38       | -5.454±0.433 | -6.004±0.703 | 4.35E-06 |
| cg08783491 | 20 | 57226061 | TSS1500                   | STX16       | -4.295±0.276 | -4.579±0.427 | 1.05E-04 |
| cg08304608 | 20 | 57594200 | TSS200                    | TUBB1       | 2.847±0.221  | 3.055±0.321  | 2.54E-04 |
| cg24457521 | 20 | 57607420 | GeneBody/5'UTR/1st exon   | ATP5E       | -4.645±0.584 | -5.081±0.618 | 1.44E-03 |
| cg11595749 | 20 | 57607571 | TSS200                    | ATP5E       | -5.248±0.645 | -5.644±0.58  | 6.52E-03 |
| cg24738006 | 20 | 60717729 | GeneBody/1st intron       | PSMA7       | -5.405±0.407 | -5.658±0.489 | 9.46E-03 |
| cg15580043 | 20 | 60719730 | GeneBody/1st intron       | SS18L1      | -4.759±0.621 | -5.307±0.656 | 2.09E-04 |
| cg23656380 | 20 | 60877581 | TSS1500                   | ADRM1       | -4.843±0.536 | -5.255±0.549 | 9.19E-04 |

|            |    |          |                           |                   |              |              |          |
|------------|----|----------|---------------------------|-------------------|--------------|--------------|----------|
| cg21459921 | 20 | 60878267 | GeneBody/5'UTR/1st intron | <i>ADRM1</i>      | -4.542±0.575 | -4.964±0.582 | 1.54E-03 |
| cg02603366 | 20 | 60962040 | TSS200                    | <i>RPS21</i>      | -4.886±0.491 | -5.193±0.603 | 9.54E-03 |
| cg03035419 | 20 | 60962318 | GeneBody/5'UTR/1st intron | <i>RPS21</i>      | -6.153±0.504 | -6.533±0.537 | 1.32E-03 |
| cg25826526 | 20 | 61426675 | TSS1500                   | <i>MRGBP</i>      | -4.862±0.379 | -5.17±0.519  | 1.21E-03 |
| cg24999924 | 20 | 61428215 | GeneBody/1st intron       | <i>MRGBP</i>      | -4.146±0.578 | -4.692±0.693 | 1.17E-04 |
| cg11118665 | 20 | 61493341 | TSS1500                   | <i>TCFL5</i>      | -4.972±0.358 | -5.322±0.619 | 3.87E-04 |
| cg18071588 | 20 | 61569198 | GeneBody/5'UTR/1st exon   | <i>DIDO1</i>      | -6.094±0.571 | -6.788±0.667 | 1.83E-06 |
| cg21944757 | 20 | 61904196 | GeneBody/5'UTR/1st exon   | <i>ARFGAP1</i>    | -5.012±0.415 | -5.373±0.439 | 2.51E-04 |
| cg15616083 | 20 | 62104607 | TSS1500                   | <i>KCNQ2</i>      | -0.371±0.546 | -0.79±0.66   | 1.56E-03 |
| cg23352030 | 20 | 62198469 | GeneBody/1st exon         | <i>HELZ2</i>      | 3.681±0.511  | 4.003±0.554  | 7.06E-03 |
| cg00177013 | 20 | 62339100 | GeneBody/5'UTR/1st intron | <i>ARFRP1</i>     | -3.256±0.261 | -3.452±0.268 | 1.26E-03 |
| cg15568167 | 20 | 62610530 | GeneBody/1st intron       | <i>SAMD10</i>     | -5.435±0.538 | -5.971±0.589 | 4.01E-05 |
| cg06255227 | 20 | 62738125 | GeneBody/1st exon         | <i>NPBWR2</i>     | 2.075±0.715  | 1.557±0.978  | 3.76E-03 |
| cg07973461 | 21 | 11098794 | GeneBody/5'UTR/1st exon   | <i>BAGE3</i>      | 2.423±0.598  | 1.726±0.803  | 6.90E-06 |
| cg05674444 | 21 | 14414818 | GeneBody/1st intron       | <i>ANKRD30BP2</i> | -1.791±0.4   | -2.178±0.517 | 1.12E-04 |
| cg00344709 | 21 | 14982225 | TSS1500                   | <i>POTED</i>      | 2.239±0.544  | 1.783±0.785  | 1.03E-03 |
| cg24847572 | 21 | 15755606 | TSS200                    | <i>HSPA13</i>     | -5.706±0.423 | -6.01±0.411  | 1.77E-03 |
| cg02532648 | 21 | 18984770 | GeneBody/5'UTR/1st intron | <i>BTG3</i>       | -4.517±0.635 | -4.966±0.865 | 4.66E-03 |
| cg06076054 | 21 | 19191045 | GeneBody/5'UTR/1st intron | <i>C21orf91</i>   | -4.813±0.357 | -5.086±0.462 | 1.84E-03 |
| cg09809950 | 21 | 26979850 | TSS200                    | <i>MRPL39</i>     | -5.657±0.494 | -5.978±0.493 | 4.78E-03 |
| cg15842400 | 21 | 27107004 | TSS1500                   | <i>GABPA</i>      | -5.098±0.356 | -5.432±0.456 | 1.65E-04 |
| cg19891733 | 21 | 27108257 | TSS1500                   | <i>ATP5J</i>      | -4.58±0.467  | -4.888±0.545 | 5.63E-03 |
| cg17266238 | 21 | 29385056 | TSS1500                   | <i>LINC00314</i>  | 1.734±0.516  | 1.39±0.552   | 4.33E-03 |
| cg06940107 | 21 | 29911783 | GeneBody/1st exon         | <i>LINC00161</i>  | 0.282±0.644  | -0.136±0.789 | 7.14E-03 |
| cg23772557 | 21 | 30397240 | GeneBody/5'UTR/1st intron | <i>USP16</i>      | -5.407±0.462 | -5.76±0.516  | 1.27E-03 |
| cg02493771 | 21 | 31744328 | GeneBody/1st exon         | <i>KRTAP13-2</i>  | -1.614±0.701 | -2.093±0.64  | 2.66E-03 |
| cg02764897 | 21 | 31768311 | TSS200                    | <i>KRTAP13-1</i>  | -0.026±0.911 | -0.578±0.876 | 7.82E-03 |
| cg27071517 | 21 | 31768726 | GeneBody/1st exon         | <i>KRTAP13-1</i>  | 1.232±0.527  | 0.887±0.606  | 5.86E-03 |
| cg14062083 | 21 | 31802829 | GeneBody/1st exon         | <i>KRTAP13-4</i>  | 1.146±0.778  | 0.579±0.863  | 2.02E-03 |
| cg15606663 | 21 | 31812603 | TSS200                    | <i>KRTAP15-1</i>  | 0.1±0.705    | -0.404±0.756 | 2.30E-03 |
| cg16812893 | 21 | 31813075 | GeneBody/1st exon/3'UTR   | <i>KRTAP15-1</i>  | 0.365±0.722  | -0.097±0.78  | 6.21E-03 |
| cg09828634 | 21 | 31859610 | GeneBody/1st exon         | <i>KRTAP19-2</i>  | 2.042±0.902  | 1.381±0.966  | 1.78E-03 |
| cg07374637 | 21 | 31875448 | TSS1500                   | <i>KRTAP19-5</i>  | 1.645±0.739  | 0.989±0.914  | 2.99E-04 |
| cg17503750 | 21 | 31913933 | GeneBody/1st exon/3'UTR   | <i>KRTAP19-6</i>  | 1.664±0.629  | 1.178±0.747  | 1.48E-03 |
| cg06324671 | 21 | 31933511 | GeneBody/1st exon         | <i>KRTAP19-7</i>  | 2.954±0.727  | 2.258±0.918  | 1.16E-04 |
| cg19306866 | 21 | 31970997 | 0                         | 0                 | 1.799±0.727  | 1.099±0.904  | 1.02E-04 |
| cg24423088 | 21 | 32185365 | GeneBody/1st exon         | <i>KRTAP8-1</i>   | 2.482±1.282  | 1.411±1.185  | 3.07E-04 |
| cg07014174 | 21 | 32253760 | GeneBody/1st exon         | <i>KRTAP11-1</i>  | 0.301±0.9    | -0.384±0.897 | 1.03E-03 |
| cg22643217 | 21 | 32253964 | TSS200                    | <i>KRTAP11-1</i>  | 0.22±0.641   | -0.234±0.792 | 3.50E-03 |
| cg18841894 | 21 | 33031735 | TSS200                    | <i>SOD1</i>       | -4.995±0.537 | -5.362±0.636 | 4.41E-03 |
| cg19948014 | 21 | 33032656 | GeneBody/1st intron       | <i>SOD1</i>       | -5.311±0.577 | -5.71±0.637  | 3.27E-03 |
| cg06510830 | 21 | 33651316 | GeneBody/1st exon         | <i>MIS18A</i>     | -5.208±0.412 | -5.689±0.78  | 5.52E-05 |
| cg25505974 | 21 | 33984651 | GeneBody/1st exon         | <i>C21orf59</i>   | -5.094±0.409 | -5.636±0.679 | 2.22E-06 |
| cg20644453 | 21 | 33985338 | TSS1500                   | <i>C21orf59</i>   | -4.853±0.358 | -5.178±0.498 | 3.56E-04 |
| cg04047710 | 21 | 34143336 | GeneBody/1st intron       | <i>PAXBP1</i>     | -4.572±0.304 | -4.89±0.365  | 2.49E-05 |
| cg06665941 | 21 | 34602869 | GeneBody/5'UTR/1st intron | <i>IFNAR2</i>     | -5.111±0.324 | -5.405±0.435 | 2.97E-04 |
| cg17506742 | 21 | 34638971 | GeneBody/1st intron       | <i>IL10RB</i>     | -4.369±0.266 | -4.61±0.449  | 8.64E-04 |
| cg16803817 | 21 | 34851621 | GeneBody/5'UTR/1st intron | <i>TMEM50B</i>    | -3.643±0.288 | -3.916±0.327 | 9.51E-05 |
| cg04383274 | 21 | 34863711 | GeneBody/5'UTR/1st exon   | <i>DNAJC28</i>    | -3.892±0.329 | -4.095±0.351 | 8.21E-03 |
| cg13617782 | 21 | 34915953 | GeneBody/1st intron       | <i>SON</i>        | -4.593±0.466 | -4.861±0.392 | 9.65E-03 |
| cg22407574 | 21 | 34960583 | GeneBody/1st intron       | <i>DONSON</i>     | -4.757±0.325 | -5.031±0.43  | 7.03E-04 |
| cg18665023 | 21 | 35287873 | GeneBody/1st intron       | <i>ATP5O</i>      | -4.287±0.33  | -4.586±0.524 | 6.35E-04 |
| cg15249164 | 21 | 35288186 | TSS200                    | <i>ATP5O</i>      | -5.949±0.553 | -6.392±0.537 | 5.51E-04 |
| cg20206574 | 21 | 35987860 | TSS1500                   | <i>RCAN1</i>      | -3.568±0.412 | -3.924±0.585 | 6.71E-04 |
| cg01962969 | 21 | 37442104 | TSS200                    | <i>CBR1</i>       | -4.428±0.31  | -4.74±0.468  | 1.27E-04 |
| cg13552650 | 21 | 37692233 | TSS1500                   | <i>MORC3</i>      | -2.812±0.364 | -2.456±0.42  | 6.25E-05 |
| cg19207856 | 21 | 38444952 | GeneBody/5'UTR/1st exon   | <i>PIGP</i>       | -4.578±0.559 | -4.908±0.5   | 8.85E-03 |
| cg23361608 | 21 | 38446389 | GeneBody/5'UTR/1st intron | <i>TTG3</i>       | -4.781±0.329 | -5.175±0.569 | 1.85E-05 |
| cg18779060 | 21 | 38740667 | GeneBody/5'UTR/1st intron | <i>DYRK1A</i>     | -3.776±0.238 | -3.983±0.267 | 2.82E-04 |
| cg11890956 | 21 | 40555474 | TSS200                    | <i>PSMG1</i>      | -5.452±0.596 | -5.924±0.628 | 7.53E-04 |
| cg22982528 | 21 | 40686185 | TSS1500                   | <i>BRWD1</i>      | -5.499±0.43  | -5.864±0.49  | 4.02E-04 |
| cg12064626 | 21 | 40817896 | GeneBody/5'UTR/1st intron | <i>SH3BGR</i>     | -4.764±0.428 | -5.107±0.579 | 1.33E-03 |
| cg22152328 | 21 | 42798386 | GeneBody/5'UTR/1st intron | <i>MX1</i>        | -4.488±0.751 | -5.012±0.402 | 1.28E-03 |
| cg04469303 | 21 | 43299431 | GeneBody/1st exon         | <i>PRDM15</i>     | -5.282±0.527 | -5.695±0.606 | 1.05E-03 |
| cg11064558 | 21 | 43430383 | GeneBody/5'UTR/1st exon   | <i>ZBTB21</i>     | -5.687±0.491 | -6.08±0.565  | 8.36E-04 |
| cg11772764 | 21 | 43916603 | TSS1500                   | <i>RSPH1</i>      | -5.676±0.471 | -6.116±0.541 | 1.23E-04 |
| cg17329518 | 21 | 44299567 | GeneBody/1st exon         | <i>WDR4</i>       | -5.156±0.43  | -5.679±0.65  | 6.10E-06 |
| cg02533993 | 21 | 44299944 | TSS1500                   | <i>WDR4</i>       | -4.569±0.418 | -5.076±0.532 | 2.50E-06 |
| cg22730042 | 21 | 44528293 | TSS1500                   | <i>U2AF1</i>      | -4.08±0.345  | -4.331±0.525 | 5.13E-03 |
| cg08871016 | 21 | 45079232 | GeneBody/5'UTR/1st intron | <i>HSF2BP</i>     | -3.546±0.671 | -4.046±0.681 | 1.34E-03 |
| cg15893253 | 21 | 45195739 | GeneBody/1st intron       | <i>CSTB</i>       | -4.74±0.353  | -5.252±0.59  | 3.78E-07 |
| cg15321195 | 21 | 45285898 | GeneBody/5'UTR/1st intron | <i>AGPAT3</i>     | -3.996±0.507 | -4.322±0.465 | 4.51E-03 |
| cg24868525 | 21 | 45431669 | TSS1500                   | <i>TRAPPC10</i>   | -2.793±0.151 | -2.961±0.219 | 2.22E-05 |
| cg16606185 | 21 | 45553535 | GeneBody/5'UTR/1st exon   | <i>C21orf33</i>   | -4.535±0.305 | -4.931±0.558 | 6.95E-06 |
| cg05129930 | 21 | 45719797 | TSS200                    | <i>PFKL</i>       | -5.374±0.437 | -5.725±0.611 | 1.43E-03 |
| cg02513045 | 21 | 45759502 | TSS1500                   | <i>C21orf2</i>    | -5.325±0.522 | -5.703±0.583 | 2.17E-03 |
| cg22991148 | 21 | 46131099 | GeneBody/1st intron       | <i>TSPEAR</i>     | -3.522±0.358 | -3.856±0.495 | 2.32E-04 |
| cg02699645 | 21 | 46221599 | GeneBody/1st intron       | <i>UBE2G2</i>     | -4.75±0.301  | -4.998±0.537 | 2.97E-03 |
| cg01419679 | 21 | 46294237 | TSS1500                   | <i>PTTG1IP</i>    | -4.749±0.319 | -5.125±0.58  | 3.58E-05 |
| cg23272214 | 21 | 47269843 | TSS200                    | <i>PCBP3</i>      | 2.045±0.468  | 1.582±0.575  | 6.61E-05 |
| cg01245595 | 21 | 47648645 | GeneBody/1st exon         | <i>LSS</i>        | -4.622±0.28  | -4.91±0.518  | 2.94E-04 |
| cg16319213 | 21 | 47742881 | GeneBody/5'UTR/1st exon   | <i>C21orf58</i>   | -4.421±0.409 | -4.731±0.638 | 3.86E-03 |
| cg25110234 | 21 | 47744248 | GeneBody/1st intron       | <i>PCNT</i>       | -4.78±0.327  | -5.173±0.397 | 2.64E-06 |
| cg06725035 | 21 | 48055212 | TSS1500                   | <i>PRMT2</i>      | -4.084±0.592 | -4.628±0.747 | 2.09E-04 |
| cg13271076 | 21 | 48055715 | GeneBody/5'UTR/1st intron | <i>PRMT2</i>      | -4.395±0.272 | -4.607±0.297 | 1.01E-03 |
| cg26506209 | 22 | 18111277 | GeneBody/1st intron       | <i>ATP6V1E1</i>   | -4.049±0.32  | -4.373±0.451 | 8.06E-05 |
| cg17264817 | 22 | 18121799 | GeneBody/5'UTR/1st intron | <i>BCL2L13</i>    | -5.677±0.554 | -6.255±0.737 | 4.01E-05 |
| cg05566965 | 22 | 18256588 | GeneBody/5'UTR/1st exon   | <i>BID</i>        | -4.864±0.414 | -5.135±0.489 | 6.20E-03 |
| cg15104484 | 22 | 18560503 | TSS200                    | <i>PEX26</i>      | -4.749±0.321 | -5.171±0.493 | 1.56E-06 |
| cg16281796 | 22 | 18560863 | GeneBody/5'UTR/1st exon   | <i>PEX26</i>      | -4.585±0.321 | -4.876±0.4   | 2.36E-04 |
| cg08205655 | 22 | 18632997 | GeneBody/5'UTR/1st intron | <i>USP18</i>      | -3.938±0.476 | -4.31±0.641  | 1.69E-03 |
| cg05468303 | 22 | 18894389 | GeneBody                  | <i>DGCR6</i>      | -2.367±0.581 | -2.766±0.556 | 2.72E-03 |
| cg00812502 | 22 | 19109875 | GeneBody/5'UTR/1st exon   | <i>DGCR2</i>      | -5.802±0.541 | -6.16±0.637  | 5.62E-03 |
| cg16621987 | 22 | 19110328 | TSS1500                   | <i>DGCR2</i>      | -3.51±0.514  | -3.902±0.552 | 1.18E-03 |
| cg00747849 | 22 | 19165386 | GeneBody                  | <i>SLC25A1</i>    | -1.299±0.293 | -1.551±0.607 | 4.17E-03 |

|            |    |          |                           |           |              |              |          |
|------------|----|----------|---------------------------|-----------|--------------|--------------|----------|
| cg17881637 | 22 | 19420236 | GeneBody/1st intron       | MRPL40    | -4.829±0.272 | -5.282±0.481 | 3.01E-08 |
| cg25841091 | 22 | 19466331 | GeneBody/1st intron       | UFD1L     | -4.363±0.243 | -4.64±0.388  | 2.53E-05 |
| cg25990314 | 22 | 19841927 | GeneBody/5'UTR            | C22orf29  | -4.669±0.356 | -4.975±0.524 | 8.51E-04 |
| cg22377998 | 22 | 20004881 | TSS1500                   | ARVCF     | -3.196±0.488 | -3.583±0.62  | 1.22E-03 |
| cg18251360 | 22 | 20067313 | TSS1500                   | DGCR8     | -5.164±0.649 | -5.794±0.806 | 9.06E-05 |
| cg02630122 | 22 | 20104473 | GeneBody/5'UTR            | TRMT2A    | -3.826±0.238 | -4.077±0.391 | 1.02E-04 |
| cg09958090 | 22 | 20851056 | TSS1500                   | KLHL22    | -4.584±0.333 | -4.914±0.5   | 1.53E-04 |
| cg09788239 | 22 | 20862292 | GeneBody/1st intron       | MED15     | -4.329±0.504 | -4.779±0.587 | 2.30E-04 |
| cg19669036 | 22 | 21212365 | GeneBody/1st intron       | PI4KA     | -4.353±0.44  | -4.7±0.564   | 1.33E-03 |
| cg05139924 | 22 | 21336424 | TSS200                    | LZTR1     | -4.747±0.439 | -5.338±0.622 | 5.99E-07 |
| cg14835962 | 22 | 21355944 | TSS1500                   | THAP7-AS1 | -4.12±0.287  | -4.366±0.454 | 1.20E-03 |
| cg21372397 | 22 | 21772221 | GeneBody/5'UTR/1st intron | HIC2      | -5.863±0.444 | -6.193±0.582 | 2.63E-03 |
| cg05725452 | 22 | 21996709 | GeneBody/1st exon         | SDF2L1    | -5.455±0.616 | -5.997±0.836 | 4.55E-04 |
| cg08293367 | 22 | 22089752 | GeneBody/5'UTR/1st intron | YPEL1     | -4.113±0.27  | -4.435±0.399 | 7.52E-06 |
| cg11265916 | 22 | 22221056 | GeneBody/1st intron       | MAPK1     | -5.128±0.508 | -5.485±0.5   | 2.24E-03 |
| cg10081899 | 22 | 22307482 | TSS1500                   | PPM1F     | -4.811±0.488 | -5.219±0.554 | 4.78E-04 |
| cg18593668 | 22 | 23411986 | TSS1500                   | GNAZ      | -4.242±0.263 | -4.568±0.41  | 5.24E-06 |
| cg15572787 | 22 | 23484171 | GeneBody/5'UTR/1st exon   | RTDR1     | -6.2±0.444   | -6.481±0.455 | 5.98E-03 |
| cg25555137 | 22 | 23522748 | GeneBody/5'UTR/1st exon   | BCR       | -5.151±0.41  | -5.564±0.718 | 2.76E-04 |
| cg12279128 | 22 | 24109851 | GeneBody/1st intron       | CHCHD10   | -3.899±0.278 | -4.187±0.432 | 9.44E-05 |
| cg03290040 | 22 | 24110355 | TSS1500                   | CHCHD10   | -4.952±0.719 | -5.378±0.527 | 6.85E-03 |
| cg19906397 | 22 | 24129020 | TSS200                    | SMARCB1   | -4.409±0.323 | -4.731±0.41  | 6.56E-05 |
| cg26133068 | 22 | 24199008 | TSS200                    | SLC2A11   | -1.961±0.432 | -2.285±0.543 | 2.10E-03 |
| cg16993794 | 22 | 24199328 | GeneBody/5'UTR/1st intron | SLC2A11   | -4.161±0.461 | -4.476±0.563 | 4.68E-03 |
| cg20377673 | 22 | 24236292 | TSS1500                   | MIF       | -5.922±0.502 | -6.238±0.449 | 5.18E-03 |
| cg17647273 | 22 | 24891452 | GeneBody/1st exon         | UPB1      | 2.662±0.412  | 2.37±0.595   | 5.28E-03 |
| cg03550508 | 22 | 24951766 | GeneBody/5'UTR/1st exon   | SNRPD3    | -4.963±0.368 | -5.299±0.492 | 2.81E-04 |
| cg04626574 | 22 | 26879726 | GeneBody/1st intron       | HPS4      | -4.145±0.202 | -4.455±0.325 | 8.58E-08 |
| cg10927536 | 22 | 26880188 | GeneBody/1st intron       | SRRD      | -4.895±0.452 | -5.204±0.515 | 3.88E-03 |
| cg05352541 | 22 | 28315563 | GeneBody/1st intron       | TTC28-AS1 | -5.16±0.286  | -5.466±0.41  | 3.72E-05 |
| cg25112853 | 22 | 29136685 | GeneBody/5'UTR/1st intron | CHEK2     | 0.528±0.413  | 0.216±0.61   | 3.26E-03 |
| cg22585269 | 22 | 29137759 | GeneBody/5'UTR/1st exon   | CHEK2     | -3.03±0.7    | -3.464±0.675 | 7.50E-03 |
| cg16189954 | 22 | 29138267 | GeneBody/1st exon         | HSCB      | -4.949±0.185 | -5.181±0.333 | 1.18E-05 |
| cg15103426 | 22 | 29168792 | GeneBody/5'UTR/1st exon   | CCDC117   | -4.986±0.46  | -5.32±0.569  | 2.83E-03 |
| cg14013300 | 22 | 29196047 | GeneBody/1st intron       | XBP1      | -4.296±0.445 | -4.605±0.48  | 3.10E-03 |
| cg04329069 | 22 | 29784237 | GeneBody/5'UTR/1st intron | AP1B1     | -5.554±0.442 | -5.865±0.497 | 2.91E-03 |
| cg08693206 | 22 | 29784697 | TSS200                    | AP1B1     | -5.454±0.369 | -5.727±0.366 | 1.37E-03 |
| cg04483623 | 22 | 29949575 | GeneBody/5'UTR/1st exon   | THOC5     | -4.95±0.573  | -5.435±0.623 | 3.77E-04 |
| cg20319264 | 22 | 29977203 | TSS200                    | NIPSNAP1  | -4.895±0.505 | -5.289±0.752 | 2.43E-03 |
| cg13240639 | 22 | 30162856 | GeneBody/5'UTR/1st intron | ZMAT5     | -4.208±0.379 | -4.538±0.391 | 2.25E-04 |
| cg14859749 | 22 | 30753135 | TSS1500                   | SF3A1     | -5.619±0.441 | -6.149±0.632 | 5.66E-06 |
| cg06330324 | 22 | 31031670 | TSS200                    | SLC35E4   | -4.438±0.499 | -4.749±0.579 | 8.79E-03 |
| cg26233253 | 22 | 31032613 | GeneBody/1st exon         | SLC35E4   | 0.525±0.537  | 0.201±0.571  | 9.52E-03 |
| cg03560597 | 22 | 31064008 | TSS200                    | DUSP18    | -5.277±0.542 | -5.637±0.596 | 4.73E-03 |
| cg07006526 | 22 | 31477053 | TSS1500                   | SMTN      | -5.99±0.498  | -6.348±0.542 | 2.23E-03 |
| cg19630506 | 22 | 31477530 | GeneBody/5'UTR/1st intron | SMTN      | -4.94±0.349  | -5.299±0.462 | 4.81E-05 |
| cg03760705 | 22 | 31556320 | GeneBody/1st intron       | RNF185    | -3.352±0.582 | -4±0.684     | 8.78E-06 |
| cg03065202 | 22 | 31687698 | GeneBody/1st intron       | PIK3IP1   | -4.669±0.444 | -4.865±0.508 | 2.22E-04 |
| cg20988728 | 22 | 31688502 | GeneBody/5'UTR/1st exon   | PIK3IP1   | -4.723±0.359 | -4.987±0.354 | 1.44E-03 |
| cg23154002 | 22 | 31741741 | GeneBody/5'UTR/1st exon   | PATZ1     | -4.651±0.288 | -5.036±0.481 | 2.02E-06 |
| cg09189428 | 22 | 31743558 | TSS1500                   | PATZ1     | -5.703±0.435 | -6.038±0.473 | 1.12E-03 |
| cg25545182 | 22 | 31795303 | TSS1500                   | DRG1      | -4.747±0.289 | -5.169±0.494 | 3.81E-07 |
| cg27378424 | 22 | 31795766 | GeneBody/1st intron       | DRG1      | -5.212±0.325 | -5.516±0.458 | 2.50E-04 |
| cg00184884 | 22 | 31892343 | GeneBody/5'UTR/1st exon   | SFI1      | -5.417±0.393 | -5.886±0.55  | 5.63E-06 |
| cg03814826 | 22 | 32341378 | TSS200                    | C22orf24  | -4.783±0.407 | -5.074±0.525 | 3.54E-03 |
| cg03962522 | 22 | 32439254 | GeneBody/5'UTR/1st exon   | SLC5A1    | 0.01±0.619   | -0.377±0.645 | 6.96E-03 |
| cg09547224 | 22 | 32439259 | GeneBody/5'UTR/1st exon   | SLC5A1    | -0.856±0.612 | -1.299±0.632 | 1.89E-03 |
| cg13788301 | 22 | 35695944 | GeneBody/1st exon         | TOM1      | -4.99±0.365  | -5.252±0.443 | 2.95E-03 |
| cg13810225 | 22 | 36784323 | TSS1500                   | MYH9      | -4.141±0.36  | -4.422±0.47  | 1.56E-03 |
| cg27158143 | 22 | 36925763 | TSS1500                   | EIF3D     | -4.47±0.561  | -4.85±0.602  | 3.78E-03 |
| cg21341807 | 22 | 37172566 | TSS1500                   | IFT27     | -5.246±0.611 | -5.659±0.584 | 3.12E-03 |
| cg14850181 | 22 | 37416188 | GeneBody/5'UTR/1st intron | TST       | -5.022±0.267 | -5.381±0.401 | 8.06E-07 |
| cg21458116 | 22 | 38004573 | GeneBody/5'UTR/1st exon   | GGA1      | -4.595±0.383 | -4.873±0.39  | 1.77E-03 |
| cg04790936 | 22 | 38035753 | GeneBody/5'UTR/1st exon   | SH3BP1    | -5.831±0.51  | -6.239±0.614 | 9.41E-04 |
| cg11995732 | 22 | 38082787 | GeneBody/1st intron       | NOL12     | -5.311±0.713 | -5.736±0.533 | 6.69E-03 |
| cg12598364 | 22 | 38203677 | TSS1500                   | GCAT      | -4.7±0.328   | -5.037±0.498 | 4.97E-05 |
| cg22031736 | 22 | 38239648 | GeneBody/1st intron       | ANKRD54   | -4.713±0.602 | -5.376±0.705 | 1.06E-05 |
| cg19070798 | 22 | 38240558 | TSS200                    | MIR658    | -5.574±0.439 | -5.874±0.557 | 5.09E-03 |
| cg15853374 | 22 | 38245447 | GeneBody/5'UTR/1st exon   | EIF3L     | -4.669±0.287 | -4.847±0.273 | 6.33E-03 |
| cg17601843 | 22 | 38302113 | TSS200                    | MICALL1   | -5.734±0.54  | -6.337±0.749 | 1.66E-05 |
| cg20982583 | 22 | 38349717 | TSS200                    | C22orf23  | -5.61±0.489  | -5.965±0.506 | 1.86E-03 |
| cg15780888 | 22 | 38453087 | TSS200                    | PICK1     | -3.486±0.239 | -3.671±0.373 | 3.15E-03 |
| cg15641675 | 22 | 38902252 | GeneBody/5'UTR/1st exon   | DDX17     | -5.397±0.33  | -5.612±0.354 | 5.29E-03 |
| cg20715219 | 22 | 38902282 | GeneBody/5'UTR/1st exon   | DDX17     | -5.227±0.421 | -5.622±0.654 | 3.76E-04 |
| cg03640568 | 22 | 38902623 | TSS1500                   | DDX17     | -5.12±0.384  | -5.515±0.525 | 5.51E-05 |
| cg05845357 | 22 | 39052748 | GeneBody/5'UTR/1st exon   | CBY1      | -5.357±0.662 | -5.78±0.602  | 4.80E-03 |
| cg01206472 | 22 | 39078311 | GeneBody/1st intron       | TOMM22    | -5.825±0.494 | -6.183±0.534 | 2.02E-03 |
| cg09991975 | 22 | 39096760 | TSS1500                   | JOSD1     | -4.345±0.25  | -4.505±0.32  | 8.76E-03 |
| cg26380756 | 22 | 39097154 | TSS1500                   | JOSD1     | -5.771±0.358 | -6.17±0.579  | 3.84E-05 |
| cg09964005 | 22 | 39101703 | TSS200                    | GTPBP1    | -6.031±0.633 | -6.458±0.606 | 3.22E-03 |
| cg20652889 | 22 | 39151458 | GeneBody/5'UTR/1st exon   | SUN2      | -4.149±0.271 | -4.394±0.37  | 3.41E-04 |
| cg09783309 | 22 | 39190189 | TSS200                    | DNAL4     | -4.942±0.355 | -5.277±0.465 | 1.65E-04 |
| cg09299381 | 22 | 39190195 | TSS200                    | DNAL4     | -4.381±0.339 | -4.771±0.424 | 6.30E-06 |
| cg24649346 | 22 | 39268751 | TSS1500                   | CBX6      | -4.322±0.336 | -4.581±0.306 | 7.76E-04 |
| cg06229674 | 22 | 39492189 | TSS1500                   | APOBEC3H  | 2.444±0.313  | 2.679±0.461  | 3.50E-03 |
| cg03804568 | 22 | 39548919 | TSS1500                   | CBX7      | -4.723±0.301 | -5.088±0.498 | 1.07E-05 |
| cg24990612 | 22 | 39641132 | TSS200                    | PDGFB     | -3.358±0.566 | -3.715±0.605 | 6.83E-03 |
| cg04419707 | 22 | 39716223 | TSS1500                   | RPL3      | -4.463±0.48  | -4.779±0.673 | 8.89E-03 |
| cg12188538 | 22 | 39898620 | GeneBody/5'UTR/1st intron | SMCR7L    | -4.74±0.289  | -4.976±0.48  | 2.42E-03 |
| cg25556101 | 22 | 39928765 | GeneBody/5'UTR/1st exon   | RPS19BP1  | -4.972±0.358 | -5.288±0.568 | 8.70E-04 |
| cg13785207 | 22 | 39928927 | TSS200                    | RPS19BP1  | -4.89±0.303  | -5.118±0.248 | 8.47E-04 |
| cg13430425 | 22 | 40742577 | GeneBody/1st exon         | ADSL      | -4.782±0.306 | -5.22±0.56   | 1.10E-06 |
| cg21422622 | 22 | 40766525 | TSS200                    | SGSM3     | -4.092±0.555 | -4.63±0.591  | 5.58E-05 |
| cg23013931 | 22 | 41214857 | GeneBody/1st intron       | SLC25A17  | -4.389±0.291 | -4.77±0.473  | 2.33E-06 |
| cg25094927 | 22 | 41682102 | TSS200                    | RANGAP1   | -4.7±0.332   | -4.426±0.356 | 4.89E-04 |

|            |    |          |                           |          |              |              |          |
|------------|----|----------|---------------------------|----------|--------------|--------------|----------|
| cg21712678 | 22 | 41697701 | GeneBody/5'UTR/1st exon   | ZC3H7B   | -4.765±0.481 | -5.196±0.741 | 6.09E-04 |
| cg04137037 | 22 | 41777896 | TSS200                    | TEF      | -5.736±0.393 | -5.992±0.46  | 6.40E-03 |
| cg09416501 | 22 | 41843111 | TSS200                    | TOB2     | -4.113±0.384 | -4.389±0.402 | 2.07E-03 |
| cg08759274 | 22 | 41864680 | GeneBody/5'UTR/1st exon   | PHF5A    | -3.076±0.179 | -3.212±0.243 | 2.32E-03 |
| cg05593780 | 22 | 41864983 | TSS200                    | ACO2     | -4.652±0.46  | -4.956±0.558 | 6.15E-03 |
| cg15801967 | 22 | 42084706 | GeneBody/1st intron       | NHP2L1   | -4.763±0.276 | -4.98±0.302  | 8.70E-04 |
| cg24823993 | 22 | 42085003 | TSS200                    | NHP2L1   | -4.397±0.413 | -4.735±0.615 | 1.50E-03 |
| cg25937494 | 22 | 42228971 | TSS200                    | SREBF2   | -6.359±0.55  | -6.731±0.568 | 3.51E-03 |
| cg09869042 | 22 | 42343253 | TSS200                    | CENPM    | -4.907±0.395 | -5.205±0.605 | 3.76E-03 |
| cg04733989 | 22 | 42467013 | TSS200                    | NAGA     | -5.45±0.355  | -5.865±0.605 | 2.46E-05 |
| cg07811498 | 22 | 42475450 | TSS1500                   | SMDT1    | -4.18±0.557  | -3.723±0.566 | 4.54E-04 |
| cg10864501 | 22 | 43011545 | TSS1500                   | POLDIP3  | -3.255±0.747 | -3.911±0.817 | 2.40E-04 |
| cg01557667 | 22 | 43411403 | TSS1500                   | PACSIN2  | -5.492±0.637 | -5.932±0.563 | 2.23E-03 |
| cg10432177 | 22 | 43506591 | TSS200                    | BIK      | -4.273±0.298 | -4.59±0.399  | 2.94E-05 |
| cg14078309 | 22 | 43539574 | TSS200                    | MCAT     | -4.897±0.329 | -5.391±0.481 | 7.46E-08 |
| cg10226744 | 22 | 46068542 | GeneBody/1st intron       | ATXN10   | -4.758±0.714 | -5.263±0.591 | 1.62E-03 |
| cg04280480 | 22 | 46547117 | GeneBody/5'UTR/1st intron | PPARA    | -5.245±0.586 | -5.617±0.59  | 5.81E-03 |
| cg22396353 | 22 | 46692687 | GeneBody/5'UTR/1st exon   | GTSE1    | -6.164±0.716 | -6.73±0.646  | 5.59E-04 |
| cg03580876 | 22 | 46731674 | GeneBody/1st exon         | TRMU     | -5.623±0.438 | -6.077±0.615 | 5.61E-05 |
| cg24041977 | 22 | 47133771 | GeneBody/1st intron       | CERK     | -4.886±0.451 | -5.364±0.525 | 1.86E-05 |
| cg15149938 | 22 | 50018392 | GeneBody                  | C22orf34 | 0.834±0.607  | 0.166±0.931  | 3.48E-05 |
| cg00234961 | 22 | 50246573 | TSS1500                   | ZBED4    | -3.281±0.352 | -3.65±0.557  | 9.03E-05 |
| cg15881727 | 22 | 50248142 | GeneBody/5'UTR/1st intron | ZBED4    | -3.908±0.314 | -4.165±0.453 | 1.37E-03 |
| cg22405555 | 22 | 50311792 | GeneBody/5'UTR/1st intron | ALG12    | -5.779±0.484 | -6.117±0.488 | 2.50E-03 |
| cg19890858 | 22 | 50624742 | GeneBody/5'UTR/1st intron | TRABD    | -4.254±0.503 | -4.994±0.715 | 9.02E-08 |
| cg21028326 | 22 | 50683188 | GeneBody/5'UTR/1st exon   | TUBGCP6  | -4.271±0.477 | -4.581±0.546 | 6.17E-03 |
| cg15134628 | 22 | 50699649 | GeneBody                  | MAPK12   | -5.065±0.376 | -4.744±0.527 | 7.29E-04 |
| cg11654620 | 22 | 50969039 | TSS1500                   | TYMP     | -5.431±0.54  | -5.927±0.57  | 1.17E-04 |

<sup>a</sup>Probe IDs for the Infinium HumanMethylation27 BeadChip (Illumina). <sup>b</sup>National Center for Biotechnology Information (NCBI) Database (Genome Build 37). <sup>c</sup>Each probe was annotated as (a) from 200 bp upstream of the transcription start site (TSS) to 1500 bp upstream of it (TSS1500), (b) from TSS to 200 bp upstream of the TSS (TSS200), (c) the 5' untranslated region (UTR), (d) the 1st exon, (e) the 1st intron, and (f) the gene body (2nd exon and downstream) based on the UCSC Genome Browser (<http://genome.ucsc.edu/>).

Supplementary Table 4A. The 12,629 probes indicating significant differences in recurrence-free survival between patients showing higher DNA methylation levels and patients showing lower DNA methylation levels in adjacent normal lung tissue samples.

| Target ID <sup>a</sup> | Gene symbol       | Youden index | Number of patients                                               |                                                              | FDR, q   |
|------------------------|-------------------|--------------|------------------------------------------------------------------|--------------------------------------------------------------|----------|
|                        |                   |              | Showing higher DNA methylation levels ( $M_N \geq$ Youden index) | Showing lower DNA methylation levels ( $M_N <$ Youden index) |          |
| cg11713029             | <i>DLNB14</i>     | -5.223       | 85                                                               | 77                                                           | 1.60E-09 |
| cg12264551             | <i>LOC283377</i>  | -6.462       | 106                                                              | 56                                                           | 2.34E-08 |
| cg23546413             | <i>GDPD1</i>      | -6.021       | 72                                                               | 90                                                           | 3.46E-08 |
| cg06216677             | <i>TESK1</i>      | -5.599       | 93                                                               | 69                                                           | 3.96E-08 |
| cg22557067             | <i>NISCH</i>      | -5.207       | 59                                                               | 103                                                          | 3.97E-08 |
| cg15009698             | <i>AP3B1</i>      | -4.794       | 79                                                               | 83                                                           | 5.07E-08 |
| cg18247638             | <i>BIVM</i>       | -4.837       | 87                                                               | 75                                                           | 5.07E-08 |
| cg12754733             | <i>FLJ35119</i>   | -4.783       | 87                                                               | 75                                                           | 5.52E-08 |
| cg18581221             | <i>FLJ45645</i>   | -5.535       | 88                                                               | 74                                                           | 5.52E-08 |
| cg13825058             | <i>GAJ</i>        | -5.762       | 92                                                               | 70                                                           | 6.34E-08 |
| cg09469394             | <i>PEX13</i>      | -5.221       | 114                                                              | 48                                                           | 7.02E-08 |
| cg12658982             | <i>LOC222171</i>  | -4.862       | 83                                                               | 79                                                           | 7.02E-08 |
| cg07550267             | <i>RPS8</i>       | -4.763       | 81                                                               | 81                                                           | 8.50E-08 |
| cg23854921             | <i>AFTIPHILIN</i> | -6.422       | 69                                                               | 93                                                           | 9.12E-08 |
| cg21206959             | <i>ZWINT</i>      | -4.366       | 94                                                               | 68                                                           | 9.45E-08 |
| cg22792432             | <i>ROCK1</i>      | -6.720       | 53                                                               | 109                                                          | 9.45E-08 |
| cg14078309             | <i>MT</i>         | -5.109       | 67                                                               | 95                                                           | 1.18E-07 |
| cg12804976             | <i>NDUFA10</i>    | -4.521       | 76                                                               | 86                                                           | 1.19E-07 |
| cg03700218             | <i>NUBP2</i>      | -5.127       | 82                                                               | 80                                                           | 1.42E-07 |
| cg06530118             | <i>CLN3</i>       | -4.813       | 86                                                               | 76                                                           | 1.46E-07 |
| cg25448636             | <i>FLCN</i>       | -5.026       | 90                                                               | 72                                                           | 1.46E-07 |
| cg15802192             | <i>TUBD1</i>      | -5.870       | 106                                                              | 56                                                           | 1.46E-07 |
| cg24274600             | <i>RHOBTB3</i>    | -5.803       | 93                                                               | 69                                                           | 1.48E-07 |
| cg23679085             | <i>AP2M1</i>      | -5.255       | 92                                                               | 70                                                           | 1.54E-07 |
| cg26117023             | <i>DOK1</i>       | -5.225       | 94                                                               | 68                                                           | 1.57E-07 |
| cg00737514             | <i>TBC1D1</i>     | -5.079       | 60                                                               | 102                                                          | 1.62E-07 |
| cg10796979             | <i>LMBRD1</i>     | -5.354       | 71                                                               | 91                                                           | 1.62E-07 |
| cg17758148             | <i>JMY</i>        | 1.290        | 82                                                               | 80                                                           | 1.62E-07 |
| cg22477592             | <i>ATM</i>        | -6.546       | 53                                                               | 109                                                          | 1.62E-07 |
| cg02142461             | <i>LYAR</i>       | 0.964        | 70                                                               | 92                                                           | 1.79E-07 |
| cg06887167             | <i>CIT</i>        | -5.387       | 95                                                               | 67                                                           | 2.05E-07 |
| cg21656748             | <i>SCARB2</i>     | -6.017       | 73                                                               | 89                                                           | 2.05E-07 |
| cg25287375             | <i>OSTF1</i>      | -5.261       | 72                                                               | 90                                                           | 2.05E-07 |
| cg04057053             | <i>WNT2B</i>      | -5.932       | 68                                                               | 94                                                           | 2.05E-07 |
| cg24809768             | <i>RARS</i>       | -4.935       | 69                                                               | 93                                                           | 2.12E-07 |
| cg21624883             | <i>IPPK</i>       | -5.087       | 90                                                               | 72                                                           | 2.14E-07 |
| cg13919607             | <i>ZNF434</i>     | -5.514       | 94                                                               | 68                                                           | 2.25E-07 |
| cg03079549             | <i>PLDN</i>       | -5.741       | 75                                                               | 87                                                           | 2.29E-07 |
| cg05508048             | <i>DDX26</i>      | -5.028       | 93                                                               | 69                                                           | 2.29E-07 |
| cg26093711             | <i>VRK2</i>       | -5.128       | 97                                                               | 65                                                           | 2.29E-07 |
| cg14899547             | <i>FLJ40629</i>   | -5.497       | 77                                                               | 85                                                           | 2.63E-07 |
| cg10673984             | <i>PPM1D</i>      | -5.931       | 76                                                               | 86                                                           | 2.75E-07 |
| cg11970301             | <i>PPP4C</i>      | -4.461       | 93                                                               | 69                                                           | 2.95E-07 |
| cg16769376             | <i>MDP-1</i>      | -5.364       | 60                                                               | 102                                                          | 2.95E-07 |
| cg23207616             | <i>RER1</i>       | -5.950       | 90                                                               | 72                                                           | 2.95E-07 |
| cg23089298             | <i>SEMA4C</i>     | -5.034       | 86                                                               | 76                                                           | 3.06E-07 |
| cg06689536             | <i>CCNF</i>       | -5.012       | 92                                                               | 70                                                           | 3.10E-07 |

|            |                  |        |     |     |          |
|------------|------------------|--------|-----|-----|----------|
| cg10753582 | <i>KIFAP3</i>    | -4.186 | 68  | 94  | 3.34E-07 |
| cg12076344 | <i>SLC27A4</i>   | -5.580 | 64  | 98  | 3.45E-07 |
| cg22587514 | <i>MRPS2</i>     | -5.192 | 72  | 90  | 3.45E-07 |
| cg25549230 | <i>ZNF272</i>    | -5.777 | 80  | 82  | 3.48E-07 |
| cg06707338 | <i>EEF1B2</i>    | -5.763 | 79  | 83  | 3.54E-07 |
| cg11995303 | <i>DCUN1D5</i>   | -5.044 | 78  | 84  | 3.54E-07 |
| cg16915794 | <i>RAB13</i>     | -4.843 | 90  | 72  | 3.54E-07 |
| cg17213552 | <i>DLAT</i>      | -5.354 | 76  | 86  | 3.54E-07 |
| cg09283635 | <i>LOC168850</i> | -6.159 | 98  | 64  | 3.62E-07 |
| cg25786436 | <i>PRKAG2</i>    | -5.619 | 91  | 71  | 3.69E-07 |
| cg02250992 | <i>SCARB1</i>    | -6.159 | 89  | 73  | 3.96E-07 |
| cg12657853 | <i>HSF2</i>      | -5.014 | 73  | 89  | 3.96E-07 |
| cg16685860 | <i>PLD2</i>      | -5.762 | 94  | 68  | 3.96E-07 |
| cg17601843 | <i>MICAL-L1</i>  | -6.016 | 65  | 97  | 3.97E-07 |
| cg23352579 | <i>RDX</i>       | -5.076 | 83  | 79  | 3.97E-07 |
| cg19311602 | <i>FLJ10006</i>  | -5.935 | 76  | 86  | 4.00E-07 |
| cg25110234 | <i>PCNT2</i>     | -5.122 | 84  | 78  | 4.11E-07 |
| cg01687051 | <i>LUC7L</i>     | -4.770 | 83  | 79  | 4.27E-07 |
| cg12697789 | <i>TLR3</i>      | -3.554 | 104 | 58  | 4.27E-07 |
| cg24621354 | <i>TES</i>       | -4.428 | 75  | 87  | 4.43E-07 |
| cg25234963 | <i>SFRS14</i>    | -4.709 | 95  | 67  | 4.47E-07 |
| cg07569756 | <i>LRRC59</i>    | -4.980 | 79  | 83  | 4.49E-07 |
| cg15645605 | <i>MRPL35</i>    | -5.166 | 79  | 83  | 4.49E-07 |
| cg23190203 | <i>SFXN3</i>     | -5.218 | 70  | 92  | 4.49E-07 |
| cg06624832 | <i>NAT9</i>      | -5.374 | 89  | 73  | 4.49E-07 |
| cg25545182 | <i>DRG1</i>      | -5.084 | 86  | 76  | 4.49E-07 |
| cg06819200 | <i>ECE1</i>      | -6.160 | 56  | 106 | 5.17E-07 |
| cg02813021 | <i>ZMYND11</i>   | -5.687 | 76  | 86  | 5.30E-07 |
| cg03493069 | <i>PSCD1</i>     | -4.651 | 99  | 63  | 5.30E-07 |
| cg04589975 | <i>FLJ20558</i>  | -5.897 | 51  | 111 | 5.30E-07 |
| cg11977634 | <i>DDR1</i>      | -4.343 | 91  | 71  | 5.30E-07 |
| cg15749322 | <i>ANKRD42</i>   | -4.898 | 88  | 74  | 5.30E-07 |
| cg18435900 | <i>ZNF485</i>    | -6.112 | 83  | 79  | 5.30E-07 |
| cg20122491 | <i>ZFP95</i>     | -5.850 | 106 | 56  | 5.30E-07 |
| cg20821095 | <i>FADD</i>      | -4.887 | 52  | 110 | 5.30E-07 |
| cg07672479 | <i>DYNC1H1</i>   | -5.398 | 51  | 111 | 5.30E-07 |
| cg02437376 | <i>VDAC2</i>     | -5.413 | 97  | 65  | 5.41E-07 |
| cg04690289 | <i>EXOSC7</i>    | -5.161 | 76  | 86  | 5.41E-07 |
| cg19369775 | <i>LOC153364</i> | -5.152 | 73  | 89  | 5.71E-07 |
| cg26382071 | <i>TXNL5</i>     | -4.831 | 94  | 68  | 5.85E-07 |
| cg22396353 | <i>GTSE1</i>     | -6.383 | 55  | 107 | 5.89E-07 |
| cg27477594 | <i>MGST3</i>     | -5.243 | 93  | 69  | 5.89E-07 |
| cg07927484 | <i>NS4ATP2</i>   | -4.976 | 87  | 75  | 6.00E-07 |
| cg19538699 | <i>SLC35A5</i>   | -5.163 | 86  | 76  | 6.14E-07 |
| cg13098382 | <i>RNF38</i>     | -4.842 | 90  | 72  | 6.14E-07 |
| cg04619859 | <i>MGC5242</i>   | -5.790 | 76  | 86  | 6.35E-07 |
| cg11815363 | <i>KCNK1</i>     | -4.261 | 93  | 69  | 6.35E-07 |
| cg18384168 | <i>FGF22</i>     | -5.471 | 87  | 75  | 6.41E-07 |
| cg15733507 | <i>C9orf140</i>  | -5.243 | 73  | 89  | 6.42E-07 |
| cg10348863 | <i>ING2</i>      | -5.282 | 70  | 92  | 6.45E-07 |
| cg26809210 | <i>STAMPB</i>    | -5.046 | 68  | 94  | 6.47E-07 |
| cg11434468 | <i>XKR6</i>      | -5.333 | 81  | 81  | 6.58E-07 |
| cg05191792 | <i>WRNIP1</i>    | -5.754 | 86  | 76  | 6.74E-07 |
| cg15948326 | <i>C11orf45</i>  | -4.718 | 85  | 77  | 6.74E-07 |
| cg07897193 | <i>SOCS5</i>     | -5.285 | 80  | 82  | 6.80E-07 |

|            |                  |        |     |     |          |
|------------|------------------|--------|-----|-----|----------|
| cg09686308 | <i>CIB3</i>      | 0.732  | 67  | 95  | 6.82E-07 |
| cg25910443 | <i>C9orf3</i>    | -5.802 | 99  | 63  | 6.83E-07 |
| cg17810944 | <i>GDAP1L1</i>   | -3.084 | 71  | 91  | 6.87E-07 |
| cg09299381 | <i>DNAL4</i>     | -4.760 | 90  | 72  | 7.21E-07 |
| cg13620770 | <i>BAD</i>       | -2.050 | 95  | 67  | 7.21E-07 |
| cg14074641 | <i>ABCC12</i>    | -0.013 | 60  | 102 | 7.33E-07 |
| cg00833393 | <i>CREB3</i>     | -5.024 | 92  | 70  | 7.77E-07 |
| cg02060988 | <i>LASP1</i>     | -5.673 | 99  | 63  | 7.77E-07 |
| cg07789904 | <i>MAD2L2</i>    | -4.767 | 84  | 78  | 7.77E-07 |
| cg18124330 | <i>C12orf5</i>   | -4.940 | 94  | 68  | 7.77E-07 |
| cg22805632 | <i>KRT10</i>     | 2.429  | 72  | 90  | 7.77E-07 |
| cg04802801 | <i>PPP1R11</i>   | -4.604 | 90  | 72  | 7.86E-07 |
| cg24146166 | <i>ZNF25</i>     | -4.764 | 64  | 98  | 8.40E-07 |
| cg26035463 | <i>FBXO21</i>    | -4.391 | 92  | 70  | 8.40E-07 |
| cg03483654 | <i>DAK</i>       | 5.346  | 97  | 65  | 8.75E-07 |
| cg07833035 | <i>RPS23</i>     | -5.586 | 88  | 74  | 8.82E-07 |
| cg25632203 | <i>ZNF643</i>    | -5.250 | 94  | 68  | 8.99E-07 |
| cg18497960 | <i>RBM12</i>     | -4.734 | 91  | 71  | 9.00E-07 |
| cg25454755 | <i>NR4A3</i>     | -4.583 | 61  | 101 | 9.09E-07 |
| cg17872476 | <i>VTI1A</i>     | 0.405  | 74  | 88  | 9.18E-07 |
| cg18236297 | <i>CYSLTR2</i>   | 1.349  | 78  | 84  | 9.19E-07 |
| cg26258330 | <i>ZFAND1</i>    | -4.287 | 70  | 92  | 9.19E-07 |
| cg14773282 | <i>GMIP</i>      | -5.657 | 69  | 93  | 9.39E-07 |
| cg09725013 | <i>GTF3C1</i>    | -5.681 | 63  | 99  | 9.73E-07 |
| cg15893253 | <i>CSTB</i>      | -5.084 | 80  | 82  | 9.73E-07 |
| cg21768899 | <i>LOC387882</i> | -6.005 | 75  | 87  | 9.73E-07 |
| cg03860051 | <i>ACADSB</i>    | -5.723 | 107 | 55  | 9.77E-07 |
| cg08923379 | <i>ODF2</i>      | -6.136 | 66  | 96  | 9.77E-07 |
| cg15286905 | <i>ACBD5</i>     | -4.694 | 115 | 47  | 9.88E-07 |
| cg04506546 | <i>SLC35C2</i>   | -6.279 | 49  | 113 | 9.92E-07 |
| cg17547792 | <i>GPR30</i>     | -5.554 | 76  | 86  | 1.04E-06 |
| cg09546332 | <i>PARP4</i>     | -5.557 | 106 | 56  | 1.05E-06 |
| cg11064206 | <i>ABCB9</i>     | -5.311 | 92  | 70  | 1.05E-06 |
| cg18251360 | <i>DGCR8</i>     | -5.293 | 50  | 112 | 1.05E-06 |
| cg25324046 | <i>SRPK1</i>     | -5.010 | 84  | 78  | 1.05E-06 |
| cg14602658 | <i>TMEM39A</i>   | -5.334 | 105 | 57  | 1.06E-06 |
| cg13887370 | <i>DNAJC14</i>   | -4.997 | 73  | 89  | 1.07E-06 |
| cg12598364 | <i>GCAT</i>      | -5.205 | 107 | 55  | 1.07E-06 |
| cg25307081 | <i>BRD7</i>      | -0.972 | 46  | 116 | 1.09E-06 |
| cg08907850 | <i>IDI1</i>      | -5.409 | 84  | 78  | 1.13E-06 |
| cg20150743 | <i>ZNF3</i>      | -4.929 | 69  | 93  | 1.14E-06 |
| cg11592951 | <i>ARS2</i>      | -6.191 | 72  | 90  | 1.14E-06 |
| cg02147791 | <i>SAP18</i>     | -2.225 | 83  | 79  | 1.16E-06 |
| cg04286043 | <i>C6orf69</i>   | -4.544 | 68  | 94  | 1.16E-06 |
| cg08757531 | <i>FAM103A1</i>  | -5.340 | 75  | 87  | 1.16E-06 |
| cg17048483 | <i>RBM7</i>      | -5.107 | 97  | 65  | 1.16E-06 |
| cg18710692 | <i>ZMYM5</i>     | -5.397 | 88  | 74  | 1.16E-06 |
| cg21644628 | <i>FLJ20718</i>  | 1.426  | 73  | 89  | 1.16E-06 |
| cg27372468 | <i>SLC22A4</i>   | -5.371 | 91  | 71  | 1.16E-06 |
| cg19728485 | <i>PQLC3</i>     | -5.950 | 87  | 75  | 1.18E-06 |
| cg15359413 | <i>FIGNL1</i>    | -5.097 | 67  | 95  | 1.19E-06 |
| cg14452789 | <i>GMCL1</i>     | -6.259 | 108 | 54  | 1.20E-06 |
| cg10226744 | <i>ATXN10</i>    | -5.217 | 102 | 60  | 1.20E-06 |
| cg14303330 | <i>RPL22</i>     | -4.088 | 104 | 58  | 1.20E-06 |
| cg15659828 | <i>CHID1</i>     | -4.360 | 95  | 67  | 1.20E-06 |

|            |          |        |     |     |          |
|------------|----------|--------|-----|-----|----------|
| cg02497175 | NLK      | -4.721 | 78  | 84  | 1.23E-06 |
| cg03256955 | TGFBR2   | -4.497 | 63  | 99  | 1.23E-06 |
| cg11237883 | MDH2     | -5.082 | 72  | 90  | 1.23E-06 |
| cg20120491 | DMC1     | -3.066 | 80  | 82  | 1.23E-06 |
| cg25816468 | PBXIP1   | -5.174 | 78  | 84  | 1.23E-06 |
| cg20630567 | MGC12981 | -5.214 | 101 | 61  | 1.24E-06 |
| cg26131019 | LRIG1    | -4.673 | 82  | 80  | 1.24E-06 |
| cg15321195 | AGPAT3   | -4.006 | 47  | 115 | 1.24E-06 |
| cg13669583 | MGC2474  | -0.421 | 92  | 70  | 1.26E-06 |
| cg10645943 | STRA13   | -5.599 | 105 | 57  | 1.26E-06 |
| cg05467918 | ACADM    | -5.332 | 76  | 86  | 1.28E-06 |
| cg23099347 | C16orf53 | -5.548 | 77  | 85  | 1.28E-06 |
| cg27262488 | ITCH     | -5.775 | 69  | 93  | 1.31E-06 |
| cg00098239 | NTE      | -5.517 | 85  | 77  | 1.32E-06 |
| cg16176301 | C11orf17 | -5.678 | 89  | 73  | 1.32E-06 |
| cg25211525 | C6orf145 | -6.111 | 105 | 57  | 1.32E-06 |
| cg26229274 | SLC22A4  | -5.740 | 59  | 103 | 1.32E-06 |
| cg01100796 | CPT2     | -2.994 | 67  | 95  | 1.33E-06 |
| cg26359240 | HSDL1    | 2.986  | 69  | 93  | 1.34E-06 |
| cg00012792 | TXNDC5   | -4.569 | 83  | 79  | 1.39E-06 |
| cg05334253 | NDEL1    | -4.804 | 86  | 76  | 1.39E-06 |
| cg06178072 | HSPC176  | 2.898  | 93  | 69  | 1.39E-06 |
| cg06288632 | PREB     | 4.384  | 70  | 92  | 1.39E-06 |
| cg06672652 | SNRPE    | -4.666 | 74  | 88  | 1.39E-06 |
| cg06907544 | FLJ35785 | 1.765  | 53  | 109 | 1.39E-06 |
| cg07314414 | SAP130   | -3.018 | 112 | 50  | 1.39E-06 |
| cg11696575 | ING3     | -6.279 | 78  | 84  | 1.39E-06 |
| cg16978070 | FLJ39370 | -5.038 | 93  | 69  | 1.39E-06 |
| cg18356330 | GTF2E2   | -5.425 | 95  | 67  | 1.39E-06 |
| cg22404646 | CD151    | -5.786 | 89  | 73  | 1.39E-06 |
| cg23123262 | ACTR1B   | -5.376 | 84  | 78  | 1.39E-06 |
| cg23213688 | EXOC8    | -4.764 | 78  | 84  | 1.39E-06 |
| cg01419675 | RHOB     | -3.824 | 99  | 63  | 1.43E-06 |
| cg02947222 | PHLDA1   | -5.527 | 73  | 89  | 1.43E-06 |
| cg21337430 | APEX1    | -4.557 | 80  | 82  | 1.43E-06 |
| cg21573601 | PTEN     | -5.524 | 64  | 98  | 1.43E-06 |
| cg26809911 | COG7     | -4.835 | 77  | 85  | 1.43E-06 |
| cg13846555 | PSMB10   | -4.976 | 114 | 48  | 1.44E-06 |
| cg12124516 | MCM6     | -4.715 | 101 | 61  | 1.45E-06 |
| cg19038228 | FLJ90834 | -4.976 | 100 | 62  | 1.55E-06 |
| cg03958344 | CNP      | -5.901 | 98  | 64  | 1.56E-06 |
| cg04466273 | TBK1     | -5.064 | 68  | 94  | 1.57E-06 |
| cg25664725 | NAGLU    | -5.874 | 79  | 83  | 1.57E-06 |
| cg02533993 | WDR4     | -5.179 | 107 | 55  | 1.57E-06 |
| cg10194829 | FGF17    | -1.983 | 50  | 112 | 1.57E-06 |
| cg18891387 | NDUFA11  | -5.002 | 63  | 99  | 1.58E-06 |
| cg04531710 | EIF4G1   | -5.928 | 69  | 93  | 1.62E-06 |
| cg14314795 | TTC4     | -5.384 | 53  | 109 | 1.62E-06 |
| cg08469834 | CASP4    | -3.904 | 72  | 90  | 1.62E-06 |
| cg20023578 | TCF7L2   | -3.750 | 96  | 66  | 1.63E-06 |
| cg04025590 | CCDC21   | -5.258 | 78  | 84  | 1.63E-06 |
| cg01464985 | ZNF512   | -2.624 | 84  | 78  | 1.65E-06 |
| cg21682382 | TMEM39B  | -4.364 | 101 | 61  | 1.65E-06 |
| cg22622495 | CDC7     | -5.708 | 69  | 93  | 1.65E-06 |
| cg25416014 | MCF2L2   | -4.007 | 78  | 84  | 1.66E-06 |

|            |                |        |     |     |          |
|------------|----------------|--------|-----|-----|----------|
| cg22677246 | COTL1          | -6.018 | 68  | 94  | 1.66E-06 |
| cg17065601 | SUMO2          | -5.203 | 77  | 85  | 1.70E-06 |
| cg04828892 | PPM1J          | -6.152 | 95  | 67  | 1.70E-06 |
| cg18189938 | EPB41          | -6.210 | 68  | 94  | 1.70E-06 |
| cg03879902 | GIPR           | -3.871 | 61  | 101 | 1.73E-06 |
| cg01952458 | ATP6V1B2       | -4.911 | 73  | 89  | 1.76E-06 |
| cg03947362 | FLJ37953       | -5.627 | 86  | 76  | 1.76E-06 |
| cg04525496 | CSPG2          | -4.452 | 94  | 68  | 1.76E-06 |
| cg15398448 | PTOV1          | -5.911 | 84  | 78  | 1.76E-06 |
| cg00436301 | NT5DC1         | -4.866 | 75  | 87  | 1.76E-06 |
| cg00792740 | UBE3A          | -3.827 | 80  | 82  | 1.76E-06 |
| cg02115041 | NPBWR1         | -3.278 | 85  | 77  | 1.76E-06 |
| cg06463913 | BET1L          | -5.874 | 60  | 102 | 1.76E-06 |
| cg09458170 | ATXN3          | -4.698 | 63  | 99  | 1.76E-06 |
| cg09665592 | DPM2           | -4.790 | 91  | 71  | 1.76E-06 |
| cg12107692 | BCL2L12        | -4.455 | 107 | 55  | 1.76E-06 |
| cg14461963 | DHTKD1         | -4.545 | 80  | 82  | 1.76E-06 |
| cg15092544 | RAP1B          | -6.496 | 94  | 68  | 1.76E-06 |
| cg21968580 | DNAJB4         | -3.488 | 74  | 88  | 1.76E-06 |
| cg25306927 | VSNL1          | -4.629 | 80  | 82  | 1.76E-06 |
| cg19400876 | LRRC42         | -4.992 | 80  | 82  | 1.76E-06 |
| cg14358709 | RNF19          | -5.632 | 92  | 70  | 1.79E-06 |
| cg20868410 | HBEGF          | -4.854 | 86  | 76  | 1.79E-06 |
| cg10239941 | MPV17          | -4.678 | 75  | 87  | 1.81E-06 |
| cg07914959 | BACH2          | -5.170 | 54  | 108 | 1.82E-06 |
| cg11541187 | SESN1          | -4.818 | 68  | 94  | 1.82E-06 |
| cg06197006 | CRK            | -5.046 | 80  | 82  | 1.82E-06 |
| cg03565782 | IER5           | -6.637 | 74  | 88  | 1.84E-06 |
| cg17732044 | PEX11A         | -4.823 | 46  | 116 | 1.85E-06 |
| cg16482226 | CNOT2          | -4.981 | 90  | 72  | 1.86E-06 |
| cg08211967 | AKAP13         | -4.797 | 87  | 75  | 1.88E-06 |
| cg15460516 | TNFRSF12A      | -5.698 | 76  | 86  | 1.88E-06 |
| cg03266904 | CNOT4          | -5.629 | 42  | 120 | 1.92E-06 |
| cg11118665 | TCFL5          | -5.296 | 96  | 66  | 1.96E-06 |
| cg20379012 | C8orf36        | -5.744 | 89  | 73  | 1.96E-06 |
| cg24595957 | PARP2          | -5.285 | 86  | 76  | 1.96E-06 |
| cg16822189 | BACE1          | -5.756 | 51  | 111 | 2.01E-06 |
| cg02505689 | DBF4B          | -5.643 | 81  | 81  | 2.03E-06 |
| cg04036714 | NAPE-PLD       | -5.603 | 79  | 83  | 2.03E-06 |
| cg13873733 | MASA           | -2.897 | 53  | 109 | 2.03E-06 |
| cg14671488 | YES1           | -3.295 | 95  | 66  | 2.03E-06 |
| cg18776764 | BCL6           | -5.822 | 79  | 83  | 2.03E-06 |
| cg22192762 | PLXNC1         | -5.407 | 66  | 96  | 2.03E-06 |
| cg01007201 | CLEC4A         | 2.365  | 88  | 74  | 2.03E-06 |
| cg05439318 | CYB5-M         | -5.265 | 84  | 78  | 2.06E-06 |
| cg06956646 | SOS2           | -5.401 | 104 | 58  | 2.06E-06 |
| cg20224517 | THUMPD2        | -3.567 | 71  | 91  | 2.06E-06 |
| cg21837443 | FLJ20647       | -4.854 | 51  | 111 | 2.06E-06 |
| cg08390021 | C18orf54       | -5.791 | 52  | 110 | 2.06E-06 |
| cg12721546 | BCLAF1         | -5.540 | 39  | 123 | 2.06E-06 |
| cg25622628 | C19orf24       | -6.103 | 108 | 54  | 2.06E-06 |
| cg07314337 | ARL6IP6        | -6.244 | 64  | 98  | 2.07E-06 |
| cg11837864 | C2orf17        | -4.777 | 58  | 104 | 2.07E-06 |
| cg21300561 | K-ALPHA-1      | -5.432 | 82  | 80  | 2.09E-06 |
| cg13332925 | ANKZFp451M2119 | -6.174 | 38  | 124 | 2.12E-06 |

|            |           |        |     |     |          |
|------------|-----------|--------|-----|-----|----------|
| cg08778586 | ZCCHC17   | -5.301 | 97  | 65  | 2.13E-06 |
| cg10671802 | MGC23280  | -4.577 | 78  | 84  | 2.13E-06 |
| cg18533466 | RREB1     | -5.758 | 79  | 83  | 2.13E-06 |
| cg23922914 | TGDS      | -5.596 | 52  | 110 | 2.13E-06 |
| cg02257681 | DDAH2     | -4.870 | 72  | 90  | 2.13E-06 |
| cg21085625 | DBI       | -5.213 | 57  | 105 | 2.17E-06 |
| cg26289824 | KBTBD3    | -5.274 | 85  | 77  | 2.17E-06 |
| cg06381133 | FRS3      | -4.584 | 90  | 72  | 2.17E-06 |
| cg07962043 | HSPA5BP1  | -3.597 | 62  | 100 | 2.17E-06 |
| cg26561611 | WBSCR22   | -5.315 | 103 | 59  | 2.17E-06 |
| cg11735605 | ZNFN1A2   | -4.932 | 95  | 67  | 2.19E-06 |
| cg07285838 | FLJ21106  | -3.897 | 89  | 73  | 2.21E-06 |
| cg01699584 | KCTD8     | -5.384 | 62  | 100 | 2.23E-06 |
| cg11274211 | C9orf42   | -4.905 | 99  | 63  | 2.23E-06 |
| cg19524049 | NCDN      | -5.277 | 74  | 88  | 2.23E-06 |
| cg21681756 | NDUFS3    | -5.013 | 76  | 86  | 2.23E-06 |
| cg23692497 | INT4      | -4.777 | 101 | 61  | 2.23E-06 |
| cg24908499 | EGFL9     | -4.054 | 64  | 98  | 2.23E-06 |
| cg03217964 | ZFP1      | -4.844 | 91  | 71  | 2.24E-06 |
| cg17043922 | C6orf106  | -2.207 | 60  | 102 | 2.24E-06 |
| cg23142964 | SSX2IP    | -5.974 | 76  | 86  | 2.24E-06 |
| cg07347137 | ZCCHC11   | -4.773 | 49  | 113 | 2.26E-06 |
| cg09306577 | MFN2      | -4.434 | 84  | 78  | 2.26E-06 |
| cg03521347 | NUDCD3    | -5.795 | 61  | 101 | 2.28E-06 |
| cg03591594 | VLDLR     | -5.206 | 59  | 103 | 2.28E-06 |
| cg03820909 | C10orf137 | -6.798 | 94  | 68  | 2.28E-06 |
| cg05401645 | LOC162427 | -6.459 | 85  | 77  | 2.28E-06 |
| cg08216792 | LIG4      | -4.754 | 99  | 63  | 2.28E-06 |
| cg11819013 | IMPDH2    | -5.766 | 69  | 93  | 2.28E-06 |
| cg19939660 | C19orf36  | -5.550 | 63  | 99  | 2.28E-06 |
| cg01536400 | NDUFA8    | 2.793  | 87  | 75  | 2.32E-06 |
| cg05898356 | ARHGAP11A | -4.715 | 101 | 61  | 2.32E-06 |
| cg05920090 | HSPA1A    | -4.531 | 92  | 70  | 2.32E-06 |
| cg13841138 | STK11     | -5.903 | 48  | 114 | 2.32E-06 |
| cg22495162 | LSM6      | -5.615 | 84  | 78  | 2.32E-06 |
| cg04211818 | BTBD12    | -5.946 | 89  | 73  | 2.33E-06 |
| cg11772764 | TSGA2     | -5.933 | 61  | 101 | 2.33E-06 |
| cg13433272 | CDK8      | -4.535 | 51  | 111 | 2.33E-06 |
| cg22264946 | C6orf84   | -6.031 | 48  | 114 | 2.33E-06 |
| cg24520800 | RIOK1     | -5.775 | 59  | 103 | 2.33E-06 |
| cg27144162 | CNIH      | -5.372 | 92  | 70  | 2.33E-06 |
| cg08139833 | NDUFS8    | -5.876 | 106 | 56  | 2.36E-06 |
| cg12631737 | FUT4      | -3.747 | 82  | 80  | 2.36E-06 |
| cg23364287 | IHPK2     | -5.340 | 62  | 100 | 2.36E-06 |
| cg23407670 | MLH3      | -5.065 | 70  | 92  | 2.36E-06 |
| cg10740965 | CTNNBIP1  | -5.115 | 76  | 86  | 2.37E-06 |
| cg27318318 | ALX4      | -4.229 | 86  | 76  | 2.37E-06 |
| cg02959669 | ZNF256    | -4.671 | 112 | 50  | 2.43E-06 |
| cg09848074 | FLJ44186  | -0.541 | 81  | 81  | 2.43E-06 |
| cg21409722 | AKAP1     | -4.047 | 117 | 45  | 2.43E-06 |
| cg00950418 | SRPK2     | -4.730 | 94  | 68  | 2.44E-06 |
| cg25575065 | ARSA      | -4.032 | 82  | 80  | 2.44E-06 |
| cg26317056 | NNT       | -5.295 | 85  | 77  | 2.44E-06 |
| cg22572214 | SLC33A1   | -4.823 | 88  | 74  | 2.45E-06 |
| cg15035713 | TEP1      | -4.949 | 96  | 66  | 2.45E-06 |

|            |                  |        |     |     |          |
|------------|------------------|--------|-----|-----|----------|
| cg19195724 |                  | 1.386  | 77  | 85  | 2.45E-06 |
| cg18602919 | <i>NDN</i>       | 0.865  | 90  | 72  | 2.49E-06 |
| cg15034135 | <i>ADAMTS19</i>  | -5.125 | 65  | 97  | 2.50E-06 |
| cg19857538 | <i>TRUB2</i>     | -4.553 | 76  | 86  | 2.56E-06 |
| cg21288099 | <i>RRAS2</i>     | -6.094 | 61  | 101 | 2.56E-06 |
| cg12568776 | <i>EPB41L4B</i>  | -5.411 | 73  | 89  | 2.59E-06 |
| cg16312647 | <i>PPIB</i>      | -5.015 | 84  | 78  | 2.61E-06 |
| cg16824731 | <i>ILK</i>       | -4.642 | 82  | 80  | 2.61E-06 |
| cg17849194 | <i>SAS10</i>     | -5.455 | 38  | 124 | 2.61E-06 |
| cg18249244 | <i>ELP3</i>      | -5.337 | 43  | 119 | 2.61E-06 |
| cg21101222 | <i>ATOX1</i>     | -6.572 | 72  | 90  | 2.61E-06 |
| cg11053740 | <i>RAB2B</i>     | -4.695 | 111 | 51  | 2.62E-06 |
| cg18692273 | <i>TNNT2</i>     | 3.488  | 70  | 92  | 2.62E-06 |
| cg04166304 | <i>C14orf106</i> | -5.444 | 70  | 92  | 2.65E-06 |
| cg05013695 | <i>FRAT1</i>     | -5.482 | 61  | 101 | 2.65E-06 |
| cg06076054 | <i>C21orf91</i>  | -5.110 | 95  | 67  | 2.65E-06 |
| cg10421561 | <i>ANP32B</i>    | -4.577 | 46  | 116 | 2.65E-06 |
| cg11449935 | <i>TGIF2</i>     | -4.743 | 81  | 81  | 2.65E-06 |
| cg13801381 | <i>CCND2</i>     | -5.211 | 68  | 94  | 2.65E-06 |
| cg14047667 | <i>F13A1</i>     | -5.302 | 76  | 86  | 2.65E-06 |
| cg15779381 | <i>PFAAP5</i>    | -4.260 | 80  | 82  | 2.65E-06 |
| cg18721882 | <i>ARHGAP11A</i> | -4.815 | 110 | 52  | 2.65E-06 |
| cg20142224 | <i>DOK4</i>      | -5.181 | 97  | 65  | 2.65E-06 |
| cg21422622 | <i>RUTBC3</i>    | -4.071 | 45  | 117 | 2.65E-06 |
| cg26201579 | <i>MTO1</i>      | -5.383 | 94  | 68  | 2.65E-06 |
| cg00958517 | <i>ST3GAL2</i>   | -4.444 | 108 | 54  | 2.65E-06 |
| cg14377370 | <i>FLJ20280</i>  | -6.390 | 65  | 97  | 2.65E-06 |
| cg18456149 | <i>NAPB</i>      | -5.066 | 69  | 93  | 2.65E-06 |
| cg00350702 | <i>ERGIC3</i>    | -4.972 | 50  | 112 | 2.66E-06 |
| cg00849368 | <i>ARSK</i>      | -5.264 | 53  | 109 | 2.66E-06 |
| cg05523254 | <i>MFN2</i>      | -5.651 | 99  | 63  | 2.66E-06 |
| cg13423076 | <i>CXXC1</i>     | -5.439 | 64  | 98  | 2.68E-06 |
| cg23790767 | <i>ELL3</i>      | -6.296 | 69  | 93  | 2.68E-06 |
| cg26787239 | <i>IL4</i>       | 3.073  | 58  | 104 | 2.68E-06 |
| cg06716436 | <i>EDG5</i>      | -5.139 | 105 | 57  | 2.69E-06 |
| cg04763192 | <i>C1orf88</i>   | -5.473 | 73  | 89  | 2.74E-06 |
| cg22963452 | <i>IFITM1</i>    | 1.915  | 54  | 108 | 2.74E-06 |
| cg23979923 | <i>CIB1</i>      | -5.126 | 98  | 64  | 2.74E-06 |
| cg01798443 | <i>RPSA</i>      | -4.600 | 84  | 78  | 2.75E-06 |
| cg21063899 | <i>SCEL</i>      | -0.590 | 70  | 92  | 2.75E-06 |
| cg23687960 | <i>GGH</i>       | -5.993 | 118 | 44  | 2.79E-06 |
| cg02516388 | <i>FLJ20920</i>  | -5.089 | 64  | 98  | 2.80E-06 |
| cg04482110 | <i>TMEM106A</i>  | -4.176 | 58  | 104 | 2.80E-06 |
| cg04614380 | <i>SEMA3F</i>    | -6.451 | 62  | 100 | 2.85E-06 |
| cg13851211 | <i>ADCY7</i>     | 3.830  | 73  | 89  | 2.86E-06 |
| cg27153400 | <i>ISOC2</i>     | -6.129 | 125 | 37  | 2.86E-06 |
| cg03807314 | <i>MAP3K8</i>    | -4.883 | 106 | 56  | 2.87E-06 |
| cg00661202 | <i>CHCHD4</i>    | -5.842 | 90  | 72  | 2.89E-06 |
| cg02238747 | <i>KIAA0690</i>  | -2.744 | 88  | 74  | 2.89E-06 |
| cg11474075 | <i>TTC5</i>      | -5.068 | 63  | 99  | 2.89E-06 |
| cg17644867 | <i>FOS</i>       | -4.927 | 53  | 109 | 2.89E-06 |
| cg12157010 | <i>RASSF3</i>    | -4.832 | 101 | 61  | 2.91E-06 |
| cg19557537 | <i>CYP39A1</i>   | -4.967 | 78  | 84  | 2.94E-06 |
| cg25329939 | <i>RAP2A</i>     | -4.772 | 68  | 94  | 2.94E-06 |
| cg07195622 | <i>SRRM2</i>     | -4.237 | 82  | 80  | 2.94E-06 |

|            |                  |        |     |     |          |
|------------|------------------|--------|-----|-----|----------|
| cg11096640 | <i>ACTR3B</i>    | -4.958 | 64  | 98  | 2.94E-06 |
| cg15271594 | <i>RPL29</i>     | -4.478 | 77  | 85  | 2.94E-06 |
| cg16778903 | <i>BRUNOL6</i>   | -4.188 | 51  | 111 | 2.94E-06 |
| cg17058777 | <i>FLJ20625</i>  | -4.589 | 85  | 77  | 2.96E-06 |
| cg12570787 | <i>LOC133957</i> | -4.341 | 65  | 97  | 2.97E-06 |
| cg20629089 | <i>SAMD4A</i>    | -4.903 | 74  | 88  | 2.97E-06 |
| cg23272214 | <i>PCBP3</i>     | 1.841  | 66  | 96  | 2.97E-06 |
| cg14037413 | <i>ZNF143</i>    | -5.206 | 112 | 50  | 2.98E-06 |
| cg19383689 | <i>WSB1</i>      | -4.959 | 59  | 103 | 2.99E-06 |
| cg04177705 | <i>C3orf38</i>   | -5.364 | 52  | 110 | 3.01E-06 |
| cg20159072 | <i>SLC25A20</i>  | -5.125 | 81  | 81  | 3.01E-06 |
| cg08899632 | <i>ZFP64</i>     | -5.451 | 63  | 99  | 3.04E-06 |
| cg26336277 | <i>FYTDD1</i>    | -3.618 | 27  | 135 | 3.04E-06 |
| cg10957200 | <i>HSPA14</i>    | -5.354 | 94  | 68  | 3.05E-06 |
| cg06307422 | <i>RNF111</i>    | -5.441 | 82  | 80  | 3.05E-06 |
| cg12914657 | <i>GIMAP1</i>    | -2.718 | 90  | 72  | 3.05E-06 |
| cg22459359 | <i>ZMYM6</i>     | -6.793 | 96  | 66  | 3.05E-06 |
| cg21542094 | <i>PFKFB3</i>    | -4.834 | 97  | 65  | 3.07E-06 |
| cg16606185 | <i>C21orf33</i>  | -4.973 | 103 | 59  | 3.09E-06 |
| cg06682978 | <i>CAP2</i>      | -6.167 | 90  | 72  | 3.09E-06 |
| cg07240721 | <i>HINT3</i>     | -3.996 | 65  | 97  | 3.09E-06 |
| cg08747889 | <i>PTK7</i>      | -4.869 | 102 | 60  | 3.09E-06 |
| cg19905251 | <i>SLIT3</i>     | -4.767 | 95  | 67  | 3.09E-06 |
| cg22308759 | <i>ZNF161</i>    | -5.145 | 73  | 89  | 3.10E-06 |
| cg09221326 | <i>DYNLT1</i>    | -4.916 | 80  | 82  | 3.14E-06 |
| cg11890956 | <i>DSCR2</i>     | -5.665 | 57  | 105 | 3.14E-06 |
| cg19899621 | <i>ZNF561</i>    | -3.638 | 80  | 82  | 3.14E-06 |
| cg21166555 | <i>MAD1L1</i>    | -4.846 | 64  | 98  | 3.14E-06 |
| cg19432894 | <i>DNAJA1</i>    | -5.509 | 68  | 94  | 3.16E-06 |
| cg23786576 | <i>ATPAF1</i>    | -4.968 | 83  | 79  | 3.17E-06 |
| cg19552482 | <i>ZNF691</i>    | -4.854 | 57  | 105 | 3.19E-06 |
| cg03332970 | <i>ESAM</i>      | -5.203 | 49  | 113 | 3.21E-06 |
| cg03439805 | <i>CORO1C</i>    | -4.336 | 94  | 68  | 3.23E-06 |
| cg07210490 | <i>SMARCD1</i>   | -4.778 | 69  | 93  | 3.24E-06 |
| cg09092161 | <i>AK1</i>       | -5.252 | 79  | 83  | 3.24E-06 |
| cg09255666 | <i>ZNF281</i>    | -6.484 | 97  | 65  | 3.24E-06 |
| cg22378065 | <i>PLAGL1</i>    | 0.795  | 91  | 71  | 3.24E-06 |
| cg16282101 | <i>FAHD2A</i>    | -5.062 | 80  | 82  | 3.26E-06 |
| cg20349695 | <i>FUT10</i>     | -4.861 | 69  | 93  | 3.26E-06 |
| cg24252723 | <i>CNNM2</i>     | -5.955 | 113 | 49  | 3.26E-06 |
| cg04454391 | <i>NDUFAB1</i>   | -5.878 | 59  | 103 | 3.28E-06 |
| cg07295034 | <i>SMG1</i>      | -4.525 | 85  | 77  | 3.29E-06 |
| cg10966500 | <i>TCHP</i>      | -5.317 | 61  | 101 | 3.29E-06 |
| cg16160720 | <i>RASA1</i>     | -4.582 | 76  | 86  | 3.38E-06 |
| cg22230395 | <i>C5orf3</i>    | -5.179 | 84  | 78  | 3.38E-06 |
| cg10446968 | <i>SLC25A12</i>  | -5.132 | 46  | 116 | 3.38E-06 |
| cg24321030 | <i>LOC283537</i> | -5.780 | 44  | 118 | 3.41E-06 |
| cg06470552 | <i>CSPG6</i>     | -5.148 | 74  | 88  | 3.43E-06 |
| cg15305343 | <i>NSUN4</i>     | -6.210 | 45  | 117 | 3.44E-06 |
| cg23311549 | <i>MLF2</i>      | -4.633 | 86  | 76  | 3.48E-06 |
| cg12902719 | <i>LIMD1</i>     | -5.388 | 64  | 98  | 3.50E-06 |
| cg02364038 | <i>PTBP1</i>     | -5.075 | 91  | 71  | 3.54E-06 |
| cg07459264 | <i>NECAP2</i>    | -3.924 | 96  | 66  | 3.54E-06 |
| cg13342625 | <i>EBNA1BP2</i>  | -5.775 | 99  | 63  | 3.56E-06 |
| cg15100639 | <i>BAT5</i>      | -5.228 | 55  | 107 | 3.56E-06 |

|            |                 |        |     |     |          |
|------------|-----------------|--------|-----|-----|----------|
| cg21478222 | <i>ELK4</i>     | -4.896 | 111 | 51  | 3.56E-06 |
| cg12650011 | <i>TSPAN12</i>  | -4.780 | 83  | 79  | 3.56E-06 |
| cg09264112 | <i>GCHFR</i>    | -5.612 | 115 | 47  | 3.58E-06 |
| cg00725143 | <i>NPEPPS</i>   | -4.734 | 73  | 89  | 3.59E-06 |
| cg23137254 | <i>RNPC1</i>    | -5.595 | 66  | 96  | 3.59E-06 |
| cg05807768 | <i>ST7L</i>     | -4.815 | 61  | 101 | 3.60E-06 |
| cg17691309 | <i>TPM2</i>     | -6.237 | 78  | 84  | 3.60E-06 |
| cg26524263 | <i>KLK13</i>    | -4.101 | 74  | 88  | 3.60E-06 |
| cg17074212 | <i>ZNF215</i>   | -3.329 | 68  | 94  | 3.60E-06 |
| cg12346515 | <i>AMACR</i>    | -4.395 | 79  | 83  | 3.65E-06 |
| cg17454897 | <i>ADAMTS10</i> | -5.432 | 50  | 112 | 3.65E-06 |
| cg17881637 | <i>MRPL40</i>   | -5.032 | 72  | 90  | 3.65E-06 |
| cg18022193 | <i>C19orf22</i> | -5.335 | 80  | 82  | 3.65E-06 |
| cg23528708 | <i>C6orf79</i>  | -4.282 | 88  | 74  | 3.65E-06 |
| cg12813922 | <i>RAB3GAP1</i> | -5.179 | 71  | 91  | 3.66E-06 |
| cg21939482 | <i>MGC12966</i> | -4.420 | 97  | 65  | 3.68E-06 |
| cg26394737 | <i>ABHD4</i>    | -4.368 | 55  | 107 | 3.68E-06 |
| cg08661227 | <i>TAGLN2</i>   | -6.488 | 91  | 71  | 3.68E-06 |
| cg03759077 | <i>ARL6IP6</i>  | -4.721 | 66  | 96  | 3.70E-06 |
| cg21270593 | <i>PEG10</i>    | 5.122  | 55  | 107 | 3.70E-06 |
| cg00231140 | <i>ACAA2</i>    | -4.865 | 93  | 69  | 3.70E-06 |
| cg19941758 | <i>MDS025</i>   | -5.653 | 66  | 96  | 3.74E-06 |
| cg22631642 | <i>POLR2J2</i>  | -6.817 | 83  | 79  | 3.75E-06 |
| cg14343062 | <i>ERCC6</i>    | -4.968 | 66  | 96  | 3.75E-06 |
| cg15757271 | <i>WNT5A</i>    | -5.036 | 70  | 92  | 3.83E-06 |
| cg23066879 | <i>BRAF</i>     | -4.878 | 96  | 66  | 3.83E-06 |
| cg27610250 | <i>LOC91137</i> | -5.864 | 95  | 67  | 3.85E-06 |
| cg10544564 | <i>IGSF4B</i>   | -4.669 | 97  | 65  | 3.85E-06 |
| cg08725962 | <i>ARL10</i>    | -6.216 | 69  | 93  | 3.87E-06 |
| cg00830393 | <i>LRIG1</i>    | -5.110 | 105 | 57  | 3.87E-06 |
| cg05959392 | <i>C10orf32</i> | -4.874 | 46  | 116 | 3.87E-06 |
| cg09667226 | <i>KLF5</i>     | -4.793 | 79  | 83  | 3.87E-06 |
| cg12483860 | <i>TNIP1</i>    | -4.524 | 74  | 88  | 3.87E-06 |
| cg27074297 | <i>SOS1</i>     | -5.982 | 60  | 102 | 3.87E-06 |
| cg27337148 | <i>CAMK1G</i>   | -1.563 | 62  | 100 | 3.90E-06 |
| cg05451974 | <i>C20orf35</i> | -6.105 | 80  | 82  | 3.90E-06 |
| cg11648289 | <i>EN2</i>      | -4.870 | 89  | 73  | 3.90E-06 |
| cg15827295 | <i>LYSMD1</i>   | -5.194 | 59  | 103 | 3.90E-06 |
| cg20776317 | <i>SNAPC4</i>   | 2.530  | 72  | 90  | 3.91E-06 |
| cg00426963 | <i>KIF27</i>    | -4.853 | 56  | 106 | 3.91E-06 |
| cg01820777 | <i>MICAL-L2</i> | -4.113 | 100 | 62  | 3.91E-06 |
| cg04185893 | <i>PTBP2</i>    | -5.710 | 67  | 95  | 3.91E-06 |
| cg09431062 | <i>SH3GLB2</i>  | -5.786 | 85  | 77  | 3.91E-06 |
| cg11560403 | <i>TMEM81</i>   | 4.307  | 74  | 88  | 3.91E-06 |
| cg13791589 | <i>SLC45A3</i>  | -5.297 | 104 | 58  | 3.91E-06 |
| cg15994781 | <i>TOMM70A</i>  | -4.889 | 94  | 68  | 3.91E-06 |
| cg24497270 | <i>CGI-69</i>   | -6.059 | 65  | 97  | 3.91E-06 |
| cg08555612 | <i>PROK2</i>    | -4.425 | 79  | 83  | 3.91E-06 |
| cg27138584 | <i>KCNK12</i>   | -3.639 | 64  | 98  | 3.91E-06 |
| cg26041297 | <i>SCGB1D2</i>  | -0.326 | 61  | 101 | 3.92E-06 |
| cg19723775 | <i>HNRPH1</i>   | -5.977 | 75  | 87  | 3.94E-06 |
| cg22325715 | <i>CNTD</i>     | 3.765  | 83  | 79  | 3.94E-06 |
| cg26259610 | <i>PDAP1</i>    | -4.796 | 56  | 106 | 3.95E-06 |
| cg23333420 | <i>OBFC1</i>    | -5.932 | 75  | 87  | 3.95E-06 |
| cg00522316 | <i>KHSRP</i>    | -4.321 | 93  | 69  | 3.96E-06 |

|            |                 |        |     |     |          |
|------------|-----------------|--------|-----|-----|----------|
| cg11710560 | <i>KRTAP9-3</i> | 2.455  | 82  | 80  | 3.97E-06 |
| cg13554114 | <i>TERF1</i>    | -4.862 | 98  | 64  | 3.97E-06 |
| cg16060664 | <i>AP3M2</i>    | -6.073 | 51  | 111 | 3.97E-06 |
| cg02863237 | <i>RBM17</i>    | -5.618 | 85  | 77  | 4.00E-06 |
| cg23653008 | <i>CHFR</i>     | -4.685 | 89  | 73  | 4.03E-06 |
| cg26052367 | <i>GANC</i>     | -4.662 | 94  | 68  | 4.07E-06 |
| cg10065130 | <i>COG5</i>     | -5.521 | 93  | 69  | 4.08E-06 |
| cg15293750 | <i>DNMT2</i>    | -5.676 | 102 | 60  | 4.08E-06 |
| cg18755204 | <i>FAM45A</i>   | -5.299 | 56  | 106 | 4.08E-06 |
| cg26534508 | <i>GPR137B</i>  | -5.021 | 98  | 64  | 4.08E-06 |
| cg07899425 | <i>GSR</i>      | -5.170 | 85  | 77  | 4.14E-06 |
| cg10392768 | <i>ALOXE3</i>   | -4.706 | 85  | 77  | 4.14E-06 |
| cg14694232 | <i>TRIM26</i>   | -5.024 | 81  | 81  | 4.14E-06 |
| cg18996334 | <i>C19orf15</i> | -4.947 | 90  | 72  | 4.14E-06 |
| cg19324027 | <i>MRPL53</i>   | -4.289 | 91  | 71  | 4.14E-06 |
| cg22734480 | <i>ABHD8</i>    | -5.010 | 82  | 80  | 4.14E-06 |
| cg24170535 | <i>C6orf69</i>  | -4.652 | 105 | 57  | 4.14E-06 |
| cg26506209 | <i>ATP6V1E1</i> | -4.525 | 111 | 51  | 4.14E-06 |
| cg12575751 | <i>NUCB2</i>    | -5.569 | 104 | 58  | 4.16E-06 |
| cg10035303 | <i>TRPC4AP</i>  | -1.889 | 82  | 80  | 4.19E-06 |
| cg19911362 | <i>USP8</i>     | -4.650 | 87  | 75  | 4.19E-06 |
| cg21240812 | <i>TSNARE1</i>  | -5.049 | 82  | 80  | 4.19E-06 |
| cg20669525 | <i>GPAA1</i>    | -5.748 | 85  | 77  | 4.19E-06 |
| cg13877915 | <i>ZNF132</i>   | -5.267 | 87  | 75  | 4.23E-06 |
| cg27650175 | <i>DAB2IP</i>   | -6.428 | 66  | 96  | 4.25E-06 |
| cg17091770 | <i>STYX</i>     | -5.274 | 75  | 87  | 4.27E-06 |
| cg03939688 | <i>KLF4</i>     | -4.996 | 70  | 92  | 4.28E-06 |
| cg12628062 | <i>TBPIP</i>    | -5.137 | 87  | 75  | 4.28E-06 |
| cg23957424 | <i>TRAF6</i>    | -4.843 | 87  | 75  | 4.30E-06 |
| cg15423613 | <i>KCTD7</i>    | -5.148 | 99  | 63  | 4.31E-06 |
| cg17994910 | <i>FLJ20972</i> | 0.045  | 80  | 78  | 4.32E-06 |
| cg17329518 | <i>WDR4</i>     | -5.571 | 88  | 74  | 4.33E-06 |
| cg27512828 | <i>UVRAG</i>    | -4.362 | 110 | 52  | 4.33E-06 |
| cg09664442 | <i>ERICH1</i>   | -5.997 | 72  | 90  | 4.36E-06 |
| cg02832245 | <i>EXOSC9</i>   | -4.624 | 78  | 84  | 4.36E-06 |
| cg07865790 | <i>IKIP</i>     | -5.540 | 57  | 105 | 4.36E-06 |
| cg07959896 | <i>GEMIN6</i>   | -5.109 | 97  | 65  | 4.36E-06 |
| cg21228284 | <i>TXNL4B</i>   | -4.554 | 55  | 107 | 4.36E-06 |
| cg15229026 | <i>UBADC1</i>   | -3.993 | 88  | 74  | 4.37E-06 |
| cg16047482 | <i>WDHD1</i>    | -5.892 | 88  | 74  | 4.37E-06 |
| cg07764959 | <i>SLC43A1</i>  | -5.119 | 88  | 74  | 4.39E-06 |
| cg01712016 | <i>HDAC11</i>   | -5.437 | 64  | 98  | 4.40E-06 |
| cg07433344 | <i>HSD17B8</i>  | -6.497 | 87  | 75  | 4.41E-06 |
| cg08617916 | <i>RASSF5</i>   | -4.479 | 87  | 75  | 4.47E-06 |
| cg19355919 | <i>MRO</i>      | -4.587 | 81  | 81  | 4.52E-06 |
| cg03966406 | <i>ITPR2</i>    | -4.352 | 68  | 94  | 4.55E-06 |
| cg16418684 | <i>VWCE</i>     | -4.436 | 86  | 76  | 4.55E-06 |
| cg17029151 | <i>CHMP4C</i>   | -4.216 | 89  | 73  | 4.56E-06 |
| cg01880404 | <i>XRCC1</i>    | -4.684 | 89  | 73  | 4.57E-06 |
| cg15810744 | <i>CORO1B</i>   | -4.829 | 74  | 88  | 4.58E-06 |
| cg22190090 | <i>PIP5K2B</i>  | -5.388 | 69  | 93  | 4.59E-06 |
| cg07093046 | <i>MTR</i>      | -6.089 | 90  | 72  | 4.65E-06 |
| cg00677811 | <i>CCM2</i>     | -4.694 | 64  | 98  | 4.69E-06 |
| cg16237595 | <i>RNF41</i>    | -5.472 | 103 | 59  | 4.71E-06 |
| cg16253168 | <i>NOL7</i>     | -5.129 | 71  | 91  | 4.71E-06 |

|            |                  |        |     |     |          |
|------------|------------------|--------|-----|-----|----------|
| cg11473104 | <i>NUDT15</i>    | -0.721 | 87  | 75  | 4.72E-06 |
| cg09890200 | <i>PRKRA</i>     | -4.938 | 67  | 95  | 4.74E-06 |
| cg04391736 | <i>NIP7</i>      | -5.883 | 100 | 62  | 4.74E-06 |
| cg06557606 | <i>ATP6V1H</i>   | -4.140 | 76  | 86  | 4.74E-06 |
| cg17751867 | <i>GOLPH3</i>    | -5.935 | 67  | 95  | 4.75E-06 |
| cg26910651 | <i>PPP2CB</i>    | -6.146 | 65  | 97  | 4.78E-06 |
| cg03054529 | <i>SCRN1</i>     | 1.258  | 63  | 99  | 4.82E-06 |
| cg10583382 | <i>IMMP1L</i>    | -5.204 | 30  | 132 | 4.82E-06 |
| cg26045220 | <i>KIAA1324</i>  | -4.720 | 69  | 93  | 4.82E-06 |
| cg17504464 | <i>AK7</i>       | -4.843 | 57  | 105 | 4.86E-06 |
| cg14830952 | <i>E2F5</i>      | -6.000 | 75  | 87  | 4.89E-06 |
| cg25999867 | <i>LOC112937</i> | -4.656 | 71  | 91  | 4.89E-06 |
| cg02962299 | <i>KIN</i>       | -6.404 | 51  | 111 | 4.89E-06 |
| cg00262415 | <i>PUSL1</i>     | -5.104 | 47  | 115 | 4.90E-06 |
| cg09396217 | <i>ANGPT1</i>    | -0.942 | 71  | 91  | 4.90E-06 |
| cg22377142 | <i>C1orf85</i>   | -4.198 | 51  | 111 | 4.90E-06 |
| cg23240961 | <i>LOC56901</i>  | -6.423 | 68  | 94  | 4.90E-06 |
| cg22905968 | <i>SERTAD1</i>   | -4.174 | 91  | 71  | 4.93E-06 |
| cg17140815 | <i>ATP6V1F</i>   | -4.972 | 114 | 48  | 4.94E-06 |
| cg20328328 | <i>CALM1</i>     | -5.197 | 91  | 71  | 4.94E-06 |
| cg22178085 | <i>LKAP</i>      | -5.059 | 43  | 119 | 4.96E-06 |
| cg01226883 | <i>MTHFR</i>     | -4.817 | 82  | 80  | 4.96E-06 |
| cg04017769 | <i>TACC1</i>     | -6.574 | 67  | 95  | 4.96E-06 |
| cg07816442 | <i>CD3EAP</i>    | -5.454 | 52  | 110 | 4.96E-06 |
| cg03985657 | <i>C1orf2</i>    | -5.522 | 93  | 69  | 4.98E-06 |
| cg06899802 | <i>CSNK1A1</i>   | -5.861 | 61  | 101 | 5.05E-06 |
| cg17050972 | <i>HIST1H2AJ</i> | -2.836 | 76  | 86  | 5.05E-06 |
| cg19570317 | <i>MTA2</i>      | -5.578 | 56  | 106 | 5.10E-06 |
| cg24805239 | <i>DFNA5</i>     | -3.674 | 78  | 84  | 5.10E-06 |
| cg25811820 | <i>POFUT1</i>    | -4.382 | 83  | 79  | 5.10E-06 |
| cg18665023 | <i>ATP5O</i>     | -4.832 | 119 | 43  | 5.10E-06 |
| cg16218377 | <i>GPIAP1</i>    | -6.163 | 62  | 100 | 5.10E-06 |
| cg12335708 | <i>DPP4</i>      | -1.877 | 66  | 96  | 5.12E-06 |
| cg03490115 | <i>ZNHIT4</i>    | -4.918 | 65  | 97  | 5.12E-06 |
| cg25658178 | <i>CCND3</i>     | -5.022 | 89  | 73  | 5.12E-06 |
| cg19559392 | <i>MORN2</i>     | -5.002 | 59  | 103 | 5.13E-06 |
| cg05588972 | <i>C1orf89</i>   | -4.261 | 55  | 107 | 5.14E-06 |
| cg18452324 | <i>MFNG</i>      | -4.368 | 100 | 62  | 5.14E-06 |
| cg17524624 | <i>GSTK1</i>     | -3.841 | 57  | 105 | 5.14E-06 |
| cg02278165 | <i>COX7A2L</i>   | -5.161 | 50  | 112 | 5.19E-06 |
| cg07399355 | <i>MUC1</i>      | -4.184 | 75  | 87  | 5.19E-06 |
| cg10413342 | <i>MRPL21</i>    | -5.291 | 70  | 92  | 5.19E-06 |
| cg22127491 | <i>NDUFC1</i>    | -4.894 | 92  | 70  | 5.19E-06 |
| cg26071823 | <i>WDR23</i>     | -4.190 | 57  | 105 | 5.19E-06 |
| cg18895155 | <i>ZNF498</i>    | -5.797 | 61  | 101 | 5.21E-06 |
| cg04281268 | <i>HSP90AA1</i>  | -5.442 | 84  | 78  | 5.22E-06 |
| cg14694952 | <i>HD</i>        | -5.578 | 116 | 46  | 5.24E-06 |
| cg17114257 | <i>FCHSD2</i>    | -5.772 | 87  | 75  | 5.24E-06 |
| cg21908116 | <i>LRRC1</i>     | -5.740 | 48  | 114 | 5.24E-06 |
| cg21440587 | <i>AIF1</i>      | -2.255 | 88  | 74  | 5.27E-06 |
| cg23114866 | <i>NKX2-2</i>    | -4.089 | 68  | 94  | 5.27E-06 |
| cg27441551 | <i>DPP3</i>      | -5.439 | 81  | 81  | 5.27E-06 |
| cg21893220 | <i>SMC2L1</i>    | -6.015 | 92  | 70  | 5.28E-06 |
| cg04270788 | <i>GTF2B</i>     | -4.667 | 66  | 96  | 5.28E-06 |
| cg03161112 | <i>ZNF24</i>     | -4.587 | 83  | 79  | 5.29E-06 |

|            |                  |        |     |     |          |
|------------|------------------|--------|-----|-----|----------|
| cg06487986 | <i>PER3</i>      | -5.550 | 75  | 87  | 5.29E-06 |
| cg07126839 | <i>FAM100B</i>   | -5.436 | 93  | 69  | 5.29E-06 |
| cg00223950 | <i>RBAF600</i>   | -4.227 | 55  | 107 | 5.33E-06 |
| cg25283297 | <i>GNAS</i>      | 1.241  | 74  | 88  | 5.33E-06 |
| cg20176532 | <i>ZNF256</i>    | -4.649 | 59  | 103 | 5.33E-06 |
| cg22722802 | <i>FLJ39599</i>  | -4.503 | 92  | 70  | 5.33E-06 |
| cg12874092 | <i>VIM</i>       | -5.964 | 75  | 87  | 5.34E-06 |
| cg05210526 | <i>PGM1</i>      | -5.699 | 79  | 83  | 5.38E-06 |
| cg05915281 | <i>IRF1</i>      | -5.327 | 45  | 117 | 5.38E-06 |
| cg13047892 | <i>MEOX2</i>     | -4.361 | 92  | 70  | 5.38E-06 |
| cg27091233 | <i>BAT3</i>      | -5.533 | 88  | 74  | 5.39E-06 |
| cg08790550 | <i>LOC112714</i> | 4.747  | 60  | 102 | 5.39E-06 |
| cg26471445 | <i>GBA2</i>      | -5.851 | 106 | 56  | 5.39E-06 |
| cg20021244 | <i>APBB3</i>     | -6.411 | 52  | 110 | 5.42E-06 |
| cg04585992 | <i>TRAPPC6B</i>  | -4.469 | 75  | 87  | 5.46E-06 |
| cg06038049 | <i>CPSF3L</i>    | -6.340 | 105 | 57  | 5.49E-06 |
| cg11039072 | <i>FLJ20582</i>  | -4.693 | 82  | 80  | 5.49E-06 |
| cg05157725 | <i>COL21A1</i>   | -2.094 | 92  | 70  | 5.52E-06 |
| cg15118204 | <i>SIRT7</i>     | -1.994 | 95  | 67  | 5.59E-06 |
| cg09869042 | <i>C22orf18</i>  | -4.991 | 67  | 95  | 5.59E-06 |
| cg02942159 | <i>RPS6</i>      | -5.487 | 57  | 105 | 5.69E-06 |
| cg05243815 | <i>STRAP</i>     | -5.720 | 54  | 108 | 5.69E-06 |
| cg05499853 | <i>C10orf97</i>  | -5.509 | 59  | 103 | 5.69E-06 |
| cg10527457 | <i>ECT2</i>      | -6.033 | 81  | 81  | 5.69E-06 |
| cg12788471 | <i>ARPC5L</i>    | -6.007 | 85  | 77  | 5.69E-06 |
| cg15319076 | <i>DCTN6</i>     | -5.143 | 49  | 113 | 5.69E-06 |
| cg20456055 | <i>ABCB8</i>     | -5.084 | 39  | 123 | 5.69E-06 |
| cg21416602 | <i>ECD</i>       | -5.711 | 110 | 52  | 5.69E-06 |
| cg04916911 | <i>NTS</i>       | -3.612 | 72  | 90  | 5.70E-06 |
| cg12082615 | <i>SETDB1</i>    | -4.448 | 109 | 53  | 5.70E-06 |
| cg16339185 | <i>SGOL1</i>     | -5.822 | 112 | 50  | 5.70E-06 |
| cg19234509 | <i>BCAS2</i>     | -5.505 | 64  | 98  | 5.70E-06 |
| cg22103585 | <i>CCNT1</i>     | -5.876 | 109 | 53  | 5.70E-06 |
| cg14191109 | <i>SLC25A16</i>  | -4.142 | 56  | 106 | 5.73E-06 |
| cg22778180 | <i>C12orf47</i>  | -4.779 | 84  | 78  | 5.74E-06 |
| cg05462826 | <i>ABI2</i>      | -4.683 | 87  | 75  | 5.76E-06 |
| cg19875216 | <i>SRPRB</i>     | -6.636 | 74  | 88  | 5.76E-06 |
| cg17095753 | <i>BRAF</i>      | -5.541 | 84  | 78  | 5.77E-06 |
| cg26197220 | <i>TSC22D1</i>   | -6.292 | 71  | 91  | 5.77E-06 |
| cg01851208 | <i>C10orf58</i>  | -3.774 | 35  | 127 | 5.78E-06 |
| cg01966465 | <i>RPIB9</i>     | -4.895 | 102 | 60  | 5.79E-06 |
| cg03930474 | <i>ING4</i>      | -4.653 | 103 | 59  | 5.80E-06 |
| cg05492605 | <i>PPP1R8</i>    | -5.607 | 77  | 85  | 5.80E-06 |
| cg08205655 | <i>USP18</i>     | -4.236 | 86  | 76  | 5.80E-06 |
| cg26932976 | <i>KIAA0664</i>  | -5.827 | 116 | 46  | 5.80E-06 |
| cg01497501 | <i>ZFAND2A</i>   | -6.280 | 66  | 96  | 5.82E-06 |
| cg04779191 | <i>CIRH1A</i>    | -4.708 | 77  | 85  | 5.84E-06 |
| cg05641961 | <i>CIB1</i>      | -5.369 | 94  | 68  | 5.85E-06 |
| cg04413397 | <i>NMNAT1</i>    | -4.982 | 61  | 101 | 5.91E-06 |
| cg20109151 | <i>NIPSNAP3A</i> | -5.488 | 78  | 84  | 5.93E-06 |
| cg16579101 | <i>NOL1</i>      | -5.030 | 50  | 112 | 5.95E-06 |
| cg20567721 | <i>C16orf60</i>  | -3.085 | 73  | 89  | 5.96E-06 |
| cg22913584 | <i>SSBP2</i>     | -7.033 | 67  | 95  | 5.96E-06 |
| cg03804568 | <i>CBX7</i>      | -5.219 | 100 | 62  | 5.97E-06 |
| cg14221171 | <i>TAC1</i>      | -2.611 | 107 | 55  | 5.97E-06 |

|            |                 |        |     |     |          |
|------------|-----------------|--------|-----|-----|----------|
| cg06883149 | <i>C18orf24</i> | -4.702 | 60  | 102 | 5.97E-06 |
| cg08142684 | <i>TCP1</i>     | -5.008 | 90  | 72  | 5.97E-06 |
| cg00646492 | <i>GSTO1</i>    | -3.498 | 73  | 89  | 6.02E-06 |
| cg15211655 | <i>OSBPL1A</i>  | -5.097 | 85  | 77  | 6.05E-06 |
| cg08813236 | <i>PIGF</i>     | -4.693 | 79  | 83  | 6.05E-06 |
| cg01291404 | <i>COL2A1</i>   | -4.421 | 90  | 72  | 6.05E-06 |
| cg08164900 | <i>PDZD8</i>    | -5.611 | 65  | 97  | 6.06E-06 |
| cg15589156 | <i>RAB3IL1</i>  | -4.456 | 70  | 92  | 6.07E-06 |
| cg26628634 | <i>NME7</i>     | -4.539 | 52  | 110 | 6.07E-06 |
| cg10797195 | <i>TOE1</i>     | -3.715 | 72  | 90  | 6.11E-06 |
| cg11654620 | <i>ECGF1</i>    | -5.890 | 91  | 71  | 6.11E-06 |
| cg16475089 | <i>ZNF451</i>   | -6.393 | 72  | 90  | 6.11E-06 |
| cg23092072 | <i>AFF1</i>     | -5.404 | 66  | 96  | 6.11E-06 |
| cg00655307 | <i>ESR1</i>     | -4.012 | 90  | 72  | 6.15E-06 |
| cg11034784 | <i>MTERFD2</i>  | -5.016 | 84  | 78  | 6.15E-06 |
| cg15039399 | <i>CDK2AP2</i>  | -6.557 | 95  | 67  | 6.15E-06 |
| cg15056107 | <i>NUP133</i>   | -4.954 | 103 | 59  | 6.15E-06 |
| cg23043438 | <i>TEX10</i>    | -6.090 | 65  | 97  | 6.15E-06 |
| cg26787505 | <i>TLCD1</i>    | -5.976 | 74  | 88  | 6.15E-06 |
| cg08284180 | <i>WDR42A</i>   | -5.881 | 48  | 114 | 6.16E-06 |
| cg11237817 | <i>KIR3DL3</i>  | 1.232  | 83  | 79  | 6.16E-06 |
| cg05181565 | <i>SSU72</i>    | -5.780 | 52  | 110 | 6.17E-06 |
| cg19522332 | <i>PIK3CA</i>   | -3.634 | 103 | 59  | 6.17E-06 |
| cg16762195 | <i>LGP2</i>     | -4.830 | 102 | 60  | 6.18E-06 |
| cg21879981 | <i>EPC1</i>     | -4.635 | 46  | 116 | 6.18E-06 |
| cg06461769 | <i>TWSG1</i>    | -5.535 | 61  | 101 | 6.20E-06 |
| cg12345724 | <i>CDCA4</i>    | -5.301 | 102 | 60  | 6.20E-06 |
| cg25132078 | <i>PFDN1</i>    | -5.049 | 89  | 73  | 6.20E-06 |
| cg15165084 | <i>GRAMD3</i>   | -5.508 | 69  | 93  | 6.22E-06 |
| cg16778148 | <i>KCNQ1</i>    | 3.426  | 69  | 93  | 6.22E-06 |
| cg11680236 | <i>NME6</i>     | -4.755 | 70  | 92  | 6.24E-06 |
| cg20587543 | <i>ABAT</i>     | -4.548 | 86  | 76  | 6.24E-06 |
| cg14205126 | <i>TMEM9B</i>   | -4.108 | 118 | 44  | 6.24E-06 |
| cg26606064 | <i>EI24</i>     | -1.010 | 100 | 62  | 6.24E-06 |
| cg21086464 | <i>PAK1</i>     | -4.879 | 50  | 112 | 6.28E-06 |
| cg02279071 | <i>MLH1</i>     | -5.957 | 78  | 84  | 6.30E-06 |
| cg27193335 | <i>EIF1B</i>    | -5.527 | 71  | 91  | 6.30E-06 |
| cg02126638 | <i>LRRC57</i>   | -5.458 | 79  | 83  | 6.33E-06 |
| cg02097636 | <i>PAFAH1B3</i> | -6.255 | 88  | 74  | 6.39E-06 |
| cg04261665 | <i>C12orf52</i> | -4.638 | 72  | 90  | 6.39E-06 |
| cg05086873 | <i>RIC8A</i>    | -5.405 | 47  | 115 | 6.39E-06 |
| cg07313155 | <i>THRA</i>     | -3.919 | 86  | 76  | 6.39E-06 |
| cg08849126 | <i>GPRC5A</i>   | -4.386 | 92  | 70  | 6.39E-06 |
| cg12467864 | <i>PRC1</i>     | -6.569 | 93  | 69  | 6.39E-06 |
| cg17079378 | <i>RAD54L</i>   | -6.146 | 52  | 110 | 6.39E-06 |
| cg21096502 | <i>CHCHD2</i>   | -4.907 | 64  | 98  | 6.39E-06 |
| cg23096553 | <i>KCNMB4</i>   | -5.787 | 76  | 86  | 6.39E-06 |
| cg25083781 | <i>HM13</i>     | -5.007 | 65  | 97  | 6.39E-06 |
| cg02453591 | <i>FARSLB</i>   | -4.033 | 34  | 128 | 6.43E-06 |
| cg05845178 | <i>IL17RC</i>   | -5.496 | 95  | 67  | 6.43E-06 |
| cg15225105 | <i>SAC3D1</i>   | -4.714 | 87  | 75  | 6.43E-06 |
| cg15568167 | <i>SAMD10</i>   | -5.746 | 61  | 101 | 6.43E-06 |
| cg24685926 | <i>MDP-1</i>    | -4.393 | 87  | 75  | 6.43E-06 |
| cg26516954 | <i>B3GNTL1</i>  | -6.113 | 110 | 52  | 6.43E-06 |
| cg05592434 | <i>RPS13</i>    | -1.784 | 67  | 95  | 6.48E-06 |

|            |                  |        |     |     |          |
|------------|------------------|--------|-----|-----|----------|
| cg07973461 | <i>BAGE</i>      | 2.577  | 98  | 64  | 6.50E-06 |
| cg01015879 | <i>RDX</i>       | -4.526 | 111 | 51  | 6.54E-06 |
| cg03062665 | <i>CALM1</i>     | -6.626 | 106 | 56  | 6.54E-06 |
| cg04099673 | <i>WDR7</i>      | -5.440 | 109 | 53  | 6.56E-06 |
| cg26897054 | <i>DEDD2</i>     | -4.101 | 76  | 86  | 6.56E-06 |
| cg07490776 | <i>AP3M2</i>     | -6.386 | 62  | 100 | 6.57E-06 |
| cg12392669 | <i>CHCHD2</i>    | -4.302 | 107 | 55  | 6.57E-06 |
| cg01693108 | <i>SRPK1</i>     | -5.349 | 88  | 74  | 6.57E-06 |
| cg02975142 | <i>FLCN</i>      | -4.817 | 95  | 67  | 6.57E-06 |
| cg10735116 | <i>GPR89A</i>    | -6.058 | 92  | 70  | 6.57E-06 |
| cg19207856 | <i>DSCR5</i>     | -4.895 | 59  | 103 | 6.57E-06 |
| cg10145369 | <i>DAD1</i>      | -6.325 | 80  | 82  | 6.60E-06 |
| cg22579849 | <i>DCTN3</i>     | -4.581 | 83  | 79  | 6.60E-06 |
| cg16016951 | <i>DUT</i>       | -5.730 | 56  | 106 | 6.68E-06 |
| cg20721467 | <i>MYST4</i>     | 0.903  | 62  | 100 | 6.68E-06 |
| cg10689889 | <i>MAF</i>       | -6.305 | 66  | 96  | 6.71E-06 |
| cg12738007 | <i>MRPL16</i>    | -6.419 | 58  | 104 | 6.72E-06 |
| cg21942546 | <i>ABHD11</i>    | 4.029  | 84  | 78  | 6.73E-06 |
| cg03275186 | <i>COPS8</i>     | -4.464 | 59  | 103 | 6.76E-06 |
| cg15364303 | <i>ROR1</i>      | -4.165 | 111 | 51  | 6.76E-06 |
| cg21927363 | <i>C9orf93</i>   | -2.813 | 92  | 70  | 6.76E-06 |
| cg02549910 | <i>FLJ13946</i>  | -5.489 | 114 | 48  | 6.79E-06 |
| cg05375800 | <i>WDR31</i>     | -4.456 | 90  | 72  | 6.79E-06 |
| cg10414058 | <i>HDAC3</i>     | -2.594 | 70  | 92  | 6.79E-06 |
| cg05289701 | <i>C12orf11</i>  | -4.043 | 86  | 76  | 6.81E-06 |
| cg06586599 | <i>MCOLN1</i>    | -5.228 | 63  | 99  | 6.85E-06 |
| cg19783114 | <i>TP73</i>      | -6.466 | 53  | 109 | 6.85E-06 |
| cg10474368 | <i>SPCS2</i>     | -6.132 | 46  | 116 | 6.88E-06 |
| cg22016818 | <i>TULP3</i>     | -5.498 | 76  | 86  | 6.89E-06 |
| cg25229706 | <i>SAMD8</i>     | -4.236 | 82  | 80  | 6.92E-06 |
| cg06642617 | <i>CCT7</i>      | -6.555 | 47  | 115 | 6.92E-06 |
| cg01657408 | <i>FLJ31951</i>  | -4.337 | 82  | 80  | 6.94E-06 |
| cg02318535 | <i>PPM1E</i>     | 1.306  | 69  | 93  | 6.94E-06 |
| cg23862908 | <i>C8orf37</i>   | -5.107 | 80  | 82  | 6.94E-06 |
| cg15929201 | <i>FLJ11193</i>  | -4.582 | 55  | 107 | 6.94E-06 |
| cg23333306 | <i>CDC42EP4</i>  | -5.539 | 90  | 72  | 6.94E-06 |
| cg27284019 | <i>DDX20</i>     | -4.540 | 98  | 64  | 6.97E-06 |
| cg10906552 | <i>IL1RAP</i>    | -5.173 | 73  | 89  | 6.99E-06 |
| cg13917394 | <i>CCNB2</i>     | -5.521 | 72  | 90  | 6.99E-06 |
| cg20951821 | <i>ENC1</i>      | -5.113 | 80  | 82  | 6.99E-06 |
| cg23865067 | <i>ARPP-19</i>   | -4.252 | 52  | 110 | 6.99E-06 |
| cg09174741 | <i>THSD1</i>     | 2.820  | 55  | 107 | 7.02E-06 |
| cg09781594 | <i>LOC339789</i> | 2.187  | 34  | 128 | 7.02E-06 |
| cg24088408 | <i>E2F1</i>      | -1.048 | 109 | 53  | 7.05E-06 |
| cg20986134 | <i>LMNB1</i>     | -4.868 | 79  | 83  | 7.05E-06 |
| cg23263923 | <i>TNFSF7</i>    | -4.589 | 74  | 88  | 7.05E-06 |
| cg01738944 | <i>SLC35E2</i>   | -5.094 | 62  | 100 | 7.07E-06 |
| cg09650667 | <i>COPB2</i>     | -5.699 | 88  | 74  | 7.07E-06 |
| cg12584034 | <i>RPL21</i>     | -3.595 | 67  | 95  | 7.07E-06 |
| cg08935243 | <i>CETN3</i>     | -5.727 | 65  | 97  | 7.11E-06 |
| cg00405677 | <i>HAND1</i>     | -3.493 | 85  | 77  | 7.21E-06 |
| cg12975220 | <i>MEIS1</i>     | -5.020 | 75  | 87  | 7.24E-06 |
| cg16435601 | <i>FALZ</i>      | -5.403 | 59  | 103 | 7.24E-06 |
| cg00519627 | <i>CORO7</i>     | -5.980 | 70  | 92  | 7.25E-06 |
| cg03278960 | <i>C16orf57</i>  | -5.413 | 55  | 107 | 7.25E-06 |

|            |                  |        |     |     |          |
|------------|------------------|--------|-----|-----|----------|
| cg08151470 | <i>UBE4B</i>     | -0.049 | 58  | 104 | 7.26E-06 |
| cg12927153 | <i>PTGS1</i>     | -5.501 | 95  | 67  | 7.26E-06 |
| cg23993660 | <i>PINK1</i>     | -4.485 | 80  | 82  | 7.28E-06 |
| cg01765473 | <i>ATAD1</i>     | -5.877 | 86  | 76  | 7.29E-06 |
| cg05610379 | <i>C10orf86</i>  | -5.697 | 70  | 92  | 7.31E-06 |
| cg18962105 | <i>RBM4B</i>     | -4.636 | 65  | 97  | 7.32E-06 |
| cg13260633 | <i>CBR4</i>      | -6.067 | 79  | 83  | 7.34E-06 |
| cg07314549 | <i>MGC16943</i>  | -4.383 | 49  | 113 | 7.35E-06 |
| cg15484019 | <i>KIAA0103</i>  | -4.806 | 75  | 87  | 7.36E-06 |
| cg02447314 | <i>POLI</i>      | -5.302 | 86  | 76  | 7.39E-06 |
| cg13383490 | <i>TSG101</i>    | -4.820 | 72  | 90  | 7.39E-06 |
| cg09685104 | <i>C18orf19</i>  | -6.867 | 83  | 79  | 7.44E-06 |
| cg14106085 | <i>FOXD2</i>     | -3.132 | 59  | 103 | 7.44E-06 |
| cg11116440 | <i>C9orf74</i>   | -4.541 | 69  | 93  | 7.46E-06 |
| cg13237906 | <i>SLC26A2</i>   | -6.152 | 74  | 88  | 7.46E-06 |
| cg21548788 | <i>CCNI</i>      | -5.284 | 82  | 80  | 7.46E-06 |
| cg23074747 | <i>C9orf72</i>   | -6.403 | 55  | 107 | 7.46E-06 |
| cg25378769 | <i>C3orf37</i>   | -5.721 | 73  | 89  | 7.46E-06 |
| cg24826867 | <i>IRF8</i>      | -4.671 | 78  | 84  | 7.47E-06 |
| cg12792157 | <i>MYCBP</i>     | -5.822 | 45  | 117 | 7.52E-06 |
| cg08638395 | <i>XPR1</i>      | -5.321 | 87  | 75  | 7.52E-06 |
| cg14550007 | <i>SCMH1</i>     | -6.638 | 60  | 102 | 7.52E-06 |
| cg25505974 | <i>C21orf59</i>  | -5.853 | 110 | 52  | 7.54E-06 |
| cg07008350 | <i>TCEB3C</i>    | 2.861  | 63  | 99  | 7.57E-06 |
| cg07179770 | <i>C16orf44</i>  | -5.563 | 100 | 62  | 7.57E-06 |
| cg14094063 | <i>BRAF</i>      | -5.951 | 48  | 114 | 7.57E-06 |
| cg14850181 | <i>MPST</i>      | -5.312 | 84  | 78  | 7.59E-06 |
| cg15778350 | <i>CDCA1</i>     | -4.744 | 61  | 101 | 7.62E-06 |
| cg04733989 | <i>NAGA</i>      | -5.743 | 78  | 84  | 7.63E-06 |
| cg10609615 | <i>TRAP1</i>     | -4.670 | 67  | 95  | 7.64E-06 |
| cg09848198 | <i>EEA1</i>      | -4.617 | 81  | 81  | 7.70E-06 |
| cg11061603 | <i>RPS10</i>     | -5.237 | 102 | 60  | 7.73E-06 |
| cg07699440 | <i>FAH</i>       | -5.561 | 77  | 85  | 7.74E-06 |
| cg22717127 | <i>CBWD2</i>     | -5.816 | 84  | 78  | 7.75E-06 |
| cg23894539 | <i>STARD3</i>    | -5.814 | 98  | 64  | 7.75E-06 |
| cg00782854 | <i>BCL2L1</i>    | -5.073 | 51  | 111 | 7.77E-06 |
| cg06759215 | <i>DBF4B</i>     | -4.995 | 75  | 87  | 7.80E-06 |
| cg12572545 | <i>SC4MOL</i>    | -5.659 | 66  | 96  | 7.80E-06 |
| cg12648263 | <i>PIGH</i>      | -5.837 | 95  | 67  | 7.80E-06 |
| cg15492003 | <i>SEC61B</i>    | -6.254 | 97  | 65  | 7.80E-06 |
| cg18825999 | <i>PNRC2</i>     | -5.568 | 63  | 99  | 7.80E-06 |
| cg06626655 | <i>RSPO1</i>     | -3.564 | 93  | 69  | 7.83E-06 |
| cg27458888 | <i>UBE3A</i>     | -4.603 | 80  | 82  | 7.83E-06 |
| cg17071536 | <i>SEC10L1</i>   | -5.280 | 79  | 83  | 7.83E-06 |
| cg05702633 | <i>PPP1R15B</i>  | -5.535 | 58  | 104 | 7.87E-06 |
| cg08626653 | <i>FLJ37538</i>  | 3.119  | 85  | 77  | 7.90E-06 |
| cg13436996 | <i>UGT2B11</i>   | 2.437  | 85  | 77  | 7.90E-06 |
| cg00568128 | <i>C10orf118</i> | -3.168 | 78  | 84  | 7.94E-06 |
| cg13436343 | <i>PUM1</i>      | -5.606 | 78  | 84  | 7.94E-06 |
| cg07259382 | <i>43891</i>     | 2.522  | 56  | 106 | 7.99E-06 |
| cg02150709 | <i>PPIH</i>      | -5.454 | 75  | 87  | 7.99E-06 |
| cg02765045 | <i>PCBP2</i>     | -5.821 | 74  | 88  | 7.99E-06 |
| cg14323928 | <i>TRPM1</i>     | 2.711  | 57  | 105 | 8.00E-06 |
| cg24450631 | <i>IGF2BP2</i>   | -2.012 | 82  | 80  | 8.00E-06 |
| cg10962407 | <i>ALS2CR15</i>  | -5.872 | 93  | 69  | 8.01E-06 |

|            |                 |        |     |     |          |
|------------|-----------------|--------|-----|-----|----------|
| cg13170032 | <i>HLX1</i>     | -3.821 | 96  | 66  | 8.01E-06 |
| cg16821394 | <i>NDFIP1</i>   | -5.358 | 51  | 111 | 8.01E-06 |
| cg00053292 | <i>CCDC44</i>   | -4.981 | 84  | 78  | 8.06E-06 |
| cg01924993 | <i>H2AFX</i>    | -5.627 | 100 | 62  | 8.06E-06 |
| cg03878377 | <i>C15orf15</i> | -5.669 | 98  | 64  | 8.06E-06 |
| cg03976567 | <i>C6orf199</i> | -4.221 | 64  | 98  | 8.06E-06 |
| cg21091629 | <i>FRAG1</i>    | -4.828 | 74  | 88  | 8.06E-06 |
| cg06994793 | <i>PRO1580</i>  | -5.701 | 107 | 55  | 8.11E-06 |
| cg16299616 | <i>NOMO2</i>    | -4.338 | 75  | 87  | 8.11E-06 |
| cg24324379 | <i>IDH1</i>     | -3.957 | 119 | 43  | 8.19E-06 |
| cg07421682 | <i>PCSK6</i>    | 3.056  | 100 | 62  | 8.24E-06 |
| cg05467106 | <i>ZNF689</i>   | -4.868 | 52  | 110 | 8.34E-06 |
| cg10399369 | <i>CABC1</i>    | -6.062 | 66  | 96  | 8.42E-06 |
| cg12288365 | <i>KCTD7</i>    | -6.177 | 115 | 47  | 8.44E-06 |
| cg14353516 | <i>HDLBP</i>    | -2.928 | 112 | 50  | 8.44E-06 |
| cg22826936 | <i>ULK2</i>     | -4.850 | 51  | 111 | 8.44E-06 |
| cg21222430 | <i>CDKN1A</i>   | -4.515 | 96  | 66  | 8.46E-06 |
| cg03455874 | <i>BRI3BP</i>   | -4.569 | 72  | 90  | 8.46E-06 |
| cg15883761 | <i>MUS81</i>    | -5.117 | 66  | 96  | 8.46E-06 |
| cg09783309 | <i>DNAL4</i>    | -5.201 | 84  | 78  | 8.51E-06 |
| cg01245656 | <i>ASNS</i>     | -5.260 | 76  | 86  | 8.53E-06 |
| cg00877964 | <i>SLC1A4</i>   | -4.878 | 58  | 104 | 8.55E-06 |
| cg12062464 | <i>PCAF</i>     | -5.875 | 96  | 66  | 8.56E-06 |
| cg06632528 | <i>NUDT22</i>   | -5.112 | 35  | 127 | 8.56E-06 |
| cg18915437 | <i>USP15</i>    | -6.430 | 68  | 94  | 8.56E-06 |
| cg07518362 | <i>NOTCH2</i>   | -5.457 | 78  | 84  | 8.57E-06 |
| cg01191395 | <i>SAT2</i>     | -5.226 | 106 | 56  | 8.59E-06 |
| cg03712038 | <i>ZNF160</i>   | -5.889 | 65  | 97  | 8.59E-06 |
| cg15097876 | <i>PPA1</i>     | -5.278 | 79  | 83  | 8.59E-06 |
| cg23613305 | <i>FVT1</i>     | -5.610 | 48  | 114 | 8.59E-06 |
| cg25423402 | <i>IVNS1ABP</i> | -6.303 | 46  | 116 | 8.59E-06 |
| cg25786862 | <i>MUT</i>      | -4.408 | 91  | 71  | 8.59E-06 |
| cg25126052 | <i>INT4</i>     | -3.889 | 90  | 72  | 8.61E-06 |
| cg16763895 | <i>ILVBL</i>    | -4.618 | 99  | 63  | 8.61E-06 |
| cg26022315 | <i>SNF8</i>     | -4.946 | 105 | 57  | 8.61E-06 |
| cg07962051 | <i>TNKS</i>     | -3.710 | 81  | 81  | 8.67E-06 |
| cg19578398 | <i>PEO1</i>     | -2.946 | 116 | 46  | 8.67E-06 |
| cg12206093 | <i>FKSG44</i>   | -5.862 | 63  | 99  | 8.74E-06 |
| cg22710329 | <i>ANUBL1</i>   | -4.152 | 77  | 85  | 8.74E-06 |
| cg11681073 | <i>CUL1</i>     | -5.279 | 70  | 92  | 8.77E-06 |
| cg24485466 | <i>KIF14</i>    | -5.761 | 54  | 108 | 8.78E-06 |
| cg14101501 | <i>EHBP1</i>    | -5.196 | 30  | 132 | 8.84E-06 |
| cg05846716 | <i>PCSK2</i>    | -4.211 | 109 | 53  | 8.85E-06 |
| cg06840226 | <i>GPC1</i>     | -5.459 | 46  | 116 | 8.85E-06 |
| cg23181138 | <i>AGTPBP1</i>  | -5.979 | 68  | 94  | 8.85E-06 |
| cg01372605 | <i>C12orf62</i> | -5.480 | 56  | 106 | 8.86E-06 |
| cg12090388 | <i>RPL11</i>    | -4.028 | 91  | 71  | 8.86E-06 |
| cg02715140 | <i>CFL1</i>     | -5.480 | 55  | 107 | 8.89E-06 |
| cg19987840 | <i>NUDT6</i>    | -5.045 | 106 | 56  | 8.89E-06 |
| cg13713381 | <i>TMEM44</i>   | -5.799 | 52  | 110 | 8.91E-06 |
| cg20757758 | <i>ZMYND12</i>  | -5.281 | 89  | 73  | 8.93E-06 |
| cg00021527 | <i>TAF15</i>    | -4.863 | 71  | 91  | 8.94E-06 |
| cg13875807 | <i>JMJD2C</i>   | -3.532 | 39  | 123 | 8.94E-06 |
| cg16666456 | <i>LRRC40</i>   | -5.747 | 63  | 99  | 8.94E-06 |
| cg24219962 | <i>WBP4</i>     | -5.396 | 50  | 112 | 8.97E-06 |

|            |                  |        |     |     |          |
|------------|------------------|--------|-----|-----|----------|
| cg08347423 | <i>INVS</i>      | -5.291 | 41  | 121 | 9.04E-06 |
| cg07964538 | <i>CAV1</i>      | -5.180 | 95  | 67  | 9.08E-06 |
| cg09121849 | <i>SLC7A1</i>    | -6.201 | 70  | 92  | 9.08E-06 |
| cg27409012 | <i>UAP1</i>      | -5.894 | 73  | 89  | 9.08E-06 |
| cg20095338 | <i>NAP1L1</i>    | -3.444 | 85  | 77  | 9.08E-06 |
| cg21460081 | <i>HOXB4</i>     | -3.763 | 82  | 80  | 9.08E-06 |
| cg08400019 | <i>NSUN6</i>     | -4.532 | 110 | 52  | 9.10E-06 |
| cg10072995 | <i>NINJ1</i>     | -4.804 | 71  | 91  | 9.10E-06 |
| cg20484002 | <i>KRT25D</i>    | 1.459  | 104 | 58  | 9.10E-06 |
| cg09282338 | <i>NXT1</i>      | -4.698 | 73  | 89  | 9.11E-06 |
| cg27538954 | <i>ZCCHC7</i>    | -5.929 | 105 | 57  | 9.11E-06 |
| cg00819696 | <i>TIMELESS</i>  | -5.673 | 46  | 116 | 9.13E-06 |
| cg04862249 | <i>ZFP3</i>      | -4.518 | 106 | 56  | 9.13E-06 |
| cg07281640 | <i>C9orf6</i>    | -5.099 | 70  | 92  | 9.13E-06 |
| cg08553339 | <i>CRSP7</i>     | -6.361 | 93  | 69  | 9.13E-06 |
| cg13333141 | <i>BTG1</i>      | -6.023 | 34  | 128 | 9.13E-06 |
| cg19490266 | <i>JTB</i>       | -5.173 | 48  | 114 | 9.13E-06 |
| cg06334496 | <i>TMEM70</i>    | -4.757 | 84  | 78  | 9.15E-06 |
| cg07020407 | <i>PDCD6</i>     | -5.285 | 43  | 119 | 9.19E-06 |
| cg23434459 | <i>BCAP29</i>    | -4.994 | 56  | 106 | 9.20E-06 |
| cg20612559 | <i>SKIP</i>      | -5.461 | 61  | 101 | 9.21E-06 |
| cg07772309 | <i>NELF</i>      | -6.133 | 66  | 96  | 9.23E-06 |
| cg15253672 | <i>SPR</i>       | -4.967 | 85  | 77  | 9.23E-06 |
| cg02868306 | <i>RAB11B</i>    | -3.802 | 68  | 94  | 9.23E-06 |
| cg04590931 | <i>PHF15</i>     | -6.425 | 95  | 67  | 9.23E-06 |
| cg08643928 | <i>RALGPS2</i>   | -5.622 | 87  | 75  | 9.23E-06 |
| cg01716061 | <i>CDKN2B</i>    | -3.378 | 91  | 71  | 9.23E-06 |
| cg13946860 | <i>RPN2</i>      | -6.074 | 53  | 109 | 9.23E-06 |
| cg19526626 | <i>ZNF491</i>    | -5.261 | 63  | 99  | 9.23E-06 |
| cg27573806 | <i>LSM2</i>      | -4.877 | 105 | 57  | 9.23E-06 |
| cg03986968 | <i>AVEN</i>      | -3.481 | 119 | 43  | 9.26E-06 |
| cg03786772 | <i>C6orf166</i>  | -4.006 | 86  | 76  | 9.26E-06 |
| cg06818415 | <i>PHF1</i>      | -4.709 | 62  | 100 | 9.29E-06 |
| cg03242880 | <i>BTG4</i>      | 2.442  | 98  | 64  | 9.31E-06 |
| cg14527441 | <i>KHK</i>       | -5.094 | 90  | 72  | 9.31E-06 |
| cg11528101 | <i>MRPS24</i>    | -6.022 | 84  | 78  | 9.33E-06 |
| cg16721202 | <i>SP4</i>       | -4.083 | 35  | 127 | 9.34E-06 |
| cg23889021 | <i>CTDSP1</i>    | -4.782 | 69  | 93  | 9.34E-06 |
| cg12776163 | <i>44081</i>     | -5.420 | 108 | 54  | 9.37E-06 |
| cg16220802 | <i>MAP2K1IP1</i> | -5.528 | 104 | 58  | 9.37E-06 |
| cg17416608 | <i>RAB6IP2</i>   | -4.202 | 75  | 87  | 9.37E-06 |
| cg07330718 | <i>HYOU1</i>     | -4.962 | 71  | 91  | 9.38E-06 |
| cg20590849 | <i>MIF4GD</i>    | -6.096 | 73  | 89  | 9.38E-06 |
| cg03568718 | <i>TP73</i>      | 3.402  | 90  | 72  | 9.40E-06 |
| cg22169418 | <i>RBM21</i>     | -5.082 | 130 | 32  | 9.44E-06 |
| cg23752923 | <i>MCOLN3</i>    | -5.403 | 66  | 96  | 9.47E-06 |
| cg19023700 | <i>MKLN1</i>     | -5.186 | 106 | 56  | 9.48E-06 |
| cg24596576 | <i>FANCD2</i>    | -4.971 | 110 | 52  | 9.49E-06 |
| cg06765434 | <i>TXNL1</i>     | -4.516 | 53  | 109 | 9.50E-06 |
| cg22403851 | <i>PDIA6</i>     | -5.775 | 106 | 56  | 9.59E-06 |
| cg26461637 | <i>FAS</i>       | -6.395 | 53  | 109 | 9.59E-06 |
| cg06725035 | <i>PRMT2</i>     | -4.120 | 51  | 111 | 9.59E-06 |
| cg07775675 | <i>SPHK1</i>     | -4.311 | 69  | 93  | 9.59E-06 |
| cg00943950 | <i>UBE2B</i>     | -4.017 | 89  | 73  | 9.61E-06 |
| cg27478651 | <i>ACADM</i>     | -5.594 | 75  | 87  | 9.64E-06 |

|            |                  |        |     |     |          |
|------------|------------------|--------|-----|-----|----------|
| cg06150468 | <i>SNFT</i>      | -4.401 | 82  | 80  | 9.66E-06 |
| cg07273415 | <i>CYBASC3</i>   | -4.685 | 41  | 121 | 9.66E-06 |
| cg08332868 | <i>RBM19</i>     | -5.218 | 91  | 71  | 9.66E-06 |
| cg18201077 | <i>RSAD2</i>     | -4.509 | 88  | 74  | 9.66E-06 |
| cg26008464 | <i>SLC2A12</i>   | -5.334 | 72  | 90  | 9.66E-06 |
| cg26330371 | <i>LMAN1</i>     | -3.273 | 82  | 80  | 9.66E-06 |
| cg11356290 | <i>AZI2</i>      | -4.956 | 84  | 78  | 9.67E-06 |
| cg27173322 | <i>FADS1</i>     | -5.505 | 91  | 71  | 9.67E-06 |
| cg08584430 | <i>IHPK1</i>     | -6.408 | 95  | 67  | 9.68E-06 |
| cg03761560 | <i>DNAJB12</i>   | -5.413 | 78  | 84  | 9.77E-06 |
| cg07909527 | <i>NUBP2</i>     | -6.532 | 49  | 113 | 9.87E-06 |
| cg22153116 | <i>C9orf52</i>   | -4.898 | 65  | 97  | 9.87E-06 |
| cg03703325 | <i>HEMK1</i>     | -5.484 | 91  | 71  | 9.88E-06 |
| cg25902460 | <i>STRBP</i>     | -3.189 | 67  | 95  | 9.88E-06 |
| cg10948883 | <i>DDX41</i>     | -6.274 | 63  | 99  | 9.99E-06 |
| cg01868559 | <i>STRAP</i>     | -5.604 | 76  | 86  | 1.00E-05 |
| cg19072037 | <i>NAT10</i>     | -5.171 | 83  | 79  | 1.00E-05 |
| cg14572485 | <i>AMZ2</i>      | -5.575 | 52  | 110 | 1.00E-05 |
| cg06505666 | <i>FLJ40629</i>  | -5.300 | 111 | 51  | 1.00E-05 |
| cg22391400 | <i>SLK</i>       | -5.000 | 55  | 107 | 1.00E-05 |
| cg04626574 | <i>LOC402055</i> | -4.359 | 80  | 82  | 1.01E-05 |
| cg05507894 | <i>LOC201895</i> | -5.868 | 102 | 60  | 1.01E-05 |
| cg24003306 | <i>MRPL36</i>    | -5.013 | 41  | 121 | 1.01E-05 |
| cg01805784 | <i>PRR7</i>      | -5.754 | 79  | 83  | 1.02E-05 |
| cg19531713 | <i>BRCA1</i>     | -3.253 | 115 | 47  | 1.02E-05 |
| cg11884546 | <i>ITGAX</i>     | -3.043 | 70  | 92  | 1.03E-05 |
| cg10660136 | <i>MGC43122</i>  | -5.864 | 44  | 118 | 1.03E-05 |
| cg18986273 | <i>FAM53C</i>    | -3.250 | 58  | 103 | 1.03E-05 |
| cg10919329 | <i>SLC35A1</i>   | -5.405 | 114 | 48  | 1.03E-05 |
| cg15498283 | <i>TALDO1</i>    | -5.770 | 52  | 110 | 1.04E-05 |
| cg03919644 | <i>LRRIQ2</i>    | -4.755 | 84  | 78  | 1.04E-05 |
| cg10775273 | <i>CRYBA2</i>    | -5.897 | 92  | 70  | 1.04E-05 |
| cg06717104 | <i>TIMM23</i>    | -6.196 | 47  | 115 | 1.05E-05 |
| cg25922353 | <i>FUT8</i>      | 1.940  | 65  | 97  | 1.05E-05 |
| cg18418460 | <i>ULBP3</i>     | -6.318 | 59  | 103 | 1.06E-05 |
| cg21263196 | <i>BCAM</i>      | -4.667 | 80  | 82  | 1.07E-05 |
| cg12026394 | <i>ANP32B</i>    | -5.950 | 114 | 48  | 1.07E-05 |
| cg20235051 | <i>LOC388407</i> | -5.607 | 58  | 104 | 1.08E-05 |
| cg12452675 | <i>ACOX1</i>     | -5.641 | 55  | 107 | 1.09E-05 |
| cg05492270 | <i>RNF121</i>    | -4.004 | 136 | 26  | 1.09E-05 |
| cg19836283 | <i>ITGA11</i>    | -3.967 | 86  | 76  | 1.09E-05 |
| cg26021476 | <i>ENY2</i>      | -5.637 | 94  | 68  | 1.09E-05 |
| cg26793710 | <i>CDC73</i>     | -5.008 | 91  | 71  | 1.10E-05 |
| cg01457080 | <i>ANGEL1</i>    | -5.057 | 55  | 107 | 1.10E-05 |
| cg14887509 | <i>WASF2</i>     | -6.014 | 73  | 89  | 1.12E-05 |
| cg15555727 | <i>PYCRL</i>     | -3.682 | 70  | 92  | 1.12E-05 |
| cg23435440 | <i>HCAP-G</i>    | -3.525 | 89  | 73  | 1.12E-05 |
| cg03140096 | <i>FARSLA</i>    | -5.359 | 41  | 121 | 1.12E-05 |
| cg03846288 | <i>RNF111</i>    | -4.593 | 122 | 40  | 1.12E-05 |
| cg04350646 | <i>PSMA2</i>     | -5.498 | 61  | 101 | 1.12E-05 |
| cg08347960 | <i>SCN2A2</i>    | -2.275 | 58  | 92  | 1.12E-05 |
| cg26137790 | <i>ACAA2</i>     | -5.627 | 64  | 98  | 1.12E-05 |
| cg26347745 | <i>IFT122</i>    | -4.351 | 48  | 114 | 1.12E-05 |
| cg01044722 | <i>MYH10</i>     | -4.896 | 109 | 53  | 1.12E-05 |
| cg17388484 | <i>JUP</i>       | -4.510 | 107 | 55  | 1.12E-05 |

|            |                  |        |     |     |          |
|------------|------------------|--------|-----|-----|----------|
| cg25478603 | <i>ALDH1B1</i>   | -2.024 | 39  | 123 | 1.12E-05 |
| cg21650900 | <i>ARL4C</i>     | -5.959 | 85  | 77  | 1.12E-05 |
| cg22267176 | <i>TCTE3</i>     | -5.750 | 72  | 90  | 1.12E-05 |
| cg10604703 | <i>WDR5</i>      | -3.955 | 112 | 50  | 1.13E-05 |
| cg04648440 | <i>BRD3</i>      | -2.931 | 81  | 81  | 1.13E-05 |
| cg21307628 | <i>URB</i>       | 1.619  | 84  | 78  | 1.14E-05 |
| cg03396229 | <i>COL22A1</i>   | -4.064 | 68  | 94  | 1.15E-05 |
| cg10841258 | <i>CTTNBP2NL</i> | -2.384 | 82  | 80  | 1.15E-05 |
| cg13843773 | <i>MGC35043</i>  | -4.854 | 48  | 114 | 1.15E-05 |
| cg14700577 | <i>SCAP</i>      | -5.605 | 77  | 85  | 1.15E-05 |
| cg01447420 | <i>FEN1</i>      | -5.457 | 113 | 49  | 1.15E-05 |
| cg02914419 | <i>ASNA1</i>     | -4.164 | 56  | 106 | 1.15E-05 |
| cg11476211 | <i>PRKCE</i>     | -5.143 | 70  | 92  | 1.15E-05 |
| cg27583030 | <i>SLC25A4</i>   | -2.799 | 95  | 67  | 1.15E-05 |
| cg27507704 | <i>ETFDH</i>     | -6.430 | 53  | 109 | 1.16E-05 |
| cg02915261 | <i>LSR</i>       | -5.150 | 80  | 82  | 1.16E-05 |
| cg11093356 | <i>DDX19A</i>    | -5.162 | 96  | 66  | 1.16E-05 |
| cg01663295 | <i>PACS1</i>     | -3.138 | 50  | 112 | 1.17E-05 |
| cg17616707 | <i>ATP5B</i>     | -5.152 | 81  | 81  | 1.18E-05 |
| cg27613076 | <i>INPP5F</i>    | -4.288 | 85  | 77  | 1.18E-05 |
| cg03533811 | <i>HISPPD2A</i>  | 4.879  | 77  | 85  | 1.19E-05 |
| cg11064558 | <i>ZNF295</i>    | -5.602 | 43  | 119 | 1.19E-05 |
| cg17605847 | <i>PREB</i>      | -5.012 | 91  | 71  | 1.19E-05 |
| cg17815841 | <i>SCC-112</i>   | -5.289 | 69  | 93  | 1.19E-05 |
| cg17997329 | <i>MGC11332</i>  | -3.858 | 86  | 76  | 1.19E-05 |
| cg21600563 | <i>FBXO33</i>    | -5.723 | 78  | 84  | 1.19E-05 |
| cg24635866 | <i>CCT2</i>      | -5.824 | 47  | 115 | 1.19E-05 |
| cg01413314 | <i>IFRD2</i>     | -5.857 | 60  | 102 | 1.19E-05 |
| cg08797194 | <i>UGCGL2</i>    | -4.045 | 101 | 61  | 1.19E-05 |
| cg09085639 | <i>MRPL12</i>    | -4.395 | 103 | 59  | 1.19E-05 |
| cg17829314 | <i>C1orf122</i>  | -5.632 | 56  | 106 | 1.19E-05 |
| cg23998987 | <i>TBL3</i>      | -4.843 | 82  | 80  | 1.19E-05 |
| cg01994779 | <i>ZNRF1</i>     | -4.577 | 43  | 119 | 1.19E-05 |
| cg10289190 | <i>GRHPR</i>     | -5.191 | 61  | 101 | 1.20E-05 |
| cg18667426 | <i>C1orf85</i>   | -4.699 | 95  | 67  | 1.20E-05 |
| cg22582569 | <i>PPP2R1B</i>   | -4.244 | 69  | 93  | 1.20E-05 |
| cg23123694 | <i>SLC38A2</i>   | -6.194 | 116 | 46  | 1.21E-05 |
| cg03640568 | <i>DDX17</i>     | -5.364 | 79  | 83  | 1.21E-05 |
| cg06625811 | <i>KIFAP3</i>    | -5.057 | 55  | 107 | 1.21E-05 |
| cg12688043 | <i>MAP4</i>      | -4.345 | 51  | 111 | 1.21E-05 |
| cg26520371 | <i>M6PR</i>      | -4.550 | 63  | 99  | 1.21E-05 |
| cg00095674 | <i>PLEKHO1</i>   | -2.751 | 88  | 74  | 1.21E-05 |
| cg01746088 | <i>SFRS7</i>     | -4.898 | 40  | 122 | 1.21E-05 |
| cg24238205 | <i>FAM111A</i>   | -4.469 | 87  | 75  | 1.21E-05 |
| cg21443261 | <i>TRIM35</i>    | -4.783 | 38  | 124 | 1.22E-05 |
| cg23033866 | <i>MRPL12</i>    | -4.296 | 62  | 100 | 1.22E-05 |
| cg23738770 | <i>NFKB2</i>     | -5.311 | 92  | 70  | 1.22E-05 |
| cg25750404 | <i>VAMP1</i>     | -4.343 | 55  | 107 | 1.22E-05 |
| cg09515805 | <i>PGM2L1</i>    | -4.864 | 76  | 86  | 1.22E-05 |
| cg02141570 | <i>LOC348840</i> | -0.190 | 89  | 73  | 1.22E-05 |
| cg15477600 | <i>SDF2L1</i>    | -5.053 | 104 | 58  | 1.22E-05 |
| cg05294095 | <i>PSMD8</i>     | -5.926 | 57  | 105 | 1.22E-05 |
| cg10074513 | <i>FAM79A</i>    | -5.198 | 74  | 88  | 1.22E-05 |
| cg25243721 | <i>XRCC4</i>     | -4.424 | 83  | 79  | 1.22E-05 |
| cg13430425 | <i>ADSL</i>      | -5.195 | 89  | 73  | 1.23E-05 |

|            |                 |        |     |     |          |
|------------|-----------------|--------|-----|-----|----------|
| cg24642516 | <i>HYPE</i>     | -5.811 | 100 | 62  | 1.23E-05 |
| cg17804987 | <i>MAPKAPK3</i> | -6.364 | 61  | 101 | 1.23E-05 |
| cg08305742 | <i>LOC51315</i> | -4.525 | 118 | 44  | 1.24E-05 |
| cg00177698 | <i>PNPO</i>     | -4.285 | 88  | 74  | 1.24E-05 |
| cg00476577 | <i>ZNF217</i>   | -3.312 | 69  | 93  | 1.24E-05 |
| cg18936744 | <i>AK7</i>      | -4.438 | 49  | 113 | 1.24E-05 |
| cg03166779 | <i>ETV1</i>     | -4.989 | 60  | 102 | 1.24E-05 |
| cg15021531 | <i>DDIT3</i>    | -4.342 | 79  | 83  | 1.25E-05 |
| cg25599242 | <i>RARRES3</i>  | -3.643 | 91  | 71  | 1.25E-05 |
| cg08367026 | <i>C12orf47</i> | -5.281 | 74  | 88  | 1.25E-05 |
| cg24386906 | <i>SART2</i>    | -4.681 | 66  | 96  | 1.25E-05 |
| cg12503243 | <i>PRPF39</i>   | -3.293 | 62  | 100 | 1.25E-05 |
| cg04304927 | <i>SLC39A8</i>  | -5.798 | 92  | 70  | 1.26E-05 |
| cg07854244 | <i>IHPK2</i>    | -4.628 | 100 | 62  | 1.26E-05 |
| cg26478074 | <i>HSD17B12</i> | -4.705 | 70  | 92  | 1.27E-05 |
| cg21591452 | <i>TMEM105</i>  | 2.477  | 82  | 80  | 1.27E-05 |
| cg17186444 | <i>NDNL2</i>    | -5.415 | 90  | 72  | 1.28E-05 |
| cg24469803 | <i>POLR3A</i>   | -3.759 | 83  | 79  | 1.28E-05 |
| cg09615982 | <i>E4F1</i>     | -5.023 | 43  | 119 | 1.28E-05 |
| cg13704271 | <i>CCDC28B</i>  | -4.659 | 91  | 71  | 1.28E-05 |
| cg10449070 | <i>ALDH2</i>    | -5.225 | 95  | 67  | 1.28E-05 |
| cg26567442 | <i>PSMD6</i>    | -4.600 | 108 | 54  | 1.28E-05 |
| cg17018527 | <i>TM6SF1</i>   | -4.470 | 85  | 77  | 1.28E-05 |
| cg15683743 | <i>SPPL2A</i>   | -4.135 | 50  | 112 | 1.28E-05 |
| cg12871124 | <i>STARD4</i>   | -6.035 | 88  | 74  | 1.29E-05 |
| cg02718725 | <i>CNN3</i>     | -4.195 | 88  | 74  | 1.29E-05 |
| cg18896539 | <i>HTATIP</i>   | -5.315 | 109 | 53  | 1.29E-05 |
| cg26778807 | <i>WSB2</i>     | -6.282 | 74  | 88  | 1.29E-05 |
| cg10864501 | <i>POLDIP3</i>  | -3.352 | 47  | 115 | 1.29E-05 |
| cg25788012 | <i>EXOSC4</i>   | -6.138 | 85  | 77  | 1.29E-05 |
| cg22624926 | <i>PSMA6</i>    | -5.069 | 67  | 95  | 1.30E-05 |
| cg25437402 | <i>PICALM</i>   | -5.880 | 56  | 106 | 1.30E-05 |
| cg17441778 | <i>MYO7A</i>    | -3.882 | 103 | 59  | 1.30E-05 |
| cg17556578 | <i>RAB8B</i>    | -5.934 | 52  | 110 | 1.30E-05 |
| cg15796978 | <i>LHCGR</i>    | -3.153 | 68  | 94  | 1.31E-05 |
| cg17753124 | <i>IER2</i>     | 0.097  | 95  | 67  | 1.31E-05 |
| cg13683864 | <i>RPL14</i>    | -4.395 | 91  | 71  | 1.31E-05 |
| cg27497687 | <i>MED19</i>    | -4.730 | 97  | 65  | 1.32E-05 |
| cg17896097 | <i>ZBTB26</i>   | -4.773 | 48  | 114 | 1.32E-05 |
| cg08803144 | <i>ATIC</i>     | -4.843 | 117 | 45  | 1.32E-05 |
| cg12917695 | <i>HSPC268</i>  | -5.951 | 51  | 111 | 1.33E-05 |
| cg08157638 | <i>VANGL1</i>   | 2.358  | 106 | 56  | 1.33E-05 |
| cg03814826 | <i>YWHAH</i>    | -4.901 | 76  | 86  | 1.33E-05 |
| cg22190291 | <i>NBPF3</i>    | -5.818 | 72  | 90  | 1.33E-05 |
| cg12971958 | <i>PDCD6IP</i>  | -5.212 | 43  | 119 | 1.34E-05 |
| cg22609068 | <i>MGC3020</i>  | -4.896 | 62  | 100 | 1.34E-05 |
| cg17055145 | <i>MYO6</i>     | -5.381 | 45  | 117 | 1.34E-05 |
| cg21549639 | <i>TOMM40</i>   | -4.794 | 81  | 81  | 1.34E-05 |
| cg07686479 | <i>LMX1A</i>    | -3.502 | 85  | 77  | 1.34E-05 |
| cg22774127 | <i>COX10</i>    | -5.398 | 76  | 86  | 1.34E-05 |
| cg06838394 | <i>ARFGEF2</i>  | -3.593 | 115 | 47  | 1.34E-05 |
| cg03916787 | <i>RPL35</i>    | -3.410 | 89  | 73  | 1.35E-05 |
| cg05679521 | <i>MAP2K3</i>   | -4.038 | 129 | 33  | 1.35E-05 |
| cg09149294 | <i>ARRDC4</i>   | -5.410 | 91  | 71  | 1.35E-05 |
| cg24547948 | <i>ADPRHL2</i>  | -5.119 | 90  | 72  | 1.35E-05 |

|            |                 |        |     |     |          |
|------------|-----------------|--------|-----|-----|----------|
| cg24633648 | <i>MTAC2D1</i>  | -3.593 | 125 | 37  | 1.35E-05 |
| cg08918431 | <i>MASK-BP3</i> | -5.629 | 40  | 122 | 1.35E-05 |
| cg18678421 | <i>LENG8</i>    | -3.908 | 64  | 98  | 1.36E-05 |
| cg21053015 | <i>SYNGR1</i>   | -4.990 | 55  | 107 | 1.36E-05 |
| cg25985488 | <i>GALNTL4</i>  | -4.976 | 62  | 100 | 1.36E-05 |
| cg23905308 | <i>PER2</i>     | -5.586 | 84  | 78  | 1.36E-05 |
| cg09251995 | <i>JUND</i>     | -6.261 | 68  | 94  | 1.36E-05 |
| cg16993440 | <i>ZCCHC9</i>   | -4.541 | 70  | 92  | 1.36E-05 |
| cg20478514 | <i>SCCPDH</i>   | -5.694 | 39  | 123 | 1.36E-05 |
| cg10487127 | <i>ATXN1</i>    | -5.427 | 89  | 73  | 1.37E-05 |
| cg00873037 | <i>NEIL2</i>    | -5.129 | 76  | 86  | 1.37E-05 |
| cg05404787 | <i>FLJ25102</i> | 2.776  | 110 | 52  | 1.38E-05 |
| cg23838179 | <i>ZNF592</i>   | -5.240 | 42  | 120 | 1.38E-05 |
| cg19545851 | <i>NUDCD2</i>   | -5.504 | 103 | 59  | 1.38E-05 |
| cg27286107 | <i>CGGBP1</i>   | -5.533 | 63  | 99  | 1.38E-05 |
| cg04006554 | <i>ENPP5</i>    | -5.496 | 79  | 83  | 1.38E-05 |
| cg12085225 | <i>SETX</i>     | -6.142 | 78  | 84  | 1.39E-05 |
| cg17615007 | <i>ZNF134</i>   | -4.667 | 66  | 96  | 1.39E-05 |
| cg25559625 | <i>EDN1</i>     | -4.872 | 62  | 100 | 1.39E-05 |
| cg27032352 | <i>C21orf94</i> | -2.393 | 77  | 85  | 1.39E-05 |
| cg14859749 | <i>SF3A1</i>    | -5.820 | 67  | 95  | 1.39E-05 |
| cg10960946 | <i>UBE2I</i>    | -6.600 | 80  | 82  | 1.39E-05 |
| cg13656360 | <i>MLL</i>      | -3.925 | 85  | 77  | 1.39E-05 |
| cg21515744 | <i>GUK1</i>     | -4.789 | 102 | 60  | 1.39E-05 |
| cg24428042 | <i>ECHDC3</i>   | -5.266 | 133 | 29  | 1.39E-05 |
| cg15365950 | <i>KLHDC1</i>   | -5.410 | 55  | 107 | 1.40E-05 |
| cg26536164 | <i>RTP3</i>     | 3.078  | 75  | 87  | 1.40E-05 |
| cg01091448 | <i>AMACR</i>    | -5.597 | 64  | 98  | 1.40E-05 |
| cg16898150 | <i>CCBL1</i>    | -6.006 | 46  | 116 | 1.40E-05 |
| cg20616836 | <i>AES</i>      | 3.188  | 47  | 115 | 1.40E-05 |
| cg01679262 | <i>RANBP5</i>   | -1.286 | 96  | 66  | 1.40E-05 |
| cg05412136 | <i>CLTA</i>     | -4.547 | 85  | 77  | 1.40E-05 |
| cg20254231 | <i>WDR33</i>    | -4.244 | 95  | 67  | 1.40E-05 |
| cg02668729 | <i>CTPS</i>     | -5.394 | 79  | 83  | 1.41E-05 |
| cg13240311 | <i>PKIG</i>     | -4.299 | 58  | 104 | 1.41E-05 |
| cg02616808 | <i>UNC5A</i>    | -4.323 | 84  | 78  | 1.41E-05 |
| cg10524983 | <i>GYG1</i>     | -3.902 | 98  | 64  | 1.41E-05 |
| cg13789236 | <i>RFK</i>      | -4.135 | 124 | 38  | 1.41E-05 |
| cg22836153 | <i>LOX</i>      | -4.973 | 94  | 68  | 1.41E-05 |
| cg23700778 | <i>KIAA0895</i> | -5.655 | 120 | 42  | 1.41E-05 |
| cg00475955 | <i>C9orf114</i> | -5.765 | 67  | 95  | 1.41E-05 |
| cg17164520 | <i>CGB1</i>     | 1.171  | 54  | 108 | 1.42E-05 |
| cg02077793 | <i>CARM1</i>    | -3.351 | 61  | 101 | 1.42E-05 |
| cg14434255 | <i>ENTPD7</i>   | -4.323 | 103 | 59  | 1.43E-05 |
| cg14298379 | <i>MYLIP</i>    | -4.687 | 78  | 84  | 1.43E-05 |
| cg25457027 | <i>PROC</i>     | 3.511  | 92  | 70  | 1.43E-05 |
| cg01100784 | <i>MAPK8IP3</i> | -5.023 | 46  | 116 | 1.43E-05 |
| cg18641937 | <i>ITLN2</i>    | 2.358  | 74  | 88  | 1.43E-05 |
| cg15928446 | <i>MGC3121</i>  | -4.897 | 66  | 96  | 1.44E-05 |
| cg25558099 | <i>SMCR8</i>    | -3.973 | 63  | 99  | 1.44E-05 |
| cg01040759 | <i>ST3GAL5</i>  | -4.036 | 79  | 83  | 1.44E-05 |
| cg01990304 | <i>OPA3</i>     | -5.980 | 67  | 95  | 1.44E-05 |
| cg25402049 | <i>PRDM2</i>    | 2.311  | 83  | 79  | 1.45E-05 |
| cg02278071 | <i>DUSP18</i>   | -4.662 | 101 | 61  | 1.45E-05 |
| cg03366677 | <i>C14orf4</i>  | -6.305 | 66  | 96  | 1.45E-05 |

|            |                 |        |     |     |          |
|------------|-----------------|--------|-----|-----|----------|
| cg24242194 | <i>MDH2</i>     | -5.542 | 90  | 72  | 1.45E-05 |
| cg23996306 | <i>DARS</i>     | -4.832 | 99  | 63  | 1.45E-05 |
| cg10686044 | <i>SEL1L</i>    | -5.745 | 104 | 58  | 1.46E-05 |
| cg23957915 | <i>RCOR2</i>    | -5.561 | 92  | 70  | 1.46E-05 |
| cg24137081 | <i>IQCC</i>     | -5.827 | 104 | 58  | 1.46E-05 |
| cg01773061 | <i>LSM10</i>    | -5.173 | 99  | 63  | 1.46E-05 |
| cg08524221 | <i>ET</i>       | -3.625 | 80  | 82  | 1.46E-05 |
| cg10829134 | <i>ZA20D3</i>   | -5.997 | 60  | 102 | 1.46E-05 |
| cg11574758 | <i>C20orf19</i> | -4.663 | 80  | 82  | 1.46E-05 |
| cg13785207 | <i>RPS19BP1</i> | -5.057 | 85  | 77  | 1.46E-05 |
| cg14435640 | <i>AGPAT6</i>   | -5.189 | 50  | 112 | 1.46E-05 |
| cg15873715 | <i>DAB2</i>     | -4.310 | 67  | 95  | 1.46E-05 |
| cg20044189 | <i>SPRY4</i>    | -6.728 | 74  | 88  | 1.46E-05 |
| cg12940430 | <i>SRF</i>      | -4.256 | 39  | 123 | 1.46E-05 |
| cg23919568 | <i>FAM32A</i>   | -4.252 | 83  | 79  | 1.46E-05 |
| cg11653271 | <i>POLR3K</i>   | -5.392 | 65  | 97  | 1.48E-05 |
| cg14541311 | <i>MYH6</i>     | 1.207  | 101 | 61  | 1.48E-05 |
| cg08115510 | <i>AMOTL2</i>   | -4.377 | 87  | 75  | 1.48E-05 |
| cg09198463 | <i>ARL6IP2</i>  | -5.084 | 101 | 61  | 1.48E-05 |
| cg09378691 | <i>ZNF335</i>   | -5.075 | 92  | 70  | 1.49E-05 |
| cg19784449 | <i>WASF2</i>    | -4.129 | 79  | 83  | 1.49E-05 |
| cg01819863 | <i>EPC1</i>     | -6.748 | 86  | 76  | 1.50E-05 |
| cg03737135 | <i>HSPA14</i>   | -4.131 | 95  | 67  | 1.50E-05 |
| cg25459778 | <i>CRAMP1L</i>  | -5.853 | 64  | 98  | 1.51E-05 |
| cg00184884 | <i>SFI1</i>     | -5.746 | 79  | 83  | 1.51E-05 |
| cg02811755 | <i>AKAP10</i>   | -5.321 | 64  | 98  | 1.51E-05 |
| cg04049800 | <i>C1orf57</i>  | -5.560 | 36  | 126 | 1.51E-05 |
| cg08680102 | <i>GRPEL2</i>   | -5.467 | 87  | 75  | 1.51E-05 |
| cg15865742 | <i>SLC31A1</i>  | -2.362 | 113 | 49  | 1.51E-05 |
| cg18913951 | <i>TMEM45B</i>  | 4.043  | 103 | 59  | 1.51E-05 |
| cg26226968 | <i>SMARCAD1</i> | -5.302 | 57  | 105 | 1.51E-05 |
| cg11414046 | <i>BRAF</i>     | -5.501 | 43  | 119 | 1.52E-05 |
| cg07526069 | <i>GOT1</i>     | -4.949 | 56  | 106 | 1.52E-05 |
| cg17223189 | <i>CHMP2A</i>   | -5.592 | 52  | 110 | 1.52E-05 |
| cg13736875 | <i>UBE2C</i>    | -5.949 | 95  | 67  | 1.52E-05 |
| cg22769406 | <i>COX6B1</i>   | -5.101 | 74  | 88  | 1.52E-05 |
| cg03208093 | <i>ZNF248</i>   | -5.555 | 94  | 68  | 1.52E-05 |
| cg22734085 | <i>FLJ30277</i> | -5.671 | 67  | 95  | 1.53E-05 |
| cg20969242 | <i>GON4</i>     | -4.269 | 64  | 98  | 1.53E-05 |
| cg10568944 | <i>MUT</i>      | -3.717 | 49  | 113 | 1.53E-05 |
| cg26361928 | <i>G3BP</i>     | -5.338 | 42  | 120 | 1.54E-05 |
| cg22473095 | <i>RBBP9</i>    | -4.460 | 52  | 110 | 1.54E-05 |
| cg17329249 | <i>MAT2B</i>    | -4.914 | 65  | 97  | 1.54E-05 |
| cg21753834 | <i>TTC16</i>    | -4.798 | 77  | 85  | 1.54E-05 |
| cg05114625 | <i>CDC27</i>    | -5.456 | 81  | 81  | 1.55E-05 |
| cg00094851 | <i>KIF3C</i>    | -3.253 | 51  | 111 | 1.55E-05 |
| cg00973334 | <i>LASS5</i>    | -4.964 | 75  | 87  | 1.55E-05 |
| cg06421707 | <i>PYGB</i>     | -5.472 | 66  | 96  | 1.55E-05 |
| cg17509807 | <i>GTF3C2</i>   | -5.060 | 69  | 93  | 1.55E-05 |
| cg17759354 | <i>SLC12A3</i>  | 3.146  | 75  | 87  | 1.55E-05 |
| cg18865999 | <i>PCYOX1</i>   | -5.368 | 69  | 93  | 1.56E-05 |
| cg18797053 | <i>DNAJB2</i>   | -5.284 | 89  | 73  | 1.56E-05 |
| cg11856918 | <i>ATP6V1B2</i> | -5.795 | 44  | 118 | 1.56E-05 |
| cg14767877 | <i>PSAP</i>     | -5.940 | 53  | 109 | 1.56E-05 |
| cg20016845 | <i>CXXC1</i>    | -5.111 | 64  | 98  | 1.56E-05 |

|            |           |        |     |     |          |
|------------|-----------|--------|-----|-----|----------|
| cg00567749 | CSPG2     | -3.944 | 68  | 94  | 1.56E-05 |
| cg01021485 | CSNK1G1   | -6.047 | 55  | 107 | 1.56E-05 |
| cg08315277 | PKDREJ    | 3.912  | 81  | 81  | 1.56E-05 |
| cg09504352 | CDK4      | -5.741 | 72  | 90  | 1.56E-05 |
| cg12476968 | SLC12A6   | -3.029 | 53  | 109 | 1.56E-05 |
| cg22813220 | C1orf83   | -5.455 | 61  | 101 | 1.56E-05 |
| cg24941797 | CAPN10    | -6.537 | 52  | 110 | 1.56E-05 |
| cg05813084 | EFNA3     | -4.754 | 55  | 107 | 1.56E-05 |
| cg19125323 | SFRS2     | -6.431 | 99  | 63  | 1.56E-05 |
| cg01443067 | USP8      | -4.772 | 43  | 119 | 1.56E-05 |
| cg13741326 | TP53AP1   | -4.995 | 47  | 115 | 1.58E-05 |
| cg11237115 | KLHL24    | -4.802 | 71  | 91  | 1.58E-05 |
| cg17541425 | ABCF2     | -4.598 | 48  | 114 | 1.58E-05 |
| cg20389709 | KLF11     | -2.934 | 53  | 101 | 1.58E-05 |
| cg00430945 | LIN7B     | -3.563 | 76  | 86  | 1.58E-05 |
| cg09527021 | TADA1L    | -4.708 | 84  | 78  | 1.58E-05 |
| cg15560112 | MYBPC2    | -5.307 | 77  | 85  | 1.58E-05 |
| cg21197973 | PH-4      | -5.542 | 56  | 106 | 1.58E-05 |
| cg03160637 | DDB1      | -4.292 | 57  | 105 | 1.58E-05 |
| cg16382382 | TGFB3     | -6.542 | 91  | 71  | 1.59E-05 |
| cg10906135 | GLTSCR1   | 2.548  | 73  | 89  | 1.59E-05 |
| cg02917772 | CTH       | -4.137 | 68  | 94  | 1.59E-05 |
| cg12888961 | PCTK2     | -4.585 | 85  | 77  | 1.59E-05 |
| cg07220442 | NUP107    | -4.798 | 63  | 99  | 1.59E-05 |
| cg25909811 | KDEL2     | -5.694 | 83  | 79  | 1.60E-05 |
| cg25827112 | TESK2     | -5.315 | 94  | 68  | 1.60E-05 |
| cg25112044 | CDK7      | -5.089 | 90  | 72  | 1.60E-05 |
| cg24710886 | PUM1      | -4.574 | 102 | 60  | 1.60E-05 |
| cg14813406 | CDC14A    | -5.241 | 123 | 39  | 1.60E-05 |
| cg04316754 | MMP24     | -3.508 | 56  | 106 | 1.60E-05 |
| cg03550508 | SNRPD3    | -5.374 | 101 | 61  | 1.61E-05 |
| cg07818646 | FLJ11712  | -6.018 | 55  | 107 | 1.61E-05 |
| cg17846100 | MT        | -6.284 | 73  | 89  | 1.61E-05 |
| cg23026920 | TP53RK    | -5.714 | 54  | 108 | 1.61E-05 |
| cg17057072 | SMYD4     | -3.858 | 94  | 68  | 1.61E-05 |
| cg16645539 | SNAPC3    | -5.842 | 105 | 57  | 1.61E-05 |
| cg03848675 | FOXF2     | -4.196 | 77  | 85  | 1.61E-05 |
| cg09984370 | ZNF567    | -4.047 | 94  | 68  | 1.63E-05 |
| cg09543783 | FKRP      | 2.502  | 84  | 78  | 1.63E-05 |
| cg19510484 | METAP2    | -4.618 | 97  | 65  | 1.63E-05 |
| cg00129774 | CDK2      | -4.702 | 78  | 84  | 1.63E-05 |
| cg03494005 | FBXO24    | -5.612 | 58  | 104 | 1.63E-05 |
| cg05480532 | TMPRSS11A | 1.603  | 56  | 106 | 1.63E-05 |
| cg16241648 | ARPC1A    | -4.773 | 67  | 95  | 1.63E-05 |
| cg27114086 | YY1AP1    | -5.333 | 95  | 67  | 1.63E-05 |
| cg07874155 | CTNNA1    | -5.914 | 87  | 75  | 1.64E-05 |
| cg01522721 | CDC37     | -5.205 | 108 | 54  | 1.64E-05 |
| cg02646854 | C11orf2   | -4.506 | 49  | 113 | 1.64E-05 |
| cg10464585 | CNOT2     | -2.183 | 78  | 84  | 1.64E-05 |
| cg06449653 | HNRPR     | -5.844 | 49  | 113 | 1.64E-05 |
| cg25341653 | ELMO3     | 1.582  | 76  | 86  | 1.64E-05 |
| cg18555555 | FABP7     | 5.188  | 105 | 57  | 1.65E-05 |
| cg02323334 | PRDM10    | -6.009 | 93  | 69  | 1.66E-05 |
| cg11951446 | COX17     | -3.922 | 84  | 78  | 1.66E-05 |
| cg12113932 | C20orf18  | -4.262 | 49  | 113 | 1.66E-05 |

|            |                 |        |     |     |          |
|------------|-----------------|--------|-----|-----|----------|
| cg08069899 | <i>CCND2</i>    | -3.768 | 62  | 100 | 1.66E-05 |
| cg12276904 | <i>H1FX</i>     | -5.125 | 85  | 77  | 1.66E-05 |
| cg19836808 | <i>S100A7</i>   | -2.814 | 88  | 74  | 1.66E-05 |
| cg04490516 | <i>GBL</i>      | -3.737 | 95  | 67  | 1.66E-05 |
| cg00209951 | <i>DENND2C</i>  | -3.052 | 61  | 101 | 1.67E-05 |
| cg03154513 | <i>ID1</i>      | -5.213 | 94  | 68  | 1.67E-05 |
| cg24691578 | <i>CRY2</i>     | -5.111 | 97  | 65  | 1.67E-05 |
| cg05566397 | <i>MLL5</i>     | -5.692 | 90  | 72  | 1.68E-05 |
| cg09203961 | <i>HMGB1</i>    | -6.241 | 60  | 102 | 1.68E-05 |
| cg06061892 | <i>SNX5</i>     | -5.355 | 87  | 75  | 1.68E-05 |
| cg12185908 | <i>SGOL1</i>    | -4.992 | 47  | 115 | 1.68E-05 |
| cg02312170 | <i>BRWD2</i>    | -5.476 | 65  | 97  | 1.68E-05 |
| cg02709261 | <i>TOR3A</i>    | -5.220 | 98  | 64  | 1.68E-05 |
| cg06622725 | <i>PEX16</i>    | -6.812 | 78  | 84  | 1.68E-05 |
| cg17990871 | <i>SLC35E2</i>  | -4.221 | 53  | 109 | 1.68E-05 |
| cg18711066 | <i>NFATC3</i>   | -4.060 | 62  | 100 | 1.68E-05 |
| cg09643313 | <i>PPP1R9A</i>  | -2.685 | 77  | 85  | 1.69E-05 |
| cg14026971 | <i>MLSTD2</i>   | -4.511 | 44  | 118 | 1.70E-05 |
| cg04305913 | <i>GPSM1</i>    | 2.278  | 59  | 103 | 1.71E-05 |
| cg15044073 | <i>SWAP70</i>   | -4.420 | 78  | 84  | 1.71E-05 |
| cg10061496 | <i>HDAC11</i>   | -6.177 | 102 | 60  | 1.71E-05 |
| cg14534967 | <i>ABHD11</i>   | -5.304 | 69  | 93  | 1.71E-05 |
| cg09867157 | <i>BAT3</i>     | -5.454 | 102 | 60  | 1.71E-05 |
| cg09891761 | <i>F5</i>       | -5.045 | 70  | 92  | 1.71E-05 |
| cg01292265 | <i>NOL5A</i>    | -4.956 | 61  | 101 | 1.72E-05 |
| cg02213716 | <i>PHGDHL1</i>  | -5.214 | 108 | 54  | 1.72E-05 |
| cg15427774 | <i>GORASP1</i>  | -4.831 | 127 | 35  | 1.72E-05 |
| cg15824968 | <i>AP1G1</i>    | -4.771 | 62  | 100 | 1.72E-05 |
| cg25409040 | <i>CSTF3</i>    | -5.373 | 110 | 52  | 1.72E-05 |
| cg20830531 | <i>NUDT6</i>    | -5.229 | 57  | 105 | 1.73E-05 |
| cg26317111 | <i>UBE2U</i>    | 3.359  | 103 | 59  | 1.73E-05 |
| cg06255524 | <i>DNAJC3</i>   | -5.425 | 102 | 60  | 1.73E-05 |
| cg13310671 | <i>ZNF313</i>   | -5.732 | 86  | 76  | 1.73E-05 |
| cg15125634 | <i>RAB11A</i>   | -5.101 | 95  | 67  | 1.73E-05 |
| cg23429696 | <i>B3GAT2</i>   | -6.669 | 83  | 79  | 1.73E-05 |
| cg23970785 | <i>DEXI</i>     | -5.261 | 58  | 104 | 1.73E-05 |
| cg24027342 | <i>ATM</i>      | 1.670  | 68  | 94  | 1.73E-05 |
| cg24306924 | <i>GPT2</i>     | -5.380 | 91  | 71  | 1.73E-05 |
| cg05293407 | <i>RFP</i>      | -4.631 | 93  | 69  | 1.74E-05 |
| cg12783640 | <i>ABCC5</i>    | -5.573 | 94  | 68  | 1.74E-05 |
| cg07334912 | <i>HARS2</i>    | -4.602 | 71  | 91  | 1.74E-05 |
| cg08799191 | <i>FLJ22222</i> | -3.942 | 87  | 75  | 1.74E-05 |
| cg23594876 | <i>BLCAP</i>    | -4.584 | 30  | 132 | 1.74E-05 |
| cg24323031 | <i>PAQR8</i>    | -4.045 | 67  | 95  | 1.74E-05 |
| cg27278802 | <i>CCS</i>      | 2.720  | 72  | 90  | 1.74E-05 |
| cg10872447 | <i>GTF2F2</i>   | -5.607 | 87  | 75  | 1.74E-05 |
| cg03429034 | <i>ZKSCAN1</i>  | -4.708 | 74  | 88  | 1.74E-05 |
| cg10069638 | <i>NFIA</i>     | -5.168 | 50  | 112 | 1.74E-05 |
| cg08307963 | <i>GJA5</i>     | -3.429 | 85  | 77  | 1.74E-05 |
| cg22165507 | <i>MGST3</i>    | -4.625 | 71  | 91  | 1.74E-05 |
| cg03201604 | <i>ASAH1</i>    | -4.881 | 89  | 73  | 1.75E-05 |
| cg12667808 | <i>KIAA0082</i> | -5.829 | 43  | 119 | 1.75E-05 |
| cg13296563 | <i>RPL6</i>     | -5.402 | 89  | 73  | 1.75E-05 |
| cg18748332 | <i>ATF7</i>     | -5.101 | 84  | 78  | 1.75E-05 |
| cg21796234 | <i>C3orf23</i>  | -4.710 | 35  | 127 | 1.75E-05 |

|            |                  |        |     |     |          |
|------------|------------------|--------|-----|-----|----------|
| cg00728398 | <i>C1orf149</i>  | -5.749 | 38  | 124 | 1.76E-05 |
| cg01533387 | <i>IFI30</i>     | -5.547 | 84  | 78  | 1.76E-05 |
| cg02046340 | <i>ZNF313</i>    | -3.639 | 58  | 104 | 1.76E-05 |
| cg02057157 | <i>CNO</i>       | -3.121 | 56  | 106 | 1.76E-05 |
| cg03617367 | <i>C14orf43</i>  | -5.534 | 43  | 119 | 1.76E-05 |
| cg11246695 | <i>PIAS3</i>     | -6.135 | 62  | 100 | 1.76E-05 |
| cg11653266 | <i>MRPL38</i>    | -5.234 | 49  | 113 | 1.76E-05 |
| cg03509024 | <i>VHL</i>       | -5.376 | 105 | 57  | 1.76E-05 |
| cg14590817 | <i>ADARB2</i>    | -4.488 | 104 | 58  | 1.76E-05 |
| cg14714578 | <i>B3GTL</i>     | -6.054 | 50  | 112 | 1.76E-05 |
| cg19721215 | <i>GCDH</i>      | -5.024 | 92  | 70  | 1.76E-05 |
| cg26260350 | <i>OTX1</i>      | -4.633 | 49  | 113 | 1.76E-05 |
| cg02290509 | <i>TBL2</i>      | -5.121 | 65  | 97  | 1.76E-05 |
| cg18418503 | <i>STAM</i>      | -4.975 | 72  | 90  | 1.76E-05 |
| cg07789552 | <i>STK40</i>     | -3.591 | 96  | 66  | 1.76E-05 |
| cg18473162 | <i>LOC126208</i> | -5.630 | 100 | 62  | 1.76E-05 |
| cg24847163 | <i>GABBR1</i>    | -5.943 | 56  | 106 | 1.76E-05 |
| cg17061853 | <i>C12orf11</i>  | -4.368 | 69  | 93  | 1.76E-05 |
| cg03900104 | <i>PPP1R13L</i>  | -4.971 | 69  | 93  | 1.77E-05 |
| cg25917510 | <i>HOXC8</i>     | -4.775 | 77  | 85  | 1.79E-05 |
| cg19586645 | <i>MIF4GD</i>    | -5.468 | 101 | 61  | 1.79E-05 |
| cg22854546 | <i>WDR33</i>     | -5.610 | 95  | 67  | 1.79E-05 |
| cg07364638 | <i>NGRN</i>      | -5.357 | 61  | 101 | 1.79E-05 |
| cg09123444 | <i>MGC13170</i>  | -5.169 | 83  | 79  | 1.79E-05 |
| cg27510871 | <i>C9orf43</i>   | -6.421 | 108 | 54  | 1.79E-05 |
| cg04128563 | <i>AMD1</i>      | -5.874 | 89  | 73  | 1.80E-05 |
| cg18652941 | <i>CD44</i>      | -4.068 | 92  | 70  | 1.80E-05 |
| cg15965913 | <i>C1orf121</i>  | -4.134 | 83  | 79  | 1.80E-05 |
| cg15502446 | <i>HSPC138</i>   | -4.440 | 39  | 123 | 1.80E-05 |
| cg04223844 | <i>IKBKB</i>     | -4.834 | 66  | 96  | 1.80E-05 |
| cg08259617 | <i>GADD45B</i>   | -5.029 | 52  | 110 | 1.80E-05 |
| cg17386185 | <i>GLYCTK</i>    | -1.945 | 60  | 102 | 1.81E-05 |
| cg03152785 | <i>KCNC4</i>     | -6.015 | 68  | 94  | 1.81E-05 |
| cg10432177 | <i>BIK</i>       | -4.474 | 77  | 85  | 1.81E-05 |
| cg27152280 | <i>NRG2</i>      | -5.184 | 93  | 69  | 1.81E-05 |
| cg03627896 | <i>LOC283932</i> | -4.728 | 94  | 68  | 1.81E-05 |
| cg07065941 | <i>KLF10</i>     | -3.668 | 106 | 56  | 1.81E-05 |
| cg27016863 | <i>CDC7</i>      | -4.951 | 75  | 87  | 1.81E-05 |
| cg05501721 | <i>CRTC1</i>     | -5.731 | 65  | 97  | 1.81E-05 |
| cg15002214 | <i>NOG</i>       | -5.699 | 55  | 107 | 1.82E-05 |
| cg23475963 | <i>CALU</i>      | -5.051 | 63  | 99  | 1.82E-05 |
| cg12341414 | <i>REPS1</i>     | -5.481 | 63  | 99  | 1.82E-05 |
| cg13975625 | <i>NPY5R</i>     | -3.434 | 79  | 83  | 1.84E-05 |
| cg14640481 | <i>BRI3</i>      | -5.513 | 87  | 75  | 1.84E-05 |
| cg26224139 | <i>C9orf116</i>  | 2.550  | 92  | 70  | 1.84E-05 |
| cg04518106 | <i>RPL26</i>     | -4.904 | 84  | 78  | 1.84E-05 |
| cg08413366 | <i>PPP3CB</i>    | -4.942 | 61  | 101 | 1.84E-05 |
| cg12460541 | <i>ITPKA</i>     | -2.391 | 102 | 60  | 1.84E-05 |
| cg13405161 | <i>EIF2C2</i>    | -5.388 | 70  | 92  | 1.84E-05 |
| cg18313702 | <i>EIF2B5</i>    | -4.981 | 90  | 72  | 1.84E-05 |
| cg15508020 | <i>CSNK2A2</i>   | -4.667 | 106 | 56  | 1.84E-05 |
| cg09425898 | <i>PRNT</i>      | 3.167  | 68  | 94  | 1.84E-05 |
| cg11050527 | <i>ATP6V1H</i>   | -3.958 | 62  | 100 | 1.84E-05 |
| cg20559561 | <i>RNF10</i>     | -5.577 | 55  | 107 | 1.85E-05 |
| cg21211608 | <i>RAP1B</i>     | -5.148 | 26  | 136 | 1.85E-05 |

|            |                 |        |     |     |          |
|------------|-----------------|--------|-----|-----|----------|
| cg17780098 | <i>CSRP1</i>    | -4.765 | 98  | 64  | 1.85E-05 |
| cg01677177 | <i>ZBTB26</i>   | -3.586 | 103 | 59  | 1.85E-05 |
| cg25762395 | <i>C1orf174</i> | -5.567 | 62  | 100 | 1.85E-05 |
| cg02425732 | <i>RRBP1</i>    | -4.774 | 84  | 78  | 1.85E-05 |
| cg15842400 | <i>GABPA</i>    | -5.188 | 57  | 105 | 1.85E-05 |
| cg17697457 | <i>GEMIN7</i>   | -5.512 | 95  | 67  | 1.85E-05 |
| cg09189428 | <i>ZNF278</i>   | -6.084 | 90  | 72  | 1.85E-05 |
| cg03731616 | <i>MYLK</i>     | -2.546 | 93  | 69  | 1.86E-05 |
| cg17356532 | <i>SPCS2</i>    | -4.346 | 98  | 64  | 1.86E-05 |
| cg22774012 | <i>HEL308</i>   | -5.266 | 62  | 100 | 1.86E-05 |
| cg14409958 | <i>ENPP2</i>    | -3.701 | 52  | 110 | 1.87E-05 |
| cg00729541 | <i>FAM73B</i>   | -4.573 | 93  | 69  | 1.87E-05 |
| cg06655089 | <i>IMPDH2</i>   | -6.537 | 79  | 83  | 1.87E-05 |
| cg13338132 | <i>FAM71C</i>   | 3.008  | 114 | 48  | 1.87E-05 |
| cg20126158 | <i>43896</i>    | -4.811 | 76  | 86  | 1.87E-05 |
| cg22949637 | <i>PRPF38B</i>  | -4.882 | 75  | 87  | 1.87E-05 |
| cg23360251 | <i>LEPREL2</i>  | -4.797 | 71  | 91  | 1.87E-05 |
| cg25478157 | <i>CEP350</i>   | -5.874 | 81  | 81  | 1.87E-05 |
| cg23258063 | <i>SCYL3</i>    | -5.322 | 52  | 110 | 1.87E-05 |
| cg13264741 | <i>GRIN2B</i>   | -3.861 | 39  | 123 | 1.88E-05 |
| cg04884122 | <i>PSMB5</i>    | -5.115 | 77  | 85  | 1.88E-05 |
| cg05357320 | <i>ZNF317</i>   | -5.459 | 85  | 77  | 1.88E-05 |
| cg09194650 | <i>TCHP</i>     | -5.223 | 102 | 60  | 1.88E-05 |
| cg11611854 | <i>RPL17</i>    | -4.640 | 60  | 102 | 1.88E-05 |
| cg19957727 | <i>DNAJB11</i>  | -5.864 | 100 | 62  | 1.88E-05 |
| cg21452443 | <i>NMT1</i>     | -5.042 | 60  | 102 | 1.89E-05 |
| cg16209630 | <i>ZNHIT2</i>   | -5.644 | 36  | 126 | 1.89E-05 |
| cg18830459 | <i>IBRDC3</i>   | -6.832 | 90  | 72  | 1.89E-05 |
| cg07301822 | <i>SEC24D</i>   | -5.071 | 82  | 80  | 1.90E-05 |
| cg20573242 | <i>CCNA2</i>    | -5.555 | 81  | 81  | 1.90E-05 |
| cg24555656 | <i>TAF6</i>     | -5.831 | 65  | 97  | 1.90E-05 |
| cg24847572 | <i>STCH</i>     | -5.816 | 63  | 99  | 1.91E-05 |
| cg06636463 | <i>DDX1</i>     | -3.488 | 78  | 84  | 1.91E-05 |
| cg26352374 | <i>MGC10992</i> | -6.079 | 56  | 106 | 1.91E-05 |
| cg02890926 | <i>TMEM53</i>   | -5.839 | 48  | 114 | 1.92E-05 |
| cg05409601 | <i>CCNG2</i>    | -4.570 | 66  | 96  | 1.92E-05 |
| cg14776416 | <i>MELK</i>     | -4.954 | 79  | 83  | 1.92E-05 |
| cg21703138 | <i>PPP2CA</i>   | -5.321 | 38  | 124 | 1.92E-05 |
| cg27287808 | <i>PLK3</i>     | -5.264 | 45  | 117 | 1.93E-05 |
| cg03115649 | <i>TOR1AIP1</i> | -6.344 | 60  | 102 | 1.93E-05 |
| cg08299045 | <i>MRPL55</i>   | -5.877 | 112 | 50  | 1.94E-05 |
| cg26648592 | <i>HEBP1</i>    | -4.651 | 61  | 101 | 1.94E-05 |
| cg21459921 | <i>ADRM1</i>    | -5.064 | 108 | 54  | 1.94E-05 |
| cg11408517 | <i>LATS1</i>    | -4.905 | 104 | 58  | 1.94E-05 |
| cg13233799 | <i>PTPRF</i>    | -4.779 | 95  | 67  | 1.94E-05 |
| cg07912181 | <i>HSD17B12</i> | -6.403 | 61  | 101 | 1.96E-05 |
| cg09752703 | <i>BCL2</i>     | -4.911 | 61  | 101 | 1.96E-05 |
| cg14265670 | <i>UPP1</i>     | -4.861 | 85  | 77  | 1.96E-05 |
| cg21185421 | <i>C9orf42</i>  | -6.242 | 42  | 120 | 1.96E-05 |
| cg26673943 | <i>CDKN2A</i>   | -4.544 | 61  | 101 | 1.96E-05 |
| cg06289589 | <i>ANKRD5</i>   | -4.929 | 91  | 71  | 1.96E-05 |
| cg16405575 | <i>TSPAN9</i>   | -5.228 | 70  | 92  | 1.96E-05 |
| cg16009558 | <i>GRIK2</i>    | -3.604 | 101 | 61  | 1.97E-05 |
| cg00105253 | <i>NUDT14</i>   | -3.700 | 88  | 74  | 1.97E-05 |
| cg07811498 | <i>LOC91689</i> | -4.042 | 91  | 71  | 1.97E-05 |

|            |           |        |     |     |          |
|------------|-----------|--------|-----|-----|----------|
| cg16625216 | GAK       | -5.577 | 59  | 103 | 1.97E-05 |
| cg23323711 | RPL22     | -6.254 | 46  | 116 | 1.97E-05 |
| cg18235146 | MGC5509   | -4.949 | 42  | 120 | 1.98E-05 |
| cg20269976 | GAA       | -4.353 | 54  | 108 | 1.98E-05 |
| cg12205047 | IGSF3     | -5.139 | 83  | 79  | 1.99E-05 |
| cg06384463 | BARHL2    | -4.403 | 82  | 80  | 2.00E-05 |
| cg02595263 | MRPS28    | -5.372 | 109 | 53  | 2.00E-05 |
| cg07992625 | ATF7      | -4.557 | 71  | 91  | 2.00E-05 |
| cg09439093 | PECI      | -5.149 | 58  | 104 | 2.00E-05 |
| cg16558348 | UBQLN1    | -5.595 | 49  | 113 | 2.00E-05 |
| cg21721865 | UFM1      | -5.554 | 64  | 98  | 2.00E-05 |
| cg00859193 | C13orf12  | -4.801 | 81  | 81  | 2.00E-05 |
| cg11084035 | GANAB     | -4.751 | 137 | 25  | 2.01E-05 |
| cg17647744 | TMEM9B    | -5.603 | 37  | 125 | 2.01E-05 |
| cg02504465 | SNX3      | -5.604 | 85  | 77  | 2.01E-05 |
| cg05882522 | EHD3      | -4.580 | 54  | 108 | 2.01E-05 |
| cg01078871 | FBXO33    | -3.740 | 82  | 80  | 2.02E-05 |
| cg21210758 | EVC       | -2.751 | 91  | 71  | 2.02E-05 |
| cg23099349 | HIST1H3B  | -4.803 | 117 | 45  | 2.02E-05 |
| cg26380756 | JOSD1     | -6.133 | 90  | 72  | 2.02E-05 |
| cg03192737 | OSTN      | -0.141 | 64  | 98  | 2.03E-05 |
| cg01281797 | LYSMD1    | -3.296 | 95  | 67  | 2.03E-05 |
| cg04135543 | ORF1-FL49 | -3.870 | 73  | 89  | 2.03E-05 |
| cg22606062 | CCNI      | -5.316 | 77  | 85  | 2.03E-05 |
| cg00268338 | HECTD2    | -5.739 | 71  | 91  | 2.03E-05 |
| cg24473633 | DENND3    | -5.008 | 59  | 103 | 2.04E-05 |
| cg17127823 | TRAM1     | -1.353 | 108 | 54  | 2.05E-05 |
| cg23866755 | CNP       | -4.477 | 77  | 85  | 2.05E-05 |
| cg18676764 | WDR40A    | 3.703  | 85  | 77  | 2.05E-05 |
| cg13770446 | CLCNKA    | 2.123  | 66  | 96  | 2.05E-05 |
| cg10158181 | GRK4      | -5.963 | 59  | 103 | 2.05E-05 |
| cg15832292 | MANEA     | -5.321 | 61  | 101 | 2.05E-05 |
| cg24326142 | CSF1      | -4.816 | 72  | 90  | 2.06E-05 |
| cg10652277 | SLC30A9   | -4.593 | 57  | 105 | 2.06E-05 |
| cg10575841 | TMED7     | -5.874 | 60  | 102 | 2.06E-05 |
| cg08270477 | C17orf45  | -5.765 | 81  | 81  | 2.07E-05 |
| cg02592124 | SUMO1     | -5.388 | 69  | 93  | 2.07E-05 |
| cg05940463 | C1orf86   | -4.733 | 90  | 72  | 2.07E-05 |
| cg10976673 | CCRN4L    | -4.623 | 100 | 62  | 2.07E-05 |
| cg13714039 | ZNF14     | -5.930 | 116 | 46  | 2.07E-05 |
| cg19124998 | GLTSCR2   | -4.769 | 108 | 54  | 2.07E-05 |
| cg21335942 | SETD6     | -5.996 | 69  | 93  | 2.07E-05 |
| cg24552431 | ATAD1     | -4.428 | 68  | 94  | 2.07E-05 |
| cg07125009 | ZNF689    | -5.869 | 98  | 64  | 2.07E-05 |
| cg14131445 | C16orf58  | -4.098 | 104 | 58  | 2.07E-05 |
| cg21069922 | ERAL1     | -4.723 | 73  | 89  | 2.07E-05 |
| cg22889570 | ZNF596    | -5.292 | 66  | 96  | 2.07E-05 |
| cg23832061 | PPIL6     | -6.038 | 58  | 104 | 2.07E-05 |
| cg23076086 | FYN       | -4.985 | 119 | 43  | 2.08E-05 |
| cg26831968 | GBF1      | -6.407 | 49  | 113 | 2.08E-05 |
| cg00247489 | CR2       | -4.332 | 64  | 98  | 2.08E-05 |
| cg01665633 | NDNL2     | -4.982 | 86  | 76  | 2.08E-05 |
| cg04469303 | PRDM15    | -5.551 | 68  | 94  | 2.08E-05 |
| cg06654447 | MGC14141  | -4.757 | 68  | 94  | 2.08E-05 |
| cg06901392 | HSPH1     | -4.733 | 60  | 102 | 2.08E-05 |

|            |                 |        |     |     |          |
|------------|-----------------|--------|-----|-----|----------|
| cg07520161 | <i>TMTC3</i>    | -4.367 | 50  | 112 | 2.08E-05 |
| cg17385674 | <i>ARID1A</i>   | -5.299 | 73  | 89  | 2.08E-05 |
| cg21112925 | <i>CES2</i>     | -4.776 | 100 | 62  | 2.08E-05 |
| cg22916109 | <i>IREB2</i>    | -6.188 | 87  | 75  | 2.08E-05 |
| cg06952117 | <i>NAB1</i>     | -5.390 | 45  | 117 | 2.09E-05 |
| cg03076871 | <i>STX16</i>    | -4.889 | 70  | 92  | 2.10E-05 |
| cg08563994 | <i>IHPK1</i>    | -5.516 | 43  | 119 | 2.10E-05 |
| cg22563182 | <i>QIL1</i>     | -5.355 | 55  | 107 | 2.11E-05 |
| cg02571905 | <i>TMEM107</i>  | -5.508 | 78  | 84  | 2.11E-05 |
| cg24088751 | <i>GTF2A2</i>   | -4.412 | 72  | 90  | 2.11E-05 |
| cg14405589 | <i>TUBGCP3</i>  | -6.057 | 61  | 101 | 2.11E-05 |
| cg10450322 | <i>CDKN2C</i>   | -4.039 | 92  | 70  | 2.11E-05 |
| cg16664233 | <i>ETHE1</i>    | -5.142 | 103 | 59  | 2.11E-05 |
| cg27285278 | <i>TRIM41</i>   | -5.236 | 66  | 96  | 2.11E-05 |
| cg05546383 | <i>OTUD4</i>    | 3.115  | 98  | 64  | 2.12E-05 |
| cg03563403 | <i>FANCG</i>    | -5.897 | 41  | 121 | 2.14E-05 |
| cg25323711 | <i>CLGN</i>     | -4.692 | 87  | 75  | 2.14E-05 |
| cg26216632 | <i>C2orf27</i>  | 1.696  | 79  | 83  | 2.14E-05 |
| cg19517525 | <i>ACTG1</i>    | -5.245 | 53  | 109 | 2.15E-05 |
| cg10523820 | <i>ZDHHC24</i>  | -4.834 | 74  | 88  | 2.16E-05 |
| cg11396509 | <i>SIRT2</i>    | -5.250 | 40  | 122 | 2.16E-05 |
| cg13002939 | <i>PDGFRA</i>   | -4.868 | 87  | 75  | 2.16E-05 |
| cg19255853 | <i>LOC93622</i> | -5.167 | 63  | 99  | 2.16E-05 |
| cg10219037 | <i>C11orf1</i>  | -4.830 | 44  | 118 | 2.16E-05 |
| cg16185365 | <i>RNF168</i>   | -5.384 | 89  | 73  | 2.16E-05 |
| cg21762107 | <i>NEURL2</i>   | -5.405 | 75  | 87  | 2.17E-05 |
| cg21321885 | <i>NDE1</i>     | -6.021 | 66  | 96  | 2.17E-05 |
| cg12072973 | <i>PLEKHO1</i>  | -5.590 | 48  | 114 | 2.18E-05 |
| cg10038259 | <i>HNRPAB</i>   | -5.683 | 56  | 106 | 2.18E-05 |
| cg09765256 | <i>ZNF668</i>   | -4.975 | 43  | 119 | 2.18E-05 |
| cg03608167 | <i>CXCR4</i>    | -5.388 | 31  | 131 | 2.18E-05 |
| cg07526021 | <i>DHFR</i>     | -5.607 | 74  | 88  | 2.18E-05 |
| cg03863549 | <i>NOL6</i>     | -4.657 | 47  | 115 | 2.19E-05 |
| cg26260201 | <i>PCSK4</i>    | -6.205 | 76  | 86  | 2.19E-05 |
| cg13581475 | <i>MTHFD1</i>   | -6.168 | 81  | 81  | 2.19E-05 |
| cg20060451 | <i>MAML1</i>    | -4.614 | 117 | 45  | 2.20E-05 |
| cg26303908 | <i>GNPDA2</i>   | -4.931 | 46  | 116 | 2.20E-05 |
| cg03691812 | <i>CORO1A</i>   | -5.149 | 37  | 125 | 2.21E-05 |
| cg04495969 | <i>FBXO11</i>   | -5.139 | 47  | 115 | 2.21E-05 |
| cg26516941 | <i>DPAGT1</i>   | -4.837 | 65  | 97  | 2.21E-05 |
| cg20141751 | <i>GLT8D1</i>   | -5.616 | 73  | 89  | 2.22E-05 |
| cg03975345 | <i>MGC34713</i> | -6.114 | 43  | 119 | 2.22E-05 |
| cg08034397 | <i>TMEM16K</i>  | -5.663 | 77  | 85  | 2.22E-05 |
| cg08872742 | <i>CDH5</i>     | -0.723 | 65  | 97  | 2.23E-05 |
| cg10262425 | <i>PGLS</i>     | -3.598 | 99  | 63  | 2.23E-05 |
| cg10377451 | <i>RAB33B</i>   | -6.020 | 48  | 114 | 2.23E-05 |
| cg11129291 | <i>DARS</i>     | -4.704 | 37  | 125 | 2.23E-05 |
| cg12323894 | <i>DBI</i>      | -4.503 | 95  | 67  | 2.23E-05 |
| cg17610929 | <i>ACCN4</i>    | -4.960 | 65  | 97  | 2.23E-05 |
| cg16687447 | <i>PTEN</i>     | -6.765 | 73  | 89  | 2.23E-05 |
| cg11719412 | <i>NDUFB9</i>   | -6.313 | 68  | 94  | 2.24E-05 |
| cg25371182 | <i>CTNS</i>     | -3.715 | 58  | 104 | 2.24E-05 |
| cg26709859 | <i>SYNJ2BP</i>  | -4.881 | 87  | 75  | 2.24E-05 |
| cg11012046 | <i>LOC89944</i> | -4.824 | 102 | 60  | 2.25E-05 |
| cg16481281 | <i>IL11</i>     | -5.098 | 85  | 77  | 2.25E-05 |

|            |                  |        |     |     |          |
|------------|------------------|--------|-----|-----|----------|
| cg21858376 | <i>ITPR1</i>     | -4.857 | 66  | 96  | 2.25E-05 |
| cg13438543 | <i>TBCA</i>      | -4.373 | 72  | 90  | 2.25E-05 |
| cg09424925 | <i>RAD51L1</i>   | -3.910 | 59  | 103 | 2.26E-05 |
| cg13501507 | <i>DMXL2</i>     | -5.005 | 53  | 109 | 2.26E-05 |
| cg00838150 | <i>MITF</i>      | -4.827 | 96  | 66  | 2.26E-05 |
| cg03176585 | <i>MRPS35</i>    | -5.489 | 90  | 72  | 2.26E-05 |
| cg11316784 | <i>NSD1</i>      | -5.808 | 52  | 110 | 2.26E-05 |
| cg01360325 | <i>TAF5</i>      | -5.507 | 86  | 76  | 2.26E-05 |
| cg04765929 | <i>TNFAIP8L1</i> | -5.147 | 45  | 117 | 2.27E-05 |
| cg04413986 | <i>NACA</i>      | -5.205 | 95  | 67  | 2.27E-05 |
| cg02600515 | <i>ZBTB3</i>     | -4.080 | 41  | 121 | 2.27E-05 |
| cg07355551 | <i>ZNF343</i>    | -3.672 | 51  | 111 | 2.27E-05 |
| cg25421694 | <i>RAB5A</i>     | -2.777 | 103 | 59  | 2.29E-05 |
| cg03600687 | <i>BOK</i>       | -4.536 | 91  | 71  | 2.29E-05 |
| cg13637733 | <i>TLE3</i>      | -4.509 | 66  | 96  | 2.29E-05 |
| cg05986149 | <i>BRIP1</i>     | -2.623 | 65  | 97  | 2.29E-05 |
| cg27345286 | <i>FBXO3</i>     | -5.161 | 52  | 110 | 2.29E-05 |
| cg03243700 | <i>WDR5</i>      | -6.081 | 64  | 98  | 2.30E-05 |
| cg05715649 | <i>SYT2</i>      | 0.043  | 120 | 42  | 2.30E-05 |
| cg07520158 | <i>KIAA0241</i>  | -4.964 | 106 | 56  | 2.30E-05 |
| cg07745434 | <i>CHST13</i>    | -2.911 | 92  | 70  | 2.30E-05 |
| cg16488098 | <i>PODXL</i>     | -3.809 | 61  | 101 | 2.30E-05 |
| cg01333131 | <i>CDC42BPB</i>  | -2.483 | 81  | 81  | 2.30E-05 |
| cg04371779 | <i>C14orf118</i> | -5.562 | 72  | 90  | 2.30E-05 |
| cg25484319 | <i>RDH11</i>     | -2.954 | 55  | 107 | 2.31E-05 |
| cg17522249 | <i>ARTS-1</i>    | -4.487 | 44  | 118 | 2.32E-05 |
| cg18263177 | <i>FLJ10922</i>  | -5.060 | 104 | 58  | 2.32E-05 |
| cg00712898 | <i>PRPF38B</i>   | -5.965 | 75  | 87  | 2.33E-05 |
| cg10908369 | <i>C2orf32</i>   | -4.038 | 80  | 82  | 2.33E-05 |
| cg15170424 | <i>TMEM55A</i>   | -4.754 | 69  | 93  | 2.33E-05 |
| cg05435853 | <i>RNF41</i>     | -4.349 | 93  | 69  | 2.33E-05 |
| cg10081899 | <i>PPM1F</i>     | -4.426 | 61  | 101 | 2.33E-05 |
| cg27388792 | <i>DPP3</i>      | -5.792 | 89  | 73  | 2.33E-05 |
| cg12270520 | <i>ZNF517</i>    | -5.094 | 71  | 91  | 2.33E-05 |
| cg21631754 | <i>XTP7</i>      | 2.625  | 90  | 72  | 2.33E-05 |
| cg03048535 | <i>FOXN4</i>     | -4.652 | 105 | 57  | 2.33E-05 |
| cg06833562 | <i>C1orf181</i>  | -5.307 | 67  | 95  | 2.34E-05 |
| cg08759274 | <i>PHF5A</i>     | -3.110 | 65  | 97  | 2.34E-05 |
| cg09770323 | <i>RIS1</i>      | -4.164 | 74  | 88  | 2.34E-05 |
| cg15911500 | <i>ERCC1</i>     | -6.011 | 74  | 88  | 2.34E-05 |
| cg24269276 | <i>SFRS1</i>     | -5.143 | 89  | 73  | 2.34E-05 |
| cg00012386 | <i>C1orf142</i>  | -4.641 | 86  | 76  | 2.34E-05 |
| cg00415164 | <i>ALX4</i>      | -4.434 | 111 | 51  | 2.35E-05 |
| cg02921068 | <i>LSM8</i>      | -5.815 | 86  | 76  | 2.35E-05 |
| cg11366015 | <i>C20orf27</i>  | -5.903 | 69  | 93  | 2.35E-05 |
| cg01288067 | <i>MELK</i>      | -4.584 | 65  | 97  | 2.36E-05 |
| cg08101264 | <i>ACOT8</i>     | -3.696 | 73  | 89  | 2.36E-05 |
| cg12063359 | <i>KCNK15</i>    | -5.612 | 65  | 97  | 2.37E-05 |
| cg25500444 | <i>FLJ23514</i>  | -2.608 | 95  | 67  | 2.37E-05 |
| cg22627950 | <i>TMED4</i>     | -4.931 | 84  | 78  | 2.37E-05 |
| cg25494789 | <i>KIF11</i>     | -5.115 | 88  | 74  | 2.37E-05 |
| cg16222762 | <i>SYT4</i>      | -4.524 | 80  | 82  | 2.38E-05 |
| cg22068764 | <i>SCYL1BP1</i>  | -5.008 | 77  | 85  | 2.38E-05 |
| cg07557424 | <i>C9orf23</i>   | -4.072 | 70  | 92  | 2.38E-05 |
| cg01120898 | <i>IL1RAP</i>    | -5.566 | 76  | 86  | 2.38E-05 |

|            |           |        |     |     |          |
|------------|-----------|--------|-----|-----|----------|
| cg01928902 | ZFP36L1   | -4.578 | 83  | 79  | 2.38E-05 |
| cg12576700 | CDK5RAP2  | -5.217 | 83  | 79  | 2.39E-05 |
| cg13360404 | KIAA0265  | -5.416 | 79  | 83  | 2.40E-05 |
| cg16417937 | NUDC      | -5.846 | 92  | 70  | 2.40E-05 |
| cg22802739 | DBF4      | -4.465 | 80  | 82  | 2.40E-05 |
| cg13277160 | LOC151194 | -5.309 | 87  | 75  | 2.41E-05 |
| cg05159188 | HIST1H4F  | -3.574 | 84  | 78  | 2.41E-05 |
| cg11574612 | CYP39A1   | -4.184 | 53  | 109 | 2.42E-05 |
| cg25335775 | MRPS14    | -4.406 | 94  | 68  | 2.42E-05 |
| cg17428950 | SQRDL     | -5.336 | 69  | 93  | 2.43E-05 |
| cg20470275 | SNX24     | -5.154 | 73  | 89  | 2.43E-05 |
| cg06254453 | HIST1H3F  | -4.818 | 55  | 107 | 2.44E-05 |
| cg10027114 | C12orf58  | -5.211 | 101 | 61  | 2.44E-05 |
| cg03261004 | MAN1B1    | -5.619 | 102 | 60  | 2.45E-05 |
| cg15445332 | MKNK1     | -5.846 | 107 | 55  | 2.45E-05 |
| cg00861635 | ZNF200    | -4.394 | 60  | 102 | 2.45E-05 |
| cg00059740 | MGC5242   | -5.717 | 68  | 94  | 2.45E-05 |
| cg04197051 | PIGM      | -5.767 | 64  | 98  | 2.46E-05 |
| cg17820591 | ENO3      | -4.252 | 78  | 84  | 2.46E-05 |
| cg04382920 | SLC25A31  | 6.013  | 88  | 74  | 2.47E-05 |
| cg01137532 | ZNF365    | -4.466 | 44  | 118 | 2.47E-05 |
| cg27379587 | NMB       | -2.314 | 137 | 25  | 2.47E-05 |
| cg00261552 | CREBL2    | -4.331 | 38  | 124 | 2.47E-05 |
| cg24792272 | MCM4      | -4.137 | 63  | 99  | 2.47E-05 |
| cg24509668 | SSPN      | -2.597 | 83  | 79  | 2.48E-05 |
| cg24505527 | NKIRAS2   | -5.343 | 70  | 92  | 2.50E-05 |
| cg17179099 | APPBP2    | -6.172 | 86  | 76  | 2.51E-05 |
| cg14443380 | SEMA7A    | -5.090 | 40  | 122 | 2.51E-05 |
| cg26918442 | LCMT2     | -5.772 | 44  | 118 | 2.52E-05 |
| cg14171523 | KIAA0446  | -5.414 | 69  | 93  | 2.53E-05 |
| cg25201980 | ZNF250    | -5.221 | 57  | 105 | 2.53E-05 |
| cg26194560 | GTF3C3    | -3.395 | 74  | 88  | 2.53E-05 |
| cg25344639 | SEC14L1   | -4.600 | 59  | 103 | 2.53E-05 |
| cg08646988 | GFPT1     | -5.381 | 59  | 103 | 2.53E-05 |
| cg11594415 | BAT2D1    | -5.963 | 64  | 98  | 2.53E-05 |
| cg21463023 | SS18L2    | -4.153 | 57  | 105 | 2.54E-05 |
| cg02840794 | HPS6      | -4.573 | 86  | 76  | 2.54E-05 |
| cg05095674 | GTF2H2    | -4.637 | 77  | 85  | 2.54E-05 |
| cg08197201 | RAB6IP2   | -5.760 | 61  | 101 | 2.54E-05 |
| cg12043807 | ZNF367    | -5.333 | 84  | 78  | 2.54E-05 |
| cg17161537 | MRPL12    | -5.247 | 70  | 92  | 2.54E-05 |
| cg20555507 | TRPM3     | -2.969 | 62  | 100 | 2.54E-05 |
| cg23013931 | SLC25A17  | -4.880 | 101 | 61  | 2.54E-05 |
| cg25291907 | MIB1      | -6.029 | 66  | 96  | 2.55E-05 |
| cg17552093 | SIRT7     | -5.253 | 72  | 90  | 2.56E-05 |
| cg00827369 | WBSCR1    | -4.904 | 103 | 59  | 2.56E-05 |
| cg04676561 | HIST1H1B  | -3.904 | 79  | 83  | 2.56E-05 |
| cg03245962 | XRN1      | -4.621 | 34  | 128 | 2.57E-05 |
| cg04741821 | TXNDC13   | -5.032 | 92  | 70  | 2.57E-05 |
| cg12390946 | INPP5A    | -5.180 | 118 | 44  | 2.58E-05 |
| cg22950347 | C13orf23  | -5.447 | 39  | 123 | 2.58E-05 |
| cg10264187 | SLC39A13  | -4.959 | 34  | 128 | 2.58E-05 |
| cg14838256 | SRD5A2L   | -5.763 | 51  | 111 | 2.58E-05 |
| cg21350283 | ACTN1     | -5.513 | 102 | 60  | 2.58E-05 |
| cg18412613 | YKT6      | -3.179 | 88  | 74  | 2.58E-05 |

|            |                  |        |     |     |          |
|------------|------------------|--------|-----|-----|----------|
| cg23489497 | <i>ATPBD1B</i>   | -5.366 | 83  | 79  | 2.58E-05 |
| cg01969748 | <i>GPSM2</i>     | -5.773 | 44  | 118 | 2.58E-05 |
| cg01483882 | <i>TP53INP2</i>  | -5.703 | 71  | 91  | 2.59E-05 |
| cg03132911 | <i>IQGAP2</i>    | -5.881 | 101 | 61  | 2.59E-05 |
| cg05661333 | <i>GABBR1</i>    | -4.824 | 62  | 100 | 2.59E-05 |
| cg06282240 | <i>CENPJ</i>     | -5.943 | 38  | 124 | 2.59E-05 |
| cg07371290 | <i>HDAC5</i>     | -4.851 | 55  | 107 | 2.59E-05 |
| cg10277195 | <i>MDC1</i>      | -5.178 | 61  | 101 | 2.59E-05 |
| cg14981132 | <i>HNRPA1</i>    | -3.585 | 87  | 75  | 2.59E-05 |
| cg15680574 | <i>CCNL1</i>     | -4.012 | 44  | 118 | 2.59E-05 |
| cg15812873 | <i>SULT1A1</i>   | -4.565 | 112 | 50  | 2.59E-05 |
| cg16091845 | <i>SMARCA5</i>   | -6.204 | 98  | 64  | 2.59E-05 |
| cg16298282 | <i>KIAA0776</i>  | -3.398 | 47  | 115 | 2.59E-05 |
| cg19678067 | <i>ZNF403</i>    | -3.997 | 106 | 56  | 2.59E-05 |
| cg24570987 | <i>RPS6KB2</i>   | -6.421 | 57  | 105 | 2.59E-05 |
| cg26705553 | <i>MMP25</i>     | -4.894 | 94  | 68  | 2.59E-05 |
| cg00076645 | <i>DC-Ubp</i>    | -4.267 | 31  | 131 | 2.60E-05 |
| cg00645922 | <i>TMED7</i>     | -5.285 | 42  | 120 | 2.60E-05 |
| cg03593419 | <i>GABRA4</i>    | -4.218 | 61  | 101 | 2.60E-05 |
| cg21803680 | <i>LOC92691</i>  | -4.802 | 106 | 56  | 2.61E-05 |
| cg06058319 | <i>PPFIBP1</i>   | -3.551 | 91  | 71  | 2.61E-05 |
| cg12435359 | <i>BTBD1</i>     | -6.148 | 51  | 111 | 2.61E-05 |
| cg16705481 | <i>TRAPPC3</i>   | -5.466 | 87  | 75  | 2.61E-05 |
| cg17927917 | <i>INSIG1</i>    | -5.865 | 92  | 70  | 2.61E-05 |
| cg25624712 | <i>LOC92345</i>  | -6.048 | 51  | 111 | 2.61E-05 |
| cg06063729 | <i>RASSF1</i>    | -3.834 | 78  | 84  | 2.61E-05 |
| cg06491924 | <i>ZNF613</i>    | -5.472 | 109 | 53  | 2.61E-05 |
| cg12228229 | <i>DLG4</i>      | 1.399  | 76  | 86  | 2.62E-05 |
| cg26387998 | <i>HE LZ</i>     | -4.622 | 104 | 58  | 2.62E-05 |
| cg00032227 | <i>NAT9</i>      | -5.318 | 87  | 75  | 2.63E-05 |
| cg20956373 | <i>USP48</i>     | -5.326 | 73  | 89  | 2.64E-05 |
| cg11676109 | <i>MIZF</i>      | -5.275 | 42  | 120 | 2.64E-05 |
| cg15500658 | <i>SPEN</i>      | -5.321 | 79  | 83  | 2.64E-05 |
| cg13417824 | <i>RPP38</i>     | -5.644 | 106 | 56  | 2.64E-05 |
| cg26102760 | <i>PASK</i>      | -5.890 | 84  | 78  | 2.64E-05 |
| cg07008386 | <i>PLCB1</i>     | -4.261 | 48  | 114 | 2.65E-05 |
| cg09998519 | <i>HNRPU</i>     | -4.482 | 76  | 86  | 2.65E-05 |
| cg08393541 | <i>NUDC</i>      | -5.050 | 111 | 51  | 2.66E-05 |
| cg21060854 | <i>TOR1B</i>     | -6.147 | 65  | 97  | 2.67E-05 |
| cg03274654 | <i>KPNA3</i>     | -4.755 | 39  | 123 | 2.67E-05 |
| cg03999420 | <i>MYCBP2</i>    | -4.859 | 54  | 108 | 2.67E-05 |
| cg24343515 | <i>PI4KII</i>    | -6.324 | 72  | 90  | 2.68E-05 |
| cg11917694 | <i>STAMBPL1</i>  | -4.396 | 74  | 88  | 2.68E-05 |
| cg22215520 | <i>PAIP1</i>     | -5.454 | 85  | 77  | 2.70E-05 |
| cg01176271 | <i>SNX1</i>      | -5.650 | 65  | 97  | 2.70E-05 |
| cg06027949 | <i>SNX16</i>     | -3.981 | 85  | 77  | 2.70E-05 |
| cg05197908 | <i>CHERP</i>     | -4.211 | 106 | 56  | 2.70E-05 |
| cg24079455 | <i>C10orf137</i> | -5.704 | 69  | 93  | 2.70E-05 |
| cg20461541 | <i>PRKRIR</i>    | -5.153 | 42  | 120 | 2.70E-05 |
| cg21929993 | <i>RNF130</i>    | -4.471 | 78  | 84  | 2.71E-05 |
| cg01430807 | <i>NDUFB8</i>    | -3.995 | 40  | 122 | 2.71E-05 |
| cg17624892 | <i>HMG N4</i>    | -4.787 | 98  | 64  | 2.71E-05 |
| cg25928579 | <i>HOXB8</i>     | -3.855 | 102 | 60  | 2.71E-05 |
| cg13616221 | <i>WIP1</i>      | -5.346 | 67  | 95  | 2.72E-05 |
| cg23202277 | <i>MAPT</i>      | -5.615 | 106 | 56  | 2.72E-05 |

|            |                  |        |     |     |          |
|------------|------------------|--------|-----|-----|----------|
| cg24608308 | <i>RAPGEF3</i>   | -5.305 | 50  | 112 | 2.72E-05 |
| cg09920145 | <i>TMF1</i>      | -5.350 | 104 | 58  | 2.73E-05 |
| cg25650110 | <i>ZDHHC8</i>    | -5.088 | 45  | 117 | 2.73E-05 |
| cg01222684 | <i>TTC1</i>      | -1.969 | 92  | 70  | 2.73E-05 |
| cg08434234 | <i>DGKI</i>      | -4.719 | 72  | 90  | 2.73E-05 |
| cg01369850 | <i>ZNF175</i>    | -3.414 | 106 | 54  | 2.76E-05 |
| cg06649520 | <i>ARFIP1</i>    | -6.089 | 57  | 105 | 2.76E-05 |
| cg06953304 | <i>NKTR</i>      | -3.619 | 98  | 64  | 2.76E-05 |
| cg04515567 | <i>FOXH1</i>     | 2.493  | 89  | 73  | 2.76E-05 |
| cg13952892 | <i>SRPR</i>      | 3.088  | 55  | 107 | 2.76E-05 |
| cg24612198 | <i>CD3E</i>      | 0.586  | 57  | 105 | 2.76E-05 |
| cg24986572 | <i>ZNF193</i>    | -5.414 | 59  | 103 | 2.76E-05 |
| cg23779106 | <i>DUSP12</i>    | -5.860 | 42  | 120 | 2.77E-05 |
| cg05951993 | <i>GYS1</i>      | -5.045 | 108 | 54  | 2.77E-05 |
| cg07766315 | <i>LOC400451</i> | -4.923 | 59  | 103 | 2.77E-05 |
| cg24198840 | <i>NEU2</i>      | 3.291  | 86  | 76  | 2.77E-05 |
| cg18168989 | <i>C9orf41</i>   | 3.441  | 128 | 34  | 2.77E-05 |
| cg01939479 | <i>KIAA1018</i>  | -4.799 | 78  | 84  | 2.78E-05 |
| cg03020951 | <i>HMGA1</i>     | -3.312 | 83  | 79  | 2.78E-05 |
| cg11108432 | <i>PINX1</i>     | -5.169 | 112 | 50  | 2.78E-05 |
| cg03169527 | <i>C3orf31</i>   | -4.678 | 65  | 97  | 2.79E-05 |
| cg16075384 | <i>FLJ10099</i>  | -4.514 | 78  | 84  | 2.79E-05 |
| cg08752459 | <i>CLEC2B</i>    | -2.149 | 61  | 99  | 2.79E-05 |
| cg18125479 | <i>PYGL</i>      | -4.474 | 84  | 78  | 2.79E-05 |
| cg13604223 | <i>XPC</i>       | -5.345 | 51  | 111 | 2.79E-05 |
| cg02668984 | <i>PDK2</i>      | -4.265 | 81  | 81  | 2.79E-05 |
| cg10601939 | <i>ARL5B</i>     | -5.327 | 52  | 110 | 2.79E-05 |
| cg21566550 | <i>BMPR2</i>     | -5.853 | 55  | 107 | 2.79E-05 |
| cg08156349 | <i>MEF2D</i>     | -5.173 | 38  | 124 | 2.79E-05 |
| cg12398397 | <i>FALZ</i>      | -4.279 | 61  | 101 | 2.80E-05 |
| cg19292712 | <i>SPAM1</i>     | 2.677  | 37  | 125 | 2.80E-05 |
| cg16189954 | <i>CHEK2</i>     | -5.249 | 93  | 69  | 2.81E-05 |
| cg03289369 | <i>AASDH</i>     | -5.455 | 34  | 128 | 2.81E-05 |
| cg08256260 | <i>KCTD13</i>    | -5.758 | 80  | 82  | 2.81E-05 |
| cg17979628 | <i>NENF</i>      | -4.191 | 81  | 81  | 2.81E-05 |
| cg04562739 | <i>PCNA</i>      | -5.405 | 28  | 134 | 2.83E-05 |
| cg10812811 | <i>C20orf112</i> | -5.112 | 60  | 102 | 2.83E-05 |
| cg18878034 | <i>C6orf108</i>  | -5.837 | 73  | 89  | 2.83E-05 |
| cg26336164 | <i>FEM1A</i>     | -6.740 | 106 | 56  | 2.83E-05 |
| cg16961218 | <i>ATP9B</i>     | -5.298 | 75  | 87  | 2.84E-05 |
| cg11542231 | <i>RPA2</i>      | -5.435 | 91  | 71  | 2.84E-05 |
| cg13613532 | <i>MGC33948</i>  | -5.115 | 77  | 85  | 2.84E-05 |
| cg15482690 | <i>TARDBP</i>    | -5.901 | 58  | 104 | 2.84E-05 |
| cg20632573 | <i>SLC6A5</i>    | -3.909 | 78  | 84  | 2.84E-05 |
| cg12417299 | <i>NEK4</i>      | -5.623 | 69  | 93  | 2.84E-05 |
| cg25757737 | <i>PTPN23</i>    | -4.710 | 55  | 107 | 2.84E-05 |
| cg10328462 | <i>GRPEL2</i>    | -5.819 | 98  | 64  | 2.84E-05 |
| cg06807579 | <i>RPL29</i>     | -5.082 | 75  | 87  | 2.88E-05 |
| cg05922057 | <i>ZZEF1</i>     | -4.294 | 93  | 69  | 2.89E-05 |
| cg27165888 | <i>PMF1</i>      | -4.557 | 45  | 117 | 2.90E-05 |
| cg03560090 | <i>MGC10433</i>  | -5.206 | 49  | 113 | 2.90E-05 |
| cg19021732 | <i>C15orf29</i>  | -3.588 | 62  | 100 | 2.90E-05 |
| cg21686900 | <i>DAZAP2</i>    | -6.066 | 50  | 112 | 2.91E-05 |
| cg27215108 | <i>CD63</i>      | -3.933 | 95  | 67  | 2.91E-05 |
| cg06864275 | <i>KIAA0963</i>  | -5.575 | 74  | 88  | 2.91E-05 |

|            |          |        |     |     |          |
|------------|----------|--------|-----|-----|----------|
| cg08293367 | YPEL1    | -4.426 | 96  | 66  | 2.91E-05 |
| cg05403071 | SNAI1    | -4.690 | 92  | 70  | 2.91E-05 |
| cg03853987 | CHST10   | -3.608 | 56  | 106 | 2.92E-05 |
| cg07306197 | ZNF266   | -5.920 | 54  | 108 | 2.92E-05 |
| cg20612615 | PREP     | -4.963 | 85  | 77  | 2.92E-05 |
| cg17302852 | FXR1     | -4.705 | 80  | 82  | 2.93E-05 |
| cg04730731 | GEMIN5   | -5.029 | 74  | 88  | 2.93E-05 |
| cg07940485 | SLC16A10 | -6.336 | 88  | 74  | 2.95E-05 |
| cg10247268 | PFKP     | -5.209 | 85  | 77  | 2.95E-05 |
| cg07172280 | DPP7     | -5.004 | 70  | 92  | 2.96E-05 |
| cg10488637 | ZNF180   | -4.692 | 73  | 89  | 2.96E-05 |
| cg01092561 | PPP1R3B  | -5.095 | 103 | 59  | 2.96E-05 |
| cg01692815 | AP3B1    | -4.875 | 100 | 62  | 2.96E-05 |
| cg07070934 | GJA4     | -3.907 | 68  | 94  | 2.96E-05 |
| cg10186308 | CALCOCO1 | -5.501 | 54  | 108 | 2.96E-05 |
| cg15875120 | C10orf97 | -4.809 | 97  | 65  | 2.96E-05 |
| cg24555600 | DHRS4    | -4.828 | 95  | 67  | 2.96E-05 |
| cg26024206 | ZNF282   | -4.849 | 98  | 64  | 2.96E-05 |
| cg07155664 | RPS14    | -5.362 | 69  | 93  | 2.96E-05 |
| cg00485296 | NME3     | -6.195 | 66  | 96  | 2.97E-05 |
| cg02238826 | B3GNT5   | -5.689 | 80  | 82  | 2.98E-05 |
| cg25954354 | C9orf58  | -3.506 | 76  | 86  | 2.98E-05 |
| cg23492043 | ASTN     | -3.015 | 88  | 74  | 2.98E-05 |
| cg26750139 | ACBD6    | -5.591 | 43  | 119 | 2.98E-05 |
| cg13226172 | CNTFR    | -4.885 | 44  | 118 | 2.98E-05 |
| cg23381116 | PSME2    | -5.678 | 52  | 110 | 2.98E-05 |
| cg20932765 | TRIM33   | -4.255 | 105 | 57  | 2.98E-05 |
| cg22229034 | DUSP1    | -5.667 | 59  | 103 | 2.98E-05 |
| cg10318443 | RNMTL1   | -5.420 | 35  | 127 | 2.98E-05 |
| cg02513045 | C21orf2  | -5.684 | 77  | 85  | 2.99E-05 |
| cg26864028 | EPOR     | -4.558 | 115 | 47  | 2.99E-05 |
| cg09128050 | SAMHD1   | -5.147 | 53  | 109 | 2.99E-05 |
| cg26149738 | KCTD15   | -3.049 | 52  | 110 | 3.00E-05 |
| cg26421123 | COMMD5   | -4.621 | 37  | 125 | 3.00E-05 |
| cg12333095 | ANKRD13  | -5.074 | 92  | 70  | 3.00E-05 |
| cg04197135 | MGC11102 | -5.183 | 70  | 92  | 3.00E-05 |
| cg21348691 | DUS2L    | -4.886 | 76  | 86  | 3.00E-05 |
| cg08793459 | PTRH2    | -5.377 | 130 | 32  | 3.01E-05 |
| cg10770529 | ZNF274   | -5.150 | 101 | 61  | 3.01E-05 |
| cg12044889 | NQO2     | -4.896 | 67  | 95  | 3.01E-05 |
| cg12484193 | DUSP19   | -5.536 | 100 | 62  | 3.01E-05 |
| cg15785580 | BCKDK    | -5.684 | 92  | 70  | 3.01E-05 |
| cg06958034 | AOF2     | -5.344 | 57  | 105 | 3.01E-05 |
| cg22449795 | USP30    | -5.146 | 78  | 84  | 3.01E-05 |
| cg18089145 | SEC23A   | -4.515 | 54  | 108 | 3.02E-05 |
| cg08197122 | DCC1     | -4.568 | 87  | 75  | 3.02E-05 |
| cg08585897 | TERF2IP  | -0.825 | 79  | 83  | 3.02E-05 |
| cg21609430 | FAM62A   | -6.087 | 87  | 75  | 3.03E-05 |
| cg04520084 | CCNC     | -5.299 | 95  | 67  | 3.03E-05 |
| cg14750190 | CCDC44   | -5.045 | 60  | 102 | 3.03E-05 |
| cg21944757 | ARFGAP1  | -5.283 | 74  | 88  | 3.04E-05 |
| cg02551396 | JPH2     | -4.209 | 71  | 91  | 3.04E-05 |
| cg23045373 | C8orf13  | -5.617 | 87  | 75  | 3.04E-05 |
| cg25002911 | RB1      | 1.815  | 79  | 83  | 3.04E-05 |
| cg27402949 | FLJ20097 | -5.107 | 105 | 57  | 3.04E-05 |

|            |                  |        |     |     |          |
|------------|------------------|--------|-----|-----|----------|
| cg09588210 | <i>FLJ39739</i>  | -2.019 | 62  | 100 | 3.05E-05 |
| cg12279128 | <i>C22orf16</i>  | -3.995 | 74  | 88  | 3.05E-05 |
| cg26670626 | <i>ZKSCAN1</i>   | -5.277 | 52  | 110 | 3.05E-05 |
| cg23282771 | <i>ASS</i>       | -4.515 | 94  | 68  | 3.05E-05 |
| cg09739907 | <i>NAPE-PLD</i>  | -4.877 | 50  | 112 | 3.06E-05 |
| cg05916783 | <i>GAN</i>       | -4.717 | 37  | 125 | 3.06E-05 |
| cg13407883 | <i>SIGLEC9</i>   | 1.691  | 74  | 88  | 3.06E-05 |
| cg03594044 | <i>FUT10</i>     | -5.615 | 66  | 96  | 3.07E-05 |
| cg13843603 | <i>PSMD11</i>    | -4.822 | 86  | 76  | 3.07E-05 |
| cg19546781 | <i>CCL17</i>     | 2.945  | 79  | 83  | 3.08E-05 |
| cg20426860 | <i>FLJ20422</i>  | -1.520 | 90  | 72  | 3.08E-05 |
| cg00882832 | <i>SPRY1</i>     | -4.515 | 65  | 97  | 3.08E-05 |
| cg12937807 | <i>LPHN1</i>     | -4.935 | 95  | 67  | 3.08E-05 |
| cg14873135 | <i>TARS</i>      | -4.532 | 53  | 109 | 3.08E-05 |
| cg17582777 | <i>EFNA3</i>     | 1.635  | 78  | 84  | 3.08E-05 |
| cg20760063 | <i>NBR2</i>      | -4.859 | 125 | 37  | 3.08E-05 |
| cg22563697 | <i>PPP1R16A</i>  | 2.580  | 89  | 73  | 3.08E-05 |
| cg11843760 | <i>DFFA</i>      | -5.413 | 35  | 127 | 3.08E-05 |
| cg14134153 | <i>RPL26L1</i>   | -2.393 | 64  | 98  | 3.08E-05 |
| cg09989134 | <i>C12orf44</i>  | -5.944 | 69  | 93  | 3.10E-05 |
| cg04941721 | <i>EREG</i>      | -4.042 | 88  | 74  | 3.10E-05 |
| cg09080746 | <i>PTHB1</i>     | -4.927 | 104 | 58  | 3.10E-05 |
| cg18950617 | <i>HMHA1</i>     | -5.893 | 115 | 47  | 3.10E-05 |
| cg14520511 | <i>KRIT1</i>     | -5.500 | 93  | 69  | 3.10E-05 |
| cg17066382 | <i>LMBR1L</i>    | -4.844 | 41  | 121 | 3.10E-05 |
| cg17468841 | <i>CBLB</i>      | -6.074 | 76  | 86  | 3.11E-05 |
| cg01362183 | <i>MAP3K7IP2</i> | -3.658 | 77  | 85  | 3.11E-05 |
| cg17316750 | <i>FAM82C</i>    | -4.408 | 40  | 122 | 3.11E-05 |
| cg23150609 | <i>YARS</i>      | -5.813 | 44  | 118 | 3.11E-05 |
| cg07068998 | <i>NRAS</i>      | -3.886 | 51  | 111 | 3.12E-05 |
| cg23091824 | <i>SLC12A7</i>   | -3.875 | 56  | 106 | 3.12E-05 |
| cg15965510 | <i>BTAF1</i>     | -4.430 | 33  | 129 | 3.12E-05 |
| cg08653874 | <i>SFRS5</i>     | -4.775 | 105 | 57  | 3.14E-05 |
| cg00098162 | <i>ANKRD22</i>   | 2.230  | 50  | 112 | 3.15E-05 |
| cg16417437 | <i>TMEM126A</i>  | -3.994 | 60  | 102 | 3.15E-05 |
| cg19853229 | <i>PLEKHG2</i>   | -4.990 | 64  | 98  | 3.15E-05 |
| cg21171373 | <i>WDR5B</i>     | -5.422 | 52  | 110 | 3.16E-05 |
| cg11178443 | <i>RANGNRF</i>   | -5.279 | 52  | 110 | 3.16E-05 |
| cg19747852 | <i>TRA2A</i>     | -4.720 | 102 | 60  | 3.16E-05 |
| cg20289988 | <i>NFIA</i>      | -4.148 | 88  | 74  | 3.18E-05 |
| cg18611281 | <i>ZNF512</i>    | -3.240 | 45  | 117 | 3.18E-05 |
| cg17687282 | <i>A4GNT</i>     | 1.664  | 87  | 75  | 3.18E-05 |
| cg18428373 | <i>FRMPD1</i>    | -5.211 | 79  | 83  | 3.18E-05 |
| cg03853151 | <i>OAT</i>       | -5.603 | 51  | 111 | 3.19E-05 |
| cg04991214 | <i>PFDN2</i>     | 2.420  | 80  | 82  | 3.19E-05 |
| cg03402775 | <i>DZIP3</i>     | -4.897 | 39  | 123 | 3.19E-05 |
| cg08996521 | <i>CISH</i>      | -4.333 | 92  | 70  | 3.19E-05 |
| cg17669700 | <i>NDUFS7</i>    | -5.333 | 44  | 118 | 3.19E-05 |
| cg03700462 | <i>HOXA1</i>     | -4.387 | 99  | 63  | 3.20E-05 |
| cg16771596 | <i>C9orf30</i>   | -4.582 | 123 | 39  | 3.20E-05 |
| cg20728639 | <i>ABTB2</i>     | -5.604 | 102 | 60  | 3.20E-05 |
| cg05742308 | <i>SEMA3A</i>    | -4.468 | 45  | 117 | 3.20E-05 |
| cg03752689 | <i>C1orf74</i>   | -4.447 | 96  | 66  | 3.20E-05 |
| cg09953122 | <i>CST8</i>      | 3.444  | 47  | 115 | 3.20E-05 |
| cg08367838 | <i>YIPF5</i>     | -3.689 | 47  | 115 | 3.21E-05 |

|            |                  |        |     |     |          |
|------------|------------------|--------|-----|-----|----------|
| cg17655576 | <i>PIAS4</i>     | -5.340 | 41  | 121 | 3.21E-05 |
| cg10313093 | <i>TPARL</i>     | -4.977 | 63  | 99  | 3.22E-05 |
| cg10698549 | <i>SRRM1</i>     | -5.318 | 58  | 104 | 3.22E-05 |
| cg16334840 | <i>SCLY</i>      | -3.897 | 58  | 104 | 3.22E-05 |
| cg08959992 | <i>PCBP2</i>     | -3.723 | 76  | 86  | 3.24E-05 |
| cg13179983 | <i>PIK3R2</i>    | -5.610 | 68  | 94  | 3.24E-05 |
| cg14172532 | <i>STK25</i>     | -5.422 | 58  | 104 | 3.24E-05 |
| cg20391984 | <i>CAMK2D</i>    | -5.896 | 47  | 115 | 3.24E-05 |
| cg07053469 | <i>EID-3</i>     | -5.406 | 65  | 97  | 3.24E-05 |
| cg21129531 | <i>LRRC4</i>     | 1.776  | 13  | 149 | 3.24E-05 |
| cg25675349 | <i>TEX264</i>    | -5.660 | 73  | 89  | 3.26E-05 |
| cg21663122 | <i>HIST1H2BH</i> | -4.114 | 83  | 79  | 3.26E-05 |
| cg10871523 | <i>FLJ30655</i>  | -5.657 | 45  | 117 | 3.28E-05 |
| cg23916845 | <i>DFNB31</i>    | -4.478 | 68  | 94  | 3.28E-05 |
| cg09058381 | <i>EAFF1</i>     | -4.603 | 79  | 83  | 3.28E-05 |
| cg06393290 | <i>FGFRL1</i>    | -5.100 | 62  | 100 | 3.29E-05 |
| cg23248865 | <i>SEMA4C</i>    | -5.198 | 53  | 109 | 3.29E-05 |
| cg00453193 | <i>TES</i>       | -4.278 | 58  | 104 | 3.29E-05 |
| cg17022914 | <i>BATF2</i>     | -4.413 | 77  | 85  | 3.29E-05 |
| cg20808145 | <i>KLC2</i>      | -5.055 | 89  | 73  | 3.29E-05 |
| cg16750914 | <i>KIAA1212</i>  | -5.431 | 103 | 59  | 3.30E-05 |
| cg06893980 | <i>PSMB1</i>     | -5.036 | 56  | 106 | 3.30E-05 |
| cg03529436 | <i>ORF1-FL49</i> | -5.082 | 62  | 100 | 3.31E-05 |
| cg14470209 | <i>ACAD9</i>     | -5.419 | 50  | 112 | 3.31E-05 |
| cg13510327 | <i>NEU1</i>      | -4.876 | 77  | 85  | 3.32E-05 |
| cg11208880 | <i>LRRC8D</i>    | -5.615 | 82  | 80  | 3.32E-05 |
| cg14545899 | <i>FAM46C</i>    | -5.529 | 70  | 92  | 3.32E-05 |
| cg11468711 | <i>ZNF710</i>    | -5.796 | 79  | 83  | 3.33E-05 |
| cg16870320 | <i>GALNT4</i>    | -5.560 | 56  | 106 | 3.34E-05 |
| cg18085206 | <i>CRK</i>       | -6.233 | 57  | 105 | 3.34E-05 |
| cg24251035 | <i>MGC14289</i>  | -1.410 | 59  | 103 | 3.34E-05 |
| cg07430605 | <i>BRD8</i>      | -4.963 | 56  | 103 | 3.35E-05 |
| cg01454004 | <i>SLC17A5</i>   | -4.416 | 59  | 103 | 3.35E-05 |
| cg14285013 | <i>MYBL1</i>     | -4.179 | 57  | 105 | 3.35E-05 |
| cg09600437 | <i>REL</i>       | -4.882 | 55  | 107 | 3.35E-05 |
| cg23877786 | <i>RPL13</i>     | -3.908 | 102 | 60  | 3.36E-05 |
| cg13864877 | <i>OPTN</i>      | -5.219 | 80  | 82  | 3.36E-05 |
| cg19082446 | <i>SGK3</i>      | -1.941 | 59  | 103 | 3.37E-05 |
| cg20884697 | <i>MANEA</i>     | -4.711 | 91  | 71  | 3.37E-05 |
| cg12726576 | <i>CTGLF1</i>    | 1.420  | 107 | 55  | 3.37E-05 |
| cg19976011 | <i>44089</i>     | -5.493 | 45  | 117 | 3.37E-05 |
| cg11786750 | <i>DYNC1LI1</i>  | -4.602 | 54  | 108 | 3.38E-05 |
| cg05946081 | <i>RBMXL1</i>    | -5.121 | 37  | 125 | 3.38E-05 |
| cg03664800 | <i>LOXL2</i>     | -3.736 | 72  | 90  | 3.38E-05 |
| cg08783491 | <i>STX16</i>     | -4.500 | 86  | 76  | 3.39E-05 |
| cg15492104 | <i>C14orf44</i>  | -5.129 | 94  | 68  | 3.39E-05 |
| cg24267801 | <i>COX6C</i>     | -4.317 | 91  | 71  | 3.39E-05 |
| cg04600076 | <i>FAM60A</i>    | -4.276 | 69  | 93  | 3.40E-05 |
| cg16233911 | <i>THOC3</i>     | -5.140 | 112 | 50  | 3.43E-05 |
| cg26560960 | <i>CBWD2</i>     | -4.287 | 72  | 90  | 3.43E-05 |
| cg22630160 | <i>HIST1H2AB</i> | -4.240 | 54  | 108 | 3.43E-05 |
| cg21475255 | <i>DAG1</i>      | -5.283 | 99  | 63  | 3.43E-05 |
| cg14269514 | <i>MRPL9</i>     | -4.951 | 88  | 74  | 3.43E-05 |
| cg25467043 | <i>THAP6</i>     | -4.589 | 94  | 68  | 3.44E-05 |
| cg03371306 | <i>FBXW7</i>     | -5.062 | 70  | 92  | 3.44E-05 |

|            |                  |        |     |     |          |
|------------|------------------|--------|-----|-----|----------|
| cg08028004 | <i>RANBP2</i>    | -1.778 | 78  | 84  | 3.44E-05 |
| cg19822214 | <i>CNOT3</i>     | -4.459 | 83  | 79  | 3.46E-05 |
| cg16861508 | <i>TNFRSF10B</i> | -5.459 | 46  | 116 | 3.46E-05 |
| cg26798786 | <i>KLF9</i>      | -4.445 | 39  | 123 | 3.46E-05 |
| cg02273078 | <i>USP14</i>     | -6.632 | 98  | 64  | 3.47E-05 |
| cg07884474 | <i>VPS16</i>     | -5.477 | 70  | 92  | 3.47E-05 |
| cg18779060 | <i>DYRK1A</i>    | -3.963 | 87  | 75  | 3.47E-05 |
| cg04738091 | <i>PTEN</i>      | -5.348 | 71  | 91  | 3.48E-05 |
| cg18565479 | <i>DISC1</i>     | -5.443 | 51  | 111 | 3.49E-05 |
| cg26928682 | <i>TREML2</i>    | 1.496  | 74  | 88  | 3.49E-05 |
| cg17651255 | <i>SYF2</i>      | -3.367 | 69  | 93  | 3.50E-05 |
| cg24204740 | <i>RWDD2</i>     | -4.297 | 37  | 125 | 3.50E-05 |
| cg01900048 | <i>SFT2D3</i>    | -4.574 | 107 | 55  | 3.50E-05 |
| cg07924819 | <i>ATF6</i>      | -5.010 | 113 | 49  | 3.50E-05 |
| cg01911082 | <i>CSMD3</i>     | -4.296 | 83  | 79  | 3.52E-05 |
| cg13982661 | <i>SC5DL</i>     | -4.823 | 98  | 64  | 3.52E-05 |
| cg26357744 | <i>RASSF1</i>    | -4.283 | 89  | 73  | 3.52E-05 |
| cg12790134 | <i>VCPIP1</i>    | -5.098 | 59  | 103 | 3.52E-05 |
| cg23401756 | <i>DPEP3</i>     | 5.310  | 72  | 90  | 3.53E-05 |
| cg14002682 | <i>RBJ</i>       | -5.339 | 56  | 106 | 3.53E-05 |
| cg21372397 | <i>HIC2</i>      | -6.057 | 62  | 100 | 3.54E-05 |
| cg20695057 | <i>TP53BP2</i>   | -4.900 | 29  | 133 | 3.55E-05 |
| cg11177955 | <i>C1orf58</i>   | -5.459 | 40  | 122 | 3.56E-05 |
| cg12548454 | <i>PSAT1</i>     | -3.889 | 93  | 69  | 3.56E-05 |
| cg02609749 | <i>ZNF276</i>    | -3.307 | 85  | 77  | 3.56E-05 |
| cg11550426 | <i>SDCBP</i>     | -5.072 | 89  | 73  | 3.56E-05 |
| cg20172280 | <i>OLFML2B</i>   | -4.595 | 106 | 56  | 3.57E-05 |
| cg14083376 | <i>C14orf2</i>   | -5.509 | 53  | 109 | 3.57E-05 |
| cg23182539 | <i>TIAL1</i>     | -5.119 | 85  | 77  | 3.58E-05 |
| cg05055720 | <i>RHOA</i>      | -4.820 | 108 | 54  | 3.58E-05 |
| cg27207041 | <i>WDR50</i>     | -4.199 | 119 | 43  | 3.58E-05 |
| cg25658980 | <i>FLJ20643</i>  | -4.737 | 88  | 74  | 3.58E-05 |
| cg03073814 | <i>TTC19</i>     | -4.129 | 45  | 117 | 3.59E-05 |
| cg22984616 | <i>BAG2</i>      | -5.572 | 51  | 111 | 3.60E-05 |
| cg04473302 | <i>SLC26A4</i>   | -4.864 | 98  | 64  | 3.60E-05 |
| cg12435758 | <i>LGI2</i>      | -5.148 | 79  | 83  | 3.60E-05 |
| cg01651364 | <i>FLJ23518</i>  | -5.353 | 49  | 113 | 3.62E-05 |
| cg18540305 | <i>TMCO3</i>     | -6.298 | 85  | 77  | 3.62E-05 |
| cg09405083 | <i>C10orf26</i>  | -3.400 | 87  | 75  | 3.62E-05 |
| cg17725461 | <i>RFX1</i>      | -5.788 | 63  | 99  | 3.63E-05 |
| cg21351102 | <i>MRCL3</i>     | -4.675 | 82  | 80  | 3.63E-05 |
| cg21979032 | <i>CYP8B1</i>    | 2.293  | 85  | 77  | 3.63E-05 |
| cg05433460 | <i>ZNF408</i>    | 2.557  | 72  | 89  | 3.63E-05 |
| cg01929065 | <i>CD63</i>      | -5.864 | 51  | 111 | 3.63E-05 |
| cg00728602 | <i>C6orf27</i>   | -4.726 | 59  | 103 | 3.64E-05 |
| cg15311933 | <i>PQLC2</i>     | -5.545 | 80  | 82  | 3.64E-05 |
| cg14915263 | <i>PTPN1</i>     | -6.473 | 84  | 78  | 3.65E-05 |
| cg13951948 | <i>MGC2474</i>   | -5.856 | 63  | 99  | 3.65E-05 |
| cg03708463 | <i>RNASEH1</i>   | -4.804 | 33  | 129 | 3.65E-05 |
| cg08733774 | <i>RANBP2</i>    | -4.251 | 61  | 101 | 3.66E-05 |
| cg15250797 | <i>SCTR</i>      | -2.761 | 129 | 33  | 3.66E-05 |
| cg19098268 | <i>PEG3</i>      | 1.142  | 94  | 68  | 3.66E-05 |
| cg19632206 | <i>FAM5C</i>     | -2.997 | 98  | 64  | 3.66E-05 |
| cg12448934 | <i>CLSTN3</i>    | -5.268 | 101 | 61  | 3.67E-05 |
| cg19639622 | <i>GPM6A</i>     | -4.632 | 76  | 86  | 3.68E-05 |

|            |                 |        |     |     |          |
|------------|-----------------|--------|-----|-----|----------|
| cg01407341 | <i>SPATA8</i>   | 3.097  | 77  | 85  | 3.68E-05 |
| cg12320306 | <i>ADM</i>      | -4.246 | 81  | 81  | 3.68E-05 |
| cg19130550 | <i>OLFML2B</i>  | -4.387 | 75  | 87  | 3.68E-05 |
| cg12743894 | <i>C11orf46</i> | -6.756 | 53  | 109 | 3.69E-05 |
| cg06428195 | <i>GOT1</i>     | -5.469 | 60  | 102 | 3.69E-05 |
| cg13278334 | <i>FLJ20643</i> | -3.910 | 79  | 83  | 3.69E-05 |
| cg06510830 | <i>C21orf45</i> | -5.537 | 81  | 81  | 3.71E-05 |
| cg13250711 | <i>ARNTL</i>    | -3.688 | 93  | 69  | 3.71E-05 |
| cg15815016 | <i>CARD4</i>    | -4.809 | 81  | 81  | 3.71E-05 |
| cg21657816 | <i>COQ7</i>     | -5.765 | 101 | 61  | 3.71E-05 |
| cg01505176 | <i>VAR5</i>     | -5.980 | 63  | 99  | 3.71E-05 |
| cg06211871 | <i>ZNF684</i>   | -4.673 | 84  | 78  | 3.71E-05 |
| cg23807009 | <i>MDM4</i>     | -5.110 | 78  | 84  | 3.71E-05 |
| cg05754589 | <i>CBX5</i>     | -4.674 | 87  | 75  | 3.72E-05 |
| cg02113971 | <i>FLJ20859</i> | -4.555 | 89  | 73  | 3.72E-05 |
| cg02154074 | <i>HTRA2</i>    | -4.896 | 71  | 91  | 3.72E-05 |
| cg05463705 | <i>ZNF143</i>   | -5.167 | 56  | 106 | 3.72E-05 |
| cg17802847 | <i>CFLAR</i>    | -4.931 | 62  | 100 | 3.72E-05 |
| cg00893636 | <i>EPM2AIP1</i> | -4.529 | 83  | 79  | 3.72E-05 |
| cg03029060 | <i>ZNF184</i>   | -4.817 | 78  | 84  | 3.72E-05 |
| cg09866173 | <i>HIST2H4</i>  | -5.707 | 47  | 115 | 3.72E-05 |
| cg17834443 | <i>C8orf35</i>  | -5.274 | 45  | 117 | 3.72E-05 |
| cg26240353 | <i>LTA4H</i>    | -5.384 | 94  | 68  | 3.72E-05 |
| cg16385933 | <i>PDCD4</i>    | -5.550 | 48  | 114 | 3.73E-05 |
| cg24494556 | <i>ZNF11B</i>   | -5.334 | 47  | 115 | 3.74E-05 |
| cg20506766 | <i>MFN1</i>     | -5.236 | 62  | 100 | 3.74E-05 |
| cg25759517 | <i>PYCR1</i>    | -4.925 | 64  | 98  | 3.75E-05 |
| cg13387232 | <i>FLJ34443</i> | 3.049  | 72  | 90  | 3.77E-05 |
| cg23179321 | <i>RPP38</i>    | -4.744 | 98  | 64  | 3.77E-05 |
| cg05761032 | <i>CCPG1</i>    | -5.052 | 114 | 48  | 3.77E-05 |
| cg25682936 | <i>SF3A3</i>    | -2.576 | 96  | 66  | 3.78E-05 |
| cg04518155 | <i>FLJ20534</i> | -4.786 | 69  | 93  | 3.78E-05 |
| cg05388361 | <i>STAT2</i>    | -5.533 | 50  | 112 | 3.78E-05 |
| cg23269225 | <i>FBXL4</i>    | -5.610 | 64  | 98  | 3.78E-05 |
| cg18805835 | <i>DNAJC18</i>  | -2.438 | 104 | 58  | 3.81E-05 |
| cg00397740 | <i>PPOX</i>     | -4.332 | 94  | 68  | 3.81E-05 |
| cg00585846 | <i>NFKBIL1</i>  | -4.186 | 65  | 97  | 3.81E-05 |
| cg02556718 | <i>SEZ6L2</i>   | -4.670 | 61  | 101 | 3.81E-05 |
| cg10740670 | <i>FNTB</i>     | -4.969 | 65  | 97  | 3.81E-05 |
| cg07200280 | <i>RAFTLIN</i>  | -5.127 | 63  | 99  | 3.82E-05 |
| cg17889103 | <i>UQCRB</i>    | -4.934 | 55  | 107 | 3.82E-05 |
| cg08618113 | <i>CHP</i>      | -3.914 | 79  | 83  | 3.83E-05 |
| cg23588893 | <i>FUT11</i>    | -4.576 | 63  | 99  | 3.84E-05 |
| cg26299767 | <i>REM1</i>     | -3.450 | 101 | 61  | 3.84E-05 |
| cg14159818 | <i>C20orf27</i> | -5.880 | 97  | 65  | 3.84E-05 |
| cg26812418 | <i>CPE</i>      | -4.414 | 50  | 112 | 3.85E-05 |
| cg06096336 | <i>HTR2B</i>    | -0.195 | 90  | 72  | 3.85E-05 |
| cg18109231 | <i>RFX2</i>     | -4.671 | 56  | 106 | 3.85E-05 |
| cg21902119 | <i>VAT1</i>     | -5.580 | 97  | 65  | 3.85E-05 |
| cg22388943 | <i>EIF5</i>     | -5.244 | 110 | 52  | 3.86E-05 |
| cg12736438 | <i>RAB20</i>    | -5.045 | 81  | 81  | 3.86E-05 |
| cg01924619 | <i>B4GALT5</i>  | -6.117 | 60  | 102 | 3.88E-05 |
| cg05923103 | <i>RNF11</i>    | -4.704 | 59  | 103 | 3.88E-05 |
| cg10302026 | <i>STRN4</i>    | -5.297 | 93  | 69  | 3.88E-05 |
| cg21341807 | <i>RABL4</i>    | -5.611 | 82  | 80  | 3.89E-05 |

|            |           |        |     |     |          |
|------------|-----------|--------|-----|-----|----------|
| cg25892434 | ADK       | -4.704 | 67  | 95  | 3.89E-05 |
| cg23235603 | CDC2L6    | -5.033 | 88  | 74  | 3.90E-05 |
| cg21255605 | NR2C2     | -3.314 | 64  | 98  | 3.91E-05 |
| cg26359204 | NKX6-1    | -4.985 | 92  | 70  | 3.91E-05 |
| cg25413757 | C1orf75   | -5.154 | 38  | 124 | 3.92E-05 |
| cg09307279 | GLT8D1    | -6.016 | 62  | 100 | 3.92E-05 |
| cg09498379 | NEDD4     | -6.871 | 62  | 100 | 3.92E-05 |
| cg14679587 | GLS2      | -4.163 | 71  | 91  | 3.92E-05 |
| cg10149329 | MGC33302  | -4.298 | 91  | 71  | 3.93E-05 |
| cg08441806 | NKX6-2    | -0.463 | 9   | 153 | 3.93E-05 |
| cg21684385 | PEX3      | -4.763 | 38  | 124 | 3.94E-05 |
| cg19791277 | KHDRBS3   | -6.226 | 54  | 108 | 3.94E-05 |
| cg24618244 | INPP5F    | -5.278 | 73  | 89  | 3.95E-05 |
| cg24889744 | C20orf28  | -3.430 | 108 | 54  | 3.95E-05 |
| cg05475904 | BCL10     | 4.782  | 121 | 41  | 3.95E-05 |
| cg02569086 | ITPR2     | -5.030 | 89  | 73  | 3.95E-05 |
| cg23320056 | ARHGEF2   | -3.392 | 61  | 101 | 3.95E-05 |
| cg12723191 | PDC       | 2.547  | 119 | 43  | 3.95E-05 |
| cg10539712 | LYN       | -4.144 | 108 | 54  | 3.98E-05 |
| cg22451189 | MRPS22    | -5.060 | 43  | 119 | 3.98E-05 |
| cg27218220 | TTLL11    | 2.602  | 71  | 91  | 3.99E-05 |
| cg18394496 | LOC374395 | -6.098 | 39  | 123 | 4.00E-05 |
| cg25543604 | EID-3     | -5.692 | 44  | 118 | 4.01E-05 |
| cg06218044 | PREP      | -4.729 | 72  | 90  | 4.01E-05 |
| cg12256080 | ABT1      | -4.366 | 51  | 111 | 4.01E-05 |
| cg19948014 | SOD1      | -5.141 | 41  | 121 | 4.01E-05 |
| cg10965432 | FTS       | -5.561 | 45  | 117 | 4.02E-05 |
| cg12382902 | CCND2     | -5.481 | 78  | 84  | 4.02E-05 |
| cg05879334 | ACAT2     | -6.124 | 35  | 127 | 4.02E-05 |
| cg13744070 | FLJ20487  | -4.915 | 84  | 78  | 4.04E-05 |
| cg03756121 | ARFIP2    | -3.984 | 94  | 68  | 4.04E-05 |
| cg02886284 | CPE       | -5.103 | 58  | 104 | 4.06E-05 |
| cg10467681 | ANAPC2    | -4.960 | 116 | 46  | 4.06E-05 |
| cg11928635 | ZNF318    | -5.275 | 112 | 50  | 4.07E-05 |
| cg21280384 | BXDC5     | -4.549 | 67  | 95  | 4.07E-05 |
| cg06712026 | CSTF2T    | -4.554 | 55  | 106 | 4.07E-05 |
| cg18773223 | TBC1D13   | -4.037 | 69  | 93  | 4.07E-05 |
| cg01959004 | HYOU1     | -5.450 | 76  | 85  | 4.08E-05 |
| cg02252907 | AP3D1     | -4.744 | 43  | 119 | 4.08E-05 |
| cg21859434 | CXCR4     | -5.936 | 73  | 89  | 4.08E-05 |
| cg04790936 | SH3BP1    | -5.889 | 52  | 110 | 4.09E-05 |
| cg18464559 | ITGB3BP   | -5.724 | 51  | 111 | 4.09E-05 |
| cg10265786 | DOM3Z     | -5.472 | 85  | 77  | 4.09E-05 |
| cg08039281 | PSMA6     | -4.183 | 96  | 66  | 4.09E-05 |
| cg09194436 | ALDH6A1   | -5.458 | 53  | 109 | 4.09E-05 |
| cg21336547 | AKAP8     | -5.627 | 61  | 101 | 4.09E-05 |
| cg27012203 | MTHFR     | -5.150 | 57  | 105 | 4.10E-05 |
| cg20315951 | OVOL1     | -4.727 | 112 | 50  | 4.10E-05 |
| cg21132104 | SPATA5L1  | -4.564 | 56  | 106 | 4.10E-05 |
| cg15612927 | RAD52     | -3.896 | 59  | 103 | 4.11E-05 |
| cg10002561 | CCNA2     | -6.043 | 77  | 85  | 4.12E-05 |
| cg06468695 | CCDC42    | 1.998  | 108 | 54  | 4.12E-05 |
| cg18978324 | RABGGTA   | -5.286 | 61  | 101 | 4.12E-05 |
| cg22377998 | ARVCF     | -3.147 | 88  | 74  | 4.12E-05 |
| cg19857457 | RPL17     | -5.085 | 70  | 92  | 4.12E-05 |

|            |                  |        |     |     |          |
|------------|------------------|--------|-----|-----|----------|
| cg14408969 | <i>C8orf40</i>   | -4.641 | 85  | 77  | 4.13E-05 |
| cg25425005 | <i>HBZ</i>       | 2.855  | 81  | 81  | 4.13E-05 |
| cg03812067 | <i>SERINC3</i>   | -4.214 | 59  | 103 | 4.14E-05 |
| cg15041659 | <i>ZBTB40</i>    | -5.293 | 119 | 43  | 4.14E-05 |
| cg07619076 | <i>LANCL2</i>    | -2.855 | 55  | 105 | 4.14E-05 |
| cg20304401 | <i>PABPC1</i>    | -2.410 | 95  | 67  | 4.15E-05 |
| cg21658946 | <i>PDF</i>       | -5.667 | 81  | 81  | 4.15E-05 |
| cg00128766 | <i>KIAA0494</i>  | -3.443 | 113 | 49  | 4.15E-05 |
| cg15966253 | <i>UBE2E1</i>    | -4.591 | 22  | 140 | 4.17E-05 |
| cg25881193 | <i>BTN2A2</i>    | -3.139 | 83  | 79  | 4.17E-05 |
| cg15569512 | <i>C14orf153</i> | -5.145 | 88  | 74  | 4.17E-05 |
| cg05795157 | <i>PIAS3</i>     | -4.802 | 110 | 52  | 4.17E-05 |
| cg04005725 | <i>KLHDC8B</i>   | -5.630 | 76  | 86  | 4.18E-05 |
| cg05045528 | <i>GPR107</i>    | -4.461 | 116 | 46  | 4.18E-05 |
| cg20047230 | <i>CP110</i>     | -2.705 | 90  | 72  | 4.18E-05 |
| cg17129141 | <i>MSH2</i>      | -4.166 | 107 | 55  | 4.19E-05 |
| cg21120786 | <i>SCAP2</i>     | -2.955 | 97  | 65  | 4.19E-05 |
| cg02344238 | <i>FKSG44</i>    | -4.521 | 65  | 97  | 4.20E-05 |
| cg15705469 | <i>ZNF71</i>     | -4.835 | 44  | 118 | 4.20E-05 |
| cg11585425 | <i>ACTR2</i>     | -5.810 | 116 | 46  | 4.21E-05 |
| cg11035216 | <i>RASSF1</i>    | -6.027 | 43  | 119 | 4.21E-05 |
| cg20442709 | <i>C1orf9</i>    | -5.299 | 67  | 95  | 4.21E-05 |
| cg06880557 | <i>LOC93081</i>  | -4.832 | 64  | 98  | 4.22E-05 |
| cg26609691 | <i>CHFR</i>      | 5.248  | 119 | 43  | 4.22E-05 |
| cg12561748 | <i>ZNF307</i>    | -5.638 | 43  | 119 | 4.22E-05 |
| cg06606198 | <i>DDX55</i>     | -5.818 | 60  | 102 | 4.23E-05 |
| cg05668720 | <i>TUBE1</i>     | -5.297 | 58  | 104 | 4.24E-05 |
| cg05600174 | <i>C9orf95</i>   | -3.822 | 119 | 43  | 4.24E-05 |
| cg20966551 | <i>MAST1</i>     | -5.041 | 79  | 83  | 4.24E-05 |
| cg03296929 | <i>IBSP</i>      | -2.042 | 88  | 74  | 4.24E-05 |
| cg11029501 | <i>TARBP1</i>    | -6.064 | 47  | 115 | 4.24E-05 |
| cg14916200 | <i>HIC2</i>      | -5.757 | 68  | 94  | 4.25E-05 |
| cg19425528 | <i>KIF1C</i>     | -3.966 | 106 | 56  | 4.25E-05 |
| cg15315630 | <i>ZMYM6</i>     | -5.407 | 43  | 119 | 4.25E-05 |
| cg03442064 | <i>FOXP4</i>     | -2.217 | 84  | 78  | 4.25E-05 |
| cg22091798 | <i>LOC51035</i>  | -5.058 | 85  | 77  | 4.26E-05 |
| cg07067241 | <i>TRPC1</i>     | -4.721 | 66  | 96  | 4.26E-05 |
| cg11226328 | <i>EPB41</i>     | -4.141 | 51  | 111 | 4.26E-05 |
| cg15046735 | <i>C14orf156</i> | -5.831 | 48  | 114 | 4.26E-05 |
| cg16035277 | <i>SLC22A18</i>  | -2.465 | 89  | 73  | 4.26E-05 |
| cg18462653 | <i>DEFB119</i>   | 0.722  | 113 | 49  | 4.26E-05 |
| cg01593886 | <i>COL1A1</i>    | -3.549 | 79  | 83  | 4.28E-05 |
| cg05060602 | <i>DCTD</i>      | -4.828 | 90  | 72  | 4.28E-05 |
| cg20077393 | <i>CGN</i>       | -4.755 | 64  | 98  | 4.28E-05 |
| cg18534872 | <i>ZWINT</i>     | -4.786 | 60  | 102 | 4.28E-05 |
| cg21182322 | <i>POU2F1</i>    | -4.255 | 90  | 72  | 4.28E-05 |
| cg08647727 | <i>MGC50559</i>  | -3.475 | 53  | 109 | 4.28E-05 |
| cg22083639 | <i>SLCO5A1</i>   | -3.669 | 58  | 104 | 4.29E-05 |
| cg15047833 | <i>POLR2C</i>    | -4.485 | 109 | 53  | 4.29E-05 |
| cg10978402 | <i>IQGAP1</i>    | -6.043 | 53  | 109 | 4.29E-05 |
| cg15467148 | <i>PCK2</i>      | -3.561 | 142 | 20  | 4.30E-05 |
| cg03863149 | <i>ZNF644</i>    | -5.495 | 85  | 77  | 4.33E-05 |
| cg19840387 | <i>PKP4</i>      | -4.665 | 108 | 54  | 4.33E-05 |
| cg24404909 | <i>C14orf173</i> | -3.291 | 74  | 88  | 4.33E-05 |
| cg20041381 | <i>TPR</i>       | -4.823 | 100 | 62  | 4.33E-05 |

|            |                  |        |     |     |          |
|------------|------------------|--------|-----|-----|----------|
| cg13272258 | <i>USP2</i>      | -5.434 | 55  | 107 | 4.34E-05 |
| cg16959972 | <i>DMC1</i>      | -4.330 | 103 | 59  | 4.34E-05 |
| cg14755009 | <i>TIRAP</i>     | -5.403 | 52  | 110 | 4.36E-05 |
| cg13206017 | <i>SST</i>       | -2.970 | 118 | 44  | 4.36E-05 |
| cg25477928 | <i>ITSN2</i>     | -3.544 | 61  | 101 | 4.36E-05 |
| cg13208492 | <i>TSN</i>       | -5.979 | 108 | 54  | 4.36E-05 |
| cg02186948 | <i>COMMD9</i>    | -4.899 | 91  | 71  | 4.38E-05 |
| cg17963089 | <i>PHPT1</i>     | -4.305 | 60  | 102 | 4.38E-05 |
| cg05688084 | <i>KIAA0090</i>  | -4.276 | 60  | 102 | 4.39E-05 |
| cg01259619 | <i>ITPKB</i>     | -6.567 | 82  | 80  | 4.39E-05 |
| cg16362133 | <i>SLC11A2</i>   | -3.961 | 90  | 72  | 4.39E-05 |
| cg05559445 | <i>CDKN1C</i>    | -1.066 | 59  | 103 | 4.39E-05 |
| cg08872483 | <i>C9orf10</i>   | -5.252 | 59  | 103 | 4.39E-05 |
| cg04145477 | <i>QRSL1</i>     | -5.062 | 36  | 126 | 4.41E-05 |
| cg13685294 | <i>GRM2</i>      | 3.608  | 93  | 69  | 4.42E-05 |
| cg00676660 | <i>ADAMTS9</i>   | -5.140 | 83  | 79  | 4.43E-05 |
| cg04741133 | <i>LOC153684</i> | -4.623 | 116 | 46  | 4.43E-05 |
| cg08571203 | <i>FOXJ2</i>     | -5.655 | 100 | 62  | 4.43E-05 |
| cg19921776 | <i>C1orf22</i>   | -5.089 | 43  | 119 | 4.43E-05 |
| cg17429424 | <i>DUSP1</i>     | -5.763 | 53  | 109 | 4.44E-05 |
| cg17191186 | <i>PSMB6</i>     | -3.979 | 68  | 94  | 4.44E-05 |
| cg16236759 | <i>UBE2I</i>     | -5.084 | 101 | 61  | 4.44E-05 |
| cg11700429 | <i>ANAPC1</i>    | -6.403 | 61  | 101 | 4.45E-05 |
| cg09572106 | <i>PDLIM7</i>    | -5.934 | 73  | 89  | 4.46E-05 |
| cg19435409 | <i>HIST1H2AL</i> | -4.805 | 93  | 69  | 4.46E-05 |
| cg04359302 | <i>MRPL47</i>    | 2.121  | 96  | 66  | 4.46E-05 |
| cg01199721 | <i>GCN1L1</i>    | -4.492 | 60  | 102 | 4.47E-05 |
| cg27413025 | <i>CYP20A1</i>   | -1.694 | 44  | 118 | 4.47E-05 |
| cg09459188 | <i>MFSD1</i>     | -6.149 | 79  | 83  | 4.47E-05 |
| cg16854606 | <i>DAND5</i>     | 0.868  | 104 | 58  | 4.47E-05 |
| cg00215066 | <i>MYO9B</i>     | 3.859  | 80  | 82  | 4.47E-05 |
| cg01846065 | <i>STAM2</i>     | -5.196 | 66  | 96  | 4.47E-05 |
| cg04223442 | <i>NCOR1</i>     | -4.083 | 35  | 127 | 4.47E-05 |
| cg21552947 | <i>THRAP5</i>    | -5.188 | 104 | 58  | 4.47E-05 |
| cg14063008 | <i>DAB2IP</i>    | -4.740 | 39  | 123 | 4.48E-05 |
| cg21065990 | <i>TASP1</i>     | -5.892 | 60  | 102 | 4.49E-05 |
| cg25741319 | <i>FLJ32745</i>  | -4.712 | 57  | 105 | 4.49E-05 |
| cg25677688 | <i>TAS2R48</i>   | 1.872  | 92  | 70  | 4.49E-05 |
| cg26350691 | <i>ZNF646</i>    | -3.938 | 117 | 45  | 4.51E-05 |
| cg10128868 | <i>PDIA4</i>     | -4.251 | 55  | 107 | 4.51E-05 |
| cg11310692 | <i>PEX7</i>      | -5.326 | 126 | 36  | 4.51E-05 |
| cg18047509 | <i>CEP70</i>     | -4.993 | 89  | 73  | 4.51E-05 |
| cg25013058 | <i>NCOA7</i>     | -4.821 | 55  | 107 | 4.54E-05 |
| cg09507928 | <i>IK</i>        | -5.975 | 69  | 93  | 4.55E-05 |
| cg13908977 | <i>RSL1D1</i>    | -5.273 | 56  | 106 | 4.55E-05 |
| cg08825571 | <i>MAF1</i>      | -5.465 | 43  | 119 | 4.57E-05 |
| cg22907065 | <i>RHOA</i>      | -5.782 | 66  | 96  | 4.57E-05 |
| cg22269795 | <i>EFHD2</i>     | -5.891 | 64  | 98  | 4.58E-05 |
| cg24649713 | <i>C1orf86</i>   | -4.980 | 97  | 65  | 4.58E-05 |
| cg02286990 | <i>CCDC28B</i>   | -4.128 | 77  | 85  | 4.58E-05 |
| cg05923056 | <i>CHES1</i>     | -5.056 | 67  | 94  | 4.59E-05 |
| cg15002204 | <i>C6orf139</i>  | -2.950 | 120 | 42  | 4.59E-05 |
| cg16545079 | <i>PER1</i>      | -5.020 | 67  | 95  | 4.59E-05 |
| cg13281719 | <i>ATG16L1</i>   | -5.329 | 111 | 51  | 4.59E-05 |
| cg24797830 | <i>COPS6</i>     | -3.933 | 42  | 120 | 4.60E-05 |

|            |                  |        |     |     |          |
|------------|------------------|--------|-----|-----|----------|
| cg26965059 | <i>ATF2</i>      | -5.247 | 55  | 107 | 4.60E-05 |
| cg17572791 | <i>HAX1</i>      | -5.014 | 117 | 45  | 4.60E-05 |
| cg04311606 | <i>ZNF136</i>    | -5.870 | 88  | 74  | 4.61E-05 |
| cg03037331 | <i>DEGS1</i>     | -5.873 | 81  | 81  | 4.62E-05 |
| cg14837411 | <i>RAD51C</i>    | -5.662 | 76  | 86  | 4.62E-05 |
| cg16729690 | <i>FZD3</i>      | -4.429 | 118 | 44  | 4.62E-05 |
| cg03475420 | <i>RTN4R</i>     | -5.043 | 42  | 120 | 4.62E-05 |
| cg03217102 | <i>LEMD3</i>     | -3.120 | 58  | 104 | 4.62E-05 |
| cg06506156 | <i>TSSC1</i>     | -5.284 | 94  | 68  | 4.62E-05 |
| cg25192419 | <i>DOCK5</i>     | -5.741 | 83  | 79  | 4.62E-05 |
| cg13066542 | <i>RFK</i>       | -5.438 | 89  | 73  | 4.63E-05 |
| cg26436315 | <i>KLF15</i>     | -4.635 | 60  | 102 | 4.65E-05 |
| cg04491443 | <i>PDILT</i>     | 3.545  | 71  | 91  | 4.65E-05 |
| cg18152311 | <i>FAM49B</i>    | -4.392 | 49  | 113 | 4.65E-05 |
| cg19903333 | <i>ATP6V0B</i>   | -3.017 | 91  | 71  | 4.66E-05 |
| cg01376672 | <i>ANAPC5</i>    | -4.084 | 63  | 99  | 4.66E-05 |
| cg07778029 | <i>HOXA9</i>     | -3.466 | 88  | 74  | 4.67E-05 |
| cg06171242 | <i>TTRAP</i>     | -4.395 | 64  | 98  | 4.67E-05 |
| cg12785675 | <i>ARMC2</i>     | -4.333 | 107 | 55  | 4.67E-05 |
| cg21914262 | <i>MTIF3</i>     | -4.583 | 72  | 90  | 4.67E-05 |
| cg09693433 | <i>CDKL3</i>     | -4.758 | 55  | 107 | 4.68E-05 |
| cg23473726 | <i>ZNF324</i>    | -4.954 | 97  | 65  | 4.68E-05 |
| cg27212359 | <i>FRAT2</i>     | -5.336 | 73  | 89  | 4.68E-05 |
| cg21360828 | <i>CENPA</i>     | -3.707 | 92  | 70  | 4.69E-05 |
| cg25358938 | <i>TMEM66</i>    | -4.826 | 111 | 51  | 4.70E-05 |
| cg00971396 | <i>POLR2H</i>    | -4.729 | 67  | 95  | 4.72E-05 |
| cg13326338 | <i>SIL1</i>      | 4.080  | 69  | 93  | 4.72E-05 |
| cg09952620 | <i>HSPC023</i>   | -3.133 | 90  | 71  | 4.72E-05 |
| cg10007692 | <i>GPSN2</i>     | -4.025 | 124 | 38  | 4.75E-05 |
| cg00743372 | <i>ZNF192</i>    | -4.749 | 50  | 112 | 4.75E-05 |
| cg20918903 | <i>JMJD1A</i>    | -4.779 | 49  | 113 | 4.75E-05 |
| cg04197195 | <i>CCDC71</i>    | -5.251 | 42  | 120 | 4.77E-05 |
| cg11828089 | <i>CALN1</i>     | 2.885  | 85  | 77  | 4.77E-05 |
| cg04020816 | <i>MAN2A1</i>    | -5.313 | 78  | 84  | 4.78E-05 |
| cg15427567 | <i>FLJ20859</i>  | -5.044 | 86  | 76  | 4.78E-05 |
| cg08535091 | <i>LOC283932</i> | -6.486 | 52  | 110 | 4.81E-05 |
| cg17976829 | <i>TXNL2</i>     | -2.786 | 106 | 56  | 4.81E-05 |
| cg08220793 | <i>TSEN2</i>     | -5.451 | 62  | 100 | 4.81E-05 |
| cg14120336 | <i>DYNC2LI1</i>  | -4.573 | 92  | 70  | 4.81E-05 |
| cg21123573 | <i>SIRT4</i>     | -3.050 | 48  | 100 | 4.81E-05 |
| cg05612904 | <i>DPH5</i>      | -5.152 | 56  | 106 | 4.82E-05 |
| cg10146929 | <i>HIST1H1A</i>  | -1.502 | 57  | 105 | 4.82E-05 |
| cg19070798 | <i>LOC129138</i> | -5.211 | 58  | 104 | 4.82E-05 |
| cg05647526 | <i>CALU</i>      | -4.541 | 50  | 112 | 4.82E-05 |
| cg26054540 | <i>NKD2</i>      | -6.572 | 84  | 78  | 4.82E-05 |
| cg16614500 | <i>TMEM80</i>    | -3.281 | 88  | 74  | 4.83E-05 |
| cg02299653 | <i>LSM5</i>      | -4.039 | 30  | 132 | 4.83E-05 |
| cg03055492 | <i>UGP2</i>      | -6.145 | 72  | 90  | 4.84E-05 |
| cg08738040 | <i>TNRC5</i>     | -6.578 | 130 | 32  | 4.84E-05 |
| cg03430067 | <i>MGC11271</i>  | -2.611 | 98  | 64  | 4.84E-05 |
| cg08703595 | <i>FLJ22313</i>  | -3.267 | 70  | 92  | 4.84E-05 |
| cg04588079 | <i>HEBP1</i>     | -5.390 | 106 | 56  | 4.86E-05 |
| cg20164720 | <i>AGTRAP</i>    | -5.287 | 49  | 113 | 4.86E-05 |
| cg26146086 | <i>RPS12</i>     | -4.861 | 65  | 97  | 4.86E-05 |
| cg01856985 | <i>ZNF384</i>    | -4.819 | 44  | 118 | 4.87E-05 |

|            |          |        |     |     |          |
|------------|----------|--------|-----|-----|----------|
| cg08560942 | ACHE     | -5.079 | 52  | 110 | 4.88E-05 |
| cg00960702 | CCDC9    | -4.732 | 36  | 126 | 4.89E-05 |
| cg19352977 | AZIN1    | -4.902 | 40  | 122 | 4.89E-05 |
| cg24499839 | DISC1    | -4.786 | 64  | 98  | 4.89E-05 |
| cg04710918 | GSS      | -4.220 | 87  | 75  | 4.89E-05 |
| cg12979743 | NDUFB5   | -4.375 | 53  | 109 | 4.89E-05 |
| cg13824734 | PSMB3    | -5.122 | 84  | 78  | 4.90E-05 |
| cg00736326 | ARPC1A   | -4.912 | 78  | 84  | 4.90E-05 |
| cg24580001 | FLJ37970 | 2.210  | 88  | 74  | 4.90E-05 |
| cg05780616 | SNRPF    | -4.852 | 87  | 75  | 4.90E-05 |
| cg08426384 | ADCK1    | -3.917 | 68  | 94  | 4.90E-05 |
| cg13552650 | MORC3    | -2.481 | 72  | 90  | 4.90E-05 |
| cg06049972 | UQCRC1   | -3.800 | 80  | 82  | 4.90E-05 |
| cg10958402 | RNF7     | -5.018 | 80  | 82  | 4.90E-05 |
| cg11901954 | C1orf73  | -4.133 | 80  | 82  | 4.90E-05 |
| cg18557086 | MNT      | -4.193 | 108 | 54  | 4.90E-05 |
| cg14161426 | ARTS-1   | -5.369 | 51  | 111 | 4.91E-05 |
| cg22781236 | UBL3     | -5.427 | 57  | 105 | 4.92E-05 |
| cg06720424 | RAP80    | -6.368 | 81  | 81  | 4.92E-05 |
| cg25499017 | CIT      | -5.893 | 47  | 115 | 4.92E-05 |
| cg04461705 | PFN4     | -3.122 | 72  | 90  | 4.93E-05 |
| cg26284390 | NFKBIZ   | -2.605 | 79  | 83  | 4.93E-05 |
| cg10497569 | RAB23    | -5.083 | 65  | 97  | 4.93E-05 |
| cg09712606 | IRF3     | -5.014 | 86  | 76  | 4.95E-05 |
| cg21029904 | ZNF91    | -4.653 | 45  | 117 | 4.96E-05 |
| cg10982775 | PLEKHA8  | -5.078 | 54  | 108 | 4.98E-05 |
| cg21728447 | ALDH4A1  | -4.882 | 106 | 56  | 4.99E-05 |
| cg03905094 | DEPDC1B  | -4.574 | 58  | 104 | 4.99E-05 |
| cg13488557 | C1orf63  | -3.583 | 56  | 105 | 4.99E-05 |
| cg01780482 | EPAS1    | -5.544 | 59  | 103 | 5.00E-05 |
| cg15605888 | FLJ32745 | -4.417 | 19  | 143 | 5.01E-05 |
| cg25853833 | C2orf29  | -4.870 | 73  | 89  | 5.01E-05 |
| cg27331144 | RING1    | -5.686 | 79  | 83  | 5.01E-05 |
| cg13199822 | ATP6V1A  | -5.078 | 67  | 95  | 5.03E-05 |
| cg10475433 | FLJ11171 | -4.291 | 102 | 60  | 5.03E-05 |
| cg27367952 | MGC50811 | -2.562 | 86  | 76  | 5.04E-05 |
| cg15669273 | FARS2    | -5.130 | 94  | 68  | 5.06E-05 |
| cg00155167 | VPS13B   | -4.713 | 39  | 123 | 5.07E-05 |
| cg24692716 | C6orf192 | -5.507 | 104 | 58  | 5.07E-05 |
| cg27662379 | RPN1     | -6.068 | 74  | 88  | 5.08E-05 |
| cg00368415 | SNX27    | -5.516 | 91  | 71  | 5.08E-05 |
| cg03956267 | FLJ20297 | -5.388 | 108 | 54  | 5.08E-05 |
| cg05038053 | ACP2     | -5.838 | 83  | 79  | 5.08E-05 |
| cg03856786 | ZNF497   | -4.885 | 42  | 120 | 5.10E-05 |
| cg27088877 | MON1A    | -6.715 | 72  | 90  | 5.12E-05 |
| cg18809151 | NDUFAF1  | -5.122 | 97  | 65  | 5.12E-05 |
| cg14430111 | TM7SF2   | -5.237 | 42  | 120 | 5.13E-05 |
| cg11175310 | RSU1     | -4.428 | 105 | 57  | 5.13E-05 |
| cg00210842 | APAF1    | -3.132 | 32  | 130 | 5.14E-05 |
| cg11638200 | PRKCQ    | -5.454 | 104 | 58  | 5.16E-05 |
| cg09002165 | SLC25A29 | -5.289 | 72  | 90  | 5.17E-05 |
| cg20497627 | MTIF2    | -5.905 | 50  | 112 | 5.17E-05 |
| cg06433995 | NOL7     | -5.267 | 67  | 95  | 5.18E-05 |
| cg06284244 | YES1     | -4.371 | 41  | 121 | 5.18E-05 |
| cg14962548 | TXNDC9   | -5.426 | 105 | 57  | 5.19E-05 |

|            |                  |        |     |     |          |
|------------|------------------|--------|-----|-----|----------|
| cg21020082 | <i>C2orf24</i>   | -4.402 | 51  | 111 | 5.20E-05 |
| cg06905862 | <i>TPP1</i>      | -4.732 | 60  | 102 | 5.20E-05 |
| cg17897879 | <i>TNFRSF8</i>   | -4.248 | 91  | 71  | 5.20E-05 |
| cg15318532 | <i>RFXAP</i>     | -6.237 | 80  | 82  | 5.21E-05 |
| cg13619768 | <i>PIAS4</i>     | -5.065 | 41  | 121 | 5.23E-05 |
| cg20791841 | <i>MAN2B1</i>    | -4.645 | 84  | 78  | 5.24E-05 |
| cg04794505 | <i>PBX3</i>      | -4.578 | 138 | 24  | 5.24E-05 |
| cg01204439 | <i>TPK1</i>      | -3.354 | 76  | 86  | 5.24E-05 |
| cg19149454 | <i>ADSL</i>      | -5.663 | 40  | 122 | 5.24E-05 |
| cg19434221 | <i>C20orf22</i>  | -4.580 | 104 | 58  | 5.24E-05 |
| cg01761409 | <i>RAB38</i>     | -5.017 | 72  | 90  | 5.26E-05 |
| cg16823105 | <i>KIAA1900</i>  | -4.149 | 82  | 80  | 5.26E-05 |
| cg01253107 | <i>STOML2</i>    | -4.899 | 84  | 78  | 5.26E-05 |
| cg18710985 | <i>C20orf23</i>  | -4.703 | 57  | 105 | 5.27E-05 |
| cg09263755 | <i>CCT6B</i>     | -4.675 | 92  | 70  | 5.28E-05 |
| cg26986815 | <i>CASP8</i>     | 2.299  | 91  | 71  | 5.28E-05 |
| cg12424907 | <i>TAS2R49</i>   | 3.944  | 50  | 112 | 5.29E-05 |
| cg06815666 | <i>PRPF31</i>    | -3.816 | 111 | 51  | 5.29E-05 |
| cg00782174 | <i>SLC1A5</i>    | -3.851 | 38  | 124 | 5.30E-05 |
| cg25467603 | <i>WDR18</i>     | -6.034 | 50  | 112 | 5.30E-05 |
| cg00916199 | <i>PRO1580</i>   | -5.561 | 100 | 62  | 5.30E-05 |
| cg07081888 | <i>NALP4</i>     | 3.120  | 98  | 64  | 5.30E-05 |
| cg08027745 | <i>SFRS3</i>     | -5.140 | 87  | 75  | 5.30E-05 |
| cg20377673 | <i>MIF</i>       | -5.817 | 50  | 112 | 5.30E-05 |
| cg22470827 | <i>CHMP2B</i>    | -5.336 | 76  | 86  | 5.30E-05 |
| cg26974738 | <i>CUTA</i>      | -4.395 | 58  | 104 | 5.30E-05 |
| cg04785461 | <i>DCLRE1C</i>   | -5.284 | 74  | 88  | 5.31E-05 |
| cg05745457 | <i>TKTL2</i>     | 2.287  | 96  | 66  | 5.31E-05 |
| cg09400966 | <i>PROS1</i>     | -5.897 | 82  | 80  | 5.31E-05 |
| cg27462160 | <i>MGC26885</i>  | -3.238 | 34  | 128 | 5.31E-05 |
| cg09712527 | <i>KBTBD7</i>    | -5.957 | 44  | 118 | 5.32E-05 |
| cg19891733 | <i>GABPA</i>     | -4.875 | 86  | 76  | 5.33E-05 |
| cg26979012 | <i>PSMC6</i>     | -5.738 | 56  | 106 | 5.33E-05 |
| cg05903609 | <i>PRPF8</i>     | -3.730 | 87  | 75  | 5.34E-05 |
| cg26174387 | <i>TMEM30A</i>   | -4.221 | 85  | 77  | 5.34E-05 |
| cg02200132 | <i>EIF4A2</i>    | -5.206 | 120 | 42  | 5.35E-05 |
| cg08380539 | <i>CTBS</i>      | -4.793 | 72  | 90  | 5.35E-05 |
| cg08020051 | <i>GPAA1</i>     | -4.246 | 61  | 101 | 5.36E-05 |
| cg01173291 | <i>ZSCAN2</i>    | -5.351 | 60  | 102 | 5.38E-05 |
| cg06665941 | <i>IFNAR2</i>    | -5.326 | 88  | 74  | 5.38E-05 |
| cg13704548 | <i>NOPE</i>      | -3.269 | 110 | 52  | 5.38E-05 |
| cg04228628 | <i>TNKS</i>      | -5.563 | 72  | 90  | 5.40E-05 |
| cg18338311 | <i>LOC124842</i> | -3.191 | 98  | 64  | 5.40E-05 |
| cg15397506 | <i>LOC93622</i>  | -5.850 | 85  | 77  | 5.41E-05 |
| cg20447773 | <i>FLJ23342</i>  | -5.436 | 52  | 110 | 5.41E-05 |
| cg26457013 | <i>TMEM86B</i>   | 2.105  | 79  | 83  | 5.41E-05 |
| cg03856450 | <i>SFXN5</i>     | -5.024 | 81  | 81  | 5.42E-05 |
| cg08570275 | <i>P2RY1</i>     | -4.689 | 74  | 88  | 5.42E-05 |
| cg26071978 | <i>HMFN0839</i>  | -5.669 | 51  | 111 | 5.42E-05 |
| cg01723464 | <i>MRFAP1</i>    | -5.119 | 60  | 102 | 5.43E-05 |
| cg00149659 | <i>C3orf10</i>   | -5.162 | 72  | 90  | 5.44E-05 |
| cg08097882 | <i>POU4F1</i>    | -4.095 | 104 | 58  | 5.48E-05 |
| cg04856689 | <i>CRHR1</i>     | -4.302 | 111 | 51  | 5.48E-05 |
| cg10211788 | <i>BRD2</i>      | -6.121 | 78  | 84  | 5.48E-05 |
| cg00685836 | <i>PPFIA2</i>    | -4.442 | 72  | 90  | 5.49E-05 |

|            |                  |        |     |     |          |
|------------|------------------|--------|-----|-----|----------|
| cg13420923 | <i>NHLRC2</i>    | -5.378 | 82  | 80  | 5.49E-05 |
| cg23426587 | <i>KLHL9</i>     | -4.851 | 100 | 62  | 5.49E-05 |
| cg11757293 | <i>KIFC2</i>     | -2.221 | 97  | 65  | 5.50E-05 |
| cg25484373 | <i>CCT5</i>      | -4.911 | 70  | 92  | 5.53E-05 |
| cg16884569 | <i>RASSF2</i>    | -4.974 | 87  | 75  | 5.53E-05 |
| cg18841894 | <i>SOD1</i>      | -4.846 | 44  | 118 | 5.53E-05 |
| cg14797438 | <i>PPP4R1</i>    | -4.045 | 66  | 96  | 5.54E-05 |
| cg26449836 | <i>SSBP1</i>     | -5.285 | 110 | 52  | 5.54E-05 |
| cg00131121 | <i>POLR2J</i>    | -4.399 | 62  | 100 | 5.54E-05 |
| cg12373072 | <i>OSBPL11</i>   | -3.508 | 75  | 87  | 5.54E-05 |
| cg17477756 | <i>HNRPM</i>     | -3.842 | 86  | 76  | 5.54E-05 |
| cg25694542 | <i>ZFYVE1</i>    | -4.825 | 61  | 101 | 5.54E-05 |
| cg01532103 | <i>BSG</i>       | -4.334 | 75  | 87  | 5.54E-05 |
| cg01442481 | <i>RALY</i>      | -4.332 | 121 | 41  | 5.56E-05 |
| cg24241455 | <i>KLHL20</i>    | -4.849 | 94  | 68  | 5.56E-05 |
| cg20688340 | <i>MMP21</i>     | 2.947  | 64  | 98  | 5.56E-05 |
| cg06386533 | <i>SOCS5</i>     | -5.986 | 65  | 97  | 5.56E-05 |
| cg26805528 | <i>CRAT</i>      | -1.671 | 75  | 87  | 5.56E-05 |
| cg14066280 | <i>ZNF613</i>    | -5.111 | 39  | 123 | 5.57E-05 |
| cg01308501 | <i>IL12A</i>     | -6.004 | 46  | 116 | 5.57E-05 |
| cg02620470 | <i>EXT2</i>      | -5.098 | 41  | 121 | 5.58E-05 |
| cg22019980 | <i>RNF146</i>    | -4.378 | 30  | 132 | 5.58E-05 |
| cg17589175 | <i>HSPC152</i>   | -5.036 | 51  | 111 | 5.59E-05 |
| cg03359508 | <i>ANXA11</i>    | -4.766 | 101 | 61  | 5.61E-05 |
| cg27420236 | <i>RPRM</i>      | -3.607 | 82  | 80  | 5.62E-05 |
| cg12188482 | <i>CYB5D2</i>    | -5.396 | 35  | 127 | 5.62E-05 |
| cg22090592 | <i>C14orf173</i> | 0.626  | 51  | 111 | 5.63E-05 |
| cg26152597 | <i>ZBTB20</i>    | -5.613 | 69  | 93  | 5.63E-05 |
| cg26990660 | <i>RAMP2</i>     | -4.433 | 75  | 87  | 5.64E-05 |
| cg27662877 | <i>CYB5A</i>     | -4.861 | 41  | 121 | 5.64E-05 |
| cg21625881 | <i>GNAS</i>      | 0.937  | 98  | 64  | 5.65E-05 |
| cg05475277 | <i>FLJ23322</i>  | 4.624  | 53  | 109 | 5.65E-05 |
| cg09659887 | <i>IPO7</i>      | -4.678 | 68  | 94  | 5.65E-05 |
| cg07212894 | <i>SLC38A3</i>   | -4.621 | 105 | 57  | 5.65E-05 |
| cg05568762 | <i>MLR1</i>      | -5.231 | 84  | 78  | 5.66E-05 |
| cg06212607 | <i>GGPS1</i>     | -5.172 | 104 | 58  | 5.66E-05 |
| cg14456683 | <i>ZIC1</i>      | -1.485 | 86  | 76  | 5.66E-05 |
| cg12858075 | <i>E2F6</i>      | -4.771 | 76  | 86  | 5.66E-05 |
| cg26716323 | <i>TOMM7</i>     | -5.109 | 54  | 108 | 5.67E-05 |
| cg20097268 | <i>HBXIP</i>     | -4.789 | 81  | 81  | 5.67E-05 |
| cg06044117 | <i>CEP57</i>     | -5.906 | 47  | 115 | 5.68E-05 |
| cg02240226 | <i>GLB1L</i>     | -5.824 | 60  | 102 | 5.68E-05 |
| cg04833152 | <i>PURG</i>      | -4.464 | 81  | 81  | 5.69E-05 |
| cg27143938 | <i>ZNF211</i>    | -4.603 | 72  | 90  | 5.70E-05 |
| cg07455975 | <i>PTD004</i>    | -3.391 | 41  | 121 | 5.70E-05 |
| cg15846641 | <i>HTLF</i>      | -5.219 | 63  | 99  | 5.72E-05 |
| cg22409383 | <i>MATR3</i>     | -5.490 | 40  | 122 | 5.72E-05 |
| cg23261102 | <i>DNAJC18</i>   | -4.293 | 57  | 105 | 5.73E-05 |
| cg10833014 | <i>HSP90AA1</i>  | -5.280 | 114 | 48  | 5.74E-05 |
| cg19208897 | <i>TACC3</i>     | -3.814 | 98  | 64  | 5.74E-05 |
| cg25683012 | <i>BAZ2A</i>     | -5.326 | 37  | 125 | 5.75E-05 |
| cg12352006 | <i>ZMAT5</i>     | -5.169 | 87  | 75  | 5.75E-05 |
| cg16256504 | <i>WNT6</i>      | -3.872 | 99  | 63  | 5.75E-05 |
| cg17731261 | <i>ACHE</i>      | -5.636 | 89  | 73  | 5.75E-05 |
| cg10353436 | <i>EIF4A1</i>    | -4.975 | 100 | 62  | 5.75E-05 |

|            |                  |        |     |     |          |
|------------|------------------|--------|-----|-----|----------|
| cg08934443 | <i>HIST2H2AB</i> | -3.600 | 104 | 58  | 5.76E-05 |
| cg01355520 | <i>HADHA</i>     | -4.117 | 93  | 69  | 5.76E-05 |
| cg25149927 | <i>SSH1</i>      | -3.976 | 69  | 93  | 5.77E-05 |
| cg06071083 | <i>SLC12A4</i>   | -6.196 | 88  | 74  | 5.77E-05 |
| cg24980458 | <i>FOXP1</i>     | -4.858 | 71  | 91  | 5.78E-05 |
| cg01876612 | <i>ZDHHC7</i>    | -5.476 | 95  | 67  | 5.79E-05 |
| cg26125443 | <i>POLR2G</i>    | -5.103 | 97  | 65  | 5.79E-05 |
| cg05421688 | <i>C1orf76</i>   | -4.001 | 95  | 67  | 5.80E-05 |
| cg19157971 | <i>RABIF</i>     | -5.511 | 60  | 102 | 5.80E-05 |
| cg19935424 | <i>MXRA7</i>     | -4.300 | 118 | 44  | 5.80E-05 |
| cg23032316 | <i>AAAS</i>      | -3.011 | 72  | 82  | 5.80E-05 |
| cg07685221 | <i>QTRT1</i>     | -4.526 | 92  | 70  | 5.80E-05 |
| cg20143092 | <i>CD44</i>      | -2.699 | 49  | 113 | 5.81E-05 |
| cg20131685 | <i>LLGL1</i>     | -4.927 | 113 | 49  | 5.83E-05 |
| cg00499599 | <i>MCM3AP</i>    | -5.518 | 97  | 65  | 5.83E-05 |
| cg23948874 | <i>EIF4G2</i>    | -5.681 | 86  | 76  | 5.84E-05 |
| cg11754676 | <i>ZNF10</i>     | -5.448 | 79  | 83  | 5.85E-05 |
| cg03560597 | <i>DUSP18</i>    | -5.170 | 45  | 117 | 5.86E-05 |
| cg18587018 | <i>CRSP9</i>     | -5.063 | 45  | 117 | 5.87E-05 |
| cg20162159 | <i>MON1A</i>     | -5.298 | 51  | 111 | 5.87E-05 |
| cg07494248 | <i>HSPD1</i>     | -4.680 | 94  | 68  | 5.88E-05 |
| cg16408394 | <i>RXRA</i>      | -4.953 | 91  | 71  | 5.88E-05 |
| cg23446109 | <i>PCCA</i>      | -4.094 | 44  | 118 | 5.88E-05 |
| cg05969697 | <i>BICD2</i>     | -5.055 | 97  | 65  | 5.88E-05 |
| cg16668394 | <i>MEN1</i>      | -4.199 | 106 | 56  | 5.88E-05 |
| cg25923856 | <i>TMEM14A</i>   | -4.365 | 71  | 91  | 5.89E-05 |
| cg27298878 | <i>C1orf89</i>   | -2.618 | 84  | 78  | 5.90E-05 |
| cg07533529 | <i>EML3</i>      | -3.369 | 58  | 104 | 5.90E-05 |
| cg18042079 | <i>C17orf40</i>  | -4.159 | 102 | 60  | 5.90E-05 |
| cg00824109 | <i>CHD4</i>      | -5.106 | 55  | 107 | 5.91E-05 |
| cg04217178 | <i>ITM2B</i>     | -5.339 | 43  | 119 | 5.91E-05 |
| cg20896197 | <i>MPHOSPH1</i>  | -5.198 | 79  | 83  | 5.91E-05 |
| cg08803129 | <i>SLC39A6</i>   | -5.798 | 41  | 121 | 5.91E-05 |
| cg26717786 | <i>FLJ44861</i>  | -3.801 | 85  | 77  | 5.91E-05 |
| cg09553358 | <i>BM88</i>      | -3.973 | 100 | 62  | 5.92E-05 |
| cg04380513 | <i>ST8SIA4</i>   | -5.287 | 115 | 47  | 5.92E-05 |
| cg10491648 | <i>WDR54</i>     | -4.227 | 70  | 92  | 5.92E-05 |
| cg13576061 | <i>IL6ST</i>     | -4.704 | 54  | 108 | 5.95E-05 |
| cg20948472 | <i>ZMAT2</i>     | -3.484 | 94  | 68  | 5.96E-05 |
| cg27310686 | <i>C6orf72</i>   | -4.846 | 70  | 92  | 5.96E-05 |
| cg05657090 | <i>RNASEH2A</i>  | 3.263  | 49  | 113 | 5.98E-05 |
| cg08709385 |                  | 3.588  | 77  | 85  | 5.98E-05 |
| cg19764399 | <i>MED4</i>      | -5.090 | 38  | 124 | 5.98E-05 |
| cg20016874 | <i>C14orf32</i>  | -5.449 | 41  | 121 | 5.98E-05 |
| cg23089438 | <i>CSF1</i>      | -3.313 | 65  | 97  | 6.00E-05 |
| cg15206330 | <i>WDR79</i>     | -5.933 | 68  | 94  | 6.01E-05 |
| cg04047710 | <i>C21orf66</i>  | -4.701 | 66  | 96  | 6.01E-05 |
| cg02668581 | <i>DSU</i>       | -5.468 | 104 | 58  | 6.01E-05 |
| cg00256281 | <i>PMM1</i>      | -5.339 | 93  | 69  | 6.03E-05 |
| cg05064352 | <i>PHF21B</i>    | -3.709 | 67  | 95  | 6.03E-05 |
| cg07782113 | <i>HIVEP1</i>    | -5.545 | 62  | 100 | 6.03E-05 |
| cg10150530 | <i>LRMP</i>      | -3.226 | 96  | 66  | 6.04E-05 |
| cg06979034 | <i>ARHGEF5</i>   | -3.649 | 78  | 84  | 6.04E-05 |
| cg09757277 | <i>ZNF222</i>    | -3.402 | 71  | 90  | 6.04E-05 |
| cg17420360 | <i>FLJ13236</i>  | -4.519 | 66  | 96  | 6.04E-05 |

|            |               |        |     |     |          |
|------------|---------------|--------|-----|-----|----------|
| cg02421543 | DR1           | -3.178 | 98  | 64  | 6.04E-05 |
| cg05937182 | ST7           | -5.128 | 77  | 85  | 6.05E-05 |
| cg05715287 | CDC40         | -4.109 | 64  | 98  | 6.05E-05 |
| cg08015253 | MOCOS         | -4.523 | 52  | 110 | 6.05E-05 |
| cg03554914 | MASTL         | -4.919 | 87  | 75  | 6.06E-05 |
| cg14275779 | PLEKHH3       | -4.908 | 85  | 77  | 6.07E-05 |
| cg26123414 | ORAOV1        | -5.125 | 72  | 90  | 6.07E-05 |
| cg27555479 | DYNLRB2       | -2.794 | 74  | 88  | 6.07E-05 |
| cg22182975 | GPR31         | 2.916  | 78  | 84  | 6.07E-05 |
| cg11820734 | MRPL35        | -4.940 | 60  | 102 | 6.09E-05 |
| cg17356181 | MAP4K5        | -5.083 | 101 | 61  | 6.09E-05 |
| cg18187335 | CTTN          | -3.862 | 65  | 97  | 6.09E-05 |
| cg01334437 | LYPLA1        | -4.749 | 35  | 127 | 6.09E-05 |
| cg24205633 | ACN9          | -6.088 | 88  | 74  | 6.09E-05 |
| cg19736898 | C1orf77       | -4.987 | 76  | 86  | 6.11E-05 |
| cg24337809 | BTG2          | -5.453 | 50  | 112 | 6.11E-05 |
| cg09541468 | CORO1B        | -5.677 | 44  | 118 | 6.14E-05 |
| cg20811273 | FLJ33167      | -4.721 | 102 | 60  | 6.15E-05 |
| cg16062480 | EPRS          | -5.578 | 66  | 96  | 6.16E-05 |
| cg16695354 | LYSMD2        | -4.429 | 49  | 113 | 6.16E-05 |
| cg16538604 | WHSC2         | -5.619 | 30  | 132 | 6.17E-05 |
| cg15394409 | TMEM111       | -5.597 | 69  | 93  | 6.18E-05 |
| cg07070694 | ZFYVE1        | -3.168 | 80  | 82  | 6.19E-05 |
| cg05337966 | C13orf1       | -6.143 | 55  | 107 | 6.20E-05 |
| cg14309281 | MAP3K3        | -6.559 | 64  | 98  | 6.20E-05 |
| cg17345480 | SPPL3         | -4.267 | 49  | 113 | 6.21E-05 |
| cg26620157 | PAX9          | -2.172 | 103 | 59  | 6.22E-05 |
| cg11706746 | B3GAT3        | -5.712 | 89  | 73  | 6.22E-05 |
| cg01813334 | EIF3S9        | -4.162 | 59  | 103 | 6.23E-05 |
| cg06277481 | ANKRD47       | -4.983 | 92  | 70  | 6.23E-05 |
| cg17031727 | COG2          | -2.477 | 86  | 76  | 6.23E-05 |
| cg17469356 | TUSC2         | -4.923 | 86  | 76  | 6.23E-05 |
| cg19139277 | ZNF395        | -5.723 | 86  | 76  | 6.24E-05 |
| cg06333435 | POLR3D        | -6.399 | 78  | 84  | 6.26E-05 |
| cg10488185 | MLL5          | -4.280 | 87  | 75  | 6.27E-05 |
| cg13086586 | PPAT          | -0.772 | 58  | 104 | 6.27E-05 |
| cg16616325 | TSNAX         | -5.425 | 54  | 108 | 6.27E-05 |
| cg13743031 | NEIL3         | -4.491 | 91  | 71  | 6.27E-05 |
| cg00502442 | ZDHHC14       | -5.013 | 37  | 125 | 6.28E-05 |
| cg08198370 | MRPS15        | -5.216 | 98  | 64  | 6.28E-05 |
| cg09070492 | COX15         | -4.751 | 64  | 98  | 6.28E-05 |
| cg15185804 | PGM3          | -3.748 | 62  | 100 | 6.28E-05 |
| cg19452316 | RASSF5        | -4.848 | 56  | 106 | 6.28E-05 |
| cg10885645 | CLSTN3        | -4.742 | 98  | 64  | 6.29E-05 |
| cg03887534 | BCL2L13       | -4.617 | 101 | 61  | 6.29E-05 |
| cg06655504 | GDPD1         | -4.403 | 55  | 107 | 6.29E-05 |
| cg25261908 | TRPM4         | -3.994 | 82  | 80  | 6.29E-05 |
| cg00522034 | CBLB          | -6.599 | 55  | 107 | 6.29E-05 |
| cg02608019 | SYK           | -4.208 | 97  | 65  | 6.29E-05 |
| cg18986332 | CLASP2        | -6.299 | 67  | 95  | 6.29E-05 |
| cg13289561 | AKFZP586D0919 | -4.769 | 73  | 89  | 6.30E-05 |
| cg25937494 | SREBF2        | -6.206 | 39  | 123 | 6.30E-05 |
| cg15175266 | CDH12         | 0.960  | 80  | 82  | 6.32E-05 |
| cg01519742 | JAKMIP1       | -4.894 | 104 | 58  | 6.35E-05 |
| cg00520708 | FLJ37562      | -2.386 | 62  | 98  | 6.35E-05 |

|            |                  |        |     |     |          |
|------------|------------------|--------|-----|-----|----------|
| cg23325932 | <i>EXOSC5</i>    | -3.270 | 95  | 66  | 6.36E-05 |
| cg11356705 | <i>NUP54</i>     | -5.664 | 46  | 116 | 6.37E-05 |
| cg15556558 | <i>STRN</i>      | -5.400 | 60  | 102 | 6.37E-05 |
| cg24459023 | <i>CRSP7</i>     | -4.881 | 90  | 72  | 6.37E-05 |
| cg08707078 | <i>MGC72075</i>  | -4.100 | 80  | 82  | 6.37E-05 |
| cg13448401 | <i>VPS35</i>     | -6.446 | 62  | 100 | 6.37E-05 |
| cg12497851 | <i>TBC1D14</i>   | -4.064 | 80  | 82  | 6.37E-05 |
| cg18264687 | <i>MLLT3</i>     | -3.587 | 43  | 119 | 6.37E-05 |
| cg25563456 | <i>WT1</i>       | -4.012 | 77  | 85  | 6.38E-05 |
| cg27100123 | <i>SERPINB8</i>  | 2.054  | 76  | 86  | 6.38E-05 |
| cg00862770 | <i>FKBP5</i>     | -5.539 | 94  | 68  | 6.39E-05 |
| cg09747829 | <i>BAI3</i>      | -3.290 | 49  | 113 | 6.39E-05 |
| cg21572997 | <i>LRP5</i>      | -5.487 | 55  | 107 | 6.39E-05 |
| cg04148458 | <i>FAIM</i>      | -5.078 | 79  | 83  | 6.39E-05 |
| cg16793150 | <i>MRPS27</i>    | -5.525 | 32  | 130 | 6.41E-05 |
| cg18307767 | <i>CCDC5</i>     | -4.988 | 61  | 101 | 6.41E-05 |
| cg23508786 | <i>IFNGR2</i>    | -3.087 | 78  | 84  | 6.41E-05 |
| cg23943360 | <i>LDLR</i>      | -4.725 | 32  | 130 | 6.42E-05 |
| cg03369671 | <i>ARMC9</i>     | -5.503 | 57  | 105 | 6.42E-05 |
| cg03543403 | <i>DIABLO</i>    | -5.314 | 64  | 98  | 6.42E-05 |
| cg09223071 | <i>SUPT7L</i>    | -5.272 | 53  | 109 | 6.42E-05 |
| cg05840553 | <i>LRSAM1</i>    | -4.693 | 50  | 112 | 6.43E-05 |
| cg01725199 | <i>GALNT12</i>   | -5.255 | 48  | 114 | 6.44E-05 |
| cg03805364 | <i>PAFAH1B2</i>  | -5.188 | 106 | 56  | 6.44E-05 |
| cg10387901 | <i>MRPS25</i>    | -4.395 | 87  | 75  | 6.44E-05 |
| cg00495415 | <i>SP1</i>       | -4.830 | 93  | 69  | 6.45E-05 |
| cg07218192 | <i>MPP5</i>      | -4.867 | 95  | 67  | 6.45E-05 |
| cg20537325 | <i>MGMT</i>      | 2.912  | 122 | 40  | 6.45E-05 |
| cg20925482 | <i>C20orf111</i> | -5.183 | 70  | 92  | 6.45E-05 |
| cg25803423 | <i>C14orf119</i> | -4.219 | 92  | 70  | 6.45E-05 |
| cg24682149 | <i>LSM12</i>     | -4.667 | 90  | 72  | 6.46E-05 |
| cg13996731 | <i>NR3C2</i>     | -4.403 | 81  | 81  | 6.46E-05 |
| cg21842478 | <i>HOXB13</i>    | -4.735 | 69  | 93  | 6.49E-05 |
| cg27043630 | <i>MYD88</i>     | -4.634 | 73  | 89  | 6.49E-05 |
| cg13991233 | <i>GAS7</i>      | -3.672 | 117 | 45  | 6.51E-05 |
| cg10299667 | <i>SLC25A10</i>  | -5.608 | 63  | 99  | 6.52E-05 |
| cg13878093 | <i>TBPL1</i>     | -5.829 | 88  | 74  | 6.53E-05 |
| cg22577136 | <i>IKBKE</i>     | -4.885 | 54  | 108 | 6.53E-05 |
| cg05522288 | <i>LSM8</i>      | -4.739 | 56  | 106 | 6.54E-05 |
| cg12691366 | <i>HSPC159</i>   | -6.631 | 57  | 105 | 6.58E-05 |
| cg00381076 | <i>C18orf54</i>  | -4.321 | 76  | 86  | 6.59E-05 |
| cg01033160 | <i>CEBPG</i>     | -4.601 | 67  | 95  | 6.60E-05 |
| cg04011872 | <i>MRPL23</i>    | -5.154 | 74  | 88  | 6.60E-05 |
| cg04303269 | <i>CEP57</i>     | -4.492 | 29  | 133 | 6.60E-05 |
| cg04480914 | <i>PPP2R5B</i>   | -6.196 | 46  | 116 | 6.60E-05 |
| cg04912278 | <i>MRPL4</i>     | -5.405 | 105 | 57  | 6.60E-05 |
| cg05672265 | <i>SLC20A1</i>   | -4.923 | 82  | 80  | 6.60E-05 |
| cg08304608 | <i>TUBB1</i>     | 2.981  | 102 | 60  | 6.60E-05 |
| cg08552121 | <i>TMEM14B</i>   | -4.478 | 89  | 73  | 6.60E-05 |
| cg09003876 | <i>C18orf21</i>  | -5.990 | 101 | 61  | 6.60E-05 |
| cg09433780 | <i>APPL</i>      | -3.452 | 66  | 96  | 6.60E-05 |
| cg10218959 | <i>PTGES2</i>    | -4.378 | 81  | 81  | 6.60E-05 |
| cg13724813 | <i>SPSB1</i>     | -4.883 | 90  | 72  | 6.60E-05 |
| cg23326197 | <i>CYP3A4</i>    | 0.816  | 79  | 83  | 6.60E-05 |
| cg27339143 | <i>PSRC1</i>     | -4.416 | 105 | 57  | 6.60E-05 |

|            |                 |        |     |     |          |
|------------|-----------------|--------|-----|-----|----------|
| cg17892328 | <i>GLUL</i>     | -5.101 | 96  | 66  | 6.61E-05 |
| cg12411068 | <i>SMARCA4</i>  | -5.587 | 94  | 68  | 6.63E-05 |
| cg22880820 | <i>C9orf100</i> | -3.518 | 73  | 89  | 6.64E-05 |
| cg11324740 | <i>OIP5</i>     | -4.563 | 94  | 68  | 6.67E-05 |
| cg18197998 | <i>CRAT</i>     | -4.123 | 56  | 106 | 6.67E-05 |
| cg09245378 | <i>KIAA0157</i> | -5.401 | 73  | 89  | 6.67E-05 |
| cg26158980 | <i>CHRNA10</i>  | 3.188  | 70  | 92  | 6.69E-05 |
| cg06529761 | <i>DNASE1</i>   | 1.777  | 91  | 71  | 6.70E-05 |
| cg13240639 | <i>ZMAT5</i>    | -4.542 | 98  | 64  | 6.70E-05 |
| cg22837289 | <i>MDS028</i>   | -4.564 | 66  | 96  | 6.70E-05 |
| cg16648297 | <i>ZNF576</i>   | -6.192 | 49  | 113 | 6.71E-05 |
| cg16235860 | <i>USP1</i>     | -5.558 | 41  | 121 | 6.71E-05 |
| cg09831311 | <i>COX4NB</i>   | -4.829 | 69  | 93  | 6.73E-05 |
| cg11797883 | <i>ARPC5L</i>   | -5.792 | 102 | 60  | 6.75E-05 |
| cg02017041 | <i>SCN1B</i>    | -3.143 | 95  | 67  | 6.75E-05 |
| cg20603424 | <i>DDX31</i>    | -6.156 | 77  | 85  | 6.77E-05 |
| cg22833292 | <i>RPS6KA4</i>  | -4.023 | 84  | 78  | 6.77E-05 |
| cg06628693 | <i>PRKACB</i>   | -4.109 | 113 | 49  | 6.77E-05 |
| cg07295092 | <i>FPGS</i>     | -4.971 | 51  | 111 | 6.77E-05 |
| cg21539243 | <i>PHTF1</i>    | -4.718 | 44  | 118 | 6.77E-05 |
| cg20767936 | <i>ASNSD1</i>   | -4.327 | 71  | 91  | 6.78E-05 |
| cg12651014 | <i>CCDC7</i>    | -4.509 | 66  | 96  | 6.79E-05 |
| cg15609273 | <i>RCBTB1</i>   | -4.821 | 94  | 68  | 6.79E-05 |
| cg17640201 | <i>ZNF553</i>   | -5.301 | 106 | 56  | 6.79E-05 |
| cg20358834 | <i>LRFN4</i>    | -5.680 | 85  | 77  | 6.79E-05 |
| cg21209091 | <i>DKK4</i>     | -1.861 | 95  | 67  | 6.79E-05 |
| cg07453618 | <i>FAM79A</i>   | -6.149 | 48  | 114 | 6.82E-05 |
| cg22670349 | <i>FLJ40432</i> | -5.396 | 49  | 113 | 6.82E-05 |
| cg01677098 | <i>TCEA1</i>    | -5.668 | 35  | 127 | 6.83E-05 |
| cg23927367 | <i>ACAD8</i>    | -5.204 | 47  | 115 | 6.83E-05 |
| cg20779414 | <i>STAT6</i>    | -4.745 | 69  | 93  | 6.84E-05 |
| cg10215570 | <i>LOC84661</i> | -4.684 | 123 | 39  | 6.85E-05 |
| cg16275172 | <i>TMOD3</i>    | -5.787 | 65  | 97  | 6.85E-05 |
| cg21548414 | <i>CLIC5</i>    | -5.592 | 53  | 109 | 6.85E-05 |
| cg24356797 | <i>UBA52</i>    | -5.280 | 70  | 92  | 6.85E-05 |
| cg26553682 | <i>ZNF498</i>   | -4.999 | 73  | 89  | 6.85E-05 |
| cg14853515 | <i>LSM5</i>     | -6.176 | 65  | 97  | 6.85E-05 |
| cg23070585 | <i>RXRΒ</i>     | -6.281 | 48  | 114 | 6.85E-05 |
| cg00072216 | <i>MXD4</i>     | -5.455 | 48  | 114 | 6.86E-05 |
| cg03373857 | <i>WBSCR16</i>  | -4.731 | 95  | 67  | 6.86E-05 |
| cg25896975 | <i>SNX17</i>    | -5.406 | 100 | 62  | 6.86E-05 |
| cg00234961 | <i>ZBED4</i>    | -3.870 | 99  | 63  | 6.86E-05 |
| cg07936037 | <i>SSR1</i>     | -5.165 | 57  | 105 | 6.86E-05 |
| cg20887455 | <i>PHB</i>      | -4.853 | 59  | 103 | 6.86E-05 |
| cg24549085 | <i>RTKL1</i>    | -5.789 | 70  | 92  | 6.86E-05 |
| cg07478208 | <i>MEIS3</i>    | -2.369 | 115 | 47  | 6.86E-05 |
| cg12906740 | <i>NUDT15</i>   | -5.286 | 122 | 40  | 6.86E-05 |
| cg25752527 | <i>UBXD2</i>    | -5.003 | 64  | 98  | 6.86E-05 |
| cg27611665 | <i>FBXL12</i>   | -5.923 | 91  | 71  | 6.86E-05 |
| cg10347998 | <i>GSK3B</i>    | -5.558 | 82  | 80  | 6.87E-05 |
| cg21076470 | <i>MRPS14</i>   | -4.535 | 59  | 103 | 6.87E-05 |
| cg00265490 | <i>MTDH</i>     | -3.497 | 93  | 69  | 6.87E-05 |
| cg27287498 | <i>IBRDC3</i>   | -4.613 | 47  | 115 | 6.87E-05 |
| cg01090445 | <i>TRAP</i>     | -4.919 | 42  | 120 | 6.88E-05 |
| cg18178963 | <i>NDUFB6</i>   | -5.925 | 70  | 92  | 6.89E-05 |

|            |            |        |     |     |          |
|------------|------------|--------|-----|-----|----------|
| cg06465926 | PPP2R3A    | -3.718 | 83  | 79  | 6.89E-05 |
| cg20550520 | ARHGAP5    | -3.521 | 55  | 107 | 6.89E-05 |
| cg18585306 | TBC1D5     | -4.766 | 58  | 104 | 6.89E-05 |
| cg12803724 | C8orf70    | -5.245 | 43  | 119 | 6.90E-05 |
| cg11265916 | MAPK1      | -5.270 | 58  | 104 | 6.90E-05 |
| cg18119529 | ZNF114     | -4.522 | 47  | 115 | 6.94E-05 |
| cg19890858 | PP2447     | -4.636 | 79  | 83  | 6.94E-05 |
| cg24082826 | ITPR2      | -4.777 | 81  | 81  | 6.96E-05 |
| cg23576473 | SLC35B1    | -5.326 | 110 | 52  | 6.96E-05 |
| cg14424530 | SLC7A1     | -4.735 | 58  | 104 | 6.96E-05 |
| cg16909124 | NR2C1      | -5.875 | 89  | 73  | 6.96E-05 |
| cg22708853 | FLT3LG     | -4.361 | 104 | 58  | 6.96E-05 |
| cg04317543 | LMNA       | -5.336 | 49  | 113 | 6.96E-05 |
| cg09227136 | GOLGA1     | -5.797 | 44  | 118 | 6.96E-05 |
| cg03363175 | NLE1       | -5.337 | 67  | 95  | 6.97E-05 |
| cg11695601 | CHN1       | -4.198 | 53  | 109 | 7.00E-05 |
| cg09478597 | SPFH2      | -6.304 | 61  | 101 | 7.05E-05 |
| cg09793001 | TOP2B      | -4.869 | 65  | 97  | 7.05E-05 |
| cg10704923 | HIST1H1T   | 4.410  | 110 | 52  | 7.05E-05 |
| cg21772838 | CSTF1      | -6.329 | 79  | 83  | 7.05E-05 |
| cg23641267 | LPXN       | 1.343  | 121 | 41  | 7.05E-05 |
| cg27575501 | TREX1      | -4.996 | 71  | 91  | 7.06E-05 |
| cg26088104 | FLJ32363   | -4.451 | 47  | 115 | 7.09E-05 |
| cg16747567 | PCNX       | -4.196 | 97  | 65  | 7.10E-05 |
| cg25955899 | C13orf12   | -5.836 | 50  | 112 | 7.10E-05 |
| cg16007680 | GLI4       | -5.561 | 47  | 115 | 7.11E-05 |
| cg01866162 | CTCF       | -5.628 | 48  | 114 | 7.13E-05 |
| cg24813212 | TEKT2      | -5.010 | 51  | 111 | 7.14E-05 |
| cg02299279 | UBL7       | -6.540 | 70  | 92  | 7.15E-05 |
| cg18211447 | RAGE       | -4.615 | 88  | 74  | 7.19E-05 |
| cg26813458 | CEACAM6    | 2.251  | 76  | 86  | 7.19E-05 |
| cg06087537 | RNF38      | -5.136 | 123 | 39  | 7.20E-05 |
| cg06521852 | HRIHFB2122 | -2.578 | 115 | 47  | 7.20E-05 |
| cg19669439 | BTRC       | -4.977 | 45  | 117 | 7.20E-05 |
| cg27199523 | CCDC28A    | -6.367 | 96  | 66  | 7.22E-05 |
| cg06109724 | NUDT5      | -4.182 | 53  | 109 | 7.25E-05 |
| cg02917972 | ZCCHC11    | -4.596 | 53  | 109 | 7.25E-05 |
| cg08284151 | DPPA3      | -0.537 | 132 | 30  | 7.26E-05 |
| cg14723799 | C14orf104  | -5.615 | 43  | 119 | 7.26E-05 |
| cg03276813 | SSFA2      | -6.235 | 112 | 50  | 7.28E-05 |
| cg08017606 | SH3RF2     | -3.583 | 54  | 108 | 7.29E-05 |
| cg08673615 | HMGCL      | -4.273 | 71  | 91  | 7.29E-05 |
| cg20284440 | FRMD6      | -5.236 | 79  | 83  | 7.29E-05 |
| cg21099326 | TRIM35     | -6.128 | 65  | 97  | 7.29E-05 |
| cg18676393 | GEMIN6     | -4.843 | 55  | 107 | 7.30E-05 |
| cg15884411 | TMEM127    | -5.196 | 94  | 68  | 7.30E-05 |
| cg17547537 | EIF1       | -4.885 | 51  | 111 | 7.30E-05 |
| cg05908775 | ZNF211     | -5.380 | 75  | 87  | 7.30E-05 |
| cg22603964 | MAN2A1     | -5.472 | 92  | 70  | 7.31E-05 |
| cg21922574 | NETO1      | -5.381 | 88  | 74  | 7.32E-05 |
| cg03065202 | MGC17330   | -4.817 | 96  | 66  | 7.32E-05 |
| cg25159610 | PLK2       | -5.083 | 85  | 77  | 7.32E-05 |
| cg01668465 | SCG2       | -3.127 | 77  | 84  | 7.33E-05 |
| cg09454892 | SAMD8      | -0.526 | 101 | 61  | 7.34E-05 |
| cg07799947 | NPAS2      | -1.374 | 116 | 46  | 7.34E-05 |

|            |                  |        |     |     |          |
|------------|------------------|--------|-----|-----|----------|
| cg08568512 | <i>FHOD3</i>     | -5.326 | 93  | 69  | 7.34E-05 |
| cg11979312 | <i>TNFSF10</i>   | 1.808  | 79  | 83  | 7.34E-05 |
| cg17505757 | <i>NUP88</i>     | -3.644 | 58  | 104 | 7.34E-05 |
| cg06349174 | <i>STIM1</i>     | -4.938 | 101 | 61  | 7.35E-05 |
| cg11334469 | <i>GTF2I</i>     | -4.465 | 115 | 47  | 7.35E-05 |
| cg08201421 | <i>TNNC2</i>     | 2.045  | 72  | 90  | 7.37E-05 |
| cg14145762 | <i>FLJ10726</i>  | -3.565 | 49  | 113 | 7.37E-05 |
| cg09138627 | <i>TNRC15</i>    | -5.302 | 31  | 131 | 7.39E-05 |
| cg21039631 | <i>CD58</i>      | -3.803 | 78  | 84  | 7.40E-05 |
| cg25059436 | <i>CUGBP1</i>    | -4.673 | 95  | 67  | 7.40E-05 |
| cg27291231 | <i>SSNA1</i>     | 1.982  | 85  | 77  | 7.40E-05 |
| cg14821083 | <i>SEPHS2</i>    | -4.607 | 104 | 58  | 7.40E-05 |
| cg15604008 | <i>FUSIP1</i>    | -4.781 | 81  | 81  | 7.40E-05 |
| cg25013852 | <i>PGM1</i>      | -4.949 | 59  | 103 | 7.40E-05 |
| cg02582608 | <i>ALCAM</i>     | -5.024 | 74  | 88  | 7.42E-05 |
| cg12646585 | <i>C8orf32</i>   | -4.196 | 51  | 111 | 7.42E-05 |
| cg01040062 | <i>CYB5D2</i>    | -4.521 | 69  | 93  | 7.42E-05 |
| cg26790132 | <i>IL17D</i>     | -4.486 | 97  | 65  | 7.42E-05 |
| cg20717059 | <i>C8orf13</i>   | -4.886 | 62  | 100 | 7.43E-05 |
| cg11206763 | <i>FAM62A</i>    | -5.061 | 72  | 90  | 7.44E-05 |
| cg18934187 | <i>STARD6</i>    | 1.578  | 101 | 61  | 7.44E-05 |
| cg04745698 | <i>UPF2</i>      | -5.586 | 39  | 123 | 7.44E-05 |
| cg16000888 | <i>C11orf35</i>  | -5.118 | 53  | 109 | 7.46E-05 |
| cg11672225 | <i>RNF185</i>    | -2.031 | 39  | 123 | 7.47E-05 |
| cg00293409 | <i>LRRC33</i>    | -3.966 | 50  | 112 | 7.48E-05 |
| cg11074746 | <i>C2orf4</i>    | -5.516 | 66  | 96  | 7.49E-05 |
| cg04849025 | <i>YIPF2</i>     | -4.837 | 61  | 101 | 7.49E-05 |
| cg19430897 | <i>HIST1H2AB</i> | -2.584 | 125 | 37  | 7.50E-05 |
| cg26198776 | <i>EIF3S5</i>    | -4.559 | 44  | 118 | 7.50E-05 |
| cg23154002 | <i>ZNF278</i>    | -4.986 | 87  | 75  | 7.51E-05 |
| cg23191772 | <i>IDH3B</i>     | -4.610 | 33  | 129 | 7.52E-05 |
| cg11993300 | <i>NDST2</i>     | -5.892 | 77  | 85  | 7.52E-05 |
| cg22870256 | <i>FDFT1</i>     | -5.439 | 67  | 95  | 7.53E-05 |
| cg07707227 | <i>FLJ37927</i>  | -4.409 | 82  | 80  | 7.54E-05 |
| cg17241657 | <i>C4orf16</i>   | -4.976 | 53  | 109 | 7.54E-05 |
| cg23239842 | <i>NCOA2</i>     | -5.406 | 52  | 110 | 7.54E-05 |
| cg11595749 | <i>ATP5E</i>     | -5.430 | 62  | 100 | 7.55E-05 |
| cg20362772 | <i>PDLIM1</i>    | -5.594 | 76  | 86  | 7.55E-05 |
| cg14399078 | <i>ADPRH</i>     | -5.897 | 85  | 77  | 7.56E-05 |
| cg06084735 | <i>ENY2</i>      | -5.468 | 71  | 91  | 7.56E-05 |
| cg22309826 | <i>COPS3</i>     | -5.656 | 72  | 90  | 7.59E-05 |
| cg06499565 | <i>NDRG3</i>     | -3.928 | 101 | 61  | 7.61E-05 |
| cg10999429 | <i>ACVRL1</i>    | -4.589 | 84  | 78  | 7.62E-05 |
| cg24907852 | <i>ENOSF1</i>    | -3.804 | 69  | 93  | 7.63E-05 |
| cg09848420 | <i>ZCSL2</i>     | -4.554 | 69  | 93  | 7.66E-05 |
| cg26232187 | <i>NTRK3</i>     | -5.836 | 89  | 73  | 7.66E-05 |
| cg02740947 | <i>RAD51L3</i>   | -4.470 | 56  | 106 | 7.66E-05 |
| cg10624583 | <i>TENC1</i>     | -4.600 | 61  | 101 | 7.66E-05 |
| cg19722847 | <i>IPO8</i>      | -2.600 | 77  | 85  | 7.66E-05 |
| cg06990379 | <i>DPYD</i>      | -5.994 | 70  | 92  | 7.67E-05 |
| cg12775613 | <i>HTR1F</i>     | 2.699  | 67  | 95  | 7.67E-05 |
| cg13073894 | <i>ZNF566</i>    | -4.765 | 40  | 122 | 7.67E-05 |
| cg14613832 | <i>CYP26A1</i>   | -4.996 | 62  | 100 | 7.68E-05 |
| cg14026602 | <i>USP7</i>      | -3.887 | 117 | 45  | 7.69E-05 |
| cg24373760 | <i>LGR5</i>      | -4.463 | 60  | 102 | 7.69E-05 |

|            |           |        |     |     |          |
|------------|-----------|--------|-----|-----|----------|
| cg17125623 | NFATC3    | -3.322 | 110 | 50  | 7.70E-05 |
| cg00584022 | KRAS      | -4.931 | 40  | 122 | 7.70E-05 |
| cg10331048 | MRPL11    | -4.294 | 109 | 53  | 7.70E-05 |
| cg10356060 | DNAJC18   | -5.326 | 73  | 89  | 7.70E-05 |
| cg05227963 | RFC5      | -4.421 | 82  | 80  | 7.71E-05 |
| cg11140307 | CMTM4     | -5.142 | 63  | 99  | 7.72E-05 |
| cg12533010 | PSMA3     | -4.478 | 64  | 98  | 7.72E-05 |
| cg13362403 | UBE2Z     | -4.252 | 54  | 108 | 7.72E-05 |
| cg19339841 | CENPE     | -5.604 | 82  | 80  | 7.72E-05 |
| cg25836271 | RASGRP2   | -4.462 | 121 | 41  | 7.72E-05 |
| cg25515063 | POP5      | -5.073 | 44  | 118 | 7.72E-05 |
| cg15554401 | GJB4      | 2.813  | 74  | 88  | 7.73E-05 |
| cg11221132 | CYP2D7P1  | 1.856  | 83  | 79  | 7.74E-05 |
| cg15980408 | TMEM22    | -6.390 | 70  | 92  | 7.74E-05 |
| cg02581667 | ECH1      | -4.987 | 95  | 67  | 7.74E-05 |
| cg06090630 | TCEB2     | -5.769 | 67  | 95  | 7.74E-05 |
| cg19081759 | YWHAQ     | -5.867 | 58  | 104 | 7.75E-05 |
| cg11651717 | ABCA5     | -5.880 | 59  | 103 | 7.76E-05 |
| cg01651821 | LOC129531 | -5.138 | 48  | 114 | 7.77E-05 |
| cg02975259 | NCK1      | -6.298 | 70  | 92  | 7.77E-05 |
| cg24407308 | DGKZ      | -3.971 | 56  | 106 | 7.77E-05 |
| cg14334099 | PTPN12    | -4.921 | 119 | 43  | 7.77E-05 |
| cg25476145 | GALT      | -6.185 | 109 | 53  | 7.77E-05 |
| cg04876451 | PET112L   | -5.736 | 43  | 119 | 7.78E-05 |
| cg14651992 | TP53AP1   | -5.002 | 59  | 103 | 7.78E-05 |
| cg09837169 | TIAM2     | 3.051  | 60  | 102 | 7.79E-05 |
| cg04576855 | SERTAD2   | -5.889 | 109 | 53  | 7.79E-05 |
| cg10971346 | PIGV      | -4.664 | 100 | 62  | 7.79E-05 |
| cg03469082 | GABRG1    | -4.288 | 119 | 43  | 7.79E-05 |
| cg04053638 | SUCLG1    | -5.503 | 51  | 111 | 7.79E-05 |
| cg19455368 | ZNF587    | -5.103 | 75  | 87  | 7.79E-05 |
| cg10139846 | INADL     | -5.840 | 81  | 81  | 7.81E-05 |
| cg20430063 | MSRB3     | -5.096 | 119 | 43  | 7.81E-05 |
| cg24505122 | WNT5B     | 2.696  | 74  | 88  | 7.82E-05 |
| cg23205183 | NECAP1    | 1.000  | 106 | 55  | 7.85E-05 |
| cg23585575 | PPIF      | -4.358 | 48  | 114 | 7.85E-05 |
| cg18112431 | CDADC1    | -4.953 | 86  | 76  | 7.86E-05 |
| cg08420085 | ZDHHC24   | -4.752 | 102 | 60  | 7.86E-05 |
| cg18572014 | DCC       | 1.598  | 113 | 49  | 7.87E-05 |
| cg00301864 | RAB35     | -5.802 | 49  | 113 | 7.89E-05 |
| cg23539966 | RTN4      | -5.770 | 48  | 114 | 7.89E-05 |
| cg04577715 | SPINK1    | 3.535  | 87  | 75  | 7.90E-05 |
| cg12434258 | FLJ90396  | -5.527 | 88  | 74  | 7.91E-05 |
| cg17608500 | FLAD1     | -4.857 | 46  | 116 | 7.91E-05 |
| cg26371206 | BFSP1     | -3.885 | 77  | 85  | 7.92E-05 |
| cg07265622 | MED31     | -3.636 | 81  | 81  | 7.93E-05 |
| cg22659426 | CLN3      | -5.467 | 53  | 109 | 7.94E-05 |
| cg01954353 | MGC7036   | -4.219 | 111 | 51  | 7.95E-05 |
| cg05484920 | SNRP70    | -4.260 | 41  | 121 | 7.95E-05 |
| cg05927159 | WDR1      | -5.175 | 112 | 50  | 7.95E-05 |
| cg22063653 | BPGM      | -5.456 | 79  | 83  | 7.95E-05 |
| cg02735071 | EIF3S3    | -4.597 | 96  | 66  | 7.96E-05 |
| cg17918201 | ABI1      | -5.395 | 68  | 94  | 7.96E-05 |
| cg14737977 | ITGA3     | -4.454 | 66  | 96  | 7.96E-05 |
| cg11395917 | PLEKHB2   | -4.842 | 39  | 123 | 7.97E-05 |

|            |          |        |     |     |          |
|------------|----------|--------|-----|-----|----------|
| cg01064957 | SNX2     | -4.240 | 76  | 86  | 7.98E-05 |
| cg05725452 | SDF2L1   | -5.351 | 42  | 120 | 7.98E-05 |
| cg23287547 | MYO5A    | -4.756 | 101 | 61  | 7.98E-05 |
| cg25055403 | NEDD8    | -4.890 | 95  | 67  | 7.98E-05 |
| cg23459997 | JAGN1    | -5.410 | 38  | 124 | 7.98E-05 |
| cg15513137 | SCN2A2   | -2.996 | 87  | 71  | 7.98E-05 |
| cg11880892 | PPA1     | -4.578 | 104 | 58  | 7.99E-05 |
| cg05689121 | TNRC6A   | -4.475 | 99  | 63  | 7.99E-05 |
| cg03076324 | DNAJC1   | -5.909 | 68  | 94  | 7.99E-05 |
| cg03996465 | SUGT1    | -5.060 | 102 | 60  | 7.99E-05 |
| cg15565872 | PTX3     | -4.222 | 74  | 88  | 7.99E-05 |
| cg16114640 | THSD1    | -3.762 | 82  | 80  | 7.99E-05 |
| cg20227766 | G1P3     | -5.166 | 98  | 64  | 7.99E-05 |
| cg20813773 | MGC34713 | -5.130 | 49  | 113 | 7.99E-05 |
| cg10506212 | GGCX     | -5.579 | 64  | 98  | 8.00E-05 |
| cg27089973 | DMTF1    | -4.523 | 66  | 96  | 8.00E-05 |
| cg22991148 | C21orf29 | -3.446 | 85  | 77  | 8.00E-05 |
| cg00973677 | CHRM2    | -5.439 | 80  | 82  | 8.00E-05 |
| cg03712708 | CKS2     | -4.808 | 111 | 51  | 8.00E-05 |
| cg16732901 | FLJ35784 | -1.890 | 97  | 65  | 8.00E-05 |
| cg09509576 | GRB2     | -3.922 | 76  | 86  | 8.03E-05 |
| cg14445437 | PIGS     | -5.273 | 85  | 77  | 8.03E-05 |
| cg18986713 | LEPROTL1 | -5.504 | 76  | 86  | 8.03E-05 |
| cg06700265 | DUSP16   | -5.450 | 60  | 102 | 8.03E-05 |
| cg18380974 | WIG1     | -2.963 | 96  | 66  | 8.03E-05 |
| cg20420254 | SMPD1    | -6.087 | 43  | 119 | 8.03E-05 |
| cg22052955 | RARG     | -3.061 | 69  | 93  | 8.03E-05 |
| cg24139421 | SLC22A18 | -5.224 | 81  | 81  | 8.03E-05 |
| cg15309264 | VRK2     | -3.598 | 93  | 69  | 8.04E-05 |
| cg11611600 | ADAMTSL3 | -3.670 | 93  | 69  | 8.04E-05 |
| cg21559783 | FLJ36779 | -4.370 | 81  | 81  | 8.05E-05 |
| cg14039952 | NPM1     | -4.367 | 103 | 59  | 8.06E-05 |
| cg21453677 | HIST1H1C | -5.051 | 76  | 86  | 8.06E-05 |
| cg01653110 | VAMP4    | -4.206 | 53  | 109 | 8.07E-05 |
| cg03148461 | BRAF     | -3.589 | 40  | 122 | 8.07E-05 |
| cg20112035 | C1orf48  | -3.268 | 49  | 113 | 8.07E-05 |
| cg21309049 | STK17A   | -5.527 | 65  | 97  | 8.07E-05 |
| cg24291845 | WBP2     | -5.549 | 113 | 49  | 8.07E-05 |
| cg11222041 | TOR1A    | -4.438 | 122 | 40  | 8.07E-05 |
| cg24679082 | ETV4     | -4.910 | 60  | 102 | 8.09E-05 |
| cg26799802 | PHLDA2   | -4.113 | 96  | 66  | 8.09E-05 |
| cg06319346 | CHRFAM7A | 1.874  | 69  | 93  | 8.09E-05 |
| cg13919215 | POLR2K   | -4.160 | 47  | 115 | 8.10E-05 |
| cg04317366 | PRPF8    | -4.234 | 112 | 50  | 8.10E-05 |
| cg18335243 | PTGS2    | -4.667 | 88  | 74  | 8.10E-05 |
| cg19524009 | NEK3     | 1.912  | 94  | 68  | 8.10E-05 |
| cg11295902 | SF1      | -4.863 | 47  | 115 | 8.11E-05 |
| cg06952236 | RASGRP1  | -4.444 | 91  | 71  | 8.11E-05 |
| cg02741249 | GGA2     | -4.184 | 42  | 120 | 8.13E-05 |
| cg04496615 | PPP3R1   | -5.878 | 88  | 74  | 8.18E-05 |
| cg18205517 | PP2447   | -5.128 | 31  | 131 | 8.18E-05 |
| cg24719601 | PHOX2B   | -3.355 | 71  | 91  | 8.18E-05 |
| cg25729957 | C10orf32 | -4.793 | 112 | 50  | 8.18E-05 |
| cg18954434 | GTSE1    | -4.811 | 105 | 57  | 8.19E-05 |
| cg08291539 | DENND4A  | -5.997 | 75  | 87  | 8.19E-05 |

|            |                 |        |     |     |          |
|------------|-----------------|--------|-----|-----|----------|
| cg02630122 | <i>HTF9C</i>    | -4.077 | 101 | 61  | 8.21E-05 |
| cg06100291 | <i>CLSPN</i>    | -4.037 | 133 | 29  | 8.22E-05 |
| cg10786880 | <i>PRKAA1</i>   | -5.524 | 33  | 129 | 8.22E-05 |
| cg10864941 | <i>LYZL4</i>    | 2.420  | 68  | 94  | 8.22E-05 |
| cg23874078 | <i>CEPT1</i>    | -3.871 | 85  | 77  | 8.22E-05 |
| cg06913228 | <i>UBE2J1</i>   | -5.981 | 51  | 111 | 8.22E-05 |
| cg00964109 | <i>UBL7</i>     | -5.372 | 42  | 120 | 8.23E-05 |
| cg13878456 | <i>ZNFN1A3</i>  | -1.717 | 84  | 78  | 8.23E-05 |
| cg24532669 | <i>BRMS1</i>    | -4.791 | 47  | 115 | 8.23E-05 |
| cg18153124 | <i>KCNQ3</i>    | -4.266 | 67  | 95  | 8.24E-05 |
| cg21612046 | <i>ZNF550</i>   | -5.406 | 56  | 106 | 8.24E-05 |
| cg15580043 | <i>SS18L1</i>   | -4.768 | 52  | 110 | 8.25E-05 |
| cg00354572 | <i>FLJ21963</i> | -3.991 | 80  | 82  | 8.25E-05 |
| cg11228872 | <i>CALR</i>     | -5.285 | 112 | 50  | 8.25E-05 |
| cg08715837 | <i>TUBA8</i>    | -3.667 | 57  | 105 | 8.27E-05 |
| cg11792664 | <i>UQCR</i>     | -5.144 | 59  | 103 | 8.28E-05 |
| cg16094520 | <i>SHMT1</i>    | -3.948 | 105 | 57  | 8.28E-05 |
| cg24515202 | <i>TTC9C</i>    | -4.421 | 81  | 81  | 8.28E-05 |
| cg06077733 | <i>UBE2D1</i>   | -7.270 | 105 | 57  | 8.30E-05 |
| cg15452573 | <i>SNCA</i>     | -4.802 | 75  | 87  | 8.30E-05 |
| cg12454725 | <i>SYT17</i>    | -5.683 | 93  | 69  | 8.30E-05 |
| cg21516287 | <i>LRRRC61</i>  | -3.683 | 105 | 57  | 8.30E-05 |
| cg24615044 | <i>MGC3123</i>  | -4.869 | 85  | 77  | 8.30E-05 |
| cg07328495 | <i>SMC2L1</i>   | -4.845 | 100 | 62  | 8.32E-05 |
| cg09458394 | <i>RABGGTB</i>  | -4.301 | 44  | 118 | 8.33E-05 |
| cg15316334 | <i>CEACAM5</i>  | -1.865 | 76  | 86  | 8.33E-05 |
| cg15970621 | <i>PHKG2</i>    | -5.718 | 58  | 104 | 8.33E-05 |
| cg09276883 | <i>HHAT</i>     | -3.286 | 100 | 62  | 8.34E-05 |
| cg25920951 | <i>FAM70B</i>   | -5.215 | 81  | 81  | 8.36E-05 |
| cg02407785 | <i>PCDH9</i>    | -5.102 | 77  | 85  | 8.37E-05 |
| cg16806347 | <i>FUK</i>      | -5.068 | 84  | 78  | 8.37E-05 |
| cg12406417 | <i>BCR</i>      | -4.224 | 93  | 69  | 8.37E-05 |
| cg03277112 | <i>CRSP3</i>    | -4.559 | 75  | 87  | 8.39E-05 |
| cg11847459 | <i>MBIP</i>     | -5.672 | 49  | 113 | 8.40E-05 |
| cg09622447 | <i>CBS</i>      | -3.258 | 79  | 83  | 8.44E-05 |
| cg23517677 | <i>POLR2G</i>   | 1.555  | 32  | 130 | 8.44E-05 |
| cg06456512 | <i>ANP32A</i>   | -3.255 | 54  | 108 | 8.45E-05 |
| cg02995853 | <i>APBB3</i>    | -4.241 | 67  | 95  | 8.45E-05 |
| cg02902770 | <i>RARRES2</i>  | 2.249  | 57  | 105 | 8.45E-05 |
| cg19233923 | <i>OTUB1</i>    | -5.565 | 99  | 63  | 8.45E-05 |
| cg13878641 | <i>GNAI3</i>    | -4.931 | 49  | 113 | 8.46E-05 |
| cg06251489 | <i>STIM2</i>    | -5.732 | 75  | 87  | 8.46E-05 |
| cg26493932 | <i>ZNF664</i>   | -5.246 | 63  | 99  | 8.46E-05 |
| cg04551925 | <i>AQP1</i>     | 0.671  | 64  | 98  | 8.54E-05 |
| cg06723357 | <i>CUEDC1</i>   | 0.361  | 43  | 119 | 8.54E-05 |
| cg23311628 | <i>RAB8B</i>    | -6.113 | 101 | 61  | 8.54E-05 |
| cg11296363 | <i>FTSJ3</i>    | -5.590 | 98  | 64  | 8.57E-05 |
| cg21022435 | <i>NFRKB</i>    | 3.137  | 80  | 82  | 8.60E-05 |
| cg03950654 | <i>ARRB2</i>    | -5.476 | 72  | 90  | 8.60E-05 |
| cg26530200 | <i>ZNF140</i>   | -3.430 | 64  | 98  | 8.61E-05 |
| cg12548064 | <i>ANKRD46</i>  | -5.325 | 74  | 88  | 8.61E-05 |
| cg11738011 | <i>PUS1</i>     | -5.898 | 65  | 97  | 8.63E-05 |
| cg21243909 | <i>RCC2</i>     | -5.083 | 80  | 82  | 8.63E-05 |
| cg01743370 | <i>GCA</i>      | -5.910 | 83  | 79  | 8.64E-05 |
| cg03961189 | <i>SH2BP1</i>   | -6.229 | 109 | 53  | 8.64E-05 |

|            |                 |        |     |     |          |
|------------|-----------------|--------|-----|-----|----------|
| cg20295671 | <i>YPEL1</i>    | -6.497 | 116 | 46  | 8.64E-05 |
| cg12531003 | <i>ZNF580</i>   | -4.882 | 53  | 109 | 8.66E-05 |
| cg16257086 | <i>CD46</i>     | -5.173 | 76  | 86  | 8.67E-05 |
| cg22384366 | <i>PIK3CA</i>   | -4.518 | 51  | 111 | 8.68E-05 |
| cg07571117 | <i>FAM98A</i>   | -5.853 | 122 | 40  | 8.68E-05 |
| cg26601286 | <i>NSUN4</i>    | -5.905 | 77  | 85  | 8.68E-05 |
| cg13859216 | <i>HSPA9B</i>   | -5.591 | 75  | 87  | 8.69E-05 |
| cg24923526 | <i>SH3GL1</i>   | -4.782 | 67  | 95  | 8.70E-05 |
| cg08592230 | <i>GP3SM3</i>   | -4.960 | 49  | 113 | 8.72E-05 |
| cg00858899 | <i>CCND1</i>    | -3.650 | 34  | 128 | 8.74E-05 |
| cg01124961 | <i>RC74</i>     | -4.474 | 113 | 49  | 8.74E-05 |
| cg06011292 | <i>MYH10</i>    | -5.195 | 41  | 121 | 8.74E-05 |
| cg06161738 | <i>GALNT11</i>  | -5.354 | 67  | 95  | 8.74E-05 |
| cg09438266 | <i>MGC13138</i> | -5.414 | 50  | 112 | 8.74E-05 |
| cg26259575 | <i>TUBB</i>     | -5.336 | 78  | 84  | 8.74E-05 |
| cg18248891 | <i>PTK6</i>     | -4.727 | 68  | 94  | 8.74E-05 |
| cg18947521 | <i>H3F3A</i>    | -5.161 | 72  | 90  | 8.74E-05 |
| cg25746138 | <i>MLL4</i>     | -5.051 | 119 | 43  | 8.74E-05 |
| cg05780311 | <i>STAT5B</i>   | -5.660 | 64  | 98  | 8.75E-05 |
| cg14859074 | <i>CLDN1</i>    | -5.674 | 78  | 84  | 8.75E-05 |
| cg10708828 | <i>NFIL3</i>    | -5.249 | 78  | 84  | 8.75E-05 |
| cg22634689 | <i>TMEM121</i>  | -4.598 | 78  | 84  | 8.75E-05 |
| cg09738100 | <i>MRPS9</i>    | -5.310 | 103 | 59  | 8.75E-05 |
| cg25555137 | <i>BCR</i>      | -5.353 | 72  | 90  | 8.75E-05 |
| cg23933345 | <i>AP4B1</i>    | -4.884 | 105 | 57  | 8.75E-05 |
| cg03519303 | <i>CCRN4L</i>   | -5.145 | 42  | 120 | 8.76E-05 |
| cg02909042 | <i>C14orf32</i> | -5.479 | 63  | 99  | 8.76E-05 |
| cg16391792 | <i>LIPC</i>     | 1.072  | 64  | 98  | 8.77E-05 |
| cg00763679 | <i>44076</i>    | -4.300 | 99  | 63  | 8.78E-05 |
| cg05717160 | <i>USMG5</i>    | -4.600 | 40  | 122 | 8.78E-05 |
| cg05339305 | <i>DIPA</i>     | -5.055 | 93  | 69  | 8.78E-05 |
| cg10821722 | <i>MAP4K2</i>   | 3.604  | 73  | 89  | 8.79E-05 |
| cg18652852 | <i>MAFF</i>     | -4.712 | 43  | 119 | 8.81E-05 |
| cg22048492 | <i>HTATIP</i>   | -4.965 | 95  | 67  | 8.81E-05 |
| cg02344201 | <i>ELL</i>      | -4.899 | 83  | 79  | 8.81E-05 |
| cg26577178 | <i>HRB2</i>     | -4.569 | 78  | 84  | 8.82E-05 |
| cg27014642 | <i>CELSR2</i>   | -4.612 | 75  | 87  | 8.82E-05 |
| cg27501380 | <i>RBBP6</i>    | -5.472 | 75  | 87  | 8.83E-05 |
| cg15054260 | <i>RIPK2</i>    | -4.203 | 99  | 63  | 8.87E-05 |
| cg20979602 | <i>PAPD4</i>    | -5.036 | 72  | 90  | 8.88E-05 |
| cg14402472 | <i>HLA-F</i>    | -5.272 | 57  | 105 | 8.89E-05 |
| cg07098866 | <i>MEGF11</i>   | -5.453 | 87  | 75  | 8.90E-05 |
| cg07444907 | <i>UBLCP1</i>   | -5.211 | 70  | 92  | 8.90E-05 |
| cg00812502 | <i>DGCR2</i>    | -6.091 | 70  | 92  | 8.91E-05 |
| cg21389013 | <i>PPM1G</i>    | -5.321 | 89  | 73  | 8.91E-05 |
| cg16725097 | <i>EBNA1BP2</i> | -4.298 | 62  | 100 | 8.91E-05 |
| cg18263030 | <i>MARK3</i>    | -5.015 | 85  | 77  | 8.92E-05 |
| cg16514995 | <i>CCDC76</i>   | 2.782  | 111 | 51  | 8.93E-05 |
| cg16788436 | <i>GRLF1</i>    | 3.640  | 73  | 89  | 8.94E-05 |
| cg18568653 | <i>SERGEF</i>   | -4.842 | 74  | 88  | 8.94E-05 |
| cg09419116 | <i>SEC11L3</i>  | -5.146 | 63  | 99  | 8.96E-05 |
| cg12082568 | <i>CITED2</i>   | -4.332 | 80  | 82  | 8.96E-05 |
| cg18071588 | <i>DIDO1</i>    | -6.160 | 45  | 117 | 8.98E-05 |
| cg08928646 | <i>UBE1L2</i>   | -4.220 | 70  | 92  | 8.98E-05 |
| cg06540105 | <i>CCDC74A</i>  | -4.479 | 86  | 76  | 8.98E-05 |

|            |               |        |     |     |          |
|------------|---------------|--------|-----|-----|----------|
| cg03900284 | P518          | 1.592  | 100 | 62  | 8.99E-05 |
| cg17886204 | DKFZp434I1020 | -5.682 | 57  | 105 | 8.99E-05 |
| cg19318511 | C9orf30       | -4.686 | 71  | 91  | 9.01E-05 |
| cg10172318 | DRAP1         | -4.511 | 83  | 79  | 9.01E-05 |
| cg27462969 | SERBP1        | -4.859 | 101 | 61  | 9.03E-05 |
| cg05026033 | ELP3          | -3.893 | 121 | 41  | 9.03E-05 |
| cg19280014 | MTX2          | -5.033 | 41  | 121 | 9.03E-05 |
| cg12455562 | BTN2A3        | 1.326  | 84  | 78  | 9.04E-05 |
| cg22534599 | ALAS1         | -6.617 | 79  | 83  | 9.04E-05 |
| cg12612336 | PRPSAP1       | -5.498 | 90  | 72  | 9.05E-05 |
| cg26991199 | FUSIP1        | -2.956 | 55  | 107 | 9.05E-05 |
| cg16978263 | IFT80         | -4.342 | 83  | 79  | 9.05E-05 |
| cg05348272 | TBCD          | -5.483 | 53  | 109 | 9.07E-05 |
| cg14028823 | EEF2K         | -5.264 | 102 | 60  | 9.08E-05 |
| cg00382515 | MRPL44        | -5.828 | 58  | 104 | 9.10E-05 |
| cg05368762 | TEGT          | -5.325 | 83  | 79  | 9.10E-05 |
| cg25096582 | CFL2          | -5.236 | 82  | 80  | 9.14E-05 |
| cg12291552 | GOLPH4        | -5.912 | 80  | 82  | 9.14E-05 |
| cg00796728 | FUT4          | -4.706 | 57  | 105 | 9.14E-05 |
| cg10368981 | DPYSL2        | -5.784 | 49  | 113 | 9.14E-05 |
| cg17155596 | STAMBPL1      | -4.694 | 94  | 68  | 9.14E-05 |
| cg22905097 | EPSTI1        | -5.423 | 64  | 98  | 9.14E-05 |
| cg25153340 | PLEKHK1       | -4.322 | 80  | 82  | 9.14E-05 |
| cg25927124 | PRKAR2A       | -5.627 | 72  | 90  | 9.14E-05 |
| cg03622431 | DNASE2B       | 2.724  | 73  | 89  | 9.15E-05 |
| cg15119375 | MGC3020       | -5.482 | 71  | 91  | 9.15E-05 |
| cg15247144 | PYCARD        | -5.430 | 66  | 96  | 9.15E-05 |
| cg21540749 | MOCS2         | -5.087 | 47  | 115 | 9.15E-05 |
| cg27258787 | ILF3          | -5.232 | 54  | 108 | 9.16E-05 |
| cg10922163 | C9orf23       | -3.579 | 82  | 80  | 9.17E-05 |
| cg11713008 | HRSP12        | -4.783 | 102 | 60  | 9.19E-05 |
| cg07842593 | SEPHS2        | -4.756 | 107 | 55  | 9.21E-05 |
| cg12194493 | PIGG          | -6.124 | 68  | 94  | 9.21E-05 |
| cg09503780 | GORASP2       | -5.475 | 52  | 110 | 9.22E-05 |
| cg03007571 | HIST1H2BD     | -3.943 | 71  | 91  | 9.22E-05 |
| cg15399561 | HRSP12        | -5.325 | 92  | 70  | 9.22E-05 |
| cg15348640 | ACAA1         | -5.428 | 107 | 55  | 9.23E-05 |
| cg00792687 | C8orf41       | -4.405 | 40  | 122 | 9.25E-05 |
| cg16792632 | ESR2          | -4.971 | 44  | 118 | 9.25E-05 |
| cg06593568 | C1orf48       | -4.503 | 90  | 72  | 9.26E-05 |
| cg10455676 | MTIF2         | -4.683 | 64  | 98  | 9.27E-05 |
| cg27164762 | HIGD2A        | -5.770 | 111 | 51  | 9.27E-05 |
| cg12645567 | TFAP4         | -5.489 | 94  | 68  | 9.28E-05 |
| cg06384026 | PPFIA1        | -5.234 | 42  | 120 | 9.29E-05 |
| cg15646782 | FAM55C        | -5.230 | 99  | 63  | 9.30E-05 |
| cg22878324 | PURB          | -5.431 | 97  | 65  | 9.31E-05 |
| cg01249910 | SAT2          | -3.988 | 99  | 63  | 9.31E-05 |
| cg12266551 | TOMM40        | -5.484 | 74  | 88  | 9.32E-05 |
| cg13563405 | ASAH1         | -5.444 | 111 | 51  | 9.32E-05 |
| cg14104257 | SLC36A1       | -5.346 | 98  | 64  | 9.32E-05 |
| cg16803817 | TMEM50B       | -3.950 | 101 | 61  | 9.32E-05 |
| cg21918026 | PRMT7         | -3.318 | 60  | 102 | 9.32E-05 |
| cg10893437 | C13orf8       | -3.471 | 52  | 110 | 9.33E-05 |
| cg10604333 | ZNF222        | -2.623 | 110 | 52  | 9.34E-05 |
| cg21218093 | ZNF335        | -4.495 | 87  | 75  | 9.34E-05 |

|            |                  |        |     |     |          |
|------------|------------------|--------|-----|-----|----------|
| cg24801210 | <i>PCNP</i>      | -2.891 | 119 | 43  | 9.35E-05 |
| cg02391387 | <i>IMMP2L</i>    | -5.847 | 112 | 50  | 9.35E-05 |
| cg07214572 | <i>LHX9</i>      | -4.446 | 82  | 80  | 9.35E-05 |
| cg13945069 | <i>DDX59</i>     | -4.351 | 81  | 81  | 9.35E-05 |
| cg15810326 | <i>LOC90826</i>  | -4.292 | 44  | 118 | 9.35E-05 |
| cg18879041 | <i>LIMS3</i>     | 0.923  | 71  | 91  | 9.35E-05 |
| cg24442290 | <i>C20orf111</i> | -4.122 | 72  | 90  | 9.35E-05 |
| cg24731756 | <i>ILK</i>       | -5.283 | 36  | 126 | 9.36E-05 |
| cg13323752 | <i>SLC2A14</i>   | -4.409 | 97  | 65  | 9.37E-05 |
| cg16584911 | <i>KIAA0828</i>  | -2.634 | 101 | 61  | 9.37E-05 |
| cg04323187 | <i>CCDC24</i>    | -5.659 | 54  | 108 | 9.38E-05 |
| cg23660999 | <i>PDDC1</i>     | -5.256 | 44  | 118 | 9.38E-05 |
| cg07919162 | <i>SF4</i>       | -4.490 | 33  | 129 | 9.38E-05 |
| cg16188038 | <i>ZNF622</i>    | -5.664 | 102 | 60  | 9.38E-05 |
| cg23894003 | <i>FBS1</i>      | 2.015  | 106 | 56  | 9.38E-05 |
| cg07934026 | <i>ABCA11</i>    | -5.422 | 112 | 50  | 9.39E-05 |
| cg02229516 | <i>TRMT1</i>     | -4.725 | 43  | 119 | 9.39E-05 |
| cg08771731 | <i>BASP1</i>     | -4.399 | 83  | 79  | 9.39E-05 |
| cg00290028 | <i>RFXAP</i>     | -5.380 | 85  | 77  | 9.40E-05 |
| cg26767761 | <i>ZNF198</i>    | -5.293 | 42  | 120 | 9.40E-05 |
| cg08548086 | <i>HEXB</i>      | -5.237 | 55  | 107 | 9.41E-05 |
| cg19105690 | <i>LYPLA3</i>    | -5.299 | 51  | 111 | 9.41E-05 |
| cg12504957 | <i>MDM2</i>      | -5.587 | 62  | 100 | 9.43E-05 |
| cg02905881 | <i>MSH6</i>      | -4.511 | 66  | 96  | 9.45E-05 |
| cg03907454 | <i>KIF2C</i>     | -4.204 | 59  | 103 | 9.45E-05 |
| cg05189291 | <i>ICF45</i>     | -5.333 | 63  | 99  | 9.47E-05 |
| cg17159537 | <i>PEX11G</i>    | -4.516 | 99  | 63  | 9.47E-05 |
| cg05365525 | <i>DEPDC6</i>    | -4.370 | 70  | 92  | 9.47E-05 |
| cg12455187 | <i>CCL5</i>      | 1.278  | 83  | 79  | 9.47E-05 |
| cg27190537 | <i>SUMF2</i>     | -5.630 | 85  | 77  | 9.47E-05 |
| cg23739036 | <i>PEX10</i>     | -6.585 | 70  | 92  | 9.49E-05 |
| cg10763059 | <i>PTPN12</i>    | -4.378 | 97  | 63  | 9.50E-05 |
| cg07051140 | <i>MGC15875</i>  | -5.137 | 101 | 61  | 9.51E-05 |
| cg14514226 | <i>TMCC2</i>     | -4.634 | 47  | 115 | 9.52E-05 |
| cg25054311 | <i>SLC26A2</i>   | -3.192 | 59  | 103 | 9.53E-05 |
| cg11939047 | <i>NARG2</i>     | -5.945 | 60  | 102 | 9.53E-05 |
| cg24229819 | <i>DUSP3</i>     | -5.349 | 120 | 42  | 9.54E-05 |
| cg03429582 | <i>RBM4</i>      | -5.345 | 39  | 123 | 9.55E-05 |
| cg09114441 | <i>ZNF546</i>    | -5.355 | 58  | 104 | 9.55E-05 |
| cg23877831 | <i>MRPL51</i>    | -4.199 | 43  | 119 | 9.57E-05 |
| cg04447123 | <i>RHOBTB2</i>   | -5.725 | 66  | 96  | 9.57E-05 |
| cg06237414 | <i>MTX1</i>      | -4.455 | 60  | 102 | 9.57E-05 |
| cg10124491 | <i>MGC29891</i>  | -4.717 | 47  | 115 | 9.57E-05 |
| cg22464182 | <i>ACVR2A</i>    | -4.975 | 101 | 61  | 9.58E-05 |
| cg21140292 | <i>SMARCA2</i>   | -4.897 | 50  | 112 | 9.58E-05 |
| cg22297305 | <i>PRODH</i>     | -4.887 | 91  | 71  | 9.58E-05 |
| cg15652120 | <i>ELK3</i>      | -3.832 | 37  | 125 | 9.62E-05 |
| cg19905754 | <i>ANKRD37</i>   | -6.259 | 97  | 65  | 9.62E-05 |
| cg20652889 | <i>UNC84B</i>    | -4.374 | 86  | 76  | 9.63E-05 |
| cg27437944 | <i>FXR1</i>      | -5.330 | 84  | 78  | 9.63E-05 |
| cg11911418 | <i>ELAC1</i>     | 3.645  | 64  | 98  | 9.65E-05 |
| cg17002259 | <i>CDC42SE1</i>  | -5.185 | 53  | 109 | 9.65E-05 |
| cg04985146 | <i>MRPL12</i>    | -5.691 | 70  | 92  | 9.65E-05 |
| cg27072387 | <i>LTBP1</i>     | -4.539 | 60  | 102 | 9.65E-05 |
| cg21872393 | <i>MRCL3</i>     | -4.949 | 73  | 89  | 9.68E-05 |

|            |           |        |     |     |          |
|------------|-----------|--------|-----|-----|----------|
| cg07652553 | ZCCHC17   | -4.953 | 71  | 91  | 9.69E-05 |
| cg11313124 | WIG1      | -4.719 | 82  | 80  | 9.69E-05 |
| cg19972859 | PURA      | -5.003 | 90  | 72  | 9.69E-05 |
| cg23698058 | PRKACB    | -6.187 | 59  | 103 | 9.69E-05 |
| cg20636078 | ATR       | -4.958 | 71  | 91  | 9.70E-05 |
| cg22721186 | ATAD2     | -5.554 | 64  | 98  | 9.72E-05 |
| cg23350446 | PDCD2     | -3.986 | 79  | 83  | 9.72E-05 |
| cg08504049 | ZNF264    | -3.336 | 96  | 66  | 9.73E-05 |
| cg07525445 | TPM1      | -4.344 | 88  | 74  | 9.74E-05 |
| cg22161476 | FSTL5     | -4.218 | 85  | 77  | 9.74E-05 |
| cg21391660 | LLGL2     | -4.895 | 70  | 92  | 9.74E-05 |
| cg21796825 | TMEM5     | -6.139 | 54  | 108 | 9.74E-05 |
| cg12073949 | raptor    | -4.936 | 82  | 80  | 9.75E-05 |
| cg02963198 | NOTCH2NL  | -5.225 | 80  | 82  | 9.76E-05 |
| cg21373526 | RAB30     | -4.292 | 69  | 93  | 9.77E-05 |
| cg00429618 | ZNF322B   | -2.516 | 59  | 103 | 9.78E-05 |
| cg22379207 | MGC62100  | -4.839 | 52  | 110 | 9.78E-05 |
| cg15693363 | GARS      | -5.677 | 55  | 107 | 9.78E-05 |
| cg20947775 | SCD5      | -4.405 | 87  | 75  | 9.78E-05 |
| cg22737001 | RUNX3     | -4.153 | 82  | 80  | 9.79E-05 |
| cg06720956 | ONECUT1   | -4.231 | 72  | 90  | 9.79E-05 |
| cg23824815 | ZNF333    | -4.322 | 85  | 77  | 9.81E-05 |
| cg04825431 | ZNF239    | 2.482  | 71  | 91  | 9.82E-05 |
| cg17710288 | NPM3      | -4.011 | 94  | 68  | 9.82E-05 |
| cg04717045 | CCND1     | 2.160  | 72  | 90  | 9.83E-05 |
| cg22511633 | TBL2      | -4.291 | 76  | 86  | 9.83E-05 |
| cg09630437 | SLC39A3   | -3.003 | 58  | 104 | 9.84E-05 |
| cg15042806 | DCTN5     | -5.063 | 71  | 91  | 9.85E-05 |
| cg27553433 | SPTLC2    | -4.708 | 36  | 126 | 9.85E-05 |
| cg18107072 | CGI-38    | -3.455 | 84  | 78  | 9.87E-05 |
| cg05225390 | ZW10      | -5.615 | 54  | 108 | 9.87E-05 |
| cg05797656 | DDX42     | -4.977 | 75  | 87  | 9.87E-05 |
| cg08170622 | CCND1     | -4.528 | 80  | 82  | 9.87E-05 |
| cg11639397 | VASP      | -5.727 | 75  | 87  | 9.87E-05 |
| cg20117778 | TAF12     | -5.008 | 74  | 88  | 9.87E-05 |
| cg25826526 | C20orf20  | -4.754 | 40  | 122 | 9.87E-05 |
| cg26674929 | IREB2     | -6.232 | 72  | 90  | 9.87E-05 |
| cg16544272 | PIGW      | -4.964 | 44  | 118 | 9.89E-05 |
| cg08412305 | BRP44     | -5.532 | 85  | 77  | 9.90E-05 |
| cg00581156 | HSA9761   | -5.319 | 31  | 131 | 9.91E-05 |
| cg14296147 | CSRP2BP   | -5.627 | 62  | 100 | 9.91E-05 |
| cg21787206 | PSMD9     | -4.931 | 101 | 61  | 9.91E-05 |
| cg21401794 | LRRC8C    | -5.693 | 68  | 94  | 9.91E-05 |
| cg02802055 | USP20     | -4.728 | 54  | 108 | 9.94E-05 |
| cg00256166 | KLHL25    | -4.475 | 107 | 55  | 9.95E-05 |
| cg00731459 | HDAC4     | -5.228 | 96  | 66  | 9.96E-05 |
| cg22628840 | LOC116143 | -5.546 | 94  | 68  | 9.96E-05 |
| cg22190861 | GPR155    | -5.841 | 53  | 109 | 9.96E-05 |
| cg20543571 | C15orf43  | 3.094  | 77  | 85  | 9.98E-05 |
| cg01959848 | MED19     | -5.182 | 61  | 101 | 1.00E-04 |
| cg03793131 | ELOVL1    | -4.868 | 77  | 85  | 1.00E-04 |
| cg19373170 | SFMBT1    | -4.881 | 63  | 99  | 1.00E-04 |
| cg21415698 | EXPH5     | -4.555 | 95  | 67  | 1.00E-04 |
| cg00609097 | TESK2     | -5.888 | 84  | 78  | 1.00E-04 |
| cg20102673 | KCNH3     | -2.226 | 82  | 80  | 1.00E-04 |

|            |                  |        |     |     |          |
|------------|------------------|--------|-----|-----|----------|
| cg19061982 | <i>POLR1B</i>    | -5.111 | 71  | 91  | 1.00E-04 |
| cg26287783 | <i>C6orf64</i>   | -4.668 | 81  | 81  | 1.00E-04 |
| cg25716740 | <i>WDR50</i>     | -5.556 | 54  | 108 | 1.00E-04 |
| cg25026013 | <i>TAX1BP3</i>   | -5.273 | 68  | 94  | 1.00E-04 |
| cg26967875 | <i>KLC2</i>      | -4.710 | 59  | 103 | 1.01E-04 |
| cg00268009 | <i>ADH5</i>      | -5.246 | 60  | 102 | 1.01E-04 |
| cg04853383 | <i>C12orf49</i>  | -5.500 | 90  | 72  | 1.01E-04 |
| cg13536448 | <i>HIST2H2AA</i> | -4.348 | 62  | 100 | 1.01E-04 |
| cg01578341 | <i>RKHD3</i>     | -4.018 | 50  | 112 | 1.01E-04 |
| cg10762132 | <i>SLC20A1</i>   | -6.412 | 92  | 70  | 1.01E-04 |
| cg13669465 | <i>EXOSC1</i>    | -5.563 | 45  | 117 | 1.01E-04 |
| cg19652869 | <i>SLC30A1</i>   | -5.777 | 81  | 81  | 1.01E-04 |
| cg02705666 | <i>GTF2B</i>     | -5.077 | 61  | 101 | 1.01E-04 |
| cg27601582 | <i>ITGB1BP3</i>  | -4.069 | 63  | 99  | 1.02E-04 |
| cg04206644 | <i>DDX26</i>     | -5.372 | 90  | 72  | 1.02E-04 |
| cg21111868 | <i>EGR4</i>      | -3.646 | 106 | 56  | 1.02E-04 |
| cg26477793 | <i>ACTR1A</i>    | -5.384 | 58  | 104 | 1.02E-04 |
| cg05418129 | <i>C9orf26</i>   | 1.421  | 87  | 61  | 1.02E-04 |
| cg13208732 | <i>PLAG1</i>     | -6.247 | 84  | 78  | 1.02E-04 |
| cg21770145 | <i>PCYT2</i>     | 2.800  | 74  | 88  | 1.02E-04 |
| cg15821095 | <i>RBM15B</i>    | 1.827  | 111 | 51  | 1.02E-04 |
| cg20411654 | <i>CLPB</i>      | -5.333 | 45  | 117 | 1.02E-04 |
| cg02665570 | <i>LYPLAL1</i>   | -5.566 | 112 | 50  | 1.02E-04 |
| cg18652121 | <i>NDUFB5</i>    | -4.989 | 117 | 45  | 1.02E-04 |
| cg17533847 | <i>CBX4</i>      | -5.580 | 61  | 101 | 1.02E-04 |
| cg26132665 | <i>C6orf165</i>  | -4.270 | 28  | 134 | 1.02E-04 |
| cg06476337 | <i>NDUFS4</i>    | -3.155 | 90  | 70  | 1.02E-04 |
| cg23619829 | <i>MTFR1</i>     | -4.819 | 41  | 121 | 1.02E-04 |
| cg03790207 | <i>PEX6</i>      | -5.635 | 62  | 100 | 1.02E-04 |
| cg12230010 | <i>EIF4EBP2</i>  | -4.160 | 45  | 117 | 1.02E-04 |
| cg06887170 | <i>FAM14A</i>    | -4.399 | 55  | 107 | 1.02E-04 |
| cg26850503 | <i>DACT1</i>     | -4.940 | 41  | 121 | 1.02E-04 |
| cg08820821 | <i>SNRP70</i>    | -4.552 | 132 | 30  | 1.02E-04 |
| cg09189322 | <i>TCERG1</i>    | -5.092 | 55  | 107 | 1.02E-04 |
| cg06544198 | <i>TMEM14C</i>   | -4.203 | 57  | 105 | 1.02E-04 |
| cg14602164 | <i>FBXO8</i>     | -3.848 | 47  | 115 | 1.02E-04 |
| cg20910436 | <i>P4HA1</i>     | -3.924 | 76  | 86  | 1.03E-04 |
| cg11719283 | <i>ZNF574</i>    | 1.667  | 57  | 105 | 1.03E-04 |
| cg02298570 | <i>ZNF555</i>    | -0.529 | 139 | 23  | 1.03E-04 |
| cg07586911 | <i>NYD-SP18</i>  | 2.346  | 106 | 56  | 1.03E-04 |
| cg12287813 | <i>GCC2</i>      | -4.399 | 72  | 90  | 1.03E-04 |
| cg17399352 | <i>SPHK1</i>     | -5.417 | 59  | 103 | 1.03E-04 |
| cg20207753 | <i>C20orf72</i>  | -2.740 | 24  | 138 | 1.03E-04 |
| cg22780428 | <i>CEPT1</i>     | -3.634 | 127 | 35  | 1.03E-04 |
| cg23680936 | <i>C10orf22</i>  | -5.489 | 86  | 76  | 1.03E-04 |
| cg27121132 | <i>DERL1</i>     | -4.305 | 53  | 109 | 1.03E-04 |
| cg09391966 | <i>GIT2</i>      | -5.875 | 111 | 51  | 1.03E-04 |
| cg04556854 | <i>FLJ35630</i>  | -4.089 | 45  | 117 | 1.03E-04 |
| cg15982308 | <i>AGPAT1</i>    | -4.959 | 67  | 95  | 1.03E-04 |
| cg18763191 | <i>ST3GAL5</i>   | -4.892 | 90  | 72  | 1.03E-04 |
| cg15673110 | <i>BIRC6</i>     | -4.883 | 79  | 83  | 1.03E-04 |
| cg13044277 | <i>NRG4</i>      | -1.840 | 73  | 71  | 1.03E-04 |
| cg01065920 | <i>NDUFA12</i>   | -5.258 | 76  | 86  | 1.03E-04 |
| cg09230732 | <i>SKIV2L2</i>   | -4.639 | 63  | 99  | 1.03E-04 |
| cg12438034 | <i>MAGEF1</i>    | -2.254 | 50  | 112 | 1.03E-04 |

|            |                  |        |     |     |          |
|------------|------------------|--------|-----|-----|----------|
| cg12569173 | <i>FAM104A</i>   | -3.746 | 62  | 100 | 1.03E-04 |
| cg15411984 | <i>LRRC23</i>    | -4.979 | 114 | 48  | 1.04E-04 |
| cg15419274 | <i>DNTTIP1</i>   | -4.841 | 58  | 104 | 1.04E-04 |
| cg25922239 | <i>LEMD2</i>     | -5.348 | 39  | 123 | 1.04E-04 |
| cg14858551 | <i>ZNF133</i>    | -4.288 | 43  | 119 | 1.04E-04 |
| cg16905311 | <i>ARL5B</i>     | -4.871 | 40  | 122 | 1.04E-04 |
| cg09839960 | <i>HBII-438B</i> | 3.095  | 69  | 93  | 1.04E-04 |
| cg17765461 | <i>DAZAP1</i>    | -3.614 | 34  | 128 | 1.04E-04 |
| cg09831553 | <i>LAMA5</i>     | -4.176 | 38  | 124 | 1.04E-04 |
| cg18788872 | <i>hfl-B5</i>    | -4.919 | 64  | 98  | 1.04E-04 |
| cg22174355 | <i>GNG10</i>     | 3.437  | 86  | 76  | 1.04E-04 |
| cg10905613 | <i>GPS2</i>      | -4.320 | 110 | 52  | 1.05E-04 |
| cg01527212 | <i>TRIAD3</i>    | -5.777 | 60  | 102 | 1.05E-04 |
| cg08554462 | <i>BCL2</i>      | -3.788 | 76  | 86  | 1.05E-04 |
| cg10546523 | <i>SEMA3B</i>    | -5.955 | 98  | 64  | 1.05E-04 |
| cg11956146 | <i>CABYR</i>     | -4.628 | 59  | 103 | 1.05E-04 |
| cg13790571 | <i>ABC1</i>      | -4.653 | 86  | 76  | 1.05E-04 |
| cg20713333 | <i>RG9MTD2</i>   | -5.614 | 81  | 81  | 1.05E-04 |
| cg03792199 | <i>HIBADH</i>    | -5.127 | 107 | 55  | 1.05E-04 |
| cg22374901 | <i>TESC</i>      | -4.004 | 66  | 96  | 1.05E-04 |
| cg10448528 | <i>ZNF202</i>    | -5.488 | 67  | 95  | 1.05E-04 |
| cg20022511 | <i>G1P2</i>      | -4.566 | 57  | 105 | 1.05E-04 |
| cg15299721 | <i>LOC133308</i> | -6.574 | 98  | 64  | 1.05E-04 |
| cg16281796 | <i>PEX26</i>     | -5.000 | 102 | 60  | 1.05E-04 |
| cg24457521 | <i>ATP5E</i>     | -4.727 | 49  | 113 | 1.05E-04 |
| cg26258845 | <i>ADAM23</i>    | -5.027 | 46  | 116 | 1.05E-04 |
| cg26426223 | <i>NICN1</i>     | -4.079 | 79  | 83  | 1.05E-04 |
| cg20184165 | <i>NARG1</i>     | -6.227 | 76  | 86  | 1.05E-04 |
| cg01407797 | <i>FLJ33814</i>  | -4.054 | 111 | 51  | 1.06E-04 |
| cg19118812 | <i>ELMO1</i>     | -5.134 | 108 | 54  | 1.06E-04 |
| cg16904599 | <i>C17orf71</i>  | -4.687 | 51  | 111 | 1.06E-04 |
| cg25186211 | <i>C9orf18</i>   | -4.181 | 86  | 76  | 1.06E-04 |
| cg13906548 | <i>GABARAPL2</i> | -5.033 | 41  | 121 | 1.06E-04 |
| cg08158860 | <i>RAD51L1</i>   | -4.396 | 48  | 114 | 1.06E-04 |
| cg04322978 | <i>ETFB</i>      | -4.873 | 69  | 93  | 1.06E-04 |
| cg09305478 | <i>MGC15416</i>  | -1.434 | 63  | 99  | 1.06E-04 |
| cg00488718 | <i>MGC33302</i>  | -5.216 | 71  | 91  | 1.06E-04 |
| cg07515662 | <i>RPS26</i>     | -4.527 | 33  | 129 | 1.06E-04 |
| cg13412063 | <i>SOS1</i>      | -5.576 | 34  | 128 | 1.06E-04 |
| cg10805447 | <i>ZNF297B</i>   | -5.016 | 68  | 94  | 1.06E-04 |
| cg23940655 | <i>C14orf43</i>  | -4.870 | 47  | 115 | 1.07E-04 |
| cg27477990 | <i>C20orf31</i>  | -6.782 | 80  | 82  | 1.07E-04 |
| cg27204739 | <i>ANKRD5</i>    | -5.896 | 68  | 94  | 1.07E-04 |
| cg12042678 | <i>SUV39H2</i>   | -5.756 | 101 | 61  | 1.07E-04 |
| cg15993402 | <i>C16orf55</i>  | -5.495 | 58  | 104 | 1.07E-04 |
| cg20282199 | <i>SEC13L1</i>   | -3.043 | 65  | 97  | 1.07E-04 |
| cg23881971 | <i>ZNF10</i>     | -3.531 | 72  | 90  | 1.07E-04 |
| cg05852416 | <i>NFKBIA</i>    | -5.602 | 57  | 105 | 1.07E-04 |
| cg24300924 | <i>C18orf43</i>  | -5.042 | 58  | 104 | 1.07E-04 |
| cg24525573 | <i>C1orf64</i>   | 2.461  | 100 | 62  | 1.07E-04 |
| cg07440387 | <i>SFRS6</i>     | -4.802 | 70  | 92  | 1.07E-04 |
| cg13243219 | <i>MDS1</i>      | -4.462 | 65  | 97  | 1.07E-04 |
| cg15881727 | <i>ZBED4</i>     | -4.246 | 115 | 47  | 1.07E-04 |
| cg01809579 | <i>HNRPK</i>     | -4.618 | 70  | 92  | 1.08E-04 |
| cg08722720 | <i>AVEN</i>      | -4.289 | 91  | 71  | 1.08E-04 |

|            |                  |        |     |     |          |
|------------|------------------|--------|-----|-----|----------|
| cg10640379 | <i>LARP2</i>     | -4.897 | 67  | 95  | 1.08E-04 |
| cg22635155 | <i>PDE2A</i>     | -4.016 | 93  | 69  | 1.08E-04 |
| cg09462587 | <i>MGC11102</i>  | -4.817 | 96  | 66  | 1.08E-04 |
| cg12609467 | <i>DAG1</i>      | -4.145 | 88  | 74  | 1.08E-04 |
| cg17449882 | <i>C8orf46</i>   | 1.852  | 85  | 77  | 1.08E-04 |
| cg26309134 | <i>ZNF542</i>    | -4.615 | 86  | 76  | 1.08E-04 |
| cg00308133 | <i>GAMT</i>      | -5.731 | 73  | 89  | 1.08E-04 |
| cg10398950 | <i>CRKRS</i>     | -4.692 | 72  | 90  | 1.08E-04 |
| cg06121469 | <i>KIAA1840</i>  | -4.126 | 82  | 80  | 1.08E-04 |
| cg16360444 | <i>ITGA7</i>     | -3.617 | 55  | 107 | 1.08E-04 |
| cg15113803 | <i>RHO</i>       | 2.700  | 68  | 94  | 1.08E-04 |
| cg06479426 | <i>SLCO4A1</i>   | -5.220 | 69  | 93  | 1.09E-04 |
| cg19819891 | <i>MYST1</i>     | -5.611 | 56  | 106 | 1.09E-04 |
| cg14884741 | <i>PPP1R14C</i>  | -3.024 | 62  | 100 | 1.09E-04 |
| cg11780934 | <i>ANKRD13B</i>  | -4.807 | 48  | 114 | 1.09E-04 |
| cg09564133 | <i>MXD3</i>      | -3.772 | 51  | 111 | 1.09E-04 |
| cg04722168 | <i>PAFAH2</i>    | -5.040 | 61  | 101 | 1.09E-04 |
| cg14892066 | <i>DCTD</i>      | -4.974 | 76  | 86  | 1.09E-04 |
| cg01956781 | <i>KIAA1838</i>  | -6.927 | 52  | 110 | 1.09E-04 |
| cg21545849 | <i>CHD6</i>      | -5.631 | 84  | 78  | 1.09E-04 |
| cg23513690 | <i>SH3RF2</i>    | -5.590 | 59  | 103 | 1.09E-04 |
| cg17950095 | <i>HOXA11</i>    | -1.319 | 89  | 73  | 1.09E-04 |
| cg27242945 | <i>CAV1</i>      | -4.771 | 86  | 76  | 1.10E-04 |
| cg13176285 | <i>C13orf8</i>   | -4.697 | 36  | 126 | 1.10E-04 |
| cg23163471 | <i>SVIL</i>      | -5.695 | 63  | 99  | 1.10E-04 |
| cg09155001 | <i>FAM26C</i>    | 2.792  | 56  | 106 | 1.10E-04 |
| cg14698961 | <i>LOC129285</i> | -5.149 | 63  | 99  | 1.10E-04 |
| cg20368979 | <i>FLJ38991</i>  | -4.092 | 113 | 49  | 1.10E-04 |
| cg16927136 | <i>RPL35A</i>    | -5.145 | 91  | 71  | 1.10E-04 |
| cg05069385 | <i>FKBPL</i>     | -5.246 | 78  | 84  | 1.10E-04 |
| cg06808983 | <i>G6PC3</i>     | -5.241 | 55  | 107 | 1.10E-04 |
| cg19221044 | <i>TAP2</i>      | -4.393 | 99  | 63  | 1.10E-04 |
| cg22419075 | <i>DPP7</i>      | -5.386 | 61  | 101 | 1.10E-04 |
| cg25593040 | <i>DDX18</i>     | -4.981 | 49  | 113 | 1.10E-04 |
| cg12629083 | <i>SEN1</i>      | -5.309 | 46  | 116 | 1.10E-04 |
| cg14203758 | <i>ASF1B</i>     | -4.609 | 60  | 102 | 1.11E-04 |
| cg14903309 | <i>TARBP2</i>    | -4.838 | 63  | 99  | 1.11E-04 |
| cg00831028 | <i>C20orf43</i>  | -4.274 | 78  | 84  | 1.11E-04 |
| cg17391474 | <i>BRP44L</i>    | -5.541 | 97  | 65  | 1.11E-04 |
| cg22800191 | <i>HPS3</i>      | -5.373 | 116 | 46  | 1.11E-04 |
| cg23513644 | <i>MPHOSPH10</i> | -6.691 | 94  | 68  | 1.11E-04 |
| cg10957584 | <i>FAM86A</i>    | -5.227 | 75  | 87  | 1.11E-04 |
| cg06291334 | <i>SPOP</i>      | -3.369 | 97  | 65  | 1.11E-04 |
| cg10705951 | <i>TAOK2</i>     | -5.447 | 40  | 122 | 1.11E-04 |
| cg23681213 | <i>PNMA1</i>     | -3.589 | 99  | 63  | 1.11E-04 |
| cg18152830 | <i>TNFRSF13B</i> | 2.840  | 65  | 97  | 1.12E-04 |
| cg17843759 | <i>ELL</i>       | -4.796 | 29  | 133 | 1.12E-04 |
| cg19782075 | <i>LOC144233</i> | -3.478 | 45  | 117 | 1.12E-04 |
| cg14085328 | <i>DDX59</i>     | -4.139 | 95  | 67  | 1.12E-04 |
| cg19220754 | <i>TNPO1</i>     | -5.534 | 63  | 99  | 1.12E-04 |
| cg15558971 | <i>ZFP36L1</i>   | -5.101 | 68  | 94  | 1.12E-04 |
| cg23709121 | <i>C14orf149</i> | -5.589 | 87  | 75  | 1.12E-04 |
| cg04464559 | <i>PDSS2</i>     | -5.551 | 101 | 61  | 1.13E-04 |
| cg27207274 | <i>MYC</i>       | -4.679 | 54  | 108 | 1.13E-04 |
| cg25885771 | <i>HIST1H2AK</i> | -4.302 | 78  | 84  | 1.13E-04 |

|            |          |        |     |     |          |
|------------|----------|--------|-----|-----|----------|
| cg02901159 | CLNS1A   | -5.592 | 65  | 97  | 1.13E-04 |
| cg07016325 | PAPOLA   | -6.513 | 83  | 79  | 1.13E-04 |
| cg19624775 | MORC3    | -5.959 | 92  | 70  | 1.13E-04 |
| cg16286776 | EIF2C2   | -5.824 | 87  | 75  | 1.13E-04 |
| cg26643856 | HLA-DOA  | -4.416 | 75  | 87  | 1.13E-04 |
| cg19763279 | HPSE     | -4.522 | 91  | 71  | 1.14E-04 |
| cg24473385 | ZNHIT3   | -5.912 | 54  | 108 | 1.14E-04 |
| cg05236037 | ZNF202   | -4.927 | 57  | 105 | 1.14E-04 |
| cg01944444 | TUBB     | -4.680 | 65  | 97  | 1.14E-04 |
| cg17536848 | LMBR1    | -3.178 | 86  | 76  | 1.14E-04 |
| cg12269343 | SEL1L    | -4.616 | 55  | 107 | 1.14E-04 |
| cg11951066 | FLJ14768 | 3.111  | 109 | 53  | 1.14E-04 |
| cg04531254 | MGC17839 | -3.583 | 91  | 71  | 1.14E-04 |
| cg07103819 | DGAT1    | -5.733 | 64  | 98  | 1.14E-04 |
| cg12533335 | TAF1C    | -4.019 | 40  | 122 | 1.14E-04 |
| cg06641503 | ARIH2    | 1.530  | 51  | 111 | 1.14E-04 |
| cg25136310 | RPL36    | -4.416 | 106 | 56  | 1.14E-04 |
| cg11452360 | C1orf93  | -4.133 | 98  | 64  | 1.14E-04 |
| cg20451802 | SEC8L1   | -4.705 | 92  | 70  | 1.14E-04 |
| cg16909364 | THAP2    | -4.896 | 56  | 106 | 1.15E-04 |
| cg08179907 | RAB39    | -3.220 | 57  | 105 | 1.15E-04 |
| cg13765303 | BOC      | -3.463 | 8   | 154 | 1.15E-04 |
| cg05287690 | FBXW7    | -2.614 | 95  | 67  | 1.15E-04 |
| cg13976366 | TRIM21   | -5.089 | 77  | 85  | 1.15E-04 |
| cg00327483 | CASQ1    | 3.893  | 80  | 82  | 1.15E-04 |
| cg01639256 | FLJ25084 | 3.423  | 65  | 97  | 1.15E-04 |
| cg04737319 | HARS2    | -4.869 | 87  | 75  | 1.15E-04 |
| cg08705994 | RUNX3    | 4.864  | 57  | 105 | 1.15E-04 |
| cg10158080 | SOX5     | -4.911 | 63  | 99  | 1.15E-04 |
| cg13218906 | PCMTD2   | -4.879 | 80  | 82  | 1.15E-04 |
| cg27472032 | VPS39    | -4.489 | 52  | 110 | 1.15E-04 |
| cg03403539 | NUPL2    | -5.473 | 85  | 77  | 1.15E-04 |
| cg10049968 | C9orf25  | -4.984 | 87  | 75  | 1.15E-04 |
| cg24371225 | MGC42105 | -5.843 | 61  | 101 | 1.15E-04 |
| cg12787624 | LIMA1    | -6.219 | 84  | 78  | 1.15E-04 |
| cg23434919 | STK10    | -5.523 | 59  | 103 | 1.15E-04 |
| cg16770799 | ITGA5    | -4.063 | 49  | 113 | 1.15E-04 |
| cg04780126 | POLA2    | -4.681 | 75  | 87  | 1.15E-04 |
| cg03197524 | TNIP1    | -4.411 | 69  | 93  | 1.16E-04 |
| cg14102807 | CD19     | 1.460  | 47  | 115 | 1.16E-04 |
| cg07872652 | CNIH2    | -3.993 | 114 | 48  | 1.16E-04 |
| cg24611631 | SLC1A1   | -5.110 | 61  | 101 | 1.16E-04 |
| cg01284306 | C21orf91 | -3.753 | 87  | 75  | 1.16E-04 |
| cg04249586 | ELOVL6   | -3.856 | 42  | 120 | 1.16E-04 |
| cg26875522 | ZNF307   | -4.814 | 31  | 131 | 1.16E-04 |
| cg05680424 | BPGM     | -4.024 | 90  | 72  | 1.16E-04 |
| cg07740989 | EEF1A1   | -4.441 | 110 | 52  | 1.16E-04 |
| cg09303043 | ALDH3A2  | -6.045 | 69  | 93  | 1.16E-04 |
| cg10823546 | MAK10    | -5.490 | 116 | 46  | 1.16E-04 |
| cg22197787 | KCNH1    | -5.230 | 90  | 72  | 1.17E-04 |
| cg05032550 | C14orf2  | -5.995 | 40  | 122 | 1.17E-04 |
| cg11665588 | SESN3    | -4.079 | 96  | 66  | 1.17E-04 |
| cg12256228 | RING1    | -4.889 | 58  | 104 | 1.17E-04 |
| cg22510943 | LMNB2    | -2.809 | 76  | 86  | 1.17E-04 |
| cg01493303 | GRWD1    | -5.231 | 58  | 104 | 1.17E-04 |

|            |           |        |     |     |          |
|------------|-----------|--------|-----|-----|----------|
| cg04228553 | CAPN7     | -6.176 | 64  | 98  | 1.17E-04 |
| cg04262565 | DUSP7     | -5.238 | 116 | 46  | 1.17E-04 |
| cg07656391 | LOC84661  | -4.022 | 57  | 105 | 1.17E-04 |
| cg07955356 | DNASE2    | -4.201 | 121 | 41  | 1.17E-04 |
| cg03989569 | MEF2D     | -5.623 | 80  | 82  | 1.17E-04 |
| cg09537031 | SH2D4A    | -4.758 | 82  | 80  | 1.18E-04 |
| cg26315493 | VCP       | -4.436 | 82  | 80  | 1.18E-04 |
| cg16315923 | KIAA0195  | -4.550 | 64  | 98  | 1.18E-04 |
| cg02847216 | CTAGE1    | 2.676  | 81  | 81  | 1.18E-04 |
| cg14230685 | SPIN      | -4.103 | 50  | 112 | 1.18E-04 |
| cg00825031 | VPS37A    | -5.802 | 50  | 112 | 1.18E-04 |
| cg16034046 | KIAA0182  | -5.984 | 80  | 82  | 1.18E-04 |
| cg26762198 | C16orf9   | -5.247 | 48  | 114 | 1.18E-04 |
| cg03455458 | FLJ12505  | -4.167 | 82  | 80  | 1.19E-04 |
| cg22640452 | NR1D1     | -5.730 | 81  | 81  | 1.19E-04 |
| cg04402021 | POLR2E    | -5.379 | 62  | 100 | 1.19E-04 |
| cg02764611 | MGC19604  | -5.420 | 77  | 85  | 1.19E-04 |
| cg19734148 | RAE1      | -5.275 | 50  | 112 | 1.19E-04 |
| cg09398185 | IFIT2     | -4.247 | 71  | 91  | 1.19E-04 |
| cg12727374 | MAP6D1    | -5.866 | 69  | 93  | 1.19E-04 |
| cg11655418 | RPS10     | -4.720 | 74  | 88  | 1.19E-04 |
| cg03126490 | SPATA13   | -5.519 | 43  | 119 | 1.19E-04 |
| cg09185773 | WASF3     | -3.456 | 46  | 116 | 1.19E-04 |
| cg23246978 | GPC6      | -4.118 | 44  | 118 | 1.19E-04 |
| cg24883276 | PSAP      | -5.902 | 43  | 119 | 1.19E-04 |
| cg17682309 | STX7      | -4.949 | 40  | 122 | 1.19E-04 |
| cg21235838 | SORBS1    | -5.562 | 48  | 114 | 1.19E-04 |
| cg25053891 | TRIAP1    | -4.413 | 77  | 85  | 1.19E-04 |
| cg25834275 | NFIC      | -5.945 | 40  | 122 | 1.19E-04 |
| cg21489873 | C9orf45   | 2.574  | 69  | 93  | 1.19E-04 |
| cg08690721 | C11orf17  | -4.633 | 68  | 94  | 1.20E-04 |
| cg26916927 | GLO1      | -4.737 | 38  | 124 | 1.20E-04 |
| cg07115304 | TRIB3     | -3.900 | 43  | 119 | 1.20E-04 |
| cg01940974 | MTAP      | -5.345 | 75  | 87  | 1.20E-04 |
| cg27274028 | WDR37     | -5.688 | 67  | 95  | 1.20E-04 |
| cg02056135 | SP110     | -5.060 | 91  | 71  | 1.20E-04 |
| cg19932177 | RFC3      | -4.548 | 70  | 92  | 1.20E-04 |
| cg06898923 | RAB18     | -3.913 | 93  | 69  | 1.20E-04 |
| cg01214321 | DPYSL2    | -5.917 | 66  | 96  | 1.20E-04 |
| cg26183662 | NFAT5     | -3.822 | 110 | 52  | 1.21E-04 |
| cg04548378 | CDKN1C    | -3.419 | 60  | 102 | 1.21E-04 |
| cg23424268 | GCHFR     | -5.386 | 78  | 84  | 1.21E-04 |
| cg02102644 | AP1GBP1   | -5.032 | 52  | 110 | 1.21E-04 |
| cg24719575 | REST      | -4.076 | 51  | 111 | 1.21E-04 |
| cg13864937 | FAM111B   | -4.833 | 99  | 63  | 1.21E-04 |
| cg05380570 | ARHGEF10L | -4.224 | 103 | 59  | 1.21E-04 |
| cg16698781 | UBE2G2    | -5.823 | 42  | 120 | 1.21E-04 |
| cg07122126 | ZNF8      | -5.263 | 61  | 101 | 1.21E-04 |
| cg00720137 | DYNLRB2   | -5.397 | 82  | 80  | 1.22E-04 |
| cg02855426 | CPA5      | 0.075  | 91  | 71  | 1.22E-04 |
| cg14961550 | MCM3      | -3.794 | 110 | 52  | 1.22E-04 |
| cg02493771 | KRTAP13-2 | -1.223 | 71  | 91  | 1.22E-04 |
| cg16155382 | GRHL3     | -3.219 | 70  | 92  | 1.22E-04 |
| cg17111669 | NCOA5     | -3.971 | 60  | 102 | 1.22E-04 |
| cg13118748 | C6orf136  | -4.842 | 65  | 97  | 1.22E-04 |

|            |                  |        |     |     |          |
|------------|------------------|--------|-----|-----|----------|
| cg05432118 | <i>PRKAB1</i>    | -4.507 | 78  | 84  | 1.22E-04 |
| cg08465862 | <i>PFKP</i>      | -4.466 | 43  | 119 | 1.22E-04 |
| cg11116142 | <i>CRBN</i>      | -5.566 | 46  | 116 | 1.22E-04 |
| cg27083787 | <i>IL1A</i>      | 3.315  | 52  | 110 | 1.22E-04 |
| cg03990551 | <i>BBS7</i>      | -5.477 | 52  | 110 | 1.22E-04 |
| cg21838233 | <i>TPX2</i>      | -4.942 | 33  | 129 | 1.22E-04 |
| cg08351143 | <i>UBE2R2</i>    | -5.316 | 80  | 82  | 1.22E-04 |
| cg25232934 | <i>THEX1</i>     | -4.185 | 71  | 91  | 1.22E-04 |
| cg12588476 | <i>ZNF38</i>     | -4.844 | 108 | 54  | 1.23E-04 |
| cg00870662 | <i>PARD6G</i>    | -4.220 | 66  | 96  | 1.23E-04 |
| cg21142158 | <i>COG6</i>      | -3.510 | 62  | 100 | 1.23E-04 |
| cg13510262 | <i>SP1</i>       | -3.259 | 77  | 85  | 1.23E-04 |
| cg24364574 | <i>PREX1</i>     | -2.932 | 91  | 71  | 1.23E-04 |
| cg24196046 | <i>EIF2C3</i>    | -3.765 | 99  | 63  | 1.23E-04 |
| cg12680071 | <i>COX6B1</i>    | -4.712 | 104 | 58  | 1.23E-04 |
| cg06048156 | <i>ITGB3</i>     | -5.602 | 55  | 107 | 1.23E-04 |
| cg11269533 | <i>FEV</i>       | -3.216 | 80  | 82  | 1.23E-04 |
| cg14116596 | <i>TBXAS1</i>    | 1.131  | 115 | 46  | 1.23E-04 |
| cg15739944 | <i>HABP4</i>     | -4.872 | 96  | 66  | 1.23E-04 |
| cg26165608 | <i>FARS2</i>     | -5.650 | 64  | 98  | 1.23E-04 |
| cg01288598 | <i>CD83</i>      | -3.538 | 88  | 74  | 1.23E-04 |
| cg07824742 | <i>DBH</i>       | 5.949  | 87  | 75  | 1.23E-04 |
| cg15288179 | <i>SUB1</i>      | -6.178 | 63  | 99  | 1.23E-04 |
| cg08729012 | <i>CMTM6</i>     | -3.407 | 52  | 110 | 1.24E-04 |
| cg20264731 | <i>POLB</i>      | -4.805 | 96  | 66  | 1.24E-04 |
| cg13838528 | <i>RPL27A</i>    | -5.757 | 102 | 60  | 1.24E-04 |
| cg04826422 | <i>LOC129285</i> | -5.248 | 79  | 83  | 1.24E-04 |
| cg00420715 | <i>VPS13B</i>    | -5.765 | 92  | 70  | 1.24E-04 |
| cg11056832 | <i>PKN3</i>      | -4.886 | 68  | 94  | 1.24E-04 |
| cg17154022 | <i>HMGN2</i>     | -4.046 | 32  | 130 | 1.24E-04 |
| cg09845946 | <i>ABI2</i>      | -5.388 | 79  | 83  | 1.24E-04 |
| cg02259997 | <i>FGF9</i>      | -4.194 | 45  | 117 | 1.24E-04 |
| cg04660617 | <i>RABL2B</i>    | -4.930 | 57  | 105 | 1.24E-04 |
| cg08466883 | <i>KCTD3</i>     | -4.188 | 93  | 69  | 1.24E-04 |
| cg08550026 | <i>NAV2</i>      | -4.115 | 70  | 92  | 1.24E-04 |
| cg05249393 | <i>LDLR</i>      | -4.193 | 65  | 97  | 1.24E-04 |
| cg12081743 | <i>HDAC9</i>     | -2.966 | 94  | 68  | 1.24E-04 |
| cg12592463 | <i>C1orf63</i>   | -4.874 | 93  | 69  | 1.25E-04 |
| cg06508934 | <i>TIMP2</i>     | -5.175 | 95  | 67  | 1.25E-04 |
| cg16657615 | <i>TNFRSF12A</i> | -4.299 | 112 | 50  | 1.25E-04 |
| cg19668255 | <i>LOC81558</i>  | -4.686 | 110 | 52  | 1.25E-04 |
| cg20206574 | <i>DSCR1</i>     | -4.162 | 120 | 42  | 1.25E-04 |
| cg24987170 | <i>ADCK1</i>     | -4.345 | 100 | 62  | 1.25E-04 |
| cg27241190 | <i>RND1</i>      | -4.514 | 96  | 66  | 1.25E-04 |
| cg03993463 | <i>KCNJ15</i>    | 2.528  | 74  | 88  | 1.25E-04 |
| cg19875047 | <i>ANKRD42</i>   | -5.022 | 50  | 112 | 1.25E-04 |
| cg03491181 | <i>FKBP3</i>     | -4.367 | 44  | 118 | 1.25E-04 |
| cg05232067 | <i>BNIP3L</i>    | -4.164 | 75  | 87  | 1.26E-04 |
| cg01171588 | <i>USP38</i>     | -5.908 | 67  | 95  | 1.26E-04 |
| cg04785227 | <i>CHRNA7</i>    | -4.596 | 75  | 87  | 1.26E-04 |
| cg21700166 | <i>GPR68</i>     | -2.942 | 64  | 98  | 1.27E-04 |
| cg21295602 | <i>PSMB6</i>     | -5.611 | 87  | 75  | 1.27E-04 |
| cg10688941 | <i>ASCC3L1</i>   | -4.623 | 45  | 117 | 1.27E-04 |
| cg01572266 | <i>PTPRG</i>     | -4.519 | 61  | 101 | 1.27E-04 |
| cg15945769 | <i>HHAT</i>      | -4.808 | 61  | 101 | 1.27E-04 |

|            |                   |        |     |     |          |
|------------|-------------------|--------|-----|-----|----------|
| cg27293353 | <i>PRIM2A</i>     | -5.688 | 54  | 108 | 1.27E-04 |
| cg18129786 | <i>ZNF445</i>     | 3.520  | 31  | 131 | 1.27E-04 |
| cg23392730 | <i>CHCHD1</i>     | -2.750 | 43  | 119 | 1.27E-04 |
| cg01246405 | <i>STIM1</i>      | -2.486 | 85  | 77  | 1.28E-04 |
| cg25352650 | <i>RRS1</i>       | -4.504 | 64  | 98  | 1.28E-04 |
| cg27489994 | <i>TPT1</i>       | -3.677 | 88  | 74  | 1.28E-04 |
| cg19203504 | <i>RPE</i>        | -2.377 | 73  | 89  | 1.28E-04 |
| cg16332060 | <i>FLJ21827</i>   | -4.285 | 63  | 99  | 1.28E-04 |
| cg02246968 | <i>PHGDHL1</i>    | -5.307 | 54  | 108 | 1.28E-04 |
| cg16743781 | <i>RHOC</i>       | -5.684 | 77  | 85  | 1.28E-04 |
| cg18692596 | <i>LOC58486</i>   | -4.017 | 92  | 70  | 1.28E-04 |
| cg21523528 | <i>CBFA2T2</i>    | -5.106 | 55  | 107 | 1.28E-04 |
| cg06528936 | <i>GNL2</i>       | -5.785 | 103 | 59  | 1.28E-04 |
| cg09622957 | <i>TSRC1</i>      | -3.974 | 55  | 107 | 1.28E-04 |
| cg02400248 | <i>CDKN2B</i>     | -5.856 | 89  | 73  | 1.28E-04 |
| cg21289924 | <i>EIF3S10</i>    | -6.104 | 93  | 69  | 1.28E-04 |
| cg15836394 | <i>FDFT1</i>      | -5.160 | 97  | 65  | 1.28E-04 |
| cg21544377 | <i>C12orf61</i>   | -5.743 | 73  | 89  | 1.29E-04 |
| cg01269795 | <i>BTN3A3</i>     | -1.567 | 73  | 89  | 1.29E-04 |
| cg06975499 | <i>EZH1</i>       | -4.085 | 42  | 120 | 1.29E-04 |
| cg22805517 | <i>C7orf25</i>    | -4.594 | 74  | 88  | 1.29E-04 |
| cg25416363 | <i>RBM15</i>      | -4.628 | 87  | 75  | 1.29E-04 |
| cg04280758 | <i>MAML2</i>      | -5.490 | 45  | 117 | 1.29E-04 |
| cg09558502 | <i>OVGP1</i>      | -1.500 | 110 | 52  | 1.29E-04 |
| cg13846796 | <i>LSM14A</i>     | -5.272 | 63  | 99  | 1.29E-04 |
| cg10220156 | <i>KIF13B</i>     | -5.024 | 110 | 52  | 1.30E-04 |
| cg16276070 | <i>ZNF550</i>     | -5.590 | 85  | 77  | 1.30E-04 |
| cg24928378 | <i>RND1</i>       | -3.727 | 102 | 60  | 1.30E-04 |
| cg26107778 | <i>KIAA1407</i>   | -5.271 | 113 | 49  | 1.30E-04 |
| cg13060646 | <i>ADFP</i>       | -5.681 | 84  | 78  | 1.30E-04 |
| cg10774155 | <i>VKORC1L1</i>   | -6.393 | 100 | 62  | 1.30E-04 |
| cg13588645 | <i>R3HDM1</i>     | -5.809 | 82  | 80  | 1.30E-04 |
| cg05475028 | <i>FAM44A</i>     | -5.085 | 72  | 90  | 1.30E-04 |
| cg04951204 | <i>PPP1R9A</i>    | -3.930 | 85  | 77  | 1.31E-04 |
| cg06269001 | <i>ENTPD6</i>     | -6.593 | 90  | 72  | 1.31E-04 |
| cg00033773 | <i>MORG1</i>      | 2.213  | 107 | 55  | 1.31E-04 |
| cg00720723 | <i>NOP5/NOP58</i> | -4.202 | 38  | 124 | 1.31E-04 |
| cg23239052 | <i>BAIAP2</i>     | -5.344 | 56  | 106 | 1.31E-04 |
| cg16917279 | <i>MRS2L</i>      | -5.172 | 64  | 98  | 1.31E-04 |
| cg09729918 | <i>SLC25A25</i>   | -4.871 | 46  | 116 | 1.31E-04 |
| cg25500285 | <i>EIF4EBP1</i>   | -4.426 | 41  | 121 | 1.31E-04 |
| cg26778754 | <i>SSFA2</i>      | -4.619 | 34  | 128 | 1.31E-04 |
| cg13393195 | <i>IQCD</i>       | -4.910 | 73  | 89  | 1.31E-04 |
| cg17718210 | <i>MESDC1</i>     | -5.536 | 59  | 103 | 1.31E-04 |
| cg16148403 | <i>SLALP</i>      | -5.326 | 61  | 101 | 1.31E-04 |
| cg00563229 | <i>XKR8</i>       | -5.533 | 85  | 77  | 1.31E-04 |
| cg01630869 | <i>CDC42EP2</i>   | -5.198 | 84  | 78  | 1.31E-04 |
| cg08001895 | <i>EPHA7</i>      | -4.808 | 101 | 61  | 1.31E-04 |
| cg10935064 | <i>SYCP3</i>      | 5.307  | 84  | 78  | 1.31E-04 |
| cg18627459 | <i>RFC5</i>       | -5.662 | 97  | 65  | 1.31E-04 |
| cg25791888 | <i>HSF2BP</i>     | -4.293 | 79  | 83  | 1.31E-04 |
| cg18801806 | <i>DLNB14</i>     | -3.070 | 76  | 86  | 1.32E-04 |
| cg22655224 | <i>MT3</i>        | -5.378 | 85  | 77  | 1.32E-04 |
| cg24868525 | <i>TMEM1</i>      | -3.023 | 100 | 62  | 1.32E-04 |
| cg27519424 | <i>HLCS</i>       | -3.890 | 112 | 50  | 1.32E-04 |

|            |                 |        |     |     |          |
|------------|-----------------|--------|-----|-----|----------|
| cg05417985 | <i>ENPP1</i>    | -5.956 | 77  | 85  | 1.32E-04 |
| cg00901704 | <i>SLC25A19</i> | -4.218 | 64  | 98  | 1.32E-04 |
| cg21759080 | <i>STX5A</i>    | -5.459 | 53  | 109 | 1.32E-04 |
| cg23587449 | <i>LRAT</i>     | -3.154 | 74  | 88  | 1.32E-04 |
| cg21510697 | <i>USP31</i>    | -4.855 | 78  | 84  | 1.33E-04 |
| cg16328273 | <i>CCNE2</i>    | -6.235 | 81  | 81  | 1.33E-04 |
| cg20770803 | <i>CNTD</i>     | -4.996 | 71  | 91  | 1.33E-04 |
| cg23521281 | <i>WDR75</i>    | -5.747 | 49  | 113 | 1.33E-04 |
| cg04209631 | <i>C11orf54</i> | -5.208 | 47  | 115 | 1.33E-04 |
| cg08229694 | <i>IMMT</i>     | -5.866 | 68  | 94  | 1.33E-04 |
| cg23727043 | <i>ADAMTS7</i>  | -3.282 | 98  | 64  | 1.33E-04 |
| cg10043101 | <i>ATP1B2</i>   | -5.227 | 50  | 112 | 1.33E-04 |
| cg26097271 | <i>MED6</i>     | -4.595 | 73  | 89  | 1.33E-04 |
| cg18333807 | <i>GSK3A</i>    | -4.754 | 104 | 58  | 1.33E-04 |
| cg04883450 | <i>HSA9761</i>  | -4.180 | 54  | 108 | 1.33E-04 |
| cg07177755 | <i>ERCC5</i>    | -5.093 | 56  | 106 | 1.33E-04 |
| cg05911610 | <i>MRPL3</i>    | -5.808 | 51  | 111 | 1.33E-04 |
| cg08177017 | <i>C10orf6</i>  | -4.170 | 92  | 70  | 1.33E-04 |
| cg12246527 | <i>MAP2K5</i>   | -4.981 | 107 | 55  | 1.33E-04 |
| cg26267341 | <i>BIRC5</i>    | -5.089 | 58  | 104 | 1.33E-04 |
| cg24715106 | <i>AQP11</i>    | -5.337 | 69  | 93  | 1.33E-04 |
| cg21750545 | <i>DCUN1D4</i>  | -5.683 | 49  | 113 | 1.34E-04 |
| cg05120715 | <i>UGCG</i>     | -4.425 | 91  | 71  | 1.34E-04 |
| cg00155609 | <i>PRDX2</i>    | -4.688 | 48  | 114 | 1.34E-04 |
| cg15383392 | <i>CTTN</i>     | -4.391 | 136 | 26  | 1.34E-04 |
| cg05650565 | <i>UBXD2</i>    | -5.712 | 78  | 84  | 1.34E-04 |
| cg08887137 | <i>DCTN6</i>    | -5.203 | 44  | 118 | 1.34E-04 |
| cg05825950 | <i>CR1</i>      | -2.923 | 80  | 82  | 1.34E-04 |
| cg18399321 | <i>MGAT3</i>    | -4.962 | 48  | 114 | 1.34E-04 |
| cg23644127 | <i>C8orf38</i>  | -3.950 | 49  | 113 | 1.34E-04 |
| cg01858173 | <i>ROM1</i>     | -4.167 | 80  | 82  | 1.34E-04 |
| cg22978941 | <i>UNG</i>      | -5.838 | 83  | 79  | 1.34E-04 |
| cg06191203 | <i>RIF1</i>     | -5.455 | 74  | 88  | 1.34E-04 |
| cg20319405 | <i>EIF4G2</i>   | -5.754 | 90  | 72  | 1.34E-04 |
| cg04683119 | <i>GUF1</i>     | -4.343 | 74  | 88  | 1.34E-04 |
| cg06189265 | <i>ZBTB37</i>   | -4.325 | 110 | 52  | 1.34E-04 |
| cg13861644 | <i>PIWIL1</i>   | 2.236  | 29  | 133 | 1.34E-04 |
| cg12154803 | <i>CCDC34</i>   | -5.183 | 69  | 93  | 1.35E-04 |
| cg20702327 | <i>CSNK2A1</i>  | -4.456 | 57  | 105 | 1.35E-04 |
| cg18521925 | <i>SLC22A16</i> | 3.300  | 121 | 41  | 1.35E-04 |
| cg25568243 | <i>C1orf176</i> | -5.522 | 46  | 116 | 1.35E-04 |
| cg10968649 | <i>JMJD2A</i>   | -5.993 | 85  | 77  | 1.35E-04 |
| cg22843446 | <i>ASAM</i>     | -4.654 | 86  | 76  | 1.35E-04 |
| cg14729071 | <i>RAD21</i>    | -3.659 | 60  | 102 | 1.36E-04 |
| cg01892528 | <i>TTLL1</i>    | -5.013 | 59  | 103 | 1.36E-04 |
| cg02723533 | <i>CCND1</i>    | 5.403  | 98  | 64  | 1.36E-04 |
| cg06862062 | <i>ACOX3</i>    | -5.445 | 54  | 108 | 1.36E-04 |
| cg13653456 | <i>VARS</i>     | -4.355 | 115 | 47  | 1.36E-04 |
| cg11225935 | <i>JARID1A</i>  | -5.239 | 79  | 83  | 1.36E-04 |
| cg14911472 | <i>CRSP3</i>    | -4.577 | 72  | 90  | 1.36E-04 |
| cg03592161 | <i>C17orf48</i> | -6.061 | 50  | 112 | 1.36E-04 |
| cg09276355 | <i>C13orf1</i>  | -5.249 | 79  | 83  | 1.36E-04 |
| cg18081750 | <i>DUSP6</i>    | -5.126 | 107 | 55  | 1.36E-04 |
| cg12995941 | <i>INSRR</i>    | -1.871 | 80  | 82  | 1.36E-04 |
| cg16878652 | <i>GPS1</i>     | -5.317 | 38  | 124 | 1.37E-04 |

|            |                  |        |     |     |          |
|------------|------------------|--------|-----|-----|----------|
| cg25516544 | <i>DEPDC4</i>    | -5.933 | 56  | 106 | 1.37E-04 |
| cg20972543 | <i>HERC3</i>     | -5.306 | 46  | 116 | 1.37E-04 |
| cg14047244 | <i>LMNB2</i>     | -5.031 | 90  | 72  | 1.37E-04 |
| cg00636639 | <i>MRRF</i>      | -4.934 | 91  | 71  | 1.37E-04 |
| cg03799530 | <i>LNK</i>       | -4.036 | 92  | 70  | 1.37E-04 |
| cg06259570 | <i>MMP27</i>     | 1.608  | 79  | 83  | 1.37E-04 |
| cg06188683 | <i>ANP32A</i>    | -5.715 | 54  | 108 | 1.37E-04 |
| cg16802152 | <i>CARF</i>      | -4.486 | 40  | 122 | 1.37E-04 |
| cg18654873 | <i>MAP3K7</i>    | -6.087 | 60  | 102 | 1.37E-04 |
| cg01838317 | <i>GCH1</i>      | -4.880 | 72  | 90  | 1.37E-04 |
| cg22992570 | <i>PHCA</i>      | -5.421 | 81  | 81  | 1.37E-04 |
| cg18495298 | <i>FADS3</i>     | -3.910 | 80  | 82  | 1.38E-04 |
| cg15864184 | <i>PTPN1</i>     | -2.433 | 63  | 99  | 1.38E-04 |
| cg17171916 | <i>ZNF263</i>    | -5.418 | 57  | 105 | 1.38E-04 |
| cg24727568 | <i>PCBP1</i>     | -4.640 | 57  | 105 | 1.38E-04 |
| cg09518735 | <i>C10orf119</i> | -5.860 | 82  | 80  | 1.38E-04 |
| cg18220560 | <i>SMC6L1</i>    | -2.483 | 39  | 123 | 1.38E-04 |
| cg10103111 | <i>OPA3</i>      | -4.606 | 96  | 66  | 1.38E-04 |
| cg19649173 | <i>ZNF446</i>    | -4.440 | 72  | 90  | 1.38E-04 |
| cg22432269 | <i>CYFIP1</i>    | -5.762 | 45  | 117 | 1.38E-04 |
| cg24352736 | <i>YIPF2</i>     | -5.639 | 99  | 63  | 1.38E-04 |
| cg26540127 | <i>ACTR3</i>     | -4.713 | 80  | 82  | 1.38E-04 |
| cg25251635 | <i>POP7</i>      | -4.853 | 88  | 74  | 1.38E-04 |
| cg20701850 | <i>RECQL</i>     | -5.009 | 78  | 84  | 1.38E-04 |
| cg06786424 | <i>PRPF4B</i>    | -5.061 | 68  | 94  | 1.39E-04 |
| cg18014844 | <i>PARS2</i>     | -4.918 | 87  | 75  | 1.39E-04 |
| cg20623943 | <i>CMPK</i>      | -5.825 | 112 | 50  | 1.39E-04 |
| cg08063724 | <i>MYCL1</i>     | -5.017 | 65  | 97  | 1.39E-04 |
| cg20225275 | <i>ATP6V0E</i>   | -4.784 | 107 | 55  | 1.39E-04 |
| cg23273333 | <i>ESRRG</i>     | -3.015 | 69  | 93  | 1.39E-04 |
| cg16017492 | <i>EVPL</i>      | 2.038  | 69  | 93  | 1.39E-04 |
| cg21038229 | <i>HMOX2</i>     | -4.596 | 96  | 66  | 1.39E-04 |
| cg05219900 | <i>CREB3</i>     | -4.944 | 80  | 82  | 1.39E-04 |
| cg00213714 | <i>TRIM32</i>    | -4.145 | 42  | 120 | 1.39E-04 |
| cg18680021 | <i>OTUB2</i>     | -5.537 | 64  | 98  | 1.39E-04 |
| cg25095380 | <i>PRDM5</i>     | -5.164 | 41  | 121 | 1.39E-04 |
| cg16601861 | <i>ALDH1A1</i>   | -3.661 | 107 | 55  | 1.40E-04 |
| cg03522403 | <i>STAU</i>      | -4.672 | 92  | 70  | 1.40E-04 |
| cg10857807 | <i>MAD1L1</i>    | -5.843 | 52  | 110 | 1.40E-04 |
| cg08704884 | <i>UBE2M</i>     | -3.792 | 126 | 36  | 1.40E-04 |
| cg04032566 | <i>NSUN3</i>     | 3.991  | 52  | 110 | 1.40E-04 |
| cg14307212 | <i>SLC12A6</i>   | -3.479 | 90  | 72  | 1.40E-04 |
| cg10183248 | <i>UBTF</i>      | -4.502 | 74  | 88  | 1.40E-04 |
| cg26868799 | <i>SYVN1</i>     | -5.300 | 80  | 82  | 1.41E-04 |
| cg12711814 | <i>ENO1</i>      | -4.437 | 75  | 87  | 1.41E-04 |
| cg18757066 | <i>LEREPO4</i>   | -5.622 | 81  | 81  | 1.41E-04 |
| cg21261477 | <i>CABC1</i>     | -4.801 | 75  | 87  | 1.41E-04 |
| cg25547939 | <i>VEGFB</i>     | 1.844  | 75  | 87  | 1.41E-04 |
| cg19669036 | <i>SNAP29</i>    | -4.756 | 79  | 83  | 1.41E-04 |
| cg16746737 | <i>UBE2D3</i>    | -5.961 | 55  | 107 | 1.41E-04 |
| cg13670595 | <i>CDR2L</i>     | -5.929 | 80  | 82  | 1.42E-04 |
| cg21379309 | <i>C14orf147</i> | -5.749 | 75  | 87  | 1.42E-04 |
| cg23377693 | <i>GTPBP2</i>    | -4.576 | 92  | 70  | 1.42E-04 |
| cg26478992 | <i>ASPN</i>      | 2.876  | 55  | 107 | 1.42E-04 |
| cg26763524 | <i>FDX1</i>      | -5.053 | 57  | 105 | 1.42E-04 |

|            |               |        |     |     |          |
|------------|---------------|--------|-----|-----|----------|
| cg08552254 | JMJD2A        | -1.481 | 62  | 100 | 1.42E-04 |
| cg17665608 | GALNACT-2     | -4.692 | 70  | 92  | 1.42E-04 |
| cg08696890 | CPNE2         | -5.421 | 61  | 101 | 1.42E-04 |
| cg09615786 | DCBLD2        | -4.949 | 133 | 29  | 1.42E-04 |
| cg23154272 | LENEP         | 0.861  | 100 | 62  | 1.42E-04 |
| cg16319213 | PCNT2         | -4.311 | 82  | 80  | 1.42E-04 |
| cg08163803 | EFHA1         | -3.838 | 103 | 59  | 1.42E-04 |
| cg14702264 | FLJ10099      | -4.067 | 60  | 102 | 1.42E-04 |
| cg08151281 | BRP44         | -4.414 | 39  | 123 | 1.42E-04 |
| cg17987231 | COQ10B        | -4.891 | 110 | 52  | 1.42E-04 |
| cg27541374 | LOC51136      | -4.074 | 54  | 108 | 1.42E-04 |
| cg26702875 | COPG2         | -4.722 | 77  | 85  | 1.42E-04 |
| cg17832162 | SEC11L3       | -4.659 | 41  | 121 | 1.42E-04 |
| cg04172043 | RELA          | -5.646 | 102 | 60  | 1.42E-04 |
| cg06240849 | KIAA0494      | -4.681 | 38  | 124 | 1.42E-04 |
| cg25510610 | WHSC1L1       | -4.524 | 101 | 61  | 1.42E-04 |
| cg10075436 | ZNF42         | -4.854 | 72  | 90  | 1.42E-04 |
| cg12685200 | LGMN          | -5.350 | 42  | 120 | 1.43E-04 |
| cg03177025 | RBKS          | -1.795 | 107 | 55  | 1.43E-04 |
| cg06792598 | CD55          | -4.036 | 37  | 125 | 1.43E-04 |
| cg13940405 | GOSR2         | -5.366 | 99  | 63  | 1.43E-04 |
| cg23559331 | KCNH4         | -3.464 | 95  | 67  | 1.43E-04 |
| cg21549904 | GALNT7        | -5.122 | 101 | 61  | 1.43E-04 |
| cg09475757 | NEIL3         | -3.266 | 75  | 87  | 1.43E-04 |
| cg15602950 | SACM1L        | -4.667 | 55  | 107 | 1.43E-04 |
| cg22552168 | BMP1          | -3.436 | 59  | 103 | 1.43E-04 |
| cg05011232 | ETV4          | -4.684 | 99  | 63  | 1.43E-04 |
| cg06892726 | HFE           | -3.129 | 91  | 71  | 1.43E-04 |
| cg26491425 | RHOV          | -3.674 | 106 | 56  | 1.43E-04 |
| cg27327588 | ZNF345        | -4.850 | 61  | 101 | 1.43E-04 |
| cg24043192 | FLJ32363      | -3.549 | 65  | 97  | 1.43E-04 |
| cg12203852 | ARID4A        | -5.592 | 55  | 107 | 1.43E-04 |
| cg12032620 | TP53BP1       | -4.792 | 42  | 120 | 1.43E-04 |
| cg17983274 | PPME1         | -5.247 | 46  | 116 | 1.44E-04 |
| cg03279443 | VDAC2         | -4.038 | 63  | 99  | 1.44E-04 |
| cg14631703 | EIF3S12       | -3.652 | 55  | 107 | 1.44E-04 |
| cg18278261 | FUS           | -6.343 | 76  | 86  | 1.44E-04 |
| cg00711916 | CNNM4         | -3.818 | 65  | 97  | 1.44E-04 |
| cg08284598 | SLC4A11       | 1.846  | 85  | 77  | 1.44E-04 |
| cg05538387 | RP11-529I10.4 | -5.401 | 118 | 44  | 1.44E-04 |
| cg24527001 | NDUFB1        | -5.371 | 74  | 88  | 1.44E-04 |
| cg17460846 | COX15         | -4.491 | 86  | 76  | 1.44E-04 |
| cg08764758 | FLJ34922      | -4.902 | 47  | 115 | 1.44E-04 |
| cg02178898 | MTRF1         | -3.790 | 100 | 62  | 1.44E-04 |
| cg10338338 | SLC2A3        | -3.218 | 54  | 108 | 1.44E-04 |
| cg24711626 | KIAA1012      | -6.237 | 53  | 109 | 1.44E-04 |
| cg24990612 | PDGFB         | -3.318 | 37  | 125 | 1.44E-04 |
| cg02239082 | PSCD2         | -6.417 | 56  | 106 | 1.44E-04 |
| cg19286604 | MGC39545      | -3.065 | 85  | 77  | 1.44E-04 |
| cg09486567 | OVOL2         | -4.731 | 87  | 75  | 1.44E-04 |
| cg11705439 | PRKCSH        | -5.395 | 70  | 92  | 1.44E-04 |
| cg13427055 | HERC5         | -5.016 | 60  | 102 | 1.44E-04 |
| cg17305187 | KLF15         | -4.424 | 71  | 91  | 1.45E-04 |
| cg23643330 | JAG1          | -5.313 | 36  | 126 | 1.45E-04 |
| cg18112163 | STAT3         | -4.934 | 37  | 125 | 1.45E-04 |

|            |          |        |     |     |          |
|------------|----------|--------|-----|-----|----------|
| cg27196102 | COG7     | -5.010 | 68  | 94  | 1.45E-04 |
| cg08574156 | CAMK2N2  | -5.256 | 65  | 97  | 1.45E-04 |
| cg02141675 | GALNT10  | -4.368 | 40  | 122 | 1.45E-04 |
| cg19961382 | RANGAP1  | -4.402 | 44  | 118 | 1.45E-04 |
| cg14317651 | COPS2    | -4.817 | 80  | 82  | 1.45E-04 |
| cg14568338 | IGF1R    | -3.702 | 56  | 106 | 1.45E-04 |
| cg27194614 | STK4     | -4.741 | 102 | 60  | 1.45E-04 |
| cg03143365 | MAN2B1   | -4.153 | 71  | 91  | 1.45E-04 |
| cg01661993 | TTYH1    | -3.350 | 118 | 44  | 1.45E-04 |
| cg22397447 | ALDH1B1  | -5.241 | 91  | 71  | 1.45E-04 |
| cg19478743 | CXCL16   | -4.558 | 82  | 80  | 1.46E-04 |
| cg26626042 | AGER     | 1.275  | 80  | 82  | 1.46E-04 |
| cg09508556 | PSORS1C2 | 2.200  | 56  | 106 | 1.46E-04 |
| cg14127958 | DIP13B   | -5.452 | 52  | 110 | 1.46E-04 |
| cg03066138 | RPLP2    | -5.753 | 61  | 101 | 1.46E-04 |
| cg26666286 | KIAA0317 | 2.226  | 93  | 69  | 1.46E-04 |
| cg00722300 | RLN3     | -0.005 | 118 | 44  | 1.46E-04 |
| cg19028804 | C1orf37  | -5.379 | 45  | 117 | 1.46E-04 |
| cg02144933 | AOX1     | -4.706 | 103 | 59  | 1.46E-04 |
| cg02772367 | NUP160   | -4.909 | 108 | 54  | 1.46E-04 |
| cg07960846 | STK11    | -4.152 | 66  | 96  | 1.46E-04 |
| cg12097239 | ARL8B    | -3.879 | 101 | 61  | 1.46E-04 |
| cg15540054 | ZNF180   | -5.035 | 104 | 58  | 1.46E-04 |
| cg16391151 | CARD4    | -5.477 | 60  | 102 | 1.46E-04 |
| cg17823320 | C8orf35  | -4.734 | 91  | 71  | 1.46E-04 |
| cg04998282 | NOL11    | -4.828 | 103 | 59  | 1.46E-04 |
| cg15427656 | ECD      | -3.826 | 70  | 92  | 1.46E-04 |
| cg03112782 | C1orf149 | -4.102 | 56  | 106 | 1.47E-04 |
| cg11976048 | MGC4172  | -5.639 | 50  | 112 | 1.47E-04 |
| cg11117707 | SLC16A6  | -5.665 | 123 | 39  | 1.47E-04 |
| cg14310034 | BMP4     | -4.289 | 71  | 91  | 1.48E-04 |
| cg10237469 | CEACAM4  | -1.219 | 80  | 82  | 1.48E-04 |
| cg13313036 | SLC29A2  | -6.181 | 55  | 107 | 1.48E-04 |
| cg16525692 | CHD1L    | -4.265 | 36  | 126 | 1.48E-04 |
| cg21511069 | UBAP2    | -5.109 | 104 | 58  | 1.48E-04 |
| cg16998207 | FCMD     | -4.787 | 70  | 92  | 1.48E-04 |
| cg19132701 | CHMP6    | -5.912 | 49  | 113 | 1.48E-04 |
| cg22395192 | FAM46B   | -5.153 | 75  | 87  | 1.48E-04 |
| cg02503970 | ST3GAL1  | -5.196 | 96  | 66  | 1.49E-04 |
| cg04940515 | RABGGTB  | -5.683 | 83  | 79  | 1.49E-04 |
| cg21068339 | DSP      | -5.444 | 71  | 91  | 1.49E-04 |
| cg22253036 | DDX6     | -3.235 | 51  | 111 | 1.49E-04 |
| cg00947019 | H2AFV    | -5.445 | 71  | 91  | 1.49E-04 |
| cg01446983 | SPOP     | -6.184 | 52  | 110 | 1.49E-04 |
| cg08697285 | MYCBP2   | -3.525 | 98  | 64  | 1.49E-04 |
| cg07242414 | BMP1     | -3.859 | 79  | 83  | 1.49E-04 |
| cg14098132 | CGRRF1   | -4.476 | 79  | 83  | 1.49E-04 |
| cg05459203 | NUDCD3   | -4.808 | 43  | 119 | 1.49E-04 |
| cg02988947 | LIMD2    | -0.054 | 73  | 89  | 1.49E-04 |
| cg22139878 | IFIT5    | -5.159 | 70  | 92  | 1.49E-04 |
| cg02226697 | SQLE     | -5.600 | 60  | 102 | 1.49E-04 |
| cg08659707 | PUM2     | 1.592  | 34  | 128 | 1.49E-04 |
| cg03550002 | ARSK     | -5.133 | 57  | 105 | 1.49E-04 |
| cg20858478 | B4GALNT2 | -4.448 | 82  | 80  | 1.49E-04 |
| cg23737055 | ANKRD46  | -2.971 | 56  | 106 | 1.50E-04 |

|            |                 |        |     |     |          |
|------------|-----------------|--------|-----|-----|----------|
| cg12687990 |                 | -4.005 | 82  | 80  | 1.50E-04 |
| cg14988503 | <i>CDKL2</i>    | -4.843 | 96  | 66  | 1.50E-04 |
| cg24649346 | <i>CBX6</i>     | -4.379 | 51  | 111 | 1.50E-04 |
| cg08342270 | <i>TLE3</i>     | -2.898 | 100 | 62  | 1.50E-04 |
| cg23759214 | <i>MRE11A</i>   | -3.778 | 85  | 77  | 1.50E-04 |
| cg27254601 | <i>MAZ</i>      | -5.527 | 40  | 122 | 1.50E-04 |
| cg03843951 | <i>DDC</i>      | 1.842  | 88  | 74  | 1.50E-04 |
| cg26894575 | <i>S100A4</i>   | -1.712 | 68  | 94  | 1.51E-04 |
| cg22248011 | <i>TRAM2</i>    | -5.354 | 80  | 82  | 1.51E-04 |
| cg11207379 | <i>TDG</i>      | -5.430 | 68  | 94  | 1.51E-04 |
| cg09872233 | <i>ALOX15</i>   | -4.294 | 72  | 90  | 1.51E-04 |
| cg07748540 | <i>PDGFD</i>    | -4.956 | 59  | 103 | 1.51E-04 |
| cg13834500 | <i>TM9SF1</i>   | -4.698 | 66  | 96  | 1.51E-04 |
| cg11828669 | <i>ZBTB25</i>   | -4.506 | 61  | 101 | 1.52E-04 |
| cg14308291 | <i>EIF2C3</i>   | -4.026 | 53  | 109 | 1.52E-04 |
| cg10396470 | <i>NUP107</i>   | -4.340 | 109 | 53  | 1.52E-04 |
| cg23164327 | <i>OSRF</i>     | -5.056 | 82  | 80  | 1.52E-04 |
| cg09997760 | <i>GNB4</i>     | -5.352 | 81  | 81  | 1.52E-04 |
| cg04350610 | <i>BTAFF1</i>   | -5.085 | 41  | 121 | 1.52E-04 |
| cg02982690 | <i>BHLHB5</i>   | -5.048 | 95  | 67  | 1.53E-04 |
| cg05088386 | <i>ELF2</i>     | 2.115  | 98  | 64  | 1.53E-04 |
| cg09038885 | <i>ADRA1B</i>   | -4.078 | 93  | 69  | 1.53E-04 |
| cg03555909 | <i>TMEM109</i>  | -6.333 | 55  | 107 | 1.53E-04 |
| cg23428445 | <i>GPR37</i>    | -3.893 | 82  | 80  | 1.53E-04 |
| cg06422910 | <i>COPG2</i>    | -5.094 | 59  | 103 | 1.53E-04 |
| cg09573435 | <i>SEMA6A</i>   | -5.186 | 101 | 61  | 1.53E-04 |
| cg18702234 | <i>PSME3</i>    | -3.941 | 95  | 67  | 1.53E-04 |
| cg10403260 | <i>PHF21A</i>   | -5.299 | 40  | 122 | 1.53E-04 |
| cg11337525 | <i>APOC1</i>    | -5.131 | 106 | 56  | 1.54E-04 |
| cg23667407 | <i>LOC51255</i> | -4.968 | 42  | 120 | 1.54E-04 |
| cg20141013 | <i>PRO0149</i>  | -4.941 | 50  | 112 | 1.54E-04 |
| cg00922727 | <i>SESN1</i>    | -4.119 | 81  | 81  | 1.54E-04 |
| cg20247600 | <i>NFE2L2</i>   | -2.885 | 104 | 58  | 1.54E-04 |
| cg06949789 | <i>RPL15</i>    | -5.301 | 83  | 79  | 1.54E-04 |
| cg09671005 | <i>LOC90355</i> | -6.075 | 61  | 101 | 1.54E-04 |
| cg15185286 | <i>AIG1</i>     | -5.553 | 48  | 114 | 1.54E-04 |
| cg22201387 | <i>ENTPD5</i>   | -5.215 | 92  | 70  | 1.54E-04 |
| cg08008562 | <i>UBE2Q1</i>   | -4.657 | 45  | 117 | 1.55E-04 |
| cg05523085 | <i>MYO5A</i>    | -4.793 | 93  | 69  | 1.55E-04 |
| cg00059424 | <i>PES1</i>     | -4.643 | 91  | 71  | 1.55E-04 |
| cg17240496 | <i>LOC51035</i> | -5.539 | 48  | 114 | 1.55E-04 |
| cg02505409 | <i>ANGPTL4</i>  | -5.086 | 108 | 54  | 1.56E-04 |
| cg04042106 | <i>MUS81</i>    | -4.703 | 111 | 51  | 1.56E-04 |
| cg05677402 | <i>UBE2L6</i>   | -6.438 | 67  | 95  | 1.56E-04 |
| cg17847607 | <i>CALR3</i>    | -5.063 | 74  | 88  | 1.56E-04 |
| cg19434936 | <i>MGC31967</i> | -5.434 | 58  | 104 | 1.56E-04 |
| cg03843852 | <i>PIGB</i>     | -5.369 | 107 | 55  | 1.56E-04 |
| cg11584111 | <i>PIGC</i>     | -4.301 | 87  | 75  | 1.56E-04 |
| cg20988728 | <i>MGC17330</i> | -4.839 | 50  | 112 | 1.56E-04 |
| cg09430689 | <i>C14orf1</i>  | -6.660 | 83  | 79  | 1.56E-04 |
| cg09109450 | <i>FLJ21820</i> | -3.638 | 58  | 104 | 1.56E-04 |
| cg00650876 | <i>YBX1</i>     | -5.872 | 64  | 98  | 1.56E-04 |
| cg10107671 | <i>FLJ45684</i> | 5.160  | 78  | 84  | 1.56E-04 |
| cg04680304 | <i>RRM1</i>     | -4.801 | 101 | 61  | 1.57E-04 |
| cg04172348 | <i>SYN2</i>     | -4.280 | 75  | 87  | 1.57E-04 |

|            |                 |        |     |     |          |
|------------|-----------------|--------|-----|-----|----------|
| cg11175477 | <i>RAD9B</i>    | -5.707 | 59  | 103 | 1.57E-04 |
| cg23488190 | <i>POLR2J2</i>  | -5.069 | 75  | 87  | 1.57E-04 |
| cg26624118 | <i>SLC43A1</i>  | -4.596 | 97  | 65  | 1.57E-04 |
| cg15965055 | <i>C1orf32</i>  | -4.709 | 91  | 71  | 1.57E-04 |
| cg11844110 | <i>C1orf132</i> | -3.783 | 102 | 60  | 1.57E-04 |
| cg05338155 | <i>IFIT5</i>    | -4.765 | 87  | 75  | 1.57E-04 |
| cg23142900 | <i>GTF2H4</i>   | -5.362 | 62  | 100 | 1.57E-04 |
| cg17679246 | <i>PDK1</i>     | -5.118 | 60  | 102 | 1.57E-04 |
| cg01437411 | <i>ATN1</i>     | -2.106 | 75  | 87  | 1.58E-04 |
| cg05670596 | <i>CCRL2</i>    | -1.319 | 96  | 66  | 1.58E-04 |
| cg16357381 | <i>COL7A1</i>   | -3.606 | 114 | 48  | 1.58E-04 |
| cg23610841 | <i>PURG</i>     | -2.453 | 119 | 43  | 1.58E-04 |
| cg20149493 | <i>PDCD5</i>    | -5.153 | 97  | 65  | 1.58E-04 |
| cg09011597 | <i>PA2G4</i>    | -4.385 | 75  | 87  | 1.58E-04 |
| cg22461615 | <i>THAP9</i>    | -6.018 | 40  | 122 | 1.58E-04 |
| cg07697078 | <i>PFDN1</i>    | -5.036 | 65  | 97  | 1.59E-04 |
| cg17286491 | <i>CEP350</i>   | -4.528 | 100 | 62  | 1.59E-04 |
| cg07823755 | <i>UGT1A1</i>   | 3.657  | 108 | 54  | 1.59E-04 |
| cg04094160 | <i>ZBTB5</i>    | -4.699 | 55  | 107 | 1.59E-04 |
| cg02358761 | <i>STK17B</i>   | -4.055 | 93  | 69  | 1.59E-04 |
| cg13623690 | <i>COTL1</i>    | -4.728 | 87  | 75  | 1.60E-04 |
| cg14445076 | <i>DHH</i>      | -1.769 | 48  | 114 | 1.60E-04 |
| cg02018101 | <i>SYNE2</i>    | -5.004 | 53  | 109 | 1.60E-04 |
| cg06567423 | <i>STT3A</i>    | -4.762 | 110 | 52  | 1.60E-04 |
| cg07077459 | <i>PLAGL1</i>   | 0.947  | 107 | 55  | 1.60E-04 |
| cg13003163 | <i>ANP32D</i>   | 2.559  | 26  | 136 | 1.60E-04 |
| cg13056269 | <i>MCM6</i>     | -5.191 | 44  | 118 | 1.60E-04 |
| cg11730961 | <i>SFPQ</i>     | -3.607 | 87  | 75  | 1.60E-04 |
| cg15249164 | <i>ATP5O</i>    | -6.173 | 54  | 108 | 1.60E-04 |
| cg11221513 | <i>C22orf9</i>  | -4.756 | 106 | 56  | 1.60E-04 |
| cg21367040 | <i>TMEM50A</i>  | -5.830 | 94  | 68  | 1.60E-04 |
| cg01095590 | <i>KIAA0040</i> | -5.489 | 67  | 95  | 1.60E-04 |
| cg22939715 | <i>C1orf2</i>   | -5.664 | 83  | 79  | 1.60E-04 |
| cg21729186 | <i>HIST1H4H</i> | -5.435 | 53  | 109 | 1.61E-04 |
| cg11718315 | <i>PARP16</i>   | -3.683 | 103 | 59  | 1.61E-04 |
| cg18489434 | <i>VASH1</i>    | -5.660 | 79  | 83  | 1.61E-04 |
| cg13891659 | <i>C6orf208</i> | -4.629 | 41  | 121 | 1.61E-04 |
| cg21988465 | <i>GNAS</i>     | 1.015  | 137 | 25  | 1.61E-04 |
| cg15717808 | <i>KCNQ5</i>    | -5.596 | 90  | 72  | 1.61E-04 |
| cg23323879 | <i>CILP</i>     | 2.347  | 63  | 99  | 1.61E-04 |
| cg24150528 | <i>FLJ10246</i> | 2.727  | 76  | 86  | 1.61E-04 |
| cg05845357 | <i>PGEA1</i>    | -5.517 | 64  | 98  | 1.62E-04 |
| cg21039822 | <i>PCYT2</i>    | -5.792 | 63  | 99  | 1.62E-04 |
| cg09847584 | <i>RIMBP2</i>   | 3.159  | 45  | 117 | 1.62E-04 |
| cg10277146 | <i>SPAST</i>    | -4.124 | 105 | 57  | 1.62E-04 |
| cg22499237 | <i>PDPK1</i>    | -4.586 | 89  | 73  | 1.62E-04 |
| cg23828212 | <i>MAN1A2</i>   | -5.841 | 58  | 104 | 1.62E-04 |
| cg02032115 | <i>IGSF8</i>    | -4.677 | 113 | 49  | 1.62E-04 |
| cg04853151 | <i>C1orf83</i>  | -3.194 | 71  | 91  | 1.62E-04 |
| cg00746130 | <i>BAT5</i>     | -4.098 | 49  | 113 | 1.62E-04 |
| cg06675341 | <i>PRMT3</i>    | -4.244 | 60  | 102 | 1.62E-04 |
| cg18036707 | <i>TBCE</i>     | -5.137 | 66  | 96  | 1.62E-04 |
| cg25171089 | <i>ASB13</i>    | -5.334 | 62  | 100 | 1.62E-04 |
| cg07851278 | <i>RIOK3</i>    | -5.090 | 74  | 88  | 1.62E-04 |
| cg16050957 | <i>RBBP6</i>    | -5.948 | 62  | 100 | 1.62E-04 |

|            |                  |        |     |     |          |
|------------|------------------|--------|-----|-----|----------|
| cg00115714 | <i>AMD1</i>      | -4.114 | 73  | 89  | 1.63E-04 |
| cg17133183 | <i>CRABP1</i>    | -4.944 | 49  | 113 | 1.63E-04 |
| cg25483839 | <i>RAD23B</i>    | -3.604 | 41  | 121 | 1.63E-04 |
| cg10321208 | <i>CPT2</i>      | -4.279 | 99  | 63  | 1.63E-04 |
| cg12422968 | <i>GCH1</i>      | -5.142 | 32  | 130 | 1.63E-04 |
| cg27522780 | <i>ACADS</i>     | -4.558 | 48  | 114 | 1.63E-04 |
| cg17946497 | <i>DUSP1</i>     | -5.626 | 50  | 112 | 1.64E-04 |
| cg20082357 | <i>ATP6V0A1</i>  | -5.808 | 48  | 114 | 1.64E-04 |
| cg02841933 | <i>NRF1</i>      | -5.729 | 61  | 101 | 1.64E-04 |
| cg21604803 | <i>CPT1C</i>     | -4.663 | 100 | 62  | 1.65E-04 |
| cg08009622 | <i>COL12A1</i>   | -4.320 | 84  | 78  | 1.65E-04 |
| cg11314292 | <i>RNF125</i>    | -3.935 | 74  | 88  | 1.65E-04 |
| cg17120423 | <i>CIRH1A</i>    | -5.190 | 99  | 63  | 1.65E-04 |
| cg01320361 | <i>SEC63</i>     | -4.953 | 78  | 84  | 1.65E-04 |
| cg03064241 | <i>RNF34</i>     | -5.823 | 60  | 102 | 1.65E-04 |
| cg04997967 | <i>KCNIP2</i>    | -1.964 | 79  | 83  | 1.65E-04 |
| cg10162464 | <i>ZNF282</i>    | -3.167 | 60  | 102 | 1.65E-04 |
| cg09930410 | <i>GALE</i>      | -5.368 | 68  | 94  | 1.65E-04 |
| cg02303361 | <i>AP2S1</i>     | -4.907 | 84  | 78  | 1.65E-04 |
| cg14127659 | <i>C22orf23</i>  | 0.395  | 104 | 58  | 1.65E-04 |
| cg15877314 | <i>GNAI2</i>     | -5.232 | 61  | 101 | 1.65E-04 |
| cg01881255 | <i>SERTAD3</i>   | -6.786 | 95  | 67  | 1.66E-04 |
| cg08048656 | <i>SMARCE1</i>   | -5.010 | 57  | 105 | 1.66E-04 |
| cg20315643 | <i>TAF1C</i>     | -4.043 | 58  | 104 | 1.66E-04 |
| cg22636253 | <i>SSRP1</i>     | -5.508 | 34  | 128 | 1.66E-04 |
| cg19219503 | <i>ANKRD30A</i>  | 3.372  | 46  | 116 | 1.66E-04 |
| cg00223186 | <i>ACBD6</i>     | -4.856 | 82  | 80  | 1.66E-04 |
| cg20676542 | <i>TRIM25</i>    | -4.946 | 91  | 71  | 1.66E-04 |
| cg09634802 | <i>THRA</i>      | -4.681 | 76  | 86  | 1.67E-04 |
| cg10245048 | <i>TNFRSF10A</i> | -4.495 | 79  | 83  | 1.67E-04 |
| cg11821147 | <i>THAP2</i>     | -5.930 | 109 | 53  | 1.67E-04 |
| cg18697049 | <i>CDC2L6</i>    | -5.492 | 44  | 118 | 1.67E-04 |
| cg24392479 | <i>ASPSCR1</i>   | -4.290 | 32  | 130 | 1.67E-04 |
| cg24596472 | <i>TOP1MT</i>    | -3.085 | 72  | 90  | 1.67E-04 |
| cg00679738 | <i>FAM89A</i>    | -4.862 | 82  | 80  | 1.67E-04 |
| cg19635810 | <i>C2orf18</i>   | -5.907 | 54  | 108 | 1.67E-04 |
| cg11050116 | <i>PCM1</i>      | -5.631 | 50  | 112 | 1.67E-04 |
| cg21802726 | <i>C20orf31</i>  | -4.476 | 80  | 82  | 1.67E-04 |
| cg11490446 | <i>PSEN1</i>     | -4.639 | 96  | 66  | 1.67E-04 |
| cg22732672 | <i>CSTF1</i>     | -5.311 | 70  | 92  | 1.67E-04 |
| cg22527415 | <i>LSM16</i>     | -3.883 | 87  | 75  | 1.67E-04 |
| cg27205791 | <i>COPZ1</i>     | -5.411 | 62  | 100 | 1.67E-04 |
| cg14043411 | <i>SIVA</i>      | -6.278 | 67  | 95  | 1.68E-04 |
| cg13271076 | <i>PRMT2</i>     | -4.573 | 84  | 78  | 1.68E-04 |
| cg01787047 | <i>RAD9A</i>     | -5.526 | 85  | 77  | 1.68E-04 |
| cg02543879 | <i>VPS36</i>     | -4.818 | 78  | 84  | 1.68E-04 |
| cg25007680 | <i>PARK7</i>     | -4.086 | 29  | 133 | 1.68E-04 |
| cg26527984 | <i>GALK1</i>     | -0.076 | 99  | 63  | 1.68E-04 |
| cg19646028 | <i>C19orf30</i>  | -1.749 | 83  | 79  | 1.68E-04 |
| cg27563778 | <i>C4orf17</i>   | 1.291  | 94  | 68  | 1.69E-04 |
| cg03386140 | <i>ANGEL2</i>    | -5.160 | 58  | 104 | 1.69E-04 |
| cg00419564 | <i>S100A6</i>    | -5.280 | 72  | 90  | 1.69E-04 |
| cg10798171 | <i>ICA1</i>      | -1.530 | 105 | 57  | 1.69E-04 |
| cg14364739 | <i>NOSIP</i>     | -5.503 | 94  | 68  | 1.69E-04 |
| cg16910379 | <i>C17orf79</i>  | -4.633 | 80  | 82  | 1.69E-04 |

|            |                   |        |     |     |          |
|------------|-------------------|--------|-----|-----|----------|
| cg19319490 | <i>GUSB</i>       | -6.515 | 69  | 93  | 1.69E-04 |
| cg27309253 | <i>ZNF155</i>     | -5.815 | 102 | 60  | 1.69E-04 |
| cg00240432 | <i>TWIST1</i>     | -4.757 | 91  | 71  | 1.69E-04 |
| cg10905918 | <i>RPS24</i>      | -3.777 | 53  | 109 | 1.69E-04 |
| cg10423227 | <i>AFTIPHILIN</i> | -5.208 | 84  | 78  | 1.69E-04 |
| cg09985635 | <i>PCDH1</i>      | -4.893 | 72  | 90  | 1.69E-04 |
| cg15623573 | <i>APBA1</i>      | -4.123 | 95  | 67  | 1.69E-04 |
| cg13892015 | <i>PPIL5</i>      | -4.175 | 57  | 105 | 1.69E-04 |
| cg22226839 | <i>ATP2B4</i>     | -0.500 | 40  | 122 | 1.69E-04 |
| cg23361608 | <i>DSCR5</i>      | -5.068 | 81  | 81  | 1.70E-04 |
| cg00096922 | <i>DLX5</i>       | -4.436 | 68  | 94  | 1.70E-04 |
| cg06476606 | <i>IFIT2</i>      | -4.208 | 119 | 43  | 1.70E-04 |
| cg18591973 | <i>SMARCD1</i>    | -5.375 | 78  | 84  | 1.70E-04 |
| cg16366323 | <i>DUSP3</i>      | -4.406 | 91  | 71  | 1.70E-04 |
| cg13430851 | <i>C10orf7</i>    | -2.877 | 44  | 118 | 1.70E-04 |
| cg09686635 | <i>C1orf107</i>   | -2.446 | 104 | 58  | 1.70E-04 |
| cg07129274 | <i>HIST1H2AL</i>  | -4.692 | 67  | 95  | 1.70E-04 |
| cg20458981 | <i>NARG1L</i>     | -4.279 | 52  | 110 | 1.70E-04 |
| cg23228048 | <i>BAHD1</i>      | -4.205 | 71  | 91  | 1.70E-04 |
| cg07299462 | <i>MED8</i>       | -5.947 | 91  | 71  | 1.70E-04 |
| cg08158570 | <i>ZNF503</i>     | -5.287 | 80  | 82  | 1.70E-04 |
| cg13298382 | <i>NIT1</i>       | -5.151 | 117 | 45  | 1.70E-04 |
| cg17347389 | <i>TRIM9</i>      | -4.747 | 119 | 43  | 1.70E-04 |
| cg12026956 | <i>TNPO1</i>      | -4.039 | 89  | 73  | 1.70E-04 |
| cg19025723 | <i>ATPIF1</i>     | -5.071 | 97  | 65  | 1.71E-04 |
| cg12422683 | <i>MICAL2</i>     | -4.109 | 50  | 112 | 1.71E-04 |
| cg25214346 | <i>NR1I3</i>      | 2.031  | 77  | 85  | 1.71E-04 |
| cg25202404 | <i>PXMP3</i>      | -5.671 | 43  | 119 | 1.71E-04 |
| cg22051865 | <i>ARHGEF17</i>   | -5.748 | 55  | 107 | 1.72E-04 |
| cg16585682 | <i>SCGB3A1</i>    | -4.206 | 88  | 74  | 1.72E-04 |
| cg24535573 | <i>C1orf126</i>   | -4.527 | 91  | 71  | 1.73E-04 |
| cg20648108 | <i>CTTNBP2NL</i>  | -4.673 | 34  | 128 | 1.73E-04 |
| cg05113558 | <i>FOXH1</i>      | 1.346  | 89  | 73  | 1.73E-04 |
| cg07387450 | <i>TMED5</i>      | -5.786 | 52  | 110 | 1.73E-04 |
| cg25969212 | <i>EXOSC9</i>     | -5.018 | 46  | 116 | 1.73E-04 |
| cg26577945 | <i>STAM</i>       | -5.188 | 60  | 102 | 1.74E-04 |
| cg18840461 | <i>ANKRD43</i>    | -4.405 | 83  | 79  | 1.74E-04 |
| cg07113600 | <i>KLF12</i>      | -5.451 | 67  | 95  | 1.74E-04 |
| cg08265265 | <i>SLC39A3</i>    | -4.618 | 111 | 51  | 1.74E-04 |
| cg13386234 | <i>DAD1</i>       | -5.620 | 71  | 91  | 1.74E-04 |
| cg19355685 | <i>ZFAND2B</i>    | -7.319 | 65  | 97  | 1.74E-04 |
| cg23496260 | <i>BASP1</i>      | -3.063 | 67  | 95  | 1.74E-04 |
| cg24012034 | <i>ETNK1</i>      | -5.958 | 95  | 67  | 1.74E-04 |
| cg00904574 | <i>PLK3</i>       | -5.146 | 93  | 69  | 1.74E-04 |
| cg00493400 | <i>STAT1</i>      | -5.566 | 56  | 106 | 1.74E-04 |
| cg01546046 | <i>AP4S1</i>      | -1.527 | 64  | 98  | 1.74E-04 |
| cg19120746 | <i>TRIM45</i>     | -4.168 | 65  | 97  | 1.74E-04 |
| cg25438440 | <i>CLDND1</i>     | -5.911 | 55  | 107 | 1.74E-04 |
| cg27274728 | <i>CASP6</i>      | -5.774 | 65  | 97  | 1.74E-04 |
| cg09770154 | <i>MXI1</i>       | -5.685 | 51  | 111 | 1.74E-04 |
| cg23915111 | <i>KIF14</i>      | -2.657 | 102 | 60  | 1.74E-04 |
| cg02387613 | <i>TOPBP1</i>     | -5.208 | 40  | 122 | 1.75E-04 |
| cg25294646 | <i>OBFC1</i>      | -4.774 | 51  | 111 | 1.75E-04 |
| cg06084557 | <i>BTBD7</i>      | -4.207 | 110 | 52  | 1.75E-04 |
| cg23104823 | <i>PRPF39</i>     | -4.142 | 105 | 57  | 1.75E-04 |

|            |                 |        |     |     |          |
|------------|-----------------|--------|-----|-----|----------|
| cg08383063 | <i>RB1</i>      | -4.668 | 93  | 69  | 1.75E-04 |
| cg10615091 | <i>FAM13C1</i>  | -4.633 | 53  | 109 | 1.75E-04 |
| cg12591323 | <i>SMARCAL1</i> | 3.378  | 81  | 81  | 1.75E-04 |
| cg04798796 | <i>GLUD1</i>    | -4.926 | 116 | 46  | 1.75E-04 |
| cg19432434 | <i>SIKE</i>     | -4.939 | 29  | 133 | 1.75E-04 |
| cg27649653 | <i>ZNF8</i>     | -1.304 | 63  | 99  | 1.75E-04 |
| cg08932320 | <i>GMD5</i>     | -5.504 | 99  | 63  | 1.76E-04 |
| cg10662787 | <i>LGTV</i>     | -3.737 | 81  | 81  | 1.76E-04 |
| cg27412093 | <i>CAPN9</i>    | 1.475  | 95  | 67  | 1.76E-04 |
| cg07967643 | <i>FRS3</i>     | -5.308 | 86  | 76  | 1.76E-04 |
| cg08948050 | <i>SLC35A4</i>  | 3.156  | 72  | 90  | 1.76E-04 |
| cg19703826 | <i>ZNF213</i>   | -4.353 | 53  | 109 | 1.77E-04 |
| cg18338296 | <i>THRSP</i>    | 3.424  | 62  | 100 | 1.77E-04 |
| cg08695830 | <i>CYLN2</i>    | -3.677 | 60  | 102 | 1.77E-04 |
| cg16280922 | <i>C1orf26</i>  | -4.225 | 45  | 117 | 1.77E-04 |
| cg22585988 | <i>PVRL4</i>    | 0.644  | 93  | 69  | 1.77E-04 |
| cg11136251 | <i>ZWILCH</i>   | -4.750 | 87  | 75  | 1.77E-04 |
| cg17894008 | <i>NACAL</i>    | 3.105  | 88  | 74  | 1.77E-04 |
| cg10913563 | <i>C8orf55</i>  | -3.843 | 94  | 68  | 1.78E-04 |
| cg13755023 | <i>LRRC6</i>    | -4.679 | 54  | 108 | 1.78E-04 |
| cg05604720 | <i>RIPK2</i>    | -4.374 | 75  | 87  | 1.78E-04 |
| cg09587549 | <i>PYCARD</i>   | -4.574 | 128 | 34  | 1.78E-04 |
| cg02310296 | <i>MMP9</i>     | -1.639 | 85  | 77  | 1.78E-04 |
| cg15488251 | <i>MYH11</i>    | -5.177 | 63  | 99  | 1.78E-04 |
| cg07191600 | <i>TRERF1</i>   | -5.718 | 94  | 68  | 1.78E-04 |
| cg20492121 | <i>GLUL</i>     | -5.032 | 79  | 83  | 1.78E-04 |
| cg10682057 | <i>ASAH1</i>    | -5.839 | 47  | 115 | 1.78E-04 |
| cg13540795 | <i>ZNF432</i>   | -4.566 | 96  | 66  | 1.78E-04 |
| cg16338822 | <i>TPX2</i>     | -4.787 | 103 | 59  | 1.78E-04 |
| cg18619831 | <i>RPAP1</i>    | -5.755 | 63  | 99  | 1.78E-04 |
| cg05060662 | <i>HIST4H4</i>  | -4.804 | 79  | 83  | 1.78E-04 |
| cg11893236 | <i>PRMT7</i>    | -5.023 | 117 | 45  | 1.78E-04 |
| cg04506628 | <i>SNRPC</i>    | -4.026 | 53  | 109 | 1.79E-04 |
| cg26162695 | <i>ELAC2</i>    | -5.907 | 52  | 110 | 1.79E-04 |
| cg12197254 | <i>C16orf9</i>  | -4.344 | 81  | 81  | 1.79E-04 |
| cg14519525 | <i>GANAB</i>    | -4.944 | 74  | 88  | 1.79E-04 |
| cg00321065 | <i>RLF</i>      | -4.854 | 96  | 66  | 1.79E-04 |
| cg20917484 | <i>GAPDH</i>    | -4.942 | 86  | 76  | 1.79E-04 |
| cg20173259 | <i>LHB</i>      | -5.068 | 72  | 90  | 1.79E-04 |
| cg17560327 | <i>ZNF417</i>   | -5.434 | 93  | 69  | 1.79E-04 |
| cg00167504 | <i>BLVRA</i>    | -4.592 | 82  | 80  | 1.79E-04 |
| cg23723933 | <i>AKAP9</i>    | -4.249 | 73  | 89  | 1.80E-04 |
| cg16174234 | <i>MGC32020</i> | -4.923 | 112 | 50  | 1.80E-04 |
| cg26294850 | <i>TSPAN1</i>   | -3.756 | 81  | 81  | 1.80E-04 |
| cg09161592 | <i>PANK1</i>    | -5.850 | 117 | 45  | 1.80E-04 |
| cg15643724 | <i>GFER</i>     | -4.050 | 68  | 94  | 1.80E-04 |
| cg16257685 | <i>UCHL3</i>    | -5.192 | 44  | 118 | 1.81E-04 |
| cg07274506 | <i>NOL9</i>     | -5.921 | 76  | 86  | 1.81E-04 |
| cg02366059 | <i>C18orf45</i> | -2.475 | 99  | 63  | 1.81E-04 |
| cg27069263 | <i>RTN4</i>     | -4.355 | 51  | 111 | 1.81E-04 |
| cg23641648 | <i>MRPS9</i>    | -5.220 | 63  | 99  | 1.81E-04 |
| cg26776077 | <i>FLJ45202</i> | 2.124  | 54  | 108 | 1.81E-04 |
| cg09390902 | <i>NSUN5C</i>   | -5.750 | 71  | 91  | 1.81E-04 |
| cg17264817 | <i>BCL2L13</i>  | -6.092 | 83  | 79  | 1.81E-04 |
| cg00177923 | <i>LEPROTL1</i> | -5.313 | 42  | 120 | 1.81E-04 |

|            |           |        |     |     |          |
|------------|-----------|--------|-----|-----|----------|
| cg22050705 | ZNF197    | -5.237 | 43  | 119 | 1.81E-04 |
| cg24102360 | ZNF333    | -4.595 | 86  | 76  | 1.82E-04 |
| cg12701576 | PEX19     | -4.873 | 43  | 119 | 1.82E-04 |
| cg23867624 | FOXC1     | -6.493 | 96  | 66  | 1.82E-04 |
| cg00239071 | C14orf68  | 3.940  | 70  | 92  | 1.82E-04 |
| cg08965527 | LRRC50    | -4.433 | 81  | 81  | 1.82E-04 |
| cg13597949 | CKAP1     | -5.100 | 72  | 90  | 1.82E-04 |
| cg02273392 | SERPINE1  | -4.890 | 54  | 108 | 1.82E-04 |
| cg01979004 | MGC24381  | -4.634 | 94  | 68  | 1.82E-04 |
| cg13222081 | MRPL52    | -3.983 | 77  | 85  | 1.82E-04 |
| cg25346972 | C14orf112 | -5.549 | 85  | 77  | 1.82E-04 |
| cg26649005 | ZNF32     | -5.269 | 33  | 129 | 1.82E-04 |
| cg26074851 | SKP1A     | -5.880 | 62  | 100 | 1.82E-04 |
| cg21284880 | LHFP      | -4.920 | 62  | 100 | 1.82E-04 |
| cg15801967 | NHP2L1    | -5.033 | 87  | 75  | 1.82E-04 |
| cg20744464 | MFI2      | -4.690 | 75  | 87  | 1.82E-04 |
| cg26369667 | YAP1      | -5.570 | 73  | 89  | 1.82E-04 |
| cg09929612 | ATP5J2    | -4.789 | 64  | 98  | 1.82E-04 |
| cg08102619 | TIAL1     | -4.553 | 51  | 111 | 1.82E-04 |
| cg24221059 | PSMB6     | -4.492 | 79  | 83  | 1.83E-04 |
| cg21099488 | PELI2     | -4.461 | 97  | 65  | 1.83E-04 |
| cg03072102 | LRR1Q2    | -5.110 | 118 | 44  | 1.83E-04 |
| cg09086761 | MTA2      | -5.721 | 54  | 108 | 1.83E-04 |
| cg09998229 | TBXA2R    | -4.090 | 92  | 70  | 1.83E-04 |
| cg04621255 | ENDOG     | -5.626 | 99  | 63  | 1.84E-04 |
| cg25438054 | SGTB      | -4.098 | 67  | 95  | 1.84E-04 |
| cg04251662 | ITPR1     | -5.701 | 69  | 93  | 1.84E-04 |
| cg10485472 | TMEM68    | -4.925 | 111 | 51  | 1.84E-04 |
| cg13112336 | MCMDC1    | -3.716 | 81  | 81  | 1.84E-04 |
| cg15691841 | ZNF687    | -5.120 | 75  | 87  | 1.84E-04 |
| cg01602596 | KRT14     | 1.252  | 69  | 93  | 1.84E-04 |
| cg26968812 | TPM4      | -2.916 | 65  | 97  | 1.84E-04 |
| cg19889584 | LAT1-3TM  | 2.133  | 77  | 85  | 1.84E-04 |
| cg22722822 | CHIC2     | -4.756 | 45  | 117 | 1.84E-04 |
| cg10362426 | C1orf83   | -3.271 | 66  | 96  | 1.85E-04 |
| cg01027739 | DOLPP1    | -3.880 | 98  | 64  | 1.85E-04 |
| cg05905876 | SEC11L1   | -5.782 | 69  | 93  | 1.85E-04 |
| cg17738494 | BRPF1     | -4.517 | 92  | 70  | 1.85E-04 |
| cg23121547 | DUSP8     | -6.289 | 82  | 80  | 1.85E-04 |
| cg18287975 | MEF2C     | -5.347 | 108 | 54  | 1.85E-04 |
| cg11256279 | C7orf23   | -4.970 | 104 | 58  | 1.85E-04 |
| cg10935709 | CBWD1     | -4.888 | 54  | 108 | 1.85E-04 |
| cg23837897 | COX11     | -4.789 | 96  | 66  | 1.85E-04 |
| cg00012199 | RNASE4    | -5.662 | 31  | 131 | 1.85E-04 |
| cg00954003 | TMSB10    | -5.988 | 33  | 129 | 1.85E-04 |
| cg15232450 | SETMAR    | -5.272 | 69  | 93  | 1.85E-04 |
| cg17277529 | FGF3      | -4.490 | 104 | 58  | 1.85E-04 |
| cg26044825 | NFIC      | -5.319 | 54  | 108 | 1.85E-04 |
| cg19184518 | UNQ9217   | -5.421 | 41  | 121 | 1.85E-04 |
| cg20295000 | LONPL     | -4.937 | 62  | 100 | 1.85E-04 |
| cg22272545 | STK17B    | -4.665 | 77  | 85  | 1.86E-04 |
| cg05964373 | TEX9      | -4.376 | 72  | 90  | 1.86E-04 |
| cg13668397 | LIG1      | -4.707 | 75  | 87  | 1.87E-04 |
| cg16904306 | PCSK5     | -5.059 | 94  | 68  | 1.87E-04 |
| cg21037570 | IMMT      | -4.567 | 50  | 112 | 1.87E-04 |

|            |                 |        |     |     |          |
|------------|-----------------|--------|-----|-----|----------|
| cg00178790 | <i>C18orf19</i> | -4.324 | 41  | 121 | 1.87E-04 |
| cg06185738 | <i>SLC17A6</i>  | -4.217 | 89  | 73  | 1.87E-04 |
| cg08914623 | <i>ALX4</i>     | -3.361 | 79  | 83  | 1.87E-04 |
| cg21016177 | <i>EXOC7</i>    | -4.038 | 86  | 76  | 1.87E-04 |
| cg18776056 | <i>FKBP4</i>    | -5.441 | 85  | 77  | 1.87E-04 |
| cg05087948 | <i>CTSF</i>     | -4.546 | 109 | 53  | 1.87E-04 |
| cg00940891 | <i>FGFRL1</i>   | -5.687 | 49  | 113 | 1.87E-04 |
| cg03694261 | <i>FLJ23554</i> | -4.754 | 70  | 92  | 1.87E-04 |
| cg05965402 | <i>PI4K2B</i>   | -3.601 | 45  | 117 | 1.87E-04 |
| cg18491230 | <i>ANLN</i>     | -4.452 | 59  | 103 | 1.87E-04 |
| cg22800631 | <i>TRRAP</i>    | -3.229 | 34  | 128 | 1.87E-04 |
| cg08400120 | <i>PRKCI</i>    | -4.513 | 85  | 77  | 1.87E-04 |
| cg26168249 | <i>ZFYVE20</i>  | -4.405 | 134 | 28  | 1.87E-04 |
| cg10054127 | <i>APBA2BP</i>  | -6.341 | 70  | 92  | 1.88E-04 |
| cg17050100 | <i>XAB1</i>     | -5.677 | 48  | 114 | 1.88E-04 |
| cg17500329 | <i>C8orf17</i>  | 3.864  | 90  | 72  | 1.88E-04 |
| cg05019152 | <i>FAM82C</i>   | -5.451 | 52  | 110 | 1.88E-04 |
| cg24588599 | <i>C12orf24</i> | -4.328 | 33  | 129 | 1.88E-04 |
| cg01036173 | <i>C9orf46</i>  | -5.566 | 52  | 110 | 1.88E-04 |
| cg12529801 | <i>PRO0149</i>  | -5.347 | 90  | 72  | 1.88E-04 |
| cg26964989 | <i>LAMC3</i>    | -3.160 | 94  | 68  | 1.88E-04 |
| cg01883521 | <i>HIPK1</i>    | -4.851 | 28  | 134 | 1.89E-04 |
| cg22066521 | <i>ABCB5</i>    | 1.497  | 71  | 90  | 1.89E-04 |
| cg01313966 | <i>C18orf24</i> | -5.097 | 86  | 76  | 1.89E-04 |
| cg04119538 | <i>TOP1</i>     | -4.770 | 106 | 56  | 1.89E-04 |
| cg19510999 | <i>CKLF</i>     | -5.420 | 71  | 91  | 1.89E-04 |
| cg05141870 | <i>CCDC55</i>   | -4.882 | 72  | 90  | 1.89E-04 |
| cg02528468 | <i>ATP11B</i>   | -4.662 | 37  | 125 | 1.89E-04 |
| cg26413355 | <i>UNQ9217</i>  | -5.465 | 113 | 49  | 1.89E-04 |
| cg27376817 | <i>HSPB1</i>    | -3.532 | 39  | 123 | 1.89E-04 |
| cg03188118 | <i>RGS6</i>     | -1.134 | 75  | 87  | 1.89E-04 |
| cg11406695 | <i>C6orf125</i> | -5.070 | 56  | 106 | 1.89E-04 |
| cg17905198 | <i>NDUFV2</i>   | -5.443 | 70  | 92  | 1.90E-04 |
| cg09395833 | <i>ILVBL</i>    | -3.582 | 39  | 123 | 1.90E-04 |
| cg17751569 | <i>CD180</i>    | 2.079  | 120 | 42  | 1.90E-04 |
| cg09000112 | <i>EFNA5</i>    | -4.724 | 65  | 97  | 1.90E-04 |
| cg25264554 | <i>XRN1</i>     | -4.098 | 56  | 106 | 1.90E-04 |
| cg13788062 | <i>FLJ11331</i> | -4.309 | 73  | 89  | 1.90E-04 |
| cg11041457 | <i>GNL3</i>     | -2.684 | 45  | 116 | 1.90E-04 |
| cg11730100 | <i>FEN1</i>     | -2.782 | 84  | 78  | 1.90E-04 |
| cg13265003 | <i>SLC37A1</i>  | 1.263  | 99  | 63  | 1.91E-04 |
| cg02226939 | <i>BLMH</i>     | -3.263 | 86  | 76  | 1.91E-04 |
| cg12290002 | <i>FBXO5</i>    | -5.364 | 40  | 122 | 1.91E-04 |
| cg20088535 | <i>PLK4</i>     | -6.104 | 60  | 102 | 1.91E-04 |
| cg08067365 | <i>G1P2</i>     | -5.165 | 57  | 105 | 1.91E-04 |
| cg22111003 | <i>ACSL3</i>    | -5.029 | 73  | 89  | 1.91E-04 |
| cg01137198 | <i>TA-PP2C</i>  | -5.998 | 73  | 89  | 1.91E-04 |
| cg02045085 | <i>MPP5</i>     | -5.688 | 52  | 110 | 1.91E-04 |
| cg12087643 | <i>GFRA1</i>    | -2.988 | 77  | 85  | 1.91E-04 |
| cg21709140 | <i>GORASP2</i>  | -6.013 | 76  | 86  | 1.91E-04 |
| cg22183849 | <i>DHX36</i>    | -5.414 | 40  | 122 | 1.92E-04 |
| cg02062650 | <i>HCFC1R1</i>  | -4.247 | 111 | 51  | 1.92E-04 |
| cg06252382 | <i>SLC31A2</i>  | -5.144 | 42  | 120 | 1.92E-04 |
| cg19966618 | <i>ACAD8</i>    | -4.264 | 53  | 109 | 1.92E-04 |
| cg18081881 | <i>PGM2</i>     | -6.424 | 94  | 68  | 1.92E-04 |

|            |          |        |     |     |          |
|------------|----------|--------|-----|-----|----------|
| cg18676053 | STOM     | 1.840  | 83  | 79  | 1.93E-04 |
| cg24648061 | GPR22    | 0.913  | 114 | 33  | 1.93E-04 |
| cg02275830 | ZADH1    | -5.571 | 40  | 122 | 1.93E-04 |
| cg03558299 | CSE1L    | -5.234 | 99  | 63  | 1.93E-04 |
| cg21973276 | SMAD6    | -4.664 | 55  | 107 | 1.93E-04 |
| cg26199493 | LIN9     | -4.023 | 101 | 61  | 1.94E-04 |
| cg20886062 | DCI      | -4.971 | 43  | 119 | 1.94E-04 |
| cg25808839 | LACTB    | -5.318 | 33  | 129 | 1.95E-04 |
| cg03930357 | MBTPS1   | -4.288 | 101 | 61  | 1.95E-04 |
| cg08374799 | ITGB7    | -1.132 | 63  | 99  | 1.95E-04 |
| cg10601168 | CNKSR3   | -4.615 | 58  | 104 | 1.95E-04 |
| cg13174197 | GNL3     | -2.742 | 92  | 70  | 1.95E-04 |
| cg21700070 | CNOT3    | -5.789 | 100 | 62  | 1.95E-04 |
| cg24254206 | SNRPD2   | -1.794 | 120 | 42  | 1.95E-04 |
| cg01465620 | ACVR2B   | -4.959 | 41  | 121 | 1.95E-04 |
| cg04574442 | ALG8     | -4.906 | 90  | 72  | 1.95E-04 |
| cg12224394 | AAMP     | -4.955 | 54  | 108 | 1.95E-04 |
| cg01802653 | HERC3    | -4.414 | 34  | 128 | 1.95E-04 |
| cg02848777 | TLL2     | -5.062 | 41  | 121 | 1.95E-04 |
| cg05532892 | PSMA1    | -4.717 | 46  | 116 | 1.95E-04 |
| cg12477119 | CRKRS    | -1.628 | 44  | 118 | 1.95E-04 |
| cg21042619 | EED      | -4.425 | 95  | 67  | 1.95E-04 |
| cg05440218 | C8orf36  | -5.108 | 59  | 103 | 1.95E-04 |
| cg10031651 | LRRC2    | 1.833  | 44  | 118 | 1.95E-04 |
| cg26680127 | MLCK     | -3.437 | 73  | 89  | 1.95E-04 |
| cg04033650 | NSUN5    | -5.472 | 63  | 99  | 1.95E-04 |
| cg08510456 | BSN      | -0.656 | 113 | 49  | 1.95E-04 |
| cg03670238 | WISP1    | 0.753  | 91  | 71  | 1.96E-04 |
| cg03776551 | ZNF396   | -5.509 | 60  | 102 | 1.96E-04 |
| cg09593286 | SQRDL    | -3.870 | 40  | 122 | 1.96E-04 |
| cg17319849 | GBA      | -5.419 | 70  | 92  | 1.96E-04 |
| cg06834261 | WDR12    | -4.134 | 118 | 44  | 1.96E-04 |
| cg02729352 | ZNF432   | -5.345 | 100 | 62  | 1.96E-04 |
| cg07243519 | UFM1     | -5.318 | 69  | 93  | 1.96E-04 |
| cg01322897 | LETMD1   | -5.478 | 46  | 116 | 1.97E-04 |
| cg03704393 | ZNF169   | 3.355  | 74  | 88  | 1.97E-04 |
| cg10457895 | RSRC1    | -5.001 | 43  | 119 | 1.97E-04 |
| cg21008828 | TNK2     | -3.793 | 118 | 44  | 1.97E-04 |
| cg09916853 | TSPAN33  | -2.088 | 81  | 81  | 1.97E-04 |
| cg17176732 | OXR1     | -4.691 | 91  | 71  | 1.97E-04 |
| cg08166982 | CSDE1    | -4.368 | 78  | 84  | 1.98E-04 |
| cg13303256 | PHF1     | -5.212 | 71  | 91  | 1.98E-04 |
| cg21322149 | SENK7    | -5.484 | 68  | 94  | 1.98E-04 |
| cg22580372 | MGC10993 | -5.463 | 91  | 71  | 1.98E-04 |
| cg10773869 | GMCL1    | -5.692 | 43  | 119 | 1.98E-04 |
| cg02226871 | VPS28    | -5.484 | 91  | 71  | 1.98E-04 |
| cg06490162 | C16orf63 | -5.186 | 58  | 104 | 1.98E-04 |
| cg13859541 | TGFBP2   | -4.984 | 71  | 91  | 1.98E-04 |
| cg16236875 | C1R      | -3.298 | 89  | 73  | 1.98E-04 |
| cg21309147 | STAC2    | -4.210 | 95  | 67  | 1.98E-04 |
| cg09479015 | KIRREL2  | -4.182 | 120 | 42  | 1.98E-04 |
| cg23278885 | TGM6     | 1.477  | 62  | 100 | 1.98E-04 |
| cg16956268 | CDK5RAP2 | -3.797 | 58  | 104 | 1.98E-04 |
| cg04736140 | GPR161   | -5.098 | 43  | 119 | 1.98E-04 |
| cg10881306 | CRIM1    | -3.088 | 57  | 105 | 1.99E-04 |

|            |                  |        |     |     |          |
|------------|------------------|--------|-----|-----|----------|
| cg11000221 | <i>DHX40</i>     | -4.515 | 49  | 113 | 1.99E-04 |
| cg09088193 | <i>KA35</i>      | 2.394  | 117 | 45  | 1.99E-04 |
| cg14167017 | <i>UBAP1</i>     | -5.050 | 81  | 81  | 1.99E-04 |
| cg26847093 | <i>FLJ11712</i>  | -5.062 | 102 | 60  | 1.99E-04 |
| cg10847798 | <i>LAMC1</i>     | -3.313 | 95  | 67  | 1.99E-04 |
| cg19448829 | <i>UBR2</i>      | -5.490 | 91  | 71  | 1.99E-04 |
| cg06177968 | <i>WDR55</i>     | -3.953 | 62  | 100 | 1.99E-04 |
| cg25089231 | <i>UST</i>       | -3.613 | 41  | 121 | 1.99E-04 |
| cg22083798 | <i>IGFBP3</i>    | -3.115 | 82  | 80  | 1.99E-04 |
| cg21396405 | <i>MAFG</i>      | -5.907 | 95  | 67  | 1.99E-04 |
| cg07296772 | <i>CHMP4A</i>    | 2.234  | 76  | 86  | 2.00E-04 |
| cg07510080 | <i>HIF1AN</i>    | -3.581 | 47  | 115 | 2.00E-04 |
| cg19598544 | <i>TTYH2</i>     | -4.539 | 60  | 102 | 2.00E-04 |
| cg09656405 | <i>RPLP1</i>     | -5.628 | 52  | 110 | 2.00E-04 |
| cg13908523 | <i>PRKCD</i>     | -5.724 | 48  | 114 | 2.00E-04 |
| cg05457411 | <i>DDX19A</i>    | -4.865 | 125 | 37  | 2.00E-04 |
| cg14993293 | <i>CETN3</i>     | -4.536 | 37  | 125 | 2.00E-04 |
| cg15002187 | <i>SLC37A3</i>   | -3.944 | 67  | 95  | 2.00E-04 |
| cg15809230 | <i>SIN3A</i>     | -5.833 | 77  | 85  | 2.00E-04 |
| cg26132853 | <i>NOL5A</i>     | -5.396 | 57  | 105 | 2.01E-04 |
| cg09020461 | <i>TP53BP1</i>   | -5.473 | 44  | 118 | 2.01E-04 |
| cg02335441 | <i>ASTE1</i>     | -5.086 | 63  | 99  | 2.01E-04 |
| cg07031996 | <i>MTF1</i>      | -3.486 | 92  | 70  | 2.01E-04 |
| cg26721993 | <i>CRR9</i>      | -6.664 | 98  | 64  | 2.01E-04 |
| cg20222911 | <i>MTA1</i>      | -4.512 | 113 | 49  | 2.01E-04 |
| cg01277844 | <i>PYGO2</i>     | -4.617 | 59  | 103 | 2.01E-04 |
| cg06779945 | <i>TNFAIP3</i>   | -5.408 | 93  | 69  | 2.01E-04 |
| cg02123547 | <i>PIM1</i>      | -4.627 | 94  | 68  | 2.02E-04 |
| cg03842617 | <i>NOS3</i>      | 2.866  | 47  | 115 | 2.02E-04 |
| cg15566783 | <i>NIPA2</i>     | -5.048 | 39  | 123 | 2.02E-04 |
| cg05142115 | <i>C7orf24</i>   | -4.313 | 50  | 112 | 2.02E-04 |
| cg22642718 | <i>KCNJ12</i>    | 4.030  | 75  | 87  | 2.02E-04 |
| cg08339208 | <i>SIKE</i>      | -5.611 | 76  | 86  | 2.02E-04 |
| cg06066711 | <i>KLHL21</i>    | -5.245 | 62  | 100 | 2.02E-04 |
| cg11609366 | <i>RPL8</i>      | -4.979 | 109 | 53  | 2.02E-04 |
| cg22996555 | <i>GCS1</i>      | -6.547 | 127 | 35  | 2.02E-04 |
| cg11932564 | <i>TNFRSF13C</i> | -3.987 | 70  | 92  | 2.02E-04 |
| cg18181070 | <i>HTRA2</i>     | -4.325 | 93  | 69  | 2.02E-04 |
| cg22906389 | <i>CASP7</i>     | -5.704 | 95  | 67  | 2.02E-04 |
| cg14299177 | <i>MTFR1</i>     | -5.862 | 56  | 106 | 2.02E-04 |
| cg14964658 | <i>PEX19</i>     | -5.403 | 66  | 96  | 2.02E-04 |
| cg17324707 | <i>C3orf28</i>   | -5.588 | 33  | 129 | 2.03E-04 |
| cg26776069 | <i>C1orf176</i>  | -4.968 | 48  | 114 | 2.03E-04 |
| cg12530270 | <i>DCST1</i>     | 3.375  | 69  | 93  | 2.03E-04 |
| cg05607472 | <i>CSNK1A1</i>   | -6.229 | 78  | 84  | 2.04E-04 |
| cg06839953 | <i>C1orf160</i>  | -5.299 | 33  | 129 | 2.04E-04 |
| cg19219920 | <i>FAM53B</i>    | -5.410 | 59  | 103 | 2.04E-04 |
| cg02486845 | <i>C6orf166</i>  | -4.405 | 105 | 57  | 2.04E-04 |
| cg09892131 | <i>ZBTB9</i>     | -4.167 | 28  | 134 | 2.04E-04 |
| cg07623294 | <i>ELAVL2</i>    | -4.733 | 98  | 64  | 2.04E-04 |
| cg10468369 | <i>DDX19B</i>    | -5.293 | 53  | 109 | 2.04E-04 |
| cg00671161 | <i>ATP7B</i>     | -5.990 | 51  | 111 | 2.04E-04 |
| cg27533013 | <i>KCNRG</i>     | 1.617  | 70  | 92  | 2.04E-04 |
| cg15270851 | <i>FLJ12118</i>  | -4.185 | 87  | 75  | 2.04E-04 |
| cg23087084 | <i>PXMP3</i>     | -5.246 | 55  | 107 | 2.05E-04 |

|            |                  |        |     |     |          |
|------------|------------------|--------|-----|-----|----------|
| cg06418878 | <i>MGC13125</i>  | -5.091 | 98  | 64  | 2.05E-04 |
| cg20576510 | <i>PROM1</i>     | 3.722  | 73  | 89  | 2.05E-04 |
| cg16541031 | <i>IRF7</i>      | -5.396 | 79  | 83  | 2.05E-04 |
| cg26568722 | <i>MCM7</i>      | -5.074 | 81  | 81  | 2.05E-04 |
| cg16567044 | <i>MEG3</i>      | 0.200  | 89  | 73  | 2.05E-04 |
| cg00901766 | <i>MLLT1</i>     | -3.731 | 98  | 64  | 2.05E-04 |
| cg10218646 | <i>ZBTB11</i>    | -4.111 | 60  | 102 | 2.05E-04 |
| cg08343943 | <i>ALDH9A1</i>   | -4.818 | 103 | 59  | 2.05E-04 |
| cg15236866 | <i>DLX1</i>      | -2.739 | 110 | 52  | 2.05E-04 |
| cg21643860 | <i>RBM21</i>     | -5.439 | 60  | 102 | 2.05E-04 |
| cg24994350 | <i>LATS1</i>     | -4.614 | 98  | 64  | 2.05E-04 |
| cg23048366 | <i>HAGH</i>      | -4.813 | 110 | 52  | 2.05E-04 |
| cg14074431 | <i>MAP3K10</i>   | -5.105 | 57  | 105 | 2.06E-04 |
| cg12111697 | <i>ZNF555</i>    | -5.606 | 76  | 86  | 2.06E-04 |
| cg20441175 | <i>DNAJC9</i>    | -5.120 | 92  | 70  | 2.06E-04 |
| cg05399707 | <i>TRIP10</i>    | -5.204 | 46  | 116 | 2.06E-04 |
| cg22281080 | <i>MGC3265</i>   | -4.142 | 50  | 112 | 2.07E-04 |
| cg02144298 | <i>CEBPA</i>     | -5.377 | 69  | 93  | 2.07E-04 |
| cg24687335 | <i>SLC37A4</i>   | -5.608 | 37  | 125 | 2.07E-04 |
| cg26887625 | <i>ZNF497</i>    | -6.142 | 99  | 63  | 2.07E-04 |
| cg07483064 | <i>ENO1</i>      | -5.262 | 85  | 77  | 2.08E-04 |
| cg05709923 | <i>SAMM50</i>    | -4.227 | 57  | 105 | 2.08E-04 |
| cg12693634 | <i>TMEM23</i>    | -2.753 | 81  | 81  | 2.08E-04 |
| cg01491540 | <i>SSH2</i>      | -5.175 | 98  | 64  | 2.08E-04 |
| cg05868316 | <i>FBXW9</i>     | -7.001 | 88  | 74  | 2.08E-04 |
| cg12833508 | <i>AP1S3</i>     | -3.658 | 67  | 95  | 2.08E-04 |
| cg01074640 | <i>IFNA17</i>    | 2.017  | 44  | 118 | 2.08E-04 |
| cg14920426 | <i>PDLIM7</i>    | -4.061 | 30  | 132 | 2.08E-04 |
| cg14507042 | <i>TRAF2</i>     | -4.536 | 35  | 127 | 2.08E-04 |
| cg10840864 | <i>PSMC5</i>     | 2.094  | 74  | 88  | 2.09E-04 |
| cg13707395 | <i>ADAMTS15</i>  | -4.914 | 46  | 116 | 2.09E-04 |
| cg18170080 | <i>ESAM</i>      | -3.733 | 86  | 76  | 2.09E-04 |
| cg22767735 | <i>ALDH3A2</i>   | -4.810 | 54  | 108 | 2.09E-04 |
| cg07448856 | <i>ZNF670</i>    | -5.724 | 106 | 56  | 2.10E-04 |
| cg18424091 | <i>HSPA1L</i>    | -2.374 | 50  | 112 | 2.10E-04 |
| cg20716209 | <i>STAT3</i>     | -4.283 | 64  | 98  | 2.10E-04 |
| cg05621401 | <i>RET</i>       | -3.589 | 92  | 70  | 2.10E-04 |
| cg11631518 | <i>KCNC2</i>     | -3.084 | 33  | 129 | 2.10E-04 |
| cg08351105 | <i>FOSL2</i>     | -5.451 | 34  | 128 | 2.11E-04 |
| cg11823654 | <i>C15orf20</i>  | -4.929 | 98  | 64  | 2.11E-04 |
| cg17718302 | <i>HIST1H3J</i>  | -4.914 | 110 | 52  | 2.11E-04 |
| cg18058949 | <i>NUP133</i>    | -4.625 | 116 | 46  | 2.11E-04 |
| cg14106632 | <i>EVI5L</i>     | -3.317 | 82  | 80  | 2.11E-04 |
| cg13615396 | <i>RACGAP1</i>   | -4.709 | 64  | 98  | 2.11E-04 |
| cg14951734 | <i>FLJ40432</i>  | -5.648 | 55  | 107 | 2.11E-04 |
| cg15799959 | <i>ZNF248</i>    | -5.046 | 91  | 71  | 2.11E-04 |
| cg19182046 | <i>C14orf111</i> | -4.359 | 100 | 62  | 2.11E-04 |
| cg11697652 | <i>ATF7IP</i>    | -4.520 | 42  | 120 | 2.11E-04 |
| cg03777405 | <i>NFE2L1</i>    | -4.031 | 66  | 96  | 2.11E-04 |
| cg21053748 | <i>NDUFA4</i>    | -4.978 | 114 | 48  | 2.12E-04 |
| cg21830413 | <i>VPS26</i>     | -4.998 | 46  | 116 | 2.12E-04 |
| cg14519036 | <i>TNKS2</i>     | -5.197 | 49  | 113 | 2.12E-04 |
| cg15157837 | <i>CNNM3</i>     | -5.452 | 49  | 113 | 2.12E-04 |
| cg11959821 | <i>TBRG4</i>     | -5.186 | 101 | 61  | 2.12E-04 |
| cg06585108 | <i>C10orf92</i>  | 3.162  | 80  | 82  | 2.12E-04 |

|            |          |        |     |     |          |
|------------|----------|--------|-----|-----|----------|
| cg10709021 | WRN      | -1.802 | 117 | 45  | 2.12E-04 |
| cg20975478 | CCDC24   | -3.302 | 84  | 78  | 2.12E-04 |
| cg06058597 | NOL10    | -5.503 | 57  | 105 | 2.13E-04 |
| cg18946802 | XPC      | -5.412 | 87  | 75  | 2.13E-04 |
| cg22892237 | DPY19L3  | -4.496 | 79  | 83  | 2.13E-04 |
| cg19017193 | ZNF161   | -4.552 | 97  | 65  | 2.13E-04 |
| cg11620873 | CD9      | -4.567 | 57  | 105 | 2.13E-04 |
| cg00402366 | LRRC44   | -5.106 | 64  | 98  | 2.13E-04 |
| cg01932215 | MGC4268  | -6.138 | 56  | 106 | 2.13E-04 |
| cg22122449 | ACR      | 1.597  | 110 | 52  | 2.13E-04 |
| cg07033083 | NSUN5C   | -2.225 | 88  | 74  | 2.13E-04 |
| cg02205739 | PRRX2    | -4.897 | 56  | 106 | 2.13E-04 |
| cg02691091 | SP2      | 2.683  | 38  | 124 | 2.14E-04 |
| cg14298780 | ZNF230   | -5.722 | 79  | 83  | 2.14E-04 |
| cg16550324 | GMD5     | -5.584 | 83  | 79  | 2.14E-04 |
| cg24607535 | CDH26    | 2.215  | 47  | 115 | 2.14E-04 |
| cg19046959 | COL8A2   | -2.922 | 64  | 98  | 2.14E-04 |
| cg07006526 | SMTN     | -6.177 | 64  | 98  | 2.14E-04 |
| cg16977257 | PRND     | -4.546 | 87  | 75  | 2.14E-04 |
| cg07357256 | MRPS26   | -5.213 | 94  | 68  | 2.14E-04 |
| cg13926569 | PAPSS2   | 1.977  | 68  | 94  | 2.14E-04 |
| cg21784498 | TMEM97   | -5.941 | 56  | 106 | 2.14E-04 |
| cg19390148 | DDA1     | -5.467 | 120 | 42  | 2.15E-04 |
| cg05103623 | TAGAP    | -3.433 | 140 | 22  | 2.15E-04 |
| cg10957680 | G1P3     | -4.956 | 107 | 55  | 2.15E-04 |
| cg08847038 | C10orf63 | -4.382 | 92  | 70  | 2.15E-04 |
| cg07099407 | KLC4     | -2.586 | 54  | 108 | 2.15E-04 |
| cg01177524 | NEDD9    | -4.950 | 48  | 114 | 2.15E-04 |
| cg21774863 | RAB28    | -5.039 | 76  | 86  | 2.15E-04 |
| cg09785172 | WFS1     | -5.249 | 71  | 91  | 2.15E-04 |
| cg02157306 | ELMOD2   | -4.505 | 67  | 95  | 2.15E-04 |
| cg06073471 | FAM55C   | -4.970 | 84  | 78  | 2.16E-04 |
| cg01515426 | ANAPC11  | -5.128 | 46  | 116 | 2.16E-04 |
| cg20999934 | NFX1     | -4.327 | 65  | 97  | 2.16E-04 |
| cg19063397 | POLD1    | -3.174 | 78  | 84  | 2.16E-04 |
| cg08113913 | CCDC74B  | -4.636 | 62  | 100 | 2.17E-04 |
| cg17630833 | MAPT     | -5.155 | 97  | 65  | 2.17E-04 |
| cg12541591 | TGFB2    | -4.025 | 36  | 126 | 2.17E-04 |
| cg11680158 | C9orf52  | -3.794 | 55  | 107 | 2.17E-04 |
| cg24257768 | C10orf84 | -4.177 | 90  | 72  | 2.17E-04 |
| cg15781625 | UCK2     | -5.209 | 91  | 71  | 2.17E-04 |
| cg26718585 | PROC     | 2.046  | 63  | 99  | 2.18E-04 |
| cg03059528 | RNF146   | -4.709 | 87  | 75  | 2.18E-04 |
| cg04224968 | C19orf36 | -3.903 | 84  | 78  | 2.18E-04 |
| cg04444771 | C10orf10 | -3.298 | 124 | 38  | 2.18E-04 |
| cg25716871 | MAPKAPK3 | -4.964 | 77  | 85  | 2.18E-04 |
| cg26929490 | NIPBL    | -6.333 | 81  | 81  | 2.18E-04 |
| cg09006267 | ACAT1    | -4.937 | 85  | 77  | 2.18E-04 |
| cg14201417 | ADAMTSL2 | -3.891 | 71  | 91  | 2.18E-04 |
| cg08576197 | CCDC57   | -4.914 | 56  | 106 | 2.19E-04 |
| cg12970008 | OSBPL5   | -3.948 | 108 | 54  | 2.19E-04 |
| cg10053203 | NIT1     | -4.121 | 45  | 117 | 2.19E-04 |
| cg22807551 | MTUS1    | -3.869 | 101 | 61  | 2.19E-04 |
| cg17226343 | DIRAS1   | -4.071 | 86  | 76  | 2.19E-04 |
| cg19413110 | POLR3GL  | -3.734 | 83  | 79  | 2.20E-04 |

|            |                  |        |     |     |          |
|------------|------------------|--------|-----|-----|----------|
| cg18796520 | <i>NDUFA9</i>    | -5.054 | 99  | 63  | 2.20E-04 |
| cg05144089 | <i>TOMM20</i>    | -4.368 | 60  | 102 | 2.20E-04 |
| cg21250577 | <i>ETFA</i>      | -4.852 | 114 | 48  | 2.20E-04 |
| cg09788239 | <i>PCQAP</i>     | -4.713 | 91  | 71  | 2.20E-04 |
| cg10490196 | <i>TPCN2</i>     | -5.948 | 65  | 97  | 2.21E-04 |
| cg08064891 | <i>PTOV1</i>     | -4.451 | 43  | 119 | 2.21E-04 |
| cg15045441 | <i>C6orf155</i>  | -4.413 | 126 | 36  | 2.21E-04 |
| cg23221122 | <i>DUSP10</i>    | -5.010 | 33  | 129 | 2.21E-04 |
| cg27470406 | <i>FBXL14</i>    | -5.665 | 42  | 120 | 2.21E-04 |
| cg16574065 | <i>RAD52B</i>    | -4.339 | 80  | 82  | 2.21E-04 |
| cg12867448 | <i>ODF2</i>      | 1.973  | 139 | 23  | 2.22E-04 |
| cg00497251 | <i>RNPEPL1</i>   | -3.466 | 66  | 96  | 2.22E-04 |
| cg05919661 | <i>LMBR1L</i>    | -4.882 | 88  | 74  | 2.22E-04 |
| cg11553177 | <i>SDF2</i>      | -5.773 | 59  | 103 | 2.22E-04 |
| cg14840416 | <i>ZFP36L2</i>   | -4.609 | 63  | 99  | 2.22E-04 |
| cg19445598 | <i>UBE1L2</i>    | -5.622 | 85  | 77  | 2.22E-04 |
| cg21264207 | <i>EGR2</i>      | -4.896 | 82  | 80  | 2.22E-04 |
| cg01107741 | <i>CANT1</i>     | -4.063 | 54  | 108 | 2.22E-04 |
| cg03081134 | <i>RECK</i>      | -4.491 | 116 | 46  | 2.22E-04 |
| cg12806381 | <i>PIGV</i>      | -4.543 | 86  | 76  | 2.22E-04 |
| cg14987922 | <i>STRN</i>      | -5.337 | 89  | 73  | 2.22E-04 |
| cg01141769 | <i>USP25</i>     | -5.039 | 58  | 104 | 2.23E-04 |
| cg09964005 | <i>GTPBP1</i>    | -6.241 | 56  | 106 | 2.23E-04 |
| cg13912204 | <i>SLC19A2</i>   | -5.289 | 45  | 117 | 2.23E-04 |
| cg18907029 | <i>SYNGR2</i>    | -5.220 | 92  | 70  | 2.23E-04 |
| cg10383839 | <i>LAPTM4A</i>   | -6.246 | 56  | 106 | 2.23E-04 |
| cg21359747 | <i>ALDH1A3</i>   | -3.591 | 65  | 97  | 2.23E-04 |
| cg22182110 | <i>GOLGB1</i>    | -3.745 | 76  | 86  | 2.24E-04 |
| cg20166532 | <i>EDG1</i>      | -4.007 | 77  | 85  | 2.24E-04 |
| cg27091703 | <i>RAD54B</i>    | -4.000 | 64  | 98  | 2.24E-04 |
| cg05051316 | <i>TMED1</i>     | -5.834 | 75  | 87  | 2.24E-04 |
| cg01994328 | <i>MAP3K8</i>    | -5.936 | 55  | 107 | 2.25E-04 |
| cg14059729 | <i>LOC129285</i> | -5.590 | 40  | 122 | 2.25E-04 |
| cg17554194 | <i>HLA-B</i>     | -4.112 | 64  | 98  | 2.25E-04 |
| cg20865068 | <i>TM9SF2</i>    | -5.093 | 47  | 115 | 2.25E-04 |
| cg00156216 | <i>APLP2</i>     | -5.237 | 63  | 99  | 2.25E-04 |
| cg18219951 | <i>GABRG2</i>    | -4.347 | 109 | 53  | 2.25E-04 |
| cg23166362 | <i>PIK3CD</i>    | -5.074 | 57  | 105 | 2.25E-04 |
| cg16688911 | <i>VASP</i>      | -5.608 | 100 | 62  | 2.25E-04 |
| cg14260643 | <i>CYP3A5</i>    | -1.238 | 85  | 77  | 2.25E-04 |
| cg16740543 | <i>PHF10</i>     | -5.569 | 96  | 66  | 2.25E-04 |
| cg26454191 | <i>PMS1</i>      | -4.664 | 78  | 84  | 2.25E-04 |
| cg09163021 | <i>RAPSN</i>     | 0.854  | 65  | 97  | 2.25E-04 |
| cg08693206 | <i>AP1B1</i>     | -5.862 | 105 | 57  | 2.26E-04 |
| cg21973800 | <i>CINP</i>      | -5.138 | 100 | 62  | 2.26E-04 |
| cg08395706 | <i>ZNF646</i>    | -4.988 | 81  | 81  | 2.26E-04 |
| cg11063988 | <i>SIX5</i>      | -6.382 | 64  | 98  | 2.26E-04 |
| cg24231716 | <i>OTP</i>       | -2.436 | 38  | 124 | 2.26E-04 |
| cg12795208 | <i>KRT6B</i>     | 2.505  | 101 | 61  | 2.27E-04 |
| cg24269846 | <i>PRIM1</i>     | -6.033 | 58  | 104 | 2.27E-04 |
| cg09182986 | <i>CAP1</i>      | -4.510 | 104 | 58  | 2.27E-04 |
| cg06679221 | <i>THUMPD3</i>   | -5.056 | 117 | 45  | 2.27E-04 |
| cg08699435 | <i>NAT5</i>      | -4.374 | 58  | 104 | 2.27E-04 |
| cg24435704 | <i>PARP12</i>    | 3.080  | 109 | 53  | 2.28E-04 |
| cg03391040 | <i>ZNF420</i>    | -5.976 | 99  | 63  | 2.28E-04 |

|            |                  |        |     |     |          |
|------------|------------------|--------|-----|-----|----------|
| cg18712119 | <i>TNFAIP1</i>   | -4.943 | 50  | 112 | 2.28E-04 |
| cg05575043 | <i>ZNF394</i>    | -5.108 | 87  | 75  | 2.28E-04 |
| cg05366401 | <i>TM9SF1</i>    | -6.212 | 75  | 87  | 2.28E-04 |
| cg01465641 | <i>ITSN1</i>     | -3.378 | 35  | 127 | 2.28E-04 |
| cg22730357 | <i>PTPN4</i>     | -5.667 | 99  | 63  | 2.28E-04 |
| cg23051664 | <i>TNFRSF10D</i> | -4.013 | 86  | 76  | 2.28E-04 |
| cg13057891 | <i>ERCC5</i>     | -5.626 | 101 | 61  | 2.28E-04 |
| cg01663968 | <i>CTSZ</i>      | -4.574 | 120 | 42  | 2.29E-04 |
| cg25501446 | <i>CDC2</i>      | 1.202  | 31  | 131 | 2.29E-04 |
| cg11879514 | <i>SLC16A6</i>   | -3.413 | 54  | 108 | 2.29E-04 |
| cg17150465 | <i>SCRIB</i>     | -6.332 | 75  | 87  | 2.29E-04 |
| cg07639959 | <i>EXO1</i>      | -5.254 | 54  | 108 | 2.29E-04 |
| cg14844130 | <i>VPREB1</i>    | -2.305 | 94  | 68  | 2.29E-04 |
| cg01048931 | <i>ECOP</i>      | -4.567 | 54  | 108 | 2.29E-04 |
| cg22369818 | <i>GABPB2</i>    | -5.214 | 56  | 106 | 2.29E-04 |
| cg04960951 | <i>SUV420H2</i>  | -5.366 | 102 | 60  | 2.29E-04 |
| cg07886712 | <i>RHBDD3</i>    | -2.278 | 35  | 127 | 2.29E-04 |
| cg26791659 | <i>GPSM3</i>     | -3.908 | 96  | 66  | 2.29E-04 |
| cg27016990 | <i>KCNQ3</i>     | -6.158 | 101 | 61  | 2.29E-04 |
| cg18719814 | <i>NFXL1</i>     | -5.345 | 43  | 119 | 2.30E-04 |
| cg17408647 | <i>FLJ10803</i>  | -4.642 | 51  | 111 | 2.30E-04 |
| cg19496782 | <i>GATA6</i>     | -3.103 | 64  | 98  | 2.30E-04 |
| cg05467167 | <i>GOSR2</i>     | -4.189 | 97  | 65  | 2.30E-04 |
| cg23941599 | <i>FEM1C</i>     | -2.398 | 76  | 86  | 2.30E-04 |
| cg02039171 | <i>CEBPE</i>     | 1.686  | 93  | 69  | 2.30E-04 |
| cg01513611 | <i>NDUFA11</i>   | -4.296 | 90  | 72  | 2.30E-04 |
| cg19020694 | <i>C12orf24</i>  | -4.817 | 72  | 90  | 2.30E-04 |
| cg27028749 | <i>ABT1</i>      | -4.773 | 37  | 125 | 2.31E-04 |
| cg19569684 | <i>PACAP</i>     | 2.336  | 78  | 84  | 2.31E-04 |
| cg09052983 | <i>RAB27B</i>    | -4.333 | 86  | 76  | 2.31E-04 |
| cg17895873 | <i>SMYD5</i>     | -5.483 | 79  | 83  | 2.31E-04 |
| cg22482381 | <i>MGEA5</i>     | -5.388 | 105 | 57  | 2.31E-04 |
| cg16208271 | <i>ENTPD6</i>    | -4.711 | 104 | 58  | 2.31E-04 |
| cg14550101 | <i>HCN3</i>      | -5.366 | 95  | 67  | 2.31E-04 |
| cg06111305 | <i>RAP2A</i>     | -5.243 | 97  | 65  | 2.31E-04 |
| cg10457247 | <i>PRDM14</i>    | -3.290 | 85  | 77  | 2.32E-04 |
| cg03373442 | <i>HSPH1</i>     | -6.426 | 93  | 69  | 2.32E-04 |
| cg24023606 | <i>TDP1</i>      | -5.536 | 74  | 88  | 2.32E-04 |
| cg17009717 | <i>POLR1B</i>    | -3.247 | 114 | 48  | 2.32E-04 |
| cg21402071 | <i>CHRNA4</i>    | -1.819 | 81  | 81  | 2.32E-04 |
| cg25145670 | <i>HOXB4</i>     | -2.393 | 69  | 93  | 2.32E-04 |
| cg25659818 | <i>CCL4</i>      | 1.706  | 59  | 103 | 2.32E-04 |
| cg25759381 | <i>TSSK2</i>     | 2.269  | 73  | 89  | 2.32E-04 |
| cg21686523 | <i>PHF22</i>     | -5.243 | 53  | 109 | 2.32E-04 |
| cg18607470 | <i>KIAA0895</i>  | -5.902 | 80  | 82  | 2.33E-04 |
| cg19213569 | <i>FLJ10986</i>  | -4.113 | 65  | 97  | 2.33E-04 |
| cg10089324 | <i>EPS15</i>     | -3.006 | 85  | 77  | 2.33E-04 |
| cg24334983 | <i>ANXA11</i>    | -4.769 | 55  | 107 | 2.33E-04 |
| cg03157149 | <i>GDI2</i>      | -6.508 | 71  | 91  | 2.33E-04 |
| cg08107767 | <i>MRPS17</i>    | -5.577 | 119 | 43  | 2.33E-04 |
| cg17371067 | <i>CEBPB</i>     | -5.651 | 52  | 110 | 2.33E-04 |
| cg14060060 | <i>KIAA0251</i>  | -4.873 | 75  | 87  | 2.33E-04 |
| cg15056412 | <i>APBA2BP</i>   | -4.375 | 86  | 76  | 2.33E-04 |
| cg16241714 | <i>CEBPD</i>     | -5.921 | 65  | 97  | 2.34E-04 |
| cg06252849 | <i>AGGF1</i>     | -3.948 | 96  | 66  | 2.34E-04 |

|            |           |        |     |     |          |
|------------|-----------|--------|-----|-----|----------|
| cg02946754 | NHLRC2    | -5.040 | 46  | 116 | 2.34E-04 |
| cg21369679 | DNAJA2    | -4.860 | 66  | 96  | 2.34E-04 |
| cg22136326 | ARL2BP    | -5.418 | 39  | 123 | 2.34E-04 |
| cg00214346 | PRKAR1A   | -5.700 | 96  | 66  | 2.34E-04 |
| cg09147213 | HOMER1    | -3.803 | 80  | 82  | 2.35E-04 |
| cg19584823 | KLHDC2    | -4.783 | 96  | 66  | 2.35E-04 |
| cg04060275 | DUSP1     | -5.421 | 71  | 91  | 2.36E-04 |
| cg03212129 | MGC13096  | -5.179 | 109 | 53  | 2.36E-04 |
| cg00979348 | HPSE      | -3.910 | 29  | 133 | 2.36E-04 |
| cg04011402 | FIS       | 1.215  | 96  | 66  | 2.37E-04 |
| cg00995327 | CHST2     | -3.569 | 78  | 84  | 2.37E-04 |
| cg21547976 | STK11     | -4.986 | 61  | 101 | 2.37E-04 |
| cg21038964 | DPM3      | -4.310 | 71  | 91  | 2.37E-04 |
| cg05847778 | BBS5      | -5.554 | 61  | 101 | 2.37E-04 |
| cg18576883 | ZNF639    | -5.786 | 75  | 87  | 2.37E-04 |
| cg22552669 | SSSCA1    | -4.899 | 93  | 69  | 2.37E-04 |
| cg11898695 | PTCRA     | 1.767  | 58  | 104 | 2.37E-04 |
| cg20557037 | COBLL1    | -4.226 | 85  | 77  | 2.37E-04 |
| cg22960501 | IKBKB     | -5.333 | 44  | 118 | 2.37E-04 |
| cg23657409 | PLCB1     | -4.141 | 130 | 32  | 2.37E-04 |
| cg20360244 | SLC35E3   | -5.092 | 70  | 92  | 2.37E-04 |
| cg16107553 | PPP2R5E   | -4.969 | 89  | 73  | 2.38E-04 |
| cg17935677 | WDR76     | -5.584 | 44  | 118 | 2.38E-04 |
| cg23029494 | BCL2L12   | -4.178 | 94  | 68  | 2.38E-04 |
| cg09896445 | GPC5      | -4.897 | 52  | 110 | 2.38E-04 |
| cg27523951 | COG3      | -4.913 | 65  | 97  | 2.38E-04 |
| cg14341030 | C12orf60  | -5.528 | 68  | 94  | 2.38E-04 |
| cg24568646 | CCT8      | -4.696 | 126 | 36  | 2.38E-04 |
| cg24219638 | STX3A     | -5.993 | 63  | 99  | 2.39E-04 |
| cg25125453 | C20orf38  | -1.824 | 56  | 106 | 2.39E-04 |
| cg19398446 | NUDT2     | -5.478 | 100 | 62  | 2.39E-04 |
| cg25060020 | SERTAD1   | -5.230 | 118 | 44  | 2.39E-04 |
| cg01918888 | RLF       | -4.149 | 39  | 123 | 2.39E-04 |
| cg10222574 | RAB11FIP2 | -4.989 | 42  | 120 | 2.39E-04 |
| cg14532417 | TBC1D3    | 1.874  | 64  | 98  | 2.39E-04 |
| cg19358493 | EMX2      | -3.564 | 87  | 75  | 2.39E-04 |
| cg10125119 | CSDE1     | -3.899 | 71  | 91  | 2.40E-04 |
| cg04755933 | AUP1      | -4.451 | 101 | 61  | 2.40E-04 |
| cg21091679 | ELL2      | -4.332 | 106 | 56  | 2.40E-04 |
| cg23820285 | PIP5K2A   | -6.223 | 62  | 100 | 2.40E-04 |
| cg24705286 | JMJD5     | -6.171 | 95  | 67  | 2.40E-04 |
| cg25425078 | CCND2     | -4.927 | 94  | 68  | 2.40E-04 |
| cg25458920 | EIF2AK2   | -4.179 | 81  | 81  | 2.40E-04 |
| cg17648620 | EFHC1     | -3.800 | 55  | 107 | 2.41E-04 |
| cg05518543 | MAEA      | -4.194 | 55  | 107 | 2.41E-04 |
| cg09311052 | UBE2Q1    | -5.947 | 70  | 92  | 2.42E-04 |
| cg16208448 | TPP2      | -3.123 | 83  | 79  | 2.42E-04 |
| cg08635249 | RBM28     | -4.827 | 44  | 118 | 2.42E-04 |
| cg16852892 | MMP16     | -5.149 | 82  | 80  | 2.42E-04 |
| cg20286200 | EYA4      | -3.179 | 121 | 41  | 2.42E-04 |
| cg19229809 | ZNF267    | -5.090 | 86  | 76  | 2.42E-04 |
| cg22328890 | SLC7A6    | -5.106 | 76  | 86  | 2.42E-04 |
| cg05741384 | ODC1      | -4.407 | 79  | 83  | 2.43E-04 |
| cg10458876 | PSKH1     | -3.278 | 66  | 96  | 2.43E-04 |
| cg12838902 | SLC29A4   | 0.043  | 61  | 101 | 2.43E-04 |

|            |                  |        |     |     |          |
|------------|------------------|--------|-----|-----|----------|
| cg18627852 | <i>SNRPF</i>     | -5.408 | 42  | 120 | 2.43E-04 |
| cg20053799 | <i>PSCD2</i>     | -5.215 | 50  | 112 | 2.43E-04 |
| cg11054882 | <i>TRAPPC4</i>   | -3.504 | 78  | 84  | 2.43E-04 |
| cg02628930 | <i>KLHL8</i>     | -5.836 | 65  | 96  | 2.44E-04 |
| cg04229238 | <i>RB1CC1</i>    | -4.621 | 95  | 67  | 2.44E-04 |
| cg16933388 | <i>BSN</i>       | -3.915 | 87  | 75  | 2.44E-04 |
| cg08724636 | <i>RALA</i>      | -6.025 | 52  | 110 | 2.44E-04 |
| cg10216105 | <i>TTL</i>       | -5.154 | 72  | 90  | 2.46E-04 |
| cg21644826 | <i>ACSM3</i>     | -3.539 | 103 | 59  | 2.46E-04 |
| cg22830590 | <i>SCRN3</i>     | -5.078 | 72  | 90  | 2.46E-04 |
| cg23222573 | <i>C20orf6</i>   | -5.485 | 63  | 99  | 2.47E-04 |
| cg17338403 | <i>SLCO3A1</i>   | -2.420 | 89  | 73  | 2.47E-04 |
| cg17803807 | <i>PWWP2</i>     | -3.285 | 47  | 115 | 2.47E-04 |
| cg02398725 | <i>ZF</i>        | -4.408 | 80  | 82  | 2.47E-04 |
| cg16495265 | <i>HOXB5</i>     | -3.448 | 42  | 120 | 2.47E-04 |
| cg19357918 | <i>STIP1</i>     | -4.779 | 103 | 59  | 2.47E-04 |
| cg17877656 | <i>PCGF6</i>     | -4.640 | 80  | 82  | 2.48E-04 |
| cg11099291 | <i>MGC14376</i>  | -4.496 | 52  | 110 | 2.48E-04 |
| cg24687764 | <i>C16orf46</i>  | -4.150 | 106 | 56  | 2.48E-04 |
| cg18459342 | <i>TPD52</i>     | -1.870 | 73  | 89  | 2.48E-04 |
| cg15729423 | <i>ZADH1</i>     | -4.824 | 89  | 73  | 2.48E-04 |
| cg15348799 | <i>SKIL</i>      | -5.029 | 86  | 76  | 2.48E-04 |
| cg05244766 | <i>GSTP1</i>     | 2.289  | 23  | 139 | 2.49E-04 |
| cg17868994 | <i>NIPSNAP3B</i> | -4.382 | 82  | 80  | 2.49E-04 |
| cg11946769 | <i>NME6</i>      | -5.824 | 54  | 108 | 2.49E-04 |
| cg12237946 | <i>PGBD4</i>     | -1.977 | 63  | 99  | 2.49E-04 |
| cg06894812 | <i>MCC</i>       | -4.491 | 40  | 122 | 2.49E-04 |
| cg08348962 | <i>C1orf32</i>   | -3.884 | 49  | 113 | 2.49E-04 |
| cg09694403 | <i>DHRS7</i>     | -6.129 | 87  | 75  | 2.49E-04 |
| cg20681975 | <i>TNRC5</i>     | -4.926 | 77  | 85  | 2.49E-04 |
| cg06848288 | <i>PHIP</i>      | -4.859 | 44  | 118 | 2.49E-04 |
| cg11871280 | <i>SLC16A7</i>   | 2.640  | 69  | 93  | 2.49E-04 |
| cg17617223 | <i>ZYG11BL</i>   | -5.482 | 81  | 81  | 2.50E-04 |
| cg01401337 | <i>PHF2</i>      | -5.401 | 43  | 119 | 2.51E-04 |
| cg00040861 | <i>LSM7</i>      | -5.256 | 49  | 113 | 2.51E-04 |
| cg16218254 | <i>IMMP2L</i>    | -4.214 | 104 | 58  | 2.51E-04 |
| cg12059012 | <i>ABHD5</i>     | -5.444 | 67  | 95  | 2.51E-04 |
| cg07844021 | <i>COIL</i>      | -3.959 | 119 | 43  | 2.51E-04 |
| cg07774025 | <i>HSD17B7</i>   | -4.484 | 130 | 32  | 2.51E-04 |
| cg14147105 | <i>LOC93343</i>  | -4.235 | 89  | 73  | 2.51E-04 |
| cg01245595 | <i>LSS</i>       | -4.744 | 78  | 84  | 2.51E-04 |
| cg08721347 | <i>ALG14</i>     | -5.096 | 100 | 62  | 2.51E-04 |
| cg20091959 | <i>L3MBTL</i>    | 0.833  | 85  | 77  | 2.51E-04 |
| cg16711185 | <i>SHC4</i>      | -4.394 | 56  | 106 | 2.51E-04 |
| cg20979896 | <i>PDRG1</i>     | -5.161 | 53  | 109 | 2.52E-04 |
| cg05352541 | <i>PITPNB</i>    | -5.344 | 78  | 84  | 2.53E-04 |
| cg08242323 | <i>POLR2D</i>    | -4.458 | 110 | 52  | 2.53E-04 |
| cg14871856 | <i>GTF2E2</i>    | -5.680 | 72  | 90  | 2.53E-04 |
| cg15984612 | <i>BOP1</i>      | -4.539 | 65  | 97  | 2.53E-04 |
| cg19816938 | <i>ABR</i>       | -4.930 | 96  | 66  | 2.53E-04 |
| cg20052411 | <i>RCE1</i>      | -5.972 | 51  | 111 | 2.53E-04 |
| cg25159539 | <i>FEM1B</i>     | -4.905 | 57  | 105 | 2.54E-04 |
| cg26168975 | <i>C1orf80</i>   | -4.365 | 93  | 69  | 2.54E-04 |
| cg26354238 | <i>RQCD1</i>     | -3.784 | 92  | 70  | 2.54E-04 |
| cg00783759 | <i>LARP2</i>     | -5.849 | 81  | 81  | 2.54E-04 |

|            |                 |        |     |     |          |
|------------|-----------------|--------|-----|-----|----------|
| cg21529533 | <i>HLA-G</i>    | -4.347 | 88  | 74  | 2.54E-04 |
| cg17364922 | <i>YTHDF1</i>   | -4.992 | 86  | 76  | 2.54E-04 |
| cg22753607 | <i>ZCCHC7</i>   | -3.821 | 80  | 82  | 2.54E-04 |
| cg02978737 | <i>PVALB</i>    | 1.285  | 60  | 102 | 2.54E-04 |
| cg26297688 | <i>C12orf23</i> | -4.505 | 108 | 54  | 2.54E-04 |
| cg05566965 | <i>BID</i>      | -4.987 | 75  | 87  | 2.55E-04 |
| cg26124016 | <i>RARB</i>     | -3.454 | 103 | 59  | 2.55E-04 |
| cg27009631 | <i>FNDC3A</i>   | -5.981 | 104 | 58  | 2.55E-04 |
| cg00566759 | <i>DSC2</i>     | -3.983 | 84  | 78  | 2.55E-04 |
| cg07628086 | <i>AP2B1</i>    | -5.715 | 89  | 73  | 2.55E-04 |
| cg11251498 | <i>INDOL1</i>   | -1.072 | 60  | 102 | 2.55E-04 |
| cg13730534 | <i>NFYC</i>     | -3.989 | 63  | 99  | 2.55E-04 |
| cg24624819 | <i>LPIN1</i>    | -5.103 | 72  | 90  | 2.55E-04 |
| cg25141995 | <i>VDAC1</i>    | -0.705 | 141 | 21  | 2.56E-04 |
| cg00480209 | <i>C17orf48</i> | -5.277 | 90  | 72  | 2.57E-04 |
| cg13225039 | <i>TACC3</i>    | -3.470 | 110 | 52  | 2.57E-04 |
| cg26528713 | <i>TRUB1</i>    | -5.990 | 58  | 104 | 2.57E-04 |
| cg07535879 | <i>MTRF1L</i>   | -4.801 | 43  | 119 | 2.57E-04 |
| cg19154173 | <i>C12orf8</i>  | -5.412 | 63  | 99  | 2.57E-04 |
| cg01234063 | <i>ST3GAL4</i>  | -4.684 | 101 | 61  | 2.57E-04 |
| cg07294870 | <i>PIGT</i>     | -4.792 | 73  | 89  | 2.57E-04 |
| cg22573917 | <i>WNT1</i>     | -3.665 | 85  | 77  | 2.57E-04 |
| cg13210512 | <i>SPATA2</i>   | -4.089 | 51  | 111 | 2.57E-04 |
| cg10685945 | <i>HMFN0839</i> | -4.568 | 60  | 102 | 2.58E-04 |
| cg18795395 | <i>GNG12</i>    | -4.437 | 48  | 114 | 2.58E-04 |
| cg10575414 | <i>RTDR1</i>    | -4.603 | 47  | 115 | 2.58E-04 |
| cg14850026 | <i>ECAT11</i>   | 1.322  | 76  | 86  | 2.58E-04 |
| cg12534466 | <i>FLJ20551</i> | -4.981 | 66  | 96  | 2.58E-04 |
| cg12739647 | <i>SFT2D2</i>   | -5.574 | 48  | 114 | 2.59E-04 |
| cg13752043 | <i>CCBL1</i>    | -4.637 | 96  | 66  | 2.59E-04 |
| cg24514921 | <i>VPS54</i>    | -4.117 | 116 | 46  | 2.59E-04 |
| cg09926892 | <i>RNPC2</i>    | -4.983 | 66  | 96  | 2.59E-04 |
| cg16691616 | <i>INPP1</i>    | -4.774 | 100 | 62  | 2.59E-04 |
| cg00668685 | <i>SLC39A5</i>  | 2.646  | 96  | 66  | 2.60E-04 |
| cg21584983 | <i>SITPEC</i>   | -5.066 | 88  | 74  | 2.60E-04 |
| cg21715963 | <i>C1orf51</i>  | -4.771 | 116 | 46  | 2.60E-04 |
| cg24505375 | <i>AMAC1L2</i>  | 0.953  | 99  | 63  | 2.60E-04 |
| cg03648823 | <i>ZNF643</i>   | -4.863 | 55  | 106 | 2.60E-04 |
| cg07808960 | <i>RBM6</i>     | -6.098 | 63  | 99  | 2.61E-04 |
| cg08207256 | <i>DNM2</i>     | -2.219 | 72  | 90  | 2.61E-04 |
| cg03580351 | <i>FLJ40869</i> | -5.617 | 88  | 74  | 2.61E-04 |
| cg16280313 | <i>PEX16</i>    | -4.730 | 92  | 70  | 2.61E-04 |
| cg04865575 | <i>YME1L1</i>   | -5.695 | 52  | 110 | 2.61E-04 |
| cg06069187 | <i>SARM1</i>    | -2.751 | 77  | 82  | 2.61E-04 |
| cg00071998 | <i>MSH5</i>     | -4.267 | 113 | 49  | 2.61E-04 |
| cg11064797 | <i>C5orf16</i>  | -4.064 | 60  | 102 | 2.61E-04 |
| cg14777972 | <i>SEC10L1</i>  | -3.408 | 133 | 29  | 2.61E-04 |
| cg15996947 | <i>L2HGDH</i>   | 2.025  | 83  | 79  | 2.61E-04 |
| cg19676312 | <i>RNPEP</i>    | -4.217 | 102 | 60  | 2.62E-04 |
| cg01914242 | <i>ATP2A3</i>   | -4.760 | 33  | 129 | 2.62E-04 |
| cg20096208 | <i>JMJD2D</i>   | -4.764 | 35  | 127 | 2.62E-04 |
| cg25282780 | <i>AK3</i>      | -3.587 | 50  | 112 | 2.63E-04 |
| cg08011328 | <i>BYSL</i>     | -5.078 | 66  | 96  | 2.63E-04 |
| cg24030425 | <i>PEX1</i>     | -3.923 | 83  | 79  | 2.63E-04 |
| cg10894102 | <i>CLIC4</i>    | -4.533 | 80  | 82  | 2.63E-04 |

|            |                  |        |     |     |          |
|------------|------------------|--------|-----|-----|----------|
| cg09160477 | <i>SUSD3</i>     | -5.129 | 85  | 77  | 2.63E-04 |
| cg02360616 | <i>C1orf24</i>   | -5.504 | 46  | 116 | 2.64E-04 |
| cg15979098 | <i>ZNF615</i>    | -4.919 | 56  | 106 | 2.64E-04 |
| cg13547299 | <i>TOLLIP</i>    | -5.066 | 81  | 81  | 2.64E-04 |
| cg07714374 | <i>TCF4</i>      | -2.234 | 55  | 107 | 2.64E-04 |
| cg16124821 | <i>ZNF706</i>    | -4.672 | 70  | 92  | 2.64E-04 |
| cg18113787 | <i>CRSP6</i>     | -5.051 | 75  | 87  | 2.64E-04 |
| cg26884154 | <i>STXBP2</i>    | -3.828 | 93  | 69  | 2.65E-04 |
| cg19540408 | <i>MGC35154</i>  | 0.909  | 105 | 57  | 2.65E-04 |
| cg00512374 | <i>IGFBP4</i>    | -4.725 | 94  | 68  | 2.65E-04 |
| cg07711097 | <i>GML</i>       | 2.492  | 41  | 121 | 2.65E-04 |
| cg04454259 | <i>CBR3</i>      | -4.759 | 70  | 92  | 2.65E-04 |
| cg19988449 | <i>BNC1</i>      | -2.926 | 94  | 68  | 2.65E-04 |
| cg11655691 | <i>CBARA1</i>    | -4.404 | 100 | 62  | 2.66E-04 |
| cg21850239 | <i>POLR2G</i>    | -5.341 | 83  | 79  | 2.66E-04 |
| cg11023442 | <i>SKIP</i>      | -5.123 | 77  | 85  | 2.67E-04 |
| cg01449415 | <i>ZNF213</i>    | -5.602 | 71  | 91  | 2.67E-04 |
| cg04884732 | <i>MTERFD2</i>   | -4.470 | 90  | 72  | 2.67E-04 |
| cg03890877 | <i>PTK9L</i>     | -4.774 | 72  | 90  | 2.67E-04 |
| cg13421924 | <i>SC5DL</i>     | -4.287 | 39  | 123 | 2.67E-04 |
| cg07775501 | <i>JOSD2</i>     | -5.150 | 33  | 129 | 2.67E-04 |
| cg11879480 | <i>SLC36A4</i>   | -3.806 | 114 | 48  | 2.68E-04 |
| cg10573763 | <i>COPE</i>      | -5.656 | 99  | 63  | 2.68E-04 |
| cg10458581 | <i>QP-C</i>      | -5.836 | 55  | 107 | 2.68E-04 |
| cg07022885 | <i>FLJ32675</i>  | -5.104 | 45  | 117 | 2.68E-04 |
| cg12792366 | <i>LRRFIP2</i>   | -5.261 | 62  | 100 | 2.68E-04 |
| cg16597172 | <i>MYCN</i>      | -5.246 | 78  | 84  | 2.68E-04 |
| cg22788223 | <i>NFYA</i>      | -5.513 | 54  | 108 | 2.68E-04 |
| cg26475085 | <i>OSMR</i>      | -4.905 | 82  | 80  | 2.68E-04 |
| cg19436567 | <i>ARID1B</i>    | -2.969 | 47  | 115 | 2.69E-04 |
| cg19906397 | <i>SMARCB1</i>   | -4.645 | 77  | 85  | 2.69E-04 |
| cg22998811 | <i>ZNF563</i>    | -5.046 | 85  | 77  | 2.69E-04 |
| cg08717396 | <i>HIST1H2AG</i> | -3.826 | 59  | 103 | 2.69E-04 |
| cg01797043 | <i>RPL3L</i>     | 0.459  | 73  | 89  | 2.69E-04 |
| cg15937081 | <i>C14orf106</i> | -3.917 | 62  | 100 | 2.69E-04 |
| cg26358059 | <i>GSTO1</i>     | -5.547 | 75  | 87  | 2.70E-04 |
| cg05658858 | <i>TUBGCP2</i>   | -5.640 | 92  | 70  | 2.70E-04 |
| cg04137037 | <i>TEF</i>       | -5.968 | 84  | 78  | 2.70E-04 |
| cg21516478 | <i>GPX3</i>      | -3.449 | 99  | 63  | 2.70E-04 |
| cg25536300 | <i>PTBP1</i>     | -6.615 | 69  | 93  | 2.70E-04 |
| cg24946408 | <i>PPP1R15A</i>  | -5.537 | 63  | 99  | 2.71E-04 |
| cg16400825 | <i>ITPR3</i>     | -4.783 | 92  | 70  | 2.71E-04 |
| cg14455487 | <i>FOXJ3</i>     | -2.680 | 39  | 123 | 2.71E-04 |
| cg23772557 | <i>USP16</i>     | -5.342 | 40  | 122 | 2.71E-04 |
| cg16004800 | <i>NDUFA9</i>    | -4.104 | 37  | 125 | 2.71E-04 |
| cg12379775 | <i>LOC284739</i> | -4.318 | 89  | 73  | 2.71E-04 |
| cg02770814 | <i>C5orf5</i>    | -5.198 | 50  | 112 | 2.71E-04 |
| cg04333463 | <i>ASPH</i>      | -4.612 | 84  | 78  | 2.71E-04 |
| cg05091653 | <i>SP100</i>     | -2.674 | 67  | 95  | 2.71E-04 |
| cg07318658 | <i>MTMR4</i>     | -4.077 | 110 | 52  | 2.71E-04 |
| cg09872934 | <i>SGK</i>       | -4.795 | 79  | 83  | 2.71E-04 |
| cg16786703 | <i>ADAM8</i>     | -4.953 | 99  | 63  | 2.71E-04 |
| cg24448231 | <i>ZNFX1</i>     | -4.317 | 61  | 101 | 2.71E-04 |
| cg03327494 | <i>ZDHHC19</i>   | 1.900  | 144 | 18  | 2.71E-04 |
| cg12556991 | <i>RPL27</i>     | -4.579 | 87  | 75  | 2.71E-04 |

|            |                 |        |     |     |          |
|------------|-----------------|--------|-----|-----|----------|
| cg13382714 | <i>AP4S1</i>    | -5.209 | 75  | 87  | 2.71E-04 |
| cg04314463 | <i>PNKP</i>     | -4.376 | 58  | 104 | 2.71E-04 |
| cg02479196 | <i>43897</i>    | -5.143 | 58  | 104 | 2.72E-04 |
| cg08393006 | <i>SFRS14</i>   | -3.815 | 56  | 106 | 2.72E-04 |
| cg15676488 | <i>SNRPC</i>    | -3.954 | 54  | 108 | 2.72E-04 |
| cg14345882 | <i>BTN3A2</i>   | -0.324 | 94  | 68  | 2.72E-04 |
| cg04341084 | <i>TPD52</i>    | -5.125 | 49  | 113 | 2.72E-04 |
| cg10057065 | <i>C1orf104</i> | -2.241 | 110 | 52  | 2.72E-04 |
| cg17109273 | <i>TINF2</i>    | -6.089 | 99  | 63  | 2.73E-04 |
| cg00611397 | <i>GTPBP5</i>   | 2.502  | 72  | 90  | 2.73E-04 |
| cg01069256 | <i>C8orf70</i>  | -4.879 | 108 | 54  | 2.73E-04 |
| cg04109220 | <i>SPAG8</i>    | -4.913 | 62  | 100 | 2.73E-04 |
| cg23104955 | <i>RPL7</i>     | -5.449 | 36  | 126 | 2.73E-04 |
| cg27225570 | <i>DUSP15</i>   | -6.160 | 76  | 86  | 2.73E-04 |
| cg12118011 | <i>SOAT1</i>    | -4.101 | 93  | 69  | 2.73E-04 |
| cg14060836 | <i>HBLD2</i>    | -6.110 | 78  | 84  | 2.73E-04 |
| cg14242042 | <i>SOX5</i>     | -5.932 | 97  | 65  | 2.73E-04 |
| cg20482071 | <i>HEXB</i>     | -6.367 | 44  | 118 | 2.73E-04 |
| cg26488636 | <i>TALDO1</i>   | -4.255 | 57  | 105 | 2.73E-04 |
| cg13051968 | <i>RNF144</i>   | -6.621 | 60  | 102 | 2.73E-04 |
| cg26869604 | <i>LRRC20</i>   | -4.727 | 49  | 113 | 2.73E-04 |
| cg05205664 | <i>UCP2</i>     | -4.782 | 59  | 103 | 2.74E-04 |
| cg05027081 | <i>CDC7</i>     | -5.609 | 90  | 72  | 2.74E-04 |
| cg22467216 | <i>TUBB6</i>    | -5.499 | 41  | 121 | 2.74E-04 |
| cg08453968 | <i>NXT1</i>     | -5.192 | 65  | 97  | 2.74E-04 |
| cg10073875 | <i>GEMIN7</i>   | -5.208 | 115 | 47  | 2.74E-04 |
| cg13173909 | <i>UGCGL1</i>   | -6.311 | 73  | 89  | 2.74E-04 |
| cg23631636 | <i>RPL37A</i>   | -5.712 | 77  | 85  | 2.75E-04 |
| cg02712845 | <i>DPAGT1</i>   | -5.078 | 86  | 76  | 2.75E-04 |
| cg03080344 | <i>METTL2B</i>  | -4.314 | 79  | 83  | 2.75E-04 |
| cg06746101 | <i>TMED3</i>    | -5.491 | 75  | 87  | 2.75E-04 |
| cg01092036 | <i>MMP8</i>     | 3.071  | 79  | 83  | 2.75E-04 |
| cg22459930 | <i>TXNL5</i>    | -4.547 | 83  | 79  | 2.75E-04 |
| cg24573310 | <i>C10orf70</i> | -5.158 | 49  | 113 | 2.75E-04 |
| cg17530977 | <i>GLI3</i>     | -4.629 | 73  | 89  | 2.75E-04 |
| cg13798579 | <i>ANAPC13</i>  | -4.618 | 48  | 114 | 2.75E-04 |
| cg13750354 | <i>OCIAD1</i>   | -4.637 | 87  | 75  | 2.76E-04 |
| cg07739803 | <i>SLC30A7</i>  | -5.723 | 55  | 107 | 2.76E-04 |
| cg00810495 | <i>BXDC5</i>    | -4.031 | 104 | 58  | 2.76E-04 |
| cg15416233 | <i>PAX2</i>     | -5.643 | 100 | 62  | 2.76E-04 |
| cg11526405 | <i>SH3GLB2</i>  | -4.221 | 62  | 100 | 2.77E-04 |
| cg06792911 | <i>SLC2A1</i>   | -5.454 | 87  | 75  | 2.77E-04 |
| cg25737491 | <i>GABARAP</i>  | -4.565 | 51  | 111 | 2.77E-04 |
| cg24747122 | <i>GNA13</i>    | -0.202 | 35  | 127 | 2.77E-04 |
| cg13932624 | <i>TBRG1</i>    | -5.989 | 92  | 70  | 2.77E-04 |
| cg23610018 | <i>VGLL4</i>    | -6.519 | 82  | 80  | 2.77E-04 |
| cg26001030 | <i>RABGAP1L</i> | -5.099 | 53  | 109 | 2.78E-04 |
| cg22885965 | <i>QRSL1</i>    | -5.216 | 113 | 49  | 2.78E-04 |
| cg25361844 | <i>SIPA1</i>    | -4.879 | 59  | 103 | 2.78E-04 |
| cg27638597 | <i>SNTA1</i>    | -5.764 | 127 | 35  | 2.78E-04 |
| cg05146205 | <i>CUTL1</i>    | -4.913 | 49  | 113 | 2.78E-04 |
| cg17640322 | <i>CD44</i>     | -5.118 | 49  | 113 | 2.78E-04 |
| cg02856727 | <i>GH2</i>      | 0.793  | 44  | 118 | 2.78E-04 |
| cg09325101 | <i>OSTbeta</i>  | -1.130 | 78  | 84  | 2.78E-04 |
| cg01685739 | <i>SLC4A2</i>   | -4.625 | 68  | 94  | 2.78E-04 |

|            |               |        |     |     |          |
|------------|---------------|--------|-----|-----|----------|
| cg12228707 | ADM           | -5.287 | 65  | 97  | 2.79E-04 |
| cg25165880 | ACOT7         | -2.343 | 50  | 112 | 2.79E-04 |
| cg07473175 | AMIGO2        | -4.869 | 35  | 127 | 2.79E-04 |
| cg06740897 | NFE2L1        | -3.433 | 48  | 114 | 2.79E-04 |
| cg25198545 | ACTL6A        | -4.587 | 66  | 96  | 2.80E-04 |
| cg13347296 | PFDN4         | -5.043 | 82  | 80  | 2.80E-04 |
| cg02060698 | FOXO3A        | -6.217 | 57  | 105 | 2.80E-04 |
| cg00734993 | MTCH1         | -5.279 | 116 | 46  | 2.80E-04 |
| cg18678763 | RRM1          | -3.512 | 29  | 133 | 2.80E-04 |
| cg27379417 | PGBD4         | -5.226 | 84  | 78  | 2.80E-04 |
| cg15679651 | MAP4K1        | -0.686 | 77  | 85  | 2.80E-04 |
| cg11572744 | DPYSL3        | -4.690 | 63  | 99  | 2.80E-04 |
| cg11601662 | FKBP14        | -5.027 | 116 | 46  | 2.80E-04 |
| cg21038703 | ASB16         | 0.550  | 96  | 66  | 2.80E-04 |
| cg01806808 | PTK2          | -5.820 | 52  | 110 | 2.81E-04 |
| cg02961200 | DKFZp451M2119 | -4.204 | 88  | 74  | 2.81E-04 |
| cg22967016 | MICAL2        | -4.373 | 63  | 99  | 2.81E-04 |
| cg03913271 | MICAL-L1      | -3.617 | 106 | 56  | 2.81E-04 |
| cg22778947 | FSD1NL        | -2.482 | 94  | 68  | 2.81E-04 |
| cg23087130 | ABI1          | -4.830 | 52  | 110 | 2.81E-04 |
| cg05120641 | CHAC1         | -5.547 | 86  | 76  | 2.81E-04 |
| cg26222229 | PPIL1         | -4.682 | 72  | 90  | 2.81E-04 |
| cg02166313 | PAPOLA        | -4.492 | 55  | 107 | 2.81E-04 |
| cg12152256 | ZNF410        | -5.256 | 80  | 82  | 2.81E-04 |
| cg20629097 | EXO1          | -5.006 | 89  | 73  | 2.81E-04 |
| cg21458116 | GGA1          | -4.669 | 61  | 101 | 2.81E-04 |
| cg19794490 | NCOA6         | -4.421 | 100 | 62  | 2.82E-04 |
| cg08891270 | MDS032        | -5.564 | 52  | 110 | 2.82E-04 |
| cg12239750 | ALDH18A1      | -5.800 | 81  | 81  | 2.82E-04 |
| cg23602533 | TTPA          | -3.754 | 83  | 79  | 2.82E-04 |
| cg02235880 | FANCF         | -3.421 | 52  | 110 | 2.83E-04 |
| cg09685747 | PNPT1         | -4.428 | 47  | 115 | 2.83E-04 |
| cg16330965 | SNAPC5        | -0.129 | 83  | 79  | 2.83E-04 |
| cg20597908 | ARPC3         | -4.716 | 26  | 136 | 2.83E-04 |
| cg03876618 | IGFBP7        | -2.950 | 79  | 83  | 2.84E-04 |
| cg07086898 | USMG5         | -5.238 | 46  | 116 | 2.84E-04 |
| cg10805676 | MRPL28        | 2.270  | 66  | 96  | 2.84E-04 |
| cg17503456 | FOXL2         | -3.481 | 52  | 110 | 2.84E-04 |
| cg19873785 | ZNHIT1        | -4.631 | 80  | 82  | 2.84E-04 |
| cg25485913 | NTF5          | -1.546 | 110 | 52  | 2.84E-04 |
| cg05016508 | FLRT1         | 5.358  | 81  | 81  | 2.84E-04 |
| cg03332113 | RAI14         | -4.406 | 99  | 63  | 2.84E-04 |
| cg03294619 | NKX2-5        | -5.212 | 103 | 59  | 2.84E-04 |
| cg17718515 | IPO9          | -5.746 | 93  | 69  | 2.84E-04 |
| cg08250444 | EFNA1         | -5.513 | 49  | 113 | 2.85E-04 |
| cg08303146 | KCNQ1         | -5.805 | 69  | 93  | 2.85E-04 |
| cg15972617 | GM2A          | -3.123 | 49  | 113 | 2.85E-04 |
| cg18194038 | CIRBP         | -4.151 | 49  | 113 | 2.85E-04 |
| cg20904141 | MRPL45        | -5.164 | 78  | 84  | 2.85E-04 |
| cg13942909 | GOLGA2        | -4.617 | 130 | 32  | 2.85E-04 |
| cg17769238 | H19           | 0.622  | 85  | 77  | 2.85E-04 |
| cg03165700 | ATM           | -4.546 | 32  | 130 | 2.85E-04 |
| cg05916196 | IL19          | 1.982  | 92  | 70  | 2.86E-04 |
| cg10011232 | FKBP8         | -2.960 | 81  | 81  | 2.86E-04 |
| cg02810773 | ITPA          | -5.502 | 80  | 82  | 2.86E-04 |

|            |                  |        |     |     |          |
|------------|------------------|--------|-----|-----|----------|
| cg20591405 | <i>RAB6B</i>     | -5.645 | 56  | 106 | 2.86E-04 |
| cg01951308 | <i>KIF3B</i>     | -5.082 | 78  | 84  | 2.87E-04 |
| cg02735133 | <i>DCTN5</i>     | -6.348 | 86  | 76  | 2.87E-04 |
| cg23916158 | <i>MYBBP1A</i>   | -5.303 | 79  | 83  | 2.87E-04 |
| cg04060163 | <i>SEC14L1</i>   | -3.470 | 67  | 95  | 2.87E-04 |
| cg23134169 | <i>SLC35E1</i>   | -5.694 | 111 | 51  | 2.87E-04 |
| cg02420102 | <i>MGC33948</i>  | -4.798 | 63  | 99  | 2.88E-04 |
| cg17598875 | <i>C14orf133</i> | -4.584 | 55  | 107 | 2.88E-04 |
| cg06481786 | <i>RAD52B</i>    | -2.522 | 33  | 129 | 2.88E-04 |
| cg13980473 | <i>TSPYL1</i>    | -4.116 | 31  | 131 | 2.88E-04 |
| cg13260333 | <i>C6orf108</i>  | -3.618 | 55  | 107 | 2.89E-04 |
| cg15664067 | <i>RASA1</i>     | -4.256 | 113 | 49  | 2.89E-04 |
| cg11151820 | <i>CCT5</i>      | -5.283 | 146 | 16  | 2.89E-04 |
| cg19626078 | <i>KNDC1</i>     | -4.698 | 97  | 65  | 2.90E-04 |
| cg24693620 | <i>RAB5B</i>     | -5.579 | 34  | 128 | 2.90E-04 |
| cg15384392 | <i>ARHGAP1</i>   | -4.940 | 43  | 119 | 2.90E-04 |
| cg17518962 | <i>GAL3ST4</i>   | -2.325 | 81  | 81  | 2.90E-04 |
| cg18699004 | <i>FLJ22386</i>  | -5.259 | 76  | 86  | 2.90E-04 |
| cg07611177 | <i>LOC91137</i>  | -4.712 | 65  | 97  | 2.90E-04 |
| cg00630249 | <i>CYB561D1</i>  | -5.148 | 51  | 111 | 2.90E-04 |
| cg13216088 | <i>PSMD1</i>     | -4.898 | 79  | 83  | 2.90E-04 |
| cg07004820 | <i>TGFA</i>      | -4.178 | 52  | 110 | 2.90E-04 |
| cg22946876 | <i>RASSF8</i>    | -4.416 | 62  | 100 | 2.90E-04 |
| cg05411032 | <i>CLPTM1</i>    | -5.012 | 88  | 74  | 2.90E-04 |
| cg01494864 | <i>ALG3</i>      | -4.603 | 77  | 85  | 2.90E-04 |
| cg08308286 | <i>ET</i>        | -5.775 | 112 | 50  | 2.90E-04 |
| cg08708323 | <i>C16orf34</i>  | -4.331 | 89  | 73  | 2.91E-04 |
| cg17832674 | <i>CALM3</i>     | -3.798 | 113 | 49  | 2.91E-04 |
| cg24394865 | <i>MRPL11</i>    | -4.273 | 72  | 90  | 2.91E-04 |
| cg24999924 | <i>C20orf20</i>  | -4.209 | 78  | 84  | 2.91E-04 |
| cg15234096 | <i>LIX1</i>      | 1.967  | 37  | 125 | 2.91E-04 |
| cg03311036 | <i>CASP2</i>     | -4.883 | 94  | 68  | 2.91E-04 |
| cg23442323 | <i>CD109</i>     | -4.023 | 90  | 72  | 2.91E-04 |
| cg06330621 | <i>ZCCHC14</i>   | -0.369 | 100 | 62  | 2.91E-04 |
| cg12873941 | <i>MOAP1</i>     | -4.451 | 47  | 115 | 2.91E-04 |
| cg03763616 | <i>SPIB</i>      | -2.392 | 97  | 65  | 2.91E-04 |
| cg14255089 | <i>ZMYND11</i>   | -3.858 | 94  | 68  | 2.92E-04 |
| cg27161973 | <i>DDX27</i>     | -4.217 | 38  | 124 | 2.92E-04 |
| cg13135121 | <i>HSPA2</i>     | 3.481  | 26  | 136 | 2.92E-04 |
| cg07880061 | <i>PX19</i>      | -5.419 | 69  | 93  | 2.92E-04 |
| cg09461185 | <i>PTGS2</i>     | -4.814 | 77  | 85  | 2.92E-04 |
| cg23152667 | <i>TBCA</i>      | -2.843 | 71  | 91  | 2.92E-04 |
| cg26484333 | <i>TMEM34</i>    | -5.505 | 75  | 87  | 2.92E-04 |
| cg04462209 | <i>KLHL12</i>    | -6.116 | 36  | 126 | 2.92E-04 |
| cg05851163 | <i>C18orf4</i>   | -4.421 | 81  | 81  | 2.92E-04 |
| cg08801754 | <i>ZCCHC10</i>   | 1.639  | 71  | 91  | 2.92E-04 |
| cg02525396 | <i>TOMM40L</i>   | -3.320 | 119 | 43  | 2.93E-04 |
| cg15127806 | <i>MRPL42</i>    | -4.358 | 28  | 134 | 2.93E-04 |
| cg24438217 | <i>SCC-112</i>   | -1.390 | 98  | 63  | 2.93E-04 |
| cg24606773 | <i>RAB21</i>     | -5.318 | 65  | 97  | 2.93E-04 |
| cg26456957 | <i>PPP1R12C</i>  | -4.675 | 68  | 94  | 2.93E-04 |
| cg04497885 | <i>GSK3A</i>     | -5.499 | 81  | 81  | 2.93E-04 |
| cg04422896 | <i>C12orf43</i>  | -4.774 | 55  | 107 | 2.93E-04 |
| cg04305134 | <i>ANXA7</i>     | -5.845 | 102 | 60  | 2.94E-04 |
| cg23970338 | <i>TSFM</i>      | -4.498 | 87  | 75  | 2.94E-04 |

|            |                  |        |     |     |          |
|------------|------------------|--------|-----|-----|----------|
| cg13438944 | <i>MGC16028</i>  | -4.990 | 63  | 99  | 2.94E-04 |
| cg08831348 | <i>EML2</i>      | -2.314 | 106 | 56  | 2.94E-04 |
| cg10367730 | <i>PRDX3</i>     | -4.142 | 46  | 116 | 2.94E-04 |
| cg22041658 | <i>POP4</i>      | -5.095 | 52  | 110 | 2.94E-04 |
| cg01693157 | <i>TUBA1</i>     | -5.342 | 79  | 83  | 2.94E-04 |
| cg15842483 | <i>C8orf1</i>    | -3.702 | 44  | 118 | 2.94E-04 |
| cg20312475 | <i>GPRC5B</i>    | -4.986 | 136 | 26  | 2.94E-04 |
| cg17354052 | <i>UBPH</i>      | -5.181 | 36  | 126 | 2.94E-04 |
| cg24401912 | <i>STYK1</i>     | -4.314 | 86  | 76  | 2.94E-04 |
| cg09087966 | <i>CCNG2</i>     | -5.801 | 88  | 74  | 2.94E-04 |
| cg18139900 | <i>ZNF140</i>    | -4.463 | 92  | 70  | 2.94E-04 |
| cg18469326 | <i>C17orf41</i>  | -4.724 | 55  | 107 | 2.94E-04 |
| cg18294257 | <i>SEC14L3</i>   | -1.090 | 118 | 44  | 2.95E-04 |
| cg19744131 | <i>PRUNE</i>     | -5.042 | 87  | 75  | 2.95E-04 |
| cg13752949 | <i>CP110</i>     | -4.069 | 135 | 27  | 2.95E-04 |
| cg04733302 | <i>TTC18</i>     | -4.540 | 72  | 90  | 2.96E-04 |
| cg01439669 | <i>ENC1</i>      | -5.889 | 54  | 108 | 2.96E-04 |
| cg23652939 | <i>C1orf160</i>  | -5.368 | 78  | 84  | 2.96E-04 |
| cg11995732 | <i>MGC3731</i>   | -5.740 | 75  | 87  | 2.96E-04 |
| cg17470697 | <i>C10orf56</i>  | -4.623 | 91  | 71  | 2.96E-04 |
| cg24808674 | <i>RNF11</i>     | -4.249 | 46  | 116 | 2.96E-04 |
| cg25985437 | <i>FAM96A</i>    | -5.545 | 45  | 117 | 2.96E-04 |
| cg04633384 | <i>C18orf1</i>   | -4.135 | 95  | 67  | 2.96E-04 |
| cg11659747 | <i>SCARB2</i>    | -2.686 | 93  | 69  | 2.96E-04 |
| cg05751159 | <i>TSGA14</i>    | -5.717 | 89  | 73  | 2.97E-04 |
| cg24003542 | <i>MCC</i>       | -5.519 | 73  | 89  | 2.97E-04 |
| cg07159490 | <i>NXPH4</i>     | -5.080 | 97  | 65  | 2.97E-04 |
| cg24602243 | <i>TRIO</i>      | -3.708 | 90  | 72  | 2.97E-04 |
| cg12688215 | <i>KT112</i>     | -6.188 | 55  | 107 | 2.97E-04 |
| cg11973688 | <i>FPGS</i>      | -5.566 | 72  | 90  | 2.98E-04 |
| cg12977318 | <i>VPS26B</i>    | -5.659 | 73  | 89  | 2.98E-04 |
| cg21145624 | <i>MEIS3</i>     | -4.013 | 117 | 45  | 2.98E-04 |
| cg25325612 | <i>VPS35</i>     | -5.644 | 67  | 95  | 2.98E-04 |
| cg08781448 | <i>GALNS</i>     | -6.306 | 68  | 94  | 2.98E-04 |
| cg13983578 | <i>DUSP4</i>     | -5.335 | 37  | 125 | 3.00E-04 |
| cg07990489 | <i>NUP35</i>     | -5.044 | 71  | 91  | 3.00E-04 |
| cg08927489 | <i>ZNF687</i>    | -5.024 | 118 | 44  | 3.00E-04 |
| cg22782492 | <i>VHL</i>       | -4.232 | 79  | 83  | 3.00E-04 |
| cg06453691 | <i>FLJ32206</i>  | 1.522  | 121 | 41  | 3.00E-04 |
| cg12815916 | <i>PTPN18</i>    | 4.268  | 119 | 43  | 3.00E-04 |
| cg06189653 | <i>PRR7</i>      | -3.896 | 59  | 103 | 3.00E-04 |
| cg18486150 | <i>KIF17</i>     | -2.335 | 110 | 52  | 3.00E-04 |
| cg24262469 | <i>TIPARP</i>    | -1.741 | 104 | 58  | 3.00E-04 |
| cg21182454 | <i>MERTK</i>     | -5.568 | 88  | 74  | 3.00E-04 |
| cg27147306 | <i>STK3</i>      | -4.126 | 54  | 108 | 3.00E-04 |
| cg26021103 | <i>OACT5</i>     | -5.111 | 81  | 81  | 3.00E-04 |
| cg13976438 | <i>C12orf50</i>  | 2.187  | 99  | 63  | 3.00E-04 |
| cg09778734 | <i>FLJ40142</i>  | 2.880  | 39  | 123 | 3.00E-04 |
| cg05844583 | <i>SLC19A3</i>   | -5.062 | 93  | 69  | 3.01E-04 |
| cg09377899 | <i>DDX11</i>     | -5.003 | 50  | 112 | 3.01E-04 |
| cg17291001 | <i>SERPINA13</i> | 2.162  | 63  | 99  | 3.01E-04 |
| cg15585905 | <i>ANAPC1</i>    | -5.659 | 89  | 73  | 3.01E-04 |
| cg05909475 | <i>ETV3</i>      | -4.591 | 45  | 117 | 3.01E-04 |
| cg14499797 | <i>SOX4</i>      | -3.288 | 109 | 53  | 3.01E-04 |
| cg03774732 | <i>PAF1</i>      | -6.134 | 100 | 62  | 3.02E-04 |

|            |                  |        |     |     |          |
|------------|------------------|--------|-----|-----|----------|
| cg07948245 | <i>ARHGAP5</i>   | -6.026 | 103 | 59  | 3.02E-04 |
| cg21503093 | <i>EMP2</i>      | -5.081 | 46  | 116 | 3.03E-04 |
| cg12062492 | <i>DHRS4</i>     | -1.926 | 67  | 95  | 3.03E-04 |
| cg15984822 | <i>CCDC6</i>     | -2.784 | 67  | 95  | 3.03E-04 |
| cg10018778 | <i>TSPAN31</i>   | -5.318 | 94  | 68  | 3.04E-04 |
| cg17639059 | <i>NAB2</i>      | -5.656 | 61  | 101 | 3.04E-04 |
| cg11726593 | <i>IMPA1</i>     | -1.591 | 80  | 82  | 3.04E-04 |
| cg09543792 | <i>SLC16A13</i>  | -4.476 | 41  | 121 | 3.04E-04 |
| cg24580526 | <i>CDK2AP1</i>   | -4.616 | 80  | 82  | 3.04E-04 |
| cg10984852 | <i>ECHS1</i>     | -3.351 | 75  | 87  | 3.04E-04 |
| cg10234776 | <i>NRBF2</i>     | -5.100 | 81  | 81  | 3.05E-04 |
| cg00151607 | <i>GALNS</i>     | -4.981 | 80  | 82  | 3.05E-04 |
| cg22080282 | <i>ZADH2</i>     | -3.327 | 67  | 95  | 3.05E-04 |
| cg02496295 | <i>ADD1</i>      | -5.847 | 85  | 77  | 3.05E-04 |
| cg22974215 | <i>B3GAT3</i>    | -5.006 | 54  | 108 | 3.05E-04 |
| cg12809314 | <i>ZNF445</i>    | -3.783 | 105 | 57  | 3.06E-04 |
| cg00213044 | <i>KRT6C</i>     | 1.408  | 80  | 82  | 3.06E-04 |
| cg16310717 | <i>CCND2</i>     | -2.319 | 92  | 70  | 3.06E-04 |
| cg21046940 | <i>DAP</i>       | -4.862 | 40  | 122 | 3.07E-04 |
| cg14001567 | <i>TP53AP1</i>   | -3.974 | 85  | 77  | 3.07E-04 |
| cg15781316 | <i>SHFM1</i>     | -5.155 | 37  | 125 | 3.07E-04 |
| cg07550278 | <i>C10orf4</i>   | -5.338 | 97  | 65  | 3.07E-04 |
| cg07099627 | <i>LPPR2</i>     | -5.171 | 102 | 60  | 3.08E-04 |
| cg15339605 | <i>TFEC</i>      | -2.883 | 101 | 61  | 3.08E-04 |
| cg08101172 | <i>PSIP1</i>     | -2.999 | 30  | 132 | 3.08E-04 |
| cg10221501 | <i>CMTM1</i>     | 3.326  | 55  | 107 | 3.08E-04 |
| cg05266460 | <i>Rgr</i>       | 1.594  | 119 | 43  | 3.08E-04 |
| cg01350700 | <i>DCXR</i>      | -4.467 | 54  | 108 | 3.08E-04 |
| cg15880738 | <i>CD3G</i>      | 1.076  | 96  | 66  | 3.08E-04 |
| cg08418747 | <i>PMS2L5</i>    | -5.834 | 63  | 99  | 3.08E-04 |
| cg05257479 | <i>WARS2</i>     | -5.433 | 52  | 110 | 3.09E-04 |
| cg10563284 | <i>PAK6</i>      | -4.741 | 99  | 63  | 3.10E-04 |
| cg19252175 | <i>FLJ20035</i>  | -4.026 | 35  | 127 | 3.10E-04 |
| cg27563210 | <i>USP49</i>     | -4.605 | 46  | 116 | 3.10E-04 |
| cg14171478 | <i>C14orf118</i> | -4.283 | 40  | 122 | 3.10E-04 |
| cg23679141 | <i>ANP32C</i>    | -1.945 | 67  | 95  | 3.10E-04 |
| cg24922992 | <i>SLC22A7</i>   | -0.133 | 58  | 104 | 3.10E-04 |
| cg04558861 | <i>F25965</i>    | -5.433 | 92  | 70  | 3.11E-04 |
| cg25530169 | <i>SPIN</i>      | -5.006 | 107 | 55  | 3.11E-04 |
| cg11451801 | <i>PSMB10</i>    | -5.663 | 60  | 102 | 3.11E-04 |
| cg22499964 | <i>EGLN2</i>     | -4.816 | 85  | 77  | 3.11E-04 |
| cg27476329 | <i>GOLGA2L1</i>  | 1.798  | 80  | 82  | 3.11E-04 |
| cg11961618 | <i>PHLDA2</i>    | -4.067 | 45  | 117 | 3.12E-04 |
| cg01909833 | <i>BRD2</i>      | -4.754 | 91  | 71  | 3.12E-04 |
| cg12243255 | <i>AXUD1</i>     | -6.113 | 102 | 60  | 3.12E-04 |
| cg21574752 | <i>COPG2</i>     | -4.381 | 76  | 86  | 3.12E-04 |
| cg23512958 | <i>IL7</i>       | -5.023 | 40  | 122 | 3.12E-04 |
| cg00009407 | <i>TTC8</i>      | -5.703 | 41  | 121 | 3.12E-04 |
| cg07534467 | <i>ZNF16</i>     | -4.371 | 85  | 77  | 3.12E-04 |
| cg11649825 | <i>C20orf4</i>   | -4.094 | 46  | 116 | 3.13E-04 |
| cg16175725 | <i>TCF1</i>      | 3.141  | 82  | 80  | 3.13E-04 |
| cg07063745 | <i>LANCL1</i>    | -4.236 | 63  | 99  | 3.13E-04 |
| cg10266068 | <i>PGPEP1</i>    | -3.016 | 108 | 54  | 3.13E-04 |
| cg15563993 | <i>WDR61</i>     | -5.303 | 96  | 66  | 3.13E-04 |
| cg24481633 | <i>DOCK4</i>     | -5.945 | 48  | 114 | 3.14E-04 |

|            |                   |        |     |     |          |
|------------|-------------------|--------|-----|-----|----------|
| cg08283293 | <i>RNF44</i>      | -5.088 | 50  | 112 | 3.14E-04 |
| cg13255190 | <i>GALNT8</i>     | 0.671  | 75  | 87  | 3.14E-04 |
| cg16299341 | <i>OSBPL9</i>     | -4.669 | 118 | 44  | 3.14E-04 |
| cg03129910 | <i>SRP72</i>      | -4.739 | 105 | 57  | 3.15E-04 |
| cg10064162 | <i>LAMB1</i>      | -2.194 | 83  | 79  | 3.15E-04 |
| cg12962021 | <i>LIN9</i>       | -3.580 | 92  | 70  | 3.15E-04 |
| cg02460349 | <i>RRBP1</i>      | -5.564 | 76  | 86  | 3.15E-04 |
| cg10477754 | <i>PPRC1</i>      | -3.655 | 40  | 122 | 3.15E-04 |
| cg08554114 | <i>ERO1L</i>      | 1.462  | 105 | 57  | 3.15E-04 |
| cg15299463 | <i>TEAD2</i>      | -4.915 | 68  | 94  | 3.15E-04 |
| cg26783856 | <i>LRRC8D</i>     | -3.052 | 50  | 112 | 3.15E-04 |
| cg05932936 | <i>SERINC3</i>    | -4.172 | 139 | 23  | 3.16E-04 |
| cg01036779 | <i>SH2D3A</i>     | -1.485 | 42  | 120 | 3.16E-04 |
| cg15611923 | <i>RBM8A</i>      | -4.448 | 108 | 54  | 3.16E-04 |
| cg15942562 | <i>CDCA3</i>      | 2.888  | 72  | 90  | 3.16E-04 |
| cg02760007 | <i>SRF</i>        | -3.822 | 70  | 92  | 3.16E-04 |
| cg09013626 | <i>RYBP</i>       | -4.007 | 94  | 68  | 3.17E-04 |
| cg13882267 | <i>ITGA9</i>      | -5.302 | 52  | 110 | 3.17E-04 |
| cg07223164 | <i>DC2</i>        | -3.798 | 70  | 92  | 3.17E-04 |
| cg20180148 | <i>DNM1L</i>      | -5.337 | 72  | 90  | 3.17E-04 |
| cg22982528 | <i>BRWD1</i>      | -5.608 | 56  | 106 | 3.17E-04 |
| cg11378840 | <i>HHEX</i>       | -5.573 | 93  | 69  | 3.18E-04 |
| cg18676237 | <i>SERPINB9</i>   | -4.954 | 53  | 109 | 3.18E-04 |
| cg16054422 | <i>SART3</i>      | -4.870 | 84  | 78  | 3.18E-04 |
| cg23989635 | <i>CDH1</i>       | -3.211 | 112 | 50  | 3.19E-04 |
| cg08955609 | <i>APOE</i>       | -4.236 | 108 | 54  | 3.19E-04 |
| cg07271268 | <i>JARID1A</i>    | -5.656 | 53  | 109 | 3.19E-04 |
| cg13310628 | <i>SOLH</i>       | -5.831 | 75  | 87  | 3.19E-04 |
| cg20970875 | <i>ANKRD47</i>    | -5.081 | 67  | 95  | 3.19E-04 |
| cg12315302 | <i>HIST1H4D</i>   | -4.240 | 98  | 64  | 3.19E-04 |
| cg27068170 | <i>HSD17B12</i>   | -5.170 | 92  | 70  | 3.19E-04 |
| cg24936630 | <i>DDX10</i>      | -4.510 | 83  | 79  | 3.20E-04 |
| cg08704509 | <i>GRAMD3</i>     | -4.677 | 99  | 63  | 3.20E-04 |
| cg13823136 | <i>ST6GALNAC5</i> | -5.119 | 54  | 108 | 3.22E-04 |
| cg18379495 | <i>ZNF703</i>     | -3.281 | 74  | 88  | 3.22E-04 |
| cg09410845 | <i>BMPR2</i>      | -4.302 | 115 | 47  | 3.22E-04 |
| cg10274908 | <i>RASA4</i>      | -5.201 | 87  | 75  | 3.22E-04 |
| cg20615951 | <i>C1orf71</i>    | -6.438 | 90  | 72  | 3.22E-04 |
| cg22223602 | <i>CBL</i>        | -4.816 | 55  | 107 | 3.22E-04 |
| cg07118638 | <i>THEX1</i>      | -4.684 | 122 | 40  | 3.22E-04 |
| cg22140675 | <i>G6PC3</i>      | -3.369 | 52  | 110 | 3.23E-04 |
| cg14149007 | <i>PRKD2</i>      | -4.669 | 43  | 119 | 3.23E-04 |
| cg15819853 | <i>MFHAS1</i>     | -4.380 | 50  | 112 | 3.23E-04 |
| cg04230869 | <i>RRM2B</i>      | -4.462 | 57  | 105 | 3.23E-04 |
| cg06973760 | <i>NFATC1</i>     | -4.385 | 64  | 98  | 3.23E-04 |
| cg12238343 | <i>RLN3R1</i>     | -4.347 | 82  | 80  | 3.23E-04 |
| cg25300941 | <i>VPS4A</i>      | -4.715 | 81  | 81  | 3.24E-04 |
| cg22189725 | <i>ADC</i>        | -4.121 | 106 | 56  | 3.24E-04 |
| cg09197965 | <i>TUBA1</i>      | -5.094 | 65  | 97  | 3.24E-04 |
| cg04183933 | <i>HSPE1</i>      | -5.173 | 82  | 80  | 3.24E-04 |
| cg12259256 | <i>TMEM101</i>    | -4.530 | 111 | 51  | 3.24E-04 |
| cg17747332 | <i>SMARCA4</i>    | -4.580 | 122 | 40  | 3.24E-04 |
| cg00185839 | <i>LRDD</i>       | -4.534 | 82  | 80  | 3.25E-04 |
| cg05872485 | <i>PTGES3</i>     | -4.781 | 89  | 73  | 3.25E-04 |
| cg27431396 | <i>C20orf144</i>  | 3.707  | 73  | 89  | 3.25E-04 |

|            |                 |        |     |     |          |
|------------|-----------------|--------|-----|-----|----------|
| cg20536369 | <i>TIMM13</i>   | -4.565 | 55  | 107 | 3.26E-04 |
| cg26233529 | <i>WDR32</i>    | -5.708 | 102 | 60  | 3.26E-04 |
| cg01808090 | <i>NUBP1</i>    | -4.878 | 71  | 91  | 3.26E-04 |
| cg07590705 | <i>CHCHD3</i>   | -4.876 | 40  | 122 | 3.26E-04 |
| cg20051033 | <i>CPNE9</i>    | -2.512 | 63  | 99  | 3.26E-04 |
| cg14529146 | <i>SC65</i>     | -4.215 | 85  | 77  | 3.26E-04 |
| cg07263984 | <i>AP3S1</i>    | -5.575 | 37  | 125 | 3.27E-04 |
| cg03876622 | <i>CSDA</i>     | -2.436 | 76  | 86  | 3.27E-04 |
| cg10164137 | <i>DVL1</i>     | -4.507 | 102 | 60  | 3.27E-04 |
| cg17084361 | <i>CDS1</i>     | -4.379 | 77  | 85  | 3.27E-04 |
| cg14501253 | <i>FLJ36980</i> | -4.133 | 98  | 64  | 3.27E-04 |
| cg02943497 | <i>PARP4</i>    | -3.461 | 92  | 70  | 3.28E-04 |
| cg10248733 | <i>CALR3</i>    | -3.891 | 48  | 114 | 3.28E-04 |
| cg21955402 | <i>SMCR7</i>    | -4.468 | 109 | 53  | 3.28E-04 |
| cg26218269 | <i>MAB21L2</i>  | 0.810  | 89  | 73  | 3.28E-04 |
| cg07965714 | <i>XPA</i>      | -5.177 | 76  | 86  | 3.28E-04 |
| cg04051458 | <i>THBS1</i>    | -4.644 | 50  | 112 | 3.28E-04 |
| cg25876934 | <i>WEE1</i>     | -4.045 | 74  | 88  | 3.29E-04 |
| cg13917504 | <i>MEST</i>     | 0.808  | 95  | 67  | 3.29E-04 |
| cg11102794 | <i>LMO1</i>     | -3.379 | 57  | 105 | 3.29E-04 |
| cg20644453 | <i>C21orf59</i> | -5.442 | 119 | 43  | 3.29E-04 |
| cg25951582 | <i>DTWD1</i>    | -4.489 | 26  | 136 | 3.30E-04 |
| cg03479797 | <i>CREBL1</i>   | -4.355 | 49  | 113 | 3.30E-04 |
| cg03970351 | <i>TERF2</i>    | -6.023 | 59  | 103 | 3.30E-04 |
| cg10426652 | <i>WDR75</i>    | -4.800 | 103 | 59  | 3.30E-04 |
| cg12377712 | <i>ATP6V1G1</i> | -5.343 | 80  | 82  | 3.30E-04 |
| cg07897837 | <i>C1orf131</i> | -5.836 | 44  | 118 | 3.31E-04 |
| cg02372712 | <i>ZNF467</i>   | -2.092 | 69  | 93  | 3.31E-04 |
| cg00515905 | <i>EPS8L3</i>   | 3.198  | 91  | 71  | 3.31E-04 |
| cg25277950 | <i>EML2</i>     | -3.246 | 65  | 97  | 3.31E-04 |
| cg02995130 | <i>RSN</i>      | -5.514 | 68  | 94  | 3.31E-04 |
| cg21652958 | <i>THBS2</i>    | -3.910 | 113 | 49  | 3.31E-04 |
| cg23751922 | <i>CREG1</i>    | -3.827 | 43  | 119 | 3.32E-04 |
| cg09164559 | <i>KIAA1279</i> | -3.264 | 43  | 119 | 3.32E-04 |
| cg15414833 | <i>RPIB9</i>    | -5.068 | 65  | 97  | 3.32E-04 |
| cg16013246 | <i>RCC1</i>     | -5.199 | 71  | 91  | 3.32E-04 |
| cg00495491 | <i>ITPR2</i>    | 1.367  | 103 | 59  | 3.32E-04 |
| cg04762346 | <i>EDG5</i>     | -5.237 | 110 | 52  | 3.32E-04 |
| cg24453353 | <i>HIST1H4C</i> | -5.214 | 80  | 82  | 3.32E-04 |
| cg05368341 | <i>SYT6</i>     | -4.476 | 84  | 78  | 3.33E-04 |
| cg13573276 | <i>RDHE2</i>    | -3.176 | 67  | 95  | 3.33E-04 |
| cg16478145 | <i>TFPI</i>     | 0.551  | 41  | 121 | 3.33E-04 |
| cg21896452 | <i>TPRKB</i>    | -5.166 | 74  | 88  | 3.33E-04 |
| cg14455307 | <i>BCL2</i>     | -5.622 | 74  | 88  | 3.33E-04 |
| cg26798624 | <i>ATAD3B</i>   | -5.522 | 47  | 115 | 3.33E-04 |
| cg15264808 | <i>C16orf61</i> | -4.427 | 42  | 120 | 3.34E-04 |
| cg16688376 | <i>AKAP9</i>    | -4.151 | 42  | 120 | 3.34E-04 |
| cg27015174 | <i>LCMT2</i>    | -5.510 | 69  | 93  | 3.34E-04 |
| cg24516061 | <i>RGS19</i>    | -5.412 | 60  | 102 | 3.35E-04 |
| cg21849289 | <i>C1orf123</i> | -5.486 | 33  | 129 | 3.35E-04 |
| cg24995798 | <i>C10orf63</i> | -3.962 | 46  | 116 | 3.35E-04 |
| cg20857455 | <i>CPNE8</i>    | -3.906 | 63  | 99  | 3.35E-04 |
| cg03091512 | <i>RHBDD1</i>   | -5.070 | 94  | 68  | 3.36E-04 |
| cg03473294 | <i>TASP1</i>    | -4.780 | 41  | 121 | 3.36E-04 |
| cg09222791 | <i>FLJ35894</i> | 5.197  | 108 | 54  | 3.36E-04 |

|            |                  |        |     |     |          |
|------------|------------------|--------|-----|-----|----------|
| cg12034229 | <i>HUS1</i>      | -5.727 | 38  | 124 | 3.36E-04 |
| cg08613513 | <i>ORC1L</i>     | -5.238 | 77  | 85  | 3.36E-04 |
| cg08292112 | <i>HIP2</i>      | -5.124 | 56  | 106 | 3.36E-04 |
| cg00929606 | <i>ZNF3</i>      | -1.505 | 113 | 49  | 3.36E-04 |
| cg04961553 | <i>OCIAD2</i>    | -5.180 | 67  | 95  | 3.37E-04 |
| cg09008187 | <i>SLC25A35</i>  | -5.715 | 67  | 95  | 3.37E-04 |
| cg09531892 | <i>LRP12</i>     | -3.125 | 60  | 102 | 3.37E-04 |
| cg12558519 | <i>KLHL26</i>    | -4.045 | 102 | 60  | 3.37E-04 |
| cg21465754 | <i>RAD51</i>     | -5.743 | 71  | 91  | 3.37E-04 |
| cg19318326 | <i>KIAA1919</i>  | -5.480 | 63  | 99  | 3.37E-04 |
| cg15990015 | <i>DMAP1</i>     | -4.050 | 39  | 123 | 3.38E-04 |
| cg09958090 | <i>KLHL22</i>    | -5.151 | 123 | 39  | 3.38E-04 |
| cg26301689 | <i>PAQR9</i>     | 5.268  | 91  | 71  | 3.39E-04 |
| cg12425673 | <i>WNK1</i>      | -4.916 | 92  | 70  | 3.39E-04 |
| cg22956254 | <i>GDF3</i>      | -1.769 | 33  | 127 | 3.39E-04 |
| cg07664027 | <i>RPL13A</i>    | 2.519  | 39  | 123 | 3.39E-04 |
| cg06459066 | <i>MTHFD1</i>    | -4.532 | 64  | 98  | 3.39E-04 |
| cg15125424 | <i>SOCS2</i>     | -3.877 | 120 | 42  | 3.40E-04 |
| cg03764506 | <i>ESRRA</i>     | -4.951 | 52  | 110 | 3.40E-04 |
| cg07817783 | <i>DAP</i>       | -5.629 | 47  | 115 | 3.40E-04 |
| cg23196133 | <i>POLR2A</i>    | -5.469 | 50  | 112 | 3.40E-04 |
| cg12446644 | <i>LASP1</i>     | -4.203 | 53  | 109 | 3.41E-04 |
| cg24937126 | <i>LAMB1</i>     | -5.139 | 96  | 66  | 3.41E-04 |
| cg26591879 | <i>ATF6</i>      | -3.454 | 72  | 89  | 3.41E-04 |
| cg15238200 | <i>TRIM65</i>    | 0.962  | 83  | 79  | 3.41E-04 |
| cg19832597 | <i>GARS</i>      | -5.647 | 62  | 100 | 3.41E-04 |
| cg08056903 | <i>GPHN</i>      | -4.216 | 72  | 90  | 3.42E-04 |
| cg00465846 | <i>RNF139</i>    | -5.496 | 31  | 131 | 3.42E-04 |
| cg03029145 | <i>SMAD2</i>     | -4.772 | 99  | 63  | 3.43E-04 |
| cg07027685 | <i>IARS</i>      | -4.080 | 67  | 95  | 3.43E-04 |
| cg00261781 | <i>MATN3</i>     | -5.242 | 84  | 78  | 3.43E-04 |
| cg07903860 | <i>DCLRE1C</i>   | -4.128 | 51  | 111 | 3.43E-04 |
| cg12086773 | <i>C2orf25</i>   | -5.111 | 43  | 119 | 3.43E-04 |
| cg02718531 | <i>LOC114984</i> | -4.697 | 95  | 67  | 3.43E-04 |
| cg24242519 | <i>FAM49A</i>    | -3.259 | 62  | 100 | 3.43E-04 |
| cg17415555 | <i>TMTC2</i>     | -5.460 | 48  | 114 | 3.44E-04 |
| cg06710522 | <i>MRPL10</i>    | -5.555 | 73  | 89  | 3.44E-04 |
| cg01731685 | <i>IL17R</i>     | -4.457 | 86  | 76  | 3.44E-04 |
| cg03072378 | <i>DLX4</i>      | -4.065 | 76  | 86  | 3.44E-04 |
| cg17938146 | <i>ITGA10</i>    | 3.383  | 55  | 107 | 3.44E-04 |
| cg14482322 | <i>TARSL2</i>    | -4.546 | 104 | 58  | 3.44E-04 |
| cg02426410 | <i>AASDH</i>     | -5.320 | 37  | 125 | 3.44E-04 |
| cg21043754 | <i>DDB1</i>      | -6.322 | 99  | 63  | 3.45E-04 |
| cg26542888 | <i>RNF2</i>      | -5.026 | 108 | 54  | 3.45E-04 |
| cg05382565 | <i>TIGD6</i>     | -5.075 | 48  | 114 | 3.46E-04 |
| cg16958189 | <i>BTBD1</i>     | -4.103 | 68  | 94  | 3.46E-04 |
| cg17183991 | <i>HS6ST3</i>    | -4.094 | 67  | 95  | 3.46E-04 |
| cg18932540 | <i>STAG1</i>     | -5.652 | 52  | 110 | 3.46E-04 |
| cg27610561 | <i>SLC2A10</i>   | 2.128  | 110 | 52  | 3.47E-04 |
| cg11821536 | <i>TTC8</i>      | -6.014 | 51  | 111 | 3.47E-04 |
| cg10891025 | <i>EIF3S1</i>    | -4.901 | 88  | 74  | 3.47E-04 |
| cg21712678 | <i>ZC3H7B</i>    | -5.136 | 83  | 79  | 3.49E-04 |
| cg05217755 | <i>ERF</i>       | -5.653 | 85  | 77  | 3.49E-04 |
| cg23036555 | <i>PGD</i>       | -5.672 | 34  | 128 | 3.49E-04 |
| cg26752657 | <i>C1orf171</i>  | -4.695 | 48  | 114 | 3.49E-04 |

|            |           |        |     |     |          |
|------------|-----------|--------|-----|-----|----------|
| cg17044611 | ASAH1     | -5.058 | 31  | 131 | 3.49E-04 |
| cg23591853 | IFT172    | -2.007 | 100 | 62  | 3.49E-04 |
| cg24022829 | EIF2AK2   | -6.109 | 68  | 94  | 3.49E-04 |
| cg04313552 | KIAA2013  | -2.796 | 110 | 52  | 3.49E-04 |
| cg09750385 | GUCY1A3   | -4.449 | 38  | 124 | 3.49E-04 |
| cg15563057 | PURA      | -4.682 | 72  | 90  | 3.49E-04 |
| cg12748926 | FLJ36888  | -5.238 | 81  | 81  | 3.50E-04 |
| cg04979933 | INSL5     | 1.750  | 131 | 31  | 3.50E-04 |
| cg09382850 | SYPL1     | -4.009 | 104 | 58  | 3.50E-04 |
| cg21636748 | PLEKHA8   | -4.416 | 57  | 105 | 3.50E-04 |
| cg10784067 | ERCC4     | -4.818 | 67  | 95  | 3.51E-04 |
| cg15820809 | BIK       | -4.382 | 127 | 35  | 3.51E-04 |
| cg12620111 | ZNF70     | -4.543 | 84  | 78  | 3.51E-04 |
| cg12676081 | RIOK2     | -4.195 | 129 | 33  | 3.51E-04 |
| cg11166252 | AHR       | -6.309 | 88  | 74  | 3.51E-04 |
| cg21306212 | C13orf10  | -3.778 | 85  | 77  | 3.51E-04 |
| cg21840599 | PAK2      | -4.428 | 40  | 122 | 3.51E-04 |
| cg20162146 | MCM5      | 2.111  | 115 | 47  | 3.51E-04 |
| cg25461905 | C1orf49   | 3.816  | 87  | 75  | 3.52E-04 |
| cg08011170 | ELAC2     | -5.321 | 85  | 77  | 3.52E-04 |
| cg14800883 | ARPC4     | -2.787 | 35  | 126 | 3.52E-04 |
| cg19346899 | MGC24665  | -4.979 | 69  | 93  | 3.52E-04 |
| cg02441831 | SYVN1     | -4.824 | 79  | 83  | 3.52E-04 |
| cg26677874 | LRRC28    | -5.427 | 61  | 101 | 3.52E-04 |
| cg27061947 | COL4A3BP  | -5.449 | 41  | 121 | 3.52E-04 |
| cg04581377 | SLC35F2   | -4.734 | 83  | 79  | 3.52E-04 |
| cg23533073 | CHES1     | -5.131 | 106 | 56  | 3.52E-04 |
| cg15679098 | RAPSN     | 2.827  | 20  | 142 | 3.52E-04 |
| cg05477024 | KIAA1804  | -3.124 | 88  | 74  | 3.53E-04 |
| cg17767659 | BYSL      | -4.582 | 81  | 81  | 3.53E-04 |
| cg19462352 | PROCA1    | -4.970 | 47  | 115 | 3.53E-04 |
| cg24482234 | LASS1     | -3.791 | 73  | 89  | 3.53E-04 |
| cg18383160 | C14orf24  | -4.805 | 54  | 108 | 3.53E-04 |
| cg08567916 | SPRYD3    | -5.326 | 37  | 125 | 3.54E-04 |
| cg22108175 | LPL       | -2.627 | 39  | 123 | 3.54E-04 |
| cg27557796 | LY6G6C    | 1.654  | 69  | 93  | 3.54E-04 |
| cg22654935 | LOC126248 | 1.664  | 70  | 92  | 3.54E-04 |
| cg20449833 | RHOQ      | -5.421 | 114 | 48  | 3.55E-04 |
| cg07084709 | Gcom1     | 3.545  | 55  | 107 | 3.55E-04 |
| cg09722555 | CCL27     | 2.764  | 67  | 95  | 3.56E-04 |
| cg10525488 | FLJ39370  | -2.008 | 96  | 66  | 3.56E-04 |
| cg15842884 | KIAA1434  | -5.178 | 52  | 110 | 3.56E-04 |
| cg23264519 | TMPO      | -4.372 | 48  | 114 | 3.56E-04 |
| cg25892041 | UGT8      | 2.367  | 130 | 32  | 3.56E-04 |
| cg14467840 | S100A1    | 2.954  | 97  | 65  | 3.56E-04 |
| cg23335946 | C1orf26   | -4.837 | 87  | 75  | 3.57E-04 |
| cg18116253 | UBE2N     | -4.443 | 95  | 67  | 3.57E-04 |
| cg00635481 | ZNF76     | -5.946 | 60  | 102 | 3.58E-04 |
| cg03373080 | C10orf42  | -4.619 | 96  | 66  | 3.58E-04 |
| cg10663017 | DUSP23    | -3.913 | 41  | 121 | 3.58E-04 |
| cg19864851 | SEC24C    | -4.554 | 124 | 38  | 3.58E-04 |
| cg22762180 | PERP      | -4.318 | 66  | 96  | 3.58E-04 |
| cg02502132 | LRP8      | -5.658 | 70  | 92  | 3.58E-04 |
| cg25854162 | IGFBP2    | -2.670 | 56  | 106 | 3.58E-04 |
| cg17346115 | POLA2     | -5.789 | 54  | 108 | 3.59E-04 |

|            |                  |        |     |     |          |
|------------|------------------|--------|-----|-----|----------|
| cg16413777 | <i>RSAD1</i>     | -4.284 | 61  | 101 | 3.59E-04 |
| cg09529667 | <i>SSBP4</i>     | -4.651 | 79  | 83  | 3.59E-04 |
| cg13613748 | <i>VPS4B</i>     | -3.846 | 63  | 99  | 3.59E-04 |
| cg05242945 | <i>RPSA</i>      | -4.902 | 88  | 74  | 3.59E-04 |
| cg18504358 | <i>LRP10</i>     | -4.560 | 85  | 77  | 3.60E-04 |
| cg19216839 | <i>FANCA</i>     | -5.428 | 68  | 94  | 3.60E-04 |
| cg20166783 | <i>RFC1</i>      | -5.861 | 67  | 95  | 3.60E-04 |
| cg20716945 | <i>USP38</i>     | -6.070 | 62  | 100 | 3.60E-04 |
| cg24504986 | <i>ZNF346</i>    | -5.107 | 98  | 64  | 3.60E-04 |
| cg20695562 | <i>USP33</i>     | -4.338 | 80  | 82  | 3.60E-04 |
| cg19185384 | <i>TPT1</i>      | -5.887 | 47  | 115 | 3.60E-04 |
| cg15120925 | <i>RASAL1</i>    | -2.940 | 70  | 92  | 3.61E-04 |
| cg18333824 | <i>SF3A3</i>     | -4.882 | 59  | 103 | 3.61E-04 |
| cg24826645 | <i>LAMP1</i>     | -2.963 | 112 | 50  | 3.61E-04 |
| cg15661409 | <i>C14orf105</i> | 1.309  | 115 | 47  | 3.61E-04 |
| cg17677842 | <i>PRDM4</i>     | -6.136 | 124 | 38  | 3.61E-04 |
| cg24448259 | <i>CPVL</i>      | -4.377 | 55  | 107 | 3.61E-04 |
| cg03872267 | <i>MRPL46</i>    | -5.184 | 48  | 114 | 3.61E-04 |
| cg21024145 | <i>RPS15A</i>    | -5.470 | 59  | 103 | 3.61E-04 |
| cg22799917 | <i>YWHAB</i>     | -4.866 | 51  | 111 | 3.61E-04 |
| cg09926889 | <i>RNF34</i>     | -5.299 | 83  | 79  | 3.61E-04 |
| cg04185037 | <i>VIL2</i>      | -4.770 | 61  | 101 | 3.61E-04 |
| cg11225410 | <i>SOCS2</i>     | -5.238 | 78  | 84  | 3.62E-04 |
| cg04845144 | <i>RTN2</i>      | -5.114 | 94  | 68  | 3.62E-04 |
| cg09618682 | <i>SEC22L2</i>   | -4.412 | 39  | 123 | 3.62E-04 |
| cg19096034 | <i>LRPAP1</i>    | -4.244 | 78  | 84  | 3.62E-04 |
| cg02823866 | <i>CD274</i>     | -4.707 | 35  | 127 | 3.62E-04 |
| cg08428707 | <i>CHMP4B</i>    | -4.832 | 50  | 112 | 3.62E-04 |
| cg24382521 | <i>C7</i>        | 1.399  | 115 | 46  | 3.62E-04 |
| cg07453748 | <i>MGMT</i>      | 2.606  | 118 | 44  | 3.62E-04 |
| cg21577049 | <i>WDR69</i>     | -4.510 | 59  | 103 | 3.62E-04 |
| cg00014085 | <i>RetSat</i>    | -5.290 | 57  | 105 | 3.63E-04 |
| cg24358465 | <i>HIST1H2AG</i> | -5.374 | 106 | 56  | 3.63E-04 |
| cg04137116 | <i>CRI2</i>      | -4.922 | 62  | 100 | 3.64E-04 |
| cg25167838 | <i>SHH</i>       | -5.997 | 100 | 62  | 3.64E-04 |
| cg26095194 | <i>DUSP1</i>     | -5.099 | 77  | 85  | 3.64E-04 |
| cg01231779 | <i>NID2</i>      | -4.315 | 116 | 46  | 3.64E-04 |
| cg17283268 | <i>POLRMT</i>    | -4.943 | 66  | 96  | 3.65E-04 |
| cg20091107 | <i>ARL6IP2</i>   | -6.214 | 64  | 98  | 3.65E-04 |
| cg18414741 | <i>ZNF77</i>     | -6.126 | 67  | 95  | 3.65E-04 |
| cg21371335 | <i>DNAJC7</i>    | -4.155 | 113 | 49  | 3.66E-04 |
| cg19595170 | <i>SRF</i>       | -4.156 | 56  | 106 | 3.66E-04 |
| cg01902747 | <i>CCDC7</i>     | -4.024 | 108 | 54  | 3.67E-04 |
| cg04237663 | <i>KCNV1</i>     | -4.081 | 90  | 72  | 3.67E-04 |
| cg09476523 | <i>RHOBTB2</i>   | -5.470 | 54  | 108 | 3.67E-04 |
| cg10586599 | <i>ORC1L</i>     | -4.285 | 90  | 72  | 3.67E-04 |
| cg21137706 | <i>TMEM5</i>     | -4.640 | 48  | 114 | 3.67E-04 |
| cg23002907 | <i>RBMS2</i>     | -3.692 | 98  | 64  | 3.67E-04 |
| cg09961373 | <i>WIPI2</i>     | -5.120 | 62  | 100 | 3.67E-04 |
| cg00513467 | <i>KLHL9</i>     | -4.621 | 73  | 89  | 3.68E-04 |
| cg10087399 | <i>SORT1</i>     | -3.800 | 61  | 101 | 3.68E-04 |
| cg27076812 | <i>TM7SF3</i>    | -4.220 | 29  | 133 | 3.68E-04 |
| cg00405070 | <i>C12orf8</i>   | -4.801 | 49  | 113 | 3.68E-04 |
| cg24341220 | <i>RetSat</i>    | -5.064 | 84  | 78  | 3.68E-04 |
| cg03367667 | <i>STOML2</i>    | -5.623 | 40  | 122 | 3.68E-04 |

|            |            |        |     |     |          |
|------------|------------|--------|-----|-----|----------|
| cg08660285 | WDR78      | -2.869 | 65  | 97  | 3.69E-04 |
| cg06887663 | SNAPC1     | -4.393 | 91  | 71  | 3.69E-04 |
| cg02579133 | KRTAP10-8  | 2.354  | 20  | 142 | 3.69E-04 |
| cg04416752 | ST6GALNAC4 | -4.831 | 90  | 72  | 3.69E-04 |
| cg01941619 | MEP1B      | 0.978  | 75  | 87  | 3.69E-04 |
| cg05325699 | HAP1       | -4.153 | 88  | 74  | 3.69E-04 |
| cg16802646 | WWC1       | -4.510 | 45  | 117 | 3.69E-04 |
| cg22968727 | RPL11      | -4.199 | 98  | 64  | 3.69E-04 |
| cg08631437 |            | -1.779 | 57  | 105 | 3.71E-04 |
| cg03334529 | ZNF663     | -3.190 | 75  | 87  | 3.71E-04 |
| cg13854874 | CHAF1B     | -2.913 | 66  | 96  | 3.71E-04 |
| cg23411876 | NDUFB2     | -4.836 | 47  | 115 | 3.71E-04 |
| cg27321538 | DNPEP      | -4.870 | 42  | 120 | 3.72E-04 |
| cg00396163 | FLJ37357   | -4.950 | 97  | 65  | 3.72E-04 |
| cg04697119 | IGSF8      | -4.056 | 107 | 55  | 3.72E-04 |
| cg08831701 | HELZ       | -4.582 | 84  | 78  | 3.72E-04 |
| cg09299307 | CCNH       | -4.360 | 66  | 96  | 3.72E-04 |
| cg22936016 | FSIP1      | -4.036 | 99  | 63  | 3.72E-04 |
| cg26649834 | C1orf109   | -5.707 | 76  | 86  | 3.73E-04 |
| cg03380773 | FLJ25169   | -5.203 | 90  | 72  | 3.73E-04 |
| cg25336579 | PSAT1      | -6.200 | 72  | 90  | 3.73E-04 |
| cg05494069 | PRKAA2     | -3.952 | 96  | 66  | 3.73E-04 |
| cg04413148 | CTRL       | 2.579  | 132 | 30  | 3.73E-04 |
| cg13467814 | C2orf30    | -4.607 | 70  | 92  | 3.73E-04 |
| cg14332079 | CDCA2      | -5.743 | 78  | 84  | 3.73E-04 |
| cg01057962 | BCL6       | -4.781 | 58  | 104 | 3.73E-04 |
| cg12791465 | HHLA1      | 1.105  | 101 | 61  | 3.74E-04 |
| cg21241823 | PRDM15     | -1.235 | 109 | 53  | 3.74E-04 |
| cg22736107 | PSMB4      | -5.228 | 95  | 67  | 3.74E-04 |
| cg01625242 | GRP        | -1.330 | 98  | 64  | 3.74E-04 |
| cg07200897 | HSPBAP1    | -4.831 | 92  | 70  | 3.75E-04 |
| cg07770222 | C8orf31    | -0.395 | 77  | 85  | 3.75E-04 |
| cg08172935 | AMZ2       | -5.236 | 77  | 85  | 3.75E-04 |
| cg05073845 | FOXO1A     | -6.081 | 88  | 74  | 3.75E-04 |
| cg06886022 | C9orf75    | -4.094 | 88  | 74  | 3.75E-04 |
| cg01154775 | MGC29898   | -5.087 | 126 | 36  | 3.75E-04 |
| cg25344672 | FLJ46082   | 0.521  | 97  | 65  | 3.75E-04 |
| cg03109047 | GRIN1      | -3.922 | 52  | 110 | 3.75E-04 |
| cg07857181 | POLH       | -4.572 | 55  | 107 | 3.76E-04 |
| cg07139440 | MLLT11     | -3.874 | 94  | 68  | 3.77E-04 |
| cg27554769 | KLHL12     | -4.690 | 63  | 99  | 3.77E-04 |
| cg13916931 | POLD2      | -4.288 | 55  | 107 | 3.77E-04 |
| cg01429996 | NANS       | -3.942 | 80  | 82  | 3.77E-04 |
| cg06138027 | HNRPK      | -4.808 | 104 | 58  | 3.77E-04 |
| cg14958889 | GPR153     | -4.811 | 86  | 76  | 3.77E-04 |
| cg17578903 | EHD1       | -5.628 | 78  | 84  | 3.77E-04 |
| cg19166347 | SFRP4      | -3.778 | 95  | 67  | 3.78E-04 |
| cg01251255 | NSUN5      | -5.705 | 84  | 78  | 3.78E-04 |
| cg10361696 | FAM109A    | -3.519 | 74  | 88  | 3.78E-04 |
| cg10376763 | TNP1       | 3.026  | 107 | 55  | 3.79E-04 |
| cg01404197 | ZW10       | -4.235 | 107 | 55  | 3.79E-04 |
| cg01573562 | RPH3A      | -2.582 | 44  | 118 | 3.79E-04 |
| cg07289581 | MRPS35     | -4.723 | 81  | 81  | 3.79E-04 |
| cg07243932 | SLC30A4    | -6.174 | 79  | 83  | 3.80E-04 |
| cg21092687 | RECQL4     | -4.099 | 106 | 56  | 3.80E-04 |

|            |                 |        |     |     |          |
|------------|-----------------|--------|-----|-----|----------|
| cg08487374 | <i>TSC22D4</i>  | -4.947 | 57  | 105 | 3.80E-04 |
| cg21154823 | <i>RAI16</i>    | -5.319 | 51  | 111 | 3.80E-04 |
| cg22529861 | <i>GALNTL4</i>  | -4.796 | 51  | 111 | 3.81E-04 |
| cg25716286 | <i>MED18</i>    | -5.422 | 47  | 115 | 3.83E-04 |
| cg12201164 | <i>C20orf3</i>  | -6.205 | 41  | 121 | 3.83E-04 |
| cg05218490 | <i>ORC4L</i>    | -3.388 | 91  | 71  | 3.83E-04 |
| cg00432979 | <i>MRP63</i>    | -5.221 | 52  | 110 | 3.83E-04 |
| cg24216915 | <i>WDR18</i>    | -5.340 | 61  | 101 | 3.83E-04 |
| cg08946989 | <i>TBC1D7</i>   | -6.227 | 55  | 107 | 3.83E-04 |
| cg06502868 | <i>H3F3B</i>    | -5.692 | 51  | 111 | 3.84E-04 |
| cg10214058 | <i>CNOT8</i>    | -4.213 | 60  | 102 | 3.84E-04 |
| cg24022301 | <i>PTGFR</i>    | -3.494 | 86  | 76  | 3.84E-04 |
| cg20301340 | <i>MGC20255</i> | -5.538 | 118 | 44  | 3.84E-04 |
| cg10830758 | <i>C10orf4</i>  | -4.161 | 74  | 88  | 3.84E-04 |
| cg18175410 | <i>C18orf8</i>  | -6.011 | 74  | 88  | 3.84E-04 |
| cg26661257 | <i>HIF1A</i>    | -5.002 | 62  | 100 | 3.84E-04 |
| cg25632001 | <i>MRPL36</i>   | -4.799 | 114 | 48  | 3.85E-04 |
| cg00035623 | <i>UBE2S</i>    | -3.141 | 64  | 98  | 3.85E-04 |
| cg15774133 | <i>EIF3S8</i>   | -2.522 | 64  | 98  | 3.85E-04 |
| cg03290040 | <i>C22orf16</i> | -5.417 | 105 | 57  | 3.85E-04 |
| cg25098644 | <i>SUZ12</i>    | -4.696 | 37  | 125 | 3.85E-04 |
| cg04555836 | <i>MYO6</i>     | -3.442 | 89  | 73  | 3.86E-04 |
| cg20284673 | <i>DOM3Z</i>    | -1.963 | 107 | 55  | 3.86E-04 |
| cg19098826 | <i>BIRC6</i>    | -4.925 | 78  | 84  | 3.86E-04 |
| cg04444006 | <i>ZNF289</i>   | -4.271 | 63  | 99  | 3.86E-04 |
| cg26989531 | <i>CCND2</i>    | -1.905 | 80  | 82  | 3.86E-04 |
| cg20839219 | <i>SLC39A6</i>  | -4.484 | 68  | 94  | 3.86E-04 |
| cg07327328 | <i>CEP250</i>   | -3.459 | 49  | 113 | 3.86E-04 |
| cg12275348 | <i>SOCS2</i>    | -5.229 | 87  | 75  | 3.86E-04 |
| cg07061145 | <i>DNAJA4</i>   | 2.282  | 75  | 87  | 3.87E-04 |
| cg07054788 | <i>RPL5</i>     | -5.294 | 120 | 42  | 3.87E-04 |
| cg02499249 | <i>RARB</i>     | -3.473 | 40  | 122 | 3.87E-04 |
| cg19485804 | <i>NGEF</i>     | 1.868  | 54  | 108 | 3.87E-04 |
| cg22377428 | <i>GPR142</i>   | 2.529  | 92  | 70  | 3.88E-04 |
| cg09009042 | <i>PPP1R8</i>   | -4.512 | 93  | 69  | 3.88E-04 |
| cg12391174 | <i>FLJ20489</i> | -5.176 | 106 | 56  | 3.89E-04 |
| cg24909975 | <i>WTAP</i>     | -5.597 | 82  | 80  | 3.89E-04 |
| cg20216935 | <i>TGFBP2</i>   | -4.902 | 28  | 134 | 3.89E-04 |
| cg14142521 | <i>TAF11</i>    | -3.983 | 50  | 112 | 3.91E-04 |
| cg03631076 | <i>BANP</i>     | -4.979 | 81  | 81  | 3.91E-04 |
| cg16326979 | <i>OXR1</i>     | -5.868 | 80  | 82  | 3.91E-04 |
| cg06353318 | <i>OTOP2</i>    | -2.928 | 47  | 115 | 3.91E-04 |
| cg16794633 | <i>C3orf58</i>  | -4.697 | 83  | 79  | 3.91E-04 |
| cg04108502 | <i>CDK2</i>     | -5.169 | 97  | 65  | 3.91E-04 |
| cg15503799 | <i>PRCC</i>     | -4.343 | 89  | 73  | 3.91E-04 |
| cg14931645 | <i>ZNF672</i>   | -4.692 | 53  | 109 | 3.92E-04 |
| cg05065690 | <i>DDX23</i>    | -4.103 | 63  | 99  | 3.92E-04 |
| cg00955230 | <i>RFC2</i>     | -4.176 | 78  | 84  | 3.92E-04 |
| cg04028573 | <i>POMZP3</i>   | -5.271 | 89  | 73  | 3.92E-04 |
| cg13958676 | <i>LGI3</i>     | -4.658 | 40  | 122 | 3.93E-04 |
| cg01254459 | <i>PSMC6</i>    | -5.337 | 90  | 72  | 3.93E-04 |
| cg14513226 | <i>LPGAT1</i>   | -4.860 | 35  | 127 | 3.93E-04 |
| cg15451100 | <i>PSMB8</i>    | -5.500 | 72  | 90  | 3.93E-04 |
| cg04856685 | <i>MAP4</i>     | -4.605 | 60  | 102 | 3.93E-04 |
| cg11628487 | <i>SET</i>      | -3.941 | 31  | 131 | 3.93E-04 |

|            |                  |        |     |     |          |
|------------|------------------|--------|-----|-----|----------|
| cg17021265 | <i>CD2AP</i>     | -3.257 | 66  | 96  | 3.94E-04 |
| cg23172864 | <i>GOPC</i>      | -5.199 | 78  | 84  | 3.94E-04 |
| cg18240496 | <i>SCAMP1</i>    | -5.269 | 47  | 115 | 3.94E-04 |
| cg19393233 | <i>ERV3</i>      | 3.600  | 50  | 112 | 3.94E-04 |
| cg00554173 | <i>ProSAPiP1</i> | 1.606  | 111 | 51  | 3.94E-04 |
| cg09730361 | <i>MLLT3</i>     | -5.087 | 69  | 93  | 3.94E-04 |
| cg10095719 | <i>NRP1</i>      | -4.190 | 90  | 72  | 3.94E-04 |
| cg17853587 | <i>NDST3</i>     | -4.218 | 74  | 88  | 3.94E-04 |
| cg22657536 | <i>LSM16</i>     | -4.097 | 53  | 109 | 3.95E-04 |
| cg13836770 | <i>TNFRSF1B</i>  | -4.189 | 88  | 74  | 3.95E-04 |
| cg07114024 | <i>BAHD1</i>     | -5.007 | 110 | 52  | 3.96E-04 |
| cg12888039 | <i>ADIPOR1</i>   | -5.461 | 56  | 106 | 3.96E-04 |
| cg13752005 | <i>CCDC64</i>    | -4.964 | 112 | 50  | 3.96E-04 |
| cg01462904 | <i>CCDC12</i>    | -5.220 | 64  | 98  | 3.96E-04 |
| cg11264817 | <i>KIF1C</i>     | -6.007 | 62  | 100 | 3.97E-04 |
| cg15025769 | <i>MYO9A</i>     | -6.141 | 80  | 82  | 3.97E-04 |
| cg22475430 | <i>ATN1</i>      | -4.538 | 30  | 132 | 3.97E-04 |
| cg16718094 | <i>SAP30</i>     | -6.156 | 95  | 67  | 3.97E-04 |
| cg22031736 | <i>LOC129138</i> | -4.851 | 47  | 115 | 3.98E-04 |
| cg01428678 | <i>GPHN</i>      | -3.970 | 87  | 75  | 3.99E-04 |
| cg17336076 | <i>FAM35A</i>    | -2.548 | 103 | 59  | 3.99E-04 |
| cg18546419 | <i>RAP80</i>     | -4.111 | 51  | 111 | 3.99E-04 |
| cg14718680 | <i>PGD</i>       | -4.399 | 96  | 66  | 3.99E-04 |
| cg20084646 | <i>HSPC023</i>   | -6.354 | 61  | 101 | 3.99E-04 |
| cg22307908 | <i>ZNF264</i>    | -5.283 | 63  | 99  | 3.99E-04 |
| cg16961092 | <i>KIAA1737</i>  | -5.798 | 61  | 101 | 3.99E-04 |
| cg26627486 | <i>C7orf27</i>   | -3.994 | 61  | 101 | 3.99E-04 |
| cg19189291 | <i>MYH3</i>      | 2.214  | 78  | 84  | 4.00E-04 |
| cg06154570 | <i>HEYL</i>      | -1.684 | 94  | 68  | 4.00E-04 |
| cg04336379 | <i>LOC389458</i> | -2.290 | 110 | 39  | 4.00E-04 |
| cg18208268 | <i>RPL13A</i>    | -4.952 | 46  | 116 | 4.01E-04 |
| cg09327628 | <i>MARCKSL1</i>  | -5.031 | 57  | 105 | 4.02E-04 |
| cg14773259 | <i>C1orf19</i>   | -5.512 | 54  | 108 | 4.02E-04 |
| cg20340596 | <i>HPS1</i>      | 2.398  | 67  | 95  | 4.02E-04 |
| cg01491225 | <i>ZCCHC9</i>    | -5.339 | 106 | 56  | 4.02E-04 |
| cg11876919 | <i>HMG20A</i>    | -4.742 | 78  | 84  | 4.02E-04 |
| cg22704775 | <i>FEN1</i>      | -4.936 | 50  | 112 | 4.02E-04 |
| cg14865516 | <i>PAIP1</i>     | -4.292 | 89  | 73  | 4.02E-04 |
| cg22816171 | <i>DDX50</i>     | -3.981 | 75  | 87  | 4.04E-04 |
| cg13453139 | <i>PIK3R5</i>    | 1.552  | 108 | 54  | 4.04E-04 |
| cg18678185 | <i>KDELR1</i>    | -3.259 | 124 | 38  | 4.04E-04 |
| cg09976774 | <i>FOXM1</i>     | -4.317 | 103 | 59  | 4.04E-04 |
| cg07989514 | <i>C14orf4</i>   | -5.474 | 81  | 81  | 4.04E-04 |
| cg00483154 | <i>DDX41</i>     | -4.884 | 71  | 91  | 4.05E-04 |
| cg10429262 | <i>GPR157</i>    | -3.849 | 78  | 84  | 4.05E-04 |
| cg09199317 | <i>FRAT2</i>     | -5.341 | 86  | 76  | 4.06E-04 |
| cg15984661 | <i>CCDC8</i>     | -3.780 | 65  | 97  | 4.07E-04 |
| cg04418752 | <i>PAICS</i>     | -4.417 | 63  | 99  | 4.08E-04 |
| cg26147657 | <i>FLJ13946</i>  | -4.836 | 37  | 125 | 4.08E-04 |
| cg25856179 | <i>STAT1</i>     | -5.456 | 56  | 106 | 4.09E-04 |
| cg17038116 | <i>ASH1L</i>     | -3.905 | 66  | 96  | 4.09E-04 |
| cg21048501 | <i>MRPS24</i>    | -4.516 | 87  | 75  | 4.09E-04 |
| cg09918512 | <i>CWF19L2</i>   | 3.588  | 150 | 12  | 4.10E-04 |
| cg13946500 | <i>PPAN</i>      | -4.762 | 97  | 65  | 4.10E-04 |
| cg03243895 | <i>SPTAN1</i>    | -5.775 | 83  | 79  | 4.10E-04 |

|            |                  |        |     |     |          |
|------------|------------------|--------|-----|-----|----------|
| cg26328002 | <i>APCDD1</i>    | -4.141 | 76  | 86  | 4.10E-04 |
| cg01568335 | <i>COX5B</i>     | -4.447 | 118 | 44  | 4.11E-04 |
| cg00655779 | <i>CCT7</i>      | -5.190 | 91  | 71  | 4.11E-04 |
| cg26430450 | <i>RAB23</i>     | -4.903 | 80  | 82  | 4.12E-04 |
| cg07456645 | <i>C19orf30</i>  | -2.956 | 82  | 80  | 4.12E-04 |
| cg15584630 | <i>TSC22D2</i>   | -5.859 | 50  | 112 | 4.12E-04 |
| cg10912268 | <i>SPTLC1</i>    | -4.490 | 106 | 56  | 4.12E-04 |
| cg11399590 | <i>C20orf67</i>  | -4.955 | 51  | 111 | 4.12E-04 |
| cg16257091 | <i>BDNF</i>      | -2.965 | 36  | 126 | 4.13E-04 |
| cg14587868 | <i>TGM1</i>      | 0.830  | 110 | 52  | 4.13E-04 |
| cg14150666 | <i>IL8RB</i>     | 2.921  | 43  | 119 | 4.13E-04 |
| cg17714794 | <i>BNIP1</i>     | -4.386 | 62  | 100 | 4.14E-04 |
| cg19230917 | <i>C20orf24</i>  | -5.938 | 62  | 100 | 4.14E-04 |
| cg05008406 | <i>B4GALT4</i>   | -5.985 | 85  | 77  | 4.14E-04 |
| cg25858682 | <i>CCDC51</i>    | -5.053 | 72  | 90  | 4.14E-04 |
| cg03874199 | <i>HOXD12</i>    | -3.802 | 80  | 82  | 4.15E-04 |
| cg01169778 | <i>GBGT1</i>     | 0.894  | 78  | 84  | 4.15E-04 |
| cg02387854 | <i>ANAPC11</i>   | -6.456 | 49  | 113 | 4.15E-04 |
| cg04383274 | <i>C21orf55</i>  | -3.964 | 67  | 95  | 4.15E-04 |
| cg02162950 | <i>KIAA1008</i>  | -5.178 | 101 | 61  | 4.16E-04 |
| cg08404227 | <i>SLCO3A1</i>   | -5.392 | 61  | 101 | 4.16E-04 |
| cg10732834 | <i>KIAA1632</i>  | 1.675  | 111 | 51  | 4.16E-04 |
| cg15690721 | <i>ZNF85</i>     | -4.224 | 70  | 92  | 4.16E-04 |
| cg11158729 | <i>CNNM4</i>     | -4.539 | 68  | 94  | 4.16E-04 |
| cg06253734 | <i>ADAM10</i>    | -4.717 | 75  | 87  | 4.16E-04 |
| cg07383972 | <i>NUP205</i>    | -4.810 | 35  | 127 | 4.16E-04 |
| cg04136480 | <i>BAT1</i>      | -4.771 | 58  | 104 | 4.16E-04 |
| cg15077637 | <i>EFTUD2</i>    | -4.208 | 85  | 77  | 4.16E-04 |
| cg08466074 | <i>SMAP</i>      | -3.243 | 57  | 105 | 4.17E-04 |
| cg11469137 | <i>PLOD1</i>     | -4.950 | 90  | 72  | 4.17E-04 |
| cg01982455 | <i>RPS14</i>     | -4.683 | 38  | 124 | 4.17E-04 |
| cg23861715 | <i>CDC14B</i>    | -2.770 | 91  | 71  | 4.18E-04 |
| cg18577494 | <i>MGC22793</i>  | -4.484 | 69  | 93  | 4.18E-04 |
| cg23134520 | <i>ACOT8</i>     | -5.495 | 97  | 65  | 4.18E-04 |
| cg03833566 | <i>C3orf54</i>   | -4.170 | 103 | 59  | 4.19E-04 |
| cg23508052 | <i>SCD</i>       | -4.977 | 94  | 68  | 4.19E-04 |
| cg01819572 | <i>IL17RD</i>    | -4.422 | 69  | 93  | 4.19E-04 |
| cg03570976 | <i>CES2</i>      | -5.489 | 55  | 107 | 4.19E-04 |
| cg17248183 | <i>LOC162427</i> | -4.727 | 50  | 112 | 4.19E-04 |
| cg08737421 | <i>MAX</i>       | -5.030 | 61  | 101 | 4.19E-04 |
| cg10215079 | <i>TAC3</i>      | 2.079  | 105 | 57  | 4.19E-04 |
| cg13812587 | <i>TMEM15</i>    | -4.490 | 64  | 98  | 4.19E-04 |
| cg01990225 | <i>LMAN2L</i>    | -3.455 | 83  | 79  | 4.20E-04 |
| cg14634319 | <i>BAZ2A</i>     | -4.271 | 75  | 87  | 4.20E-04 |
| cg17891123 | <i>IQGAP1</i>    | -1.967 | 64  | 98  | 4.20E-04 |
| cg03794550 | <i>FANCF</i>     | -4.727 | 62  | 100 | 4.20E-04 |
| cg08321272 | <i>SLC30A9</i>   | -6.180 | 45  | 117 | 4.21E-04 |
| cg16941656 | <i>FRY</i>       | -5.184 | 46  | 116 | 4.21E-04 |
| cg27559343 | <i>SETD3</i>     | -4.830 | 52  | 110 | 4.21E-04 |
| cg11221508 | <i>CCT6B</i>     | -5.882 | 86  | 76  | 4.21E-04 |
| cg01564343 | <i>TREML1</i>    | 1.084  | 36  | 126 | 4.21E-04 |
| cg06100991 | <i>ELOVL6</i>    | -5.128 | 82  | 80  | 4.21E-04 |
| cg24121436 | <i>RTN1</i>      | -4.610 | 75  | 87  | 4.22E-04 |
| cg03169715 | <i>HAS3</i>      | -5.198 | 44  | 118 | 4.22E-04 |
| cg12598575 | <i>FAM44B</i>    | -5.888 | 109 | 53  | 4.22E-04 |

|            |          |        |     |     |          |
|------------|----------|--------|-----|-----|----------|
| cg01340005 | SOX2     | -4.394 | 96  | 66  | 4.22E-04 |
| cg03085637 | PEX11B   | -5.478 | 105 | 57  | 4.22E-04 |
| cg00435408 | RSPRY1   | -3.752 | 130 | 32  | 4.22E-04 |
| cg03861428 | SDHB     | -6.015 | 75  | 87  | 4.22E-04 |
| cg20376899 | EDN1     | -4.851 | 73  | 89  | 4.22E-04 |
| cg24353466 | RNF13    | -6.051 | 56  | 106 | 4.22E-04 |
| cg20319264 | NIPSNAP1 | -4.976 | 51  | 111 | 4.22E-04 |
| cg01137708 | NFKB1    | -5.287 | 59  | 103 | 4.23E-04 |
| cg13564075 | PHF12    | -5.971 | 115 | 47  | 4.23E-04 |
| cg23274123 | C1orf96  | -5.313 | 84  | 78  | 4.23E-04 |
| cg06922130 | KIF2C    | -4.341 | 122 | 40  | 4.23E-04 |
| cg01585758 | SUMO1    | -3.222 | 104 | 58  | 4.24E-04 |
| cg09447105 | PDE6H    | 2.966  | 60  | 102 | 4.24E-04 |
| cg14013604 | PTPN2    | -4.697 | 64  | 98  | 4.24E-04 |
| cg19574488 | FHIT     | -2.382 | 88  | 74  | 4.24E-04 |
| cg08221207 | FEZ1     | -3.834 | 103 | 59  | 4.25E-04 |
| cg13901134 | C9orf16  | -5.456 | 76  | 86  | 4.25E-04 |
| cg06625414 | SLC4A3   | -5.508 | 74  | 88  | 4.25E-04 |
| cg16900022 | MDN1     | -5.817 | 58  | 104 | 4.25E-04 |
| cg21019820 | DALRD3   | -5.433 | 55  | 107 | 4.26E-04 |
| cg02532648 | BTG3     | -5.198 | 108 | 54  | 4.26E-04 |
| cg16479674 | ZNF672   | -4.878 | 55  | 107 | 4.27E-04 |
| cg00155485 | THRAP2   | -5.005 | 69  | 93  | 4.28E-04 |
| cg02655204 | RB1      | 0.988  | 112 | 50  | 4.28E-04 |
| cg12573766 | RPS3     | -5.167 | 94  | 68  | 4.28E-04 |
| cg13510363 | ANKS1A   | -4.733 | 78  | 84  | 4.28E-04 |
| cg16051685 | TRIM63   | 1.759  | 100 | 62  | 4.28E-04 |
| cg22501393 | ALKBH6   | -4.133 | 88  | 74  | 4.28E-04 |
| cg08749122 | TARSL1   | -4.861 | 73  | 89  | 4.29E-04 |
| cg24995381 | GPR141   | 3.224  | 76  | 86  | 4.29E-04 |
| cg13581941 | CDC23    | -6.192 | 66  | 96  | 4.29E-04 |
| cg18213440 | TFG      | -4.998 | 42  | 120 | 4.29E-04 |
| cg03742003 | SLIT2    | -3.095 | 77  | 85  | 4.29E-04 |
| cg01478450 | SLC29A3  | -4.298 | 67  | 95  | 4.30E-04 |
| cg09405612 | GLI3     | -5.300 | 102 | 60  | 4.30E-04 |
| cg13180809 | HPS1     | -3.585 | 60  | 102 | 4.30E-04 |
| cg15857475 | RECQL4   | -5.535 | 95  | 67  | 4.30E-04 |
| cg22108265 | RAB6A    | -4.345 | 72  | 90  | 4.30E-04 |
| cg02806658 | C12orf48 | -5.063 | 91  | 71  | 4.30E-04 |
| cg16273524 | THUMPD2  | -5.361 | 71  | 91  | 4.31E-04 |
| cg18357098 | C3orf19  | -6.087 | 81  | 81  | 4.31E-04 |
| cg25098401 | LCE2B    | 0.670  | 43  | 119 | 4.31E-04 |
| cg15104484 | PEX26    | -4.780 | 53  | 109 | 4.31E-04 |
| cg25241845 | NEURL2   | -6.391 | 58  | 104 | 4.31E-04 |
| cg18282619 | ZNF706   | -4.523 | 95  | 67  | 4.32E-04 |
| cg10671066 | SLAMF6   | -2.482 | 82  | 79  | 4.32E-04 |
| cg12280407 | KCTD12   | -4.970 | 68  | 94  | 4.32E-04 |
| cg19995014 | APLP1    | -4.469 | 47  | 115 | 4.32E-04 |
| cg25781202 | RNF122   | -5.522 | 100 | 62  | 4.33E-04 |
| cg07328579 | GLT8D2   | -3.039 | 83  | 79  | 4.33E-04 |
| cg25225073 | KCNK13   | -4.428 | 44  | 118 | 4.33E-04 |
| cg17904786 | GTF3A    | -4.682 | 87  | 75  | 4.33E-04 |
| cg23512028 | RBAK     | -4.848 | 82  | 80  | 4.33E-04 |
| cg07489134 | HELLS    | -5.026 | 92  | 70  | 4.34E-04 |
| cg05729093 | IL4R     | -2.713 | 51  | 111 | 4.34E-04 |

|            |                  |        |     |     |          |
|------------|------------------|--------|-----|-----|----------|
| cg06803184 | <i>FH</i>        | -4.841 | 66  | 96  | 4.34E-04 |
| cg07614786 | <i>TTLL3</i>     | 3.086  | 129 | 33  | 4.34E-04 |
| cg19298821 | <i>FLJ27505</i>  | 2.690  | 56  | 106 | 4.34E-04 |
| cg03474731 | <i>CHEK1</i>     | -4.390 | 49  | 113 | 4.34E-04 |
| cg15768270 | <i>NUDT22</i>    | -5.119 | 110 | 52  | 4.34E-04 |
| cg06926735 | <i>UBE2V1</i>    | -4.764 | 45  | 117 | 4.34E-04 |
| cg08049198 | <i>AGPAT1</i>    | -4.634 | 59  | 103 | 4.34E-04 |
| cg25122941 | <i>VPS39</i>     | -5.601 | 92  | 70  | 4.36E-04 |
| cg03135598 | <i>SEPW1</i>     | -6.152 | 89  | 73  | 4.36E-04 |
| cg10423830 | <i>PGEA1</i>     | -4.190 | 66  | 96  | 4.36E-04 |
| cg06269753 | <i>MSC</i>       | -2.419 | 89  | 73  | 4.36E-04 |
| cg27555776 | <i>OPTN</i>      | -5.133 | 86  | 76  | 4.36E-04 |
| cg09296044 | <i>CCNDBP1</i>   | -5.657 | 76  | 86  | 4.36E-04 |
| cg06836849 | <i>SLC17A8</i>   | -1.365 | 92  | 70  | 4.37E-04 |
| cg05869585 | <i>PMM2</i>      | 3.066  | 85  | 77  | 4.37E-04 |
| cg08233088 | <i>C15orf15</i>  | -4.246 | 35  | 127 | 4.37E-04 |
| cg23197881 | <i>RAB3IP</i>    | -5.404 | 86  | 76  | 4.37E-04 |
| cg22432367 | <i>ARID1B</i>    | -4.133 | 91  | 71  | 4.38E-04 |
| cg00211661 | <i>CENTD2</i>    | -4.416 | 80  | 82  | 4.38E-04 |
| cg10784821 | <i>COQ6</i>      | 2.803  | 30  | 132 | 4.38E-04 |
| cg21380294 | <i>ZSCAN2</i>    | -3.605 | 106 | 56  | 4.39E-04 |
| cg01150454 | <i>MRPS5</i>     | -6.266 | 90  | 72  | 4.39E-04 |
| cg17869167 | <i>IL18R1</i>    | 2.627  | 75  | 87  | 4.39E-04 |
| cg23481221 | <i>TOMM34</i>    | -4.964 | 38  | 124 | 4.40E-04 |
| cg03940966 | <i>THEM4</i>     | -5.061 | 69  | 93  | 4.40E-04 |
| cg05004940 | <i>C20orf195</i> | -4.616 | 81  | 81  | 4.41E-04 |
| cg21985356 | <i>ZBED3</i>     | -4.775 | 76  | 86  | 4.41E-04 |
| cg14541950 | <i>HIST3H2BB</i> | -5.377 | 62  | 100 | 4.41E-04 |
| cg03513163 | <i>PCDHB1</i>    | -3.566 | 108 | 54  | 4.41E-04 |
| cg09514188 | <i>TOB1</i>      | -4.599 | 56  | 106 | 4.41E-04 |
| cg22874046 | <i>ICAM1</i>     | -5.944 | 58  | 104 | 4.41E-04 |
| cg15645784 | <i>FLJ22386</i>  | -5.567 | 59  | 103 | 4.42E-04 |
| cg09446127 | <i>UBADC1</i>    | -4.272 | 111 | 51  | 4.42E-04 |
| cg24130043 | <i>ZNF197</i>    | -4.689 | 63  | 99  | 4.42E-04 |
| cg01932459 | <i>CD164</i>     | -7.213 | 85  | 77  | 4.42E-04 |
| cg27182555 | <i>THAP9</i>     | -5.490 | 75  | 87  | 4.42E-04 |
| cg13236637 | <i>SURB7</i>     | -5.517 | 74  | 88  | 4.42E-04 |
| cg24744425 | <i>RABIF</i>     | -4.947 | 57  | 105 | 4.42E-04 |
| cg07448460 | <i>GGH</i>       | -4.416 | 94  | 68  | 4.43E-04 |
| cg18871670 | <i>ANAPC13</i>   | -5.302 | 48  | 114 | 4.43E-04 |
| cg14556189 | <i>SMAD3</i>     | -5.918 | 98  | 64  | 4.43E-04 |
| cg08661290 | <i>PHF13</i>     | -3.973 | 112 | 50  | 4.43E-04 |
| cg14934766 | <i>CENPA</i>     | -4.802 | 116 | 46  | 4.44E-04 |
| cg06194186 | <i>CPO</i>       | 1.283  | 65  | 97  | 4.44E-04 |
| cg17488985 | <i>NT5E</i>      | -4.244 | 86  | 76  | 4.44E-04 |
| cg11649654 | <i>ERCC8</i>     | -4.046 | 34  | 128 | 4.44E-04 |
| cg24857117 | <i>PSMB5</i>     | -3.888 | 91  | 71  | 4.44E-04 |
| cg00309056 | <i>STARD3NL</i>  | -4.819 | 58  | 104 | 4.44E-04 |
| cg01470283 | <i>SCAND1</i>    | -5.739 | 75  | 87  | 4.44E-04 |
| cg08222662 | <i>ZC3HAV1</i>   | -3.630 | 43  | 119 | 4.44E-04 |
| cg03469158 | <i>MMP8</i>      | 1.799  | 101 | 61  | 4.45E-04 |
| cg04223956 | <i>NEK7</i>      | 3.255  | 56  | 106 | 4.45E-04 |
| cg18504532 | <i>RABGAP1L</i>  | -4.659 | 48  | 114 | 4.45E-04 |
| cg23230018 | <i>F25965</i>    | -3.419 | 71  | 91  | 4.45E-04 |
| cg16222698 | <i>REXO2</i>     | -5.210 | 107 | 55  | 4.46E-04 |

|            |                  |        |     |     |          |
|------------|------------------|--------|-----|-----|----------|
| cg17367215 | <i>SUPT5H</i>    | -3.616 | 40  | 122 | 4.46E-04 |
| cg23616377 | <i>CA8</i>       | -4.391 | 79  | 83  | 4.47E-04 |
| cg02990567 | <i>RGL2</i>      | -5.179 | 106 | 56  | 4.47E-04 |
| cg16267059 | <i>MFAP1</i>     | -4.159 | 101 | 61  | 4.47E-04 |
| cg22479947 | <i>CARS</i>      | -5.566 | 64  | 98  | 4.47E-04 |
| cg04254119 | <i>AKAP3</i>     | 3.032  | 75  | 87  | 4.47E-04 |
| cg12808992 | <i>ULBP2</i>     | -4.411 | 60  | 102 | 4.47E-04 |
| cg16652241 | <i>MMP15</i>     | -3.964 | 97  | 65  | 4.47E-04 |
| cg02385791 | <i>ZNF570</i>    | -4.294 | 106 | 56  | 4.48E-04 |
| cg06587969 | <i>WDR79</i>     | -5.216 | 44  | 118 | 4.49E-04 |
| cg10485724 | <i>PMS2</i>      | -4.845 | 44  | 118 | 4.50E-04 |
| cg01308601 | <i>C12orf49</i>  | -3.715 | 81  | 81  | 4.50E-04 |
| cg08865050 | <i>DDX12</i>     | -4.503 | 37  | 125 | 4.50E-04 |
| cg12717594 | <i>RECK</i>      | -5.463 | 105 | 57  | 4.50E-04 |
| cg06611744 | <i>RASL11A</i>   | -4.119 | 86  | 76  | 4.50E-04 |
| cg20415809 | <i>ITGA4</i>     | -4.217 | 52  | 110 | 4.50E-04 |
| cg00945862 | <i>SLC4A5</i>    | 2.816  | 49  | 113 | 4.50E-04 |
| cg22467071 | <i>PECAM1</i>    | -0.294 | 61  | 101 | 4.50E-04 |
| cg00657582 | <i>CHD8</i>      | -3.807 | 106 | 56  | 4.50E-04 |
| cg14424111 | <i>C20orf77</i>  | -5.032 | 82  | 80  | 4.50E-04 |
| cg13455369 | <i>FAM44A</i>    | -5.361 | 64  | 98  | 4.50E-04 |
| cg18604888 | <i>ATAD2</i>     | -4.071 | 78  | 84  | 4.51E-04 |
| cg18174542 | <i>CSDC2</i>     | -2.318 | 76  | 86  | 4.52E-04 |
| cg16639637 | <i>TUBGCP5</i>   | -5.065 | 75  | 87  | 4.52E-04 |
| cg00973286 | <i>TNFRSF1A</i>  | -4.494 | 88  | 74  | 4.52E-04 |
| cg24616461 | <i>PRR11</i>     | -4.729 | 65  | 97  | 4.52E-04 |
| cg08839620 | <i>POLD3</i>     | -5.056 | 29  | 133 | 4.53E-04 |
| cg19118533 | <i>TRAF3IP2</i>  | -4.010 | 89  | 73  | 4.53E-04 |
| cg01195053 | <i>LOC124216</i> | -3.845 | 86  | 76  | 4.53E-04 |
| cg08606356 | <i>CD44</i>      | -3.469 | 71  | 91  | 4.53E-04 |
| cg11594228 | <i>RANBP1</i>    | 0.406  | 89  | 73  | 4.53E-04 |
| cg19426277 | <i>GPR146</i>    | 3.561  | 51  | 111 | 4.53E-04 |
| cg18372353 | <i>ATPBD4</i>    | -5.039 | 39  | 123 | 4.54E-04 |
| cg17660655 | <i>HIST3H2A</i>  | -3.115 | 141 | 21  | 4.54E-04 |
| cg09049660 | <i>PANK2</i>     | -4.046 | 73  | 89  | 4.54E-04 |
| cg21721126 | <i>KIAA0103</i>  | -5.680 | 37  | 125 | 4.54E-04 |
| cg25194415 | <i>KIAA0232</i>  | -5.214 | 61  | 101 | 4.54E-04 |
| cg13031432 | <i>NDRG4</i>     | -5.379 | 64  | 98  | 4.54E-04 |
| cg01723747 | <i>C16orf34</i>  | -3.030 | 24  | 138 | 4.55E-04 |
| cg01675895 | <i>AFM</i>       | 2.125  | 79  | 83  | 4.55E-04 |
| cg13725272 | <i>MAGI1</i>     | -5.912 | 72  | 90  | 4.55E-04 |
| cg09768944 | <i>PDCL</i>      | -4.101 | 85  | 77  | 4.55E-04 |
| cg12733079 | <i>ZNF277</i>    | -4.492 | 67  | 95  | 4.55E-04 |
| cg08307816 | <i>DEGS2</i>     | -3.968 | 82  | 80  | 4.55E-04 |
| cg24189717 | <i>SNX17</i>     | -3.906 | 95  | 67  | 4.55E-04 |
| cg14946299 | <i>ZNF273</i>    | -3.719 | 105 | 57  | 4.56E-04 |
| cg09630404 | <i>STAR</i>      | -4.235 | 72  | 90  | 4.56E-04 |
| cg15059511 | <i>DNAJC17</i>   | -5.184 | 86  | 76  | 4.56E-04 |
| cg22623062 | <i>TP53I11</i>   | -4.650 | 59  | 103 | 4.56E-04 |
| cg12018696 | <i>SFRS10</i>    | -4.358 | 108 | 54  | 4.57E-04 |
| cg14175580 | <i>CAMSAP1L1</i> | -4.861 | 46  | 116 | 4.57E-04 |
| cg00079563 | <i>ARFGAP3</i>   | -6.048 | 119 | 43  | 4.57E-04 |
| cg17808849 | <i>HERPUD1</i>   | -4.659 | 89  | 73  | 4.57E-04 |
| cg10252059 | <i>CYP20A1</i>   | -4.580 | 55  | 107 | 4.58E-04 |
| cg04798158 | <i>C14orf111</i> | -5.194 | 93  | 69  | 4.58E-04 |

|            |                 |        |     |     |          |
|------------|-----------------|--------|-----|-----|----------|
| cg06418219 | <i>SHC1</i>     | -4.560 | 96  | 66  | 4.58E-04 |
| cg00051623 | <i>CASP1</i>    | 2.841  | 106 | 56  | 4.58E-04 |
| cg07347725 | <i>C9orf18</i>  | -3.802 | 48  | 114 | 4.58E-04 |
| cg11453347 | <i>BCCIP</i>    | -4.500 | 76  | 86  | 4.58E-04 |
| cg05621759 | <i>H-plk</i>    | 2.750  | 56  | 106 | 4.59E-04 |
| cg18006085 | <i>LRRC59</i>   | -5.166 | 59  | 103 | 4.59E-04 |
| cg01490535 | <i>FLJ10661</i> | -3.399 | 65  | 97  | 4.59E-04 |
| cg10911877 | <i>PAFAH1B1</i> | -4.597 | 94  | 68  | 4.59E-04 |
| cg01697732 | <i>FAM20A</i>   | -4.632 | 114 | 48  | 4.59E-04 |
| cg01273150 | <i>CORO1C</i>   | -4.292 | 103 | 59  | 4.59E-04 |
| cg17158059 | <i>MGC15407</i> | -4.531 | 86  | 76  | 4.60E-04 |
| cg13986130 | <i>PTGS2</i>    | -4.046 | 51  | 111 | 4.60E-04 |
| cg19469297 | <i>TBRG4</i>    | -4.110 | 87  | 75  | 4.60E-04 |
| cg02738763 | <i>TARSL2</i>   | -5.333 | 88  | 74  | 4.61E-04 |
| cg22226765 | <i>GGA3</i>     | -4.366 | 66  | 96  | 4.61E-04 |
| cg17812013 | <i>GPX4</i>     | -4.995 | 79  | 83  | 4.61E-04 |
| cg06975739 | <i>TAPBP</i>    | -2.579 | 81  | 79  | 4.61E-04 |
| cg00630583 | <i>POLE</i>     | -5.382 | 69  | 93  | 4.63E-04 |
| cg00815440 | <i>UQCRFS1</i>  | -6.570 | 43  | 119 | 4.63E-04 |
| cg00834796 | <i>JAKMIP2</i>  | -2.949 | 56  | 106 | 4.63E-04 |
| cg06495347 | <i>SUOX</i>     | -2.010 | 106 | 56  | 4.63E-04 |
| cg11398517 | <i>FAM112A</i>  | 0.522  | 22  | 140 | 4.64E-04 |
| cg18755783 | <i>SPG20</i>    | -4.395 | 79  | 83  | 4.64E-04 |
| cg14217102 | <i>RAB1A</i>    | -5.787 | 88  | 74  | 4.64E-04 |
| cg04232649 | <i>CCNG1</i>    | -4.598 | 107 | 55  | 4.64E-04 |
| cg20664201 | <i>INHBE</i>    | 0.538  | 50  | 112 | 4.65E-04 |
| cg13578400 | <i>RCD-8</i>    | -4.553 | 67  | 95  | 4.65E-04 |
| cg18329349 | <i>CAV1</i>     | -3.137 | 103 | 59  | 4.65E-04 |
| cg26131911 | <i>ZBTB8OS</i>  | -5.356 | 86  | 76  | 4.65E-04 |
| cg19168631 | <i>DAAM1</i>    | -5.908 | 30  | 132 | 4.65E-04 |
| cg04078251 | <i>KIF22</i>    | -4.323 | 82  | 80  | 4.65E-04 |
| cg22012054 | <i>ATP5B</i>    | -4.153 | 37  | 125 | 4.65E-04 |
| cg18602314 | <i>GFPT2</i>    | -5.259 | 44  | 118 | 4.65E-04 |
| cg18864581 | <i>ZWILCH</i>   | -3.940 | 102 | 60  | 4.66E-04 |
| cg08242493 | <i>MGEA5</i>    | -4.693 | 47  | 115 | 4.66E-04 |
| cg03718026 | <i>RPS20</i>    | -3.300 | 23  | 139 | 4.66E-04 |
| cg19259146 | <i>RPS6KA1</i>  | -4.407 | 85  | 77  | 4.66E-04 |
| cg06229674 | <i>ARP10</i>    | 2.806  | 50  | 112 | 4.66E-04 |
| cg08525481 | <i>OGFR</i>     | -5.753 | 58  | 104 | 4.67E-04 |
| cg23693510 | <i>ELAVL2</i>   | -3.950 | 89  | 73  | 4.67E-04 |
| cg14167596 | <i>MSX1</i>     | -3.575 | 83  | 79  | 4.67E-04 |
| cg12452010 | <i>C10orf22</i> | -4.022 | 89  | 73  | 4.67E-04 |
| cg06292277 | <i>CLCN3</i>    | -4.269 | 75  | 87  | 4.68E-04 |
| cg08497766 | <i>IL15RA</i>   | -4.375 | 111 | 51  | 4.68E-04 |
| cg13759143 | <i>EXPH5</i>    | -4.690 | 88  | 74  | 4.68E-04 |
| cg19483159 | <i>DYNLT1</i>   | -3.663 | 56  | 106 | 4.68E-04 |
| cg02756614 | <i>FER1L3</i>   | -4.611 | 30  | 132 | 4.69E-04 |
| cg00887547 | <i>TAOK3</i>    | -4.445 | 63  | 99  | 4.69E-04 |
| cg09143576 | <i>HKR3</i>     | -5.677 | 100 | 62  | 4.69E-04 |
| cg07540118 | <i>ADAM19</i>   | -4.159 | 36  | 126 | 4.70E-04 |
| cg09980622 | <i>BOLA1</i>    | -5.699 | 91  | 71  | 4.70E-04 |
| cg25181284 | <i>GPD1</i>     | 2.874  | 67  | 95  | 4.71E-04 |
| cg08604885 | <i>TRIM4</i>    | -4.730 | 131 | 31  | 4.71E-04 |
| cg05983247 | <i>SLTM</i>     | -6.429 | 81  | 81  | 4.71E-04 |
| cg02404843 | <i>KIAA1893</i> | -5.746 | 68  | 94  | 4.72E-04 |

|            |                   |        |     |     |          |
|------------|-------------------|--------|-----|-----|----------|
| cg14238120 | <i>ELA3A</i>      | 1.135  | 126 | 36  | 4.72E-04 |
| cg02171008 | <i>RPL27A</i>     | -5.943 | 74  | 88  | 4.72E-04 |
| cg20251973 | <i>MGC11266</i>   | -5.427 | 112 | 50  | 4.72E-04 |
| cg22247240 | <i>C14orf115</i>  | 1.087  | 76  | 86  | 4.72E-04 |
| cg26681081 | <i>CKAP1</i>      | -5.032 | 38  | 124 | 4.72E-04 |
| cg00410419 | <i>COMMD6</i>     | -4.872 | 52  | 110 | 4.72E-04 |
| cg16665103 | <i>COQ3</i>       | -3.939 | 62  | 100 | 4.72E-04 |
| cg22009138 | <i>ERBB2IP</i>    | -4.160 | 66  | 96  | 4.74E-04 |
| cg17341703 | <i>SLC35A1</i>    | -4.291 | 50  | 112 | 4.74E-04 |
| cg11483915 | <i>SLC40A1</i>    | -4.250 | 87  | 75  | 4.75E-04 |
| cg01216369 | <i>SPATA16</i>    | 3.271  | 115 | 47  | 4.75E-04 |
| cg02422627 | <i>THRAP6</i>     | -4.288 | 93  | 69  | 4.75E-04 |
| cg04747863 | <i>PRPSAP2</i>    | -5.446 | 53  | 109 | 4.75E-04 |
| cg15547662 | <i>PAFAH2</i>     | -3.965 | 82  | 80  | 4.75E-04 |
| cg18542098 | <i>FLJ36445</i>   | 0.954  | 70  | 92  | 4.75E-04 |
| cg08341978 | <i>RERE</i>       | -4.895 | 55  | 107 | 4.76E-04 |
| cg13994175 | <i>KIF9</i>       | -4.754 | 72  | 90  | 4.76E-04 |
| cg00717862 | <i>DNAJB11</i>    | -4.450 | 44  | 118 | 4.76E-04 |
| cg11806749 | <i>SUPT3H</i>     | -4.195 | 73  | 89  | 4.77E-04 |
| cg12716838 | <i>B3GALT3</i>    | -4.569 | 74  | 88  | 4.77E-04 |
| cg02100848 | <i>C3orf32</i>    | 1.409  | 109 | 53  | 4.77E-04 |
| cg22960185 | <i>TMEM38A</i>    | -5.128 | 64  | 98  | 4.77E-04 |
| cg17165760 | <i>ANKRD26</i>    | -4.971 | 52  | 110 | 4.78E-04 |
| cg12924262 | <i>CHPT1</i>      | -3.727 | 130 | 32  | 4.79E-04 |
| cg14401592 | <i>ACCN5</i>      | 1.101  | 142 | 20  | 4.80E-04 |
| cg10337772 | <i>KIAA1143</i>   | -4.882 | 85  | 77  | 4.80E-04 |
| cg13058581 | <i>PRDM10</i>     | -4.686 | 92  | 70  | 4.80E-04 |
| cg07559730 | <i>ZNF702</i>     | -4.166 | 83  | 79  | 4.80E-04 |
| cg09340639 | <i>FCRL1</i>      | -1.496 | 90  | 72  | 4.80E-04 |
| cg05786809 | <i>CKB</i>        | -4.508 | 102 | 60  | 4.81E-04 |
| cg11323230 | <i>AMFR</i>       | -5.344 | 61  | 101 | 4.81E-04 |
| cg11422541 | <i>ADCY6</i>      | -4.438 | 38  | 124 | 4.81E-04 |
| cg15853374 | <i>EIF3S6IP</i>   | -4.702 | 62  | 100 | 4.81E-04 |
| cg17872064 | <i>NOP5/NOP58</i> | -4.983 | 54  | 108 | 4.81E-04 |
| cg26824091 | <i>GLO1</i>       | -4.422 | 71  | 91  | 4.81E-04 |
| cg20163033 | <i>C4orf8</i>     | 1.368  | 47  | 115 | 4.81E-04 |
| cg23069305 | <i>SENPI</i>      | -3.308 | 64  | 98  | 4.82E-04 |
| cg09822001 | <i>APOA1BP</i>    | -4.600 | 96  | 66  | 4.82E-04 |
| cg05801648 | <i>SYK</i>        | -3.670 | 56  | 106 | 4.82E-04 |
| cg23110832 | <i>FAM100B</i>    | -4.795 | 77  | 85  | 4.83E-04 |
| cg04410834 | <i>ABCG4</i>      | -5.281 | 78  | 84  | 4.83E-04 |
| cg09404256 | <i>USF2</i>       | -4.243 | 95  | 67  | 4.83E-04 |
| cg12985418 | <i>MIB1</i>       | -4.986 | 63  | 99  | 4.84E-04 |
| cg10850119 | <i>FBXO4</i>      | -5.261 | 94  | 68  | 4.84E-04 |
| cg11109684 | <i>RAB10</i>      | -5.416 | 71  | 91  | 4.84E-04 |
| cg21032583 | <i>LMLN</i>       | 2.450  | 120 | 42  | 4.84E-04 |
| cg00336605 | <i>NR1H2</i>      | -4.149 | 86  | 76  | 4.84E-04 |
| cg02159896 | <i>MPPE1</i>      | -5.127 | 76  | 86  | 4.84E-04 |
| cg02850821 | <i>KRAS</i>       | -4.611 | 76  | 86  | 4.84E-04 |
| cg17475456 | <i>CLEC2B</i>     | -3.837 | 98  | 64  | 4.84E-04 |
| cg22544376 | <i>DGUOK</i>      | -5.695 | 58  | 104 | 4.84E-04 |
| cg25604883 | <i>AK5</i>        | -4.086 | 87  | 75  | 4.84E-04 |
| cg11904887 | <i>C1orf166</i>   | -3.417 | 50  | 112 | 4.85E-04 |
| cg09158909 | <i>C20orf29</i>   | -4.556 | 70  | 92  | 4.85E-04 |
| cg11084020 | <i>TAX1BP1</i>    | -5.801 | 100 | 62  | 4.85E-04 |

|            |           |        |     |     |          |
|------------|-----------|--------|-----|-----|----------|
| cg18413240 | SLC35A5   | -5.114 | 67  | 95  | 4.85E-04 |
| cg18458993 | ARG2      | -4.380 | 64  | 98  | 4.85E-04 |
| cg20657383 | CEACAM1   | 3.464  | 46  | 116 | 4.85E-04 |
| cg23736819 | LOC115648 | -3.612 | 87  | 75  | 4.86E-04 |
| cg06600412 | MLF1IP    | -5.983 | 30  | 132 | 4.86E-04 |
| cg02269221 | TRAF4     | -5.641 | 65  | 97  | 4.86E-04 |
| cg13113656 | CLTC      | -5.170 | 35  | 127 | 4.88E-04 |
| cg06250108 | LOC92691  | -4.215 | 83  | 79  | 4.88E-04 |
| cg07143898 | SLIT1     | -4.404 | 58  | 104 | 4.88E-04 |
| cg03630344 | VAMP3     | -5.095 | 56  | 106 | 4.89E-04 |
| cg23180365 | GLB1      | -6.059 | 81  | 81  | 4.89E-04 |
| cg11715903 | PLEKHC1   | -6.183 | 67  | 95  | 4.89E-04 |
| cg18329036 | C20orf155 | -3.988 | 74  | 88  | 4.89E-04 |
| cg25595446 | PRMT1     | -5.224 | 77  | 85  | 4.89E-04 |
| cg03644378 | CYB5D1    | -5.141 | 64  | 98  | 4.89E-04 |
| cg20930618 | VPS72     | -4.851 | 82  | 80  | 4.89E-04 |
| cg00368022 | FLJ11193  | -4.826 | 64  | 98  | 4.90E-04 |
| cg11419863 | FAU       | -4.542 | 131 | 31  | 4.90E-04 |
| cg27394038 | SFRS3     | -5.345 | 93  | 69  | 4.90E-04 |
| cg25615963 | EIF4G1    | -4.585 | 66  | 96  | 4.90E-04 |
| cg10887392 | CTDSP1    | -5.440 | 74  | 88  | 4.91E-04 |
| cg02550358 | PIGL      | -5.122 | 86  | 76  | 4.92E-04 |
| cg27167439 | C1orf21   | -3.968 | 79  | 83  | 4.92E-04 |
| cg02450959 | THAP1     | -4.836 | 76  | 86  | 4.92E-04 |
| cg14433673 | UCP2      | -6.129 | 48  | 114 | 4.93E-04 |
| cg06748315 | KRTAP19-3 | 2.918  | 88  | 74  | 4.93E-04 |
| cg17587934 | HNRPAB    | -5.766 | 96  | 66  | 4.93E-04 |
| cg07811750 | CAMTA2    | -5.641 | 40  | 122 | 4.93E-04 |
| cg14667033 | TMEM2     | -4.620 | 64  | 98  | 4.94E-04 |
| cg10863038 | OBFC2A    | -5.675 | 50  | 112 | 4.94E-04 |
| cg12623088 | MGC4562   | -3.766 | 51  | 111 | 4.94E-04 |
| cg08851943 | C6orf64   | -5.105 | 93  | 69  | 4.94E-04 |
| cg12745769 | LOC115648 | -5.109 | 73  | 89  | 4.94E-04 |
| cg08268266 | LITAF     | -3.627 | 99  | 62  | 4.94E-04 |
| cg12844497 | AURKB     | -4.430 | 90  | 72  | 4.94E-04 |
| cg04510262 | PTPN2     | -5.243 | 60  | 102 | 4.95E-04 |
| cg23226134 | CLCN6     | -4.358 | 46  | 116 | 4.95E-04 |
| cg24646710 | FLJ23191  | -4.676 | 73  | 89  | 4.95E-04 |
| cg05257610 | PRO1853   | -1.077 | 67  | 95  | 4.95E-04 |
| cg08462292 | PTBP2     | -5.119 | 69  | 93  | 4.95E-04 |
| cg18511989 | CPSF1     | -3.961 | 92  | 70  | 4.96E-04 |
| cg08608800 | KIAA0853  | -5.312 | 58  | 104 | 4.97E-04 |
| cg11991859 | NPAS3     | -5.165 | 92  | 70  | 4.97E-04 |
| cg21929875 | VSIG2     | 1.052  | 81  | 81  | 4.97E-04 |
| cg13325261 | ARNTL2    | -5.773 | 76  | 86  | 4.97E-04 |
| cg13150441 | RNF40     | -3.563 | 85  | 77  | 4.99E-04 |
| cg16169604 | GPR148    | -4.523 | 110 | 52  | 4.99E-04 |
| cg16833230 | DNTTIP2   | -5.159 | 88  | 74  | 4.99E-04 |
| cg13134662 | VAV2      | -3.796 | 71  | 91  | 4.99E-04 |
| cg25495394 | SAP18     | -5.397 | 112 | 50  | 5.00E-04 |
| cg17236617 | ACOT7     | -4.454 | 82  | 80  | 5.00E-04 |
| cg23281417 | STK17A    | -5.041 | 56  | 106 | 5.01E-04 |
| cg21070730 | EHD4      | -4.926 | 63  | 99  | 5.01E-04 |
| cg10130071 | GALNT1    | 2.907  | 90  | 72  | 5.01E-04 |
| cg21487067 | KIAA0152  | -5.185 | 83  | 79  | 5.01E-04 |

|            |                  |        |     |     |          |
|------------|------------------|--------|-----|-----|----------|
| cg11286163 | <i>PSMA5</i>     | -5.322 | 45  | 117 | 5.02E-04 |
| cg11715999 | <i>ATP5G1</i>    | -4.844 | 120 | 42  | 5.02E-04 |
| cg00930873 | <i>ALDH1A2</i>   | -3.057 | 65  | 97  | 5.03E-04 |
| cg26196700 | <i>SORD</i>      | -6.418 | 110 | 52  | 5.03E-04 |
| cg17841529 | <i>OSBPL8</i>    | -4.601 | 50  | 112 | 5.03E-04 |
| cg27486427 | <i>RARB</i>      | -4.028 | 105 | 57  | 5.03E-04 |
| cg01817393 | <i>GNAS</i>      | -0.816 | 61  | 101 | 5.05E-04 |
| cg06677660 | <i>DBP</i>       | -5.508 | 72  | 90  | 5.05E-04 |
| cg18160978 | <i>ZNF668</i>    | -4.466 | 115 | 47  | 5.05E-04 |
| cg18189601 | <i>RING1</i>     | -3.161 | 85  | 77  | 5.05E-04 |
| cg20406878 | <i>NR5A2</i>     | 0.615  | 81  | 81  | 5.05E-04 |
| cg26091119 | <i>HIAT1</i>     | -5.601 | 82  | 80  | 5.05E-04 |
| cg14645650 | <i>RUNX3</i>     | 5.103  | 75  | 87  | 5.05E-04 |
| cg01385430 | <i>VPS45A</i>    | -5.043 | 34  | 128 | 5.06E-04 |
| cg16891895 | <i>RGS16</i>     | -4.079 | 79  | 83  | 5.06E-04 |
| cg25713309 | <i>FLJ22709</i>  | -5.636 | 36  | 126 | 5.06E-04 |
| cg14204992 | <i>ZFAND3</i>    | -6.136 | 88  | 74  | 5.07E-04 |
| cg23568913 | <i>PES1</i>      | -5.946 | 44  | 118 | 5.07E-04 |
| cg06495924 | <i>CYC1</i>      | -4.284 | 108 | 54  | 5.07E-04 |
| cg26917625 | <i>XRN2</i>      | -5.223 | 30  | 132 | 5.07E-04 |
| cg07278207 | <i>DCDC1</i>     | -5.424 | 46  | 116 | 5.08E-04 |
| cg26289880 | <i>C21orf45</i>  | -4.417 | 84  | 78  | 5.08E-04 |
| cg15572787 | <i>RTDR1</i>     | -5.942 | 29  | 133 | 5.08E-04 |
| cg07494047 | <i>ZNF304</i>    | -5.645 | 42  | 120 | 5.08E-04 |
| cg03117949 | <i>USP16</i>     | -3.604 | 94  | 68  | 5.09E-04 |
| cg15798455 | <i>PROK2</i>     | -4.025 | 71  | 91  | 5.09E-04 |
| cg01714513 | <i>GOLGA8A</i>   | 3.069  | 57  | 105 | 5.09E-04 |
| cg10784785 | <i>SIAH1</i>     | -3.579 | 112 | 50  | 5.10E-04 |
| cg03099492 | <i>CYP26A1</i>   | -3.893 | 77  | 85  | 5.10E-04 |
| cg04466253 | <i>ACBD5</i>     | -6.292 | 93  | 69  | 5.10E-04 |
| cg19370515 | <i>RBBP9</i>     | -5.033 | 67  | 95  | 5.10E-04 |
| cg21935083 | <i>RAD50</i>     | -2.798 | 124 | 38  | 5.10E-04 |
| cg22827640 | <i>HPCAL4</i>    | -6.408 | 51  | 111 | 5.10E-04 |
| cg11857445 | <i>AATF</i>      | -3.922 | 100 | 62  | 5.10E-04 |
| cg13263483 | <i>GJB3</i>      | -4.053 | 88  | 74  | 5.10E-04 |
| cg12095167 | <i>RAB2</i>      | -2.417 | 48  | 113 | 5.11E-04 |
| cg15235832 | <i>ACTR2</i>     | -3.687 | 72  | 90  | 5.11E-04 |
| cg24283842 | <i>RPLP1</i>     | -5.402 | 85  | 77  | 5.11E-04 |
| cg24929737 | <i>EFNB2</i>     | -5.225 | 65  | 97  | 5.11E-04 |
| cg13346032 | <i>TBC1D22A</i>  | -4.365 | 58  | 104 | 5.12E-04 |
| cg25018329 | <i>E2F8</i>      | -5.377 | 128 | 34  | 5.13E-04 |
| cg25411534 | <i>C2orf15</i>   | -4.434 | 56  | 106 | 5.13E-04 |
| cg20092677 | <i>ABCF3</i>     | -5.568 | 90  | 72  | 5.13E-04 |
| cg00024396 | <i>ELOVL5</i>    | -4.908 | 76  | 86  | 5.14E-04 |
| cg09056317 | <i>POLR2I</i>    | -1.718 | 102 | 60  | 5.14E-04 |
| cg13828839 | <i>FXYP6</i>     | -5.150 | 91  | 71  | 5.15E-04 |
| cg10200408 | <i>ASB8</i>      | -5.411 | 54  | 108 | 5.16E-04 |
| cg03168296 | <i>NOXA1</i>     | -4.377 | 82  | 80  | 5.16E-04 |
| cg23751724 | <i>C20orf133</i> | -3.430 | 80  | 82  | 5.16E-04 |
| cg03851112 | <i>BBS1</i>      | -4.032 | 89  | 73  | 5.17E-04 |
| cg12292686 | <i>PAOX</i>      | -4.586 | 65  | 97  | 5.17E-04 |
| cg01739965 | <i>VPS54</i>     | -4.690 | 69  | 93  | 5.18E-04 |
| cg05023691 | <i>RGS13</i>     | 0.776  | 117 | 45  | 5.18E-04 |
| cg09272869 | <i>FEM1B</i>     | -4.792 | 68  | 94  | 5.19E-04 |
| cg04878842 | <i>ERCC2</i>     | -3.389 | 57  | 100 | 5.20E-04 |

|            |          |        |     |     |          |
|------------|----------|--------|-----|-----|----------|
| cg08596544 | SLC33A1  | -4.530 | 64  | 98  | 5.20E-04 |
| cg21972382 | RSNL2    | -3.582 | 81  | 81  | 5.21E-04 |
| cg13451483 | MGC39581 | -5.253 | 72  | 90  | 5.21E-04 |
| cg03713346 | CPNE2    | -5.631 | 73  | 89  | 5.21E-04 |
| cg15947959 | ERGIC1   | -3.463 | 93  | 69  | 5.21E-04 |
| cg05523047 | VLDLR    | -4.999 | 62  | 100 | 5.21E-04 |
| cg06090421 | PPM1D    | -4.271 | 54  | 108 | 5.21E-04 |
| cg02186298 | DPF2     | -2.872 | 81  | 81  | 5.21E-04 |
| cg09938768 | EPHB3    | -5.027 | 113 | 49  | 5.21E-04 |
| cg24334879 | NKTR     | -5.024 | 64  | 98  | 5.21E-04 |
| cg03035419 | RPS21    | -5.981 | 42  | 120 | 5.22E-04 |
| cg23704082 | TRIM59   | -4.951 | 34  | 128 | 5.22E-04 |
| cg00228799 | ENDOG    | -4.707 | 77  | 85  | 5.22E-04 |
| cg16381688 | THEM2    | 1.385  | 67  | 95  | 5.22E-04 |
| cg25885108 | TP73     | -5.068 | 123 | 39  | 5.22E-04 |
| cg06780358 | PTPRJ    | -4.891 | 75  | 87  | 5.22E-04 |
| cg18381880 | VDAC3    | -6.232 | 78  | 84  | 5.22E-04 |
| cg02300906 | FANCF    | -4.788 | 56  | 106 | 5.23E-04 |
| cg25349574 | CAMTA2   | -5.122 | 82  | 80  | 5.23E-04 |
| cg00948524 | RNF135   | -4.357 | 82  | 80  | 5.23E-04 |
| cg25095612 | NFKB2    | -4.482 | 57  | 105 | 5.23E-04 |
| cg03773789 | GLI4     | -3.260 | 54  | 108 | 5.24E-04 |
| cg11674404 | WDR17    | -4.011 | 61  | 101 | 5.24E-04 |
| cg01244871 | FAM82B   | -5.215 | 23  | 139 | 5.25E-04 |
| cg14243026 | HMP19    | -5.265 | 100 | 62  | 5.25E-04 |
| cg10749413 | ABCA7    | -4.636 | 35  | 127 | 5.25E-04 |
| cg01204271 | YBX2     | -4.291 | 124 | 38  | 5.26E-04 |
| cg09495351 | WIRE     | -3.510 | 115 | 47  | 5.26E-04 |
| cg11395975 | GBL      | -5.262 | 79  | 83  | 5.26E-04 |
| cg07050831 | HSPC268  | -3.421 | 92  | 70  | 5.26E-04 |
| cg13398993 | ARMC1    | -4.385 | 59  | 103 | 5.26E-04 |
| cg15368822 | TMEM63A  | -4.297 | 83  | 79  | 5.26E-04 |
| cg22521310 | SERTAD2  | -4.368 | 108 | 54  | 5.26E-04 |
| cg09076012 | NOV      | -3.122 | 41  | 121 | 5.26E-04 |
| cg14832358 | FLJ10379 | -4.553 | 36  | 126 | 5.26E-04 |
| cg19186356 | ALDH2    | -3.448 | 104 | 58  | 5.27E-04 |
| cg13155059 | CAPZA2   | -4.693 | 52  | 110 | 5.27E-04 |
| cg05577173 | PAPD4    | -4.072 | 67  | 95  | 5.27E-04 |
| cg17687962 | KLK3     | 0.610  | 66  | 96  | 5.27E-04 |
| cg20057066 | FLJ42957 | -4.128 | 38  | 124 | 5.27E-04 |
| cg23473849 | PPP2R5B  | -4.644 | 68  | 94  | 5.27E-04 |
| cg04947578 | C19orf10 | -4.372 | 42  | 120 | 5.27E-04 |
| cg21508214 | IFT80    | -6.109 | 61  | 101 | 5.28E-04 |
| cg04384398 | PMM1     | -3.060 | 101 | 61  | 5.29E-04 |
| cg12317676 | CARM1    | -4.861 | 49  | 113 | 5.29E-04 |
| cg02720618 | ESR1     | -4.557 | 127 | 35  | 5.30E-04 |
| cg02806093 | RAB2B    | -5.059 | 86  | 76  | 5.30E-04 |
| cg03205208 | KIN      | -3.616 | 69  | 93  | 5.30E-04 |
| cg17560720 | FBXO18   | -4.885 | 78  | 84  | 5.30E-04 |
| cg20163288 | GJA7     | -3.985 | 70  | 92  | 5.30E-04 |
| cg21606237 | STX17    | -4.471 | 97  | 65  | 5.30E-04 |
| cg22359217 | FBXO4    | -4.632 | 42  | 120 | 5.30E-04 |
| cg23906144 | OVCA2    | -5.522 | 73  | 89  | 5.30E-04 |
| cg26403198 | FBXL6    | -4.995 | 53  | 109 | 5.30E-04 |
| cg20361540 | VPS37B   | -4.666 | 58  | 104 | 5.30E-04 |

|            |          |        |     |     |          |
|------------|----------|--------|-----|-----|----------|
| cg13555543 | MAX      | -5.192 | 71  | 91  | 5.30E-04 |
| cg03664139 | ASCC3    | -5.805 | 65  | 97  | 5.30E-04 |
| cg08763433 | SMG5     | -6.096 | 30  | 132 | 5.31E-04 |
| cg19931106 | CCDC75   | -4.859 | 42  | 120 | 5.31E-04 |
| cg27649764 | CTDSPL2  | -5.223 | 40  | 122 | 5.33E-04 |
| cg24373308 | BAG2     | -5.022 | 46  | 116 | 5.33E-04 |
| cg24254120 | RFC3     | -4.192 | 27  | 135 | 5.33E-04 |
| cg03109066 | C4orf16  | -6.089 | 61  | 101 | 5.34E-04 |
| cg22009489 | MYEOV2   | -5.427 | 96  | 66  | 5.34E-04 |
| cg00917893 | PDHB     | -5.427 | 72  | 90  | 5.34E-04 |
| cg26212229 | SNRPD1   | 2.488  | 128 | 34  | 5.34E-04 |
| cg00770871 | TULP3    | -5.815 | 46  | 116 | 5.35E-04 |
| cg24355006 | CSNK1G2  | 3.261  | 65  | 97  | 5.35E-04 |
| cg18253802 | MYB      | -3.714 | 42  | 120 | 5.36E-04 |
| cg17771854 | IPO13    | -5.434 | 73  | 89  | 5.36E-04 |
| cg12204727 | COMMD4   | -3.701 | 18  | 144 | 5.36E-04 |
| cg02207610 | PPP1R12C | -4.061 | 97  | 65  | 5.36E-04 |
| cg23080667 | STK35    | -5.581 | 84  | 78  | 5.37E-04 |
| cg09809242 | MKI67IP  | -4.688 | 78  | 84  | 5.37E-04 |
| cg14530801 | STX18    | -4.970 | 44  | 118 | 5.37E-04 |
| cg07673945 | GART     | -5.060 | 62  | 100 | 5.38E-04 |
| cg08568987 | U2AF2    | -4.910 | 93  | 69  | 5.38E-04 |
| cg24334790 | ARL5     | -4.941 | 54  | 108 | 5.38E-04 |
| cg07981910 | DAB2IP   | -6.028 | 50  | 112 | 5.38E-04 |
| cg03361068 | TRIM9    | -4.755 | 73  | 89  | 5.39E-04 |
| cg07537523 | BCAT1    | -4.055 | 41  | 121 | 5.39E-04 |
| cg00730260 | FLJ32894 | 2.872  | 139 | 23  | 5.39E-04 |
| cg04718342 | CLPX     | -4.157 | 109 | 53  | 5.40E-04 |
| cg06417225 | PEBP1    | -3.707 | 79  | 83  | 5.41E-04 |
| cg10482750 | NRD1     | -5.612 | 49  | 113 | 5.41E-04 |
| cg06777274 | ME2      | -4.619 | 77  | 85  | 5.41E-04 |
| cg07755653 | STX11    | -5.730 | 66  | 96  | 5.42E-04 |
| cg26803566 | SGPP1    | -4.584 | 48  | 114 | 5.42E-04 |
| cg26885858 | NBPF3    | -4.717 | 100 | 62  | 5.42E-04 |
| cg26709950 | RRAD     | -2.856 | 20  | 142 | 5.42E-04 |
| cg12090242 | ATP6V1E1 | -3.149 | 121 | 41  | 5.42E-04 |
| cg26357241 | STXBP3   | -4.211 | 88  | 74  | 5.42E-04 |
| cg20736065 | MSI2     | -6.079 | 89  | 73  | 5.43E-04 |
| cg27005053 | CFDP1    | -5.214 | 24  | 138 | 5.43E-04 |
| cg23705973 | HIST1H1D | -4.199 | 86  | 76  | 5.44E-04 |
| cg00043080 | PLD3     | 2.514  | 71  | 91  | 5.44E-04 |
| cg15519208 | HIST1H1E | -3.626 | 125 | 37  | 5.44E-04 |
| cg26265187 | USP52    | 3.451  | 86  | 76  | 5.44E-04 |
| cg25556101 | RPS19BP1 | -5.203 | 76  | 86  | 5.44E-04 |
| cg13782957 | PSMA4    | -4.631 | 75  | 87  | 5.45E-04 |
| cg18501026 | DOCK3    | -2.883 | 65  | 97  | 5.45E-04 |
| cg21273125 | ABHD2    | -4.405 | 74  | 88  | 5.45E-04 |
| cg03409548 | MOBKL2C  | -3.601 | 49  | 113 | 5.45E-04 |
| cg12419067 | CRELD1   | -4.464 | 63  | 99  | 5.45E-04 |
| cg25829226 | PLEKHQ1  | -3.688 | 88  | 74  | 5.45E-04 |
| cg12833720 | BCL3     | -3.672 | 51  | 111 | 5.46E-04 |
| cg00180012 | LACE1    | -4.719 | 117 | 45  | 5.46E-04 |
| cg16796590 | MFSD2    | -4.309 | 103 | 59  | 5.47E-04 |
| cg03764352 | ETNK1    | -4.708 | 74  | 88  | 5.48E-04 |
| cg15831452 | PRPSAP2  | -5.845 | 76  | 86  | 5.48E-04 |

|            |                 |        |     |     |          |
|------------|-----------------|--------|-----|-----|----------|
| cg04582938 | <i>UAP1L1</i>   | -1.475 | 93  | 69  | 5.48E-04 |
| cg09297361 | <i>SNX22</i>    | -4.214 | 33  | 129 | 5.48E-04 |
| cg13590277 | <i>SYNPO</i>    | -1.496 | 85  | 77  | 5.48E-04 |
| cg22956315 | <i>TTC1</i>     | -5.169 | 75  | 87  | 5.48E-04 |
| cg00688421 | <i>RAP1GDS1</i> | -4.315 | 94  | 68  | 5.48E-04 |
| cg03000603 | <i>DHX34</i>    | -3.514 | 108 | 54  | 5.48E-04 |
| cg11394644 | <i>C17orf80</i> | -4.051 | 89  | 73  | 5.49E-04 |
| cg22407574 | <i>DONSON</i>   | -4.806 | 64  | 98  | 5.50E-04 |
| cg13351698 | <i>CBX3</i>     | -4.470 | 59  | 103 | 5.51E-04 |
| cg20530223 | <i>KLHL5</i>    | -4.552 | 58  | 104 | 5.51E-04 |
| cg22831263 | <i>KIAA1840</i> | -4.345 | 38  | 124 | 5.51E-04 |
| cg22114222 | <i>TIPARP</i>   | -6.871 | 94  | 68  | 5.51E-04 |
| cg24886748 | <i>SLC12A7</i>  | -5.339 | 65  | 97  | 5.51E-04 |
| cg25418831 | <i>VPS13A</i>   | -5.394 | 91  | 71  | 5.51E-04 |
| cg00954566 | <i>SCD</i>      | -5.286 | 42  | 120 | 5.51E-04 |
| cg00103783 | <i>MPDU1</i>    | -5.531 | 77  | 85  | 5.52E-04 |
| cg24286767 | <i>LOC51255</i> | -5.670 | 79  | 83  | 5.53E-04 |
| cg02744459 | <i>RECQL</i>    | -4.053 | 34  | 128 | 5.53E-04 |
| cg03029616 | <i>KRTAP6-1</i> | 2.380  | 56  | 106 | 5.54E-04 |
| cg11916186 | <i>THRAP3</i>   | -5.125 | 118 | 44  | 5.54E-04 |
| cg04467034 | <i>ANKRD10</i>  | -4.799 | 105 | 57  | 5.55E-04 |
| cg11160386 | <i>MDM1</i>     | -4.979 | 107 | 55  | 5.55E-04 |
| cg11336428 | <i>TEX2</i>     | -3.959 | 101 | 61  | 5.55E-04 |
| cg22424108 | <i>SLC44A3</i>  | -2.561 | 78  | 84  | 5.56E-04 |
| cg03427831 | <i>MTHFR</i>    | -1.461 | 58  | 104 | 5.57E-04 |
| cg06114765 | <i>USP25</i>    | -4.372 | 91  | 71  | 5.57E-04 |
| cg07413497 | <i>C6orf57</i>  | -3.947 | 18  | 144 | 5.57E-04 |
| cg15945602 | <i>VAT1</i>     | 1.738  | 46  | 116 | 5.57E-04 |
| cg22190705 | <i>DDEF2</i>    | -3.356 | 57  | 105 | 5.57E-04 |
| cg25250998 | <i>GSTO2</i>    | -4.115 | 78  | 84  | 5.57E-04 |
| cg06397510 | <i>PTP4A2</i>   | -4.773 | 83  | 79  | 5.57E-04 |
| cg19857537 | <i>RPUSD4</i>   | -4.283 | 76  | 86  | 5.57E-04 |
| cg22255355 | <i>HKR2</i>     | -5.865 | 82  | 80  | 5.57E-04 |
| cg27313662 | <i>PPA2</i>     | -5.501 | 108 | 54  | 5.57E-04 |
| cg03939485 | <i>RGL2</i>     | -3.591 | 48  | 114 | 5.57E-04 |
| cg15056247 | <i>TSPYL1</i>   | -5.489 | 91  | 71  | 5.57E-04 |
| cg06730468 | <i>FLJ10922</i> | -3.314 | 101 | 61  | 5.59E-04 |
| cg23257840 | <i>ZNF264</i>   | -5.633 | 69  | 93  | 5.59E-04 |
| cg07597871 | <i>RAP1A</i>    | -4.113 | 97  | 65  | 5.60E-04 |
| cg05073035 | <i>ZIC1</i>     | -1.954 | 65  | 97  | 5.60E-04 |
| cg07342545 | <i>FOSL2</i>    | -5.169 | 65  | 97  | 5.60E-04 |
| cg15260250 | <i>AP3S1</i>    | -6.092 | 71  | 91  | 5.60E-04 |
| cg15770654 | <i>IIP45</i>    | 3.202  | 126 | 36  | 5.61E-04 |
| cg04154812 | <i>CALCOCO2</i> | -2.499 | 61  | 101 | 5.61E-04 |
| cg06609475 | <i>NDUFS6</i>   | -4.981 | 67  | 95  | 5.61E-04 |
| cg25895922 | <i>MLPH</i>     | -3.806 | 94  | 68  | 5.61E-04 |
| cg13064571 | <i>C8orf44</i>  | -0.099 | 90  | 62  | 5.62E-04 |
| cg25140370 | <i>IRF4</i>     | -4.125 | 98  | 64  | 5.62E-04 |
| cg06307601 | <i>FAM49B</i>   | -4.633 | 69  | 93  | 5.62E-04 |
| cg17330200 | <i>ERMAP</i>    | -4.828 | 108 | 54  | 5.63E-04 |
| cg05090725 | <i>RAB39</i>    | -4.870 | 84  | 78  | 5.63E-04 |
| cg23957084 | <i>MRPL40</i>   | -5.717 | 104 | 58  | 5.63E-04 |
| cg02066887 | <i>POLD4</i>    | -5.026 | 57  | 105 | 5.63E-04 |
| cg20867633 | <i>GOLT1A</i>   | -2.680 | 53  | 109 | 5.63E-04 |
| cg22559669 | <i>TSPAN5</i>   | -5.989 | 64  | 98  | 5.63E-04 |

|            |                     |        |     |     |          |
|------------|---------------------|--------|-----|-----|----------|
| cg19112780 | <i>PTPRU</i>        | -5.477 | 106 | 56  | 5.63E-04 |
| cg12626085 | <i>UEV3</i>         | -5.250 | 87  | 75  | 5.63E-04 |
| cg15182360 | <i>PCDH20</i>       | -3.888 | 68  | 94  | 5.63E-04 |
| cg01107031 | <i>TGFB1</i>        | -4.366 | 61  | 101 | 5.64E-04 |
| cg06426831 | <i>SLC35A3</i>      | -3.714 | 88  | 74  | 5.64E-04 |
| cg14550570 | <i>LRRC47</i>       | -6.661 | 76  | 86  | 5.64E-04 |
| cg07181349 | <i>KIT</i>          | -5.293 | 76  | 86  | 5.64E-04 |
| cg00854995 | <i>SKP1A</i>        | -4.445 | 69  | 93  | 5.64E-04 |
| cg18204052 | <i>C12orf52</i>     | -6.057 | 122 | 40  | 5.64E-04 |
| cg02210123 | <i>RHOJ</i>         | -4.038 | 63  | 99  | 5.65E-04 |
| cg26916607 | <i>CETP</i>         | 1.663  | 115 | 47  | 5.65E-04 |
| cg02994216 | <i>RALB</i>         | -5.920 | 60  | 102 | 5.65E-04 |
| cg09060849 | <i>GGA2</i>         | -4.242 | 103 | 59  | 5.65E-04 |
| cg14784788 | <i>CDC25C</i>       | -5.291 | 105 | 57  | 5.65E-04 |
| cg09114799 | <i>RAPGEF3</i>      | -3.228 | 105 | 57  | 5.65E-04 |
| cg12846938 | <i>GPSN2</i>        | -3.202 | 76  | 86  | 5.66E-04 |
| cg11806389 | <i>ZNF446</i>       | -4.579 | 25  | 137 | 5.66E-04 |
| cg19367388 | <i>UBE2R2</i>       | -5.374 | 64  | 98  | 5.66E-04 |
| cg22397854 | <i>C1orf102</i>     | -4.612 | 55  | 107 | 5.66E-04 |
| cg12835684 | <i>MFSD5</i>        | -3.879 | 76  | 86  | 5.67E-04 |
| cg05890578 | <i>PRKCE</i>        | -4.887 | 66  | 96  | 5.67E-04 |
| cg20100381 | <i>APPBP1</i>       | -3.640 | 58  | 104 | 5.67E-04 |
| cg12000587 | <i>C17orf79</i>     | -2.348 | 99  | 63  | 5.68E-04 |
| cg06150803 | <i>TNFRSF19</i>     | -1.676 | 95  | 64  | 5.68E-04 |
| cg09146695 | <i>LEF1</i>         | -4.550 | 129 | 33  | 5.69E-04 |
| cg21784940 | <i>REPIN1</i>       | 0.278  | 67  | 95  | 5.69E-04 |
| cg22622686 | <i>DKFZp727G131</i> | -4.818 | 74  | 88  | 5.69E-04 |
| cg17237063 | <i>RBMS3</i>        | -4.328 | 35  | 127 | 5.70E-04 |
| cg12920798 | <i>MGC4093</i>      | -4.510 | 63  | 99  | 5.70E-04 |
| cg23525180 | <i>ID2</i>          | -4.833 | 103 | 59  | 5.70E-04 |
| cg03586879 | <i>A2BP1</i>        | -3.781 | 88  | 74  | 5.70E-04 |
| cg22258437 | <i>ID3</i>          | -6.121 | 86  | 76  | 5.70E-04 |
| cg11378484 | <i>NIF3L1BP1</i>    | -0.849 | 89  | 73  | 5.70E-04 |
| cg14872956 | <i>IKIP</i>         | -5.165 | 32  | 130 | 5.71E-04 |
| cg10218426 | <i>CKAP2</i>        | -5.458 | 79  | 83  | 5.71E-04 |
| cg02937060 | <i>ANP32E</i>       | -3.398 | 98  | 64  | 5.71E-04 |
| cg11628282 | <i>MFN1</i>         | -4.954 | 110 | 52  | 5.71E-04 |
| cg26855724 | <i>C1orf171</i>     | -5.488 | 100 | 62  | 5.71E-04 |
| cg07326074 | <i>FLJ13909</i>     | -5.257 | 54  | 108 | 5.72E-04 |
| cg15955341 | <i>GSTM4</i>        | -5.930 | 70  | 92  | 5.72E-04 |
| cg16338347 | <i>ALCAM</i>        | -4.226 | 67  | 95  | 5.72E-04 |
| cg05250673 | <i>IPMK</i>         | -5.795 | 84  | 78  | 5.73E-04 |
| cg07715201 | <i>GDNF</i>         | -3.468 | 73  | 89  | 5.73E-04 |
| cg07805833 | <i>POLR1C</i>       | 2.909  | 80  | 82  | 5.73E-04 |
| cg13701273 | <i>EPHA5</i>        | -3.391 | 77  | 85  | 5.73E-04 |
| cg03077836 | <i>DDEF2</i>        | -5.363 | 70  | 92  | 5.73E-04 |
| cg19391527 | <i>PNOC</i>         | 0.414  | 63  | 99  | 5.73E-04 |
| cg19447496 | <i>RB1</i>          | 3.398  | 65  | 97  | 5.73E-04 |
| cg22197033 | <i>CCDC42</i>       | -5.531 | 74  | 88  | 5.73E-04 |
| cg22734315 | <i>ASCIZ</i>        | -5.565 | 71  | 91  | 5.73E-04 |
| cg12991341 | <i>TMEM74</i>       | 3.199  | 65  | 97  | 5.73E-04 |
| cg12554819 | <i>REV1L</i>        | -5.451 | 63  | 99  | 5.74E-04 |
| cg23326785 | <i>TMEM25</i>       | -3.825 | 69  | 93  | 5.74E-04 |
| cg03833068 | <i>HIST1H2BN</i>    | -4.421 | 40  | 122 | 5.74E-04 |
| cg06378357 | <i>U1SNRNPBP</i>    | -4.143 | 91  | 71  | 5.74E-04 |

|            |                  |        |     |     |          |
|------------|------------------|--------|-----|-----|----------|
| cg15754109 | <i>COPS5</i>     | -5.011 | 101 | 61  | 5.74E-04 |
| cg02965078 | <i>GPR44</i>     | -2.267 | 72  | 90  | 5.75E-04 |
| cg15422147 | <i>SERPINB5</i>  | 2.065  | 56  | 106 | 5.75E-04 |
| cg02008544 | <i>TNFRSF10B</i> | -4.923 | 71  | 91  | 5.76E-04 |
| cg21484834 | <i>PTK6</i>      | 1.330  | 42  | 120 | 5.76E-04 |
| cg27263448 | <i>NAG8</i>      | 3.119  | 88  | 74  | 5.76E-04 |
| cg07454215 | <i>DCP1A</i>     | -5.456 | 73  | 89  | 5.77E-04 |
| cg21238818 | <i>GAL3ST3</i>   | -2.499 | 101 | 61  | 5.78E-04 |
| cg21368354 | <i>FLJ10769</i>  | -4.426 | 51  | 111 | 5.78E-04 |
| cg24035370 | <i>PRKCZ</i>     | -3.833 | 77  | 85  | 5.78E-04 |
| cg12781395 | <i>SNW1</i>      | -3.286 | 80  | 82  | 5.78E-04 |
| cg18335933 | <i>WRNIP1</i>    | -6.075 | 60  | 102 | 5.78E-04 |
| cg11450001 | <i>GABARAPL1</i> | -4.990 | 60  | 102 | 5.78E-04 |
| cg22498840 | <i>MCART1</i>    | -4.836 | 85  | 77  | 5.78E-04 |
| cg22775896 | <i>GM2A</i>      | -5.385 | 78  | 84  | 5.78E-04 |
| cg15035273 | <i>USP52</i>     | -4.757 | 120 | 42  | 5.78E-04 |
| cg18304195 | <i>KBTBD8</i>    | -3.230 | 51  | 111 | 5.78E-04 |
| cg18557145 | <i>CD72</i>      | 2.649  | 96  | 66  | 5.78E-04 |
| cg18602811 | <i>DYNC1LI1</i>  | -3.858 | 122 | 40  | 5.78E-04 |
| cg24247865 | <i>CHORDC1</i>   | -2.707 | 37  | 125 | 5.79E-04 |
| cg04215480 | <i>ZNF573</i>    | -4.615 | 79  | 83  | 5.79E-04 |
| cg10014293 | <i>MT1H</i>      | -3.209 | 85  | 77  | 5.79E-04 |
| cg23626798 | <i>L3MBTL</i>    | 0.720  | 64  | 98  | 5.79E-04 |
| cg05149586 | <i>SDSL</i>      | -2.230 | 96  | 66  | 5.79E-04 |
| cg22874960 | <i>LKAP</i>      | -4.518 | 98  | 64  | 5.79E-04 |
| cg14042128 | <i>CHMP2A</i>    | -3.850 | 57  | 105 | 5.79E-04 |
| cg11296937 | <i>HSPC152</i>   | -1.877 | 92  | 70  | 5.81E-04 |
| cg05624932 | <i>CRISPLD1</i>  | -3.647 | 97  | 65  | 5.81E-04 |
| cg06296021 | <i>CDKL3</i>     | -4.618 | 51  | 111 | 5.82E-04 |
| cg11861730 | <i>ETS1</i>      | -4.406 | 89  | 73  | 5.82E-04 |
| cg27427207 | <i>ATP8A1</i>    | -5.076 | 74  | 88  | 5.82E-04 |
| cg20991801 | <i>CDC2L5</i>    | -4.523 | 72  | 90  | 5.82E-04 |
| cg26757053 | <i>LYPLAL1</i>   | -3.700 | 115 | 47  | 5.82E-04 |
| cg02626977 | <i>CDKN3</i>     | -5.529 | 53  | 109 | 5.82E-04 |
| cg06211616 | <i>SLC22A18</i>  | -4.052 | 93  | 69  | 5.82E-04 |
| cg22751696 | <i>C3orf14</i>   | -4.097 | 54  | 108 | 5.82E-04 |
| cg15278948 | <i>ZFAND2B</i>   | -4.533 | 43  | 119 | 5.83E-04 |
| cg17797182 | <i>SNRPD1</i>    | -5.200 | 53  | 109 | 5.83E-04 |
| cg04946916 | <i>HUS1B</i>     | 4.512  | 65  | 97  | 5.83E-04 |
| cg22138278 | <i>MAF1</i>      | -4.807 | 64  | 98  | 5.84E-04 |
| cg13592003 | <i>ZNF250</i>    | -5.816 | 83  | 79  | 5.84E-04 |
| cg09451092 | <i>CCDC19</i>    | 2.518  | 57  | 105 | 5.85E-04 |
| cg20815063 | <i>MRE11A</i>    | -5.506 | 97  | 65  | 5.85E-04 |
| cg23088430 | <i>EEF1D</i>     | -4.804 | 113 | 49  | 5.85E-04 |
| cg25420398 | <i>RYK</i>       | -3.792 | 94  | 68  | 5.85E-04 |
| cg14736210 | <i>KCNB1</i>     | 3.247  | 52  | 110 | 5.85E-04 |
| cg17946995 | <i>LOC196463</i> | -1.773 | 111 | 51  | 5.85E-04 |
| cg25327013 | <i>RNASE4</i>    | -4.038 | 62  | 100 | 5.85E-04 |
| cg26265060 | <i>SON</i>       | -3.593 | 38  | 124 | 5.85E-04 |
| cg18700967 | <i>SSH2</i>      | -5.132 | 70  | 92  | 5.85E-04 |
| cg13181284 | <i>KRT6B</i>     | 2.957  | 79  | 83  | 5.85E-04 |
| cg04311964 | <i>LYPD2</i>     | 1.678  | 72  | 90  | 5.85E-04 |
| cg22461835 | <i>ADRA1A</i>    | -2.832 | 28  | 134 | 5.85E-04 |
| cg23613177 | <i>C10orf89</i>  | -5.055 | 53  | 109 | 5.86E-04 |
| cg07774222 | <i>MED6</i>      | -5.629 | 93  | 69  | 5.86E-04 |

|            |                 |        |     |     |          |
|------------|-----------------|--------|-----|-----|----------|
| cg12724357 | <i>SYT12</i>    | -3.124 | 91  | 71  | 5.87E-04 |
| cg18870712 | <i>ZNF551</i>   | -5.358 | 43  | 119 | 5.87E-04 |
| cg09650985 | <i>SHKBP1</i>   | -5.629 | 77  | 85  | 5.87E-04 |
| cg18202456 | <i>KLF17</i>    | 5.242  | 84  | 78  | 5.88E-04 |
| cg21667836 | <i>PRMT8</i>    | -2.144 | 70  | 92  | 5.88E-04 |
| cg02603366 | <i>RPS21</i>    | -5.408 | 103 | 59  | 5.88E-04 |
| cg17569486 | <i>AP1S3</i>    | -4.385 | 50  | 112 | 5.88E-04 |
| cg18952647 | <i>BNC1</i>     | -3.946 | 77  | 85  | 5.88E-04 |
| cg05111829 | <i>SUPV3L1</i>  | -5.326 | 82  | 80  | 5.89E-04 |
| cg07719737 | <i>MANBAL</i>   | -4.694 | 110 | 52  | 5.89E-04 |
| cg14640682 | <i>GYS1</i>     | -5.707 | 94  | 68  | 5.89E-04 |
| cg25017837 | <i>WARS</i>     | -5.212 | 68  | 94  | 5.89E-04 |
| cg18247054 | <i>RNASET2</i>  | -5.289 | 32  | 130 | 5.89E-04 |
| cg26377677 | <i>FURIN</i>    | 1.834  | 70  | 92  | 5.89E-04 |
| cg05010058 | <i>CEP68</i>    | -4.207 | 91  | 71  | 5.90E-04 |
| cg18443378 | <i>WDR17</i>    | -4.588 | 48  | 114 | 5.92E-04 |
| cg08103676 | <i>43896</i>    | -4.184 | 26  | 136 | 5.92E-04 |
| cg09655559 | <i>TPD52L2</i>  | -4.966 | 54  | 108 | 5.93E-04 |
| cg22518733 | <i>CCL3</i>     | -0.862 | 111 | 51  | 5.93E-04 |
| cg22195268 | <i>FAM104A</i>  | -3.724 | 70  | 92  | 5.94E-04 |
| cg05399553 | <i>SNRPB</i>    | -4.810 | 65  | 97  | 5.94E-04 |
| cg08995424 | <i>ATP5G2</i>   | -4.434 | 88  | 74  | 5.94E-04 |
| cg22152667 | <i>OCM</i>      | 3.250  | 112 | 50  | 5.94E-04 |
| cg17582250 | <i>RCD-8</i>    | -4.858 | 70  | 92  | 5.95E-04 |
| cg14323109 | <i>KDR</i>      | -3.299 | 15  | 147 | 5.96E-04 |
| cg03809891 | <i>ZNF442</i>   | -5.730 | 73  | 89  | 5.97E-04 |
| cg14212314 | <i>HSPD1</i>    | -4.699 | 69  | 93  | 5.97E-04 |
| cg05744229 | <i>MYH7</i>     | 1.095  | 70  | 91  | 5.97E-04 |
| cg00848394 | <i>WDR51A</i>   | -4.733 | 97  | 65  | 5.97E-04 |
| cg26794638 | <i>KIAA0999</i> | -4.677 | 47  | 115 | 5.97E-04 |
| cg24493940 | <i>MMP17</i>    | -3.157 | 99  | 63  | 5.97E-04 |
| cg14502651 | <i>PRH2</i>     | 2.744  | 95  | 67  | 5.98E-04 |
| cg01780107 | <i>DCC1</i>     | -4.691 | 61  | 101 | 5.99E-04 |
| cg14915165 | <i>WDR3</i>     | -4.861 | 73  | 89  | 5.99E-04 |
| cg10541994 | <i>TMEM30A</i>  | -5.877 | 102 | 60  | 5.99E-04 |
| cg18015044 | <i>ABCF1</i>    | -4.102 | 66  | 96  | 5.99E-04 |
| cg07689821 | <i>DAXX</i>     | -4.257 | 89  | 73  | 6.00E-04 |
| cg21972430 | <i>TPD52L1</i>  | -5.141 | 52  | 110 | 6.00E-04 |
| cg13576739 | <i>PFDN6</i>    | -4.304 | 22  | 140 | 6.00E-04 |
| cg01078276 | <i>PLAU</i>     | -4.451 | 95  | 67  | 6.00E-04 |
| cg02101486 | <i>DLX5</i>     | -2.467 | 70  | 91  | 6.00E-04 |
| cg08313788 | <i>ROD1</i>     | -5.433 | 82  | 80  | 6.00E-04 |
| cg12405833 | <i>RUNDC2A</i>  | -3.995 | 125 | 37  | 6.00E-04 |
| cg24443885 | <i>ZNF227</i>   | -5.319 | 60  | 102 | 6.00E-04 |
| cg27015931 | <i>MGC50721</i> | -3.091 | 79  | 83  | 6.00E-04 |
| cg26083396 | <i>IMPDH1</i>   | -5.744 | 88  | 74  | 6.01E-04 |
| cg15085805 | <i>LSM4</i>     | -4.502 | 62  | 100 | 6.02E-04 |
| cg24653967 | <i>PRH1</i>     | 3.243  | 91  | 71  | 6.02E-04 |
| cg24745738 | <i>EDNRB</i>    | -2.482 | 72  | 90  | 6.02E-04 |
| cg05957518 | <i>PSMA3</i>    | -5.291 | 54  | 108 | 6.03E-04 |
| cg13144004 | <i>UMPS</i>     | -6.271 | 89  | 73  | 6.03E-04 |
| cg14796007 | <i>AP4M1</i>    | -4.722 | 45  | 117 | 6.03E-04 |
| cg20770311 | <i>SMPD1</i>    | -5.948 | 59  | 103 | 6.03E-04 |
| cg24642820 | <i>NUP210</i>   | 0.373  | 104 | 58  | 6.03E-04 |
| cg19632026 | <i>CHCHD3</i>   | -5.514 | 62  | 100 | 6.04E-04 |

|            |           |        |     |     |          |
|------------|-----------|--------|-----|-----|----------|
| cg25034557 | PACS1     | -4.248 | 41  | 121 | 6.04E-04 |
| cg23491309 | UBE2L6    | -5.421 | 56  | 106 | 6.05E-04 |
| cg26870337 | ZBTB40    | 3.058  | 53  | 109 | 6.05E-04 |
| cg25361106 | TLX2      | -3.255 | 101 | 61  | 6.06E-04 |
| cg10334928 | STON2     | 2.267  | 112 | 50  | 6.06E-04 |
| cg20451369 | C10orf57  | -5.130 | 67  | 95  | 6.06E-04 |
| cg14976276 | NEU1      | -5.352 | 38  | 124 | 6.07E-04 |
| cg06598631 | ORC3L     | -4.720 | 49  | 113 | 6.07E-04 |
| cg15703512 | MGC50721  | -4.215 | 71  | 91  | 6.08E-04 |
| cg15495837 | TRIM43    | 2.522  | 67  | 95  | 6.08E-04 |
| cg24896109 | CYP51A1   | -5.960 | 84  | 78  | 6.08E-04 |
| cg26288160 | C1orf56   | -4.824 | 90  | 72  | 6.09E-04 |
| cg17043366 | ZNF414    | -5.687 | 69  | 93  | 6.09E-04 |
| cg04936930 | PTS       | -4.879 | 40  | 122 | 6.09E-04 |
| cg10541755 | EIF5A2    | -4.305 | 51  | 111 | 6.09E-04 |
| cg01278696 | SMARCA5   | -4.458 | 29  | 133 | 6.09E-04 |
| cg18587973 | CDADC1    | -4.023 | 57  | 105 | 6.09E-04 |
| cg11762629 | CTDSP2    | -4.142 | 54  | 108 | 6.09E-04 |
| cg19418958 | TEX15     | -0.322 | 70  | 91  | 6.10E-04 |
| cg17225169 | PJA2      | 2.959  | 81  | 81  | 6.10E-04 |
| cg12099357 | FAM76A    | -4.799 | 69  | 93  | 6.10E-04 |
| cg21484964 | C15orf24  | 2.435  | 99  | 63  | 6.10E-04 |
| cg02126753 | AEBP1     | -3.708 | 52  | 110 | 6.11E-04 |
| cg10409799 | ADAR      | -4.309 | 98  | 64  | 6.11E-04 |
| cg19815139 | C14orf133 | -5.033 | 84  | 78  | 6.11E-04 |
| cg01626227 | TRIM4     | -4.596 | 128 | 34  | 6.12E-04 |
| cg07985359 | EVI5L     | -3.428 | 69  | 93  | 6.13E-04 |
| cg24592207 | TOMM40L   | -4.648 | 72  | 90  | 6.13E-04 |
| cg07690018 | CPNE7     | -4.140 | 95  | 67  | 6.13E-04 |
| cg13728650 | GPR175    | 3.286  | 23  | 139 | 6.13E-04 |
| cg01200177 | POLR2D    | -0.867 | 81  | 81  | 6.13E-04 |
| cg18222235 | FBXW8     | -3.974 | 37  | 125 | 6.13E-04 |
| cg14696348 | MC1R      | -4.980 | 58  | 104 | 6.14E-04 |
| cg03879294 | SFRS9     | -3.879 | 43  | 119 | 6.14E-04 |
| cg20571908 | MPHOSPH1  | -3.481 | 39  | 123 | 6.15E-04 |
| cg25229015 | WDR61     | -5.267 | 86  | 76  | 6.15E-04 |
| cg22425806 | TGFA      | -3.578 | 62  | 100 | 6.15E-04 |
| cg07663789 | NPR3      | -4.833 | 61  | 101 | 6.16E-04 |
| cg04910299 | MLL       | -4.385 | 93  | 69  | 6.16E-04 |
| cg02168291 | CDH13     | 1.948  | 80  | 82  | 6.16E-04 |
| cg02827328 | TRIM14    | -6.394 | 106 | 56  | 6.17E-04 |
| cg08747377 | CDH13     | -4.143 | 71  | 91  | 6.17E-04 |
| cg09076584 | FLJ25006  | 1.907  | 67  | 95  | 6.17E-04 |
| cg11234457 | FTMT      | 4.320  | 51  | 111 | 6.17E-04 |
| cg11385473 | IMMP1L    | -3.746 | 49  | 113 | 6.17E-04 |
| cg11750183 | C9orf40   | -4.436 | 93  | 69  | 6.17E-04 |
| cg14414534 | TMOD1     | 4.144  | 40  | 122 | 6.17E-04 |
| cg18104321 | MYST2     | -5.349 | 38  | 124 | 6.17E-04 |
| cg24243265 | MLZE      | 1.549  | 113 | 49  | 6.17E-04 |
| cg14623313 | APPBP2    | -3.044 | 63  | 99  | 6.18E-04 |
| cg15373285 | MEG3      | 0.452  | 139 | 23  | 6.18E-04 |
| cg17191178 | SHOX2     | -3.165 | 56  | 106 | 6.19E-04 |
| cg10074949 | MAPK6     | -5.039 | 107 | 55  | 6.19E-04 |
| cg06005644 | UBE2D2    | -5.512 | 52  | 110 | 6.19E-04 |
| cg24099544 | MADD      | -6.554 | 75  | 87  | 6.19E-04 |

|            |                 |        |     |     |          |
|------------|-----------------|--------|-----|-----|----------|
| cg13603099 | <i>RASSF4</i>   | -5.310 | 106 | 56  | 6.20E-04 |
| cg11466485 | <i>SARDH</i>    | 2.910  | 117 | 45  | 6.21E-04 |
| cg15144793 | <i>SH3BP4</i>   | -5.520 | 105 | 57  | 6.21E-04 |
| cg16666160 | <i>NR5A1</i>    | 5.607  | 83  | 79  | 6.21E-04 |
| cg06378976 | <i>TFEB</i>     | -2.103 | 108 | 54  | 6.21E-04 |
| cg13425637 | <i>PRKCH</i>    | -5.398 | 65  | 97  | 6.22E-04 |
| cg26136776 | <i>KLF1</i>     | 1.826  | 93  | 69  | 6.22E-04 |
| cg03366896 | <i>ECHS1</i>    | -5.746 | 57  | 105 | 6.22E-04 |
| cg05045383 | <i>RAE1</i>     | -5.486 | 74  | 88  | 6.23E-04 |
| cg07398350 | <i>C16orf57</i> | -4.118 | 41  | 121 | 6.23E-04 |
| cg05417615 | <i>C4orf13</i>  | -5.273 | 81  | 81  | 6.23E-04 |
| cg01306510 | <i>CDKN1A</i>   | -5.605 | 54  | 108 | 6.24E-04 |
| cg02237186 | <i>RRM2</i>     | -4.409 | 55  | 107 | 6.24E-04 |
| cg13135180 | <i>RPP21</i>    | -4.926 | 82  | 80  | 6.24E-04 |
| cg20286074 | <i>43923</i>    | -0.472 | 74  | 88  | 6.24E-04 |
| cg00521434 | <i>GPR61</i>    | 2.699  | 71  | 91  | 6.25E-04 |
| cg13964084 | <i>C6orf134</i> | -5.236 | 91  | 71  | 6.25E-04 |
| cg13612524 | <i>SPFH2</i>    | -2.890 | 41  | 121 | 6.25E-04 |
| cg22584335 | <i>ZNF512</i>   | -4.368 | 80  | 76  | 6.25E-04 |
| cg00695416 | <i>CBR1</i>     | -4.294 | 85  | 77  | 6.26E-04 |
| cg17177336 | <i>HSPC268</i>  | -3.693 | 86  | 76  | 6.26E-04 |
| cg17357984 | <i>CDC34</i>    | -5.009 | 41  | 121 | 6.26E-04 |
| cg15641675 | <i>DDX17</i>    | -5.358 | 55  | 107 | 6.26E-04 |
| cg10985987 | <i>CDIPT</i>    | -4.961 | 43  | 119 | 6.26E-04 |
| cg18556540 | <i>TRIM26</i>   | -5.666 | 63  | 99  | 6.27E-04 |
| cg16691888 | <i>LRP2</i>     | -3.194 | 63  | 99  | 6.27E-04 |
| cg00231644 | <i>TUBB2A</i>   | -1.016 | 61  | 101 | 6.27E-04 |
| cg01274660 | <i>TRIP6</i>    | -1.060 | 69  | 93  | 6.28E-04 |
| cg10315128 | <i>SMAD4</i>    | -4.786 | 61  | 101 | 6.28E-04 |
| cg11313997 | <i>B4GALT7</i>  | -5.291 | 68  | 94  | 6.28E-04 |
| cg21421701 | <i>SNFT</i>     | -5.045 | 86  | 76  | 6.28E-04 |
| cg26918645 | <i>ZNF285</i>   | -3.934 | 75  | 87  | 6.28E-04 |
| cg01958916 | <i>SEMA6C</i>   | -5.134 | 68  | 94  | 6.28E-04 |
| cg14105047 | <i>PDLIM5</i>   | -4.212 | 48  | 114 | 6.28E-04 |
| cg11628034 | <i>RPS16</i>    | -4.451 | 77  | 85  | 6.28E-04 |
| cg03712239 | <i>ZNF25</i>    | -4.660 | 127 | 35  | 6.30E-04 |
| cg11041966 | <i>RBM28</i>    | -5.374 | 104 | 58  | 6.30E-04 |
| cg10526232 | <i>ZNF688</i>   | -3.135 | 94  | 68  | 6.30E-04 |
| cg04765422 | <i>RAD18</i>    | -3.733 | 82  | 80  | 6.31E-04 |
| cg13240332 | <i>ARPC2</i>    | -4.943 | 63  | 99  | 6.31E-04 |
| cg00436282 | <i>STATH</i>    | 2.269  | 98  | 64  | 6.31E-04 |
| cg07950803 | <i>CD1A</i>     | 1.827  | 9   | 153 | 6.32E-04 |
| cg17904739 | <i>MGC4266</i>  | -2.005 | 74  | 88  | 6.32E-04 |
| cg00627286 | <i>UGDH</i>     | -3.624 | 127 | 35  | 6.32E-04 |
| cg18088775 | <i>RKHD2</i>    | -4.522 | 61  | 101 | 6.32E-04 |
| cg07080007 | <i>RPL27</i>    | -4.629 | 92  | 70  | 6.32E-04 |
| cg16511708 | <i>SS18</i>     | -5.163 | 74  | 88  | 6.33E-04 |
| cg12648583 | <i>FBXO8</i>    | -4.665 | 67  | 95  | 6.33E-04 |
| cg08179530 | <i>CDKN1A</i>   | -5.111 | 27  | 135 | 6.34E-04 |
| cg09538287 | <i>CTNNA3</i>   | -1.619 | 59  | 103 | 6.34E-04 |
| cg19282714 | <i>PADI2</i>    | -5.307 | 89  | 73  | 6.34E-04 |
| cg01726775 | <i>C1RL</i>     | -4.892 | 69  | 93  | 6.34E-04 |
| cg14059475 | <i>C2orf34</i>  | -6.045 | 100 | 62  | 6.35E-04 |
| cg07684150 | <i>IQWD1</i>    | -5.914 | 69  | 93  | 6.35E-04 |
| cg10583632 | <i>ZNF624</i>   | -5.750 | 62  | 100 | 6.35E-04 |

|            |                 |        |     |     |          |
|------------|-----------------|--------|-----|-----|----------|
| cg22593486 | <i>OR10H1</i>   | 5.735  | 63  | 99  | 6.35E-04 |
| cg03717979 | <i>MSX1</i>     | -4.819 | 95  | 67  | 6.35E-04 |
| cg05028467 | <i>SNCB</i>     | -2.763 | 62  | 100 | 6.35E-04 |
| cg21212956 | <i>ZDHHC4</i>   | -4.407 | 105 | 57  | 6.35E-04 |
| cg01747665 | <i>IGFALS</i>   | 1.307  | 88  | 74  | 6.35E-04 |
| cg05861661 | <i>FAM98B</i>   | -4.039 | 25  | 137 | 6.35E-04 |
| cg24524435 | <i>UCKL1</i>    | -3.928 | 70  | 92  | 6.35E-04 |
| cg24823993 | <i>NHP2L1</i>   | -4.473 | 74  | 88  | 6.35E-04 |
| cg25175370 | <i>C7orf27</i>  | -6.132 | 83  | 79  | 6.35E-04 |
| cg24447890 | <i>LMAN1L</i>   | 0.899  | 110 | 52  | 6.36E-04 |
| cg26091510 | <i>LRIG2</i>    | -4.034 | 92  | 70  | 6.37E-04 |
| cg09787394 | <i>LIPT1</i>    | -4.175 | 46  | 116 | 6.37E-04 |
| cg15576233 | <i>HEY1</i>     | -6.074 | 53  | 109 | 6.37E-04 |
| cg14046757 | <i>FLJ11806</i> | -4.959 | 39  | 123 | 6.37E-04 |
| cg00097536 | <i>ZFP36L2</i>  | -5.266 | 89  | 73  | 6.38E-04 |
| cg18034329 | <i>RABEP1</i>   | -4.006 | 54  | 108 | 6.38E-04 |
| cg03370542 | <i>ATG4C</i>    | -3.444 | 78  | 84  | 6.39E-04 |
| cg06821274 | <i>SSR2</i>     | -4.846 | 96  | 66  | 6.39E-04 |
| cg07128330 | <i>MDS028</i>   | -5.106 | 45  | 117 | 6.39E-04 |
| cg12180123 | <i>PAPOLG</i>   | -5.315 | 38  | 124 | 6.39E-04 |
| cg15435730 | <i>TFAP2D</i>   | -4.166 | 119 | 43  | 6.39E-04 |
| cg27190239 | <i>CLEC2A</i>   | -0.421 | 86  | 76  | 6.39E-04 |
| cg27270218 | <i>ITGB4BP</i>  | -3.883 | 97  | 65  | 6.39E-04 |
| cg01137737 | <i>MIR16</i>    | -4.206 | 66  | 96  | 6.39E-04 |
| cg22867063 | <i>ZNF214</i>   | -4.062 | 94  | 68  | 6.39E-04 |
| cg24651706 | <i>CHCHD5</i>   | -4.744 | 91  | 71  | 6.41E-04 |
| cg06948937 | <i>PCTK3</i>    | 1.773  | 42  | 120 | 6.41E-04 |
| cg09416501 | <i>TOB2</i>     | -4.227 | 63  | 99  | 6.41E-04 |
| cg25682559 | <i>FHOD3</i>    | -4.957 | 37  | 125 | 6.42E-04 |
| cg08173535 | <i>NR6A1</i>    | -3.801 | 80  | 82  | 6.42E-04 |
| cg04960652 | <i>BNIP1</i>    | -5.199 | 55  | 107 | 6.43E-04 |
| cg12433691 | <i>GCC2</i>     | -4.480 | 125 | 37  | 6.43E-04 |
| cg15248979 | <i>USP37</i>    | -5.464 | 64  | 98  | 6.43E-04 |
| cg04628008 | <i>ZBTB16</i>   | -5.059 | 43  | 119 | 6.43E-04 |
| cg15591837 | <i>PPIL1</i>    | -5.333 | 72  | 90  | 6.43E-04 |
| cg14439353 | <i>EEF1E1</i>   | -5.063 | 41  | 121 | 6.43E-04 |
| cg04871004 | <i>ZNF337</i>   | -6.278 | 60  | 102 | 6.43E-04 |
| cg25124433 | <i>KRT20</i>    | 2.896  | 45  | 117 | 6.44E-04 |
| cg01646665 | <i>TMEM79</i>   | -1.894 | 65  | 97  | 6.44E-04 |
| cg22362636 | <i>TNIP2</i>    | -3.463 | 90  | 72  | 6.44E-04 |
| cg19536127 | <i>CALM2</i>    | -4.917 | 55  | 107 | 6.46E-04 |
| cg15963417 | <i>PAH</i>      | -4.793 | 76  | 86  | 6.47E-04 |
| cg14325649 | <i>RBMS1</i>    | -4.382 | 118 | 44  | 6.47E-04 |
| cg22610305 | <i>CHAC1</i>    | -4.877 | 76  | 86  | 6.47E-04 |
| cg24471867 | <i>MLL4</i>     | -4.504 | 41  | 121 | 6.47E-04 |
| cg08452348 | <i>CATSPER3</i> | 3.400  | 117 | 45  | 6.48E-04 |
| cg17425616 | <i>SNX2</i>     | -2.461 | 84  | 78  | 6.48E-04 |
| cg21196187 | <i>PSKH1</i>    | -4.694 | 35  | 127 | 6.48E-04 |
| cg03866607 | <i>TBX4</i>     | -1.057 | 124 | 38  | 6.48E-04 |
| cg04255048 | <i>KIF9</i>     | -4.903 | 42  | 120 | 6.48E-04 |
| cg06452064 | <i>TRA2A</i>    | -4.910 | 77  | 85  | 6.48E-04 |
| cg16605590 | <i>MKI67IP</i>  | -4.828 | 67  | 95  | 6.48E-04 |
| cg13802364 | <i>RCOR2</i>    | -5.321 | 55  | 107 | 6.49E-04 |
| cg26331192 | <i>GMNN</i>     | -5.293 | 41  | 121 | 6.49E-04 |
| cg19796273 | <i>MYO10</i>    | -4.130 | 89  | 73  | 6.49E-04 |

|            |          |        |     |     |          |
|------------|----------|--------|-----|-----|----------|
| cg23857226 | ZNF671   | -4.073 | 85  | 77  | 6.50E-04 |
| cg01708236 | NFKBIE   | -3.654 | 59  | 103 | 6.51E-04 |
| cg00542846 | APP      | -4.135 | 63  | 99  | 6.51E-04 |
| cg10459515 | BCLAF1   | -5.749 | 72  | 90  | 6.51E-04 |
| cg16998213 | METRNL   | -6.000 | 72  | 90  | 6.52E-04 |
| cg22334000 | MGC35043 | -2.992 | 68  | 94  | 6.52E-04 |
| cg21890738 | CYB561   | -4.627 | 68  | 94  | 6.52E-04 |
| cg01190915 | MT2A     | -4.305 | 53  | 109 | 6.54E-04 |
| cg09916572 | ZP3      | -4.762 | 102 | 60  | 6.54E-04 |
| cg03808835 | PCDH15   | -3.968 | 110 | 52  | 6.54E-04 |
| cg21486659 | TMEM14B  | -4.319 | 105 | 57  | 6.54E-04 |
| cg24697682 | SLC25A4  | -5.738 | 92  | 70  | 6.54E-04 |
| cg26408937 | DDB2     | -4.904 | 65  | 97  | 6.55E-04 |
| cg25921910 | CDC73    | -2.312 | 68  | 94  | 6.56E-04 |
| cg24329794 | GRSF1    | -5.173 | 114 | 48  | 6.57E-04 |
| cg21746887 | FZD1     | -4.484 | 57  | 105 | 6.58E-04 |
| cg11792483 | ASPHD2   | -5.645 | 70  | 92  | 6.58E-04 |
| cg15900980 | GPX1     | -3.902 | 87  | 75  | 6.58E-04 |
| cg19394196 | RPS19    | -4.755 | 86  | 76  | 6.58E-04 |
| cg27005181 | HSMPP8   | -5.154 | 41  | 121 | 6.58E-04 |
| cg05059825 | TTC9C    | -4.896 | 102 | 60  | 6.59E-04 |
| cg09891106 | TP53INP2 | -5.285 | 66  | 96  | 6.59E-04 |
| cg22748850 | CDC25C   | -4.426 | 37  | 125 | 6.60E-04 |
| cg09429153 | PBX3     | -4.837 | 99  | 63  | 6.60E-04 |
| cg07061913 | DNAJC9   | -4.507 | 33  | 129 | 6.60E-04 |
| cg19523029 | TLE4     | -4.034 | 91  | 71  | 6.60E-04 |
| cg26393983 | KNTC2    | -4.530 | 44  | 118 | 6.61E-04 |
| cg09215553 | SHMT2    | -4.683 | 104 | 58  | 6.61E-04 |
| cg00405568 | NMT1     | -4.269 | 50  | 112 | 6.62E-04 |
| cg03383661 | TBCC     | -4.534 | 71  | 91  | 6.62E-04 |
| cg01505590 | PHLDA2   | -4.314 | 31  | 131 | 6.63E-04 |
| cg13216303 | ILF2     | -5.185 | 35  | 127 | 6.63E-04 |
| cg05221264 | ELA2A    | 2.904  | 141 | 21  | 6.63E-04 |
| cg09801842 | SFXN1    | -5.563 | 54  | 108 | 6.64E-04 |
| cg17096191 | NOS1AP   | -4.004 | 79  | 83  | 6.64E-04 |
| cg09475324 | HYPE     | -5.934 | 101 | 61  | 6.64E-04 |
| cg10401088 | LUM      | -1.887 | 117 | 45  | 6.64E-04 |
| cg27383956 | FLJ13265 | 1.114  | 63  | 99  | 6.65E-04 |
| cg03096975 | EML2     | -5.543 | 61  | 101 | 6.65E-04 |
| cg20030671 | FBXO28   | -4.823 | 48  | 114 | 6.65E-04 |
| cg19376794 | USP39    | -4.911 | 99  | 63  | 6.66E-04 |
| cg03402876 | KCNF1    | -5.829 | 68  | 94  | 6.66E-04 |
| cg07478100 | DERL2    | -5.047 | 80  | 82  | 6.68E-04 |
| cg20972416 | XLF      | -5.789 | 66  | 96  | 6.68E-04 |
| cg21750602 | PPP2R2D  | 1.273  | 78  | 84  | 6.68E-04 |
| cg23517548 | NFATC2IP | -5.182 | 84  | 78  | 6.68E-04 |
| cg21633208 | LNK      | -4.882 | 38  | 124 | 6.68E-04 |
| cg04429140 | AARSD1   | -5.156 | 60  | 102 | 6.68E-04 |
| cg26856388 | VKORC1L1 | -2.980 | 61  | 101 | 6.69E-04 |
| cg17918089 | SETDB1   | -4.937 | 94  | 68  | 6.70E-04 |
| cg12542281 | PFAAP5   | -3.491 | 113 | 49  | 6.71E-04 |
| cg19691267 | ACYPI    | -4.022 | 82  | 80  | 6.72E-04 |
| cg04691961 | C3orf57  | 1.901  | 120 | 42  | 6.72E-04 |
| cg26424013 | DCUN1D3  | -6.374 | 55  | 107 | 6.72E-04 |
| cg27352136 | SLC12A9  | -5.652 | 68  | 94  | 6.72E-04 |

|            |                 |        |     |     |          |
|------------|-----------------|--------|-----|-----|----------|
| cg05655556 | <i>PSMD2</i>    | -4.837 | 75  | 87  | 6.72E-04 |
| cg22909962 | <i>RPL7L1</i>   | -5.110 | 88  | 74  | 6.72E-04 |
| cg16581199 | <i>TSSK1</i>    | 2.017  | 104 | 58  | 6.72E-04 |
| cg16249711 | <i>TBPL2</i>    | 3.177  | 71  | 91  | 6.72E-04 |
| cg22387994 | <i>NAPA</i>     | -5.045 | 112 | 50  | 6.72E-04 |
| cg04920951 | <i>GSTP1</i>    | -5.376 | 38  | 124 | 6.73E-04 |
| cg17341358 | <i>MRPL1</i>    | -5.415 | 63  | 99  | 6.73E-04 |
| cg13316191 | <i>CDCA7L</i>   | -4.664 | 55  | 107 | 6.73E-04 |
| cg26596161 | <i>SLC26A7</i>  | -3.140 | 56  | 106 | 6.73E-04 |
| cg17452277 | <i>EBAG9</i>    | -5.662 | 59  | 103 | 6.74E-04 |
| cg19337295 | <i>FAM48A</i>   | -4.760 | 86  | 76  | 6.74E-04 |
| cg15602809 | <i>CHRM3</i>    | 0.518  | 67  | 95  | 6.74E-04 |
| cg24297976 | <i>WDR35</i>    | -3.978 | 39  | 123 | 6.74E-04 |
| cg25664034 | <i>FLNC</i>     | -1.644 | 42  | 120 | 6.74E-04 |
| cg10900550 | <i>TDRD7</i>    | -3.295 | 78  | 84  | 6.75E-04 |
| cg02776251 | <i>USP15</i>    | -3.443 | 70  | 92  | 6.76E-04 |
| cg27020281 | <i>NOL11</i>    | -5.439 | 81  | 81  | 6.76E-04 |
| cg15796819 | <i>ALDH3A1</i>  | -1.446 | 75  | 87  | 6.77E-04 |
| cg04483623 | <i>C22orf19</i> | -5.435 | 88  | 74  | 6.78E-04 |
| cg17386991 | <i>POLR3F</i>   | -4.888 | 35  | 127 | 6.78E-04 |
| cg03065661 | <i>CRSP6</i>    | -4.729 | 64  | 98  | 6.78E-04 |
| cg11238505 | <i>CYHR1</i>    | -4.945 | 66  | 96  | 6.78E-04 |
| cg20938286 | <i>CLDND1</i>   | -6.078 | 61  | 101 | 6.79E-04 |
| cg02322621 | <i>ZBTB9</i>    | -3.872 | 21  | 141 | 6.80E-04 |
| cg26624273 | <i>SNIP1</i>    | -4.688 | 67  | 95  | 6.81E-04 |
| cg04548841 | <i>CNIH4</i>    | -4.186 | 54  | 108 | 6.81E-04 |
| cg26415633 | <i>KLK1</i>     | -0.549 | 105 | 57  | 6.81E-04 |
| cg17511416 | <i>C9orf93</i>  | -5.205 | 85  | 77  | 6.82E-04 |
| cg27301343 | <i>EML2</i>     | -3.580 | 119 | 43  | 6.82E-04 |
| cg24580185 | <i>WDSUB1</i>   | -5.180 | 101 | 61  | 6.83E-04 |
| cg19824362 | <i>NR2C1</i>    | -5.717 | 91  | 71  | 6.83E-04 |
| cg03657766 | <i>DLX2</i>     | -4.495 | 84  | 78  | 6.83E-04 |
| cg26039806 | <i>RNF121</i>   | -4.993 | 65  | 97  | 6.84E-04 |
| cg08443351 | <i>ARHGAP19</i> | -4.397 | 65  | 97  | 6.84E-04 |
| cg22688260 | <i>ZCSL2</i>    | -5.216 | 49  | 113 | 6.85E-04 |
| cg07882831 | <i>TTYH2</i>    | -6.107 | 75  | 87  | 6.85E-04 |
| cg02451362 | <i>MAFG</i>     | -5.897 | 69  | 93  | 6.85E-04 |
| cg26190136 | <i>IDH3A</i>    | -3.904 | 68  | 94  | 6.85E-04 |
| cg08724474 | <i>SLC36A1</i>  | -5.244 | 72  | 90  | 6.86E-04 |
| cg11298616 | <i>CKAP2</i>    | -4.731 | 105 | 57  | 6.87E-04 |
| cg10920427 | <i>BXDC1</i>    | -4.542 | 112 | 50  | 6.87E-04 |
| cg27108154 | <i>PDHA2</i>    | 3.878  | 104 | 58  | 6.87E-04 |
| cg11042454 | <i>TUBB2C</i>   | -5.612 | 72  | 90  | 6.87E-04 |
| cg02214188 | <i>BDH2</i>     | -1.270 | 105 | 57  | 6.87E-04 |
| cg08373610 | <i>C2orf11</i>  | -3.183 | 96  | 66  | 6.87E-04 |
| cg17523380 | <i>PPP1R1A</i>  | -4.719 | 63  | 99  | 6.88E-04 |
| cg00793774 | <i>TRIM8</i>    | -5.234 | 36  | 126 | 6.89E-04 |
| cg06532176 | <i>WVOX</i>     | -5.391 | 55  | 107 | 6.89E-04 |
| cg10174687 | <i>FAM98B</i>   | -5.232 | 43  | 119 | 6.89E-04 |
| cg07284407 | <i>GNAS</i>     | 0.486  | 89  | 73  | 6.89E-04 |
| cg09163317 | <i>GALGT</i>    | -4.897 | 82  | 80  | 6.90E-04 |
| cg18079631 | <i>HNRPC</i>    | -4.442 | 53  | 109 | 6.90E-04 |
| cg19078186 | <i>CPNE3</i>    | -4.950 | 58  | 104 | 6.90E-04 |
| cg13962355 | <i>BTRC</i>     | -3.665 | 112 | 50  | 6.90E-04 |
| cg15301700 | <i>SCRT1</i>    | -3.795 | 103 | 59  | 6.90E-04 |

|            |                 |        |     |     |          |
|------------|-----------------|--------|-----|-----|----------|
| cg11736869 | <i>FLJ32312</i> | -1.918 | 49  | 113 | 6.90E-04 |
| cg24332433 | <i>SLC39A11</i> | -4.186 | 133 | 29  | 6.90E-04 |
| cg00425792 | <i>PEX12</i>    | -3.708 | 25  | 137 | 6.91E-04 |
| cg14556618 | <i>IGF2R</i>    | -5.967 | 72  | 90  | 6.91E-04 |
| cg22619563 | <i>EPHA3</i>    | -4.605 | 71  | 91  | 6.91E-04 |
| cg24974130 | <i>RAD50</i>    | -5.007 | 92  | 70  | 6.91E-04 |
| cg13055001 | <i>PPP1CA</i>   | -2.965 | 48  | 114 | 6.92E-04 |
| cg07374145 | <i>ARRDC2</i>   | -5.836 | 48  | 114 | 6.92E-04 |
| cg22821324 | <i>GPM6A</i>    | -3.565 | 67  | 95  | 6.92E-04 |
| cg01366407 | <i>FLAD1</i>    | -4.800 | 56  | 106 | 6.93E-04 |
| cg17732521 | <i>RHOG</i>     | -4.499 | 50  | 112 | 6.93E-04 |
| cg23047681 | <i>HACE1</i>    | -4.910 | 48  | 114 | 6.93E-04 |
| cg00560119 | <i>STXBP1</i>   | -4.779 | 73  | 89  | 6.94E-04 |
| cg06963844 | <i>FBXO6</i>    | -5.402 | 82  | 80  | 6.94E-04 |
| cg15819171 | <i>FLJ23588</i> | -5.009 | 70  | 92  | 6.94E-04 |
| cg11455040 | <i>SLC45A3</i>  | -3.518 | 68  | 94  | 6.94E-04 |
| cg12937434 | <i>BZRAP1</i>   | -2.013 | 122 | 40  | 6.95E-04 |
| cg13501999 | <i>CACNB1</i>   | -4.708 | 46  | 116 | 6.95E-04 |
| cg08269321 | <i>RPRML</i>    | -4.845 | 79  | 83  | 6.95E-04 |
| cg00762512 | <i>LIAS</i>     | -4.829 | 124 | 38  | 6.96E-04 |
| cg01261535 | <i>N-PAC</i>    | -5.184 | 69  | 93  | 6.96E-04 |
| cg10365880 | <i>PKD2L1</i>   | 2.332  | 84  | 78  | 6.96E-04 |
| cg13272327 | <i>ARMC8</i>    | -5.438 | 51  | 111 | 6.96E-04 |
| cg11220635 | <i>RDH11</i>    | -3.554 | 79  | 83  | 6.96E-04 |
| cg22467567 | <i>IGFBP5</i>   | -2.804 | 97  | 65  | 6.96E-04 |
| cg24165760 | <i>TRAF3</i>    | -4.627 | 57  | 105 | 6.96E-04 |
| cg11197066 | <i>PGAP1</i>    | -5.402 | 124 | 38  | 6.97E-04 |
| cg20758803 | <i>MAGI3</i>    | -6.064 | 73  | 89  | 6.97E-04 |
| cg01416012 | <i>BAZ2B</i>    | 1.772  | 113 | 40  | 6.97E-04 |
| cg03980304 | <i>IL4R</i>     | -4.828 | 56  | 106 | 6.97E-04 |
| cg11802013 | <i>CCND1</i>    | 2.137  | 71  | 91  | 6.97E-04 |
| cg06500079 | <i>VPS53</i>    | -2.363 | 67  | 95  | 6.98E-04 |
| cg06286028 | <i>HPS6</i>     | -3.171 | 85  | 77  | 6.98E-04 |
| cg26350286 | <i>RBM35A</i>   | -4.275 | 51  | 111 | 6.98E-04 |
| cg06852744 | <i>AEBP1</i>    | 2.901  | 101 | 61  | 6.99E-04 |
| cg14829378 | <i>B4GALT1</i>  | -5.401 | 90  | 72  | 6.99E-04 |
| cg07321605 | <i>NSF</i>      | 2.264  | 63  | 98  | 6.99E-04 |
| cg02169098 | <i>XRCC6</i>    | -4.929 | 91  | 71  | 6.99E-04 |
| cg12315997 | <i>RPL9</i>     | -2.955 | 91  | 71  | 6.99E-04 |
| cg03231024 | <i>EFNA1</i>    | -4.298 | 43  | 119 | 6.99E-04 |
| cg03328750 | <i>ARHGAP26</i> | -4.086 | 83  | 79  | 6.99E-04 |
| cg16527805 | <i>MDH1</i>     | -4.468 | 64  | 98  | 6.99E-04 |
| cg24141135 | <i>MARS</i>     | -5.545 | 54  | 108 | 6.99E-04 |
| cg06380007 | <i>INOC1</i>    | -5.773 | 58  | 104 | 6.99E-04 |
| cg15298323 | <i>ACAT2</i>    | -0.013 | 70  | 92  | 7.00E-04 |
| cg09156233 | <i>BMPR1B</i>   | -1.893 | 15  | 147 | 7.00E-04 |
| cg23816572 | <i>CEP68</i>    | -5.710 | 47  | 115 | 7.02E-04 |
| cg13404558 | <i>PANK3</i>    | -4.335 | 124 | 38  | 7.02E-04 |
| cg05576974 | <i>UCHL5</i>    | -6.030 | 53  | 109 | 7.02E-04 |
| cg16932672 | <i>KNTC2</i>    | -5.059 | 65  | 97  | 7.02E-04 |
| cg02987051 | <i>IER3IP1</i>  | -5.364 | 49  | 113 | 7.02E-04 |
| cg03839341 | <i>RAB10</i>    | -5.745 | 70  | 92  | 7.02E-04 |
| cg03812679 | <i>CSF3</i>     | -4.330 | 63  | 99  | 7.03E-04 |
| cg09421020 | <i>MEF2B</i>    | -3.173 | 28  | 134 | 7.03E-04 |
| cg00784357 | <i>RAC1</i>     | -5.513 | 85  | 77  | 7.03E-04 |

|            |           |        |     |     |          |
|------------|-----------|--------|-----|-----|----------|
| cg14789804 | OS9       | -4.680 | 80  | 82  | 7.04E-04 |
| cg22153481 | PRKAG1    | -4.904 | 34  | 128 | 7.04E-04 |
| cg18638931 | MOV10L1   | 0.691  | 69  | 93  | 7.04E-04 |
| cg07915282 | RASSF3    | -3.375 | 55  | 107 | 7.04E-04 |
| cg15075170 | TMEFF1    | -4.130 | 79  | 83  | 7.06E-04 |
| cg15820189 | SAP30BP   | -5.040 | 53  | 109 | 7.06E-04 |
| cg00312919 | STARD3NL  | -5.832 | 76  | 86  | 7.08E-04 |
| cg09773756 | MMS19L    | -4.739 | 97  | 65  | 7.08E-04 |
| cg13446852 | LEPR      | -5.928 | 71  | 91  | 7.08E-04 |
| cg24686224 | FARSLB    | -4.960 | 33  | 129 | 7.08E-04 |
| cg00128654 | C14orf102 | -5.619 | 93  | 69  | 7.08E-04 |
| cg12463550 | RCP9      | -5.003 | 63  | 99  | 7.09E-04 |
| cg13266631 | NEFL      | -2.977 | 81  | 81  | 7.09E-04 |
| cg04249030 | COX5A     | -5.922 | 50  | 112 | 7.09E-04 |
| cg08513100 | UBE2B     | -4.366 | 83  | 79  | 7.10E-04 |
| cg06202984 | FANCC     | -4.527 | 101 | 61  | 7.10E-04 |
| cg13859478 | CANX      | -3.364 | 69  | 93  | 7.10E-04 |
| cg26565838 | GALNT10   | -3.489 | 35  | 127 | 7.10E-04 |
| cg18579327 | CREB1     | -4.527 | 80  | 82  | 7.10E-04 |
| cg04790829 | LRRC54    | -5.763 | 109 | 53  | 7.11E-04 |
| cg07780979 | AHRR      | 3.077  | 99  | 63  | 7.11E-04 |
| cg26538349 | FLJ20035  | -5.119 | 59  | 103 | 7.11E-04 |
| cg03405173 | ZNF441    | -4.415 | 63  | 99  | 7.11E-04 |
| cg26428825 | KCNV2     | 2.677  | 80  | 82  | 7.11E-04 |
| cg14197923 | FGF5      | -4.941 | 88  | 74  | 7.13E-04 |
| cg12543649 | THBS3     | -4.765 | 79  | 83  | 7.13E-04 |
| cg05607127 | KCNG3     | -4.187 | 70  | 92  | 7.14E-04 |
| cg07475247 | PMPCB     | -5.033 | 103 | 59  | 7.14E-04 |
| cg11375622 | BOP1      | -4.237 | 96  | 66  | 7.14E-04 |
| cg01371258 | ZNF184    | -5.199 | 56  | 106 | 7.14E-04 |
| cg09384159 | TUBE1     | -5.713 | 72  | 90  | 7.15E-04 |
| cg06420088 | MUC1      | -3.388 | 114 | 48  | 7.15E-04 |
| cg14281160 | C12orf31  | -3.550 | 34  | 128 | 7.16E-04 |
| cg03549127 | GCA       | -3.980 | 32  | 130 | 7.17E-04 |
| cg12693135 | HGS       | -4.886 | 99  | 63  | 7.17E-04 |
| cg14479329 | RNASET2   | -3.154 | 76  | 86  | 7.17E-04 |
| cg16101572 | ZNF219    | -4.949 | 55  | 107 | 7.17E-04 |
| cg01161216 | NULP1     | -4.414 | 50  | 112 | 7.19E-04 |
| cg21491028 | PSMD3     | -4.826 | 85  | 77  | 7.19E-04 |
| cg14862827 | SUSD1     | -4.781 | 133 | 29  | 7.20E-04 |
| cg05590567 | METTL2B   | -4.130 | 67  | 95  | 7.20E-04 |
| cg01426743 | FAM20B    | 1.409  | 52  | 110 | 7.20E-04 |
| cg06667091 | CCNC      | 0.939  | 96  | 66  | 7.20E-04 |
| cg14046986 | RCSD1     | -5.319 | 51  | 111 | 7.20E-04 |
| cg20869710 | APIP      | -5.615 | 84  | 78  | 7.21E-04 |
| cg12581035 | PHC1      | -5.778 | 54  | 108 | 7.21E-04 |
| cg23082632 | B4GALT3   | -4.009 | 46  | 116 | 7.22E-04 |
| cg03912013 | SACM1L    | -4.637 | 52  | 110 | 7.23E-04 |
| cg07034269 | UGCGL1    | -3.765 | 73  | 89  | 7.23E-04 |
| cg16413535 | TKTL2     | 2.947  | 76  | 86  | 7.23E-04 |
| cg09906488 | CAMK1D    | -5.549 | 65  | 97  | 7.23E-04 |
| cg27063607 | MRPL33    | -5.110 | 53  | 109 | 7.23E-04 |
| cg06030619 | CORO1A    | -4.840 | 53  | 109 | 7.24E-04 |
| cg11763112 | C6orf84   | -5.247 | 91  | 71  | 7.24E-04 |
| cg05346899 | LASS4     | -4.493 | 74  | 88  | 7.25E-04 |

|            |                  |        |     |     |          |
|------------|------------------|--------|-----|-----|----------|
| cg14019317 | <i>PROX1</i>     | -4.133 | 69  | 93  | 7.25E-04 |
| cg04525773 | <i>DBF4</i>      | -3.629 | 62  | 100 | 7.26E-04 |
| cg14481222 | <i>BIRC3</i>     | -4.014 | 90  | 72  | 7.26E-04 |
| cg23984059 | <i>COPB</i>      | -4.668 | 42  | 120 | 7.26E-04 |
| cg19730092 | <i>ADAMTS14</i>  | 0.588  | 50  | 112 | 7.27E-04 |
| cg00600684 | <i>BRWD2</i>     | 2.837  | 84  | 78  | 7.27E-04 |
| cg11392765 | <i>BAPX1</i>     | -4.765 | 73  | 89  | 7.27E-04 |
| cg04025889 | <i>AHCY</i>      | -4.663 | 63  | 99  | 7.28E-04 |
| cg25097676 | <i>ARHGAP19</i>  | -4.679 | 55  | 107 | 7.28E-04 |
| cg09874127 | <i>UBE1L</i>     | -4.039 | 31  | 131 | 7.28E-04 |
| cg16889368 | <i>MRPL15</i>    | -4.266 | 74  | 88  | 7.28E-04 |
| cg19800926 | <i>TNFRSF19L</i> | -5.627 | 62  | 100 | 7.29E-04 |
| cg21869055 | <i>KLK10</i>     | -5.047 | 80  | 82  | 7.29E-04 |
| cg16777839 | <i>PHPT1</i>     | -5.097 | 99  | 63  | 7.29E-04 |
| cg13910855 | <i>PBX2</i>      | -4.770 | 100 | 62  | 7.29E-04 |
| cg20053158 | <i>ASCL1</i>     | -3.132 | 94  | 68  | 7.29E-04 |
| cg00702231 | <i>PLAGL1</i>    | 1.204  | 66  | 96  | 7.29E-04 |
| cg02246665 | <i>HCFC2</i>     | -5.253 | 96  | 66  | 7.29E-04 |
| cg03969997 | <i>WBSCR27</i>   | -4.878 | 57  | 105 | 7.29E-04 |
| cg25221625 | <i>CRYBB3</i>    | 2.349  | 75  | 87  | 7.29E-04 |
| cg15972294 | <i>GNAI2</i>     | -3.509 | 28  | 134 | 7.30E-04 |
| cg11489580 | <i>G3BP2</i>     | -4.214 | 98  | 64  | 7.30E-04 |
| cg13804457 | <i>NARG2</i>     | -4.675 | 108 | 54  | 7.30E-04 |
| cg24975769 | <i>ARFIP2</i>    | -5.456 | 83  | 79  | 7.30E-04 |
| cg22520471 | <i>DDX42</i>     | -4.661 | 30  | 132 | 7.30E-04 |
| cg00557354 | <i>ARHGEF7</i>   | -3.971 | 116 | 46  | 7.31E-04 |
| cg15822411 | <i>MGC34732</i>  | 2.102  | 101 | 61  | 7.31E-04 |
| cg21010197 | <i>CDCA8</i>     | -5.642 | 88  | 74  | 7.31E-04 |
| cg19180541 | <i>MOBK12B</i>   | 1.682  | 78  | 84  | 7.31E-04 |
| cg16284168 | <i>AP4M1</i>     | -4.417 | 86  | 76  | 7.33E-04 |
| cg06816106 | <i>SPDY1</i>     | -4.728 | 59  | 103 | 7.33E-04 |
| cg08894534 | <i>FLJ40869</i>  | -4.730 | 95  | 67  | 7.33E-04 |
| cg26233468 | <i>KRTCAP2</i>   | -6.255 | 68  | 94  | 7.33E-04 |
| cg15610792 | <i>C9orf114</i>  | -5.189 | 56  | 106 | 7.34E-04 |
| cg12240824 | <i>ZNF271</i>    | -3.483 | 41  | 121 | 7.34E-04 |
| cg14086033 | <i>FEN1</i>      | -4.747 | 81  | 81  | 7.35E-04 |
| cg05934874 | <i>VPS4B</i>     | -4.408 | 71  | 91  | 7.35E-04 |
| cg00050312 | <i>PRKCA</i>     | -5.493 | 95  | 67  | 7.35E-04 |
| cg19282452 | <i>FLJ46230</i>  | 0.994  | 97  | 65  | 7.35E-04 |
| cg07237830 | <i>BSCL2</i>     | 0.940  | 66  | 96  | 7.37E-04 |
| cg15416577 | <i>CCDC52</i>    | -5.494 | 83  | 79  | 7.37E-04 |
| cg13644052 | <i>PAQR4</i>     | 1.440  | 66  | 96  | 7.37E-04 |
| cg09239756 | <i>CKAP4</i>     | -4.568 | 56  | 106 | 7.37E-04 |
| cg18440188 | <i>MAP4K5</i>    | -5.257 | 96  | 66  | 7.38E-04 |
| cg21450627 | <i>PSD4</i>      | 1.960  | 52  | 110 | 7.38E-04 |
| cg13789523 | <i>DNCL2A</i>    | -6.047 | 80  | 82  | 7.40E-04 |
| cg13760546 | <i>RNF125</i>    | -5.661 | 58  | 104 | 7.40E-04 |
| cg15652797 | <i>TP53AP1</i>   | -4.159 | 89  | 73  | 7.40E-04 |
| cg24123124 | <i>MRPS17</i>    | -4.383 | 85  | 77  | 7.41E-04 |
| cg10126874 | <i>CRY1</i>      | -5.390 | 70  | 92  | 7.41E-04 |
| cg20778294 | <i>PPRC1</i>     | -5.029 | 31  | 131 | 7.42E-04 |
| cg08020381 | <i>IDI1</i>      | -5.515 | 110 | 52  | 7.42E-04 |
| cg24418574 | <i>HADHB</i>     | -2.365 | 40  | 119 | 7.42E-04 |
| cg20951726 | <i>MTMR9</i>     | -4.271 | 92  | 70  | 7.42E-04 |
| cg14281165 | <i>PIGO</i>      | -4.336 | 82  | 80  | 7.45E-04 |

|            |                  |        |     |     |          |
|------------|------------------|--------|-----|-----|----------|
| cg15096123 | <i>KLK4</i>      | 2.616  | 50  | 112 | 7.46E-04 |
| cg12478978 | <i>FLOT1</i>     | -3.977 | 50  | 112 | 7.46E-04 |
| cg16225753 | <i>MAD2L1</i>    | -5.582 | 69  | 93  | 7.46E-04 |
| cg12998491 | <i>FAM78A</i>    | -6.470 | 92  | 70  | 7.46E-04 |
| cg25085950 | <i>ATP5J</i>     | -2.890 | 60  | 102 | 7.46E-04 |
| cg26949796 | <i>CFL2</i>      | -4.530 | 88  | 74  | 7.46E-04 |
| cg25139619 | <i>C13orf25</i>  | -5.197 | 65  | 97  | 7.46E-04 |
| cg01346152 | <i>DHRS3</i>     | -3.282 | 75  | 87  | 7.47E-04 |
| cg06466797 | <i>FLJ22313</i>  | -4.327 | 44  | 118 | 7.47E-04 |
| cg08003150 | <i>KCNQ2</i>     | -5.155 | 42  | 120 | 7.47E-04 |
| cg11960393 | <i>LOX</i>       | -4.817 | 116 | 46  | 7.47E-04 |
| cg23352030 | <i>PRIC285</i>   | 3.675  | 84  | 78  | 7.47E-04 |
| cg20637800 | <i>BRI3</i>      | -5.570 | 38  | 124 | 7.48E-04 |
| cg02702510 | <i>43898</i>     | -3.763 | 103 | 59  | 7.48E-04 |
| cg01182585 | <i>C7orf30</i>   | -4.873 | 112 | 50  | 7.49E-04 |
| cg17788832 | <i>PSKH2</i>     | -1.041 | 72  | 90  | 7.49E-04 |
| cg16860587 | <i>ELAVL1</i>    | -4.714 | 71  | 91  | 7.49E-04 |
| cg13236854 | <i>NAPA</i>      | -6.049 | 76  | 86  | 7.49E-04 |
| cg06577005 | <i>DHDDS</i>     | -3.883 | 105 | 57  | 7.50E-04 |
| cg01997480 | <i>EIF3S8</i>    | -5.630 | 102 | 60  | 7.51E-04 |
| cg09404334 | <i>SNX14</i>     | -3.960 | 42  | 120 | 7.51E-04 |
| cg26264314 | <i>NALP5</i>     | 2.290  | 23  | 134 | 7.51E-04 |
| cg04929736 | <i>CLU</i>       | -4.487 | 61  | 101 | 7.52E-04 |
| cg18022496 | <i>SEN5</i>      | -2.937 | 91  | 71  | 7.52E-04 |
| cg25490410 | <i>TUBGCP5</i>   | -4.033 | 37  | 125 | 7.52E-04 |
| cg04600406 | <i>UQCR</i>      | -5.129 | 51  | 111 | 7.54E-04 |
| cg06251129 | <i>SSR2</i>      | -2.344 | 47  | 115 | 7.54E-04 |
| cg06812033 | <i>NKD1</i>      | -3.949 | 82  | 80  | 7.55E-04 |
| cg25944700 | <i>SLC25A37</i>  | -5.797 | 87  | 75  | 7.55E-04 |
| cg22274662 | <i>FLJ31413</i>  | -4.842 | 74  | 88  | 7.56E-04 |
| cg19506903 | <i>YIPF3</i>     | -5.178 | 73  | 89  | 7.56E-04 |
| cg09868597 | <i>YTHDC2</i>    | -3.769 | 74  | 88  | 7.56E-04 |
| cg11634198 | <i>NEUROD2</i>   | -2.096 | 82  | 80  | 7.56E-04 |
| cg23349242 | <i>SUSD2</i>     | 0.498  | 82  | 80  | 7.56E-04 |
| cg20588892 | <i>MGC33214</i>  | -4.967 | 45  | 117 | 7.57E-04 |
| cg22793458 | <i>ZBTB11</i>    | -5.074 | 94  | 68  | 7.57E-04 |
| cg10058540 | <i>DCTN2</i>     | -4.143 | 41  | 121 | 7.58E-04 |
| cg11485602 | <i>PDHB</i>      | -5.711 | 57  | 105 | 7.58E-04 |
| cg07894717 | <i>CORT</i>      | 3.526  | 92  | 70  | 7.58E-04 |
| cg12711530 | <i>BMP10</i>     | 1.729  | 78  | 83  | 7.58E-04 |
| cg24970539 | <i>RPS6KA4</i>   | -3.556 | 73  | 89  | 7.58E-04 |
| cg13466487 | <i>LOC134147</i> | 3.169  | 83  | 79  | 7.59E-04 |
| cg18824775 | <i>PX19</i>      | -5.811 | 39  | 123 | 7.59E-04 |
| cg14924278 | <i>TACC2</i>     | 0.206  | 84  | 78  | 7.59E-04 |
| cg03955296 | <i>ETV3</i>      | -4.177 | 120 | 42  | 7.61E-04 |
| cg03283842 | <i>FKBP7</i>     | -3.679 | 42  | 120 | 7.61E-04 |
| cg02292024 | <i>TIMM10</i>    | -4.335 | 67  | 95  | 7.61E-04 |
| cg18149919 | <i>SIAHBP1</i>   | 2.367  | 85  | 77  | 7.62E-04 |
| cg18931750 | <i>MGC33407</i>  | 2.958  | 110 | 52  | 7.62E-04 |
| cg06585027 | <i>PIK4CB</i>    | -5.406 | 59  | 103 | 7.63E-04 |
| cg14663065 | <i>CTNNB1</i>    | -5.178 | 113 | 49  | 7.65E-04 |
| cg10488141 | <i>SUFU</i>      | -5.803 | 75  | 87  | 7.65E-04 |
| cg20854748 | <i>PIP5K1A</i>   | -4.665 | 37  | 125 | 7.66E-04 |
| cg12766348 | <i>CLK4</i>      | -5.273 | 79  | 83  | 7.66E-04 |
| cg02788102 | <i>IGSF4</i>     | -3.714 | 108 | 54  | 7.66E-04 |

|            |                  |        |     |     |          |
|------------|------------------|--------|-----|-----|----------|
| cg19596204 | <i>ISYNA1</i>    | -5.806 | 64  | 98  | 7.67E-04 |
| cg18474135 | <i>CDC26</i>     | -4.283 | 81  | 81  | 7.67E-04 |
| cg19389852 | <i>TXNIP</i>     | -3.062 | 73  | 88  | 7.67E-04 |
| cg04780629 | <i>RNF43</i>     | -4.485 | 52  | 110 | 7.67E-04 |
| cg15767406 | <i>ZNF660</i>    | -5.035 | 103 | 59  | 7.67E-04 |
| cg09706243 | <i>POLD4</i>     | -2.740 | 101 | 61  | 7.68E-04 |
| cg23776217 | <i>C18orf10</i>  | -4.454 | 37  | 125 | 7.69E-04 |
| cg07472159 | <i>COL10A1</i>   | 1.838  | 103 | 59  | 7.69E-04 |
| cg18273566 | <i>LOC148898</i> | -4.509 | 46  | 116 | 7.70E-04 |
| cg17565490 | <i>CENPB</i>     | -5.230 | 106 | 56  | 7.72E-04 |
| cg08690031 | <i>CDCA7</i>     | -3.840 | 78  | 84  | 7.72E-04 |
| cg06466479 | <i>RAD1</i>      | 2.738  | 107 | 55  | 7.72E-04 |
| cg21305265 | <i>CDCA2</i>     | -4.853 | 55  | 107 | 7.72E-04 |
| cg23913400 | <i>ITGB4</i>     | -5.434 | 49  | 113 | 7.73E-04 |
| cg11360768 | <i>WHSC1L1</i>   | -6.512 | 81  | 81  | 7.73E-04 |
| cg26845300 | <i>SNX9</i>      | -3.217 | 140 | 22  | 7.74E-04 |
| cg20189937 | <i>L2HGDH</i>    | 1.014  | 61  | 101 | 7.74E-04 |
| cg04005701 | <i>SMYD4</i>     | -4.598 | 113 | 49  | 7.75E-04 |
| cg25060573 | <i>CCND1</i>     | -4.947 | 59  | 103 | 7.75E-04 |
| cg05414225 | <i>C9orf6</i>    | -4.425 | 106 | 56  | 7.75E-04 |
| cg18325289 | <i>USP48</i>     | -5.355 | 65  | 97  | 7.75E-04 |
| cg02582754 | <i>MAS1</i>      | 3.448  | 100 | 62  | 7.76E-04 |
| cg19630506 | <i>SMTN</i>      | -5.136 | 79  | 83  | 7.76E-04 |
| cg14407667 | <i>EPS15</i>     | -4.222 | 55  | 107 | 7.77E-04 |
| cg13797282 | <i>CARD10</i>    | 0.517  | 134 | 28  | 7.77E-04 |
| cg05208153 | <i>C9orf24</i>   | 1.781  | 82  | 80  | 7.78E-04 |
| cg24336531 | <i>ARL6IP5</i>   | -5.003 | 43  | 119 | 7.78E-04 |
| cg17269548 | <i>PPIA</i>      | -1.878 | 92  | 70  | 7.79E-04 |
| cg01906717 | <i>IFNA13</i>    | 1.552  | 66  | 96  | 7.80E-04 |
| cg09950370 | <i>GFRA2</i>     | 3.057  | 68  | 94  | 7.80E-04 |
| cg12733430 | <i>KLHL8</i>     | -4.908 | 119 | 43  | 7.80E-04 |
| cg09338170 | <i>SLC35A3</i>   | -3.914 | 106 | 56  | 7.80E-04 |
| cg00347904 | <i>SCUBE3</i>    | -2.934 | 49  | 113 | 7.80E-04 |
| cg13697387 | <i>LCE2A</i>     | -2.636 | 104 | 58  | 7.81E-04 |
| cg21424904 | <i>GRK6</i>      | -4.621 | 69  | 93  | 7.81E-04 |
| cg08629913 | <i>IGFBP6</i>    | -5.210 | 84  | 78  | 7.82E-04 |
| cg02352653 | <i>SMAD5</i>     | -4.361 | 65  | 97  | 7.82E-04 |
| cg03259469 | <i>SVIL</i>      | -4.037 | 64  | 98  | 7.82E-04 |
| cg27627570 | <i>CEECAM1</i>   | -6.064 | 71  | 91  | 7.83E-04 |
| cg19851137 | <i>IDH3B</i>     | -4.911 | 115 | 47  | 7.83E-04 |
| cg19058629 | <i>RALBP1</i>    | -1.832 | 49  | 111 | 7.83E-04 |
| cg07674153 | <i>TSHR</i>      | -3.958 | 22  | 140 | 7.84E-04 |
| cg08164315 | <i>PTGER4</i>    | -4.121 | 52  | 110 | 7.84E-04 |
| cg20320468 | <i>LAIR1</i>     | 2.309  | 55  | 107 | 7.84E-04 |
| cg01468868 | <i>LIF</i>       | -4.495 | 65  | 97  | 7.85E-04 |
| cg12971338 | <i>TRAF4</i>     | -4.426 | 66  | 96  | 7.85E-04 |
| cg15057726 | <i>MCM2</i>      | -4.553 | 39  | 123 | 7.85E-04 |
| cg03760705 | <i>RNF185</i>    | -3.507 | 53  | 109 | 7.86E-04 |
| cg04134859 | <i>WBSCR22</i>   | -5.533 | 101 | 61  | 7.86E-04 |
| cg25748127 | <i>POLR2L</i>    | -5.306 | 78  | 84  | 7.86E-04 |
| cg17083853 | <i>SURF1</i>     | -5.657 | 55  | 107 | 7.86E-04 |
| cg23018891 | <i>BCAS2</i>     | -4.884 | 119 | 43  | 7.86E-04 |
| cg20739510 | <i>PEX14</i>     | -3.923 | 114 | 48  | 7.86E-04 |
| cg25397779 | <i>MRPL20</i>    | -4.679 | 64  | 98  | 7.89E-04 |
| cg21248774 | <i>SFPQ</i>      | -5.139 | 65  | 97  | 7.90E-04 |

|            |                  |        |     |     |          |
|------------|------------------|--------|-----|-----|----------|
| cg12555907 | <i>MBP</i>       | 0.853  | 88  | 74  | 7.90E-04 |
| cg14576628 | <i>PRMT1</i>     | -4.566 | 88  | 74  | 7.90E-04 |
| cg15648905 | <i>RPL12</i>     | -4.617 | 44  | 118 | 7.90E-04 |
| cg26220985 | <i>DPT</i>       | 1.194  | 58  | 104 | 7.90E-04 |
| cg27465858 | <i>ANKRD40</i>   | -3.844 | 86  | 76  | 7.90E-04 |
| cg06583518 | <i>ZNF571</i>    | -4.560 | 108 | 54  | 7.91E-04 |
| cg18236477 | <i>ATP8A2</i>    | -1.820 | 14  | 148 | 7.91E-04 |
| cg01025762 | <i>DLD</i>       | -3.495 | 132 | 30  | 7.91E-04 |
| cg23859078 | <i>C7orf30</i>   | -5.676 | 66  | 96  | 7.91E-04 |
| cg24274272 | <i>DNAI2</i>     | 5.339  | 100 | 62  | 7.92E-04 |
| cg15147516 | <i>MIXL1</i>     | -3.010 | 85  | 77  | 7.93E-04 |
| cg00929855 | <i>HSPA1A</i>    | -4.367 | 87  | 75  | 7.94E-04 |
| cg03532005 | <i>PSPH</i>      | -4.726 | 49  | 113 | 7.94E-04 |
| cg06134936 | <i>HERC4</i>     | -4.732 | 52  | 110 | 7.94E-04 |
| cg03732056 | <i>DOK2</i>      | -1.402 | 87  | 75  | 7.95E-04 |
| cg08348496 | <i>HAPLN3</i>    | -5.492 | 52  | 110 | 7.95E-04 |
| cg26774312 | <i>CAV2</i>      | -4.742 | 92  | 70  | 7.95E-04 |
| cg10839997 | <i>B3GNT6</i>    | -4.905 | 80  | 82  | 7.95E-04 |
| cg21284731 | <i>DCC</i>       | 1.203  | 33  | 129 | 7.95E-04 |
| cg26089280 | <i>ARMC9</i>     | -5.737 | 59  | 103 | 7.96E-04 |
| cg23029491 | <i>UBAP2</i>     | -5.219 | 105 | 57  | 7.96E-04 |
| cg23521069 | <i>SIP1</i>      | -5.284 | 55  | 107 | 7.96E-04 |
| cg20843052 | <i>KIAA1841</i>  | -4.016 | 82  | 80  | 7.96E-04 |
| cg24975564 | <i>PDE3A</i>     | -4.890 | 70  | 92  | 7.97E-04 |
| cg05119831 | <i>PTPRN2</i>    | -4.483 | 102 | 60  | 7.97E-04 |
| cg08186124 | <i>LZTFL1</i>    | -5.000 | 80  | 82  | 7.97E-04 |
| cg19028369 | <i>C3orf19</i>   | -4.327 | 80  | 82  | 7.97E-04 |
| cg22776578 | <i>CPLX2</i>     | -3.625 | 96  | 66  | 7.97E-04 |
| cg15613982 | <i>SEC23B</i>    | -4.534 | 67  | 95  | 7.98E-04 |
| cg02527529 | <i>C17orf53</i>  | -6.129 | 66  | 96  | 7.98E-04 |
| cg11416386 | <i>DPY19L3</i>   | -5.115 | 57  | 105 | 7.98E-04 |
| cg09102714 | <i>AARS</i>      | -3.391 | 79  | 83  | 7.98E-04 |
| cg03822011 | <i>FANCF</i>     | -5.391 | 46  | 116 | 7.99E-04 |
| cg12187213 | <i>ADAMTS9</i>   | -5.317 | 97  | 65  | 7.99E-04 |
| cg25219134 | <i>IQWD1</i>     | -4.515 | 99  | 63  | 8.00E-04 |
| cg10342590 | <i>MRPL49</i>    | 3.948  | 97  | 65  | 8.01E-04 |
| cg14144305 | <i>ALX4</i>      | -3.386 | 100 | 62  | 8.01E-04 |
| cg26073060 | <i>EIF3S2</i>    | 2.305  | 80  | 82  | 8.01E-04 |
| cg02261346 | <i>MPPED1</i>    | 2.994  | 40  | 122 | 8.01E-04 |
| cg09634469 | <i>SERPIND1</i>  | 2.091  | 98  | 64  | 8.01E-04 |
| cg26164310 | <i>LPPR4</i>     | -3.500 | 73  | 89  | 8.02E-04 |
| cg07858745 | <i>GTF2I</i>     | -4.326 | 71  | 91  | 8.03E-04 |
| cg24835159 | <i>RNF43</i>     | -0.425 | 105 | 57  | 8.03E-04 |
| cg17332016 | <i>FLJ10847</i>  | -5.451 | 99  | 63  | 8.04E-04 |
| cg11599505 | <i>C20orf102</i> | 3.124  | 93  | 69  | 8.04E-04 |
| cg21195414 | <i>ELOVL5</i>    | -5.430 | 62  | 100 | 8.04E-04 |
| cg27212099 | <i>C20orf30</i>  | -4.099 | 64  | 98  | 8.04E-04 |
| cg12052258 | <i>S100A11</i>   | -4.477 | 60  | 102 | 8.05E-04 |
| cg21664828 | <i>ZNF148</i>    | -3.607 | 100 | 62  | 8.05E-04 |
| cg00053647 | <i>C7orf28B</i>  | -3.366 | 72  | 90  | 8.05E-04 |
| cg07000831 | <i>SETDB2</i>    | -5.223 | 73  | 89  | 8.05E-04 |
| cg06807379 | <i>DAPK3</i>     | -5.127 | 118 | 44  | 8.06E-04 |
| cg08524525 | <i>FLJ35630</i>  | -5.840 | 54  | 108 | 8.06E-04 |
| cg13084909 | <i>RNF26</i>     | -5.637 | 44  | 118 | 8.06E-04 |
| cg25371560 | <i>MED18</i>     | -4.934 | 71  | 91  | 8.06E-04 |

|            |                     |        |     |     |          |
|------------|---------------------|--------|-----|-----|----------|
| cg04485075 | <i>NOC2L</i>        | -5.090 | 52  | 110 | 8.07E-04 |
| cg14984307 | <i>ACYP1</i>        | -4.708 | 59  | 103 | 8.07E-04 |
| cg12150066 | <i>GNB1</i>         | -4.364 | 93  | 69  | 8.07E-04 |
| cg15586352 | <i>PSG5</i>         | 0.904  | 53  | 109 | 8.07E-04 |
| cg25807810 | <i>DKFZp434N062</i> | -5.459 | 58  | 104 | 8.07E-04 |
| cg19029220 | <i>UGP2</i>         | -5.099 | 36  | 126 | 8.08E-04 |
| cg01017147 | <i>DNM3</i>         | -1.454 | 66  | 96  | 8.09E-04 |
| cg06597861 | <i>LY6E</i>         | -5.056 | 58  | 104 | 8.09E-04 |
| cg08162572 | <i>CSE1L</i>        | -6.298 | 78  | 84  | 8.09E-04 |
| cg08687825 | <i>PRSS35</i>       | -4.482 | 81  | 81  | 8.09E-04 |
| cg24355091 | <i>PSARL</i>        | -2.848 | 65  | 97  | 8.10E-04 |
| cg17982102 | <i>RAB31</i>        | -3.161 | 88  | 74  | 8.11E-04 |
| cg00224234 | <i>RNMTL1</i>       | -6.436 | 87  | 75  | 8.11E-04 |
| cg06243393 | <i>TXNDC2</i>       | 2.472  | 107 | 55  | 8.11E-04 |
| cg25961684 | <i>STK36</i>        | -4.993 | 56  | 106 | 8.11E-04 |
| cg19450025 | <i>SULT1A3</i>      | -3.247 | 103 | 59  | 8.12E-04 |
| cg15634735 | <i>SAP130</i>       | -4.662 | 41  | 121 | 8.12E-04 |
| cg26574610 | <i>VPREB3</i>       | 1.839  | 96  | 66  | 8.13E-04 |
| cg01050433 | <i>TYRO3</i>        | -3.762 | 129 | 33  | 8.13E-04 |
| cg17542835 | <i>RPL6</i>         | -4.348 | 114 | 48  | 8.15E-04 |
| cg00582628 | <i>RGS20</i>        | -2.333 | 87  | 75  | 8.15E-04 |
| cg24469114 | <i>RCC1</i>         | -5.045 | 92  | 70  | 8.16E-04 |
| cg04322344 | <i>MRPL3</i>        | -5.753 | 54  | 108 | 8.16E-04 |
| cg20185083 | <i>SERPINB9</i>     | 0.315  | 34  | 128 | 8.16E-04 |
| cg21319693 | <i>PRDX1</i>        | -4.351 | 68  | 94  | 8.16E-04 |
| cg21045388 | <i>FLJ43806</i>     | 3.387  | 103 | 59  | 8.16E-04 |
| cg17166101 | <i>PARC</i>         | -4.170 | 52  | 110 | 8.16E-04 |
| cg26910205 | <i>KIAA2010</i>     | -4.767 | 50  | 112 | 8.16E-04 |
| cg19504888 | <i>C2orf33</i>      | 1.722  | 109 | 53  | 8.17E-04 |
| cg05587474 | <i>MOV10</i>        | -4.791 | 94  | 68  | 8.17E-04 |
| cg12402251 | <i>CALB1</i>        | -3.640 | 97  | 65  | 8.17E-04 |
| cg14399656 | <i>ZNF567</i>       | 1.308  | 79  | 83  | 8.18E-04 |
| cg16007628 | <i>ZNF207</i>       | -3.386 | 72  | 90  | 8.18E-04 |
| cg07112154 | <i>MPP2</i>         | -2.498 | 50  | 112 | 8.18E-04 |
| cg02801598 | <i>PDP2</i>         | -4.392 | 69  | 93  | 8.18E-04 |
| cg01221637 | <i>C20orf112</i>    | -5.286 | 87  | 75  | 8.18E-04 |
| cg10035922 | <i>C1orf102</i>     | -4.488 | 46  | 116 | 8.18E-04 |
| cg14896003 | <i>RASSF7</i>       | 2.413  | 107 | 55  | 8.18E-04 |
| cg15753757 | <i>AUTS2</i>        | -4.567 | 38  | 124 | 8.18E-04 |
| cg12911791 | <i>CSHL1</i>        | 0.835  | 43  | 119 | 8.19E-04 |
| cg06615667 | <i>GPR107</i>       | -4.658 | 113 | 49  | 8.21E-04 |
| cg04725234 | <i>TMEM38B</i>      | -4.671 | 100 | 62  | 8.21E-04 |
| cg04819539 | <i>METTL1</i>       | 1.613  | 125 | 37  | 8.21E-04 |
| cg20253551 | <i>ESR1</i>         | -3.956 | 110 | 52  | 8.21E-04 |
| cg26324201 | <i>CDK7</i>         | -3.474 | 29  | 133 | 8.21E-04 |
| cg18206040 | <i>DNAJA2</i>       | -4.949 | 53  | 109 | 8.23E-04 |
| cg16003500 | <i>ADNP</i>         | -3.417 | 31  | 131 | 8.23E-04 |
| cg21655790 | <i>LEPR</i>         | -2.503 | 53  | 109 | 8.23E-04 |
| cg19135982 | <i>SKP2</i>         | -4.332 | 72  | 90  | 8.25E-04 |
| cg15183083 | <i>KCNA4</i>        | -2.446 | 70  | 92  | 8.25E-04 |
| cg16261965 | <i>ARF3</i>         | -3.731 | 130 | 32  | 8.27E-04 |
| cg20139214 | <i>ACACA</i>        | -4.783 | 53  | 109 | 8.27E-04 |
| cg12719235 | <i>POLR2E</i>       | -3.206 | 46  | 116 | 8.27E-04 |
| cg21028326 | <i>TUBGCP6</i>      | -4.538 | 79  | 83  | 8.28E-04 |
| cg27394046 | <i>XRN2</i>         | -3.417 | 102 | 60  | 8.28E-04 |

|            |                  |        |     |     |          |
|------------|------------------|--------|-----|-----|----------|
| cg21596317 | <i>PAM</i>       | -4.029 | 81  | 81  | 8.28E-04 |
| cg05421946 | <i>ABHD6</i>     | -6.018 | 54  | 108 | 8.29E-04 |
| cg20850582 | <i>LRBA</i>      | -4.422 | 76  | 86  | 8.29E-04 |
| cg13679077 | <i>TOMM7</i>     | -4.506 | 63  | 99  | 8.29E-04 |
| cg17877494 | <i>ACAA1</i>     | -4.569 | 66  | 96  | 8.29E-04 |
| cg13798289 | <i>THAP11</i>    | -0.025 | 118 | 44  | 8.30E-04 |
| cg04140754 | <i>ATP6V0A2</i>  | 0.291  | 35  | 127 | 8.31E-04 |
| cg13777411 | <i>HPS5</i>      | -3.920 | 50  | 112 | 8.31E-04 |
| cg24612772 | <i>EXT2</i>      | -3.266 | 67  | 94  | 8.31E-04 |
| cg08633154 | <i>PCGF5</i>     | -5.553 | 97  | 65  | 8.31E-04 |
| cg19567046 | <i>VPS25</i>     | -5.280 | 92  | 70  | 8.32E-04 |
| cg10910775 | <i>CDC27</i>     | 0.950  | 84  | 78  | 8.32E-04 |
| cg16414945 | <i>DUSP12</i>    | -2.666 | 67  | 95  | 8.33E-04 |
| cg27079104 | <i>HEXA</i>      | -4.860 | 31  | 131 | 8.33E-04 |
| cg06665799 | <i>TMED9</i>     | -3.988 | 40  | 122 | 8.33E-04 |
| cg04096365 | <i>IFI30</i>     | -4.611 | 84  | 78  | 8.34E-04 |
| cg03047098 | <i>AP1G1</i>     | -5.167 | 90  | 72  | 8.34E-04 |
| cg26788107 | <i>MGC13096</i>  | -3.152 | 25  | 137 | 8.34E-04 |
| cg20483016 | <i>TTC5</i>      | -3.570 | 71  | 91  | 8.35E-04 |
| cg23378495 | <i>PIGO</i>      | -4.565 | 71  | 91  | 8.35E-04 |
| cg16345880 | <i>SARS</i>      | -3.638 | 66  | 96  | 8.35E-04 |
| cg02008169 | <i>ZNF267</i>    | -3.774 | 129 | 33  | 8.35E-04 |
| cg23662675 | <i>PRKCBP1</i>   | -4.657 | 54  | 108 | 8.35E-04 |
| cg03262773 | <i>RAD54L</i>    | -2.759 | 86  | 76  | 8.35E-04 |
| cg04269351 | <i>VT1B</i>      | 2.772  | 128 | 34  | 8.36E-04 |
| cg04837322 | <i>ROD1</i>      | -4.540 | 98  | 64  | 8.36E-04 |
| cg01255349 | <i>PPFIBP1</i>   | -3.774 | 30  | 132 | 8.37E-04 |
| cg12577610 | <i>SMARCD2</i>   | -5.167 | 39  | 123 | 8.37E-04 |
| cg24341944 | <i>RSRC1</i>     | -5.155 | 61  | 101 | 8.37E-04 |
| cg06638012 | <i>AFF4</i>      | -3.892 | 116 | 46  | 8.38E-04 |
| cg04677227 | <i>LOXL4</i>     | -4.503 | 37  | 125 | 8.38E-04 |
| cg15448599 | <i>C3orf45</i>   | 3.243  | 121 | 41  | 8.39E-04 |
| cg22730042 | <i>U2AF1</i>     | -4.416 | 88  | 74  | 8.39E-04 |
| cg10822116 | <i>TLN1</i>      | -2.861 | 102 | 60  | 8.40E-04 |
| cg21769943 | <i>PIM1</i>      | -5.206 | 82  | 80  | 8.41E-04 |
| cg08183114 | <i>PBX2</i>      | -4.727 | 93  | 69  | 8.41E-04 |
| cg14924091 | <i>D4ST1</i>     | -5.460 | 48  | 114 | 8.41E-04 |
| cg24695828 | <i>ZNF566</i>    | -4.077 | 60  | 102 | 8.41E-04 |
| cg26850145 | <i>ZBTB5</i>     | -5.386 | 51  | 111 | 8.41E-04 |
| cg13306164 | <i>HPCA</i>      | -5.189 | 87  | 75  | 8.41E-04 |
| cg03954150 | <i>FBXO15</i>    | -5.377 | 75  | 87  | 8.41E-04 |
| cg20913782 | <i>LOC113444</i> | -5.582 | 63  | 99  | 8.42E-04 |
| cg03698393 | <i>HAPLN3</i>    | -5.346 | 28  | 134 | 8.43E-04 |
| cg09632416 | <i>TMEM16K</i>   | -5.089 | 118 | 44  | 8.43E-04 |
| cg11119131 | <i>FLJ20364</i>  | -4.700 | 63  | 99  | 8.43E-04 |
| cg14833385 | <i>HLA-DMA</i>   | -4.512 | 34  | 128 | 8.43E-04 |
| cg09935540 | <i>DNAH3</i>     | -4.356 | 58  | 104 | 8.43E-04 |
| cg14617642 | <i>H2AFY2</i>    | -5.118 | 74  | 88  | 8.44E-04 |
| cg27413543 | <i>SEC31L1</i>   | -4.254 | 70  | 92  | 8.45E-04 |
| cg08735298 | <i>C1orf122</i>  | -4.414 | 62  | 100 | 8.45E-04 |
| cg25672287 | <i>DECR2</i>     | -5.972 | 67  | 95  | 8.45E-04 |
| cg01395672 | <i>ZNF207</i>    | -3.818 | 40  | 122 | 8.46E-04 |
| cg19400725 | <i>RILP</i>      | -4.571 | 67  | 95  | 8.47E-04 |
| cg21219744 | <i>GUF1</i>      | -5.264 | 113 | 49  | 8.47E-04 |
| cg11475332 | <i>SDC1</i>      | -5.963 | 104 | 58  | 8.47E-04 |

|            |            |        |     |     |          |
|------------|------------|--------|-----|-----|----------|
| cg11897314 | LOC51334   | -4.217 | 82  | 80  | 8.48E-04 |
| cg16213976 | PIGO       | -4.537 | 113 | 49  | 8.49E-04 |
| cg01879488 | CD44       | -4.557 | 74  | 88  | 8.49E-04 |
| cg14223017 | AP3D1      | -1.709 | 86  | 76  | 8.50E-04 |
| cg15300989 | SIP1       | -5.058 | 63  | 99  | 8.51E-04 |
| cg17239761 | SNAP29     | -4.357 | 49  | 113 | 8.51E-04 |
| cg11114344 | C17orf45   | -4.214 | 110 | 52  | 8.52E-04 |
| cg23219720 | FLJ32110   | -2.570 | 80  | 82  | 8.52E-04 |
| cg04322134 | NUDT2      | -3.897 | 94  | 68  | 8.53E-04 |
| cg00871453 | WDR67      | -3.961 | 81  | 81  | 8.54E-04 |
| cg00292662 | LGALS1     | -5.040 | 84  | 78  | 8.54E-04 |
| cg13337865 | TEKT1      | -4.021 | 84  | 78  | 8.55E-04 |
| cg08261177 | ALDH16A1   | -4.947 | 67  | 95  | 8.56E-04 |
| cg12220493 | TITF1      | -3.665 | 86  | 76  | 8.56E-04 |
| cg13133148 | SNAPC5     | -5.690 | 62  | 100 | 8.57E-04 |
| cg12848131 | KLF5       | -5.863 | 81  | 81  | 8.58E-04 |
| cg04752565 | LOC57228   | -3.085 | 75  | 86  | 8.58E-04 |
| cg11703011 | SERPINE2   | -4.482 | 88  | 74  | 8.58E-04 |
| cg00877887 | LOC405753  | -4.348 | 100 | 62  | 8.58E-04 |
| cg06327515 | PCDHB14    | -1.894 | 107 | 55  | 8.58E-04 |
| cg03640944 | KIAA1754   | 1.244  | 92  | 70  | 8.59E-04 |
| cg26295990 | FLJ23436   | -4.417 | 73  | 89  | 8.60E-04 |
| cg17709676 | LMAN1      | -5.402 | 60  | 102 | 8.60E-04 |
| cg18050213 | FAM14A     | -5.669 | 111 | 51  | 8.61E-04 |
| cg06513075 | NAT10      | -4.382 | 41  | 121 | 8.61E-04 |
| cg07554030 | NAGLU      | -2.624 | 124 | 38  | 8.61E-04 |
| cg15177917 | DAND5      | -1.465 | 54  | 108 | 8.61E-04 |
| cg01773854 | IGFBP6     | -3.490 | 69  | 93  | 8.61E-04 |
| cg18931421 | KIAA0090   | -4.401 | 57  | 105 | 8.62E-04 |
| cg03751799 | SRPRB      | -4.412 | 77  | 85  | 8.62E-04 |
| cg17155167 | RIT1       | -3.363 | 93  | 69  | 8.62E-04 |
| cg17498523 | GTF2A1     | -5.986 | 109 | 53  | 8.63E-04 |
| cg15078479 | PARP2      | -6.042 | 62  | 100 | 8.64E-04 |
| cg14329976 | NEIL2      | -4.023 | 106 | 56  | 8.64E-04 |
| cg19944367 | RGS3       | 3.083  | 90  | 72  | 8.64E-04 |
| cg04435420 | SGCD       | -2.719 | 110 | 52  | 8.65E-04 |
| cg01462829 | HS3ST1     | -5.055 | 125 | 37  | 8.65E-04 |
| cg16518291 | ZNF272     | -5.204 | 104 | 58  | 8.65E-04 |
| cg01968178 | REEP1      | -3.546 | 80  | 82  | 8.66E-04 |
| cg09980522 | GRIA4      | -1.242 | 90  | 72  | 8.67E-04 |
| cg09882647 | C20orf35   | -3.244 | 89  | 73  | 8.68E-04 |
| cg06145308 | CNOT4      | -4.657 | 52  | 110 | 8.69E-04 |
| cg19918758 | VAV3       | -5.588 | 48  | 114 | 8.69E-04 |
| cg12999103 | ATP13A2    | -3.998 | 85  | 77  | 8.71E-04 |
| cg18619267 | LOC389199  | -4.295 | 63  | 99  | 8.71E-04 |
| cg13351583 | SHC3       | -2.230 | 70  | 92  | 8.71E-04 |
| cg03517000 | GSTA2      | 2.758  | 73  | 89  | 8.72E-04 |
| cg05139924 | LZTR1      | -5.148 | 72  | 90  | 8.72E-04 |
| cg20882852 | PKIB       | -4.724 | 59  | 103 | 8.72E-04 |
| cg17386433 | FAM76A     | -5.090 | 59  | 103 | 8.72E-04 |
| cg16159313 | ACY1       | 3.922  | 81  | 81  | 8.73E-04 |
| cg21522303 | ST6GALNAC2 | -5.101 | 61  | 101 | 8.74E-04 |
| cg00367438 | C7orf21    | -4.519 | 85  | 77  | 8.74E-04 |
| cg05501658 | E2F4       | -5.094 | 101 | 61  | 8.74E-04 |
| cg06273569 | PMS2L3     | -4.736 | 43  | 119 | 8.75E-04 |

|            |                 |        |     |     |          |
|------------|-----------------|--------|-----|-----|----------|
| cg12770741 | <i>NXN</i>      | 0.784  | 125 | 37  | 8.76E-04 |
| cg23897067 | <i>NDOR1</i>    | -6.074 | 80  | 82  | 8.76E-04 |
| cg17606683 | <i>HSPC138</i>  | -4.747 | 64  | 98  | 8.77E-04 |
| cg11255230 | <i>BCL2</i>     | -4.856 | 55  | 107 | 8.77E-04 |
| cg26832142 | <i>PDE4B</i>    | -3.295 | 74  | 88  | 8.77E-04 |
| cg04270835 | <i>SLC17A6</i>  | -3.849 | 106 | 52  | 8.77E-04 |
| cg17568035 | <i>FLOT2</i>    | -5.266 | 80  | 82  | 8.78E-04 |
| cg08491025 | <i>SLC16A1</i>  | -5.303 | 110 | 52  | 8.78E-04 |
| cg13145458 | <i>RNF185</i>   | -5.380 | 67  | 95  | 8.78E-04 |
| cg03309050 | <i>ZNF688</i>   | -4.908 | 58  | 104 | 8.78E-04 |
| cg13908518 | <i>AMY2B</i>    | 3.166  | 75  | 87  | 8.79E-04 |
| cg24870273 | <i>STK19</i>    | 1.770  | 66  | 96  | 8.79E-04 |
| cg02904235 | <i>RPS6KA5</i>  | -4.720 | 36  | 126 | 8.79E-04 |
| cg04757093 | <i>RUNX3</i>    | 0.904  | 61  | 101 | 8.79E-04 |
| cg08835688 | <i>GRB10</i>    | 0.932  | 85  | 77  | 8.80E-04 |
| cg05739825 | <i>EI24</i>     | -4.726 | 87  | 75  | 8.81E-04 |
| cg01103836 | <i>MYO9B</i>    | 5.634  | 91  | 71  | 8.82E-04 |
| cg18567470 | <i>ARHGEF12</i> | -4.023 | 88  | 74  | 8.83E-04 |
| cg10002103 | <i>SLC38A2</i>  | -4.985 | 56  | 106 | 8.83E-04 |
| cg02579736 | <i>FANCD2</i>   | -4.000 | 120 | 42  | 8.83E-04 |
| cg19287114 | <i>SLC44A1</i>  | -4.956 | 33  | 129 | 8.83E-04 |
| cg24329717 | <i>P2RX3</i>    | 3.798  | 48  | 114 | 8.85E-04 |
| cg02377083 | <i>CCBP2</i>    | 3.234  | 47  | 115 | 8.85E-04 |
| cg25263140 | <i>AIM1</i>     | -4.935 | 80  | 82  | 8.86E-04 |
| cg22781397 | <i>CDK2</i>     | -5.058 | 49  | 113 | 8.86E-04 |
| cg25549413 | <i>ZNF688</i>   | -3.860 | 119 | 43  | 8.87E-04 |
| cg27277403 | <i>KMO</i>      | -3.125 | 38  | 124 | 8.88E-04 |
| cg13132204 | <i>ELMOD2</i>   | -6.357 | 113 | 49  | 8.88E-04 |
| cg11539173 | <i>GNB1L</i>    | -5.591 | 43  | 119 | 8.90E-04 |
| cg14689355 | <i>ACVR2A</i>   | -4.648 | 84  | 78  | 8.90E-04 |
| cg07510052 | <i>HIGD2A</i>   | -2.778 | 67  | 95  | 8.90E-04 |
| cg07668036 | <i>PSMD4</i>    | -5.012 | 98  | 64  | 8.91E-04 |
| cg26625319 | <i>BRRN1</i>    | -5.520 | 57  | 105 | 8.91E-04 |
| cg00539716 | <i>HTLF</i>     | -3.679 | 82  | 80  | 8.91E-04 |
| cg25523753 | <i>ABHD2</i>    | -3.461 | 60  | 102 | 8.91E-04 |
| cg25479216 | <i>NANS</i>     | -5.100 | 45  | 117 | 8.91E-04 |
| cg19148051 | <i>LRRC47</i>   | -4.771 | 46  | 116 | 8.92E-04 |
| cg26490839 | <i>RPS11</i>    | -4.488 | 72  | 90  | 8.92E-04 |
| cg19243777 | <i>BHLHB3</i>   | -4.375 | 66  | 96  | 8.92E-04 |
| cg21910663 | <i>MVD</i>      | -3.745 | 51  | 111 | 8.92E-04 |
| cg23242017 | <i>LMTK2</i>    | -5.158 | 29  | 133 | 8.92E-04 |
| cg01465325 | <i>ERCC6</i>    | -3.862 | 52  | 110 | 8.93E-04 |
| cg14647515 | <i>C10orf12</i> | 2.498  | 143 | 19  | 8.93E-04 |
| cg22243662 | <i>ATP6V1C2</i> | -4.708 | 126 | 36  | 8.93E-04 |
| cg07807817 | <i>C14orf44</i> | -3.449 | 98  | 64  | 8.94E-04 |
| cg26872475 | <i>NOD9</i>     | -4.200 | 80  | 82  | 8.95E-04 |
| cg23815000 | <i>LCN1</i>     | 1.652  | 72  | 90  | 8.95E-04 |
| cg11735358 | <i>ATP5F1</i>   | -5.698 | 51  | 111 | 8.95E-04 |
| cg11808874 | <i>FLJ14668</i> | 1.175  | 85  | 77  | 8.96E-04 |
| cg13221588 | <i>TTF2</i>     | -4.871 | 83  | 79  | 8.96E-04 |
| cg03679305 | <i>SLC2A5</i>   | -1.700 | 75  | 87  | 8.96E-04 |
| cg12686915 | <i>EIF3S3</i>   | -3.869 | 73  | 89  | 8.97E-04 |
| cg00810473 | <i>SNX22</i>    | -4.827 | 75  | 87  | 8.97E-04 |
| cg06186973 | <i>YWHAG</i>    | -5.829 | 111 | 51  | 8.97E-04 |
| cg14294758 | <i>LSAMP</i>    | -3.169 | 79  | 83  | 8.97E-04 |

|            |          |        |     |     |          |
|------------|----------|--------|-----|-----|----------|
| cg21688707 | MASA     | -4.650 | 51  | 111 | 8.97E-04 |
| cg26209058 | EIF5A2   | -5.747 | 100 | 62  | 8.97E-04 |
| cg14440934 | ZDHHC1   | -2.483 | 42  | 118 | 8.97E-04 |
| cg16970828 | UBE1L    | -4.889 | 57  | 105 | 8.97E-04 |
| cg22188495 | PRICKLE1 | -4.809 | 127 | 35  | 8.98E-04 |
| cg12930602 | DIPA     | -3.878 | 37  | 125 | 8.98E-04 |
| cg19514961 | LENG8    | -3.367 | 24  | 138 | 8.98E-04 |
| cg12254515 | DERL1    | -4.948 | 32  | 130 | 8.99E-04 |
| cg21927975 | GPR153   | -3.918 | 69  | 93  | 8.99E-04 |
| cg10373645 | DUSP11   | -4.800 | 50  | 112 | 9.00E-04 |
| cg22903365 | KIAA0423 | -5.377 | 100 | 62  | 9.00E-04 |
| cg04807655 | TIAM1    | -4.438 | 74  | 88  | 9.00E-04 |
| cg10533434 | SERPINB3 | 0.719  | 66  | 96  | 9.00E-04 |
| cg19751951 | GYG1     | -5.798 | 76  | 86  | 9.02E-04 |
| cg19863773 | OXER1    | 3.022  | 115 | 47  | 9.02E-04 |
| cg09357097 | HOXB7    | -3.257 | 104 | 58  | 9.02E-04 |
| cg01962969 | CBR1     | -4.437 | 51  | 111 | 9.03E-04 |
| cg04155026 | TSNAXIP1 | -3.953 | 73  | 89  | 9.03E-04 |
| cg12986021 | DIRAS3   | -0.440 | 109 | 53  | 9.03E-04 |
| cg23062876 | DBT      | -4.153 | 52  | 110 | 9.04E-04 |
| cg23912721 | PHYH2    | -4.853 | 69  | 93  | 9.04E-04 |
| cg10581256 | ZNF11B   | -5.774 | 39  | 123 | 9.04E-04 |
| cg13456653 | DNAJB6   | -4.391 | 50  | 112 | 9.04E-04 |
| cg14013300 | XBP1     | -4.663 | 103 | 59  | 9.04E-04 |
| cg06207460 | AK3      | -2.594 | 107 | 55  | 9.05E-04 |
| cg16097079 | HLA-C    | -4.062 | 75  | 87  | 9.05E-04 |
| cg21842664 | CAB39    | -4.978 | 60  | 102 | 9.06E-04 |
| cg12661229 | C3orf54  | -5.119 | 39  | 123 | 9.07E-04 |
| cg11843691 | TBC1D9   | -4.498 | 91  | 71  | 9.08E-04 |
| cg12374721 | PRAC     | -2.973 | 88  | 74  | 9.08E-04 |
| cg15312298 | FAM84B   | -1.326 | 43  | 119 | 9.08E-04 |
| cg07466531 | SRP14    | -5.159 | 99  | 63  | 9.09E-04 |
| cg23653712 | SGCB     | -4.181 | 48  | 114 | 9.09E-04 |
| cg27124774 | PCDHB10  | -3.680 | 84  | 78  | 9.09E-04 |
| cg24063470 | FOXC2    | -4.413 | 93  | 69  | 9.10E-04 |
| cg07293947 | SFXN1    | -4.109 | 106 | 56  | 9.10E-04 |
| cg10922622 | FSD1NL   | -5.066 | 58  | 104 | 9.11E-04 |
| cg11468462 | NXPH4    | -4.709 | 40  | 122 | 9.11E-04 |
| cg20551517 | GIP      | 2.146  | 64  | 98  | 9.11E-04 |
| cg25771201 | SCDR10   | 1.396  | 64  | 98  | 9.11E-04 |
| cg26272237 | FLJ12118 | -5.521 | 84  | 78  | 9.11E-04 |
| cg04576021 | HLA-DOB  | 2.233  | 83  | 79  | 9.11E-04 |
| cg03050522 | ARHGEF1  | -4.517 | 48  | 114 | 9.13E-04 |
| cg01046174 | PIP5K3   | -5.734 | 65  | 97  | 9.13E-04 |
| cg05764607 | PHF22    | -5.768 | 83  | 79  | 9.13E-04 |
| cg26759551 | FBP1     | -4.610 | 66  | 96  | 9.13E-04 |
| cg08411049 | SERPINB5 | 2.237  | 47  | 115 | 9.14E-04 |
| cg15944762 | SPAG9    | -4.833 | 54  | 108 | 9.14E-04 |
| cg12304441 | USP15    | -4.571 | 65  | 97  | 9.16E-04 |
| cg06066303 | MS4A5    | 2.196  | 128 | 34  | 9.16E-04 |
| cg07955828 | DHX35    | -4.477 | 68  | 94  | 9.16E-04 |
| cg10164686 | SERPINB6 | -4.509 | 41  | 121 | 9.16E-04 |
| cg08229627 | NPHP1    | -5.281 | 77  | 85  | 9.17E-04 |
| cg14030083 | CDR2L    | -4.096 | 78  | 84  | 9.17E-04 |
| cg20850981 | ZNF323   | 0.933  | 68  | 94  | 9.17E-04 |

|            |              |        |     |     |          |
|------------|--------------|--------|-----|-----|----------|
| cg24194539 | AIM1         | -5.512 | 57  | 105 | 9.18E-04 |
| cg10322308 | PARS2        | -5.294 | 71  | 91  | 9.18E-04 |
| cg23282674 | IL20         | 1.553  | 65  | 97  | 9.21E-04 |
| cg17778721 | CBX1         | -4.755 | 78  | 84  | 9.21E-04 |
| cg23910835 | SFRP2        | -4.180 | 102 | 60  | 9.21E-04 |
| cg24770649 | KIAA1539     | -4.275 | 52  | 110 | 9.23E-04 |
| cg06347928 | IFIH1        | -4.892 | 49  | 113 | 9.24E-04 |
| cg26808606 | COX17        | -0.546 | 105 | 57  | 9.24E-04 |
| cg05684015 | DR1          | -4.878 | 26  | 136 | 9.24E-04 |
| cg08321330 | TPSB2        | 1.631  | 53  | 109 | 9.25E-04 |
| cg08307039 | TRIM23       | -4.718 | 69  | 93  | 9.26E-04 |
| cg22902083 | CNN2         | -3.790 | 121 | 41  | 9.26E-04 |
| cg12520111 | PPIA         | -5.477 | 99  | 63  | 9.27E-04 |
| cg01116966 | TCF7         | -5.859 | 66  | 96  | 9.27E-04 |
| cg27490193 | HINT2        | -5.183 | 93  | 69  | 9.27E-04 |
| cg03950009 | STX17        | -4.641 | 38  | 124 | 9.27E-04 |
| cg25191725 | PYY2         | 2.966  | 124 | 38  | 9.27E-04 |
| cg23350087 | MCOLN1       | -5.713 | 98  | 64  | 9.28E-04 |
| cg01282074 | NKX2-5       | -4.160 | 100 | 62  | 9.28E-04 |
| cg11701148 | MYOM2        | -2.341 | 51  | 111 | 9.28E-04 |
| cg20708411 | CSNK1G3      | -4.422 | 89  | 73  | 9.28E-04 |
| cg10593493 | HOXC6        | -3.852 | 68  | 94  | 9.28E-04 |
| cg19853703 | APOL6        | -4.152 | 46  | 116 | 9.29E-04 |
| cg04557868 | REL          | -3.933 | 39  | 123 | 9.29E-04 |
| cg14046365 | NMI          | -3.976 | 50  | 112 | 9.29E-04 |
| cg04508286 | 44081        | -5.285 | 53  | 109 | 9.29E-04 |
| cg02966329 | TTK          | -4.596 | 77  | 85  | 9.30E-04 |
| cg14298726 | KFZP686A1012 | -3.131 | 49  | 113 | 9.30E-04 |
| cg24030627 | FCGBP        | 2.665  | 78  | 84  | 9.30E-04 |
| cg19921389 | GP9          | 2.849  | 105 | 57  | 9.31E-04 |
| cg16188243 | SGTA         | -3.505 | 82  | 80  | 9.31E-04 |
| cg06718696 | DDX48        | -5.314 | 89  | 73  | 9.31E-04 |
| cg27519236 | KIFC3        | -5.839 | 65  | 97  | 9.31E-04 |
| cg07958192 | TIGD2        | 0.123  | 15  | 146 | 9.31E-04 |
| cg10348643 | C1orf198     | -5.005 | 78  | 84  | 9.31E-04 |
| cg08512940 | PRPF40B      | -5.461 | 91  | 71  | 9.32E-04 |
| cg24836175 | CSNK2B       | -4.490 | 133 | 29  | 9.32E-04 |
| cg17386819 | PRDX6        | -5.116 | 76  | 86  | 9.32E-04 |
| cg12428604 | TMEM60       | -5.210 | 42  | 120 | 9.32E-04 |
| cg02740128 | DLG4         | -3.368 | 68  | 94  | 9.34E-04 |
| cg15971836 | KIAA1212     | -4.508 | 66  | 96  | 9.34E-04 |
| cg24200059 | FLJ22222     | -2.976 | 85  | 77  | 9.34E-04 |
| cg24138639 | TEGT         | -5.420 | 82  | 80  | 9.35E-04 |
| cg18656170 | LTB          | 2.555  | 127 | 35  | 9.35E-04 |
| cg15683488 | ZFYVE9       | -3.612 | 90  | 72  | 9.36E-04 |
| cg00777555 | ARF4         | -5.568 | 70  | 92  | 9.37E-04 |
| cg14279899 | IFNGR1       | -2.945 | 82  | 80  | 9.37E-04 |
| cg01803810 | TSEN54       | -6.005 | 76  | 86  | 9.39E-04 |
| cg07309102 | KLF4         | -5.199 | 113 | 49  | 9.39E-04 |
| cg11206667 | FBXO36       | -5.576 | 81  | 81  | 9.39E-04 |
| cg05731779 | MGC13034     | 2.803  | 63  | 99  | 9.39E-04 |
| cg18887228 | PHF3         | 2.509  | 122 | 40  | 9.39E-04 |
| cg01428361 | RSAD1        | -5.619 | 58  | 104 | 9.39E-04 |
| cg24767315 | CAPN10       | -5.763 | 36  | 126 | 9.40E-04 |
| cg12195135 | ZNF584       | -2.554 | 90  | 72  | 9.40E-04 |

|            |           |        |     |     |          |
|------------|-----------|--------|-----|-----|----------|
| cg17711870 | WWP1      | -2.509 | 79  | 83  | 9.40E-04 |
| cg15563952 | DHTKD1    | -3.911 | 46  | 116 | 9.40E-04 |
| cg23202409 | C11orf48  | -5.725 | 66  | 96  | 9.40E-04 |
| cg13391638 | FLJ13576  | -2.804 | 39  | 123 | 9.40E-04 |
| cg23830326 | NHN1      | -4.944 | 48  | 114 | 9.41E-04 |
| cg21829265 | ZNF451    | -4.471 | 91  | 71  | 9.42E-04 |
| cg05300132 | EXDL2     | 3.395  | 111 | 51  | 9.43E-04 |
| cg23749760 | ZNF467    | -2.815 | 81  | 81  | 9.43E-04 |
| cg08440425 | LRRC51    | -2.719 | 102 | 60  | 9.43E-04 |
| cg03854071 | NDUFA13   | 4.131  | 78  | 84  | 9.44E-04 |
| cg00186141 | PODXL     | -5.358 | 83  | 79  | 9.44E-04 |
| cg26822241 | CYP2C9    | 2.612  | 56  | 106 | 9.44E-04 |
| cg16652259 | DLX1      | -2.214 | 57  | 105 | 9.44E-04 |
| cg15802898 | FOXE1     | -3.929 | 87  | 75  | 9.44E-04 |
| cg12266024 | DRCTNNB1A | -5.010 | 58  | 104 | 9.44E-04 |
| cg01063813 | STAT6     | -3.452 | 53  | 109 | 9.45E-04 |
| cg18349835 | VIPR2     | -5.585 | 105 | 57  | 9.45E-04 |
| cg20239949 | NSMAF     | -4.575 | 114 | 48  | 9.45E-04 |
| cg14542238 | TGOLN2    | -4.907 | 97  | 65  | 9.47E-04 |
| cg13216351 | MOCS3     | -4.834 | 98  | 64  | 9.48E-04 |
| cg12460105 | RAD17     | -5.379 | 77  | 85  | 9.49E-04 |
| cg02715115 | LOC90826  | -4.237 | 104 | 58  | 9.49E-04 |
| cg00821764 | UMPS      | -5.722 | 99  | 63  | 9.50E-04 |
| cg11519508 | TP53      | -4.690 | 31  | 131 | 9.51E-04 |
| cg20314325 | CASC5     | -5.270 | 79  | 83  | 9.51E-04 |
| cg12146151 | ITGB4     | -1.111 | 112 | 50  | 9.52E-04 |
| cg23286660 | PLOD1     | -4.667 | 52  | 110 | 9.52E-04 |
| cg09045681 | TCF19     | -3.667 | 103 | 59  | 9.52E-04 |
| cg01144286 | C20orf103 | -3.879 | 75  | 87  | 9.53E-04 |
| cg09084200 | hCAP-D3   | -1.778 | 111 | 51  | 9.54E-04 |
| cg10375802 | C1orf57   | -4.435 | 129 | 33  | 9.55E-04 |
| cg20572838 | EME1      | -4.596 | 75  | 87  | 9.55E-04 |
| cg11010122 | DNAJB14   | -4.639 | 80  | 82  | 9.55E-04 |
| cg11676599 | PLEKHA1   | -4.610 | 78  | 84  | 9.55E-04 |
| cg15619794 | IL5       | 2.133  | 68  | 94  | 9.56E-04 |
| cg05237543 | MTDH      | -4.102 | 53  | 109 | 9.56E-04 |
| cg04618528 | KRTHA6    | 2.680  | 78  | 84  | 9.56E-04 |
| cg21943652 | HIPK1     | -5.677 | 71  | 91  | 9.57E-04 |
| cg13297960 | NCAM2     | -3.337 | 64  | 98  | 9.57E-04 |
| cg02677802 | ITPR2     | 1.200  | 49  | 113 | 9.58E-04 |
| cg23623692 | ATP10A    | 2.190  | 92  | 70  | 9.58E-04 |
| cg25784394 | TROAP     | -5.103 | 58  | 104 | 9.58E-04 |
| cg19914607 | SLC38A3   | -3.151 | 93  | 69  | 9.58E-04 |
| cg22349489 | HIST1H2AH | -4.226 | 86  | 76  | 9.60E-04 |
| cg13802966 | CASP1     | -1.353 | 126 | 36  | 9.60E-04 |
| cg06537829 | UBB       | -4.469 | 53  | 109 | 9.61E-04 |
| cg01087382 | MAP3K7    | -4.357 | 63  | 99  | 9.62E-04 |
| cg20840847 | APBA2     | 2.107  | 32  | 130 | 9.63E-04 |
| cg09435090 | QDPR      | -4.050 | 48  | 114 | 9.63E-04 |
| cg01939597 | ETV6      | -5.311 | 68  | 94  | 9.63E-04 |
| cg14833160 | BAX       | -3.725 | 102 | 60  | 9.64E-04 |
| cg02742971 | OSR1      | -4.430 | 62  | 100 | 9.64E-04 |
| cg13436799 | LRP2      | -3.919 | 77  | 85  | 9.65E-04 |
| cg23337754 | CRABP1    | -4.578 | 72  | 90  | 9.65E-04 |
| cg03532957 | CHSY1     | -4.103 | 75  | 87  | 9.65E-04 |

|            |                  |        |     |     |          |
|------------|------------------|--------|-----|-----|----------|
| cg24371383 | <i>CEP55</i>     | -5.026 | 60  | 102 | 9.67E-04 |
| cg04195527 | <i>INSIG2</i>    | -4.094 | 52  | 110 | 9.67E-04 |
| cg10797910 | <i>SNF1LK2</i>   | -5.707 | 60  | 102 | 9.67E-04 |
| cg15257765 | <i>MRPL46</i>    | -4.673 | 69  | 93  | 9.67E-04 |
| cg03389111 | <i>HRB2</i>      | -4.190 | 100 | 62  | 9.67E-04 |
| cg18424538 | <i>CNO</i>       | -5.573 | 44  | 118 | 9.68E-04 |
| cg05720937 | <i>ACTR1B</i>    | -5.733 | 62  | 100 | 9.68E-04 |
| cg15566222 | <i>LEREPO4</i>   | -5.525 | 35  | 127 | 9.68E-04 |
| cg19817399 | <i>CYP1A1</i>    | -4.165 | 100 | 62  | 9.68E-04 |
| cg21785536 | <i>AER61</i>     | -3.505 | 46  | 116 | 9.69E-04 |
| cg24558204 | <i>HBS1L</i>     | -5.557 | 119 | 43  | 9.69E-04 |
| cg27461196 | <i>FXYP1</i>     | 0.411  | 97  | 65  | 9.69E-04 |
| cg08169325 | <i>EPIM</i>      | -4.343 | 40  | 122 | 9.73E-04 |
| cg01183669 | <i>ST7L</i>      | -5.455 | 50  | 112 | 9.73E-04 |
| cg13788301 | <i>TOM1</i>      | -5.321 | 101 | 61  | 9.74E-04 |
| cg17731079 | <i>CDC42EP3</i>  | -6.506 | 60  | 102 | 9.74E-04 |
| cg11277230 | <i>MGC26744</i>  | -3.090 | 68  | 94  | 9.74E-04 |
| cg20699736 | <i>VAX2</i>      | -4.045 | 71  | 91  | 9.75E-04 |
| cg07290435 | <i>CDH10</i>     | -2.511 | 65  | 97  | 9.75E-04 |
| cg14159894 | <i>BTBD3</i>     | -4.713 | 114 | 48  | 9.75E-04 |
| cg16505687 | <i>GPR137B</i>   | -4.985 | 94  | 68  | 9.75E-04 |
| cg25776555 | <i>ZNF614</i>    | -4.340 | 71  | 91  | 9.75E-04 |
| cg24664861 | <i>SPAG16</i>    | -5.324 | 76  | 86  | 9.76E-04 |
| cg00051979 | <i>C10orf4</i>   | -4.038 | 56  | 106 | 9.76E-04 |
| cg14743462 | <i>HIST3H2A</i>  | -4.798 | 99  | 63  | 9.76E-04 |
| cg11808544 | <i>FKBP9L</i>    | -1.394 | 67  | 95  | 9.76E-04 |
| cg24793903 | <i>SCRN2</i>     | -5.365 | 62  | 100 | 9.76E-04 |
| cg25924032 | <i>BMS1L</i>     | -5.370 | 70  | 92  | 9.77E-04 |
| cg06816161 | <i>EZH2</i>      | -5.360 | 61  | 101 | 9.79E-04 |
| cg07114894 | <i>ZNF23</i>     | -4.223 | 77  | 85  | 9.80E-04 |
| cg21675030 | <i>ABHD10</i>    | -4.939 | 123 | 39  | 9.80E-04 |
| cg24743283 | <i>GNA12</i>     | -4.199 | 35  | 127 | 9.80E-04 |
| cg25488082 | <i>LOC116143</i> | -4.398 | 57  | 105 | 9.80E-04 |
| cg17063018 | <i>FBXO28</i>    | -4.872 | 77  | 85  | 9.81E-04 |
| cg17741106 | <i>RDH14</i>     | -5.068 | 98  | 64  | 9.81E-04 |
| cg05776763 | <i>DLST</i>      | -4.048 | 86  | 76  | 9.81E-04 |
| cg07658718 | <i>CDK5R1</i>    | -3.985 | 64  | 98  | 9.82E-04 |
| cg23347400 | <i>RBM4B</i>     | -5.784 | 81  | 81  | 9.82E-04 |
| cg07064406 | <i>YWHAB</i>     | 2.965  | 94  | 68  | 9.82E-04 |
| cg15309066 | <i>CYCS</i>      | -5.833 | 105 | 57  | 9.82E-04 |
| cg22058458 | <i>HMGN3</i>     | -5.735 | 44  | 118 | 9.82E-04 |
| cg05263682 | <i>RNGTT</i>     | -4.106 | 114 | 48  | 9.83E-04 |
| cg16521836 | <i>KIAA1407</i>  | -4.847 | 41  | 121 | 9.83E-04 |
| cg25841987 | <i>C4orf18</i>   | -3.845 | 52  | 110 | 9.83E-04 |
| cg00221494 | <i>FARP1</i>     | -1.597 | 85  | 77  | 9.84E-04 |
| cg13397365 | <i>MEA1</i>      | -5.078 | 75  | 87  | 9.84E-04 |
| cg11912049 | <i>AQP6</i>      | -6.198 | 98  | 64  | 9.85E-04 |
| cg03139057 | <i>DLL3</i>      | -4.027 | 83  | 79  | 9.85E-04 |
| cg24979630 | <i>PPP1R12A</i>  | -4.567 | 67  | 95  | 9.86E-04 |
| cg23508540 | <i>CLSTN1</i>    | -4.684 | 96  | 66  | 9.86E-04 |
| cg07833382 | <i>SCPEP1</i>    | -3.008 | 67  | 95  | 9.86E-04 |
| cg10188131 | <i>RPL12</i>     | -5.689 | 100 | 62  | 9.86E-04 |
| cg05284724 | <i>FLJ12571</i>  | -4.834 | 76  | 86  | 9.87E-04 |
| cg20023231 | <i>HS3ST2</i>    | -4.028 | 113 | 49  | 9.88E-04 |
| cg03564506 | <i>TRRAP</i>     | -4.695 | 59  | 103 | 9.89E-04 |

|            |                 |        |     |     |          |
|------------|-----------------|--------|-----|-----|----------|
| cg17267493 | <i>TNFSF13</i>  | 1.877  | 21  | 141 | 9.92E-04 |
| cg05824432 | <i>DCI</i>      | -5.478 | 69  | 93  | 9.92E-04 |
| cg18409845 | <i>43895</i>    | -4.193 | 40  | 122 | 9.92E-04 |
| cg00487159 | <i>SOCS1</i>    | -4.945 | 102 | 60  | 9.94E-04 |
| cg17177829 | <i>ATF5</i>     | -4.844 | 79  | 83  | 9.95E-04 |
| cg13706352 | <i>COX10</i>    | -5.575 | 66  | 96  | 9.95E-04 |
| cg11850311 | <i>ID1</i>      | -4.460 | 76  | 86  | 9.96E-04 |
| cg16621987 | <i>DGCR2</i>    | -3.895 | 80  | 82  | 9.96E-04 |
| cg08090640 | <i>IFI35</i>    | -1.844 | 62  | 100 | 9.96E-04 |
| cg01411954 | <i>NVL</i>      | -4.844 | 60  | 102 | 9.97E-04 |
| cg04451988 | <i>C10orf38</i> | -5.545 | 62  | 100 | 9.97E-04 |
| cg05086993 | <i>NOL9</i>     | -2.914 | 45  | 117 | 9.97E-04 |
| cg15259973 | <i>DSG2</i>     | -3.342 | 69  | 93  | 9.97E-04 |
| cg22437284 | <i>SRC</i>      | 1.945  | 68  | 94  | 9.98E-04 |
| cg24030630 | <i>TCIRG1</i>   | -5.542 | 54  | 108 | 9.99E-04 |
| cg18971054 | <i>MGAM</i>     | 2.227  | 90  | 72  | 9.99E-04 |
| cg22679003 | <i>CDH2</i>     | -4.115 | 91  | 71  | 1.00E-03 |
| cg13057368 | <i>SSB</i>      | -4.356 | 52  | 110 | 1.00E-03 |
| cg17043155 | <i>MRPL19</i>   | -4.851 | 56  | 106 | 1.00E-03 |
| cg26309498 | <i>EDAR</i>     | 2.048  | 90  | 72  | 1.00E-03 |
| cg19288520 | <i>SLC25A32</i> | -5.599 | 55  | 107 | 1.00E-03 |
| cg12963312 | <i>TRAM2</i>    | -6.031 | 67  | 95  | 1.00E-03 |
| cg02169446 | <i>MYO9A</i>    | -5.703 | 73  | 89  | 1.00E-03 |
| cg27665659 | <i>AP1S1</i>    | -3.597 | 49  | 113 | 1.00E-03 |
| cg25835225 | <i>ZNF350</i>   | -5.080 | 106 | 56  | 1.00E-03 |
| cg14572111 | <i>SYT7</i>     | -4.459 | 62  | 100 | 1.01E-03 |
| cg02432101 | <i>TCEB3C</i>   | 2.597  | 60  | 102 | 1.01E-03 |
| cg18001427 | <i>C21orf6</i>  | -4.424 | 126 | 36  | 1.01E-03 |
| cg02007463 | <i>ITGA7</i>    | -4.700 | 60  | 102 | 1.01E-03 |
| cg13894021 | <i>RAB36</i>    | -3.209 | 104 | 58  | 1.01E-03 |
| cg21878918 | <i>LOC56901</i> | -4.550 | 94  | 68  | 1.01E-03 |
| cg24091698 | <i>ERCC4</i>    | -3.999 | 58  | 104 | 1.01E-03 |
| cg26062370 | <i>MGC18079</i> | -4.096 | 99  | 63  | 1.01E-03 |
| cg24166097 | <i>NPM3</i>     | -2.660 | 31  | 131 | 1.01E-03 |
| cg13741249 | <i>ZNF524</i>   | -4.788 | 64  | 98  | 1.01E-03 |
| cg27626318 | <i>VAC14</i>    | -4.447 | 53  | 109 | 1.01E-03 |
| cg01704534 | <i>FLJ20273</i> | -2.476 | 96  | 66  | 1.01E-03 |
| cg25227148 | <i>ZNF271</i>   | -4.865 | 88  | 74  | 1.01E-03 |
| cg05806233 | <i>GNAI1</i>    | -4.313 | 83  | 79  | 1.01E-03 |
| cg08487038 | <i>UHRF2</i>    | -4.805 | 24  | 138 | 1.01E-03 |
| cg24399106 | <i>MGC45800</i> | -3.783 | 67  | 95  | 1.01E-03 |
| cg23530850 | <i>KIAA0182</i> | -5.222 | 79  | 83  | 1.01E-03 |
| cg24478387 | <i>SUMF2</i>    | -2.763 | 58  | 104 | 1.02E-03 |
| cg26770281 | <i>FLJ14768</i> | 3.338  | 71  | 91  | 1.02E-03 |
| cg13021384 | <i>SLC27A2</i>  | -4.417 | 34  | 128 | 1.02E-03 |
| cg00747849 | <i>SLC25A1</i>  | -1.328 | 91  | 71  | 1.02E-03 |
| cg02065795 | <i>KIAA0101</i> | -4.716 | 118 | 44  | 1.02E-03 |
| cg21922731 | <i>HSD17B6</i>  | -1.903 | 99  | 63  | 1.02E-03 |
| cg07315445 | <i>MYL6</i>     | -5.181 | 54  | 108 | 1.02E-03 |
| cg03959219 | <i>TSPYL4</i>   | -4.313 | 67  | 95  | 1.02E-03 |
| cg21404906 | <i>XRCC5</i>    | -3.662 | 147 | 15  | 1.02E-03 |
| cg16619240 | <i>LIMA1</i>    | -5.562 | 62  | 100 | 1.02E-03 |
| cg17891278 | <i>ZNF289</i>   | -5.153 | 40  | 122 | 1.02E-03 |
| cg23983173 | <i>TMEM87A</i>  | -2.712 | 99  | 63  | 1.02E-03 |
| cg05497616 | <i>CAMK4</i>    | -5.283 | 62  | 100 | 1.02E-03 |

|            |          |        |     |     |          |
|------------|----------|--------|-----|-----|----------|
| cg17455591 | 44089    | -4.023 | 84  | 78  | 1.02E-03 |
| cg26993951 | C2orf7   | -3.693 | 102 | 60  | 1.02E-03 |
| cg13904493 | KIAA1804 | -5.705 | 70  | 92  | 1.02E-03 |
| cg23345864 | VPS26    | -4.887 | 70  | 92  | 1.02E-03 |
| cg24682740 | UBP1     | -5.095 | 123 | 39  | 1.02E-03 |
| cg08008403 | LHX9     | -3.604 | 71  | 91  | 1.03E-03 |
| cg02822723 | TRIP13   | -4.926 | 38  | 124 | 1.03E-03 |
| cg21432954 | TRPC4    | -4.190 | 91  | 71  | 1.03E-03 |
| cg27003827 | SFRS9    | -4.267 | 47  | 115 | 1.03E-03 |
| cg14234680 | IMPAD1   | -6.254 | 73  | 89  | 1.03E-03 |
| cg07440877 | FLJ46358 | 3.139  | 62  | 100 | 1.03E-03 |
| cg02937479 | FKBPL    | -3.521 | 41  | 121 | 1.03E-03 |
| cg14645481 | HINT1    | -3.758 | 111 | 51  | 1.03E-03 |
| cg03930970 | ZDHHC4   | 3.073  | 68  | 94  | 1.03E-03 |
| cg09990086 | TACC1    | 2.436  | 87  | 75  | 1.03E-03 |
| cg14181459 | SMAD5    | -5.078 | 70  | 92  | 1.03E-03 |
| cg22727416 | ADAM10   | -4.661 | 105 | 57  | 1.03E-03 |
| cg06403126 | PPP2R2A  | -4.955 | 54  | 108 | 1.03E-03 |
| cg26473272 | SYT8     | 2.282  | 75  | 87  | 1.03E-03 |
| cg07973246 | SRGAP1   | -4.539 | 94  | 68  | 1.03E-03 |
| cg27222589 | K6IRS4   | 2.164  | 21  | 141 | 1.03E-03 |
| cg18758482 | ZBTB8OS  | -0.597 | 97  | 65  | 1.03E-03 |
| cg04455064 | TUFM     | -4.099 | 104 | 58  | 1.03E-03 |
| cg15701622 | MCRS1    | -4.283 | 36  | 126 | 1.03E-03 |
| cg04418771 | COPS4    | -4.534 | 108 | 54  | 1.03E-03 |
| cg12821045 | ZNF573   | -5.373 | 73  | 89  | 1.03E-03 |
| cg11270633 | IL28B    | 0.404  | 84  | 78  | 1.04E-03 |
| cg19969873 | NPPC     | -4.237 | 78  | 84  | 1.04E-03 |
| cg22074858 | GBP3     | -2.445 | 38  | 124 | 1.04E-03 |
| cg22321558 | FLJ90024 | -4.543 | 91  | 71  | 1.04E-03 |
| cg02329886 | HDC      | 2.040  | 41  | 121 | 1.04E-03 |
| cg03225779 | COL27A1  | -2.568 | 74  | 87  | 1.04E-03 |
| cg08711724 | NOC3L    | -4.681 | 113 | 49  | 1.04E-03 |
| cg09065135 | ZA20D1   | -4.938 | 78  | 84  | 1.04E-03 |
| cg23013392 | PARP3    | -4.699 | 59  | 103 | 1.04E-03 |
| cg23780937 | C7orf24  | -5.183 | 67  | 95  | 1.04E-03 |
| cg14747225 | POLR3K   | -3.220 | 90  | 72  | 1.04E-03 |
| cg02154956 | PCCA     | -6.115 | 70  | 92  | 1.04E-03 |
| cg18982568 | KRT1B    | 1.661  | 96  | 66  | 1.04E-03 |
| cg22845362 | ANAPC4   | -5.854 | 46  | 116 | 1.04E-03 |
| cg11832543 | C1orf49  | 3.131  | 78  | 84  | 1.04E-03 |
| cg14982472 | ABCG1    | -2.213 | 62  | 99  | 1.04E-03 |
| cg18482268 | POU4F3   | -3.316 | 83  | 79  | 1.04E-03 |
| cg09845785 | PDE1A    | -2.666 | 90  | 72  | 1.05E-03 |
| cg03922337 | RRAS2    | -2.701 | 117 | 45  | 1.05E-03 |
| cg02688643 | MGST2    | 2.799  | 51  | 111 | 1.05E-03 |
| cg13219107 | LRBA     | -4.635 | 92  | 70  | 1.05E-03 |
| cg17393296 | FLJ10986 | -5.190 | 73  | 89  | 1.05E-03 |
| cg12722998 | FLJ11305 | -4.643 | 87  | 75  | 1.05E-03 |
| cg24638647 | TMEM101  | -4.188 | 61  | 101 | 1.05E-03 |
| cg08210616 | ZNF502   | -3.722 | 58  | 104 | 1.05E-03 |
| cg24158546 | SCAND1   | -4.779 | 111 | 51  | 1.05E-03 |
| cg22490255 | TSPAN31  | -4.911 | 47  | 115 | 1.05E-03 |
| cg11646757 | HIG2     | -5.132 | 119 | 43  | 1.05E-03 |
| cg15876417 | ABCD2    | -2.319 | 68  | 93  | 1.05E-03 |

|            |              |        |     |     |          |
|------------|--------------|--------|-----|-----|----------|
| cg01986577 | ARNTL2       | -2.499 | 91  | 71  | 1.05E-03 |
| cg16011258 | NECAP2       | -4.942 | 76  | 86  | 1.05E-03 |
| cg23357981 | GRP          | -3.336 | 98  | 64  | 1.05E-03 |
| cg13665593 | ZNF435       | -5.976 | 67  | 95  | 1.05E-03 |
| cg04762213 | BAT2         | -3.280 | 39  | 123 | 1.05E-03 |
| cg24613957 | PLA2G2E      | 2.575  | 55  | 107 | 1.05E-03 |
| cg11719452 | BCDIN3       | -4.337 | 108 | 54  | 1.05E-03 |
| cg27056559 | MGMT         | 2.778  | 142 | 20  | 1.05E-03 |
| cg12188538 | FLJ20232     | -5.152 | 110 | 52  | 1.06E-03 |
| cg07309361 | PCBP4        | -5.504 | 47  | 115 | 1.06E-03 |
| cg04529955 | C4orf13      | -5.277 | 66  | 96  | 1.06E-03 |
| cg11263584 | ICT1         | -5.108 | 57  | 105 | 1.06E-03 |
| cg13294439 | TA-PP2C      | -5.016 | 100 | 62  | 1.06E-03 |
| cg18609562 | FLJ32871     | 1.465  | 135 | 27  | 1.06E-03 |
| cg04568580 | PRKRIR       | -0.076 | 49  | 113 | 1.06E-03 |
| cg12318316 | NDUFB2       | -4.069 | 108 | 54  | 1.06E-03 |
| cg00176879 | PTPRA        | 5.671  | 99  | 63  | 1.06E-03 |
| cg14957086 | CSRP2        | -3.723 | 63  | 99  | 1.06E-03 |
| cg11756837 | PRKAB1       | -4.328 | 76  | 86  | 1.06E-03 |
| cg14055374 | MAF          | -5.379 | 45  | 117 | 1.06E-03 |
| cg10154926 | HAP1         | -4.848 | 64  | 98  | 1.06E-03 |
| cg12858460 | EOMES        | -3.759 | 91  | 71  | 1.06E-03 |
| cg23764381 | ATRN1        | -4.255 | 39  | 123 | 1.06E-03 |
| cg19451466 | UHMK1        | -4.425 | 80  | 82  | 1.06E-03 |
| cg17791766 | HSPBP1       | -3.737 | 101 | 61  | 1.07E-03 |
| cg13755070 | FLI1         | -4.000 | 40  | 122 | 1.07E-03 |
| cg22825979 | RFP2         | -5.000 | 82  | 80  | 1.07E-03 |
| cg16787600 | SORCS3       | -3.118 | 82  | 80  | 1.07E-03 |
| cg09099022 | LRRC8B       | 3.607  | 59  | 103 | 1.07E-03 |
| cg18015677 | FLJ12571     | -5.106 | 75  | 87  | 1.07E-03 |
| cg10708675 | NQO1         | -3.704 | 56  | 106 | 1.07E-03 |
| cg11909310 | KFZP686A1012 | -4.445 | 62  | 100 | 1.07E-03 |
| cg24936956 | ZNF600       | -0.260 | 94  | 68  | 1.07E-03 |
| cg10935550 | BTG2         | -5.876 | 66  | 96  | 1.07E-03 |
| cg12727795 | PDGFRB       | -3.968 | 63  | 99  | 1.07E-03 |
| cg16925486 | RPS6         | -4.753 | 90  | 72  | 1.07E-03 |
| cg15676084 | ENAH         | -4.546 | 89  | 73  | 1.07E-03 |
| cg21226861 | COMMD3       | -5.295 | 105 | 57  | 1.07E-03 |
| cg04720358 | RCV1         | 5.187  | 88  | 74  | 1.07E-03 |
| cg12780322 | SRP72        | -4.284 | 43  | 119 | 1.07E-03 |
| cg21223368 | IDH3A        | -5.716 | 98  | 64  | 1.07E-03 |
| cg03793778 | LGALS7       | 0.554  | 103 | 59  | 1.08E-03 |
| cg14727952 | BIRC2        | -4.249 | 61  | 101 | 1.08E-03 |
| cg13921319 | PTMA         | 0.199  | 90  | 72  | 1.08E-03 |
| cg00516481 | PDE9A        | -2.632 | 93  | 69  | 1.08E-03 |
| cg02605634 | WFDC10A      | -3.077 | 103 | 59  | 1.08E-03 |
| cg26333591 | PTPN4        | -4.519 | 37  | 125 | 1.08E-03 |
| cg20352371 | PDZRN4       | 0.987  | 88  | 74  | 1.08E-03 |
| cg24749970 | ALS2CR2      | -5.760 | 65  | 97  | 1.08E-03 |
| cg18533225 | KLHDC7B      | 0.362  | 22  | 140 | 1.08E-03 |
| cg17561452 | LOC161931    | 2.402  | 121 | 41  | 1.08E-03 |
| cg11008571 | CG018        | 1.749  | 73  | 89  | 1.08E-03 |
| cg16000832 | RCBTB2       | -5.626 | 53  | 109 | 1.08E-03 |
| cg21526212 | PTCH         | -5.141 | 75  | 87  | 1.08E-03 |
| cg05200606 | CCND1        | -4.029 | 73  | 89  | 1.08E-03 |

|            |                  |        |     |     |          |
|------------|------------------|--------|-----|-----|----------|
| cg06295404 | <i>SOCS1</i>     | -3.761 | 85  | 77  | 1.08E-03 |
| cg09829319 | <i>GCM2</i>      | -3.515 | 47  | 115 | 1.08E-03 |
| cg03147542 | <i>CBLL1</i>     | -4.624 | 46  | 116 | 1.08E-03 |
| cg27393372 | <i>SCRN3</i>     | -5.475 | 52  | 110 | 1.09E-03 |
| cg24482053 | <i>MLH3</i>      | -4.485 | 44  | 118 | 1.09E-03 |
| cg13759778 | <i>OMG</i>       | 2.141  | 109 | 53  | 1.09E-03 |
| cg17324128 | <i>RASSF4</i>    | -2.826 | 61  | 101 | 1.09E-03 |
| cg01405761 | <i>MGC34646</i>  | -3.168 | 74  | 88  | 1.09E-03 |
| cg22187094 | <i>POLG</i>      | -5.107 | 40  | 122 | 1.09E-03 |
| cg07549630 | <i>NEDD1</i>     | -5.669 | 81  | 81  | 1.09E-03 |
| cg02309594 | <i>HCRTR1</i>    | 1.107  | 69  | 93  | 1.09E-03 |
| cg15738916 | <i>MAP4K4</i>    | -4.630 | 90  | 72  | 1.09E-03 |
| cg18956095 | <i>ZHX1</i>      | -3.843 | 91  | 71  | 1.09E-03 |
| cg09938079 | <i>RHOG</i>      | -4.918 | 111 | 51  | 1.09E-03 |
| cg11516606 | <i>TDRD7</i>     | -4.099 | 50  | 112 | 1.09E-03 |
| cg17756392 | <i>CLPP</i>      | -4.557 | 105 | 57  | 1.09E-03 |
| cg24903376 | <i>STIL</i>      | -3.965 | 65  | 97  | 1.09E-03 |
| cg00327185 | <i>DLAT</i>      | -2.602 | 42  | 120 | 1.09E-03 |
| cg17961200 | <i>CEL</i>       | 3.225  | 48  | 114 | 1.09E-03 |
| cg25098095 | <i>C6orf55</i>   | -4.528 | 117 | 45  | 1.09E-03 |
| cg09429111 | <i>PTPDC1</i>    | -4.035 | 62  | 100 | 1.09E-03 |
| cg11869721 | <i>DREV1</i>     | -5.200 | 36  | 126 | 1.09E-03 |
| cg07084161 | <i>NBN</i>       | -4.392 | 31  | 131 | 1.09E-03 |
| cg06144905 | <i>PIPOX</i>     | -0.877 | 75  | 87  | 1.09E-03 |
| cg19028160 | <i>HDAC4</i>     | -5.757 | 106 | 56  | 1.10E-03 |
| cg10494773 | <i>SRP54</i>     | -2.762 | 43  | 119 | 1.10E-03 |
| cg17839611 | <i>GNGT2</i>     | 0.923  | 67  | 95  | 1.10E-03 |
| cg20656116 | <i>CD59</i>      | -5.398 | 127 | 35  | 1.10E-03 |
| cg11668512 | <i>ZHX3</i>      | 3.338  | 91  | 71  | 1.10E-03 |
| cg13572545 | <i>FBXO30</i>    | -3.259 | 127 | 35  | 1.10E-03 |
| cg20598389 | <i>C6orf89</i>   | -3.338 | 62  | 100 | 1.10E-03 |
| cg00766729 | <i>LOC147808</i> | -5.264 | 47  | 115 | 1.10E-03 |
| cg22062239 | <i>VKORC1</i>    | -5.629 | 55  | 107 | 1.10E-03 |
| cg11059483 | <i>ESR2</i>      | -4.125 | 83  | 79  | 1.10E-03 |
| cg22593785 | <i>C1RL</i>      | -4.825 | 89  | 73  | 1.10E-03 |
| cg23432345 | <i>HOXA7</i>     | -3.907 | 117 | 45  | 1.10E-03 |
| cg07356771 | <i>CHDH</i>      | -4.299 | 84  | 78  | 1.10E-03 |
| cg05554936 | <i>RAB3D</i>     | -5.510 | 63  | 99  | 1.11E-03 |
| cg05650764 | <i>SAPS3</i>     | -5.201 | 118 | 44  | 1.11E-03 |
| cg10198837 | <i>CD8B1</i>     | 3.541  | 130 | 32  | 1.11E-03 |
| cg22646710 | <i>SYT6</i>      | -4.336 | 82  | 80  | 1.11E-03 |
| cg27090024 | <i>CHKA</i>      | -2.473 | 52  | 110 | 1.11E-03 |
| cg23628240 | <i>MLR2</i>      | -4.871 | 84  | 78  | 1.11E-03 |
| cg10996143 | <i>FKBP1A</i>    | -3.440 | 67  | 95  | 1.11E-03 |
| cg24449371 | <i>CIB2</i>      | -5.359 | 76  | 86  | 1.11E-03 |
| cg06532493 | <i>C10orf70</i>  | -4.976 | 95  | 67  | 1.11E-03 |
| cg20925178 | <i>CWF19L1</i>   | -3.734 | 36  | 126 | 1.11E-03 |
| cg00754617 | <i>SPACA4</i>    | 0.587  | 65  | 97  | 1.11E-03 |
| cg01557667 | <i>PACSIN2</i>   | -5.695 | 58  | 104 | 1.11E-03 |
| cg15522719 | <i>GLS</i>       | -5.196 | 63  | 99  | 1.11E-03 |
| cg02068676 | <i>COBRA1</i>    | -5.660 | 52  | 110 | 1.11E-03 |
| cg22668533 | <i>SMC4L1</i>    | -5.041 | 46  | 116 | 1.11E-03 |
| cg05732530 | <i>DUSP2</i>     | -5.933 | 59  | 103 | 1.11E-03 |
| cg20609368 | <i>HBD</i>       | 2.802  | 115 | 47  | 1.11E-03 |
| cg01999787 | <i>ALG5</i>      | -4.371 | 67  | 95  | 1.11E-03 |

|            |                 |        |     |     |          |
|------------|-----------------|--------|-----|-----|----------|
| cg11328875 | <i>PPIL5</i>    | -5.890 | 111 | 51  | 1.11E-03 |
| cg02733650 | <i>XTP3TPA</i>  | -4.201 | 104 | 58  | 1.11E-03 |
| cg15806518 | <i>PSMB7</i>    | -4.444 | 68  | 94  | 1.11E-03 |
| cg20784775 | <i>ARG99</i>    | -2.607 | 118 | 44  | 1.12E-03 |
| cg10396357 | <i>TFAP4</i>    | -4.963 | 77  | 85  | 1.12E-03 |
| cg11618577 | <i>KRTCAP3</i>  | 0.536  | 95  | 67  | 1.12E-03 |
| cg08222514 | <i>SENP6</i>    | -3.301 | 66  | 96  | 1.12E-03 |
| cg17293470 | <i>COQ10B</i>   | -5.636 | 83  | 79  | 1.12E-03 |
| cg08623947 | <i>HCK</i>      | -4.660 | 92  | 70  | 1.12E-03 |
| cg07122495 | <i>MLF1IP</i>   | -5.511 | 103 | 59  | 1.12E-03 |
| cg10948777 | <i>DNM2</i>     | -5.101 | 42  | 120 | 1.12E-03 |
| cg04009666 | <i>POLG2</i>    | -3.931 | 79  | 83  | 1.12E-03 |
| cg16540704 | <i>ASZ1</i>     | 2.819  | 57  | 105 | 1.12E-03 |
| cg04662451 | <i>RAD51</i>    | -4.414 | 37  | 125 | 1.12E-03 |
| cg25631352 | <i>ADD2</i>     | -2.565 | 144 | 18  | 1.13E-03 |
| cg08494812 | <i>TAF1B</i>    | -4.597 | 56  | 106 | 1.13E-03 |
| cg17698643 | <i>C16orf63</i> | -6.122 | 104 | 58  | 1.13E-03 |
| cg27543230 | <i>PPP2CA</i>   | -3.561 | 60  | 102 | 1.13E-03 |
| cg09326546 | <i>RAF1</i>     | -5.049 | 68  | 94  | 1.13E-03 |
| cg04735745 | <i>ZBED3</i>    | -5.391 | 124 | 38  | 1.13E-03 |
| cg03771255 | <i>RPS3A</i>    | -3.117 | 45  | 117 | 1.13E-03 |
| cg01970325 | <i>NELF</i>     | 0.690  | 78  | 84  | 1.13E-03 |
| cg01776246 | <i>COIL</i>     | -4.056 | 83  | 79  | 1.13E-03 |
| cg23652526 | <i>HNRPUL1</i>  | -4.379 | 46  | 116 | 1.13E-03 |
| cg15910079 | <i>RNASE3</i>   | 0.119  | 74  | 88  | 1.13E-03 |
| cg04754011 | <i>GPR44</i>    | -1.864 | 97  | 65  | 1.13E-03 |
| cg16353836 | <i>SAFB</i>     | -5.219 | 106 | 56  | 1.13E-03 |
| cg02241586 | <i>PIP5K3</i>   | -5.364 | 33  | 129 | 1.13E-03 |
| cg03125090 | <i>ARPC5</i>    | -4.544 | 118 | 44  | 1.13E-03 |
| cg06590610 | <i>ZNFN1A1</i>  | 2.866  | 64  | 98  | 1.13E-03 |
| cg06648029 | <i>NR1I2</i>    | 3.357  | 75  | 87  | 1.13E-03 |
| cg11100802 | <i>TRIM52</i>   | -5.422 | 73  | 89  | 1.13E-03 |
| cg17015234 | <i>RABL2A</i>   | -5.426 | 32  | 130 | 1.13E-03 |
| cg03750407 | <i>RAD9A</i>    | -3.545 | 55  | 107 | 1.13E-03 |
| cg03046445 | <i>BHLHB3</i>   | -3.562 | 88  | 74  | 1.13E-03 |
| cg03837750 | <i>LRRC44</i>   | -2.910 | 44  | 118 | 1.13E-03 |
| cg27116713 | <i>GRK6</i>     | -6.809 | 96  | 66  | 1.13E-03 |
| cg15175577 | <i>HSPC117</i>  | -4.983 | 56  | 106 | 1.14E-03 |
| cg04032871 | <i>QPCTL</i>    | -4.971 | 64  | 98  | 1.14E-03 |
| cg17754680 | <i>NPC1L1</i>   | 1.248  | 88  | 74  | 1.14E-03 |
| cg18330203 | <i>TNNT2</i>    | 1.646  | 55  | 107 | 1.14E-03 |
| cg24480859 | <i>SLC2A5</i>   | -1.779 | 97  | 65  | 1.14E-03 |
| cg09877136 | <i>GMFB</i>     | -4.781 | 59  | 103 | 1.14E-03 |
| cg06285340 | <i>CYP11A1</i>  | 2.616  | 68  | 94  | 1.14E-03 |
| cg20225915 | <i>LRDD</i>     | -1.803 | 138 | 24  | 1.14E-03 |
| cg04329069 | <i>AP1B1</i>    | -5.699 | 68  | 94  | 1.14E-03 |
| cg14723014 | <i>ZMYM5</i>    | -4.563 | 69  | 93  | 1.14E-03 |
| cg01729862 | <i>MRPS34</i>   | -4.527 | 74  | 88  | 1.14E-03 |
| cg27460755 | <i>GALNT13</i>  | 1.331  | 120 | 42  | 1.14E-03 |
| cg13882835 | <i>TLK1</i>     | -4.300 | 109 | 53  | 1.14E-03 |
| cg23543604 | <i>TAF12</i>    | -5.039 | 74  | 88  | 1.14E-03 |
| cg18383069 | <i>LOH12CR1</i> | -5.332 | 48  | 114 | 1.15E-03 |
| cg01565918 | <i>GNAS</i>     | 3.329  | 46  | 116 | 1.15E-03 |
| cg22065439 | <i>C5orf15</i>  | -4.889 | 106 | 56  | 1.15E-03 |
| cg10073723 | <i>BMPER</i>    | -5.323 | 40  | 122 | 1.15E-03 |

|            |                  |        |     |     |          |
|------------|------------------|--------|-----|-----|----------|
| cg23441208 | <i>BCAT2</i>     | -5.388 | 75  | 87  | 1.15E-03 |
| cg06043190 | <i>EML4</i>      | -4.866 | 52  | 110 | 1.15E-03 |
| cg15612063 | <i>TMEM45A</i>   | -3.954 | 61  | 101 | 1.15E-03 |
| cg19571071 | <i>GTF3C1</i>    | -3.266 | 106 | 56  | 1.15E-03 |
| cg02239021 | <i>MRPL37</i>    | -4.543 | 43  | 119 | 1.15E-03 |
| cg12056618 | <i>KLF13</i>     | -4.675 | 47  | 115 | 1.15E-03 |
| cg11781389 | <i>LOC89944</i>  | -4.045 | 62  | 100 | 1.15E-03 |
| cg00888561 | <i>WDFY2</i>     | -4.388 | 65  | 97  | 1.15E-03 |
| cg05170326 | <i>OACT5</i>     | -5.500 | 63  | 99  | 1.15E-03 |
| cg10379112 | <i>LOC57146</i>  | -4.711 | 93  | 69  | 1.15E-03 |
| cg20500081 | <i>LRCH4</i>     | 2.011  | 67  | 95  | 1.15E-03 |
| cg11769360 | <i>LRAP</i>      | 2.207  | 140 | 22  | 1.15E-03 |
| cg01108476 | <i>TCP11</i>     | 3.510  | 89  | 73  | 1.15E-03 |
| cg09339301 | <i>QKI</i>       | -4.542 | 46  | 116 | 1.15E-03 |
| cg26361780 | <i>CPB1</i>      | 2.965  | 82  | 80  | 1.16E-03 |
| cg23495059 | <i>RRAGC</i>     | -4.826 | 55  | 107 | 1.16E-03 |
| cg20133313 | <i>CYB5R1</i>    | -4.499 | 55  | 107 | 1.16E-03 |
| cg26502594 | <i>CCDC9</i>     | -4.247 | 99  | 63  | 1.16E-03 |
| cg01029592 | <i>SOX15</i>     | 1.126  | 90  | 72  | 1.16E-03 |
| cg01056155 | <i>BTF3</i>      | -5.196 | 82  | 80  | 1.16E-03 |
| cg01151699 | <i>CACNG2</i>    | -4.387 | 48  | 114 | 1.16E-03 |
| cg11329235 | <i>SRRM1</i>     | -5.446 | 67  | 95  | 1.16E-03 |
| cg23707493 | <i>TNKS2</i>     | -4.614 | 93  | 69  | 1.16E-03 |
| cg27416067 | <i>IL12RB2</i>   | -4.342 | 75  | 87  | 1.16E-03 |
| cg03347966 | <i>FBXL6</i>     | -4.962 | 64  | 98  | 1.16E-03 |
| cg18493147 | <i>C19orf19</i>  | 2.067  | 62  | 100 | 1.16E-03 |
| cg17806989 | <i>RNF17</i>     | 3.988  | 62  | 100 | 1.17E-03 |
| cg21678388 | <i>ZNF354B</i>   | -3.864 | 42  | 120 | 1.17E-03 |
| cg16382256 | <i>EPHB3</i>     | -5.023 | 121 | 41  | 1.17E-03 |
| cg21570818 | <i>FUT5</i>      | 1.927  | 68  | 94  | 1.17E-03 |
| cg02782630 | <i>FLJ13614</i>  | -4.194 | 124 | 38  | 1.17E-03 |
| cg10520594 | <i>NT5C</i>      | -3.444 | 49  | 113 | 1.17E-03 |
| cg08993172 | <i>ALX4</i>      | -3.809 | 114 | 48  | 1.17E-03 |
| cg11692477 | <i>SLC40A1</i>   | -5.203 | 50  | 112 | 1.17E-03 |
| cg07242565 | <i>NR2F6</i>     | -3.844 | 104 | 58  | 1.17E-03 |
| cg24832353 | <i>SMARCC1</i>   | -5.556 | 85  | 77  | 1.17E-03 |
| cg12379145 | <i>PRDM2</i>     | 3.512  | 64  | 98  | 1.17E-03 |
| cg27342122 | <i>PHF20L1</i>   | -4.942 | 66  | 96  | 1.17E-03 |
| cg21795497 | <i>FLJ23554</i>  | -4.023 | 115 | 47  | 1.17E-03 |
| cg03486540 | <i>ZNF224</i>    | -4.880 | 87  | 75  | 1.17E-03 |
| cg12572011 | <i>UBE3A</i>     | -5.328 | 84  | 78  | 1.17E-03 |
| cg07909265 | <i>ITGAV</i>     | -5.373 | 71  | 91  | 1.17E-03 |
| cg13127386 | <i>SLC4A8</i>    | -4.257 | 32  | 130 | 1.17E-03 |
| cg14540297 | <i>LOC339524</i> | -3.851 | 70  | 92  | 1.17E-03 |
| cg21117584 | <i>SNIP1</i>     | -3.303 | 39  | 123 | 1.17E-03 |
| cg05303448 | <i>AACS</i>      | -1.554 | 51  | 110 | 1.18E-03 |
| cg14115004 | <i>STARD3</i>    | -3.579 | 87  | 75  | 1.18E-03 |
| cg07688933 | <i>FLJ20512</i>  | -4.064 | 36  | 126 | 1.18E-03 |
| cg15995002 | <i>RAD54B</i>    | -3.794 | 37  | 125 | 1.18E-03 |
| cg03877802 | <i>PPP5C</i>     | -4.991 | 44  | 118 | 1.18E-03 |
| cg06130787 | <i>KLK10</i>     | -2.579 | 114 | 48  | 1.18E-03 |
| cg06247172 | <i>C6orf1</i>    | -5.417 | 108 | 54  | 1.18E-03 |
| cg08902132 | <i>ETF1</i>      | -5.447 | 90  | 72  | 1.18E-03 |
| cg21491308 | <i>TEX101</i>    | -1.367 | 79  | 83  | 1.18E-03 |
| cg23761196 | <i>CNOT1</i>     | -2.923 | 103 | 59  | 1.18E-03 |

|            |                 |        |     |     |          |
|------------|-----------------|--------|-----|-----|----------|
| cg21339926 | <i>CLMN</i>     | -4.092 | 81  | 81  | 1.18E-03 |
| cg05179880 | <i>PDCD7</i>    | -4.624 | 79  | 83  | 1.18E-03 |
| cg11832727 | <i>RERE</i>     | -4.578 | 69  | 93  | 1.18E-03 |
| cg17742874 | <i>DHPS</i>     | -5.437 | 82  | 80  | 1.18E-03 |
| cg24323434 | <i>SERF2</i>    | -5.238 | 77  | 85  | 1.18E-03 |
| cg14927277 | <i>KIF18A</i>   | -3.828 | 108 | 54  | 1.18E-03 |
| cg25653103 | <i>SEPX1</i>    | -4.252 | 57  | 105 | 1.18E-03 |
| cg26753137 | <i>SIRT5</i>    | -4.320 | 100 | 62  | 1.18E-03 |
| cg04167054 | <i>ATP2C1</i>   | -5.299 | 73  | 89  | 1.18E-03 |
| cg09503975 | <i>SF1</i>      | -4.975 | 47  | 115 | 1.18E-03 |
| cg08818385 | <i>FAHD2A</i>   | -1.163 | 115 | 47  | 1.18E-03 |
| cg17896229 | <i>PROKR2</i>   | 1.558  | 50  | 112 | 1.18E-03 |
| cg18277508 | <i>SLC39A8</i>  | -4.127 | 89  | 73  | 1.18E-03 |
| cg25552889 | <i>C3orf40</i>  | 2.342  | 110 | 52  | 1.18E-03 |
| cg09979256 | <i>RSPO3</i>    | -4.964 | 41  | 121 | 1.18E-03 |
| cg14835962 | <i>THAP7</i>    | -4.335 | 97  | 65  | 1.18E-03 |
| cg17705056 | <i>PQLC1</i>    | -3.563 | 138 | 24  | 1.18E-03 |
| cg02100828 | <i>PSME4</i>    | -5.556 | 53  | 109 | 1.18E-03 |
| cg07446572 | <i>CDCA3</i>    | 1.921  | 91  | 71  | 1.18E-03 |
| cg13927251 | <i>FLT4</i>     | -2.959 | 45  | 117 | 1.18E-03 |
| cg00162643 | <i>DDX58</i>    | -5.230 | 108 | 54  | 1.18E-03 |
| cg18063149 | <i>FMO3</i>     | 2.260  | 62  | 100 | 1.18E-03 |
| cg19679281 | <i>FANCL</i>    | -4.957 | 65  | 97  | 1.18E-03 |
| cg02558133 | <i>PKN2</i>     | -5.942 | 63  | 99  | 1.18E-03 |
| cg26817382 | <i>TMED4</i>    | -5.941 | 73  | 89  | 1.18E-03 |
| cg12288842 | <i>ATPBD4</i>   | -4.327 | 49  | 113 | 1.18E-03 |
| cg23181170 | <i>GABRP</i>    | 1.496  | 113 | 49  | 1.19E-03 |
| cg09594841 | <i>LIG1</i>     | -4.360 | 83  | 79  | 1.19E-03 |
| cg25590938 | <i>GOLGA2</i>   | -3.952 | 61  | 101 | 1.19E-03 |
| cg07634204 | <i>VPS72</i>    | -4.133 | 92  | 70  | 1.19E-03 |
| cg14493899 | <i>TAP2</i>     | 3.097  | 115 | 47  | 1.19E-03 |
| cg03059018 | <i>SIX4</i>     | -3.876 | 92  | 70  | 1.19E-03 |
| cg17164340 | <i>VPS36</i>    | -4.353 | 38  | 124 | 1.19E-03 |
| cg19434066 | <i>ANAPC5</i>   | -5.097 | 76  | 86  | 1.19E-03 |
| cg06790862 | <i>MPPED2</i>   | 2.620  | 78  | 84  | 1.19E-03 |
| cg05678938 | <i>USP13</i>    | -5.017 | 135 | 27  | 1.19E-03 |
| cg19846927 | <i>MRPL44</i>   | -4.826 | 112 | 50  | 1.19E-03 |
| cg15139737 | <i>FBXW5</i>    | -5.155 | 100 | 62  | 1.19E-03 |
| cg22110261 | <i>PGAP1</i>    | -5.003 | 53  | 109 | 1.19E-03 |
| cg09583599 | <i>SKIV2L</i>   | 2.598  | 61  | 101 | 1.19E-03 |
| cg12585282 | <i>PABPC4</i>   | -2.992 | 50  | 112 | 1.19E-03 |
| cg03900542 | <i>DEDD2</i>    | -4.184 | 33  | 129 | 1.19E-03 |
| cg11141561 | <i>CAMLG</i>    | -5.911 | 68  | 94  | 1.19E-03 |
| cg05052633 | <i>CENTA2</i>   | -4.338 | 108 | 54  | 1.19E-03 |
| cg08847533 | <i>NEK9</i>     | -5.331 | 88  | 74  | 1.19E-03 |
| cg09648233 | <i>ALKBH4</i>   | -4.505 | 48  | 114 | 1.20E-03 |
| cg07291563 | <i>GRWD1</i>    | -4.883 | 48  | 114 | 1.20E-03 |
| cg09938681 | <i>ZNF688</i>   | -5.053 | 83  | 79  | 1.20E-03 |
| cg26104204 | <i>MAP3K10</i>  | -4.557 | 34  | 128 | 1.20E-03 |
| cg15428653 | <i>ABCA2</i>    | -3.178 | 76  | 86  | 1.20E-03 |
| cg05938725 | <i>NUAK2</i>    | -5.297 | 48  | 114 | 1.20E-03 |
| cg15301525 | <i>ATP6V0D1</i> | -5.770 | 51  | 111 | 1.20E-03 |
| cg03355298 | <i>B2M</i>      | -6.378 | 82  | 80  | 1.20E-03 |
| cg27291501 | <i>PEMT</i>     | -4.962 | 48  | 114 | 1.20E-03 |
| cg01352882 | <i>STUB1</i>    | -4.985 | 36  | 126 | 1.20E-03 |

|            |                   |        |     |     |          |
|------------|-------------------|--------|-----|-----|----------|
| cg02517489 | <i>UBE3A</i>      | -4.412 | 107 | 55  | 1.20E-03 |
| cg14027234 | <i>CD248</i>      | 0.656  | 71  | 91  | 1.20E-03 |
| cg12188560 | <i>CNTFR</i>      | -2.026 | 65  | 97  | 1.20E-03 |
| cg27494383 | <i>LTK</i>        | -4.515 | 51  | 111 | 1.20E-03 |
| cg00417297 | <i>ZNF619</i>     | -5.765 | 110 | 52  | 1.20E-03 |
| cg25136926 | <i>DDX12</i>      | 1.123  | 109 | 53  | 1.20E-03 |
| cg05286874 | <i>ABCA1</i>      | -5.950 | 76  | 86  | 1.21E-03 |
| cg22286764 | <i>C3orf35</i>    | 1.689  | 112 | 50  | 1.21E-03 |
| cg07952773 | <i>ADPRHL2</i>    | -4.940 | 92  | 70  | 1.21E-03 |
| cg13014406 | <i>RER1</i>       | -4.625 | 98  | 64  | 1.21E-03 |
| cg05116896 | <i>CD2BP2</i>     | -4.991 | 66  | 96  | 1.21E-03 |
| cg26824408 | <i>COG5</i>       | -5.904 | 77  | 85  | 1.21E-03 |
| cg11538128 | <i>ZNF354C</i>    | -5.280 | 96  | 66  | 1.21E-03 |
| cg25239996 | <i>CD40</i>       | -3.191 | 82  | 80  | 1.21E-03 |
| cg16029636 | <i>SLC39A1</i>    | -4.805 | 68  | 94  | 1.21E-03 |
| cg15538820 | <i>OBP2B</i>      | 4.566  | 50  | 112 | 1.21E-03 |
| cg18846362 | <i>CA12</i>       | -4.935 | 68  | 94  | 1.21E-03 |
| cg03782727 | <i>FFAR1</i>      | 3.009  | 76  | 86  | 1.21E-03 |
| cg04141379 | <i>SPATA6</i>     | -5.993 | 101 | 61  | 1.21E-03 |
| cg00061629 | <i>ALX4</i>       | -1.900 | 84  | 78  | 1.21E-03 |
| cg06285486 | <i>SART1</i>      | -3.473 | 63  | 99  | 1.21E-03 |
| cg13372488 | <i>KCNT2</i>      | -3.740 | 72  | 90  | 1.21E-03 |
| cg15559737 | <i>CRYBA4</i>     | 2.116  | 74  | 88  | 1.21E-03 |
| cg22227058 | <i>SLU7</i>       | -4.403 | 25  | 137 | 1.21E-03 |
| cg20116574 | <i>NCOA5</i>      | -4.713 | 91  | 71  | 1.21E-03 |
| cg08999486 | <i>CDC42BPB</i>   | -5.372 | 101 | 61  | 1.21E-03 |
| cg06496078 | <i>C12orf23</i>   | -5.036 | 57  | 105 | 1.21E-03 |
| cg20119871 | <i>ATP10A</i>     | 2.684  | 78  | 84  | 1.21E-03 |
| cg02936872 | <i>CTSL2</i>      | -5.126 | 76  | 86  | 1.22E-03 |
| cg24073051 | <i>CDV3</i>       | -4.762 | 111 | 51  | 1.22E-03 |
| cg01331554 | <i>G3BP2</i>      | -6.436 | 93  | 69  | 1.22E-03 |
| cg03115746 | <i>WHSC1</i>      | 1.582  | 61  | 101 | 1.22E-03 |
| cg12471156 | <i>RBM16</i>      | -5.627 | 51  | 111 | 1.22E-03 |
| cg19638349 | <i>RDH14</i>      | -4.580 | 120 | 42  | 1.22E-03 |
| cg15372098 | <i>C3orf26</i>    | -4.751 | 66  | 96  | 1.22E-03 |
| cg13551243 | <i>ZNF7</i>       | -4.784 | 63  | 99  | 1.22E-03 |
| cg18197795 | <i>GADD45GIP1</i> | -4.822 | 60  | 102 | 1.22E-03 |
| cg04898512 | <i>KLF2</i>       | 2.668  | 75  | 87  | 1.22E-03 |
| cg13983870 | <i>TSPAN12</i>    | -4.454 | 71  | 91  | 1.22E-03 |
| cg12647643 | <i>PTPN13</i>     | -4.190 | 44  | 118 | 1.22E-03 |
| cg25103286 | <i>NT5DC2</i>     | 2.553  | 65  | 97  | 1.22E-03 |
| cg14419187 | <i>C2orf21</i>    | -2.488 | 73  | 89  | 1.22E-03 |
| cg01429321 | <i>LOX</i>        | -4.063 | 71  | 91  | 1.22E-03 |
| cg16332224 | <i>DPM1</i>       | 2.591  | 114 | 48  | 1.22E-03 |
| cg05697231 | <i>PML</i>        | -3.625 | 92  | 70  | 1.22E-03 |
| cg00682653 | <i>VTI1B</i>      | -5.029 | 50  | 112 | 1.22E-03 |
| cg06915165 | <i>GABARAPL1</i>  | -5.039 | 112 | 50  | 1.23E-03 |
| cg10394139 | <i>CRLF3</i>      | -3.638 | 121 | 41  | 1.23E-03 |
| cg03086857 | <i>EDNRB</i>      | -3.165 | 105 | 57  | 1.23E-03 |
| cg20010565 | <i>FLJ37953</i>   | -4.699 | 38  | 124 | 1.23E-03 |
| cg15797414 | <i>HIST1H3B</i>   | -4.304 | 54  | 108 | 1.23E-03 |
| cg19356324 | <i>SLC7A6OS</i>   | 2.070  | 96  | 66  | 1.23E-03 |
| cg26450769 | <i>FAM14B</i>     | -4.736 | 68  | 94  | 1.23E-03 |
| cg11510839 | <i>OCA2</i>       | -4.844 | 35  | 127 | 1.23E-03 |
| cg11151811 | <i>PRKAG1</i>     | -5.318 | 46  | 116 | 1.23E-03 |

|            |           |        |     |     |          |
|------------|-----------|--------|-----|-----|----------|
| cg18759346 | COMMD2    | -4.665 | 120 | 42  | 1.23E-03 |
| cg12149391 | DLG1      | -4.762 | 64  | 98  | 1.23E-03 |
| cg23871659 | TANK      | -1.833 | 35  | 127 | 1.23E-03 |
| cg17391877 | PGC       | 2.141  | 93  | 69  | 1.23E-03 |
| cg09298289 | CENPH     | -4.935 | 85  | 77  | 1.23E-03 |
| cg01466075 | SERP1     | -4.953 | 56  | 106 | 1.23E-03 |
| cg24862483 | CD300LG   | -2.254 | 90  | 72  | 1.23E-03 |
| cg08176609 | POMGNT1   | -5.744 | 58  | 104 | 1.23E-03 |
| cg19564877 | NTN1      | -4.810 | 80  | 82  | 1.24E-03 |
| cg27352992 | CNTN1     | -2.846 | 13  | 149 | 1.24E-03 |
| cg24272559 | LOC116123 | 1.916  | 131 | 31  | 1.24E-03 |
| cg26389232 | PWCR1     | 3.226  | 48  | 114 | 1.24E-03 |
| cg07499372 | USP29     | 4.448  | 51  | 111 | 1.24E-03 |
| cg09429185 | ZNF286    | -3.506 | 120 | 42  | 1.24E-03 |
| cg03770147 | KLF7      | -5.770 | 60  | 102 | 1.24E-03 |
| cg01151686 | LIG3      | -6.097 | 69  | 93  | 1.24E-03 |
| cg21698790 | HRK       | -5.899 | 65  | 97  | 1.24E-03 |
| cg16551261 | LRRC6     | -3.858 | 102 | 60  | 1.24E-03 |
| cg03994908 | RNASEH1   | -5.522 | 63  | 99  | 1.24E-03 |
| cg06297145 | NFXL1     | -4.031 | 69  | 93  | 1.24E-03 |
| cg07112210 | MGAT5B    | -1.193 | 92  | 70  | 1.24E-03 |
| cg22381955 | CHFR      | 5.258  | 48  | 114 | 1.24E-03 |
| cg24789869 | DDX11     | -4.637 | 108 | 54  | 1.24E-03 |
| cg07132517 | POLR2L    | -5.897 | 66  | 96  | 1.24E-03 |
| cg26791905 | PHGDH     | -3.644 | 92  | 70  | 1.25E-03 |
| cg15541315 | REXO2     | -5.109 | 48  | 114 | 1.25E-03 |
| cg19791253 | ATP2B4    | -3.469 | 18  | 144 | 1.25E-03 |
| cg22767079 | BIVM      | -4.973 | 71  | 91  | 1.25E-03 |
| cg09119967 | C20orf103 | -1.444 | 110 | 52  | 1.25E-03 |
| cg12353516 | MAPK7     | -4.359 | 68  | 94  | 1.25E-03 |
| cg19762747 | CRX       | -2.422 | 84  | 78  | 1.25E-03 |
| cg25327247 | SH3GL1    | -3.774 | 99  | 63  | 1.25E-03 |
| cg23035555 | HLRC1     | -4.429 | 65  | 97  | 1.25E-03 |
| cg17067528 | IER3      | -5.338 | 113 | 49  | 1.25E-03 |
| cg20028291 | BCAS4     | -4.910 | 65  | 97  | 1.25E-03 |
| cg07584959 | THRAP5    | -4.090 | 87  | 75  | 1.25E-03 |
| cg08587820 | BHLHB2    | -4.754 | 96  | 66  | 1.25E-03 |
| cg17665193 | GAD2      | -3.839 | 102 | 60  | 1.25E-03 |
| cg18191162 | KIF6      | -4.244 | 64  | 98  | 1.26E-03 |
| cg02683985 | PDGFA     | -4.664 | 82  | 80  | 1.26E-03 |
| cg07290273 | TMEM17    | -4.598 | 43  | 119 | 1.26E-03 |
| cg16063666 | TP53AP1   | -4.102 | 119 | 43  | 1.26E-03 |
| cg12002314 | CHRA1     | -4.223 | 91  | 71  | 1.26E-03 |
| cg16141690 | C14orf119 | -2.935 | 115 | 47  | 1.26E-03 |
| cg03077062 | SFXN5     | -5.147 | 42  | 120 | 1.26E-03 |
| cg03445474 | GPIAP1    | -4.951 | 103 | 59  | 1.26E-03 |
| cg14636377 | RHEBL1    | -5.326 | 62  | 100 | 1.26E-03 |
| cg09345431 | ARFGEF2   | -5.495 | 102 | 60  | 1.26E-03 |
| cg03801144 | PPP6C     | -5.081 | 65  | 97  | 1.27E-03 |
| cg13332088 | C14orf80  | -5.259 | 57  | 105 | 1.27E-03 |
| cg15091410 | IL31RA    | -0.446 | 75  | 73  | 1.27E-03 |
| cg11411707 | MGC29891  | -4.958 | 68  | 94  | 1.27E-03 |
| cg06440646 | SMAD1     | -5.248 | 69  | 93  | 1.27E-03 |
| cg21935292 | GNS       | -5.571 | 92  | 70  | 1.27E-03 |
| cg22950391 | ZNF192    | -5.366 | 105 | 57  | 1.27E-03 |

|            |                 |        |     |     |          |
|------------|-----------------|--------|-----|-----|----------|
| cg07052087 | <i>TPI1</i>     | -5.411 | 78  | 84  | 1.27E-03 |
| cg16175792 | <i>HSD3B1</i>   | 0.169  | 100 | 62  | 1.27E-03 |
| cg04964702 | <i>CBL</i>      | -3.798 | 42  | 120 | 1.27E-03 |
| cg10805667 | <i>FLJ20625</i> | -5.142 | 60  | 102 | 1.27E-03 |
| cg06090864 | <i>FFAR1</i>    | 3.685  | 67  | 95  | 1.27E-03 |
| cg08122545 | <i>HES4</i>     | -4.796 | 81  | 81  | 1.27E-03 |
| cg26023751 | <i>C1orf156</i> | -5.598 | 38  | 124 | 1.27E-03 |
| cg07038887 | <i>BLMH</i>     | -5.623 | 84  | 78  | 1.27E-03 |
| cg12506373 | <i>CAD</i>      | -4.644 | 123 | 39  | 1.27E-03 |
| cg24424381 | <i>PEX11A</i>   | -4.827 | 120 | 42  | 1.27E-03 |
| cg26612644 | <i>KCTD2</i>    | -0.540 | 95  | 65  | 1.27E-03 |
| cg27480700 | <i>ZNF480</i>   | -4.832 | 41  | 121 | 1.27E-03 |
| cg17606881 | <i>ECT2</i>     | -5.071 | 61  | 101 | 1.27E-03 |
| cg25503559 | <i>MRPL24</i>   | -4.603 | 41  | 121 | 1.27E-03 |
| cg05664072 | <i>PER2</i>     | -3.228 | 97  | 65  | 1.27E-03 |
| cg07020962 | <i>MAPRE2</i>   | -4.930 | 80  | 82  | 1.27E-03 |
| cg13518195 | <i>NUDT16</i>   | -5.637 | 86  | 76  | 1.27E-03 |
| cg15569340 | <i>RBP5</i>     | -4.602 | 68  | 94  | 1.28E-03 |
| cg01556075 | <i>MCEMP1</i>   | -3.099 | 92  | 70  | 1.28E-03 |
| cg01985090 | <i>HTF9C</i>    | -6.325 | 89  | 73  | 1.28E-03 |
| cg26001336 | <i>RAB3A</i>    | -5.285 | 105 | 57  | 1.28E-03 |
| cg22721827 | <i>NTN2L</i>    | -0.993 | 73  | 89  | 1.28E-03 |
| cg05024638 | <i>POLG</i>     | -5.813 | 100 | 62  | 1.28E-03 |
| cg09144196 | <i>RBM34</i>    | -4.620 | 91  | 71  | 1.28E-03 |
| cg00006414 | <i>ZNF398</i>   | -4.933 | 112 | 50  | 1.28E-03 |
| cg02021817 | <i>RBL2</i>     | -3.133 | 54  | 108 | 1.28E-03 |
| cg20864636 | <i>GARNL3</i>   | 1.886  | 132 | 30  | 1.28E-03 |
| cg17133388 | <i>C3orf28</i>  | -4.333 | 78  | 84  | 1.28E-03 |
| cg18854045 | <i>FLJ33534</i> | 2.452  | 113 | 49  | 1.29E-03 |
| cg03340261 | <i>HBS1L</i>    | -5.313 | 52  | 110 | 1.29E-03 |
| cg05896682 | <i>GALR1</i>    | -1.870 | 64  | 98  | 1.29E-03 |
| cg04700925 | <i>KIAA0922</i> | -5.243 | 73  | 89  | 1.29E-03 |
| cg22671726 | <i>EGLN2</i>    | -5.350 | 75  | 87  | 1.29E-03 |
| cg13336167 | <i>ZNF579</i>   | -5.289 | 58  | 104 | 1.29E-03 |
| cg23448096 | <i>LYSMD4</i>   | -5.508 | 60  | 102 | 1.29E-03 |
| cg04251363 | <i>ST3GAL6</i>  | -5.590 | 60  | 102 | 1.29E-03 |
| cg17210604 | <i>HIC1</i>     | -4.595 | 63  | 99  | 1.29E-03 |
| cg25470175 | <i>FAM73A</i>   | -4.765 | 59  | 103 | 1.29E-03 |
| cg25140501 | <i>ACIN1</i>    | -4.863 | 118 | 44  | 1.29E-03 |
| cg01827098 | <i>GIMAP7</i>   | 2.418  | 75  | 87  | 1.29E-03 |
| cg22821834 | <i>GPR135</i>   | -5.461 | 101 | 61  | 1.29E-03 |
| cg14343711 | <i>FAF1</i>     | -4.476 | 53  | 109 | 1.29E-03 |
| cg18690395 | <i>CSTF2T</i>   | -6.119 | 85  | 77  | 1.29E-03 |
| cg00620223 | <i>CENPF</i>    | -4.163 | 64  | 98  | 1.29E-03 |
| cg20150565 | <i>ZNFX1</i>    | -2.683 | 60  | 91  | 1.29E-03 |
| cg18801292 | <i>SUPT16H</i>  | -6.037 | 77  | 85  | 1.30E-03 |
| cg20852286 | <i>DHFR1</i>    | -4.228 | 24  | 138 | 1.30E-03 |
| cg01618083 | <i>CRY2</i>     | -5.673 | 115 | 47  | 1.30E-03 |
| cg13114389 | <i>ENTPD7</i>   | -4.511 | 42  | 120 | 1.30E-03 |
| cg12091944 | <i>BARD1</i>    | -2.567 | 47  | 115 | 1.30E-03 |
| cg16761581 | <i>ADCY4</i>    | -4.309 | 113 | 49  | 1.30E-03 |
| cg15467759 | <i>NDST1</i>    | 3.833  | 78  | 84  | 1.30E-03 |
| cg24511869 | <i>RELB</i>     | -4.997 | 43  | 119 | 1.30E-03 |
| cg18964732 | <i>TMCO1</i>    | -3.156 | 68  | 94  | 1.30E-03 |
| cg19029454 | <i>RBPSUH</i>   | -5.410 | 28  | 134 | 1.30E-03 |

|            |                 |        |     |     |          |
|------------|-----------------|--------|-----|-----|----------|
| cg25463428 | <i>TBC1D10B</i> | -5.453 | 51  | 111 | 1.31E-03 |
| cg11811840 | <i>UGT1A1</i>   | 2.105  | 50  | 112 | 1.31E-03 |
| cg11694641 | <i>SLC25A3</i>  | -4.838 | 60  | 102 | 1.31E-03 |
| cg01913908 | <i>ZPLD1</i>    | 1.946  | 63  | 99  | 1.31E-03 |
| cg14879013 | <i>DTWD1</i>    | -5.669 | 117 | 45  | 1.31E-03 |
| cg02569333 | <i>SGK3</i>     | -4.833 | 51  | 111 | 1.31E-03 |
| cg06023257 | <i>GAB2</i>     | -4.244 | 52  | 110 | 1.31E-03 |
| cg25945961 | <i>SET7</i>     | -5.494 | 58  | 104 | 1.31E-03 |
| cg09736922 | <i>THPO</i>     | 1.706  | 75  | 87  | 1.31E-03 |
| cg17260449 | <i>TOPBP1</i>   | -4.080 | 29  | 133 | 1.31E-03 |
| cg01936555 | <i>SLC17A2</i>  | 1.777  | 108 | 54  | 1.31E-03 |
| cg23009046 | <i>PVRL1</i>    | -3.443 | 90  | 72  | 1.31E-03 |
| cg05512756 | <i>UGT3A1</i>   | -1.854 | 83  | 79  | 1.31E-03 |
| cg26891849 | <i>LSM11</i>    | -5.004 | 57  | 105 | 1.31E-03 |
| cg12116020 | <i>PRKACA</i>   | -4.450 | 105 | 57  | 1.31E-03 |
| cg06793062 | <i>CNTNAP4</i>  | 1.847  | 69  | 93  | 1.31E-03 |
| cg25985103 | <i>MAN2C1</i>   | -2.902 | 79  | 83  | 1.31E-03 |
| cg12867068 | <i>CDKL1</i>    | -5.022 | 57  | 105 | 1.32E-03 |
| cg21713812 | <i>KHDRBS1</i>  | -5.921 | 66  | 96  | 1.32E-03 |
| cg01419679 | <i>PTTG1IP</i>  | -4.881 | 61  | 101 | 1.32E-03 |
| cg21472642 | <i>CHN2</i>     | 0.712  | 90  | 72  | 1.32E-03 |
| cg22339278 | <i>KIRREL2</i>  | -3.685 | 91  | 71  | 1.32E-03 |
| cg00696900 | <i>MAT2A</i>    | -5.302 | 113 | 49  | 1.32E-03 |
| cg21742836 | <i>PPP4C</i>    | 0.419  | 57  | 105 | 1.32E-03 |
| cg20991095 | <i>USP49</i>    | -5.783 | 94  | 68  | 1.32E-03 |
| cg10845200 | <i>DRD1IP</i>   | -5.985 | 54  | 108 | 1.32E-03 |
| cg15562197 | <i>C3orf38</i>  | -4.505 | 80  | 82  | 1.32E-03 |
| cg26069252 | <i>EGR1</i>     | -4.816 | 96  | 66  | 1.32E-03 |
| cg04545708 | <i>C11orf1</i>  | -3.772 | 97  | 65  | 1.32E-03 |
| cg22417398 | <i>SCYL1</i>    | -3.541 | 61  | 101 | 1.32E-03 |
| cg18708106 | <i>SUCLA2</i>   | -4.264 | 56  | 106 | 1.33E-03 |
| cg02863842 | <i>PVRL2</i>    | -4.995 | 83  | 79  | 1.33E-03 |
| cg18813928 | <i>RUNX3</i>    | 4.666  | 74  | 88  | 1.33E-03 |
| cg23477967 | <i>TFPI</i>     | -2.883 | 53  | 109 | 1.33E-03 |
| cg15630759 | <i>SF3A1</i>    | -5.797 | 70  | 92  | 1.33E-03 |
| cg17711587 | <i>EIF2S2</i>   | -5.066 | 63  | 99  | 1.33E-03 |
| cg04614339 | <i>CFHR4</i>    | 0.337  | 33  | 129 | 1.33E-03 |
| cg17867194 | <i>SLC30A6</i>  | -4.085 | 52  | 110 | 1.33E-03 |
| cg14473123 | <i>UBE2V2</i>   | -3.922 | 111 | 51  | 1.33E-03 |
| cg15895197 | <i>EMILIN1</i>  | -0.553 | 92  | 70  | 1.33E-03 |
| cg24597988 | <i>SELL</i>     | 1.808  | 96  | 66  | 1.33E-03 |
| cg15470750 | <i>FDPS</i>     | -4.160 | 85  | 77  | 1.33E-03 |
| cg16718891 | <i>ITGA5</i>    | -4.555 | 83  | 79  | 1.33E-03 |
| cg01667384 | <i>FLT3LG</i>   | -5.355 | 46  | 116 | 1.33E-03 |
| cg21419475 | <i>EIF2B1</i>   | -4.755 | 55  | 107 | 1.33E-03 |
| cg10891157 | <i>CRTAP</i>    | -4.891 | 59  | 103 | 1.33E-03 |
| cg18701598 | <i>LIPA</i>     | -4.874 | 60  | 102 | 1.33E-03 |
| cg20545295 | <i>GOLGB1</i>   | -4.354 | 79  | 83  | 1.33E-03 |
| cg27366669 | <i>SH3YL1</i>   | -5.431 | 41  | 121 | 1.33E-03 |
| cg15051063 |                 | 2.656  | 81  | 81  | 1.33E-03 |
| cg24670151 | <i>MRPS7</i>    | -1.315 | 101 | 39  | 1.33E-03 |
| cg16001460 | <i>PRIM2A</i>   | -3.567 | 67  | 95  | 1.34E-03 |
| cg16787352 | <i>ANKRD9</i>   | -1.150 | 125 | 37  | 1.34E-03 |
| cg20655010 | <i>C2orf34</i>  | -5.513 | 49  | 113 | 1.34E-03 |
| cg01182873 | <i>TAS2R3</i>   | 1.755  | 131 | 31  | 1.34E-03 |

|            |                  |        |     |     |          |
|------------|------------------|--------|-----|-----|----------|
| cg22232206 | <i>SRF</i>       | -3.804 | 54  | 108 | 1.34E-03 |
| cg02067021 | <i>DNAJC5B</i>   | 0.974  | 56  | 106 | 1.34E-03 |
| cg01166674 | <i>ABCB8</i>     | -4.734 | 54  | 108 | 1.34E-03 |
| cg08074477 | <i>TNS4</i>      | 0.457  | 65  | 97  | 1.34E-03 |
| cg09499698 | <i>CENPC1</i>    | -4.232 | 45  | 117 | 1.34E-03 |
| cg22341104 | <i>GFI1</i>      | -3.937 | 39  | 123 | 1.34E-03 |
| cg09637363 | <i>CCND1</i>     | 1.039  | 31  | 131 | 1.34E-03 |
| cg18234011 | <i>IGF2BP2</i>   | -5.200 | 63  | 99  | 1.34E-03 |
| cg10294200 | <i>C12orf30</i>  | -4.665 | 102 | 60  | 1.34E-03 |
| cg22063056 | <i>CLCC1</i>     | -5.236 | 60  | 102 | 1.35E-03 |
| cg27056145 | <i>ATG7</i>      | 3.376  | 80  | 82  | 1.35E-03 |
| cg14181391 | <i>CDC91L1</i>   | -5.171 | 82  | 80  | 1.35E-03 |
| cg00054706 | <i>C1D</i>       | -5.199 | 49  | 113 | 1.35E-03 |
| cg15125472 | <i>HSPB6</i>     | -1.923 | 112 | 50  | 1.35E-03 |
| cg00107632 | <i>PGM2</i>      | -5.330 | 82  | 80  | 1.35E-03 |
| cg27294629 | <i>FGFR4</i>     | -3.358 | 111 | 51  | 1.35E-03 |
| cg08792314 | <i>COASY</i>     | -4.939 | 63  | 99  | 1.35E-03 |
| cg24318412 | <i>ASH2L</i>     | -6.001 | 67  | 95  | 1.35E-03 |
| cg08552999 | <i>ZNF644</i>    | -4.459 | 69  | 93  | 1.35E-03 |
| cg02692952 | <i>TRAF6</i>     | -3.236 | 50  | 112 | 1.35E-03 |
| cg01980637 | <i>PER1</i>      | -4.806 | 104 | 58  | 1.35E-03 |
| cg10203523 | <i>MRFAP1L1</i>  | -5.175 | 63  | 99  | 1.35E-03 |
| cg23858074 | <i>C6orf167</i>  | -5.446 | 50  | 112 | 1.35E-03 |
| cg12797788 | <i>NUTF2</i>     | -5.517 | 77  | 85  | 1.36E-03 |
| cg21824902 | <i>WDTX1</i>     | -5.570 | 81  | 81  | 1.36E-03 |
| cg23539753 | <i>SP100</i>     | -4.391 | 111 | 51  | 1.36E-03 |
| cg07230446 | <i>TNRC15</i>    | -3.817 | 90  | 72  | 1.36E-03 |
| cg09009259 | <i>MUM1</i>      | -4.632 | 67  | 95  | 1.36E-03 |
| cg10663973 | <i>MRFAP1</i>    | -4.639 | 38  | 124 | 1.36E-03 |
| cg12802819 | <i>PUS3</i>      | -4.647 | 78  | 84  | 1.36E-03 |
| cg19573464 | <i>KPNB1</i>     | -5.363 | 51  | 111 | 1.36E-03 |
| cg17398003 | <i>FLJ44216</i>  | -5.920 | 80  | 82  | 1.36E-03 |
| cg26610808 | <i>BLOC1S2</i>   | -3.351 | 72  | 90  | 1.36E-03 |
| cg24041977 | <i>CERK</i>      | -5.392 | 80  | 82  | 1.36E-03 |
| cg00832517 | <i>C14orf126</i> | -4.048 | 45  | 117 | 1.36E-03 |
| cg25699533 | <i>UBA52</i>     | -4.988 | 64  | 98  | 1.36E-03 |
| cg01013324 | <i>EFNB3</i>     | -3.983 | 77  | 85  | 1.36E-03 |
| cg07695590 | <i>CEBPZ</i>     | -4.750 | 67  | 95  | 1.36E-03 |
| cg19017420 | <i>ARL2</i>      | -3.824 | 37  | 125 | 1.36E-03 |
| cg21790626 | <i>ZNF154</i>    | -4.176 | 105 | 57  | 1.36E-03 |
| cg24991452 | <i>MAPK14</i>    | -5.532 | 52  | 110 | 1.36E-03 |
| cg25084220 | <i>43893</i>     | -6.125 | 66  | 96  | 1.36E-03 |
| cg18128666 | <i>NCOA1</i>     | 3.147  | 51  | 111 | 1.36E-03 |
| cg22152328 | <i>MX1</i>       | -4.994 | 96  | 66  | 1.36E-03 |
| cg09536738 | <i>EFHD1</i>     | -2.700 | 86  | 76  | 1.36E-03 |
| cg16745616 | <i>ANGPTL4</i>   | -3.211 | 45  | 117 | 1.36E-03 |
| cg21745320 | <i>SMG6</i>      | -3.678 | 50  | 112 | 1.36E-03 |
| cg24239808 | <i>BTDR</i>      | 1.958  | 37  | 125 | 1.36E-03 |
| cg15173196 | <i>UBE2T</i>     | -4.229 | 84  | 78  | 1.36E-03 |
| cg23871933 | <i>Pfs2</i>      | -4.381 | 95  | 67  | 1.37E-03 |
| cg02693857 | <i>MXD3</i>      | -4.668 | 72  | 90  | 1.37E-03 |
| cg23484278 | <i>C15orf27</i>  | -4.110 | 83  | 79  | 1.37E-03 |
| cg23570261 | <i>FLJ10006</i>  | -5.001 | 67  | 95  | 1.37E-03 |
| cg20379125 | <i>NOV</i>       | -5.618 | 91  | 71  | 1.37E-03 |
| cg19102858 | <i>COPS8</i>     | -4.124 | 68  | 94  | 1.37E-03 |

|            |                  |        |     |     |          |
|------------|------------------|--------|-----|-----|----------|
| cg08271519 | <i>TM9SF2</i>    | -3.926 | 69  | 93  | 1.37E-03 |
| cg16598810 | <i>DEPDC1</i>    | -4.523 | 76  | 86  | 1.37E-03 |
| cg14312526 | <i>FOXL2</i>     | -3.039 | 94  | 68  | 1.37E-03 |
| cg21024391 | <i>GLMN</i>      | -4.858 | 70  | 92  | 1.37E-03 |
| cg17173856 | <i>GRM5</i>      | 0.970  | 132 | 23  | 1.37E-03 |
| cg00146096 | <i>FANCF</i>     | -5.496 | 32  | 130 | 1.37E-03 |
| cg22492966 | <i>JMJD1C</i>    | -3.501 | 97  | 65  | 1.37E-03 |
| cg20780953 | <i>RAB3D</i>     | -4.049 | 53  | 109 | 1.37E-03 |
| cg16721845 | <i>MTL5</i>      | -5.054 | 105 | 57  | 1.37E-03 |
| cg23983366 | <i>RANBP6</i>    | -1.812 | 25  | 137 | 1.37E-03 |
| cg01130192 | <i>ACO1</i>      | -3.737 | 99  | 63  | 1.37E-03 |
| cg02620769 | <i>CCDC65</i>    | -4.352 | 122 | 40  | 1.37E-03 |
| cg08440125 | <i>HIBADH</i>    | -4.795 | 96  | 66  | 1.37E-03 |
| cg14839932 | <i>SRF</i>       | -3.087 | 93  | 69  | 1.37E-03 |
| cg23830037 | <i>DRG2</i>      | -4.873 | 58  | 104 | 1.37E-03 |
| cg05395995 | <i>LOC221143</i> | -4.772 | 45  | 117 | 1.37E-03 |
| cg18360149 | <i>ZNF79</i>     | -5.281 | 73  | 89  | 1.37E-03 |
| cg20856436 | <i>RPS27A</i>    | -4.962 | 98  | 64  | 1.37E-03 |
| cg26130726 | <i>CYB5R4</i>    | -4.374 | 67  | 95  | 1.37E-03 |
| cg08802167 | <i>NPC2</i>      | -5.314 | 83  | 79  | 1.38E-03 |
| cg19776453 | <i>CEACAM1</i>   | 1.783  | 92  | 70  | 1.38E-03 |
| cg24743310 | <i>FLJ31196</i>  | 2.757  | 142 | 20  | 1.38E-03 |
| cg16862838 | <i>RCN2</i>      | -4.241 | 73  | 89  | 1.38E-03 |
| cg02787991 | <i>SECTM1</i>    | -5.148 | 101 | 61  | 1.38E-03 |
| cg02929869 | <i>PFN2</i>      | -5.836 | 48  | 114 | 1.38E-03 |
| cg08983259 | <i>INSL5</i>     | 3.120  | 118 | 44  | 1.38E-03 |
| cg11009596 | <i>AURKB</i>     | -5.311 | 74  | 88  | 1.38E-03 |
| cg14108384 | <i>TMCO1</i>     | -4.482 | 87  | 75  | 1.38E-03 |
| cg04972545 | <i>RFX3</i>      | -4.274 | 57  | 105 | 1.38E-03 |
| cg07197823 | <i>INHBB</i>     | -3.978 | 137 | 25  | 1.38E-03 |
| cg06777715 | <i>ATG10</i>     | -4.769 | 123 | 39  | 1.38E-03 |
| cg02978542 | <i>MTHFR</i>     | -5.060 | 45  | 117 | 1.38E-03 |
| cg25065147 | <i>MCFD2</i>     | -4.177 | 128 | 34  | 1.38E-03 |
| cg08866753 | <i>PABPC4</i>    | -5.543 | 48  | 114 | 1.38E-03 |
| cg04715462 | <i>H19</i>       | 1.588  | 134 | 28  | 1.39E-03 |
| cg13769204 | <i>GALNT2</i>    | -4.643 | 93  | 69  | 1.39E-03 |
| cg12402495 | <i>C1orf43</i>   | -6.091 | 106 | 56  | 1.39E-03 |
| cg18453621 | <i>LMX1B</i>     | -4.445 | 61  | 101 | 1.39E-03 |
| cg12099032 | <i>TXNDC3</i>    | 4.808  | 144 | 18  | 1.39E-03 |
| cg26516764 | <i>APRIN</i>     | -4.770 | 73  | 89  | 1.39E-03 |
| cg12968903 | <i>FLJ32028</i>  | 1.906  | 66  | 96  | 1.39E-03 |
| cg12066181 | <i>DNMT3A</i>    | -4.572 | 49  | 113 | 1.39E-03 |
| cg14601560 | <i>SCLY</i>      | -3.361 | 76  | 86  | 1.39E-03 |
| cg18630855 | <i>CEBPZ</i>     | -5.615 | 38  | 124 | 1.39E-03 |
| cg07361385 | <i>AHSG</i>      | 2.274  | 67  | 95  | 1.39E-03 |
| cg03848145 | <i>C1orf52</i>   | -4.188 | 48  | 114 | 1.39E-03 |
| cg21925493 | <i>C9orf89</i>   | -5.217 | 93  | 69  | 1.39E-03 |
| cg25047001 | <i>GRIN2A</i>    | -4.983 | 84  | 78  | 1.40E-03 |
| cg23366119 | <i>CNDP2</i>     | -4.258 | 51  | 111 | 1.40E-03 |
| cg27056119 | <i>SERPINB1</i>  | -5.174 | 108 | 54  | 1.40E-03 |
| cg26323655 | <i>FSBP</i>      | 0.767  | 67  | 95  | 1.40E-03 |
| cg27321931 | <i>DSP</i>       | -4.118 | 66  | 96  | 1.40E-03 |
| cg23159296 | <i>SREBF1</i>    | -5.918 | 60  | 102 | 1.40E-03 |
| cg05516832 | <i>SGTA</i>      | -4.542 | 50  | 112 | 1.40E-03 |
| cg10057218 | <i>GSDML</i>     | 2.595  | 60  | 102 | 1.40E-03 |

|            |                  |        |     |     |          |
|------------|------------------|--------|-----|-----|----------|
| cg14297700 | <i>TBL3</i>      | -5.803 | 99  | 63  | 1.40E-03 |
| cg18694780 | <i>CMKOR1</i>    | -3.923 | 122 | 40  | 1.40E-03 |
| cg08132767 | <i>ARL1</i>      | -4.789 | 104 | 58  | 1.40E-03 |
| cg25163134 | <i>PSMC4</i>     | -3.190 | 97  | 65  | 1.40E-03 |
| cg01485998 | <i>FLJ12505</i>  | -5.131 | 114 | 48  | 1.40E-03 |
| cg19327844 | <i>APBB1</i>     | -5.501 | 87  | 75  | 1.40E-03 |
| cg16625125 | <i>NUDT8</i>     | -4.944 | 57  | 105 | 1.41E-03 |
| cg18244915 | <i>ZNF569</i>    | -3.461 | 43  | 119 | 1.41E-03 |
| cg26315802 | <i>TAPBP</i>     | -3.099 | 89  | 73  | 1.41E-03 |
| cg23687186 | <i>IPO9</i>      | -3.715 | 46  | 116 | 1.41E-03 |
| cg06277277 | <i>NR1I3</i>     | 1.595  | 68  | 94  | 1.41E-03 |
| cg16757724 | <i>RBPSUHL</i>   | 1.871  | 80  | 82  | 1.41E-03 |
| cg12468056 | <i>MYST3</i>     | -5.219 | 104 | 58  | 1.41E-03 |
| cg16477324 | <i>ADCK4</i>     | -4.460 | 55  | 107 | 1.41E-03 |
| cg00629585 | <i>GFI1B</i>     | -2.145 | 83  | 78  | 1.41E-03 |
| cg25112853 | <i>HSC20</i>     | 0.259  | 89  | 73  | 1.41E-03 |
| cg27094076 | <i>ZBPB</i>      | -3.517 | 99  | 63  | 1.41E-03 |
| cg15780888 | <i>PRKCABP</i>   | -3.695 | 112 | 50  | 1.41E-03 |
| cg09010998 | <i>TCF8</i>      | -4.532 | 72  | 90  | 1.41E-03 |
| cg18270343 | <i>JRK</i>       | 0.723  | 58  | 104 | 1.41E-03 |
| cg00162401 | <i>GSTA4</i>     | -4.611 | 58  | 104 | 1.41E-03 |
| cg01758870 | <i>MGC72075</i>  | 0.407  | 73  | 89  | 1.41E-03 |
| cg15627025 | <i>KIR3DL1</i>   | 2.376  | 118 | 44  | 1.42E-03 |
| cg17638137 | <i>TCERG1</i>    | -4.913 | 73  | 89  | 1.42E-03 |
| cg04117338 | <i>CRADD</i>     | -5.134 | 45  | 117 | 1.42E-03 |
| cg08772206 | <i>SH2D4B</i>    | 2.174  | 98  | 64  | 1.42E-03 |
| cg07000551 | <i>BMF</i>       | -5.396 | 46  | 116 | 1.42E-03 |
| cg26778908 | <i>PRPF18</i>    | -4.108 | 91  | 71  | 1.42E-03 |
| cg18275051 | <i>CYB5R1</i>    | -2.796 | 64  | 98  | 1.42E-03 |
| cg01888566 | <i>MEST</i>      | -0.481 | 62  | 100 | 1.42E-03 |
| cg21287330 | <i>C17orf81</i>  | -4.332 | 54  | 108 | 1.42E-03 |
| cg01037108 | <i>HSPA9B</i>    | -4.479 | 67  | 95  | 1.42E-03 |
| cg12799265 | <i>C1orf50</i>   | -3.104 | 60  | 102 | 1.42E-03 |
| cg03221676 | <i>ZCCHC6</i>    | -5.420 | 93  | 69  | 1.42E-03 |
| cg17823175 | <i>AZU1</i>      | 1.579  | 119 | 43  | 1.42E-03 |
| cg06146910 | <i>KBTBD6</i>    | -5.958 | 98  | 64  | 1.42E-03 |
| cg15031780 | <i>PEX14</i>     | -5.462 | 109 | 53  | 1.43E-03 |
| cg10313675 | <i>C1orf74</i>   | -5.985 | 88  | 74  | 1.43E-03 |
| cg00002426 | <i>SLMAP</i>     | -0.051 | 47  | 115 | 1.43E-03 |
| cg08794192 | <i>SPATA2</i>    | -5.821 | 46  | 116 | 1.43E-03 |
| cg27520502 | <i>C17orf32</i>  | -4.737 | 97  | 65  | 1.43E-03 |
| cg11049298 | <i>HNRPA0</i>    | -4.564 | 85  | 77  | 1.43E-03 |
| cg02899723 | <i>DDX4</i>      | 4.319  | 82  | 80  | 1.43E-03 |
| cg18283554 | <i>U1SNRNPBP</i> | -3.654 | 32  | 130 | 1.43E-03 |
| cg02940164 | <i>FRAG1</i>     | -4.571 | 90  | 72  | 1.43E-03 |
| cg17189058 | <i>FLJ20558</i>  | -5.934 | 60  | 102 | 1.43E-03 |
| cg27579745 | <i>LDB1</i>      | -4.551 | 31  | 131 | 1.43E-03 |
| cg08419026 | <i>SLCO5A1</i>   | -4.794 | 39  | 123 | 1.43E-03 |
| cg10298205 | <i>NAPRT1</i>    | 3.412  | 49  | 113 | 1.43E-03 |
| cg26246296 | <i>TXN</i>       | -5.475 | 78  | 84  | 1.43E-03 |
| cg16907075 | <i>UBQLN4</i>    | -2.923 | 55  | 107 | 1.43E-03 |
| cg19815904 | <i>SEMA3C</i>    | -2.890 | 81  | 81  | 1.43E-03 |
| cg22699062 | <i>HSP90B1</i>   | -4.218 | 79  | 83  | 1.43E-03 |
| cg05698090 | <i>CERK</i>      | -3.357 | 67  | 95  | 1.44E-03 |
| cg17414431 | <i>PPFIA3</i>    | -4.297 | 47  | 115 | 1.44E-03 |

|            |                  |        |     |     |          |
|------------|------------------|--------|-----|-----|----------|
| cg18825539 | <i>ATP2A2</i>    | -5.286 | 84  | 78  | 1.44E-03 |
| cg11933375 | <i>FLJ10815</i>  | -4.255 | 52  | 110 | 1.44E-03 |
| cg17199658 | <i>MGC39715</i>  | -0.810 | 85  | 77  | 1.44E-03 |
| cg20370277 | <i>NCKIPSD</i>   | -3.351 | 113 | 49  | 1.44E-03 |
| cg05521696 | <i>SLC2A14</i>   | -2.881 | 130 | 32  | 1.44E-03 |
| cg13719194 | <i>PAFAH1B1</i>  | -3.227 | 98  | 64  | 1.44E-03 |
| cg15091337 | <i>POLE4</i>     | -4.170 | 64  | 98  | 1.44E-03 |
| cg14292823 | <i>TIGD5</i>     | 0.437  | 57  | 105 | 1.44E-03 |
| cg18772361 | <i>C1orf22</i>   | -5.430 | 52  | 110 | 1.44E-03 |
| cg00003994 | <i>MEOX2</i>     | -3.875 | 85  | 77  | 1.44E-03 |
| cg09068993 | <i>C1orf4</i>    | -4.088 | 68  | 94  | 1.44E-03 |
| cg04317031 | <i>FAM73B</i>    | -3.194 | 60  | 102 | 1.44E-03 |
| cg21705120 | <i>UBE2G1</i>    | -4.074 | 62  | 100 | 1.44E-03 |
| cg05341670 | <i>C1orf83</i>   | -5.632 | 60  | 102 | 1.44E-03 |
| cg22667787 | <i>APTX</i>      | -5.476 | 62  | 100 | 1.44E-03 |
| cg07639720 | <i>BNC1</i>      | -3.899 | 101 | 61  | 1.44E-03 |
| cg18182358 | <i>ST3GAL6</i>   | -3.591 | 95  | 67  | 1.44E-03 |
| cg09088508 | <i>RHOF</i>      | -4.872 | 48  | 114 | 1.45E-03 |
| cg08024766 | <i>PSCD1</i>     | -3.570 | 105 | 57  | 1.45E-03 |
| cg25398949 | <i>RPS6KA5</i>   | -4.714 | 67  | 95  | 1.45E-03 |
| cg16415058 | <i>SORCS1</i>    | -2.275 | 93  | 69  | 1.45E-03 |
| cg19155599 | <i>PTGS2</i>     | -2.605 | 72  | 90  | 1.45E-03 |
| cg10441365 | <i>SAR1B</i>     | -5.435 | 84  | 78  | 1.45E-03 |
| cg24034289 | <i>SCAMP3</i>    | -3.603 | 122 | 39  | 1.45E-03 |
| cg25938646 | <i>SLITRK1</i>   | -3.595 | 108 | 54  | 1.45E-03 |
| cg02956481 | <i>LOC148137</i> | -5.310 | 53  | 109 | 1.45E-03 |
| cg00884221 | <i>IGFBP7</i>    | -3.857 | 50  | 112 | 1.46E-03 |
| cg16340918 | <i>KIF11</i>     | -5.822 | 87  | 75  | 1.46E-03 |
| cg09667122 | <i>GTF2IRD2</i>  | -3.740 | 78  | 84  | 1.46E-03 |
| cg10277781 | <i>CNIH</i>      | -5.693 | 69  | 93  | 1.46E-03 |
| cg04894993 | <i>KIAA0265</i>  | -4.718 | 58  | 104 | 1.46E-03 |
| cg19637116 | <i>FNTB</i>      | -3.873 | 53  | 109 | 1.46E-03 |
| cg06110365 | <i>TTLL12</i>    | -4.883 | 119 | 43  | 1.46E-03 |
| cg27289104 | <i>SDCCAG1</i>   | -4.856 | 115 | 47  | 1.46E-03 |
| cg11277126 | <i>TRPC4AP</i>   | -2.341 | 51  | 111 | 1.46E-03 |
| cg09945801 | <i>WRN</i>       | -1.121 | 42  | 120 | 1.46E-03 |
| cg18937321 | <i>SLC6A9</i>    | -4.627 | 51  | 111 | 1.46E-03 |
| cg25785378 | <i>PCQAP</i>     | -4.564 | 70  | 92  | 1.47E-03 |
| cg14609458 | <i>PRRG4</i>     | -5.261 | 74  | 88  | 1.47E-03 |
| cg19837131 | <i>PIK3C3</i>    | -3.965 | 47  | 115 | 1.47E-03 |
| cg12907644 | <i>SAA2</i>      | 0.159  | 125 | 37  | 1.47E-03 |
| cg06222800 | <i>KRTAP21-1</i> | 2.028  | 53  | 109 | 1.47E-03 |
| cg14448145 | <i>DNAJC5</i>    | -0.873 | 76  | 86  | 1.47E-03 |
| cg17135325 | <i>NMD3</i>      | -4.322 | 57  | 105 | 1.47E-03 |
| cg17969298 | <i>ANGEL2</i>    | -4.166 | 44  | 118 | 1.47E-03 |
| cg19362572 | <i>SHC4</i>      | -3.359 | 127 | 34  | 1.47E-03 |
| cg11375475 | <i>BBC3</i>      | -5.074 | 81  | 81  | 1.47E-03 |
| cg21229859 | <i>MYEF2</i>     | -3.998 | 79  | 83  | 1.47E-03 |
| cg12840719 | <i>CDKN2A</i>    | -2.689 | 100 | 62  | 1.48E-03 |
| cg22318304 | <i>SPA17</i>     | -2.303 | 44  | 118 | 1.48E-03 |
| cg10878998 | <i>CYB5A</i>     | -3.858 | 76  | 86  | 1.48E-03 |
| cg07851243 | <i>MXRA7</i>     | -4.682 | 78  | 84  | 1.48E-03 |
| cg14119774 | <i>WDR41</i>     | -4.801 | 78  | 84  | 1.48E-03 |
| cg12041387 | <i>DLX5</i>      | -1.430 | 105 | 57  | 1.48E-03 |
| cg19764407 | <i>CDKN2B</i>    | -4.512 | 78  | 84  | 1.48E-03 |

|            |                 |        |     |     |          |
|------------|-----------------|--------|-----|-----|----------|
| cg07873488 | <i>MUC17</i>    | 2.192  | 118 | 44  | 1.48E-03 |
| cg21332946 | <i>LIX1L</i>    | -5.843 | 75  | 87  | 1.48E-03 |
| cg22983092 | <i>KRT25A</i>   | 2.312  | 119 | 43  | 1.48E-03 |
| cg10537269 | <i>TIMM9</i>    | -1.311 | 79  | 83  | 1.48E-03 |
| cg23362667 | <i>RIPK5</i>    | -2.703 | 51  | 111 | 1.48E-03 |
| cg15872103 | <i>SLC35F5</i>  | -4.972 | 79  | 83  | 1.48E-03 |
| cg24883732 | <i>TCEB3B</i>   | 3.905  | 79  | 83  | 1.48E-03 |
| cg04278702 | <i>HTR1E</i>    | -3.634 | 68  | 94  | 1.48E-03 |
| cg15854296 | <i>MAP3K11</i>  | -4.594 | 120 | 42  | 1.48E-03 |
| cg09473585 | <i>C3orf14</i>  | 2.064  | 54  | 108 | 1.48E-03 |
| cg01135200 | <i>STXBP5</i>   | -4.521 | 46  | 116 | 1.49E-03 |
| cg19328294 | <i>PRSS22</i>   | -2.217 | 36  | 126 | 1.49E-03 |
| cg01620308 | <i>PRNP</i>     | -4.316 | 33  | 129 | 1.49E-03 |
| cg19982860 | <i>IFNA21</i>   | 1.696  | 73  | 89  | 1.49E-03 |
| cg12729048 | <i>TUFT1</i>    | -4.397 | 36  | 126 | 1.49E-03 |
| cg09888137 | <i>ACTR1A</i>   | -5.008 | 55  | 107 | 1.49E-03 |
| cg05642698 | <i>SEC63</i>    | -5.379 | 67  | 95  | 1.49E-03 |
| cg16628119 | <i>ITPK1</i>    | -4.558 | 79  | 83  | 1.49E-03 |
| cg16778809 | <i>ADAM23</i>   | -4.406 | 101 | 61  | 1.49E-03 |
| cg06650260 | <i>NR0B2</i>    | 1.314  | 16  | 146 | 1.49E-03 |
| cg02518671 | <i>SIRT6</i>    | -4.265 | 30  | 132 | 1.49E-03 |
| cg10165198 | <i>PCCB</i>     | -5.555 | 51  | 111 | 1.49E-03 |
| cg19110355 | <i>WWP2</i>     | -4.103 | 37  | 125 | 1.49E-03 |
| cg07827038 | <i>MRP63</i>    | -5.470 | 105 | 57  | 1.49E-03 |
| cg03384938 | <i>CXXC4</i>    | -5.089 | 82  | 80  | 1.49E-03 |
| cg11175476 | <i>LRP6</i>     | -2.142 | 67  | 95  | 1.49E-03 |
| cg22536398 | <i>NTN2L</i>    | -4.376 | 98  | 64  | 1.49E-03 |
| cg25738273 | <i>DUSP26</i>   | -4.492 | 113 | 49  | 1.49E-03 |
| cg25912717 | <i>THBS3</i>    | -3.417 | 73  | 89  | 1.49E-03 |
| cg21087137 | <i>MGC26856</i> | -4.257 | 98  | 64  | 1.50E-03 |
| cg22117143 | <i>MPDZ</i>     | 2.963  | 64  | 98  | 1.50E-03 |
| cg22572779 | <i>MGC40222</i> | 1.654  | 89  | 73  | 1.50E-03 |
| cg19774491 | <i>PROS1</i>    | -4.539 | 85  | 77  | 1.50E-03 |
| cg20712430 | <i>KREMEN2</i>  | -4.559 | 81  | 81  | 1.50E-03 |
| cg00687686 | <i>NDRG4</i>    | -4.503 | 47  | 115 | 1.50E-03 |
| cg27264345 | <i>REEP2</i>    | -4.082 | 47  | 115 | 1.50E-03 |
| cg23888423 | <i>44076</i>    | -4.689 | 53  | 109 | 1.50E-03 |
| cg10098888 | <i>IRS1</i>     | -3.774 | 90  | 72  | 1.50E-03 |
| cg21639968 | <i>UBE2M</i>    | -6.103 | 72  | 90  | 1.50E-03 |
| cg23735442 | <i>SMG7</i>     | -4.588 | 51  | 111 | 1.50E-03 |
| cg12054421 | <i>PASK</i>     | -4.382 | 31  | 131 | 1.50E-03 |
| cg01926595 | <i>PFN1</i>     | -3.449 | 135 | 27  | 1.50E-03 |
| cg16547450 | <i>TTC10</i>    | -4.626 | 96  | 66  | 1.50E-03 |
| cg26605086 | <i>CCNE1</i>    | -5.035 | 75  | 87  | 1.50E-03 |
| cg01442799 | <i>YAP1</i>     | -4.620 | 58  | 104 | 1.50E-03 |
| cg04880762 | <i>VAMP1</i>    | -5.235 | 50  | 112 | 1.50E-03 |
| cg20967220 | <i>GCM1</i>     | 1.751  | 90  | 72  | 1.50E-03 |
| cg20684399 | <i>PHF2</i>     | -4.337 | 56  | 106 | 1.51E-03 |
| cg09881917 | <i>FUK</i>      | -3.802 | 37  | 125 | 1.51E-03 |
| cg25817752 | <i>PDIK1L</i>   | -4.728 | 66  | 96  | 1.51E-03 |
| cg19329389 | <i>TRIP4</i>    | -3.605 | 87  | 75  | 1.51E-03 |
| cg07048351 | <i>SERP1</i>    | -5.272 | 47  | 115 | 1.51E-03 |
| cg27341860 | <i>OR2L13</i>   | 2.730  | 89  | 73  | 1.51E-03 |
| cg05009249 | <i>ATAD3A</i>   | -5.138 | 108 | 54  | 1.51E-03 |
| cg15219393 | <i>PPARGC1B</i> | -3.190 | 43  | 119 | 1.51E-03 |

|            |                 |        |     |     |          |
|------------|-----------------|--------|-----|-----|----------|
| cg03605339 | <i>ARMC7</i>    | -4.296 | 95  | 67  | 1.51E-03 |
| cg26781886 | <i>EMB</i>      | -3.744 | 97  | 65  | 1.51E-03 |
| cg00324733 | <i>NUCB2</i>    | -4.809 | 64  | 98  | 1.51E-03 |
| cg21530453 | <i>GNAO1</i>    | -4.410 | 72  | 90  | 1.51E-03 |
| cg18695917 | <i>FSTL5</i>    | -4.464 | 80  | 82  | 1.52E-03 |
| cg02443089 | <i>RPS29</i>    | -4.072 | 95  | 66  | 1.52E-03 |
| cg15383087 | <i>ZNF545</i>   | 0.197  | 14  | 148 | 1.52E-03 |
| cg13671818 | <i>RUNDC2A</i>  | -5.199 | 45  | 117 | 1.52E-03 |
| cg20259534 | <i>BUB1B</i>    | -4.758 | 40  | 122 | 1.52E-03 |
| cg23815845 | <i>ARHGEF5</i>  | -4.153 | 77  | 85  | 1.52E-03 |
| cg09597496 | <i>NISCH</i>    | -4.791 | 77  | 85  | 1.52E-03 |
| cg26491213 | <i>SIX3</i>     | -3.884 | 65  | 97  | 1.52E-03 |
| cg06489804 | <i>FBXW9</i>    | -5.167 | 63  | 99  | 1.52E-03 |
| cg19217872 | <i>ZNF187</i>   | -3.479 | 75  | 87  | 1.52E-03 |
| cg20972553 | <i>JDP2</i>     | 3.381  | 111 | 51  | 1.52E-03 |
| cg22401066 | <i>SMPDL3A</i>  | -4.493 | 92  | 70  | 1.52E-03 |
| cg26637901 | <i>ATF7IP</i>   | -4.714 | 37  | 125 | 1.52E-03 |
| cg16295988 | <i>C9orf80</i>  | -4.885 | 80  | 82  | 1.52E-03 |
| cg09809950 | <i>MRPL39</i>   | -6.015 | 88  | 74  | 1.52E-03 |
| cg06154597 | <i>MGC4618</i>  | 0.603  | 56  | 106 | 1.53E-03 |
| cg22305782 | <i>FBXL19</i>   | 4.010  | 69  | 93  | 1.53E-03 |
| cg22474507 | <i>CINP</i>     | -5.147 | 72  | 90  | 1.53E-03 |
| cg20429911 | <i>LDHA</i>     | -4.111 | 57  | 105 | 1.53E-03 |
| cg03312426 | <i>RRAS</i>     | -4.524 | 95  | 67  | 1.53E-03 |
| cg09107315 | <i>GIPC2</i>    | -1.210 | 66  | 96  | 1.53E-03 |
| cg06855803 | <i>ICAM3</i>    | -0.632 | 60  | 102 | 1.53E-03 |
| cg19073614 | <i>TBC1D17</i>  | -5.191 | 83  | 79  | 1.53E-03 |
| cg11044823 | <i>PPWD1</i>    | -4.395 | 84  | 78  | 1.53E-03 |
| cg05477027 | <i>DMWD</i>     | -4.718 | 66  | 96  | 1.53E-03 |
| cg09889850 | <i>C14orf11</i> | -4.174 | 70  | 92  | 1.53E-03 |
| cg01541629 | <i>NSUN2</i>    | -5.225 | 91  | 71  | 1.53E-03 |
| cg15565533 | <i>GMPPB</i>    | -4.880 | 67  | 95  | 1.53E-03 |
| cg05040447 | <i>QP-C</i>     | -5.759 | 76  | 86  | 1.53E-03 |
| cg25849332 | <i>MGC2574</i>  | -5.013 | 52  | 110 | 1.53E-03 |
| cg07013734 | <i>TRPC6</i>    | -4.351 | 97  | 65  | 1.54E-03 |
| cg07059875 | <i>TACSTD1</i>  | -3.265 | 124 | 38  | 1.54E-03 |
| cg00881086 | <i>NPHP3</i>    | -4.370 | 107 | 55  | 1.54E-03 |
| cg00598858 | <i>PRKCSH</i>   | -5.486 | 93  | 69  | 1.54E-03 |
| cg01211097 | <i>USP10</i>    | -0.623 | 88  | 74  | 1.54E-03 |
| cg03701222 | <i>RAB40C</i>   | -5.437 | 113 | 49  | 1.54E-03 |
| cg15473868 | <i>MT1X</i>     | -4.431 | 64  | 98  | 1.54E-03 |
| cg16321029 | <i>SNRPN</i>    | -0.093 | 82  | 80  | 1.54E-03 |
| cg13162810 | <i>PREI3</i>    | -5.089 | 95  | 67  | 1.54E-03 |
| cg25429010 | <i>IMP3</i>     | -5.134 | 48  | 114 | 1.54E-03 |
| cg21051423 | <i>MTBP</i>     | -5.039 | 113 | 49  | 1.54E-03 |
| cg11632617 | <i>PPCDC</i>    | -3.301 | 105 | 57  | 1.54E-03 |
| cg21020710 | <i>ZNF544</i>   | -5.115 | 102 | 60  | 1.54E-03 |
| cg24680602 | <i>ZNF232</i>   | -3.507 | 86  | 76  | 1.54E-03 |
| cg15808558 | <i>EPHA4</i>    | -4.441 | 66  | 96  | 1.54E-03 |
| cg01717706 | <i>SOCS1</i>    | -4.607 | 57  | 105 | 1.54E-03 |
| cg10394385 | <i>ERBB2</i>    | -2.991 | 95  | 67  | 1.54E-03 |
| cg12800145 | <i>GPRC5D</i>   | 1.502  | 51  | 111 | 1.54E-03 |
| cg23303074 | <i>LRAT</i>     | -3.399 | 113 | 49  | 1.54E-03 |
| cg24905739 | <i>FBXW8</i>    | -5.619 | 103 | 59  | 1.54E-03 |
| cg04698187 | <i>LRRN5</i>    | -3.983 | 110 | 52  | 1.54E-03 |

|            |                  |        |     |     |          |
|------------|------------------|--------|-----|-----|----------|
| cg01602416 | <i>GCSH</i>      | -4.390 | 66  | 96  | 1.54E-03 |
| cg21660687 | <i>GLI1</i>      | -4.641 | 85  | 77  | 1.54E-03 |
| cg05777319 | <i>ARL6</i>      | -5.784 | 129 | 33  | 1.55E-03 |
| cg10377764 | <i>RAD52</i>     | -4.822 | 67  | 95  | 1.55E-03 |
| cg16245339 | <i>DECR2</i>     | -5.176 | 78  | 84  | 1.55E-03 |
| cg13507893 | <i>SLC5A4</i>    | 1.551  | 102 | 59  | 1.55E-03 |
| cg03747695 | <i>ZNF227</i>    | -3.834 | 54  | 108 | 1.55E-03 |
| cg06611310 | <i>LOC129285</i> | -4.674 | 29  | 133 | 1.55E-03 |
| cg21694349 | <i>FBXO24</i>    | -4.081 | 54  | 108 | 1.55E-03 |
| cg15312323 | <i>KRTAP4-4</i>  | 0.410  | 71  | 91  | 1.55E-03 |
| cg03283421 | <i>CUZD1</i>     | 1.208  | 98  | 64  | 1.55E-03 |
| cg07862358 | <i>MYO10</i>     | -4.845 | 92  | 70  | 1.55E-03 |
| cg15308737 | <i>ARSG</i>      | 2.603  | 13  | 148 | 1.55E-03 |
| cg11991627 | <i>C20orf96</i>  | -4.924 | 34  | 128 | 1.55E-03 |
| cg07356753 | <i>GBE1</i>      | -5.620 | 53  | 109 | 1.55E-03 |
| cg23126947 | <i>NSUN3</i>     | 2.350  | 74  | 87  | 1.55E-03 |
| cg01236137 | <i>SUB1</i>      | -3.148 | 48  | 114 | 1.55E-03 |
| cg14350002 | <i>GAS1</i>      | -4.757 | 75  | 87  | 1.56E-03 |
| cg27655905 | <i>C11orf24</i>  | -4.085 | 61  | 101 | 1.56E-03 |
| cg05859842 | <i>FRMPD2</i>    | 0.290  | 86  | 76  | 1.56E-03 |
| cg01422136 | <i>ZCCHC10</i>   | -5.166 | 46  | 116 | 1.56E-03 |
| cg02860543 | <i>IGF2BP3</i>   | -2.666 | 49  | 113 | 1.56E-03 |
| cg16256610 | <i>REEP4</i>     | -5.877 | 64  | 98  | 1.56E-03 |
| cg08434547 | <i>GCN5L2</i>    | -4.470 | 42  | 120 | 1.56E-03 |
| cg06698742 | <i>TMEM126A</i>  | -5.421 | 72  | 90  | 1.56E-03 |
| cg08896629 | <i>TYK2</i>      | -4.565 | 91  | 71  | 1.56E-03 |
| cg15781794 | <i>CHCHD1</i>    | -3.903 | 46  | 116 | 1.57E-03 |
| cg12763546 | <i>ZNF232</i>    | 0.803  | 88  | 74  | 1.57E-03 |
| cg11212312 | <i>IL3</i>       | 2.139  | 101 | 61  | 1.57E-03 |
| cg16467694 | <i>POLR2G</i>    | -5.008 | 65  | 97  | 1.57E-03 |
| cg13959611 | <i>VPS13C</i>    | -4.468 | 54  | 108 | 1.57E-03 |
| cg17918239 | <i>ZNF281</i>    | -2.714 | 75  | 80  | 1.57E-03 |
| cg10823926 | <i>ANKRD35</i>   | -5.049 | 70  | 92  | 1.57E-03 |
| cg03271651 | <i>POGZ</i>      | -2.194 | 41  | 121 | 1.57E-03 |
| cg14133708 | <i>EMILIN2</i>   | -3.519 | 62  | 100 | 1.57E-03 |
| cg14932684 | <i>YAF2</i>      | -5.116 | 119 | 43  | 1.57E-03 |
| cg10415235 | <i>COX8A</i>     | -5.111 | 42  | 120 | 1.57E-03 |
| cg21937169 | <i>ASL</i>       | -4.143 | 40  | 122 | 1.57E-03 |
| cg18110483 | <i>THBS4</i>     | -3.798 | 69  | 93  | 1.57E-03 |
| cg19776201 | <i>ZNF132</i>    | -4.179 | 79  | 83  | 1.57E-03 |
| cg05608188 | <i>FLJ13576</i>  | -5.563 | 61  | 101 | 1.57E-03 |
| cg18530748 | <i>SULT1A1</i>   | -3.417 | 92  | 70  | 1.57E-03 |
| cg23620639 | <i>COL13A1</i>   | -3.282 | 86  | 76  | 1.57E-03 |
| cg15600342 | <i>WBP4</i>      | -4.593 | 90  | 72  | 1.58E-03 |
| cg23690380 | <i>PRMT5</i>     | -4.226 | 96  | 66  | 1.58E-03 |
| cg10276576 | <i>C11orf24</i>  | -5.593 | 71  | 91  | 1.58E-03 |
| cg16799087 | <i>PRDM7</i>     | 1.739  | 91  | 71  | 1.58E-03 |
| cg02435593 | <i>CHMP4B</i>    | -1.815 | 58  | 104 | 1.58E-03 |
| cg04284814 | <i>C5orf16</i>   | -4.616 | 71  | 91  | 1.58E-03 |
| cg17892556 | <i>ZNF625</i>    | -4.052 | 60  | 102 | 1.58E-03 |
| cg11876012 | <i>C16orf33</i>  | 2.030  | 102 | 60  | 1.58E-03 |
| cg16738336 | <i>SKIV2L2</i>   | -5.571 | 83  | 79  | 1.58E-03 |
| cg05832487 | <i>FLJ13909</i>  | -5.115 | 69  | 93  | 1.58E-03 |
| cg03107405 | <i>TSSC1</i>     | -5.753 | 103 | 59  | 1.59E-03 |
| cg01936270 | <i>CYP1B1</i>    | -4.560 | 37  | 125 | 1.59E-03 |

|            |                  |        |     |     |          |
|------------|------------------|--------|-----|-----|----------|
| cg17043101 | <i>NOLC1</i>     | -5.060 | 47  | 115 | 1.59E-03 |
| cg20233029 | <i>B4GALNT2</i>  | -3.268 | 89  | 73  | 1.59E-03 |
| cg12966875 | <i>SLPI</i>      | -3.105 | 46  | 116 | 1.59E-03 |
| cg09930017 | <i>UBC</i>       | -3.022 | 78  | 83  | 1.59E-03 |
| cg12177743 | <i>TTC12</i>     | -4.807 | 80  | 82  | 1.59E-03 |
| cg13461600 | <i>ABCF3</i>     | -4.376 | 55  | 107 | 1.59E-03 |
| cg23517664 | <i>SBDS</i>      | -5.122 | 72  | 90  | 1.59E-03 |
| cg25723866 | <i>LTBP4</i>     | 3.051  | 46  | 116 | 1.59E-03 |
| cg21703572 | <i>SNRPD3</i>    | -3.970 | 41  | 121 | 1.60E-03 |
| cg08573893 | <i>C8orf32</i>   | -4.276 | 69  | 93  | 1.60E-03 |
| cg10551759 | <i>FAM3C</i>     | -5.916 | 74  | 88  | 1.60E-03 |
| cg13548361 | <i>PSD</i>       | -3.879 | 83  | 79  | 1.60E-03 |
| cg25828381 | <i>H2-ALPHA</i>  | 5.715  | 82  | 80  | 1.60E-03 |
| cg11631275 | <i>SDAD1</i>     | 2.541  | 94  | 68  | 1.60E-03 |
| cg17286640 | <i>KDR</i>       | -4.648 | 62  | 100 | 1.60E-03 |
| cg15607672 | <i>OTX2</i>      | -2.012 | 108 | 54  | 1.60E-03 |
| cg22428102 | <i>FLJ30277</i>  | -5.104 | 81  | 81  | 1.60E-03 |
| cg04609859 | <i>HOXB4</i>     | -4.468 | 68  | 94  | 1.61E-03 |
| cg25824226 | <i>EBAG9</i>     | -4.875 | 81  | 81  | 1.61E-03 |
| cg24085207 | <i>FLJ32065</i>  | -4.879 | 79  | 83  | 1.61E-03 |
| cg19655070 | <i>HEXIM2</i>    | -2.966 | 56  | 105 | 1.61E-03 |
| cg01382363 | <i>KIAA0859</i>  | -4.451 | 94  | 68  | 1.61E-03 |
| cg01992081 | <i>MMD</i>       | -4.526 | 110 | 52  | 1.61E-03 |
| cg07348311 | <i>IFIH1</i>     | -4.546 | 65  | 97  | 1.61E-03 |
| cg23548920 | <i>ARRDC2</i>    | -5.548 | 97  | 65  | 1.61E-03 |
| cg14834436 | <i>MNAT1</i>     | -2.998 | 111 | 51  | 1.61E-03 |
| cg16758041 | <i>NDUFB6</i>    | -4.463 | 69  | 93  | 1.61E-03 |
| cg00260778 | <i>C10orf111</i> | 0.209  | 79  | 83  | 1.61E-03 |
| cg27288777 | <i>SUZ12</i>     | -4.620 | 86  | 76  | 1.61E-03 |
| cg19196182 | <i>APAF1</i>     | -4.540 | 99  | 63  | 1.61E-03 |
| cg19867899 | <i>PCDHAC2</i>   | -4.279 | 87  | 75  | 1.61E-03 |
| cg10814135 | <i>ASPSCR1</i>   | -4.513 | 123 | 39  | 1.61E-03 |
| cg04280119 | <i>TAF6</i>      | -4.414 | 60  | 102 | 1.61E-03 |
| cg08878304 | <i>FBXO7</i>     | -3.842 | 76  | 86  | 1.61E-03 |
| cg24683061 | <i>PAIP2</i>     | -4.891 | 91  | 71  | 1.61E-03 |
| cg05040429 | <i>SAMD12</i>    | -4.300 | 36  | 126 | 1.61E-03 |
| cg14710524 | <i>MGC3121</i>   | -5.602 | 61  | 101 | 1.62E-03 |
| cg10196289 | <i>NSMAF</i>     | -5.335 | 79  | 83  | 1.62E-03 |
| cg00253200 | <i>C3orf59</i>   | -4.902 | 59  | 103 | 1.62E-03 |
| cg25619607 | <i>IMPACT</i>    | -5.236 | 70  | 92  | 1.62E-03 |
| cg21852292 | <i>C1orf115</i>  | -2.781 | 72  | 90  | 1.62E-03 |
| cg12508624 | <i>THY1</i>      | -4.241 | 114 | 48  | 1.62E-03 |
| cg08620270 | <i>NUP153</i>    | -5.648 | 89  | 73  | 1.62E-03 |
| cg14399447 | <i>PLA2G4C</i>   | -5.318 | 92  | 70  | 1.62E-03 |
| cg07837262 | <i>SLC39A14</i>  | -5.398 | 49  | 113 | 1.62E-03 |
| cg19401923 | <i>MRPL19</i>    | -5.210 | 90  | 72  | 1.62E-03 |
| cg01476044 | <i>MGAM</i>      | 0.498  | 47  | 114 | 1.62E-03 |
| cg07888234 | <i>TNFRSF11A</i> | -2.989 | 85  | 77  | 1.63E-03 |
| cg11250058 | <i>RAPH1</i>     | -3.289 | 92  | 70  | 1.63E-03 |
| cg01027805 | <i>ZNF219</i>    | -3.773 | 65  | 97  | 1.63E-03 |
| cg08434152 | <i>MOBK1B</i>    | -5.057 | 35  | 127 | 1.63E-03 |
| cg11070941 | <i>STX11</i>     | -5.264 | 61  | 101 | 1.63E-03 |
| cg05727959 | <i>C12orf48</i>  | -6.062 | 113 | 49  | 1.63E-03 |
| cg08450982 | <i>NUMBL</i>     | 0.863  | 106 | 56  | 1.63E-03 |
| cg13502356 | <i>ZMPSTE24</i>  | -5.318 | 62  | 100 | 1.63E-03 |

|            |                  |        |     |     |          |
|------------|------------------|--------|-----|-----|----------|
| cg18284523 | <i>TINF2</i>     | -4.915 | 72  | 90  | 1.63E-03 |
| cg06543761 | <i>PPM2C</i>     | -6.118 | 69  | 93  | 1.63E-03 |
| cg09633588 | <i>C1orf174</i>  | -4.987 | 32  | 130 | 1.63E-03 |
| cg10029076 | <i>ARMET</i>     | -4.494 | 86  | 76  | 1.63E-03 |
| cg22863122 | <i>DUSP7</i>     | -6.037 | 108 | 54  | 1.63E-03 |
| cg22115808 | <i>NUDT16L1</i>  | -5.817 | 128 | 34  | 1.63E-03 |
| cg09329225 | <i>C14orf108</i> | -0.616 | 40  | 114 | 1.63E-03 |
| cg03160309 | <i>PTGS2</i>     | -3.873 | 113 | 49  | 1.63E-03 |
| cg19222480 | <i>UBE2C</i>     | -4.837 | 60  | 102 | 1.64E-03 |
| cg19423014 | <i>RNF152</i>    | -4.511 | 84  | 78  | 1.64E-03 |
| cg08642068 | <i>SPAG4L</i>    | 1.929  | 36  | 126 | 1.64E-03 |
| cg18540871 | <i>FUCA2</i>     | -5.154 | 61  | 101 | 1.64E-03 |
| cg15792367 | <i>KLK11</i>     | 0.321  | 68  | 94  | 1.64E-03 |
| cg16962970 | <i>RASAL2</i>    | -4.695 | 71  | 91  | 1.64E-03 |
| cg16698623 | <i>MGMT</i>      | 2.740  | 52  | 110 | 1.64E-03 |
| cg21722680 | <i>TBK1</i>      | -5.108 | 43  | 119 | 1.64E-03 |
| cg14415214 | <i>PHLDA2</i>    | -5.689 | 107 | 55  | 1.64E-03 |
| cg22421699 | <i>SMPDL3B</i>   | -2.255 | 118 | 44  | 1.64E-03 |
| cg03359285 | <i>TOP2A</i>     | -4.700 | 89  | 73  | 1.64E-03 |
| cg04126816 | <i>HSU79303</i>  | -5.024 | 64  | 98  | 1.64E-03 |
| cg10148280 | <i>HPS3</i>      | -2.324 | 108 | 54  | 1.64E-03 |
| cg18457775 | <i>ATM</i>       | -5.481 | 55  | 107 | 1.64E-03 |
| cg18943599 | <i>SSTR2</i>     | -5.518 | 74  | 88  | 1.64E-03 |
| cg03329165 | <i>CD200</i>     | -4.682 | 45  | 117 | 1.64E-03 |
| cg18999668 | <i>SLC28A3</i>   | 1.860  | 134 | 28  | 1.64E-03 |
| cg17709884 | <i>H2AFZ</i>     | -4.520 | 128 | 34  | 1.64E-03 |
| cg00065385 | <i>ACTL7A</i>    | 3.395  | 60  | 102 | 1.64E-03 |
| cg03354772 | <i>C10orf93</i>  | -3.138 | 111 | 51  | 1.64E-03 |
| cg12515638 | <i>SFRP4</i>     | -3.130 | 52  | 110 | 1.64E-03 |
| cg25969673 | <i>TBC1D19</i>   | -4.413 | 46  | 116 | 1.64E-03 |
| cg06752594 | <i>PSRC1</i>     | -6.308 | 90  | 72  | 1.64E-03 |
| cg22476295 | <i>PDGFA</i>     | -5.871 | 76  | 86  | 1.64E-03 |
| cg22886089 | <i>SCG3</i>      | -4.946 | 85  | 77  | 1.64E-03 |
| cg12800028 | <i>GPR6</i>      | -1.293 | 34  | 128 | 1.64E-03 |
| cg13328485 | <i>ZNF650</i>    | 1.595  | 96  | 62  | 1.65E-03 |
| cg23855818 | <i>SLC41A2</i>   | 0.781  | 57  | 104 | 1.65E-03 |
| cg22784047 | <i>MVP</i>       | 1.550  | 69  | 93  | 1.65E-03 |
| cg19847271 | <i>PRIM1</i>     | -4.724 | 47  | 115 | 1.65E-03 |
| cg17747005 | <i>DEPDC2</i>    | -3.998 | 38  | 124 | 1.65E-03 |
| cg19914751 | <i>QARS</i>      | -4.589 | 109 | 53  | 1.65E-03 |
| cg09855435 | <i>IL22RA2</i>   | 2.346  | 20  | 142 | 1.65E-03 |
| cg16984812 | <i>PLEKHH2</i>   | 2.201  | 63  | 99  | 1.65E-03 |
| cg23109897 | <i>PRKDC</i>     | -1.543 | 134 | 24  | 1.65E-03 |
| cg22222251 | <i>WBSCR19</i>   | 0.742  | 135 | 27  | 1.65E-03 |
| cg17754980 | <i>FAM54A</i>    | -4.971 | 42  | 120 | 1.66E-03 |
| cg18468219 | <i>MARVELD3</i>  | -3.742 | 67  | 95  | 1.66E-03 |
| cg23325242 | <i>CYB5R3</i>    | -3.657 | 46  | 116 | 1.66E-03 |
| cg12572827 | <i>PDE6H</i>     | 2.897  | 49  | 113 | 1.66E-03 |
| cg22269180 | <i>ATP10A</i>    | 1.923  | 24  | 138 | 1.66E-03 |
| cg22411207 | <i>MOS</i>       | -3.509 | 97  | 65  | 1.66E-03 |
| cg10133777 | <i>ZD52F10</i>   | 0.048  | 90  | 72  | 1.66E-03 |
| cg07744166 | <i>WASF3</i>     | -4.202 | 135 | 27  | 1.66E-03 |
| cg16418163 | <i>ACPL2</i>     | -5.862 | 89  | 73  | 1.66E-03 |
| cg27265637 | <i>SEC24C</i>    | -4.179 | 59  | 103 | 1.66E-03 |
| cg21065959 | <i>LCE1E</i>     | 0.582  | 112 | 50  | 1.66E-03 |

|            |                  |        |     |     |          |
|------------|------------------|--------|-----|-----|----------|
| cg25345005 | <i>C3orf9</i>    | -5.953 | 83  | 79  | 1.66E-03 |
| cg12997958 | <i>FLII</i>      | -4.121 | 47  | 115 | 1.66E-03 |
| cg11400333 | <i>MGC33486</i>  | -4.508 | 87  | 75  | 1.66E-03 |
| cg22017387 | <i>VPS33B</i>    | -4.653 | 83  | 79  | 1.66E-03 |
| cg17989037 | <i>PRR11</i>     | -3.711 | 44  | 118 | 1.67E-03 |
| cg02161900 | <i>IRXL1</i>     | -2.501 | 77  | 85  | 1.67E-03 |
| cg10839521 | <i>FLJ32786</i>  | -4.608 | 66  | 96  | 1.67E-03 |
| cg11868029 | <i>CTSC</i>      | -4.704 | 85  | 77  | 1.67E-03 |
| cg24167037 | <i>ITGB2</i>     | -0.582 | 96  | 66  | 1.67E-03 |
| cg23667933 | <i>FXN</i>       | -4.993 | 39  | 123 | 1.67E-03 |
| cg08012454 | <i>KIF5B</i>     | -5.491 | 77  | 85  | 1.67E-03 |
| cg27478659 | <i>KRT16</i>     | 0.432  | 84  | 78  | 1.67E-03 |
| cg10266188 | <i>TXLNA</i>     | -4.885 | 59  | 103 | 1.67E-03 |
| cg19279529 | <i>USF2</i>      | -5.178 | 43  | 119 | 1.67E-03 |
| cg23740844 | <i>ATP5L</i>     | -4.050 | 105 | 57  | 1.67E-03 |
| cg15371509 | <i>C1orf60</i>   | -4.837 | 82  | 80  | 1.67E-03 |
| cg24409107 | <i>GALE</i>      | -5.988 | 97  | 65  | 1.67E-03 |
| cg10741369 | <i>TRIM7</i>     | -3.098 | 97  | 65  | 1.68E-03 |
| cg17085299 | <i>IRF2BP1</i>   | -6.208 | 71  | 91  | 1.68E-03 |
| cg11480873 | <i>RAB7L1</i>    | -5.268 | 47  | 115 | 1.68E-03 |
| cg21176048 | <i>PEX5L</i>     | -4.931 | 105 | 57  | 1.68E-03 |
| cg02917064 | <i>SMARCD3</i>   | -4.085 | 91  | 71  | 1.68E-03 |
| cg11713336 | <i>UBE2D2</i>    | -4.708 | 25  | 137 | 1.68E-03 |
| cg15210596 | <i>SCCPDH</i>    | -4.818 | 107 | 55  | 1.69E-03 |
| cg07879727 | <i>WNT3</i>      | -4.583 | 95  | 67  | 1.69E-03 |
| cg14126210 | <i>MCFD2</i>     | -5.638 | 84  | 78  | 1.69E-03 |
| cg07484827 | <i>CHRNA10</i>   | 1.399  | 32  | 130 | 1.69E-03 |
| cg27106233 | <i>DDIT4</i>     | -5.465 | 77  | 85  | 1.69E-03 |
| cg09351449 | <i>C20orf172</i> | -5.468 | 49  | 113 | 1.69E-03 |
| cg01634119 | <i>GMPS</i>      | -4.842 | 92  | 70  | 1.70E-03 |
| cg13650689 | <i>PRPF31</i>    | -5.939 | 44  | 118 | 1.70E-03 |
| cg14008119 | <i>MGC16028</i>  | -4.739 | 68  | 94  | 1.70E-03 |
| cg14106308 | <i>VEPH1</i>     | -4.341 | 73  | 89  | 1.70E-03 |
| cg14618681 | <i>E2F1</i>      | -5.431 | 55  | 107 | 1.70E-03 |
| cg16094954 | <i>BCL3</i>      | -4.564 | 104 | 58  | 1.70E-03 |
| cg07072643 | <i>EMR3</i>      | 0.678  | 34  | 127 | 1.70E-03 |
| cg20774846 | <i>DPYS</i>      | -0.767 | 110 | 52  | 1.70E-03 |
| cg18053505 | <i>PCAF</i>      | -3.972 | 121 | 41  | 1.70E-03 |
| cg24171152 | <i>ATP2B1</i>    | 3.401  | 62  | 100 | 1.70E-03 |
| cg06554542 | <i>GNPTAB</i>    | -5.454 | 116 | 46  | 1.70E-03 |
| cg05714219 | <i>GALNT14</i>   | -4.860 | 90  | 72  | 1.70E-03 |
| cg04916311 | <i>PQLC3</i>     | -4.839 | 91  | 71  | 1.70E-03 |
| cg15665653 | <i>WDTC1</i>     | -3.870 | 120 | 42  | 1.70E-03 |
| cg11768416 | <i>C12orf12</i>  | 4.825  | 71  | 91  | 1.70E-03 |
| cg17256555 | <i>C8orf53</i>   | -4.421 | 71  | 91  | 1.71E-03 |
| cg12064626 | <i>SH3BGR</i>    | -5.339 | 111 | 51  | 1.71E-03 |
| cg20785344 | <i>PGAM5</i>     | -5.568 | 97  | 65  | 1.71E-03 |
| cg04982748 | <i>HELB</i>      | -3.706 | 110 | 52  | 1.71E-03 |
| cg11896271 | <i>PANX2</i>     | -3.222 | 112 | 50  | 1.71E-03 |
| cg17965230 | <i>PRDM1</i>     | -5.408 | 76  | 86  | 1.71E-03 |
| cg13959523 | <i>CHST8</i>     | -3.832 | 76  | 86  | 1.71E-03 |
| cg09555217 | <i>SMAP</i>      | -3.674 | 108 | 54  | 1.71E-03 |
| cg18942631 | <i>CASQ2</i>     | -0.027 | 47  | 115 | 1.71E-03 |
| cg06394897 | <i>AK2</i>       | -2.944 | 21  | 141 | 1.71E-03 |
| cg00605270 | <i>SMPDL3B</i>   | -4.505 | 106 | 56  | 1.72E-03 |

|            |                  |        |     |     |          |
|------------|------------------|--------|-----|-----|----------|
| cg24371157 | <i>PDCD4</i>     | -5.076 | 45  | 117 | 1.72E-03 |
| cg27226214 | <i>VHL</i>       | 1.825  | 129 | 33  | 1.72E-03 |
| cg20641660 | <i>C11orf30</i>  | -3.897 | 103 | 59  | 1.72E-03 |
| cg11052068 | <i>CDC40</i>     | -4.388 | 97  | 65  | 1.72E-03 |
| cg14789590 | <i>BPIL2</i>     | 2.608  | 121 | 41  | 1.72E-03 |
| cg22730004 | <i>SPTA1</i>     | 0.051  | 44  | 117 | 1.73E-03 |
| cg00659953 | <i>C16orf24</i>  | -5.456 | 39  | 123 | 1.73E-03 |
| cg03484533 | <i>FABP3</i>     | -5.651 | 49  | 113 | 1.73E-03 |
| cg13856728 | <i>CREBBP</i>    | -5.329 | 35  | 127 | 1.73E-03 |
| cg02449978 | <i>CDC25A</i>    | -4.803 | 64  | 98  | 1.73E-03 |
| cg27591196 | <i>GALNACT-2</i> | -5.261 | 95  | 67  | 1.73E-03 |
| cg10098216 | <i>NDUFB8</i>    | -4.478 | 109 | 53  | 1.73E-03 |
| cg12227762 | <i>GNPNAT1</i>   | -5.249 | 63  | 99  | 1.73E-03 |
| cg17675150 | <i>ZNF532</i>    | 1.257  | 85  | 77  | 1.73E-03 |
| cg09556292 | <i>RCOR1</i>     | -4.829 | 69  | 93  | 1.73E-03 |
| cg21618713 | <i>ARFIP1</i>    | -4.649 | 71  | 91  | 1.73E-03 |
| cg03354519 | <i>ANXA5</i>     | -4.268 | 94  | 68  | 1.73E-03 |
| cg07327468 | <i>EYA4</i>      | -2.375 | 84  | 78  | 1.73E-03 |
| cg07964133 | <i>HNRPD</i>     | -3.402 | 87  | 75  | 1.73E-03 |
| cg03522216 | <i>GOLPH3</i>    | -5.364 | 62  | 100 | 1.73E-03 |
| cg14209569 | <i>COMMD4</i>    | -4.917 | 63  | 99  | 1.74E-03 |
| cg16579354 | <i>XRCC5</i>     | -4.396 | 73  | 89  | 1.74E-03 |
| cg07084163 | <i>UGT3A2</i>    | -2.388 | 122 | 40  | 1.74E-03 |
| cg24513045 | <i>RGS19</i>     | -3.213 | 124 | 38  | 1.74E-03 |
| cg11326640 | <i>STAU</i>      | -4.615 | 70  | 92  | 1.74E-03 |
| cg06321883 | <i>COL19A1</i>   | -3.430 | 87  | 75  | 1.74E-03 |
| cg27005179 | <i>ERBB2</i>     | -5.301 | 93  | 69  | 1.74E-03 |
| cg19109050 | <i>OBSCN</i>     | 0.665  | 32  | 130 | 1.74E-03 |
| cg04605667 | <i>SIAH2</i>     | -3.964 | 83  | 79  | 1.74E-03 |
| cg04650786 | <i>OSTM1</i>     | -4.769 | 52  | 110 | 1.74E-03 |
| cg07807709 | <i>HIST2H2AB</i> | -3.496 | 45  | 117 | 1.74E-03 |
| cg04912050 | <i>IDUA</i>      | -4.863 | 90  | 72  | 1.74E-03 |
| cg20587336 | <i>ARMC1</i>     | -4.198 | 59  | 103 | 1.75E-03 |
| cg21369988 | <i>C1QDC1</i>    | -4.960 | 88  | 74  | 1.75E-03 |
| cg15696781 | <i>MSTO1</i>     | -4.827 | 101 | 61  | 1.75E-03 |
| cg03039172 | <i>SIX5</i>      | -4.784 | 43  | 119 | 1.75E-03 |
| cg13188385 | <i>SRGAP3</i>    | -5.357 | 63  | 99  | 1.75E-03 |
| cg21307697 | <i>EXOSC7</i>    | -4.645 | 64  | 98  | 1.75E-03 |
| cg04317940 | <i>PMS2</i>      | -4.956 | 25  | 137 | 1.75E-03 |
| cg06122080 | <i>OXSM</i>      | -3.734 | 54  | 108 | 1.75E-03 |
| cg16519321 | <i>MYOD1</i>     | -2.746 | 99  | 63  | 1.75E-03 |
| cg11626656 | <i>RND3</i>      | -4.116 | 41  | 121 | 1.75E-03 |
| cg16666115 | <i>MRPS18A</i>   | -5.234 | 90  | 72  | 1.75E-03 |
| cg24794734 | <i>AGL</i>       | -4.567 | 91  | 71  | 1.75E-03 |
| cg23350580 | <i>TBC1D3C</i>   | 1.666  | 46  | 116 | 1.75E-03 |
| cg14116122 | <i>CART1</i>     | -4.596 | 66  | 96  | 1.75E-03 |
| cg07512517 |                  | -0.727 | 79  | 83  | 1.75E-03 |
| cg18928687 | <i>DCUN1D5</i>   | -6.174 | 76  | 86  | 1.75E-03 |
| cg23051655 | <i>SCYL3</i>     | -5.386 | 83  | 79  | 1.75E-03 |
| cg08992050 | <i>IRAK4</i>     | -5.396 | 99  | 63  | 1.76E-03 |
| cg07688613 | <i>C1orf60</i>   | -3.890 | 79  | 83  | 1.76E-03 |
| cg26829318 | <i>GLRX</i>      | -4.600 | 109 | 53  | 1.76E-03 |
| cg24408511 | <i>C12orf51</i>  | 3.058  | 59  | 103 | 1.76E-03 |
| cg26114571 | <i>BRUNOL5</i>   | -5.178 | 50  | 112 | 1.76E-03 |
| cg15636365 | <i>C9orf111</i>  | -4.382 | 55  | 107 | 1.76E-03 |

|            |                 |        |     |     |          |
|------------|-----------------|--------|-----|-----|----------|
| cg26745540 | <i>NPY1R</i>    | -3.169 | 82  | 80  | 1.76E-03 |
| cg13884546 | <i>MRS2L</i>    | -4.783 | 55  | 107 | 1.76E-03 |
| cg20755353 | <i>SSU72</i>    | -4.040 | 88  | 74  | 1.76E-03 |
| cg19468534 | <i>NUSAP1</i>   | 0.564  | 76  | 85  | 1.77E-03 |
| cg13778073 | <i>HSPA4</i>    | -4.521 | 74  | 88  | 1.77E-03 |
| cg18651821 | <i>PDCD2</i>    | -4.993 | 55  | 107 | 1.77E-03 |
| cg18127191 | <i>CDC7</i>     | -4.840 | 121 | 41  | 1.77E-03 |
| cg18555117 | <i>DDHD1</i>    | -2.290 | 117 | 45  | 1.77E-03 |
| cg26062856 | <i>ATP10A</i>   | 1.453  | 43  | 119 | 1.77E-03 |
| cg03960217 | <i>LCE2C</i>    | -0.398 | 73  | 89  | 1.77E-03 |
| cg20716064 | <i>USP6NL</i>   | -5.351 | 77  | 85  | 1.77E-03 |
| cg17865752 | <i>CCNT2</i>    | -2.118 | 106 | 56  | 1.77E-03 |
| cg01409734 | <i>TRAFD1</i>   | -3.851 | 70  | 92  | 1.77E-03 |
| cg20979799 | <i>RFXDC1</i>   | -2.388 | 113 | 49  | 1.77E-03 |
| cg22405555 | <i>ALG12</i>    | -5.651 | 39  | 123 | 1.77E-03 |
| cg27363310 | <i>ZNF84</i>    | -4.520 | 89  | 73  | 1.77E-03 |
| cg21610516 | <i>MTHFD1L</i>  | -2.692 | 117 | 45  | 1.77E-03 |
| cg27056853 | <i>DPP8</i>     | -5.029 | 92  | 70  | 1.77E-03 |
| cg06615154 | <i>S100A3</i>   | 0.996  | 29  | 133 | 1.77E-03 |
| cg12785087 | <i>FLJ13848</i> | -5.257 | 92  | 70  | 1.77E-03 |
| cg07641524 | <i>MSRB3</i>    | -2.965 | 99  | 63  | 1.77E-03 |
| cg21666217 | <i>TRIM33</i>   | -6.217 | 91  | 71  | 1.78E-03 |
| cg13696887 | <i>KRTHB2</i>   | 3.429  | 51  | 111 | 1.78E-03 |
| cg18312807 | <i>RAB3GAP1</i> | -5.069 | 41  | 121 | 1.78E-03 |
| cg19035993 | <i>MGC50372</i> | 3.314  | 41  | 121 | 1.78E-03 |
| cg27504805 | <i>NPY2R</i>    | -4.379 | 80  | 82  | 1.78E-03 |
| cg22760576 | <i>EYA3</i>     | -5.641 | 127 | 35  | 1.78E-03 |
| cg27449959 | <i>ZNF517</i>   | -3.737 | 109 | 53  | 1.78E-03 |
| cg02071439 | <i>FLJ36779</i> | -4.995 | 51  | 111 | 1.78E-03 |
| cg07211259 | <i>PDCD1LG2</i> | -2.701 | 56  | 106 | 1.78E-03 |
| cg26054395 | <i>MTF2</i>     | -5.449 | 102 | 60  | 1.78E-03 |
| cg03375833 | <i>TTLL3</i>    | 2.208  | 48  | 114 | 1.79E-03 |
| cg05754631 | <i>GAB1</i>     | -3.991 | 44  | 118 | 1.79E-03 |
| cg17740305 | <i>GBP5</i>     | 1.877  | 44  | 118 | 1.79E-03 |
| cg26608032 | <i>MKL1</i>     | -5.569 | 47  | 115 | 1.79E-03 |
| cg13043862 | <i>EYA1</i>     | -3.837 | 107 | 55  | 1.79E-03 |
| cg00887101 | <i>KIAA1698</i> | -3.676 | 122 | 40  | 1.79E-03 |
| cg01639034 | <i>KIAA0859</i> | -4.528 | 63  | 99  | 1.79E-03 |
| cg14785449 | <i>ASNS</i>     | -4.294 | 53  | 109 | 1.79E-03 |
| cg08548888 | <i>MYD88</i>    | -2.728 | 63  | 99  | 1.79E-03 |
| cg14758413 | <i>DHX30</i>    | -4.960 | 99  | 63  | 1.79E-03 |
| cg20715219 | <i>DDX17</i>    | -5.872 | 109 | 53  | 1.79E-03 |
| cg25533361 | <i>EIF3S9</i>   | -4.816 | 114 | 48  | 1.79E-03 |
| cg00113951 | <i>CABP1</i>    | -2.594 | 84  | 78  | 1.80E-03 |
| cg16604218 | <i>EIF2B3</i>   | -1.594 | 87  | 75  | 1.80E-03 |
| cg17776353 | <i>BMPR1A</i>   | -5.220 | 137 | 25  | 1.80E-03 |
| cg23582919 | <i>UBPH</i>     | -3.053 | 19  | 143 | 1.80E-03 |
| cg24322623 | <i>MYOD1</i>    | -4.101 | 86  | 76  | 1.80E-03 |
| cg24549507 | <i>C6orf145</i> | -3.837 | 52  | 110 | 1.80E-03 |
| cg26135716 | <i>GLUL</i>     | -5.221 | 99  | 63  | 1.80E-03 |
| cg03322129 | <i>UBE2J2</i>   | -4.699 | 91  | 71  | 1.81E-03 |
| cg04319097 | <i>ZFP161</i>   | 2.239  | 103 | 59  | 1.81E-03 |
| cg02640558 | <i>PPP3CC</i>   | -5.590 | 64  | 98  | 1.81E-03 |
| cg06132324 | <i>POLH</i>     | -4.566 | 83  | 79  | 1.81E-03 |
| cg17717588 | <i>GTDC1</i>    | 2.459  | 78  | 84  | 1.81E-03 |

|            |                  |        |     |     |          |
|------------|------------------|--------|-----|-----|----------|
| cg23131950 | <i>AP2S1</i>     | 1.695  | 70  | 92  | 1.81E-03 |
| cg16616734 | <i>ANKRD13</i>   | -5.298 | 45  | 117 | 1.81E-03 |
| cg24502084 | <i>MAPBPIP</i>   | -4.661 | 97  | 65  | 1.81E-03 |
| cg02617361 | <i>FNTA</i>      | -5.733 | 27  | 135 | 1.81E-03 |
| cg25169784 | <i>UGCGL2</i>    | -4.268 | 79  | 83  | 1.81E-03 |
| cg27322545 | <i>PLAA</i>      | -5.737 | 44  | 118 | 1.81E-03 |
| cg10337819 | <i>LTB4R2</i>    | 2.619  | 129 | 33  | 1.81E-03 |
| cg00901493 | <i>YBX2</i>      | -3.486 | 57  | 105 | 1.81E-03 |
| cg19001490 | <i>POU2F1</i>    | -3.126 | 72  | 90  | 1.81E-03 |
| cg02217159 | <i>KHDRBS2</i>   | -3.498 | 75  | 87  | 1.81E-03 |
| cg22585269 | <i>CHEK2</i>     | -2.641 | 34  | 126 | 1.82E-03 |
| cg02470959 | <i>SFRS8</i>     | -2.721 | 87  | 75  | 1.82E-03 |
| cg23318804 | <i>C15orf39</i>  | -5.834 | 55  | 107 | 1.82E-03 |
| cg07192857 | <i>HSPA1B</i>    | -4.563 | 79  | 83  | 1.82E-03 |
| cg17592734 | <i>ZNF175</i>    | -5.172 | 108 | 54  | 1.82E-03 |
| cg17809798 | <i>SNW1</i>      | -4.683 | 78  | 84  | 1.82E-03 |
| cg05719902 | <i>LOC136306</i> | 0.511  | 42  | 120 | 1.82E-03 |
| cg00269115 | <i>LOC148898</i> | -5.569 | 104 | 58  | 1.82E-03 |
| cg25990314 | <i>GNB1L</i>     | -4.745 | 64  | 98  | 1.82E-03 |
| cg04270274 | <i>CNOT1</i>     | -3.920 | 55  | 107 | 1.82E-03 |
| cg01947224 | <i>ZNF416</i>    | -4.075 | 59  | 103 | 1.82E-03 |
| cg16222568 | <i>APEG1</i>     | 1.925  | 113 | 49  | 1.83E-03 |
| cg13814950 | <i>DAPK1</i>     | -4.672 | 90  | 72  | 1.83E-03 |
| cg09989883 | <i>MRPS22</i>    | -5.286 | 64  | 98  | 1.83E-03 |
| cg19104072 | <i>B3GNT6</i>    | -5.301 | 49  | 113 | 1.83E-03 |
| cg00183782 | <i>MEF2A</i>     | 1.664  | 114 | 48  | 1.83E-03 |
| cg06039624 | <i>MGC16943</i>  | -5.359 | 69  | 93  | 1.83E-03 |
| cg19305227 | <i>SLC28A2</i>   | 1.568  | 57  | 105 | 1.83E-03 |
| cg25274750 | <i>HIPK2</i>     | 1.755  | 133 | 29  | 1.83E-03 |
| cg14623518 | <i>BAIAP2</i>    | -5.456 | 102 | 60  | 1.83E-03 |
| cg24329374 | <i>NIPSNAP3A</i> | -5.910 | 77  | 85  | 1.83E-03 |
| cg04076481 | <i>FLJ12949</i>  | -3.320 | 133 | 29  | 1.83E-03 |
| cg10402626 | <i>RPS5</i>      | -5.544 | 87  | 75  | 1.84E-03 |
| cg22333016 | <i>FIP1L1</i>    | -4.766 | 78  | 84  | 1.84E-03 |
| cg00714377 | <i>SLA2</i>      | -1.483 | 103 | 59  | 1.84E-03 |
| cg10693071 | <i>TRIM36</i>    | -2.010 | 101 | 61  | 1.84E-03 |
| cg11007423 | <i>SPPL2A</i>    | -3.736 | 72  | 90  | 1.84E-03 |
| cg05093686 | <i>MAB21L1</i>   | -1.137 | 117 | 45  | 1.84E-03 |
| cg04984200 | <i>CTSD</i>      | -5.573 | 63  | 99  | 1.84E-03 |
| cg14663792 | <i>C6orf48</i>   | -4.295 | 51  | 111 | 1.84E-03 |
| cg00116234 | <i>ADAMTSL1</i>  | -3.806 | 89  | 73  | 1.84E-03 |
| cg00761755 | <i>SLC43A2</i>   | -5.630 | 84  | 78  | 1.84E-03 |
| cg14586939 | <i>NPY2R</i>     | -4.996 | 120 | 42  | 1.84E-03 |
| cg19522294 | <i>PVRL3</i>     | -4.463 | 78  | 84  | 1.84E-03 |
| cg00160914 | <i>C1orf183</i>  | -2.344 | 110 | 52  | 1.84E-03 |
| cg00303548 | <i>HS6ST3</i>    | -4.930 | 72  | 90  | 1.84E-03 |
| cg21006686 | <i>NOS1</i>      | 0.233  | 62  | 100 | 1.84E-03 |
| cg00521598 | <i>MYCBP</i>     | -3.856 | 85  | 77  | 1.85E-03 |
| cg19913889 | <i>FLJ90024</i>  | -5.023 | 55  | 107 | 1.85E-03 |
| cg20481343 | <i>MAP7</i>      | -4.376 | 81  | 81  | 1.85E-03 |
| cg24145210 | <i>NPM1</i>      | -3.757 | 43  | 119 | 1.85E-03 |
| cg01184522 | <i>ZNF496</i>    | -5.017 | 69  | 93  | 1.85E-03 |
| cg17758721 | <i>SNRPB</i>     | -2.776 | 18  | 144 | 1.85E-03 |
| cg23043119 | <i>STARD4</i>    | -4.894 | 66  | 96  | 1.85E-03 |
| cg02430692 | <i>PEX5L</i>     | -4.128 | 82  | 80  | 1.85E-03 |

|            |               |        |     |     |          |
|------------|---------------|--------|-----|-----|----------|
| cg25385272 | TAF1A         | -4.754 | 102 | 60  | 1.85E-03 |
| cg18470891 | FOXM1         | -4.094 | 68  | 94  | 1.85E-03 |
| cg02460120 | USP15         | -4.676 | 37  | 125 | 1.85E-03 |
| cg12012699 | DYM           | -5.865 | 87  | 75  | 1.86E-03 |
| cg19594691 | RHOB          | -4.802 | 62  | 100 | 1.86E-03 |
| cg24313770 | CGI-115       | -4.618 | 46  | 116 | 1.86E-03 |
| cg16468729 | IL8           | -2.282 | 47  | 114 | 1.86E-03 |
| cg20859470 | RPS27         | -4.267 | 50  | 112 | 1.86E-03 |
| cg22917487 | CX3CR1        | 3.021  | 90  | 72  | 1.86E-03 |
| cg03382564 | FLJ25476      | -5.080 | 76  | 86  | 1.86E-03 |
| cg18760752 | PAFAH1B3      | -3.355 | 35  | 127 | 1.86E-03 |
| cg19868691 | WNT10A        | -2.039 | 56  | 106 | 1.86E-03 |
| cg25468723 | SEZ6L         | -4.900 | 60  | 102 | 1.86E-03 |
| cg27477205 | MKRN2         | -3.913 | 24  | 138 | 1.86E-03 |
| cg12216205 | C6orf111      | 2.328  | 93  | 69  | 1.86E-03 |
| cg01206472 | TOMM22        | -6.193 | 79  | 83  | 1.87E-03 |
| cg02393447 | C15orf20      | -4.169 | 63  | 99  | 1.87E-03 |
| cg20472433 | TKT           | -4.440 | 92  | 70  | 1.87E-03 |
| cg25086702 | HMGB2         | -5.126 | 49  | 113 | 1.87E-03 |
| cg23580945 | FLJ43826      | 2.438  | 55  | 107 | 1.87E-03 |
| cg21655693 | SYMPK         | -4.367 | 121 | 41  | 1.87E-03 |
| cg23896056 | DKFZp686L1814 | -3.956 | 53  | 109 | 1.87E-03 |
| cg09350274 | GFRA3         | -3.820 | 83  | 79  | 1.87E-03 |
| cg12508214 | FBXO32        | -4.938 | 86  | 76  | 1.87E-03 |
| cg23540518 | TRIM17        | -1.520 | 111 | 51  | 1.87E-03 |
| cg27154163 | KIT           | -4.394 | 114 | 48  | 1.87E-03 |
| cg02629257 | EPPB9         | 2.383  | 97  | 65  | 1.87E-03 |
| cg04310824 | SCP2          | -5.511 | 87  | 75  | 1.87E-03 |
| cg22762951 | NVL           | -4.489 | 71  | 91  | 1.87E-03 |
| cg09262269 | LOX           | -3.755 | 95  | 67  | 1.88E-03 |
| cg11142466 | LOC51315      | -4.970 | 75  | 87  | 1.88E-03 |
| cg23509064 | FN3KRP        | -2.640 | 48  | 114 | 1.88E-03 |
| cg22418360 | UBE2F         | -3.075 | 89  | 73  | 1.88E-03 |
| cg12814525 | MDC1          | -5.568 | 56  | 106 | 1.88E-03 |
| cg22068211 | C3orf27       | 2.277  | 96  | 66  | 1.88E-03 |
| cg23057732 | C3orf39       | -4.319 | 55  | 107 | 1.88E-03 |
| cg05129930 | PFKL          | -5.648 | 74  | 88  | 1.88E-03 |
| cg25341032 | ADD3          | -0.263 | 78  | 84  | 1.88E-03 |
| cg08558873 | ZNF214        | -4.030 | 63  | 99  | 1.88E-03 |
| cg09328024 | DYRK3         | -2.937 | 75  | 87  | 1.88E-03 |
| cg14849559 | TMBIM1        | -4.383 | 72  | 90  | 1.88E-03 |
| cg24678320 | FLJ38451      | 2.906  | 61  | 101 | 1.88E-03 |
| cg05674199 | AHCY          | -2.537 | 114 | 48  | 1.88E-03 |
| cg17127587 | TMEM45A       | -4.137 | 66  | 96  | 1.88E-03 |
| cg17667972 | KRT4          | 0.533  | 61  | 101 | 1.89E-03 |
| cg10534672 | C1QTNF2       | -3.537 | 104 | 58  | 1.89E-03 |
| cg22682953 | PTPN11        | -5.145 | 94  | 68  | 1.89E-03 |
| cg24192663 | HSPA6         | 2.528  | 38  | 124 | 1.89E-03 |
| cg26675382 | NUP43         | -2.319 | 55  | 107 | 1.89E-03 |
| cg10698222 | FLJ10925      | -4.657 | 106 | 56  | 1.89E-03 |
| cg07504780 | PSMB9         | -4.941 | 82  | 80  | 1.90E-03 |
| cg20315136 | RGS2          | -5.000 | 59  | 103 | 1.90E-03 |
| cg24078828 | WWTR1         | -5.169 | 29  | 133 | 1.90E-03 |
| cg14218343 | ZNF32         | -4.209 | 50  | 112 | 1.90E-03 |
| cg13619915 | SLITRK3       | -4.284 | 61  | 101 | 1.90E-03 |

|            |                  |        |     |     |          |
|------------|------------------|--------|-----|-----|----------|
| cg20149998 | <i>CHCHD8</i>    | -4.090 | 102 | 60  | 1.90E-03 |
| cg21912567 | <i>GADD45G</i>   | -4.511 | 52  | 110 | 1.90E-03 |
| cg25875213 | <i>FLJ37549</i>  | -4.955 | 81  | 81  | 1.90E-03 |
| cg09212468 | <i>C16orf50</i>  | -2.378 | 65  | 97  | 1.90E-03 |
| cg25406735 | <i>FBXO32</i>    | -5.076 | 53  | 109 | 1.90E-03 |
| cg06540941 | <i>VAMP4</i>     | -2.764 | 100 | 62  | 1.90E-03 |
| cg27321979 | <i>C15orf27</i>  | -3.522 | 33  | 129 | 1.90E-03 |
| cg14658285 | <i>LOC113179</i> | -6.066 | 57  | 105 | 1.90E-03 |
| cg04808672 | <i>SMURF2</i>    | -5.098 | 119 | 43  | 1.90E-03 |
| cg06225581 | <i>ZMAT2</i>     | -4.440 | 57  | 105 | 1.90E-03 |
| cg27038197 | <i>C6orf152</i>  | -5.226 | 114 | 48  | 1.91E-03 |
| cg08504905 | <i>LENG1</i>     | -5.380 | 94  | 68  | 1.91E-03 |
| cg26508537 | <i>C10orf6</i>   | -3.899 | 39  | 123 | 1.91E-03 |
| cg09551147 | <i>SORCS3</i>    | -4.615 | 98  | 64  | 1.92E-03 |
| cg23422659 | <i>WNT9B</i>     | -4.932 | 125 | 37  | 1.92E-03 |
| cg22021786 | <i>WFDC8</i>     | 2.524  | 66  | 96  | 1.92E-03 |
| cg08045757 | <i>HDAC7A</i>    | 2.204  | 90  | 72  | 1.92E-03 |
| cg08998501 | <i>ZNF615</i>    | -3.427 | 43  | 119 | 1.92E-03 |
| cg02913089 | <i>PDE8A</i>     | -4.759 | 69  | 93  | 1.92E-03 |
| cg08146221 | <i>PTMS</i>      | -3.662 | 51  | 111 | 1.92E-03 |
| cg00265415 | <i>B3GALNT2</i>  | -5.532 | 43  | 119 | 1.92E-03 |
| cg19996355 | <i>PBX4</i>      | -2.406 | 54  | 108 | 1.92E-03 |
| cg23920441 | <i>ATP1A3</i>    | -3.779 | 97  | 65  | 1.92E-03 |
| cg12032116 | <i>DMXL1</i>     | -4.366 | 55  | 107 | 1.92E-03 |
| cg22202141 | <i>FCGR3A</i>    | 1.637  | 128 | 34  | 1.92E-03 |
| cg19070338 | <i>ASNSD1</i>    | -4.881 | 67  | 95  | 1.93E-03 |
| cg14251536 | <i>C20orf6</i>   | -4.253 | 54  | 108 | 1.93E-03 |
| cg14363494 | <i>RING1</i>     | -4.504 | 101 | 61  | 1.93E-03 |
| cg21168884 | <i>C6orf122</i>  | 1.960  | 53  | 109 | 1.93E-03 |
| cg21615663 | <i>MGC35048</i>  | 2.457  | 46  | 116 | 1.93E-03 |
| cg24085258 | <i>CHAF1A</i>    | -4.618 | 99  | 63  | 1.93E-03 |
| cg15750102 | <i>MGC16169</i>  | -5.616 | 79  | 83  | 1.93E-03 |
| cg17415721 | <i>SLC29A2</i>   | -3.655 | 93  | 69  | 1.93E-03 |
| cg20303303 | <i>WDR1</i>      | -6.254 | 73  | 89  | 1.93E-03 |
| cg13397379 | <i>OR2C3</i>     | 1.786  | 66  | 96  | 1.93E-03 |
| cg23131777 | <i>ADAM30</i>    | 0.672  | 92  | 70  | 1.93E-03 |
| cg24623694 | <i>PRX</i>       | -1.549 | 83  | 79  | 1.93E-03 |
| cg27537561 | <i>VDR</i>       | -3.074 | 34  | 128 | 1.93E-03 |
| cg02584520 | <i>STAU2</i>     | -4.978 | 89  | 73  | 1.94E-03 |
| cg00836605 | <i>JAZF1</i>     | -5.980 | 66  | 96  | 1.94E-03 |
| cg06746171 | <i>ATOX1</i>     | -4.397 | 50  | 112 | 1.94E-03 |
| cg03835332 | <i>ELL3</i>      | -3.726 | 52  | 110 | 1.94E-03 |
| cg07731916 | <i>IRF2</i>      | -2.266 | 30  | 131 | 1.94E-03 |
| cg24041453 | <i>CCDC11</i>    | -3.422 | 116 | 46  | 1.94E-03 |
| cg26644395 | <i>UCN3</i>      | -0.253 | 65  | 97  | 1.94E-03 |
| cg09657265 | <i>SMPDL3A</i>   | -5.881 | 109 | 53  | 1.94E-03 |
| cg04198824 | <i>USPL1</i>     | -4.350 | 41  | 121 | 1.94E-03 |
| cg02699645 | <i>UBE2G2</i>    | -5.205 | 120 | 42  | 1.94E-03 |
| cg07602026 | <i>PSME1</i>     | -5.098 | 108 | 54  | 1.94E-03 |
| cg10507961 | <i>MGC34732</i>  | -5.008 | 52  | 110 | 1.95E-03 |
| cg18688305 | <i>EIF4ENIF1</i> | -4.439 | 49  | 113 | 1.95E-03 |
| cg25000382 | <i>LOC124216</i> | -5.016 | 60  | 102 | 1.95E-03 |
| cg14112945 | <i>SUV420H2</i>  | -2.650 | 75  | 87  | 1.95E-03 |
| cg05626013 | <i>LRRTM3</i>    | -1.959 | 122 | 40  | 1.95E-03 |
| cg16508857 | <i>WWOX</i>      | -4.210 | 92  | 70  | 1.95E-03 |

|            |                  |        |     |     |          |
|------------|------------------|--------|-----|-----|----------|
| cg16072030 | <i>PPP1R15B</i>  | -5.394 | 68  | 94  | 1.95E-03 |
| cg26411702 | <i>NPM2</i>      | -3.966 | 63  | 99  | 1.95E-03 |
| cg09085198 | <i>ANKRD29</i>   | -4.912 | 96  | 66  | 1.95E-03 |
| cg15749858 | <i>7A5</i>       | -1.725 | 92  | 70  | 1.95E-03 |
| cg03907174 | <i>RCN3</i>      | 2.186  | 76  | 86  | 1.95E-03 |
| cg13515674 | <i>HMGB2</i>     | -5.471 | 47  | 115 | 1.95E-03 |
| cg00873937 | <i>ATOH7</i>     | -4.361 | 97  | 65  | 1.95E-03 |
| cg00276797 | <i>SLK</i>       | -4.697 | 79  | 83  | 1.96E-03 |
| cg18387216 | <i>HDAC2</i>     | -5.902 | 105 | 57  | 1.96E-03 |
| cg00433406 | <i>FLJ32784</i>  | 1.440  | 60  | 102 | 1.96E-03 |
| cg27196745 | <i>PTPRO</i>     | -2.857 | 82  | 80  | 1.96E-03 |
| cg19921492 | <i>PSMB6</i>     | -2.965 | 133 | 29  | 1.96E-03 |
| cg14791831 | <i>LOC112869</i> | -5.493 | 90  | 72  | 1.96E-03 |
| cg26079992 | <i>CDK5RAP1</i>  | -5.236 | 107 | 55  | 1.96E-03 |
| cg02001410 | <i>MAP1B</i>     | -3.527 | 69  | 93  | 1.96E-03 |
| cg18676679 | <i>BANP</i>      | -6.171 | 116 | 46  | 1.96E-03 |
| cg20193716 | <i>MGAT1</i>     | -4.200 | 77  | 85  | 1.96E-03 |
| cg11667754 | <i>CDH1</i>      | -3.700 | 122 | 40  | 1.96E-03 |
| cg05016953 | <i>SLC6A4</i>    | -4.529 | 91  | 71  | 1.96E-03 |
| cg20277670 | <i>HRH2</i>      | 4.773  | 106 | 56  | 1.96E-03 |
| cg09282744 | <i>NOLA2</i>     | -5.422 | 58  | 104 | 1.96E-03 |
| cg21581873 | <i>PLEKHA6</i>   | -2.815 | 59  | 103 | 1.97E-03 |
| cg00892798 | <i>NGFR</i>      | -4.283 | 67  | 95  | 1.97E-03 |
| cg06391660 | <i>DCTN1</i>     | 3.188  | 43  | 119 | 1.97E-03 |
| cg17366325 | <i>RPL19</i>     | -4.065 | 117 | 45  | 1.97E-03 |
| cg18815539 | <i>SLALP</i>     | -5.589 | 34  | 128 | 1.97E-03 |
| cg23788167 | <i>ZA20D2</i>    | -4.640 | 83  | 79  | 1.97E-03 |
| cg27534796 | <i>AIG1</i>      | -4.682 | 44  | 118 | 1.97E-03 |
| cg10833091 | <i>C7orf23</i>   | -4.616 | 88  | 74  | 1.97E-03 |
| cg17080277 | <i>PTPRB</i>     | -4.171 | 77  | 85  | 1.97E-03 |
| cg19016517 | <i>NIFIE14</i>   | -4.065 | 87  | 75  | 1.97E-03 |
| cg03524308 | <i>ZNF585A</i>   | -5.005 | 55  | 107 | 1.97E-03 |
| cg12104707 | <i>ZNF426</i>    | -3.921 | 95  | 67  | 1.97E-03 |
| cg13880228 | <i>PRLR</i>      | -4.101 | 68  | 94  | 1.97E-03 |
| cg19685976 | <i>SPTBN4</i>    | -4.517 | 99  | 63  | 1.97E-03 |
| cg15900519 | <i>RPL32</i>     | -3.961 | 50  | 112 | 1.98E-03 |
| cg19313758 | <i>FAU</i>       | -5.749 | 79  | 83  | 1.98E-03 |
| cg00226904 | <i>SERPINB5</i>  | 0.292  | 116 | 46  | 1.98E-03 |
| cg26668713 | <i>SIPA1</i>     | -4.624 | 83  | 79  | 1.98E-03 |
| cg02903525 | <i>C5AR1</i>     | 1.682  | 85  | 77  | 1.98E-03 |
| cg09730836 | <i>TIGA1</i>     | -5.246 | 72  | 90  | 1.98E-03 |
| cg18943195 | <i>RAB11FIP5</i> | -3.297 | 69  | 93  | 1.98E-03 |
| cg20908993 | <i>ATP6V1D</i>   | -5.212 | 66  | 96  | 1.98E-03 |
| cg25263559 | <i>PTD008</i>    | -4.841 | 48  | 114 | 1.98E-03 |
| cg19706602 | <i>MGMT</i>      | -3.945 | 126 | 36  | 1.98E-03 |
| cg11086568 | <i>WDR53</i>     | -5.632 | 61  | 101 | 1.98E-03 |
| cg06055013 | <i>ATRNL1</i>    | -2.619 | 76  | 86  | 1.98E-03 |
| cg02507175 | <i>PKNOX1</i>    | -4.674 | 48  | 114 | 1.98E-03 |
| cg14380517 | <i>BTG3</i>      | -1.766 | 89  | 73  | 1.98E-03 |
| cg23578193 | <i>LGR6</i>      | -4.742 | 87  | 75  | 1.98E-03 |
| cg08293760 | <i>RAB3GAP2</i>  | -5.289 | 113 | 49  | 1.99E-03 |
| cg08798523 | <i>MTMR6</i>     | -5.112 | 58  | 104 | 1.99E-03 |
| cg15951107 | <i>BAX</i>       | -4.040 | 106 | 56  | 1.99E-03 |
| cg25513133 | <i>C6orf72</i>   | -4.930 | 98  | 64  | 1.99E-03 |
| cg26392924 | <i>SLC23A1</i>   | -2.737 | 87  | 75  | 1.99E-03 |

|            |                  |        |     |     |          |
|------------|------------------|--------|-----|-----|----------|
| cg15882999 | <i>P4HB</i>      | -5.148 | 83  | 79  | 1.99E-03 |
| cg14297876 | <i>MAGOH</i>     | -4.013 | 102 | 60  | 1.99E-03 |
| cg10346242 | <i>ARF3</i>      | -4.408 | 115 | 47  | 1.99E-03 |
| cg07231132 | <i>TMEM92</i>    | -3.898 | 88  | 74  | 1.99E-03 |
| cg13084429 | <i>VWA2</i>      | -3.073 | 69  | 93  | 1.99E-03 |
| cg13401987 | <i>APH1B</i>     | -6.429 | 72  | 90  | 2.00E-03 |
| cg24796403 | <i>FHIT</i>      | -4.886 | 55  | 107 | 2.00E-03 |
| cg11566939 | <i>DULLARD</i>   | -3.550 | 97  | 65  | 2.00E-03 |
| cg00733682 | <i>ZNF44</i>     | -5.646 | 55  | 107 | 2.00E-03 |
| cg01794711 | <i>CNDP2</i>     | -5.445 | 89  | 73  | 2.00E-03 |
| cg12744185 | <i>PCTP</i>      | -4.773 | 122 | 40  | 2.00E-03 |
| cg23950724 | <i>SYT10</i>     | -0.800 | 61  | 101 | 2.00E-03 |
| cg04394967 | <i>RDH12</i>     | -3.643 | 83  | 79  | 2.01E-03 |
| cg05874478 | <i>PSME2</i>     | -1.995 | 85  | 77  | 2.01E-03 |
| cg06105085 | <i>C10orf104</i> | -3.790 | 41  | 121 | 2.01E-03 |
| cg12412075 | <i>LIN7B</i>     | -4.534 | 88  | 74  | 2.01E-03 |
| cg14427173 | <i>RINT-1</i>    | -3.127 | 43  | 119 | 2.01E-03 |
| cg09781054 | <i>ZSWIM1</i>    | -3.311 | 102 | 60  | 2.01E-03 |
| cg26979339 | <i>RIC8B</i>     | -5.175 | 113 | 49  | 2.01E-03 |
| cg00654816 | <i>ZNF509</i>    | -4.676 | 34  | 128 | 2.01E-03 |
| cg13307384 | <i>PRPF40B</i>   | 0.047  | 51  | 111 | 2.01E-03 |
| cg22723026 | <i>ANG</i>       | -5.656 | 90  | 72  | 2.01E-03 |
| cg09826784 | <i>DGCR6L</i>    | -4.832 | 61  | 101 | 2.01E-03 |
| cg09413557 | <i>S100A6</i>    | -5.758 | 61  | 101 | 2.01E-03 |
| cg20200335 | <i>K6IRS4</i>    | 2.391  | 83  | 79  | 2.01E-03 |
| cg17387916 | <i>RPL28</i>     | -5.055 | 86  | 76  | 2.02E-03 |
| cg07981588 | <i>YWHAZ</i>     | -2.766 | 38  | 124 | 2.02E-03 |
| cg05386606 | <i>BCL7B</i>     | -3.793 | 133 | 29  | 2.02E-03 |
| cg09226684 | <i>KLK10</i>     | -2.149 | 76  | 86  | 2.02E-03 |
| cg26129270 | <i>FZD5</i>      | -5.155 | 58  | 104 | 2.02E-03 |
| cg17054360 | <i>MTERF</i>     | -4.157 | 91  | 71  | 2.02E-03 |
| cg24649641 | <i>ERBB2</i>     | -4.669 | 46  | 116 | 2.03E-03 |
| cg25814686 | <i>ZNF696</i>    | -4.556 | 66  | 96  | 2.03E-03 |
| cg22821606 | <i>PTD015</i>    | -4.618 | 45  | 117 | 2.03E-03 |
| cg09643544 | <i>ZNF177</i>    | -2.294 | 84  | 78  | 2.03E-03 |
| cg06240124 | <i>PLK1</i>      | -4.827 | 67  | 95  | 2.03E-03 |
| cg25580018 | <i>ADAMTSL2</i>  | -5.189 | 63  | 99  | 2.03E-03 |
| cg23656380 | <i>ADRM1</i>     | -4.520 | 36  | 126 | 2.03E-03 |
| cg26985138 | <i>C6orf151</i>  | -3.960 | 83  | 79  | 2.03E-03 |
| cg13699808 | <i>PRKCBP1</i>   | -0.709 | 33  | 129 | 2.04E-03 |
| cg04925864 | <i>FAM65A</i>    | -3.160 | 84  | 78  | 2.04E-03 |
| cg13415207 | <i>PMAIP1</i>    | -5.623 | 42  | 120 | 2.04E-03 |
| cg00084687 | <i>GATAD1</i>    | -5.638 | 70  | 92  | 2.04E-03 |
| cg18236079 | <i>HS3ST3A1</i>  | -4.058 | 49  | 113 | 2.04E-03 |
| cg12510755 | <i>EIF3S5</i>    | 0.689  | 111 | 51  | 2.04E-03 |
| cg19928046 | <i>CD74</i>      | -4.436 | 62  | 100 | 2.04E-03 |
| cg05065037 | <i>ZCCHC6</i>    | -4.175 | 75  | 87  | 2.04E-03 |
| cg06840239 | <i>TAF6L</i>     | -4.737 | 29  | 133 | 2.04E-03 |
| cg22096513 | <i>UBA2</i>      | -4.147 | 75  | 87  | 2.04E-03 |
| cg17383958 | <i>RRAS</i>      | -4.354 | 31  | 131 | 2.04E-03 |
| cg05503412 | <i>C4orf14</i>   | -5.007 | 37  | 125 | 2.05E-03 |
| cg01344518 | <i>RGS11</i>     | 0.741  | 108 | 54  | 2.05E-03 |
| cg27185377 | <i>PTTG1</i>     | -3.992 | 95  | 67  | 2.05E-03 |
| cg20491707 | <i>PPYR1</i>     | -0.654 | 28  | 134 | 2.05E-03 |
| cg19332303 | <i>COMMD2</i>    | -4.630 | 55  | 107 | 2.05E-03 |

|            |                  |        |     |     |          |
|------------|------------------|--------|-----|-----|----------|
| cg07236769 | <i>IFNW1</i>     | 0.743  | 141 | 21  | 2.05E-03 |
| cg22546318 | <i>ATP5G2</i>    | -2.771 | 84  | 78  | 2.05E-03 |
| cg08235271 | <i>LPHN2</i>     | -3.960 | 46  | 116 | 2.05E-03 |
| cg05745851 | <i>CCDC62</i>    | -5.167 | 78  | 84  | 2.05E-03 |
| cg06533629 | <i>KLF14</i>     | -3.719 | 130 | 32  | 2.05E-03 |
| cg06616245 | <i>GLI1</i>      | -2.189 | 38  | 124 | 2.05E-03 |
| cg26991292 | <i>NFKBIL1</i>   | -3.656 | 90  | 72  | 2.05E-03 |
| cg26205432 | <i>PLN</i>       | 1.075  | 85  | 61  | 2.05E-03 |
| cg01469547 | <i>OR5P3</i>     | 3.240  | 118 | 44  | 2.05E-03 |
| cg15927263 | <i>PLEKHJ1</i>   | -4.863 | 46  | 116 | 2.06E-03 |
| cg13224710 | <i>TGIF</i>      | 2.104  | 92  | 70  | 2.06E-03 |
| cg10791260 | <i>TNFSF15</i>   | -3.315 | 39  | 123 | 2.06E-03 |
| cg12051359 | <i>DEPDC6</i>    | -5.444 | 69  | 93  | 2.06E-03 |
| cg06600447 | <i>MGC2749</i>   | -4.936 | 65  | 97  | 2.06E-03 |
| cg06282059 | <i>UBE2E1</i>    | 2.195  | 32  | 130 | 2.06E-03 |
| cg03496978 | <i>FBXO28</i>    | -2.281 | 65  | 97  | 2.06E-03 |
| cg15156844 | <i>DLGAP1</i>    | 5.161  | 116 | 46  | 2.06E-03 |
| cg13424446 | <i>GGTLA4</i>    | 1.600  | 58  | 104 | 2.06E-03 |
| cg11164347 | <i>TRAPPC3</i>   | -3.038 | 89  | 69  | 2.07E-03 |
| cg20643362 | <i>C19orf12</i>  | -5.984 | 52  | 110 | 2.07E-03 |
| cg15676241 | <i>ITGA2</i>     | -2.555 | 82  | 80  | 2.07E-03 |
| cg27485235 | <i>CLCN2</i>     | -5.126 | 81  | 81  | 2.07E-03 |
| cg04658354 | <i>BRCA1</i>     | -3.752 | 74  | 88  | 2.07E-03 |
| cg10303842 | <i>CDH12</i>     | -2.692 | 73  | 89  | 2.07E-03 |
| cg18626709 | <i>LEPREL1</i>   | -5.016 | 127 | 35  | 2.07E-03 |
| cg21870662 | <i>TSR1</i>      | -3.246 | 113 | 49  | 2.07E-03 |
| cg00090147 | <i>GATA4</i>     | -2.619 | 104 | 58  | 2.07E-03 |
| cg08551088 | <i>C10orf119</i> | -3.862 | 75  | 87  | 2.07E-03 |
| cg25948993 | <i>UBXD6</i>     | -5.187 | 96  | 66  | 2.07E-03 |
| cg17261830 | <i>NEK9</i>      | -5.942 | 98  | 64  | 2.08E-03 |
| cg19356189 | <i>KLK10</i>     | -1.048 | 73  | 89  | 2.08E-03 |
| cg00918005 | <i>REG3G</i>     | 2.189  | 45  | 117 | 2.08E-03 |
| cg16092956 | <i>ACSL1</i>     | -4.268 | 114 | 48  | 2.08E-03 |
| cg00751288 | <i>LOC90624</i>  | -5.649 | 69  | 93  | 2.08E-03 |
| cg01457653 | <i>FBXL8</i>     | -4.980 | 114 | 48  | 2.08E-03 |
| cg04339860 | <i>WWP2</i>      | -3.031 | 52  | 110 | 2.08E-03 |
| cg11529128 | <i>LHFPL5</i>    | -4.340 | 64  | 98  | 2.08E-03 |
| cg22719586 | <i>NDOR1</i>     | -5.348 | 80  | 82  | 2.08E-03 |
| cg24490859 | <i>MAGEF1</i>    | -5.151 | 51  | 111 | 2.08E-03 |
| cg26172108 | <i>C7orf31</i>   | -4.312 | 108 | 54  | 2.08E-03 |
| cg04171565 | <i>FLJ22624</i>  | -4.853 | 99  | 63  | 2.08E-03 |
| cg20263942 | <i>GOLPH2</i>    | -2.785 | 60  | 102 | 2.08E-03 |
| cg00275232 | <i>ZNF342</i>    | -4.801 | 60  | 102 | 2.08E-03 |
| cg04963951 | <i>FTMT</i>      | 4.334  | 48  | 114 | 2.09E-03 |
| cg08141463 | <i>PLA1A</i>     | 2.186  | 43  | 119 | 2.09E-03 |
| cg17349753 | <i>RTN4RL2</i>   | -3.313 | 61  | 100 | 2.09E-03 |
| cg19539519 | <i>PYY2</i>      | 3.475  | 102 | 60  | 2.09E-03 |
| cg14947494 | <i>BRP44L</i>    | -4.838 | 28  | 134 | 2.09E-03 |
| cg01918706 | <i>UBE2T</i>     | -5.423 | 82  | 80  | 2.10E-03 |
| cg22467534 | <i>UNC13D</i>    | -3.090 | 108 | 54  | 2.10E-03 |
| cg19691797 | <i>TMEM66</i>    | -5.523 | 110 | 52  | 2.10E-03 |
| cg17627559 | <i>TSPAN32</i>   | 0.266  | 48  | 114 | 2.10E-03 |
| cg25755261 | <i>C14orf10</i>  | -4.894 | 87  | 75  | 2.10E-03 |
| cg21459710 | <i>CDC37</i>     | -3.749 | 38  | 124 | 2.10E-03 |
| cg08431931 | <i>MGC26816</i>  | -2.064 | 151 | 11  | 2.10E-03 |

|            |                 |        |     |     |          |
|------------|-----------------|--------|-----|-----|----------|
| cg24628744 | <i>H2AFY</i>    | -0.594 | 44  | 118 | 2.10E-03 |
| cg10473004 | <i>CPNE3</i>    | -5.532 | 44  | 118 | 2.10E-03 |
| cg16863382 | <i>CTRB1</i>    | 3.260  | 102 | 60  | 2.10E-03 |
| cg14996805 | <i>SUPT4H1</i>  | -5.524 | 53  | 109 | 2.11E-03 |
| cg22068038 | <i>PARP16</i>   | -5.344 | 56  | 106 | 2.11E-03 |
| cg11415932 | <i>POLB</i>     | -4.736 | 55  | 107 | 2.11E-03 |
| cg12582965 | <i>ATP10A</i>   | 4.160  | 45  | 117 | 2.11E-03 |
| cg18383391 | <i>MON1B</i>    | -5.407 | 95  | 67  | 2.11E-03 |
| cg23918676 | <i>C1D</i>      | -2.885 | 91  | 70  | 2.11E-03 |
| cg07060572 | <i>MAML2</i>    | -5.011 | 48  | 114 | 2.11E-03 |
| cg22006386 | <i>C19orf15</i> | -4.388 | 103 | 59  | 2.11E-03 |
| cg01192900 | <i>BTG4</i>     | -2.002 | 107 | 55  | 2.11E-03 |
| cg08871189 | <i>COMMD9</i>   | -4.488 | 93  | 69  | 2.11E-03 |
| cg10256052 | <i>CPSF4</i>    | -5.768 | 51  | 111 | 2.11E-03 |
| cg24217877 | <i>FLJ44674</i> | 0.865  | 130 | 32  | 2.11E-03 |
| cg21597649 | <i>TMEM106B</i> | -4.060 | 80  | 82  | 2.12E-03 |
| cg05759269 | <i>CDKN1A</i>   | -4.203 | 26  | 136 | 2.12E-03 |
| cg16524139 | <i>TCF3</i>     | -4.640 | 40  | 122 | 2.12E-03 |
| cg08970694 | <i>HBE1</i>     | 1.049  | 29  | 133 | 2.12E-03 |
| cg03925809 | <i>GTF2F1</i>   | -6.097 | 54  | 108 | 2.12E-03 |
| cg15434599 | <i>MDM2</i>     | -3.845 | 62  | 100 | 2.12E-03 |
| cg26079320 | <i>POGK</i>     | -3.629 | 74  | 88  | 2.12E-03 |
| cg20131596 | <i>PAM</i>      | -0.817 | 74  | 88  | 2.12E-03 |
| cg02973416 | <i>SLC25A22</i> | -4.777 | 39  | 123 | 2.12E-03 |
| cg04949741 | <i>EFEMP2</i>   | -2.895 | 80  | 81  | 2.12E-03 |
| cg09456329 | <i>MGC39581</i> | -5.163 | 36  | 126 | 2.12E-03 |
| cg13255096 | <i>MAP3K5</i>   | -4.962 | 106 | 56  | 2.12E-03 |
| cg24077317 | <i>UBE1C</i>    | -6.070 | 61  | 101 | 2.12E-03 |
| cg11840540 | <i>FXYP5</i>    | -5.025 | 98  | 64  | 2.12E-03 |
| cg03693601 | <i>SHCBP1</i>   | -5.622 | 87  | 75  | 2.12E-03 |
| cg09970396 | <i>C12orf35</i> | -4.405 | 69  | 93  | 2.12E-03 |
| cg18598959 | <i>PIK4CB</i>   | 0.459  | 115 | 47  | 2.12E-03 |
| cg18870231 | <i>C1orf87</i>  | 1.545  | 102 | 60  | 2.12E-03 |
| cg08461397 | <i>SNTB2</i>    | -3.899 | 64  | 98  | 2.13E-03 |
| cg22956483 | <i>IGF2</i>     | -0.556 | 81  | 81  | 2.13E-03 |
| cg11098259 | <i>AQP9</i>     | -0.215 | 73  | 89  | 2.13E-03 |
| cg12571423 | <i>CCNA1</i>    | -2.449 | 112 | 50  | 2.13E-03 |
| cg21116410 | <i>PEX12</i>    | -5.463 | 40  | 122 | 2.13E-03 |
| cg05790999 | <i>HS1BP3</i>   | -5.817 | 49  | 113 | 2.13E-03 |
| cg10708793 | <i>LGP2</i>     | -5.139 | 97  | 65  | 2.13E-03 |
| cg08090772 | <i>ADHFE1</i>   | -4.592 | 112 | 50  | 2.13E-03 |
| cg10559803 | <i>RALGPS2</i>  | -0.457 | 129 | 33  | 2.13E-03 |
| cg17838765 | <i>ALKBH3</i>   | -6.153 | 76  | 86  | 2.13E-03 |
| cg27144395 | <i>FOXN4</i>    | -4.424 | 98  | 64  | 2.13E-03 |
| cg05637892 | <i>SCFD1</i>    | -4.594 | 92  | 70  | 2.13E-03 |
| cg06719391 | <i>KCNQ1</i>    | -4.161 | 95  | 67  | 2.14E-03 |
| cg21379008 | <i>ATP8B2</i>   | -4.748 | 139 | 23  | 2.14E-03 |
| cg11896345 | <i>SLC43A2</i>  | -5.161 | 88  | 74  | 2.14E-03 |
| cg22103999 | <i>DNAJA3</i>   | -5.031 | 60  | 102 | 2.14E-03 |
| cg11007123 | <i>SPTAN1</i>   | -5.216 | 68  | 94  | 2.14E-03 |
| cg05598246 | <i>MOG</i>      | 0.348  | 88  | 74  | 2.14E-03 |
| cg05098471 | <i>MEIS1</i>    | -5.397 | 86  | 76  | 2.14E-03 |
| cg02515725 | <i>PDLIM3</i>   | -3.250 | 89  | 73  | 2.14E-03 |
| cg05173789 | <i>RPLP0</i>    | -5.484 | 66  | 96  | 2.14E-03 |
| cg14662172 | <i>CPB2</i>     | 1.936  | 29  | 133 | 2.14E-03 |

|            |           |        |     |     |          |
|------------|-----------|--------|-----|-----|----------|
| cg15852879 | ASB6      | -4.966 | 63  | 99  | 2.14E-03 |
| cg27087572 | LSM1      | -3.408 | 128 | 34  | 2.14E-03 |
| cg24946544 | LOC352909 | -4.244 | 60  | 102 | 2.14E-03 |
| cg16950012 | ATG5      | -5.372 | 76  | 86  | 2.15E-03 |
| cg24822446 | ZFAND3    | -5.014 | 33  | 129 | 2.15E-03 |
| cg13184442 | CDC5L     | -3.961 | 68  | 94  | 2.15E-03 |
| cg15688767 | ZNF148    | -3.399 | 70  | 92  | 2.15E-03 |
| cg09617773 | IMPG1     | 1.022  | 62  | 100 | 2.15E-03 |
| cg10976172 | FLJ32130  | -3.707 | 89  | 73  | 2.15E-03 |
| cg17886028 | CCND2     | -4.836 | 126 | 36  | 2.15E-03 |
| cg16950616 | STXBP4    | -2.493 | 59  | 103 | 2.16E-03 |
| cg04834572 | DUSP13    | 3.594  | 54  | 108 | 2.16E-03 |
| cg19896347 | DNAH10    | 2.752  | 37  | 125 | 2.16E-03 |
| cg26713220 | C16orf45  | -5.321 | 80  | 82  | 2.16E-03 |
| cg00136477 | C1QC      | 1.121  | 51  | 111 | 2.16E-03 |
| cg02906238 | TFCP2L1   | -3.327 | 30  | 132 | 2.16E-03 |
| cg02316718 | UBC       | -5.859 | 44  | 118 | 2.16E-03 |
| cg17567317 | POLR2F    | -5.614 | 83  | 79  | 2.16E-03 |
| cg22158956 | UGDH      | -4.644 | 106 | 56  | 2.16E-03 |
| cg07461582 | RINT-1    | -4.960 | 68  | 94  | 2.16E-03 |
| cg19324791 | CEECAM1   | -5.018 | 68  | 94  | 2.16E-03 |
| cg14256814 | POGK      | -4.208 | 78  | 84  | 2.16E-03 |
| cg07974125 | C4orf14   | -5.375 | 90  | 72  | 2.16E-03 |
| cg22101147 | TMEM110   | -4.397 | 105 | 57  | 2.16E-03 |
| cg01651593 | CDC20     | -4.800 | 53  | 109 | 2.17E-03 |
| cg00212549 | SEMA5B    | -3.567 | 65  | 97  | 2.17E-03 |
| cg03652343 | HERC4     | -4.782 | 69  | 93  | 2.17E-03 |
| cg07761912 | TOR1AIP2  | -4.676 | 75  | 87  | 2.17E-03 |
| cg14802310 | TUBA3     | -1.898 | 53  | 99  | 2.17E-03 |
| cg15439078 | MYL3      | 3.029  | 91  | 71  | 2.17E-03 |
| cg27308387 | CTNNBIP1  | -4.410 | 106 | 56  | 2.17E-03 |
| cg06813842 | STRC      | 0.511  | 66  | 96  | 2.17E-03 |
| cg04914305 | MRPL34    | -4.455 | 51  | 111 | 2.17E-03 |
| cg24770850 | PLXND1    | -6.009 | 86  | 76  | 2.17E-03 |
| cg20287640 | IRF1      | -4.001 | 102 | 60  | 2.17E-03 |
| cg22838674 | PROSC     | -5.557 | 59  | 103 | 2.17E-03 |
| cg19093820 | GPR156    | -3.024 | 63  | 99  | 2.17E-03 |
| cg08346269 | BLOC1S1   | -3.915 | 87  | 75  | 2.17E-03 |
| cg11157872 | FLJ11021  | -4.802 | 100 | 62  | 2.17E-03 |
| cg18611847 | RGS16     | -5.058 | 96  | 66  | 2.18E-03 |
| cg17559549 | MAPK7     | -2.557 | 108 | 54  | 2.18E-03 |
| cg07052387 | HIF1A     | -5.102 | 117 | 45  | 2.18E-03 |
| cg17543123 | PLEKHF1   | -3.869 | 31  | 131 | 2.18E-03 |
| cg04794901 | TCP1      | -5.521 | 66  | 96  | 2.19E-03 |
| cg18534730 | CABP5     | 1.532  | 34  | 128 | 2.19E-03 |
| cg10006582 | BBS5      | -4.833 | 35  | 127 | 2.19E-03 |
| cg03740984 | SLC35E1   | -4.456 | 144 | 18  | 2.19E-03 |
| cg06849227 | KCNH6     | 4.082  | 46  | 116 | 2.19E-03 |
| cg25462291 | HEYL      | -4.145 | 94  | 68  | 2.19E-03 |
| cg01297972 | SDCCAG33  | 3.034  | 109 | 53  | 2.19E-03 |
| cg19224837 | GSC       | -5.238 | 101 | 61  | 2.19E-03 |
| cg15166050 | LCTL      | 3.501  | 111 | 51  | 2.19E-03 |
| cg07566050 | PEA15     | 2.153  | 112 | 50  | 2.19E-03 |
| cg00016968 | RHOC      | 0.611  | 36  | 126 | 2.20E-03 |
| cg08500346 | CTSH      | -3.699 | 87  | 75  | 2.20E-03 |

|            |                  |        |     |     |          |
|------------|------------------|--------|-----|-----|----------|
| cg02657721 | <i>SEMA3B</i>    | -2.554 | 79  | 83  | 2.20E-03 |
| cg09420988 | <i>MRPS30</i>    | -5.699 | 34  | 128 | 2.20E-03 |
| cg06831658 | <i>SOCS2</i>     | -4.493 | 125 | 37  | 2.20E-03 |
| cg22022041 | <i>CCR9</i>      | 2.307  | 83  | 79  | 2.20E-03 |
| cg27158143 | <i>EIF3S7</i>    | -4.522 | 62  | 100 | 2.20E-03 |
| cg10624768 | <i>DNAJA1</i>    | -4.375 | 51  | 111 | 2.20E-03 |
| cg14633527 | <i>SCOTIN</i>    | -3.113 | 82  | 80  | 2.20E-03 |
| cg08761447 | <i>PARP11</i>    | -2.789 | 79  | 83  | 2.20E-03 |
| cg12095491 | <i>CAST</i>      | 2.606  | 29  | 133 | 2.20E-03 |
| cg18705067 | <i>FLJ37078</i>  | 3.607  | 124 | 38  | 2.21E-03 |
| cg25537962 | <i>CD109</i>     | -3.869 | 107 | 55  | 2.21E-03 |
| cg03539474 | <i>SLC25A12</i>  | -3.666 | 75  | 87  | 2.21E-03 |
| cg27088655 | <i>FBXL16</i>    | -5.734 | 102 | 60  | 2.21E-03 |
| cg03716942 | <i>GNB1</i>      | -4.544 | 86  | 76  | 2.21E-03 |
| cg01718139 | <i>UNQ3033</i>   | 1.680  | 77  | 85  | 2.21E-03 |
| cg03841029 | <i>MBD1</i>      | -3.864 | 43  | 119 | 2.21E-03 |
| cg01655355 | <i>SLC5A5</i>    | -4.364 | 115 | 47  | 2.21E-03 |
| cg24793265 | <i>CARD9</i>     | 2.345  | 61  | 101 | 2.21E-03 |
| cg07596401 | <i>LHPP</i>      | 0.068  | 92  | 70  | 2.21E-03 |
| cg23404467 | <i>KIR3DL3</i>   | 2.412  | 127 | 35  | 2.21E-03 |
| cg03293882 | <i>ZNF614</i>    | -3.880 | 65  | 96  | 2.21E-03 |
| cg04689061 | <i>PKIA</i>      | -2.960 | 39  | 122 | 2.21E-03 |
| cg13449778 | <i>C1orf76</i>   | -3.290 | 26  | 136 | 2.21E-03 |
| cg12167239 | <i>SLC25A1</i>   | -5.255 | 69  | 93  | 2.21E-03 |
| cg02566518 | <i>FUT11</i>     | -3.855 | 35  | 127 | 2.21E-03 |
| cg00344709 | <i>ANKRD21</i>   | 1.880  | 119 | 43  | 2.21E-03 |
| cg23651728 | <i>BFSP1</i>     | -3.425 | 124 | 38  | 2.21E-03 |
| cg14017991 | <i>CCDC21</i>    | -4.832 | 78  | 84  | 2.21E-03 |
| cg03007010 | <i>SNX26</i>     | -4.214 | 60  | 102 | 2.22E-03 |
| cg00078194 | <i>MDK</i>       | -5.009 | 36  | 126 | 2.22E-03 |
| cg11251086 | <i>DUSP11</i>    | -4.821 | 57  | 105 | 2.22E-03 |
| cg00818693 | <i>TTC14</i>     | -4.656 | 64  | 98  | 2.22E-03 |
| cg16515820 | <i>ZBTB20</i>    | -4.110 | 30  | 132 | 2.22E-03 |
| cg13555884 | <i>CTGLF1</i>    | 3.493  | 118 | 44  | 2.22E-03 |
| cg17814481 | <i>FBP1</i>      | -3.598 | 54  | 108 | 2.23E-03 |
| cg02907300 | <i>TCEB3</i>     | -4.970 | 72  | 90  | 2.23E-03 |
| cg20520365 | <i>C20orf144</i> | 3.489  | 63  | 99  | 2.23E-03 |
| cg23727583 | <i>FDXR</i>      | -4.878 | 55  | 107 | 2.23E-03 |
| cg26580095 | <i>BTBD8</i>     | -1.021 | 72  | 90  | 2.23E-03 |
| cg16028934 | <i>TP53BP2</i>   | -5.069 | 59  | 103 | 2.23E-03 |
| cg03839972 | <i>DGUOK</i>     | -3.468 | 103 | 59  | 2.23E-03 |
| cg18236734 | <i>HTR3E</i>     | -0.688 | 115 | 47  | 2.23E-03 |
| cg01546430 | <i>ITK</i>       | -0.954 | 109 | 53  | 2.23E-03 |
| cg06302803 | <i>MATR3</i>     | -4.581 | 63  | 99  | 2.23E-03 |
| cg26245011 | <i>FLJ13910</i>  | -6.103 | 68  | 94  | 2.23E-03 |
| cg18888595 | <i>OTUD6B</i>    | -5.032 | 49  | 113 | 2.23E-03 |
| cg22007326 | <i>TMED2</i>     | -5.259 | 74  | 88  | 2.23E-03 |
| cg13415850 | <i>C2orf7</i>    | -3.082 | 74  | 88  | 2.24E-03 |
| cg02546521 | <i>ULK1</i>      | -5.068 | 48  | 114 | 2.24E-03 |
| cg19317638 | <i>SFRS16</i>    | -2.158 | 82  | 77  | 2.24E-03 |
| cg17769158 | <i>ODF1</i>      | 3.030  | 111 | 51  | 2.24E-03 |
| cg20218060 | <i>CLK1</i>      | -5.720 | 47  | 115 | 2.24E-03 |
| cg04383012 | <i>PSMD1</i>     | -5.455 | 68  | 94  | 2.24E-03 |
| cg08570521 | <i>TLL1</i>      | -4.143 | 60  | 102 | 2.24E-03 |
| cg21387302 | <i>RFX3</i>      | -4.532 | 117 | 45  | 2.24E-03 |

|            |                 |        |     |     |          |
|------------|-----------------|--------|-----|-----|----------|
| cg24069559 | <i>HNRPL</i>    | -4.650 | 75  | 87  | 2.25E-03 |
| cg06799664 | <i>DNAHL1</i>   | 1.335  | 121 | 41  | 2.25E-03 |
| cg14401454 | <i>C14orf8</i>  | 2.965  | 139 | 23  | 2.25E-03 |
| cg01036148 | <i>RNPEP</i>    | -4.736 | 96  | 66  | 2.25E-03 |
| cg04747322 | <i>SNCAIP</i>   | -2.261 | 108 | 54  | 2.25E-03 |
| cg20556988 | <i>CCL1</i>     | 2.248  | 87  | 75  | 2.25E-03 |
| cg25745343 | <i>PLEKHB2</i>  | -3.681 | 38  | 124 | 2.26E-03 |
| cg03198372 | <i>KREMEN1</i>  | -1.857 | 92  | 70  | 2.26E-03 |
| cg23733753 | <i>CYP46A1</i>  | -4.292 | 42  | 120 | 2.26E-03 |
| cg27462371 | <i>ATXN7</i>    | -4.517 | 105 | 57  | 2.26E-03 |
| cg07457944 | <i>SOCS6</i>    | -4.296 | 74  | 88  | 2.27E-03 |
| cg18875839 | <i>KIF13B</i>   | -4.321 | 70  | 92  | 2.27E-03 |
| cg11957040 | <i>PPP2R1A</i>  | -5.045 | 92  | 70  | 2.27E-03 |
| cg22983885 | <i>C1orf128</i> | -3.843 | 47  | 115 | 2.27E-03 |
| cg08680731 | <i>VPS41</i>    | -4.076 | 88  | 74  | 2.27E-03 |
| cg19844287 | <i>MOCS2</i>    | -4.955 | 58  | 104 | 2.27E-03 |
| cg02632166 | <i>ITM2B</i>    | -5.257 | 104 | 58  | 2.27E-03 |
| cg11080718 | <i>HIGD1A</i>   | -3.038 | 106 | 56  | 2.27E-03 |
| cg23758485 | <i>SMPD3</i>    | -3.569 | 116 | 46  | 2.27E-03 |
| cg14693893 | <i>DYNC1H1</i>  | -4.597 | 101 | 61  | 2.27E-03 |
| cg21035142 | <i>CRYGN</i>    | -2.287 | 98  | 64  | 2.27E-03 |
| cg24974477 | <i>PLA2G12A</i> | -3.938 | 108 | 54  | 2.27E-03 |
| cg24489237 | <i>PBX1</i>     | -3.379 | 47  | 115 | 2.28E-03 |
| cg24817430 | <i>MESDC1</i>   | -5.104 | 58  | 104 | 2.28E-03 |
| cg13245912 | <i>RTN3</i>     | -5.158 | 54  | 108 | 2.28E-03 |
| cg15843217 | <i>PCGF3</i>    | -2.212 | 40  | 122 | 2.28E-03 |
| cg16377872 | <i>SLC1A6</i>   | 1.555  | 140 | 22  | 2.28E-03 |
| cg02686769 | <i>TCP11L2</i>  | -4.934 | 80  | 82  | 2.28E-03 |
| cg26832211 | <i>KRTAP5-9</i> | 1.937  | 73  | 89  | 2.28E-03 |
| cg07047653 | <i>AQP2</i>     | 2.601  | 87  | 75  | 2.28E-03 |
| cg16746462 | <i>LNPEP</i>    | -4.445 | 55  | 107 | 2.28E-03 |
| cg22125922 | <i>ZNF337</i>   | -4.271 | 111 | 51  | 2.28E-03 |
| cg19971804 | <i>MORN2</i>    | -3.951 | 107 | 55  | 2.29E-03 |
| cg11289251 | <i>DUS2L</i>    | -6.114 | 64  | 98  | 2.29E-03 |
| cg09059548 | <i>PHC1</i>     | -4.502 | 110 | 52  | 2.29E-03 |
| cg23430634 | <i>C8orf17</i>  | 2.440  | 57  | 105 | 2.29E-03 |
| cg24912560 | <i>HNRNPG-T</i> | 1.545  | 115 | 47  | 2.29E-03 |
| cg21026663 | <i>HIST1H4D</i> | -5.530 | 84  | 78  | 2.29E-03 |
| cg11462533 | <i>HPCAL4</i>   | -2.082 | 73  | 89  | 2.29E-03 |
| cg26780404 | <i>COL12A1</i>  | -5.462 | 105 | 57  | 2.29E-03 |
| cg05830416 | <i>C9orf100</i> | -4.244 | 47  | 115 | 2.29E-03 |
| cg24405636 | <i>ZNF526</i>   | -3.879 | 72  | 90  | 2.30E-03 |
| cg02276686 | <i>PSMC1</i>    | -4.532 | 80  | 82  | 2.30E-03 |
| cg08233173 | <i>ATP6V0E</i>  | -3.493 | 107 | 55  | 2.30E-03 |
| cg13019092 | <i>PDZK1</i>    | 2.344  | 32  | 130 | 2.30E-03 |
| cg13516796 | <i>ALG1</i>     | -4.658 | 95  | 67  | 2.30E-03 |
| cg04836428 | <i>DTNA</i>     | -3.521 | 52  | 110 | 2.30E-03 |
| cg12438666 | <i>C2orf15</i>  | -3.936 | 62  | 100 | 2.30E-03 |
| cg11095315 | <i>PABPN1</i>   | 2.377  | 114 | 48  | 2.30E-03 |
| cg25168545 | <i>GIMAP1</i>   | -0.833 | 63  | 99  | 2.30E-03 |
| cg18895413 | <i>ALDH4A1</i>  | -5.603 | 103 | 59  | 2.30E-03 |
| cg14125250 | <i>PIK3R2</i>   | -4.173 | 64  | 98  | 2.31E-03 |
| cg13493001 | <i>LCN12</i>    | 1.701  | 93  | 69  | 2.31E-03 |
| cg25929421 | <i>DEDD</i>     | -5.289 | 73  | 89  | 2.31E-03 |
| cg05284582 | <i>DNAJC18</i>  | -5.147 | 79  | 83  | 2.31E-03 |

|            |          |        |     |     |          |
|------------|----------|--------|-----|-----|----------|
| cg26012103 | SOCS1    | -3.146 | 54  | 108 | 2.31E-03 |
| cg20812929 | DHRS4L2  | -1.061 | 69  | 93  | 2.31E-03 |
| cg22424444 | TOLLIP   | 2.135  | 75  | 87  | 2.31E-03 |
| cg22190114 | NALP8    | 3.048  | 83  | 79  | 2.31E-03 |
| cg26685339 | HIVEP1   | -4.966 | 47  | 115 | 2.31E-03 |
| cg20444256 | CKM      | -0.643 | 83  | 79  | 2.32E-03 |
| cg02422694 | HOXB4    | -3.809 | 98  | 64  | 2.32E-03 |
| cg08780378 | EIF3S1   | -4.903 | 94  | 68  | 2.32E-03 |
| cg10578779 | ZBTB37   | -4.100 | 86  | 76  | 2.33E-03 |
| cg15442534 | PDCD10   | -5.276 | 45  | 117 | 2.33E-03 |
| cg26356176 | SNAG1    | -4.269 | 93  | 69  | 2.33E-03 |
| cg01335367 | C12orf34 | -2.463 | 107 | 55  | 2.33E-03 |
| cg01930621 | ZNF649   | -4.207 | 50  | 112 | 2.33E-03 |
| cg21226225 | TXNRD1   | -2.017 | 81  | 81  | 2.33E-03 |
| cg12730424 | BTBD7    | -4.367 | 45  | 117 | 2.33E-03 |
| cg24332422 | APC      | -2.706 | 97  | 65  | 2.33E-03 |
| cg15392792 | DNM2     | -4.771 | 113 | 49  | 2.33E-03 |
| cg18540325 | PRSS3    | -0.353 | 43  | 119 | 2.33E-03 |
| cg14934821 | GPSM1    | 2.637  | 22  | 140 | 2.33E-03 |
| cg19187486 | ARID3B   | -5.439 | 83  | 79  | 2.33E-03 |
| cg12514620 | SSBP3    | -4.497 | 112 | 50  | 2.34E-03 |
| cg00528052 | JARID1B  | -5.624 | 72  | 90  | 2.34E-03 |
| cg02399455 | SRI      | 3.440  | 35  | 127 | 2.34E-03 |
| cg25999486 | TBC1D4   | -5.501 | 37  | 125 | 2.34E-03 |
| cg10819446 | PARD6A   | -4.833 | 50  | 112 | 2.34E-03 |
| cg12687922 | PPM1J    | -4.575 | 69  | 93  | 2.34E-03 |
| cg06323290 | HK1      | 1.500  | 88  | 74  | 2.34E-03 |
| cg13564468 | C6orf192 | -3.828 | 120 | 42  | 2.34E-03 |
| cg04344347 | ADI1     | -5.188 | 95  | 67  | 2.34E-03 |
| cg10972353 | SCD5     | -5.426 | 111 | 51  | 2.34E-03 |
| cg14711201 | SKP2     | -5.484 | 32  | 130 | 2.34E-03 |
| cg18060199 | BCAR3    | -3.912 | 90  | 72  | 2.34E-03 |
| cg20141916 | PLEK2    | -4.924 | 111 | 51  | 2.34E-03 |
| cg13686042 | SBF1     | -4.474 | 67  | 95  | 2.34E-03 |
| cg14550518 | ZNF659   | -4.204 | 84  | 78  | 2.35E-03 |
| cg16406212 | UBXD4    | -4.626 | 46  | 116 | 2.35E-03 |
| cg09649610 | GNG4     | -1.490 | 45  | 117 | 2.35E-03 |
| cg00465284 | LRRTM1   | -4.008 | 83  | 79  | 2.35E-03 |
| cg25887739 | TBC1D8   | 2.821  | 52  | 110 | 2.35E-03 |
| cg26451923 | NUDT5    | -3.632 | 55  | 107 | 2.35E-03 |
| cg22346765 | UNC5CL   | 1.672  | 71  | 91  | 2.35E-03 |
| cg20737712 | TBRG1    | -4.141 | 75  | 87  | 2.35E-03 |
| cg12930920 | KIAA1008 | -4.675 | 122 | 40  | 2.35E-03 |
| cg15582891 | TAAR1    | 0.273  | 130 | 32  | 2.35E-03 |
| cg21144587 | XAB1     | -5.306 | 113 | 49  | 2.35E-03 |
| cg14585160 | ARHGAP1  | -5.319 | 60  | 102 | 2.35E-03 |
| cg04388983 | P2RY2    | -3.831 | 100 | 62  | 2.35E-03 |
| cg03272031 | LOH12CR1 | -5.454 | 48  | 114 | 2.35E-03 |
| cg07071881 | FBXO7    | -4.327 | 131 | 31  | 2.35E-03 |
| cg23520347 | RASSF5   | -4.376 | 55  | 107 | 2.36E-03 |
| cg21872391 | SMNDC1   | -5.224 | 74  | 88  | 2.36E-03 |
| cg13118849 | CSPG3    | 2.727  | 52  | 110 | 2.36E-03 |
| cg27348440 |          | 2.029  | 57  | 105 | 2.36E-03 |
| cg26843008 | RBL1     | -5.365 | 39  | 123 | 2.37E-03 |
| cg26366091 | CHI3L2   | -1.719 | 120 | 42  | 2.37E-03 |

|            |                  |        |     |     |          |
|------------|------------------|--------|-----|-----|----------|
| cg00105470 | <i>C1orf35</i>   | -4.762 | 111 | 51  | 2.37E-03 |
| cg21861211 | <i>ZFYVE26</i>   | -5.108 | 36  | 126 | 2.37E-03 |
| cg20772904 | <i>SHCBP1</i>    | -3.874 | 54  | 108 | 2.37E-03 |
| cg04629269 | <i>Magmas</i>    | -5.032 | 69  | 93  | 2.37E-03 |
| cg07965839 | <i>ZA20D3</i>    | -4.592 | 73  | 89  | 2.38E-03 |
| cg10634217 | <i>MRPL18</i>    | -5.275 | 84  | 78  | 2.38E-03 |
| cg00969446 | <i>CENTA1</i>    | 0.366  | 90  | 72  | 2.38E-03 |
| cg02087637 | <i>PCDHB8</i>    | -2.207 | 65  | 97  | 2.38E-03 |
| cg18901980 | <i>KRT25A</i>    | 1.510  | 116 | 46  | 2.38E-03 |
| cg16192916 | <i>PSME4</i>     | -4.735 | 71  | 91  | 2.38E-03 |
| cg24035962 | <i>NCOA4</i>     | -4.031 | 85  | 77  | 2.38E-03 |
| cg22290566 | <i>LMAN1L</i>    | 1.922  | 93  | 69  | 2.38E-03 |
| cg09842540 | <i>TBC1D17</i>   | -5.859 | 80  | 82  | 2.38E-03 |
| cg27194921 | <i>PXMP4</i>     | -4.273 | 55  | 107 | 2.38E-03 |
| cg07265300 | <i>PFN4</i>      | -4.003 | 65  | 97  | 2.39E-03 |
| cg02198044 | <i>NEDD4</i>     | -3.605 | 37  | 125 | 2.39E-03 |
| cg22628926 | <i>SLC25A11</i>  | -1.473 | 76  | 86  | 2.39E-03 |
| cg04981414 | <i>POMT1</i>     | -4.225 | 101 | 61  | 2.39E-03 |
| cg24832140 | <i>ZNF114</i>    | -3.631 | 105 | 57  | 2.39E-03 |
| cg09910464 | <i>MGC40579</i>  | -5.032 | 64  | 98  | 2.39E-03 |
| cg13846866 | <i>MLH1</i>      | -3.785 | 62  | 100 | 2.39E-03 |
| cg21295467 | <i>LOH11CR2A</i> | -4.935 | 54  | 108 | 2.39E-03 |
| cg14569415 | <i>GMPPA</i>     | -5.358 | 58  | 104 | 2.39E-03 |
| cg00674922 | <i>SATB1</i>     | -5.627 | 94  | 68  | 2.39E-03 |
| cg01053621 | <i>APOA2</i>     | 1.129  | 132 | 30  | 2.39E-03 |
| cg22621695 | <i>DYRK2</i>     | -2.264 | 122 | 40  | 2.40E-03 |
| cg22833027 | <i>CHRD</i>      | -4.342 | 123 | 39  | 2.40E-03 |
| cg20848130 | <i>GJA12</i>     | 0.801  | 84  | 78  | 2.40E-03 |
| cg26853640 | <i>GGN</i>       | -4.504 | 111 | 51  | 2.40E-03 |
| cg09130402 | <i>TXNL1</i>     | -5.109 | 49  | 113 | 2.40E-03 |
| cg14822966 | <i>SLBP</i>      | -3.739 | 89  | 73  | 2.40E-03 |
| cg05193832 | <i>KCNJ1</i>     | 2.227  | 147 | 15  | 2.40E-03 |
| cg03680758 | <i>SLC2A4RG</i>  | -4.928 | 58  | 104 | 2.41E-03 |
| cg15639951 | <i>MAP3K14</i>   | 1.095  | 80  | 82  | 2.41E-03 |
| cg24110916 | <i>SPG21</i>     | -5.028 | 46  | 116 | 2.41E-03 |
| cg26379475 | <i>SH2D1B</i>    | 1.206  | 38  | 124 | 2.41E-03 |
| cg00241355 | <i>GAPDH</i>     | -5.263 | 77  | 85  | 2.41E-03 |
| cg08027001 | <i>SLC30A4</i>   | -5.154 | 55  | 107 | 2.41E-03 |
| cg13928594 | <i>IFT81</i>     | -4.616 | 62  | 100 | 2.41E-03 |
| cg15286372 | <i>LRRC1</i>     | -5.152 | 72  | 90  | 2.41E-03 |
| cg18043455 | <i>SEC61A1</i>   | -4.439 | 96  | 66  | 2.41E-03 |
| cg20833786 | <i>MRGPRX3</i>   | 0.230  | 86  | 76  | 2.41E-03 |
| cg16486059 | <i>C1orf135</i>  | -5.618 | 62  | 100 | 2.41E-03 |
| cg02320454 | <i>GPR150</i>    | -4.463 | 46  | 116 | 2.41E-03 |
| cg05590257 | <i>LOC201164</i> | -5.232 | 144 | 18  | 2.41E-03 |
| cg27304754 | <i>CALB2</i>     | -2.348 | 111 | 51  | 2.42E-03 |
| cg12706983 | <i>ZNF435</i>    | -3.638 | 48  | 114 | 2.42E-03 |
| cg15462232 | <i>FOXD3</i>     | -3.959 | 115 | 47  | 2.42E-03 |
| cg16512727 | <i>C12orf4</i>   | -0.498 | 68  | 94  | 2.42E-03 |
| cg04127255 | <i>PSG2</i>      | 3.176  | 125 | 37  | 2.42E-03 |
| cg11827595 | <i>C3orf10</i>   | -3.657 | 55  | 107 | 2.42E-03 |
| cg13794888 | <i>RNUT1</i>     | -4.280 | 83  | 79  | 2.42E-03 |
| cg14176475 | <i>TTF1</i>      | -4.084 | 43  | 119 | 2.42E-03 |
| cg16899306 | <i>HLA-DQB2</i>  | 1.649  | 61  | 98  | 2.42E-03 |
| cg13285447 | <i>NUMBL</i>     | -5.042 | 85  | 77  | 2.43E-03 |

|            |                  |        |     |     |          |
|------------|------------------|--------|-----|-----|----------|
| cg17887537 | <i>RRAGA</i>     | -4.513 | 49  | 113 | 2.43E-03 |
| cg26239051 | <i>EHBP1</i>     | -5.201 | 71  | 91  | 2.43E-03 |
| cg07308943 | <i>FLJ20628</i>  | -5.057 | 39  | 123 | 2.43E-03 |
| cg14515483 | <i>SOD2</i>      | -5.920 | 124 | 38  | 2.43E-03 |
| cg26228569 | <i>CRSP8</i>     | -4.402 | 58  | 104 | 2.43E-03 |
| cg06193397 | <i>ENPP2</i>     | -2.908 | 110 | 52  | 2.43E-03 |
| cg11164400 | <i>PPP1R9A</i>   | -1.735 | 92  | 70  | 2.43E-03 |
| cg17639290 | <i>TIMM8B</i>    | -4.602 | 89  | 73  | 2.44E-03 |
| cg16267491 | <i>H2AFZ</i>     | -4.900 | 35  | 127 | 2.44E-03 |
| cg03651573 | <i>TRIM28</i>    | -4.068 | 52  | 110 | 2.44E-03 |
| cg00597076 | <i>MYO1C</i>     | 0.474  | 78  | 84  | 2.44E-03 |
| cg11913104 | <i>RAD23A</i>    | -5.130 | 89  | 73  | 2.44E-03 |
| cg00728317 | <i>MT1F</i>      | -3.349 | 124 | 38  | 2.44E-03 |
| cg06279414 | <i>TRIP11</i>    | -4.904 | 97  | 65  | 2.44E-03 |
| cg17260725 | <i>CCNB2</i>     | -4.544 | 31  | 131 | 2.44E-03 |
| cg25560840 | <i>KIAA0427</i>  | -5.353 | 87  | 75  | 2.44E-03 |
| cg15215114 | <i>C17orf61</i>  | -5.255 | 85  | 77  | 2.44E-03 |
| cg19548738 | <i>KIAA0738</i>  | -4.647 | 85  | 77  | 2.44E-03 |
| cg24903794 | <i>EPRS</i>      | -5.176 | 69  | 93  | 2.44E-03 |
| cg16761041 | <i>C9orf100S</i> | -3.791 | 99  | 63  | 2.45E-03 |
| cg22154562 | <i>HRBL</i>      | -6.465 | 67  | 95  | 2.45E-03 |
| cg04351979 | <i>CTXN1</i>     | -5.583 | 37  | 125 | 2.45E-03 |
| cg05368089 | <i>PFDN5</i>     | -4.760 | 106 | 56  | 2.45E-03 |
| cg24142014 | <i>PCGF1</i>     | -4.111 | 47  | 115 | 2.45E-03 |
| cg11388238 | <i>KCTD18</i>    | -3.969 | 56  | 106 | 2.45E-03 |
| cg13560548 | <i>C3orf24</i>   | 1.738  | 102 | 60  | 2.45E-03 |
| cg01784199 | <i>DNAJB4</i>    | -3.944 | 115 | 47  | 2.45E-03 |
| cg27003571 | <i>GTDC1</i>     | 1.352  | 122 | 40  | 2.45E-03 |
| cg20582984 | <i>GNAS</i>      | 1.242  | 25  | 137 | 2.45E-03 |
| cg14463304 | <i>DDX47</i>     | -1.139 | 85  | 77  | 2.45E-03 |
| cg12741420 | <i>IRF4</i>      | -4.270 | 94  | 68  | 2.45E-03 |
| cg02360836 | <i>SMARCD2</i>   | -4.720 | 96  | 66  | 2.45E-03 |
| cg06707886 | <i>C7orf20</i>   | -5.551 | 55  | 107 | 2.45E-03 |
| cg18477315 | <i>GOLGA5</i>    | -4.504 | 77  | 85  | 2.46E-03 |
| cg22138461 | <i>FLJ13984</i>  | -5.080 | 79  | 83  | 2.46E-03 |
| cg00496170 | <i>ATP6V1D</i>   | -5.813 | 105 | 57  | 2.46E-03 |
| cg04576203 | <i>AUP1</i>      | -5.181 | 98  | 64  | 2.46E-03 |
| cg01206970 | <i>PPFIA3</i>    | 4.519  | 91  | 71  | 2.46E-03 |
| cg26043391 | <i>FBXO28</i>    | -3.509 | 104 | 58  | 2.46E-03 |
| cg18220284 | <i>TAF5L</i>     | -4.581 | 48  | 114 | 2.46E-03 |
| cg09645888 | <i>ME3</i>       | -3.832 | 73  | 89  | 2.46E-03 |
| cg12179044 | <i>GCN1L1</i>    | -5.047 | 72  | 90  | 2.46E-03 |
| cg07973390 | <i>CARF</i>      | -4.488 | 66  | 96  | 2.47E-03 |
| cg20624391 | <i>BVES</i>      | -2.061 | 115 | 47  | 2.47E-03 |
| cg10137155 | <i>KBTBD8</i>    | -5.103 | 65  | 97  | 2.47E-03 |
| cg07281688 | <i>PTGES3</i>    | -5.808 | 40  | 122 | 2.47E-03 |
| cg04878727 | <i>ZNF306</i>    | -3.496 | 28  | 134 | 2.47E-03 |
| cg11025793 | <i>STX10</i>     | -2.278 | 19  | 140 | 2.47E-03 |
| cg22578610 | <i>FAM89B</i>    | 3.010  | 93  | 69  | 2.47E-03 |
| cg08195505 | <i>ETV5</i>      | -4.404 | 76  | 86  | 2.47E-03 |
| cg07603484 | <i>IL4I1</i>     | 2.738  | 65  | 97  | 2.48E-03 |
| cg11591325 | <i>F2R</i>       | -4.842 | 61  | 101 | 2.48E-03 |
| cg25955969 | <i>DPH2</i>      | -5.116 | 73  | 89  | 2.48E-03 |
| cg04283938 | <i>44077</i>     | -3.158 | 81  | 81  | 2.49E-03 |
| cg08786003 | <i>FCRL3</i>     | 1.030  | 48  | 114 | 2.49E-03 |

|            |                  |        |     |     |          |
|------------|------------------|--------|-----|-----|----------|
| cg20586531 | <i>PLSCR1</i>    | 1.975  | 63  | 99  | 2.49E-03 |
| cg21250296 | <i>HIST1H2BB</i> | -4.303 | 69  | 93  | 2.49E-03 |
| cg07918509 | <i>ICAM2</i>     | 0.151  | 47  | 115 | 2.49E-03 |
| cg01795161 | <i>MCFP</i>      | -0.847 | 32  | 127 | 2.49E-03 |
| cg06305312 | <i>PQLC2</i>     | -4.424 | 64  | 98  | 2.49E-03 |
| cg06816063 | <i>RAB8A</i>     | -5.788 | 111 | 51  | 2.49E-03 |
| cg24356289 | <i>C12orf22</i>  | -5.157 | 64  | 98  | 2.49E-03 |
| cg20375690 | <i>C1orf126</i>  | -5.032 | 114 | 48  | 2.49E-03 |
| cg11279021 | <i>ETV1</i>      | -2.839 | 79  | 83  | 2.50E-03 |
| cg03338959 | <i>PBEF1</i>     | -3.849 | 54  | 108 | 2.50E-03 |
| cg18445047 | <i>MGC26885</i>  | -4.257 | 97  | 65  | 2.50E-03 |
| cg01346718 | <i>CSNK1E</i>    | -0.990 | 128 | 34  | 2.50E-03 |
| cg07294774 | <i>DIO2</i>      | -3.378 | 69  | 93  | 2.50E-03 |
| cg25559243 | <i>AAMP</i>      | -4.768 | 89  | 73  | 2.50E-03 |
| cg23141333 | <i>DENND2C</i>   | -4.660 | 99  | 63  | 2.50E-03 |
| cg23864823 | <i>MRPL9</i>     | -4.744 | 103 | 59  | 2.50E-03 |
| cg07535475 | <i>SEC61B</i>    | -4.277 | 62  | 100 | 2.50E-03 |
| cg11429632 | <i>RAB14</i>     | -3.882 | 39  | 123 | 2.50E-03 |
| cg04296434 | <i>Kua</i>       | -3.435 | 48  | 114 | 2.50E-03 |
| cg09539408 | <i>STRN3</i>     | -5.089 | 119 | 43  | 2.50E-03 |
| cg23078294 | <i>RSBN1</i>     | -5.596 | 62  | 100 | 2.50E-03 |
| cg17333479 | <i>ZNF571</i>    | -5.180 | 86  | 76  | 2.50E-03 |
| cg00577464 | <i>SHH</i>       | -4.740 | 92  | 70  | 2.50E-03 |
| cg09847234 | <i>NCK1</i>      | -2.109 | 74  | 88  | 2.50E-03 |
| cg21120249 | <i>FLJ36268</i>  | 0.749  | 50  | 112 | 2.50E-03 |
| cg10977115 | <i>CRTAM</i>     | 1.276  | 54  | 108 | 2.50E-03 |
| cg13426503 | <i>RBL2</i>      | -5.111 | 58  | 104 | 2.50E-03 |
| cg10324224 | <i>TTC13</i>     | 1.662  | 32  | 130 | 2.51E-03 |
| cg16219122 | <i>ABCB1</i>     | -0.260 | 105 | 57  | 2.51E-03 |
| cg13916322 | <i>HRASLS3</i>   | -4.587 | 107 | 55  | 2.51E-03 |
| cg14592099 | <i>PCDHB13</i>   | -3.289 | 99  | 63  | 2.51E-03 |
| cg03453449 | <i>USP44</i>     | 1.188  | 80  | 82  | 2.51E-03 |
| cg01816336 | <i>MINPP1</i>    | -5.830 | 56  | 106 | 2.51E-03 |
| cg22054164 | <i>ECE1</i>      | 0.417  | 46  | 116 | 2.51E-03 |
| cg02635865 | <i>RAB22A</i>    | -4.114 | 139 | 23  | 2.51E-03 |
| cg01873645 | <i>C9orf85</i>   | -5.118 | 68  | 94  | 2.52E-03 |
| cg00332745 | <i>NOL3</i>      | -5.611 | 108 | 54  | 2.52E-03 |
| cg03451296 | <i>CRIP2</i>     | -5.500 | 34  | 128 | 2.52E-03 |
| cg06894381 | <i>SLC35D1</i>   | -4.818 | 58  | 104 | 2.52E-03 |
| cg08812504 | <i>QSCN6</i>     | -5.067 | 89  | 73  | 2.52E-03 |
| cg11096837 | <i>CGI-96</i>    | -4.929 | 24  | 138 | 2.52E-03 |
| cg03695693 | <i>ITGB1BP3</i>  | -3.255 | 124 | 38  | 2.52E-03 |
| cg07341907 | <i>UNC13B</i>    | -5.043 | 70  | 92  | 2.52E-03 |
| cg23855392 | <i>MTHFS</i>     | -3.341 | 84  | 78  | 2.53E-03 |
| cg23494853 | <i>C2orf25</i>   | -4.407 | 48  | 114 | 2.53E-03 |
| cg06044900 | <i>GNAS</i>      | -4.535 | 105 | 57  | 2.53E-03 |
| cg22799850 | <i>FBXL13</i>    | -2.916 | 91  | 71  | 2.53E-03 |
| cg00449941 | <i>SPAG5</i>     | -4.994 | 114 | 48  | 2.53E-03 |
| cg02361363 | <i>ST3GAL3</i>   | -4.905 | 48  | 114 | 2.53E-03 |
| cg04732193 | <i>HSD11B1</i>   | 2.226  | 146 | 16  | 2.53E-03 |
| cg12785689 | <i>ITGB4BP</i>   | -3.803 | 111 | 51  | 2.53E-03 |
| cg20787196 | <i>ITPR2</i>     | -3.806 | 90  | 72  | 2.53E-03 |
| cg19635869 | <i>RRAGD</i>     | -4.275 | 90  | 72  | 2.53E-03 |
| cg19167673 | <i>PDGFB</i>     | -4.599 | 83  | 79  | 2.54E-03 |
| cg01852328 | <i>LOC221955</i> | -3.940 | 70  | 92  | 2.54E-03 |

|            |                       |        |     |     |          |
|------------|-----------------------|--------|-----|-----|----------|
| cg25735280 | <i>PDZK3</i>          | -5.415 | 107 | 55  | 2.54E-03 |
| cg19278809 | <i>KIAA0232</i>       | -5.192 | 68  | 94  | 2.54E-03 |
| cg21166999 | <i>ROS1</i>           | 0.941  | 114 | 48  | 2.54E-03 |
| cg15443822 | <i>ATP2A3</i>         | -4.289 | 120 | 42  | 2.54E-03 |
| cg11523020 | <i>UPK3A</i>          | -1.092 | 113 | 49  | 2.54E-03 |
| cg13060997 | <i>CCNA1</i>          | -4.843 | 76  | 86  | 2.54E-03 |
| cg02284889 | <i>PPME1</i>          | -4.492 | 91  | 71  | 2.54E-03 |
| cg07636178 | <i>HIST1H3C</i>       | -5.163 | 53  | 109 | 2.55E-03 |
| cg09294589 | <i>CRTAP</i>          | -4.312 | 112 | 50  | 2.55E-03 |
| cg17045009 | <i>VCPIP1</i>         | -4.155 | 55  | 107 | 2.55E-03 |
| cg18226566 | <i>NEDD9</i>          | -3.270 | 91  | 71  | 2.55E-03 |
| cg01389761 | <i>TERC</i>           | -4.295 | 99  | 63  | 2.55E-03 |
| cg13031679 | <i>FLJ10560</i>       | -4.577 | 48  | 114 | 2.55E-03 |
| cg13668129 | <i>HNRPUL1</i>        | -2.853 | 59  | 103 | 2.55E-03 |
| cg22988566 | <i>WFDC10B</i>        | 2.342  | 63  | 99  | 2.55E-03 |
| cg01425405 | <i>DLX3</i>           | -3.712 | 81  | 81  | 2.56E-03 |
| cg26571739 | <i>VAV1</i>           | -0.337 | 20  | 142 | 2.56E-03 |
| cg07777378 | <i>GRN</i>            | -4.719 | 86  | 76  | 2.56E-03 |
| cg08853659 | <i>CLSTN2</i>         | -4.452 | 48  | 114 | 2.56E-03 |
| cg20839149 | <i>SH2D2A</i>         | -1.460 | 77  | 85  | 2.56E-03 |
| cg17100200 | <i>GUCA2B</i>         | 3.282  | 60  | 102 | 2.56E-03 |
| cg10174864 | <i>FANCL</i>          | -3.812 | 43  | 119 | 2.57E-03 |
| cg03897136 | <i>HOOK1</i>          | -5.111 | 106 | 56  | 2.57E-03 |
| cg11688990 | <i>CEP76</i>          | 1.296  | 114 | 48  | 2.57E-03 |
| cg02870945 | <i>REEP1</i>          | -2.038 | 56  | 106 | 2.57E-03 |
| cg02981853 | <i>ARHGEF18</i>       | 1.055  | 136 | 26  | 2.57E-03 |
| cg10211877 | <i>PDRG1</i>          | -5.461 | 94  | 68  | 2.58E-03 |
| cg01357116 | <i>ATOH1</i>          | -3.590 | 85  | 77  | 2.58E-03 |
| cg01146980 | <i>DNAJA5</i>         | -5.307 | 28  | 134 | 2.58E-03 |
| cg15468095 | <i>PYCARD</i>         | -2.391 | 89  | 73  | 2.58E-03 |
| cg20468883 | <i>BNIP2</i>          | -1.319 | 60  | 102 | 2.58E-03 |
| cg10375110 | <i>CHRNA9</i>         | 1.033  | 80  | 82  | 2.58E-03 |
| cg09658438 | <i>CS</i>             | -4.053 | 59  | 103 | 2.58E-03 |
| cg00897329 | <i>LACE1</i>          | -4.577 | 88  | 74  | 2.59E-03 |
| cg22807700 | <i>DNTTIP2</i>        | 1.225  | 121 | 41  | 2.59E-03 |
| cg08067268 | <i>HADHB</i>          | -2.555 | 105 | 52  | 2.59E-03 |
| cg01795697 | <i>DDX5</i>           | -4.493 | 36  | 126 | 2.59E-03 |
| cg18212039 | <i>EXTL1</i>          | 1.939  | 75  | 87  | 2.59E-03 |
| cg20687462 | <i>MGC10992</i>       | -5.014 | 33  | 129 | 2.59E-03 |
| cg04021421 | <i>FANCC</i>          | 3.149  | 106 | 56  | 2.59E-03 |
| cg13823701 | <i>TNXB</i>           | -0.064 | 118 | 44  | 2.59E-03 |
| cg24107581 | <i>POLR3B</i>         | -4.083 | 58  | 104 | 2.59E-03 |
| cg06717231 | <i>ZNF559</i>         | -6.359 | 95  | 67  | 2.59E-03 |
| cg00121640 | <i>ASTN2</i>          | -3.179 | 85  | 77  | 2.60E-03 |
| cg04765277 | <i>FLJ45983</i>       | -1.483 | 107 | 55  | 2.60E-03 |
| cg03199651 | <i>MSX1</i>           | -3.807 | 69  | 93  | 2.60E-03 |
| cg12639234 | <i>NAT2</i>           | 0.554  | 72  | 90  | 2.60E-03 |
| cg16500334 | <i>SUMO3</i>          | -3.417 | 73  | 89  | 2.60E-03 |
| cg23996241 | <i>AP2B1</i>          | -4.375 | 86  | 76  | 2.60E-03 |
| cg15160312 | <i>DLG1</i>           | -5.733 | 90  | 72  | 2.60E-03 |
| cg04565661 | <i>SEMA5B</i>         | -5.339 | 55  | 107 | 2.60E-03 |
| cg10731022 | <i>EIF4EBP3</i>       | -5.778 | 57  | 105 | 2.60E-03 |
| cg09837648 | <i>PLXNB1</i>         | 1.447  | 87  | 75  | 2.60E-03 |
| cg05501682 | <i>DKFZp686I1521i</i> | -3.538 | 80  | 82  | 2.60E-03 |
| cg08822227 | <i>SH3BP2</i>         | -3.492 | 111 | 51  | 2.60E-03 |

|            |                  |        |     |     |          |
|------------|------------------|--------|-----|-----|----------|
| cg14012294 | <i>BTF3</i>      | -4.026 | 72  | 90  | 2.61E-03 |
| cg23912823 | <i>NAB2</i>      | -5.153 | 133 | 29  | 2.61E-03 |
| cg13214349 | <i>HBP1</i>      | -6.053 | 53  | 109 | 2.61E-03 |
| cg13828871 | <i>MYST1</i>     | -4.092 | 34  | 128 | 2.61E-03 |
| cg20697204 | <i>FLJ40172</i>  | 1.085  | 124 | 38  | 2.61E-03 |
| cg07441272 | <i>RPL39L</i>    | -4.774 | 55  | 106 | 2.61E-03 |
| cg25041148 | <i>HKR2</i>      | -6.096 | 117 | 45  | 2.61E-03 |
| cg09584711 | <i>HPR</i>       | 0.154  | 36  | 126 | 2.61E-03 |
| cg14823162 | <i>POU3F2</i>    | -3.961 | 81  | 81  | 2.61E-03 |
| cg25554036 | <i>WFS1</i>      | -1.828 | 25  | 137 | 2.62E-03 |
| cg11454415 | <i>TOMM34</i>    | -4.482 | 100 | 62  | 2.62E-03 |
| cg08364102 | <i>OSBPL2</i>    | -2.506 | 104 | 58  | 2.62E-03 |
| cg09978128 | <i>NDEL1</i>     | -5.929 | 62  | 100 | 2.62E-03 |
| cg27541515 | <i>ZNF235</i>    | -3.876 | 114 | 48  | 2.62E-03 |
| cg27394486 | <i>C15orf2</i>   | 2.297  | 104 | 58  | 2.62E-03 |
| cg08093278 | <i>RANBP3</i>    | -5.902 | 37  | 125 | 2.62E-03 |
| cg16521028 | <i>GLIPR1</i>    | -0.984 | 88  | 74  | 2.62E-03 |
| cg11249173 | <i>HERV-FRD</i>  | 0.009  | 116 | 46  | 2.63E-03 |
| cg01644850 | <i>ZNF551</i>    | -3.910 | 60  | 102 | 2.63E-03 |
| cg18119609 | <i>MDM4</i>      | -4.385 | 52  | 110 | 2.63E-03 |
| cg06291595 | <i>NPC2</i>      | -4.155 | 101 | 61  | 2.63E-03 |
| cg02192855 | <i>HIST1H2BI</i> | -4.201 | 35  | 127 | 2.64E-03 |
| cg19906926 | <i>KLHL5</i>     | -2.755 | 62  | 99  | 2.64E-03 |
| cg27352063 | <i>PPIF</i>      | -5.494 | 65  | 97  | 2.64E-03 |
| cg05038209 | <i>MAP1LC3B</i>  | -4.760 | 61  | 101 | 2.64E-03 |
| cg13724288 | <i>VPS13A</i>    | -4.638 | 35  | 127 | 2.64E-03 |
| cg21399198 | <i>FBXL13</i>    | -4.798 | 43  | 119 | 2.65E-03 |
| cg25356214 | <i>POU6F1</i>    | -3.697 | 110 | 52  | 2.65E-03 |
| cg15384599 | <i>SETMAR</i>    | -4.296 | 78  | 84  | 2.66E-03 |
| cg09329496 | <i>NARG1</i>     | -5.537 | 47  | 115 | 2.66E-03 |
| cg05243804 | <i>FECH</i>      | -4.620 | 120 | 42  | 2.66E-03 |
| cg10521267 | <i>ZNF684</i>    | -4.036 | 37  | 125 | 2.66E-03 |
| cg05354432 | <i>LEF1</i>      | -4.412 | 80  | 82  | 2.66E-03 |
| cg19853494 | <i>SELL</i>      | -1.136 | 45  | 117 | 2.66E-03 |
| cg00532890 | <i>PBX1</i>      | -4.717 | 73  | 89  | 2.66E-03 |
| cg18618964 | <i>PPP3R1</i>    | -4.713 | 61  | 101 | 2.66E-03 |
| cg24056562 | <i>RNASEH2A</i>  | -4.888 | 115 | 47  | 2.67E-03 |
| cg04419707 | <i>RPL3</i>      | -4.360 | 50  | 112 | 2.67E-03 |
| cg25906332 | <i>SLC25A29</i>  | -5.248 | 46  | 116 | 2.67E-03 |
| cg00528967 | <i>STK24</i>     | -5.634 | 38  | 124 | 2.67E-03 |
| cg03213216 | <i>FLJ40125</i>  | -4.030 | 43  | 119 | 2.67E-03 |
| cg08491964 | <i>TCF4</i>      | -2.795 | 108 | 54  | 2.67E-03 |
| cg11227541 | <i>GNG5</i>      | -4.658 | 67  | 95  | 2.67E-03 |
| cg13557178 | <i>EFHA1</i>     | -5.335 | 55  | 107 | 2.67E-03 |
| cg26099316 | <i>ITIH3</i>     | 1.211  | 88  | 74  | 2.67E-03 |
| cg11465163 | <i>DIRAS3</i>    | 0.291  | 78  | 84  | 2.67E-03 |
| cg02033116 | <i>GPATC1</i>    | -4.154 | 88  | 74  | 2.67E-03 |
| cg01169726 | <i>DLX5</i>      | -3.069 | 112 | 50  | 2.67E-03 |
| cg15532088 | <i>C17orf66</i>  | 2.217  | 68  | 94  | 2.67E-03 |
| cg25707005 | <i>DNAJC18</i>   | -3.145 | 73  | 89  | 2.67E-03 |
| cg16249454 | <i>CXCL2</i>     | -5.238 | 109 | 53  | 2.68E-03 |
| cg02756845 | <i>MAPK8IP2</i>  | -2.218 | 82  | 80  | 2.68E-03 |
| cg05815906 | <i>RAB33B</i>    | -4.188 | 144 | 18  | 2.68E-03 |
| cg20229788 | <i>GCKR</i>      | -2.436 | 75  | 87  | 2.68E-03 |
| cg16525761 | <i>RPL34</i>     | -4.041 | 122 | 40  | 2.68E-03 |

|            |                   |        |     |     |          |
|------------|-------------------|--------|-----|-----|----------|
| cg06418184 | <i>DCTN3</i>      | -4.260 | 95  | 67  | 2.68E-03 |
| cg15065896 | <i>GOLGA4</i>     | -4.449 | 99  | 63  | 2.68E-03 |
| cg18432384 | <i>FLJ32771</i>   | 2.683  | 62  | 100 | 2.68E-03 |
| cg11159727 | <i>MTERF</i>      | -2.824 | 42  | 120 | 2.69E-03 |
| cg11848539 | <i>TNFRSF21</i>   | -5.534 | 65  | 97  | 2.69E-03 |
| cg22646937 | <i>KCNMB1</i>     | -0.374 | 64  | 98  | 2.69E-03 |
| cg04316770 | <i>RUTBC3</i>     | -3.520 | 41  | 121 | 2.69E-03 |
| cg22392708 | <i>KRT23</i>      | -1.672 | 108 | 54  | 2.69E-03 |
| cg13673779 | <i>RKHD2</i>      | -5.117 | 55  | 107 | 2.69E-03 |
| cg15070798 | <i>WDR24</i>      | -5.023 | 63  | 99  | 2.69E-03 |
| cg05402265 | <i>ICK</i>        | -4.334 | 120 | 42  | 2.69E-03 |
| cg10046620 | <i>HIST1H2AI</i>  | -3.344 | 82  | 80  | 2.69E-03 |
| cg13634678 | <i>TM2D3</i>      | -4.811 | 122 | 40  | 2.69E-03 |
| cg10316381 | <i>SNX10</i>      | -5.252 | 123 | 39  | 2.69E-03 |
| cg25481253 | <i>TAS2R38</i>    | -1.219 | 87  | 73  | 2.69E-03 |
| cg05674444 | <i>C21orf99</i>   | -1.546 | 83  | 79  | 2.69E-03 |
| cg12683641 | <i>KLK14</i>      | 2.924  | 57  | 105 | 2.69E-03 |
| cg09462575 | <i>PI3</i>        | -0.846 | 58  | 104 | 2.69E-03 |
| cg20824576 | <i>CD47</i>       | -5.540 | 41  | 121 | 2.70E-03 |
| cg06545845 | <i>ARL8A</i>      | -4.711 | 63  | 99  | 2.70E-03 |
| cg06276653 | <i>C8ORFK32</i>   | 2.167  | 107 | 55  | 2.70E-03 |
| cg06475327 | <i>CEACAM8</i>    | 3.815  | 96  | 66  | 2.70E-03 |
| cg09620798 | <i>UBE1C</i>      | -4.020 | 71  | 91  | 2.70E-03 |
| cg26710722 | <i>COL9A2</i>     | -4.137 | 78  | 84  | 2.70E-03 |
| cg00915289 | <i>CKS1B</i>      | -5.520 | 65  | 97  | 2.70E-03 |
| cg14296129 | <i>RAB5B</i>      | -4.262 | 107 | 55  | 2.70E-03 |
| cg04790129 | <i>ITGB2</i>      | 0.264  | 42  | 120 | 2.71E-03 |
| cg00995152 | <i>DAB2IP</i>     | 0.525  | 64  | 98  | 2.71E-03 |
| cg06539804 | <i>CPXM</i>       | -4.809 | 48  | 114 | 2.71E-03 |
| cg25824330 | <i>MRPS18A</i>    | -5.853 | 67  | 95  | 2.71E-03 |
| cg24008892 | <i>PMF1</i>       | 1.994  | 43  | 119 | 2.71E-03 |
| cg02719634 | <i>SLC22A18AS</i> | 1.927  | 111 | 51  | 2.71E-03 |
| cg03591238 | <i>ZNHIT2</i>     | -2.246 | 73  | 89  | 2.71E-03 |
| cg06458239 | <i>ZNF549</i>     | -1.562 | 30  | 132 | 2.72E-03 |
| cg23248452 | <i>TAS2R1</i>     | 0.526  | 36  | 126 | 2.72E-03 |
| cg03682823 | <i>SGCE</i>       | -0.270 | 126 | 36  | 2.72E-03 |
| cg04345475 | <i>FXC1</i>       | 2.550  | 106 | 56  | 2.72E-03 |
| cg07608333 | <i>CD209</i>      | 0.198  | 48  | 114 | 2.72E-03 |
| cg03856723 | <i>PRKACA</i>     | -3.639 | 48  | 114 | 2.72E-03 |
| cg08002996 | <i>SOCS2</i>      | -4.230 | 76  | 86  | 2.72E-03 |
| cg12684360 | <i>KPNA3</i>      | -4.187 | 44  | 118 | 2.72E-03 |
| cg12884406 | <i>COL11A1</i>    | -2.060 | 75  | 87  | 2.72E-03 |
| cg15264303 | <i>LRRC23</i>     | -2.559 | 80  | 82  | 2.72E-03 |
| cg14311811 | <i>DSG2</i>       | -4.474 | 97  | 65  | 2.72E-03 |
| cg16225441 | <i>BECN1</i>      | -2.284 | 91  | 71  | 2.72E-03 |
| cg17422427 | <i>RNPEPL1</i>    | -4.630 | 70  | 92  | 2.72E-03 |
| cg19863003 | <i>REEP5</i>      | -4.674 | 121 | 41  | 2.72E-03 |
| cg11814446 | <i>LEMD3</i>      | -4.226 | 121 | 41  | 2.72E-03 |
| cg19709058 | <i>MGC43122</i>   | -4.627 | 68  | 94  | 2.73E-03 |
| cg02659086 | <i>GSTP1</i>      | -4.864 | 65  | 97  | 2.73E-03 |
| cg20009671 | <i>YY1</i>        | -5.880 | 73  | 89  | 2.73E-03 |
| cg15153383 | <i>KATNB1</i>     | -4.035 | 51  | 111 | 2.73E-03 |
| cg20977411 | <i>PMVK</i>       | -4.491 | 123 | 39  | 2.73E-03 |
| cg23310538 | <i>PLEKHA9</i>    | -4.684 | 98  | 64  | 2.73E-03 |
| cg19872681 | <i>SLC7A7</i>     | 1.032  | 102 | 60  | 2.74E-03 |

|            |                  |        |     |     |          |
|------------|------------------|--------|-----|-----|----------|
| cg23540651 | <i>GBP3</i>      | 1.933  | 45  | 117 | 2.74E-03 |
| cg10007262 | <i>RELN</i>      | -3.311 | 96  | 66  | 2.74E-03 |
| cg15060177 | <i>SACM1L</i>    | -5.003 | 39  | 123 | 2.74E-03 |
| cg17122311 | <i>IL27</i>      | 1.354  | 96  | 66  | 2.74E-03 |
| cg22034555 | <i>DHX36</i>     | -4.507 | 77  | 85  | 2.74E-03 |
| cg22637507 | <i>ALKBH3</i>    | -4.081 | 78  | 84  | 2.74E-03 |
| cg21518938 | <i>RBBP8</i>     | -5.353 | 76  | 86  | 2.74E-03 |
| cg22940988 | <i>IQCH</i>      | 1.746  | 141 | 21  | 2.74E-03 |
| cg02987163 | <i>DUSP14</i>    | -3.931 | 79  | 83  | 2.74E-03 |
| cg23651356 | <i>RGS17</i>     | -0.693 | 75  | 87  | 2.74E-03 |
| cg22084336 | <i>UBP1</i>      | -4.725 | 36  | 126 | 2.74E-03 |
| cg25457331 | <i>GMPR</i>      | -3.893 | 42  | 120 | 2.74E-03 |
| cg16539981 | <i>TEAD2</i>     | -3.714 | 93  | 69  | 2.74E-03 |
| cg11906718 | <i>RNF19</i>     | -2.147 | 102 | 60  | 2.75E-03 |
| cg06233503 | <i>KCNQ1</i>     | -2.094 | 52  | 110 | 2.75E-03 |
| cg17977362 | <i>FLJ45964</i>  | 2.098  | 43  | 119 | 2.75E-03 |
| cg07595113 | <i>MYBL1</i>     | -4.139 | 96  | 66  | 2.75E-03 |
| cg11481720 | <i>FLJ90396</i>  | -4.295 | 109 | 53  | 2.75E-03 |
| cg10207787 | <i>PPP2R2A</i>   | 2.975  | 76  | 86  | 2.75E-03 |
| cg21746459 | <i>MRPL50</i>    | -5.689 | 66  | 96  | 2.75E-03 |
| cg02367951 | <i>HIST1H2AK</i> | -1.496 | 133 | 29  | 2.75E-03 |
| cg19133618 | <i>CDKN2B</i>    | -5.039 | 114 | 48  | 2.75E-03 |
| cg25301180 | <i>CAST1</i>     | -4.468 | 69  | 93  | 2.75E-03 |
| cg15687659 | <i>RAB7</i>      | -5.018 | 63  | 99  | 2.75E-03 |
| cg10851775 | <i>SLC26A7</i>   | 1.778  | 110 | 52  | 2.75E-03 |
| cg23889771 | <i>CPSF3</i>     | -5.019 | 79  | 83  | 2.75E-03 |
| cg24633242 | <i>FTS</i>       | -4.001 | 44  | 118 | 2.75E-03 |
| cg25322211 | <i>TRIM65</i>    | -5.217 | 94  | 68  | 2.76E-03 |
| cg06069731 | <i>HIST1H2BB</i> | -3.989 | 23  | 139 | 2.76E-03 |
| cg14358502 | <i>NAT6</i>      | -3.664 | 69  | 93  | 2.76E-03 |
| cg03169180 | <i>NLGN2</i>     | 0.508  | 115 | 47  | 2.76E-03 |
| cg00848397 | <i>MGC4172</i>   | -4.635 | 60  | 102 | 2.76E-03 |
| cg18110535 | <i>LPIN2</i>     | -4.242 | 65  | 97  | 2.76E-03 |
| cg01785060 | <i>ZDHHC21</i>   | -4.715 | 104 | 58  | 2.76E-03 |
| cg10028071 | <i>COMMD3</i>    | -4.403 | 47  | 115 | 2.77E-03 |
| cg27176536 | <i>RAB26</i>     | -2.042 | 86  | 76  | 2.77E-03 |
| cg12073779 | <i>CRYGD</i>     | -1.438 | 62  | 100 | 2.77E-03 |
| cg24429836 | <i>LDHD</i>      | -0.771 | 49  | 113 | 2.77E-03 |
| cg26532905 | <i>RNASEL</i>    | 1.218  | 98  | 64  | 2.77E-03 |
| cg18627308 | <i>FLJ10661</i>  | -3.298 | 56  | 106 | 2.77E-03 |
| cg11712199 | <i>TAIP-2</i>    | 1.423  | 125 | 30  | 2.78E-03 |
| cg12875426 | <i>DYM</i>       | 0.405  | 121 | 41  | 2.78E-03 |
| cg16104446 | <i>MCM4</i>      | -2.967 | 105 | 57  | 2.79E-03 |
| cg20524216 | <i>TMEM103</i>   | -5.684 | 54  | 108 | 2.79E-03 |
| cg02480835 | <i>NUPL2</i>     | -4.862 | 119 | 43  | 2.79E-03 |
| cg05917963 | <i>CHUK</i>      | -1.886 | 33  | 129 | 2.79E-03 |
| cg10778415 | <i>RSAFD1</i>    | -3.772 | 95  | 67  | 2.79E-03 |
| cg23106864 | <i>SASS6</i>     | -4.739 | 37  | 125 | 2.79E-03 |
| cg23365832 | <i>TPST2</i>     | -5.853 | 62  | 100 | 2.79E-03 |
| cg24440147 | <i>PKN3</i>      | 1.358  | 60  | 102 | 2.79E-03 |
| cg02298612 | <i>CHST6</i>     | 1.467  | 105 | 57  | 2.79E-03 |
| cg23128056 | <i>KRT15</i>     | 2.122  | 40  | 122 | 2.79E-03 |
| cg21954994 | <i>POLE4</i>     | -5.580 | 131 | 31  | 2.79E-03 |
| cg12845249 | <i>THAP11</i>    | -5.116 | 75  | 87  | 2.79E-03 |
| cg23101680 | <i>NURIT</i>     | -0.702 | 96  | 65  | 2.79E-03 |

|            |                  |        |     |     |          |
|------------|------------------|--------|-----|-----|----------|
| cg19951443 | <i>C9orf46</i>   | -5.996 | 45  | 117 | 2.79E-03 |
| cg23502772 | <i>MGC42105</i>  | -3.874 | 39  | 123 | 2.79E-03 |
| cg04335339 | <i>ATRN1</i>     | -2.266 | 86  | 76  | 2.79E-03 |
| cg06882926 | <i>OR1G1</i>     | 0.473  | 140 | 22  | 2.79E-03 |
| cg17644208 | <i>ADCY3</i>     | -0.620 | 112 | 50  | 2.79E-03 |
| cg19026306 | <i>KIAA1539</i>  | -4.889 | 49  | 113 | 2.79E-03 |
| cg15083233 | <i>AKAP2</i>     | -2.698 | 63  | 99  | 2.80E-03 |
| cg27368011 | <i>CGRRF1</i>    | -5.974 | 43  | 119 | 2.80E-03 |
| cg06101225 | <i>STIL</i>      | -4.805 | 82  | 80  | 2.80E-03 |
| cg14011734 | <i>TATDN2</i>    | -4.687 | 44  | 118 | 2.80E-03 |
| cg16829154 | <i>NOTCH1</i>    | -4.678 | 60  | 102 | 2.80E-03 |
| cg11670211 | <i>NOX4</i>      | -4.090 | 94  | 68  | 2.80E-03 |
| cg18670235 | <i>PLOD3</i>     | -3.548 | 101 | 61  | 2.80E-03 |
| cg25778166 | <i>FMO3</i>      | 2.085  | 125 | 37  | 2.80E-03 |
| cg22842233 | <i>UPK1B</i>     | 1.306  | 145 | 17  | 2.80E-03 |
| cg14707431 | <i>C9orf97</i>   | -5.043 | 58  | 104 | 2.80E-03 |
| cg15627524 | <i>DOPEY1</i>    | -2.986 | 30  | 132 | 2.80E-03 |
| cg09597465 | <i>SLC15A4</i>   | -4.458 | 74  | 88  | 2.81E-03 |
| cg24215727 | <i>ABCD3</i>     | -4.482 | 48  | 114 | 2.81E-03 |
| cg13975369 | <i>TSGA14</i>    | -1.588 | 102 | 60  | 2.81E-03 |
| cg16296356 | <i>RAD51L3</i>   | -1.596 | 77  | 85  | 2.81E-03 |
| cg19038540 | <i>EDG1</i>      | -4.300 | 104 | 58  | 2.81E-03 |
| cg11730691 | <i>NOD9</i>      | -4.673 | 48  | 114 | 2.81E-03 |
| cg10927536 | <i>LOC402055</i> | -5.297 | 99  | 63  | 2.81E-03 |
| cg08806153 | <i>HOXD11</i>    | -3.946 | 91  | 71  | 2.81E-03 |
| cg16306115 | <i>DCDC2</i>     | -4.284 | 95  | 67  | 2.81E-03 |
| cg19034028 | <i>CDH3</i>      | 1.515  | 103 | 59  | 2.82E-03 |
| cg13765621 | <i>CD1D</i>      | -1.474 | 84  | 78  | 2.82E-03 |
| cg27537600 | <i>SPAG1</i>     | -5.135 | 48  | 114 | 2.82E-03 |
| cg22571217 | <i>DAPK1</i>     | -5.014 | 103 | 59  | 2.82E-03 |
| cg10364513 | <i>RXRG</i>      | -4.981 | 81  | 81  | 2.82E-03 |
| cg04127303 | <i>ZZZ3</i>      | -4.493 | 80  | 82  | 2.82E-03 |
| cg05769169 | <i>EGLN3</i>     | -4.227 | 76  | 86  | 2.82E-03 |
| cg03787486 | <i>ADH5</i>      | -5.289 | 63  | 99  | 2.82E-03 |
| cg04478795 | <i>SMO</i>       | -3.057 | 95  | 67  | 2.82E-03 |
| cg08956138 | <i>CD3E</i>      | -2.134 | 96  | 66  | 2.82E-03 |
| cg01991383 | <i>FOXRED1</i>   | -4.959 | 29  | 133 | 2.83E-03 |
| cg12796229 | <i>C18orf43</i>  | -3.903 | 73  | 89  | 2.83E-03 |
| cg15600835 | <i>raptor</i>    | -4.121 | 64  | 98  | 2.83E-03 |
| cg04988978 | <i>MPO</i>       | -0.397 | 108 | 54  | 2.83E-03 |
| cg17676096 | <i>LEO1</i>      | -5.526 | 53  | 109 | 2.83E-03 |
| cg03428000 | <i>HSMPP8</i>    | -4.466 | 58  | 104 | 2.83E-03 |
| cg08966293 | <i>MAPK3</i>     | -4.208 | 88  | 74  | 2.83E-03 |
| cg14958635 | <i>NEUROG1</i>   | -2.177 | 12  | 150 | 2.83E-03 |
| cg11443787 | <i>MLLT10</i>    | -3.821 | 39  | 123 | 2.83E-03 |
| cg26029248 | <i>PFKFB4</i>    | -5.882 | 88  | 74  | 2.84E-03 |
| cg13754949 | <i>REV1L</i>     | -4.356 | 66  | 96  | 2.84E-03 |
| cg13804316 | <i>XKR8</i>      | -3.438 | 103 | 59  | 2.84E-03 |
| cg20616414 | <i>WNK2</i>      | -1.488 | 23  | 139 | 2.84E-03 |
| cg27072323 | <i>CAP1</i>      | -4.613 | 78  | 84  | 2.84E-03 |
| cg11564268 | <i>NOB1P</i>     | -5.025 | 47  | 115 | 2.84E-03 |
| cg18768283 | <i>NUT</i>       | 1.242  | 86  | 70  | 2.84E-03 |
| cg14070647 | <i>RSPO2</i>     | -3.408 | 95  | 67  | 2.84E-03 |
| cg10707300 | <i>ZNF653</i>    | -4.618 | 85  | 77  | 2.85E-03 |
| cg18043828 | <i>C9orf150</i>  | -4.702 | 67  | 95  | 2.85E-03 |

|            |           |        |     |     |          |
|------------|-----------|--------|-----|-----|----------|
| cg08291098 | STMN3     | -4.089 | 38  | 124 | 2.85E-03 |
| cg09491779 | C9orf82   | -3.617 | 97  | 65  | 2.85E-03 |
| cg22647018 | AGT       | 2.442  | 39  | 123 | 2.85E-03 |
| cg05676042 | PPME1     | -4.533 | 79  | 83  | 2.86E-03 |
| cg06005396 | HCN2      | -3.344 | 31  | 131 | 2.86E-03 |
| cg22609576 | SPG20     | -4.995 | 63  | 99  | 2.86E-03 |
| cg11158760 | FHIT      | -3.735 | 61  | 101 | 2.86E-03 |
| cg12320676 | E2F6      | -3.872 | 79  | 83  | 2.86E-03 |
| cg19587401 | LOC374395 | -6.004 | 42  | 120 | 2.86E-03 |
| cg02539714 | RHOF      | -5.570 | 53  | 109 | 2.86E-03 |
| cg21800439 | STAT2     | -5.315 | 67  | 95  | 2.86E-03 |
| cg27378424 | DRG1      | -5.632 | 105 | 57  | 2.86E-03 |
| cg13234863 | KIAA1944  | -2.671 | 106 | 56  | 2.86E-03 |
| cg14465910 | GTPBP2    | -4.586 | 52  | 110 | 2.86E-03 |
| cg21226234 | LRRC14    | 2.979  | 76  | 86  | 2.86E-03 |
| cg11540692 | SIM1      | -1.771 | 92  | 70  | 2.87E-03 |
| cg24461814 | KRTHB4    | 2.582  | 89  | 73  | 2.87E-03 |
| cg23346960 | ZFP36     | -3.943 | 72  | 90  | 2.87E-03 |
| cg16777782 | CDH13     | 4.005  | 127 | 35  | 2.87E-03 |
| cg16842485 | C6orf47   | -5.333 | 53  | 109 | 2.87E-03 |
| cg25957967 | PCSK9     | -4.977 | 99  | 63  | 2.87E-03 |
| cg14795305 | SMARCD3   | -4.821 | 105 | 57  | 2.87E-03 |
| cg23916948 | RAG1AP1   | -6.032 | 93  | 69  | 2.87E-03 |
| cg20313722 | FKRP      | 0.776  | 97  | 65  | 2.87E-03 |
| cg27076139 | ADCYAP1R1 | -4.419 | 60  | 102 | 2.87E-03 |
| cg09494188 | SCGB1A1   | 2.527  | 56  | 106 | 2.88E-03 |
| cg03087937 | MUC15     | 1.662  | 32  | 130 | 2.88E-03 |
| cg10261589 | LOC133308 | -2.813 | 56  | 106 | 2.88E-03 |
| cg23214267 | EYA2      | -3.912 | 80  | 82  | 2.88E-03 |
| cg17541922 | PRSS23    | -4.785 | 59  | 103 | 2.88E-03 |
| cg10087081 | KIAA0355  | 0.590  | 99  | 63  | 2.88E-03 |
| cg12825252 | FLJ14397  | -6.199 | 51  | 111 | 2.88E-03 |
| cg02537909 | COBLL1    | -4.808 | 96  | 66  | 2.89E-03 |
| cg13810225 | MYH9      | -4.358 | 83  | 79  | 2.89E-03 |
| cg27375072 | SMPDL3A   | -4.566 | 69  | 93  | 2.89E-03 |
| cg10561472 | ZBTB7A    | -5.234 | 80  | 82  | 2.89E-03 |
| cg26833602 | SUSD3     | -2.292 | 58  | 104 | 2.89E-03 |
| cg25178645 | RUNX3     | 4.796  | 53  | 109 | 2.89E-03 |
| cg07861564 | HSPB8     | -4.301 | 40  | 122 | 2.89E-03 |
| cg15320474 | UBD       | 1.756  | 40  | 122 | 2.90E-03 |
| cg24073161 | ZNF403    | -5.542 | 116 | 46  | 2.90E-03 |
| cg05142576 | HIST1H2AH | -3.533 | 79  | 83  | 2.90E-03 |
| cg04044561 | POP7      | -5.230 | 42  | 120 | 2.90E-03 |
| cg24222324 | TNFSF11   | 2.425  | 116 | 46  | 2.90E-03 |
| cg18370227 | KRTHA3A   | 2.753  | 91  | 71  | 2.90E-03 |
| cg03443922 | CBLL1     | -4.450 | 85  | 77  | 2.90E-03 |
| cg27188703 | FAIM2     | -1.896 | 89  | 73  | 2.90E-03 |
| cg22063989 | RSPO1     | -4.483 | 66  | 96  | 2.90E-03 |
| cg15043801 | DNMT1     | -4.562 | 77  | 85  | 2.90E-03 |
| cg17165284 | DNM2      | -2.765 | 64  | 98  | 2.90E-03 |
| cg23070249 | HIST1H2BC | -3.854 | 91  | 71  | 2.91E-03 |
| cg01808130 | SLC35B3   | -3.696 | 94  | 68  | 2.91E-03 |
| cg11799561 | SMR3A     | 1.593  | 101 | 61  | 2.91E-03 |
| cg19921353 | HLA-DPB1  | -3.585 | 87  | 75  | 2.91E-03 |
| cg19042950 | IGF2BP3   | -3.026 | 114 | 48  | 2.91E-03 |

|            |                 |        |     |     |          |
|------------|-----------------|--------|-----|-----|----------|
| cg26845838 | <i>OACT2</i>    | -6.189 | 93  | 69  | 2.91E-03 |
| cg26975609 | <i>FASTK</i>    | -5.479 | 112 | 50  | 2.91E-03 |
| cg14021073 | <i>BRSK2</i>    | -3.822 | 37  | 125 | 2.91E-03 |
| cg06361108 | <i>CCNF</i>     | -5.631 | 76  | 86  | 2.91E-03 |
| cg14034870 | <i>SFTPG</i>    | 0.072  | 76  | 86  | 2.92E-03 |
| cg05492503 | <i>EPN2</i>     | -5.038 | 66  | 96  | 2.92E-03 |
| cg00500400 | <i>EP300</i>    | -4.103 | 65  | 97  | 2.92E-03 |
| cg14462626 | <i>MRLC2</i>    | -5.477 | 62  | 100 | 2.92E-03 |
| cg20483763 | <i>CABP4</i>    | 5.236  | 55  | 107 | 2.92E-03 |
| cg04466870 | <i>SFXN4</i>    | -4.485 | 55  | 107 | 2.92E-03 |
| cg22830895 | <i>CRYGN</i>    | -1.413 | 83  | 79  | 2.92E-03 |
| cg23348028 | <i>MAN1A1</i>   | -4.926 | 117 | 45  | 2.92E-03 |
| cg18611245 | <i>ZGPAT</i>    | -2.378 | 44  | 118 | 2.92E-03 |
| cg14195915 | <i>SFRS4</i>    | -4.945 | 85  | 77  | 2.92E-03 |
| cg07156669 | <i>CPD</i>      | -0.890 | 51  | 111 | 2.92E-03 |
| cg10918927 | <i>HOXC4</i>    | -3.689 | 105 | 57  | 2.92E-03 |
| cg02597269 | <i>MON1B</i>    | -4.959 | 111 | 51  | 2.92E-03 |
| cg24000189 | <i>FLOT1</i>    | -5.712 | 90  | 72  | 2.93E-03 |
| cg25230532 | <i>GALT</i>     | -3.057 | 87  | 75  | 2.93E-03 |
| cg17884373 | <i>PPM1A</i>    | 1.865  | 131 | 31  | 2.93E-03 |
| cg22082243 | <i>C10orf84</i> | -4.583 | 44  | 118 | 2.93E-03 |
| cg06244634 | <i>TAS2R4</i>   | 1.914  | 99  | 63  | 2.93E-03 |
| cg12444340 | <i>RBM5</i>     | -4.785 | 64  | 98  | 2.93E-03 |
| cg14578030 | <i>FGF4</i>     | 1.825  | 52  | 110 | 2.93E-03 |
| cg22189519 | <i>CDC37L1</i>  | 1.912  | 110 | 51  | 2.93E-03 |
| cg02317907 | <i>DIRAS3</i>   | 0.803  | 67  | 95  | 2.94E-03 |
| cg04038932 | <i>FLJ46082</i> | -3.325 | 87  | 75  | 2.94E-03 |
| cg20488657 | <i>TFF3</i>     | 2.102  | 84  | 78  | 2.94E-03 |
| cg25770411 | <i>WBSCR23</i>  | 1.107  | 36  | 123 | 2.94E-03 |
| cg05379350 | <i>GIT1</i>     | -0.642 | 22  | 140 | 2.94E-03 |
| cg21538194 | <i>DZIP1L</i>   | -4.529 | 73  | 89  | 2.94E-03 |
| cg09126273 | <i>PTPRO</i>    | -3.360 | 118 | 44  | 2.94E-03 |
| cg19055458 | <i>MYLIP</i>    | -4.918 | 82  | 80  | 2.94E-03 |
| cg01425670 | <i>NEGR1</i>    | -5.554 | 99  | 63  | 2.94E-03 |
| cg23980887 | <i>POLR2J</i>   | -4.842 | 118 | 44  | 2.94E-03 |
| cg02163937 | <i>FAM53B</i>   | -5.108 | 81  | 81  | 2.94E-03 |
| cg05492845 | <i>VEGFB</i>    | -5.682 | 80  | 82  | 2.94E-03 |
| cg20506783 | <i>ARHGAP22</i> | -3.570 | 117 | 45  | 2.94E-03 |
| cg15517965 | <i>MGC3123</i>  | -5.419 | 42  | 120 | 2.94E-03 |
| cg14532519 | <i>TCF20</i>    | 2.480  | 58  | 104 | 2.95E-03 |
| cg05221167 | <i>ZNF560</i>   | -3.398 | 85  | 77  | 2.95E-03 |
| cg25802871 | <i>FTSJ2</i>    | -2.355 | 91  | 71  | 2.95E-03 |
| cg15846718 | <i>COX7A2</i>   | -4.564 | 107 | 55  | 2.95E-03 |
| cg17597195 | <i>TMEM126B</i> | -5.753 | 95  | 67  | 2.95E-03 |
| cg09617747 | <i>NOB1P</i>    | -4.585 | 58  | 104 | 2.95E-03 |
| cg06868758 | <i>NDUFS1</i>   | 0.357  | 99  | 63  | 2.95E-03 |
| cg19881177 | <i>ZNF367</i>   | -5.704 | 64  | 98  | 2.95E-03 |
| cg19191883 | <i>PTD008</i>   | -5.076 | 108 | 54  | 2.95E-03 |
| cg12293634 | <i>RNF149</i>   | -5.508 | 76  | 86  | 2.95E-03 |
| cg04879235 | <i>PPY</i>      | 2.375  | 91  | 71  | 2.95E-03 |
| cg13438834 | <i>C22orf8</i>  | -4.312 | 68  | 94  | 2.95E-03 |
| cg08896053 | <i>SNTG1</i>    | -4.215 | 116 | 46  | 2.96E-03 |
| cg22176017 | <i>POLR2G</i>   | -3.654 | 118 | 44  | 2.96E-03 |
| cg10840135 | <i>CYP2D6</i>   | 1.969  | 71  | 91  | 2.96E-03 |
| cg16284292 | <i>ZNF297B</i>  | -4.368 | 86  | 76  | 2.96E-03 |

|            |                  |        |     |     |          |
|------------|------------------|--------|-----|-----|----------|
| cg20525549 | <i>CRLF3</i>     | -4.626 | 112 | 50  | 2.96E-03 |
| cg22665276 | <i>ZNF85</i>     | -4.377 | 97  | 65  | 2.96E-03 |
| cg11554605 | <i>ASB4</i>      | 1.613  | 68  | 94  | 2.97E-03 |
| cg25466974 | <i>SLC30A1</i>   | -5.379 | 111 | 51  | 2.97E-03 |
| cg16323498 | <i>C17orf39</i>  | -5.371 | 75  | 87  | 2.97E-03 |
| cg07678643 | <i>LOC113444</i> | -4.228 | 56  | 106 | 2.98E-03 |
| cg12179176 | <i>SNX19</i>     | -5.285 | 68  | 94  | 2.98E-03 |
| cg10878896 | <i>CS</i>        | -4.495 | 81  | 81  | 2.98E-03 |
| cg23972869 | <i>RPL18</i>     | 1.868  | 20  | 141 | 2.98E-03 |
| cg22792938 | <i>HRB</i>       | -5.685 | 73  | 89  | 2.98E-03 |
| cg26171231 | <i>CLCN3</i>     | -4.353 | 59  | 103 | 2.98E-03 |
| cg03545635 | <i>CHST12</i>    | 2.053  | 100 | 62  | 2.98E-03 |
| cg05718253 | <i>LOC55908</i>  | 1.866  | 118 | 44  | 2.98E-03 |
| cg11985856 | <i>SAR1A</i>     | -4.761 | 105 | 57  | 2.98E-03 |
| cg05501276 | <i>TRA2A</i>     | -5.342 | 42  | 120 | 2.99E-03 |
| cg02729506 | <i>HSPG2</i>     | -4.364 | 104 | 58  | 2.99E-03 |
| cg16652639 | <i>TM2D2</i>     | -4.616 | 57  | 105 | 2.99E-03 |
| cg00047469 | <i>C9orf43</i>   | -5.041 | 68  | 94  | 2.99E-03 |
| cg10910525 | <i>HRC</i>       | 0.907  | 89  | 73  | 2.99E-03 |
| cg21515243 | <i>RIOK3</i>     | -3.217 | 115 | 47  | 2.99E-03 |
| cg05955224 | <i>CRI2</i>      | -3.979 | 86  | 76  | 2.99E-03 |
| cg19603195 | <i>STOML1</i>    | -3.765 | 69  | 93  | 2.99E-03 |
| cg19226593 | <i>DCTN2</i>     | -4.057 | 130 | 32  | 2.99E-03 |
| cg07676849 | <i>FOLR3</i>     | 0.346  | 73  | 89  | 3.00E-03 |
| cg15010067 | <i>MRPL54</i>    | -4.361 | 52  | 110 | 3.00E-03 |
| cg03438515 | <i>SRGAP3</i>    | -4.737 | 84  | 78  | 3.00E-03 |
| cg06508445 | <i>LOX</i>       | -5.012 | 60  | 102 | 3.00E-03 |
| cg09378940 | <i>LACTB2</i>    | -4.618 | 84  | 78  | 3.00E-03 |
| cg23935746 | <i>CCNB1</i>     | -5.304 | 130 | 32  | 3.00E-03 |
| cg01242619 | <i>PLEC1</i>     | -1.763 | 77  | 85  | 3.00E-03 |
| cg07599644 | <i>MGC34830</i>  | 1.912  | 19  | 143 | 3.00E-03 |
| cg04677163 | <i>CAV1</i>      | -4.071 | 109 | 53  | 3.00E-03 |
| cg26771272 | <i>SMCR7</i>     | 1.830  | 76  | 86  | 3.01E-03 |
| cg19515324 | <i>ASH2L</i>     | -4.692 | 120 | 42  | 3.01E-03 |
| cg16837769 | <i>NDUFA4</i>    | -4.418 | 53  | 109 | 3.01E-03 |
| cg06335889 | <i>CBFA2T2</i>   | -4.504 | 90  | 72  | 3.01E-03 |
| cg05950276 | <i>TMTC4</i>     | 2.249  | 44  | 118 | 3.01E-03 |
| cg11739626 | <i>AKT1S1</i>    | 1.505  | 122 | 40  | 3.01E-03 |
| cg10861599 | <i>TNFSF4</i>    | -0.800 | 113 | 49  | 3.02E-03 |
| cg18217172 | <i>REPS1</i>     | -6.129 | 98  | 64  | 3.02E-03 |
| cg01120165 | <i>HDAC10</i>    | -4.012 | 35  | 127 | 3.02E-03 |
| cg00164898 | <i>MAPK11</i>    | -4.286 | 37  | 125 | 3.02E-03 |
| cg04557383 | <i>MT1H</i>      | -1.500 | 83  | 79  | 3.03E-03 |
| cg11037424 | <i>C20orf14</i>  | -5.486 | 120 | 42  | 3.03E-03 |
| cg15167433 | <i>XRCC1</i>     | -3.729 | 89  | 73  | 3.03E-03 |
| cg00705255 | <i>LILRA3</i>    | -1.199 | 101 | 61  | 3.03E-03 |
| cg25886284 | <i>ZNF545</i>    | -5.270 | 82  | 80  | 3.03E-03 |
| cg05593479 | <i>TIGD1</i>     | -4.328 | 70  | 92  | 3.04E-03 |
| cg07123548 | <i>HIPK4</i>     | 1.875  | 73  | 89  | 3.04E-03 |
| cg24266238 | <i>PFN2</i>      | -4.271 | 97  | 65  | 3.04E-03 |
| cg00321478 | <i>CRB1</i>      | 1.384  | 103 | 59  | 3.04E-03 |
| cg15105703 | <i>NIP</i>       | -3.220 | 96  | 66  | 3.04E-03 |
| cg15214137 | <i>PGM2L1</i>    | -4.542 | 71  | 91  | 3.04E-03 |
| cg06796611 | <i>IL24</i>      | 0.510  | 54  | 108 | 3.05E-03 |
| cg06240542 | <i>CYBASC3</i>   | -4.440 | 60  | 102 | 3.05E-03 |

|            |                     |        |     |     |          |
|------------|---------------------|--------|-----|-----|----------|
| cg25059792 | <i>EIF3S4</i>       | -4.384 | 98  | 64  | 3.05E-03 |
| cg16239406 | <i>MTCH1</i>        | -6.015 | 72  | 90  | 3.05E-03 |
| cg22925639 | <i>CHRNA1</i>       | 2.728  | 56  | 106 | 3.05E-03 |
| cg07895149 | <i>FAM26B</i>       | -5.508 | 131 | 31  | 3.05E-03 |
| cg15977816 | <i>KCNN4</i>        | -2.974 | 93  | 68  | 3.05E-03 |
| cg24687051 | <i>KCNQ5</i>        | -5.160 | 65  | 97  | 3.05E-03 |
| cg11172299 | <i>C14orf130</i>    | -6.210 | 67  | 95  | 3.06E-03 |
| cg08093398 | <i>PSF1</i>         | 1.431  | 64  | 98  | 3.06E-03 |
| cg15018760 | <i>SCO2</i>         | -5.094 | 60  | 102 | 3.06E-03 |
| cg19324172 | <i>PPID</i>         | -4.520 | 94  | 68  | 3.06E-03 |
| cg08958015 | <i>CCDC65</i>       | -4.082 | 72  | 90  | 3.06E-03 |
| cg20277250 | <i>TINP1</i>        | 2.207  | 109 | 53  | 3.06E-03 |
| cg08331313 | <i>SPARC</i>        | -4.789 | 74  | 88  | 3.07E-03 |
| cg06059810 | <i>RUFY3</i>        | 1.202  | 116 | 46  | 3.07E-03 |
| cg13067215 | <i>CGI-38</i>       | -2.743 | 29  | 133 | 3.07E-03 |
| cg27367554 | <i>CGI-09</i>       | -5.689 | 60  | 102 | 3.07E-03 |
| cg16142977 | <i>EEF2</i>         | -5.288 | 85  | 77  | 3.07E-03 |
| cg01468621 | <i>BRSK2</i>        | -3.784 | 107 | 55  | 3.07E-03 |
| cg26824467 | <i>LASS6</i>        | -4.502 | 107 | 55  | 3.07E-03 |
| cg11780382 | <i>C6orf62</i>      | -4.369 | 73  | 89  | 3.07E-03 |
| cg21922841 | <i>SLC9A3R1</i>     | -3.382 | 99  | 63  | 3.07E-03 |
| cg05414338 | <i>HIST1H3F</i>     | -4.676 | 118 | 44  | 3.07E-03 |
| cg09059181 | <i>NOLC1</i>        | -4.881 | 47  | 115 | 3.08E-03 |
| cg08388746 | <i>C1orf83</i>      | -2.374 | 49  | 113 | 3.08E-03 |
| cg07248407 | <i>DNM2</i>         | -5.254 | 99  | 63  | 3.08E-03 |
| cg27508002 | <i>SMAD9</i>        | 1.202  | 44  | 118 | 3.08E-03 |
| cg06661765 | <i>NFIX</i>         | -5.094 | 72  | 90  | 3.09E-03 |
| cg03860890 | <i>EGFR</i>         | -3.419 | 84  | 78  | 3.09E-03 |
| cg24362401 | <i>PIK3C3</i>       | -3.862 | 47  | 115 | 3.09E-03 |
| cg26832154 | <i>DKFZp434N035</i> | 2.615  | 88  | 74  | 3.09E-03 |
| cg03223878 | <i>BHLHB2</i>       | -4.997 | 39  | 123 | 3.10E-03 |
| cg10298815 | <i>GPR88</i>        | -4.186 | 107 | 55  | 3.10E-03 |
| cg18593668 | <i>GNAZ</i>         | -4.479 | 84  | 78  | 3.10E-03 |
| cg10387416 | <i>TATDN2</i>       | -4.936 | 43  | 119 | 3.10E-03 |
| cg10452522 | <i>LSM14A</i>       | -4.519 | 48  | 114 | 3.10E-03 |
| cg07696033 | <i>ALX4</i>         | -2.530 | 16  | 146 | 3.10E-03 |
| cg21383720 | <i>C9orf10</i>      | -6.018 | 48  | 114 | 3.10E-03 |
| cg11390468 | <i>IFT57</i>        | -4.466 | 120 | 42  | 3.12E-03 |
| cg18299211 | <i>PIGK</i>         | -5.440 | 83  | 79  | 3.12E-03 |
| cg27018070 | <i>FHL3</i>         | -3.742 | 103 | 59  | 3.12E-03 |
| cg05552534 | <i>ABCB10</i>       | -5.303 | 89  | 73  | 3.12E-03 |
| cg02244695 | <i>HCA112</i>       | -3.220 | 79  | 83  | 3.12E-03 |
| cg03418289 | <i>LIX1L</i>        | -6.191 | 81  | 81  | 3.13E-03 |
| cg17280624 | <i>PGRMC2</i>       | -5.259 | 51  | 111 | 3.13E-03 |
| cg24736099 | <i>PLCB4</i>        | 1.846  | 106 | 56  | 3.13E-03 |
| cg13821008 | <i>WASPIP</i>       | -0.078 | 63  | 99  | 3.13E-03 |
| cg09057265 | <i>FBXO3</i>        | -5.219 | 32  | 130 | 3.13E-03 |
| cg07428089 | <i>ATP5G3</i>       | -5.065 | 89  | 73  | 3.13E-03 |
| cg19511844 | <i>ORMDL3</i>       | -3.226 | 38  | 124 | 3.13E-03 |
| cg17197538 | <i>KRAS</i>         | -4.814 | 82  | 80  | 3.13E-03 |
| cg26884376 | <i>ABCF1</i>        | -5.266 | 68  | 94  | 3.13E-03 |
| cg22716127 | <i>SMAP1</i>        | -5.935 | 96  | 66  | 3.13E-03 |
| cg22068473 | <i>DDIT4</i>        | -3.586 | 63  | 99  | 3.14E-03 |
| cg06953768 | <i>FLJ37562</i>     | -2.682 | 108 | 54  | 3.14E-03 |
| cg04745805 | <i>STAT5B</i>       | -3.721 | 64  | 98  | 3.14E-03 |

|            |               |        |     |     |          |
|------------|---------------|--------|-----|-----|----------|
| cg11166823 | AGPAT3        | -5.466 | 56  | 106 | 3.14E-03 |
| cg10833576 | ANKRA2        | -5.804 | 88  | 74  | 3.14E-03 |
| cg19275050 | HAS2          | -3.254 | 75  | 86  | 3.14E-03 |
| cg11953868 | WFDC10A       | -3.056 | 93  | 69  | 3.14E-03 |
| cg22074666 | C21orf7       | 1.092  | 101 | 61  | 3.14E-03 |
| cg03524627 | CDC25B        | -5.292 | 60  | 102 | 3.15E-03 |
| cg03411288 | C10orf47      | -4.662 | 83  | 79  | 3.15E-03 |
| cg06141123 | NFE2L2        | -3.526 | 130 | 32  | 3.15E-03 |
| cg09869791 | ABCD3         | -4.247 | 85  | 77  | 3.15E-03 |
| cg15111734 | C10orf13      | -3.521 | 31  | 131 | 3.15E-03 |
| cg26937500 | CARD11        | -4.350 | 80  | 82  | 3.15E-03 |
| cg24278423 | FOXA3         | -4.581 | 121 | 41  | 3.15E-03 |
| cg14489884 | MRFAP1L1      | -5.278 | 57  | 105 | 3.15E-03 |
| cg19141563 | PPM1E         | -5.606 | 102 | 60  | 3.15E-03 |
| cg04532229 | SLC9A2        | -5.562 | 100 | 62  | 3.16E-03 |
| cg09526693 | IL2           | 0.883  | 65  | 97  | 3.16E-03 |
| cg09806934 | CPT1A         | -5.831 | 88  | 74  | 3.16E-03 |
| cg17742155 | ATP6V1G1      | -5.631 | 94  | 68  | 3.16E-03 |
| cg24727182 | AGXT2L1       | -4.346 | 76  | 86  | 3.16E-03 |
| cg25487438 | NRL           | -4.292 | 43  | 119 | 3.16E-03 |
| cg01200060 | SCRT2         | -5.028 | 137 | 25  | 3.16E-03 |
| cg18925884 | IL17RD        | -4.993 | 127 | 35  | 3.16E-03 |
| cg11999384 | GRN           | -5.302 | 112 | 50  | 3.16E-03 |
| cg18851831 | DYRK1B        | -3.844 | 73  | 89  | 3.16E-03 |
| cg23641145 | PGR           | -3.467 | 68  | 94  | 3.16E-03 |
| cg12125691 | COX6C         | -5.100 | 122 | 40  | 3.16E-03 |
| cg09904573 | RNF122        | -4.734 | 99  | 63  | 3.16E-03 |
| cg10281002 | TBX5          | -2.610 | 90  | 72  | 3.16E-03 |
| cg14542839 | DKFZP586H212C | -1.778 | 67  | 95  | 3.16E-03 |
| cg26354398 | RGS3          | 2.551  | 54  | 108 | 3.17E-03 |
| cg00614413 | PTPRS         | -0.400 | 75  | 87  | 3.17E-03 |
| cg06728335 | RNPS1         | -5.420 | 80  | 82  | 3.17E-03 |
| cg18176813 | PDAP1         | -5.098 | 48  | 114 | 3.17E-03 |
| cg14560895 | JARID1B       | -3.960 | 44  | 118 | 3.17E-03 |
| cg08827391 | GDI2          | -5.676 | 74  | 88  | 3.18E-03 |
| cg07588779 | BAD           | -2.489 | 67  | 95  | 3.18E-03 |
| cg23480499 | METAP2        | -5.010 | 58  | 104 | 3.18E-03 |
| cg10957151 | HOXD9         | -2.130 | 99  | 63  | 3.19E-03 |
| cg16523471 | LOC283377     | -3.811 | 104 | 58  | 3.19E-03 |
| cg03266453 | EN1           | -3.133 | 67  | 95  | 3.19E-03 |
| cg00008493 | COX8C         | 5.158  | 95  | 67  | 3.20E-03 |
| cg02058918 | GABBR2        | -3.749 | 110 | 52  | 3.20E-03 |
| cg18248112 | KCNJ15        | 1.734  | 36  | 126 | 3.20E-03 |
| cg17146877 | CCDC32        | -4.001 | 70  | 92  | 3.20E-03 |
| cg06851207 | FLJ10781      | 0.207  | 38  | 124 | 3.20E-03 |
| cg16604136 | CDCA1         | -5.778 | 71  | 91  | 3.20E-03 |
| cg01282432 | C14orf101     | -4.710 | 67  | 95  | 3.21E-03 |
| cg04875709 | CDKN1B        | -5.721 | 50  | 112 | 3.21E-03 |
| cg16092786 | WT1           | -3.334 | 99  | 63  | 3.21E-03 |
| cg24650229 | IGSF11        | 3.537  | 106 | 56  | 3.21E-03 |
| cg04645049 | ARL6IP5       | -4.363 | 58  | 104 | 3.21E-03 |
| cg13415434 | WDR6          | -4.338 | 69  | 93  | 3.21E-03 |
| cg04084172 | CCNG1         | -5.268 | 51  | 111 | 3.21E-03 |
| cg01994513 | BLM           | -5.142 | 45  | 117 | 3.22E-03 |
| cg15627502 | RPN2          | -4.712 | 96  | 66  | 3.22E-03 |

|            |          |        |     |     |          |
|------------|----------|--------|-----|-----|----------|
| cg23075568 | CORO2A   | -5.604 | 48  | 114 | 3.22E-03 |
| cg19666391 | UNQ689   | 1.573  | 97  | 56  | 3.22E-03 |
| cg03439703 | PDE3B    | -1.419 | 71  | 91  | 3.22E-03 |
| cg06352750 | SDPR     | -4.182 | 51  | 111 | 3.22E-03 |
| cg15628498 | ONECUT1  | -6.145 | 75  | 87  | 3.22E-03 |
| cg12489819 | FDPS     | -3.924 | 69  | 93  | 3.22E-03 |
| cg21418076 | LTB4R2   | 3.144  | 55  | 107 | 3.22E-03 |
| cg24408199 | EIF2B5   | -4.928 | 60  | 102 | 3.23E-03 |
| cg08890043 | CHKB     | -4.786 | 67  | 95  | 3.23E-03 |
| cg11516377 | DPH1     | -3.042 | 96  | 66  | 3.23E-03 |
| cg12133004 | C12orf54 | 2.427  | 71  | 91  | 3.23E-03 |
| cg17489752 | BAT1     | -4.947 | 111 | 51  | 3.23E-03 |
| cg09885951 | CENPF    | -6.154 | 110 | 52  | 3.23E-03 |
| cg10185638 | ATG9A    | -5.872 | 111 | 51  | 3.23E-03 |
| cg06233473 | KPNA5    | -3.241 | 34  | 128 | 3.23E-03 |
| cg22035229 | MSH4     | 2.002  | 122 | 40  | 3.23E-03 |
| cg09867835 | GLP1R    | -2.670 | 92  | 70  | 3.24E-03 |
| cg11082575 | FAM60A   | -4.581 | 50  | 112 | 3.24E-03 |
| cg24088639 | APIP     | -4.902 | 75  | 87  | 3.24E-03 |
| cg01593190 | ADAMTS2  | -4.219 | 80  | 82  | 3.24E-03 |
| cg10988561 | PDCD6    | -2.734 | 85  | 77  | 3.24E-03 |
| cg00355802 | DUSP4    | -3.877 | 40  | 122 | 3.24E-03 |
| cg07804582 | MGC33367 | 2.029  | 89  | 73  | 3.24E-03 |
| cg18592307 | WDR76    | -4.664 | 77  | 85  | 3.24E-03 |
| cg04542415 | ZFP64    | -6.171 | 109 | 53  | 3.24E-03 |
| cg04498679 | C2       | -1.044 | 107 | 55  | 3.24E-03 |
| cg08174003 | ZNF600   | -5.056 | 67  | 95  | 3.24E-03 |
| cg19437319 | KIAA0196 | 2.850  | 75  | 87  | 3.24E-03 |
| cg20927059 | TFCP2    | -5.479 | 90  | 72  | 3.25E-03 |
| cg11688219 | THAP3    | -4.105 | 101 | 61  | 3.25E-03 |
| cg05998426 | RIN1     | -4.867 | 99  | 63  | 3.25E-03 |
| cg19824325 | SETD6    | -3.904 | 112 | 50  | 3.25E-03 |
| cg13948987 | HCRTR2   | -4.495 | 100 | 62  | 3.25E-03 |
| cg12441928 | CCR1     | -3.048 | 86  | 76  | 3.25E-03 |
| cg24791546 | DDX23    | -4.125 | 92  | 70  | 3.25E-03 |
| cg18915143 | PDE6A    | 3.132  | 106 | 56  | 3.25E-03 |
| cg00876704 | PKN1     | -5.417 | 136 | 26  | 3.25E-03 |
| cg20033731 | CACNA1C  | -3.788 | 75  | 87  | 3.26E-03 |
| cg26500816 | AIPL1    | -4.457 | 53  | 109 | 3.26E-03 |
| cg03790787 | FLJ22639 | -3.471 | 126 | 36  | 3.26E-03 |
| cg05373276 | C7orf28B | -4.927 | 56  | 106 | 3.27E-03 |
| cg15832436 | PACRG    | -4.145 | 55  | 107 | 3.27E-03 |
| cg26678313 | LRP1     | -4.404 | 125 | 37  | 3.27E-03 |
| cg23150219 | C19orf26 | -5.369 | 37  | 125 | 3.27E-03 |
| cg11459714 | KLK10    | -3.460 | 66  | 96  | 3.27E-03 |
| cg25433648 | S100A14  | 1.380  | 81  | 81  | 3.27E-03 |
| cg13179915 | KCNK7    | 2.517  | 81  | 81  | 3.27E-03 |
| cg00568792 | STT3A    | -3.751 | 89  | 73  | 3.27E-03 |
| cg25514304 | PSEN2    | 0.486  | 92  | 70  | 3.27E-03 |
| cg22686523 | FLJ25006 | 1.320  | 104 | 58  | 3.27E-03 |
| cg14828965 | RNF40    | -4.348 | 78  | 84  | 3.27E-03 |
| cg10677144 | MYOM1    | 2.839  | 92  | 70  | 3.28E-03 |
| cg19170321 | CAPN3    | 2.413  | 92  | 70  | 3.28E-03 |
| cg07896225 | BCL7C    | -6.081 | 53  | 109 | 3.28E-03 |
| cg05837075 | ERO1L    | -5.400 | 74  | 88  | 3.28E-03 |

|            |                 |        |     |     |          |
|------------|-----------------|--------|-----|-----|----------|
| cg11794728 | <i>KLF12</i>    | -5.242 | 88  | 74  | 3.28E-03 |
| cg15816080 | <i>TPST1</i>    | -5.130 | 95  | 67  | 3.28E-03 |
| cg15061008 | <i>CABIN1</i>   | -4.511 | 100 | 62  | 3.28E-03 |
| cg17992056 | <i>ICMT</i>     | -3.964 | 93  | 69  | 3.28E-03 |
| cg10944783 | <i>TBPIP</i>    | -5.479 | 38  | 124 | 3.28E-03 |
| cg17803089 | <i>FANCE</i>    | -4.384 | 43  | 119 | 3.28E-03 |
| cg23271318 | <i>ZSWIM1</i>   | -3.813 | 106 | 56  | 3.28E-03 |
| cg24577137 | <i>TPR</i>      | -3.771 | 59  | 103 | 3.29E-03 |
| cg13878010 | <i>ADCY5</i>    | -3.078 | 75  | 87  | 3.29E-03 |
| cg23306832 | <i>KIAA0999</i> | -2.910 | 18  | 144 | 3.29E-03 |
| cg17976381 | <i>SMARCB1</i>  | -3.324 | 104 | 58  | 3.29E-03 |
| cg12004730 | <i>TAX1BP3</i>  | -5.234 | 61  | 101 | 3.29E-03 |
| cg14671453 | <i>STX4A</i>    | -5.515 | 113 | 49  | 3.29E-03 |
| cg01684579 | <i>HSPC111</i>  | -0.507 | 59  | 102 | 3.30E-03 |
| cg15561986 | <i>POMT2</i>    | -4.671 | 82  | 80  | 3.30E-03 |
| cg23185657 | <i>TIMM10</i>   | -4.343 | 69  | 93  | 3.30E-03 |
| cg23655719 | <i>CCL19</i>    | 2.789  | 88  | 74  | 3.30E-03 |
| cg17965019 | <i>HIST1H3J</i> | -3.734 | 103 | 59  | 3.30E-03 |
| cg23092823 | <i>PODN</i>     | -3.350 | 104 | 58  | 3.30E-03 |
| cg14533138 | <i>KRTHA3B</i>  | 1.931  | 64  | 98  | 3.30E-03 |
| cg15272690 | <i>HSPC065</i>  | -4.211 | 80  | 82  | 3.31E-03 |
| cg25363445 | <i>ALX4</i>     | -2.392 | 75  | 87  | 3.31E-03 |
| cg11194725 | <i>CBX1</i>     | -4.307 | 25  | 137 | 3.31E-03 |
| cg07000785 | <i>GADD45A</i>  | -3.825 | 98  | 64  | 3.31E-03 |
| cg12477012 | <i>NASP</i>     | -4.705 | 48  | 114 | 3.31E-03 |
| cg18112005 | <i>C14orf80</i> | -5.129 | 34  | 128 | 3.32E-03 |
| cg16199381 | <i>C9orf97</i>  | -4.355 | 38  | 124 | 3.32E-03 |
| cg24800887 | <i>FANCA</i>    | 3.056  | 37  | 125 | 3.32E-03 |
| cg06823263 | <i>USF1</i>     | -4.100 | 94  | 68  | 3.32E-03 |
| cg00940278 | <i>GATA6</i>    | -5.268 | 64  | 98  | 3.32E-03 |
| cg18117847 | <i>ZNFN1A1</i>  | 1.167  | 91  | 71  | 3.32E-03 |
| cg22396691 | <i>MRPS25</i>   | -4.445 | 47  | 115 | 3.33E-03 |
| cg14018807 | <i>GCC1</i>     | -5.913 | 83  | 79  | 3.33E-03 |
| cg16883145 | <i>TGFB1</i>    | 4.417  | 69  | 93  | 3.33E-03 |
| cg24582500 | <i>TXNL2</i>    | -3.102 | 57  | 105 | 3.33E-03 |
| cg05882691 | <i>HIST1H3H</i> | -2.385 | 102 | 60  | 3.33E-03 |
| cg11706911 | <i>AGMAT</i>    | -2.549 | 93  | 69  | 3.33E-03 |
| cg24579896 | <i>KTN1</i>     | -4.600 | 55  | 107 | 3.33E-03 |
| cg04541078 | <i>ARCN1</i>    | -5.216 | 81  | 81  | 3.33E-03 |
| cg08242020 | <i>RTN3</i>     | -5.193 | 94  | 68  | 3.33E-03 |
| cg14438174 | <i>DVL2</i>     | -4.408 | 90  | 72  | 3.33E-03 |
| cg04838107 | <i>ARF6</i>     | -2.973 | 36  | 126 | 3.33E-03 |
| cg01472101 | <i>CLEC10A</i>  | -0.944 | 96  | 66  | 3.34E-03 |
| cg04398275 | <i>SBNO1</i>    | 1.772  | 79  | 83  | 3.34E-03 |
| cg19799744 | <i>ENPP5</i>    | -4.232 | 67  | 95  | 3.34E-03 |
| cg09273772 | <i>TOP2A</i>    | -2.987 | 49  | 113 | 3.34E-03 |
| cg20308817 | <i>CLEC11A</i>  | 0.702  | 69  | 93  | 3.34E-03 |
| cg16313587 | <i>BRF2</i>     | -5.173 | 91  | 71  | 3.35E-03 |
| cg25162794 | <i>ANKRD23</i>  | 2.420  | 90  | 72  | 3.35E-03 |
| cg06619076 | <i>ASPH</i>     | -3.978 | 82  | 80  | 3.35E-03 |
| cg02280309 | <i>PKLR</i>     | 1.840  | 60  | 102 | 3.35E-03 |
| cg14198172 | <i>HBXIP</i>    | -3.001 | 84  | 78  | 3.35E-03 |
| cg14757296 | <i>HYAL1</i>    | 2.501  | 105 | 57  | 3.35E-03 |
| cg05749577 | <i>KIF23</i>    | -6.070 | 82  | 80  | 3.35E-03 |
| cg21900416 | <i>SERTAD3</i>  | -6.017 | 96  | 66  | 3.35E-03 |

|            |                  |        |     |     |          |
|------------|------------------|--------|-----|-----|----------|
| cg13353683 | <i>PTRF</i>      | -4.646 | 54  | 108 | 3.35E-03 |
| cg07346310 | <i>RBM24</i>     | -3.691 | 133 | 29  | 3.35E-03 |
| cg20074048 | <i>SECISBP2</i>  | -4.225 | 98  | 64  | 3.35E-03 |
| cg17693957 | <i>TCN2</i>      | -4.009 | 82  | 80  | 3.35E-03 |
| cg08307092 | <i>HIST1H3D</i>  | -4.673 | 125 | 37  | 3.36E-03 |
| cg01883966 | <i>STK19</i>     | 2.932  | 134 | 28  | 3.36E-03 |
| cg23423382 | <i>ZNF287</i>    | -4.697 | 109 | 53  | 3.36E-03 |
| cg11654737 | <i>BCKDHB</i>    | -3.490 | 54  | 108 | 3.36E-03 |
| cg04587829 | <i>FN3K</i>      | 0.554  | 48  | 114 | 3.37E-03 |
| cg27431247 | <i>CHKA</i>      | -4.713 | 76  | 86  | 3.37E-03 |
| cg04542938 | <i>ATXN1</i>     | -5.165 | 59  | 103 | 3.37E-03 |
| cg27513764 | <i>EFCAB3</i>    | 1.936  | 22  | 140 | 3.37E-03 |
| cg01570086 | <i>ARID3B</i>    | -4.166 | 62  | 100 | 3.37E-03 |
| cg07080358 | <i>C2orf32</i>   | -4.623 | 47  | 115 | 3.38E-03 |
| cg14615807 | <i>BSND</i>      | 1.765  | 101 | 61  | 3.38E-03 |
| cg03386903 | <i>KCNAB3</i>    | 2.978  | 104 | 58  | 3.38E-03 |
| cg06910048 | <i>FLJ10726</i>  | -4.819 | 109 | 53  | 3.38E-03 |
| cg24357161 | <i>RCV1</i>      | -0.255 | 117 | 45  | 3.38E-03 |
| cg15342384 | <i>HNRPH3</i>    | -6.435 | 52  | 110 | 3.39E-03 |
| cg06190732 | <i>SERPINA3</i>  | -0.621 | 63  | 98  | 3.39E-03 |
| cg07581365 | <i>CBX8</i>      | -4.710 | 73  | 89  | 3.39E-03 |
| cg20757196 | <i>TRAF7</i>     | -4.796 | 52  | 110 | 3.39E-03 |
| cg11498188 | <i>HECA</i>      | -4.672 | 65  | 97  | 3.39E-03 |
| cg07757386 | <i>RAGE</i>      | -4.614 | 33  | 129 | 3.39E-03 |
| cg17285325 | <i>ECGF1</i>     | -4.721 | 93  | 69  | 3.39E-03 |
| cg13806670 | <i>43898</i>     | -5.780 | 49  | 113 | 3.40E-03 |
| cg13890487 | <i>HBLD2</i>     | -5.304 | 80  | 82  | 3.40E-03 |
| cg05209463 | <i>TETRA</i>     | -5.338 | 47  | 115 | 3.41E-03 |
| cg01539186 | <i>ZNF336</i>    | -3.454 | 104 | 58  | 3.41E-03 |
| cg12408911 | <i>SLC7A5</i>    | 0.925  | 102 | 60  | 3.41E-03 |
| cg24207176 | <i>ABCG2</i>     | -3.649 | 84  | 78  | 3.41E-03 |
| cg25999267 | <i>FLJ20551</i>  | -5.985 | 87  | 75  | 3.41E-03 |
| cg19903229 | <i>C14orf105</i> | -0.781 | 75  | 87  | 3.41E-03 |
| cg24727203 | <i>PPP1R3B</i>   | -3.543 | 60  | 102 | 3.41E-03 |
| cg08766149 | <i>GZMB</i>      | 2.306  | 53  | 109 | 3.41E-03 |
| cg20797766 | <i>PRSS27</i>    | -3.999 | 57  | 105 | 3.41E-03 |
| cg09818732 | <i>FLJ20489</i>  | -5.603 | 121 | 41  | 3.42E-03 |
| cg04055049 | <i>GPR153</i>    | -4.429 | 80  | 82  | 3.42E-03 |
| cg07654843 | <i>MYO18B</i>    | 2.516  | 56  | 106 | 3.42E-03 |
| cg15542496 | <i>PIP</i>       | 2.661  | 62  | 100 | 3.42E-03 |
| cg18192417 | <i>NEBL</i>      | -2.489 | 54  | 108 | 3.42E-03 |
| cg24777454 | <i>LRRC34</i>    | -3.243 | 89  | 73  | 3.42E-03 |
| cg01782487 | <i>ERMAP</i>     | -4.772 | 125 | 37  | 3.42E-03 |
| cg13461509 | <i>ECHDC2</i>    | -4.481 | 77  | 85  | 3.42E-03 |
| cg20147100 | <i>C19orf6</i>   | -5.244 | 50  | 112 | 3.42E-03 |
| cg05898102 | <i>PCDHB10</i>   | -3.791 | 99  | 63  | 3.42E-03 |
| cg14676817 | <i>C1orf108</i>  | -5.036 | 53  | 109 | 3.42E-03 |
| cg22344641 | <i>TRUB2</i>     | -3.329 | 123 | 39  | 3.42E-03 |
| cg22572159 | <i>NGFB</i>      | -3.970 | 59  | 103 | 3.42E-03 |
| cg22932215 | <i>COPS7B</i>    | -3.377 | 31  | 131 | 3.43E-03 |
| cg09898548 | <i>C20orf86</i>  | 1.768  | 60  | 101 | 3.43E-03 |
| cg10639440 | <i>SCRN1</i>     | -3.115 | 60  | 102 | 3.43E-03 |
| cg10720654 |                  | -1.127 | 63  | 99  | 3.43E-03 |
| cg21494337 | <i>MGC11266</i>  | -3.686 | 60  | 102 | 3.44E-03 |
| cg13379871 | <i>PCGF4</i>     | -5.843 | 50  | 112 | 3.44E-03 |

|            |                  |        |     |     |          |
|------------|------------------|--------|-----|-----|----------|
| cg18485154 | <i>TTLL4</i>     | -4.635 | 49  | 113 | 3.44E-03 |
| cg26826852 | <i>ACTR5</i>     | -4.989 | 96  | 66  | 3.44E-03 |
| cg16494590 | <i>BTN2A3</i>    | -4.054 | 82  | 80  | 3.44E-03 |
| cg02844629 | <i>ARV1</i>      | -4.196 | 47  | 115 | 3.45E-03 |
| cg13349425 | <i>C5orf20</i>   | 0.910  | 103 | 59  | 3.45E-03 |
| cg24012157 | <i>DDX50</i>     | -4.837 | 64  | 98  | 3.45E-03 |
| cg13232900 | <i>ADAT1</i>     | -5.147 | 99  | 63  | 3.45E-03 |
| cg14409941 | <i>ADAMTS2</i>   | -5.377 | 80  | 82  | 3.45E-03 |
| cg06330324 | <i>SLC35E4</i>   | -4.972 | 115 | 47  | 3.45E-03 |
| cg14426682 | <i>MORF4L1</i>   | 2.451  | 43  | 119 | 3.45E-03 |
| cg21407839 | <i>DYRK1A</i>    | -5.197 | 40  | 122 | 3.45E-03 |
| cg00422913 | <i>MGC14376</i>  | -4.490 | 100 | 62  | 3.45E-03 |
| cg14967972 | <i>PANK1</i>     | -3.577 | 103 | 59  | 3.45E-03 |
| cg00602891 | <i>C17orf62</i>  | -3.458 | 15  | 147 | 3.46E-03 |
| cg20775254 | <i>PROM2</i>     | 1.331  | 84  | 78  | 3.46E-03 |
| cg16817891 | <i>IGF2AS</i>    | -4.991 | 57  | 105 | 3.46E-03 |
| cg22385764 | <i>ASB8</i>      | -4.465 | 111 | 51  | 3.47E-03 |
| cg05290904 | <i>RBBP5</i>     | -4.426 | 100 | 62  | 3.47E-03 |
| cg01999523 | <i>CLASP2</i>    | -2.759 | 49  | 113 | 3.47E-03 |
| cg17903544 | <i>PGAM5</i>     | -4.445 | 72  | 90  | 3.47E-03 |
| cg08724517 | <i>FLJ21159</i>  | -2.929 | 24  | 138 | 3.47E-03 |
| cg14592406 | <i>CABP1</i>     | -6.770 | 101 | 61  | 3.48E-03 |
| cg10037005 | <i>CD37</i>      | 0.168  | 75  | 87  | 3.48E-03 |
| cg10227191 | <i>KRT18</i>     | -5.154 | 82  | 80  | 3.48E-03 |
| cg14093368 | <i>BAZ1B</i>     | -4.203 | 63  | 99  | 3.48E-03 |
| cg13564595 | <i>GRPEL1</i>    | -6.106 | 69  | 93  | 3.48E-03 |
| cg04969808 | <i>WNT7A</i>     | -3.428 | 77  | 85  | 3.48E-03 |
| cg06636246 | <i>MLR2</i>      | -3.864 | 121 | 41  | 3.48E-03 |
| cg08661003 | <i>C20orf116</i> | 3.318  | 54  | 108 | 3.48E-03 |
| cg10481740 | <i>LETM1</i>     | -3.012 | 54  | 108 | 3.48E-03 |
| cg07749808 | <i>SYT17</i>     | -5.659 | 70  | 92  | 3.48E-03 |
| cg26233914 | <i>ITGAX</i>     | -2.101 | 61  | 101 | 3.48E-03 |
| cg07778080 | <i>NPC1</i>      | -5.569 | 68  | 94  | 3.48E-03 |
| cg09330643 | <i>LRRC20</i>    | -5.704 | 55  | 107 | 3.48E-03 |
| cg20872461 | <i>RFC4</i>      | -5.813 | 95  | 67  | 3.48E-03 |
| cg25152631 | <i>SLC25A36</i>  | -5.405 | 110 | 52  | 3.49E-03 |
| cg19453250 | <i>STAT1P1</i>   | -0.595 | 49  | 112 | 3.49E-03 |
| cg00678539 | <i>MNS1</i>      | -1.647 | 118 | 44  | 3.49E-03 |
| cg01333619 | <i>VPS26B</i>    | -4.911 | 87  | 75  | 3.49E-03 |
| cg02025407 | <i>C20orf155</i> | -5.439 | 67  | 95  | 3.49E-03 |
| cg20855565 | <i>TRIM58</i>    | -4.117 | 104 | 58  | 3.49E-03 |
| cg02878987 | <i>C1orf58</i>   | -4.094 | 88  | 74  | 3.49E-03 |
| cg17260124 | <i>KCTD14</i>    | 3.551  | 68  | 94  | 3.49E-03 |
| cg04737405 | <i>OR12D2</i>    | 1.214  | 108 | 54  | 3.49E-03 |
| cg08674093 | <i>DCUN1D1</i>   | -4.244 | 57  | 105 | 3.50E-03 |
| cg03989322 | <i>SLC30A5</i>   | -4.787 | 85  | 77  | 3.50E-03 |
| cg14464791 | <i>DDX6</i>      | -2.573 | 94  | 68  | 3.50E-03 |
| cg07844572 | <i>FTSJ3</i>     | -4.468 | 38  | 124 | 3.50E-03 |
| cg04958703 | <i>SLC25A11</i>  | -2.736 | 72  | 90  | 3.50E-03 |
| cg03860400 | <i>BTBD10</i>    | -2.747 | 88  | 74  | 3.50E-03 |
| cg24611092 | <i>HAT1</i>      | 2.491  | 70  | 92  | 3.50E-03 |
| cg18189063 | <i>SPHK2</i>     | -5.613 | 80  | 82  | 3.51E-03 |
| cg03503295 | <i>DNAH5</i>     | 1.814  | 130 | 32  | 3.51E-03 |
| cg24208172 | <i>CDS1</i>      | -4.852 | 62  | 100 | 3.51E-03 |
| cg11512771 | <i>ECM1</i>      | 3.062  | 99  | 63  | 3.51E-03 |

|            |                 |        |     |     |          |
|------------|-----------------|--------|-----|-----|----------|
| cg25923018 | <i>C1orf75</i>  | -5.268 | 57  | 105 | 3.51E-03 |
| cg27584171 | <i>KIAA0256</i> | -4.462 | 46  | 116 | 3.52E-03 |
| cg19714749 | <i>TPK1</i>     | -5.017 | 61  | 101 | 3.52E-03 |
| cg12729059 | <i>IFNGR1</i>   | -5.748 | 94  | 68  | 3.52E-03 |
| cg13221796 | <i>RB1</i>      | 1.401  | 93  | 69  | 3.52E-03 |
| cg25018755 | <i>BIK</i>      | -4.417 | 110 | 52  | 3.52E-03 |
| cg07704144 | <i>SNPH</i>     | -4.147 | 13  | 149 | 3.52E-03 |
| cg27177839 | <i>JAG2</i>     | -3.171 | 77  | 85  | 3.52E-03 |
| cg02641560 | <i>DSCR1L2</i>  | -4.630 | 78  | 84  | 3.53E-03 |
| cg26674132 | <i>ZNF559</i>   | -1.532 | 69  | 93  | 3.53E-03 |
| cg10549188 | <i>ANP32E</i>   | -4.598 | 118 | 44  | 3.53E-03 |
| cg25861458 | <i>FLJ23356</i> | -4.862 | 100 | 62  | 3.53E-03 |
| cg24183958 | <i>GRB10</i>    | -4.588 | 84  | 78  | 3.53E-03 |
| cg00217795 | <i>DIO2</i>     | -0.305 | 88  | 74  | 3.53E-03 |
| cg12599000 | <i>ZNF322B</i>  | 2.552  | 71  | 91  | 3.54E-03 |
| cg00650762 | <i>EPHB2</i>    | -6.111 | 69  | 93  | 3.54E-03 |
| cg00491404 | <i>EPS8L3</i>   | 2.035  | 76  | 86  | 3.54E-03 |
| cg19714296 | <i>CYP4A11</i>  | 2.496  | 55  | 107 | 3.54E-03 |
| cg04420907 | <i>WDRPUH</i>   | -2.824 | 74  | 88  | 3.54E-03 |
| cg18841952 | <i>GPR115</i>   | 1.349  | 75  | 87  | 3.54E-03 |
| cg12738197 | <i>ZNF572</i>   | -4.430 | 56  | 106 | 3.54E-03 |
| cg06602857 | <i>FOXF1</i>    | -4.836 | 91  | 71  | 3.55E-03 |
| cg08090396 | <i>NEK4</i>     | -4.859 | 89  | 73  | 3.55E-03 |
| cg25276849 | <i>TFRC</i>     | -4.689 | 43  | 119 | 3.55E-03 |
| cg05122605 | <i>MAEA</i>     | -4.742 | 86  | 76  | 3.55E-03 |
| cg13643796 | <i>ADAMTS3</i>  | -4.606 | 65  | 97  | 3.55E-03 |
| cg14823109 | <i>BCAS4</i>    | -5.114 | 64  | 98  | 3.56E-03 |
| cg26179948 | <i>JAZF1</i>    | -4.288 | 84  | 78  | 3.56E-03 |
| cg17259741 | <i>ZNF509</i>   | -6.010 | 76  | 86  | 3.56E-03 |
| cg03001647 | <i>MPZL1</i>    | -3.690 | 64  | 98  | 3.56E-03 |
| cg06331674 | <i>KIAA0241</i> | -4.776 | 56  | 106 | 3.56E-03 |
| cg08607082 | <i>ICAM1</i>    | -4.564 | 87  | 75  | 3.56E-03 |
| cg09464487 | <i>ACTR6</i>    | -5.352 | 76  | 86  | 3.56E-03 |
| cg17641252 | <i>PLEK2</i>    | 0.221  | 34  | 128 | 3.56E-03 |
| cg20271396 | <i>C1orf19</i>  | -5.008 | 66  | 96  | 3.57E-03 |
| cg00067471 | <i>ATP5D</i>    | -2.569 | 74  | 88  | 3.57E-03 |
| cg00037763 | <i>SETBP1</i>   | 3.110  | 85  | 77  | 3.57E-03 |
| cg22967284 | <i>SLIT1</i>    | -4.862 | 85  | 77  | 3.57E-03 |
| cg20492401 | <i>KIAA0195</i> | -4.820 | 84  | 78  | 3.58E-03 |
| cg02989257 | <i>COL16A1</i>  | 0.999  | 68  | 94  | 3.58E-03 |
| cg02868338 | <i>EXOSC4</i>   | -4.395 | 47  | 115 | 3.58E-03 |
| cg07461318 | <i>NTN4</i>     | -4.611 | 84  | 78  | 3.58E-03 |
| cg10005894 | <i>ST6GAL1</i>  | -3.941 | 57  | 105 | 3.59E-03 |
| cg03067226 | <i>TPI1</i>     | -5.277 | 45  | 117 | 3.59E-03 |
| cg14358743 | <i>GAS6</i>     | 3.308  | 132 | 30  | 3.59E-03 |
| cg15914863 | <i>CYP2W1</i>   | 1.170  | 84  | 78  | 3.59E-03 |
| cg03278643 | <i>EVC2</i>     | -0.012 | 60  | 102 | 3.60E-03 |
| cg25179291 | <i>FNBP1</i>    | -4.908 | 80  | 82  | 3.60E-03 |
| cg20074795 | <i>KDEL3</i>    | -4.929 | 72  | 90  | 3.60E-03 |
| cg04979725 | <i>UNKL</i>     | -5.348 | 75  | 87  | 3.60E-03 |
| cg11426590 | <i>TRIM62</i>   | -5.176 | 47  | 115 | 3.60E-03 |
| cg14056942 | <i>TSC22D2</i>  | -3.815 | 72  | 90  | 3.61E-03 |
| cg15277108 | <i>SDS</i>      | 2.030  | 108 | 54  | 3.61E-03 |
| cg09750083 | <i>ETAA16</i>   | -3.829 | 35  | 127 | 3.61E-03 |
| cg08205865 | <i>SAC</i>      | 0.199  | 115 | 47  | 3.61E-03 |

|            |                  |        |     |     |          |
|------------|------------------|--------|-----|-----|----------|
| cg11784785 | <i>SLC6A5</i>    | -3.315 | 85  | 77  | 3.61E-03 |
| cg08929103 | <i>CRHR1</i>     | 0.866  | 125 | 37  | 3.62E-03 |
| cg23389061 | <i>C14orf122</i> | -4.766 | 43  | 119 | 3.62E-03 |
| cg14424579 | <i>FLJ21839</i>  | -4.207 | 82  | 80  | 3.62E-03 |
| cg14261863 | <i>ELMO2</i>     | -3.619 | 47  | 115 | 3.63E-03 |
| cg18106189 | <i>C18orf1</i>   | -5.551 | 77  | 85  | 3.63E-03 |
| cg07075930 | <i>PTPRM</i>     | -4.156 | 74  | 88  | 3.63E-03 |
| cg24631950 | <i>UBE2D1</i>    | -4.523 | 103 | 59  | 3.63E-03 |
| cg27043427 | <i>PSMD12</i>    | -5.344 | 54  | 108 | 3.63E-03 |
| cg12241125 | <i>WBSCR1</i>    | -4.264 | 54  | 108 | 3.63E-03 |
| cg09688763 | <i>ZDHHC6</i>    | -4.402 | 90  | 72  | 3.63E-03 |
| cg09892203 | <i>CACNG4</i>    | -5.914 | 69  | 93  | 3.63E-03 |
| cg03438904 | <i>LRCH3</i>     | -5.075 | 47  | 115 | 3.63E-03 |
| cg21974766 | <i>NBLA04196</i> | -4.636 | 93  | 69  | 3.63E-03 |
| cg23029193 | <i>FLJ39155</i>  | -3.983 | 50  | 112 | 3.63E-03 |
| cg00644033 | <i>MUC3B</i>     | 4.254  | 34  | 128 | 3.64E-03 |
| cg09230173 | <i>PGM5</i>      | -2.393 | 100 | 62  | 3.64E-03 |
| cg16465769 | <i>SLC22A7</i>   | 2.030  | 35  | 127 | 3.64E-03 |
| cg26045434 | <i>HR</i>        | -2.740 | 106 | 56  | 3.64E-03 |
| cg24121001 | <i>TTC16</i>     | -2.259 | 103 | 59  | 3.64E-03 |
| cg12529228 | <i>NHLH1</i>     | 2.862  | 67  | 95  | 3.64E-03 |
| cg25023829 | <i>H2BFS</i>     | 2.384  | 109 | 53  | 3.65E-03 |
| cg06111454 | <i>NFATC4</i>    | -4.375 | 98  | 64  | 3.65E-03 |
| cg16158220 | <i>REGL</i>      | 2.046  | 55  | 107 | 3.65E-03 |
| cg00567479 | <i>FARP2</i>     | -4.391 | 82  | 80  | 3.65E-03 |
| cg16474684 | <i>RNF4</i>      | -3.491 | 80  | 82  | 3.65E-03 |
| cg03417317 | <i>C10orf77</i>  | -4.372 | 42  | 120 | 3.65E-03 |
| cg22044848 | <i>RAFTLIN</i>   | -4.467 | 106 | 56  | 3.65E-03 |
| cg18452600 | <i>MSRA</i>      | -3.600 | 100 | 62  | 3.65E-03 |
| cg18666238 | <i>FUBP1</i>     | -5.029 | 75  | 87  | 3.65E-03 |
| cg11467738 | <i>ARPC1B</i>    | -4.425 | 45  | 117 | 3.66E-03 |
| cg12775479 | <i>IGSF10</i>    | 2.681  | 119 | 43  | 3.66E-03 |
| cg02342494 | <i>MGC50559</i>  | -3.336 | 51  | 111 | 3.67E-03 |
| cg14091223 | <i>DNAJB2</i>    | -5.398 | 114 | 48  | 3.67E-03 |
| cg22309489 | <i>OKL38</i>     | 2.926  | 49  | 113 | 3.67E-03 |
| cg01733783 | <i>HSPA5</i>     | -4.795 | 29  | 133 | 3.67E-03 |
| cg15334028 | <i>DNM2</i>      | -2.912 | 24  | 138 | 3.67E-03 |
| cg12960248 | <i>MGC11335</i>  | -4.190 | 115 | 47  | 3.68E-03 |
| cg06465021 | <i>SLC12A2</i>   | -4.347 | 40  | 122 | 3.68E-03 |
| cg14299800 | <i>TOR1B</i>     | 3.059  | 77  | 85  | 3.68E-03 |
| cg23111544 | <i>REG1A</i>     | 1.377  | 106 | 56  | 3.69E-03 |
| cg14452392 | <i>CCNH</i>      | -5.273 | 80  | 82  | 3.69E-03 |
| cg05843800 | <i>SUMF1</i>     | -4.750 | 104 | 58  | 3.69E-03 |
| cg02181494 | <i>ARSA</i>      | -5.370 | 70  | 92  | 3.69E-03 |
| cg08623787 | <i>RXRG</i>      | -2.673 | 81  | 81  | 3.69E-03 |
| cg19636871 | <i>LDHAL6B</i>   | 3.211  | 156 | 6   | 3.69E-03 |
| cg00645224 | <i>GTF2IRD2</i>  | -4.552 | 55  | 107 | 3.69E-03 |
| cg17724365 | <i>NBN</i>       | -4.283 | 62  | 100 | 3.69E-03 |
| cg16386158 | <i>IL1RL1</i>    | 1.465  | 83  | 79  | 3.70E-03 |
| cg21931212 | <i>C12orf57</i>  | -4.581 | 122 | 40  | 3.70E-03 |
| cg12434587 | <i>MGMT</i>      | -5.819 | 105 | 57  | 3.70E-03 |
| cg18934103 | <i>SLC35F2</i>   | -5.230 | 64  | 98  | 3.71E-03 |
| cg09106817 | <i>MAP3K7IP2</i> | -4.315 | 71  | 91  | 3.71E-03 |
| cg07933176 | <i>MGC3265</i>   | -3.568 | 59  | 103 | 3.71E-03 |
| cg09411366 | <i>PEPD</i>      | -1.443 | 77  | 85  | 3.71E-03 |

|            |                  |        |     |     |          |
|------------|------------------|--------|-----|-----|----------|
| cg12236045 | <i>LRRTM3</i>    | -4.021 | 91  | 71  | 3.72E-03 |
| cg23233234 | <i>FLJ14668</i>  | -5.964 | 64  | 98  | 3.72E-03 |
| cg24124789 | <i>IARS2</i>     | -4.755 | 64  | 98  | 3.72E-03 |
| cg26884581 | <i>PYGM</i>      | -0.929 | 56  | 106 | 3.72E-03 |
| cg27087525 | <i>FAM8A1</i>    | -4.487 | 94  | 68  | 3.72E-03 |
| cg10179684 | <i>STARD7</i>    | -4.799 | 38  | 124 | 3.72E-03 |
| cg09759260 | <i>ITGA2</i>     | -3.827 | 62  | 100 | 3.72E-03 |
| cg17162271 | <i>GPSN2</i>     | -5.038 | 124 | 38  | 3.72E-03 |
| cg27365426 | <i>ARHGAP15</i>  | 0.042  | 32  | 130 | 3.72E-03 |
| cg05637351 | <i>CDH7</i>      | -4.012 | 68  | 94  | 3.72E-03 |
| cg14588638 | <i>RHBDD3</i>    | -4.521 | 46  | 116 | 3.72E-03 |
| cg01655123 | <i>PHLDB3</i>    | -4.808 | 56  | 106 | 3.72E-03 |
| cg07248310 | <i>HOOK1</i>     | -5.499 | 71  | 91  | 3.72E-03 |
| cg26753512 | <i>RABEPK</i>    | -4.112 | 52  | 110 | 3.72E-03 |
| cg03274876 | <i>FLJ20534</i>  | -5.383 | 125 | 37  | 3.73E-03 |
| cg23632840 | <i>MKKS</i>      | -5.891 | 94  | 68  | 3.73E-03 |
| cg05970437 | <i>KLF16</i>     | -4.437 | 57  | 105 | 3.73E-03 |
| cg05679613 | <i>MEPE</i>      | 2.273  | 74  | 88  | 3.73E-03 |
| cg12460359 | <i>KLK1</i>      | 1.048  | 84  | 78  | 3.73E-03 |
| cg04803153 | <i>MGC62100</i>  | -1.878 | 130 | 31  | 3.73E-03 |
| cg12629515 | <i>HIST1H2BO</i> | -0.269 | 24  | 138 | 3.74E-03 |
| cg22919370 | <i>HIST1H3I</i>  | -3.919 | 89  | 73  | 3.74E-03 |
| cg14701410 | <i>SLC4A8</i>    | -5.098 | 95  | 67  | 3.74E-03 |
| cg21068152 | <i>SIRT4</i>     | -4.260 | 97  | 65  | 3.75E-03 |
| cg13539030 | <i>ARL4C</i>     | -5.730 | 43  | 119 | 3.75E-03 |
| cg07974891 | <i>ITGB1BP1</i>  | -0.271 | 91  | 71  | 3.75E-03 |
| cg17176395 | <i>RAB2</i>      | -5.017 | 67  | 95  | 3.76E-03 |
| cg18340214 | <i>MRPL33</i>    | -5.268 | 57  | 105 | 3.76E-03 |
| cg24222435 | <i>LOC221143</i> | -4.967 | 84  | 78  | 3.76E-03 |
| cg27524460 | <i>PTGER1</i>    | -1.541 | 91  | 71  | 3.76E-03 |
| cg00057593 | <i>GML</i>       | 0.550  | 74  | 88  | 3.76E-03 |
| cg25543676 | <i>SMARCE1</i>   | -5.290 | 113 | 49  | 3.76E-03 |
| cg15851800 | <i>LOC133619</i> | -5.109 | 95  | 67  | 3.76E-03 |
| cg14271908 | <i>TFAM</i>      | -4.687 | 47  | 115 | 3.77E-03 |
| cg01803238 | <i>BCL2</i>      | -4.661 | 135 | 27  | 3.78E-03 |
| cg07494518 | <i>SNF1LK</i>    | -5.356 | 80  | 82  | 3.78E-03 |
| cg07990939 | <i>TMTC3</i>     | -5.174 | 55  | 107 | 3.78E-03 |
| cg18061485 | <i>GPX4</i>      | -5.208 | 68  | 94  | 3.78E-03 |
| cg11698762 | <i>WDR54</i>     | -3.701 | 94  | 68  | 3.78E-03 |
| cg08876470 | <i>GCDH</i>      | -4.905 | 105 | 57  | 3.78E-03 |
| cg08736146 | <i>MRPL10</i>    | -4.898 | 69  | 93  | 3.79E-03 |
| cg11984608 | <i>CLDN16</i>    | 1.629  | 29  | 133 | 3.79E-03 |
| cg18361093 | <i>PAOX</i>      | -3.256 | 79  | 83  | 3.79E-03 |
| cg17304433 | <i>ERGIC1</i>    | -4.894 | 62  | 100 | 3.79E-03 |
| cg23644213 | <i>PIGO</i>      | -4.177 | 47  | 115 | 3.79E-03 |
| cg00476580 | <i>ANP32E</i>    | -5.339 | 50  | 112 | 3.79E-03 |
| cg24576270 | <i>CUGBP1</i>    | -4.859 | 36  | 126 | 3.79E-03 |
| cg02622316 | <i>ZNF96</i>     | -4.550 | 24  | 138 | 3.80E-03 |
| cg13396213 | <i>ZNF575</i>    | -4.448 | 93  | 69  | 3.80E-03 |
| cg19280776 | <i>PAG1</i>      | -2.759 | 137 | 25  | 3.80E-03 |
| cg13097407 | <i>CRIP3</i>     | -3.581 | 58  | 104 | 3.80E-03 |
| cg16310262 | <i>C15orf44</i>  | -3.751 | 31  | 131 | 3.80E-03 |
| cg20897667 | <i>PEG3</i>      | 0.330  | 68  | 94  | 3.80E-03 |
| cg18996776 | <i>KPNA4</i>     | -4.073 | 39  | 123 | 3.80E-03 |
| cg07897701 | <i>ABP1</i>      | 0.880  | 92  | 70  | 3.81E-03 |

|            |               |        |     |     |          |
|------------|---------------|--------|-----|-----|----------|
| cg17641104 | PCTK2         | -4.790 | 74  | 88  | 3.81E-03 |
| cg14863484 | GOT2          | -4.699 | 55  | 107 | 3.81E-03 |
| cg26757722 | CACNG2        | 0.608  | 29  | 132 | 3.81E-03 |
| cg04686412 | PSD2          | -2.638 | 63  | 99  | 3.81E-03 |
| cg07031532 | OAZ2          | -4.727 | 90  | 72  | 3.82E-03 |
| cg22262549 | POLR3C        | -4.140 | 136 | 26  | 3.82E-03 |
| cg27628312 | EPHB6         | -5.754 | 107 | 55  | 3.82E-03 |
| cg18502522 | SCAMP2        | -4.990 | 30  | 132 | 3.82E-03 |
| cg12680609 | ZFP41         | -3.964 | 86  | 76  | 3.82E-03 |
| cg13913917 | ATP11B        | -5.221 | 85  | 77  | 3.82E-03 |
| cg20325517 | FLJ23518      | -4.372 | 83  | 79  | 3.82E-03 |
| cg24083641 | MGC46496      | -4.196 | 68  | 94  | 3.82E-03 |
| cg15415507 | EPHA2         | -2.000 | 67  | 95  | 3.83E-03 |
| cg03557698 | C1orf177      | 3.875  | 77  | 85  | 3.83E-03 |
| cg06804711 | MALT1         | -4.588 | 98  | 64  | 3.83E-03 |
| cg00133909 | CD276         | -3.660 | 61  | 101 | 3.83E-03 |
| cg00578575 | ZNF596        | -3.560 | 109 | 53  | 3.83E-03 |
| cg11887234 | SMUG1         | -3.503 | 113 | 49  | 3.84E-03 |
| cg17657618 | FLJ43806      | 0.485  | 53  | 109 | 3.84E-03 |
| cg03920233 | DOC2A         | -5.619 | 54  | 108 | 3.84E-03 |
| cg06957329 | MRPS23        | -5.298 | 85  | 77  | 3.84E-03 |
| cg14137939 | FLJ38159      | -0.279 | 112 | 50  | 3.84E-03 |
| cg08611714 | KRTHA2        | 1.208  | 34  | 128 | 3.84E-03 |
| cg17725472 | CHIT1         | 4.259  | 43  | 119 | 3.84E-03 |
| cg11899895 | TAX1BP1       | -4.993 | 87  | 75  | 3.84E-03 |
| cg10042178 | LMO4          | -4.423 | 101 | 61  | 3.84E-03 |
| cg10083236 | FAM98A        | -5.472 | 79  | 83  | 3.84E-03 |
| cg24444408 | KLHDC4        | -4.142 | 72  | 90  | 3.84E-03 |
| cg05666713 | DKFZp434B1231 | 1.814  | 73  | 89  | 3.84E-03 |
| cg24587268 | OSBPL2        | -4.067 | 66  | 96  | 3.84E-03 |
| cg13434852 | DOCK1         | 2.811  | 78  | 84  | 3.85E-03 |
| cg13365022 | MC4R          | -3.204 | 53  | 109 | 3.85E-03 |
| cg02194211 | FAM3D         | 1.763  | 99  | 63  | 3.85E-03 |
| cg24677780 | CA11          | -4.169 | 59  | 103 | 3.85E-03 |
| cg02854090 | HIST1H2AA     | 3.234  | 121 | 41  | 3.85E-03 |
| cg03017475 | TAS2R38       | 0.816  | 125 | 33  | 3.85E-03 |
| cg18027946 | C21orf2       | -4.616 | 63  | 99  | 3.85E-03 |
| cg11653709 | CDKN2A        | -2.372 | 73  | 89  | 3.85E-03 |
| cg16127845 | GPR30         | -3.984 | 67  | 95  | 3.85E-03 |
| cg02254649 | ENAH          | -4.362 | 50  | 112 | 3.86E-03 |
| cg17532978 | NEUROD4       | -3.485 | 79  | 83  | 3.86E-03 |
| cg09266965 | TRIM52        | -2.943 | 37  | 125 | 3.86E-03 |
| cg12707353 | FLJ35725      | 0.707  | 69  | 93  | 3.86E-03 |
| cg10895543 | CDKN2A        | -2.398 | 33  | 129 | 3.86E-03 |
| cg15649452 | ATOX1         | -4.476 | 96  | 66  | 3.87E-03 |
| cg18997662 | ZNF441        | -5.210 | 84  | 78  | 3.87E-03 |
| cg18856252 | TYK2          | -4.844 | 130 | 32  | 3.87E-03 |
| cg21210789 | BAI1          | -1.732 | 118 | 44  | 3.87E-03 |
| cg25023245 | AXIN1         | -4.593 | 85  | 77  | 3.87E-03 |
| cg09545860 | NS4ATP2       | -4.612 | 80  | 82  | 3.87E-03 |
| cg18844850 | COPS7A        | -4.697 | 133 | 29  | 3.87E-03 |
| cg03714397 | SEC63D1       | 2.181  | 94  | 68  | 3.88E-03 |
| cg05593780 | PHF5A         | -4.574 | 51  | 111 | 3.88E-03 |
| cg17767184 | DHFR1L1       | -4.089 | 85  | 77  | 3.88E-03 |
| cg03070588 | USP30         | -4.009 | 101 | 61  | 3.88E-03 |

|            |                 |        |     |     |          |
|------------|-----------------|--------|-----|-----|----------|
| cg21751787 | <i>LMAN2</i>    | -5.392 | 79  | 83  | 3.89E-03 |
| cg14367344 | <i>PRKAB2</i>   | -5.936 | 76  | 86  | 3.89E-03 |
| cg23830611 | <i>NOMO1</i>    | -4.832 | 95  | 67  | 3.89E-03 |
| cg22198425 | <i>TCEB3</i>    | -5.192 | 96  | 66  | 3.90E-03 |
| cg23093462 | <i>PARD3</i>    | -4.557 | 47  | 115 | 3.90E-03 |
| cg16914151 | <i>RPP25</i>    | -3.799 | 128 | 34  | 3.90E-03 |
| cg06414605 | <i>HES1</i>     | -4.517 | 70  | 92  | 3.90E-03 |
| cg10774440 | <i>LEFTY1</i>   | 1.406  | 70  | 92  | 3.90E-03 |
| cg20326853 | <i>CPSF1</i>    | -4.686 | 97  | 65  | 3.90E-03 |
| cg10959933 | <i>C15orf39</i> | -3.385 | 78  | 84  | 3.90E-03 |
| cg21378047 | <i>H1FX</i>     | -4.700 | 56  | 106 | 3.91E-03 |
| cg05498681 | <i>SRC</i>      | 1.814  | 42  | 120 | 3.91E-03 |
| cg10752753 | <i>SLC45A2</i>  | -2.051 | 110 | 52  | 3.91E-03 |
| cg24266542 | <i>POLR3B</i>   | -4.844 | 102 | 60  | 3.91E-03 |
| cg18787975 | <i>CTSB</i>     | -3.872 | 76  | 86  | 3.91E-03 |
| cg00136105 | <i>GNPTAB</i>   | -4.542 | 83  | 79  | 3.92E-03 |
| cg08198102 | <i>PTPLA</i>    | -3.629 | 43  | 119 | 3.92E-03 |
| cg07136161 | <i>CYLC2</i>    | 1.964  | 15  | 147 | 3.92E-03 |
| cg20074593 | <i>GPR17</i>    | 1.227  | 87  | 75  | 3.93E-03 |
| cg22864416 | <i>CCNJ</i>     | -5.318 | 107 | 55  | 3.93E-03 |
| cg02241259 | <i>IL23R</i>    | 2.269  | 97  | 63  | 3.93E-03 |
| cg07028869 | <i>FLJ13236</i> | -2.197 | 107 | 55  | 3.93E-03 |
| cg26112353 | <i>BMP2K</i>    | -4.240 | 92  | 70  | 3.93E-03 |
| cg20520888 | <i>SPATC1</i>   | -1.739 | 110 | 52  | 3.93E-03 |
| cg16720880 | <i>CHMP5</i>    | -3.865 | 95  | 67  | 3.93E-03 |
| cg17233601 | <i>PTPN5</i>    | 0.103  | 48  | 114 | 3.93E-03 |
| cg22675150 | <i>TUBA2</i>    | 1.853  | 110 | 52  | 3.93E-03 |
| cg13262752 | <i>YIPF1</i>    | -3.920 | 95  | 67  | 3.93E-03 |
| cg12622986 | <i>BARHL1</i>   | -2.649 | 84  | 78  | 3.93E-03 |
| cg18221897 | <i>KIR2DL1</i>  | 1.520  | 93  | 69  | 3.94E-03 |
| cg12810190 | <i>CSAD</i>     | -5.759 | 73  | 89  | 3.94E-03 |
| cg02658251 | <i>DEFB4</i>    | 1.421  | 70  | 92  | 3.94E-03 |
| cg04668164 | <i>SMAP1L</i>   | -3.835 | 34  | 128 | 3.95E-03 |
| cg08286169 | <i>PEX3</i>     | -5.190 | 68  | 94  | 3.95E-03 |
| cg25226247 | <i>TFAP2B</i>   | -2.100 | 70  | 92  | 3.95E-03 |
| cg09667582 | <i>UBE2Q2</i>   | -3.350 | 100 | 62  | 3.95E-03 |
| cg17663463 | <i>ZIM2</i>     | 0.891  | 57  | 105 | 3.95E-03 |
| cg18267374 | <i>NEF3</i>     | -3.220 | 79  | 83  | 3.95E-03 |
| cg06496654 | <i>TAS2R7</i>   | 1.788  | 106 | 56  | 3.95E-03 |
| cg00524288 | <i>UPP1</i>     | -4.201 | 52  | 110 | 3.96E-03 |
| cg02501984 | <i>POLE</i>     | -6.332 | 74  | 88  | 3.96E-03 |
| cg09288658 | <i>ZAK</i>      | -5.307 | 93  | 69  | 3.96E-03 |
| cg26151310 | <i>SMARCA3</i>  | -3.722 | 37  | 125 | 3.96E-03 |
| cg07708788 | <i>SLCO2A1</i>  | -4.622 | 75  | 87  | 3.96E-03 |
| cg12683929 | <i>BLOC1S1</i>  | -2.395 | 56  | 106 | 3.96E-03 |
| cg12337114 | <i>TAS2R3</i>   | 3.210  | 123 | 39  | 3.96E-03 |
| cg20877313 | <i>GLS2</i>     | -4.970 | 94  | 68  | 3.96E-03 |
| cg14409083 | <i>EMP1</i>     | -4.284 | 56  | 106 | 3.97E-03 |
| cg08052882 | <i>NNT</i>      | -4.295 | 38  | 124 | 3.97E-03 |
| cg12696750 | <i>DNALI1</i>   | -3.615 | 54  | 108 | 3.97E-03 |
| cg15536242 | <i>MIP</i>      | 1.047  | 101 | 51  | 3.97E-03 |
| cg20406482 | <i>KCNH4</i>    | -1.996 | 69  | 93  | 3.97E-03 |
| cg10896886 | <i>ACTR3B</i>   | -5.152 | 123 | 39  | 3.98E-03 |
| cg13469311 | <i>PGRMC2</i>   | -5.889 | 70  | 92  | 3.98E-03 |
| cg24528523 | <i>SLC22A18</i> | -2.088 | 100 | 62  | 3.98E-03 |

|            |                 |        |     |     |          |
|------------|-----------------|--------|-----|-----|----------|
| cg20029201 | <i>BCL9L</i>    | -1.037 | 119 | 43  | 3.98E-03 |
| cg25548825 | <i>TBX10</i>    | 2.420  | 36  | 126 | 3.98E-03 |
| cg11465971 | <i>GSH2</i>     | -3.525 | 87  | 75  | 3.98E-03 |
| cg21909391 | <i>FLJ42393</i> | 1.895  | 59  | 103 | 3.99E-03 |
| cg22827524 | <i>FLJ43505</i> | 2.622  | 91  | 71  | 3.99E-03 |
| cg06502510 | <i>ITSN1</i>    | -4.529 | 67  | 95  | 3.99E-03 |
| cg15798530 | <i>TRPC3</i>    | 2.502  | 94  | 68  | 3.99E-03 |
| cg11498740 | <i>MOAP1</i>    | -4.544 | 88  | 74  | 3.99E-03 |
| cg04361527 | <i>PMVK</i>     | -4.814 | 69  | 93  | 3.99E-03 |
| cg10778619 | <i>KCNMB4</i>   | -5.015 | 87  | 75  | 3.99E-03 |
| cg05160935 | <i>THRAP6</i>   | -4.611 | 57  | 105 | 3.99E-03 |
| cg15669228 | <i>IFNA8</i>    | 1.289  | 67  | 95  | 4.00E-03 |
| cg25593948 | <i>TFAP2B</i>   | -2.437 | 94  | 68  | 4.00E-03 |
| cg12845808 | <i>PCDH12</i>   | 0.050  | 74  | 88  | 4.00E-03 |
| cg20732367 | <i>LRRFIP1</i>  | -3.374 | 36  | 126 | 4.00E-03 |
| cg01095482 | <i>TIE1</i>     | 2.567  | 74  | 88  | 4.00E-03 |
| cg17860186 | <i>PLEKHG2</i>  | -4.054 | 19  | 143 | 4.00E-03 |
| cg05671018 | <i>LYSMD2</i>   | 2.792  | 72  | 90  | 4.00E-03 |
| cg08819884 | <i>TRNT1</i>    | -4.524 | 104 | 58  | 4.00E-03 |
| cg20119015 | <i>CENTD1</i>   | -2.643 | 39  | 123 | 4.00E-03 |
| cg26143719 | <i>C1QTNF6</i>  | -0.169 | 102 | 60  | 4.00E-03 |
| cg18728606 | <i>MKNK2</i>    | -4.898 | 52  | 110 | 4.00E-03 |
| cg23818978 | <i>AMICA1</i>   | 0.743  | 123 | 32  | 4.01E-03 |
| cg09163442 | <i>SEC61G</i>   | -3.494 | 33  | 129 | 4.01E-03 |
| cg22836370 | <i>MBD2</i>     | -4.708 | 90  | 72  | 4.01E-03 |
| cg00745543 | <i>H1T2</i>     | 3.031  | 89  | 73  | 4.01E-03 |
| cg04123507 | <i>KRTHB6</i>   | 0.285  | 103 | 59  | 4.01E-03 |
| cg20433014 | <i>CYP1A1</i>   | -6.147 | 114 | 48  | 4.01E-03 |
| cg12398332 | <i>GPRC5B</i>   | -3.779 | 50  | 112 | 4.01E-03 |
| cg16708281 | <i>FOXD4L1</i>  | -0.741 | 101 | 61  | 4.01E-03 |
| cg22680204 | <i>CRMP1</i>    | -2.911 | 83  | 79  | 4.01E-03 |
| cg24305835 | <i>SDHB</i>     | -4.545 | 37  | 125 | 4.01E-03 |
| cg15298594 | <i>NAG</i>      | -5.436 | 114 | 48  | 4.01E-03 |
| cg05799317 | <i>C6orf118</i> | 2.597  | 133 | 29  | 4.02E-03 |
| cg12650926 | <i>ITPR3</i>    | -4.610 | 103 | 59  | 4.02E-03 |
| cg17805404 | <i>GPR162</i>   | -4.087 | 79  | 83  | 4.02E-03 |
| cg07750111 | <i>HIST1H1C</i> | -4.855 | 82  | 80  | 4.02E-03 |
| cg19670317 | <i>C17orf59</i> | -4.270 | 98  | 64  | 4.02E-03 |
| cg26755715 | <i>FEZ2</i>     | -4.342 | 71  | 91  | 4.02E-03 |
| cg14963897 | <i>NFS1</i>     | 3.292  | 86  | 76  | 4.02E-03 |
| cg13059335 | <i>ADAMDEC1</i> | 1.605  | 128 | 34  | 4.02E-03 |
| cg01522975 | <i>VPS45A</i>   | -4.642 | 109 | 53  | 4.03E-03 |
| cg18138500 | <i>GNG7</i>     | 0.235  | 70  | 92  | 4.03E-03 |
| cg16557944 | <i>GPX7</i>     | -6.639 | 121 | 41  | 4.03E-03 |
| cg01131735 | <i>SC65</i>     | -5.077 | 22  | 140 | 4.03E-03 |
| cg21516384 | <i>KIAA1618</i> | -4.327 | 62  | 100 | 4.03E-03 |
| cg24275354 | <i>NDUFA10</i>  | -5.316 | 60  | 102 | 4.03E-03 |
| cg08906015 | <i>MGC15476</i> | 0.292  | 49  | 113 | 4.04E-03 |
| cg20781140 | <i>GPR155</i>   | -4.549 | 53  | 109 | 4.04E-03 |
| cg09618387 | <i>TSKS</i>     | 1.200  | 56  | 106 | 4.04E-03 |
| cg17630127 | <i>MS4A5</i>    | 3.082  | 108 | 54  | 4.04E-03 |
| cg06224510 | <i>ITIH2</i>    | -0.163 | 122 | 40  | 4.04E-03 |
| cg05671350 | <i>P4HA3</i>    | -1.688 | 91  | 71  | 4.04E-03 |
| cg11976790 | <i>DMBT1</i>    | -2.425 | 64  | 97  | 4.04E-03 |
| cg03460682 | <i>CYP27A1</i>  | -3.760 | 65  | 97  | 4.04E-03 |

|            |                  |        |     |     |          |
|------------|------------------|--------|-----|-----|----------|
| cg03147990 | <i>ZNF585B</i>   | -3.614 | 97  | 65  | 4.05E-03 |
| cg10444350 | <i>SFRS1</i>     | -5.038 | 40  | 122 | 4.05E-03 |
| cg09360654 | <i>MUTYH</i>     | -1.851 | 11  | 151 | 4.05E-03 |
| cg11212609 | <i>DULLARD</i>   | -4.393 | 62  | 100 | 4.05E-03 |
| cg12126248 | <i>NDUFA5</i>    | -4.021 | 87  | 75  | 4.05E-03 |
| cg08583049 | <i>FOXB1</i>     | -4.947 | 88  | 74  | 4.05E-03 |
| cg00410576 | <i>MAPK6</i>     | -4.603 | 31  | 131 | 4.05E-03 |
| cg02305261 | <i>KCNG1</i>     | -2.189 | 44  | 118 | 4.05E-03 |
| cg16886188 | <i>ADRA2A</i>    | -5.123 | 107 | 55  | 4.05E-03 |
| cg22563815 | <i>CHRNA5</i>    | -0.085 | 132 | 30  | 4.05E-03 |
| cg15016234 | <i>TRIM62</i>    | -4.548 | 36  | 126 | 4.05E-03 |
| cg16016641 | <i>C20orf4</i>   | -3.775 | 70  | 92  | 4.05E-03 |
| cg20923575 | <i>MTMR4</i>     | -4.967 | 121 | 41  | 4.05E-03 |
| cg20919556 | <i>CNKSR3</i>    | -4.370 | 61  | 101 | 4.06E-03 |
| cg00165981 | <i>COL4A3BP</i>  | -4.271 | 80  | 82  | 4.06E-03 |
| cg05019661 | <i>ADK</i>       | -4.645 | 41  | 121 | 4.06E-03 |
| cg12263485 | <i>CBX5</i>      | -3.954 | 105 | 57  | 4.06E-03 |
| cg11582100 | <i>GAD1</i>      | -4.231 | 111 | 51  | 4.07E-03 |
| cg23352747 | <i>ALPL</i>      | -4.038 | 108 | 54  | 4.07E-03 |
| cg22571530 | <i>NFASC</i>     | -3.113 | 77  | 85  | 4.07E-03 |
| cg14672622 | <i>C2orf28</i>   | -4.602 | 106 | 56  | 4.08E-03 |
| cg01214209 | <i>MANEAL</i>    | 0.673  | 113 | 49  | 4.08E-03 |
| cg00424946 | <i>SNTB2</i>     | -4.936 | 42  | 120 | 4.08E-03 |
| cg16812893 | <i>KRTAP15-1</i> | 1.380  | 114 | 48  | 4.08E-03 |
| cg27208307 | <i>PRG1</i>      | -2.849 | 121 | 41  | 4.08E-03 |
| cg16924616 | <i>DLX5</i>      | -3.933 | 74  | 88  | 4.08E-03 |
| cg03414321 | <i>HCK</i>       | -3.670 | 105 | 57  | 4.09E-03 |
| cg14781919 | <i>GSG2</i>      | -6.055 | 73  | 89  | 4.09E-03 |
| cg08881067 | <i>GFM2</i>      | -4.888 | 41  | 121 | 4.09E-03 |
| cg20001829 | <i>TMEM25</i>    | -3.208 | 93  | 69  | 4.09E-03 |
| cg10106388 | <i>CD244</i>     | -1.600 | 43  | 119 | 4.09E-03 |
| cg12336540 | <i>RCSD1</i>     | -1.229 | 77  | 85  | 4.09E-03 |
| cg02601403 | <i>TBC1D3C</i>   | 1.924  | 68  | 94  | 4.09E-03 |
| cg11471666 | <i>EIF4B</i>     | -5.193 | 67  | 95  | 4.09E-03 |
| cg24488435 | <i>SMUG1</i>     | -4.160 | 78  | 84  | 4.09E-03 |
| cg21615127 | <i>TMCO4</i>     | -3.914 | 74  | 88  | 4.09E-03 |
| cg13185308 | <i>ABCC8</i>     | -0.304 | 82  | 80  | 4.09E-03 |
| cg17661881 | <i>PARP1</i>     | -5.369 | 57  | 105 | 4.09E-03 |
| cg15201599 | <i>COG3</i>      | -4.632 | 71  | 91  | 4.10E-03 |
| cg20098478 | <i>WIF1</i>      | 1.500  | 85  | 77  | 4.10E-03 |
| cg27221338 | <i>KDEL2</i>     | 2.482  | 57  | 105 | 4.10E-03 |
| cg01401376 | <i>EYA4</i>      | -4.881 | 86  | 76  | 4.10E-03 |
| cg16542081 | <i>GATA5</i>     | 2.745  | 94  | 68  | 4.10E-03 |
| cg03159785 | <i>SKIL</i>      | -6.089 | 88  | 74  | 4.11E-03 |
| cg03642518 | <i>PNOC</i>      | -0.019 | 96  | 66  | 4.11E-03 |
| cg24009736 | <i>GALGT</i>     | -4.199 | 83  | 79  | 4.11E-03 |
| cg07401901 | <i>DAAM1</i>     | -5.191 | 73  | 89  | 4.11E-03 |
| cg18672421 | <i>TMED10</i>    | -5.110 | 47  | 115 | 4.11E-03 |
| cg00171161 | <i>NUDT9</i>     | -3.541 | 109 | 53  | 4.12E-03 |
| cg21578207 | <i>C1orf164</i>  | -0.435 | 53  | 108 | 4.12E-03 |
| cg01272601 | <i>AAK1</i>      | -4.507 | 80  | 82  | 4.12E-03 |
| cg24693053 | <i>MFSD7</i>     | -1.223 | 38  | 124 | 4.12E-03 |
| cg12361925 | <i>C2orf17</i>   | -4.369 | 58  | 104 | 4.12E-03 |
| cg13617705 | <i>SMEK2</i>     | -4.144 | 106 | 56  | 4.12E-03 |
| cg10661591 | <i>TFG</i>       | -4.187 | 69  | 93  | 4.14E-03 |

|            |                 |        |     |     |          |
|------------|-----------------|--------|-----|-----|----------|
| cg08025786 | <i>CLK3</i>     | 2.689  | 67  | 95  | 4.14E-03 |
| cg25475171 | <i>SV2B</i>     | -5.212 | 115 | 47  | 4.14E-03 |
| cg09932694 | <i>ATAD3A</i>   | -3.141 | 61  | 100 | 4.15E-03 |
| cg05500074 | <i>TSKS</i>     | 1.681  | 36  | 126 | 4.15E-03 |
| cg04326040 | <i>VPS53</i>    | -4.069 | 75  | 87  | 4.15E-03 |
| cg23299127 | <i>MAP3K6</i>   | -3.960 | 96  | 66  | 4.15E-03 |
| cg27011042 | <i>MFGE8</i>    | -4.064 | 43  | 119 | 4.15E-03 |
| cg12916723 | <i>NKG7</i>     | 1.423  | 48  | 114 | 4.16E-03 |
| cg20326867 | <i>STIM2</i>    | -5.944 | 95  | 67  | 4.16E-03 |
| cg11930592 | <i>MSX1</i>     | -5.797 | 98  | 64  | 4.16E-03 |
| cg15087147 | <i>LRRC4</i>    | -5.088 | 41  | 121 | 4.16E-03 |
| cg02955988 | <i>FLJ21106</i> | 0.615  | 38  | 124 | 4.16E-03 |
| cg01328164 | <i>HINT2</i>    | -5.751 | 81  | 81  | 4.16E-03 |
| cg05399360 | <i>MICB</i>     | -4.748 | 79  | 83  | 4.17E-03 |
| cg19977912 | <i>PIGQ</i>     | -4.596 | 21  | 141 | 4.17E-03 |
| cg00309204 | <i>C17orf61</i> | -4.878 | 83  | 79  | 4.17E-03 |
| cg06377278 | <i>RUNX3</i>    | -5.388 | 93  | 69  | 4.17E-03 |
| cg15021292 | <i>PIK3R1</i>   | 1.661  | 100 | 62  | 4.17E-03 |
| cg21885525 | <i>SCYE1</i>    | -1.988 | 93  | 69  | 4.17E-03 |
| cg14845091 | <i>ADPRHL1</i>  | 1.632  | 42  | 120 | 4.17E-03 |
| cg22832044 | <i>CDH1</i>     | -2.448 | 99  | 63  | 4.17E-03 |
| cg23004625 | <i>PIGM</i>     | -3.693 | 79  | 83  | 4.17E-03 |
| cg14060828 | <i>TIP39</i>    | -2.014 | 141 | 21  | 4.17E-03 |
| cg08810065 | <i>KIAA1333</i> | -5.310 | 60  | 102 | 4.18E-03 |
| cg16381752 | <i>TOR1AIP2</i> | -4.613 | 114 | 48  | 4.18E-03 |
| cg14155482 | <i>PIP5K1A</i>  | -4.948 | 120 | 42  | 4.18E-03 |
| cg18114671 | <i>NOL4</i>     | -3.565 | 96  | 66  | 4.18E-03 |
| cg17263089 | <i>SLC25A3</i>  | 1.590  | 95  | 67  | 4.19E-03 |
| cg27261136 | <i>ARL8A</i>    | -5.292 | 81  | 81  | 4.19E-03 |
| cg26985289 | <i>CLSTN1</i>   | -3.137 | 64  | 98  | 4.19E-03 |
| cg07973395 | <i>BLM</i>      | -4.591 | 55  | 107 | 4.19E-03 |
| cg14222233 | <i>PFKFB3</i>   | -5.362 | 81  | 81  | 4.19E-03 |
| cg27016307 | <i>HRC</i>      | -1.177 | 138 | 24  | 4.20E-03 |
| cg27109647 | <i>PSMC2</i>    | -4.009 | 86  | 76  | 4.20E-03 |
| cg09498106 | <i>RENT1</i>    | -4.801 | 43  | 119 | 4.20E-03 |
| cg25512587 | <i>SLC2A6</i>   | -3.360 | 60  | 102 | 4.20E-03 |
| cg13246654 | <i>CAMK2D</i>   | -5.525 | 57  | 105 | 4.21E-03 |
| cg18230771 | <i>AGC1</i>     | -4.429 | 54  | 108 | 4.22E-03 |
| cg19099850 | <i>LGALS3</i>   | -4.959 | 64  | 98  | 4.22E-03 |
| cg04632671 | <i>PPARG</i>    | -4.932 | 90  | 72  | 4.22E-03 |
| cg20239740 | <i>SYT5</i>     | -4.673 | 105 | 57  | 4.22E-03 |
| cg26420196 | <i>GAS6</i>     | -4.930 | 70  | 92  | 4.23E-03 |
| cg12762680 | <i>PSMB9</i>    | -4.222 | 43  | 119 | 4.23E-03 |
| cg03724445 | <i>PRKRA</i>    | -4.894 | 102 | 60  | 4.23E-03 |
| cg19635695 | <i>PDE6C</i>    | 0.891  | 75  | 87  | 4.23E-03 |
| cg06554928 | <i>PFN1</i>     | -3.927 | 56  | 106 | 4.23E-03 |
| cg14847688 | <i>GPR135</i>   | -5.406 | 86  | 76  | 4.23E-03 |
| cg05895453 | <i>KBTBD7</i>   | -0.436 | 66  | 96  | 4.24E-03 |
| cg00043004 | <i>NOXO1</i>    | -3.729 | 84  | 78  | 4.24E-03 |
| cg24593475 | <i>SNAI2</i>    | -5.238 | 92  | 70  | 4.25E-03 |
| cg04824341 | <i>CHCHD8</i>   | -4.895 | 117 | 45  | 4.25E-03 |
| cg25371088 | <i>MRPL24</i>   | -4.031 | 91  | 71  | 4.25E-03 |
| cg21570220 | <i>SLC11A2</i>  | -1.928 | 76  | 86  | 4.25E-03 |
| cg21161651 | <i>C11orf48</i> | -5.498 | 60  | 102 | 4.26E-03 |
| cg14174099 | <i>SLC8A3</i>   | -5.532 | 93  | 69  | 4.26E-03 |

|            |                  |        |     |     |          |
|------------|------------------|--------|-----|-----|----------|
| cg23003881 | <i>FAM44B</i>    | -3.973 | 96  | 66  | 4.26E-03 |
| cg03889226 | <i>OLIG3</i>     | -3.739 | 91  | 71  | 4.26E-03 |
| cg00216758 | <i>C11orf35</i>  | -4.227 | 57  | 105 | 4.26E-03 |
| cg08797106 | <i>HIST1H3A</i>  | -2.456 | 99  | 63  | 4.26E-03 |
| cg21570468 | <i>RBL1</i>      | -4.849 | 35  | 127 | 4.26E-03 |
| cg11504740 | <i>GPR152</i>    | 1.110  | 39  | 123 | 4.27E-03 |
| cg06798189 | <i>SLC4A7</i>    | 1.097  | 90  | 70  | 4.27E-03 |
| cg08605641 | <i>PLEKHF2</i>   | -4.864 | 72  | 90  | 4.27E-03 |
| cg05334239 | <i>CCDC32</i>    | -3.759 | 132 | 30  | 4.27E-03 |
| cg12351433 | <i>LHCGR</i>     | -2.402 | 118 | 44  | 4.27E-03 |
| cg04001842 | <i>LOC405753</i> | -4.064 | 75  | 87  | 4.27E-03 |
| cg16211684 | <i>PCDH21</i>    | -4.191 | 53  | 109 | 4.27E-03 |
| cg14304761 | <i>SYK</i>       | -4.398 | 65  | 97  | 4.27E-03 |
| cg25307902 | <i>SNAP25</i>    | -3.580 | 67  | 95  | 4.28E-03 |
| cg10846922 | <i>RAB9P1</i>    | 1.782  | 125 | 37  | 4.28E-03 |
| cg04270799 | <i>KIF5A</i>     | -3.351 | 89  | 73  | 4.28E-03 |
| cg21426387 | <i>SNN</i>       | -5.688 | 91  | 71  | 4.28E-03 |
| cg06242000 | <i>MGC2408</i>   | -3.599 | 77  | 85  | 4.28E-03 |
| cg08773844 | <i>CCDC25</i>    | -5.611 | 66  | 96  | 4.28E-03 |
| cg17671157 | <i>KCNK10</i>    | -4.159 | 102 | 60  | 4.28E-03 |
| cg05788437 | <i>FYTTD1</i>    | -5.247 | 72  | 90  | 4.28E-03 |
| cg11248491 | <i>PSCD3</i>     | -4.269 | 91  | 71  | 4.28E-03 |
| cg18719571 | <i>DTNBP1</i>    | 2.228  | 74  | 88  | 4.28E-03 |
| cg27555365 | <i>TMEM102</i>   | -4.521 | 68  | 94  | 4.28E-03 |
| cg11276198 | <i>KRAS</i>      | -5.490 | 89  | 73  | 4.28E-03 |
| cg10789261 | <i>LARP5</i>     | 1.689  | 83  | 79  | 4.28E-03 |
| cg11286618 | <i>WBP1</i>      | -4.613 | 70  | 92  | 4.29E-03 |
| cg11442050 | <i>EIF4ENIF1</i> | -4.870 | 99  | 63  | 4.29E-03 |
| cg16882703 | <i>PSMB6</i>     | -1.737 | 59  | 103 | 4.29E-03 |
| cg10531372 | <i>FAM71A</i>    | 2.339  | 68  | 94  | 4.29E-03 |
| cg07671976 | <i>TNFRSF18</i>  | -3.346 | 121 | 41  | 4.29E-03 |
| cg08999352 | <i>CDK9</i>      | -2.339 | 86  | 76  | 4.29E-03 |
| cg01936124 | <i>ETF1</i>      | -5.107 | 46  | 116 | 4.29E-03 |
| cg03804500 | <i>SSNA1</i>     | 3.579  | 68  | 94  | 4.29E-03 |
| cg25889160 | <i>SERPINA5</i>  | 2.618  | 128 | 34  | 4.29E-03 |
| cg17978274 | <i>C15orf32</i>  | 2.869  | 54  | 108 | 4.29E-03 |
| cg15991288 | <i>WDR47</i>     | -5.227 | 68  | 94  | 4.29E-03 |
| cg25372103 | <i>DLL1</i>      | -2.310 | 97  | 65  | 4.30E-03 |
| cg02825709 | <i>ZNF75A</i>    | 2.283  | 46  | 116 | 4.30E-03 |
| cg09964921 | <i>KCNE1</i>     | 1.859  | 29  | 133 | 4.30E-03 |
| cg02749825 | <i>COMTD1</i>    | -5.160 | 58  | 104 | 4.30E-03 |
| cg12832649 | <i>SPOCK</i>     | -3.088 | 84  | 78  | 4.30E-03 |
| cg04393897 | <i>BAT2D1</i>    | -3.961 | 81  | 81  | 4.30E-03 |
| cg15783027 | <i>NFKBIL2</i>   | -3.904 | 45  | 117 | 4.30E-03 |
| cg07376535 | <i>ADCYAP1</i>   | -3.408 | 107 | 55  | 4.31E-03 |
| cg02198582 | <i>TSC2</i>      | 3.227  | 51  | 111 | 4.31E-03 |
| cg16641915 | <i>CAPN5</i>     | -4.865 | 93  | 69  | 4.31E-03 |
| cg10073042 |                  | 1.387  | 59  | 103 | 4.31E-03 |
| cg23218877 | <i>C10orf9</i>   | 1.535  | 79  | 83  | 4.31E-03 |
| cg00495442 | <i>KIAA1219</i>  | -4.054 | 73  | 89  | 4.31E-03 |
| cg13784855 | <i>PVT1</i>      | -3.795 | 52  | 110 | 4.31E-03 |
| cg00547829 | <i>TUBD1</i>     | -5.129 | 115 | 47  | 4.32E-03 |
| cg06090351 | <i>ADSS</i>      | -3.972 | 76  | 86  | 4.32E-03 |
| cg23074401 | <i>DDX10</i>     | -5.209 | 79  | 83  | 4.32E-03 |
| cg25245322 | <i>OBFC2B</i>    | -3.816 | 45  | 117 | 4.32E-03 |

|            |                  |        |     |     |          |
|------------|------------------|--------|-----|-----|----------|
| cg10435003 | <i>MSH5</i>      | -5.029 | 80  | 82  | 4.32E-03 |
| cg00080012 | <i>EED</i>       | -5.809 | 47  | 115 | 4.32E-03 |
| cg01897036 | <i>SCTR</i>      | 2.292  | 151 | 11  | 4.33E-03 |
| cg21375825 | <i>LCT</i>       | 2.464  | 81  | 81  | 4.33E-03 |
| cg25936385 | <i>FAIM2</i>     | 3.331  | 70  | 92  | 4.33E-03 |
| cg19254235 | <i>RB1</i>       | 0.414  | 102 | 60  | 4.33E-03 |
| cg00901652 | <i>SH2BP1</i>    | -4.858 | 136 | 26  | 4.34E-03 |
| cg06507645 | <i>SUGT1</i>     | -4.179 | 96  | 66  | 4.34E-03 |
| cg15612546 | <i>RPS6KC1</i>   | -5.378 | 100 | 62  | 4.34E-03 |
| cg15731815 | <i>C1orf188</i>  | -0.479 | 79  | 83  | 4.34E-03 |
| cg07027513 | <i>B4GALT6</i>   | -3.699 | 76  | 86  | 4.34E-03 |
| cg13896269 | <i>ZFAND2A</i>   | -4.647 | 99  | 63  | 4.34E-03 |
| cg09081544 | <i>MUC13</i>     | 2.065  | 52  | 110 | 4.34E-03 |
| cg16923271 | <i>POLD1</i>     | -3.561 | 26  | 136 | 4.35E-03 |
| cg14272175 | <i>PXK</i>       | -5.598 | 96  | 66  | 4.35E-03 |
| cg02105034 | <i>SMG7</i>      | -4.855 | 103 | 59  | 4.35E-03 |
| cg26590537 | <i>KCNA1</i>     | -3.815 | 74  | 88  | 4.36E-03 |
| cg12958778 | <i>TBC1D14</i>   | -0.101 | 26  | 136 | 4.36E-03 |
| cg21605986 | <i>KIAA1191</i>  | -5.508 | 71  | 91  | 4.37E-03 |
| cg21353232 | <i>SEZ6L</i>     | -3.136 | 105 | 57  | 4.37E-03 |
| cg00177013 | <i>ARFRP1</i>    | -3.310 | 66  | 96  | 4.37E-03 |
| cg25544551 | <i>NFYB</i>      | -5.944 | 87  | 75  | 4.37E-03 |
| cg02803836 | <i>MGMT</i>      | 3.411  | 61  | 101 | 4.38E-03 |
| cg23372001 | <i>HIST1H4J</i>  | -3.956 | 110 | 52  | 4.38E-03 |
| cg04809136 | <i>SF3B14</i>    | -4.131 | 41  | 121 | 4.38E-03 |
| cg17404081 | <i>SAPS3</i>     | -5.001 | 54  | 108 | 4.38E-03 |
| cg24000099 | <i>LOC221955</i> | -6.169 | 110 | 52  | 4.38E-03 |
| cg15169162 | <i>RDS</i>       | 2.843  | 30  | 132 | 4.38E-03 |
| cg06484397 | <i>C9orf19</i>   | -5.128 | 63  | 99  | 4.38E-03 |
| cg10713320 | <i>CLDND1</i>    | -3.895 | 106 | 56  | 4.38E-03 |
| cg16660717 | <i>ORMDL2</i>    | -4.840 | 37  | 125 | 4.38E-03 |
| cg02094237 | <i>HIST4H4</i>   | -3.787 | 41  | 121 | 4.38E-03 |
| cg01747191 | <i>C6orf182</i>  | 2.798  | 60  | 102 | 4.39E-03 |
| cg13244707 | <i>UQCRC2</i>    | -4.225 | 74  | 88  | 4.39E-03 |
| cg07389922 | <i>C17orf81</i>  | -4.057 | 91  | 71  | 4.39E-03 |
| cg27318281 | <i>C18orf37</i>  | 2.449  | 92  | 70  | 4.39E-03 |
| cg00648153 | <i>SLC17A5</i>   | -4.449 | 88  | 74  | 4.39E-03 |
| cg22177707 | <i>FLJ30655</i>  | -5.432 | 49  | 113 | 4.40E-03 |
| cg15931943 | <i>FHIT</i>      | -4.746 | 106 | 56  | 4.40E-03 |
| cg17277939 | <i>MGC13168</i>  | 3.299  | 50  | 112 | 4.40E-03 |
| cg22149792 | <i>KIAA1641</i>  | 0.127  | 128 | 34  | 4.40E-03 |
| cg23911972 | <i>C12orf44</i>  | -6.129 | 85  | 77  | 4.41E-03 |
| cg26332534 | <i>HTR7</i>      | -3.837 | 33  | 129 | 4.41E-03 |
| cg12847373 | <i>EDNRB</i>     | -4.978 | 71  | 91  | 4.42E-03 |
| cg26616347 | <i>IRF5</i>      | -1.773 | 29  | 133 | 4.42E-03 |
| cg27561421 | <i>BZW1</i>      | -5.619 | 69  | 93  | 4.42E-03 |
| cg25026754 | <i>PDCD7</i>     | -5.006 | 95  | 67  | 4.42E-03 |
| cg25955816 | <i>HIST3H3</i>   | 1.561  | 53  | 109 | 4.42E-03 |
| cg26091679 | <i>PCGF1</i>     | -3.673 | 28  | 134 | 4.43E-03 |
| cg14453641 | <i>AGL</i>       | -4.202 | 44  | 118 | 4.43E-03 |
| cg22658985 | <i>WDR40A</i>    | -5.235 | 94  | 68  | 4.43E-03 |
| cg12347740 | <i>MGC34647</i>  | 1.632  | 82  | 80  | 4.43E-03 |
| cg22438324 | <i>APEX1</i>     | -6.085 | 99  | 63  | 4.43E-03 |
| cg26615830 | <i>MSX1</i>      | -5.202 | 91  | 71  | 4.43E-03 |
| cg26738010 | <i>CETN1</i>     | 2.676  | 71  | 91  | 4.43E-03 |

|            |                  |        |     |     |          |
|------------|------------------|--------|-----|-----|----------|
| cg13931228 | <i>MPP6</i>      | -4.593 | 74  | 88  | 4.44E-03 |
| cg26147132 | <i>PIGS</i>      | -3.389 | 54  | 108 | 4.44E-03 |
| cg21756353 | <i>DHPS</i>      | -5.527 | 37  | 125 | 4.44E-03 |
| cg25040282 | <i>HTN3</i>      | 1.449  | 127 | 35  | 4.45E-03 |
| cg05380910 | <i>STOML3</i>    | 1.715  | 13  | 149 | 4.45E-03 |
| cg03776464 | <i>EPHA4</i>     | -5.119 | 39  | 123 | 4.45E-03 |
| cg05728656 | <i>C6orf47</i>   | -5.159 | 52  | 110 | 4.45E-03 |
| cg17741572 | <i>CFB</i>       | 1.704  | 71  | 91  | 4.46E-03 |
| cg17880199 | <i>MYH11</i>     | -4.804 | 64  | 98  | 4.46E-03 |
| cg11944393 | <i>CSPG6</i>     | -4.872 | 101 | 61  | 4.46E-03 |
| cg21974996 | <i>C14orf156</i> | -4.423 | 74  | 88  | 4.46E-03 |
| cg04706338 | <i>VTN</i>       | 0.544  | 50  | 112 | 4.46E-03 |
| cg01139966 | <i>GOLPH3L</i>   | -4.847 | 84  | 78  | 4.46E-03 |
| cg06885524 | <i>CYBRD1</i>    | -5.931 | 53  | 109 | 4.46E-03 |
| cg07043494 | <i>HRH1</i>      | 1.283  | 98  | 64  | 4.46E-03 |
| cg02845923 | <i>C12orf26</i>  | 2.650  | 42  | 120 | 4.46E-03 |
| cg05056120 | <i>EBF</i>       | -2.809 | 108 | 54  | 4.47E-03 |
| cg16069236 | <i>MRPL39</i>    | -4.308 | 55  | 107 | 4.47E-03 |
| cg16491909 | <i>C1orf43</i>   | -4.730 | 68  | 94  | 4.47E-03 |
| cg26940725 | <i>RPL21</i>     | -4.056 | 128 | 34  | 4.47E-03 |
| cg07297178 | <i>CEACAM7</i>   | 2.377  | 94  | 68  | 4.47E-03 |
| cg26682717 | <i>ATP6V1F</i>   | -5.746 | 61  | 101 | 4.47E-03 |
| cg05395196 | <i>HSF2</i>      | -5.237 | 55  | 107 | 4.47E-03 |
| cg06960698 | <i>FGF14</i>     | -2.827 | 108 | 54  | 4.47E-03 |
| cg24928161 | <i>SHBG</i>      | 2.464  | 106 | 56  | 4.47E-03 |
| cg08377000 | <i>TIGD2</i>     | 1.447  | 29  | 133 | 4.48E-03 |
| cg06504820 | <i>DLK1</i>      | 1.719  | 60  | 102 | 4.48E-03 |
| cg06540715 | <i>ANKRD10</i>   | -3.137 | 42  | 120 | 4.48E-03 |
| cg08110559 | <i>KCTD9</i>     | -3.657 | 117 | 45  | 4.49E-03 |
| cg00620629 | <i>C6orf113</i>  | -5.444 | 77  | 85  | 4.49E-03 |
| cg26093687 | <i>EIF3S2</i>    | 2.741  | 42  | 120 | 4.49E-03 |
| cg26205131 | <i>SLC6A3</i>    | -4.743 | 102 | 60  | 4.49E-03 |
| cg27638672 | <i>PIGB</i>      | -2.405 | 42  | 120 | 4.49E-03 |
| cg17092062 | <i>SLC35C1</i>   | -5.044 | 78  | 84  | 4.49E-03 |
| cg26416466 | <i>MEGF11</i>    | -3.217 | 90  | 72  | 4.49E-03 |
| cg07091552 | <i>UCP3</i>      | 2.576  | 83  | 79  | 4.49E-03 |
| cg13352306 | <i>ROM1</i>      | 2.658  | 99  | 63  | 4.50E-03 |
| cg10347418 | <i>ZNF436</i>    | 2.162  | 151 | 11  | 4.50E-03 |
| cg25355803 | <i>MARVELD1</i>  | 0.352  | 41  | 121 | 4.50E-03 |
| cg00885506 | <i>WDR31</i>     | -4.031 | 99  | 63  | 4.50E-03 |
| cg16732880 | <i>NARFL</i>     | -5.462 | 55  | 107 | 4.50E-03 |
| cg18885999 | <i>CMPK</i>      | -5.201 | 112 | 50  | 4.50E-03 |
| cg03862540 | <i>PPP4R1</i>    | -5.228 | 77  | 85  | 4.50E-03 |
| cg00770279 | <i>CDKN2D</i>    | -5.418 | 70  | 92  | 4.51E-03 |
| cg26049501 | <i>STARD13</i>   | -3.211 | 76  | 86  | 4.51E-03 |
| cg06734828 | <i>KIAA0251</i>  | -5.512 | 53  | 109 | 4.51E-03 |
| cg13074965 | <i>MGC15912</i>  | 2.980  | 105 | 57  | 4.51E-03 |
| cg10065416 | <i>MPP3</i>      | -4.611 | 78  | 84  | 4.52E-03 |
| cg01418124 | <i>ARHGAP24</i>  | -4.225 | 35  | 127 | 4.52E-03 |
| cg26357453 | <i>DHRS7B</i>    | -4.220 | 65  | 97  | 4.52E-03 |
| cg09381003 | <i>SHKBP1</i>    | -2.538 | 108 | 54  | 4.52E-03 |
| cg22794078 | <i>C15orf44</i>  | -3.884 | 76  | 86  | 4.52E-03 |
| cg19159162 | <i>HSPA1B</i>    | -5.010 | 48  | 114 | 4.52E-03 |
| cg04848046 | <i>FND3C3B</i>   | 2.446  | 86  | 76  | 4.53E-03 |
| cg12864853 | <i>TPBG</i>      | -3.495 | 67  | 95  | 4.53E-03 |

|            |                 |        |     |     |          |
|------------|-----------------|--------|-----|-----|----------|
| cg15703357 | <i>LINCR</i>    | 0.167  | 74  | 88  | 4.53E-03 |
| cg08223235 | <i>BCL2</i>     | 1.873  | 73  | 89  | 4.54E-03 |
| cg22660544 | <i>RPS11</i>    | -4.718 | 36  | 126 | 4.54E-03 |
| cg09492887 | <i>SLC26A5</i>  | -3.050 | 76  | 86  | 4.54E-03 |
| cg09906309 | <i>C11orf46</i> | -3.807 | 114 | 48  | 4.54E-03 |
| cg25131727 | <i>PTS</i>      | -5.161 | 56  | 106 | 4.54E-03 |
| cg05107152 | <i>KLC4</i>     | -3.488 | 69  | 93  | 4.54E-03 |
| cg10837843 | <i>DUSP1</i>    | -3.815 | 34  | 128 | 4.54E-03 |
| cg14337900 | <i>MYH9</i>     | -4.402 | 64  | 98  | 4.54E-03 |
| cg14898779 | <i>STK31</i>    | 2.744  | 60  | 102 | 4.54E-03 |
| cg20543416 | <i>MMP25</i>    | -5.151 | 87  | 75  | 4.54E-03 |
| cg00359325 | <i>USP4</i>     | -4.050 | 24  | 138 | 4.55E-03 |
| cg17818900 | <i>CRIP2</i>    | -5.049 | 75  | 87  | 4.55E-03 |
| cg03742272 | <i>ALOX12B</i>  | 1.367  | 86  | 76  | 4.55E-03 |
| cg18580491 | <i>EIF2C4</i>   | -5.664 | 46  | 116 | 4.55E-03 |
| cg06295856 | <i>CALCA</i>    | -3.111 | 96  | 66  | 4.55E-03 |
| cg25118574 | <i>PSMB7</i>    | -4.240 | 53  | 109 | 4.55E-03 |
| cg12339802 | <i>C1orf109</i> | -2.228 | 25  | 137 | 4.55E-03 |
| cg09277365 | <i>FLJ90709</i> | -4.078 | 52  | 110 | 4.55E-03 |
| cg02699167 | <i>FBXL2</i>    | -5.341 | 132 | 30  | 4.56E-03 |
| cg04836038 | <i>DOCK9</i>    | -2.938 | 26  | 136 | 4.56E-03 |
| cg01775414 | <i>PHF21B</i>   | -3.995 | 75  | 87  | 4.56E-03 |
| cg14706178 | <i>FLJ32786</i> | -6.092 | 55  | 107 | 4.56E-03 |
| cg19211827 | <i>ANG</i>      | -4.946 | 136 | 26  | 4.56E-03 |
| cg09658342 | <i>TIA1</i>     | -4.002 | 33  | 129 | 4.56E-03 |
| cg23097006 | <i>VSX1</i>     | -3.418 | 98  | 64  | 4.56E-03 |
| cg12737801 | <i>TCEA1</i>    | -4.482 | 98  | 64  | 4.56E-03 |
| cg18239253 | <i>DEFB32</i>   | 0.832  | 68  | 94  | 4.57E-03 |
| cg20691408 | <i>FADS3</i>    | -3.030 | 48  | 114 | 4.57E-03 |
| cg13645811 | <i>SYNJ2</i>    | -1.938 | 42  | 120 | 4.57E-03 |
| cg12603043 | <i>EHD2</i>     | -5.225 | 81  | 81  | 4.58E-03 |
| cg17943999 | <i>GEM</i>      | -3.911 | 105 | 57  | 4.58E-03 |
| cg23208881 | <i>FURIN</i>    | 2.215  | 102 | 60  | 4.58E-03 |
| cg00119079 | <i>LAMP3</i>    | -4.412 | 71  | 91  | 4.58E-03 |
| cg14472778 | <i>MTHFR</i>    | 0.006  | 114 | 48  | 4.58E-03 |
| cg10141022 | <i>BRAF</i>     | -4.489 | 86  | 76  | 4.59E-03 |
| cg10719920 | <i>C21orf93</i> | 3.749  | 34  | 128 | 4.59E-03 |
| cg22814247 | <i>SIRT2</i>    | -5.046 | 47  | 115 | 4.59E-03 |
| cg17653969 | <i>SPHAR</i>    | 1.596  | 128 | 34  | 4.60E-03 |
| cg14139633 | <i>SLC27A4</i>  | -5.591 | 74  | 88  | 4.60E-03 |
| cg25377358 | <i>SEC23IP</i>  | -4.363 | 43  | 119 | 4.60E-03 |
| cg17921034 | <i>AKAP11</i>   | -4.778 | 94  | 68  | 4.60E-03 |
| cg04882759 | <i>MYOCD</i>    | 2.724  | 115 | 47  | 4.60E-03 |
| cg06325346 | <i>VN1R2</i>    | -0.763 | 120 | 42  | 4.60E-03 |
| cg21845297 | <i>OTOR</i>     | 1.082  | 132 | 29  | 4.60E-03 |
| cg03379131 | <i>ADAM15</i>   | -4.551 | 105 | 57  | 4.60E-03 |
| cg07424155 | <i>CAPZA2</i>   | -5.436 | 55  | 107 | 4.61E-03 |
| cg15453943 | <i>RAB9P1</i>   | 2.345  | 62  | 100 | 4.61E-03 |
| cg13948784 | <i>MGC11332</i> | -6.057 | 101 | 61  | 4.61E-03 |
| cg25152348 | <i>hCAP-H2</i>  | -5.002 | 93  | 69  | 4.61E-03 |
| cg15612436 | <i>MPPED1</i>   | -0.991 | 73  | 89  | 4.61E-03 |
| cg03874886 | <i>FLJ14397</i> | -5.905 | 85  | 77  | 4.62E-03 |
| cg25995916 | <i>PRDM4</i>    | -3.882 | 78  | 84  | 4.62E-03 |
| cg26220350 | <i>PLTP</i>     | -3.440 | 49  | 113 | 4.62E-03 |
| cg05360220 | <i>TNFRSF14</i> | -4.159 | 51  | 111 | 4.62E-03 |

|            |                   |        |     |     |          |
|------------|-------------------|--------|-----|-----|----------|
| cg10217445 | <i>OLIG2</i>      | -3.034 | 91  | 71  | 4.62E-03 |
| cg03410718 | <i>FLJ45684</i>   | 3.332  | 70  | 92  | 4.62E-03 |
| cg27336379 | <i>SLC44A5</i>    | 2.302  | 75  | 87  | 4.63E-03 |
| cg16411152 | <i>ADAM29</i>     | 1.612  | 132 | 30  | 4.64E-03 |
| cg16509658 | <i>GABRB2</i>     | -4.723 | 96  | 66  | 4.64E-03 |
| cg26774430 | <i>PSCD3</i>      | -4.463 | 97  | 65  | 4.64E-03 |
| cg18090228 | <i>MAK10</i>      | -4.134 | 62  | 100 | 4.64E-03 |
| cg05261289 | <i>STARD7</i>     | -5.142 | 86  | 76  | 4.64E-03 |
| cg02376163 | <i>FBXO38</i>     | -3.997 | 45  | 117 | 4.64E-03 |
| cg02453653 | <i>KIAA1698</i>   | -4.586 | 73  | 89  | 4.64E-03 |
| cg10564498 | <i>AXL</i>        | -2.580 | 86  | 76  | 4.64E-03 |
| cg23637943 | <i>PSMA5</i>      | -4.970 | 81  | 81  | 4.65E-03 |
| cg11386709 | <i>EPB41L2</i>    | 2.765  | 82  | 80  | 4.65E-03 |
| cg02511532 | <i>TAF2</i>       | -5.080 | 74  | 88  | 4.65E-03 |
| cg01265637 | <i>C20orf141</i>  | 2.847  | 98  | 64  | 4.65E-03 |
| cg25092328 | <i>PXMP4</i>      | -4.810 | 55  | 107 | 4.65E-03 |
| cg00518989 | <i>LIMK2</i>      | -4.910 | 129 | 33  | 4.65E-03 |
| cg15873633 | <i>ZNF37A</i>     | -3.664 | 52  | 110 | 4.65E-03 |
| cg01557989 | <i>SLC24A3</i>    | -4.342 | 76  | 86  | 4.65E-03 |
| cg09593402 | <i>LNPEP</i>      | -5.202 | 82  | 80  | 4.65E-03 |
| cg19574623 | <i>SSPN</i>       | -2.513 | 72  | 90  | 4.65E-03 |
| cg00056767 | <i>FLJ38725</i>   | -4.345 | 97  | 65  | 4.65E-03 |
| cg24840099 | <i>MSX1</i>       | 0.018  | 132 | 30  | 4.66E-03 |
| cg25905459 | <i>LOC51136</i>   | -4.087 | 88  | 74  | 4.66E-03 |
| cg17136126 | <i>ZNF71</i>      | -4.493 | 92  | 70  | 4.66E-03 |
| cg25732252 | <i>ST6GALNAC4</i> | 0.004  | 126 | 36  | 4.66E-03 |
| cg18306327 | <i>BFAR</i>       | -3.223 | 37  | 125 | 4.66E-03 |
| cg14448864 | <i>NAT6</i>       | -5.209 | 86  | 76  | 4.67E-03 |
| cg19307060 | <i>FAM10A4</i>    | 2.895  | 80  | 82  | 4.67E-03 |
| cg26282384 | <i>PCDHGB4</i>    | -3.389 | 53  | 109 | 4.67E-03 |
| cg14966252 | <i>ZNF622</i>     | -4.144 | 68  | 94  | 4.67E-03 |
| cg27253386 | <i>BRCA2</i>      | -6.086 | 86  | 76  | 4.67E-03 |
| cg24740435 | <i>UBR2</i>       | -4.883 | 98  | 64  | 4.67E-03 |
| cg08788717 | <i>STK33</i>      | -6.066 | 62  | 100 | 4.67E-03 |
| cg18216249 | <i>FLJ21908</i>   | -0.966 | 76  | 86  | 4.67E-03 |
| cg27586455 | <i>ZNF688</i>     | -4.784 | 107 | 55  | 4.67E-03 |
| cg18579447 | <i>MAP2K1IP1</i>  | -4.341 | 32  | 130 | 4.67E-03 |
| cg16137862 | <i>BCL2L1</i>     | -2.827 | 64  | 98  | 4.67E-03 |
| cg14282941 | <i>C14orf104</i>  | -4.421 | 83  | 79  | 4.68E-03 |
| cg04916200 | <i>RIC8B</i>      | -5.596 | 51  | 111 | 4.68E-03 |
| cg03077492 | <i>CCL28</i>      | 2.433  | 86  | 76  | 4.68E-03 |
| cg04898443 | <i>HDLBP</i>      | -4.700 | 93  | 69  | 4.68E-03 |
| cg13683440 | <i>MGC39662</i>   | -4.471 | 44  | 118 | 4.68E-03 |
| cg22967298 | <i>PCNP</i>       | -4.312 | 69  | 93  | 4.69E-03 |
| cg25946758 | <i>PHYHIPL</i>    | -3.210 | 87  | 75  | 4.69E-03 |
| cg10835876 | <i>DPT</i>        | 1.851  | 93  | 69  | 4.69E-03 |
| cg20434811 | <i>MGC39662</i>   | -4.493 | 28  | 134 | 4.69E-03 |
| cg07685869 | <i>KIFC3</i>      | -0.779 | 18  | 143 | 4.69E-03 |
| cg20684973 | <i>TAF5</i>       | -4.766 | 63  | 99  | 4.70E-03 |
| cg04623168 | <i>C12orf30</i>   | -5.661 | 51  | 111 | 4.70E-03 |
| cg01161611 | <i>GALNT13</i>    | 1.798  | 132 | 30  | 4.70E-03 |
| cg27626424 | <i>LOR</i>        | 3.246  | 73  | 89  | 4.70E-03 |
| cg02801485 | <i>ALS2CR2</i>    | -4.590 | 36  | 126 | 4.70E-03 |
| cg03536787 | <i>NSD1</i>       | -4.980 | 42  | 120 | 4.70E-03 |
| cg09034836 |                   | 3.259  | 82  | 80  | 4.70E-03 |

|            |                 |        |     |     |          |
|------------|-----------------|--------|-----|-----|----------|
| cg25546588 | <i>IL15</i>     | -4.237 | 69  | 93  | 4.70E-03 |
| cg08047457 | <i>RASSF1</i>   | -5.171 | 123 | 39  | 4.70E-03 |
| cg19754094 | <i>STAMBP</i>   | -4.892 | 57  | 105 | 4.71E-03 |
| cg07479491 | <i>BMP6</i>     | -4.048 | 37  | 125 | 4.71E-03 |
| cg07506795 | <i>ZNF19</i>    | 2.407  | 112 | 50  | 4.71E-03 |
| cg11609154 | <i>HSPC268</i>  | -4.364 | 60  | 102 | 4.71E-03 |
| cg22190819 | <i>C20orf91</i> | 0.673  | 80  | 82  | 4.71E-03 |
| cg05330360 | <i>ZBP2</i>     | 0.294  | 102 | 60  | 4.71E-03 |
| cg06186861 | <i>ZNF501</i>   | -3.612 | 76  | 86  | 4.71E-03 |
| cg18925548 | <i>MDK</i>      | -4.774 | 85  | 77  | 4.72E-03 |
| cg25973092 | <i>SESN2</i>    | -5.083 | 83  | 79  | 4.72E-03 |
| cg01318557 | <i>LAT2</i>     | -1.566 | 63  | 99  | 4.72E-03 |
| cg15776355 | <i>C1R</i>      | -2.223 | 86  | 76  | 4.73E-03 |
| cg17348931 | <i>SHFM1</i>    | -4.917 | 142 | 20  | 4.73E-03 |
| cg18231267 | <i>RUNX3</i>    | 4.010  | 22  | 140 | 4.73E-03 |
| cg22954818 | <i>APOBEC3A</i> | 1.244  | 44  | 118 | 4.73E-03 |
| cg03098361 | <i>RFC2</i>     | -5.519 | 94  | 68  | 4.73E-03 |
| cg16534499 | <i>ZNF223</i>   | -3.650 | 40  | 122 | 4.73E-03 |
| cg26170257 | <i>ZNF336</i>   | 1.766  | 115 | 47  | 4.73E-03 |
| cg11612345 | <i>SMOC2</i>    | -2.330 | 80  | 82  | 4.73E-03 |
| cg01513661 | <i>SAPS2</i>    | -3.152 | 110 | 52  | 4.73E-03 |
| cg23602684 | <i>NRL</i>      | -5.885 | 38  | 124 | 4.74E-03 |
| cg03992230 | <i>HNRPH1</i>   | -4.113 | 102 | 60  | 4.74E-03 |
| cg02245418 | <i>ZNF364</i>   | 2.071  | 120 | 42  | 4.74E-03 |
| cg26651830 | <i>BCAP29</i>   | -4.294 | 39  | 123 | 4.74E-03 |
| cg25047102 | <i>VKORC1</i>   | -5.729 | 56  | 106 | 4.74E-03 |
| cg26911787 | <i>ELK3</i>     | -3.632 | 68  | 94  | 4.74E-03 |
| cg19133903 | <i>AVPI1</i>    | -5.162 | 53  | 109 | 4.75E-03 |
| cg13343486 | <i>KLK10</i>    | -5.309 | 98  | 64  | 4.75E-03 |
| cg25255854 | <i>IRF2</i>     | -5.927 | 84  | 78  | 4.75E-03 |
| cg08670517 | <i>UBQLN1</i>   | -4.508 | 100 | 62  | 4.76E-03 |
| cg10442358 | <i>HRBL</i>     | -3.561 | 99  | 63  | 4.76E-03 |
| cg06701500 | <i>YWHAQ</i>    | -3.376 | 103 | 59  | 4.76E-03 |
| cg09394600 | <i>RABEP1</i>   | 3.157  | 57  | 105 | 4.76E-03 |
| cg23412875 | <i>ZNF263</i>   | -5.367 | 87  | 75  | 4.76E-03 |
| cg18731789 | <i>FKBP2</i>    | -3.851 | 72  | 90  | 4.76E-03 |
| cg22957381 | <i>KCND3</i>    | -4.253 | 100 | 62  | 4.76E-03 |
| cg18344063 | <i>MGAT4C</i>   | 1.188  | 120 | 42  | 4.76E-03 |
| cg03998173 | <i>RHEB</i>     | -5.220 | 83  | 79  | 4.76E-03 |
| cg07817698 | <i>DHODH</i>    | -3.572 | 56  | 106 | 4.77E-03 |
| cg09196959 | <i>TRIM40</i>   | -0.196 | 103 | 59  | 4.77E-03 |
| cg09580336 | <i>ATP1A1</i>   | -2.292 | 114 | 48  | 4.77E-03 |
| cg05751979 | <i>TCEB1</i>    | -4.274 | 56  | 106 | 4.78E-03 |
| cg00791249 | <i>MGC19604</i> | -3.811 | 74  | 88  | 4.79E-03 |
| cg06366981 | <i>HPGD</i>     | -5.120 | 61  | 101 | 4.79E-03 |
| cg19585196 | <i>GSG2</i>     | -4.675 | 113 | 49  | 4.80E-03 |
| cg00893987 | <i>RPL7L1</i>   | -4.765 | 42  | 120 | 4.80E-03 |
| cg04263186 | <i>TACR3</i>    | -1.948 | 34  | 128 | 4.80E-03 |
| cg04137128 | <i>SIN3A</i>    | -4.313 | 86  | 76  | 4.80E-03 |
| cg02643667 | <i>TFF1</i>     | 2.200  | 83  | 79  | 4.80E-03 |
| cg03883519 | <i>MGC33302</i> | -4.439 | 115 | 47  | 4.80E-03 |
| cg09635067 | <i>RAB7L1</i>   | -4.883 | 47  | 115 | 4.80E-03 |
| cg26766480 | <i>IFNA6</i>    | 1.893  | 78  | 84  | 4.81E-03 |
| cg20247102 | <i>RASA2</i>    | -4.140 | 48  | 114 | 4.81E-03 |
| cg04688368 | <i>KCNMA1</i>   | -3.735 | 64  | 98  | 4.81E-03 |

|            |                  |        |     |     |          |
|------------|------------------|--------|-----|-----|----------|
| cg19319069 | <i>UBE2H</i>     | -3.420 | 108 | 53  | 4.81E-03 |
| cg02880679 | <i>MBTD1</i>     | 1.680  | 27  | 135 | 4.81E-03 |
| cg07640473 | <i>SEMA3F</i>    | -3.828 | 116 | 46  | 4.81E-03 |
| cg16276199 | <i>PPP1CB</i>    | -4.963 | 56  | 106 | 4.81E-03 |
| cg25990230 | <i>PMS2L3</i>    | -4.950 | 52  | 110 | 4.81E-03 |
| cg13467649 | <i>CCDC25</i>    | -4.809 | 83  | 79  | 4.82E-03 |
| cg18152712 | <i>E2F3</i>      | -4.862 | 53  | 109 | 4.82E-03 |
| cg10716163 | <i>MUM1</i>      | -4.175 | 107 | 55  | 4.82E-03 |
| cg03574571 | <i>CD22</i>      | 2.090  | 40  | 122 | 4.82E-03 |
| cg03673470 | <i>ZP4</i>       | 2.394  | 38  | 124 | 4.82E-03 |
| cg19786920 | <i>FLJ14001</i>  | -2.990 | 80  | 82  | 4.82E-03 |
| cg01837689 | <i>P15RS</i>     | -4.625 | 97  | 65  | 4.82E-03 |
| cg01086978 | <i>ARFGEF1</i>   | -3.664 | 54  | 108 | 4.83E-03 |
| cg20090467 | <i>ANKRD20A1</i> | -0.069 | 61  | 101 | 4.83E-03 |
| cg19478478 | <i>TRDN</i>      | 0.984  | 109 | 53  | 4.83E-03 |
| cg08528984 | <i>PRDM16</i>    | -4.344 | 69  | 93  | 4.83E-03 |
| cg16729794 | <i>MOBP</i>      | 1.073  | 106 | 53  | 4.83E-03 |
| cg15769409 | <i>KIAA0649</i>  | -4.085 | 79  | 83  | 4.84E-03 |
| cg00886554 | <i>NMU</i>       | -4.649 | 56  | 106 | 4.85E-03 |
| cg01558777 | <i>C10orf99</i>  | 2.777  | 28  | 134 | 4.85E-03 |
| cg15441973 | <i>HNMT</i>      | 1.690  | 116 | 46  | 4.85E-03 |
| cg04718306 | <i>GADD45A</i>   | -4.601 | 88  | 74  | 4.86E-03 |
| cg00935430 | <i>ZNF678</i>    | -4.026 | 39  | 123 | 4.86E-03 |
| cg07465480 | <i>TPMT</i>      | -4.153 | 33  | 129 | 4.86E-03 |
| cg03522063 | <i>EMX2</i>      | -3.651 | 52  | 110 | 4.87E-03 |
| cg19448990 | <i>TOB2</i>      | -4.440 | 53  | 109 | 4.87E-03 |
| cg07288587 | <i>CSNK1G1</i>   | -4.994 | 60  | 102 | 4.87E-03 |
| cg17351385 | <i>ALKBH6</i>    | -4.203 | 123 | 39  | 4.87E-03 |
| cg21584430 | <i>ADORA2A</i>   | 1.059  | 69  | 93  | 4.87E-03 |
| cg21839522 | <i>CD68</i>      | -5.041 | 65  | 97  | 4.87E-03 |
| cg23455517 | <i>BCAT2</i>     | -3.711 | 43  | 119 | 4.87E-03 |
| cg24468890 | <i>HDAC1</i>     | -1.541 | 79  | 83  | 4.88E-03 |
| cg12177023 | <i>UBE3A</i>     | -5.741 | 94  | 68  | 4.88E-03 |
| cg14047656 | <i>MGC39518</i>  | -5.120 | 99  | 63  | 4.89E-03 |
| cg01673583 | <i>BIRC1</i>     | 4.741  | 108 | 54  | 4.89E-03 |
| cg20401181 | <i>SLC30A7</i>   | -4.670 | 17  | 145 | 4.90E-03 |
| cg02119229 | <i>BCDO2</i>     | -4.611 | 44  | 118 | 4.90E-03 |
| cg15641998 | <i>DHRS8</i>     | -4.196 | 45  | 117 | 4.90E-03 |
| cg20276750 | <i>PPM1M</i>     | -5.041 | 79  | 83  | 4.90E-03 |
| cg04619381 | <i>LOC222171</i> | -3.354 | 43  | 119 | 4.90E-03 |
| cg02296128 | <i>GTF2F2</i>    | -5.430 | 101 | 61  | 4.91E-03 |
| cg21844956 | <i>TRIM38</i>    | -4.745 | 95  | 67  | 4.91E-03 |
| cg00226923 | <i>FGD2</i>      | 1.315  | 101 | 61  | 4.91E-03 |
| cg18341054 | <i>NARS2</i>     | -3.991 | 101 | 61  | 4.91E-03 |
| cg19830147 | <i>LSS</i>       | -4.461 | 27  | 135 | 4.91E-03 |
| cg19684883 | <i>ZA20D2</i>    | -5.333 | 39  | 123 | 4.91E-03 |
| cg27167601 | <i>RORA</i>      | -3.681 | 75  | 87  | 4.91E-03 |
| cg09666654 | <i>MYO1B</i>     | -4.405 | 108 | 54  | 4.92E-03 |
| cg16433922 | <i>SFRP4</i>     | -3.266 | 44  | 118 | 4.92E-03 |
| cg04907257 | <i>ADCY2</i>     | -1.874 | 58  | 104 | 4.92E-03 |
| cg15103426 | <i>FLJ33814</i>  | -5.556 | 112 | 50  | 4.92E-03 |
| cg16154416 | <i>RASGRF1</i>   | -1.855 | 49  | 113 | 4.92E-03 |
| cg01635061 | <i>COL11A2</i>   | -3.933 | 123 | 39  | 4.92E-03 |
| cg12322132 | <i>IGF2AS</i>    | -4.233 | 74  | 88  | 4.92E-03 |
| cg24167841 | <i>ADMR</i>      | 3.062  | 106 | 56  | 4.92E-03 |

|            |                  |        |     |     |          |
|------------|------------------|--------|-----|-----|----------|
| cg09600829 | <i>C9orf100S</i> | -4.419 | 64  | 98  | 4.93E-03 |
| cg22110492 | <i>REXO4</i>     | 0.151  | 138 | 24  | 4.93E-03 |
| cg15903421 | <i>DFNB31</i>    | -4.171 | 97  | 65  | 4.93E-03 |
| cg17465219 | <i>LOC124491</i> | -3.590 | 93  | 69  | 4.94E-03 |
| cg05500015 | <i>NAALAD2</i>   | -4.088 | 138 | 24  | 4.95E-03 |
| cg23187653 | <i>PCSK1</i>     | -4.445 | 112 | 50  | 4.95E-03 |
| cg01620785 | <i>SLC5A6</i>    | -2.242 | 108 | 54  | 4.96E-03 |
| cg00798206 | <i>OXSRI</i>     | -3.676 | 103 | 59  | 4.96E-03 |
| cg01003992 | <i>LOC388152</i> | -4.688 | 96  | 66  | 4.96E-03 |
| cg06347996 | <i>DPYD</i>      | -4.496 | 96  | 66  | 4.96E-03 |
| cg06392589 | <i>FNDC6</i>     | 1.974  | 99  | 63  | 4.96E-03 |
| cg26134665 | <i>STX1B2</i>    | 0.374  | 102 | 60  | 4.96E-03 |
| cg23834593 | <i>HNF4A</i>     | 1.718  | 68  | 94  | 4.96E-03 |
| cg17872757 | <i>FLI1</i>      | -4.966 | 80  | 82  | 4.96E-03 |
| cg20664247 | <i>PEX10</i>     | 0.165  | 35  | 127 | 4.96E-03 |
| cg24709471 | <i>CRABP1</i>    | -2.362 | 59  | 103 | 4.96E-03 |
| cg13650137 | <i>ASPM</i>      | -5.462 | 111 | 51  | 4.96E-03 |
| cg21500966 | <i>NAALAD2</i>   | -4.330 | 89  | 73  | 4.97E-03 |
| cg03322749 | <i>MRRF</i>      | -4.661 | 94  | 68  | 4.97E-03 |
| cg11219178 | <i>OSBPL5</i>    | 0.935  | 72  | 90  | 4.97E-03 |
| cg02002676 | <i>APOBEC3B</i>  | -3.766 | 67  | 95  | 4.97E-03 |
| cg08596642 | <i>DHX9</i>      | -4.912 | 48  | 114 | 4.97E-03 |
| cg25492727 | <i>PTD004</i>    | -5.573 | 60  | 102 | 4.97E-03 |
| cg18422443 | <i>KITLG</i>     | -4.114 | 124 | 38  | 4.98E-03 |
| cg26180557 | <i>POU6F2</i>    | 2.754  | 101 | 61  | 4.98E-03 |
| cg09991975 | <i>JOSD1</i>     | -4.706 | 89  | 73  | 4.98E-03 |
| cg14217534 | <i>K-ALPHA-1</i> | -3.068 | 19  | 143 | 4.99E-03 |
| cg05602615 | <i>SETD3</i>     | -5.666 | 47  | 115 | 4.99E-03 |
| cg13496838 | <i>PAX3</i>      | -2.625 | 79  | 83  | 4.99E-03 |
| cg15195276 | <i>EDG2</i>      | -4.658 | 85  | 77  | 4.99E-03 |
| cg15705999 | <i>ZNF148</i>    | -4.672 | 78  | 84  | 4.99E-03 |
| cg11980188 | <i>CYP2R1</i>    | -4.644 | 76  | 86  | 4.99E-03 |
| cg13044136 | <i>AES</i>       | -3.463 | 85  | 77  | 5.00E-03 |
| cg16640096 | <i>COL4A3</i>    | -3.298 | 73  | 89  | 5.00E-03 |
| cg24958765 | <i>RAB4B</i>     | -5.544 | 129 | 33  | 5.00E-03 |
| cg10391629 | <i>AKAP11</i>    | -4.439 | 71  | 91  | 5.00E-03 |
| cg01311051 | <i>ALDOA</i>     | -1.965 | 39  | 119 | 5.00E-03 |
| cg19703628 | <i>PSMB4</i>     | -4.708 | 80  | 82  | 5.00E-03 |
| cg17506742 | <i>IL10RB</i>    | -4.635 | 85  | 77  | 5.01E-03 |
| cg05307923 | <i>ADARB2</i>    | -4.782 | 83  | 79  | 5.01E-03 |
| cg17063201 | <i>HCRTR2</i>    | 2.224  | 70  | 92  | 5.01E-03 |
| cg07150830 | <i>NOS2A</i>     | 3.775  | 141 | 21  | 5.01E-03 |
| cg26261431 | <i>PBK</i>       | -3.683 | 83  | 79  | 5.01E-03 |
| cg17941312 | <i>PSF1</i>      | 2.391  | 46  | 116 | 5.01E-03 |
| cg21546057 | <i>FIBP</i>      | -4.814 | 75  | 87  | 5.01E-03 |
| cg25104511 | <i>RAPGEFL1</i>  | -0.713 | 60  | 102 | 5.01E-03 |
| cg17400229 | <i>U2AF1</i>     | -4.720 | 81  | 81  | 5.02E-03 |
| cg22691736 | <i>MTRF1</i>     | -4.150 | 88  | 74  | 5.02E-03 |
| cg23540745 | <i>HIST1H4G</i>  | 2.293  | 75  | 87  | 5.02E-03 |
| cg10177528 | <i>TRAF5</i>     | 1.761  | 40  | 122 | 5.02E-03 |
| cg02725014 | <i>HOMER1</i>    | -4.026 | 61  | 101 | 5.03E-03 |
| cg06933965 | <i>CMKLR1</i>    | -1.926 | 16  | 146 | 5.03E-03 |
| cg11185452 | <i>ERH</i>       | -4.260 | 108 | 54  | 5.03E-03 |
| cg17839278 | <i>MTCH2</i>     | -3.859 | 70  | 92  | 5.03E-03 |
| cg21818252 | <i>SEC24B</i>    | -3.119 | 37  | 125 | 5.04E-03 |

|            |                 |        |     |     |          |
|------------|-----------------|--------|-----|-----|----------|
| cg02157083 | <i>APOA5</i>    | 1.789  | 69  | 93  | 5.04E-03 |
| cg19325985 | <i>HOXD13</i>   | -2.257 | 75  | 87  | 5.05E-03 |
| cg01797527 | <i>BMP2</i>     | -4.621 | 101 | 61  | 5.05E-03 |
| cg01656470 | <i>ZIM2</i>     | 1.197  | 100 | 62  | 5.05E-03 |
| cg01909921 | <i>GF1B</i>     | -3.756 | 82  | 80  | 5.05E-03 |
| cg09606564 | <i>MFAP4</i>    | -1.583 | 23  | 139 | 5.05E-03 |
| cg00164041 | <i>HERC5</i>    | -4.674 | 99  | 63  | 5.06E-03 |
| cg00214794 | <i>KRT17</i>    | 0.716  | 60  | 102 | 5.06E-03 |
| cg21194776 | <i>USP54</i>    | 1.050  | 78  | 84  | 5.06E-03 |
| cg14081015 | <i>RIOK2</i>    | -4.201 | 50  | 112 | 5.06E-03 |
| cg09816912 | <i>MARCKS</i>   | -4.952 | 68  | 94  | 5.06E-03 |
| cg03752885 | <i>DAPK3</i>    | -0.900 | 126 | 36  | 5.06E-03 |
| cg25423576 | <i>RFXDC1</i>   | -4.225 | 117 | 45  | 5.06E-03 |
| cg25506396 | <i>DGKD</i>     | -4.165 | 60  | 102 | 5.07E-03 |
| cg18792584 | <i>TOR1AIP1</i> | -5.339 | 131 | 31  | 5.07E-03 |
| cg11554937 | <i>HSD17B3</i>  | 3.598  | 55  | 107 | 5.07E-03 |
| cg16628918 | <i>GPR172A</i>  | 0.664  | 78  | 84  | 5.07E-03 |
| cg13454184 | <i>TARSL1</i>   | -4.409 | 69  | 93  | 5.07E-03 |
| cg20919799 | <i>CDKN1C</i>   | -4.143 | 101 | 61  | 5.08E-03 |
| cg04863713 | <i>TSRC1</i>    | -3.083 | 69  | 93  | 5.09E-03 |
| cg21874193 | <i>TAS2R48</i>  | 1.815  | 60  | 102 | 5.09E-03 |
| cg20778669 | <i>MGMT</i>     | 3.185  | 38  | 124 | 5.09E-03 |
| cg17460095 | <i>PLEKHC1</i>  | -4.831 | 86  | 76  | 5.10E-03 |
| cg09657538 | <i>PIGY</i>     | -3.204 | 38  | 124 | 5.10E-03 |
| cg08116137 | <i>NAT8</i>     | -1.858 | 51  | 111 | 5.10E-03 |
| cg13735974 | <i>NFYC</i>     | -2.253 | 47  | 115 | 5.10E-03 |
| cg17896249 | <i>E2F4</i>     | -5.156 | 67  | 95  | 5.10E-03 |
| cg18108237 | <i>BRAP</i>     | -5.659 | 87  | 75  | 5.10E-03 |
| cg26747293 | <i>FLJ39155</i> | -4.866 | 125 | 37  | 5.10E-03 |
| cg06403553 | <i>PGK2</i>     | 2.533  | 81  | 81  | 5.10E-03 |
| cg23495733 | <i>CPNE8</i>    | -5.087 | 53  | 109 | 5.10E-03 |
| cg23006204 | <i>DPM2</i>     | -0.523 | 103 | 59  | 5.10E-03 |
| cg15541230 | <i>COG1</i>     | -5.422 | 92  | 70  | 5.11E-03 |
| cg00572797 | <i>RUNX3</i>    | 5.264  | 34  | 128 | 5.11E-03 |
| cg12879297 | <i>C16orf46</i> | -5.030 | 48  | 114 | 5.11E-03 |
| cg07922606 | <i>HIST1H3E</i> | 1.280  | 66  | 96  | 5.11E-03 |
| cg13258606 | <i>FDX1</i>     | -5.675 | 57  | 105 | 5.11E-03 |
| cg20795401 | <i>ITGA6</i>    | -1.201 | 35  | 127 | 5.11E-03 |
| cg02552945 | <i>C5</i>       | 1.141  | 28  | 133 | 5.12E-03 |
| cg22120948 | <i>GIT1</i>     | -4.965 | 34  | 128 | 5.12E-03 |
| cg23126915 | <i>XRCC2</i>    | 1.503  | 35  | 127 | 5.12E-03 |
| cg25033972 | <i>RIPK4</i>    | -3.407 | 61  | 101 | 5.12E-03 |
| cg14775560 | <i>FOLH1</i>    | -2.901 | 55  | 107 | 5.12E-03 |
| cg05322019 | <i>SEMA4G</i>   | 2.364  | 56  | 106 | 5.12E-03 |
| cg14162076 | <i>CLEC4D</i>   | 2.748  | 54  | 108 | 5.12E-03 |
| cg27638713 | <i>MCM3</i>     | -3.824 | 68  | 94  | 5.13E-03 |
| cg13138279 | <i>CRYBA1</i>   | 3.265  | 27  | 135 | 5.13E-03 |
| cg18986165 | <i>SIGLEC12</i> | 3.540  | 46  | 116 | 5.13E-03 |
| cg07393322 | <i>A4GALT</i>   | -2.581 | 25  | 137 | 5.13E-03 |
| cg04828792 | <i>MX2</i>      | 2.589  | 92  | 70  | 5.14E-03 |
| cg06062132 | <i>SENP6</i>    | -3.663 | 67  | 95  | 5.14E-03 |
| cg06872331 | <i>STEAP3</i>   | -3.469 | 87  | 75  | 5.14E-03 |
| cg13342120 | <i>TRAFD1</i>   | -4.261 | 79  | 83  | 5.14E-03 |
| cg24340657 | <i>KRT24</i>    | 1.688  | 89  | 73  | 5.14E-03 |
| cg25535027 | <i>RXRB</i>     | -3.573 | 107 | 55  | 5.14E-03 |

|            |                     |        |     |     |          |
|------------|---------------------|--------|-----|-----|----------|
| cg10029411 | <i>FAM10A4</i>      | 0.364  | 46  | 116 | 5.15E-03 |
| cg05955301 | <i>PRELP</i>        | -0.271 | 123 | 39  | 5.15E-03 |
| cg02973263 | <i>PRKCI</i>        | -4.775 | 86  | 76  | 5.15E-03 |
| cg27034836 | <i>GLB1</i>         | -2.467 | 119 | 43  | 5.15E-03 |
| cg10806140 | <i>SFRP4</i>        | -4.523 | 77  | 85  | 5.15E-03 |
| cg27119451 | <i>BRD8</i>         | -4.113 | 100 | 62  | 5.16E-03 |
| cg17127769 | <i>LCP2</i>         | -0.797 | 95  | 67  | 5.16E-03 |
| cg19220586 | <i>CREG1</i>        | -3.479 | 40  | 122 | 5.16E-03 |
| cg13722123 | <i>GRM1</i>         | -2.970 | 107 | 55  | 5.16E-03 |
| cg27035806 | <i>HSPC111</i>      | 3.131  | 50  | 112 | 5.16E-03 |
| cg06666486 | <i>EIF2AK1</i>      | -3.110 | 87  | 75  | 5.16E-03 |
| cg06954481 | <i>GBX2</i>         | -3.121 | 87  | 75  | 5.16E-03 |
| cg09054876 | <i>PECI</i>         | -3.252 | 39  | 123 | 5.16E-03 |
| cg07209631 | <i>PPM1K</i>        | -4.276 | 115 | 47  | 5.17E-03 |
| cg22492020 | <i>FLJ20516</i>     | -3.370 | 56  | 106 | 5.17E-03 |
| cg02162412 | <i>HMGCR</i>        | -5.514 | 77  | 85  | 5.17E-03 |
| cg25960567 | <i>ITPR2</i>        | -4.559 | 72  | 90  | 5.17E-03 |
| cg05743054 | <i>MLF1</i>         | -5.473 | 93  | 69  | 5.18E-03 |
| cg04946535 | <i>CFL1</i>         | -5.175 | 58  | 104 | 5.18E-03 |
| cg15143643 | <i>FBLN1</i>        | 3.425  | 50  | 112 | 5.19E-03 |
| cg21989094 | <i>MRPS12</i>       | -5.736 | 116 | 46  | 5.19E-03 |
| cg02283643 | <i>SULF1</i>        | -2.367 | 59  | 103 | 5.19E-03 |
| cg06869899 | <i>RBKS</i>         | -4.728 | 66  | 96  | 5.20E-03 |
| cg20477318 | <i>TIMM23</i>       | -4.671 | 52  | 110 | 5.20E-03 |
| cg11474811 | <i>TRPM5</i>        | 1.651  | 119 | 43  | 5.20E-03 |
| cg12601757 | <i>ST6GALNAC3</i>   | -3.990 | 70  | 92  | 5.20E-03 |
| cg00626119 | <i>NTRK1</i>        | 0.468  | 63  | 99  | 5.21E-03 |
| cg13998293 | <i>TRIM63</i>       | 0.540  | 29  | 133 | 5.21E-03 |
| cg00094319 | <i>PABPC3</i>       | 1.821  | 47  | 115 | 5.21E-03 |
| cg11140785 | <i>ZNF264</i>       | -5.158 | 66  | 96  | 5.21E-03 |
| cg02515422 | <i>TLR4</i>         | -3.711 | 58  | 104 | 5.21E-03 |
| cg17293641 | <i>TNFRSF11B</i>    | -5.405 | 102 | 60  | 5.22E-03 |
| cg15437432 | <i>TMED9</i>        | -4.330 | 90  | 72  | 5.22E-03 |
| cg18199266 | <i>CLEC4F</i>       | 1.609  | 96  | 66  | 5.22E-03 |
| cg21363943 | <i>SF3B4</i>        | -5.118 | 28  | 134 | 5.22E-03 |
| cg24545967 | <i>SH2D3C</i>       | -0.374 | 85  | 77  | 5.22E-03 |
| cg06200339 | <i>SOX30</i>        | 2.223  | 100 | 62  | 5.22E-03 |
| cg08491125 | <i>ISG20</i>        | -3.970 | 58  | 104 | 5.22E-03 |
| cg11793380 | <i>C1QTNF6</i>      | 1.249  | 63  | 99  | 5.22E-03 |
| cg14897096 | <i>PC</i>           | 2.474  | 73  | 89  | 5.22E-03 |
| cg14271499 | <i>THOP1</i>        | -5.099 | 68  | 94  | 5.23E-03 |
| cg10383428 | <i>CNAP1</i>        | -0.008 | 134 | 28  | 5.23E-03 |
| cg02519806 | <i>SYNPO2</i>       | -4.805 | 120 | 42  | 5.23E-03 |
| cg19850348 | <i>PYGO1</i>        | -4.556 | 101 | 61  | 5.23E-03 |
| cg26453990 | <i>FIBP</i>         | -4.715 | 45  | 117 | 5.23E-03 |
| cg16908782 | <i>WDHD1</i>        | -4.665 | 43  | 119 | 5.24E-03 |
| cg00208830 | <i>LAMC2</i>        | 1.379  | 56  | 106 | 5.24E-03 |
| cg07149772 | <i>KCTD9</i>        | -3.924 | 66  | 96  | 5.24E-03 |
| cg06768707 | <i>PCDHB8</i>       | 0.365  | 82  | 80  | 5.24E-03 |
| cg23609821 | <i>NP</i>           | -4.552 | 54  | 108 | 5.24E-03 |
| cg24890043 | <i>DKFZP566N034</i> | -5.102 | 64  | 98  | 5.24E-03 |
| cg26750747 | <i>FOLR1</i>        | 2.036  | 36  | 126 | 5.25E-03 |
| cg04280397 | <i>PLA2G6</i>       | -4.319 | 42  | 120 | 5.25E-03 |
| cg04633513 | <i>AVPR1B</i>       | -4.762 | 57  | 105 | 5.25E-03 |
| cg13299148 | <i>COL16A1</i>      | -3.911 | 106 | 56  | 5.25E-03 |

|            |                  |        |     |     |          |
|------------|------------------|--------|-----|-----|----------|
| cg22228296 | <i>RNF7</i>      | -5.397 | 72  | 90  | 5.26E-03 |
| cg07236381 | <i>AFF4</i>      | -4.727 | 77  | 85  | 5.26E-03 |
| cg04879696 | <i>SPG7</i>      | -4.801 | 78  | 84  | 5.26E-03 |
| cg15526708 | <i>TGFBP1</i>    | -3.388 | 108 | 54  | 5.26E-03 |
| cg08719486 | <i>DAPK1</i>     | -0.704 | 79  | 83  | 5.26E-03 |
| cg19850163 | <i>HRB</i>       | -3.502 | 98  | 64  | 5.27E-03 |
| cg11834681 | <i>CYP2A13</i>   | 1.994  | 121 | 41  | 5.27E-03 |
| cg25340056 | <i>DPH1</i>      | -6.284 | 63  | 99  | 5.27E-03 |
| cg07246225 | <i>ZFH1B</i>     | -4.178 | 123 | 39  | 5.27E-03 |
| cg03751414 | <i>AP1S1</i>     | -3.558 | 81  | 81  | 5.28E-03 |
| cg17533684 | <i>PIK3R3</i>    | -5.221 | 70  | 92  | 5.29E-03 |
| cg13979182 | <i>ADD1</i>      | -3.090 | 124 | 38  | 5.29E-03 |
| cg04349727 | <i>KLK5</i>      | 0.710  | 81  | 81  | 5.29E-03 |
| cg01626197 | <i>GMPPB</i>     | -5.213 | 63  | 99  | 5.30E-03 |
| cg04386405 | <i>ZNF83</i>     | -4.664 | 86  | 76  | 5.30E-03 |
| cg22065500 | <i>TNPO3</i>     | -5.559 | 49  | 113 | 5.30E-03 |
| cg16793061 | <i>EYA1</i>      | -5.038 | 77  | 85  | 5.30E-03 |
| cg10869069 | <i>ASCC3</i>     | -3.360 | 44  | 118 | 5.30E-03 |
| cg11216616 | <i>RAB35</i>     | -3.288 | 107 | 54  | 5.30E-03 |
| cg01515887 | <i>SAA2</i>      | 2.067  | 16  | 146 | 5.30E-03 |
| cg10613440 | <i>SUCLA2</i>    | -5.902 | 77  | 85  | 5.30E-03 |
| cg16797831 | <i>KIAA1324</i>  | -2.429 | 45  | 117 | 5.31E-03 |
| cg24293567 | <i>C9orf9</i>    | -3.615 | 99  | 63  | 5.31E-03 |
| cg10691259 | <i>TRSPAP1</i>   | -3.390 | 71  | 90  | 5.31E-03 |
| cg10644878 | <i>LYPLA1</i>    | -0.483 | 75  | 87  | 5.31E-03 |
| cg02175035 | <i>RAB40B</i>    | -5.482 | 82  | 80  | 5.31E-03 |
| cg08656294 | <i>CD68</i>      | -5.657 | 89  | 73  | 5.31E-03 |
| cg13235447 | <i>IFNA2</i>     | -0.906 | 134 | 27  | 5.32E-03 |
| cg19123863 | <i>JUNB</i>      | -3.585 | 41  | 121 | 5.32E-03 |
| cg20302307 | <i>NUMB</i>      | -4.445 | 39  | 123 | 5.32E-03 |
| cg15387123 | <i>CLIC3</i>     | -0.273 | 18  | 144 | 5.32E-03 |
| cg27090087 | <i>TINAG</i>     | -0.151 | 68  | 94  | 5.32E-03 |
| cg10224037 | <i>ZNF354A</i>   | -5.570 | 58  | 104 | 5.32E-03 |
| cg24220122 | <i>ZNF322A</i>   | -3.990 | 74  | 88  | 5.32E-03 |
| cg10876928 | <i>SDC4</i>      | -0.432 | 46  | 116 | 5.32E-03 |
| cg20406374 | <i>SQSTM1</i>    | -3.778 | 74  | 88  | 5.33E-03 |
| cg24341536 | <i>SQSTM1</i>    | -4.171 | 109 | 53  | 5.33E-03 |
| cg18059223 | <i>NALP2</i>     | 1.446  | 79  | 83  | 5.33E-03 |
| cg06590533 | <i>C20orf108</i> | -5.186 | 65  | 97  | 5.33E-03 |
| cg14449051 | <i>SLC6A15</i>   | -5.101 | 82  | 80  | 5.33E-03 |
| cg23183296 | <i>UGT2B28</i>   | 1.271  | 51  | 110 | 5.33E-03 |
| cg09675889 | <i>C19orf22</i>  | -3.969 | 33  | 129 | 5.33E-03 |
| cg14613972 | <i>ATG10</i>     | -2.388 | 43  | 119 | 5.33E-03 |
| cg08771429 | <i>KRIT1</i>     | -4.166 | 100 | 62  | 5.34E-03 |
| cg16970232 | <i>APC</i>       | -2.749 | 26  | 136 | 5.34E-03 |
| cg12563480 | <i>SNX11</i>     | -4.607 | 96  | 66  | 5.34E-03 |
| cg24001070 | <i>SMCR8</i>     | -2.786 | 59  | 103 | 5.34E-03 |
| cg22886005 | <i>ILKAP</i>     | -4.271 | 67  | 95  | 5.34E-03 |
| cg23128146 | <i>DCTN4</i>     | -4.242 | 57  | 105 | 5.34E-03 |
| cg03271907 | <i>MGMT</i>      | 3.966  | 46  | 116 | 5.35E-03 |
| cg15971505 | <i>C6orf203</i>  | -4.419 | 112 | 50  | 5.35E-03 |
| cg25762706 | <i>STMN4</i>     | 1.315  | 69  | 93  | 5.35E-03 |
| cg11159299 | <i>GZMM</i>      | 1.395  | 33  | 129 | 5.35E-03 |
| cg24167928 | <i>UTP14C</i>    | 2.244  | 118 | 43  | 5.36E-03 |
| cg19601035 | <i>COL2A1</i>    | -1.866 | 66  | 96  | 5.36E-03 |

|            |                 |        |     |     |          |
|------------|-----------------|--------|-----|-----|----------|
| cg24573501 | <i>F2RL1</i>    | -2.132 | 91  | 71  | 5.37E-03 |
| cg15784332 | <i>COMP</i>     | -3.392 | 91  | 71  | 5.37E-03 |
| cg03580876 | <i>TRMU</i>     | -6.118 | 99  | 63  | 5.37E-03 |
| cg10943191 | <i>TMEM52</i>   | -4.430 | 94  | 68  | 5.37E-03 |
| cg27491887 | <i>KCNQ1</i>    | -0.682 | 72  | 90  | 5.37E-03 |
| cg06461848 | <i>WDR64</i>    | -0.660 | 88  | 55  | 5.37E-03 |
| cg16935609 | <i>SRD5A1</i>   | 0.843  | 111 | 51  | 5.38E-03 |
| cg13320626 | <i>ST8SIA4</i>  | -4.106 | 32  | 130 | 5.38E-03 |
| cg03830408 | <i>DCPS</i>     | -3.676 | 71  | 91  | 5.39E-03 |
| cg25021182 | <i>ELA2B</i>    | 1.706  | 81  | 81  | 5.39E-03 |
| cg07576541 | <i>SNAPAP</i>   | 2.271  | 34  | 128 | 5.39E-03 |
| cg06595693 | <i>DISP2</i>    | -1.766 | 97  | 65  | 5.40E-03 |
| cg15737168 | <i>TECTA</i>    | 2.539  | 109 | 53  | 5.40E-03 |
| cg15756091 | <i>RGSL2</i>    | 2.011  | 103 | 59  | 5.40E-03 |
| cg16069910 | <i>TXNL6</i>    | 1.210  | 56  | 106 | 5.40E-03 |
| cg05236474 | <i>C17orf59</i> | -4.992 | 39  | 123 | 5.40E-03 |
| cg13951472 | <i>CDC42EP1</i> | -2.559 | 94  | 68  | 5.40E-03 |
| cg25420583 | <i>WBP1</i>     | -4.210 | 106 | 56  | 5.40E-03 |
| cg15375239 | <i>SPINT2</i>   | -5.921 | 68  | 94  | 5.40E-03 |
| cg09142399 | <i>CRYZ</i>     | 1.252  | 117 | 45  | 5.40E-03 |
| cg10545682 | <i>TUFT1</i>    | -4.725 | 48  | 114 | 5.40E-03 |
| cg02399449 | <i>CLDN12</i>   | -3.774 | 117 | 45  | 5.42E-03 |
| cg05369166 | <i>NFASC</i>    | -3.798 | 102 | 60  | 5.42E-03 |
| cg21572316 | <i>ABCA1</i>    | -4.604 | 81  | 81  | 5.42E-03 |
| cg15587603 | <i>RPS27A</i>   | -4.551 | 67  | 95  | 5.42E-03 |
| cg18528640 | <i>MSTO1</i>    | -4.366 | 63  | 99  | 5.42E-03 |
| cg08843492 | <i>IFITM2</i>   | -2.512 | 62  | 100 | 5.42E-03 |
| cg18963390 | <i>ZNF9</i>     | -4.583 | 72  | 90  | 5.43E-03 |
| cg26459500 | <i>NUDT16</i>   | -3.368 | 36  | 126 | 5.43E-03 |
| cg12106731 | <i>NCDN</i>     | -4.833 | 68  | 94  | 5.44E-03 |
| cg19837824 | <i>NTHL1</i>    | -4.114 | 30  | 132 | 5.44E-03 |
| cg02212737 | <i>EXOC7</i>    | -4.806 | 48  | 114 | 5.45E-03 |
| cg25465406 | <i>GUCY2D</i>   | -3.893 | 83  | 79  | 5.45E-03 |
| cg00298357 | <i>IL17B</i>    | 2.940  | 67  | 95  | 5.46E-03 |
| cg17404605 | <i>MAP2K7</i>   | -5.386 | 52  | 110 | 5.46E-03 |
| cg15307169 | <i>FLJ33718</i> | -4.586 | 70  | 92  | 5.46E-03 |
| cg12447832 | <i>TTC15</i>    | -0.132 | 36  | 126 | 5.47E-03 |
| cg25612145 | <i>STK31</i>    | 3.849  | 67  | 95  | 5.47E-03 |
| cg13282837 | <i>TCL1A</i>    | -0.626 | 88  | 74  | 5.48E-03 |
| cg10560038 | <i>CMTM5</i>    | 3.726  | 46  | 116 | 5.48E-03 |
| cg20630151 | <i>BPESC1</i>   | 2.137  | 73  | 89  | 5.48E-03 |
| cg26677448 | <i>PAX2</i>     | -3.120 | 97  | 65  | 5.48E-03 |
| cg15147545 | <i>ITGB1</i>    | -5.810 | 64  | 98  | 5.48E-03 |
| cg05886626 | <i>THBS1</i>    | -2.782 | 143 | 19  | 5.48E-03 |
| cg18644543 | <i>HMHA1</i>    | -5.455 | 78  | 84  | 5.48E-03 |
| cg07248043 | <i>OSBPL11</i>  | -5.107 | 58  | 104 | 5.49E-03 |
| cg27459381 | <i>CHST12</i>   | 2.567  | 91  | 71  | 5.49E-03 |
| cg06765514 | <i>PIP5KL1</i>  | -3.955 | 93  | 69  | 5.49E-03 |
| cg04553559 | <i>ZNF703</i>   | -4.147 | 71  | 91  | 5.49E-03 |
| cg23599843 | <i>JPH1</i>     | -2.550 | 45  | 117 | 5.50E-03 |
| cg21690806 | <i>SLC9A8</i>   | -4.045 | 57  | 105 | 5.50E-03 |
| cg22282941 | <i>HLA-DQA2</i> | -0.712 | 103 | 59  | 5.50E-03 |
| cg19187185 | <i>RRAGD</i>    | -4.001 | 82  | 80  | 5.51E-03 |
| cg10167296 | <i>RASSF5</i>   | -4.252 | 43  | 119 | 5.51E-03 |
| cg17067005 | <i>IL10</i>     | 2.624  | 132 | 30  | 5.52E-03 |

|            |                  |        |     |     |          |
|------------|------------------|--------|-----|-----|----------|
| cg26675934 | <i>NDUFB10</i>   | -5.646 | 52  | 110 | 5.53E-03 |
| cg22926560 | <i>PFKFB2</i>    | -4.500 | 75  | 87  | 5.54E-03 |
| cg11065385 | <i>B4GALNT3</i>  | -3.561 | 70  | 92  | 5.54E-03 |
| cg10673431 | <i>S100A11</i>   | 4.201  | 37  | 125 | 5.55E-03 |
| cg19439331 | <i>CXXC6</i>     | -4.892 | 80  | 82  | 5.55E-03 |
| cg12247247 | <i>RPL23</i>     | -3.529 | 60  | 102 | 5.56E-03 |
| cg16085042 | <i>HSP90B1</i>   | -3.960 | 56  | 106 | 5.56E-03 |
| cg20420433 | <i>HLXB9</i>     | -4.458 | 69  | 93  | 5.56E-03 |
| cg00807586 | <i>DLEC1</i>     | -3.749 | 12  | 150 | 5.56E-03 |
| cg04598744 | <i>LMBRD1</i>    | -6.010 | 44  | 118 | 5.57E-03 |
| cg06106793 | <i>PRCC</i>      | -4.652 | 46  | 116 | 5.57E-03 |
| cg00243313 | <i>IRX4</i>      | -5.196 | 112 | 50  | 5.58E-03 |
| cg23408620 | <i>F11</i>       | 0.575  | 114 | 48  | 5.58E-03 |
| cg11262874 | <i>ZNF681</i>    | -1.243 | 103 | 59  | 5.58E-03 |
| cg11909865 | <i>LOC120379</i> | -4.485 | 37  | 125 | 5.58E-03 |
| cg02795624 | <i>MIZF</i>      | -4.591 | 74  | 88  | 5.59E-03 |
| cg12830829 | <i>TXNDC</i>     | -4.932 | 37  | 125 | 5.59E-03 |
| cg00426056 | <i>CUTA</i>      | -4.896 | 35  | 127 | 5.59E-03 |
| cg10484958 | <i>PCDH8</i>     | -3.325 | 88  | 74  | 5.59E-03 |
| cg20442697 | <i>LRRC17</i>    | -0.960 | 115 | 47  | 5.61E-03 |
| cg07301004 | <i>ARPC3</i>     | -4.291 | 110 | 52  | 5.61E-03 |
| cg05038121 | <i>FAH</i>       | -2.293 | 135 | 27  | 5.62E-03 |
| cg27210766 | <i>BUB1</i>      | -5.014 | 87  | 75  | 5.62E-03 |
| cg05871136 | <i>UNC5B</i>     | -3.936 | 63  | 99  | 5.62E-03 |
| cg04005032 | <i>OSBPL10</i>   | -4.735 | 57  | 105 | 5.62E-03 |
| cg08893585 | <i>BARX2</i>     | -4.114 | 82  | 80  | 5.63E-03 |
| cg11387131 | <i>KCNJ5</i>     | -3.970 | 86  | 76  | 5.63E-03 |
| cg12880658 | <i>CDO1</i>      | -4.876 | 96  | 66  | 5.64E-03 |
| cg01439983 | <i>PEX13</i>     | -4.568 | 55  | 107 | 5.64E-03 |
| cg09636671 | <i>LMOD1</i>     | -3.111 | 66  | 96  | 5.64E-03 |
| cg19570545 | <i>PKP1</i>      | -5.132 | 62  | 100 | 5.65E-03 |
| cg05695927 | <i>SPATA5L1</i>  | -3.766 | 62  | 100 | 5.65E-03 |
| cg21019522 | <i>SLC22A18</i>  | -0.808 | 64  | 98  | 5.65E-03 |
| cg24237576 | <i>DNASE1L2</i>  | 2.183  | 33  | 129 | 5.65E-03 |
| cg21142398 | <i>GLIS1</i>     | 1.320  | 117 | 45  | 5.65E-03 |
| cg03242666 | <i>PMP22</i>     | 0.109  | 118 | 44  | 5.65E-03 |
| cg26870566 | <i>KIRREL</i>    | 1.596  | 43  | 119 | 5.65E-03 |
| cg19324627 | <i>APOA1</i>     | 1.471  | 75  | 87  | 5.66E-03 |
| cg02277509 | <i>TIMM9</i>     | -5.140 | 95  | 67  | 5.66E-03 |
| cg06434428 | <i>HAPLN1</i>    | 1.969  | 91  | 71  | 5.66E-03 |
| cg20757912 | <i>SSBP2</i>     | -3.573 | 31  | 131 | 5.66E-03 |
| cg03229887 | <i>EIF2B3</i>    | -4.747 | 57  | 105 | 5.66E-03 |
| cg01267315 | <i>C1orf164</i>  | -4.244 | 98  | 64  | 5.67E-03 |
| cg15377649 | <i>ACTN4</i>     | -4.940 | 94  | 68  | 5.67E-03 |
| cg05057057 | <i>DDX56</i>     | -4.399 | 76  | 86  | 5.68E-03 |
| cg21099221 | <i>SRM</i>       | -5.040 | 33  | 129 | 5.68E-03 |
| cg06432655 | <i>CLIPR-59</i>  | -1.147 | 74  | 88  | 5.68E-03 |
| cg24809640 | <i>MED4</i>      | -4.261 | 91  | 71  | 5.68E-03 |
| cg05885720 | <i>EMP1</i>      | 1.481  | 114 | 48  | 5.68E-03 |
| cg15692239 | <i>ALDOC</i>     | -4.895 | 39  | 123 | 5.68E-03 |
| cg19616230 | <i>SLC34A2</i>   | -2.120 | 12  | 150 | 5.68E-03 |
| cg05331214 | <i>SCN7A</i>     | 0.224  | 86  | 76  | 5.68E-03 |
| cg21449843 | <i>MANBAL</i>    | -4.621 | 65  | 97  | 5.69E-03 |
| cg07109670 | <i>WDR67</i>     | -4.981 | 96  | 66  | 5.70E-03 |
| cg14939691 | <i>TKT</i>       | -4.664 | 66  | 96  | 5.70E-03 |

|            |                  |        |     |     |          |
|------------|------------------|--------|-----|-----|----------|
| cg24909445 | <i>SLC3A2</i>    | -5.364 | 86  | 76  | 5.70E-03 |
| cg01374047 | <i>HCFC1R1</i>   | -5.403 | 77  | 85  | 5.71E-03 |
| cg19470701 | <i>C20orf149</i> | -5.004 | 66  | 96  | 5.71E-03 |
| cg10764357 | <i>BCAT1</i>     | -5.014 | 130 | 32  | 5.71E-03 |
| cg06871974 | <i>TNS3</i>      | 3.194  | 44  | 118 | 5.71E-03 |
| cg12158019 | <i>OXCT2</i>     | -0.142 | 93  | 69  | 5.72E-03 |
| cg18357645 | <i>OS9</i>       | -1.986 | 24  | 138 | 5.72E-03 |
| cg21722058 | <i>PLK4</i>      | -5.542 | 80  | 82  | 5.72E-03 |
| cg09234474 | <i>DUSP14</i>    | -3.533 | 47  | 115 | 5.73E-03 |
| cg26239233 | <i>CIITA</i>     | -1.203 | 71  | 91  | 5.73E-03 |
| cg04936062 | <i>THRAP3</i>    | -4.431 | 25  | 137 | 5.73E-03 |
| cg15422784 | <i>LRRC8B</i>    | 2.969  | 56  | 106 | 5.74E-03 |
| cg19465374 | <i>AZGP1</i>     | 2.256  | 69  | 93  | 5.74E-03 |
| cg23564033 | <i>THOC3</i>     | -5.118 | 44  | 118 | 5.74E-03 |
| cg01168201 | <i>HIC1</i>      | -5.050 | 76  | 86  | 5.74E-03 |
| cg02237119 | <i>WBSCR27</i>   | -0.320 | 54  | 108 | 5.74E-03 |
| cg03561565 | <i>KCNS2</i>     | -2.576 | 45  | 117 | 5.74E-03 |
| cg19591588 | <i>SACM1L</i>    | -4.615 | 120 | 42  | 5.74E-03 |
| cg23143093 | <i>NEK10</i>     | 2.606  | 34  | 128 | 5.74E-03 |
| cg24599739 | <i>DDT</i>       | -5.383 | 77  | 85  | 5.74E-03 |
| cg04240200 | <i>ATRN</i>      | -4.312 | 69  | 93  | 5.74E-03 |
| cg01957330 | <i>SCAP2</i>     | -5.266 | 33  | 129 | 5.74E-03 |
| cg09547190 | <i>C9orf89</i>   | -0.046 | 94  | 68  | 5.75E-03 |
| cg07411229 | <i>LOC128153</i> | -4.909 | 74  | 88  | 5.75E-03 |
| cg12592779 | <i>ZNF12</i>     | -3.598 | 92  | 70  | 5.75E-03 |
| cg17177699 | <i>COL5A3</i>    | -0.765 | 23  | 139 | 5.75E-03 |
| cg09549827 | <i>ESPN</i>      | -3.632 | 96  | 66  | 5.75E-03 |
| cg21164303 | <i>TMED3</i>     | -5.072 | 87  | 75  | 5.76E-03 |
| cg17029168 | <i>NKX2-2</i>    | -2.904 | 74  | 88  | 5.76E-03 |
| cg21944455 | <i>GFAP</i>      | 2.461  | 97  | 65  | 5.76E-03 |
| cg07039113 | <i>S100A9</i>    | 2.239  | 59  | 103 | 5.76E-03 |
| cg13800022 | <i>ITGB1</i>     | -4.800 | 144 | 18  | 5.76E-03 |
| cg03399459 | <i>ANXA8</i>     | 1.066  | 84  | 78  | 5.76E-03 |
| cg20145360 | <i>ROBO1</i>     | 0.869  | 25  | 137 | 5.77E-03 |
| cg09816180 | <i>GC</i>        | 2.079  | 132 | 30  | 5.77E-03 |
| cg18263686 | <i>LOC128153</i> | -3.531 | 98  | 64  | 5.77E-03 |
| cg11677722 | <i>PAF1</i>      | -5.059 | 82  | 80  | 5.78E-03 |
| cg13721560 | <i>LRPPRC</i>    | -3.499 | 134 | 28  | 5.78E-03 |
| cg02357725 | <i>IMP3</i>      | -4.527 | 89  | 73  | 5.78E-03 |
| cg04947838 | <i>ARFGEF1</i>   | -4.282 | 99  | 63  | 5.78E-03 |
| cg05226008 | <i>DLC1</i>      | -1.304 | 76  | 86  | 5.79E-03 |
| cg20982583 | <i>POLR2F</i>    | -5.799 | 62  | 100 | 5.79E-03 |
| cg21331335 | <i>KCNV2</i>     | 3.272  | 98  | 64  | 5.79E-03 |
| cg04543012 | <i>TFCP2</i>     | -4.406 | 46  | 116 | 5.79E-03 |
| cg14118546 | <i>KIAA1012</i>  | -4.960 | 70  | 92  | 5.79E-03 |
| cg25172835 | <i>PUNC</i>      | 2.473  | 130 | 32  | 5.79E-03 |
| cg10104451 | <i>ARC</i>       | -3.333 | 73  | 89  | 5.79E-03 |
| cg07184439 | <i>MGAT2</i>     | -5.075 | 100 | 62  | 5.79E-03 |
| cg07351267 | <i>LRP3</i>      | 0.252  | 74  | 88  | 5.79E-03 |
| cg00469635 | <i>PPME1</i>     | -5.013 | 60  | 102 | 5.80E-03 |
| cg11625178 | <i>TMPO</i>      | -5.421 | 63  | 99  | 5.80E-03 |
| cg23552468 | <i>MGC41945</i>  | 0.602  | 115 | 47  | 5.81E-03 |
| cg26125600 | <i>PF4V1</i>     | -0.398 | 69  | 93  | 5.81E-03 |
| cg17049328 | <i>GHRH</i>      | 2.900  | 56  | 106 | 5.81E-03 |
| cg09134003 | <i>NEUROG2</i>   | -4.966 | 115 | 47  | 5.81E-03 |

|            |                  |        |     |     |          |
|------------|------------------|--------|-----|-----|----------|
| cg19949550 | <i>ASB2</i>      | 1.753  | 37  | 125 | 5.81E-03 |
| cg07836370 | <i>GLTP</i>      | -4.290 | 73  | 89  | 5.81E-03 |
| cg03849074 | <i>ZNF306</i>    | -3.814 | 15  | 147 | 5.82E-03 |
| cg14175438 | <i>FAM3C</i>     | -2.716 | 104 | 58  | 5.82E-03 |
| cg11094938 | <i>ATP2A1</i>    | 1.703  | 77  | 85  | 5.82E-03 |
| cg01602430 | <i>WDR36</i>     | -4.816 | 116 | 46  | 5.82E-03 |
| cg08245789 | <i>FLJ25421</i>  | 3.715  | 77  | 85  | 5.82E-03 |
| cg25126812 | <i>ACTN1</i>     | -5.680 | 80  | 82  | 5.82E-03 |
| cg02169430 | <i>CHD2</i>      | -3.341 | 123 | 39  | 5.83E-03 |
| cg14260458 | <i>OCM</i>       | 0.836  | 84  | 78  | 5.83E-03 |
| cg14666892 | <i>BAK1</i>      | -5.071 | 23  | 139 | 5.83E-03 |
| cg25490411 | <i>MANBA</i>     | -5.475 | 50  | 112 | 5.83E-03 |
| cg14709524 | <i>NULP1</i>     | -4.313 | 81  | 81  | 5.83E-03 |
| cg16246410 | <i>NR4A2</i>     | -5.037 | 66  | 96  | 5.84E-03 |
| cg16019273 | <i>EIF2C4</i>    | -0.072 | 100 | 62  | 5.84E-03 |
| cg00822607 | <i>ZNF688</i>    | -3.694 | 88  | 74  | 5.84E-03 |
| cg05749161 | <i>RASA4</i>     | -5.251 | 44  | 118 | 5.85E-03 |
| cg02682905 | <i>FLJ38288</i>  | 1.585  | 57  | 104 | 5.85E-03 |
| cg24776407 | <i>MYEOV</i>     | 2.455  | 22  | 140 | 5.85E-03 |
| cg12542604 | <i>ANKS1A</i>    | -2.116 | 33  | 129 | 5.85E-03 |
| cg14121103 | <i>ABHD5</i>     | -3.074 | 46  | 116 | 5.85E-03 |
| cg10082991 | <i>RNF44</i>     | -3.921 | 83  | 79  | 5.86E-03 |
| cg06609049 | <i>THOP1</i>     | -0.711 | 50  | 112 | 5.86E-03 |
| cg15842276 | <i>MTNR1B</i>    | -0.088 | 17  | 145 | 5.86E-03 |
| cg09409398 | <i>SF3B4</i>     | -4.997 | 53  | 109 | 5.86E-03 |
| cg21306218 | <i>ZNF276</i>    | -4.816 | 86  | 76  | 5.87E-03 |
| cg18989919 | <i>C3orf36</i>   | 3.030  | 101 | 61  | 5.87E-03 |
| cg10608333 | <i>HIST1H4K</i>  | -3.294 | 115 | 47  | 5.88E-03 |
| cg00631230 | <i>VPS33A</i>    | -4.844 | 99  | 63  | 5.88E-03 |
| cg13853198 | <i>FCER1G</i>    | 0.737  | 76  | 86  | 5.88E-03 |
| cg19790294 | <i>CYBA</i>      | -4.293 | 115 | 47  | 5.89E-03 |
| cg25124223 | <i>NUP43</i>     | -5.657 | 43  | 119 | 5.89E-03 |
| cg09544918 | <i>CDON</i>      | -4.736 | 103 | 59  | 5.89E-03 |
| cg13992856 | <i>FLOT2</i>     | -3.835 | 61  | 101 | 5.89E-03 |
| cg20771670 | <i>PHLDA3</i>    | -4.921 | 143 | 19  | 5.89E-03 |
| cg19464016 | <i>PRDM1</i>     | -4.032 | 59  | 103 | 5.89E-03 |
| cg14154330 | <i>ARHGAP27</i>  | -0.323 | 90  | 72  | 5.90E-03 |
| cg20485165 | <i>WFDC12</i>    | 1.487  | 88  | 74  | 5.90E-03 |
| cg24966460 | <i>KARS</i>      | -4.143 | 104 | 58  | 5.90E-03 |
| cg09047884 | <i>TTLL1</i>     | -4.237 | 115 | 47  | 5.90E-03 |
| cg04437590 | <i>NDUFA5</i>    | -3.682 | 28  | 134 | 5.91E-03 |
| cg03050748 | <i>GHR</i>       | -4.389 | 92  | 70  | 5.91E-03 |
| cg09514038 | <i>TMC5</i>      | 2.225  | 110 | 52  | 5.91E-03 |
| cg16588061 | <i>CTSC</i>      | -5.370 | 66  | 96  | 5.91E-03 |
| cg14446808 | <i>MGAT4B</i>    | -3.418 | 86  | 76  | 5.92E-03 |
| cg23392782 | <i>RNF166</i>    | -5.104 | 108 | 54  | 5.92E-03 |
| cg22233974 | <i>MACF1</i>     | -1.352 | 99  | 63  | 5.92E-03 |
| cg09082921 | <i>UNQ3045</i>   | -2.492 | 65  | 97  | 5.92E-03 |
| cg15089387 | <i>TSLP</i>      | -1.102 | 73  | 89  | 5.92E-03 |
| cg17413703 | <i>TAF11</i>     | -4.277 | 103 | 59  | 5.92E-03 |
| cg10552385 | <i>RB1</i>       | -6.107 | 75  | 87  | 5.92E-03 |
| cg16481024 | <i>KLF10</i>     | -5.734 | 39  | 123 | 5.93E-03 |
| cg02233559 | <i>LOC283537</i> | -4.816 | 52  | 110 | 5.93E-03 |
| cg21743649 | <i>NUP98</i>     | 3.160  | 97  | 65  | 5.93E-03 |
| cg16257040 | <i>FLJ22318</i>  | -5.540 | 60  | 102 | 5.93E-03 |

|            |                  |        |     |     |          |
|------------|------------------|--------|-----|-----|----------|
| cg13970341 | <i>ABCA2</i>     | -4.464 | 79  | 83  | 5.94E-03 |
| cg19815928 | <i>ATP6V0D1</i>  | -4.958 | 72  | 90  | 5.94E-03 |
| cg25563642 | <i>RPL18A</i>    | -4.612 | 102 | 60  | 5.94E-03 |
| cg12999109 | <i>ASAH3</i>     | 1.863  | 35  | 127 | 5.95E-03 |
| cg19685066 | <i>ACTL8</i>     | 2.189  | 101 | 61  | 5.95E-03 |
| cg22151768 | <i>FBXL14</i>    | -6.085 | 89  | 73  | 5.95E-03 |
| cg26223987 | <i>ZDHHC14</i>   | -5.157 | 68  | 94  | 5.95E-03 |
| cg15003434 | <i>SURF6</i>     | -4.188 | 134 | 28  | 5.96E-03 |
| cg20981893 | <i>HSD11B2</i>   | -3.271 | 10  | 152 | 5.96E-03 |
| cg15185001 | <i>LSR</i>       | -4.460 | 55  | 107 | 5.96E-03 |
| cg19534879 | <i>CXXC4</i>     | -5.463 | 58  | 104 | 5.96E-03 |
| cg27607639 | <i>UNC119</i>    | -5.902 | 81  | 81  | 5.96E-03 |
| cg27133864 | <i>HIST1H2AE</i> | -3.637 | 112 | 50  | 5.97E-03 |
| cg09472953 | <i>EPM2A</i>     | -5.093 | 62  | 100 | 5.98E-03 |
| cg15127324 | <i>CENTD1</i>    | -3.222 | 65  | 97  | 5.98E-03 |
| cg24841244 | <i>CD3D</i>      | 1.459  | 101 | 61  | 5.98E-03 |
| cg08821669 | <i>COX6A1</i>    | -3.717 | 61  | 101 | 5.98E-03 |
| cg09682183 | <i>UNC93A</i>    | -0.286 | 72  | 90  | 5.99E-03 |
| cg19644162 | <i>TXNL4A</i>    | -5.253 | 37  | 125 | 5.99E-03 |
| cg25282410 | <i>MRPL18</i>    | -3.686 | 69  | 93  | 5.99E-03 |
| cg25671651 | <i>WDR12</i>     | -5.189 | 65  | 97  | 5.99E-03 |
| cg10080004 | <i>SYT5</i>      | -3.170 | 78  | 84  | 5.99E-03 |
| cg17592812 | <i>FAM32A</i>    | -5.561 | 47  | 115 | 5.99E-03 |
| cg03221776 | <i>MFSD3</i>     | -5.352 | 75  | 87  | 5.99E-03 |
| cg17778120 | <i>RBP2</i>      | 3.016  | 23  | 139 | 5.99E-03 |
| cg09966445 | <i>AMPH</i>      | 2.702  | 69  | 93  | 5.99E-03 |
| cg19075838 | <i>EPS8</i>      | -4.692 | 45  | 117 | 5.99E-03 |
| cg11057497 | <i>HMGCS1</i>    | -4.766 | 83  | 79  | 6.00E-03 |
| cg11579069 | <i>MYB</i>       | -3.913 | 129 | 33  | 6.00E-03 |
| cg13214422 | <i>MYOZ3</i>     | 1.220  | 121 | 41  | 6.00E-03 |
| cg17431739 | <i>MSRB2</i>     | -3.037 | 109 | 53  | 6.00E-03 |
| cg11921829 | <i>FCRL2</i>     | 0.915  | 99  | 63  | 6.01E-03 |
| cg09079593 | <i>TRIM7</i>     | -4.382 | 87  | 75  | 6.02E-03 |
| cg16254764 | <i>HDAC11</i>    | -4.306 | 37  | 125 | 6.02E-03 |
| cg27062284 | <i>RGS2</i>      | -5.846 | 81  | 81  | 6.02E-03 |
| cg05961212 | <i>ADPRH</i>     | -2.869 | 103 | 59  | 6.03E-03 |
| cg12219753 | <i>C18orf10</i>  | -5.817 | 45  | 117 | 6.03E-03 |
| cg18152517 | <i>LOC346673</i> | 2.431  | 64  | 98  | 6.03E-03 |
| cg04078896 | <i>ZGPAT</i>     | -3.552 | 87  | 75  | 6.03E-03 |
| cg04010530 | <i>NR4A2</i>     | -4.846 | 75  | 87  | 6.04E-03 |
| cg05663262 | <i>HYI</i>       | 0.825  | 129 | 33  | 6.04E-03 |
| cg07715894 | <i>MGC24665</i>  | -4.828 | 39  | 123 | 6.04E-03 |
| cg09834162 | <i>DNAJB9</i>    | -4.406 | 60  | 102 | 6.04E-03 |
| cg24713080 | <i>NDUFS8</i>    | -4.453 | 50  | 112 | 6.04E-03 |
| cg08684473 | <i>LILRB5</i>    | 1.344  | 99  | 63  | 6.04E-03 |
| cg16087263 | <i>PLA2G2F</i>   | 2.042  | 122 | 40  | 6.04E-03 |
| cg26706070 | <i>BCKDK</i>     | -4.657 | 86  | 76  | 6.04E-03 |
| cg13277939 | <i>CTAGE5</i>    | -0.177 | 67  | 94  | 6.04E-03 |
| cg08789908 | <i>HSD11B2</i>   | -3.721 | 88  | 74  | 6.04E-03 |
| cg05348870 | <i>TNFSF14</i>   | 2.634  | 38  | 124 | 6.04E-03 |
| cg04464465 | <i>CDK2AP1</i>   | -5.221 | 95  | 67  | 6.04E-03 |
| cg23158022 | <i>FLJ21742</i>  | 2.700  | 121 | 41  | 6.05E-03 |
| cg15270950 | <i>TGFB2</i>     | -4.384 | 97  | 65  | 6.05E-03 |
| cg23455897 | <i>C20orf23</i>  | -5.805 | 94  | 68  | 6.06E-03 |
| cg25081201 | <i>FXD4</i>      | 1.679  | 75  | 87  | 6.06E-03 |

|            |                 |        |     |     |          |
|------------|-----------------|--------|-----|-----|----------|
| cg24169915 | <i>FLJ25773</i> | -1.624 | 66  | 96  | 6.06E-03 |
| cg19576739 | <i>TOP2B</i>    | -6.135 | 86  | 76  | 6.06E-03 |
| cg00856375 | <i>PSMD14</i>   | -4.593 | 56  | 106 | 6.06E-03 |
| cg24947394 | <i>USP33</i>    | -5.180 | 40  | 122 | 6.07E-03 |
| cg06118312 | <i>GZMA</i>     | -1.982 | 118 | 44  | 6.07E-03 |
| cg00186954 | <i>ST5</i>      | 0.628  | 112 | 49  | 6.07E-03 |
| cg16425577 | <i>DENND3</i>   | -4.948 | 68  | 94  | 6.07E-03 |
| cg26848248 | <i>SSR1</i>     | -4.090 | 97  | 65  | 6.07E-03 |
| cg01654582 | <i>AADAT</i>    | -4.158 | 85  | 77  | 6.08E-03 |
| cg26090652 | <i>C1QTNF5</i>  | -4.377 | 55  | 107 | 6.08E-03 |
| cg00426498 | <i>MYO18A</i>   | -1.967 | 120 | 42  | 6.08E-03 |
| cg00443307 | <i>KLRG1</i>    | 0.656  | 87  | 74  | 6.08E-03 |
| cg25756129 | <i>SFRS10</i>   | -5.137 | 33  | 129 | 6.09E-03 |
| cg10000775 | <i>PDLIM3</i>   | -4.005 | 122 | 40  | 6.09E-03 |
| cg05155595 | <i>ANXA4</i>    | -0.250 | 99  | 63  | 6.09E-03 |
| cg07049929 | <i>ABCD4</i>    | -3.259 | 94  | 68  | 6.09E-03 |
| cg01808706 | <i>ITPKA</i>    | -5.648 | 81  | 81  | 6.09E-03 |
| cg03202897 | <i>FAM50B</i>   | 0.365  | 133 | 29  | 6.10E-03 |
| cg26661481 | <i>IL10RA</i>   | 2.147  | 62  | 100 | 6.10E-03 |
| cg00613255 | <i>INS</i>      | 2.096  | 66  | 96  | 6.11E-03 |
| cg00778920 | <i>PRPF19</i>   | -4.687 | 60  | 102 | 6.11E-03 |
| cg21351994 | <i>EMX1</i>     | -4.436 | 100 | 62  | 6.11E-03 |
| cg17701886 | <i>B3GNT5</i>   | -4.271 | 61  | 101 | 6.12E-03 |
| cg22855405 | <i>TINAGL1</i>  | -3.479 | 83  | 79  | 6.12E-03 |
| cg08980578 | <i>KCNK6</i>    | -3.428 | 77  | 85  | 6.12E-03 |
| cg21212066 | <i>GLG1</i>     | -4.186 | 27  | 135 | 6.12E-03 |
| cg22227689 | <i>SCPEP1</i>   | -4.311 | 35  | 127 | 6.13E-03 |
| cg05369142 | <i>ALS2CL</i>   | -5.992 | 55  | 107 | 6.13E-03 |
| cg18886444 | <i>USP4</i>     | -3.433 | 59  | 103 | 6.13E-03 |
| cg13620808 | <i>UBE2S</i>    | -4.976 | 97  | 65  | 6.13E-03 |
| cg03658471 | <i>TMEM23</i>   | -4.205 | 109 | 53  | 6.13E-03 |
| cg18075299 | <i>C14orf54</i> | 2.653  | 107 | 55  | 6.14E-03 |
| cg19986872 | <i>ACSL6</i>    | -4.297 | 115 | 47  | 6.14E-03 |
| cg05018361 | <i>NSUN6</i>    | -2.852 | 19  | 143 | 6.14E-03 |
| cg01461641 | <i>TMEM63A</i>  | -4.960 | 109 | 53  | 6.14E-03 |
| cg05940536 | <i>ACVR1B</i>   | -3.802 | 64  | 98  | 6.14E-03 |
| cg08871016 | <i>HSF2BP</i>   | -4.402 | 108 | 54  | 6.14E-03 |
| cg13044223 | <i>RPS8</i>     | -4.184 | 76  | 86  | 6.14E-03 |
| cg05815893 | <i>C17orf80</i> | -4.074 | 55  | 107 | 6.14E-03 |
| cg24492022 | <i>RPS15A</i>   | 2.610  | 32  | 130 | 6.15E-03 |
| cg03167339 | <i>MICAL-L2</i> | -4.811 | 93  | 69  | 6.15E-03 |
| cg17171485 | <i>HEBP2</i>    | -4.978 | 73  | 89  | 6.15E-03 |
| cg21281001 | <i>CTSB</i>     | -4.640 | 56  | 106 | 6.15E-03 |
| cg08541219 | <i>PAPSS1</i>   | -5.020 | 62  | 100 | 6.15E-03 |
| cg10326447 | <i>NRGN</i>     | -5.740 | 103 | 59  | 6.15E-03 |
| cg10390922 | <i>BCAS3</i>    | -3.981 | 133 | 29  | 6.15E-03 |
| cg16925970 | <i>CENPJ</i>    | -4.435 | 45  | 117 | 6.15E-03 |
| cg20273774 | <i>GNB2L1</i>   | -3.238 | 40  | 122 | 6.15E-03 |
| cg06688848 | <i>RSPRY1</i>   | -4.936 | 52  | 110 | 6.15E-03 |
| cg00620024 | <i>PPP6C</i>    | 1.132  | 125 | 37  | 6.15E-03 |
| cg17536532 | <i>KIAA0649</i> | -1.643 | 51  | 111 | 6.15E-03 |
| cg05062178 | <i>ITGB5</i>    | -1.653 | 33  | 129 | 6.16E-03 |
| cg24778383 | <i>TNFSF7</i>   | -5.341 | 63  | 99  | 6.16E-03 |
| cg01611640 | <i>LOC58486</i> | -4.162 | 23  | 139 | 6.16E-03 |
| cg08923060 | <i>TRIAP1</i>   | -5.140 | 63  | 99  | 6.16E-03 |

|            |                  |        |     |     |          |
|------------|------------------|--------|-----|-----|----------|
| cg09788866 | <i>ERCC3</i>     | -3.028 | 71  | 91  | 6.16E-03 |
| cg10880863 | <i>SEC8L1</i>    | -3.754 | 47  | 115 | 6.17E-03 |
| cg24523000 | <i>GABRA1</i>    | -1.668 | 55  | 107 | 6.17E-03 |
| cg25058957 | <i>RAXL1</i>     | 3.698  | 72  | 90  | 6.17E-03 |
| cg12403575 | <i>TRADD</i>     | -4.702 | 124 | 38  | 6.17E-03 |
| cg23213170 | <i>FCMD</i>      | -5.454 | 61  | 101 | 6.17E-03 |
| cg27035169 | <i>SLC7A8</i>    | -1.793 | 94  | 68  | 6.17E-03 |
| cg26248486 | <i>C12orf58</i>  | -5.738 | 80  | 82  | 6.17E-03 |
| cg01438829 | <i>TMEM97</i>    | -4.758 | 62  | 100 | 6.17E-03 |
| cg24454435 | <i>MAK3</i>      | -4.784 | 51  | 111 | 6.17E-03 |
| cg22172230 | <i>SWAP70</i>    | -5.995 | 104 | 58  | 6.17E-03 |
| cg10061247 | <i>TMEM115</i>   | -5.172 | 54  | 108 | 6.18E-03 |
| cg14509125 | <i>FLJ20512</i>  | -5.066 | 84  | 78  | 6.18E-03 |
| cg17895149 | <i>PLAGL1</i>    | 0.761  | 70  | 92  | 6.18E-03 |
| cg20673481 | <i>KCNS3</i>     | -4.365 | 83  | 79  | 6.18E-03 |
| cg04368716 | <i>C14orf153</i> | -5.811 | 50  | 112 | 6.18E-03 |
| cg08983975 | <i>TCOF1</i>     | -5.250 | 104 | 58  | 6.19E-03 |
| cg17685111 | <i>BMP8A</i>     | -0.875 | 56  | 106 | 6.20E-03 |
| cg26436158 | <i>SEC6L1</i>    | -5.293 | 96  | 66  | 6.20E-03 |
| cg03135127 | <i>TRMT1</i>     | -3.743 | 72  | 90  | 6.20E-03 |
| cg05562817 | <i>MGC33839</i>  | -4.314 | 31  | 131 | 6.20E-03 |
| cg15755406 | <i>MGC10471</i>  | -4.733 | 99  | 63  | 6.20E-03 |
| cg24866437 | <i>ALPK1</i>     | 2.328  | 104 | 58  | 6.20E-03 |
| cg04678793 | <i>LY6E</i>      | -4.634 | 81  | 81  | 6.21E-03 |
| cg10889070 | <i>RNPS1</i>     | -0.603 | 127 | 35  | 6.21E-03 |
| cg15974062 | <i>COPS7A</i>    | -4.120 | 44  | 118 | 6.21E-03 |
| cg05989429 | <i>ABCA7</i>     | -5.185 | 45  | 117 | 6.22E-03 |
| cg14812492 | <i>DGKH</i>      | -4.878 | 101 | 61  | 6.22E-03 |
| cg25890048 | <i>OR5I1</i>     | 1.829  | 139 | 23  | 6.23E-03 |
| cg24284910 | <i>SNX14</i>     | -3.788 | 29  | 133 | 6.23E-03 |
| cg20372689 | <i>RCN2</i>      | -3.844 | 108 | 54  | 6.23E-03 |
| cg08519865 | <i>CRSP9</i>     | -4.699 | 88  | 74  | 6.24E-03 |
| cg22650146 | <i>DUSP10</i>    | -4.021 | 61  | 101 | 6.24E-03 |
| cg09825414 | <i>TCOF1</i>     | 2.053  | 93  | 69  | 6.24E-03 |
| cg12053284 | <i>SYT4</i>      | -4.576 | 79  | 83  | 6.25E-03 |
| cg00319761 | <i>PKMYT1</i>    | -5.802 | 69  | 93  | 6.25E-03 |
| cg14532644 | <i>FECH</i>      | -3.784 | 136 | 26  | 6.25E-03 |
| cg22981461 | <i>OTUB2</i>     | -3.308 | 116 | 46  | 6.26E-03 |
| cg21458041 | <i>TNP2</i>      | 1.004  | 91  | 71  | 6.26E-03 |
| cg16196602 | <i>SF3B2</i>     | -3.245 | 66  | 96  | 6.26E-03 |
| cg03139377 | <i>SLC6A12</i>   | -0.202 | 121 | 41  | 6.27E-03 |
| cg12958836 | <i>FOXJ2</i>     | -4.607 | 93  | 69  | 6.27E-03 |
| cg12297221 | <i>ART5</i>      | -4.903 | 104 | 58  | 6.27E-03 |
| cg25778479 | <i>ANKMY2</i>    | -0.839 | 112 | 50  | 6.27E-03 |
| cg22324153 | <i>SLC35D2</i>   | 2.094  | 85  | 74  | 6.27E-03 |
| cg09190408 | <i>TBC1D10C</i>  | 1.785  | 88  | 74  | 6.28E-03 |
| cg26956535 | <i>LAG3</i>      | 3.010  | 78  | 84  | 6.28E-03 |
| cg25299176 | <i>YWHAE</i>     | -2.051 | 60  | 102 | 6.28E-03 |
| cg12124478 | <i>IQGAP3</i>    | -4.346 | 112 | 50  | 6.28E-03 |
| cg05203877 | <i>SLC8A3</i>    | -4.066 | 49  | 113 | 6.29E-03 |
| cg11193041 | <i>GSTZ1</i>     | -5.114 | 112 | 50  | 6.29E-03 |
| cg23055159 | <i>COMMD8</i>    | -5.114 | 106 | 56  | 6.29E-03 |
| cg22294908 | <i>ZHX3</i>      | 2.610  | 108 | 54  | 6.29E-03 |
| cg02775617 | <i>ARHGAP12</i>  | -1.358 | 40  | 122 | 6.29E-03 |
| cg13047596 | <i>UNQ830</i>    | 5.170  | 45  | 117 | 6.29E-03 |

|            |                  |        |     |     |          |
|------------|------------------|--------|-----|-----|----------|
| cg18693704 | <i>CMTM4</i>     | -2.074 | 73  | 89  | 6.30E-03 |
| cg11017269 | <i>RHOBTB3</i>   | -5.641 | 116 | 46  | 6.30E-03 |
| cg14306534 | <i>ZBTB2</i>     | -4.663 | 43  | 119 | 6.30E-03 |
| cg20168375 | <i>LOC90624</i>  | -5.013 | 107 | 55  | 6.30E-03 |
| cg07697569 | <i>H2AFX</i>     | -4.816 | 92  | 70  | 6.31E-03 |
| cg25847835 | <i>FBXO38</i>    | -4.156 | 57  | 105 | 6.31E-03 |
| cg17605084 | <i>HEM1</i>      | 0.105  | 80  | 82  | 6.31E-03 |
| cg26285698 | <i>C16orf54</i>  | 1.184  | 48  | 114 | 6.32E-03 |
| cg20199333 | <i>F2</i>        | 2.738  | 59  | 103 | 6.33E-03 |
| cg19435264 | <i>SLC6A7</i>    | -3.860 | 93  | 69  | 6.33E-03 |
| cg06353948 | <i>SETX</i>      | 2.682  | 53  | 109 | 6.33E-03 |
| cg06755819 | <i>RCN1</i>      | -0.729 | 47  | 115 | 6.33E-03 |
| cg05660795 | <i>IGFBP1</i>    | -2.082 | 95  | 67  | 6.33E-03 |
| cg12641660 | <i>TTF2</i>      | -5.300 | 77  | 85  | 6.33E-03 |
| cg01802635 | <i>TXNDC5</i>    | -4.390 | 64  | 98  | 6.34E-03 |
| cg09386615 | <i>GLIS3</i>     | 1.312  | 86  | 70  | 6.34E-03 |
| cg15223781 | <i>FER</i>       | -3.856 | 28  | 134 | 6.34E-03 |
| cg01888411 | <i>ABTB2</i>     | -3.434 | 94  | 68  | 6.35E-03 |
| cg09172980 | <i>NAT8</i>      | -1.541 | 92  | 70  | 6.35E-03 |
| cg08529259 | <i>GCSH</i>      | -5.102 | 61  | 101 | 6.35E-03 |
| cg14404298 | <i>CYP8B1</i>    | -0.677 | 143 | 19  | 6.35E-03 |
| cg25368651 | <i>C11orf47</i>  | 2.154  | 111 | 51  | 6.36E-03 |
| cg26829131 | <i>HOXC9</i>     | -4.188 | 61  | 101 | 6.36E-03 |
| cg26977045 | <i>TIGD3</i>     | -3.784 | 75  | 87  | 6.36E-03 |
| cg21942082 | <i>ACOT12</i>    | -4.455 | 70  | 92  | 6.36E-03 |
| cg13210534 | <i>HSPB2</i>     | -0.619 | 55  | 107 | 6.36E-03 |
| cg17190608 | <i>CUTL2</i>     | -4.616 | 91  | 71  | 6.36E-03 |
| cg20164558 | <i>PPP2R5D</i>   | -3.445 | 61  | 101 | 6.36E-03 |
| cg05241571 | <i>UNQ467</i>    | 2.519  | 86  | 76  | 6.36E-03 |
| cg24505341 | <i>CADPS</i>     | -1.187 | 26  | 136 | 6.37E-03 |
| cg24723331 | <i>ST8SIA1</i>   | -4.594 | 73  | 89  | 6.37E-03 |
| cg24010952 | <i>BDKRB2</i>    | -1.823 | 44  | 118 | 6.37E-03 |
| cg14242091 | <i>TOP3B</i>     | -4.104 | 47  | 115 | 6.38E-03 |
| cg12360373 | <i>ATXN2L</i>    | -3.955 | 44  | 118 | 6.38E-03 |
| cg15974053 | <i>DHRS10</i>    | -4.037 | 53  | 109 | 6.38E-03 |
| cg24776019 | <i>HYPB</i>      | 1.848  | 109 | 53  | 6.38E-03 |
| cg05072951 | <i>CAPN1</i>     | -5.283 | 98  | 64  | 6.39E-03 |
| cg20002248 | <i>ACN9</i>      | -4.479 | 70  | 92  | 6.39E-03 |
| cg21968169 | <i>LOC338799</i> | -5.020 | 115 | 47  | 6.39E-03 |
| cg26372557 | <i>TICAM1</i>    | 4.509  | 62  | 100 | 6.40E-03 |
| cg15774495 | <i>GRB10</i>     | -3.895 | 93  | 69  | 6.40E-03 |
| cg08670691 | <i>CCDC27</i>    | 0.915  | 29  | 133 | 6.41E-03 |
| cg27498304 | <i>EYA3</i>      | -5.926 | 62  | 100 | 6.41E-03 |
| cg25003924 | <i>ARPP-19</i>   | 2.619  | 60  | 102 | 6.41E-03 |
| cg27143049 | <i>PDE3B</i>     | -2.081 | 38  | 124 | 6.42E-03 |
| cg25537774 | <i>AGPAT2</i>    | -5.716 | 73  | 89  | 6.42E-03 |
| cg12836863 | <i>BRCA2</i>     | 1.321  | 84  | 78  | 6.43E-03 |
| cg20125091 | <i>GFI1</i>      | -1.426 | 82  | 80  | 6.43E-03 |
| cg10909324 | <i>EHMT2</i>     | -4.657 | 110 | 52  | 6.44E-03 |
| cg09539538 | <i>C20orf42</i>  | 0.187  | 31  | 131 | 6.44E-03 |
| cg18811423 | <i>PNPT1</i>     | -4.829 | 89  | 73  | 6.45E-03 |
| cg06235991 | <i>L3MBTL2</i>   | -3.935 | 91  | 71  | 6.45E-03 |
| cg00888479 | <i>SLC24A3</i>   | -2.138 | 29  | 133 | 6.45E-03 |
| cg16979445 | <i>NRM</i>       | 2.380  | 53  | 108 | 6.46E-03 |
| cg12406460 | <i>ATP5L</i>     | -5.161 | 65  | 97  | 6.46E-03 |

|            |              |        |     |     |          |
|------------|--------------|--------|-----|-----|----------|
| cg17003970 | CHFR         | 2.573  | 69  | 93  | 6.46E-03 |
| cg02648999 | TGFBRAP1     | -5.019 | 64  | 98  | 6.46E-03 |
| cg01731341 | FGF6         | 2.524  | 83  | 79  | 6.46E-03 |
| cg14341579 | IRS2         | -5.430 | 120 | 42  | 6.46E-03 |
| cg22478328 | YWHAH        | -4.494 | 90  | 72  | 6.47E-03 |
| cg22560190 | CNTN1        | -3.982 | 78  | 84  | 6.47E-03 |
| cg12635664 | SAR1A        | -4.354 | 62  | 100 | 6.47E-03 |
| cg08658594 | TAS2R13      | 2.151  | 98  | 64  | 6.47E-03 |
| cg22325646 | RND2         | -3.977 | 45  | 117 | 6.47E-03 |
| cg23792364 | C19orf6      | -3.490 | 77  | 85  | 6.47E-03 |
| cg11854007 | RP11-49G10.8 | -1.758 | 97  | 65  | 6.48E-03 |
| cg13758659 | SDC1         | -4.123 | 119 | 43  | 6.48E-03 |
| cg04106785 | CDK5R1       | 1.030  | 103 | 59  | 6.49E-03 |
| cg10493166 | PTGS1        | -4.359 | 99  | 63  | 6.50E-03 |
| cg05111036 | HIGD1A       | -3.686 | 62  | 100 | 6.50E-03 |
| cg19297688 | INSL4        | 2.391  | 127 | 35  | 6.50E-03 |
| cg06564900 | FIGN         | -2.883 | 72  | 90  | 6.50E-03 |
| cg08439468 | BICD2        | -4.972 | 85  | 77  | 6.50E-03 |
| cg20314660 | DDX39        | -5.703 | 115 | 47  | 6.50E-03 |
| cg06397837 | HOXA13       | -4.316 | 78  | 84  | 6.50E-03 |
| cg12467191 | CSK          | -4.316 | 113 | 49  | 6.51E-03 |
| cg17389295 | FBL          | -5.041 | 98  | 64  | 6.51E-03 |
| cg06501084 | KCNH5        | 0.493  | 47  | 114 | 6.52E-03 |
| cg24399405 | C16orf35     | 3.296  | 55  | 107 | 6.53E-03 |
| cg24355048 | CTSG         | 0.629  | 124 | 38  | 6.53E-03 |
| cg24816455 | SEMA3B       | -0.934 | 137 | 25  | 6.53E-03 |
| cg00298951 | CMKLR1       | 0.633  | 41  | 121 | 6.54E-03 |
| cg17099569 | GLI2         | 0.505  | 54  | 101 | 6.54E-03 |
| cg01492649 | FLJ22104     | -4.094 | 100 | 62  | 6.55E-03 |
| cg11979382 | BCDIN3       | -4.986 | 74  | 88  | 6.56E-03 |
| cg01078434 | MAS1L        | 2.723  | 80  | 82  | 6.56E-03 |
| cg03160815 | NPB          | -3.017 | 105 | 57  | 6.56E-03 |
| cg00890257 | DEGS2        | -4.218 | 84  | 78  | 6.57E-03 |
| cg08986416 | DMXL2        | -3.866 | 116 | 46  | 6.58E-03 |
| cg20538819 | PTPN14       | -4.774 | 77  | 85  | 6.58E-03 |
| cg00033516 | KLF3         | -4.015 | 73  | 89  | 6.58E-03 |
| cg27187881 | NAGA         | -3.596 | 42  | 120 | 6.58E-03 |
| cg19379303 | AYP1         | -6.137 | 56  | 106 | 6.58E-03 |
| cg21289015 | USH1C        | -3.468 | 74  | 88  | 6.58E-03 |
| cg24987706 | GPA33        | 2.695  | 80  | 82  | 6.58E-03 |
| cg24124398 | ACLY         | -5.703 | 49  | 113 | 6.58E-03 |
| cg14076411 | RNGTT        | -4.522 | 71  | 91  | 6.58E-03 |
| cg05434957 | ICA1         | -5.567 | 74  | 88  | 6.59E-03 |
| cg22580905 | TIMELESS     | -4.418 | 67  | 95  | 6.59E-03 |
| cg22901840 | DIRAS3       | 0.844  | 71  | 91  | 6.59E-03 |
| cg22841169 | YPEL5        | -4.914 | 59  | 103 | 6.59E-03 |
| cg08308257 | SMNDC1       | -4.572 | 79  | 83  | 6.59E-03 |
| cg11943820 | KIAA1754     | 2.477  | 88  | 74  | 6.59E-03 |
| cg01254505 | BST2         | -3.377 | 73  | 89  | 6.60E-03 |
| cg09539438 | NTRK2        | -4.738 | 112 | 50  | 6.60E-03 |
| cg09837943 | ZIM2         | 1.309  | 47  | 115 | 6.61E-03 |
| cg22004151 | PPP2R5D      | -4.689 | 68  | 94  | 6.61E-03 |
| cg22185378 | WBSCR14      | 4.414  | 105 | 57  | 6.61E-03 |
| cg00718748 | ZNF624       | -4.918 | 53  | 109 | 6.61E-03 |
| cg24738006 | SS18L1       | -5.323 | 50  | 112 | 6.61E-03 |

|            |                       |        |     |     |          |
|------------|-----------------------|--------|-----|-----|----------|
| cg17451138 | <i>C12orf38</i>       | -5.285 | 92  | 70  | 6.62E-03 |
| cg02162069 | <i>ZIM2</i>           | 0.971  | 80  | 82  | 6.62E-03 |
| cg18878432 | <i>HOXB6</i>          | -0.222 | 124 | 38  | 6.62E-03 |
| cg10893007 | <i>NBR2</i>           | -4.389 | 79  | 83  | 6.62E-03 |
| cg22956956 | <i>TFRC</i>           | -3.895 | 106 | 56  | 6.62E-03 |
| cg17651821 | <i>HIST1H4L</i>       | -3.717 | 59  | 103 | 6.63E-03 |
| cg06677140 | <i>MSX1</i>           | -4.676 | 125 | 37  | 6.63E-03 |
| cg21032203 | <i>ZNF265</i>         | -4.346 | 66  | 96  | 6.63E-03 |
| cg07195282 | <i>ZNF563</i>         | -4.909 | 73  | 89  | 6.64E-03 |
| cg24384676 | <i>SLC25A21</i>       | -3.366 | 95  | 67  | 6.64E-03 |
| cg19807685 | <i>HSD17B2</i>        | 1.422  | 59  | 103 | 6.65E-03 |
| cg10503232 | <i>KCNQ1DN</i>        | 1.800  | 72  | 90  | 6.65E-03 |
| cg05473871 | <i>ADAMTSL5</i>       | -3.514 | 100 | 62  | 6.66E-03 |
| cg08718071 | <i>HDCC3</i>          | -4.391 | 43  | 119 | 6.66E-03 |
| cg00933411 | <i>DLC1</i>           | -0.319 | 128 | 34  | 6.66E-03 |
| cg14252569 | <i>DACT1</i>          | -3.877 | 50  | 112 | 6.67E-03 |
| cg15992730 | <i>GDF3</i>           | -2.157 | 138 | 24  | 6.67E-03 |
| cg00970385 | <i>FLJ38725</i>       | -2.093 | 41  | 121 | 6.67E-03 |
| cg02497428 | <i>IGSF6</i>          | 2.519  | 29  | 133 | 6.67E-03 |
| cg11487705 | <i>OXCT1</i>          | -5.011 | 46  | 116 | 6.67E-03 |
| cg14072120 | <i>RAC2</i>           | -2.979 | 39  | 123 | 6.67E-03 |
| cg25412384 | <i>LRP10</i>          | -5.279 | 82  | 80  | 6.67E-03 |
| cg06168324 | <i>RBMS1</i>          | -4.750 | 102 | 60  | 6.67E-03 |
| cg23096644 | <i>PEG10</i>          | -3.987 | 80  | 82  | 6.67E-03 |
| cg15269863 | <i>PRSS35</i>         | -2.663 | 69  | 93  | 6.69E-03 |
| cg15396310 | <i>BCL7B</i>          | -5.472 | 111 | 51  | 6.69E-03 |
| cg13704403 | <i>DGKQ</i>           | -4.535 | 103 | 59  | 6.69E-03 |
| cg17509872 | <i>CNOT7</i>          | -3.321 | 75  | 87  | 6.70E-03 |
| cg02738086 | <i>POLR3H</i>         | 0.896  | 87  | 75  | 6.70E-03 |
| cg19166626 | <i>DNAJC3</i>         | -5.138 | 44  | 118 | 6.70E-03 |
| cg00565075 | <i>EIF3S6IP</i>       | -2.122 | 54  | 108 | 6.70E-03 |
| cg16746631 | <i>IMPA1</i>          | -4.994 | 107 | 55  | 6.71E-03 |
| cg01346589 | <i>RCC2</i>           | -4.440 | 61  | 101 | 6.71E-03 |
| cg02247582 | <i>ZNF512</i>         | -4.712 | 118 | 44  | 6.71E-03 |
| cg25162921 | <i>MTAP</i>           | -1.164 | 67  | 95  | 6.72E-03 |
| cg10960626 | <i>C8orf45</i>        | 1.635  | 93  | 68  | 6.72E-03 |
| cg27546682 | <i>STK40</i>          | -5.314 | 92  | 70  | 6.72E-03 |
| cg22082462 | <i>CPNE6</i>          | 0.926  | 141 | 21  | 6.72E-03 |
| cg11833861 | <i>TMEM98</i>         | -2.937 | 76  | 85  | 6.72E-03 |
| cg05154390 | <i>MRPS15</i>         | -2.721 | 116 | 46  | 6.73E-03 |
| cg07443954 | <i>CA11</i>           | -5.114 | 100 | 62  | 6.73E-03 |
| cg14808739 | <i>SREBF1</i>         | 1.173  | 91  | 71  | 6.73E-03 |
| cg15459742 | <i>CTNNAL1</i>        | -5.042 | 48  | 114 | 6.73E-03 |
| cg18384643 | <i>MRPS33</i>         | -3.180 | 80  | 82  | 6.73E-03 |
| cg06171787 | <i>MRPL16</i>         | -3.458 | 81  | 81  | 6.73E-03 |
| cg15919045 | <i>NFIL3</i>          | -6.325 | 104 | 58  | 6.73E-03 |
| cg00099550 | <i>HNRPF</i>          | -4.554 | 76  | 86  | 6.73E-03 |
| cg06745740 | <i>HGF</i>            | -2.843 | 99  | 63  | 6.74E-03 |
| cg24115040 | <i>DLX5</i>           | -2.743 | 71  | 91  | 6.74E-03 |
| cg07763768 | <i>C9orf45</i>        | 1.481  | 69  | 93  | 6.74E-03 |
| cg13379763 | <i>ANKFZp434O0527</i> | 1.485  | 125 | 37  | 6.74E-03 |
| cg26984624 | <i>ANK1</i>           | -0.779 | 90  | 72  | 6.74E-03 |
| cg11874272 | <i>CD86</i>           | 0.417  | 75  | 85  | 6.75E-03 |
| cg15786541 | <i>PVRL3</i>          | -4.836 | 61  | 101 | 6.75E-03 |
| cg19434303 | <i>WARS</i>           | -4.086 | 55  | 107 | 6.77E-03 |

|            |                 |        |     |     |          |
|------------|-----------------|--------|-----|-----|----------|
| cg16108132 | <i>ANXA7</i>    | -4.202 | 81  | 81  | 6.78E-03 |
| cg13701109 | <i>ADAMTS19</i> | -2.836 | 97  | 65  | 6.78E-03 |
| cg20557567 | <i>RPS18</i>    | -4.572 | 96  | 66  | 6.78E-03 |
| cg25307641 | <i>SURF2</i>    | 2.272  | 29  | 133 | 6.79E-03 |
| cg19404832 | <i>TFAP2D</i>   | -2.636 | 58  | 104 | 6.79E-03 |
| cg16719404 | <i>CD2</i>      | -0.773 | 110 | 52  | 6.80E-03 |
| cg25302370 | <i>C6orf165</i> | -3.351 | 42  | 120 | 6.80E-03 |
| cg03803589 | <i>STYX</i>     | -4.855 | 42  | 120 | 6.80E-03 |
| cg03875195 | <i>SLC30A3</i>  | -2.825 | 108 | 54  | 6.80E-03 |
| cg03513363 | <i>DUSP15</i>   | -3.324 | 83  | 79  | 6.80E-03 |
| cg18371284 | <i>ZFP1</i>     | -4.878 | 95  | 67  | 6.80E-03 |
| cg02968557 | <i>HSPB9</i>    | 2.633  | 51  | 111 | 6.81E-03 |
| cg20252016 | <i>CDCA5</i>    | -5.840 | 64  | 98  | 6.81E-03 |
| cg05174079 | <i>MGC42630</i> | 2.011  | 96  | 66  | 6.81E-03 |
| cg08353062 | <i>UGDH</i>     | -4.845 | 46  | 116 | 6.81E-03 |
| cg24053619 | <i>KIAA1841</i> | -5.795 | 77  | 85  | 6.81E-03 |
| cg21825027 | <i>SH3YL1</i>   | -5.598 | 71  | 91  | 6.82E-03 |
| cg12939547 | <i>C6orf27</i>  | 2.800  | 80  | 82  | 6.82E-03 |
| cg17317962 | <i>ACTG1</i>    | -4.610 | 98  | 64  | 6.82E-03 |
| cg14580737 | <i>RFXANK</i>   | 0.180  | 91  | 68  | 6.82E-03 |
| cg05922972 | <i>TSPAN3</i>   | -5.894 | 99  | 63  | 6.82E-03 |
| cg24892510 | <i>ZNF415</i>   | -4.134 | 97  | 65  | 6.83E-03 |
| cg09044738 | <i>FAM12A</i>   | 2.664  | 68  | 94  | 6.83E-03 |
| cg19482581 | <i>ABHD4</i>    | -4.641 | 76  | 86  | 6.83E-03 |
| cg07068616 | <i>ORC5L</i>    | -4.636 | 55  | 107 | 6.83E-03 |
| cg07536920 | <i>RORB</i>     | -4.997 | 62  | 100 | 6.84E-03 |
| cg16547529 | <i>FLJ33790</i> | 0.456  | 122 | 40  | 6.84E-03 |
| cg17914753 | <i>CYP2S1</i>   | -4.188 | 104 | 58  | 6.84E-03 |
| cg22113807 | <i>FLJ13149</i> | -1.691 | 104 | 58  | 6.84E-03 |
| cg01294702 | <i>FOXJ1</i>    | -2.869 | 107 | 55  | 6.84E-03 |
| cg23142935 | <i>CDR2</i>     | -4.976 | 63  | 99  | 6.84E-03 |
| cg03070194 | <i>GSTM2</i>    | -4.607 | 77  | 85  | 6.84E-03 |
| cg04387658 | <i>CD86</i>     | 1.328  | 77  | 85  | 6.84E-03 |
| cg18094221 | <i>TCTA</i>     | -2.071 | 24  | 138 | 6.84E-03 |
| cg16879115 | <i>APOBEC1</i>  | 1.033  | 69  | 93  | 6.85E-03 |
| cg23909343 | <i>PPP2R5A</i>  | -3.004 | 100 | 62  | 6.85E-03 |
| cg14527802 | <i>TNFAIP3</i>  | -4.679 | 100 | 62  | 6.86E-03 |
| cg18876189 | <i>FGB</i>      | 2.322  | 100 | 62  | 6.86E-03 |
| cg00107187 | <i>FLJ42486</i> | -1.333 | 23  | 139 | 6.87E-03 |
| cg05380982 | <i>KCNJ6</i>    | -1.863 | 11  | 151 | 6.87E-03 |
| cg11957880 | <i>UBE2N</i>    | -5.836 | 44  | 118 | 6.87E-03 |
| cg12893143 | <i>UNC5A</i>    | -4.202 | 82  | 80  | 6.87E-03 |
| cg01192952 | <i>LGALS14</i>  | 0.492  | 46  | 116 | 6.87E-03 |
| cg13806135 | <i>PCDH17</i>   | -4.487 | 70  | 92  | 6.87E-03 |
| cg07799434 | <i>MGC2803</i>  | -3.677 | 42  | 120 | 6.88E-03 |
| cg22511947 | <i>FN1</i>      | -3.353 | 37  | 125 | 6.88E-03 |
| cg08987989 | <i>PGGT1B</i>   | 0.332  | 123 | 39  | 6.89E-03 |
| cg10866709 | <i>GATA4</i>    | -3.336 | 62  | 100 | 6.89E-03 |
| cg01678893 | <i>CALR</i>     | -4.876 | 95  | 67  | 6.90E-03 |
| cg09399047 | <i>DALRD3</i>   | -5.176 | 66  | 96  | 6.90E-03 |
| cg22444610 | <i>KCTD18</i>   | -3.461 | 44  | 118 | 6.90E-03 |
| cg07505695 | <i>SPG21</i>    | -3.956 | 84  | 78  | 6.90E-03 |
| cg27182551 | <i>RB1</i>      | 2.263  | 50  | 112 | 6.91E-03 |
| cg06751597 | <i>SNAP23</i>   | -1.810 | 67  | 95  | 6.91E-03 |
| cg13409216 | <i>SUPV3L1</i>  | -5.305 | 49  | 113 | 6.91E-03 |

|            |                   |        |     |     |          |
|------------|-------------------|--------|-----|-----|----------|
| cg10895130 | <i>BNIP1</i>      | 2.003  | 72  | 90  | 6.91E-03 |
| cg15415545 | <i>SULT1A3</i>    | -4.949 | 88  | 74  | 6.91E-03 |
| cg23356993 | <i>TIMP2</i>      | -5.954 | 67  | 95  | 6.92E-03 |
| cg08610361 | <i>E2F7</i>       | -4.824 | 16  | 145 | 6.92E-03 |
| cg26446827 | <i>ZNF133</i>     | -3.792 | 62  | 100 | 6.92E-03 |
| cg00686623 | <i>CAPN1</i>      | -4.356 | 55  | 107 | 6.92E-03 |
| cg23988310 | <i>SCG2</i>       | -3.375 | 54  | 108 | 6.93E-03 |
| cg09425215 | <i>CHD2</i>       | -3.028 | 116 | 45  | 6.93E-03 |
| cg20938359 | <i>SLC6A12</i>    | -2.145 | 103 | 59  | 6.93E-03 |
| cg10091705 | <i>PPP1R12B</i>   | -4.653 | 65  | 97  | 6.93E-03 |
| cg15432938 | <i>FRAT1</i>      | -4.561 | 102 | 60  | 6.93E-03 |
| cg25605045 | <i>ANKRD39</i>    | -5.803 | 70  | 92  | 6.93E-03 |
| cg26661897 | <i>RTCD1</i>      | -4.164 | 35  | 127 | 6.94E-03 |
| cg22187826 | <i>EA2F</i>       | -5.691 | 60  | 102 | 6.94E-03 |
| cg11208235 | <i>BCAR3</i>      | -5.029 | 58  | 104 | 6.94E-03 |
| cg17108383 | <i>PCDHGC5</i>    | 3.369  | 56  | 106 | 6.94E-03 |
| cg13652556 | <i>SEPX1</i>      | -3.886 | 93  | 69  | 6.94E-03 |
| cg24216701 | <i>CDX1</i>       | 3.526  | 88  | 74  | 6.95E-03 |
| cg10273210 | <i>TRIM59</i>     | -3.770 | 17  | 145 | 6.95E-03 |
| cg22973038 | <i>TUFM</i>       | -4.315 | 69  | 93  | 6.95E-03 |
| cg21047206 | <i>PDE4DIP</i>    | 0.782  | 50  | 112 | 6.96E-03 |
| cg14610746 | <i>CLN6</i>       | -3.338 | 85  | 77  | 6.96E-03 |
| cg23322316 | <i>SPATA4</i>     | -3.890 | 45  | 117 | 6.96E-03 |
| cg24815853 | <i>KLK12</i>      | -1.345 | 107 | 55  | 6.96E-03 |
| cg06866862 | <i>ZNF512</i>     | -3.368 | 47  | 115 | 6.96E-03 |
| cg22134325 | <i>NPAS4</i>      | -1.084 | 42  | 120 | 6.97E-03 |
| cg04970352 | <i>ALX4</i>       | -2.992 | 72  | 90  | 6.97E-03 |
| cg14596431 | <i>B3GNTL1</i>    | -4.754 | 74  | 88  | 6.97E-03 |
| cg23144899 | <i>CRYGC</i>      | 1.718  | 136 | 26  | 6.97E-03 |
| cg23089840 | <i>LRRC3</i>      | -2.135 | 104 | 57  | 6.97E-03 |
| cg19965810 | <i>KCNH7</i>      | -3.336 | 108 | 54  | 6.98E-03 |
| cg01514487 | <i>MYO1A</i>      | 0.730  | 110 | 52  | 6.99E-03 |
| cg08223748 | <i>MEF2C</i>      | -5.030 | 63  | 99  | 6.99E-03 |
| cg07516225 | <i>C8orf41</i>    | -3.361 | 59  | 103 | 6.99E-03 |
| cg09390932 | <i>B3GNT1</i>     | 2.481  | 93  | 69  | 6.99E-03 |
| cg24608774 | <i>STEAP1</i>     | -3.950 | 36  | 126 | 6.99E-03 |
| cg06422693 | <i>OCIAD1</i>     | -5.623 | 49  | 113 | 6.99E-03 |
| cg13643585 | <i>HOXB9</i>      | -4.541 | 69  | 93  | 6.99E-03 |
| cg18674980 | <i>CA3</i>        | -4.181 | 113 | 49  | 7.00E-03 |
| cg00841581 | <i>STAG1</i>      | -4.756 | 27  | 135 | 7.00E-03 |
| cg21023001 | <i>C1QR1</i>      | -0.286 | 116 | 46  | 7.01E-03 |
| cg19001794 | <i>HIC1</i>       | -4.901 | 42  | 120 | 7.01E-03 |
| cg03614664 | <i>RBX1</i>       | -5.331 | 70  | 92  | 7.02E-03 |
| cg27285056 | <i>NAPSA</i>      | 0.782  | 19  | 143 | 7.02E-03 |
| cg00183916 | <i>HS3ST3B1</i>   | -4.993 | 86  | 76  | 7.02E-03 |
| cg08245487 | <i>GSG1</i>       | 3.051  | 92  | 70  | 7.02E-03 |
| cg24908058 | <i>CGB5</i>       | 2.197  | 91  | 71  | 7.02E-03 |
| cg08675585 | <i>C14orf166B</i> | 1.151  | 119 | 43  | 7.02E-03 |
| cg20337385 | <i>PNN</i>        | -4.215 | 133 | 29  | 7.03E-03 |
| cg10539507 | <i>NKX6-1</i>     | -3.093 | 101 | 61  | 7.04E-03 |
| cg16119128 | <i>FLJ43339</i>   | -3.730 | 121 | 41  | 7.04E-03 |
| cg16522484 | <i>C14orf49</i>   | 1.646  | 113 | 49  | 7.04E-03 |
| cg00295206 | <i>RAB7</i>       | -4.405 | 53  | 109 | 7.05E-03 |
| cg25446086 | <i>SYT11</i>      | -3.503 | 98  | 64  | 7.05E-03 |
| cg27400772 | <i>DPF1</i>       | -2.046 | 51  | 111 | 7.05E-03 |

|            |                 |        |     |     |          |
|------------|-----------------|--------|-----|-----|----------|
| cg18983672 | <i>FOXE3</i>    | 1.905  | 126 | 36  | 7.06E-03 |
| cg14495243 | <i>CCDC59</i>   | -4.329 | 92  | 70  | 7.06E-03 |
| cg14951292 | <i>HMOX2</i>    | 0.559  | 43  | 119 | 7.06E-03 |
| cg16639595 | <i>SRI</i>      | 0.917  | 93  | 69  | 7.06E-03 |
| cg09819033 | <i>CREBL2</i>   | -5.465 | 79  | 83  | 7.06E-03 |
| cg02047577 | <i>UCKL1</i>    | -5.753 | 53  | 109 | 7.07E-03 |
| cg21618439 | <i>CORO2A</i>   | -4.885 | 35  | 127 | 7.07E-03 |
| cg18519564 | <i>RCL1</i>     | -4.880 | 108 | 54  | 7.08E-03 |
| cg09201719 | <i>CYP17A1</i>  | 2.393  | 70  | 92  | 7.08E-03 |
| cg00197641 | <i>MRPL52</i>   | -4.463 | 69  | 93  | 7.08E-03 |
| cg22313024 | <i>UQCRB</i>    | -2.983 | 95  | 67  | 7.08E-03 |
| cg23898073 | <i>GFRA1</i>    | -4.550 | 106 | 56  | 7.08E-03 |
| cg22580353 | <i>PVR</i>      | 0.216  | 6   | 156 | 7.08E-03 |
| cg26025891 | <i>PSTPIP1</i>  | -0.449 | 101 | 61  | 7.08E-03 |
| cg26406994 | <i>RAP1GDS1</i> | -3.951 | 101 | 61  | 7.09E-03 |
| cg14176836 | <i>ITGAL</i>    | 0.130  | 50  | 112 | 7.09E-03 |
| cg20692181 | <i>RETN</i>     | 0.727  | 114 | 48  | 7.09E-03 |
| cg24956866 | <i>CALD1</i>    | -2.465 | 117 | 45  | 7.09E-03 |
| cg19716462 | <i>CCT4</i>     | -5.477 | 65  | 97  | 7.10E-03 |
| cg23796040 | <i>KIAA0143</i> | 2.176  | 134 | 28  | 7.10E-03 |
| cg00093177 | <i>FLJ43826</i> | 2.441  | 61  | 101 | 7.11E-03 |
| cg25753817 | <i>INPP1</i>    | -4.003 | 97  | 65  | 7.11E-03 |
| cg26555310 | <i>RPE65</i>    | 1.422  | 81  | 81  | 7.11E-03 |
| cg11061975 | <i>SIRPB2</i>   | 2.387  | 26  | 136 | 7.12E-03 |
| cg14989191 | <i>ASPHD1</i>   | -3.721 | 79  | 83  | 7.12E-03 |
| cg03503905 | <i>TAF4</i>     | -6.349 | 82  | 80  | 7.12E-03 |
| cg10694959 | <i>KPNA6</i>    | -5.399 | 132 | 30  | 7.12E-03 |
| cg04498032 | <i>CLK2</i>     | -4.081 | 32  | 130 | 7.12E-03 |
| cg10432620 | <i>FA2H</i>     | -4.122 | 68  | 94  | 7.12E-03 |
| cg01543654 | <i>PRAC</i>     | -2.819 | 87  | 75  | 7.13E-03 |
| cg08739282 | <i>DHX15</i>    | -2.759 | 70  | 92  | 7.13E-03 |
| cg22532997 | <i>LRRC16</i>   | -3.672 | 95  | 67  | 7.13E-03 |
| cg18769818 | <i>CENTD2</i>   | -3.562 | 59  | 103 | 7.13E-03 |
| cg04004861 | <i>STAU2</i>    | -3.992 | 55  | 107 | 7.14E-03 |
| cg00539955 | <i>PARVB</i>    | 1.312  | 99  | 63  | 7.15E-03 |
| cg16886259 | <i>CYSLTR2</i>  | 1.412  | 140 | 22  | 7.15E-03 |
| cg00062776 | <i>TULP2</i>    | 5.100  | 83  | 79  | 7.15E-03 |
| cg09173897 | <i>KIAA1622</i> | -0.882 | 32  | 130 | 7.15E-03 |
| cg13237829 | <i>GPSN2</i>    | -3.791 | 104 | 58  | 7.15E-03 |
| cg22975712 | <i>GALR3</i>    | 1.441  | 105 | 57  | 7.15E-03 |
| cg18704595 | <i>ADA</i>      | -4.050 | 32  | 130 | 7.15E-03 |
| cg15714041 | <i>ACO1</i>     | -5.582 | 140 | 22  | 7.16E-03 |
| cg20724073 | <i>MLX</i>      | -5.181 | 30  | 132 | 7.16E-03 |
| cg15309223 | <i>C1orf83</i>  | -5.034 | 94  | 68  | 7.16E-03 |
| cg07267296 | <i>HMBOX1</i>   | -3.943 | 66  | 96  | 7.17E-03 |
| cg14711016 | <i>NARFL</i>    | -4.191 | 86  | 76  | 7.17E-03 |
| cg18427589 | <i>MGC13024</i> | -5.211 | 95  | 67  | 7.17E-03 |
| cg18750407 | <i>RHEBL1</i>   | -4.931 | 130 | 32  | 7.17E-03 |
| cg20684549 | <i>PRG2</i>     | -0.177 | 95  | 67  | 7.17E-03 |
| cg06139836 | <i>EBF3</i>     | -3.509 | 64  | 98  | 7.18E-03 |
| cg03847636 | <i>GRPEL1</i>   | -3.689 | 41  | 121 | 7.19E-03 |
| cg24980583 | <i>SSBP1</i>    | -4.863 | 89  | 73  | 7.19E-03 |
| cg02900980 | <i>FOXP1</i>    | -5.923 | 77  | 85  | 7.20E-03 |
| cg15760840 | <i>HOXA11</i>   | -4.198 | 82  | 80  | 7.21E-03 |
| cg02633838 | <i>MRPS5</i>    | -3.375 | 57  | 105 | 7.21E-03 |

|            |                 |        |     |     |          |
|------------|-----------------|--------|-----|-----|----------|
| cg05732130 | <i>FLJ13912</i> | -5.032 | 93  | 69  | 7.22E-03 |
| cg19497444 | <i>SLC22A18</i> | 1.166  | 52  | 110 | 7.22E-03 |
| cg19756611 | <i>DACH1</i>    | -3.177 | 90  | 72  | 7.22E-03 |
| cg23915008 | <i>RPS16</i>    | -4.157 | 18  | 144 | 7.22E-03 |
| cg22724153 | <i>SPAM1</i>    | 1.507  | 29  | 133 | 7.22E-03 |
| cg24574111 | <i>EDG7</i>     | 2.581  | 23  | 139 | 7.23E-03 |
| cg07007400 | <i>KRT7</i>     | -3.247 | 49  | 113 | 7.23E-03 |
| cg19560210 | <i>PGBD5</i>    | 2.426  | 22  | 140 | 7.23E-03 |
| cg08424423 | <i>CDSN</i>     | 3.886  | 20  | 142 | 7.23E-03 |
| cg21820677 | <i>GABRA2</i>   | -4.512 | 54  | 108 | 7.23E-03 |
| cg16208491 | <i>PRPF4B</i>   | -2.523 | 116 | 46  | 7.23E-03 |
| cg20469837 | <i>GALNT5</i>   | -1.548 | 107 | 55  | 7.23E-03 |
| cg00899641 | <i>SF3B1</i>    | -4.803 | 39  | 123 | 7.24E-03 |
| cg19764555 | <i>AHNAK</i>    | -2.060 | 92  | 70  | 7.24E-03 |
| cg13796218 | <i>C1orf187</i> | -3.148 | 39  | 123 | 7.24E-03 |
| cg09238677 | <i>C3AR1</i>    | -1.065 | 112 | 50  | 7.24E-03 |
| cg24031606 | <i>CDC25A</i>   | -4.794 | 102 | 60  | 7.25E-03 |
| cg08258650 | <i>SLC1A2</i>   | -3.188 | 48  | 114 | 7.26E-03 |
| cg17127132 | <i>GGCX</i>     | -4.118 | 64  | 98  | 7.26E-03 |
| cg09813840 | <i>SELPLG</i>   | -0.434 | 43  | 119 | 7.26E-03 |
| cg19510604 | <i>CLK3</i>     | 2.093  | 128 | 34  | 7.27E-03 |
| cg17866455 | <i>SCAND2</i>   | 0.184  | 19  | 143 | 7.27E-03 |
| cg14792155 | <i>PLA2G4E</i>  | 3.006  | 86  | 76  | 7.27E-03 |
| cg18487515 | <i>ZNF342</i>   | -5.615 | 82  | 80  | 7.28E-03 |
| cg27250759 | <i>E2F3</i>     | -4.989 | 42  | 120 | 7.28E-03 |
| cg00116838 | <i>FLJ40125</i> | -3.441 | 32  | 130 | 7.29E-03 |
| cg06110728 | <i>NELL2</i>    | -4.060 | 57  | 105 | 7.29E-03 |
| cg18741962 | <i>TRIM23</i>   | -4.569 | 85  | 77  | 7.29E-03 |
| cg19744122 | <i>SYPL1</i>    | -5.293 | 32  | 130 | 7.29E-03 |
| cg26181372 | <i>ALDOB</i>    | 1.830  | 25  | 137 | 7.29E-03 |
| cg04132607 | <i>GATA5</i>    | 2.570  | 111 | 51  | 7.29E-03 |
| cg17703658 | <i>DDIT3</i>    | -5.268 | 61  | 101 | 7.29E-03 |
| cg11846956 | <i>KLK10</i>    | -2.567 | 24  | 138 | 7.31E-03 |
| cg07352586 | <i>KIAA1919</i> | -5.766 | 55  | 107 | 7.32E-03 |
| cg19037167 | <i>TLR2</i>     | -3.706 | 96  | 66  | 7.32E-03 |
| cg06018072 | <i>CLN6</i>     | -3.718 | 53  | 109 | 7.32E-03 |
| cg16317961 | <i>MAPRE2</i>   | -4.659 | 39  | 123 | 7.32E-03 |
| cg26986236 | <i>GPI</i>      | -2.501 | 53  | 109 | 7.32E-03 |
| cg22294577 | <i>SLC26A3</i>  | 2.180  | 84  | 78  | 7.33E-03 |
| cg05291178 | <i>C3orf24</i>  | 3.062  | 97  | 65  | 7.33E-03 |
| cg26568669 | <i>C6orf57</i>  | -4.908 | 45  | 117 | 7.33E-03 |
| cg19950767 | <i>TPTE2</i>    | 0.773  | 38  | 124 | 7.33E-03 |
| cg00000292 | <i>ATP2A1</i>   | 0.840  | 83  | 79  | 7.33E-03 |
| cg15824705 | <i>BCAR1</i>    | -4.984 | 33  | 129 | 7.33E-03 |
| cg17141902 | <i>NINJ1</i>    | 0.395  | 76  | 86  | 7.34E-03 |
| cg21660727 | <i>PCGF3</i>    | -2.717 | 25  | 137 | 7.35E-03 |
| cg26790059 | <i>MGC27121</i> | 2.889  | 59  | 103 | 7.35E-03 |
| cg24959428 | <i>GBP6</i>     | 0.854  | 50  | 112 | 7.35E-03 |
| cg19091474 | <i>NEO1</i>     | -4.984 | 28  | 134 | 7.35E-03 |
| cg26007077 | <i>SNAPC3</i>   | -5.542 | 102 | 60  | 7.35E-03 |
| cg09870606 | <i>GLG1</i>     | -3.511 | 31  | 131 | 7.36E-03 |
| cg07577263 | <i>NUP205</i>   | -4.035 | 115 | 47  | 7.37E-03 |
| cg13799206 | <i>ASRGL1</i>   | -5.347 | 43  | 119 | 7.37E-03 |
| cg23922081 | <i>SOX12</i>    | -4.242 | 90  | 72  | 7.38E-03 |
| cg07253191 | <i>PDHX</i>     | -1.831 | 61  | 101 | 7.38E-03 |

|            |                  |        |     |     |          |
|------------|------------------|--------|-----|-----|----------|
| cg15350194 | <i>FAM70B</i>    | -3.779 | 47  | 115 | 7.39E-03 |
| cg24262376 | <i>SCNM1</i>     | 0.916  | 47  | 115 | 7.39E-03 |
| cg02121427 | <i>LRRC15</i>    | 0.177  | 85  | 77  | 7.39E-03 |
| cg02548238 | <i>LOX</i>       | -4.248 | 95  | 67  | 7.39E-03 |
| cg15160742 | <i>C1orf121</i>  | -4.756 | 92  | 70  | 7.39E-03 |
| cg25781123 | <i>THUMPD3</i>   | -3.797 | 62  | 100 | 7.39E-03 |
| cg26402828 | <i>PCK2</i>      | -4.481 | 48  | 114 | 7.39E-03 |
| cg07612655 | <i>PTGIS</i>     | -0.559 | 82  | 80  | 7.39E-03 |
| cg14086122 | <i>MGC7036</i>   | -0.014 | 23  | 139 | 7.39E-03 |
| cg05944800 | <i>INSIG2</i>    | -4.165 | 63  | 99  | 7.39E-03 |
| cg04514469 | <i>C14orf49</i>  | 1.999  | 66  | 96  | 7.39E-03 |
| cg17022479 | <i>FAF1</i>      | -2.333 | 58  | 102 | 7.40E-03 |
| cg26229648 | <i>CNTF</i>      | 2.405  | 108 | 54  | 7.40E-03 |
| cg12788061 | <i>TIGD3</i>     | -5.358 | 120 | 42  | 7.41E-03 |
| cg26689483 | <i>QDPR</i>      | -3.869 | 80  | 82  | 7.41E-03 |
| cg03521600 | <i>MTBP</i>      | -4.356 | 91  | 71  | 7.41E-03 |
| cg16119274 | <i>MPHOSPH6</i>  | -4.166 | 59  | 103 | 7.41E-03 |
| cg02620013 | <i>MLNR</i>      | -2.149 | 135 | 27  | 7.42E-03 |
| cg22771603 | <i>HSPA4</i>     | -4.638 | 56  | 106 | 7.42E-03 |
| cg15699524 | <i>FGF18</i>     | 0.806  | 51  | 111 | 7.42E-03 |
| cg09237521 | <i>IFITM2</i>    | 3.945  | 72  | 90  | 7.42E-03 |
| cg15233681 | <i>IL1R1</i>     | 1.767  | 78  | 84  | 7.43E-03 |
| cg13958304 | <i>RSBN1</i>     | -5.113 | 50  | 112 | 7.43E-03 |
| cg14372394 | <i>CHST10</i>    | -3.979 | 113 | 49  | 7.43E-03 |
| cg05774801 | <i>SFRP2</i>     | -3.185 | 21  | 141 | 7.44E-03 |
| cg23953133 | <i>LMNB1</i>     | -4.413 | 53  | 109 | 7.44E-03 |
| cg06804431 | <i>PEX11B</i>    | -5.386 | 111 | 51  | 7.44E-03 |
| cg23858565 | <i>CTCF</i>      | -4.736 | 88  | 74  | 7.44E-03 |
| cg06565684 | <i>EXTL2</i>     | -3.701 | 70  | 92  | 7.44E-03 |
| cg24107142 | <i>HK2</i>       | 1.635  | 49  | 113 | 7.44E-03 |
| cg15579370 | <i>SMOX</i>      | -4.015 | 88  | 74  | 7.45E-03 |
| cg23696712 | <i>KRT6L</i>     | 1.593  | 109 | 53  | 7.45E-03 |
| cg06806080 | <i>CD47</i>      | 2.648  | 62  | 100 | 7.45E-03 |
| cg01274324 | <i>C21orf77</i>  | 3.645  | 68  | 94  | 7.45E-03 |
| cg27416437 | <i>EWSR1</i>     | -5.848 | 86  | 76  | 7.45E-03 |
| cg11595245 | <i>HELLS</i>     | -5.337 | 102 | 60  | 7.46E-03 |
| cg03086563 | <i>HIST2H2AC</i> | -4.513 | 128 | 34  | 7.46E-03 |
| cg18347238 | <i>VPS4A</i>     | -4.669 | 68  | 94  | 7.46E-03 |
| cg07482936 | <i>LOC388407</i> | -3.519 | 76  | 86  | 7.46E-03 |
| cg10184886 | <i>PLA2G6</i>    | -3.018 | 93  | 68  | 7.47E-03 |
| cg00143998 | <i>HIST3H2BB</i> | -4.363 | 103 | 59  | 7.47E-03 |
| cg19254558 | <i>PSARL</i>     | -4.058 | 52  | 110 | 7.48E-03 |
| cg14633704 | <i>HSD17B3</i>   | 2.378  | 50  | 112 | 7.48E-03 |
| cg17675882 | <i>NDRG3</i>     | -3.467 | 60  | 102 | 7.48E-03 |
| cg21608192 | <i>XYLT1</i>     | -3.973 | 77  | 85  | 7.48E-03 |
| cg00149976 | <i>MGLL</i>      | -4.872 | 63  | 99  | 7.49E-03 |
| cg06196379 | <i>TREM1</i>     | -0.942 | 81  | 81  | 7.49E-03 |
| cg17425224 | <i>PARK7</i>     | -3.215 | 60  | 101 | 7.49E-03 |
| cg21713257 | <i>ETFDH</i>     | -5.437 | 21  | 141 | 7.49E-03 |
| cg26718122 | <i>SFRS6</i>     | -1.024 | 38  | 124 | 7.49E-03 |
| cg11303670 | <i>TSPAN33</i>   | -3.636 | 65  | 97  | 7.50E-03 |
| cg09472203 | <i>AP3B2</i>     | -4.600 | 55  | 107 | 7.50E-03 |
| cg25799433 | <i>SIRPB1</i>    | -1.237 | 98  | 64  | 7.50E-03 |
| cg23696618 | <i>SERPINB10</i> | 0.390  | 123 | 39  | 7.51E-03 |
| cg25836159 | <i>AGGF1</i>     | -5.239 | 71  | 91  | 7.51E-03 |

|            |              |        |     |     |          |
|------------|--------------|--------|-----|-----|----------|
| cg16181202 | CTSO         | -3.485 | 95  | 67  | 7.51E-03 |
| cg12888113 | MASP2        | 5.029  | 33  | 129 | 7.52E-03 |
| cg10484485 | KIAA0922     | -5.480 | 71  | 91  | 7.52E-03 |
| cg16175263 | TNFRSF10C    | -1.691 | 21  | 141 | 7.53E-03 |
| cg09205751 | NALP6        | 1.249  | 76  | 86  | 7.53E-03 |
| cg22064129 | SLC14A2      | 2.309  | 15  | 147 | 7.53E-03 |
| cg14971781 | ACBD3        | -3.862 | 74  | 88  | 7.53E-03 |
| cg11905589 | PAIP2        | -3.047 | 81  | 81  | 7.54E-03 |
| cg17475918 | HLA-E        | -3.108 | 67  | 95  | 7.54E-03 |
| cg08009328 | HIST1H2BF    | -2.165 | 85  | 70  | 7.54E-03 |
| cg19014419 | ZNF300       | -1.343 | 23  | 139 | 7.54E-03 |
| cg08881519 | KFZP586D0919 | -4.117 | 74  | 88  | 7.55E-03 |
| cg02413850 | SLC35C2      | -5.203 | 56  | 106 | 7.55E-03 |
| cg15863254 | ACBD3        | -3.979 | 82  | 80  | 7.55E-03 |
| cg11395610 | RAB28        | -4.204 | 54  | 108 | 7.55E-03 |
| cg19630689 | SERPINA12    | -2.295 | 86  | 76  | 7.55E-03 |
| cg22533573 | WT1          | -2.313 | 83  | 79  | 7.56E-03 |
| cg13625205 | SNX27        | -5.785 | 60  | 102 | 7.56E-03 |
| cg08620470 | SLC25A16     | 3.475  | 37  | 125 | 7.57E-03 |
| cg22029275 | FLJ25477     | -4.035 | 120 | 42  | 7.58E-03 |
| cg17132967 | ZNF83        | -1.460 | 73  | 89  | 7.58E-03 |
| cg02321871 | RCBTB1       | -4.154 | 90  | 72  | 7.58E-03 |
| cg03860466 | PRDX2        | -5.272 | 87  | 75  | 7.59E-03 |
| cg19855618 | ZNF623       | 2.920  | 81  | 81  | 7.59E-03 |
| cg08914916 | MRPS12       | -6.459 | 113 | 49  | 7.59E-03 |
| cg03426225 | FAM38B       | 3.769  | 95  | 67  | 7.59E-03 |
| cg25685640 | E2F8         | -4.077 | 67  | 95  | 7.60E-03 |
| cg21710060 | GRK1         | 3.802  | 39  | 123 | 7.60E-03 |
| cg03611555 | SLC25A21     | -4.504 | 81  | 81  | 7.60E-03 |
| cg05937453 | SFRP5        | -4.983 | 79  | 83  | 7.60E-03 |
| cg15264255 | NPAL2        | -2.678 | 88  | 74  | 7.60E-03 |
| cg05976325 | LOC284912    | 3.511  | 51  | 111 | 7.61E-03 |
| cg21497439 | HAPLN4       | 1.153  | 124 | 38  | 7.61E-03 |
| cg01785568 | MSX1         | 0.374  | 93  | 69  | 7.61E-03 |
| cg26255848 | FBL          | -2.502 | 65  | 92  | 7.61E-03 |
| cg19695867 | WDR47        | -2.456 | 70  | 92  | 7.61E-03 |
| cg16127900 | GPRC6A       | -1.290 | 90  | 68  | 7.62E-03 |
| cg03054162 | PCYOX1       | -4.229 | 79  | 83  | 7.62E-03 |
| cg26195577 | C20orf3      | -4.210 | 60  | 102 | 7.62E-03 |
| cg07786760 | DCHS2        | -4.501 | 39  | 123 | 7.62E-03 |
| cg15210427 | CST9L        | 0.269  | 83  | 79  | 7.62E-03 |
| cg20367072 | ETFB         | -5.602 | 98  | 64  | 7.62E-03 |
| cg04797496 | PCDH12       | 1.816  | 34  | 128 | 7.63E-03 |
| cg04517429 | DCHS2        | -2.443 | 92  | 70  | 7.63E-03 |
| cg00943245 | PCDHGC5      | 1.611  | 122 | 40  | 7.63E-03 |
| cg26635603 | BACH1        | -4.087 | 98  | 64  | 7.63E-03 |
| cg12513481 | SCAP1        | -0.286 | 56  | 106 | 7.64E-03 |
| cg19777470 | CRABP1       | -3.649 | 45  | 117 | 7.64E-03 |
| cg05721199 | SAMD7        | 1.200  | 99  | 44  | 7.64E-03 |
| cg02034222 | DQX1         | 2.329  | 87  | 75  | 7.64E-03 |
| cg10823157 | ATP9B        | -4.436 | 57  | 105 | 7.64E-03 |
| cg15512851 | FGD2         | 1.205  | 40  | 122 | 7.64E-03 |
| cg23476955 | AP1M1        | -4.895 | 57  | 105 | 7.64E-03 |
| cg11312566 | SLC2A8       | -5.208 | 76  | 86  | 7.65E-03 |
| cg22853986 | TRMT12       | -4.183 | 132 | 30  | 7.65E-03 |

|            |                  |        |     |     |          |
|------------|------------------|--------|-----|-----|----------|
| cg13325529 | <i>TMEM107</i>   | -4.386 | 81  | 81  | 7.65E-03 |
| cg08526867 | <i>COX7C</i>     | -4.994 | 37  | 125 | 7.65E-03 |
| cg22555495 | <i>SNRPN</i>     | 0.269  | 102 | 60  | 7.65E-03 |
| cg23045073 | <i>NPHS2</i>     | -3.117 | 98  | 64  | 7.65E-03 |
| cg01347719 | <i>DQX1</i>      | 4.856  | 55  | 107 | 7.66E-03 |
| cg18488855 | <i>NOVA1</i>     | -3.836 | 50  | 112 | 7.66E-03 |
| cg04786857 | <i>SPDY1</i>     | -4.135 | 144 | 18  | 7.66E-03 |
| cg06290168 | <i>C12orf24</i>  | -4.795 | 108 | 54  | 7.66E-03 |
| cg20893022 | <i>C19orf30</i>  | -1.648 | 78  | 84  | 7.66E-03 |
| cg25739003 | <i>EEF1G</i>     | -4.195 | 60  | 102 | 7.66E-03 |
| cg20377677 | <i>ZNF496</i>    | -3.780 | 65  | 97  | 7.68E-03 |
| cg22876908 | <i>DGKA</i>      | -0.845 | 48  | 114 | 7.68E-03 |
| cg22920538 | <i>UROD</i>      | -5.026 | 117 | 45  | 7.68E-03 |
| cg06762858 | <i>PILRA</i>     | 1.923  | 72  | 90  | 7.68E-03 |
| cg27611781 | <i>PDXP</i>      | -2.488 | 39  | 123 | 7.68E-03 |
| cg16434546 | <i>SDCCAG10</i>  | -3.583 | 44  | 118 | 7.70E-03 |
| cg01369981 | <i>CAMKK2</i>    | -4.103 | 81  | 81  | 7.70E-03 |
| cg02631622 | <i>SIAH1</i>     | -4.942 | 51  | 111 | 7.70E-03 |
| cg12737574 | <i>PDIA3</i>     | -3.415 | 113 | 49  | 7.70E-03 |
| cg16983159 | <i>LOC340061</i> | -4.056 | 87  | 75  | 7.71E-03 |
| cg13694749 | <i>SCN4A</i>     | 2.098  | 56  | 106 | 7.72E-03 |
| cg19161333 | <i>EIF3S12</i>   | -4.355 | 98  | 64  | 7.72E-03 |
| cg18135555 | <i>PIWL2</i>     | 1.793  | 142 | 20  | 7.72E-03 |
| cg25514503 | <i>PER3</i>      | 2.799  | 90  | 72  | 7.73E-03 |
| cg13636404 | <i>ZNF655</i>    | -5.628 | 76  | 86  | 7.73E-03 |
| cg13120519 | <i>ALKBH7</i>    | -4.195 | 64  | 98  | 7.73E-03 |
| cg25438415 | <i>ZNF426</i>    | -3.834 | 41  | 121 | 7.73E-03 |
| cg14353162 | <i>TMEM55B</i>   | -4.889 | 109 | 53  | 7.74E-03 |
| cg15945754 | <i>C6orf204</i>  | 2.383  | 138 | 24  | 7.74E-03 |
| cg19051578 | <i>DEPDC1B</i>   | -4.913 | 31  | 131 | 7.74E-03 |
| cg04712018 | <i>ATG16L1</i>   | -3.819 | 78  | 84  | 7.74E-03 |
| cg02784848 | <i>FLJ22688</i>  | -3.795 | 85  | 77  | 7.75E-03 |
| cg15479752 | <i>FFAR2</i>     | 3.409  | 35  | 127 | 7.75E-03 |
| cg09322949 | <i>TRFP</i>      | -2.962 | 84  | 77  | 7.76E-03 |
| cg12112929 | <i>GPR3</i>      | -4.148 | 95  | 67  | 7.76E-03 |
| cg22411068 | <i>ROPN1L</i>    | -4.930 | 54  | 108 | 7.76E-03 |
| cg02178774 | <i>MEF2B</i>     | -4.360 | 60  | 102 | 7.76E-03 |
| cg15663121 | <i>N-PAC</i>     | -5.004 | 46  | 116 | 7.76E-03 |
| cg08665772 | <i>KCNJ9</i>     | -1.508 | 96  | 66  | 7.76E-03 |
| cg13140740 | <i>ARL4</i>      | -2.085 | 73  | 89  | 7.76E-03 |
| cg06992027 | <i>TAGLN2</i>    | -4.804 | 53  | 109 | 7.76E-03 |
| cg24937706 | <i>RB1</i>       | -5.316 | 68  | 94  | 7.76E-03 |
| cg01637734 | <i>CD5L</i>      | 1.664  | 117 | 45  | 7.77E-03 |
| cg04684516 | <i>SNCAIP</i>    | -3.507 | 90  | 72  | 7.77E-03 |
| cg24516901 | <i>FLJ22746</i>  | -2.206 | 117 | 45  | 7.77E-03 |
| cg24346637 | <i>UBL4B</i>     | 1.072  | 45  | 117 | 7.78E-03 |
| cg03521113 | <i>LRMP</i>      | -1.977 | 71  | 91  | 7.78E-03 |
| cg11884792 | <i>OBFC2A</i>    | -4.942 | 56  | 106 | 7.78E-03 |
| cg24552358 | <i>ORM1</i>      | 1.516  | 131 | 31  | 7.78E-03 |
| cg04893087 | <i>PPARGC1A</i>  | -3.721 | 50  | 112 | 7.78E-03 |
| cg20639263 | <i>NP</i>        | -5.217 | 104 | 58  | 7.79E-03 |
| cg03064400 | <i>U2AF1L3</i>   | -4.308 | 56  | 106 | 7.79E-03 |
| cg16268051 | <i>CDC42</i>     | -5.367 | 109 | 53  | 7.80E-03 |
| cg16166399 | <i>ZNF499</i>    | -3.954 | 66  | 96  | 7.81E-03 |
| cg07732644 | <i>ASPA</i>      | 0.764  | 109 | 53  | 7.82E-03 |

|            |                 |        |     |     |          |
|------------|-----------------|--------|-----|-----|----------|
| cg13492340 | <i>ITGA8</i>    | -3.494 | 52  | 110 | 7.82E-03 |
| cg10036895 | <i>MGMT</i>     | 2.555  | 80  | 82  | 7.82E-03 |
| cg10865119 | <i>C6orf208</i> | -3.783 | 91  | 71  | 7.82E-03 |
| cg07177852 | <i>CCDC68</i>   | -4.284 | 63  | 99  | 7.82E-03 |
| cg05294455 | <i>MYL4</i>     | 2.259  | 97  | 65  | 7.83E-03 |
| cg25010118 | <i>C18orf4</i>  | -3.720 | 69  | 93  | 7.83E-03 |
| cg08557686 | <i>RTN4R</i>    | -3.550 | 77  | 85  | 7.83E-03 |
| cg16396417 | <i>ZNF42</i>    | -2.907 | 51  | 111 | 7.83E-03 |
| cg17385448 | <i>AGMAT</i>    | -0.604 | 90  | 72  | 7.83E-03 |
| cg23964386 | <i>LTB4DH</i>   | -2.780 | 81  | 81  | 7.83E-03 |
| cg02131399 | <i>LRP1</i>     | -4.639 | 45  | 117 | 7.83E-03 |
| cg21262854 | <i>FLJ20097</i> | -5.170 | 40  | 122 | 7.84E-03 |
| cg07900766 | <i>SPAG16</i>   | -5.393 | 74  | 88  | 7.84E-03 |
| cg25506900 | <i>TSEN54</i>   | -5.127 | 75  | 87  | 7.84E-03 |
| cg05995267 | <i>PRRT2</i>    | -3.462 | 46  | 116 | 7.84E-03 |
| cg10059104 | <i>FLJ36046</i> | 4.436  | 86  | 76  | 7.84E-03 |
| cg01522194 | <i>KHK</i>      | -3.745 | 73  | 89  | 7.84E-03 |
| cg11115427 | <i>PHYH</i>     | -2.564 | 64  | 98  | 7.85E-03 |
| cg03569412 | <i>MBD3</i>     | 0.518  | 37  | 125 | 7.85E-03 |
| cg21443584 | <i>MBIP</i>     | -4.898 | 60  | 102 | 7.85E-03 |
| cg09191327 | <i>PRDM12</i>   | -4.892 | 63  | 99  | 7.86E-03 |
| cg11368578 | <i>CDK5</i>     | -4.212 | 71  | 91  | 7.86E-03 |
| cg04737046 | <i>ABCB4</i>    | 1.249  | 58  | 104 | 7.87E-03 |
| cg05135288 | <i>RHOT2</i>    | -0.046 | 76  | 86  | 7.87E-03 |
| cg14343107 | <i>BUB1B</i>    | -5.031 | 100 | 62  | 7.87E-03 |
| cg23922454 | <i>LHX5</i>     | -4.054 | 97  | 65  | 7.88E-03 |
| cg09539271 | <i>PTHB1</i>    | -6.195 | 86  | 76  | 7.88E-03 |
| cg01535453 | <i>ACADS</i>    | -4.647 | 69  | 93  | 7.89E-03 |
| cg06621126 | <i>HSF4</i>     | -4.498 | 78  | 84  | 7.90E-03 |
| cg10766289 | <i>KRT1</i>     | 1.987  | 75  | 87  | 7.90E-03 |
| cg14370448 | <i>TBX6</i>     | -3.145 | 69  | 93  | 7.90E-03 |
| cg20855344 | <i>NR1D2</i>    | -2.539 | 94  | 68  | 7.90E-03 |
| cg08509737 | <i>ATG7</i>     | 3.441  | 27  | 135 | 7.90E-03 |
| cg22614355 | <i>HTR6</i>     | -5.409 | 82  | 80  | 7.91E-03 |
| cg08398233 | <i>CAMK2N1</i>  | -2.135 | 68  | 94  | 7.92E-03 |
| cg11391732 | <i>HSPB3</i>    | 0.717  | 99  | 63  | 7.92E-03 |
| cg15746719 | <i>DAPK1</i>    | -4.130 | 109 | 53  | 7.92E-03 |
| cg22510822 | <i>OR1E2</i>    | 1.738  | 74  | 88  | 7.92E-03 |
| cg15818800 | <i>DNAJC1</i>   | -6.017 | 54  | 108 | 7.92E-03 |
| cg12820481 | <i>NEK2</i>     | -3.983 | 70  | 92  | 7.92E-03 |
| cg00804392 | <i>RHOH</i>     | -0.968 | 86  | 76  | 7.92E-03 |
| cg04702490 | <i>GALNT2</i>   | -4.341 | 63  | 99  | 7.92E-03 |
| cg02717866 | <i>FLJ32771</i> | 1.256  | 133 | 29  | 7.92E-03 |
| cg08840010 | <i>TNFRSF9</i>  | -0.123 | 87  | 75  | 7.93E-03 |
| cg24176037 | <i>TBPL1</i>    | -3.520 | 72  | 90  | 7.93E-03 |
| cg25242557 | <i>PAX6</i>     | -2.238 | 90  | 72  | 7.93E-03 |
| cg21607066 | <i>PHIP</i>     | -4.930 | 85  | 77  | 7.93E-03 |
| cg16484842 | <i>TH1L</i>     | -4.611 | 82  | 80  | 7.93E-03 |
| cg17403875 | <i>LGALS3</i>   | -6.155 | 101 | 61  | 7.93E-03 |
| cg22282672 | <i>FLJ32921</i> | -2.714 | 91  | 71  | 7.94E-03 |
| cg22407504 | <i>MUC5B</i>    | 1.670  | 46  | 116 | 7.94E-03 |
| cg15062795 | <i>ETV6</i>     | -4.470 | 78  | 84  | 7.94E-03 |
| cg13323474 | <i>TTC18</i>    | -4.096 | 40  | 122 | 7.95E-03 |
| cg11399891 | <i>ZNF444</i>   | -4.041 | 71  | 91  | 7.95E-03 |
| cg19188612 | <i>CTHRC1</i>   | 1.514  | 98  | 64  | 7.95E-03 |

|            |                 |        |     |     |          |
|------------|-----------------|--------|-----|-----|----------|
| cg15307268 | <i>GPR176</i>   | -3.691 | 54  | 108 | 7.96E-03 |
| cg17849956 | <i>ZNF304</i>   | -5.248 | 44  | 118 | 7.96E-03 |
| cg21743830 | <i>CCL25</i>    | 1.152  | 83  | 79  | 7.96E-03 |
| cg01127428 | <i>SYCP3</i>    | 3.980  | 59  | 103 | 7.96E-03 |
| cg04740359 | <i>NTF3</i>     | 0.622  | 59  | 103 | 7.96E-03 |
| cg01241375 | <i>INVS</i>     | -3.134 | 60  | 102 | 7.96E-03 |
| cg00908551 | <i>FANCF</i>    | -3.682 | 114 | 48  | 7.97E-03 |
| cg05028306 | <i>LAP3</i>     | -2.599 | 100 | 62  | 7.97E-03 |
| cg17794261 | <i>ZNF688</i>   | -4.878 | 60  | 102 | 7.97E-03 |
| cg15792688 | <i>FLJ90036</i> | -4.624 | 82  | 80  | 7.98E-03 |
| cg17072268 | <i>PLD3</i>     | 1.068  | 84  | 78  | 7.98E-03 |
| cg20637307 | <i>ERBB4</i>    | -4.539 | 102 | 60  | 7.98E-03 |
| cg24414089 | <i>MRC2</i>     | -4.737 | 106 | 56  | 7.98E-03 |
| cg15694180 | <i>ADAM15</i>   | -6.025 | 109 | 53  | 7.98E-03 |
| cg05471297 | <i>RYR1</i>     | -4.280 | 105 | 57  | 7.99E-03 |
| cg07284558 | <i>STK32C</i>   | -2.722 | 99  | 63  | 7.99E-03 |
| cg00754253 | <i>HRASLS5</i>  | -0.911 | 130 | 32  | 7.99E-03 |
| cg01991150 | <i>CHRM4</i>    | 2.958  | 112 | 50  | 7.99E-03 |
| cg19451391 | <i>ZNF512</i>   | -3.998 | 103 | 59  | 7.99E-03 |
| cg08261841 | <i>FLJ90586</i> | 1.738  | 29  | 133 | 8.00E-03 |
| cg04612566 | <i>C8orf31</i>  | -0.638 | 78  | 84  | 8.00E-03 |
| cg04070847 | <i>CD200R1</i>  | -1.534 | 64  | 98  | 8.01E-03 |
| cg25466368 | <i>HES1</i>     | -4.241 | 104 | 58  | 8.01E-03 |
| cg08450168 | <i>RAB42</i>    | 3.018  | 35  | 127 | 8.01E-03 |
| cg14860494 | <i>GCLM</i>     | -3.437 | 65  | 97  | 8.02E-03 |
| cg01447498 | <i>TSNAX</i>    | -3.605 | 58  | 104 | 8.02E-03 |
| cg01656853 | <i>FUT2</i>     | -0.398 | 100 | 62  | 8.02E-03 |
| cg05429895 | <i>TLR4</i>     | -1.591 | 103 | 59  | 8.02E-03 |
| cg16879596 | <i>CYP3A5</i>   | 1.644  | 56  | 106 | 8.02E-03 |
| cg14820573 | <i>C16orf33</i> | 3.019  | 76  | 86  | 8.03E-03 |
| cg07561588 | <i>RNF139</i>   | -5.100 | 53  | 109 | 8.03E-03 |
| cg18396533 | <i>DYDC1</i>    | -1.129 | 32  | 130 | 8.04E-03 |
| cg03750606 | <i>ESRRG</i>    | -3.560 | 63  | 99  | 8.04E-03 |
| cg25598083 | <i>ACOT2</i>    | 0.466  | 80  | 82  | 8.04E-03 |
| cg09458237 | <i>HSPA12B</i>  | 1.874  | 39  | 123 | 8.05E-03 |
| cg27653134 | <i>A2ML1</i>    | 1.340  | 49  | 113 | 8.05E-03 |
| cg21824213 | <i>CASC5</i>    | -5.241 | 103 | 59  | 8.06E-03 |
| cg11354906 | <i>SFRP2</i>    | -3.525 | 117 | 45  | 8.06E-03 |
| cg01500421 | <i>HARSL</i>    | -4.738 | 94  | 68  | 8.06E-03 |
| cg27345946 | <i>TADA3L</i>   | -0.955 | 128 | 34  | 8.06E-03 |
| cg07196761 | <i>WDR71</i>    | 2.743  | 59  | 103 | 8.06E-03 |
| cg15870225 | <i>RNF41</i>    | 3.016  | 50  | 112 | 8.06E-03 |
| cg19177941 | <i>ALDH1A3</i>  | -1.477 | 85  | 77  | 8.07E-03 |
| cg03532879 | <i>SMAF1</i>    | 2.208  | 95  | 67  | 8.07E-03 |
| cg08652404 | <i>ZNF394</i>   | -4.783 | 85  | 77  | 8.07E-03 |
| cg09607282 | <i>RTN2</i>     | -2.274 | 38  | 124 | 8.07E-03 |
| cg23639989 | <i>FAM105A</i>  | -3.485 | 31  | 131 | 8.09E-03 |
| cg00815583 | <i>FBXO16</i>   | -3.682 | 123 | 39  | 8.09E-03 |
| cg24216294 | <i>ZNF623</i>   | 3.293  | 91  | 71  | 8.09E-03 |
| cg14099017 | <i>MAP2K4</i>   | -4.192 | 63  | 99  | 8.10E-03 |
| cg24206694 | <i>JMJD5</i>    | -5.651 | 98  | 64  | 8.10E-03 |
| cg21439450 | <i>POLR2C</i>   | -6.044 | 104 | 58  | 8.10E-03 |
| cg04111761 | <i>CCR3</i>     | 0.285  | 55  | 107 | 8.10E-03 |
| cg05146762 | <i>GTF2IRD1</i> | -3.984 | 80  | 82  | 8.10E-03 |
| cg03530967 | <i>ITGAV</i>    | -3.768 | 84  | 78  | 8.10E-03 |

|            |                  |        |     |     |          |
|------------|------------------|--------|-----|-----|----------|
| cg05484458 | <i>GNB3</i>      | 1.496  | 58  | 104 | 8.11E-03 |
| cg09640202 | <i>IMP4</i>      | 1.834  | 104 | 58  | 8.11E-03 |
| cg10728503 | <i>MKS1</i>      | 1.622  | 115 | 47  | 8.11E-03 |
| cg11744351 | <i>UBL3</i>      | -6.081 | 89  | 73  | 8.12E-03 |
| cg14135551 | <i>DAAM2</i>     | -4.643 | 59  | 103 | 8.12E-03 |
| cg23328404 | <i>ChGn</i>      | -1.906 | 122 | 39  | 8.12E-03 |
| cg18552939 | <i>NDN</i>       | -1.161 | 61  | 101 | 8.13E-03 |
| cg00462994 | <i>NAGS</i>      | -3.062 | 53  | 109 | 8.13E-03 |
| cg19240938 | <i>SLC22A18</i>  | 3.070  | 55  | 107 | 8.14E-03 |
| cg07588113 | <i>FLJ21062</i>  | -5.277 | 82  | 80  | 8.14E-03 |
| cg08715135 | <i>TRIB1</i>     | -4.869 | 64  | 98  | 8.14E-03 |
| cg20822628 | <i>GATA5</i>     | 4.470  | 62  | 100 | 8.14E-03 |
| cg09253125 | <i>IQCD</i>      | -5.692 | 76  | 86  | 8.15E-03 |
| cg15824080 | <i>TAF15</i>     | -3.926 | 90  | 72  | 8.16E-03 |
| cg05270634 | <i>RND2</i>      | -3.363 | 52  | 110 | 8.16E-03 |
| cg23324259 | <i>SNX16</i>     | -4.577 | 31  | 131 | 8.16E-03 |
| cg02932669 | <i>VGCNL1</i>    | -2.511 | 106 | 56  | 8.17E-03 |
| cg06534422 | <i>MIF</i>       | -5.108 | 88  | 74  | 8.17E-03 |
| cg24016044 | <i>CPEB4</i>     | -4.501 | 56  | 106 | 8.18E-03 |
| cg24041995 | <i>LIG3</i>      | -4.583 | 88  | 74  | 8.18E-03 |
| cg23674882 | <i>LOXL3</i>     | 0.258  | 71  | 91  | 8.18E-03 |
| cg04564646 | <i>MOV10</i>     | -6.329 | 82  | 80  | 8.18E-03 |
| cg02027010 | <i>ALAD</i>      | -4.899 | 52  | 110 | 8.19E-03 |
| cg09527362 | <i>C6orf150</i>  | -4.222 | 110 | 52  | 8.20E-03 |
| cg25050026 | <i>MFSD1</i>     | -2.442 | 80  | 82  | 8.20E-03 |
| cg17525406 | <i>AJAP1</i>     | -3.399 | 88  | 74  | 8.20E-03 |
| cg06235429 | <i>NDUFV1</i>    | 1.860  | 108 | 54  | 8.22E-03 |
| cg22783363 | <i>TNFRSF10D</i> | -3.447 | 55  | 107 | 8.24E-03 |
| cg08149333 | <i>SLC25A24</i>  | -6.097 | 55  | 107 | 8.25E-03 |
| cg14204735 | <i>CYB561</i>    | -3.231 | 23  | 139 | 8.25E-03 |
| cg04084157 | <i>VGf</i>       | -2.192 | 72  | 90  | 8.26E-03 |
| cg13547237 | <i>Bles03</i>    | -1.599 | 88  | 74  | 8.26E-03 |
| cg07126559 | <i>SGCG</i>      | 0.815  | 61  | 101 | 8.27E-03 |
| cg08876932 | <i>PHOX2A</i>    | -2.700 | 4   | 158 | 8.27E-03 |
| cg02131853 | <i>FLJ23235</i>  | -0.097 | 91  | 71  | 8.28E-03 |
| cg12994003 | <i>LBR</i>       | -4.676 | 67  | 95  | 8.28E-03 |
| cg03317245 | <i>P2RX5</i>     | 0.832  | 69  | 93  | 8.28E-03 |
| cg20047732 | <i>TTC14</i>     | -4.698 | 41  | 121 | 8.28E-03 |
| cg02883161 | <i>MSI1</i>      | -3.375 | 121 | 41  | 8.28E-03 |
| cg24053587 | <i>PTPRO</i>     | -4.899 | 101 | 61  | 8.28E-03 |
| cg19751300 | <i>ST8SIA5</i>   | -3.366 | 87  | 75  | 8.28E-03 |
| cg21743569 | <i>NR1H2</i>     | -5.341 | 100 | 62  | 8.28E-03 |
| cg24784109 | <i>HIST1H3D</i>  | -2.489 | 32  | 130 | 8.29E-03 |
| cg14366490 | <i>TXNL6</i>     | 0.846  | 54  | 108 | 8.29E-03 |
| cg17353431 | <i>THAP7</i>     | -4.709 | 98  | 64  | 8.29E-03 |
| cg15727249 | <i>APOA4</i>     | 0.413  | 140 | 22  | 8.29E-03 |
| cg24117468 | <i>P4HA2</i>     | -0.899 | 120 | 42  | 8.29E-03 |
| cg25148589 | <i>GRIA2</i>     | -1.106 | 40  | 122 | 8.29E-03 |
| cg25007250 | <i>NOS3</i>      | 3.622  | 69  | 93  | 8.29E-03 |
| cg12850636 | <i>TJP3</i>      | 1.734  | 127 | 35  | 8.30E-03 |
| cg12045002 | <i>DPYSL5</i>    | -3.994 | 102 | 60  | 8.30E-03 |
| cg22370370 | <i>ZNF652</i>    | -5.919 | 122 | 40  | 8.30E-03 |
| cg26486663 | <i>SYNGR3</i>    | -3.700 | 44  | 118 | 8.30E-03 |
| cg02096633 | <i>UNC13B</i>    | -4.330 | 100 | 62  | 8.30E-03 |
| cg19191401 | <i>SRGAP1</i>    | -4.445 | 115 | 47  | 8.30E-03 |

|            |                 |        |     |     |          |
|------------|-----------------|--------|-----|-----|----------|
| cg22728790 | <i>PIN1</i>     | -4.705 | 83  | 79  | 8.30E-03 |
| cg04026012 | <i>SYNCRIP</i>  | -3.438 | 112 | 50  | 8.32E-03 |
| cg25903375 | <i>SET7</i>     | -4.881 | 32  | 130 | 8.32E-03 |
| cg05766474 | <i>CCL16</i>    | 3.333  | 43  | 119 | 8.33E-03 |
| cg06731484 | <i>IVD</i>      | -4.796 | 69  | 93  | 8.33E-03 |
| cg08876665 | <i>LTB4DH</i>   | -4.585 | 57  | 105 | 8.33E-03 |
| cg20672744 | <i>ERICH1</i>   | -6.283 | 62  | 100 | 8.33E-03 |
| cg24621042 | <i>SERPINA1</i> | 0.079  | 32  | 130 | 8.33E-03 |
| cg09033997 | <i>CCR9</i>     | 3.316  | 79  | 83  | 8.33E-03 |
| cg14375111 | <i>TMEM43</i>   | 2.371  | 16  | 146 | 8.33E-03 |
| cg08831744 | <i>IGFBP3</i>   | -3.529 | 92  | 70  | 8.34E-03 |
| cg02331561 | <i>ABCA3</i>    | -3.803 | 101 | 61  | 8.34E-03 |
| cg09594067 | <i>EXOSC6</i>   | -5.339 | 86  | 76  | 8.34E-03 |
| cg24983959 | <i>RTN4RL2</i>  | -3.438 | 43  | 119 | 8.34E-03 |
| cg22637834 | <i>AKT3</i>     | 2.975  | 58  | 104 | 8.34E-03 |
| cg05306006 | <i>RPE</i>      | -5.379 | 95  | 67  | 8.35E-03 |
| cg25848060 | <i>SLBP</i>     | -4.970 | 117 | 45  | 8.35E-03 |
| cg24183484 | <i>GGN</i>      | -4.466 | 99  | 63  | 8.36E-03 |
| cg05045781 | <i>FHL3</i>     | -4.566 | 88  | 74  | 8.38E-03 |
| cg08701609 | <i>DONSON</i>   | -4.755 | 75  | 87  | 8.38E-03 |
| cg18442986 | <i>TTL</i>      | -3.738 | 46  | 116 | 8.38E-03 |
| cg01360768 | <i>TSG101</i>   | -5.071 | 59  | 103 | 8.39E-03 |
| cg16878021 |                 | 4.004  | 140 | 22  | 8.39E-03 |
| cg17063929 | <i>NOX4</i>     | -2.079 | 73  | 89  | 8.39E-03 |
| cg22319470 | <i>HDAC11</i>   | -5.757 | 81  | 81  | 8.39E-03 |
| cg03458191 | <i>SAA1</i>     | 1.880  | 113 | 49  | 8.40E-03 |
| cg25040783 | <i>APPL</i>     | -3.395 | 56  | 106 | 8.40E-03 |
| cg26608199 | <i>F10</i>      | 2.487  | 41  | 121 | 8.40E-03 |
| cg20633621 | <i>GAS2L1</i>   | -5.048 | 50  | 112 | 8.40E-03 |
| cg00410921 | <i>CKMT1B</i>   | -1.375 | 134 | 28  | 8.40E-03 |
| cg17170504 | <i>HSPC065</i>  | 2.208  | 71  | 91  | 8.40E-03 |
| cg17020834 | <i>GRIA1</i>    | -3.890 | 107 | 55  | 8.41E-03 |
| cg15750705 | <i>GJB4</i>     | 3.049  | 106 | 56  | 8.42E-03 |
| cg06618866 | <i>TLR2</i>     | -2.713 | 96  | 66  | 8.42E-03 |
| cg08550724 | <i>C6orf182</i> | 2.539  | 99  | 63  | 8.42E-03 |
| cg09669099 | <i>TERF2</i>    | -2.884 | 84  | 78  | 8.42E-03 |
| cg24988345 | <i>SCHIP1</i>   | -0.619 | 123 | 39  | 8.42E-03 |
| cg03738959 | <i>MCART1</i>   | -5.447 | 69  | 93  | 8.43E-03 |
| cg07873128 | <i>OSBPL5</i>   | 3.236  | 95  | 67  | 8.43E-03 |
| cg07447773 | <i>AKR7A3</i>   | 1.515  | 73  | 89  | 8.44E-03 |
| cg16863447 | <i>TMEM117</i>  | -3.382 | 25  | 137 | 8.45E-03 |
| cg00187380 | <i>HOXC5</i>    | -2.618 | 51  | 111 | 8.45E-03 |
| cg15777570 | <i>CCL27</i>    | 2.492  | 120 | 42  | 8.45E-03 |
| cg21850069 | <i>TRIM41</i>   | -4.543 | 72  | 90  | 8.45E-03 |
| cg04595372 | <i>CRISP2</i>   | 0.273  | 56  | 106 | 8.45E-03 |
| cg20851245 | <i>RNF25</i>    | 2.919  | 100 | 62  | 8.45E-03 |
| cg25477181 | <i>PITPNB</i>   | -5.308 | 52  | 110 | 8.45E-03 |
| cg13274713 | <i>TBX2</i>     | -4.251 | 69  | 93  | 8.46E-03 |
| cg05382123 | <i>CSMD2</i>    | -3.721 | 78  | 84  | 8.46E-03 |
| cg00415978 | <i>SYNPO2</i>   | -3.074 | 118 | 44  | 8.46E-03 |
| cg11104347 | <i>DUSP23</i>   | -4.705 | 79  | 83  | 8.47E-03 |
| cg10160407 | <i>PDGFRL</i>   | -5.681 | 50  | 112 | 8.47E-03 |
| cg08998967 | <i>SLC25A13</i> | -4.578 | 95  | 67  | 8.47E-03 |
| cg26789453 | <i>TMEM116</i>  | 0.634  | 56  | 105 | 8.47E-03 |
| cg17489622 | <i>TMEM24</i>   | -5.347 | 64  | 98  | 8.48E-03 |

|            |                  |        |     |     |          |
|------------|------------------|--------|-----|-----|----------|
| cg16466334 | <i>MMP3</i>      | 1.784  | 102 | 60  | 8.48E-03 |
| cg10501629 | <i>ATP2B1</i>    | 2.512  | 22  | 140 | 8.49E-03 |
| cg11939496 | <i>CD244</i>     | 1.033  | 95  | 67  | 8.49E-03 |
| cg19517291 | <i>NMB</i>       | 2.322  | 82  | 80  | 8.49E-03 |
| cg18966791 | <i>C1orf61</i>   | -4.114 | 58  | 104 | 8.49E-03 |
| cg11368946 | <i>GCAT</i>      | -3.804 | 37  | 125 | 8.50E-03 |
| cg23266266 | <i>DCUN1D4</i>   | -4.946 | 61  | 101 | 8.51E-03 |
| cg03558807 | <i>TIGA1</i>     | 3.482  | 70  | 92  | 8.51E-03 |
| cg03309721 | <i>PLEKHJ1</i>   | -5.023 | 74  | 88  | 8.52E-03 |
| cg00625653 | <i>WNT7A</i>     | -3.893 | 75  | 87  | 8.53E-03 |
| cg08302713 | <i>GCLC</i>      | -3.802 | 90  | 72  | 8.53E-03 |
| cg14058345 | <i>TXNDC6</i>    | -4.135 | 83  | 79  | 8.53E-03 |
| cg16158807 | <i>WNK2</i>      | -3.102 | 98  | 64  | 8.53E-03 |
| cg25559100 | <i>CSNK2A1</i>   | -4.831 | 53  | 109 | 8.54E-03 |
| cg24012887 | <i>BTBD14B</i>   | -3.875 | 73  | 89  | 8.54E-03 |
| cg12732155 | <i>LAPTM5</i>    | -0.379 | 57  | 105 | 8.54E-03 |
| cg04056179 | <i>PREI3</i>     | -3.781 | 80  | 82  | 8.54E-03 |
| cg09298623 | <i>ROPN1</i>     | -0.867 | 107 | 55  | 8.54E-03 |
| cg01359534 | <i>AQP10</i>     | 0.945  | 86  | 76  | 8.55E-03 |
| cg02397720 | <i>RAB17</i>     | -1.705 | 138 | 24  | 8.55E-03 |
| cg21264055 | <i>PRR3</i>      | -2.859 | 97  | 65  | 8.55E-03 |
| cg15785720 | <i>C9orf140</i>  | -5.179 | 58  | 104 | 8.55E-03 |
| cg15649193 | <i>GPSN2</i>     | -4.218 | 95  | 67  | 8.56E-03 |
| cg17417191 | <i>CGI-115</i>   | -2.936 | 79  | 83  | 8.56E-03 |
| cg26149550 | <i>KLK15</i>     | 1.446  | 72  | 90  | 8.56E-03 |
| cg03805442 | <i>ACCN1</i>     | 1.912  | 59  | 103 | 8.56E-03 |
| cg23983340 | <i>CD46</i>      | -4.900 | 81  | 81  | 8.56E-03 |
| cg09775312 | <i>PPP1R3C</i>   | -5.379 | 94  | 68  | 8.57E-03 |
| cg08016383 | <i>ADAMTS17</i>  | -4.543 | 103 | 59  | 8.57E-03 |
| cg16739396 | <i>ATG4C</i>     | -2.661 | 83  | 79  | 8.58E-03 |
| cg22506059 | <i>CARD10</i>    | 2.055  | 136 | 26  | 8.58E-03 |
| cg10705251 | <i>ZNF683</i>    | 2.636  | 137 | 25  | 8.60E-03 |
| cg16022344 | <i>COX5B</i>     | -4.893 | 81  | 81  | 8.60E-03 |
| cg24777762 | <i>TNFRSF19L</i> | -3.916 | 53  | 109 | 8.60E-03 |
| cg01377911 | <i>NTF5</i>      | -2.009 | 80  | 82  | 8.60E-03 |
| cg13315690 | <i>OVCA2</i>     | -2.278 | 57  | 105 | 8.60E-03 |
| cg18146152 | <i>GNPTG</i>     | 1.729  | 57  | 105 | 8.61E-03 |
| cg12110626 | <i>FAM18B2</i>   | -2.648 | 53  | 108 | 8.61E-03 |
| cg06022562 | <i>FLJ13841</i>  | 2.175  | 40  | 122 | 8.61E-03 |
| cg13549845 | <i>GRID2</i>     | -2.934 | 74  | 88  | 8.62E-03 |
| cg12584718 | <i>BCDIN3</i>    | -1.729 | 30  | 132 | 8.62E-03 |
| cg25068445 | <i>TRAF2</i>     | -5.003 | 83  | 79  | 8.62E-03 |
| cg24856732 | <i>SCO2</i>      | -4.163 | 78  | 84  | 8.62E-03 |
| cg02964389 | <i>PSMD9</i>     | -3.124 | 38  | 124 | 8.62E-03 |
| cg24890286 | <i>HIPK2</i>     | 2.417  | 49  | 113 | 8.62E-03 |
| cg05829479 | <i>C6orf141</i>  | -2.126 | 97  | 65  | 8.63E-03 |
| cg14709481 | <i>HK3</i>       | 2.022  | 48  | 114 | 8.64E-03 |
| cg00949554 | <i>UBE2E3</i>    | -3.021 | 27  | 135 | 8.64E-03 |
| cg24459209 | <i>PRG3</i>      | 1.374  | 61  | 101 | 8.64E-03 |
| cg25133016 | <i>PIP5K2C</i>   | -3.006 | 95  | 67  | 8.64E-03 |
| cg07549715 | <i>GNRH2</i>     | 0.498  | 78  | 84  | 8.64E-03 |
| cg17198722 | <i>PRDX3</i>     | -5.684 | 117 | 45  | 8.64E-03 |
| cg17301902 | <i>GNA14</i>     | -3.245 | 75  | 87  | 8.64E-03 |
| cg03064067 | <i>SLC6A15</i>   | -2.544 | 72  | 90  | 8.65E-03 |
| cg18384403 | <i>TUBB2A</i>    | -5.663 | 112 | 50  | 8.65E-03 |

|            |                  |        |     |     |          |
|------------|------------------|--------|-----|-----|----------|
| cg08635242 | <i>CPD</i>       | -3.683 | 70  | 92  | 8.66E-03 |
| cg16752583 | <i>TRPV6</i>     | 0.260  | 71  | 91  | 8.66E-03 |
| cg24206256 | <i>MAT2B</i>     | -3.644 | 108 | 54  | 8.67E-03 |
| cg07613153 | <i>TDRD9</i>     | -0.050 | 109 | 52  | 8.67E-03 |
| cg23696886 | <i>PDLIM2</i>    | -4.092 | 62  | 100 | 8.67E-03 |
| cg11484288 | <i>PTPN23</i>    | -5.427 | 39  | 123 | 8.68E-03 |
| cg27557143 | <i>GMIP</i>      | -4.861 | 105 | 57  | 8.70E-03 |
| cg02990033 | <i>GFRA4</i>     | -0.004 | 83  | 79  | 8.70E-03 |
| cg14908548 | <i>MAML1</i>     | -4.445 | 102 | 60  | 8.71E-03 |
| cg19869139 | <i>OPRD1</i>     | 2.612  | 75  | 87  | 8.72E-03 |
| cg21420531 | <i>SLC5A6</i>    | -3.585 | 103 | 59  | 8.72E-03 |
| cg20866788 | <i>ARL1</i>      | -4.797 | 97  | 65  | 8.72E-03 |
| cg17036737 | <i>RBM8A</i>     | -0.161 | 60  | 102 | 8.72E-03 |
| cg14196790 | <i>SLC22A5</i>   | -2.209 | 80  | 82  | 8.72E-03 |
| cg01195127 | <i>YIPF4</i>     | -4.006 | 51  | 111 | 8.73E-03 |
| cg25640176 | <i>MGC11335</i>  | -5.797 | 101 | 61  | 8.73E-03 |
| cg01333788 | <i>GJB5</i>      | 0.764  | 121 | 41  | 8.73E-03 |
| cg24646513 | <i>MTERFD3</i>   | -4.051 | 64  | 98  | 8.73E-03 |
| cg08624068 | <i>STARD6</i>    | 2.520  | 93  | 69  | 8.73E-03 |
| cg16124337 | <i>UBE2J1</i>    | -4.470 | 84  | 78  | 8.73E-03 |
| cg14874121 | <i>HSD17B4</i>   | -5.497 | 84  | 78  | 8.73E-03 |
| cg03389164 | <i>ASB2</i>      | 2.622  | 56  | 106 | 8.73E-03 |
| cg03522910 | <i>B4GALT3</i>   | -4.962 | 66  | 96  | 8.73E-03 |
| cg04761824 | <i>44166</i>     | 2.990  | 88  | 74  | 8.74E-03 |
| cg01429181 | <i>WDR42A</i>    | -3.852 | 79  | 83  | 8.74E-03 |
| cg00893242 | <i>SND1</i>      | -4.305 | 78  | 84  | 8.75E-03 |
| cg00459975 | <i>HMBOX1</i>    | -4.679 | 119 | 43  | 8.75E-03 |
| cg12365667 | <i>HLA-DPB1</i>  | -2.758 | 108 | 54  | 8.75E-03 |
| cg13686115 | <i>PHYHIPL</i>   | -3.846 | 105 | 57  | 8.75E-03 |
| cg20050012 | <i>KIAA0100</i>  | -4.074 | 81  | 81  | 8.75E-03 |
| cg02838877 | <i>MBNL2</i>     | -0.345 | 83  | 79  | 8.75E-03 |
| cg20891917 | <i>IFRD1</i>     | 3.580  | 87  | 75  | 8.76E-03 |
| cg26523389 | <i>NFYA</i>      | -4.907 | 65  | 97  | 8.76E-03 |
| cg12413566 | <i>CMYA1</i>     | 2.828  | 75  | 87  | 8.76E-03 |
| cg23440155 | <i>CYP4B1</i>    | -0.835 | 50  | 112 | 8.76E-03 |
| cg06179485 | <i>TMEM54</i>    | -2.386 | 85  | 77  | 8.76E-03 |
| cg02417264 | <i>RAMP3</i>     | -0.904 | 91  | 71  | 8.76E-03 |
| cg12089439 | <i>TUSC3</i>     | -2.429 | 46  | 116 | 8.77E-03 |
| cg17409393 | <i>ATP9A</i>     | -5.217 | 74  | 88  | 8.77E-03 |
| cg04180953 | <i>DSC1</i>      | 0.984  | 50  | 112 | 8.77E-03 |
| cg06918467 | <i>OLIG3</i>     | -2.804 | 53  | 109 | 8.77E-03 |
| cg01843018 | <i>C5</i>        | 1.082  | 135 | 27  | 8.78E-03 |
| cg02121943 | <i>TBX3</i>      | -2.918 | 28  | 134 | 8.79E-03 |
| cg15488402 | <i>SLC9A8</i>    | -3.271 | 91  | 71  | 8.79E-03 |
| cg19044630 | <i>C9orf65</i>   | -4.393 | 99  | 63  | 8.79E-03 |
| cg15640375 | <i>PRG2</i>      | -2.846 | 107 | 55  | 8.81E-03 |
| cg05958659 | <i>UNQ1912</i>   | -4.738 | 60  | 102 | 8.82E-03 |
| cg17010112 | <i>GENX-3414</i> | -3.863 | 128 | 34  | 8.82E-03 |
| cg26602920 | <i>LOC51315</i>  | -3.840 | 61  | 101 | 8.82E-03 |
| cg11809085 | <i>TNFSF15</i>   | 0.516  | 75  | 87  | 8.83E-03 |
| cg24879595 | <i>ARF6</i>      | -2.568 | 36  | 126 | 8.83E-03 |
| cg03293770 | <i>FLJ20487</i>  | -4.724 | 46  | 116 | 8.83E-03 |
| cg16530429 | <i>LIN28</i>     | -2.549 | 72  | 90  | 8.83E-03 |
| cg26324973 | <i>MAP3K3</i>    | -5.740 | 71  | 91  | 8.83E-03 |
| cg23353982 | <i>TBX6</i>      | -5.441 | 75  | 87  | 8.84E-03 |

|            |                  |        |     |     |          |
|------------|------------------|--------|-----|-----|----------|
| cg19035457 | <i>TPARL</i>     | -3.371 | 110 | 51  | 8.84E-03 |
| cg20580177 | <i>LRFN3</i>     | 0.257  | 88  | 74  | 8.85E-03 |
| cg00314943 | <i>ALPPL2</i>    | 2.248  | 52  | 110 | 8.86E-03 |
| cg23285573 | <i>PON2</i>      | -4.732 | 101 | 61  | 8.86E-03 |
| cg27250927 | <i>HPS5</i>      | -4.192 | 82  | 80  | 8.86E-03 |
| cg20043466 | <i>C2orf19</i>   | -4.216 | 96  | 66  | 8.86E-03 |
| cg23689916 | <i>CHMP5</i>     | -3.507 | 80  | 82  | 8.87E-03 |
| cg11847808 | <i>EPHA8</i>     | -3.027 | 115 | 47  | 8.87E-03 |
| cg03114244 | <i>FEN1</i>      | -4.382 | 110 | 52  | 8.87E-03 |
| cg04081402 | <i>TCN2</i>      | 1.029  | 95  | 67  | 8.88E-03 |
| cg13818368 | <i>SPAG7</i>     | -4.537 | 95  | 67  | 8.88E-03 |
| cg20835282 | <i>C3orf62</i>   | -5.630 | 126 | 36  | 8.88E-03 |
| cg02254461 | <i>AXUD1</i>     | 0.374  | 69  | 93  | 8.89E-03 |
| cg17229197 | <i>KCNQ1</i>     | 1.808  | 84  | 78  | 8.89E-03 |
| cg04330084 | <i>FLJ35834</i>  | -3.574 | 102 | 60  | 8.89E-03 |
| cg17749384 | <i>MPP7</i>      | 1.506  | 82  | 80  | 8.89E-03 |
| cg08551857 | <i>PAG1</i>      | -4.569 | 53  | 109 | 8.89E-03 |
| cg05280555 | <i>CNOT10</i>    | -4.633 | 82  | 80  | 8.92E-03 |
| cg20633959 | <i>NRF1</i>      | -4.420 | 72  | 90  | 8.92E-03 |
| cg24345138 | <i>KLHL25</i>    | -4.576 | 82  | 80  | 8.93E-03 |
| cg20714328 | <i>THBS4</i>     | 1.516  | 65  | 97  | 8.94E-03 |
| cg17309462 | <i>C2orf38</i>   | -3.762 | 47  | 115 | 8.94E-03 |
| cg06173079 | <i>DGCR6</i>     | -3.865 | 84  | 78  | 8.95E-03 |
| cg17076921 | <i>CAMK2G</i>    | -3.938 | 89  | 73  | 8.96E-03 |
| cg05668853 | <i>RAB34</i>     | -0.069 | 51  | 111 | 8.96E-03 |
| cg02403232 | <i>GOLGA3</i>    | -4.930 | 135 | 27  | 8.96E-03 |
| cg07638935 | <i>KAZALD1</i>   | -2.422 | 97  | 65  | 8.96E-03 |
| cg25092540 | <i>NUP188</i>    | 3.135  | 74  | 88  | 8.96E-03 |
| cg11558474 | <i>TMEM2</i>     | -3.192 | 96  | 66  | 8.96E-03 |
| cg08477744 | <i>MFAP2</i>     | 3.077  | 49  | 113 | 8.97E-03 |
| cg24968786 | <i>FLJ10786</i>  | -4.488 | 69  | 93  | 8.97E-03 |
| cg01025842 | <i>TRADD</i>     | -4.873 | 110 | 52  | 8.97E-03 |
| cg07611925 | <i>KCNE2</i>     | 2.166  | 63  | 90  | 8.97E-03 |
| cg22116290 | <i>SMPD3</i>     | -3.070 | 74  | 88  | 8.97E-03 |
| cg18953280 | <i>TBC1D19</i>   | -4.753 | 52  | 110 | 8.98E-03 |
| cg13448625 | <i>COL17A1</i>   | 2.192  | 116 | 46  | 8.99E-03 |
| cg14930706 | <i>NALP4</i>     | 2.878  | 92  | 70  | 9.00E-03 |
| cg12241297 | <i>HNRPA0</i>    | -3.158 | 60  | 102 | 9.00E-03 |
| cg22461018 | <i>MORF4</i>     | 1.037  | 55  | 107 | 9.00E-03 |
| cg16218387 | <i>FAM8A1</i>    | -5.073 | 104 | 58  | 9.00E-03 |
| cg21950493 | <i>ATPBD1C</i>   | -3.730 | 73  | 89  | 9.01E-03 |
| cg21171130 | <i>C14orf122</i> | -5.439 | 64  | 98  | 9.01E-03 |
| cg18242682 | <i>FO XK2</i>    | -5.413 | 52  | 110 | 9.01E-03 |
| cg19238398 | <i>DNAJC18</i>   | -3.435 | 103 | 59  | 9.01E-03 |
| cg01424107 | <i>CDX2</i>      | -4.774 | 122 | 40  | 9.01E-03 |
| cg22283148 | <i>LSM6</i>      | -5.062 | 90  | 72  | 9.01E-03 |
| cg25697050 | <i>INPP5D</i>    | 3.516  | 18  | 144 | 9.01E-03 |
| cg24500683 | <i>PTP4A1</i>    | -3.293 | 72  | 90  | 9.02E-03 |
| cg03984733 | <i>HDHD3</i>     | -5.391 | 96  | 66  | 9.02E-03 |
| cg21413251 | <i>PIP5K1B</i>   | -6.000 | 122 | 40  | 9.03E-03 |
| cg04103514 | <i>EMR2</i>      | -1.676 | 128 | 34  | 9.03E-03 |
| cg09591663 | <i>C6orf66</i>   | -4.699 | 103 | 59  | 9.03E-03 |
| cg00980978 | <i>WFDC2</i>     | -4.223 | 65  | 97  | 9.03E-03 |
| cg26144265 | <i>BZW2</i>      | -4.492 | 39  | 123 | 9.04E-03 |
| cg06803253 | <i>GNAT1</i>     | 3.232  | 48  | 114 | 9.04E-03 |

|            |                 |        |     |     |          |
|------------|-----------------|--------|-----|-----|----------|
| cg21640749 | <i>CD300LF</i>  | 1.541  | 96  | 66  | 9.04E-03 |
| cg11207564 | <i>CCL3L3</i>   | -1.650 | 67  | 95  | 9.04E-03 |
| cg22718139 | <i>HMGCS2</i>   | 3.641  | 35  | 127 | 9.04E-03 |
| cg05046097 | <i>SNCG</i>     | 0.233  | 133 | 29  | 9.04E-03 |
| cg08993267 | <i>BRCA1</i>    | -3.517 | 49  | 113 | 9.04E-03 |
| cg14481339 | <i>KCNJ1</i>    | 0.989  | 67  | 95  | 9.04E-03 |
| cg18020749 | <i>LRRC37A</i>  | 3.822  | 61  | 101 | 9.04E-03 |
| cg14360897 | <i>RNF167</i>   | -3.535 | 110 | 52  | 9.05E-03 |
| cg03766998 | <i>AFG3L2</i>   | -2.554 | 54  | 108 | 9.05E-03 |
| cg16753209 | <i>NEB</i>      | 0.657  | 142 | 20  | 9.05E-03 |
| cg26390526 | <i>FLG</i>      | 2.674  | 42  | 120 | 9.05E-03 |
| cg04962134 | <i>TRIM51</i>   | 1.393  | 72  | 90  | 9.05E-03 |
| cg13085976 | <i>FLJ20245</i> | 0.833  | 98  | 64  | 9.06E-03 |
| cg15164958 | <i>MGC33530</i> | -3.875 | 83  | 79  | 9.06E-03 |
| cg24919972 | <i>FYCO1</i>    | -2.063 | 98  | 64  | 9.06E-03 |
| cg23575320 | <i>C14orf58</i> | -4.164 | 32  | 130 | 9.07E-03 |
| cg07977490 | <i>C16orf45</i> | 2.054  | 52  | 110 | 9.08E-03 |
| cg22747092 | <i>BTBD14A</i>  | -1.682 | 45  | 117 | 9.08E-03 |
| cg03623878 | <i>MCF2L</i>    | -2.983 | 98  | 64  | 9.08E-03 |
| cg09131135 | <i>SUPT7L</i>   | -3.997 | 43  | 119 | 9.08E-03 |
| cg12856392 | <i>ZNF588</i>   | 0.812  | 19  | 143 | 9.08E-03 |
| cg11787828 | <i>C6orf66</i>  | -3.855 | 68  | 94  | 9.08E-03 |
| cg16672449 | <i>RUVBL1</i>   | -5.007 | 87  | 75  | 9.08E-03 |
| cg07029998 | <i>FRAP1</i>    | -4.111 | 119 | 43  | 9.09E-03 |
| cg21263122 | <i>SSTR1</i>    | -3.953 | 113 | 49  | 9.10E-03 |
| cg12163132 | <i>TBX2</i>     | -1.577 | 84  | 78  | 9.10E-03 |
| cg14817143 | <i>TTPA</i>     | -4.280 | 117 | 45  | 9.10E-03 |
| cg11812218 | <i>GHSR</i>     | -3.075 | 87  | 75  | 9.11E-03 |
| cg15118503 | <i>AHSA2</i>    | -3.572 | 73  | 89  | 9.11E-03 |
| cg22791453 | <i>ASS</i>      | -2.447 | 122 | 40  | 9.11E-03 |
| cg03688818 | <i>APEH</i>     | -3.743 | 72  | 90  | 9.11E-03 |
| cg26847866 | <i>SCARA3</i>   | -0.011 | 99  | 63  | 9.11E-03 |
| cg16756998 | <i>ZDHHC8</i>   | -5.506 | 64  | 98  | 9.11E-03 |
| cg19973884 | <i>ZDHHC12</i>  | -3.381 | 60  | 102 | 9.11E-03 |
| cg22024876 | <i>KBTBD3</i>   | -5.638 | 70  | 92  | 9.12E-03 |
| cg22155248 | <i>TAPBPL</i>   | -3.823 | 66  | 96  | 9.12E-03 |
| cg13493559 | <i>PLCB3</i>    | -5.238 | 83  | 79  | 9.13E-03 |
| cg21167159 | <i>H19</i>      | 2.415  | 49  | 113 | 9.13E-03 |
| cg25580076 | <i>MRPL43</i>   | 1.715  | 125 | 37  | 9.14E-03 |
| cg09542291 | <i>SMCP</i>     | 2.584  | 36  | 126 | 9.14E-03 |
| cg12478809 | <i>COX5A</i>    | -4.846 | 91  | 71  | 9.14E-03 |
| cg08535373 | <i>SLC32A1</i>  | -3.392 | 92  | 70  | 9.14E-03 |
| cg23557926 | <i>CFH</i>      | -2.471 | 92  | 70  | 9.15E-03 |
| cg09099744 | <i>CDKN2A</i>   | -3.899 | 110 | 52  | 9.15E-03 |
| cg04902405 | <i>ZC3H11A</i>  | 0.921  | 83  | 79  | 9.15E-03 |
| cg09585834 | <i>ANKS3</i>    | -4.290 | 59  | 103 | 9.15E-03 |
| cg04886198 | <i>ALG3</i>     | -3.016 | 48  | 114 | 9.16E-03 |
| cg12025941 | <i>RFX4</i>     | -3.276 | 52  | 110 | 9.16E-03 |
| cg23390397 | <i>MICAL1</i>   | -4.101 | 114 | 48  | 9.16E-03 |
| cg16307860 | <i>C1orf80</i>  | -2.092 | 60  | 102 | 9.16E-03 |
| cg20477070 | <i>ARG2</i>     | -4.337 | 109 | 53  | 9.17E-03 |
| cg26174752 | <i>GPR63</i>    | -2.634 | 97  | 65  | 9.18E-03 |
| cg18783796 | <i>C6orf199</i> | -3.367 | 56  | 106 | 9.19E-03 |
| cg23845773 | <i>TAF10</i>    | -5.081 | 49  | 113 | 9.19E-03 |
| cg04409427 | <i>KCNE2</i>    | 2.704  | 29  | 133 | 9.20E-03 |

|            |           |        |     |     |          |
|------------|-----------|--------|-----|-----|----------|
| cg02119982 | CARD15    | 1.814  | 27  | 135 | 9.20E-03 |
| cg05889321 | ALDH18A1  | -2.348 | 106 | 56  | 9.21E-03 |
| cg14425294 | GUCY2D    | -2.099 | 95  | 67  | 9.21E-03 |
| cg04801003 | ANTXR1    | -4.662 | 132 | 30  | 9.21E-03 |
| cg14571620 | FLJ38663  | -4.770 | 85  | 77  | 9.22E-03 |
| cg18420965 | EPHA5     | -2.840 | 116 | 46  | 9.23E-03 |
| cg05698069 | PDLIM2    | -3.239 | 61  | 101 | 9.24E-03 |
| cg20472189 | VENTX     | 1.095  | 102 | 60  | 9.24E-03 |
| cg04030848 | GAL3ST1   | 0.231  | 42  | 120 | 9.24E-03 |
| cg22013966 | SERPINA13 | 1.666  | 52  | 110 | 9.24E-03 |
| cg26538214 | KLF6      | -4.473 | 37  | 125 | 9.24E-03 |
| cg03262918 | BBX       | -5.182 | 87  | 75  | 9.25E-03 |
| cg13135127 | ASH1L     | -5.422 | 107 | 55  | 9.25E-03 |
| cg19346193 | UROS      | 2.001  | 64  | 98  | 9.25E-03 |
| cg23948756 | KNS2      | -5.164 | 94  | 68  | 9.25E-03 |
| cg11231018 | LIPF      | 2.544  | 93  | 69  | 9.25E-03 |
| cg11005091 | HNRPA1    | -3.741 | 88  | 74  | 9.25E-03 |
| cg23060239 | RUSC1     | -5.341 | 33  | 129 | 9.25E-03 |
| cg06437004 | LDHB      | -4.706 | 68  | 94  | 9.25E-03 |
| cg18429742 | ZDHHC11   | 0.791  | 67  | 95  | 9.26E-03 |
| cg02849695 | CCDC19    | -1.115 | 48  | 114 | 9.26E-03 |
| cg06493080 | HOXB7     | -3.657 | 73  | 89  | 9.26E-03 |
| cg02114786 | PTTG1IP   | -5.092 | 106 | 56  | 9.27E-03 |
| cg04220579 | C7orf20   | -3.976 | 103 | 59  | 9.27E-03 |
| cg15341340 | DNASE2    | -4.473 | 53  | 109 | 9.28E-03 |
| cg02936468 | C9orf41   | -4.734 | 59  | 103 | 9.28E-03 |
| cg08085267 | C17orf57  | -2.632 | 107 | 54  | 9.28E-03 |
| cg11172196 | TMEM65    | -5.115 | 70  | 92  | 9.28E-03 |
| cg25240333 | RPP14     | -3.755 | 94  | 68  | 9.30E-03 |
| cg12089698 | SPATC1    | 0.426  | 49  | 113 | 9.30E-03 |
| cg04001333 | C14orf58  | -1.081 | 79  | 83  | 9.30E-03 |
| cg15278682 | TACR2     | 3.833  | 25  | 137 | 9.31E-03 |
| cg10501065 | IGF2AS    | -3.987 | 85  | 77  | 9.31E-03 |
| cg08081725 | NDE1      | -3.469 | 117 | 45  | 9.32E-03 |
| cg01481976 | POLE3     | 2.403  | 65  | 97  | 9.32E-03 |
| cg18735146 | TTC10     | -0.338 | 64  | 98  | 9.32E-03 |
| cg25256723 | F5        | -0.001 | 133 | 29  | 9.34E-03 |
| cg15303841 | RFPL1     | 2.390  | 50  | 112 | 9.34E-03 |
| cg12168164 | TARS      | -5.671 | 39  | 123 | 9.34E-03 |
| cg25974764 | KLHDC2    | -5.373 | 62  | 100 | 9.34E-03 |
| cg10832166 | PWCR1     | 2.174  | 44  | 118 | 9.34E-03 |
| cg21218636 | PCTP      | -5.240 | 91  | 71  | 9.34E-03 |
| cg17580045 | CCND2     | -2.373 | 105 | 57  | 9.34E-03 |
| cg16078836 | MAP3K13   | -3.619 | 73  | 89  | 9.34E-03 |
| cg22995176 | UPK3B     | -3.489 | 134 | 27  | 9.35E-03 |
| cg23806715 | H3F3B     | -4.826 | 114 | 48  | 9.35E-03 |
| cg03173722 | RUFY3     | -1.087 | 47  | 115 | 9.36E-03 |
| cg23127998 | FLRT3     | -3.326 | 85  | 77  | 9.36E-03 |
| cg22802439 | UPK1A     | 1.197  | 104 | 58  | 9.36E-03 |
| cg18071006 | ULBP3     | -5.004 | 48  | 114 | 9.36E-03 |
| cg22933847 | MRGPRF    | -1.254 | 143 | 19  | 9.36E-03 |
| cg14820798 | FLJ12700  | -3.820 | 89  | 73  | 9.37E-03 |
| cg18380975 | C6orf1    | -4.574 | 23  | 139 | 9.37E-03 |
| cg10773309 | BAI2      | -2.816 | 58  | 104 | 9.37E-03 |
| cg16312163 | ALDH1L1   | -4.410 | 109 | 53  | 9.37E-03 |

|            |                  |        |     |     |          |
|------------|------------------|--------|-----|-----|----------|
| cg02164442 | <i>ITGAD</i>     | 0.136  | 74  | 88  | 9.37E-03 |
| cg08805338 | <i>PPP3CB</i>    | -5.033 | 56  | 106 | 9.37E-03 |
| cg06630737 | <i>C1orf187</i>  | -4.077 | 37  | 125 | 9.37E-03 |
| cg23033845 | <i>TMEM88</i>    | 1.132  | 131 | 31  | 9.38E-03 |
| cg15239703 | <i>CBR4</i>      | -5.222 | 90  | 72  | 9.39E-03 |
| cg02304930 | <i>SERTAD4</i>   | -3.960 | 85  | 75  | 9.39E-03 |
| cg00983899 | <i>CABP2</i>     | 1.023  | 72  | 90  | 9.40E-03 |
| cg04066242 | <i>BFAR</i>      | -4.776 | 47  | 115 | 9.40E-03 |
| cg26073856 | <i>FABP2</i>     | 0.729  | 78  | 83  | 9.40E-03 |
| cg05951646 | <i>RYK</i>       | -3.965 | 44  | 118 | 9.41E-03 |
| cg09884077 | <i>NIPA1</i>     | -4.371 | 25  | 137 | 9.41E-03 |
| cg19690101 | <i>DHX57</i>     | 1.805  | 67  | 95  | 9.41E-03 |
| cg23750142 | <i>CA8</i>       | -5.370 | 87  | 75  | 9.41E-03 |
| cg14961385 | <i>SPAG4</i>     | -3.812 | 78  | 84  | 9.42E-03 |
| cg12914062 | <i>EXOC1</i>     | -5.092 | 103 | 59  | 9.42E-03 |
| cg06650786 | <i>NOTCH3</i>    | -1.790 | 109 | 52  | 9.43E-03 |
| cg08016363 | <i>TMEM11</i>    | -2.310 | 53  | 109 | 9.43E-03 |
| cg06438404 | <i>COX4NB</i>    | -5.039 | 95  | 67  | 9.44E-03 |
| cg19797659 | <i>OAZ2</i>      | -2.799 | 68  | 93  | 9.45E-03 |
| cg11459822 | <i>TADA1L</i>    | -4.459 | 94  | 68  | 9.45E-03 |
| cg16490390 | <i>LENG4</i>     | -4.602 | 54  | 108 | 9.47E-03 |
| cg13158571 | <i>CYP4X1</i>    | -3.351 | 76  | 86  | 9.47E-03 |
| cg09209002 | <i>SAS10</i>     | -4.381 | 85  | 77  | 9.47E-03 |
| cg15722679 | <i>SIRPB2</i>    | -0.818 | 72  | 90  | 9.47E-03 |
| cg18237405 | <i>CPNE5</i>     | -4.828 | 78  | 84  | 9.47E-03 |
| cg02706881 | <i>C21orf123</i> | 2.818  | 40  | 122 | 9.48E-03 |
| cg17391929 | <i>NEDD8</i>     | -3.720 | 83  | 79  | 9.48E-03 |
| cg24735937 | <i>CLTB</i>      | 0.580  | 111 | 51  | 9.49E-03 |
| cg03055440 | <i>MS4A6A</i>    | 1.242  | 81  | 81  | 9.49E-03 |
| cg04283392 | <i>LRRC33</i>    | -3.521 | 74  | 88  | 9.49E-03 |
| cg15379237 | <i>B4GALT2</i>   | -4.120 | 55  | 107 | 9.50E-03 |
| cg20592700 | <i>WIPI2</i>     | -3.755 | 40  | 122 | 9.50E-03 |
| cg01400401 | <i>C19orf30</i>  | -1.637 | 94  | 68  | 9.50E-03 |
| cg26036443 | <i>EHD2</i>      | -3.503 | 43  | 119 | 9.51E-03 |
| cg17564818 | <i>CHST5</i>     | 2.638  | 76  | 86  | 9.51E-03 |
| cg25203561 | <i>SFRS16</i>    | 3.217  | 34  | 128 | 9.51E-03 |
| cg27417997 | <i>SHRM</i>      | -2.007 | 54  | 108 | 9.52E-03 |
| cg17471019 | <i>TMEM67</i>    | -5.231 | 63  | 99  | 9.52E-03 |
| cg25764191 | <i>INA</i>       | -3.384 | 23  | 139 | 9.52E-03 |
| cg11777321 | <i>TEF</i>       | -4.760 | 78  | 84  | 9.54E-03 |
| cg17801256 | <i>ZMYM4</i>     | -5.887 | 81  | 81  | 9.55E-03 |
| cg03572913 | <i>C20orf52</i>  | -3.689 | 81  | 81  | 9.55E-03 |
| cg09542111 | <i>GRIK1</i>     | -3.868 | 52  | 110 | 9.55E-03 |
| cg04338788 | <i>SEMA3G</i>    | 2.176  | 69  | 93  | 9.56E-03 |
| cg05032943 | <i>SFRS4</i>     | -4.010 | 77  | 85  | 9.56E-03 |
| cg04037952 | <i>GPR148</i>    | 4.910  | 54  | 108 | 9.56E-03 |
| cg09837977 | <i>LRRN3</i>     | 0.269  | 108 | 54  | 9.57E-03 |
| cg21012874 | <i>SNCG</i>      | -0.318 | 87  | 75  | 9.57E-03 |
| cg04276232 | <i>UGT2B4</i>    | 1.508  | 127 | 35  | 9.59E-03 |
| cg01309153 | <i>SURF1</i>     | 2.063  | 131 | 31  | 9.59E-03 |
| cg11368509 | <i>SUV420H2</i>  | -3.463 | 115 | 47  | 9.59E-03 |
| cg13897627 | <i>FLJ44674</i>  | 1.620  | 95  | 67  | 9.60E-03 |
| cg19136075 | <i>NBL1</i>      | 1.003  | 71  | 90  | 9.60E-03 |
| cg19895197 | <i>C17orf37</i>  | -4.369 | 67  | 95  | 9.60E-03 |
| cg23984130 |                  | 2.426  | 40  | 122 | 9.60E-03 |

|            |          |        |     |     |          |
|------------|----------|--------|-----|-----|----------|
| cg25802093 | SPAG6    | -2.191 | 102 | 60  | 9.60E-03 |
| cg25160554 | ARL6     | -4.523 | 54  | 108 | 9.60E-03 |
| cg00474209 | DLL1     | -3.676 | 100 | 62  | 9.61E-03 |
| cg23960723 | ECHDC3   | -3.712 | 69  | 93  | 9.62E-03 |
| cg10283277 | SNF1LK2  | -3.206 | 52  | 110 | 9.62E-03 |
| cg14914982 | CCND2    | -4.061 | 73  | 89  | 9.63E-03 |
| cg14058432 | PELI2    | -5.026 | 62  | 100 | 9.63E-03 |
| cg05367858 | RNF141   | -5.200 | 43  | 119 | 9.63E-03 |
| cg23126949 | ACCN2    | -2.963 | 77  | 85  | 9.63E-03 |
| cg01139059 | TSN      | -3.788 | 100 | 62  | 9.64E-03 |
| cg26756083 | MMP16    | -3.961 | 47  | 115 | 9.64E-03 |
| cg12661964 | IFI35    | 3.120  | 62  | 100 | 9.64E-03 |
| cg12232274 | LRP11    | -2.659 | 49  | 113 | 9.65E-03 |
| cg13423394 | ABHD6    | -3.707 | 89  | 73  | 9.65E-03 |
| cg15777781 | CUGBP2   | 0.280  | 139 | 23  | 9.66E-03 |
| cg26775866 | PTTG1    | -3.505 | 50  | 112 | 9.67E-03 |
| cg26963271 | PDE4B    | -3.874 | 81  | 81  | 9.67E-03 |
| cg15677294 | TUBB4    | 1.343  | 53  | 109 | 9.67E-03 |
| cg26909431 | SMAD4    | -3.702 | 64  | 98  | 9.68E-03 |
| cg14567401 | FLJ38288 | 0.626  | 111 | 51  | 9.68E-03 |
| cg06791867 | TSPAN18  | 2.606  | 66  | 96  | 9.69E-03 |
| cg25808906 | DGKG     | -4.357 | 63  | 99  | 9.70E-03 |
| cg26475097 | QRICH1   | -4.699 | 71  | 91  | 9.70E-03 |
| cg20261167 | SPP1     | -1.304 | 115 | 47  | 9.71E-03 |
| cg22647507 | PEG10    | 3.035  | 33  | 129 | 9.72E-03 |
| cg03149130 | DIRAS2   | -3.768 | 95  | 67  | 9.72E-03 |
| cg03954173 | CD97     | -4.110 | 33  | 129 | 9.73E-03 |
| cg26920757 | SH2D3C   | -0.758 | 31  | 131 | 9.73E-03 |
| cg07790638 | LOC91431 | 2.246  | 111 | 51  | 9.74E-03 |
| cg25668626 | OAS1     | 0.899  | 33  | 129 | 9.74E-03 |
| cg04733388 | UBE1DC1  | -4.591 | 68  | 94  | 9.75E-03 |
| cg04663194 | ACTN3    | 1.922  | 65  | 97  | 9.78E-03 |
| cg07354209 | FAP      | -0.865 | 89  | 71  | 9.78E-03 |
| cg17947053 | WDR37    | -4.229 | 151 | 11  | 9.78E-03 |
| cg10911660 | ZNF585A  | -5.288 | 108 | 54  | 9.79E-03 |
| cg03209127 | B3GALNT2 | -5.168 | 80  | 82  | 9.80E-03 |
| cg20092036 | UBE3B    | -1.182 | 113 | 49  | 9.80E-03 |
| cg06452647 | MCRS1    | -4.350 | 111 | 51  | 9.80E-03 |
| cg24101578 | CDH22    | -1.524 | 61  | 101 | 9.80E-03 |
| cg10726357 | TSCOT    | 0.306  | 115 | 47  | 9.80E-03 |
| cg11250247 | TBP      | -3.734 | 90  | 72  | 9.81E-03 |
| cg17827767 | LRRC21   | 1.611  | 79  | 83  | 9.81E-03 |
| cg13980308 | ADCK2    | -4.663 | 99  | 63  | 9.81E-03 |
| cg11667117 | CA5A     | 2.493  | 11  | 151 | 9.82E-03 |
| cg13925920 | PSMD12   | -3.858 | 92  | 70  | 9.82E-03 |
| cg18436172 | PTCH     | -4.067 | 128 | 34  | 9.83E-03 |
| cg07036530 | GPR26    | -1.196 | 87  | 75  | 9.83E-03 |
| cg25830052 | TULP1    | 2.849  | 54  | 108 | 9.83E-03 |
| cg02710105 | MAP4K3   | -5.634 | 42  | 120 | 9.83E-03 |
| cg03283569 | RABEPK   | -2.580 | 82  | 80  | 9.83E-03 |
| cg23391006 | OXTR     | -4.750 | 57  | 105 | 9.83E-03 |
| cg08678755 | ENPP3    | 1.879  | 70  | 92  | 9.84E-03 |
| cg14399060 | HOXD4    | -3.280 | 124 | 38  | 9.84E-03 |
| cg07471052 | CDK3     | 2.588  | 87  | 75  | 9.85E-03 |
| cg22126032 | CAV1     | -4.058 | 64  | 98  | 9.85E-03 |

|            |                  |        |     |     |          |
|------------|------------------|--------|-----|-----|----------|
| cg02868123 | <i>REGL</i>      | 2.330  | 46  | 116 | 9.85E-03 |
| cg17921310 | <i>MAPBPIP</i>   | -4.642 | 24  | 138 | 9.87E-03 |
| cg12069042 | <i>PLXNB1</i>    | 0.594  | 91  | 71  | 9.87E-03 |
| cg25852715 | <i>OSBPL5</i>    | 3.615  | 121 | 41  | 9.88E-03 |
| cg18700516 | <i>ZNF230</i>    | -4.362 | 127 | 35  | 9.88E-03 |
| cg16152813 | <i>FAM57B</i>    | -3.874 | 59  | 103 | 9.88E-03 |
| cg12017007 | <i>PHF12</i>     | -5.231 | 100 | 62  | 9.89E-03 |
| cg14705927 | <i>P4HA1</i>     | -3.754 | 36  | 126 | 9.89E-03 |
| cg14939652 | <i>NPAS3</i>     | -4.518 | 69  | 93  | 9.89E-03 |
| cg04613791 | <i>FKBP1A</i>    | -3.883 | 27  | 135 | 9.89E-03 |
| cg06214729 | <i>RENT1</i>     | -4.433 | 94  | 68  | 9.90E-03 |
| cg00704909 | <i>COPB</i>      | -4.690 | 60  | 102 | 9.90E-03 |
| cg03821311 | <i>HIST1H1B</i>  | 1.461  | 102 | 59  | 9.91E-03 |
| cg03723845 | <i>BTNL8</i>     | 2.430  | 89  | 73  | 9.91E-03 |
| cg00069261 | <i>CDR2</i>      | -4.155 | 43  | 119 | 9.91E-03 |
| cg25206802 | <i>SACS</i>      | 2.794  | 105 | 57  | 9.91E-03 |
| cg07944811 | <i>GCK</i>       | 2.775  | 74  | 88  | 9.92E-03 |
| cg08418332 | <i>CCL19</i>     | 1.253  | 75  | 87  | 9.93E-03 |
| cg16345226 | <i>TMEM38A</i>   | -2.968 | 113 | 49  | 9.93E-03 |
| cg17051623 | <i>DDEF1</i>     | -4.918 | 86  | 76  | 9.93E-03 |
| cg14522549 | <i>PDXK</i>      | -4.441 | 91  | 71  | 9.93E-03 |
| cg19335327 | <i>PEG3</i>      | -0.075 | 122 | 40  | 9.94E-03 |
| cg15410903 | <i>GSTO2</i>     | -5.205 | 98  | 64  | 9.94E-03 |
| cg17550582 | <i>SLC2A10</i>   | -5.127 | 92  | 70  | 9.94E-03 |
| cg10583097 | <i>RBM15B</i>    | -6.093 | 71  | 91  | 9.94E-03 |
| cg21769969 | <i>OSTM1</i>     | -2.798 | 144 | 18  | 9.94E-03 |
| cg12456510 | <i>TFF2</i>      | 0.417  | 101 | 61  | 9.94E-03 |
| cg23129478 | <i>ST8SIA5</i>   | -4.244 | 65  | 97  | 9.95E-03 |
| cg23613317 | <i>LARP1</i>     | 0.865  | 117 | 45  | 9.95E-03 |
| cg18008766 | <i>SFRS7</i>     | -2.833 | 45  | 117 | 9.95E-03 |
| cg11299964 | <i>MAPKAP1</i>   | -2.476 | 74  | 88  | 9.96E-03 |
| cg16620731 | <i>ZNF583</i>    | -4.296 | 106 | 56  | 9.97E-03 |
| cg05275231 | <i>SLC25A32</i>  | -3.486 | 31  | 131 | 9.97E-03 |
| cg21011830 | <i>RPL18A</i>    | -3.794 | 85  | 77  | 9.97E-03 |
| cg02831294 | <i>CALML3</i>    | 1.948  | 58  | 104 | 9.97E-03 |
| cg25436946 | <i>TMF1</i>      | -5.028 | 82  | 80  | 9.98E-03 |
| cg02201963 | <i>TNFSF5IP1</i> | -5.305 | 84  | 78  | 9.98E-03 |
| cg08662074 | <i>PAPPA</i>     | -2.697 | 24  | 138 | 9.98E-03 |
| cg07671949 | <i>ESR1</i>      | -2.465 | 67  | 95  | 9.98E-03 |
| cg23320649 | <i>C3orf18</i>   | -0.803 | 46  | 116 | 9.98E-03 |
| cg23854009 | <i>ZNF530</i>    | -3.047 | 60  | 102 | 9.98E-03 |
| cg17122244 | <i>SAPS2</i>     | -4.697 | 114 | 48  | 9.99E-03 |

<sup>a</sup>Probe IDs for the Infinium HumanMethylation27 BeadChip (Illumina).

Supplementary Table 4B. The 130 probes indicating significant differences in recurrence-free survival between patients showing larger DNA methylation alterations and patients showing smaller DNA methylation alterations during transition from the precancerous stage to established cancers.

| Target ID <sup>a</sup> | Gene symbol      | Youden index | Number of patients                         |                                             | FDR, q   |
|------------------------|------------------|--------------|--------------------------------------------|---------------------------------------------|----------|
|                        |                  |              | Showing larger DNA methylation alterations | Showing smaller DNA methylation alterations |          |
|                        |                  |              | $\Delta M_{T-N}$   $\geq$   Youden index   | $\Delta M_{T-N}$   $<$   Youden index       |          |
| cg25047378             | <i>IPO13</i>     | 0.003        | 161                                        | 1                                           | 1.81E-32 |
| cg21651436             | <i>MAP3K11</i>   | 0.001        | 161                                        | 1                                           | 7.31E-09 |
| cg05399697             | <i>LOC400986</i> | 0.402        | 72                                         | 90                                          | 3.08E-05 |
| cg10011623             | <i>GNAS</i>      | 0.007        | 158                                        | 4                                           | 3.08E-05 |
| cg15602809             | <i>CHRM3</i>     | 0.228        | 63                                         | 99                                          | 9.32E-05 |
| cg18515587             | <i>SELENBP1</i>  | 0.093        | 156                                        | 6                                           | 9.32E-05 |
| cg11184091             | <i>DOLPP1</i>    | 0.005        | 160                                        | 2                                           | 1.07E-04 |
| cg18920397             | <i>LY9</i>       | 0.007        | 161                                        | 1                                           | 1.28E-04 |
| cg10331038             | <i>TNR</i>       | 1.318        | 68                                         | 94                                          | 1.86E-04 |
| cg06043114             | <i>TSPAN2</i>    | 0.015        | 158                                        | 4                                           | 2.33E-04 |
| cg10910775             | <i>CDC27</i>     | 0.269        | 70                                         | 92                                          | 3.44E-04 |
| cg15627025             | <i>KIR3DL1</i>   | 0.623        | 101                                        | 61                                          | 3.59E-04 |
| cg27550442             | <i>ZNHIT1</i>    | 0.013        | 160                                        | 2                                           | 3.81E-04 |
| cg00495491             | <i>ITPR2</i>     | 0.387        | 72                                         | 90                                          | 4.12E-04 |
| cg00918005             | <i>REG3G</i>     | 1.634        | 56                                         | 106                                         | 5.14E-04 |
| cg17894008             | <i>NACAL</i>     | 0.805        | 75                                         | 87                                          | 5.44E-04 |
| cg06222851             | <i>OGDHL</i>     | 0.218        | 140                                        | 22                                          | 6.42E-04 |
| cg20311730             | <i>NALP10</i>    | 1.533        | 57                                         | 105                                         | 6.42E-04 |
| cg22039846             | <i>KIR2DL1</i>   | 0.682        | 101                                        | 61                                          | 6.42E-04 |
| cg06101212             | <i>CLDN3</i>     | 0.021        | 156                                        | 6                                           | 6.43E-04 |
| cg06244906             | <i>ZIM2</i>      | 0.651        | 80                                         | 82                                          | 8.49E-04 |
| cg26550234             | <i>SLC39A12</i>  | 1.146        | 52                                         | 110                                         | 9.46E-04 |
| cg04962134             | <i>TRIM51</i>    | 0.384        | 105                                        | 57                                          | 1.01E-03 |
| cg01144251             | <i>KLK9</i>      | 0.723        | 64                                         | 98                                          | 1.09E-03 |
| cg09837943             | <i>ZIM2</i>      | 0.775        | 77                                         | 85                                          | 1.09E-03 |
| cg09868882             | <i>GRM8</i>      | 0.600        | 112                                        | 50                                          | 1.29E-03 |
| cg02497758             | <i>MAFB</i>      | 0.127        | 148                                        | 14                                          | 1.35E-03 |
| cg18484189             | <i>NALP10</i>    | 1.484        | 62                                         | 100                                         | 1.51E-03 |
| cg01146980             | <i>DNAJA5</i>    | 0.019        | 158                                        | 4                                           | 1.65E-03 |
| cg04963951             | <i>FTMT</i>      | 0.841        | 46                                         | 116                                         | 1.67E-03 |
| cg05924191             | <i>FLJ20582</i>  | 0.458        | 38                                         | 124                                         | 1.67E-03 |
| cg08782122             | <i>FLJ42291</i>  | 0.689        | 82                                         | 80                                          | 1.67E-03 |
| cg27341860             | <i>OR2L13</i>    | 1.486        | 66                                         | 96                                          | 1.67E-03 |
| cg08458170             | <i>ZNF537</i>    | 1.174        | 79                                         | 83                                          | 1.87E-03 |
| cg04345908             | <i>HLA-DQB2</i>  | 0.781        | 53                                         | 109                                         | 1.94E-03 |
| cg14547335             | <i>ATP2B2</i>    | 1.169        | 87                                         | 75                                          | 1.94E-03 |
| cg11237817             | <i>KIR3DL3</i>   | 0.764        | 80                                         | 82                                          | 2.09E-03 |
| cg23695504             | <i>FLJ45717</i>  | 0.017        | 160                                        | 2                                           | 2.45E-03 |
| cg25383242             | <i>CNTNAP4</i>   | 0.772        | 74                                         | 88                                          | 2.45E-03 |
| cg27050763             | <i>AHCTF1</i>    | 0.018        | 158                                        | 4                                           | 2.45E-03 |
| cg06650260             | <i>NR0B2</i>     | 0.080        | 156                                        | 6                                           | 2.68E-03 |
| cg02602411             | <i>PPP3R2</i>    | 0.473        | 68                                         | 94                                          | 2.85E-03 |
| cg06409153             | <i>ABCA5</i>     | 1.239        | 38                                         | 124                                         | 2.85E-03 |
| cg08046471             | <i>CXCL11</i>    | 0.003        | 161                                        | 1                                           | 2.85E-03 |
| cg12685753             | <i>TEKT1</i>     | 0.004        | 161                                        | 1                                           | 2.85E-03 |
| cg19042950             | <i>IGF2BP3</i>   | 0.580        | 58                                         | 104                                         | 2.85E-03 |
| cg07973461             | <i>BAGE</i>      | 0.623        | 84                                         | 78                                          | 3.19E-03 |
| cg03029060             | <i>ZNF184</i>    | 0.008        | 158                                        | 4                                           | 3.19E-03 |
| cg20287640             | <i>IRF1</i>      | 0.034        | 153                                        | 9                                           | 3.26E-03 |
| cg24823993             | <i>NHP2L1</i>    | 0.912        | 8                                          | 154                                         | 3.26E-03 |
| cg07711515             | <i>BAG1</i>      | 0.479        | 43                                         | 119                                         | 3.43E-03 |
| cg05767404             | <i>C1orf150</i>  | 1.387        | 74                                         | 88                                          | 4.32E-03 |
| cg27281008             | <i>NARS2</i>     | 0.244        | 75                                         | 87                                          | 4.56E-03 |
| cg20998885             | <i>C20orf79</i>  | 0.503        | 66                                         | 96                                          | 4.65E-03 |
| cg23400451             | <i>MYH4</i>      | 0.636        | 107                                        | 55                                          | 4.65E-03 |

|            |           |       |     |     |          |
|------------|-----------|-------|-----|-----|----------|
| cg24027342 | ATM       | 0.302 | 90  | 72  | 4.65E-03 |
| cg16937611 | SERPINA5  | 0.868 | 56  | 106 | 4.66E-03 |
| cg03029616 | KRTAP6-1  | 0.677 | 55  | 107 | 4.67E-03 |
| cg19857457 | RPL17     | 0.010 | 160 | 2   | 4.67E-03 |
| cg13397379 | OR2C3     | 1.317 | 78  | 84  | 4.74E-03 |
| cg18839416 | C1orf158  | 0.855 | 97  | 65  | 4.74E-03 |
| cg09431062 | SH3GLB2   | 0.112 | 131 | 31  | 4.90E-03 |
| cg00750606 | CDA       | 0.983 | 79  | 83  | 4.94E-03 |
| cg01598642 | HBG1      | 0.347 | 125 | 37  | 5.07E-03 |
| cg20030671 | FBXO28    | 0.303 | 51  | 111 | 5.23E-03 |
| cg12346881 | ZNF300    | 0.832 | 44  | 118 | 5.36E-03 |
| cg08047457 | RASSF1    | 4.167 | 47  | 115 | 5.69E-03 |
| cg06938878 | CALCB     | 0.767 | 66  | 96  | 5.73E-03 |
| cg09828634 | KRTAP19-2 | 0.759 | 100 | 61  | 5.73E-03 |
| cg13003163 | ANP32D    | 0.467 | 71  | 91  | 5.73E-03 |
| cg23661676 | GPR42     | 0.414 | 51  | 111 | 5.73E-03 |
| cg07374637 | KRTAP19-5 | 0.926 | 86  | 76  | 5.88E-03 |
| cg06319346 | CHRFAM7A  | 0.454 | 78  | 84  | 6.13E-03 |
| cg06590610 | ZNFN1A1   | 0.331 | 106 | 56  | 6.13E-03 |
| cg13135180 | RPP21     | 0.130 | 99  | 63  | 6.13E-03 |
| cg06353345 | OR51B4    | 0.648 | 116 | 46  | 6.34E-03 |
| cg08525207 | RPS7      | 0.177 | 98  | 64  | 6.34E-03 |
| cg10095719 | NRP1      | 0.767 | 30  | 132 | 6.34E-03 |
| cg12274479 | HSPG2     | 1.121 | 15  | 145 | 6.34E-03 |
| cg13447818 | FLG       | 0.307 | 128 | 34  | 6.34E-03 |
| cg15484375 | SAA1      | 0.942 | 59  | 103 | 6.34E-03 |
| cg16404106 | FLJ23514  | 1.919 | 53  | 109 | 6.34E-03 |
| cg16950012 | ATG5      | 0.356 | 50  | 112 | 6.34E-03 |
| cg24423088 | KRTAP8-1  | 1.483 | 124 | 38  | 6.34E-03 |
| cg24693053 | MFSD7     | 0.956 | 38  | 124 | 6.34E-03 |
| cg25241845 | NEURL2    | 0.129 | 128 | 34  | 6.34E-03 |
| cg25839766 | PSG1      | 0.522 | 89  | 73  | 6.40E-03 |
| cg07745725 | PSG3      | 0.683 | 78  | 84  | 6.44E-03 |
| cg16785344 | PXN       | 0.015 | 160 | 2   | 6.44E-03 |
| cg22927153 | MAP2K5    | 0.007 | 161 | 1   | 6.44E-03 |
| cg23619829 | MTFR1     | 0.004 | 161 | 1   | 6.44E-03 |
| cg26450541 | ZNF187    | 0.716 | 14  | 148 | 6.44E-03 |
| cg05810550 | DEFB106A  | 0.417 | 128 | 34  | 6.50E-03 |
| cg16612699 | OR8B8     | 0.677 | 90  | 72  | 6.50E-03 |
| cg14544583 | HBB       | 1.402 | 74  | 88  | 6.51E-03 |
| cg20824576 | CD47      | 0.213 | 110 | 52  | 6.54E-03 |
| cg13897627 | FLJ44674  | 1.245 | 78  | 84  | 6.65E-03 |
| cg08947964 | CX62      | 0.374 | 104 | 58  | 7.17E-03 |
| cg00704310 | KCTD15    | 0.085 | 128 | 34  | 7.23E-03 |
| cg21909391 | FLJ42393  | 1.339 | 53  | 109 | 7.35E-03 |
| cg02721374 | OR1D2     | 0.957 | 71  | 91  | 7.36E-03 |
| cg08742106 | USP6      | 0.554 | 109 | 53  | 7.36E-03 |
| cg27067618 | CYP4F3    | 0.294 | 132 | 30  | 7.36E-03 |
| cg25002911 | RB1       | 0.405 | 74  | 88  | 7.37E-03 |
| cg13179915 | KCNK7     | 0.792 | 81  | 81  | 7.37E-03 |
| cg18221897 | KIR2DL1   | 0.584 | 83  | 79  | 7.48E-03 |
| cg04901273 | TBC1D3    | 0.844 | 57  | 105 | 7.65E-03 |
| cg05480532 | TMPRSS11A | 0.233 | 80  | 82  | 7.65E-03 |
| cg10277781 | CNIH      | 0.038 | 150 | 12  | 7.65E-03 |
| cg11248491 | PSCD3     | 0.013 | 157 | 5   | 7.65E-03 |
| cg21979032 | CYP8B1    | 0.141 | 136 | 26  | 7.65E-03 |
| cg02677802 | ITPR2     | 0.240 | 102 | 60  | 7.72E-03 |
| cg05440289 | IVL       | 1.601 | 82  | 80  | 7.72E-03 |
| cg12445208 | ZNF583    | 0.559 | 48  | 114 | 7.72E-03 |
| cg14620221 | OR8B8     | 0.479 | 115 | 47  | 7.72E-03 |
| cg07592353 | GABRA6    | 0.353 | 87  | 75  | 7.78E-03 |
| cg17177829 | ATF5      | 0.179 | 110 | 52  | 7.78E-03 |
| cg14026602 | USP7      | 0.185 | 88  | 74  | 7.80E-03 |

|            |                  |       |     |     |          |
|------------|------------------|-------|-----|-----|----------|
| cg03156547 | <i>CDH24</i>     | 0.297 | 84  | 78  | 7.87E-03 |
| cg17918700 | <i>KCNK7</i>     | 0.205 | 96  | 66  | 8.00E-03 |
| cg14930396 | <i>SF3B14</i>    | 0.226 | 66  | 96  | 8.24E-03 |
| cg06324671 | <i>KRTAP19-7</i> | 0.824 | 94  | 68  | 8.29E-03 |
| cg06276653 | <i>C8ORFK32</i>  | 0.802 | 76  | 86  | 8.63E-03 |
| cg09174741 | <i>THSD1</i>     | 0.517 | 64  | 98  | 8.83E-03 |
| cg01407341 | <i>SPATA8</i>    | 0.446 | 74  | 88  | 8.88E-03 |
| cg17642353 | <i>PSG6</i>      | 0.214 | 80  | 82  | 8.88E-03 |
| cg11828089 | <i>CALN1</i>     | 0.963 | 62  | 100 | 9.44E-03 |
| cg12339029 | <i>MYL1</i>      | 0.637 | 72  | 90  | 9.44E-03 |
| cg07092725 | <i>KCNH5</i>     | 0.493 | 115 | 47  | 9.64E-03 |
| cg09404334 | <i>SNX14</i>     | 0.518 | 27  | 135 | 9.67E-03 |

---

<sup>a</sup>Probe IDs for the Infinium HumanMethylation27 BeadChip (Illumina).

Supplementary Table 5A. The 9,583 probes showing significant differences in DNA methylation levels between adjacent normal lung tissue (N) samples and tumorous tissue (T) samples from patients belonging to the EGFR mutation group.

| Probe ID <sup>a</sup> | Chromosome | Position <sup>b</sup> | Gene symbol | M-values (mean±SD) |              | FDR, q   |
|-----------------------|------------|-----------------------|-------------|--------------------|--------------|----------|
|                       |            |                       |             | N                  | T            |          |
| cg25720804            | 5          | 170736389             | TLX3        | -2.882±0.617       | 0.604±0.776  | 1.52E-53 |
| cg26521404            | 7          | 27204981              | HOXA9       | -2.426±0.72        | 0.771±0.573  | 2.61E-53 |
| cg07533148            | 1          | 248020812             | TRIM58      | -4.234±0.932       | -0.025±0.958 | 3.35E-50 |
| cg15748507            | 10         | 120354627             | PRLHR       | -1.065±0.361       | 0.673±0.474  | 6.75E-45 |
| cg27009703            | 7          | 27204894              | HOXA9       | -0.845±0.331       | 0.769±0.459  | 2.17E-43 |
| cg27409364            | 11         | 17757743              | KCNC1       | -0.692±0.403       | 0.86±0.418   | 9.97E-43 |
| cg01683883            | 16         | 66613053              | CMTM2       | -1.918±0.486       | 0.74±0.781   | 4.02E-42 |
| cg11935147            | 1          | 145075831             | PDE4DIP     | -2.008±0.269       | 0.088±0.592  | 7.68E-42 |
| cg02510853            | 16         | 3031707               | PKMYT1      | -0.573±0.262       | 0.855±0.427  | 1.97E-41 |
| cg02919422            | 8          | 55370544              | SOX17       | -2.014±0.437       | -0.037±0.604 | 1.31E-40 |
| cg25942450            | 5          | 170736251             | TLX3        | -2.633±0.417       | -0.028±0.789 | 2.17E-40 |
| cg04057858            | 8          | 10383763              | PRSS55      | 1.37±0.316         | -0.047±0.444 | 1.05E-39 |
| cg19466563            | 4          | 88450506              | SPARCL1     | -1.117±0.352       | 0.528±0.519  | 1.53E-39 |
| cg24441911            | 12         | 7280988               | RBP5        | 1.402±0.303        | 2.651±0.4    | 1.37E-38 |
| cg02245378            | 2          | 223161771             | CCDC140     | -2.587±0.237       | -0.144±0.721 | 1.44E-38 |
| cg18555440            | 11         | 17741687              | MYOD1       | -2.581±0.48        | -0.38±0.72   | 3.64E-38 |
| cg03336167            | 11         | 2930995               | SLC22A18    | -0.267±0.501       | 1.903±0.718  | 1.18E-37 |
| cg09325711            | 7          | 39662764              | RALA        | -2.368±0.339       | -4.168±0.599 | 2.09E-37 |
| cg27549944            | 1          | 204328843             | PLEKHA6     | -2.529±0.285       | -0.134±0.754 | 2.38E-37 |
| cg10896774            | 7          | 142636840             | C7orf34     | -1.213±0.29        | -2.543±0.445 | 2.42E-37 |
| cg18343862            | 11         | 10590003              | LYVE1       | 1.888±0.291        | 2.822±0.274  | 2.61E-37 |
| cg01354473            | 7          | 27204803              | HOXA9       | -2.366±0.397       | 0.243±0.857  | 4.59E-37 |
| cg17518825            | 2          | 46523461              | EPAS1       | -0.48±0.287        | 0.617±0.365  | 6.24E-37 |
| cg26799474            | 2          | 202098951             | CASP8       | 0.768±0.377        | -1.157±0.652 | 6.96E-37 |
| cg07651914            | 7          | 100881986             | CLDN15      | 0.818±0.232        | 1.764±0.32   | 9.77E-37 |
| cg23587449            | 4          | 155663689             | LRAT        | -3.282±0.432       | -0.554±0.91  | 1.04E-36 |
| cg12127282            | 2          | 177014685             | MIR10B      | -1.659±0.342       | 0.585±0.753  | 2.47E-36 |
| cg08109815            | 6          | 142409831             | NMBR        | -1.426±0.295       | 0±0.492      | 2.55E-36 |
| cg14287742            | 1          | 169335773             | NME7        | 1.426±0.374        | 2.858±0.487  | 2.62E-36 |
| cg01280080            | 2          | 216177276             | ATIC        | -1.438±0.327       | -3.04±0.555  | 3.51E-36 |
| cg12111714            | 13         | 26043472              | ATP8A2      | -1.717±0.37        | 0.558±0.777  | 5.16E-36 |
| cg24407065            | 1          | 169335802             | NME7        | 1.535±0.376        | 2.677±0.338  | 7.04E-36 |
| cg00767581            | 2          | 177015125             | MIR10B      | -1.766±0.397       | 0.567±0.805  | 7.78E-36 |
| cg26626042            | 6          | 32151594              | AGER        | 1.338±0.308        | 2.334±0.32   | 9.31E-36 |
| cg06194808            | 7          | 1596217               | TMEM184A    | 1.567±0.376        | -0.827±0.822 | 1.11E-35 |
| cg14333454            | 1          | 27189298              | SFN         | 0.081±0.401        | -1.325±0.476 | 1.13E-35 |
| cg04947157            | 17         | 76128481              | TMC6        | 0.422±0.373        | -1.388±0.639 | 1.47E-35 |
| cg15781838            | 2          | 128422717             | LIMS2       | 1.538±0.324        | 2.573±0.335  | 1.77E-35 |
| cg06615154            | 1          | 153522553             | S100A3      | 0.715±0.241        | 1.964±0.443  | 3.13E-35 |
| cg13323752            | 12         | 8025567               | SLC2A14     | -4.261±0.692       | -0.928±1.196 | 5.83E-35 |
| cg19797376            | 1          | 47695475              | TAL1        | -2.383±0.274       | -0.145±0.761 | 5.83E-35 |
| cg09082287            | 1          | 65730494              | DNAJC6      | -2.141±0.447       | 0.341±0.886  | 8.25E-35 |
| cg22660578            | 17         | 35294029              | LHX1        | -2.67±0.617        | 0.018±0.973  | 1.07E-34 |
| cg23095584            | 2          | 237077704             | GBX2        | -2.44±0.394        | -0.492±0.705 | 1.26E-34 |
| cg17063929            | 11         | 89224799              | NOX4        | -2.128±0.326       | 0.179±0.808  | 1.39E-34 |
| cg02254407            | 11         | 73357159              | PLEKHB1     | 0.71±0.268         | 1.986±0.464  | 1.41E-34 |
| cg20644981            | 4          | 152020400             | RPS3A       | -2.142±0.363       | -3.533±0.502 | 1.81E-34 |
| cg18818531            | 11         | 65668277              | FOSL1       | -0.546±0.275       | -1.936±0.506 | 2.03E-34 |
| cg19979773            | 1          | 27702651              | FCN3        | 1.791±0.252        | 2.776±0.357  | 2.07E-34 |
| cg05521696            | 12         | 8025495               | SLC2A14     | -2.514±0.434       | -0.28±0.813  | 2.19E-34 |
| cg04228042            | 12         | 14996527              | ART4        | 0.525±0.31         | 1.792±0.463  | 2.39E-34 |
| cg05859264            | 6          | 36097692              | MAPK13      | 0.247±0.302        | -1.049±0.475 | 2.54E-34 |
| cg22346765            | 6          | 41007522              | UNC5CL      | 1.712±0.269        | -0.049±0.628 | 2.55E-34 |
| cg27626299            | 7          | 27282431              | EVX1        | -3.036±0.279       | -0.529±0.862 | 2.70E-34 |
| cg25072962            | 11         | 60524575              | MS4A15      | 1.059±0.237        | -0.421±0.531 | 2.76E-34 |
| cg15842276            | 11         | 92702648              | MTNR1B      | -0.626±0.342       | 0.858±0.55   | 6.21E-34 |
| cg09061733            | 11         | 57364841              | SERPING1    | -0.842±0.335       | 0.907±0.646  | 7.66E-34 |
| cg24335895            | 19         | 36643771              | COX7A1      | -1.019±0.406       | 0.469±0.55   | 1.61E-33 |
| cg05350879            | 4          | 88451223              | SPARCL1     | 0.399±0.311        | 1.574±0.438  | 1.97E-33 |
| cg14056644            | 4          | 111559105             | PITX2       | -1.775±0.341       | 0.198±0.731  | 1.98E-33 |
| cg17241310            | 1          | 91182856              | BARHL2      | -2.695±0.69        | -0.169±0.938 | 2.09E-33 |
| cg10275770            | 17         | 62084205              | ICAM2       | -0.562±0.235       | 0.718±0.478  | 2.28E-33 |
| cg13699808            | 20         | 45985339              | ZMYND8      | -0.985±0.33        | -2.472±0.561 | 2.44E-33 |
| cg23213217            | 1          | 224370155             | DEGS1       | 0.237±0.327        | -1.43±0.627  | 2.55E-33 |
| cg12467090            | 1          | 204459139             | PIK3C2B     | 1.097±0.2          | 2.108±0.38   | 2.59E-33 |
| cg11004890            | 20         | 3218500               | SLC4A11     | -1.45±0.317        | 0.304±0.656  | 2.64E-33 |

|            |    |           |                 |              |              |          |
|------------|----|-----------|-----------------|--------------|--------------|----------|
| cg08251399 | 2  | 31457608  | <i>EHD3</i>     | -0.234±0.203 | 0.803±0.391  | 3.51E-33 |
| cg18081258 | 14 | 21494161  | <i>NDRG2</i>    | -1.078±0.305 | 0.511±0.599  | 3.68E-33 |
| cg09784259 | 1  | 169703422 | <i>SELE</i>     | 0.903±0.288  | 1.977±0.398  | 4.36E-33 |
| cg15540820 | 3  | 27765283  | <i>EOMES</i>    | -3.2±0.375   | -0.525±0.985 | 6.19E-33 |
| cg00446235 | 1  | 161008644 | <i>TSTD1</i>    | -1.176±0.417 | -2.94±0.678  | 1.06E-32 |
| cg19317715 | 17 | 40996578  | <i>AOC2</i>     | -0.894±0.308 | 0.476±0.529  | 1.44E-32 |
| cg19456540 | 14 | 60976285  | <i>SIX6</i>     | -4.372±0.669 | -0.757±1.384 | 1.61E-32 |
| cg06005396 | 19 | 590541    | <i>HCN2</i>     | -3.815±0.562 | -1.601±0.855 | 1.78E-32 |
| cg11172423 | 1  | 43205623  | <i>CLDN19</i>   | 1.014±0.268  | 2.56±0.591   | 2.10E-32 |
| cg14456683 | 3  | 147127010 | <i>ZIC1</i>     | -1.473±0.319 | 0.128±0.62   | 2.67E-32 |
| cg19352038 | 2  | 223164869 | <i>PAX3</i>     | -1.817±0.284 | 0.254±0.779  | 3.50E-32 |
| cg01242619 | 8  | 145049472 | <i>PLEC</i>     | -1.804±0.36  | -2.96±0.435  | 5.82E-32 |
| cg05050341 | 9  | 130617534 | <i>ENG</i>      | 0.213±0.265  | 1.094±0.336  | 5.82E-32 |
| cg07086380 | 5  | 118691033 | <i>TNFAIP8</i>  | 1.068±0.27   | -0.362±0.558 | 6.00E-32 |
| cg08118311 | 18 | 76740401  | <i>SALL3</i>    | -3.266±0.743 | -0.668±1.005 | 6.15E-32 |
| cg01335367 | 12 | 110172208 | <i>FAM222A</i>  | -2.415±0.358 | 0.106±0.959  | 6.39E-32 |
| cg21245652 | 2  | 95691051  | <i>MAL</i>      | -1.538±0.219 | -0.076±0.559 | 6.51E-32 |
| cg10368842 | 10 | 115511504 | <i>PLEKHS1</i>  | 1.061±0.37   | -0.838±0.745 | 7.17E-32 |
| cg27560864 | 11 | 118024339 | <i>SCN4B</i>    | -1.194±0.191 | 0.15±0.512   | 7.22E-32 |
| cg12782180 | 7  | 127880932 | <i>LEP</i>      | -0.442±0.362 | 1.095±0.609  | 9.57E-32 |
| cg26388152 | 17 | 27944453  | <i>CORO6</i>    | -1.618±0.457 | -3.748±0.846 | 1.28E-31 |
| cg07403255 | 2  | 114036170 | <i>PAX8</i>     | 0.281±0.189  | 1.059±0.31   | 1.38E-31 |
| cg17214107 | 4  | 123747542 | <i>FGF2</i>     | -2.343±0.363 | -0.734±0.642 | 1.61E-31 |
| cg18952647 | 15 | 83953744  | <i>BNC1</i>     | -4.016±0.562 | -0.986±1.197 | 1.62E-31 |
| cg25298754 | 3  | 111314102 | <i>ZBED2</i>    | -0.058±0.254 | -1.416±0.537 | 1.67E-31 |
| cg17706173 | 16 | 1582581   | <i>TMEM204</i>  | -0.555±0.317 | 0.772±0.53   | 1.72E-31 |
| cg10078415 | 16 | 20775011  | <i>ACSM3</i>    | -1.742±0.309 | -2.874±0.45  | 2.11E-31 |
| cg04534765 | 18 | 74962369  | <i>GALR1</i>    | -3.3±0.834   | -0.366±1.157 | 2.12E-31 |
| cg11450827 | 22 | 19513006  | <i>CLDN5</i>    | 0.286±0.317  | 1.583±0.52   | 2.40E-31 |
| cg21233722 | 5  | 169064660 | <i>DOCK2</i>    | -1.814±0.288 | 0±0.711      | 2.40E-31 |
| cg01770232 | 7  | 22766155  | <i>IL6</i>      | -1.042±0.363 | -2.496±0.583 | 2.42E-31 |
| cg15387123 | 9  | 139891058 | <i>CLIC3</i>    | -0.618±0.31  | -2.238±0.646 | 2.69E-31 |
| cg06958537 | 21 | 40176950  | <i>ETS2</i>     | -1.429±0.335 | -2.666±0.494 | 2.74E-31 |
| cg12374721 | 17 | 46799640  | <i>PRAC</i>     | -2.943±0.429 | 0.329±1.262  | 2.92E-31 |
| cg27120999 | 14 | 65008050  | <i>HSPA2</i>    | -0.857±0.561 | 1.311±0.87   | 2.99E-31 |
| cg23033845 | 17 | 7758662   | <i>TMEM88</i>   | 1.374±0.257  | 2.423±0.422  | 3.09E-31 |
| cg19537511 | 17 | 8213813   | <i>ARHGEF15</i> | -0.849±0.339 | 0.611±0.588  | 3.27E-31 |
| cg04081402 | 22 | 31003587  | <i>TCN2</i>     | 1.165±0.325  | 2.428±0.508  | 3.56E-31 |
| cg00411097 | 7  | 1596050   | <i>TMEM184A</i> | 0.055±0.24   | -1.07±0.454  | 3.71E-31 |
| cg08191854 | 21 | 45773294  | <i>TRPM2</i>    | -1.695±0.417 | -3.568±0.758 | 4.47E-31 |
| cg15998761 | 2  | 191300784 | <i>MFSD6</i>    | 0.88±0.277   | 1.791±0.355  | 5.09E-31 |
| cg10660256 | 5  | 78407683  | <i>BHMT</i>     | -2.559±0.443 | -0.145±0.968 | 5.25E-31 |
| cg12564453 | 16 | 56995840  | <i>CETP</i>     | 0.918±0.278  | 2.281±0.552  | 5.99E-31 |
| cg23640701 | 12 | 52301634  | <i>ACVRL1</i>   | 0.575±0.314  | 1.975±0.569  | 6.15E-31 |
| cg11946503 | 5  | 134870514 | <i>NEUROG1</i>  | -2.748±0.333 | -0.897±0.745 | 7.07E-31 |
| cg06910100 | 19 | 17375091  | <i>USHBP1</i>   | 1.251±0.277  | 2.395±0.466  | 7.70E-31 |
| cg05337441 | 2  | 21266568  | <i>APOB</i>     | -1.197±0.325 | -2.453±0.513 | 9.93E-31 |
| cg06491116 | 11 | 118122715 | <i>MPZL3</i>    | -1.49±0.348  | -2.919±0.586 | 1.20E-30 |
| cg08089301 | 17 | 46655561  | <i>HOXB4</i>    | -3.654±0.467 | 0.012±1.444  | 1.45E-30 |
| cg26252167 | 6  | 110300573 | <i>GPR6</i>     | -3.045±0.58  | -0.998±0.833 | 1.52E-30 |
| cg20855565 | 1  | 248020350 | <i>TRIM58</i>   | -4.079±0.458 | -1.494±1.052 | 1.96E-30 |
| cg07778029 | 7  | 27205114  | <i>HOXA9</i>    | -3.502±0.413 | -1.011±1.01  | 2.15E-30 |
| cg02351381 | 12 | 110172346 | <i>FAM222A</i>  | -1.592±0.335 | 0.243±0.751  | 2.45E-30 |
| cg04123507 | 12 | 52695270  | <i>KRT86</i>    | 0.41±0.318   | 1.872±0.605  | 2.55E-30 |
| cg14732540 | 1  | 92414722  | <i>BRDT</i>     | 0.167±0.293  | -1.135±0.541 | 3.31E-30 |
| cg01152019 | 2  | 177015044 | <i>MIR10B</i>   | -3.326±0.508 | -0.789±1.051 | 3.71E-30 |
| cg26416466 | 15 | 66546708  | <i>MEGF11</i>   | -3.259±0.517 | -0.649±1.081 | 3.73E-30 |
| cg06722633 | 1  | 37499309  | <i>GRIK3</i>    | -2.955±0.583 | -0.588±0.986 | 3.86E-30 |
| cg21591742 | 2  | 176980998 | <i>HOXD10</i>   | -2.402±0.342 | -0.709±0.702 | 3.89E-30 |
| cg02994956 | 22 | 29876534  | <i>NEFH</i>     | -0.909±0.382 | 0.428±0.551  | 3.96E-30 |
| cg22858288 | 11 | 2930322   | <i>SLC22A18</i> | 0.594±0.314  | 1.865±0.53   | 3.98E-30 |
| cg27091787 | 3  | 50360690  | <i>HYAL2</i>    | -0.685±0.284 | 0.297±0.404  | 4.07E-30 |
| cg23130254 | 2  | 176964588 | <i>HOXD12</i>   | -2.984±0.473 | -0.739±0.935 | 4.19E-30 |
| cg04907257 | 5  | 7395318   | <i>ADCY2</i>    | -2.068±0.397 | -0.433±0.683 | 4.49E-30 |
| cg13676215 | 7  | 17337976  | <i>AHR</i>      | -0.348±0.218 | -1.641±0.531 | 4.76E-30 |
| cg22341310 | 19 | 48048583  | <i>ZNF541</i>   | -1.489±0.666 | 0.48±0.775   | 4.78E-30 |
| cg02806777 | 19 | 46526317  | <i>PGLYRP1</i>  | -0.87±0.541  | 0.798±0.669  | 4.97E-30 |
| cg01091565 | 15 | 90294762  | <i>MESP1</i>    | 2.284±0.263  | 0.82±0.606   | 5.88E-30 |
| cg21115990 | 11 | 68079081  | <i>LRP5</i>     | 0.639±0.244  | 1.628±0.415  | 5.89E-30 |
| cg02131853 | 4  | 39034637  | <i>TMEM156</i>  | -0.066±0.38  | -1.303±0.506 | 6.10E-30 |

|            |    |           |            |              |              |          |
|------------|----|-----------|------------|--------------|--------------|----------|
| cg16361890 | 5  | 179220545 | LTC4S      | -0.821±0.192 | 0.301±0.464  | 6.70E-30 |
| cg15430659 | 10 | 101090558 | CNNM1      | 0.614±0.362  | 1.712±0.44   | 6.80E-30 |
| cg20903926 | 1  | 55271677  | C1orf177   | 1.883±0.474  | 3.386±0.612  | 6.89E-30 |
| cg00911351 | 5  | 140767255 | PCDHGB4    | -2.528±0.349 | -0.739±0.748 | 7.32E-30 |
| cg25509184 | 7  | 117119382 | CFTR       | -2.188±0.463 | 0.019±0.927  | 8.04E-30 |
| cg26530341 | 8  | 23083353  | LOC389641  | 1.724±0.408  | -0.061±0.753 | 8.78E-30 |
| cg03421300 | 1  | 27189787  | SFN        | 2.753±0.514  | 0.699±0.867  | 9.30E-30 |
| cg02189785 | 9  | 139891008 | CLIC3      | -1.341±0.314 | -2.961±0.68  | 9.82E-30 |
| cg08647446 | 4  | 74486298  | RASSF6     | -1.981±0.278 | -2.987±0.423 | 1.00E-29 |
| cg07195577 | 17 | 27052828  | TLCD1      | -1.877±0.475 | -3.632±0.741 | 1.34E-29 |
| cg13153865 | 8  | 90914101  | OSGIN2     | -2.941±0.322 | -4.049±0.464 | 1.38E-29 |
| cg09619146 | 10 | 125651034 | CPXM2      | -1.287±0.333 | 0.196±0.63   | 1.40E-29 |
| cg12880658 | 5  | 115152386 | CDO1       | -4.741±0.585 | -1.658±1.298 | 1.40E-29 |
| cg17166338 | 5  | 1295969   | TERT       | 0.687±0.278  | 1.969±0.545  | 1.67E-29 |
| cg26316946 | 6  | 101846967 | GRIK2      | -2.478±0.311 | -0.235±0.924 | 1.77E-29 |
| cg00548268 | 7  | 98245830  | NPTX2      | -0.882±0.353 | 0.726±0.685  | 1.80E-29 |
| cg27214774 | 20 | 49253710  | FAM65C     | 0.433±0.324  | 1.772±0.571  | 1.84E-29 |
| cg05755779 | 8  | 120079625 | COLEC10    | 1.073±0.365  | 2.355±0.542  | 1.95E-29 |
| cg10236239 | 2  | 108994514 | SULT1C4    | -1.52±0.297  | -0.073±0.615 | 2.05E-29 |
| cg06640279 | 1  | 207095153 | FAIM3      | -0.871±0.34  | -2.128±0.535 | 2.17E-29 |
| cg18702197 | 2  | 177027641 | HOXD3      | -2.864±0.51  | -0.436±1.035 | 2.33E-29 |
| cg04726200 | 11 | 2930485   | SLC22A18   | 0.468±0.26   | 1.531±0.455  | 2.55E-29 |
| cg01381846 | 7  | 27204785  | HOXA9      | -1.655±0.358 | 0.474±0.898  | 2.85E-29 |
| cg27285056 | 19 | 50868879  | NAPSA      | 0.439±0.242  | -0.673±0.476 | 2.90E-29 |
| cg10238818 | 21 | 27945554  | CYYR1      | -3.397±0.536 | -1.097±0.988 | 3.02E-29 |
| cg21604615 | 1  | 27668610  | SYTL1      | -0.615±0.343 | -2.399±0.761 | 3.31E-29 |
| cg04396791 | 11 | 70508180  | SHANK2     | -1.01±0.259  | 0.313±0.566  | 3.54E-29 |
| cg08319404 | 3  | 24537435  | THRB       | -0.033±0.294 | -1.334±0.56  | 3.56E-29 |
| cg03874199 | 2  | 176964456 | HOXD12     | -3.895±0.476 | -1.364±1.079 | 3.56E-29 |
| cg04048259 | 20 | 57875346  | EDN3       | -3.328±0.625 | -0.724±1.122 | 3.81E-29 |
| cg03177025 | 2  | 28112917  | RBKS       | -1.612±0.419 | -2.822±0.491 | 3.91E-29 |
| cg18043280 | 17 | 40996886  | AOC2       | 2.079±0.273  | 3.158±0.465  | 3.93E-29 |
| cg15664905 | 19 | 44009429  | PHLDB3     | 0.475±0.261  | 1.26±0.324   | 3.94E-29 |
| cg25047280 | 7  | 27205479  | HOXA9      | -2.266±0.331 | -0.18±0.882  | 4.62E-29 |
| cg26128092 | 1  | 3567550   | WRAP73     | -3.039±0.506 | -0.762±0.984 | 4.94E-29 |
| cg21747271 | 11 | 67250052  | AIP        | -0.14±0.318  | -1.703±0.673 | 5.40E-29 |
| cg13530946 | 1  | 220266799 | IARS2      | 0.469±0.298  | 1.454±0.415  | 6.29E-29 |
| cg09060914 | 1  | 169599558 | SELP       | 0.124±0.279  | 1.31±0.515   | 7.00E-29 |
| cg11532513 | 3  | 54962242  | LRTM1      | 1.451±0.397  | 2.548±0.439  | 7.11E-29 |
| cg23317501 | 5  | 35991215  | UGT3A1     | -2.868±0.368 | -0.935±0.833 | 7.34E-29 |
| cg15988232 | 3  | 47621127  | CSPG5      | -0.5±0.315   | 0.929±0.622  | 7.98E-29 |
| cg24921858 | 12 | 12223989  | BCL2L14    | -0.448±0.338 | -1.636±0.513 | 8.52E-29 |
| cg00662556 | 18 | 74963364  | GALR1      | -1.979±0.388 | -0.394±0.692 | 9.23E-29 |
| cg18722841 | 11 | 71954982  | PHOX2A     | -4.181±0.519 | -1.567±1.136 | 1.01E-28 |
| cg24898753 | 11 | 61735917  | FBX1       | -0.814±0.36  | -2.563±0.761 | 1.01E-28 |
| cg04901273 | 17 | 34503359  | TBC1D3B    | 1.183±0.172  | 0.377±0.351  | 1.06E-28 |
| cg15701111 | 12 | 52685334  | KRT81      | 0.28±0.441   | 1.504±0.496  | 1.13E-28 |
| cg26575445 | 3  | 169756530 | GPR160     | -3.439±0.555 | -4.869±0.546 | 1.19E-28 |
| cg06409153 | 17 | 67323953  | ABCA5      | -1.66±0.25   | -2.627±0.423 | 1.23E-28 |
| cg14444710 | 16 | 2587080   | PDPK1      | 1.698±0.22   | 0.162±0.656  | 1.56E-28 |
| cg24240626 | 2  | 79386720  | REG3A      | 0.77±0.248   | -0.733±0.649 | 1.58E-28 |
| cg24323726 | 3  | 111314186 | ZBED2      | 0.856±0.234  | -0.396±0.545 | 1.61E-28 |
| cg19091641 | 16 | 21223674  | ZP2        | 1.441±0.24   | 2.143±0.29   | 1.64E-28 |
| cg26069745 | 7  | 27142200  | HOXA2      | -2.173±0.342 | -0.057±0.913 | 1.67E-28 |
| cg09879869 | 14 | 57734464  | AP5M1      | -1.027±0.341 | 0.202±0.529  | 1.67E-28 |
| cg16028753 | 1  | 53527435  | PODN       | -2.25±0.23   | -0.692±0.668 | 1.68E-28 |
| cg02332525 | 3  | 6903153   | GRM7       | -1.413±0.441 | -0.111±0.549 | 1.90E-28 |
| cg19863740 | 22 | 44576869  | PARVG      | 0.465±0.251  | -0.481±0.418 | 2.41E-28 |
| cg09871315 | 7  | 27142682  | HOXA2      | -2.613±0.434 | -0.131±1.083 | 2.48E-28 |
| cg07703401 | 16 | 230341    | HBQ1       | -3.532±0.509 | -0.673±1.25  | 2.66E-28 |
| cg19824441 | 12 | 57388312  | GPR182     | 0.59±0.218   | 1.435±0.374  | 2.72E-28 |
| cg10549973 | 14 | 58863097  | TOMM20L    | -1.329±0.35  | -3.047±0.758 | 2.72E-28 |
| cg17095936 | 1  | 168250628 | TBX19      | 2.513±0.365  | 3.387±0.307  | 2.73E-28 |
| cg13376158 | 17 | 73128023  | NT5C       | -3.914±0.396 | -5.045±0.474 | 2.75E-28 |
| cg27389185 | 19 | 38042123  | ZNF571-AS1 | -1.646±0.329 | -0.198±0.642 | 2.76E-28 |
| cg23207990 | 4  | 154710535 | SFRP2      | -3.288±0.445 | -0.826±1.08  | 3.03E-28 |
| cg12699371 | 18 | 74961424  | GALR1      | -3.542±0.359 | -1.31±0.971  | 3.04E-28 |
| cg26767897 | 2  | 31637348  | XDH        | 2.873±0.241  | 0.564±0.976  | 3.14E-28 |
| cg24423088 | 21 | 32185365  | KRTAP8-1   | 4.081±0.376  | 1.261±1.211  | 3.15E-28 |
| cg03567830 | 20 | 61339871  | NTSR1      | -2.724±0.601 | -0.708±0.885 | 3.29E-28 |

|            |    |           |                  |              |              |          |
|------------|----|-----------|------------------|--------------|--------------|----------|
| cg21504624 | 9  | 34653580  | <i>IL11RA</i>    | -1.465±0.282 | -0.396±0.475 | 3.40E-28 |
| cg23290344 | 8  | 24771466  | <i>NEFM</i>      | -3.243±0.73  | -0.438±1.248 | 3.77E-28 |
| cg24178740 | 2  | 219850465 | <i>FEV</i>       | -1.561±0.209 | -0.4±0.512   | 4.01E-28 |
| cg17525406 | 1  | 4715520   | <i>AJAP1</i>     | -3.389±0.587 | -0.462±1.3   | 4.43E-28 |
| cg24110050 | 1  | 67217853  | <i>TCTEX1D1</i>  | -4.136±0.313 | -1.307±1.208 | 4.79E-28 |
| cg23067535 | 8  | 124195133 | <i>FAM83A</i>    | 1.893±0.396  | -0.206±0.931 | 5.15E-28 |
| cg27188703 | 12 | 50297581  | <i>FAIM2</i>     | -1.828±0.383 | 0.747±1.127  | 6.27E-28 |
| cg14701962 | 1  | 162348010 | <i>C1orf226</i>  | 0.815±0.219  | 1.961±0.512  | 8.05E-28 |
| cg23595927 | 4  | 671851    | <i>MYL5</i>      | 1.086±0.356  | -0.583±0.75  | 8.20E-28 |
| cg03975694 | 19 | 38042472  | <i>ZNF540</i>    | -2.164±0.444 | -0.012±0.966 | 8.36E-28 |
| cg02309273 | 1  | 38412744  | <i>INPP5B</i>    | -2.902±0.466 | -0.337±1.143 | 8.80E-28 |
| cg21226224 | 8  | 55370171  | <i>SOX17</i>     | -1.807±0.374 | 0.4±0.98     | 9.12E-28 |
| cg15279364 | 7  | 98466963  | <i>TMEM130</i>   | -2.83±0.342  | -0.328±1.095 | 9.46E-28 |
| cg03958979 | 6  | 108486387 | <i>NR2E1</i>     | -1.589±0.394 | 0.645±0.995  | 9.52E-28 |
| cg25750259 | 20 | 43104962  | <i>TTPAL</i>     | -3.25±0.368  | -4.41±0.512  | 9.55E-28 |
| cg00936626 | 3  | 196694856 | <i>PIGZ</i>      | 0.041±0.307  | 0.974±0.408  | 9.55E-28 |
| cg02844545 | 6  | 10882043  | <i>GCM2</i>      | -1.31±0.303  | 0.321±0.73   | 9.98E-28 |
| cg00066816 | 5  | 158758353 | <i>LOC285626</i> | -1.299±0.26  | -2.317±0.46  | 1.08E-27 |
| cg24387380 | 15 | 27159158  | <i>GABRA5</i>    | 0.894±0.314  | -0.601±0.676 | 1.35E-27 |
| cg14652095 | 6  | 26018185  | <i>HIST1H1A</i>  | -0.08±0.281  | 1.436±0.682  | 1.52E-27 |
| cg05726109 | 22 | 19709755  | <i>GP1BB</i>     | 1.197±0.261  | 2.58±0.623   | 1.56E-27 |
| cg14726637 | 1  | 207669308 | <i>CR1</i>       | -1.873±0.267 | -0.118±0.78  | 1.63E-27 |
| cg25226247 | 6  | 50785152  | <i>TFAP2B</i>    | -2.116±0.367 | -0.175±0.865 | 1.83E-27 |
| cg23641264 | 8  | 143748641 | <i>JRK</i>       | 1.662±0.27   | 2.439±0.338  | 1.93E-27 |
| cg03934354 | 5  | 34043140  | <i>C1QTNF3</i>   | 0.965±0.268  | 1.834±0.39   | 1.93E-27 |
| cg24468890 | 1  | 32757294  | <i>HDAC1</i>     | -1.53±0.224  | -2.546±0.463 | 2.09E-27 |
| cg04304130 | 6  | 11111894  | <i>ERVFRD-1</i>  | 1.186±0.254  | 2.066±0.402  | 3.30E-27 |
| cg00891541 | 16 | 68481487  | <i>SMPD3</i>     | -0.193±0.373 | 1.444±0.752  | 3.33E-27 |
| cg22740835 | 1  | 162602559 | <i>DDR2</i>      | 0.333±0.289  | 1.7±0.629    | 4.40E-27 |
| cg06771126 | 4  | 57547699  | <i>HOPX</i>      | -0.944±0.377 | -2.195±0.571 | 4.45E-27 |
| cg20870559 | 12 | 113416518 | <i>OAS2</i>      | -1.369±0.435 | -2.951±0.728 | 4.55E-27 |
| cg23432345 | 7  | 27196153  | <i>HOXA7</i>     | -3.642±0.537 | -0.377±1.483 | 4.88E-27 |
| cg17349199 | 10 | 118429452 | <i>C10orf82</i>  | 0.413±0.292  | 1.744±0.614  | 4.89E-27 |
| cg07014174 | 21 | 32253760  | <i>KRTAP11-1</i> | 1.6±0.317    | -0.534±0.963 | 4.94E-27 |
| cg16773028 | 1  | 111148339 | <i>KCNA2</i>     | 0.254±0.258  | 1.305±0.486  | 5.11E-27 |
| cg16313343 | 14 | 105768109 | <i>BRF1</i>      | -1.55±0.402  | -3.002±0.67  | 5.32E-27 |
| cg07922606 | 6  | 26225389  | <i>HIST1H3E</i>  | 1.235±0.331  | 2.669±0.663  | 5.33E-27 |
| cg21410991 | 5  | 50678451  | <i>ISL1</i>      | -2.817±0.347 | -0.912±0.873 | 5.78E-27 |
| cg07221454 | 11 | 60552841  | <i>MS4A10</i>    | 2.661±0.237  | 3.431±0.352  | 5.85E-27 |
| cg19358493 | 10 | 119300942 | <i>EMX2</i>      | -3.568±0.357 | -1.191±1.077 | 6.17E-27 |
| cg09924998 | 12 | 122751933 | <i>VPS33A</i>    | -0.194±0.264 | -1.266±0.497 | 6.20E-27 |
| cg05023540 | 14 | 96116970  | <i>TCL6</i>      | 1.507±0.254  | 0.687±0.375  | 6.21E-27 |
| cg08441806 | 10 | 134599149 | <i>NKX6-2</i>    | -1.632±0.626 | -0.064±0.645 | 6.24E-27 |
| cg06766367 | 16 | 67062687  | <i>CBFB</i>      | -1.967±0.299 | -3.184±0.565 | 6.66E-27 |
| cg02173484 | 1  | 147245168 | <i>GJA5</i>      | -1.193±0.206 | 0.085±0.584  | 7.19E-27 |
| cg15913671 | 17 | 79304420  | <i>TMEM105</i>   | 0.403±0.25   | -0.882±0.593 | 7.20E-27 |
| cg01580681 | 4  | 174450016 | <i>HAND2</i>     | -2.188±0.365 | -0.225±0.905 | 7.46E-27 |
| cg16431978 | 21 | 31797932  | <i>KRTAP13-3</i> | 1.146±0.264  | -0.25±0.645  | 8.35E-27 |
| cg24194775 | 9  | 35791475  | <i>NPR2</i>      | -0.352±0.542 | 1.613±0.913  | 8.78E-27 |
| cg26705561 | 10 | 102279791 | <i>SEC31B</i>    | 0.648±0.187  | 1.543±0.416  | 9.21E-27 |
| cg12611860 | 11 | 17191617  | <i>PIK3C2A</i>   | 0.603±0.305  | 1.442±0.365  | 9.32E-27 |
| cg21301440 | 17 | 74534550  | <i>CYGB</i>      | -1.426±0.214 | -0.012±0.646 | 9.50E-27 |
| cg26304237 | 1  | 65730384  | <i>DNAJC6</i>    | -3.45±0.572  | -1.15±1.074  | 9.59E-27 |
| cg05261299 | 12 | 52437299  | <i>NR4A1</i>     | 1.511±0.357  | 2.687±0.543  | 1.00E-26 |
| cg21907579 | 12 | 114845868 | <i>TBX5-AS1</i>  | -3.51±0.528  | -1.225±1.068 | 1.00E-26 |
| cg00234616 | 2  | 74740572  | <i>TLX2</i>      | -1.591±0.42  | 0.283±0.878  | 1.37E-26 |
| cg23671708 | 17 | 7758291   | <i>TMEM88</i>    | 0.69±0.314   | 1.855±0.547  | 1.47E-26 |
| cg01281904 | 8  | 54164757  | <i>OPRK1</i>     | -0.252±0.329 | 1±0.588      | 1.51E-26 |
| cg07218880 | 13 | 115046279 | <i>UPF3A</i>     | -0.827±0.274 | -1.97±0.538  | 1.59E-26 |
| cg27090087 | 6  | 54172378  | <i>TINAG</i>     | -0.218±0.259 | -1.237±0.48  | 1.66E-26 |
| cg01110312 | 12 | 124116920 | <i>GTF2H3</i>    | -0.651±0.326 | 0.207±0.373  | 1.70E-26 |
| cg02164046 | 3  | 187388148 | <i>SST</i>       | -3.029±0.465 | -0.679±1.102 | 1.87E-26 |
| cg13870866 | 7  | 35293130  | <i>TBX20</i>     | -2.472±0.328 | -0.302±1.002 | 1.87E-26 |
| cg14399060 | 2  | 177015070 | <i>MIR10B</i>    | -3.015±0.442 | -0.86±1.014  | 2.09E-26 |
| cg25596297 | 2  | 223162875 | <i>CCDC140</i>   | -3.423±0.388 | -1.051±1.102 | 2.10E-26 |
| cg04268405 | 10 | 73723221  | <i>CHST3</i>     | 0.907±0.279  | 1.84±0.437   | 2.12E-26 |
| cg26050734 | 1  | 151689032 | <i>CELF3</i>     | -0.987±0.163 | 0.105±0.505  | 2.23E-26 |
| cg20972214 | 12 | 8088818   | <i>SLC2A3</i>    | -4.254±0.518 | -1.387±1.345 | 2.74E-26 |
| cg23710218 | 8  | 72756656  | <i>MSC</i>       | -1.991±0.235 | -0.151±0.848 | 3.19E-26 |
| cg18401406 | 13 | 37247537  | <i>SERTM1</i>    | 0.972±0.292  | 1.926±0.448  | 3.32E-26 |

|            |    |           |           |              |              |          |
|------------|----|-----------|-----------|--------------|--------------|----------|
| cg15852891 | 5  | 76934946  | OTP       | -4.554±0.5   | -2.296±1.076 | 4.23E-26 |
| cg25388528 | 21 | 31987978  | KRTAP20-1 | 1.141±0.285  | -0.535±0.778 | 4.40E-26 |
| cg11204562 | 10 | 115511153 | PLEKHS1   | 2.445±0.36   | 0.46±0.938   | 4.43E-26 |
| cg18788940 | 11 | 20385085  | HTATIP2   | -0.396±0.164 | -1.417±0.48  | 5.11E-26 |
| cg11998307 | 17 | 1549434   | SCARF1    | 1.278±0.249  | 2.315±0.497  | 5.26E-26 |
| cg00534274 | 4  | 139163341 | SLC7A11   | -0.911±0.399 | -2.049±0.524 | 5.58E-26 |
| cg20822579 | 14 | 24809073  | RIPK3     | -2.332±0.444 | -3.667±0.624 | 5.65E-26 |
| cg08130265 | 15 | 77519170  | LINC00597 | -0.331±0.333 | 0.588±0.419  | 5.79E-26 |
| cg12869058 | 1  | 94587872  | ABCA4     | 1.248±0.388  | -0.208±0.698 | 5.96E-26 |
| cg13521229 | 19 | 51013630  | JOSD2     | 0.486±0.304  | 1.694±0.58   | 6.03E-26 |
| cg04272086 | 18 | 49867359  | DCC       | -3.455±0.425 | -1.574±0.903 | 6.62E-26 |
| cg04956511 | 12 | 7056008   | PTPN6     | 0.279±0.291  | -1.046±0.636 | 6.75E-26 |
| cg24724583 | 17 | 37307313  | PLXDC1    | -0.417±0.166 | 0.387±0.385  | 6.75E-26 |
| cg18533225 | 22 | 50986813  | KLHDC7B   | 0.065±0.316  | 1.486±0.683  | 6.90E-26 |
| cg10486998 | 18 | 74961787  | GALR1     | -3.364±0.483 | -0.974±1.144 | 6.96E-26 |
| cg05140736 | 17 | 78195518  | SGSH      | 1.147±0.252  | 1.949±0.38   | 7.09E-26 |
| cg15607672 | 14 | 57277227  | OTX2      | -1.928±0.226 | 0±0.897      | 7.34E-26 |
| cg10784030 | 1  | 38412688  | INPP5B    | -2.754±0.51  | -0.085±1.275 | 7.35E-26 |
| cg09936561 | 4  | 9783623   | DRD5      | -2.224±0.402 | -0.677±0.745 | 7.53E-26 |
| cg05556717 | 7  | 75419304  | CCL26     | -0.202±0.271 | 0.805±0.485  | 8.55E-26 |
| cg08744726 | 7  | 149323101 | ZNF767    | -0.404±0.201 | -1.46±0.507  | 1.03E-25 |
| cg00949442 | 16 | 2391828   | ABCA17P   | -3.207±0.542 | -0.29±1.4    | 1.06E-25 |
| cg20775254 | 2  | 95940705  | PROM2     | 1.414±0.215  | 0.189±0.586  | 1.09E-25 |
| cg25361106 | 2  | 74740746  | TLX2      | -3.15±0.475  | -0.931±1.075 | 1.34E-25 |
| cg20798152 | 5  | 71014900  | CARTPT    | -1.226±0.285 | -0.01±0.591  | 1.44E-25 |
| cg08369065 | 8  | 11562683  | GATA4     | -3.485±0.41  | -1.366±1.024 | 1.51E-25 |
| cg14183455 | 1  | 31196733  | MATN1     | 1.879±0.223  | 2.489±0.282  | 1.60E-25 |
| cg12554573 | 3  | 51976667  | PARP3     | 0.589±0.199  | -0.384±0.472 | 1.60E-25 |
| cg14757492 | 19 | 19029194  | COPE      | 1.442±0.229  | 0.233±0.585  | 1.67E-25 |
| cg24784109 | 6  | 26200116  | HIST1H2BF | -2.754±0.418 | -1.216±0.749 | 1.75E-25 |
| cg08314660 | 11 | 394199    | PKP3      | 1.997±0.369  | 0.952±0.492  | 1.97E-25 |
| cg25993718 | 20 | 54580196  | CBLN4     | -2.44±0.355  | -0.926±0.741 | 2.18E-25 |
| cg07104706 | 13 | 84456127  | SLITRK1   | -3.703±0.431 | -1.167±1.226 | 2.30E-25 |
| cg01656853 | 19 | 49199172  | FUT2      | -0.333±0.255 | -1.259±0.453 | 2.41E-25 |
| cg26218269 | 4  | 151503227 | MAB21L2   | 0.884±0.349  | 1.766±0.397  | 2.65E-25 |
| cg06760035 | 17 | 46655245  | HOXB4     | -4.297±0.675 | -0.692±1.758 | 3.00E-25 |
| cg14709481 | 5  | 176325836 | HK3       | 1.906±0.253  | 0.493±0.688  | 3.04E-25 |
| cg10217445 | 21 | 34397784  | OLIG2     | -3.012±0.343 | -1.253±0.86  | 3.06E-25 |
| cg03270167 | 2  | 238768916 | RAMP1     | -2.201±0.478 | -3.468±0.588 | 3.14E-25 |
| cg25645462 | 16 | 57653702  | GPR56     | 1.931±0.281  | 0.529±0.687  | 3.27E-25 |
| cg06363129 | 7  | 16505602  | SOSTDC1   | -0.737±0.362 | 0.72±0.718   | 3.44E-25 |
| cg15191648 | 18 | 76740262  | SALL3     | -2.494±0.755 | -0.338±1.028 | 3.68E-25 |
| cg02334775 | 15 | 89182676  | ISG20     | -0.464±0.287 | -1.385±0.45  | 3.88E-25 |
| cg24715245 | 4  | 41258794  | UCHL1-AS1 | -3.013±0.405 | -0.674±1.141 | 3.94E-25 |
| cg00005847 | 2  | 177029073 | HOXD3     | -1.851±0.311 | -0.197±0.811 | 4.11E-25 |
| cg05828624 | 2  | 79347699  | REG1A     | 2.462±0.255  | 0.802±0.806  | 4.24E-25 |
| cg22774472 | 2  | 190044636 | COL5A2    | -2.207±0.305 | -0.224±0.963 | 4.26E-25 |
| cg26656452 | 10 | 115313165 | HABP2     | 2.404±0.213  | 0.529±0.897  | 4.28E-25 |
| cg16428251 | 3  | 137483479 | SOX14     | -2.834±0.42  | -1.134±0.841 | 4.33E-25 |
| cg06714705 | 11 | 7506940   | OLFML1    | 0.759±0.243  | 1.769±0.5    | 4.34E-25 |
| cg13354523 | 12 | 10251574  | CLEC1A    | -0.022±0.295 | 1.349±0.677  | 4.34E-25 |
| cg25691167 | 7  | 19184961  | FERD3L    | -3.835±0.58  | -1.145±1.328 | 4.51E-25 |
| cg17496788 | 1  | 162601807 | DDR2      | 0.37±0.295   | 1.455±0.536  | 4.73E-25 |
| cg17347253 | 7  | 130130288 | MESTIT1   | -0.35±0.212  | 0.703±0.52   | 4.96E-25 |
| cg00221494 | 13 | 98794593  | FARP1     | -1.526±0.351 | -3.124±0.791 | 5.02E-25 |
| cg15164103 | 7  | 130126871 | MEST      | -0.976±0.275 | -1.858±0.434 | 6.17E-25 |
| cg27342801 | 2  | 79387273  | REG3A     | 2.173±0.258  | 0.346±0.888  | 6.21E-25 |
| cg18883209 | 22 | 44394601  | PARVB     | 0.626±0.305  | 1.46±0.396   | 6.58E-25 |
| cg07168556 | 17 | 48912483  | WFIKK2    | -0.733±0.423 | 0.81±0.767   | 6.60E-25 |
| cg13672342 | 2  | 96930546  | TMEM127   | -1.859±0.298 | -0.57±0.643  | 7.35E-25 |
| cg00466249 | 17 | 79269884  | SLC38A10  | 0.082±0.219  | -1.044±0.559 | 7.73E-25 |
| cg20366906 | 13 | 53422381  | PCDH8     | -1.952±0.332 | -0.358±0.793 | 7.76E-25 |
| cg07084163 | 5  | 36066783  | UGT3A2    | -2.206±0.301 | -0.693±0.751 | 7.76E-25 |
| cg09643544 | 19 | 9473696   | ZNF177    | -2.293±0.386 | -0.317±0.981 | 7.77E-25 |
| cg15127733 | 20 | 3713584   | HSPA12B   | -0.739±0.288 | 0.522±0.63   | 7.95E-25 |
| cg03082060 | 1  | 236680224 | LGALS8    | -0.136±0.285 | -1.144±0.502 | 8.26E-25 |
| cg17398613 | 21 | 43919853  | SLC37A1   | 1.861±0.415  | 3.102±0.607  | 8.54E-25 |
| cg16592658 | 19 | 4229887   | EBI3      | 0.689±0.297  | -0.577±0.633 | 8.91E-25 |
| cg24719984 | 12 | 82153464  | PPFIA2    | -2.692±0.343 | -1.125±0.784 | 9.70E-25 |
| cg02599464 | 6  | 27107097  | HIST1H4I  | -2.943±0.528 | -0.45±1.245  | 9.72E-25 |

|            |    |           |           |              |              |          |
|------------|----|-----------|-----------|--------------|--------------|----------|
| cg06531741 | 11 | 113775450 | HTR3B     | 0.548±0.402  | 1.842±0.641  | 1.02E-24 |
| cg22234962 | 1  | 155291297 | RUSC1     | -1.736±0.366 | -0.218±0.762 | 1.07E-24 |
| cg13348944 | 11 | 118047121 | SCN2B     | -1.319±0.312 | -0.037±0.643 | 1.07E-24 |
| cg14144305 | 11 | 44325960  | ALX4      | -3.32±0.511  | -1.327±1     | 1.09E-24 |
| cg22462235 | 1  | 226129481 | LEFTY2    | -0.334±0.278 | 0.815±0.577  | 1.10E-24 |
| cg06958829 | 17 | 48546118  | CHAD      | -0.78±0.371  | 1.094±0.936  | 1.15E-24 |
| cg21460081 | 17 | 46656012  | HOXB4     | -3.758±0.418 | -1.359±1.193 | 1.24E-24 |
| cg21614638 | 4  | 100737821 | DAPP1     | 0.241±0.397  | -1.377±0.815 | 1.31E-24 |
| cg19885761 | 5  | 175223646 | CPLX2     | -2.408±0.453 | -0.336±1.042 | 1.37E-24 |
| cg22243733 | 11 | 7506434   | OLFML1    | 0.786±0.171  | 1.419±0.319  | 1.52E-24 |
| cg07307078 | 18 | 12307630  | TUBB6     | -3.337±0.437 | -0.187±1.556 | 1.59E-24 |
| cg25659818 | 17 | 34431747  | CCL4      | 1.636±0.298  | 0.008±0.815  | 1.64E-24 |
| cg01353448 | 7  | 31726912  | PPP1R17   | -0.22±0.217  | 0.934±0.579  | 1.64E-24 |
| cg14642338 | 11 | 35547903  | PAMR1     | 0.242±0.306  | 1.266±0.515  | 1.78E-24 |
| cg14902389 | 2  | 99342685  | MGAT4A    | 1.059±0.261  | 1.903±0.422  | 1.79E-24 |
| cg14170423 | 11 | 64513809  | RASGRP2   | -2.401±0.222 | -1.01±0.693  | 1.79E-24 |
| cg08758850 | 9  | 127533554 | NR6A1     | -3.323±0.399 | -2.342±0.454 | 1.82E-24 |
| cg05067286 | 11 | 129686365 | TMEM45B   | -1.611±0.297 | -0.82±0.38   | 1.83E-24 |
| cg13247990 | 16 | 46782176  | MYLK3     | 1.528±0.171  | 2.188±0.334  | 1.85E-24 |
| cg13547644 | 1  | 229569608 | ACTA1     | -2.801±0.618 | -0.855±0.973 | 1.86E-24 |
| cg21815667 | 2  | 176993841 | HOXD8     | -3.389±0.277 | -1.409±0.982 | 1.91E-24 |
| cg22471346 | 17 | 10101473  | GAS7      | -4.512±0.969 | -1.227±1.655 | 1.95E-24 |
| cg27158867 | 11 | 537638    | LRRC56    | -2.72±0.363  | -3.721±0.488 | 2.06E-24 |
| cg12003230 | 21 | 44899139  | LINC00313 | 0.898±0.269  | 1.929±0.524  | 2.44E-24 |
| cg21280510 | 1  | 40137089  | NT5C1A    | -1.166±0.258 | -0.167±0.509 | 2.75E-24 |
| cg19007731 | 8  | 93107394  | RUNX1T1   | -0.982±0.274 | 0.277±0.641  | 2.92E-24 |
| cg22951794 | 11 | 6867280   | OR10A5    | 1.707±0.275  | 0.248±0.74   | 3.19E-24 |
| cg12953249 | 9  | 126118772 | CRB2      | 2.281±0.389  | 3.256±0.462  | 3.28E-24 |
| cg13179915 | 11 | 65362949  | KCNK7     | 2.6±0.289    | 1.684±0.463  | 3.29E-24 |
| cg12354377 | 10 | 62149557  | ANK3      | 1.352±0.349  | 2.358±0.5    | 3.53E-24 |
| cg00918005 | 2  | 79253210  | REG3G     | 2.025±0.247  | 0.507±0.766  | 3.60E-24 |
| cg15868302 | 1  | 47900327  | FOXD2-AS1 | -1.071±0.349 | 0.528±0.817  | 3.63E-24 |
| cg16009558 | 6  | 101846707 | GRIK2     | -3.594±0.446 | -1.233±1.199 | 3.67E-24 |
| cg20018806 | 11 | 59633874  | TCN1      | 1.31±0.225   | -0.002±0.666 | 4.29E-24 |
| cg15633390 | 4  | 99851211  | EIF4E     | -0.917±0.448 | -2.385±0.747 | 4.30E-24 |
| cg00948500 | 21 | 32006706  | KRTAP20-2 | 0.487±0.279  | -0.975±0.735 | 4.31E-24 |
| cg00935364 | 11 | 394607    | PKP3      | 0.955±0.227  | 0.377±0.278  | 4.36E-24 |
| cg14265075 | 1  | 157016521 | ARHGEF11  | -1.548±0.385 | -2.749±0.608 | 4.40E-24 |
| cg14449575 | 19 | 19373743  | HAPLN4    | -0.539±0.214 | 0.373±0.468  | 4.59E-24 |
| cg07536847 | 1  | 18957232  | PAX7      | -3.226±0.366 | -1.094±1.084 | 4.79E-24 |
| cg20910746 | 11 | 27062416  | BBOX1     | 0.679±0.254  | -0.557±0.632 | 4.80E-24 |
| cg17987660 | 8  | 96281909  | C8orf37   | -3.953±0.41  | -2.622±0.679 | 4.86E-24 |
| cg11525285 | 14 | 74706336  | VSX2      | -3.003±0.334 | -0.877±1.077 | 5.03E-24 |
| cg19686152 | 15 | 52121542  | TMOD3     | 0.09±0.164   | -0.716±0.413 | 5.45E-24 |
| cg12278770 | 1  | 32712780  | FAM167B   | -0.175±0.307 | 0.832±0.515  | 5.70E-24 |
| cg20023231 | 16 | 22825282  | HS3ST2    | -3.859±0.451 | -1.714±1.103 | 5.94E-24 |
| cg01680823 | 17 | 37822045  | TCAP      | 1.534±0.172  | 0.5±0.527    | 6.72E-24 |
| cg15979932 | 17 | 55980107  | CUEDC1    | 0.15±0.297   | -1.188±0.69  | 6.73E-24 |
| cg02250594 | 18 | 55103353  | ONECUT2   | -2.547±0.558 | -0.556±1.027 | 6.97E-24 |
| cg21243096 | 1  | 38511557  | POU3F1    | -2.831±0.609 | -1.187±0.816 | 7.37E-24 |
| cg13997435 | 1  | 153538406 | S100A2    | -1.228±0.312 | -2.511±0.664 | 7.38E-24 |
| cg22881914 | 14 | 52536147  | NID2      | -3.675±0.772 | -0.503±1.641 | 7.39E-24 |
| cg16404106 | 11 | 86085623  | CCDC81    | -1.644±0.342 | 0.095±0.896  | 7.59E-24 |
| cg15107670 | 11 | 32456759  | WT1       | -3.484±0.809 | -1.2±1.147   | 7.67E-24 |
| cg07441143 | 8  | 143824001 | SLURP1    | 0.999±0.247  | 0.163±0.431  | 7.93E-24 |
| cg01072821 | 8  | 10382165  | PRSS55    | 0.883±0.297  | -0.253±0.589 | 7.97E-24 |
| cg24426405 | 7  | 16844852  | AGR2      | -0.117±0.235 | -1.422±0.662 | 8.54E-24 |
| cg14086122 | 12 | 123921793 | RILPL2    | -0.28±0.215  | -1.213±0.484 | 8.77E-24 |
| cg19831077 | 7  | 151107924 | WDR86     | -0.539±0.296 | 0.693±0.64   | 8.77E-24 |
| cg07785936 | 2  | 133174635 | GPR39     | 1.033±0.221  | 0.005±0.533  | 9.12E-24 |
| cg21902327 | 12 | 4554786   | FGF6      | 1.505±0.247  | 0.277±0.635  | 9.14E-24 |
| cg15746620 | 19 | 14785849  | EMR3      | -0.998±0.344 | -2.053±0.54  | 9.19E-24 |
| cg04144788 | 1  | 40236420  | OXCT2     | -2.198±0.565 | -0.594±0.81  | 9.53E-24 |
| cg17998964 | 11 | 63655903  | MARK2     | -1.47±0.303  | -2.641±0.608 | 9.54E-24 |
| cg25033993 | 16 | 31022372  | STX1B     | -2.571±0.212 | -1.269±0.668 | 9.76E-24 |
| cg26721264 | 18 | 74961727  | GALR1     | -3.874±0.534 | -1.415±1.277 | 9.92E-24 |
| cg14153740 | 7  | 141957702 | PRSS58    | 1.915±0.218  | 0.188±0.877  | 9.92E-24 |
| cg10556064 | 16 | 68481489  | SMPD3     | -0.071±0.381 | 1.396±0.764  | 1.02E-23 |
| cg09432154 | 3  | 151034669 | GPR87     | 0.001±0.311  | -0.878±0.445 | 1.08E-23 |
| cg07658590 | 21 | 46963587  | SLC19A1   | -0.759±0.228 | 0.164±0.482  | 1.16E-23 |

|            |    |           |           |              |              |          |
|------------|----|-----------|-----------|--------------|--------------|----------|
| cg12943082 | 7  | 75419311  | CCL26     | 0.764±0.285  | 1.857±0.57   | 1.21E-23 |
| cg22187630 | 19 | 13616871  | CACNA1A   | -3.105±0.44  | -1.179±1.005 | 1.30E-23 |
| cg12876594 | 9  | 35791798  | NPR2      | -0.01±0.34   | 1.315±0.692  | 1.32E-23 |
| cg02257405 | 5  | 131346985 | ACSL6     | -1.346±0.26  | -0.312±0.541 | 1.33E-23 |
| cg16812893 | 21 | 31813075  | KRTAP15-1 | 1.47±0.263   | -0.148±0.835 | 1.40E-23 |
| cg10235817 | 4  | 3768555   | ADRA2C    | -1.873±0.509 | -0.252±0.84  | 1.42E-23 |
| cg13797031 | 22 | 29977742  | NIPSNAP1  | 1.8±0.184    | -0.053±0.94  | 1.42E-23 |
| cg07059052 | 16 | 2828302   | TCEB2     | -2.488±0.382 | -3.731±0.645 | 1.43E-23 |
| cg09329225 | 14 | 57734381  | AP5M1     | -0.814±0.345 | 0.483±0.669  | 1.56E-23 |
| cg20537629 | 7  | 79083944  | MAGI2-AS3 | -2.707±0.3   | -0.829±0.971 | 1.57E-23 |
| cg26490372 | 8  | 125552608 | NDUFB9    | 0.398±0.295  | 1.277±0.446  | 1.60E-23 |
| cg27541541 | 6  | 22298146  | PRL       | -0.005±0.32  | 0.921±0.469  | 1.61E-23 |
| cg12758687 | 11 | 113346327 | DRD2      | -2.121±0.317 | -0.74±0.724  | 1.61E-23 |
| cg09837977 | 7  | 110731201 | LRRN3     | 0.394±0.28   | 1.458±0.558  | 1.61E-23 |
| cg07644368 | 5  | 115152785 | CDO1      | -1.594±0.265 | -0.214±0.72  | 1.70E-23 |
| cg09786257 | 5  | 95768695  | PCSK1     | -1.233±0.262 | -0.046±0.623 | 1.87E-23 |
| cg23509869 | 6  | 31553441  | LST1      | -0.521±0.228 | -1.341±0.43  | 1.87E-23 |
| cg14196790 | 5  | 131705035 | SLC22A5   | -2.188±0.33  | -3±0.397     | 1.93E-23 |
| cg01479232 | 20 | 748992    | SLC52A3   | 0.462±0.327  | -0.481±0.484 | 1.95E-23 |
| cg22233974 | 1  | 39546511  | 0         | -1.375±0.357 | -0.361±0.519 | 2.02E-23 |
| cg27347104 | 12 | 6233657   | VWF       | 0.594±0.168  | 1.372±0.409  | 2.05E-23 |
| cg09195271 | 1  | 20142497  | RNF186    | 1.468±0.332  | -0.016±0.781 | 2.08E-23 |
| cg27169020 | 15 | 83954229  | BNC1      | -1.394±0.247 | -0.109±0.673 | 2.13E-23 |
| cg25391023 | 6  | 32374754  | BTNL2     | 0.978±0.252  | -0.364±0.702 | 2.21E-23 |
| cg01148741 | 2  | 96811453  | DUSP2     | -0.672±0.339 | -1.702±0.535 | 2.30E-23 |
| cg15573237 | 1  | 104159187 | AMY2A     | 0.792±0.126  | 0.437±0.182  | 2.31E-23 |
| cg06392096 | 19 | 54824275  | LILRA5    | -0.69±0.162  | -1.424±0.387 | 2.38E-23 |
| cg08832227 | 12 | 5020693   | KCNA1     | -1.281±0.546 | 0.193±0.749  | 2.53E-23 |
| cg22449114 | 20 | 590243    | TCF15     | -1.954±0.408 | -0.623±0.698 | 2.68E-23 |
| cg15856055 | 10 | 135121295 | ZNF511    | -0.573±0.288 | -1.672±0.581 | 2.76E-23 |
| cg11584690 | 19 | 42574196  | 0         | -0.93±0.201  | 0.23±0.608   | 2.81E-23 |
| cg12109455 | 10 | 134000737 | DPYSL4    | -2.984±0.566 | -1.242±0.91  | 2.85E-23 |
| cg03733371 | 3  | 185270528 | LIPH      | -0.83±0.355  | -1.918±0.567 | 2.92E-23 |
| cg22994720 | 11 | 74441988  | CHRD12    | -3.466±0.39  | -1.595±0.988 | 3.01E-23 |
| cg26133068 | 22 | 24199008  | SLC2A11   | -1.15±0.273  | -2.177±0.544 | 3.09E-23 |
| cg19787037 | 8  | 7321179   | SPAG11B   | 0.339±0.135  | -0.533±0.456 | 3.11E-23 |
| cg05064181 | 10 | 116445398 | ABLM1     | 0.521±0.372  | 1.6±0.56     | 3.17E-23 |
| cg10414946 | 11 | 59856358  | MS4A2     | 0.592±0.23   | -0.537±0.597 | 3.25E-23 |
| cg05546044 | 22 | 22222597  | MAPK1     | -0.34±0.332  | -1.539±0.635 | 3.28E-23 |
| cg06850526 | 17 | 79269886  | SLC38A10  | 0.12±0.295   | -1.145±0.671 | 3.35E-23 |
| cg24762359 | 13 | 25254447  | ATP12A    | -3.088±0.385 | -4.103±0.515 | 3.35E-23 |
| cg05790038 | 17 | 3461143   | TRPV3     | 1.134±0.416  | -0.041±0.607 | 3.37E-23 |
| cg18397523 | 7  | 27282351  | EVX1      | -3.557±0.287 | -1.357±1.145 | 3.43E-23 |
| cg06092815 | 2  | 229046406 | SPHKAP    | -1.629±0.333 | -0.362±0.673 | 3.55E-23 |
| cg00902195 | 12 | 33592500  | SYT10     | -3.528±0.671 | -1.491±1.068 | 4.03E-23 |
| cg25563456 | 11 | 32456069  | WT1       | -4.132±0.42  | -2.02±1.12   | 4.19E-23 |
| cg19238840 | 16 | 20339175  | GP2       | -0.624±0.262 | -1.679±0.562 | 4.24E-23 |
| cg18087477 | 1  | 115397597 | SYCP1     | -0.152±0.349 | 0.811±0.497  | 4.32E-23 |
| cg04983977 | 1  | 200842145 | GPR25     | 0.576±0.186  | 1.303±0.388  | 4.46E-23 |
| cg01295203 | 8  | 70984199  | PRDM14    | -2.729±0.279 | -0.455±1.186 | 4.50E-23 |
| cg03270204 | 6  | 30851638  | DDR1      | 1.382±0.295  | -0.045±0.758 | 4.51E-23 |
| cg19601035 | 12 | 48399140  | COL2A1    | -1.96±0.347  | -0.628±0.711 | 4.56E-23 |
| cg07455975 | 2  | 175112849 | OLA1      | -3.633±0.341 | -4.478±0.422 | 4.75E-23 |
| cg03741352 | 1  | 152573450 | LCE3C     | 1.855±0.273  | 0.485±0.729  | 4.92E-23 |
| cg21581873 | 1  | 204329307 | PLEKHA6   | -2.936±0.368 | -1.024±1.018 | 5.38E-23 |
| cg16678925 | 17 | 3100972   | OR1A2     | 0.609±0.231  | -0.58±0.633  | 5.39E-23 |
| cg18674980 | 8  | 86350581  | CA3       | -4.019±0.445 | -1.449±1.363 | 5.50E-23 |
| cg21880903 | 4  | 39408665  | KLB       | -0.695±0.347 | 0.526±0.652  | 5.74E-23 |
| cg13301014 | 19 | 38754768  | SPINT2    | -2.351±0.304 | -3.53±0.631  | 5.78E-23 |
| cg01993576 | 6  | 44187674  | SLC29A1   | -0.678±0.25  | -1.733±0.565 | 5.89E-23 |
| cg17749384 | 10 | 28571186  | MPP7      | 1.532±0.195  | 2.12±0.311   | 6.36E-23 |
| cg20959866 | 1  | 4714008   | AJAP1     | -3.284±0.447 | -1.145±1.145 | 6.42E-23 |
| cg13897627 | 16 | 49378497  | 0         | 1.688±0.225  | 0.252±0.761  | 6.66E-23 |
| cg23147597 | 19 | 45174681  | CEACAM19  | 2.217±0.381  | 0.778±0.773  | 6.81E-23 |
| cg24091474 | 19 | 36399185  | TYROBP    | 0.416±0.375  | 1.653±0.661  | 7.42E-23 |
| cg17619823 | 8  | 37823475  | ADRB3     | -4.319±0.772 | -1.853±1.316 | 7.72E-23 |
| cg04219321 | 17 | 53341659  | HLF       | -2.775±0.327 | -0.655±1.126 | 8.00E-23 |
| cg23801057 | 12 | 121569969 | P2RX7     | 0.731±0.3    | 1.57±0.44    | 8.18E-23 |
| cg19118077 | 10 | 5137178   | AKR1C3    | -1.241±0.36  | -2.17±0.471  | 8.59E-23 |
| cg26162582 | 12 | 4918391   | KCNA6     | -3.633±0.612 | -1.179±1.323 | 8.77E-23 |

|            |    |           |            |              |              |          |
|------------|----|-----------|------------|--------------|--------------|----------|
| cg08572611 | 7  | 100253914 | ACTL6B     | -3.23±0.611  | -0.777±1.324 | 9.10E-23 |
| cg21604042 | 6  | 35181401  | SCUBE3     | -2.602±0.359 | -0.614±1.065 | 9.15E-23 |
| cg22134325 | 11 | 66188745  | NPAS4      | -1.263±0.247 | 0.041±0.7    | 9.15E-23 |
| cg11540692 | 6  | 100912072 | SIM1       | -1.788±0.212 | -0.519±0.678 | 9.24E-23 |
| cg26609631 | 13 | 28366814  | GSX1       | -2.386±0.662 | -0.437±1.033 | 9.62E-23 |
| cg16612562 | 22 | 29712045  | RASL10A    | 0.771±0.278  | 1.794±0.553  | 1.07E-22 |
| cg23447996 | 9  | 93564603  | SYK        | -1.115±0.321 | -1.828±0.341 | 1.09E-22 |
| cg16014085 | 16 | 30406122  | ZNF48      | -1.537±0.407 | 0.098±0.885  | 1.11E-22 |
| cg02620769 | 12 | 49298070  | CCDC65     | -4.083±0.435 | -1.28±1.499  | 1.13E-22 |
| cg17910564 | 8  | 42248702  | VDAC3      | 0.596±0.281  | -0.505±0.597 | 1.16E-22 |
| cg23430664 | 17 | 48423021  | XYLT2      | -2.913±0.303 | -3.772±0.454 | 1.16E-22 |
| cg26825755 | 16 | 20587568  | ACSM2B     | -1.095±0.286 | -2.267±0.636 | 1.20E-22 |
| cg04995717 | 9  | 27109293  | TEK        | -1.313±0.223 | -0.083±0.663 | 1.27E-22 |
| cg22545356 | 10 | 88716659  | MMRN2      | 0.648±0.235  | 1.541±0.486  | 1.40E-22 |
| cg10148841 | 11 | 124767455 | ROBO4      | 0.75±0.171   | 1.508±0.412  | 1.43E-22 |
| cg04622802 | 11 | 27015872  | FIBIN      | -1.75±0.541  | -0.138±0.863 | 1.45E-22 |
| cg19780563 | 10 | 94594494  | EXOC6      | 0.957±0.247  | 1.764±0.431  | 1.48E-22 |
| cg14448116 | 1  | 161170110 | NDUFS2     | 1.012±0.231  | 2.039±0.558  | 1.50E-22 |
| cg11455040 | 1  | 205649941 | SLC45A3    | -3.549±0.372 | -4.494±0.488 | 1.52E-22 |
| cg12163132 | 17 | 59475917  | TBX2       | -1.57±0.249  | -0.511±0.577 | 1.54E-22 |
| cg16608652 | 1  | 193155390 | B3GALT2    | -1.264±0.446 | 0.403±0.907  | 1.54E-22 |
| cg11653858 | 17 | 26799289  | SLC13A2    | 0.891±0.239  | 1.7±0.439    | 1.54E-22 |
| cg05221167 | 19 | 9609397   | ZNF560     | -3.4±0.468   | -1.191±1.2   | 1.55E-22 |
| cg10107725 | 2  | 160761556 | LY75-CD302 | -0.568±0.271 | -1.607±0.566 | 1.69E-22 |
| cg07908874 | 10 | 135123006 | TUBGCP2    | 2.17±0.212   | 0.932±0.669  | 1.71E-22 |
| cg02868123 | 2  | 79382913  | 0          | 2.202±0.334  | 0.675±0.832  | 1.75E-22 |
| cg00519208 | 1  | 93258319  | EVI5       | 0.001±0.303  | 0.961±0.513  | 1.88E-22 |
| cg02008154 | 7  | 35293537  | TBX20      | -3.255±0.413 | -0.908±1.273 | 1.92E-22 |
| cg10303487 | 8  | 105479058 | DPYS       | -2.974±0.856 | -0.773±1.146 | 1.92E-22 |
| cg18741908 | 3  | 169756818 | GPR160     | -0.801±0.329 | -2.084±0.701 | 1.95E-22 |
| cg02932167 | 2  | 233352951 | ECEL1      | 0.422±0.164  | 1.239±0.445  | 1.96E-22 |
| cg12827555 | 14 | 74706031  | VSX2       | -2.079±0.225 | -0.487±0.857 | 2.00E-22 |
| cg16731240 | 19 | 52391250  | ZNF577     | -2.036±0.656 | 0.576±1.429  | 2.06E-22 |
| cg24309555 | 2  | 21266956  | APOB       | 0.142±0.278  | -0.763±0.493 | 2.12E-22 |
| cg20789824 | 9  | 127562861 | OLFML2A    | -0.069±0.309 | 0.918±0.537  | 2.14E-22 |
| cg00725635 | 1  | 193155806 | B3GALT2    | -3.207±0.466 | -1.382±1     | 2.16E-22 |
| cg26066361 | 12 | 10282621  | CLEC7A     | 0.791±0.33   | -0.529±0.714 | 2.16E-22 |
| cg15343119 | 18 | 74961785  | GALR1      | -3.172±0.462 | -1.049±1.161 | 2.16E-22 |
| cg22844623 | 1  | 228336130 | GJC2       | 1.324±0.225  | 2.185±0.472  | 2.16E-22 |
| cg05373457 | 8  | 99439948  | KCNS2      | -1.867±0.324 | -0.376±0.816 | 2.16E-22 |
| cg22143352 | 14 | 75897841  | JDP2       | -0.106±0.318 | 0.912±0.553  | 2.16E-22 |
| cg21296230 | 15 | 33010536  | GREM1      | -2.938±0.461 | -0.941±1.094 | 2.19E-22 |
| cg24101578 | 20 | 44880263  | CDH22      | -1.576±0.252 | -0.32±0.686  | 2.19E-22 |
| cg07621046 | 10 | 118429658 | C10orf82   | -1.673±0.349 | -0.324±0.739 | 2.21E-22 |
| cg16196812 | 10 | 120355139 | PRLHR      | -1.33±0.271  | -0.351±0.536 | 2.22E-22 |
| cg01261503 | 17 | 62493599  | POLG2      | -1.579±0.265 | -2.613±0.567 | 2.23E-22 |
| cg20073553 | 4  | 13545291  | NKX3-2     | -2.865±0.394 | -0.998±1.021 | 2.23E-22 |
| cg00019495 | 4  | 57547525  | HOPX       | -1.347±0.295 | -2.349±0.548 | 2.33E-22 |
| cg02337447 | 17 | 10602032  | ADPRM      | 0.437±0.343  | -0.619±0.566 | 2.33E-22 |
| cg06123346 | 19 | 36054519  | ATP4A      | 0.149±0.257  | -0.888±0.569 | 2.38E-22 |
| cg13853761 | 11 | 64863232  | VPS51      | 1.8±0.437    | 2.972±0.621  | 2.53E-22 |
| cg22941086 | 12 | 40019883  | C12orf40   | 1.549±0.369  | 2.439±0.456  | 2.69E-22 |
| cg14034870 | 6  | 30900197  | SFTA2      | 0.025±0.227  | -1±0.563     | 2.72E-22 |
| cg20967028 | 12 | 14996272  | ART4       | 1.744±0.335  | 2.415±0.294  | 2.87E-22 |
| cg27622610 | 17 | 3030185   | OR1G1      | 1.095±0.293  | -0.382±0.81  | 3.00E-22 |
| cg16832407 | 9  | 73736539  | TRPM3      | -2.23±0.341  | -0.675±0.856 | 3.05E-22 |
| cg01796223 | 7  | 129933014 | CPA4       | 0.168±0.275  | -0.649±0.438 | 3.05E-22 |
| cg26687173 | 19 | 33623091  | WDR88      | 1.215±0.402  | 2.28±0.565   | 3.06E-22 |
| cg26186727 | 18 | 70534534  | NETO1      | -2.521±0.566 | -0.679±1.009 | 3.13E-22 |
| cg18888403 | 1  | 24152774  | HMGCL      | 2.826±0.338  | 1.147±0.923  | 3.18E-22 |
| cg26963271 | 1  | 66259081  | PDE4B      | -3.966±0.673 | -1.852±1.155 | 3.18E-22 |
| cg24673765 | 19 | 36247869  | HSPB6      | -1.631±0.394 | -0.548±0.581 | 3.28E-22 |
| cg15514848 | 1  | 171217555 | FMO1       | -0.007±0.306 | 0.867±0.467  | 3.52E-22 |
| cg08307963 | 1  | 147245485 | GJA5       | -3.458±0.377 | -1.385±1.138 | 3.60E-22 |
| cg25433648 | 1  | 153588782 | S100A14    | 1.4±0.264    | -0.104±0.825 | 3.61E-22 |
| cg14992108 | 8  | 121825470 | SNTB1      | 1.324±0.306  | -0.183±0.831 | 3.69E-22 |
| cg16873863 | 11 | 2921176   | SLC22A18   | 1.046±0.207  | -0.545±0.865 | 3.73E-22 |
| cg21414251 | 6  | 29364554  | OR12D2     | 0.453±0.267  | -0.859±0.723 | 3.76E-22 |
| cg18536148 | 17 | 59533844  | TBX4       | -1.336±0.451 | 0.48±1.005   | 3.87E-22 |
| cg02813863 | 12 | 12938287  | APOLD1     | 1.31±0.314   | 2.042±0.372  | 3.87E-22 |

|            |    |           |           |              |              |          |
|------------|----|-----------|-----------|--------------|--------------|----------|
| cg17770886 | 10 | 135121331 | ZNF511    | -1.777±0.295 | -2.5±0.376   | 4.10E-22 |
| cg00925717 | 16 | 23313148  | SCNN1B    | -2.65±0.348  | -1.505±0.63  | 4.15E-22 |
| cg15089387 | 5  | 110406661 | TSLP      | -1.132±0.334 | -2.571±0.797 | 4.38E-22 |
| cg13688966 | 3  | 149192377 | TM4SF4    | -0.2±0.274   | -1.384±0.657 | 4.53E-22 |
| cg05840031 | 11 | 31832353  | PAX6      | -2.499±0.247 | -0.898±0.878 | 4.53E-22 |
| cg19392109 | 15 | 39542693  | C15orf54  | 1.845±0.254  | 0.374±0.811  | 4.98E-22 |
| cg06793062 | 16 | 76343868  | CNTNAP4   | 1.823±0.323  | 0.288±0.852  | 5.09E-22 |
| cg19103609 | 19 | 14543524  | PKN1      | 0.878±0.313  | -0.168±0.579 | 5.19E-22 |
| cg19988449 | 15 | 83952808  | BNC1      | -2.859±0.452 | -0.899±1.09  | 5.26E-22 |
| cg20876010 | 1  | 64971752  | CACHD1    | -0.077±0.211 | -0.976±0.5   | 5.30E-22 |
| cg02161900 | 10 | 28035631  | MKX       | -2.579±0.259 | -0.675±1.043 | 5.46E-22 |
| cg26738880 | 7  | 154429032 | DPP6      | 1.356±0.34   | -0.29±0.914  | 5.49E-22 |
| cg27011193 | 2  | 91848204  | LOC654342 | -1.281±0.312 | -0.511±0.404 | 5.50E-22 |
| cg21771250 | 22 | 40406049  | FAM83F    | -0.804±0.301 | 0.404±0.673  | 5.60E-22 |
| cg01805282 | 6  | 133563764 | EYA4      | -2.245±0.324 | -0.288±1.08  | 5.70E-22 |
| cg03602500 | 19 | 55047721  | KIR3DX1   | 2.341±0.321  | 0.865±0.821  | 5.72E-22 |
| cg13234863 | 12 | 130389138 | TMEM132D  | -2.549±0.425 | -0.861±0.941 | 5.89E-22 |
| cg18601426 | 7  | 158381220 | PTPRN2    | -1.557±0.234 | -0.392±0.647 | 5.98E-22 |
| cg02624705 | 18 | 49868678  | DCC       | -3.454±0.531 | -1.428±1.129 | 5.99E-22 |
| cg15679095 | 6  | 42789053  | GLTSCR1L  | 1.194±0.255  | 1.966±0.425  | 6.01E-22 |
| cg15129294 | 17 | 34639274  | CCL4L2    | 0.215±0.27   | -1.05±0.696  | 6.12E-22 |
| cg09059945 | 7  | 130126018 | MEST      | -1.211±0.315 | -2.377±0.651 | 6.45E-22 |
| cg10466917 | 7  | 141958449 | PRSS58    | 0.338±0.241  | -0.866±0.671 | 6.94E-22 |
| cg09088576 | 1  | 36947785  | CSF3R     | -1.51±0.287  | 0.177±0.936  | 7.15E-22 |
| cg24949488 | 10 | 98064362  | DNTT      | 1.604±0.479  | 0.138±0.811  | 7.25E-22 |
| cg26780333 | 14 | 74058972  | ACOT4     | -3.89±0.571  | -2.092±0.997 | 7.29E-22 |
| cg21130374 | 21 | 42734266  | MX2       | 0.027±0.408  | -1.78±1.011  | 7.46E-22 |
| cg05244766 | 11 | 67350499  | GSTP1     | 1.959±0.324  | 0.524±0.803  | 7.72E-22 |
| cg07897701 | 7  | 150549370 | AOC1      | 0.981±0.279  | -0.158±0.638 | 7.82E-22 |
| cg15177359 | 17 | 73840750  | UNC13D    | -1.248±0.227 | -2.071±0.461 | 8.04E-22 |
| cg24879335 | 3  | 133465180 | TF        | -2.826±0.425 | -0.969±1.04  | 8.22E-22 |
| cg14477619 | 7  | 44580881  | NPC1L1    | 1.721±0.203  | 2.268±0.298  | 8.44E-22 |
| cg10300684 | 14 | 29236323  | FOXG1     | -2.88±0.403  | -0.946±1.083 | 8.91E-22 |
| cg26453588 | 22 | 43506021  | BIK       | -0.456±0.273 | 0.588±0.587  | 9.16E-22 |
| cg18482268 | 5  | 145718965 | POU4F3    | -3.404±0.383 | -1.426±1.107 | 9.19E-22 |
| cg25431974 | 2  | 233352936 | ECEL1     | 0.538±0.203  | 1.647±0.62   | 9.54E-22 |
| cg26200585 | 19 | 40919245  | PRX       | -0.224±0.405 | 1.217±0.809  | 9.58E-22 |
| cg02028524 | 14 | 92573410  | ATXN3     | 3.078±0.312  | 0.803±1.261  | 9.67E-22 |
| cg14822966 | 4  | 1714979   | SLBP      | -3.7±0.312   | -4.499±0.429 | 9.67E-22 |
| cg12680609 | 8  | 144328500 | ZFP41     | -3.965±0.418 | -1.58±1.334  | 1.06E-21 |
| cg01484156 | 8  | 102802615 | NCALD     | -0.141±0.286 | 1.149±0.716  | 1.06E-21 |
| cg27652350 | 15 | 101420989 | ALDH1A3   | -2.529±0.507 | -0.362±1.221 | 1.09E-21 |
| cg08886154 | 7  | 127256676 | PAX4      | 0.85±0.263   | -0.449±0.73  | 1.10E-21 |
| cg00187686 | 11 | 59634218  | TCN1      | 0.837±0.322  | -0.49±0.748  | 1.12E-21 |
| cg02994974 | 11 | 13984544  | SPON1     | -3.317±0.542 | -1.443±1.053 | 1.13E-21 |
| cg01656216 | 10 | 31273710  | ZNF438    | -0.418±0.26  | 0.352±0.423  | 1.14E-21 |
| cg14162076 | 12 | 8665092   | CLEC4D    | 2.581±0.412  | 1.267±0.735  | 1.17E-21 |
| cg10039928 | 8  | 98880860  | MATN2     | 0.341±0.173  | -0.395±0.415 | 1.21E-21 |
| cg22183706 | 11 | 14993818  | CALCA     | -2.932±0.431 | -1.422±0.85  | 1.21E-21 |
| cg08970694 | 11 | 5290746   | HBE1      | 0.828±0.205  | -0.626±0.81  | 1.22E-21 |
| cg10207745 | 12 | 13529963  | C12orf36  | 0.679±0.301  | -0.6±0.722   | 1.26E-21 |
| cg18931815 | 1  | 36565772  | COL8A2    | 0.42±0.444   | -0.85±0.703  | 1.26E-21 |
| cg04958389 | 0  | 0         | 0         | 1.442±0.218  | 0.153±0.723  | 1.31E-21 |
| cg14958635 | 5  | 134870977 | NEUROG1   | -3.164±0.579 | -0.983±1.232 | 1.33E-21 |
| cg01324261 | 4  | 174320378 | SCRG1     | 0.525±0.251  | 1.428±0.51   | 1.38E-21 |
| cg05248470 | 19 | 54785348  | LILRB2    | 0.766±0.233  | -0.348±0.629 | 1.45E-21 |
| cg26701826 | 4  | 108814604 | SGMS2     | -0.662±0.311 | 0.476±0.644  | 1.46E-21 |
| cg04999691 | 7  | 150027050 | ZBED6CL   | 0.287±0.195  | 1.072±0.444  | 1.47E-21 |
| cg13577076 | 7  | 752456    | PRKAR1B   | -2.741±0.421 | -0.928±1.027 | 1.49E-21 |
| cg11802013 | 11 | 69469175  | CCND1     | 2.201±0.322  | 1.046±0.653  | 1.50E-21 |
| cg07947016 | 19 | 51375893  | KLK2      | 0.526±0.273  | -0.838±0.771 | 1.51E-21 |
| cg25483003 | 9  | 139948856 | ENTPD2    | -1.125±0.399 | -2.264±0.633 | 1.55E-21 |
| cg02586730 | 11 | 65639869  | EFEMP2    | -0.2±0.222   | 0.724±0.524  | 1.57E-21 |
| cg23642747 | 10 | 105036645 | INA       | -3.309±0.268 | -1.694±0.909 | 1.66E-21 |
| cg09626634 | 13 | 99960369  | GPR183    | -0.469±0.27  | -1.686±0.69  | 1.68E-21 |
| cg16254309 | 7  | 145814152 | CNTNAP2   | -2.867±0.422 | -0.789±1.177 | 1.68E-21 |
| cg25902889 | 19 | 4305090   | FSD1      | -0.268±0.353 | 1.207±0.838  | 1.68E-21 |
| cg22980079 | 4  | 2627118   | FAM193A   | 1.335±0.261  | 2.187±0.482  | 1.83E-21 |
| cg02589695 | 1  | 206730999 | RASSF5    | -1.774±0.295 | -2.736±0.544 | 1.90E-21 |
| cg24199834 | 4  | 147560126 | POU4F2    | -2.917±0.342 | -0.733±1.233 | 2.16E-21 |

|            |    |           |           |              |              |          |
|------------|----|-----------|-----------|--------------|--------------|----------|
| cg11921829 | 1  | 157746930 | FCRL2     | 1.102±0.319  | -0.085±0.676 | 2.19E-21 |
| cg02141570 | 3  | 197808633 | ANKRD18DP | -0.134±0.165 | 0.438±0.326  | 2.31E-21 |
| cg25781162 | 2  | 44065996  | ABCG5     | 1.923±0.299  | 2.633±0.378  | 2.35E-21 |
| cg10186456 | 16 | 2892912   | PRSS30P   | 0.147±0.312  | 1.362±0.694  | 2.37E-21 |
| cg06277657 | 7  | 137532374 | DGKI      | -2.843±0.437 | -0.892±1.114 | 2.42E-21 |
| cg24505341 | 3  | 62861544  | CADPS     | -1.501±0.327 | -0.231±0.726 | 2.43E-21 |
| cg17389519 | 10 | 23480730  | PTF1A     | -2.098±0.264 | -0.885±0.693 | 2.47E-21 |
| cg20899321 | 11 | 76380605  | LRRC32    | 1.138±0.313  | 2.018±0.492  | 2.48E-21 |
| cg07376535 | 18 | 905450    | ADCYAP1   | -3.292±0.453 | -1.707±0.904 | 2.50E-21 |
| cg05976074 | 19 | 33716273  | SLC7A10   | -1.076±0.295 | -0.044±0.589 | 2.53E-21 |
| cg18096388 | 2  | 242800973 | PDCD1     | -0.977±0.198 | -1.57±0.335  | 2.57E-21 |
| cg14297029 | 22 | 37607676  | SSTR3     | 1.342±0.31   | 2.441±0.628  | 2.61E-21 |
| cg23114594 | 10 | 13544648  | BEND7     | 1.097±0.36   | 2.041±0.521  | 2.62E-21 |
| cg19233472 | 5  | 169532752 | FOXI1     | 0.78±0.278   | -0.546±0.758 | 2.74E-21 |
| cg05073035 | 3  | 147127193 | ZIC1      | -2.048±0.209 | -0.831±0.693 | 2.81E-21 |
| cg13462129 | 7  | 96651281  | DLX5      | -1.277±0.289 | 0.192±0.839  | 2.83E-21 |
| cg09614401 | 20 | 4229009   | ADRA1D    | 2.23±0.386   | 3.153±0.496  | 2.91E-21 |
| cg00995520 | 1  | 111218282 | KCNA3     | -0.556±0.38  | 0.853±0.808  | 2.95E-21 |
| cg16708281 | 2  | 114256673 | FOXD4L1   | -0.701±0.195 | -0.046±0.374 | 2.95E-21 |
| cg06204948 | 11 | 63656090  | MARK2     | -0.781±0.325 | -1.9±0.64    | 2.96E-21 |
| cg21269934 | 4  | 2060219   | NAT8L     | -3.619±0.723 | -1.504±1.194 | 2.96E-21 |
| cg13102585 | 17 | 42386208  | RUNDC3A   | -2.316±0.249 | -0.937±0.787 | 3.02E-21 |
| cg03266453 | 2  | 119606055 | EN1       | -3.223±0.405 | -1.713±0.866 | 3.08E-21 |
| cg20559736 | 19 | 45174671  | CEACAM19  | 1.541±0.235  | 1.004±0.283  | 3.19E-21 |
| cg01009664 | 3  | 129693613 | TRH       | -3.226±0.381 | -0.61±1.486  | 3.24E-21 |
| cg14072120 | 22 | 37640402  | RAC2      | -3.232±0.333 | -3.986±0.396 | 3.25E-21 |
| cg11743470 | 5  | 74327277  | GCNT4     | -0.473±0.278 | 0.252±0.398  | 3.66E-21 |
| cg02601403 | 17 | 34592053  | TBC1D3C   | 1.911±0.322  | 0.736±0.676  | 3.69E-21 |
| cg08047907 | 1  | 169396858 | CCDC181   | -4.644±0.444 | -1.776±1.635 | 3.71E-21 |
| cg21030598 | 3  | 196466425 | PAK2      | -1.112±0.271 | -0.004±0.638 | 3.71E-21 |
| cg13259290 | 5  | 131408382 | CSF2      | 0.993±0.244  | -0.08±0.618  | 3.91E-21 |
| cg22123464 | 19 | 47974901  | SLC8A2    | -1.909±0.357 | -0.735±0.674 | 4.07E-21 |
| cg14544583 | 11 | 5248566   | HBB       | 1.562±0.313  | -0.049±0.926 | 4.18E-21 |
| cg08451957 | 2  | 114256406 | FOXD4L1   | 0.745±0.226  | 1.513±0.442  | 4.38E-21 |
| cg06226384 | 17 | 64873351  | CACNG5    | -0.351±0.247 | -1.55±0.691  | 4.55E-21 |
| cg20234959 | 1  | 236237760 | 0         | 1.29±0.366   | 0.049±0.705  | 4.59E-21 |
| cg15843823 | 17 | 4544964   | ALOX15    | -3.226±0.334 | -1.641±0.914 | 4.62E-21 |
| cg03283569 | 9  | 127963181 | RABEPK    | -2.57±0.251  | -3.155±0.314 | 4.71E-21 |
| cg09949775 | 19 | 18902107  | COMP      | -1.81±0.394  | -0.002±1.045 | 4.72E-21 |
| cg27243140 | 17 | 72931664  | OTOP3     | -2.567±0.48  | -1.203±0.773 | 4.82E-21 |
| cg16263182 | 16 | 223399    | HBA2      | -3.459±0.612 | -1.865±0.89  | 4.93E-21 |
| cg00174901 | 19 | 709889    | PALM      | -1.933±0.484 | -0.742±0.655 | 4.97E-21 |
| cg20831708 | 10 | 102279373 | SEC31B    | -0.347±0.487 | 1.177±0.875  | 5.05E-21 |
| cg14802951 | 9  | 136287409 | ADAMTS13  | -0.715±0.304 | 0.248±0.553  | 5.07E-21 |
| cg06948294 | 14 | 25518624  | STXBP6    | -4.208±0.338 | -2.453±1.013 | 5.15E-21 |
| cg24670715 | 8  | 6420506   | ANGPT2    | -0.199±0.302 | 0.814±0.585  | 5.20E-21 |
| cg08529852 | 9  | 139557920 | EGFL7     | 0.678±0.245  | 1.717±0.603  | 5.56E-21 |
| cg19343464 | 11 | 105481509 | GRIA4     | -3.837±0.414 | -1.343±1.437 | 5.78E-21 |
| cg24169822 | 7  | 27170994  | HOXA4     | -1.228±0.422 | 0.044±0.729  | 5.78E-21 |
| cg21484834 | 20 | 62168579  | PTK6      | 1.247±0.219  | 0.213±0.599  | 5.79E-21 |
| cg21468416 | 9  | 127019914 | NEK6      | -0.78±0.191  | -1.692±0.528 | 5.80E-21 |
| cg23282674 | 1  | 207039302 | IL20      | 1.491±0.229  | 2.079±0.328  | 5.92E-21 |
| cg19789466 | 12 | 113344923 | OAS1      | -2.99±0.315  | -4.058±0.618 | 6.05E-21 |
| cg18490846 | 17 | 48845722  | LINC00483 | -0.482±0.273 | -1.651±0.679 | 6.12E-21 |
| cg27665659 | 7  | 100797595 | AP1S1     | -3.795±0.357 | -4.547±0.384 | 6.16E-21 |
| cg10647513 | 16 | 227203    | HBA1      | -3.124±0.614 | -1.493±0.919 | 6.23E-21 |
| cg03755123 | 10 | 135043508 | UTF1      | -2.572±0.368 | -0.914±0.963 | 6.45E-21 |
| cg14859460 | 5  | 178422244 | GRM6      | -3.044±0.638 | -0.779±1.315 | 6.46E-21 |
| cg09656934 | 1  | 179561500 | TDRD5     | -0.725±0.356 | 0.495±0.707  | 6.51E-21 |
| cg05973262 | 6  | 32191895  | NOTCH4    | 0.062±0.207  | 0.994±0.541  | 6.54E-21 |
| cg03544320 | 4  | 5894691   | CRMP1     | -0.55±0.668  | 0.832±0.698  | 7.12E-21 |
| cg03294491 | 18 | 45458243  | SMAD2     | -0.918±0.277 | -1.903±0.573 | 7.19E-21 |
| cg24820809 | 22 | 36019252  | MB        | 2.688±0.227  | 1.096±0.917  | 7.20E-21 |
| cg25484904 | 4  | 48988015  | CWH43     | -1.617±0.346 | -0.214±0.818 | 7.33E-21 |
| cg22752533 | 20 | 44657948  | SLC12A5   | -0.876±0.378 | 0.142±0.577  | 7.65E-21 |
| cg14262937 | 6  | 154360351 | OPRM1     | -3.118±0.413 | -1.336±1.039 | 7.65E-21 |
| cg03483626 | 1  | 111218276 | KCNA3     | -0.751±0.406 | 0.757±0.88   | 7.82E-21 |
| cg15606663 | 21 | 31812603  | KRTAP15-1 | 0.858±0.211  | -0.471±0.769 | 7.84E-21 |
| cg11394785 | 5  | 179221090 | LTC4S     | -0.602±0.258 | 0.5±0.644    | 8.16E-21 |
| cg26673195 | 17 | 41052729  | G6PC      | -0.15±0.329  | -1.351±0.701 | 8.59E-21 |

|            |    |           |           |              |              |          |
|------------|----|-----------|-----------|--------------|--------------|----------|
| cg06436504 | 3  | 99833735  | CMSS1     | 0.849±0.309  | 1.868±0.593  | 8.73E-21 |
| cg27041096 | 8  | 120079173 | COLEC10   | 0.379±0.397  | 1.405±0.578  | 8.80E-21 |
| cg10031456 | 2  | 33661691  | RASGRP3   | 0.342±0.308  | 1.192±0.436  | 8.87E-21 |
| cg08876932 | 11 | 71955547  | PHOX2A    | -4.101±0.535 | -1.985±1.238 | 9.07E-21 |
| cg27420123 | 11 | 30251473  | FSHB      | 0.556±0.219  | -0.633±0.693 | 9.39E-21 |
| cg26465611 | 5  | 126626719 | MEGF10    | -1.941±0.309 | -0.614±0.777 | 9.47E-21 |
| cg06818777 | 17 | 48546620  | CHAD      | -1.108±0.408 | 0.169±0.741  | 9.50E-21 |
| cg15422147 | 18 | 61144339  | SERPINB5  | 1.99±0.324   | 0.648±0.786  | 9.51E-21 |
| cg19220586 | 1  | 167522470 | CREG1     | -3.815±0.332 | -4.718±0.515 | 9.64E-21 |
| cg06339657 | 5  | 76505932  | PDE8B     | -1.001±0.296 | -0.016±0.575 | 1.00E-20 |
| cg02329886 | 15 | 50557917  | HDC       | 1.865±0.224  | 2.486±0.356  | 1.00E-20 |
| cg10114327 | 4  | 122301573 | QRFPR     | -1.206±0.302 | 0.064±0.745  | 1.01E-20 |
| cg25564800 | 3  | 122234134 | KPNA1     | -2.747±0.345 | -3.629±0.498 | 1.04E-20 |
| cg14458834 | 17 | 46655394  | HOXB4     | -3.687±0.476 | -0.589±1.801 | 1.04E-20 |
| cg15520279 | 2  | 176995088 | HOXD8     | -3.228±0.882 | -0.895±1.326 | 1.05E-20 |
| cg05927017 | 18 | 60988155  | 0         | -3.472±0.303 | -4.165±0.376 | 1.05E-20 |
| cg21946698 | 16 | 326615    | RGS11     | 0.964±0.356  | 2.157±0.697  | 1.06E-20 |
| cg15736165 | 15 | 83951732  | BNC1      | -2.227±0.244 | -0.898±0.776 | 1.07E-20 |
| cg17074151 | 9  | 139660381 | LCN15     | 0.337±0.222  | -0.46±0.467  | 1.08E-20 |
| cg23350580 | 17 | 34592075  | TBC1D3C   | 1.576±0.234  | 0.78±0.466   | 1.14E-20 |
| cg10762615 | 17 | 18647327  | FBXW10    | -0.161±0.307 | 0.904±0.624  | 1.15E-20 |
| cg09944526 | 10 | 94594201  | EXOC6     | 0.296±0.292  | 1.187±0.512  | 1.21E-20 |
| cg17385448 | 1  | 15911702  | AGMAT     | -0.553±0.296 | -1.405±0.493 | 1.27E-20 |
| cg13552869 | 16 | 29909924  | SEZ6L2    | -0.877±0.278 | 0.07±0.556   | 1.33E-20 |
| cg09508556 | 6  | 31106982  | PSORS1C2  | 2.173±0.357  | 1.048±0.658  | 1.33E-20 |
| cg13351583 | 9  | 91793648  | SHC3      | -2.249±0.333 | -3.14±0.511  | 1.37E-20 |
| cg23732024 | 8  | 74903801  | LY96      | -0.296±0.368 | -2.267±1.157 | 1.37E-20 |
| cg03388193 | 10 | 100996070 | HPSE2     | -3.666±0.479 | -1.912±1.034 | 1.42E-20 |
| cg15522957 | 11 | 44324925  | ALX4      | -1.127±0.291 | 0.105±0.727  | 1.42E-20 |
| cg00015770 | 4  | 122302007 | QRFPR     | -2.402±0.258 | -0.513±1.103 | 1.49E-20 |
| cg24042452 | 1  | 156305664 | TSACC     | 1.704±0.243  | 2.421±0.418  | 1.53E-20 |
| cg25500444 | 11 | 86086101  | CCDC81    | -2.544±0.403 | -1.149±0.822 | 1.53E-20 |
| cg24272559 | 1  | 166572716 | FMO9P     | 2.195±0.321  | 0.641±0.917  | 1.55E-20 |
| cg16042149 | 22 | 29875947  | NEFH      | -3.257±0.434 | -1.477±1.052 | 1.55E-20 |
| cg24868271 | 3  | 38070460  | PLCD1     | 0.572±0.151  | 1.252±0.402  | 1.57E-20 |
| cg25165199 | 13 | 49107693  | RCBTB2    | -0.1±0.229   | 0.54±0.371   | 1.64E-20 |
| cg01868128 | 1  | 152483675 | LCE5A     | 0.546±0.175  | -0.437±0.579 | 1.64E-20 |
| cg20881910 | 11 | 131780332 | NTM       | -3.337±0.6   | -1.354±1.168 | 1.65E-20 |
| cg05592398 | 7  | 73497778  | LIMK1     | -3.374±0.333 | -1.67±1.006  | 1.65E-20 |
| cg21665774 | 19 | 34790692  | KIAA0355  | 0.249±0.255  | 1.027±0.451  | 1.72E-20 |
| cg09260089 | 10 | 134599860 | NKX6-2    | -3.249±0.537 | -1.41±1.086  | 1.75E-20 |
| cg12878228 | 7  | 142456124 | PRSS1     | 0.583±0.206  | -0.576±0.683 | 1.80E-20 |
| cg24440147 | 9  | 131464516 | PKN3      | 1.27±0.24    | 0.296±0.577  | 1.80E-20 |
| cg04721098 | 16 | 24265703  | CACNG3    | 0.955±0.266  | -0.336±0.764 | 1.83E-20 |
| cg09451092 | 1  | 159869223 | CCDC19    | 2.489±0.333  | 1.278±0.717  | 1.84E-20 |
| cg22643217 | 21 | 32253964  | KRTAP11-1 | 1.053±0.238  | -0.331±0.816 | 1.86E-20 |
| cg07879977 | 16 | 3254567   | OR1F1     | 0.908±0.35   | -0.423±0.79  | 1.95E-20 |
| cg07379574 | 19 | 18724173  | TMEM59L   | -2.935±0.315 | -1.456±0.878 | 2.06E-20 |
| cg14424579 | 2  | 27274309  | AGBL5     | -4.169±0.279 | -4.891±0.414 | 2.06E-20 |
| cg22984277 | 12 | 8694212   | CLEC4E    | 1.586±0.221  | 1.054±0.299  | 2.06E-20 |
| cg27486427 | 3  | 25469919  | RARB      | -3.919±0.518 | -1.948±1.171 | 2.11E-20 |
| cg24019564 | 1  | 25257566  | RUNX3     | -1.729±0.418 | -0.341±0.822 | 2.21E-20 |
| cg01798589 | 3  | 36421572  | STAC      | -1.616±0.319 | -2.333±0.394 | 2.23E-20 |
| cg04802221 | 16 | 67223955  | EXOC3L1   | 0.484±0.29   | 1.33±0.496   | 2.30E-20 |
| cg25593948 | 6  | 50786670  | TFAP2B    | -2.332±0.362 | -0.782±0.923 | 2.38E-20 |
| cg23582919 | 16 | 23568380  | EARS2     | -3.446±0.307 | -4.182±0.415 | 2.57E-20 |
| cg27341860 | 1  | 248099880 | OR2L13    | 2.828±0.344  | 1.3±0.911    | 2.61E-20 |
| cg00539322 | 2  | 234216360 | SAG       | 0.423±0.265  | 0.994±0.307  | 2.63E-20 |
| cg04784672 | 14 | 42077674  | LRFN5     | -3.471±0.542 | -1.323±1.284 | 2.90E-20 |
| cg27461196 | 19 | 35630106  | FXYP1     | 0.512±0.179  | 1.241±0.436  | 2.97E-20 |
| cg02854090 | 6  | 25726895  | HIST1H2AA | 3.474±0.363  | 1.723±1.045  | 2.97E-20 |
| cg25711779 | 2  | 56149825  | EFEMP1    | -2.424±0.301 | -0.746±0.999 | 2.98E-20 |
| cg18873386 | 7  | 96651915  | DLX5      | -1.287±0.209 | -0.221±0.636 | 3.00E-20 |
| cg25044651 | 5  | 115298720 | AQPEP     | -1.965±0.46  | -0.291±1     | 3.01E-20 |
| cg18414381 | 11 | 34642885  | EHF       | -0.236±0.221 | -1.304±0.638 | 3.05E-20 |
| cg18107827 | 1  | 26488988  | FAM110D   | -1.392±0.311 | -2.246±0.499 | 3.10E-20 |
| cg08077673 | 7  | 130126368 | MEST      | -0.978±0.324 | -2.094±0.666 | 3.11E-20 |
| cg20356482 | 9  | 97356092  | FBP2      | 0.915±0.277  | 1.729±0.481  | 3.15E-20 |
| cg19807685 | 16 | 82068980  | HSD17B2   | 1.413±0.257  | 0.305±0.663  | 3.16E-20 |
| cg15645309 | 14 | 75988747  | BATF      | -0.952±0.353 | -2.198±0.727 | 3.22E-20 |

|            |    |           |          |              |              |          |
|------------|----|-----------|----------|--------------|--------------|----------|
| cg04995095 | 17 | 72619556  | CD300E   | 0.809±0.262  | -0.619±0.852 | 3.24E-20 |
| cg25882366 | 17 | 46622037  | HOXB-AS1 | -1.15±0.294  | -0.017±0.679 | 3.37E-20 |
| cg12768605 | 19 | 44324951  | LYPD5    | -3.29±0.53   | -1.162±1.276 | 3.37E-20 |
| cg24365867 | 11 | 10715595  | MRVI1    | -0.06±0.283  | 0.795±0.507  | 3.51E-20 |
| cg19497444 | 11 | 2930794   | SLC22A18 | 1.147±0.228  | 1.809±0.391  | 3.53E-20 |
| cg07841014 | 2  | 79314745  | REG1B    | 2.916±0.283  | 1.328±0.949  | 3.61E-20 |
| cg04810997 | 7  | 143140674 | TAS2R60  | 2.12±0.267   | 0.447±0.998  | 3.62E-20 |
| cg17186803 | 11 | 118023038 | SCN4B    | -1.57±0.301  | -0.346±0.735 | 3.65E-20 |
| cg20498685 | 7  | 19156086  | TWIST1   | -3.991±0.352 | -1.761±1.329 | 3.71E-20 |
| cg27118825 | 19 | 46318748  | RSPH6A   | -0.984±0.19  | -0.291±0.416 | 3.84E-20 |
| cg03909500 | 5  | 33936597  | RXFP3    | -3.768±0.384 | -1.963±1.084 | 3.84E-20 |
| cg26514942 | 2  | 103378506 | TMEM182  | 0.961±0.314  | 1.741±0.448  | 3.87E-20 |
| cg12238343 | 5  | 33936402  | RXFP3    | -4.437±0.491 | -2.504±1.163 | 4.10E-20 |
| cg03973663 | 8  | 56791576  | LYN      | -1.259±0.357 | -2.149±0.513 | 4.14E-20 |
| cg25082710 | 1  | 152880108 | IVL      | -0.472±0.295 | -1.651±0.71  | 4.17E-20 |
| cg04007936 | 16 | 8954017   | CARHSP1  | 1.446±0.245  | 2.269±0.494  | 4.18E-20 |
| cg16869108 | 3  | 10184319  | VHL      | 1.292±0.493  | -0.194±0.885 | 4.23E-20 |
| cg26511321 | 7  | 27196790  | HOXA7    | -0.999±0.241 | 0.297±0.777  | 4.23E-20 |
| cg14870271 | 17 | 76976010  | LGALS3BP | -1.518±0.244 | -2.335±0.49  | 4.27E-20 |
| cg04837071 | 9  | 140318649 | NOXA1    | 0.419±0.243  | -0.52±0.566  | 4.34E-20 |
| cg17982102 | 18 | 9707896   | RAB31    | -3.245±0.338 | -1.403±1.106 | 4.43E-20 |
| cg18441959 | 22 | 22599332  | VPREB1   | -0.829±0.252 | -1.776±0.57  | 4.48E-20 |
| cg23182299 | 12 | 113909744 | LHX5     | -4.307±0.493 | -2.723±0.949 | 4.57E-20 |
| cg03886110 | 0  | 0         | 0        | 0.49±0.253   | 1.421±0.561  | 4.60E-20 |
| cg20523861 | 13 | 70682324  | KLHL1    | -1.708±0.363 | -0.338±0.827 | 4.73E-20 |
| cg12397274 | 6  | 54172183  | TINAG    | 0.308±0.203  | -0.852±0.697 | 4.74E-20 |
| cg23173455 | 22 | 22988684  | GGTLC2   | 0.714±0.188  | 0.052±0.399  | 4.76E-20 |
| cg06233985 | 11 | 5249528   | HBB      | 1.369±0.252  | 0.303±0.635  | 4.78E-20 |
| cg10362475 | 11 | 70507825  | SHANK2   | 0.062±0.296  | 1.215±0.696  | 4.93E-20 |
| cg04080057 | 19 | 54495183  | CACNG6   | -1.214±0.205 | -0.281±0.563 | 4.99E-20 |
| cg15749858 | 7  | 20256996  | MACC1    | -1.666±0.34  | -2.391±0.394 | 5.07E-20 |
| cg15005385 | 17 | 34626054  | CCL3L1   | 0.629±0.239  | -0.766±0.828 | 5.08E-20 |
| cg14384532 | 15 | 88800624  | NTRK3    | -3.517±0.302 | -1.416±1.259 | 5.15E-20 |
| cg22398616 | 13 | 53314203  | LECT1    | -0.088±0.24  | 0.779±0.524  | 5.26E-20 |
| cg18833140 | 10 | 115312553 | HABP2    | 0.538±0.189  | -0.524±0.64  | 5.52E-20 |
| cg06563300 | 12 | 100750811 | SLC17A8  | -2.227±0.374 | -0.43±1.086  | 5.59E-20 |
| cg14940420 | 3  | 51895692  | IQCF2    | 1.396±0.281  | 0.313±0.655  | 5.66E-20 |
| cg21816539 | 21 | 31312328  | GRIK1    | -3.247±0.52  | -1.514±1.045 | 5.67E-20 |
| cg10634115 | 17 | 80330743  | UTS2R    | -0.59±0.222  | 0.379±0.587  | 5.67E-20 |
| cg25406518 | 11 | 61102165  | DDB1     | 1.263±0.301  | 0.394±0.518  | 5.67E-20 |
| cg19635695 | 10 | 95372445  | PDE6C    | 0.899±0.298  | -0.036±0.562 | 5.71E-20 |
| cg00292971 | 7  | 143060536 | FAM131B  | 0.297±0.394  | 1.377±0.639  | 5.71E-20 |
| cg03775422 | 7  | 54610192  | VSTM2A   | -3.847±0.411 | -1.769±1.256 | 5.80E-20 |
| cg23113963 | 16 | 23313293  | SCNN1B   | -2.928±0.475 | -1.234±1.025 | 5.81E-20 |
| cg23097006 | 20 | 25063817  | VSX1     | -3.348±0.388 | -1.34±1.214  | 6.06E-20 |
| cg14721213 | 1  | 171154612 | FMO2     | 0.035±0.269  | 0.989±0.577  | 6.30E-20 |
| cg21376883 | 1  | 236850232 | ACTN2    | -2.452±0.422 | -0.882±0.952 | 6.31E-20 |
| cg26555310 | 1  | 68914717  | RPE65    | 1.447±0.354  | 2.487±0.622  | 6.32E-20 |
| cg19408398 | 4  | 54243328  | FIP1L1   | -0.482±0.258 | 0.241±0.43   | 6.40E-20 |
| cg13678049 | 6  | 43149356  | CUL9     | -0.274±0.195 | 0.667±0.571  | 6.54E-20 |
| cg13302823 | 8  | 145559792 | SCRT1    | -1.18±0.268  | -0.058±0.681 | 6.67E-20 |
| cg00201234 | 3  | 13590968  | FBLN2    | -2.117±0.337 | -0.806±0.797 | 6.76E-20 |
| cg23326689 | 8  | 80523461  | STMN2    | -2.098±0.352 | -0.608±0.905 | 6.81E-20 |
| cg27603796 | 7  | 117512803 | CTTNBP2  | -3.042±0.363 | -1.554±0.904 | 7.02E-20 |
| cg20714328 | 5  | 79331850  | THBS4    | 1.549±0.341  | 2.324±0.44   | 7.29E-20 |
| cg26134665 | 16 | 31021544  | STX1B    | 0.454±0.122  | 1.176±0.437  | 7.50E-20 |
| cg09067967 | 4  | 39529342  | UGDH-AS1 | -3.2±0.59    | -1.928±0.704 | 7.52E-20 |
| cg07730329 | 5  | 140810137 | PCDHGA12 | -2.406±0.329 | -0.85±0.947  | 8.21E-20 |
| cg19576304 | 18 | 56940022  | RAX      | -3.119±0.335 | -1.39±1.052  | 8.39E-20 |
| cg03996822 | 4  | 74486558  | RASSF6   | 0.037±0.226  | -1.046±0.66  | 8.41E-20 |
| cg03802191 | 1  | 234615169 | TARBP1   | 0.814±0.147  | -0.029±0.512 | 8.45E-20 |
| cg10140638 | 2  | 220174207 | PTPRN    | -4.295±0.602 | -2.002±1.398 | 8.46E-20 |
| cg25938646 | 13 | 84456681  | SLITRK1  | -3.462±0.42  | -1.683±1.085 | 8.51E-20 |
| cg18940763 | 22 | 29197846  | XBP1     | -0.057±0.474 | -1.383±0.794 | 8.59E-20 |
| cg11474811 | 11 | 2443869   | TRPM5    | 1.776±0.244  | 0.785±0.604  | 8.62E-20 |
| cg10335112 | 11 | 195572    | ODF3     | 0.168±0.206  | -0.762±0.568 | 8.88E-20 |
| cg08214029 | 17 | 34391478  | CCL18    | 0.048±0.263  | -1.066±0.681 | 9.48E-20 |
| cg21105318 | 2  | 161056520 | ITGB6    | 1.116±0.35   | -0.127±0.75  | 9.52E-20 |
| cg25465406 | 17 | 7906098   | GUCY2D   | -3.848±0.414 | -1.729±1.293 | 9.73E-20 |
| cg11965370 | 11 | 131780946 | NTM      | -2.625±0.563 | -0.812±1.102 | 1.00E-19 |

|            |    |           |           |              |              |          |
|------------|----|-----------|-----------|--------------|--------------|----------|
| cg20573420 | 19 | 35451129  | ZNF792    | 1.96±0.381   | 2.624±0.289  | 1.00E-19 |
| cg06165395 | 1  | 37500790  | GRIK3     | -2.502±0.279 | -1.25±0.766  | 1.04E-19 |
| cg15539420 | 17 | 46692248  | HOXB8     | -1.69±0.279  | -0.036±1.009 | 1.10E-19 |
| cg06432655 | 19 | 36523405  | CLIP3     | -1.131±0.286 | 0.163±0.793  | 1.12E-19 |
| cg15760840 | 7  | 27225222  | HOXA11-AS | -4.152±0.506 | -1.688±1.51  | 1.16E-19 |
| cg24989962 | 14 | 52734286  | PTGDR     | -3.068±0.538 | -0.928±1.313 | 1.16E-19 |
| cg22730004 | 1  | 158656718 | SPTA1     | -0.216±0.284 | -1.632±0.857 | 1.18E-19 |
| cg26060255 | 20 | 3025968   | MRPS26    | -0.865±0.225 | -1.547±0.414 | 1.21E-19 |
| cg06263495 | 11 | 2292004   | ASCL2     | -2.216±0.419 | -0.247±1.209 | 1.22E-19 |
| cg19979896 | 6  | 150212118 | RAET1E    | -0.633±0.237 | 0.124±0.461  | 1.22E-19 |
| cg25598083 | 14 | 74034893  | ACOT2     | 0.519±0.346  | -0.578±0.669 | 1.25E-19 |
| cg18267381 | 3  | 21792434  | ZNF385D   | -2.007±0.375 | -0.547±0.897 | 1.25E-19 |
| cg05368341 | 1  | 114696465 | SYT6      | -4.499±0.557 | -2.56±1.19   | 1.31E-19 |
| cg23696949 | 1  | 183155644 | LAMC2     | -0.083±0.296 | -1.283±0.738 | 1.33E-19 |
| cg08977371 | 16 | 82660490  | CDH13     | -2.621±0.246 | -1.238±0.847 | 1.34E-19 |
| cg15128898 | 5  | 35618029  | SPEF2     | -1.779±0.597 | -3.334±0.929 | 1.37E-19 |
| cg03700462 | 7  | 27135684  | HOTAIRM1  | -4.348±0.434 | -2.059±1.406 | 1.37E-19 |
| cg03109316 | 3  | 113957903 | ZNF80     | 2.479±0.306  | 0.765±1.051  | 1.37E-19 |
| cg20848130 | 1  | 228337776 | GJC2      | 0.841±0.217  | 1.685±0.519  | 1.41E-19 |
| cg17906786 | 13 | 37247708  | SERTM1    | -1.374±0.292 | -0.502±0.53  | 1.42E-19 |
| cg22658979 | 11 | 102826469 | MMP13     | 2.602±0.226  | 1.062±0.943  | 1.49E-19 |
| cg02889982 | 17 | 16946247  | MPRIP     | -0.806±0.155 | -0.456±0.201 | 1.49E-19 |
| cg03811478 | 3  | 137483696 | SOX14     | -1.801±0.262 | -0.926±0.537 | 1.52E-19 |
| cg06295856 | 11 | 14993642  | CALCA     | -2.992±0.56  | -1.358±0.994 | 1.54E-19 |
| cg03589001 | 15 | 79164714  | MORF4L1   | -0.074±0.246 | 0.705±0.477  | 1.55E-19 |
| cg14166009 | 19 | 37825309  | HKR1      | -1.234±0.369 | 0.153±0.856  | 1.59E-19 |
| cg07044282 | 1  | 178840137 | ANGPTL1   | -0.292±0.282 | 0.638±0.572  | 1.61E-19 |
| cg09191626 | 11 | 13983986  | SPON1     | -1.596±0.225 | -0.346±0.769 | 1.62E-19 |
| cg26247501 | 1  | 89642561  | GBP7      | 0.71±0.306   | 1.45±0.424   | 1.63E-19 |
| cg09179845 | 5  | 40909532  | C7        | -1.638±0.322 | -0.277±0.84  | 1.63E-19 |
| cg16092786 | 11 | 32455735  | WT1       | -3.309±0.412 | -1.854±0.898 | 1.70E-19 |
| cg10061138 | 3  | 52529085  | STAB1     | 0.088±0.14   | 0.817±0.449  | 1.70E-19 |
| cg03312532 | 15 | 90166033  | TICRR     | 0.898±0.28   | 1.667±0.466  | 1.71E-19 |
| cg04981492 | 19 | 15218713  | SYDE1     | -2.833±0.315 | -1.174±1.023 | 1.73E-19 |
| cg13266292 | 19 | 1438084   | RPS15     | -1.521±0.215 | -2.278±0.467 | 1.76E-19 |
| cg04317399 | 7  | 27170313  | HOXA4     | -1.074±0.59  | 0.174±0.698  | 1.77E-19 |
| cg21275690 | 16 | 3072970   | THOC6     | 0.372±0.255  | -0.342±0.433 | 1.80E-19 |
| cg11376198 | 1  | 19600730  | AKR7L     | -1.382±0.767 | 0.157±0.833  | 1.85E-19 |
| cg25974617 | 8  | 71520962  | LOC286190 | 0.136±0.179  | -0.922±0.652 | 1.85E-19 |
| cg14552982 | 9  | 133568226 | EXOSC2    | -0.091±0.279 | 0.696±0.468  | 1.95E-19 |
| cg14991487 | 2  | 176987404 | HOXD9     | -3.55±0.547  | -0.951±1.61  | 1.96E-19 |
| cg02780849 | 1  | 235814163 | GNG4      | -2.877±0.555 | -1.563±0.773 | 2.04E-19 |
| cg03013422 | 12 | 125550350 | AACS      | -3.432±0.374 | -4.271±0.485 | 2.04E-19 |
| cg21792432 | 7  | 124538660 | POT1      | 0.619±0.325  | 1.363±0.433  | 2.10E-19 |
| cg03662459 | 9  | 34654290  | IL11RA    | 0.737±0.193  | 1.37±0.391   | 2.15E-19 |
| cg13603551 | 7  | 150549406 | AOC1      | 0.687±0.225  | -0.244±0.578 | 2.17E-19 |
| cg10266490 | 1  | 55013709  | ACOT11    | -2.217±0.372 | -0.809±0.874 | 2.19E-19 |
| cg22679120 | 7  | 2353402   | SNX8      | -0.179±0.193 | -1.098±0.57  | 2.21E-19 |
| cg16787600 | 10 | 106400880 | SORCS3    | -3.123±0.443 | -1.21±1.19   | 2.33E-19 |
| cg22485810 | 17 | 29248725  | ADAP2     | -1.23±0.251  | -2.061±0.514 | 2.34E-19 |
| cg04059863 | 3  | 121741630 | ILDR1     | 1.922±0.362  | 0.501±0.884  | 2.37E-19 |
| cg26153642 | 3  | 183818368 | HTR3E     | 1.709±0.345  | 2.356±0.331  | 2.37E-19 |
| cg01882150 | 11 | 63933998  | MACROD1   | -3.535±0.343 | -4.223±0.375 | 2.38E-19 |
| cg13397379 | 1  | 247696628 | OR2C3     | 1.786±0.334  | 0.159±1.011  | 2.42E-19 |
| cg15166089 | 1  | 27710030  | CD164L2   | 1.212±0.15   | 0.393±0.508  | 2.44E-19 |
| cg17240454 | 6  | 34524278  | SPDEF     | 1.547±0.223  | 0.449±0.683  | 2.47E-19 |
| cg18462653 | 20 | 29978176  | DEFB119   | 0.852±0.273  | -0.528±0.858 | 2.52E-19 |
| cg15037004 | 5  | 71803938  | ZNF366    | -0.688±0.282 | 0.114±0.492  | 2.53E-19 |
| cg01965939 | 5  | 148442694 | SH3TC2    | -1.985±0.418 | -0.635±0.836 | 2.55E-19 |
| cg16954341 | 6  | 25652381  | SCGN      | -2.001±0.32  | -0.618±0.863 | 2.76E-19 |
| cg20916523 | 3  | 10184584  | VHL       | 0.785±0.396  | -0.595±0.859 | 2.82E-19 |
| cg06621358 | 3  | 48699637  | CELSR3    | -1.942±0.281 | -0.707±0.772 | 3.02E-19 |
| cg01999333 | 19 | 15162623  | CASP14    | 0.869±0.311  | -0.204±0.669 | 3.03E-19 |
| cg14036856 | 1  | 43751563  | C1orf210  | 0.375±0.26   | -0.81±0.741  | 3.09E-19 |
| cg04809787 | 17 | 7348339   | CHRNA1    | -1.73±0.378  | -2.867±0.703 | 3.11E-19 |
| cg03872376 | 1  | 238053828 | ZIP4      | 1.217±0.234  | -0.174±0.866 | 3.14E-19 |
| cg27442349 | 19 | 39389219  | NFKB1B    | 1.18±0.345   | 1.942±0.441  | 3.15E-19 |
| cg14826683 | 1  | 153013830 | SPRR2D    | 0.849±0.377  | -0.512±0.85  | 3.19E-19 |
| cg13549845 | 4  | 93225960  | GRID2     | -2.951±0.393 | -1.368±0.99  | 3.23E-19 |
| cg18119407 | 2  | 201980504 | CFLAR     | -0.222±0.254 | -0.999±0.482 | 3.28E-19 |

|            |    |           |           |              |              |          |
|------------|----|-----------|-----------|--------------|--------------|----------|
| cg21269897 | 6  | 27107002  | HIST1H4I  | -2.373±0.327 | -0.734±1.025 | 3.29E-19 |
| cg09801065 | 5  | 150949152 | FAT2      | 0.09±0.251   | -0.7±0.49    | 3.31E-19 |
| cg11375102 | 16 | 1583810   | TMEM204   | -0.673±0.246 | 0.261±0.585  | 3.41E-19 |
| cg04490714 | 16 | 55690564  | SLC6A2    | -3.394±0.655 | -1.417±1.225 | 3.46E-19 |
| cg23303408 | 5  | 145718597 | POU4F3    | -3.178±0.413 | -1.52±1.039  | 3.53E-19 |
| cg09872616 | 7  | 130126182 | MEST      | -0.696±0.196 | -1.615±0.575 | 3.55E-19 |
| cg00489401 | 5  | 180075875 | FLT4      | -2.844±0.658 | -0.88±1.217  | 3.56E-19 |
| cg12447832 | 2  | 3383257   | TRAPPC12  | -0.38±0.297  | -1.376±0.622 | 3.58E-19 |
| cg13279585 | 2  | 89630389  | 0         | 0.402±0.228  | -0.554±0.6   | 3.62E-19 |
| cg16902509 | 10 | 15761312  | ITGA8     | -2.343±0.293 | -0.945±0.877 | 3.71E-19 |
| cg02512860 | 7  | 100880751 | CLDN15    | 1.165±0.372  | 1.995±0.485  | 3.74E-19 |
| cg05782445 | 2  | 26915207  | KCNK3     | -1.467±0.246 | -0.66±0.504  | 3.75E-19 |
| cg27285599 | 17 | 80798023  | ZNF750    | 1.776±0.396  | 0.405±0.858  | 3.84E-19 |
| cg14294758 | 3  | 116163694 | LSAMP     | -3.257±0.372 | -1.628±1.023 | 3.85E-19 |
| cg20588069 | 4  | 4860439   | MSX1      | -1.613±0.258 | -0.395±0.764 | 3.85E-19 |
| cg07639720 | 15 | 83952875  | BNC1      | -3.848±0.469 | -2.599±0.765 | 3.98E-19 |
| cg07027075 | 4  | 39461721  | LIAS      | -1.884±0.271 | -2.696±0.504 | 3.99E-19 |
| cg10683939 | 16 | 73178242  | C16orf47  | -0.131±0.319 | 0.943±0.673  | 4.00E-19 |
| cg19530885 | 5  | 147258132 | SCGB3A2   | 0.27±0.218   | -0.71±0.616  | 4.07E-19 |
| cg27456885 | 21 | 31972913  | KRTAP22-1 | 1.926±0.239  | 0.705±0.767  | 4.16E-19 |
| cg02812142 | 2  | 135595323 | ACMSD     | 1.294±0.259  | 0.294±0.629  | 4.21E-19 |
| cg24130010 | 21 | 19617176  | CHODL     | -2.184±0.405 | -0.49±1.067  | 4.39E-19 |
| cg26394380 | 2  | 85896001  | SFTPB     | 0.873±0.194  | 0.056±0.514  | 4.41E-19 |
| cg02442161 | 20 | 43803637  | PI3       | 1.699±0.347  | 0.329±0.863  | 4.47E-19 |
| cg05436231 | 1  | 27709789  | CD164L2   | -0.086±0.272 | -1.212±0.71  | 4.60E-19 |
| cg10923408 | 13 | 31506710  | TEX26-AS1 | -0.428±0.275 | 0.522±0.597  | 4.60E-19 |
| cg00750606 | 1  | 20899121  | 0         | 0.903±0.32   | -0.34±0.783  | 4.66E-19 |
| cg15227982 | 10 | 104535854 | WBP1L     | -1.865±0.477 | -0.584±0.788 | 4.71E-19 |
| cg10331038 | 1  | 175376028 | TNR       | 1.597±0.236  | 0.117±0.928  | 4.81E-19 |
| cg04315771 | 19 | 50433949  | NUP62     | -0.895±0.315 | 0.274±0.736  | 4.85E-19 |
| cg26090660 | 4  | 80747125  | PCAT4     | 2.131±0.347  | 1.497±0.324  | 4.91E-19 |
| cg16415058 | 10 | 108923781 | SORCS1    | -2.255±0.35  | -1.214±0.649 | 5.01E-19 |
| cg10636246 | 1  | 159046973 | AIM2      | -0.302±0.438 | -1.854±0.978 | 5.07E-19 |
| cg26717133 | 10 | 85953953  | CDHR1     | 0.148±0.235  | 0.932±0.493  | 5.07E-19 |
| cg12493906 | 11 | 5009311   | MMP26     | 2.139±0.26   | 0.649±0.938  | 5.10E-19 |
| cg03103192 | 4  | 52917271  | SPATA18   | 0.792±0.234  | -0.131±0.583 | 5.39E-19 |
| cg24621042 | 14 | 94857275  | SERPINA1  | -0.049±0.173 | -0.847±0.504 | 5.48E-19 |
| cg03522063 | 10 | 119302167 | EMX2      | -3.873±0.438 | -1.905±1.245 | 5.54E-19 |
| cg01671575 | 1  | 230513566 | PGBD5     | 2.335±0.287  | 3.094±0.468  | 5.54E-19 |
| cg01598642 | 11 | 5272039   | HBG1      | 2.379±0.235  | 0.875±0.947  | 5.69E-19 |
| cg04806409 | 21 | 43735505  | TFF3      | 1.309±0.311  | 0.121±0.752  | 5.97E-19 |
| cg17181653 | 6  | 144417537 | SF3B5     | 0.922±0.329  | -0.148±0.674 | 6.01E-19 |
| cg11393848 | 1  | 22969340  | C1QC      | -0.699±0.143 | -1.416±0.453 | 6.08E-19 |
| cg25766774 | 3  | 45018909  | EXOSC7    | -0.408±0.339 | 0.696±0.696  | 6.11E-19 |
| cg00030047 | 1  | 6268790   | RNF207    | 0.018±0.293  | 1.257±0.785  | 6.12E-19 |
| cg07525077 | 14 | 21359943  | RNASE3    | 0.696±0.322  | -0.678±0.871 | 6.17E-19 |
| cg19324627 | 11 | 116708329 | APOA1     | 1.437±0.306  | 2.159±0.435  | 6.19E-19 |
| cg24748945 | 19 | 4123852   | MAP2K2    | -2.216±0.489 | -1.389±0.37  | 6.30E-19 |
| cg23300372 | 5  | 71015432  | CARTPT    | -3.929±0.486 | -1.891±1.292 | 6.37E-19 |
| cg05208878 | 22 | 22901596  | PRAME     | 0.204±0.215  | -0.414±0.387 | 6.40E-19 |
| cg09009380 | 1  | 201252974 | PKP1      | -0.689±0.378 | 0.368±0.659  | 6.41E-19 |
| cg14722162 | 5  | 134783186 | C5orf20   | 0.924±0.259  | -0.128±0.668 | 6.89E-19 |
| cg16422907 | 13 | 37006734  | Ccna1     | -2.416±0.299 | -0.889±0.968 | 6.99E-19 |
| cg22815110 | 1  | 63788933  | FOXD3     | -2.53±0.603  | -0.676±1.168 | 7.18E-19 |
| cg23984130 | 2  | 89215185  | 0         | 2.323±0.26   | 0.717±1.016  | 7.19E-19 |
| cg13878010 | 3  | 123167276 | ADCY5     | -3.092±0.477 | -0.773±1.474 | 7.31E-19 |
| cg20542190 | 19 | 54850619  | LILRA4    | -0.539±0.232 | -1.462±0.587 | 7.32E-19 |
| cg25356886 | 2  | 208988967 | CRYGD     | 0.026±0.17   | 0.677±0.414  | 7.32E-19 |
| cg06051311 | 6  | 30131001  | TRIM15    | 0.798±0.413  | -0.711±0.958 | 7.34E-19 |
| cg02989940 | 16 | 31539234  | AHSP      | 1.987±0.396  | 0.564±0.904  | 7.65E-19 |
| cg09068492 | 11 | 14993658  | CALCA     | -3.197±0.483 | -1.49±1.085  | 7.71E-19 |
| cg16142218 | 8  | 23101221  | CHMP7     | 0.055±0.314  | -1.109±0.741 | 8.06E-19 |
| cg02452985 | 14 | 99737548  | BCL11B    | -4.402±0.788 | -1.877±1.599 | 8.28E-19 |
| cg24507762 | 20 | 48099890  | KCNB1     | -1.912±0.348 | -0.869±0.657 | 8.35E-19 |
| cg14008883 | 10 | 50818911  | SLC18A3   | -2.269±0.466 | -0.734±0.974 | 8.36E-19 |
| cg19418515 | 15 | 67539555  | AAGAB     | 1.358±0.224  | 0.767±0.367  | 8.36E-19 |
| cg23293787 | 20 | 49576382  | MOCS3     | 2.304±0.434  | 3.179±0.497  | 8.45E-19 |
| cg20313722 | 19 | 47248003  | FKRP      | 0.827±0.175  | 1.439±0.39   | 8.65E-19 |
| cg11500797 | 7  | 96652123  | DLX5      | -2.05±0.401  | -0.419±1.041 | 9.14E-19 |
| cg20404387 | 1  | 20879296  | FAM43B    | -3.113±0.39  | -1.573±0.983 | 9.30E-19 |

|            |    |           |            |              |              |          |
|------------|----|-----------|------------|--------------|--------------|----------|
| cg15895197 | 2  | 27301490  | EMILIN1    | -0.519±0.166 | 0.093±0.391  | 9.44E-19 |
| cg19306866 | 21 | 31970997  | 0          | 2.532±0.318  | 0.983±0.991  | 1.04E-18 |
| cg22061523 | 17 | 76183551  | AFMID      | -2.482±0.323 | -3.142±0.379 | 1.04E-18 |
| cg16779976 | 10 | 98031125  | BLNK       | -1.503±0.298 | -2.381±0.555 | 1.04E-18 |
| cg04330449 | 5  | 134871166 | NEUROG1    | -2.211±0.656 | -0.52±1.051  | 1.05E-18 |
| cg18236477 | 13 | 26043066  | ATP8A2     | -2.393±0.348 | -0.561±1.171 | 1.05E-18 |
| cg21418052 | 13 | 31773806  | B3GAL TL   | -0.469±0.201 | -0.982±0.318 | 1.05E-18 |
| cg17199483 | 16 | 16042767  | ABCC1      | -1.529±0.355 | -2.409±0.542 | 1.05E-18 |
| cg03064067 | 12 | 85306916  | SLC6A15    | -2.631±0.329 | -1.013±1.036 | 1.07E-18 |
| cg25737664 | 20 | 1538671   | SIRPD      | 2.893±0.199  | 1.133±1.118  | 1.08E-18 |
| cg17827767 | 10 | 86001154  | LRIT1      | 1.63±0.322   | 0.357±0.816  | 1.10E-18 |
| cg05440289 | 1  | 152881119 | IVL        | 2.2±0.415    | 0.352±1.185  | 1.12E-18 |
| cg20792062 | 12 | 5153288   | KCNA5      | -2.094±0.484 | -0.74±0.853  | 1.13E-18 |
| cg24496666 | 1  | 78511979  | GIPC2      | -3.684±0.403 | -1.539±1.374 | 1.14E-18 |
| cg07675682 | 17 | 78195515  | SLC26A11   | 0.693±0.237  | 1.212±0.308  | 1.15E-18 |
| cg06353345 | 11 | 5322976   | OR51B4     | 0.865±0.284  | -0.528±0.893 | 1.17E-18 |
| cg14564494 | 21 | 37506911  | CBR3       | -1.048±0.277 | -2.137±0.699 | 1.18E-18 |
| cg11354906 | 4  | 154710371 | SFRP2      | -3.341±0.312 | -1.579±1.128 | 1.19E-18 |
| cg16173067 | 20 | 1309722   | SDCBP2     | 1.919±0.294  | 0.669±0.802  | 1.20E-18 |
| cg17966192 | 2  | 108994116 | SULT1C4    | -2.334±0.48  | -1.148±0.734 | 1.22E-18 |
| cg00037763 | 18 | 42281763  | SETBP1     | 3.18±0.279   | 1.489±1.083  | 1.26E-18 |
| cg17166812 | 1  | 161169574 | NDUFS2     | -1.75±0.302  | -0.793±0.611 | 1.28E-18 |
| cg20367961 | 1  | 41950237  | EDN2       | 1.176±0.171  | 0.423±0.484  | 1.31E-18 |
| cg05598246 | 6  | 29624414  | MOG        | 0.437±0.276  | 1.316±0.562  | 1.33E-18 |
| cg15627025 | 19 | 55327906  | KIR3DL1    | 2.523±0.205  | 1.336±0.762  | 1.38E-18 |
| cg03131527 | 3  | 197301250 | BDH1       | -0.892±0.312 | 0.11±0.641   | 1.39E-18 |
| cg12614105 | 7  | 24324435  | NPY        | -2.911±0.358 | -1.128±1.147 | 1.40E-18 |
| cg24092914 | 3  | 10184877  | VHL        | 0.408±0.489  | -0.787±0.74  | 1.46E-18 |
| cg22319147 | 16 | 66400599  | CDH5       | 0.465±0.182  | 1.418±0.614  | 1.47E-18 |
| cg26557658 | 1  | 20878787  | FAM43B     | -3.269±0.306 | -1.797±0.949 | 1.49E-18 |
| cg11122968 | 19 | 51727295  | CD33       | 0.535±0.286  | -0.322±0.547 | 1.49E-18 |
| cg02489552 | 19 | 15121531  | CCDC105    | -1.67±0.329  | -0.695±0.621 | 1.55E-18 |
| cg09099744 | 9  | 21968372  | CDKN2A     | -3.726±0.454 | -1.105±1.688 | 1.59E-18 |
| cg02423618 | 15 | 97325725  | SPATA8-AS1 | 0.691±0.151  | -0.145±0.538 | 1.62E-18 |
| cg09112782 | 13 | 115047484 | UPF3A      | -2.976±0.356 | -2.11±0.537  | 1.63E-18 |
| cg15489301 | 7  | 134213038 | AKR1B10    | -1.29±0.397  | -2.153±0.516 | 1.64E-18 |
| cg10883303 | 7  | 27239024  | HOXA13     | -3.542±0.586 | -1.212±1.505 | 1.64E-18 |
| cg06038133 | 17 | 27944585  | CORO6      | -0.043±0.309 | -1.587±0.997 | 1.71E-18 |
| cg13038560 | 2  | 200819113 | C2orf47    | 2.052±0.398  | 0.789±0.811  | 1.75E-18 |
| cg16446783 | 11 | 18193360  | MRGPRX4    | 1.134±0.284  | 0.041±0.707  | 1.75E-18 |
| cg11208483 | 13 | 95364233  | SOX21      | -1.491±0.197 | -0.819±0.434 | 1.75E-18 |
| cg03734874 | 14 | 105071382 | TMEM179    | -1.763±0.601 | -0.195±0.988 | 1.76E-18 |
| cg11911951 | 16 | 1430216   | UNKL       | 2.238±0.188  | 1.173±0.688  | 1.79E-18 |
| cg05810550 | 8  | 7343451   | DEFB106B   | 1.72±0.278   | 0.618±0.713  | 1.83E-18 |
| cg07773116 | 10 | 48438500  | GDF10      | -2.831±0.436 | -1.511±0.846 | 1.84E-18 |
| cg01119135 | 1  | 207205525 | C1orf116   | 0.664±0.289  | -0.594±0.815 | 1.85E-18 |
| cg23867494 | 1  | 1150322   | TNFRSF4    | 0.353±0.246  | -0.726±0.699 | 1.86E-18 |
| cg24215443 | 6  | 134210598 | TCF21      | -1.367±0.358 | -0.365±0.638 | 1.86E-18 |
| cg19594666 | 7  | 127881280 | LEP        | -0.74±0.428  | 0.469±0.771  | 1.90E-18 |
| cg19064258 | 16 | 22826117  | HS3ST2     | -2.778±0.369 | -1.005±1.149 | 1.91E-18 |
| cg14419187 | 2  | 210637094 | UNC80      | -2.574±0.44  | -0.712±1.207 | 1.91E-18 |
| cg23499956 | 1  | 153584920 | S100A16    | 0.346±0.209  | -0.619±0.625 | 1.93E-18 |
| cg02789485 | 12 | 75783428  | GLIPR1L2   | -1.557±0.264 | -0.341±0.789 | 2.01E-18 |
| cg19220825 | 12 | 50353951  | AQP5       | -1.768±0.336 | -2.502±0.443 | 2.03E-18 |
| cg06151165 | 20 | 25062254  | VSX1       | -4.324±0.73  | -2.147±1.397 | 2.06E-18 |
| cg16463460 | 11 | 32454718  | WT1        | -0.866±0.301 | 0.073±0.605  | 2.07E-18 |
| cg13246269 | 9  | 33403037  | AQP7       | 0.452±0.145  | 0.074±0.239  | 2.07E-18 |
| cg17963840 | 8  | 26722861  | ADRA1A     | -1.849±0.264 | -0.682±0.758 | 2.07E-18 |
| cg07260592 | 6  | 161100122 | 0          | -1.309±0.489 | -0.042±0.799 | 2.09E-18 |
| cg24599942 | 8  | 41386345  | GINS4      | -0.66±0.318  | -1.477±0.515 | 2.09E-18 |
| cg13807496 | 11 | 44332540  | ALX4       | -3.188±0.287 | -1.952±0.802 | 2.10E-18 |
| cg18328933 | 3  | 52008538  | ABHD14B    | 1.183±0.2    | 0.396±0.511  | 2.10E-18 |
| cg20158248 | 16 | 16042956  | ABCC1      | -3.221±0.392 | -4.013±0.461 | 2.17E-18 |
| cg13944141 | 0  | 0         | 0          | 0.868±0.316  | -0.295±0.755 | 2.18E-18 |
| cg05508084 | 19 | 56988398  | ZNF667     | -2.917±0.361 | -1.315±1.042 | 2.27E-18 |
| cg09945801 | 8  | 30890139  | PURG       | -1.262±0.257 | -0.109±0.751 | 2.34E-18 |
| cg10498097 | 2  | 219221131 | C2orf62    | 1.971±0.216  | 0.896±0.699  | 2.40E-18 |
| cg18669588 | 3  | 52274051  | TWF2       | 1.146±0.2    | 0.426±0.468  | 2.43E-18 |
| cg20377955 | 7  | 20827825  | SP8        | -1.812±0.233 | -0.487±0.861 | 2.48E-18 |
| cg14134005 | 8  | 11563042  | GATA4      | -2.743±0.24  | -1.455±0.838 | 2.52E-18 |

|            |    |           |                     |              |              |          |
|------------|----|-----------|---------------------|--------------|--------------|----------|
| cg19025034 | 19 | 49198900  | <i>FUT2</i>         | 2.532±0.281  | 1.624±0.588  | 2.53E-18 |
| cg10751811 | 1  | 47533976  | <i>CYP4Z1</i>       | -0.328±0.274 | 0.688±0.662  | 2.53E-18 |
| cg18693704 | 16 | 66731313  | <i>CMTM4</i>        | -2.126±0.287 | -2.881±0.48  | 2.55E-18 |
| cg16003238 | 15 | 65670876  | <i>IGDCC3</i>       | -0.815±0.255 | 0.077±0.58   | 2.59E-18 |
| cg00512279 | 10 | 119000991 | <i>SLC18A2</i>      | -5.086±0.619 | -2.986±1.364 | 2.60E-18 |
| cg02774439 | 4  | 174451251 | <i>HAND2</i>        | -3.358±0.318 | -1.375±1.289 | 2.64E-18 |
| cg07072643 | 19 | 14785593  | <i>EMR3</i>         | 0.391±0.376  | -0.662±0.675 | 2.66E-18 |
| cg21043558 | 7  | 140625365 | <i>BRAF</i>         | -0.627±0.3   | 0.389±0.636  | 2.67E-18 |
| cg10681065 | 7  | 100239172 | <i>TFR2</i>         | 0.264±0.19   | 1.177±0.595  | 2.68E-18 |
| cg26590537 | 12 | 5020202   | <i>KCNA1</i>        | -3.944±0.423 | -2.331±1.052 | 2.73E-18 |
| cg18410627 | 9  | 129677882 | <i>RALGPS1</i>      | -3.402±0.335 | -4.208±0.504 | 2.76E-18 |
| cg06627364 | 2  | 87755088  | <i>LINC00152</i>    | -2.877±0.397 | -4.185±0.85  | 2.87E-18 |
| cg13548361 | 10 | 104178949 | <i>PSD</i>          | -3.962±0.44  | -2.62±0.869  | 2.89E-18 |
| cg03538436 | 12 | 117799370 | <i>NOS1</i>         | -3.609±0.432 | -1.913±1.108 | 2.89E-18 |
| cg25612480 | 8  | 48920460  | <i>UBE2V2</i>       | 1.759±0.404  | 0.486±0.827  | 2.98E-18 |
| cg22424444 | 11 | 1331736   | <i>TOLLIP-AS1</i>   | 2.234±0.451  | 0.745±0.969  | 2.99E-18 |
| cg01095482 | 1  | 43765796  | <i>TIE1</i>         | 2.573±0.278  | 3.195±0.383  | 3.20E-18 |
| cg25004981 | 15 | 101085028 | <i>CERS3</i>        | 2.196±0.635  | 3.273±0.532  | 3.24E-18 |
| cg14547335 | 3  | 10491247  | <i>ATP2B2</i>       | 2.858±0.454  | 1.346±0.987  | 3.26E-18 |
| cg09674215 | 7  | 19158134  | <i>TWIST1</i>       | -2.98±0.271  | -1.546±0.938 | 3.26E-18 |
| cg02764897 | 21 | 31768311  | <i>KRTAP13-1</i>    | 0.818±0.24   | -0.653±0.961 | 3.28E-18 |
| cg10054857 | 18 | 61816543  | <i>LINC00305</i>    | 1.538±0.273  | 0.064±0.964  | 3.28E-18 |
| cg04720330 | 11 | 2949813   | <i>PHLDA2</i>       | -1.968±0.35  | -3.07±0.717  | 3.29E-18 |
| cg02757432 | 10 | 125426048 | <i>GPR26</i>        | -1.42±0.446  | -0.181±0.798 | 3.33E-18 |
| cg02721374 | 17 | 2996177   | <i>OR1D2</i>        | 1.969±0.289  | 0.831±0.746  | 3.37E-18 |
| cg06993413 | 15 | 65810204  | <i>DPP8</i>         | -3.516±0.312 | -4.32±0.513  | 3.40E-18 |
| cg23410113 | 2  | 202149083 | <i>CASP8</i>        | 2.094±0.247  | 1.444±0.415  | 3.44E-18 |
| cg20070090 | 1  | 153363489 | <i>S100A8</i>       | 0.197±0.211  | -0.8±0.654   | 3.56E-18 |
| cg06445611 | 6  | 90025053  | <i>GABRR2</i>       | 2.28±0.232   | 2.838±0.351  | 3.63E-18 |
| cg20050826 | 12 | 52995295  | <i>KRT72</i>        | -1.737±0.426 | -0.444±0.841 | 3.67E-18 |
| cg15105987 | 3  | 181430317 | <i>SOX2</i>         | -1.289±0.204 | -0.583±0.463 | 3.70E-18 |
| cg04448487 | 20 | 42875777  | <i>GDAP1L1</i>      | -2.813±0.297 | -0.799±1.317 | 3.72E-18 |
| cg19514928 | 1  | 95583636  | <i>TMEM56-RWDD3</i> | -4.173±0.33  | -4.84±0.395  | 3.82E-18 |
| cg01720520 | 19 | 55127892  | <i>LILRB1</i>       | -0.443±0.282 | -1.083±0.397 | 3.85E-18 |
| cg00503840 | 7  | 96650509  | <i>DLX5</i>         | -0.086±0.166 | 0.71±0.523   | 3.89E-18 |
| cg12989650 | 17 | 8213328   | <i>ARHGEF15</i>     | -0.119±0.278 | 0.58±0.445   | 4.04E-18 |
| cg12865837 | 6  | 100911526 | <i>SIM1</i>         | -2.245±0.367 | -1.036±0.791 | 4.05E-18 |
| cg04994456 | 1  | 20141662  | <i>RNF186</i>       | 1.191±0.257  | 0.066±0.741  | 4.17E-18 |
| cg14532417 | 17 | 34503322  | <i>TBC1D3B</i>      | 1.86±0.304   | 1.077±0.501  | 4.20E-18 |
| cg11398517 | 20 | 42355625  | <i>GTSF1L</i>       | 0.169±0.282  | 1.139±0.636  | 4.24E-18 |
| cg03789934 | 19 | 56342665  | <i>NLRP11</i>       | 0.126±0.199  | -0.655±0.514 | 4.28E-18 |
| cg09829319 | 6  | 10882238  | <i>GCM2</i>         | -3.681±0.387 | -1.656±1.333 | 4.36E-18 |
| cg05500015 | 11 | 89867819  | <i>NAALAD2</i>      | -3.721±0.475 | -1.646±1.368 | 4.46E-18 |
| cg18839416 | 1  | 12805849  | <i>C1orf158</i>     | 0.838±0.2    | -0.407±0.819 | 4.51E-18 |
| cg19731122 | 17 | 1396395   | <i>MYO1C</i>        | -0.213±0.161 | 0.365±0.381  | 4.80E-18 |
| cg08535373 | 20 | 37352612  | <i>SLC32A1</i>      | -3.361±0.295 | -1.833±1.008 | 4.80E-18 |
| cg16280667 | 11 | 118754593 | <i>CXCR5</i>        | 2.761±0.256  | 1.77±0.654   | 4.81E-18 |
| cg05788638 | 14 | 94759020  | <i>SERPINA10</i>    | 2.308±0.24   | 0.801±0.992  | 4.89E-18 |
| cg26164184 | 9  | 137771506 | <i>FCN2</i>         | 2.879±0.348  | 1.593±0.849  | 5.11E-18 |
| cg13349425 | 5  | 134783075 | <i>C5orf20</i>      | 0.964±0.294  | -0.225±0.786 | 5.13E-18 |
| cg15435730 | 6  | 50680222  | <i>TFAP2D</i>       | -4.037±0.427 | -1.954±1.377 | 5.14E-18 |
| cg27426707 | 17 | 48639585  | <i>CACNA1G-AS1</i>  | -3.879±0.278 | -2.327±1.024 | 5.19E-18 |
| cg17357062 | 9  | 137810348 | <i>FCN1</i>         | 1.594±0.217  | 0.643±0.629  | 5.19E-18 |
| cg01240931 | 5  | 112074043 | <i>APC</i>          | -0.164±0.169 | 0.513±0.447  | 5.26E-18 |
| cg22988566 | 20 | 44334869  | <i>WFDC10B</i>      | 2.336±0.294  | 1.31±0.677   | 5.38E-18 |
| cg01449591 | 5  | 70320537  | <i>NAIP</i>         | 2.499±0.211  | 1.737±0.503  | 5.54E-18 |
| cg08797106 | 6  | 26021008  | <i>HIST1H3A</i>     | -2.395±0.242 | -1.674±0.472 | 5.63E-18 |
| cg12571423 | 13 | 37006748  | <i>CCNA1</i>        | -2.356±0.322 | -0.919±0.952 | 5.73E-18 |
| cg17449882 | 8  | 67406020  | <i>C8orf46</i>      | 1.928±0.301  | 2.619±0.435  | 6.10E-18 |
| cg22165175 | 1  | 111148915 | <i>KCNA2</i>        | -1.931±0.533 | -0.753±0.732 | 6.12E-18 |
| cg22563815 | 15 | 78856949  | <i>CHRNA5</i>       | 0.208±0.264  | 0.898±0.447  | 6.14E-18 |
| cg23357981 | 18 | 56887785  | <i>GRP</i>          | -3.261±0.461 | -1.961±0.849 | 6.16E-18 |
| cg05421688 | 1  | 179711859 | <i>FAM163A</i>      | -3.945±0.492 | -2.201±1.154 | 6.17E-18 |
| cg25964007 | 17 | 9479910   | <i>WDR16</i>        | -1.473±0.587 | -3.325±1.221 | 6.29E-18 |
| cg04517429 | 4  | 155413618 | <i>DCHS2</i>        | -2.374±0.326 | -1.315±0.699 | 6.33E-18 |
| cg12845808 | 5  | 141338604 | <i>PCDH12</i>       | 0.072±0.208  | 0.761±0.455  | 6.39E-18 |
| cg25229305 | 10 | 118956639 | <i>KCNK18</i>       | 0.76±0.294   | -0.148±0.598 | 6.75E-18 |
| cg12073594 | 20 | 61903495  | <i>ARFGAP1</i>      | -1.981±0.226 | -2.564±0.377 | 6.77E-18 |
| cg00882451 | 16 | 21222863  | <i>ZP2</i>          | 2.157±0.224  | 2.782±0.409  | 6.91E-18 |
| cg10019507 | 20 | 23016315  | <i>SSTR4</i>        | 0.053±0.186  | 0.755±0.466  | 6.96E-18 |

|            |    |           |                   |              |              |          |
|------------|----|-----------|-------------------|--------------|--------------|----------|
| cg03143849 | 11 | 2904951   | <i>CDKN1C</i>     | -1.021±0.394 | -0.14±0.551  | 6.98E-18 |
| cg02748539 | 5  | 524269    | <i>SLC9A3</i>     | -2.969±0.581 | -1.094±1.24  | 7.04E-18 |
| cg25383242 | 16 | 76343663  | <i>CNTNAP4</i>    | 2.393±0.348  | 1.328±0.702  | 7.06E-18 |
| cg02755455 | 1  | 65352382  | <i>JAK1</i>       | 1.669±0.217  | 2.158±0.308  | 7.53E-18 |
| cg10167296 | 1  | 206680628 | <i>RASSF5</i>     | -4.449±0.44  | -5.3±0.499   | 7.62E-18 |
| cg26960719 | 17 | 68071302  | <i>KCNJ16</i>     | 1.096±0.27   | 0.059±0.683  | 8.02E-18 |
| cg22039846 | 19 | 55281253  | <i>KIR2DL1</i>    | 2.671±0.197  | 1.499±0.781  | 8.21E-18 |
| cg05113558 | 8  | 145702343 | <i>FOXH1</i>      | 1.471±0.274  | 0.6±0.578    | 8.37E-18 |
| cg21350115 | 2  | 188312833 | <i>CALCRL</i>     | -1.778±0.339 | -0.619±0.772 | 8.46E-18 |
| cg07103493 | 5  | 128301232 | <i>SLC27A6</i>    | -2.801±0.566 | -1.232±1.029 | 8.65E-18 |
| cg21201572 | 7  | 16844606  | <i>AGR2</i>       | 0.367±0.268  | -0.949±0.879 | 8.77E-18 |
| cg04533291 | 2  | 96930398  | <i>TMEM127</i>    | 3.355±0.355  | 4.046±0.409  | 8.78E-18 |
| cg22472290 | 19 | 52391480  | <i>ZNF577</i>     | -1.288±0.411 | -0.058±0.813 | 8.84E-18 |
| cg04164824 | 19 | 51628196  | <i>SIGLEC9</i>    | -0.509±0.257 | 0.313±0.546  | 8.85E-18 |
| cg25545088 | 6  | 43398446  | <i>ABCC10</i>     | 0.228±0.283  | 0.798±0.344  | 9.02E-18 |
| cg22303211 | 13 | 112722171 | <i>SOX1</i>       | -1.269±0.173 | -0.617±0.436 | 9.36E-18 |
| cg00585790 | 2  | 109204845 | <i>LIMS1</i>      | -0.296±0.342 | 0.625±0.604  | 9.53E-18 |
| cg24377133 | 8  | 144170375 | <i>0</i>          | -1.942±0.348 | -2.879±0.614 | 9.63E-18 |
| cg14882700 | 4  | 4228571   | <i>OTOP1</i>      | -1.912±0.374 | -0.562±0.903 | 1.01E-17 |
| cg25574024 | 11 | 2161894   | <i>IGF2-AS</i>    | -2.921±0.836 | -1.026±1.202 | 1.02E-17 |
| cg16886259 | 13 | 49281222  | <i>CYSLTR2</i>    | 1.652±0.297  | 0.578±0.711  | 1.02E-17 |
| cg03616357 | 4  | 156297942 | <i>MAP9</i>       | -3.314±0.394 | -4.272±0.619 | 1.03E-17 |
| cg13053608 | 17 | 40345673  | <i>GHDC</i>       | 0.068±0.205  | 0.941±0.586  | 1.06E-17 |
| cg17568996 | 22 | 42828125  | <i>NFAM1</i>      | -1.944±0.318 | -0.358±1.064 | 1.08E-17 |
| cg10562586 | 2  | 210444154 | <i>MAP2</i>       | -0.806±0.248 | 0.074±0.589  | 1.11E-17 |
| cg08274552 | 2  | 220491834 | <i>SLC4A3</i>     | -0.059±0.265 | 0.742±0.533  | 1.17E-17 |
| cg13791131 | 11 | 2161892   | <i>IGF2-AS</i>    | -2.754±0.569 | -1.244±0.992 | 1.18E-17 |
| cg23244913 | 6  | 29943401  | <i>HCG9</i>       | -2.432±0.966 | -0.113±1.498 | 1.21E-17 |
| cg18484189 | 11 | 7984973   | <i>NLRP10</i>     | 0.909±0.235  | -0.468±0.924 | 1.22E-17 |
| cg12457773 | 6  | 24126497  | <i>NRSN1</i>      | -2.278±0.349 | -1.071±0.81  | 1.22E-17 |
| cg24244000 | 15 | 27670335  | <i>GABRG3</i>     | 1.812±0.312  | 0.407±0.946  | 1.24E-17 |
| cg18546622 | 11 | 44325029  | <i>ALX4</i>       | -2.612±0.402 | -1.002±1.084 | 1.24E-17 |
| cg12317456 | 16 | 55512868  | <i>MMP2</i>       | -3.208±0.354 | -1.508±1.144 | 1.24E-17 |
| cg24075743 | 16 | 11375385  | <i>PRM1</i>       | 0.993±0.322  | 1.615±0.367  | 1.24E-17 |
| cg17711541 | 6  | 26124704  | <i>HIST1H2AC</i>  | -0.812±0.367 | -0.056±0.465 | 1.25E-17 |
| cg18794577 | 9  | 104501030 | <i>GRIN3A</i>     | -3.5±0.431   | -1.434±1.39  | 1.26E-17 |
| cg27071517 | 21 | 31768726  | <i>KRTAP13-1</i>  | 1.849±0.155  | 0.865±0.662  | 1.29E-17 |
| cg04348872 | 2  | 25141696  | <i>ADCY3</i>      | 2.84±0.222   | 3.358±0.333  | 1.30E-17 |
| cg03918304 | 2  | 176981654 | <i>HOXD10</i>     | -1.685±0.498 | -0.348±0.883 | 1.37E-17 |
| cg15984661 | 19 | 46916520  | <i>CCDC8</i>      | -3.78±0.317  | -1.772±1.353 | 1.47E-17 |
| cg02148834 | 21 | 10991354  | <i>TPTE</i>       | 2.117±0.371  | 2.926±0.511  | 1.47E-17 |
| cg17267907 | 8  | 6838024   | <i>DEFA1B</i>     | 1.188±0.234  | 0.306±0.595  | 1.48E-17 |
| cg26201213 | 10 | 131265796 | <i>MGMT</i>       | 0.078±0.217  | -0.66±0.497  | 1.50E-17 |
| cg02920216 | 21 | 19616939  | <i>CHODL</i>      | -2.092±0.274 | -1.043±0.709 | 1.52E-17 |
| cg06384463 | 1  | 91182708  | <i>BARHL2</i>     | -4.516±0.518 | -3.002±1.011 | 1.54E-17 |
| cg06995715 | 16 | 86612590  | <i>FOXL1</i>      | -2.591±0.622 | -0.829±1.174 | 1.59E-17 |
| cg04623837 | 6  | 29943414  | <i>HCG9</i>       | -3.352±1.06  | -0.847±1.623 | 1.60E-17 |
| cg00627233 | 2  | 79251911  | <i>REG3G</i>      | 0.849±0.196  | -0.387±0.824 | 1.60E-17 |
| cg16831889 | 15 | 50558051  | <i>HDC</i>        | -0.738±0.371 | 0.324±0.709  | 1.62E-17 |
| cg03032025 | 5  | 173316748 | <i>CPEB4</i>      | -0.605±0.365 | 0.348±0.629  | 1.64E-17 |
| cg00708598 | 13 | 53313895  | <i>LECT1</i>      | -2.178±0.266 | -1.007±0.794 | 1.74E-17 |
| cg11721194 | 1  | 160709239 | <i>SLAMF7</i>     | 0.509±0.191  | -0.266±0.525 | 1.75E-17 |
| cg22879289 | 1  | 236237743 | <i>0</i>          | 0.294±0.303  | -0.614±0.609 | 1.75E-17 |
| cg02955988 | 4  | 128885294 | <i>C4orf29</i>    | 0.509±0.24   | 0.07±0.253   | 1.76E-17 |
| cg14356550 | 1  | 18808102  | <i>KLHDC7A</i>    | 0.087±0.329  | -0.952±0.7   | 1.78E-17 |
| cg21359747 | 15 | 101420636 | <i>ALDH1A3</i>    | -3.758±0.526 | -1.599±1.463 | 1.78E-17 |
| cg18521771 | 9  | 117373239 | <i>C9orf91</i>    | 1.742±0.238  | 1.173±0.371  | 1.80E-17 |
| cg01348086 | 5  | 176785296 | <i>RGS14</i>      | 0.397±0.281  | -0.545±0.636 | 1.80E-17 |
| cg13804316 | 1  | 28286884  | <i>XKR8</i>       | -3.35±0.315  | -3.855±0.243 | 1.80E-17 |
| cg10878307 | 17 | 46034455  | <i>PRR15L</i>     | 0.617±0.235  | -0.31±0.629  | 1.84E-17 |
| cg06206626 | 22 | 26825900  | <i>ASPHD2</i>     | -0.495±0.111 | -0.081±0.281 | 1.86E-17 |
| cg13018903 | 11 | 124806901 | <i>HEPACAM</i>    | 2.334±0.224  | 0.938±0.946  | 1.88E-17 |
| cg25119415 | 1  | 158799935 | <i>MNDA</i>       | 1.453±0.324  | -0.259±1.162 | 1.88E-17 |
| cg03289872 | 19 | 56989102  | <i>ZNF667-AS1</i> | -3.866±0.523 | -1.845±1.371 | 1.90E-17 |
| cg10318258 | 14 | 24809759  | <i>RIPK3</i>      | 1.19±0.283   | 0±0.808      | 1.90E-17 |
| cg21949305 | 22 | 24828655  | <i>ADORA2A</i>    | -0.25±0.409  | 1.042±0.871  | 1.91E-17 |
| cg24857721 | 1  | 25599055  | <i>RHD</i>        | 1.008±0.269  | 1.612±0.388  | 1.93E-17 |
| cg04757243 | 3  | 133648823 | <i>C3orf36</i>    | 2.739±0.186  | 1.83±0.618   | 1.99E-17 |
| cg05436658 | 16 | 23847568  | <i>PRKCB</i>      | -4.551±0.393 | -1.812±1.856 | 2.00E-17 |
| cg17463527 | 20 | 42187837  | <i>SGK2</i>       | 1.561±0.215  | 0.476±0.738  | 2.00E-17 |

|            |    |           |                   |              |              |          |
|------------|----|-----------|-------------------|--------------|--------------|----------|
| cg10175795 | 10 | 133109194 | <i>TCERG1L</i>    | -2.524±0.253 | -1.126±0.949 | 2.01E-17 |
| cg27592112 | 15 | 27670095  | <i>GABRG3</i>     | 2.957±0.243  | 1.652±0.888  | 2.10E-17 |
| cg19248557 | 6  | 32407838  | <i>HLA-DRA</i>    | -2.054±0.308 | -2.878±0.549 | 2.11E-17 |
| cg04599297 | 10 | 26505442  | <i>GAD2</i>       | -2.748±0.289 | -1.365±0.941 | 2.12E-17 |
| cg03285457 | 10 | 102988529 | <i>LBX1</i>       | -4.175±0.481 | -2.495±1.141 | 2.16E-17 |
| cg19328294 | 16 | 2908554   | <i>PRSS22</i>     | -2.537±0.401 | -3.329±0.484 | 2.20E-17 |
| cg24142106 | 9  | 71319485  | <i>PIP5K1B</i>    | -1.582±0.339 | -2.381±0.522 | 2.31E-17 |
| cg21529533 | 6  | 29796015  | <i>HLA-G</i>      | -4.367±0.527 | -2.187±1.487 | 2.38E-17 |
| cg04062391 | 19 | 9609204   | <i>ZNF560</i>     | -3.182±0.382 | -1.52±1.134  | 2.40E-17 |
| cg15761233 | 2  | 200819070 | <i>C2orf47</i>    | 1.703±0.349  | 0.691±0.682  | 2.40E-17 |
| cg08742106 | 17 | 5031982   | <i>USP6</i>       | 2.785±0.258  | 1.81±0.665   | 2.45E-17 |
| cg16757724 | 20 | 43935528  | <i>RBPJL</i>      | 1.94±0.298   | 2.604±0.427  | 2.48E-17 |
| cg19224278 | 15 | 101419017 | <i>ALDH1A3</i>    | -1.685±0.334 | -0.656±0.697 | 2.51E-17 |
| cg24058132 | 14 | 88459866  | <i>GALC</i>       | -1.116±0.198 | -1.693±0.39  | 2.59E-17 |
| cg03019000 | 3  | 51704351  | <i>TEX264</i>     | 1.507±0.208  | 0.475±0.705  | 2.59E-17 |
| cg19325985 | 2  | 176956761 | <i>HOXD13</i>     | -2.289±0.235 | -1.116±0.801 | 2.59E-17 |
| cg06675478 | 13 | 112721786 | <i>SOX1</i>       | -1.336±0.508 | -0.362±0.589 | 2.60E-17 |
| cg05376954 | 19 | 52255673  | <i>FPR1</i>       | -0.352±0.353 | -1.201±0.542 | 2.60E-17 |
| cg13217373 | 6  | 167275395 | <i>RPS6KA2</i>    | -0.572±0.304 | 0.332±0.611  | 2.60E-17 |
| cg15485859 | 1  | 207206447 | <i>C1orf116</i>   | 0.826±0.242  | -0.31±0.777  | 2.65E-17 |
| cg00031162 | 17 | 7453377   | <i>TNFSF12</i>    | -0.649±0.345 | 0.1±0.48     | 2.72E-17 |
| cg16158220 | 2  | 79383891  | <i>0</i>          | 1.957±0.22   | 0.671±0.879  | 2.78E-17 |
| cg21820677 | 4  | 46392528  | <i>GABRA2</i>     | -4.736±0.457 | -2.924±1.24  | 2.80E-17 |
| cg18338293 | 11 | 66277283  | <i>BBS1</i>       | 1.882±0.236  | 2.369±0.307  | 2.80E-17 |
| cg00594952 | 1  | 41130641  | <i>RIMS3</i>      | 0.779±0.276  | 1.673±0.609  | 2.87E-17 |
| cg22333888 | 20 | 3663421   | <i>ADAM33</i>     | -0.814±0.287 | 0.132±0.644  | 2.88E-17 |
| cg27016494 | 7  | 96651586  | <i>DLX5</i>       | -1.268±0.218 | -0.149±0.766 | 2.90E-17 |
| cg23571857 | 17 | 6658898   | <i>XAF1</i>       | -0.1±0.28    | 0.713±0.55   | 2.91E-17 |
| cg20828084 | 15 | 81070851  | <i>KIAA1199</i>   | 2.356±0.197  | 1.278±0.738  | 2.92E-17 |
| cg15674997 | 5  | 178421314 | <i>GRM6</i>       | -0.826±0.352 | 0.02±0.558   | 2.92E-17 |
| cg08411049 | 18 | 61144250  | <i>SERPINB5</i>   | 2.101±0.444  | 0.694±0.958  | 3.03E-17 |
| cg03218909 | 1  | 156589008 | <i>HAPLN2</i>     | -1.852±0.254 | -2.399±0.351 | 3.05E-17 |
| cg09313705 | 17 | 46622491  | <i>HOXB2</i>      | -1.154±0.31  | -0.088±0.729 | 3.10E-17 |
| cg01772980 | 11 | 61957695  | <i>SCGB1D1</i>    | 1.42±0.27    | 0.417±0.687  | 3.12E-17 |
| cg22619018 | 8  | 4852624   | <i>CSMD1</i>      | -3.818±0.671 | -1.882±1.311 | 3.14E-17 |
| cg26203861 | 1  | 201858661 | <i>SHISA4</i>     | -0.214±0.122 | 0.56±0.53    | 3.15E-17 |
| cg20291049 | 2  | 105472217 | <i>POU3F3</i>     | -1.966±0.382 | -0.497±1.008 | 3.17E-17 |
| cg02367951 | 6  | 27806562  | <i>HIST1H2BN</i>  | -1.27±0.303  | -0.696±0.347 | 3.17E-17 |
| cg14011639 | 5  | 140797234 | <i>PCDHGB7</i>    | -3.938±0.342 | -2.304±1.122 | 3.30E-17 |
| cg16993794 | 22 | 24199328  | <i>SLC2A11</i>    | -3.475±0.386 | -4.346±0.568 | 3.34E-17 |
| cg20890210 | 8  | 73450181  | <i>KCNB2</i>      | -2.59±0.278  | -1.251±0.92  | 3.36E-17 |
| cg06015218 | 6  | 146350434 | <i>GRM1</i>       | -3.813±0.441 | -2.14±1.148  | 3.36E-17 |
| cg10634551 | 3  | 178254242 | <i>KCNMB2</i>     | -2.915±0.424 | -1.559±0.926 | 3.38E-17 |
| cg26825412 | 20 | 62681428  | <i>SOX18</i>      | -0.346±0.173 | 0.492±0.576  | 3.39E-17 |
| cg16682903 | 2  | 158694670 | <i>ACVR1</i>      | -1.196±0.302 | -0.147±0.711 | 3.42E-17 |
| cg05412531 | 8  | 125183758 | <i>FER1L6-AS2</i> | 2.078±0.394  | 2.935±0.553  | 3.42E-17 |
| cg22335340 | 12 | 7055153   | <i>PTPN6</i>      | 0.709±0.205  | -0.007±0.491 | 3.43E-17 |
| cg15377518 | 2  | 145278113 | <i>ZEB2</i>       | -2.507±0.396 | -1.276±0.84  | 3.47E-17 |
| cg21546671 | 17 | 46655387  | <i>HOXB4</i>      | -3.614±0.534 | -1.047±1.766 | 3.52E-17 |
| cg09868882 | 7  | 126883640 | <i>GRM8</i>       | 1.386±0.22   | 0.075±0.901  | 3.55E-17 |
| cg08614481 | 6  | 78173250  | <i>HTR1B</i>      | -3.355±0.321 | -2.064±0.889 | 3.64E-17 |
| cg18221897 | 19 | 55282146  | <i>KIR2DL1</i>    | 1.629±0.26   | 0.817±0.555  | 3.67E-17 |
| cg04609640 | 1  | 45254092  | <i>BEST4</i>      | 0.119±0.257  | 0.797±0.456  | 3.69E-17 |
| cg07022477 | 19 | 46798869  | <i>HIF3A</i>      | -0.208±0.342 | -1.039±0.552 | 3.71E-17 |
| cg24964368 | 19 | 52264413  | <i>FPR2</i>       | -1.116±0.265 | -0.201±0.628 | 3.78E-17 |
| cg17945001 | 1  | 18434118  | <i>IGSF21</i>     | -2.52±0.516  | -1.345±0.77  | 3.82E-17 |
| cg02168291 | 16 | 82671520  | <i>CDH13</i>      | 2.012±0.348  | 0.788±0.841  | 3.84E-17 |
| cg10705800 | 1  | 41328420  | <i>CITED4</i>     | -1.1±0.323   | -1.952±0.574 | 3.91E-17 |
| cg00792849 | 15 | 35046610  | <i>GJD2</i>       | -3.53±0.457  | -1.933±1.098 | 3.93E-17 |
| cg17839611 | 17 | 47286802  | <i>GNGT2</i>      | 0.954±0.261  | 0.105±0.583  | 3.99E-17 |
| cg19370284 | 7  | 99647006  | <i>ZSCAN21</i>    | 2.234±0.334  | 2.801±0.313  | 4.00E-17 |
| cg15560337 | 7  | 123484898 | <i>HYAL4</i>      | 1.54±0.342   | 0.252±0.888  | 4.05E-17 |
| cg09827833 | 9  | 27109492  | <i>TEK</i>        | -2.867±0.356 | -1.574±0.89  | 4.05E-17 |
| cg18997129 | 7  | 143105850 | <i>EPHA1</i>      | -0.588±0.282 | -1.329±0.499 | 4.13E-17 |
| cg06489008 | 20 | 23433349  | <i>CST11</i>      | 1.179±0.188  | 0.02±0.799   | 4.20E-17 |
| cg03087937 | 11 | 26593556  | <i>MUC15</i>      | 1.436±0.251  | 0.261±0.811  | 4.28E-17 |
| cg11260848 | 11 | 44326260  | <i>ALX4</i>       | -2.008±0.246 | -0.737±0.878 | 4.36E-17 |
| cg00022866 | 11 | 64108440  | <i>CCDC88B</i>    | 0.42±0.168   | 1.111±0.477  | 4.43E-17 |
| cg02681442 | 14 | 29236008  | <i>FOXG1</i>      | -3.121±0.423 | -1.308±1.254 | 4.45E-17 |
| cg16516400 | 1  | 231177201 | <i>FAM89A</i>     | -3.46±0.44   | -2.14±0.904  | 4.62E-17 |

|            |    |           |           |              |              |          |
|------------|----|-----------|-----------|--------------|--------------|----------|
| cg00392257 | 1  | 156696747 | ISG20L2   | 0.574±0.268  | -0.31±0.608  | 4.62E-17 |
| cg17589341 | 18 | 43304079  | SLC14A1   | 0.283±0.24   | -0.534±0.563 | 4.64E-17 |
| cg16620032 | 19 | 46097075  | GPR4      | -2.021±0.357 | -2.819±0.522 | 4.71E-17 |
| cg10481740 | 4  | 1857103   | LETM1     | -3.137±0.282 | -3.764±0.411 | 4.83E-17 |
| cg06235429 | 11 | 67373114  | NDUFV1    | 1.971±0.153  | 2.31±0.221   | 4.94E-17 |
| cg06274159 | 4  | 188916867 | ZFP42     | -1.956±0.582 | 0.165±1.467  | 4.99E-17 |
| cg12348970 | 9  | 19786543  | SLC24A2   | 3.139±0.315  | 1.469±1.157  | 5.03E-17 |
| cg01839464 | 18 | 49868477  | DCC       | -3.383±0.524 | -1.698±1.161 | 5.08E-17 |
| cg21572897 | 3  | 119277821 | CD80      | 1.629±0.25   | 0.545±0.752  | 5.09E-17 |
| cg19718882 | 11 | 32458714  | WT1-AS    | -3.013±0.44  | -1.474±1.064 | 5.10E-17 |
| cg10920765 | 11 | 5276721   | HBG2      | 1.273±0.289  | 0.1±0.805    | 5.40E-17 |
| cg13603171 | 6  | 132723164 | MOXD1     | -1.92±0.365  | -0.443±1.025 | 5.43E-17 |
| cg05441133 | 10 | 48416891  | GDF2      | 0.855±0.297  | 2.246±0.966  | 5.52E-17 |
| cg26789453 | 12 | 112452424 | ERP29     | 0.442±0.382  | -0.715±0.796 | 5.68E-17 |
| cg16842214 | 3  | 42727160  | KLHL40    | -0.386±0.327 | 0.489±0.595  | 5.68E-17 |
| cg03022541 | 3  | 128186859 | DNAJB8    | 1.293±0.197  | 0.458±0.58   | 5.78E-17 |
| cg16272420 | 10 | 118381044 | PNLIPRP2  | 0.8±0.225    | 0.004±0.552  | 6.10E-17 |
| cg04549333 | 11 | 44325823  | ALX4      | -3.17±0.424  | -1.538±1.135 | 6.18E-17 |
| cg01888566 | 7  | 130126513 | MEST      | -0.629±0.317 | -1.859±0.856 | 6.23E-17 |
| cg20802392 | 1  | 150780684 | CTSK      | 0.518±0.268  | 1.359±0.581  | 6.33E-17 |
| cg15983538 | 1  | 156123411 | SEMA4A    | 0.807±0.253  | -0.484±0.899 | 6.44E-17 |
| cg06319346 | 15 | 30686892  | CHRFAM7A  | 1.92±0.246   | 1.333±0.393  | 6.46E-17 |
| cg11061975 | 20 | 1639325   | SIRPG     | 2.14±0.268   | 0.743±0.974  | 6.80E-17 |
| cg12584718 | 7  | 100028402 | MEPCE     | -1.964±0.249 | -0.452±1.053 | 6.81E-17 |
| cg11300809 | 2  | 223288637 | SGPP2     | -0.493±0.177 | -1.131±0.443 | 6.82E-17 |
| cg04765277 | 10 | 8094679   | GATA3-AS1 | -1.44±0.349  | -0.509±0.636 | 6.83E-17 |
| cg03329165 | 3  | 112052218 | CD200     | -4.896±0.46  | -2.756±1.494 | 6.98E-17 |
| cg00806490 | 16 | 82660873  | CDH13     | -2.432±0.38  | -1.107±0.922 | 7.11E-17 |
| cg19105504 | 11 | 60524472  | MS4A15    | -0.478±0.397 | -1.523±0.713 | 7.13E-17 |
| cg24516901 | 2  | 225266801 | FAM124B   | -2.102±0.416 | -0.495±1.121 | 7.13E-17 |
| cg21542793 | 2  | 96781891  | ADRA2B    | -1.155±0.352 | -0.127±0.709 | 7.13E-17 |
| cg07660236 | 6  | 28367883  | ZSCAN12   | -3.092±0.342 | -1.607±1.037 | 7.16E-17 |
| cg21272774 | 12 | 54393725  | HOXC9     | -3.545±0.352 | -1.827±1.2   | 7.18E-17 |
| cg25355803 | 10 | 99473032  | MARVELD1  | 0.282±0.133  | 0.669±0.267  | 7.22E-17 |
| cg13258700 | 7  | 156433997 | RNF32     | -2.489±0.359 | -3.354±0.582 | 7.34E-17 |
| cg18692273 | 1  | 201347483 | TNNT2     | 3.567±0.359  | 2.47±0.76    | 7.44E-17 |
| cg10667970 | 1  | 11724057  | FBXO6     | -2.102±0.258 | -2.812±0.487 | 7.45E-17 |
| cg14221171 | 7  | 97361759  | TAC1      | -2.516±0.349 | -1.224±0.902 | 7.47E-17 |
| cg09937039 | 14 | 75989203  | BATF      | -1.353±0.396 | -2.307±0.643 | 7.47E-17 |
| cg14062083 | 21 | 31802829  | KRTAP13-4 | 1.766±0.326  | 0.452±0.918  | 7.51E-17 |
| cg22918700 | 14 | 24600067  | FITM1     | 1.248±0.334  | 1.957±0.462  | 7.55E-17 |
| cg15992730 | 12 | 7848093   | GDF3      | -1.736±0.47  | -0.403±0.918 | 7.55E-17 |
| cg15679098 | 11 | 47470674  | RAPSN     | 2.55±0.288   | 3.222±0.45   | 7.64E-17 |
| cg11928198 | 1  | 151137319 | LYSMD1    | -0.601±0.325 | 0.177±0.523  | 7.83E-17 |
| cg00055233 | 9  | 5339677   | RLN1      | -0.058±0.159 | -0.772±0.5   | 7.84E-17 |
| cg17983307 | 1  | 201181402 | IGFN1     | 1.971±0.269  | 1.005±0.674  | 7.84E-17 |
| cg21176048 | 3  | 179755235 | PEX5L     | -4.775±0.481 | -2.919±1.298 | 7.91E-17 |
| cg03382304 | 21 | 27012176  | JAM2      | -4.231±0.319 | -2.09±1.496  | 7.96E-17 |
| cg26391080 | 10 | 82297397  | SH2D4B    | 1.185±0.338  | 1.902±0.468  | 7.98E-17 |
| cg13696012 | 20 | 31595360  | BPIFB2    | 3.063±0.253  | 1.327±1.213  | 8.11E-17 |
| cg16872071 | 9  | 135997155 | RALGDS    | 0.055±0.211  | -0.82±0.613  | 8.24E-17 |
| cg15873301 | 3  | 12045459  | SYN2      | -3.842±0.754 | -1.678±1.495 | 8.26E-17 |
| cg26282384 | 5  | 140767200 | PCDHGB4   | -3.641±0.437 | -2.169±1.027 | 8.43E-17 |
| cg01446393 | 3  | 58563609  | FAM107A   | -0.079±0.337 | 0.73±0.547   | 8.47E-17 |
| cg07837085 | 1  | 160708990 | SLAMF7    | -0.282±0.348 | -1.494±0.848 | 8.73E-17 |
| cg14156381 | 19 | 8212675   | FBN3      | -0.561±0.18  | -1.062±0.346 | 8.87E-17 |
| cg11462533 | 1  | 40156840  | HPCAL4    | -2.117±0.292 | -2.803±0.461 | 8.90E-17 |
| cg26608332 | 22 | 20861476  | MED15     | 0.835±0.302  | 1.683±0.586  | 8.97E-17 |
| cg25533774 | 7  | 16505409  | SOSTDC1   | -2.219±0.334 | -0.864±0.951 | 9.04E-17 |
| cg05163071 | 3  | 108476540 | RETNLB    | 0.371±0.319  | -0.31±0.447  | 9.15E-17 |
| cg06710648 | 1  | 58716377  | DAB1      | -1.482±0.381 | -0.206±0.892 | 9.15E-17 |
| cg20674577 | 20 | 58179540  | PHACTR3   | -2.052±0.3   | -1.004±0.733 | 9.38E-17 |
| cg02255732 | 11 | 31150189  | 0         | 0.705±0.301  | -0.355±0.734 | 9.41E-17 |
| cg08958015 | 12 | 49297901  | CCDC65    | -4.184±0.55  | -1.995±1.537 | 9.42E-17 |
| cg17266238 | 21 | 29385056  | LINC00314 | 2.167±0.371  | 1.353±0.539  | 9.46E-17 |
| cg14700707 | 6  | 32191840  | NOTCH4    | -1.251±0.304 | -0.132±0.786 | 9.88E-17 |
| cg12441928 | 3  | 46249985  | CCR1      | -2.947±0.449 | -4.006±0.716 | 1.02E-16 |
| cg00333226 | 7  | 49813763  | VWC2      | -2.579±0.388 | -1.087±1.049 | 1.03E-16 |
| cg18822544 | 21 | 31692465  | KRTAP26-1 | 0.758±0.252  | -0.461±0.849 | 1.03E-16 |
| cg03679581 | 9  | 5304511   | RLN2      | -0.07±0.176  | -0.764±0.488 | 1.06E-16 |

|            |    |           |           |              |              |          |
|------------|----|-----------|-----------|--------------|--------------|----------|
| cg00629217 | 4  | 54425349  | LNK1      | 1.159±0.249  | 1.889±0.508  | 1.07E-16 |
| cg00848728 | 1  | 58716018  | DAB1      | -4.934±0.648 | -2.737±1.542 | 1.08E-16 |
| cg00145118 | 5  | 141393931 | GNPDA1    | -0.804±0.258 | -0.136±0.459 | 1.09E-16 |
| cg22190114 | 19 | 56459234  | NLRP8     | 3.041±0.371  | 1.548±1.053  | 1.12E-16 |
| cg16191009 | 3  | 9745369   | CPNE9     | 0.416±0.264  | 1.357±0.661  | 1.13E-16 |
| cg09828634 | 21 | 31859610  | KRTAP19-2 | 2.74±0.375   | 1.352±0.978  | 1.14E-16 |
| cg01546430 | 5  | 156607836 | ITK       | -0.831±0.312 | -1.867±0.727 | 1.14E-16 |
| cg18592174 | 10 | 50817306  | CHAT      | -3.512±0.413 | -2.195±0.923 | 1.15E-16 |
| cg03889226 | 6  | 137815333 | OLIG3     | -3.754±0.419 | -2.186±1.105 | 1.15E-16 |
| cg19862344 | 6  | 49605181  | RHAG      | 0.165±0.277  | 1.157±0.699  | 1.17E-16 |
| cg27429194 | 17 | 3099847   | OR1A2     | 0.417±0.253  | -0.218±0.435 | 1.17E-16 |
| cg16098981 | 20 | 24449865  | SYNDIG1   | -3.844±0.485 | -2.06±1.257  | 1.17E-16 |
| cg06148175 | 11 | 67418148  | ACY3      | -1.273±0.235 | -1.965±0.483 | 1.18E-16 |
| cg03630088 | 10 | 125651526 | CPXM2     | -1.976±0.238 | -0.726±0.883 | 1.19E-16 |
| cg09873258 | 14 | 101192894 | DLK1      | -0.9±0.477   | 0.759±1.167  | 1.20E-16 |
| cg07705908 | 6  | 34523925  | SPDEF     | 0.468±0.226  | -0.622±0.771 | 1.22E-16 |
| cg21096399 | 11 | 119188145 | MCAM      | -1.849±0.478 | -0.526±0.919 | 1.22E-16 |
| cg27167601 | 15 | 61521923  | RORA      | -3.773±0.44  | -2.129±1.16  | 1.23E-16 |
| cg17376813 | 19 | 750024    | MISP      | 1.505±0.253  | 2.077±0.385  | 1.25E-16 |
| cg23400451 | 17 | 10373728  | MYH4      | 1.198±0.211  | -0.006±0.851 | 1.25E-16 |
| cg09829176 | 22 | 46545347  | PPARA     | -3.137±0.346 | -3.835±0.453 | 1.26E-16 |
| cg24921089 | 11 | 10472840  | AMPD3     | -0.672±0.183 | -1.3±0.443   | 1.27E-16 |
| cg00363813 | 12 | 6664872   | IFFO1     | -0.212±0.29  | 0.503±0.49   | 1.28E-16 |
| cg03364781 | 4  | 113298593 | ALPK1     | 1.392±0.246  | 2.132±0.518  | 1.32E-16 |
| cg25218351 | 2  | 27505446  | TRIM54    | 0.015±0.174  | 0.691±0.478  | 1.32E-16 |
| cg15700197 | 1  | 159409207 | OR10J1    | 0.465±0.3    | -0.879±0.951 | 1.32E-16 |
| cg22411207 | 8  | 57026301  | MOS       | -3.465±0.308 | -2.026±1.019 | 1.32E-16 |
| cg21279601 | 4  | 9782931   | DRD5      | -1.171±0.31  | 0.014±0.838  | 1.32E-16 |
| cg08539991 | 19 | 36203832  | ZBTB32    | 1.936±0.481  | 0.739±0.822  | 1.33E-16 |
| cg05127924 | 17 | 18647524  | FBXW10    | 0.204±0.23   | 1.013±0.572  | 1.38E-16 |
| cg13903548 | 6  | 90024543  | GABRR2    | 1.669±0.219  | 2.149±0.321  | 1.40E-16 |
| cg12448933 | 17 | 72667378  | RAB37     | -2.369±0.512 | -0.88±1.042  | 1.40E-16 |
| cg25763788 | 6  | 78172950  | HTR1B     | -2.724±0.32  | -1.385±0.949 | 1.41E-16 |
| cg19404582 | 9  | 140032953 | GRIN1     | -1.433±0.258 | -0.54±0.631  | 1.43E-16 |
| cg04005707 | 4  | 48988321  | CWH43     | -3.204±0.565 | -1.428±1.251 | 1.47E-16 |
| cg02989257 | 1  | 32169274  | COL16A1   | 1.001±0.217  | 1.663±0.466  | 1.49E-16 |
| cg17274064 | 21 | 40033892  | ERG       | -1.662±0.308 | -2.697±0.731 | 1.50E-16 |
| cg20973210 | 19 | 2282729   | C19orf35  | -1.813±0.407 | -0.368±1.023 | 1.52E-16 |
| cg26521448 | 16 | 11876426  | ZC3H7A    | 3.663±0.424  | 2.639±0.701  | 1.52E-16 |
| cg16473288 | 9  | 125290120 | OR1N1     | 2.09±0.247   | 1.006±0.761  | 1.53E-16 |
| cg04086012 | 4  | 189060900 | TRIML1    | 1.856±0.294  | 0.81±0.741   | 1.53E-16 |
| cg19404979 | 19 | 48498031  | ELSPBP1   | 0.064±0.267  | -0.73±0.557  | 1.53E-16 |
| cg23054883 | 12 | 130647580 | FZD10     | -3.332±0.55  | -1.5±1.295   | 1.54E-16 |
| cg11647681 | 5  | 140810161 | PCDHGA12  | -1.35±0.316  | -0.176±0.832 | 1.59E-16 |
| cg14914852 | 17 | 38024797  | ZBP2      | 1.41±0.321   | 1.984±0.35   | 1.59E-16 |
| cg14736911 | 4  | 120057818 | MYOZ2     | 0.025±0.316  | 0.774±0.507  | 1.61E-16 |
| cg22631938 | 3  | 71802420  | GPR27     | -1.52±0.3    | -0.414±0.785 | 1.61E-16 |
| cg09516965 | 14 | 52734529  | PTGDR     | -3.899±0.759 | -1.336±1.815 | 1.65E-16 |
| cg16639595 | 7  | 87856984  | SRI       | 0.939±0.31   | -0.173±0.789 | 1.68E-16 |
| cg11412582 | 15 | 28567519  | HERC2     | -0.919±0.381 | -0.277±0.372 | 1.71E-16 |
| cg17412258 | 14 | 101193017 | DLK1      | -4.345±0.563 | -2.454±1.34  | 1.72E-16 |
| cg15949277 | 1  | 37939724  | LOC728431 | 0.342±0.377  | -4.12±0.416  | 1.74E-16 |
| cg12619162 | 10 | 43867155  | FXRD4     | -0.948±0.224 | 0.109±0.59   | 1.79E-16 |
| cg21045388 | 1  | 15428172  | KAZN      | 3.48±0.258   | 2.737±0.522  | 1.83E-16 |
| cg13446622 | 12 | 57328406  | SDR9C7    | 1.893±0.198  | 1.172±0.513  | 1.86E-16 |
| cg20080624 | 7  | 96651111  | DLX5      | -1.149±0.284 | 0.048±0.853  | 1.87E-16 |
| cg05472874 | 22 | 44258179  | SULT4A1   | -3.676±0.761 | -1.78±1.312  | 1.90E-16 |
| cg25890048 | 11 | 55703443  | OR5I1     | 2.041±0.241  | 0.781±0.9    | 1.96E-16 |
| cg07175883 | 2  | 176957908 | HOXD13    | -4.948±0.653 | -2.809±1.519 | 1.98E-16 |
| cg01401376 | 6  | 133563342 | EYA4      | -4.872±0.414 | -2.83±1.459  | 1.99E-16 |
| cg11323198 | 16 | 62069806  | CDH8      | -2.702±0.589 | -1.113±1.113 | 2.01E-16 |
| cg16330965 | 15 | 66790390  | SNAPC5    | -0.003±0.309 | -0.818±0.569 | 2.01E-16 |
| cg24262376 | 1  | 151137274 | LYSMD1    | 0.747±0.265  | 1.602±0.607  | 2.03E-16 |
| cg15811427 | 19 | 52254222  | FPR1      | 0.307±0.284  | -0.597±0.626 | 2.05E-16 |
| cg12061236 | 6  | 151560886 | AKAP12    | -1.281±0.299 | -0.107±0.839 | 2.07E-16 |
| cg24471894 | 9  | 2838508   | KIAA0020  | -2.871±0.427 | -1.636±0.871 | 2.09E-16 |
| cg07745725 | 19 | 43245860  | PSG3      | 0.973±0.268  | 0.201±0.545  | 2.12E-16 |
| cg11456838 | 6  | 159278754 | OSTCP1    | 0.554±0.275  | -0.381±0.666 | 2.15E-16 |
| cg25549459 | 2  | 105471252 | POU3F3    | -3.503±0.415 | -1.844±1.186 | 2.15E-16 |
| cg11670211 | 11 | 89224288  | NOX4      | -4.037±0.522 | -1.871±1.55  | 2.19E-16 |

|            |    |           |                   |              |              |          |
|------------|----|-----------|-------------------|--------------|--------------|----------|
| cg00551244 | 8  | 125183776 | <i>FER1L6-AS2</i> | 2.039±0.301  | 2.808±0.536  | 2.20E-16 |
| cg03264414 | 9  | 138453697 | <i>PAEP</i>       | 2.133±0.382  | 1.142±0.692  | 2.21E-16 |
| cg25971347 | 16 | 86544339  | <i>FOXF1</i>      | -5.442±0.679 | -3.041±1.714 | 2.23E-16 |
| cg08785215 | 3  | 57993979  | <i>FLNB</i>       | -4.009±0.412 | -4.75±0.459  | 2.24E-16 |
| cg26771272 | 17 | 18163183  | <i>SMCR7</i>      | 1.84±0.268   | 0.793±0.749  | 2.25E-16 |
| cg00718513 | 2  | 89215272  | <i>0</i>          | -0.087±0.86  | -1.52±0.831  | 2.28E-16 |
| cg16521028 | 12 | 75874414  | <i>GLIPR1</i>     | -0.943±0.414 | -2.316±0.979 | 2.32E-16 |
| cg18335068 | 19 | 53757910  | <i>ZNF677</i>     | -4.258±0.527 | -2.277±1.418 | 2.34E-16 |
| cg13943564 | 18 | 61555117  | <i>SERPINB2</i>   | 1.386±0.21   | 0.393±0.712  | 2.41E-16 |
| cg25725843 | 2  | 107504169 | <i>ST6GAL2</i>    | -2.361±0.321 | -1.387±0.692 | 2.42E-16 |
| cg06940107 | 21 | 29911783  | <i>LINC00161</i>  | 0.805±0.268  | -0.282±0.779 | 2.43E-16 |
| cg08495878 | 14 | 95027859  | <i>SERPINA4</i>   | 1.41±0.288   | 0.232±0.845  | 2.52E-16 |
| cg11084611 | 2  | 132480958 | <i>C2orf27A</i>   | 2.961±0.255  | 1.835±0.808  | 2.54E-16 |
| cg13929328 | 10 | 129535898 | <i>FOXI2</i>      | -2.148±0.48  | -0.845±0.919 | 2.56E-16 |
| cg03931808 | 19 | 14139099  | <i>RLN3</i>       | 2.843±0.317  | 3.505±0.443  | 2.59E-16 |
| cg17527798 | 3  | 46506404  | <i>LTF</i>        | -0.302±0.2   | -1.232±0.668 | 2.60E-16 |
| cg01369413 | 11 | 5530544   | <i>UBQLN3</i>     | 1.929±0.277  | 1.038±0.637  | 2.72E-16 |
| cg01753375 | 2  | 74607600  | <i>DCTN1</i>      | -0.531±0.227 | 0.236±0.55   | 2.74E-16 |
| cg04263186 | 4  | 104640489 | <i>TACR3</i>      | -2.35±0.47   | -0.958±0.99  | 2.74E-16 |
| cg20616414 | 9  | 95947396  | <i>WNK2</i>       | -2.361±0.888 | -0.35±1.379  | 2.75E-16 |
| cg21347412 | 19 | 4339217   | <i>STAP2</i>      | 2.017±0.304  | 1.09±0.661   | 2.77E-16 |
| cg08812936 | 3  | 178254213 | <i>KCNMB2</i>     | -1.238±0.295 | -0.133±0.794 | 2.81E-16 |
| cg17923358 | 7  | 103629618 | <i>RELN</i>       | -3.256±0.493 | -1.623±1.17  | 2.87E-16 |
| cg02037013 | 18 | 58039530  | <i>MC4R</i>       | 0.481±0.329  | 1.294±0.568  | 2.95E-16 |
| cg19096475 | 11 | 123066529 | <i>CLMP</i>       | -0.076±0.223 | 0.745±0.591  | 3.01E-16 |
| cg15518950 | 5  | 72415770  | <i>TMEM171</i>    | -1.698±0.376 | -0.076±1.169 | 3.01E-16 |
| cg20832020 | 3  | 114012912 | <i>TIGIT</i>      | 1.297±0.219  | 0.219±0.778  | 3.05E-16 |
| cg18752880 | 5  | 34043509  | <i>C1QTNF3</i>    | -1.932±0.439 | -0.581±0.966 | 3.10E-16 |
| cg24063382 | 6  | 29457061  | <i>MAS1L</i>      | 1.762±0.261  | 1.074±0.485  | 3.14E-16 |
| cg01031251 | 1  | 26855423  | <i>RPS6KA1</i>    | -0.226±0.239 | 0.641±0.624  | 3.21E-16 |
| cg17974185 | 20 | 36323340  | <i>CTNBNB1</i>    | 0.957±0.477  | 2.214±0.888  | 3.22E-16 |
| cg24777710 | 7  | 127636733 | <i>SND1-IT1</i>   | 2.066±0.23   | 2.698±0.449  | 3.40E-16 |
| cg05661838 | 8  | 57026568  | <i>MOS</i>        | -3.472±0.366 | -1.838±1.181 | 3.40E-16 |
| cg22289837 | 8  | 86350278  | <i>CA3</i>        | -1.341±0.226 | -0.23±0.804  | 3.55E-16 |
| cg11368643 | 5  | 140625059 | <i>PCDHB15</i>    | -1.959±0.337 | -0.531±1.033 | 3.55E-16 |
| cg03221914 | 6  | 27783331  | <i>HIST1H2AJ</i>  | -0.3±0.214   | 0.679±0.709  | 3.63E-16 |
| cg27465569 | 12 | 44153853  | <i>IRAK4</i>      | 1.522±0.271  | 0.432±0.788  | 3.70E-16 |
| cg25266232 | 18 | 49867126  | <i>DCC</i>        | -3.143±0.355 | -1.849±0.935 | 3.74E-16 |
| cg20191453 | 3  | 49459855  | <i>AMT</i>        | 0.306±0.306  | 1.443±0.822  | 3.84E-16 |
| cg26147480 | 10 | 126490099 | <i>FAM175B</i>    | 2.557±0.26   | 1.454±0.8    | 3.88E-16 |
| cg18750960 | 2  | 177016417 | <i>HOXD4</i>      | -2.916±0.467 | -1.073±1.335 | 3.93E-16 |
| cg06580318 | 2  | 169747119 | <i>SPC25</i>      | -3.392±0.454 | -4.137±0.434 | 3.94E-16 |
| cg16855929 | 1  | 231561414 | <i>EGLN1</i>      | 0.187±0.351  | 0.972±0.542  | 4.06E-16 |
| cg10832945 | 2  | 240499879 | <i>0</i>          | 0.878±0.3    | -0.282±0.841 | 4.08E-16 |
| cg15407570 | 3  | 52529524  | <i>STAB1</i>      | -0.31±0.198  | 0.373±0.494  | 4.08E-16 |
| cg04745805 | 17 | 40427474  | <i>STAT5B</i>     | -3.802±0.33  | -2.361±1.046 | 4.12E-16 |
| cg02656594 | 16 | 27412496  | <i>IL21R</i>      | 0.325±0.334  | -1.052±0.999 | 4.12E-16 |
| cg14116122 | 12 | 85673884  | <i>ALX1</i>       | -4.733±0.532 | -2.948±1.29  | 4.16E-16 |
| cg20530056 | 1  | 206643377 | <i>IKBKE</i>      | 0.255±0.277  | -0.688±0.682 | 4.19E-16 |
| cg24520070 | 14 | 94462337  | <i>LINC00521</i>  | 0.671±0.265  | 1.589±0.664  | 4.25E-16 |
| cg05060662 | 12 | 14923882  | <i>HIST4H4</i>    | -4.888±0.468 | -3.235±1.198 | 4.44E-16 |
| cg12508624 | 11 | 119293780 | <i>THY1</i>       | -4.15±0.481  | -2.466±1.221 | 4.65E-16 |
| cg06692050 | 10 | 99532398  | <i>SFRP5</i>      | 2.326±0.487  | 3.247±0.602  | 4.72E-16 |
| cg13269964 | 17 | 41924577  | <i>CD300LG</i>    | 1.425±0.323  | 2.18±0.527   | 4.74E-16 |
| cg19435264 | 5  | 149569537 | <i>SLC6A7</i>     | -3.775±0.466 | -2.335±1.04  | 4.93E-16 |
| cg20713492 | 1  | 154293482 | <i>AQP10</i>      | -1.555±0.367 | -0.346±0.876 | 4.94E-16 |
| cg04155793 | 16 | 89752847  | <i>CDK10</i>      | -0.264±0.392 | -1.114±0.585 | 4.98E-16 |
| cg08097973 | 11 | 71793051  | <i>NUMA1</i>      | 1.303±0.275  | 0.221±0.787  | 4.98E-16 |
| cg13255190 | 12 | 4829286   | <i>GALNT8</i>     | 0.656±0.204  | 0.043±0.442  | 5.11E-16 |
| cg11310496 | 10 | 118380175 | <i>PNLIPRP2</i>   | 2.425±0.457  | 3.176±0.442  | 5.12E-16 |
| cg03914397 | 5  | 151784441 | <i>NMUR2</i>      | 1.404±0.231  | 0.258±0.836  | 5.22E-16 |
| cg20676475 | 1  | 152552494 | <i>LCE3D</i>      | 1.512±0.255  | 0.076±1.047  | 5.23E-16 |
| cg08260959 | 6  | 26240920  | <i>HIST1H4F</i>   | -3.726±0.368 | -1.579±1.566 | 5.28E-16 |
| cg10398682 | 15 | 83952019  | <i>BNC1</i>       | -1.836±0.277 | -0.559±0.932 | 5.32E-16 |
| cg10523494 | 17 | 72528386  | <i>CD300LB</i>    | -0.268±0.317 | -1.18±0.657  | 5.34E-16 |
| cg12128017 | 1  | 38230769  | <i>EPHA10</i>     | -3.651±0.495 | -1.948±1.237 | 5.34E-16 |
| cg23581186 | 21 | 32119309  | <i>KRTAP21-2</i>  | 0.823±0.335  | -0.083±0.649 | 5.45E-16 |
| cg27059238 | 6  | 26273326  | <i>HIST1H2BI</i>  | -1.496±0.34  | -0.913±0.359 | 5.45E-16 |
| cg21591452 | 17 | 79304628  | <i>TMEM105</i>    | 2.56±0.389   | 1.162±1.018  | 5.52E-16 |
| cg22396755 | 1  | 21995097  | <i>RAP1GAP</i>    | -3.558±0.524 | -1.689±1.362 | 5.74E-16 |

|            |    |           |               |              |              |          |
|------------|----|-----------|---------------|--------------|--------------|----------|
| cg25363445 | 11 | 44326516  | ALX4          | -2.344±0.258 | -1.109±0.904 | 6.07E-16 |
| cg12266049 | 11 | 69461334  | CCND1         | 3.081±0.71   | 4.17±0.585   | 6.12E-16 |
| cg04564030 | 18 | 63417392  | CDH7          | -3.454±0.389 | -1.89±1.144  | 6.14E-16 |
| cg24812103 | 8  | 101735630 | PABPC1        | -0.414±0.244 | -1.417±0.725 | 6.16E-16 |
| cg21238818 | 11 | 65816642  | GAL3ST3       | -2.425±0.615 | -1.149±0.872 | 6.28E-16 |
| cg22477971 | 1  | 22984594  | C1QB          | 1.555±0.277  | 0.464±0.798  | 6.29E-16 |
| cg15238200 | 17 | 73893634  | TRIM65        | 1±0.23       | 1.589±0.421  | 6.33E-16 |
| cg02836529 | 2  | 182544413 | NEUROD1       | -3.452±0.383 | -2.223±0.894 | 6.34E-16 |
| cg02630888 | 4  | 15657820  | FBXL5         | 1.391±0.276  | 0.422±0.708  | 6.39E-16 |
| cg21053529 | 15 | 35046760  | GJD2          | -2.184±0.372 | -0.958±0.893 | 6.43E-16 |
| cg25875213 | 19 | 38183055  | ZNF781        | -5.096±0.723 | -2.173±2.141 | 6.45E-16 |
| cg19450025 | 16 | 30206073  | SLX1B-SULT1A4 | -3.233±0.581 | -1.608±1.173 | 6.65E-16 |
| cg09988116 | 1  | 43750693  | C1orf210      | 1.322±0.319  | 0.261±0.774  | 6.71E-16 |
| cg08440425 | 11 | 71790735  | LRTOMT        | -2.662±0.4   | -3.498±0.574 | 6.72E-16 |
| cg22772878 | 19 | 2721800   | DIRAS1        | -1.53±0.233  | -0.714±0.596 | 6.72E-16 |
| cg05700681 | 16 | 57392764  | CCL22         | 2.516±0.32   | 1.55±0.702   | 6.77E-16 |
| cg02833180 | 2  | 198815064 | PLCL1         | 2.204±0.409  | 0.912±0.94   | 6.77E-16 |
| cg16215361 | 11 | 26594620  | MUC15         | 1.358±0.277  | 0.219±0.836  | 6.92E-16 |
| cg05131835 | 17 | 61959145  | GH2           | 1.833±0.195  | 1.212±0.452  | 7.09E-16 |
| cg22670329 | 4  | 74702075  | CXCL6         | -1.255±0.281 | -0.281±0.713 | 7.11E-16 |
| cg20312687 | 20 | 29956585  | DEFB118       | 1.214±0.298  | -0.134±0.991 | 7.11E-16 |
| cg23092086 | 16 | 55909573  | CES5A         | 2.062±0.224  | 1.081±0.721  | 7.16E-16 |
| cg21448423 | 1  | 55013956  | ACOT11        | -0.665±0.222 | 0.127±0.58   | 7.17E-16 |
| cg16742703 | 19 | 51357857  | KLK3          | 0.299±0.383  | -0.465±0.504 | 7.23E-16 |
| cg24304714 | 1  | 152779374 | LCE1C         | -0.984±0.253 | -1.652±0.481 | 7.26E-16 |
| cg03848675 | 6  | 1389146   | FOXF2         | -4.22±0.452  | -2.702±1.111 | 7.31E-16 |
| cg04457979 | 11 | 2890647   | KCNQ1DN       | -1.001±0.445 | 0.149±0.825  | 7.31E-16 |
| cg07447922 | 1  | 38230827  | EPHA10        | -3.714±0.396 | -1.859±1.364 | 7.32E-16 |
| cg13398291 | 8  | 41166169  | SFRP1         | -3.365±0.538 | -1.484±1.378 | 7.38E-16 |
| cg19345602 | 11 | 125615388 | PATE1         | 0.158±0.29   | -0.925±0.794 | 7.40E-16 |
| cg06638433 | 17 | 47075175  | IGFBP1        | -2.472±0.248 | -0.83±1.207  | 7.41E-16 |
| cg12315311 | 19 | 54568443  | VSTM1         | -1.302±0.296 | -2.092±0.569 | 7.46E-16 |
| cg08747377 | 16 | 82660670  | CDH13         | -4.299±0.52  | -2.564±1.27  | 7.46E-16 |
| cg21094154 | 13 | 43146121  | TNFSF11       | 2.113±0.319  | 1.061±0.77   | 7.47E-16 |
| cg27223047 | 5  | 127874825 | FBN2          | -1.855±0.291 | -0.611±0.915 | 7.58E-16 |
| cg11220060 | 19 | 12997418  | KLF1          | -0.712±0.291 | 0.033±0.534  | 7.60E-16 |
| cg17738194 | 4  | 80329388  | GK2           | 0.684±0.26   | -0.36±0.768  | 7.77E-16 |
| cg06324671 | 21 | 31933511  | KRTAP19-7     | 3.537±0.281  | 2.172±1.005  | 7.77E-16 |
| cg04868764 | 15 | 41137019  | SPINT1        | -3.425±0.35  | -4.02±0.368  | 7.96E-16 |
| cg04001668 | 16 | 57654347  | GPR56         | 1.82±0.297   | 0.78±0.763   | 8.03E-16 |
| cg23909343 | 1  | 212457915 | PPP2R5A       | -2.918±0.31  | -3.483±0.368 | 8.03E-16 |
| cg01806928 | 11 | 7272804   | SYT9          | -1.767±0.301 | -0.736±0.756 | 8.05E-16 |
| cg16501235 | 1  | 150245988 | C1orf54       | 0.198±0.148  | 0.848±0.479  | 8.07E-16 |
| cg13912117 | 8  | 132054555 | 0             | -3.537±0.716 | -1.619±1.386 | 8.14E-16 |
| cg16008138 | 17 | 60885892  | 42439         | 0.433±0.191  | -0.193±0.458 | 8.22E-16 |
| cg04072323 | 2  | 229046325 | SPHKAP        | -3.923±0.451 | -2.354±1.153 | 8.28E-16 |
| cg25943276 | 11 | 131533284 | NTM           | 2.569±0.269  | 1.083±1.096  | 8.31E-16 |
| cg09837943 | 19 | 57306631  | ZIM2          | 1.166±0.335  | 0.22±0.687   | 8.49E-16 |
| cg09147827 | 14 | 94789853  | SERPINA6      | 0.279±0.291  | -0.637±0.67  | 8.59E-16 |
| cg23776012 | 17 | 38821403  | KRT222        | -0.963±0.366 | 0.148±0.812  | 8.71E-16 |
| cg03775246 | 5  | 111095049 | NREP          | 0.713±0.353  | 1.311±0.365  | 9.15E-16 |
| cg06059810 | 4  | 71587722  | RUFY3         | 1.326±0.255  | 1.862±0.367  | 9.37E-16 |
| cg19996355 | 19 | 19729375  | PBX4          | -2.72±0.472  | -3.867±0.821 | 9.38E-16 |
| cg00679556 | 6  | 30080782  | TRIM31        | 0.935±0.204  | 0.017±0.679  | 9.61E-16 |
| cg08935003 | 11 | 60101561  | MS4A6E        | -0.885±0.358 | -1.621±0.506 | 9.64E-16 |
| cg05382123 | 1  | 34632585  | C1orf94       | -3.798±0.464 | -2.027±1.308 | 9.64E-16 |
| cg11750883 | 1  | 152486950 | CRCT1         | 0.611±0.241  | -0.465±0.796 | 9.71E-16 |
| cg23018448 | 19 | 10811855  | QTRT1         | -0.757±0.249 | -1.445±0.5   | 9.90E-16 |
| cg25657700 | 15 | 25123491  | SNRPN         | 0.814±0.523  | 1.904±0.755  | 1.00E-15 |
| cg14753432 | 11 | 44324833  | ALX4          | -0.328±0.209 | 0.343±0.493  | 1.00E-15 |
| cg17834752 | 8  | 140715239 | KCNK9         | -4.542±0.564 | -2.454±1.543 | 1.02E-15 |
| cg24642468 | 16 | 49407997  | C16orf78      | 0.688±0.317  | -0.291±0.718 | 1.02E-15 |
| cg13139843 | 21 | 31852793  | KRTAP19-1     | 0.577±0.24   | -0.576±0.854 | 1.02E-15 |
| cg01668383 | 13 | 37679573  | CSNK1A1L      | 1.175±0.24   | 0.416±0.558  | 1.03E-15 |
| cg20099806 | 17 | 61849988  | CCDC47        | -0.872±0.261 | -1.538±0.481 | 1.04E-15 |
| cg07873488 | 7  | 100662570 | MUC17         | 2.401±0.283  | 1.407±0.734  | 1.05E-15 |
| cg15918284 | 4  | 46392657  | GABRA2        | -3.348±0.403 | -2.109±0.91  | 1.06E-15 |
| cg12640109 | 11 | 62104720  | ASRGL1        | -0.773±0.277 | -1.686±0.674 | 1.09E-15 |
| cg06971096 | 2  | 220173591 | PTPRN         | -2.324±0.367 | -1.187±0.836 | 1.09E-15 |
| cg18669381 | 1  | 16539088  | ARHGEF19      | -0.496±0.19  | -1.124±0.463 | 1.11E-15 |

|            |    |           |              |              |              |          |
|------------|----|-----------|--------------|--------------|--------------|----------|
| cg15489294 | 5  | 115297853 | AQPEP        | -1.555±0.363 | -0.408±0.846 | 1.13E-15 |
| cg08458170 | 19 | 31770476  | TSHZ3        | 3.847±0.26   | 2.291±1.155  | 1.15E-15 |
| cg06303238 | 20 | 50418959  | SALL4        | 1.163±0.33   | 2.256±0.807  | 1.15E-15 |
| cg25856811 | 1  | 152973957 | SPRR3        | 0.531±0.273  | -0.65±0.877  | 1.15E-15 |
| cg00933411 | 8  | 13373090  | DLC1         | -0.081±0.278 | -1.123±0.772 | 1.16E-15 |
| cg27089714 | 8  | 126097158 | KIAA0196     | -0.056±0.278 | 0.684±0.538  | 1.16E-15 |
| cg27063986 | 4  | 116035232 | NDST4        | 0.15±0.31    | 1.253±0.817  | 1.16E-15 |
| cg24628744 | 5  | 134735654 | H2AFY        | -0.705±0.319 | 0.244±0.697  | 1.16E-15 |
| cg14972143 | 4  | 99851003  | EIF4E        | -1.578±0.497 | -2.562±0.672 | 1.17E-15 |
| cg12172720 | 5  | 150019603 | SYNPO        | -0.014±0.295 | 0.698±0.512  | 1.21E-15 |
| cg22459146 | 3  | 172167030 | GHSR         | -1.121±0.308 | -0.365±0.545 | 1.22E-15 |
| cg23988567 | 14 | 106237542 | 0            | 1.864±0.187  | 1.047±0.607  | 1.22E-15 |
| cg10895543 | 9  | 21968832  | CDKN2A       | -2.765±0.453 | -1.106±1.231 | 1.23E-15 |
| cg06269753 | 8  | 72755871  | LOC100132891 | -2.312±0.289 | -1.257±0.783 | 1.25E-15 |
| cg12438037 | 9  | 138393570 | MRPS2        | -0.266±0.239 | 0.383±0.475  | 1.25E-15 |
| cg12559031 | 17 | 48046365  | DLX4         | -3.641±0.256 | -4.199±0.394 | 1.25E-15 |
| cg27513764 | 17 | 60457961  | EFCAB3       | 1.587±0.303  | 0.389±0.89   | 1.27E-15 |
| cg22740783 | 2  | 27341458  | CGREF1       | -3.171±0.329 | -2.083±0.805 | 1.28E-15 |
| cg06144905 | 17 | 27369780  | PIPOX        | -0.93±0.199  | -1.85±0.685  | 1.29E-15 |
| cg21087137 | 12 | 75728469  | GLIPR1L1     | -4.01±0.326  | -2.139±1.394 | 1.29E-15 |
| cg11812218 | 3  | 172166920 | GHSR         | -3.187±0.499 | -1.671±1.119 | 1.34E-15 |
| cg08097755 | 7  | 100808488 | VGf          | -4.294±0.401 | -2.91±1.027  | 1.36E-15 |
| cg11096993 | 11 | 67417958  | ACY3         | -0.451±0.272 | -1.226±0.57  | 1.37E-15 |
| cg14378057 | 6  | 42788563  | GLTSCR1L     | 0.825±0.207  | 1.192±0.238  | 1.38E-15 |
| cg07092725 | 14 | 63568796  | KCNH5        | 2.922±0.45   | 1.544±1.018  | 1.39E-15 |
| cg13224710 | 18 | 3411743   | TGIF1        | 2.184±0.162  | 1.524±0.492  | 1.39E-15 |
| cg05890484 | 5  | 78407552  | BHMT         | -1.477±0.425 | 0.272±1.303  | 1.40E-15 |
| cg24654350 | 19 | 55328867  | KIR3DL1      | 1.474±0.202  | 0.474±0.747  | 1.44E-15 |
| cg26599006 | 22 | 19137371  | GSC2         | -4.141±0.724 | -1.961±1.612 | 1.48E-15 |
| cg21434954 | 1  | 152783137 | LCE1B        | 1.223±0.205  | 0.127±0.82   | 1.50E-15 |
| cg02899772 | 16 | 84002599  | NECAB2       | -4.428±0.433 | -2.77±1.237  | 1.50E-15 |
| cg10149836 | 17 | 29719312  | RAB11FIP4    | -2.293±0.265 | -1.188±0.826 | 1.53E-15 |
| cg26482939 | 19 | 3136710   | GNA15        | -0.549±0.466 | -1.634±0.78  | 1.54E-15 |
| cg06388544 | 1  | 25598878  | RHD          | 0.731±0.275  | 1.363±0.453  | 1.54E-15 |
| cg11308840 | 9  | 32783516  | TMEM215      | -3.006±0.359 | -1.773±0.918 | 1.54E-15 |
| cg24664957 | 12 | 123381003 | VPS37B       | 0.17±0.306   | 1.127±0.71   | 1.55E-15 |
| cg24512973 | 1  | 155161784 | MUC1         | 0.809±0.325  | -0.456±0.945 | 1.56E-15 |
| cg11237817 | 19 | 55235762  | KIR3DL3      | 1.294±0.233  | 0.293±0.749  | 1.56E-15 |
| cg07959477 | 12 | 10251879  | CLEC1A       | -0.203±0.343 | 0.651±0.621  | 1.58E-15 |
| cg03297731 | 16 | 30124293  | GDPD3        | 0.426±0.218  | -0.321±0.556 | 1.61E-15 |
| cg21930712 | 19 | 51761116  | SIGLECL1     | 0.863±0.244  | -0.22±0.811  | 1.62E-15 |
| cg10189695 | 4  | 8582300   | GPR78        | -2.774±0.5   | -1.229±1.146 | 1.62E-15 |
| cg18420965 | 4  | 66535145  | EPHA5        | -2.591±0.503 | -1.118±1.09  | 1.67E-15 |
| cg10848367 | 11 | 62009065  | SCGB1D2      | 0.349±0.213  | -0.581±0.697 | 1.70E-15 |
| cg12827188 | 4  | 155511987 | FGA          | -0.394±0.27  | -1.078±0.507 | 1.77E-15 |
| cg02055963 | 13 | 28543520  | CDX2         | -3.452±0.383 | -1.918±1.15  | 1.78E-15 |
| cg13641903 | 11 | 32452608  | WT1          | -0.003±0.331 | 0.763±0.552  | 1.79E-15 |
| cg02131995 | 19 | 35772917  | HAMP         | 0.458±0.258  | -0.465±0.69  | 1.83E-15 |
| cg01871995 | 8  | 17754363  | FGL1         | 0.765±0.265  | 0.025±0.547  | 1.84E-15 |
| cg02196730 | 15 | 80188777  | MTHFS        | -2.547±0.565 | -3.439±0.53  | 1.86E-15 |
| cg15046693 | 19 | 33863876  | CEBPG        | 0.521±0.372  | -0.754±0.953 | 1.87E-15 |
| cg07752420 | 9  | 21968681  | CDKN2A       | -2.511±0.28  | -1.005±1.131 | 1.87E-15 |
| cg07971188 | 6  | 31431100  | HCP5         | -2.229±0.337 | -2.897±0.463 | 1.93E-15 |
| cg21331821 | 19 | 58545149  | ZSCAN1       | -4.024±0.601 | -1.903±1.589 | 2.00E-15 |
| cg10207917 | 17 | 61997029  | GH1          | 0.266±0.086  | -0.027±0.219 | 2.00E-15 |
| cg24939733 | 11 | 85397684  | CCDC89       | 0.238±0.322  | 0.992±0.546  | 2.03E-15 |
| cg04478795 | 7  | 128828120 | SMO          | -3.012±0.464 | -1.553±1.089 | 2.04E-15 |
| cg02833725 | 1  | 156696768 | ISG20L2      | 0.584±0.237  | -0.234±0.613 | 2.06E-15 |
| cg01568736 | 18 | 61441730  | SERPINB7     | 2.811±0.258  | 1.411±1.055  | 2.07E-15 |
| cg17965019 | 6  | 27858545  | HIST1H3J     | -3.639±0.365 | -1.013±1.977 | 2.08E-15 |
| cg17405586 | 12 | 53074257  | KRT1         | 1.138±0.225  | 0.176±0.725  | 2.10E-15 |
| cg07374637 | 21 | 31875448  | KRTAP19-5    | 2.195±0.243  | 0.887±0.985  | 2.11E-15 |
| cg06143901 | 20 | 591400    | TCF15        | 0.133±0.225  | 0.893±0.569  | 2.14E-15 |
| cg01129459 | 14 | 60386828  | LRRC9        | -2.856±0.29  | -1.556±0.98  | 2.17E-15 |
| cg03001305 | 17 | 40439492  | STAT5A       | -1.419±0.406 | -0.082±1.002 | 2.21E-15 |
| cg17399166 | 1  | 158149795 | CD1D         | 2.218±0.364  | 1.017±0.9    | 2.23E-15 |
| cg13112511 | 5  | 58882753  | PDE4D        | 1.749±0.327  | 2.484±0.529  | 2.24E-15 |
| cg19226099 | 20 | 54824085  | MC3R         | 1.354±0.309  | 0.565±0.581  | 2.24E-15 |
| cg21096591 | 16 | 32265019  | TP53TG3D     | -0.67±0.275  | -0.14±0.365  | 2.28E-15 |
| cg12513379 | 19 | 15838397  | OR10H2       | -0.817±0.256 | -1.635±0.613 | 2.28E-15 |

|            |    |           |          |              |              |          |
|------------|----|-----------|----------|--------------|--------------|----------|
| cg16715722 | 10 | 102890296 | TLX1NB   | 1.209±0.339  | 1.866±0.453  | 2.30E-15 |
| cg21274570 | 19 | 8117671   | CCL25    | 0.89±0.316   | 1.555±0.472  | 2.31E-15 |
| cg26489108 | 9  | 975856    | DMRT3    | -2.297±0.241 | -0.925±1.037 | 2.32E-15 |
| cg25145670 | 17 | 46655164  | HOXB4    | -2.519±0.402 | -0.832±1.273 | 2.32E-15 |
| cg25813714 | 19 | 15782945  | CYP4F12  | 3.284±0.186  | 2.439±0.638  | 2.33E-15 |
| cg19697981 | 6  | 108487820 | NR2E1    | -3.186±0.325 | -1.801±1.046 | 2.40E-15 |
| cg12907644 | 11 | 18270341  | SAA2     | 0.359±0.204  | -0.339±0.525 | 2.44E-15 |
| cg00970325 | 3  | 142683176 | PAQR9    | -3.508±0.436 | -1.935±1.185 | 2.44E-15 |
| cg15337897 | 11 | 69634400  | FGF3     | -3.509±0.478 | -1.969±1.156 | 2.46E-15 |
| cg13553204 | 1  | 26504548  | CNKSRI   | 0.05±0.316   | -0.977±0.771 | 2.47E-15 |
| cg11653466 | 8  | 38386235  | C8orf86  | -0.376±0.228 | 0.249±0.465  | 2.48E-15 |
| cg15236866 | 2  | 172948825 | DLX1     | -2.649±0.37  | -1.542±0.828 | 2.49E-15 |
| cg07696033 | 11 | 44326410  | ALX4     | -2.99±0.438  | -1.603±1.041 | 2.49E-15 |
| cg17020834 | 5  | 152870258 | GRIA1    | -3.722±0.623 | -1.625±1.577 | 2.50E-15 |
| cg00846036 | 11 | 84634126  | DLG2     | -0.197±0.36  | 0.782±0.727  | 2.50E-15 |
| cg11258532 | 16 | 66877873  | CA7      | 2.568±0.178  | 2.121±0.328  | 2.51E-15 |
| cg21349901 | 7  | 4630518   | 0        | 2.039±0.188  | 1.47±0.426   | 2.54E-15 |
| cg02724472 | 7  | 102553293 | LRRIC17  | -1.248±0.377 | -0.143±0.826 | 2.61E-15 |
| cg11494699 | 11 | 36588217  | RAG1     | 2.294±0.262  | 1.365±0.701  | 2.61E-15 |
| cg27319898 | 7  | 88389003  | ZNF804B  | -3.605±0.354 | -2.121±1.123 | 2.61E-15 |
| cg11290225 | 8  | 145692591 | KIFC2    | -2.497±0.253 | -3.067±0.413 | 2.70E-15 |
| cg14654926 | 5  | 44388688  | FGF10    | -3.279±0.39  | -1.912±1.032 | 2.71E-15 |
| cg13645811 | 6  | 158403520 | SYNJ2    | -2.148±0.306 | -2.786±0.453 | 2.72E-15 |
| cg17190608 | 12 | 111471489 | CUX2     | -4.615±0.474 | -2.919±1.282 | 2.80E-15 |
| cg08749917 | 3  | 186915320 | RTP1     | -0.326±0.239 | 0.598±0.7    | 2.86E-15 |
| cg16324018 | 2  | 85580627  | RETSAT   | 0.902±0.291  | -0.044±0.713 | 2.90E-15 |
| cg23663653 | 14 | 106209207 | 0        | 1.945±0.205  | 1.156±0.598  | 2.92E-15 |
| cg02932669 | 13 | 102068258 | NALCN    | -2.374±0.453 | -1.129±0.929 | 2.96E-15 |
| cg09107315 | 1  | 78511488  | GIPC2    | -1.254±0.28  | -0.197±0.802 | 3.08E-15 |
| cg09964921 | 21 | 35885767  | KCNE1    | 1.69±0.219   | 2.22±0.39    | 3.13E-15 |
| cg01805540 | 10 | 18429749  | CACNB2   | -3.975±0.773 | -1.943±1.511 | 3.15E-15 |
| cg07295678 | 10 | 134000009 | DPYSL4   | -2.976±0.556 | -1.503±1.097 | 3.16E-15 |
| cg26813458 | 19 | 42260485  | CEACAM6  | 2.342±0.381  | 1.223±0.841  | 3.18E-15 |
| cg12374577 | 4  | 69817049  | UGT2A3   | 0.663±0.24   | 1.299±0.474  | 3.20E-15 |
| cg24652919 | 16 | 3073191   | THOC6    | 0.399±0.246  | -0.546±0.717 | 3.22E-15 |
| cg13507429 | 1  | 18807550  | KLHDC7A  | 0.034±0.284  | -0.692±0.539 | 3.33E-15 |
| cg11438428 | 10 | 23481594  | PTF1A    | -2.68±0.629  | -0.998±1.255 | 3.34E-15 |
| cg27504299 | 14 | 96152109  | TCL1B    | 1.985±0.19   | 0.52±1.116   | 3.36E-15 |
| cg20541456 | 5  | 156696520 | CYFIP2   | -1.632±0.394 | -2.365±0.503 | 3.37E-15 |
| cg05615150 | 3  | 35683815  | ARPP21   | 1.945±0.347  | 0.742±0.912  | 3.39E-15 |
| cg05358404 | 20 | 62288950  | RTEL1    | 0.126±0.408  | 1.071±0.692  | 3.51E-15 |
| cg05389335 | 4  | 104641319 | TACR3    | -3.03±0.488  | -1.673±1.017 | 3.53E-15 |
| cg01289103 | 17 | 38821277  | KRT222   | -1.831±0.379 | -0.595±0.937 | 3.56E-15 |
| cg05159188 | 6  | 26240579  | HIST1H4F | -3.588±0.353 | -1.858±1.32  | 3.58E-15 |
| cg03634234 | 7  | 152132218 | KMT2C    | -2.542±0.409 | -2.544±0.966 | 3.58E-15 |
| cg11634198 | 17 | 37764158  | NEUROD2  | -2.147±0.203 | -1.189±0.731 | 3.58E-15 |
| cg24833277 | 8  | 124194361 | FAM83A   | 1.339±0.241  | 0.256±0.825  | 3.58E-15 |
| cg24331162 | 11 | 1855665   | SYT8     | 0.653±0.191  | -0.102±0.575 | 3.59E-15 |
| cg25511429 | 6  | 6008125   | NRN1     | -2.47±0.219  | -0.881±1.212 | 3.59E-15 |
| cg09768051 | 1  | 70224402  | LRRIC7   | 1.953±0.303  | 0.791±0.875  | 3.64E-15 |
| cg09079275 | 5  | 157003083 | ADAM19   | -3.71±0.341  | -2.44±0.967  | 3.69E-15 |
| cg08659707 | 2  | 20527677  | PUM2     | 1.341±0.293  | 0.344±0.757  | 3.70E-15 |
| cg04797323 | 12 | 93966978  | SOC2     | -2.515±0.583 | -0.592±1.459 | 3.76E-15 |
| cg07090813 | 1  | 120254330 | PHGDH    | -1.46±0.356  | -2.116±0.448 | 3.78E-15 |
| cg12417466 | 3  | 35683819  | ARPP21   | 2.004±0.296  | 0.954±0.799  | 3.81E-15 |
| cg17217677 | 16 | 68483194  | SMPD3    | 1.827±0.288  | 2.411±0.416  | 3.83E-15 |
| cg23771603 | 10 | 26223310  | MYO3A    | -3.382±0.703 | -1.629±1.303 | 4.03E-15 |
| cg14611174 | 14 | 60975837  | SIX6     | -3.962±0.376 | -2.312±1.261 | 4.03E-15 |
| cg12052765 | 10 | 50816963  | CHAT     | -3.691±0.416 | -2.285±1.07  | 4.07E-15 |
| cg19423014 | 18 | 59560091  | RNF152   | -4.57±0.5    | -2.972±1.213 | 4.08E-15 |
| cg02786019 | 7  | 142582859 | TRPV6    | 1.003±0.276  | 0.008±0.759  | 4.16E-15 |
| cg11389172 | 10 | 50818299  | SLC18A3  | -3.849±0.955 | -1.981±1.316 | 4.17E-15 |
| cg25978208 | 15 | 25093244  | SNRPN    | 0.514±0.243  | 1.232±0.543  | 4.31E-15 |
| cg20289911 | 20 | 816362    | FAM110A  | -2.238±0.404 | -1.039±0.908 | 4.41E-15 |
| cg03815350 | 12 | 53663042  | ESPL1    | 1.699±0.196  | 2.261±0.425  | 4.42E-15 |
| cg10807560 | 2  | 40656665  | SLC8A1   | 2.54±0.194   | 1.309±0.945  | 4.45E-15 |
| cg08427977 | 10 | 50323832  | VSTM4    | -0.439±0.258 | -1.005±0.413 | 4.57E-15 |
| cg00756887 | 1  | 161059654 | PVRL4    | 0.962±0.2    | 0.172±0.605  | 4.58E-15 |
| cg04623955 | 14 | 102026376 | DIO3     | -2.519±0.408 | -1.065±1.113 | 4.89E-15 |
| cg07085271 | 20 | 33813815  | MMP24    | -0.103±0.238 | 0.664±0.585  | 4.91E-15 |

|            |    |           |              |              |              |          |
|------------|----|-----------|--------------|--------------|--------------|----------|
| cg21197871 | 8  | 96036803  | NDUFAF6      | -1.115±0.251 | -1.829±0.541 | 4.92E-15 |
| cg14850026 | 1  | 62660191  | L1TD1        | 1.359±0.204  | 1.964±0.46   | 4.99E-15 |
| cg02276665 | 5  | 138088442 | CTNNA1       | -0.677±0.233 | -1.267±0.441 | 5.03E-15 |
| cg20437604 | 1  | 150954554 | ANXA9        | 0.678±0.216  | -0.231±0.699 | 5.04E-15 |
| cg26614073 | 3  | 47517819  | SCAP         | -0.047±0.266 | -0.827±0.593 | 5.14E-15 |
| cg20691580 | 11 | 116701044 | APOC3        | 2.201±0.292  | 1.338±0.656  | 5.17E-15 |
| cg02906939 | 2  | 138721315 | HNMT         | 2.48±0.278   | 0.953±1.176  | 5.22E-15 |
| cg03556497 | 20 | 37352792  | SLC32A1      | -3.582±0.253 | -2.472±0.854 | 5.26E-15 |
| cg13084525 | 11 | 34642463  | EHF          | -1.275±0.315 | -1.987±0.524 | 5.28E-15 |
| cg20025656 | 1  | 229570230 | ACTA1        | -2.843±0.356 | -1.72±0.857  | 5.30E-15 |
| cg07456201 | 16 | 20363711  | UMOD         | 1.416±0.314  | 0.269±0.87   | 5.35E-15 |
| cg16862361 | 2  | 31637622  | XDH          | 0.696±0.234  | -0.315±0.77  | 5.50E-15 |
| cg06641366 | 1  | 90097604  | FLJ27354     | 1.401±0.264  | 2.291±0.682  | 5.51E-15 |
| cg09872233 | 17 | 4544925   | ALOX15       | -4.457±0.488 | -2.814±1.259 | 5.59E-15 |
| cg19202384 | 17 | 79894511  | PYCR1        | 0.715±0.156  | -0.04±0.582  | 5.60E-15 |
| cg18110483 | 5  | 79330959  | THBS4        | -3.91±0.475  | -2.188±1.323 | 5.74E-15 |
| cg10910775 | 17 | 45266517  | CDC27        | 0.984±0.167  | 0.64±0.248   | 5.78E-15 |
| cg18457737 | 11 | 133715076 | SPATA19      | 0.406±0.346  | -0.516±0.689 | 5.81E-15 |
| cg03923934 | 11 | 133402230 | OPCML        | -3.401±0.293 | -2.239±0.895 | 5.84E-15 |
| cg25176823 | 7  | 5632593   | FSCN1        | -3.005±0.285 | -1.849±0.891 | 5.86E-15 |
| cg02936740 | 4  | 68995995  | TMPRSS11F    | 1.282±0.246  | 0.379±0.687  | 5.88E-15 |
| cg09548084 | 6  | 8436218   | LOC100506207 | 0.944±0.402  | -0.191±0.863 | 5.95E-15 |
| cg01457622 | 22 | 22988833  | GGTLC2       | 2.82±0.285   | 1.954±0.661  | 6.09E-15 |
| cg01885635 | 3  | 40566085  | ZNF621       | -2.752±0.294 | -3.278±0.36  | 6.09E-15 |
| cg00134787 | 17 | 10419499  | MYH1         | 1.57±0.284   | 0.407±0.897  | 6.16E-15 |
| cg26620157 | 14 | 37130297  | PAX9         | -2.131±0.392 | -0.724±1.083 | 6.23E-15 |
| cg06244417 | 9  | 137809628 | FCN1         | 1.691±0.234  | 0.914±0.596  | 6.23E-15 |
| cg18137704 | 22 | 17602681  | LOC100996342 | -2.841±0.352 | -1.896±0.715 | 6.23E-15 |
| cg03173722 | 4  | 71587640  | RUFY3        | -1.217±0.463 | -0.404±0.552 | 6.23E-15 |
| cg13608094 | 11 | 69461236  | CCND1        | 2.857±0.443  | 3.573±0.457  | 6.38E-15 |
| cg26894575 | 1  | 153518054 | S100A4       | -1.83±0.381  | -2.761±0.698 | 6.47E-15 |
| cg01124420 | 2  | 109605518 | EDAR         | -1.325±0.265 | -1.917±0.437 | 6.50E-15 |
| cg22161476 | 4  | 163085081 | FSTL5        | -4.344±0.529 | -2.853±1.135 | 6.53E-15 |
| cg03387497 | 20 | 17680945  | BANF2        | 2.193±0.233  | 1.481±0.545  | 6.55E-15 |
| cg00013618 | 22 | 22380839  | 0            | 2.035±0.289  | 1.08±0.734   | 6.64E-15 |
| cg19614321 | 20 | 4804581   | RASSF2       | -2.556±0.348 | -1.565±0.756 | 6.65E-15 |
| cg18705067 | 7  | 75914998  | SRRM3        | 3.93±0.473   | 4.999±0.792  | 6.67E-15 |
| cg22797169 | 2  | 102803407 | IL1RL2       | 0.458±0.225  | -0.334±0.61  | 6.74E-15 |
| cg03112433 | 7  | 90338555  | CDK14        | 0.472±0.379  | -0.763±0.95  | 6.78E-15 |
| cg00862290 | 3  | 178984973 | KCNMB3       | 0.662±0.333  | 1.392±0.539  | 7.04E-15 |
| cg09229912 | 12 | 111471963 | CUX2         | -4.105±1.188 | -1.756±1.685 | 7.15E-15 |
| cg09628707 | 20 | 43729410  | KCNS1        | -1.044±0.239 | -0.402±0.488 | 7.16E-15 |
| cg14646244 | 7  | 107300287 | SLC26A4      | -0.896±0.295 | -2.062±0.903 | 7.25E-15 |
| cg11241627 | 7  | 19185165  | FERD3L       | -3.895±0.426 | -2.072±1.413 | 7.29E-15 |
| cg15060813 | 19 | 36428308  | LRFN3        | -0.614±0.373 | 0.346±0.727  | 7.50E-15 |
| cg27318318 | 11 | 44332849  | ALX4         | -4.376±0.474 | -3.107±0.966 | 7.57E-15 |
| cg05522383 | 4  | 111557894 | PITX2        | -2.517±0.237 | -1.006±1.173 | 7.57E-15 |
| cg02250787 | 13 | 47470989  | HTR2A        | -3.01±0.335  | -1.58±1.109  | 7.65E-15 |
| cg18771300 | 14 | 63671737  | RHOJ         | -1.122±0.406 | -0.041±0.822 | 7.67E-15 |
| cg08687901 | 6  | 26204924  | HIST1H4E     | -4.858±0.492 | -2.812±1.587 | 7.75E-15 |
| cg17255302 | 12 | 52828461  | KRT75        | 1.823±0.235  | 0.795±0.798  | 7.85E-15 |
| cg21965997 | 10 | 135150367 | CALY         | -3.66±0.53   | -1.806±1.433 | 7.85E-15 |
| cg19042947 | 14 | 95027441  | SERPINA4     | 0.285±0.177  | -0.496±0.606 | 7.93E-15 |
| cg09543783 | 19 | 47248096  | FKRP         | 2.565±0.342  | 3.116±0.355  | 8.09E-15 |
| cg25033144 | 19 | 55048290  | KIR3DX1      | 2.607±0.288  | 1.359±0.969  | 8.11E-15 |
| cg21165909 | 2  | 211419938 | CPS1         | 1.948±0.262  | 0.851±0.852  | 8.14E-15 |
| cg26251101 | 2  | 46768944  | RHOQ         | -3.526±0.377 | -4.149±0.409 | 8.14E-15 |
| cg22268164 | 8  | 110099750 | TRHR         | 1.905±0.4    | 0.47±1.112   | 8.14E-15 |
| cg20795401 | 2  | 173291908 | ITGA6        | -1.379±0.188 | -2.009±0.487 | 8.15E-15 |
| cg26353877 | 1  | 159557886 | APCS         | 2.301±0.26   | 1.169±0.879  | 8.15E-15 |
| cg23950724 | 12 | 33593177  | SYT10        | -0.938±0.366 | -0.001±0.71  | 8.15E-15 |
| cg14472601 | 5  | 180019112 | SCGB3A1      | 1.016±0.31   | 0.033±0.758  | 8.19E-15 |
| cg15484375 | 11 | 18287647  | SAA1         | 0.001±0.189  | -0.761±0.592 | 8.22E-15 |
| cg00563926 | 1  | 92352481  | TGFBR3       | -0.574±0.311 | -1.448±0.67  | 8.22E-15 |
| cg03780486 | 11 | 6817280   | OR6A2        | 0.988±0.234  | 0.028±0.746  | 8.28E-15 |
| cg01471384 | 4  | 107957265 | DKK2         | -4.597±0.399 | -2.874±1.339 | 8.30E-15 |
| cg22337624 | 16 | 72126421  | TXNL4B       | -0.181±0.32  | 0.582±0.574  | 8.34E-15 |
| cg00744433 | 21 | 18884067  | CXADR        | 0.455±0.271  | -0.693±0.893 | 8.39E-15 |
| cg05826823 | 9  | 130968072 | CIZ1         | 1.227±0.363  | 0.372±0.642  | 8.42E-15 |
| cg06224510 | 10 | 7745454   | ITIH2        | -0.074±0.237 | -0.709±0.479 | 8.58E-15 |

|            |    |           |          |              |              |          |
|------------|----|-----------|----------|--------------|--------------|----------|
| cg26637069 | 11 | 57004294  | APLNR    | 0.986±0.325  | 1.663±0.496  | 8.69E-15 |
| cg23563234 | 5  | 140797286 | PCDHGB7  | -2.667±0.316 | -1.253±1.101 | 8.70E-15 |
| cg04491443 | 16 | 20415966  | PDILT    | 3.593±0.313  | 2.217±1.071  | 8.71E-15 |
| cg04121771 | 3  | 149191624 | TM4SF4   | -0.456±0.278 | -1.391±0.725 | 8.84E-15 |
| cg15441973 | 2  | 138721317 | HNMT     | 1.802±0.226  | 0.688±0.869  | 8.89E-15 |
| cg27138018 | 1  | 156589303 | HAPLN2   | -1.865±0.283 | -2.682±0.628 | 9.02E-15 |
| cg01305421 | 12 | 102874286 | IGF1     | -1.25±0.334  | -0.303±0.72  | 9.03E-15 |
| cg12875426 | 18 | 46987532  | DYM      | 0.713±0.377  | -0.223±0.71  | 9.07E-15 |
| cg15944856 | 2  | 197676146 | C2orf66  | 1.39±0.196   | 0.573±0.636  | 9.23E-15 |
| cg24650229 | 3  | 118864825 | IGSF11   | 3.692±0.406  | 2.103±1.238  | 9.55E-15 |
| cg13262687 | 4  | 147559579 | POU4F2   | -2.898±0.328 | -1.567±1.037 | 9.59E-15 |
| cg03625911 | 1  | 203155737 | CHI3L1   | 0.183±0.167  | -0.44±0.485  | 9.68E-15 |
| cg06529761 | 16 | 3702486   | DNASE1   | 1.871±0.24   | 2.326±0.325  | 9.68E-15 |
| cg08578734 | 5  | 152870490 | GRIA1    | -2.373±0.391 | -0.759±1.26  | 9.82E-15 |
| cg17657618 | 1  | 15427654  | KAZN     | 0.33±0.364   | -0.647±0.749 | 9.82E-15 |
| cg15599064 | 6  | 26285655  | HIST1H4H | -1.734±0.399 | -0.792±0.711 | 1.04E-14 |
| cg22334665 | 6  | 110797497 | SLC22A16 | -4.307±0.523 | -2.415±1.475 | 1.05E-14 |
| cg22268231 | 19 | 50922484  | SPIB     | -1.158±0.32  | -0.152±0.78  | 1.05E-14 |
| cg11161417 | 17 | 31319454  | SPACA3   | 0.092±0.301  | -0.633±0.549 | 1.06E-14 |
| cg10246520 | 13 | 53601944  | OLFM4    | 3.88±0.332   | 2.368±1.184  | 1.08E-14 |
| cg13121699 | 2  | 185462397 | ZNF804A  | -4.029±0.288 | -2.181±1.448 | 1.09E-14 |
| cg24625128 | 11 | 133939064 | JAM3     | -5.164±0.439 | -2.863±1.804 | 1.11E-14 |
| cg14950072 | 18 | 7118122   | LAMA1    | -3.766±0.408 | -2.71±0.809  | 1.12E-14 |
| cg25366404 | 6  | 39895360  | MOCS1    | 0.723±0.187  | 0.124±0.466  | 1.13E-14 |
| cg10298815 | 1  | 101004474 | GPR88    | -4.099±0.503 | -2.263±1.434 | 1.14E-14 |
| cg19528976 | 7  | 100823280 | NAT16    | -3.981±0.449 | -2.375±1.254 | 1.15E-14 |
| cg23559331 | 17 | 40332958  | KCNH4    | -3.447±0.358 | -1.669±1.395 | 1.15E-14 |
| cg20311730 | 11 | 7985183   | NLRP10   | 2.134±0.294  | 0.766±1.072  | 1.15E-14 |
| cg16924616 | 7  | 96653617  | DLX5     | -4.054±0.46  | -1.739±1.817 | 1.17E-14 |
| cg23239444 | 6  | 34433320  | PACSIN1  | -1.648±0.308 | -0.746±0.699 | 1.17E-14 |
| cg20357628 | 20 | 58179847  | PHACTR3  | -3.058±0.308 | -1.416±1.289 | 1.18E-14 |
| cg15452573 | 4  | 90758843  | SNCA     | -4.893±0.534 | -3.022±1.461 | 1.18E-14 |
| cg18829411 | 21 | 40722023  | HMGN1    | -0.349±0.336 | -1.308±0.742 | 1.20E-14 |
| cg10088985 | 4  | 74864313  | CXCL5    | -3.882±0.609 | -1.833±1.599 | 1.21E-14 |
| cg12120741 | 13 | 78492306  | EDNRB    | -0.381±0.359 | 0.557±0.72   | 1.22E-14 |
| cg04439215 | 13 | 45768901  | KCTD4    | 0.698±0.313  | 1.333±0.461  | 1.23E-14 |
| cg11822964 | 19 | 47129337  | PTGIR    | 0.502±0.304  | 1.077±0.412  | 1.24E-14 |
| cg03928182 | 12 | 71314662  | PTPRR    | -3.337±0.264 | -2.259±0.846 | 1.28E-14 |
| cg05718253 | 19 | 11347359  | DOCK6    | 2.147±0.319  | 2.929±0.597  | 1.28E-14 |
| cg02071074 | 13 | 52585283  | ATP7B    | -3.098±0.359 | -2.036±0.825 | 1.32E-14 |
| cg02793099 | 19 | 57350004  | PEG3     | 0.14±0.218   | 0.892±0.589  | 1.33E-14 |
| cg05056120 | 5  | 158527702 | EBF1     | -2.787±0.201 | -1.51±1.006  | 1.34E-14 |
| cg18236079 | 17 | 13505590  | HS3ST3A1 | -4.38±0.478  | -3.074±1.01  | 1.35E-14 |
| cg21282997 | 2  | 103035835 | IL18RAP  | 0.1±0.291    | -0.816±0.706 | 1.36E-14 |
| cg01601573 | 4  | 144256835 | GAB1     | -0.119±0.234 | -0.812±0.539 | 1.38E-14 |
| cg11136562 | 5  | 141061285 | ARAP3    | -0.462±0.218 | 0.137±0.463  | 1.40E-14 |
| cg04629204 | 1  | 26348325  | EXTL1    | -0.851±0.146 | -0.332±0.407 | 1.40E-14 |
| cg22705225 | 5  | 31640216  | 0        | -0.584±0.219 | 0.186±0.604  | 1.40E-14 |
| cg07066326 | 11 | 910094    | CHID1    | -0.799±0.21  | -1.378±0.448 | 1.42E-14 |
| cg02314308 | 1  | 184006972 | COLGALT2 | -2.68±0.32   | -3.375±0.521 | 1.43E-14 |
| cg06126510 | 5  | 22142613  | PMCHL1   | 0.883±0.171  | 0.1±0.617    | 1.43E-14 |
| cg18219418 | 15 | 72563529  | PARP6    | 1.809±0.222  | 2.296±0.366  | 1.45E-14 |
| cg11657808 | 1  | 237205950 | RYR2     | -3.96±0.47   | -2.189±1.394 | 1.51E-14 |
| cg25975818 | 17 | 77704298  | ENPP7    | 3.163±0.333  | 2.625±0.355  | 1.51E-14 |
| cg24447890 | 15 | 75105144  | LMAN1L   | 1.06±0.23    | 1.703±0.499  | 1.51E-14 |
| cg14322224 | 1  | 85931226  | DDAH1    | -1.099±0.256 | -1.899±0.625 | 1.51E-14 |
| cg08575537 | 7  | 100318626 | EPO      | -1.669±0.605 | -0.364±0.978 | 1.52E-14 |
| cg13449778 | 1  | 179712298 | FAM163A  | -4.073±0.646 | -2.084±1.554 | 1.53E-14 |
| cg20308679 | 2  | 183731407 | FRZB     | -3.51±0.372  | -2.241±0.996 | 1.54E-14 |
| cg17509612 | 9  | 132598774 | USP20    | -2.137±0.282 | -1.191±0.742 | 1.54E-14 |
| cg22876908 | 12 | 56325149  | DGKA     | -0.958±0.19  | -1.55±0.463  | 1.55E-14 |
| cg12365667 | 6  | 33043976  | HLA-DPB1 | -2.589±0.346 | -3.252±0.481 | 1.55E-14 |
| cg15937958 | 19 | 42947133  | CXCL17   | 1.203±0.241  | 0.237±0.762  | 1.55E-14 |
| cg08475088 | 19 | 56249291  | NLRP9    | 2.93±0.318   | 1.623±1.031  | 1.56E-14 |
| cg17950095 | 7  | 27224700  | HoxA11   | -1.361±0.241 | -0.256±0.873 | 1.56E-14 |
| cg06908778 | 10 | 22634602  | SPAG6    | -2.629±0.307 | -1.1±1.209   | 1.58E-14 |
| cg25661884 | 19 | 10124267  | RDH8     | 0.006±0.255  | -0.754±0.594 | 1.58E-14 |
| cg06566994 | 3  | 44596384  | ZKSCAN7  | 0.631±0.298  | 1.509±0.686  | 1.61E-14 |
| cg02422694 | 17 | 46655790  | HOXB4    | -3.756±0.33  | -1.794±1.552 | 1.62E-14 |
| cg04471507 | 1  | 26233376  | STMN1    | -0.306±0.373 | -1.209±0.692 | 1.65E-14 |

|            |    |           |                  |              |              |          |
|------------|----|-----------|------------------|--------------|--------------|----------|
| cg14165663 | 17 | 74070269  | <i>GALR2</i>     | -1.341±0.345 | -0.503±0.643 | 1.66E-14 |
| cg21440587 | 6  | 31583458  | <i>AIF1</i>      | -2.301±0.292 | -1.311±0.779 | 1.67E-14 |
| cg17051321 | 15 | 83952508  | <i>BNC1</i>      | -2.715±0.331 | -1.566±0.905 | 1.70E-14 |
| cg19111262 | 1  | 159916126 | <i>IGSF9</i>     | 0.25±0.279   | -0.759±0.796 | 1.74E-14 |
| cg09674867 | 11 | 8954206   | <i>C11orf16</i>  | 1.527±0.415  | 0.562±0.736  | 1.77E-14 |
| cg20767356 | 1  | 150693100 | <i>HORMAD1</i>   | 2.677±0.328  | 3.317±0.469  | 1.77E-14 |
| cg09053680 | 10 | 135044114 | <i>UTF1</i>      | -3.8±1.049   | -1.487±1.749 | 1.77E-14 |
| cg06264060 | 22 | 41075007  | <i>MCHR1</i>     | 1.384±0.263  | 2.004±0.474  | 1.78E-14 |
| cg11653709 | 9  | 21968146  | <i>CDKN2A</i>    | -2.427±0.267 | -1.247±0.935 | 1.81E-14 |
| cg22946150 | 15 | 84116107  | <i>SH3GL3</i>    | -4.748±0.848 | -2.591±1.669 | 1.84E-14 |
| cg13928961 | 12 | 53012009  | <i>KRT73</i>     | 3.391±0.326  | 1.976±1.121  | 1.84E-14 |
| cg00875272 | 1  | 47695321  | <i>TAL1</i>      | -3.34±0.407  | -1.938±1.106 | 1.84E-14 |
| cg23111544 | 2  | 79347474  | <i>REG1A</i>     | 1.599±0.359  | 0.514±0.852  | 1.90E-14 |
| cg09427311 | 9  | 129885730 | <i>ANGPTL2</i>   | -1.644±0.478 | -0.434±0.936 | 1.92E-14 |
| cg19421752 | 5  | 1225224   | <i>SLC6A18</i>   | -0.114±0.237 | -1.128±0.804 | 1.93E-14 |
| cg05997860 | 14 | 70923895  | <i>ADAM21</i>    | 0.408±0.258  | -0.572±0.776 | 1.94E-14 |
| cg26727372 | 18 | 48404491  | <i>ME2</i>       | -1.635±0.294 | -2.193±0.403 | 1.98E-14 |
| cg18515587 | 1  | 151344806 | <i>SELENBP1</i>  | -0.49±0.261  | -1.448±0.759 | 1.98E-14 |
| cg02244695 | 7  | 150497346 | <i>TMEM176B</i>  | -3.268±0.518 | -1.82±1.133  | 2.04E-14 |
| cg01871963 | 9  | 130910995 | <i>LCN2</i>      | 2.877±0.251  | 2.187±0.539  | 2.05E-14 |
| cg25629694 | 17 | 62657497  | <i>SMURF2</i>    | -1.444±0.51  | -2.363±0.656 | 2.05E-14 |
| cg10968815 | 20 | 31595346  | <i>BPIFB2</i>    | 1.817±0.248  | 0.583±0.982  | 2.06E-14 |
| cg24697031 | 17 | 74023714  | <i>EVPL</i>      | 0.313±0.203  | -0.297±0.48  | 2.10E-14 |
| cg17288121 | 8  | 7288014   | <i>DEFB103A</i>  | 1.689±0.357  | 0.776±0.71   | 2.22E-14 |
| cg22534509 | 12 | 123215119 | <i>HCAR1</i>     | -0.819±0.203 | -1.632±0.646 | 2.22E-14 |
| cg08260891 | 20 | 44518802  | <i>CTSA</i>      | -3.205±0.594 | -1.843±1.044 | 2.28E-14 |
| cg09601629 | 19 | 15122224  | <i>CCDC105</i>   | -2.959±0.445 | -1.824±0.884 | 2.40E-14 |
| cg19368582 | 10 | 88716646  | <i>MMRN2</i>     | -0.027±0.202 | 0.552±0.456  | 2.41E-14 |
| cg20904010 | 22 | 33402393  | <i>SYN3</i>      | 2.515±0.36   | 1.391±0.889  | 2.43E-14 |
| cg27543230 | 5  | 133562604 | <i>PPP2CA</i>    | -3.647±0.3   | -4.247±0.447 | 2.46E-14 |
| cg12854483 | 19 | 11649671  | <i>CNN1</i>      | -2.459±0.42  | -1.357±0.861 | 2.51E-14 |
| cg01424107 | 13 | 28543113  | <i>CDX2</i>      | -4.453±0.495 | -2.731±1.369 | 2.52E-14 |
| cg21513553 | 21 | 47518637  | <i>COL6A2</i>    | -3.883±0.996 | -2.011±1.367 | 2.54E-14 |
| cg19928046 | 5  | 149792249 | <i>CD74</i>      | -4.567±0.423 | -5.348±0.567 | 2.56E-14 |
| cg26829131 | 12 | 54393375  | <i>HOXC9</i>     | -4.314±0.486 | -2.473±1.468 | 2.62E-14 |
| cg14473145 | 14 | 38725656  | <i>CLEC14A</i>   | -0.493±0.211 | 0.31±0.641   | 2.62E-14 |
| cg03278643 | 4  | 5710767   | <i>EVC2</i>      | -0.035±0.177 | 0.766±0.64   | 2.63E-14 |
| cg11219178 | 11 | 3120949   | <i>OSBPL5</i>    | 0.932±0.177  | 1.332±0.308  | 2.64E-14 |
| cg04845628 | 3  | 97690690  | <i>MINA</i>      | -1.936±0.29  | -2.594±0.506 | 2.65E-14 |
| cg05820087 | 3  | 193272561 | <i>ATP13A4</i>   | -0.147±0.293 | -1.033±0.702 | 2.65E-14 |
| cg13663218 | 12 | 72666976  | <i>TRHDE-AS1</i> | -2.344±0.544 | -0.934±1.103 | 2.70E-14 |
| cg26832879 | 19 | 54620073  | <i>TFPT</i>      | 0.913±0.412  | 1.636±0.514  | 2.70E-14 |
| cg05130485 | 2  | 202098257 | <i>CASP8</i>     | -1.521±0.329 | -2.12±0.432  | 2.71E-14 |
| cg17347634 | 8  | 65711916  | <i>CYP7B1</i>    | -0.086±0.3   | -1.104±0.81  | 2.72E-14 |
| cg05194726 | 12 | 2944480   | <i>NRIP2</i>     | -2.017±0.504 | -0.989±0.773 | 2.77E-14 |
| cg16708981 | 19 | 53758609  | <i>ZNF677</i>    | -1.993±0.686 | -0.572±1.072 | 2.80E-14 |
| cg17718302 | 6  | 27858637  | <i>HIST1H3J</i>  | -4.724±0.582 | -2.234±1.994 | 2.86E-14 |
| cg19554294 | 19 | 53761868  | <i>VN1R2</i>     | 1.128±0.312  | 0.082±0.833  | 2.89E-14 |
| cg14137939 | 11 | 85397109  | <i>CCDC89</i>    | -0.139±0.259 | 0.624±0.605  | 3.04E-14 |
| cg05292376 | 17 | 79095236  | <i>AATK</i>      | 1.384±0.203  | 0.773±0.485  | 3.04E-14 |
| cg15439078 | 3  | 46904643  | <i>MYL3</i>      | 3.23±0.32    | 2.656±0.413  | 3.06E-14 |
| cg20695587 | 4  | 68995759  | <i>TMPRSS11F</i> | 0.849±0.242  | -0.034±0.706 | 3.07E-14 |
| cg13993218 | 11 | 2181866   | <i>INS-IGF2</i>  | 0.59±0.254   | -0.222±0.647 | 3.07E-14 |
| cg20008332 | 2  | 5833169   | <i>SOX11</i>     | -3.577±0.688 | -1.79±1.403  | 3.13E-14 |
| cg03365437 | 15 | 58357874  | <i>ALDH1A2</i>   | -2.546±0.423 | -1.205±1.068 | 3.14E-14 |
| cg09243900 | 1  | 156030844 | <i>RAB25</i>     | 0.746±0.273  | -0.322±0.856 | 3.17E-14 |
| cg15602809 | 1  | 239792464 | <i>CHRM3</i>     | 0.526±0.118  | 0.296±0.171  | 3.18E-14 |
| cg11225410 | 12 | 93966317  | <i>SOCS2</i>     | -5.313±0.526 | -3.385±1.545 | 3.22E-14 |
| cg23158811 | 19 | 19729732  | <i>PBX4</i>      | -4.185±0.486 | -5.08±0.653  | 3.22E-14 |
| cg03943081 | 10 | 133110646 | <i>TCERG1L</i>   | -2.864±0.443 | -1.414±1.157 | 3.24E-14 |
| cg08569678 | 8  | 143781397 | <i>LY6K</i>      | 0.011±0.399  | -1.249±1.004 | 3.26E-14 |
| cg12530080 | 5  | 22141639  | <i>PMCHL1</i>    | 0.953±0.242  | -0.346±1.046 | 3.27E-14 |
| cg23887396 | 17 | 26699551  | <i>SARM1</i>     | -3.546±0.4   | -1.714±1.473 | 3.27E-14 |
| cg22972055 | 7  | 872293    | <i>SUN1</i>      | 0.913±0.288  | -0.215±0.905 | 3.32E-14 |
| cg03562120 | 20 | 43343997  | <i>WISP2</i>     | -0.415±0.285 | -1.361±0.756 | 3.34E-14 |
| cg25384595 | 19 | 55105156  | <i>LILRA1</i>    | 0.151±0.308  | -0.676±0.652 | 3.34E-14 |
| cg11214889 | 18 | 597111    | <i>CLUL1</i>     | -2.14±0.296  | -2.867±0.569 | 3.34E-14 |
| cg22418909 | 8  | 41166738  | <i>SFRP1</i>     | -2.425±0.688 | -1.023±1.059 | 3.39E-14 |
| cg25107903 | 8  | 7321359   | <i>SPAG11B</i>   | -0.09±0.18   | -0.696±0.485 | 3.43E-14 |
| cg02248486 | 7  | 27183196  | <i>HOXA5</i>     | -0.955±0.475 | 0.284±0.975  | 3.43E-14 |

|            |    |           |             |              |              |          |
|------------|----|-----------|-------------|--------------|--------------|----------|
| cg14277764 | 5  | 70671764  | PMCHL2      | 0.858±0.203  | 0.094±0.614  | 3.43E-14 |
| cg08477744 | 1  | 17308032  | MFAP2       | 2.996±0.315  | 2.206±0.62   | 3.46E-14 |
| cg13882988 | 10 | 54531345  | MBL2        | 1.877±0.255  | 0.896±0.788  | 3.51E-14 |
| cg14473924 | 3  | 73674170  | PDZRN3      | -2.155±0.432 | -0.918±0.983 | 3.52E-14 |
| cg23719124 | 1  | 110254919 | GSTM5       | 0.525±0.703  | 1.516±0.576  | 3.60E-14 |
| cg01722450 | 18 | 61816636  | LINC00305   | 2.693±0.322  | 1.425±1.021  | 3.63E-14 |
| cg11191210 | 6  | 117585815 | VGLL2       | -3.645±0.337 | -2.254±1.12  | 3.67E-14 |
| cg20885089 | 1  | 110162701 | AMPD2       | -3.81±0.411  | -4.346±0.251 | 3.69E-14 |
| cg06547766 | 3  | 187930704 | LPP         | 0.396±0.336  | -0.43±0.64   | 3.78E-14 |
| cg02218324 | 19 | 46318439  | RSPH6A      | 1.546±0.24   | 2.203±0.521  | 3.82E-14 |
| cg15835825 | 7  | 154862030 | HTR5A       | -4.429±0.419 | -2.767±1.339 | 3.83E-14 |
| cg12970084 | 1  | 201977080 | 0           | 0.181±0.236  | -0.752±0.752 | 3.92E-14 |
| cg19884262 | 10 | 129535968 | FOXI2       | -3.56±0.602  | -1.97±1.259  | 4.03E-14 |
| cg06825142 | 11 | 637170    | DRD4        | -4.699±0.612 | -2.329±1.912 | 4.10E-14 |
| cg20516209 | 2  | 27301943  | EMILIN1     | 0.667±0.16   | 1.201±0.429  | 4.17E-14 |
| cg27183007 | 7  | 50132975  | ZBPB        | 0.365±0.181  | 0.911±0.437  | 4.27E-14 |
| cg19946699 | 21 | 40817645  | SH3BGR      | -0.419±0.233 | -0.853±0.32  | 4.28E-14 |
| cg14546153 | 20 | 57090315  | APCDD1L-AS1 | -3.271±0.383 | -1.953±1.06  | 4.30E-14 |
| cg06639544 | 19 | 14940319  | OR7A5       | 1.109±0.236  | 0.072±0.839  | 4.32E-14 |
| cg08687163 | 3  | 49940853  | MST1R       | 1.626±0.254  | 0.853±0.619  | 4.32E-14 |
| cg17274742 | 7  | 23286539  | GNPNMB      | 0.198±0.28   | -0.804±0.808 | 4.38E-14 |
| cg16772514 | 17 | 43046872  | C1QL1       | -0.249±0.248 | 0.417±0.529  | 4.38E-14 |
| cg26589285 | 19 | 39787011  | IFNL1       | 0.529±0.29   | -0.257±0.625 | 4.41E-14 |
| cg21312148 | 1  | 152636074 | LCE2D       | 1.473±0.259  | 0.048±1.156  | 4.42E-14 |
| cg12954718 | 17 | 5031366   | USP6        | 0.109±0.215  | -0.44±0.434  | 4.55E-14 |
| cg05697976 | 12 | 29376483  | FAR2        | 0.505±0.355  | -0.495±0.799 | 4.59E-14 |
| cg25203856 | 11 | 7059980   | NLRP14      | 1.155±0.191  | 0.21±0.767   | 4.63E-14 |
| cg26803305 | 18 | 43304452  | SLC14A1     | 0.639±0.307  | -0.105±0.58  | 4.70E-14 |
| cg00463848 | 12 | 53046105  | KRT2        | 2.282±0.268  | 1.372±0.734  | 4.70E-14 |
| cg22496652 | 9  | 92094625  | SEMA4D      | 1.12±0.177   | 0.806±0.228  | 4.70E-14 |
| cg04597449 | 5  | 94955575  | GPR150      | -1.976±0.277 | -0.977±0.807 | 4.70E-14 |
| cg27553955 | 2  | 42720326  | KCNG3       | -1.759±0.277 | -0.634±0.911 | 4.71E-14 |
| cg03534410 | 3  | 12801112  | TMEM40      | 2.515±0.348  | 1.59±0.735   | 4.71E-14 |
| cg11939496 | 1  | 160833560 | CD244       | 1.071±0.343  | 1.725±0.489  | 4.79E-14 |
| cg00229387 | 6  | 43445942  | TJAP1       | -1.266±0.214 | -1.835±0.453 | 4.80E-14 |
| cg15798455 | 3  | 71833907  | PROK2       | -4.208±0.48  | -2.707±1.208 | 4.82E-14 |
| cg02409351 | 12 | 85674022  | ALX1        | -3.223±0.396 | -1.827±1.129 | 4.87E-14 |
| cg14813083 | 11 | 18477280  | LDHAL6A     | 0.925±0.465  | 1.78±0.632   | 4.87E-14 |
| cg05767404 | 1  | 247712591 | GCSAML      | 0.48±0.449   | -0.943±1.146 | 4.94E-14 |
| cg14614901 | 9  | 32783463  | TMEM215     | -3.779±0.433 | -2.376±1.131 | 4.95E-14 |
| cg25133016 | 12 | 57984719  | PIP4K2C     | -2.918±0.316 | -3.584±0.512 | 4.97E-14 |
| cg22463915 | 20 | 62131260  | EEF1A2      | -0.529±0.403 | 0.524±0.838  | 4.98E-14 |
| cg00117172 | 1  | 25255838  | RUNX3       | -3.349±0.346 | -1.114±1.819 | 4.99E-14 |
| cg02196805 | 5  | 131409637 | CSF2        | 0.052±0.208  | -0.73±0.634  | 4.99E-14 |
| cg20792294 | 11 | 2165425   | IGF2-AS     | -3.532±0.439 | -1.785±1.417 | 5.02E-14 |
| cg09220361 | 5  | 161494515 | GABRG2      | -2.575±0.362 | -1.207±1.108 | 5.04E-14 |
| cg07271264 | 11 | 17740977  | MYOD1       | -2.695±0.521 | -1.178±1.217 | 5.05E-14 |
| cg19826026 | 12 | 15114393  | ARHGDI1B    | -1.601±0.305 | -2.282±0.531 | 5.10E-14 |
| cg18279742 | 16 | 2015703   | RPS2        | -0.531±0.313 | -1.28±0.59   | 5.19E-14 |
| cg05774801 | 4  | 154709756 | SFRP2       | -3.575±0.327 | -2.125±1.179 | 5.27E-14 |
| cg13035743 | 6  | 32119685  | PRRT1       | -2.5±0.385   | -0.948±1.26  | 5.28E-14 |
| cg01962826 | 6  | 34100967  | GRM4        | 3.361±0.307  | 1.888±1.199  | 5.35E-14 |
| cg00195561 | 11 | 46408584  | CHRM4       | 2.569±0.233  | 1.857±0.573  | 5.36E-14 |
| cg06638451 | 3  | 58563269  | FAM107A     | -1.901±0.512 | -0.773±0.879 | 5.45E-14 |
| cg00509670 | 14 | 37130313  | PAX9        | -1.824±0.276 | -0.537±1.049 | 5.50E-14 |
| cg16612699 | 11 | 124311218 | OR8B8       | 2.317±0.227  | 1.293±0.834  | 5.51E-14 |
| cg11983245 | 17 | 39675154  | KRT15       | 0.474±0.23   | -0.207±0.548 | 5.58E-14 |
| cg02723533 | 11 | 69468991  | CCND1       | 5.552±0.448  | 3.142±1.965  | 5.60E-14 |
| cg25214366 | 8  | 7287673   | DEFB103B    | 1.525±0.305  | 0.672±0.684  | 5.70E-14 |
| cg23040064 | 16 | 87635784  | JPH3        | -4.513±0.437 | -2.863±1.341 | 5.76E-14 |
| cg12207371 | 12 | 7655803   | CD163       | 0.42±0.351   | -0.537±0.767 | 5.88E-14 |
| cg20892287 | 11 | 128893851 | ARHGAP32    | 1.149±0.329  | 0.409±0.573  | 5.88E-14 |
| cg01888166 | 2  | 20527635  | PUM2        | 1.716±0.44   | 0.641±0.852  | 5.89E-14 |
| cg24623271 | 13 | 100635002 | ZIC2        | -2.901±0.288 | -1.842±0.861 | 6.06E-14 |
| cg07780979 | 5  | 303287    | AHRR        | 3.21±0.363   | 3.967±0.584  | 6.06E-14 |
| cg26240939 | 16 | 20913414  | LYRM1       | 0.249±0.304  | -0.576±0.661 | 6.06E-14 |
| cg10189763 | 4  | 71337726  | MUC7        | 0.362±0.301  | -0.504±0.697 | 6.06E-14 |
| cg23877385 | 15 | 59908652  | GCNT3       | 1.56±0.25    | 0.573±0.805  | 6.17E-14 |
| cg03199651 | 4  | 4862770   | MSX1        | -3.877±0.364 | -2.305±1.283 | 6.18E-14 |
| cg17727529 | 1  | 156399685 | C1orf61     | -2.831±0.273 | -1.959±0.706 | 6.19E-14 |

|            |    |           |                   |              |              |          |
|------------|----|-----------|-------------------|--------------|--------------|----------|
| cg09871043 | 6  | 51952361  | <i>PKHD1</i>      | -0.034±0.249 | -0.822±0.638 | 6.19E-14 |
| cg20980592 | 6  | 46761035  | <i>MEP1A</i>      | 2.663±0.388  | 3.363±0.517  | 6.24E-14 |
| cg11959435 | 9  | 21440836  | <i>IFNA1</i>      | 1.74±0.278   | 0.938±0.646  | 6.28E-14 |
| cg01318557 | 7  | 73624319  | <i>LAT2</i>       | -1.688±0.37  | -2.61±0.734  | 6.41E-14 |
| cg24975842 | 20 | 57416221  | <i>GNAS</i>       | -0.124±0.137 | 0.474±0.489  | 6.41E-14 |
| cg19873701 | 19 | 43773649  | <i>PSG9</i>       | 0.661±0.183  | 0.182±0.383  | 6.43E-14 |
| cg14313310 | 1  | 184006816 | <i>COLGALT2</i>   | -2.613±0.33  | -3.463±0.68  | 6.45E-14 |
| cg22628926 | 17 | 4844700   | <i>RNF167</i>     | -1.48±0.288  | -2.152±0.531 | 6.66E-14 |
| cg13870494 | 9  | 72658358  | <i>MAMDC2</i>     | -1.086±0.363 | -0.121±0.775 | 6.80E-14 |
| cg19067730 | 20 | 44518824  | <i>CTSA</i>       | -2.867±0.522 | -1.655±0.957 | 6.85E-14 |
| cg22141781 | 12 | 95397704  | <i>NDUFA12</i>    | -3.575±0.383 | -4.175±0.409 | 6.85E-14 |
| cg21667836 | 12 | 3599355   | <i>PRMT8</i>      | -2.266±0.321 | -1.097±0.954 | 6.94E-14 |
| cg27221338 | 7  | 6525025   | <i>KDELRL2</i>    | 2.365±0.329  | 1.025±1.097  | 7.06E-14 |
| cg25913233 | 5  | 151066683 | <i>SPARC</i>      | -3.766±0.425 | -2.515±1.013 | 7.21E-14 |
| cg16413535 | 4  | 164395149 | <i>TKTL2</i>      | 2.98±0.275   | 1.945±0.846  | 7.25E-14 |
| cg06542614 | 10 | 97051255  | <i>PDLIM1</i>     | 0.836±0.24   | 0.257±0.461  | 7.28E-14 |
| cg09617773 | 6  | 76783708  | <i>IMPG1</i>      | 0.948±0.207  | 0.25±0.569   | 7.28E-14 |
| cg18493147 | 19 | 474445    | <i>ODF3L2</i>     | 2.016±0.338  | 2.786±0.608  | 7.30E-14 |
| cg12840719 | 9  | 21968233  | <i>CDKN2A</i>     | -2.636±0.287 | -1.38±1.03   | 7.33E-14 |
| cg07903918 | 9  | 101471986 | <i>GABBR2</i>     | -3.314±0.517 | -1.713±1.301 | 7.42E-14 |
| cg18003231 | 22 | 18043745  | <i>SLC25A18</i>   | 1.752±0.247  | 2.306±0.436  | 7.53E-14 |
| cg10521852 | 19 | 19739820  | <i>LPAR2</i>      | -0.515±0.289 | -1.385±0.706 | 7.56E-14 |
| cg11068096 | 17 | 39742623  | <i>KRT14</i>      | 1.877±0.202  | 1.359±0.415  | 7.57E-14 |
| cg19723473 | 2  | 168675040 | <i>B3GALT1</i>    | 1.561±0.31   | 0.497±0.869  | 7.62E-14 |
| cg07442479 | 5  | 37839769  | <i>GDNF</i>       | -2.271±0.39  | -1.058±0.987 | 7.73E-14 |
| cg14415034 | 3  | 45730717  | <i>SACM1L</i>     | -3.439±0.443 | -2.751±0.467 | 7.77E-14 |
| cg01169726 | 7  | 96654425  | <i>DLX5</i>       | -2.98±0.362  | -1.869±0.904 | 7.80E-14 |
| cg16986846 | 11 | 61976174  | <i>SCGB2A1</i>    | 0.089±0.367  | -0.804±0.713 | 7.91E-14 |
| cg08331313 | 5  | 151066460 | <i>SPARC</i>      | -4.966±0.541 | -3.559±1.131 | 7.94E-14 |
| cg24402880 | 4  | 84035837  | <i>PLAC8</i>      | -0.276±0.283 | -0.938±0.525 | 7.95E-14 |
| cg15905124 | 5  | 72464325  | <i>0</i>          | 2.138±0.271  | 1.278±0.701  | 8.03E-14 |
| cg16626670 | 19 | 7797031   | <i>CLEC4G</i>     | 0.599±0.142  | 1.207±0.5    | 8.03E-14 |
| cg15207619 | 13 | 49975643  | <i>CAB39L</i>     | -1.602±0.274 | -2.301±0.562 | 8.05E-14 |
| cg00983520 | 22 | 51017067  | <i>CPT1B</i>      | -1.94±0.511  | -0.871±0.832 | 8.12E-14 |
| cg15503752 | 17 | 74639731  | <i>ST6GALNAC1</i> | -0.152±0.256 | -0.939±0.641 | 8.12E-14 |
| cg16158681 | 16 | 56623109  | <i>MT3</i>        | -2.842±0.441 | -1.396±1.181 | 8.14E-14 |
| cg07033083 | 7  | 72424763  | <i>NSUN5P2</i>    | -2.237±0.395 | -2.936±0.516 | 8.28E-14 |
| cg10642330 | 20 | 36150061  | <i>NNAT</i>       | 1.025±0.251  | 1.826±0.653  | 8.29E-14 |
| cg22305782 | 16 | 30937214  | <i>FBXL19</i>     | 3.996±0.266  | 4.454±0.333  | 8.32E-14 |
| cg14757296 | 3  | 50349918  | <i>HYAL1</i>      | 2.629±0.275  | 2.045±0.457  | 8.32E-14 |
| cg04740359 | 12 | 5603542   | <i>NTF3</i>       | 0.537±0.217  | -0.57±0.912  | 8.34E-14 |
| cg10604646 | 1  | 163172649 | <i>RGS5</i>       | 0.081±0.402  | 0.984±0.713  | 8.43E-14 |
| cg03104936 | 7  | 50849168  | <i>GRB10</i>      | 0.999±0.396  | 1.821±0.64   | 8.48E-14 |
| cg04505023 | 1  | 152956186 | <i>SPRR1A</i>     | 0.952±0.262  | -0.089±0.856 | 8.57E-14 |
| cg20640433 | 6  | 129204206 | <i>LAMA2</i>      | -2.895±0.461 | -1.422±1.203 | 8.68E-14 |
| cg13644052 | 16 | 3010410   | <i>0</i>          | 1.365±0.34   | 0.509±0.688  | 8.68E-14 |
| cg13948987 | 6  | 55039259  | <i>HCRTR2</i>     | -4.357±0.575 | -2.701±1.346 | 8.73E-14 |
| cg15310162 | 21 | 37852822  | <i>CLDN14</i>     | 0.72±0.234   | 1.302±0.463  | 8.73E-14 |
| cg03732545 | 1  | 205012130 | <i>CNTN2</i>      | -2.152±0.282 | -1.262±0.727 | 8.73E-14 |
| cg15555014 | 17 | 76164144  | <i>SYNGR2</i>     | -0.418±0.225 | -0.987±0.457 | 8.86E-14 |
| cg27444994 | 16 | 62070072  | <i>CDH8</i>       | -4.204±0.55  | -2.697±1.221 | 8.90E-14 |
| cg01036779 | 19 | 6768251   | <i>SH2D3A</i>     | -1.736±0.358 | -2.426±0.528 | 8.91E-14 |
| cg01543654 | 17 | 46800639  | <i>HOXB-AS5</i>   | -2.689±0.609 | -1.384±1.024 | 8.96E-14 |
| cg25477904 | 19 | 43383405  | <i>PSG1</i>       | 2.018±0.296  | 1.247±0.622  | 8.99E-14 |
| cg16652063 | 17 | 6616653   | <i>SLC13A5</i>    | -3.135±0.451 | -1.805±1.084 | 9.06E-14 |
| cg13631913 | 1  | 9600345   | <i>SLC25A33</i>   | -4.096±0.404 | -4.687±0.379 | 9.09E-14 |
| cg15774153 | 11 | 69518773  | <i>FGF19</i>      | -4.082±0.771 | -2.531±1.2   | 9.14E-14 |
| cg23413307 | 1  | 152747472 | <i>LCE1F</i>      | 1.435±0.331  | 0.053±1.141  | 9.48E-14 |
| cg11560645 | 14 | 106238198 | <i>0</i>          | 1.135±0.235  | 0.334±0.658  | 9.49E-14 |
| cg11847808 | 1  | 22889611  | <i>EPHA8</i>      | -2.891±0.348 | -1.727±0.955 | 9.54E-14 |
| cg06630241 | 12 | 93967711  | <i>SOCS2</i>      | -0.45±0.352  | 0.377±0.661  | 9.58E-14 |
| cg27363486 | 1  | 228603645 | <i>TRIM17</i>     | 0.863±0.211  | 1.441±0.47   | 9.83E-14 |
| cg14458615 | 3  | 118864952 | <i>C3orf30</i>    | 1.259±0.328  | -0.016±1.051 | 9.88E-14 |
| cg04415689 | 2  | 242128250 | <i>ANO7</i>       | 2.433±0.229  | 1.785±0.528  | 9.92E-14 |
| cg20373326 | 16 | 82068803  | <i>HSD17B2</i>    | 0.563±0.191  | -0.191±0.623 | 9.99E-14 |
| cg11739626 | 19 | 50381908  | <i>AKT1S1</i>     | 1.655±0.232  | 2.13±0.37    | 1.02E-13 |
| cg19937039 | 14 | 94759767  | <i>SERPINA10</i>  | 0.087±0.269  | -0.852±0.773 | 1.02E-13 |
| cg20542800 | 14 | 24782534  | <i>LTB4R</i>      | -0.559±0.315 | 0.376±0.765  | 1.03E-13 |
| cg15531099 | 1  | 152770502 | <i>LCE1D</i>      | 0.432±0.269  | -0.582±0.837 | 1.03E-13 |
| cg09030119 | 19 | 44905343  | <i>ZNF285</i>     | -2.024±0.301 | -1.012±0.834 | 1.07E-13 |

|            |    |           |           |              |              |          |
|------------|----|-----------|-----------|--------------|--------------|----------|
| cg17749456 | 19 | 55792696  | HSPBP1    | -2.117±0.39  | -1.344±0.599 | 1.08E-13 |
| cg26850754 | 2  | 87088796  | ANAPC1P1  | -2.749±0.466 | -1.175±1.296 | 1.09E-13 |
| cg26907768 | 16 | 87902420  | SLC7A5    | -2.932±0.265 | -3.535±0.48  | 1.09E-13 |
| cg01731341 | 12 | 4554295   | FGF6      | 2.542±0.385  | 1.488±0.858  | 1.11E-13 |
| cg19018097 | 11 | 65601328  | SNX32     | -5.218±0.618 | -2.918±1.901 | 1.12E-13 |
| cg26033681 | 15 | 25069376  | SNRPN     | -0.652±0.251 | -1.118±0.354 | 1.12E-13 |
| cg20576002 | 12 | 54867653  | GTSF1     | 2.077±0.223  | 1.188±0.736  | 1.12E-13 |
| cg23752985 | 2  | 85803571  | VAMP8     | 0.76±0.399   | 1.873±0.909  | 1.13E-13 |
| cg04355435 | 1  | 43736290  | TMEM125   | -2.897±0.466 | -3.712±0.604 | 1.13E-13 |
| cg24363955 | 5  | 32788467  | NPR3      | 2.212±0.258  | 0.933±1.061  | 1.13E-13 |
| cg16470760 | 12 | 6898217   | CD4       | 1.602±0.319  | 0.876±0.58   | 1.14E-13 |
| cg18979762 | 1  | 231560395 | EGLN1     | 1.488±0.309  | 1.99±0.358   | 1.17E-13 |
| cg03561565 | 8  | 99438624  | KCNS2     | -2.812±0.43  | -1.44±1.129  | 1.18E-13 |
| cg02537838 | 20 | 61002595  | RBBP8NL   | 0.666±0.229  | -0.167±0.689 | 1.19E-13 |
| cg02860342 | 15 | 73661484  | HCN4      | -1.568±0.239 | -0.788±0.643 | 1.20E-13 |
| cg15582789 | 9  | 99145525  | SLC35D2   | -1.93±0.361  | -1.249±0.522 | 1.20E-13 |
| cg18438777 | 4  | 164265745 | NPY5R     | -3.041±0.406 | -1.687±1.117 | 1.20E-13 |
| cg08441170 | 10 | 26223100  | MYO3A     | -2.773±0.719 | -1.383±1.072 | 1.22E-13 |
| cg11594137 | 9  | 91605981  | C9orf47   | -1.997±0.379 | -0.898±0.901 | 1.22E-13 |
| cg01274660 | 7  | 100465625 | TRIP6     | -1.183±0.324 | -2.011±0.671 | 1.23E-13 |
| cg08878744 | 1  | 152783674 | LCE1B     | 0.275±0.252  | -0.81±0.901  | 1.23E-13 |
| cg08634024 | 7  | 143657177 | OR2F1     | 2.776±0.327  | 1.411±1.134  | 1.23E-13 |
| cg26728422 | 16 | 1429015   | UNKL      | -1.439±0.556 | -2.808±1.107 | 1.24E-13 |
| cg23613317 | 5  | 154092109 | LARP1     | 1.027±0.249  | 0.074±0.791  | 1.25E-13 |
| cg19580810 | 1  | 156031182 | RAB25     | 0.225±0.234  | -0.751±0.81  | 1.26E-13 |
| cg05637351 | 18 | 63417669  | CDH7      | -4.177±0.502 | -3.129±0.825 | 1.26E-13 |
| cg04286933 | 22 | 39472743  | APOBEC3G  | -1.778±0.228 | -0.982±0.659 | 1.27E-13 |
| cg20163033 | 4  | 2627194   | FAM193A   | 1.241±0.263  | 1.774±0.417  | 1.29E-13 |
| cg25057743 | 2  | 209271505 | PTH2R     | -2.521±0.42  | -1.117±1.161 | 1.30E-13 |
| cg12491710 | 19 | 51891526  | LIM2      | 3.271±0.442  | 3.964±0.485  | 1.30E-13 |
| cg04183425 | 6  | 119221279 | ASF1A     | 0.57±0.279   | 1.332±0.623  | 1.30E-13 |
| cg01344518 | 16 | 326728    | RGS11     | 0.827±0.152  | 1.199±0.301  | 1.30E-13 |
| cg25087423 | 11 | 118754535 | CXCR5     | 3.327±0.382  | 2.182±0.942  | 1.31E-13 |
| cg16853982 | 1  | 236849389 | ACTN2     | -1.044±0.41  | 0.141±0.973  | 1.31E-13 |
| cg02641676 | 8  | 42397764  | SLC20A2   | -0.056±0.25  | -0.615±0.447 | 1.32E-13 |
| cg02927346 | 17 | 34059260  | RASL10B   | -2.07±0.364  | -1.303±0.606 | 1.33E-13 |
| cg05768141 | 1  | 160039847 | KCNJ10    | -3.801±0.285 | -2.616±0.985 | 1.33E-13 |
| cg22262964 | 2  | 89629580  | 0         | -0.631±0.2   | -1.28±0.536  | 1.35E-13 |
| cg21166999 | 6  | 117746793 | ROS1      | 1.113±0.292  | 0.296±0.669  | 1.35E-13 |
| cg13562542 | 3  | 71803339  | GPR27     | -4.121±1.126 | -2.138±1.484 | 1.35E-13 |
| cg24924779 | 20 | 49639998  | KCNG1     | -3.653±0.532 | -1.96±1.399  | 1.35E-13 |
| cg24867501 | 22 | 50925337  | MIOX      | 1.247±0.283  | 0.411±0.688  | 1.36E-13 |
| cg02946850 | 7  | 126882944 | GRM8      | 1.292±0.31   | 0.174±0.929  | 1.37E-13 |
| cg04474832 | 3  | 52008487  | ABHD14B   | -1.618±0.165 | -2.021±0.326 | 1.39E-13 |
| cg08132711 | 4  | 15964743  | FGFBP2    | 0.663±0.338  | -0.042±0.555 | 1.39E-13 |
| cg17410236 | 14 | 85996495  | FLRT2     | -3.091±0.589 | -1.361±1.424 | 1.39E-13 |
| cg03977657 | 1  | 209825747 | LAMB3     | 0.614±0.226  | -0.075±0.569 | 1.39E-13 |
| cg08468689 | 17 | 40346680  | GHDC      | -2.242±0.23  | -2.862±0.507 | 1.40E-13 |
| cg22478614 | 8  | 7752260   | DEFB4A    | 1.049±0.283  | 0.291±0.62   | 1.40E-13 |
| cg19210770 | 2  | 220379091 | ASIC4     | -4.16±0.523  | -2.52±1.356  | 1.41E-13 |
| cg14696396 | 15 | 83776446  | TM6SF1    | -3.8±0.945   | -1.723±1.658 | 1.42E-13 |
| cg25322008 | 11 | 4719138   | OR51E2    | 1.029±0.265  | 0.181±0.702  | 1.42E-13 |
| cg17586860 | 20 | 23015906  | SSTR4     | -1.578±0.51  | -0.445±0.907 | 1.42E-13 |
| cg24754277 | 9  | 90114156  | DAPK1     | -0.972±0.327 | -1.607±0.493 | 1.42E-13 |
| cg02815516 | 19 | 11306319  | KANK2     | 0.215±0.209  | 0.696±0.387  | 1.43E-13 |
| cg26750002 | 19 | 49244674  | RASIP1    | -0.927±0.356 | 0.116±0.859  | 1.43E-13 |
| cg12347740 | 16 | 70680380  | IL34      | 1.656±0.172  | 2.118±0.379  | 1.43E-13 |
| cg21909391 | 3  | 187896222 | FLJ42393  | 1.726±0.592  | 0.412±1.051  | 1.44E-13 |
| cg20131968 | 17 | 61850012  | CCDC47    | -0.488±0.245 | -1.326±0.696 | 1.44E-13 |
| cg07823492 | 17 | 46608099  | HOXB1     | 1.192±0.335  | 2.728±1.283  | 1.45E-13 |
| cg24068372 | 7  | 151107261 | WDR86     | -4.42±0.576  | -2.693±1.426 | 1.47E-13 |
| cg17127823 | 8  | 71520941  | LOC286190 | -1.282±0.273 | -1.959±0.551 | 1.47E-13 |
| cg10957151 | 2  | 176986956 | HOXD9     | -2.093±0.292 | -0.804±1.076 | 1.47E-13 |
| cg13282837 | 14 | 96180648  | TCL1A     | -0.581±0.37  | 0.548±0.933  | 1.47E-13 |
| cg07637239 | 10 | 118957259 | KCNK18    | 0.318±0.305  | -0.691±0.837 | 1.48E-13 |
| cg26104469 | 8  | 14411685  | SGCZ      | 0.017±0.281  | -0.781±0.65  | 1.48E-13 |
| cg08596000 | 11 | 104035204 | PDGFD     | -2.146±0.206 | -2.847±0.581 | 1.48E-13 |
| cg09495977 | 4  | 8271507   | HTRA3     | -4.26±0.494  | -2.636±1.347 | 1.48E-13 |
| cg27076139 | 7  | 31091718  | ADCYAP1R1 | -4.677±0.47  | -3.286±1.149 | 1.49E-13 |
| cg00495491 | 12 | 26822813  | ITPR2     | 1.507±0.208  | 1.106±0.312  | 1.52E-13 |

|            |    |           |            |              |              |          |
|------------|----|-----------|------------|--------------|--------------|----------|
| cg17291001 | 14 | 95107626  | SERPINA13P | 2.093±0.264  | 1.007±0.907  | 1.55E-13 |
| cg19005368 | 11 | 32851950  | PRRG4      | -2.832±0.412 | -3.643±0.634 | 1.56E-13 |
| cg07313155 | 17 | 38218601  | THRA       | -3.966±0.512 | -2.834±0.908 | 1.57E-13 |
| cg09595479 | 12 | 49689212  | PRPH       | -0.256±0.417 | -1.484±1.015 | 1.60E-13 |
| cg25042226 | 2  | 114036571 | PAX8       | 3.334±0.369  | 3.955±0.458  | 1.60E-13 |
| cg19404832 | 6  | 50681114  | TFAP2D     | -2.763±0.361 | -1.271±1.247 | 1.60E-13 |
| cg11119884 | 1  | 91818587  | HFM1       | 1.073±0.363  | 0.127±0.766  | 1.60E-13 |
| cg22088368 | 22 | 37404888  | TEX33      | -0.288±0.271 | 0.495±0.646  | 1.61E-13 |
| cg07766612 | 1  | 26372887  | SLC30A2    | -4.388±0.68  | -2.722±1.356 | 1.64E-13 |
| cg25047001 | 16 | 10277017  | GRIN2A     | -4.915±0.518 | -3.247±1.386 | 1.65E-13 |
| cg02501779 | 20 | 54579355  | CBLN4      | -3.982±0.448 | -2.757±1.009 | 1.66E-13 |
| cg04454050 | 6  | 41122081  | TREML1     | 0.055±0.221  | 0.757±0.583  | 1.67E-13 |
| cg15749748 | 20 | 61050560  | GATA5      | -3.405±0.574 | -1.972±1.17  | 1.69E-13 |
| cg23082877 | 19 | 49243427  | RASIP1     | -0.061±0.248 | 0.645±0.583  | 1.69E-13 |
| cg04856858 | 2  | 236402015 | AGAP1      | -3.013±0.58  | -1.761±1.001 | 1.70E-13 |
| cg20951444 | 1  | 33337112  | FNDC5      | 1.174±0.219  | 0.385±0.659  | 1.70E-13 |
| cg18572014 | 18 | 51038068  | DCC        | 1.783±0.219  | 1.327±0.363  | 1.73E-13 |
| cg22074858 | 1  | 89488430  | GBP3       | -2.729±0.367 | -3.615±0.722 | 1.73E-13 |
| cg08997253 | 9  | 104500729 | GRIN3A     | -3.645±0.468 | -2.198±1.202 | 1.75E-13 |
| cg02148642 | 2  | 110549586 | RGPD6      | 0.225±0.263  | -0.535±0.629 | 1.76E-13 |
| cg11297236 | 16 | 20416475  | PDILT      | 1.299±0.314  | 0.086±1.016  | 1.79E-13 |
| cg02800334 | 8  | 124750855 | ANXA13     | 0.314±0.362  | 0.962±0.483  | 1.81E-13 |
| cg05947740 | 8  | 22089778  | PHYHIP     | -1.06±0.282  | -0.368±0.565 | 1.82E-13 |
| cg03916421 | 4  | 130013461 | SCLT1      | -0.124±0.209 | 0.439±0.465  | 1.83E-13 |
| cg27239157 | 3  | 183145817 | MCF2L2     | -3.895±0.502 | -2.505±1.148 | 1.84E-13 |
| cg00333528 | 6  | 89927485  | GABRR1     | -1.244±0.297 | -0.315±0.774 | 1.88E-13 |
| cg22815214 | 1  | 201083145 | ASCL5      | -1.263±0.506 | -2.088±0.6   | 1.89E-13 |
| cg25002911 | 13 | 49039986  | RB1        | 1.863±0.203  | 1.409±0.367  | 1.90E-13 |
| cg02938601 | 8  | 22961088  | TNFRSF10C  | -2.593±0.352 | -3.454±0.704 | 1.91E-13 |
| cg07550362 | 7  | 97361201  | TAC1       | -3.231±0.371 | -1.949±1.073 | 1.96E-13 |
| cg20399252 | 13 | 50266227  | EBPL       | 3.375±0.423  | 1.76±1.355   | 1.96E-13 |
| cg09649610 | 1  | 235814039 | GNG4       | -1.654±0.483 | -0.394±1.038 | 1.97E-13 |
| cg01837719 | 6  | 96463185  | FUT9       | -3.597±0.22  | -2.434±0.98  | 1.99E-13 |
| cg05260966 | 22 | 33197394  | TIMP3      | -1.751±0.308 | -1.123±0.499 | 1.99E-13 |
| cg03464655 | 2  | 165811982 | SLC38A11   | -0.748±0.368 | 0.273±0.845  | 2.00E-13 |
| cg24715735 | 19 | 35531403  | HPN        | -0.195±0.264 | 0.608±0.669  | 2.03E-13 |
| cg00073650 | 16 | 88922166  | GALNS      | 1.186±0.199  | 1.703±0.426  | 2.03E-13 |
| cg08032971 | 1  | 46972736  | DMBX1      | 1.638±0.265  | 2.062±0.307  | 2.03E-13 |
| cg05307923 | 10 | 1779667   | ADARB2     | -4.789±0.382 | -3.293±1.257 | 2.03E-13 |
| cg13652336 | 8  | 68864012  | PREX2      | -3.202±0.522 | -2.211±0.772 | 2.03E-13 |
| cg18691434 | 7  | 99775425  | STAG3      | -2.253±0.467 | -0.769±1.239 | 2.05E-13 |
| cg11849692 | 10 | 103875969 | LDB1       | 1.701±0.269  | 2.301±0.486  | 2.08E-13 |
| cg23617760 | 16 | 84681507  | KLHL36     | 1.123±0.255  | -0.096±1.028 | 2.08E-13 |
| cg20442697 | 7  | 102553432 | LRRC17     | -0.746±0.378 | 0.493±1.036  | 2.09E-13 |
| cg10157098 | 7  | 128354967 | FAM71F1    | 1.111±0.306  | 1.81±0.568   | 2.10E-13 |
| cg15552238 | 19 | 14785749  | EMR3       | -0.402±0.231 | -1.069±0.554 | 2.12E-13 |
| cg04347447 | 3  | 50541467  | CACNA2D2   | -0.086±0.155 | 0.38±0.388   | 2.13E-13 |
| cg10605520 | 20 | 60796141  | HRH3       | -4.439±0.466 | -2.602±1.547 | 2.15E-13 |
| cg00399483 | 18 | 49868378  | DCC        | -2.449±0.381 | -1.35±0.914  | 2.16E-13 |
| cg11304234 | 11 | 112034801 | IL18       | -1.872±0.314 | -2.547±0.543 | 2.18E-13 |
| cg19685066 | 1  | 18082003  | ACTL8      | 2.322±0.345  | 1.124±1.005  | 2.20E-13 |
| cg21652012 | 5  | 170211009 | GABRP      | 3.035±0.226  | 2.535±0.404  | 2.23E-13 |
| cg17141902 | 9  | 95897216  | NINJ1      | 0.344±0.207  | -0.163±0.417 | 2.23E-13 |
| cg25081201 | 10 | 43867071  | FXYP4      | 1.745±0.348  | 1.014±0.585  | 2.24E-13 |
| cg15839448 | 8  | 41166530  | SFRP1      | -3.53±0.605  | -2.079±1.189 | 2.31E-13 |
| cg12743398 | 16 | 28609531  | SULT1A2    | -0.404±0.248 | -1.144±0.619 | 2.31E-13 |
| cg17412560 | 2  | 95963403  | KCNIP3     | -0.612±0.283 | -1.34±0.601  | 2.32E-13 |
| cg20083676 | 9  | 91605999  | C9orf47    | -1.296±0.351 | -0.245±0.877 | 2.32E-13 |
| cg04420907 | 17 | 9480215   | WDR16      | -2.775±0.633 | -4.031±0.995 | 2.33E-13 |
| cg08768421 | 9  | 74764504  | GDA        | -3.73±0.65   | -2.01±1.425  | 2.33E-13 |
| cg12108912 | 2  | 120435949 | TMEM177    | 1.335±0.326  | 0.174±0.976  | 2.34E-13 |
| cg02998425 | 14 | 70924204  | ADAM21     | 1.744±0.26   | 0.659±0.916  | 2.34E-13 |
| cg10362591 | 16 | 55689865  | SLC6A2     | -3.326±0.789 | -1.755±1.246 | 2.38E-13 |
| cg26473272 | 11 | 1856268   | SYT8       | 2.331±0.264  | 1.562±0.641  | 2.39E-13 |
| cg20807545 | 16 | 77469538  | ADAMTS18   | -1.898±0.312 | -0.847±0.884 | 2.39E-13 |
| cg07694025 | 4  | 154709441 | SFRP2      | -3.042±0.445 | -1.658±1.16  | 2.39E-13 |
| cg08942875 | 4  | 48908902  | OCLAD2     | -3.619±0.354 | -4.195±0.422 | 2.41E-13 |
| cg02611282 | 7  | 28338985  | CREB5      | 0.531±0.238  | -0.212±0.623 | 2.42E-13 |
| cg22772698 | 20 | 56195991  | ZBP1       | 0.107±0.345  | -0.526±0.49  | 2.42E-13 |
| cg25148589 | 4  | 158141936 | GRIA2      | -1.323±0.283 | -0.406±0.77  | 2.43E-13 |

|            |    |           |            |              |              |          |
|------------|----|-----------|------------|--------------|--------------|----------|
| cg03425110 | 10 | 71333037  | NEUROG3    | -4.84±0.474  | -3.041±1.517 | 2.43E-13 |
| cg04138756 | 1  | 152973849 | SPRR3      | 1.579±0.236  | 0.523±0.894  | 2.43E-13 |
| cg22373112 | 17 | 40307717  | RAB5C      | -0.462±0.268 | 0.325±0.658  | 2.45E-13 |
| cg17696091 | 1  | 115396629 | SYCP1      | 2.209±0.186  | 1.376±0.705  | 2.45E-13 |
| cg14415300 | 1  | 149813944 | HIST2H2AA4 | -4.721±0.532 | -2.471±1.903 | 2.49E-13 |
| cg06942110 | 7  | 1545385   | INTS1      | 1.579±0.318  | 0.58±0.839   | 2.50E-13 |
| cg17740305 | 1  | 89738358  | GBP5       | 1.829±0.263  | 1.414±0.298  | 2.51E-13 |
| cg12910797 | 17 | 46651722  | HOXB3      | -0.443±0.464 | 0.836±1.066  | 2.55E-13 |
| cg22892904 | 17 | 77751089  | CBX2       | -0.798±0.215 | 0.041±0.709  | 2.55E-13 |
| cg05615487 | 22 | 51176407  | ACR        | 1.605±0.24   | 0.831±0.651  | 2.56E-13 |
| cg15772361 | 18 | 61328223  | SERPINB3   | 4.856±0.289  | 3.346±1.281  | 2.57E-13 |
| cg15910079 | 14 | 21359415  | RNASE3     | 0.073±0.234  | -0.619±0.579 | 2.57E-13 |
| cg20837735 | 18 | 61144177  | SERPINB5   | 2.416±0.555  | 0.849±1.309  | 2.59E-13 |
| cg08995424 | 12 | 54070891  | ATP5G2     | -4.399±0.43  | -2.58±1.54   | 2.59E-13 |
| cg02677802 | 12 | 26822870  | ITPR2      | 1.205±0.236  | 0.84±0.259   | 2.62E-13 |
| cg14696870 | 1  | 159258877 | FCER1A     | 2.023±0.261  | 0.466±1.323  | 2.65E-13 |
| cg17277529 | 11 | 69633959  | FGF3       | -4.323±0.462 | -3.286±0.846 | 2.69E-13 |
| cg25912717 | 1  | 155176951 | THBS3      | -3.377±0.343 | -3.985±0.467 | 2.70E-13 |
| cg24250393 | 16 | 23846838  | PRKCB      | -2.573±0.325 | -1.381±1.008 | 2.75E-13 |
| cg18437633 | 2  | 161056639 | ITGB6      | 1.255±0.269  | 0.228±0.86   | 2.78E-13 |
| cg09227563 | 19 | 54984705  | CDC42EP5   | -4.466±0.472 | -3.127±1.12  | 2.78E-13 |
| cg12391048 | 16 | 2770336   | PRSS27     | 2.7±0.408    | 1.235±1.239  | 2.82E-13 |
| cg17217654 | 3  | 49058043  | NDUFAF3    | -3.559±0.337 | -4.302±0.605 | 2.88E-13 |
| cg14121103 | 3  | 43731973  | ABHD5      | -3.23±0.33   | -3.87±0.507  | 2.91E-13 |
| cg15739437 | 5  | 110407538 | TSLP       | -0.456±0.299 | -1.376±0.766 | 2.92E-13 |
| cg27590397 | 14 | 38677218  | SSTR1      | -3.358±0.349 | -2.189±0.987 | 2.93E-13 |
| cg05442902 | 22 | 21369010  | P2RX6      | -2.662±0.288 | -1.975±0.567 | 2.97E-13 |
| cg22776578 | 5  | 175223497 | CPLX2      | -3.589±0.431 | -2.265±1.115 | 2.98E-13 |
| cg11075745 | 1  | 43205976  | CLDN19     | 0.462±0.22   | 1.131±0.563  | 3.00E-13 |
| cg26580095 | 1  | 92545650  | BTBD8      | -1.113±0.308 | -1.767±0.53  | 3.01E-13 |
| cg12433691 | 2  | 109065314 | GCC2       | -4.244±0.32  | -4.747±0.363 | 3.05E-13 |
| cg11391732 | 5  | 53751919  | HSPB3      | 0.798±0.285  | 1.514±0.594  | 3.06E-13 |
| cg07260017 | 5  | 149492480 | CSF1R      | 0.376±0.258  | -0.485±0.728 | 3.06E-13 |
| cg04603031 | 15 | 78913156  | CHRNA3     | -3.379±0.78  | -1.807±1.26  | 3.07E-13 |
| cg01468621 | 11 | 1411609   | BRSK2      | -3.556±0.513 | -2.098±1.223 | 3.08E-13 |
| cg17628717 | 7  | 43351208  | HECW1      | 1.767±0.273  | 0.264±1.282  | 3.08E-13 |
| cg08623383 | 1  | 28205926  | THEMIS2    | -0.692±0.27  | 0.081±0.649  | 3.09E-13 |
| cg06139836 | 10 | 131762961 | EBF3       | -3.661±0.343 | -2.439±1.037 | 3.17E-13 |
| cg20339230 | 15 | 92937360  | ST8SIA2    | -3.607±0.541 | -1.964±1.385 | 3.17E-13 |
| cg09911755 | 17 | 45899773  | OSBPL7     | -0.42±0.245  | 0.209±0.524  | 3.17E-13 |
| cg25187533 | 19 | 43586787  | PSG2       | 0.149±0.124  | -0.246±0.333 | 3.19E-13 |
| cg09848074 | 7  | 139172610 | 0          | -0.611±0.372 | 0.113±0.577  | 3.19E-13 |
| cg20624391 | 6  | 105584149 | BVES       | -1.916±0.284 | -1.132±0.657 | 3.26E-13 |
| cg01321151 | 11 | 925523    | AP2A2      | -0.224±0.225 | 0.335±0.464  | 3.29E-13 |
| cg02992596 | 4  | 155702220 | RBM46      | 1.541±0.398  | 0.603±0.775  | 3.31E-13 |
| cg24252809 | 11 | 18957451  | MRGPRX1    | 1.649±0.196  | 0.725±0.789  | 3.34E-13 |
| cg02493771 | 21 | 31744328  | KRTAP13-2  | -1.312±0.215 | -2.144±0.708 | 3.34E-13 |
| cg22680204 | 4  | 5895098   | CRMP1      | -2.972±0.524 | -1.504±1.233 | 3.36E-13 |
| cg24495017 | 5  | 134370530 | PITX1      | -1.874±0.277 | -1.07±0.677  | 3.36E-13 |
| cg13958426 | 1  | 169396637 | CCDC181    | -4.056±0.377 | -2.373±1.436 | 3.36E-13 |
| cg01390445 | 3  | 185271312 | LIPH       | 2.88±0.344   | 1.554±1.129  | 3.41E-13 |
| cg04574507 | 1  | 158301038 | CD1B       | 1.694±0.212  | 0.525±1      | 3.41E-13 |
| cg17819635 | 1  | 67217673  | TCTEX1D1   | -2.678±0.408 | -1.235±1.227 | 3.45E-13 |
| cg03684977 | 17 | 37893803  | GRB7       | 0.785±0.284  | -0.228±0.86  | 3.45E-13 |
| cg05190718 | 1  | 116310712 | CASQ2      | 1.055±0.34   | 0.22±0.695   | 3.50E-13 |
| cg03014957 | 20 | 29956062  | DEFB118    | 0.405±0.266  | -0.443±0.718 | 3.54E-13 |
| cg19620294 | 8  | 119964729 | TNFRSF11B  | -2.085±0.344 | -1.184±0.754 | 3.56E-13 |
| cg06539804 | 20 | 2781489   | CPXM1      | -5.167±0.557 | -3.54±1.373  | 3.58E-13 |
| cg22125370 | 12 | 93966485  | SOC2       | -3.45±0.285  | -1.952±1.282 | 3.61E-13 |
| cg27383956 | 19 | 40732902  | CNTD2      | 1.097±0.243  | 0.277±0.697  | 3.61E-13 |
| cg07480567 | 17 | 13505174  | HS3ST3A1   | -3.785±0.581 | -2.385±1.162 | 3.62E-13 |
| cg07485588 | 9  | 70429213  | FOXD4L4    | -0.154±0.189 | 0.386±0.455  | 3.63E-13 |
| cg24891133 | 13 | 31480335  | MEDAG      | -4.138±0.592 | -2.571±1.313 | 3.65E-13 |
| cg22083047 | 3  | 64211464  | PRICKLE2   | 0.267±0.193  | 0.826±0.472  | 3.74E-13 |
| cg25098401 | 1  | 152658407 | LCE2B      | 0.369±0.321  | -0.529±0.756 | 3.77E-13 |
| cg18967533 | 19 | 51472725  | KLK6       | 1.174±0.198  | 0.332±0.721  | 3.86E-13 |
| cg21367957 | 13 | 113776252 | F10        | 2.789±0.454  | 1.66±0.943   | 3.91E-13 |
| cg00840516 | 3  | 50360097  | HYAL2      | -0.116±0.212 | 0.487±0.509  | 3.95E-13 |
| cg15840985 | 3  | 32023475  | OSBPL10    | -0.195±0.313 | -0.871±0.553 | 3.97E-13 |
| cg26205131 | 5  | 1444878   | SLC6A3     | -4.631±0.49  | -2.898±1.479 | 3.99E-13 |

|            |    |           |               |              |              |          |
|------------|----|-----------|---------------|--------------|--------------|----------|
| cg12275348 | 12 | 93966045  | SOCS2         | -5.152±0.374 | -3.994±0.984 | 4.01E-13 |
| cg11718090 | 1  | 145208654 | NOTCH2NL      | -2.836±0.29  | -3.358±0.408 | 4.03E-13 |
| cg03885639 | 11 | 124481310 | PANX3         | 1.853±0.152  | 1.344±0.434  | 4.10E-13 |
| cg03665605 | 7  | 99064212  | ATP5J2        | 2.722±0.327  | 1.885±0.702  | 4.17E-13 |
| cg26191951 | 14 | 21423466  | RNASE2        | 0.142±0.234  | -0.55±0.587  | 4.18E-13 |
| cg23418591 | 20 | 57090317  | APCDD1L-AS1   | -2.728±0.372 | -1.362±1.168 | 4.22E-13 |
| cg20530314 | 3  | 148415511 | AGTR1         | -3.885±0.462 | -1.93±1.677  | 4.24E-13 |
| cg02909790 | 6  | 26271587  | HIST1H3G      | -3.101±0.286 | -1.292±1.557 | 4.24E-13 |
| cg13959523 | 19 | 34175481  | CHST8         | -3.899±0.453 | -2.782±0.933 | 4.25E-13 |
| cg22296149 | 19 | 2249330   | AMH           | 1.182±0.245  | 0.393±0.673  | 4.26E-13 |
| cg06817917 | 10 | 88515527  | BMPT1A        | -3.811±0.29  | -4.22±0.273  | 4.33E-13 |
| cg21755709 | 21 | 45149398  | PDXK          | 0.22±0.289   | 0.865±0.532  | 4.34E-13 |
| cg05674444 | 21 | 14414818  | ANKRD30BP2    | -1.583±0.242 | -2.195±0.514 | 4.35E-13 |
| cg15786837 | 17 | 46806935  | HOXB13        | -4±0.338     | -2.872±0.963 | 4.36E-13 |
| cg04962134 | 11 | 55653310  | TRIM51        | 1.338±0.254  | 0.615±0.612  | 4.37E-13 |
| cg04101379 | 13 | 96297197  | DZIP1         | -3.853±0.427 | -2.516±1.139 | 4.37E-13 |
| cg24133115 | 6  | 166075520 | PDE10A        | -2.621±0.682 | -1.309±1.05  | 4.42E-13 |
| cg10894512 | 10 | 90712478  | ACTA2         | 1.048±0.235  | 1.61±0.469   | 4.44E-13 |
| cg08121954 | 4  | 156825203 | TDO2          | 1.462±0.223  | 1.894±0.347  | 4.48E-13 |
| cg20277670 | 5  | 175110375 | HRH2          | 4.959±0.334  | 3.465±1.285  | 4.49E-13 |
| cg20725021 | 3  | 187009575 | MASP1         | -0.14±0.22   | 0.558±0.595  | 4.50E-13 |
| cg11611600 | 15 | 84323154  | ADAMTSL3      | -3.648±0.518 | -2.286±1.147 | 4.54E-13 |
| cg12422450 | 14 | 93389891  | CHGA          | -2.734±0.375 | -1.013±1.481 | 4.55E-13 |
| cg10281478 | 7  | 95402528  | DYNC1I1       | -1.095±0.235 | -0.419±0.573 | 4.56E-13 |
| cg04508649 | 1  | 11249046  | ANGPTL7       | 2.212±0.344  | 2.745±0.388  | 4.56E-13 |
| cg12645220 | 20 | 9819272   | PAK7          | -3.403±0.419 | -2.229±0.994 | 4.56E-13 |
| cg07294734 | 19 | 1242323   | ATP5D         | 0.212±0.2    | -0.286±0.417 | 4.57E-13 |
| cg18668753 | 19 | 57352657  | MIMT1         | -0.057±0.177 | 0.568±0.535  | 4.59E-13 |
| cg06821993 | 8  | 114449011 | CSMD3         | -3.249±0.3   | -1.834±1.218 | 4.61E-13 |
| cg04345908 | 6  | 32731327  | HLA-DQB2      | 2.356±0.335  | 1.562±0.663  | 4.63E-13 |
| cg10370591 | 2  | 1417431   | TPO           | 1.908±0.219  | 0.799±0.956  | 4.70E-13 |
| cg23181133 | 19 | 42300812  | CEACAM3       | 0.015±0.216  | 0.796±0.67   | 4.74E-13 |
| cg10281002 | 12 | 114846399 | TBX5          | -2.622±0.334 | -1.606±0.866 | 4.76E-13 |
| cg26832211 | 11 | 71259251  | KRTAP5-9      | 1.933±0.317  | 2.612±0.558  | 4.81E-13 |
| cg10756887 | 22 | 24105692  | C22orf15      | -0.915±0.561 | -0.023±0.661 | 4.92E-13 |
| cg10840864 | 17 | 61903314  | PSMC5         | 2.039±0.298  | 2.621±0.469  | 4.96E-13 |
| cg24338843 | 1  | 12806667  | C1orf158      | 1.072±0.235  | 0.049±0.882  | 5.02E-13 |
| cg08145590 | 3  | 119422161 | MAATS1        | -2.199±0.459 | -3.164±0.791 | 5.02E-13 |
| cg07914866 | 12 | 66583431  | IRAK3         | -2.053±0.313 | -0.878±1.01  | 5.06E-13 |
| cg03835296 | 6  | 25830922  | SLC17A1       | 1.526±0.232  | 0.824±0.599  | 5.07E-13 |
| cg26548883 | 17 | 34329899  | CCL15-CCL14   | 0.925±0.348  | 0.097±0.693  | 5.10E-13 |
| cg10257049 | 5  | 154230308 | FAXDC2        | -2.539±0.5   | -1.301±1.041 | 5.19E-13 |
| cg19553463 | 18 | 51038264  | DCC           | 0.589±0.166  | 0.264±0.263  | 5.22E-13 |
| cg21608192 | 16 | 17563827  | XYLT1         | -4.041±0.465 | -2.74±1.106  | 5.32E-13 |
| cg26782833 | 2  | 128642103 | AMMECR1L      | -0.085±0.248 | 0.733±0.702  | 5.40E-13 |
| cg18145505 | 15 | 33009498  | GREM1         | -3.426±0.352 | -2.105±1.138 | 5.40E-13 |
| cg24875415 | 20 | 23669470  | CST4          | 2.473±0.264  | 1.667±0.689  | 5.41E-13 |
| cg09837648 | 3  | 48466751  | PLXNB1        | 1.52±0.304   | 2.31±0.668   | 5.42E-13 |
| cg14920334 | 12 | 4829827   | GALNT8        | -0.162±0.345 | -1.072±0.771 | 5.47E-13 |
| cg14948822 | 2  | 27545006  | MPV17         | 1.852±0.296  | 1.097±0.637  | 5.48E-13 |
| cg01545079 | 14 | 24541377  | CPNE6         | 1.766±0.255  | 0.896±0.748  | 5.49E-13 |
| cg13553455 | 10 | 105846002 | COL17A1       | 1.473±0.304  | 0.614±0.732  | 5.53E-13 |
| cg14400118 | 16 | 55513191  | MMP2          | -2.998±0.414 | -1.678±1.131 | 5.55E-13 |
| cg10003443 | 20 | 22567170  | FOXA2         | -1.678±0.296 | -0.943±0.619 | 5.59E-13 |
| cg22377389 | 13 | 20805679  | GJB6          | -1.281±0.359 | -0.132±0.985 | 5.59E-13 |
| cg18992201 | 3  | 109035381 | DPPA2         | 1.753±0.286  | 2.314±0.454  | 5.60E-13 |
| cg04514469 | 14 | 95942666  | SYNE3         | 2.012±0.314  | 0.886±0.97   | 5.66E-13 |
| cg26399035 | 16 | 20753649  | THUMPD1       | 0.755±0.23   | 0.167±0.497  | 5.75E-13 |
| cg25061755 | 2  | 48808114  | STON1-GTF2A1L | 2.287±0.28   | 1.449±0.717  | 5.76E-13 |
| cg12336540 | 1  | 167598993 | RCSN1         | -1.238±0.393 | -0.149±0.928 | 5.83E-13 |
| cg10409560 | 4  | 76481299  | C4orf26       | 2.3±0.314    | 1.313±0.847  | 5.86E-13 |
| cg15439862 | 18 | 28622593  | DSC3          | -1.913±0.406 | -0.804±0.943 | 5.86E-13 |
| cg09577651 | 20 | 1600705   | SIRPB1        | -0.126±0.24  | -1.086±0.83  | 5.94E-13 |
| cg20881054 | 14 | 77228508  | VASH1         | -4.95±0.392  | -3.129±1.578 | 5.94E-13 |
| cg12970008 | 11 | 3186095   | OSBPL5        | -3.892±0.479 | -3.116±0.585 | 5.95E-13 |
| cg16363586 | 19 | 17516329  | BST2          | 0.038±0.322  | -1.107±0.988 | 6.05E-13 |
| cg19574488 | 3  | 61236547  | FHIT          | -2.343±0.348 | -2.943±0.467 | 6.14E-13 |
| cg21296676 | 6  | 133561660 | EYA4          | -0.325±0.221 | 0.482±0.697  | 6.16E-13 |
| cg10925082 | 12 | 15114703  | ARHGDI1B      | -1.322±0.359 | -2.049±0.595 | 6.23E-13 |
| cg22862656 | 11 | 62037659  | SCGB2A2       | 2.917±0.316  | 1.573±1.166  | 6.29E-13 |

|            |    |           |           |              |              |          |
|------------|----|-----------|-----------|--------------|--------------|----------|
| cg22189286 | 12 | 119616193 | HSPB8     | 0.114±0.26   | 0.707±0.496  | 6.32E-13 |
| cg26924825 | 16 | 67977865  | LCAT      | 1.401±0.295  | 2.034±0.525  | 6.39E-13 |
| cg21044104 | 3  | 42451876  | LYZL4     | 1.496±0.277  | 0.669±0.71   | 6.40E-13 |
| cg10082841 | 9  | 130689321 | PIP5KL1   | -1.74±0.356  | -2.516±0.645 | 6.45E-13 |
| cg19132372 | 2  | 207079152 | GPR1      | 2.275±0.266  | 1.354±0.795  | 6.46E-13 |
| cg10635061 | 2  | 106055006 | FHL2      | -0.785±0.351 | -0.033±0.624 | 6.49E-13 |
| cg23620639 | 10 | 71561211  | COL13A1   | -3.305±0.359 | -3.889±0.444 | 6.53E-13 |
| cg08820801 | 19 | 39465821  | FBXO17    | -0.788±0.429 | 0.313±0.935  | 6.56E-13 |
| cg05846716 | 20 | 17208109  | PCSK2     | -4.086±0.416 | -3.036±0.89  | 6.61E-13 |
| cg23519022 | 1  | 19746204  | CAPZB     | 1.622±0.21   | 2.021±0.321  | 6.67E-13 |
| cg02331561 | 16 | 2391081   | ABCA17P   | -3.655±0.47  | -4.709±0.883 | 7.01E-13 |
| cg10997248 | 11 | 117699019 | FXYP2     | 0.841±0.188  | 0.366±0.404  | 7.08E-13 |
| cg03866607 | 17 | 59532826  | TBX4      | -0.933±0.15  | -0.313±0.539 | 7.10E-13 |
| cg08074477 | 17 | 38657949  | TNS4      | 0.464±0.163  | -0.066±0.458 | 7.12E-13 |
| cg00243313 | 5  | 1883413   | IRX4      | -4.902±0.483 | -2.806±1.823 | 7.13E-13 |
| cg01817029 | 12 | 72665510  | TRHDE     | -3.385±0.331 | -2.27±0.964  | 7.15E-13 |
| cg24800887 | 16 | 89883988  | FANCA     | 2.933±0.251  | 1.922±0.878  | 7.26E-13 |
| cg12087643 | 10 | 118033370 | GFRA1     | -3.001±0.299 | -1.991±0.874 | 7.28E-13 |
| cg01705587 | 1  | 149889364 | SV2A      | -4.686±0.495 | -2.915±1.536 | 7.28E-13 |
| cg24675098 | 5  | 35617879  | SPEF2     | -2.778±0.723 | -3.938±0.877 | 7.29E-13 |
| cg24736099 | 20 | 9077730   | PLCB4     | 1.979±0.336  | 0.957±0.872  | 7.35E-13 |
| cg21696393 | 16 | 1030401   | LMF1      | -1.555±0.246 | -0.595±0.835 | 7.44E-13 |
| cg01377755 | 1  | 147143258 | ACP6      | 0.693±0.199  | -0.004±0.604 | 7.53E-13 |
| cg17790333 | 15 | 74660265  | CYP11A1   | 1.615±0.28   | 0.968±0.545  | 7.58E-13 |
| cg08887581 | 1  | 16330716  | C1orf64   | 0.689±0.275  | 1.6±0.789    | 7.59E-13 |
| cg20786074 | 2  | 56150255  | EFEMP1    | -2.255±0.306 | -1.06±1.039  | 7.63E-13 |
| cg14920846 | 1  | 201618209 | NAV1      | 0.326±0.237  | -0.361±0.59  | 7.68E-13 |
| cg11038843 | 11 | 134281391 | B3GAT1    | -2.576±0.353 | -1.395±1.023 | 7.72E-13 |
| cg15446391 | 11 | 32452370  | WT1       | -0.811±0.346 | 0.018±0.703  | 7.78E-13 |
| cg21960882 | 16 | 32264404  | TP53TG3D  | 0.552±0.429  | 1.4±0.696    | 7.81E-13 |
| cg20520725 | 6  | 26217564  | HIST1H2AE | -3.078±0.416 | -1.573±1.308 | 7.84E-13 |
| cg18808261 | 3  | 18464935  | SATB1     | -1.216±0.247 | -0.601±0.517 | 7.86E-13 |
| cg08983760 | 13 | 78549582  | EDNRB     | 1.208±0.268  | 0.663±0.45   | 7.89E-13 |
| cg24930915 | 16 | 2199120   | RAB26     | -2.216±0.226 | -2.589±0.287 | 7.98E-13 |
| cg07915343 | 11 | 18477680  | LDHAL6A   | 0.767±0.481  | 1.425±0.436  | 8.05E-13 |
| cg16953612 | 3  | 128185690 | DNAJB8    | 1.572±0.284  | 0.86±0.607   | 8.13E-13 |
| cg21109025 | 17 | 32580869  | CCL2      | 1.344±0.27   | 0.515±0.717  | 8.35E-13 |
| cg06498267 | 5  | 45695922  | CEN1      | -2.243±0.499 | -1.087±0.978 | 8.38E-13 |
| cg23037403 | 5  | 178368183 | ZNF454    | -2.552±0.54  | -1.223±1.131 | 8.41E-13 |
| cg16112050 | 18 | 713200    | ENOSF1    | 2.269±0.58   | 1.054±1.011  | 8.46E-13 |
| cg12277666 | 1  | 179560870 | TDRD5     | -2.53±0.683  | -1.109±1.18  | 8.52E-13 |
| cg23110514 | 1  | 152538888 | LCE3E     | 0.653±0.308  | -0.462±0.971 | 8.57E-13 |
| cg04863713 | 1  | 150521201 | ADAMTSL4  | -3.15±0.225  | -3.773±0.536 | 8.57E-13 |
| cg19135761 | 1  | 3567214   | WRAP73    | -1.947±0.33  | -1.163±0.666 | 8.63E-13 |
| cg14201617 | 2  | 47382452  | C2orf61   | 2.168±0.455  | 2.88±0.534   | 8.74E-13 |
| cg03952109 | 5  | 93409932  | FAM172A   | 0.444±0.314  | 0.951±0.38   | 8.76E-13 |
| cg25094569 | 11 | 32448769  | WT1       | -3.382±0.475 | -1.914±1.272 | 8.78E-13 |
| cg08623787 | 1  | 165414611 | RXRG      | -2.717±0.374 | -1.765±0.814 | 8.79E-13 |
| cg05254747 | 8  | 22223937  | SLC39A14  | 1.507±0.24   | 2.105±0.51   | 8.82E-13 |
| cg02288165 | 20 | 3687992   | SIGLEC1   | -0.565±0.262 | -1.149±0.491 | 8.84E-13 |
| cg25839766 | 19 | 43385077  | PSG1      | 1.66±0.22    | 0.766±0.782  | 8.86E-13 |
| cg24929834 | 22 | 29457241  | C22orf31  | 0.462±0.27   | 1.178±0.615  | 8.98E-13 |
| cg16739580 | 3  | 191179074 | PYDC2     | 1.44±0.295   | 0.39±0.915   | 8.98E-13 |
| cg25764191 | 10 | 105037215 | INA       | -4.13±0.541  | -1.891±1.959 | 8.98E-13 |
| cg15784332 | 19 | 18902172  | COMP      | -3.352±0.509 | -1.937±1.22  | 8.98E-13 |
| cg03963198 | 5  | 1882871   | IRX4      | -2.672±0.655 | -1.112±1.326 | 9.07E-13 |
| cg01722994 | 16 | 10277317  | GRIN2A    | -4.617±0.473 | -3.033±1.379 | 9.08E-13 |
| cg26189983 | 1  | 12227700  | TNFRSF1B  | -3.826±0.569 | -1.915±1.664 | 9.10E-13 |
| cg27496506 | 15 | 43559170  | TGM5      | 1.385±0.194  | 0.568±0.716  | 9.13E-13 |
| cg12300353 | 4  | 44450358  | KCTD8     | -3.674±0.662 | -2.303±1.141 | 9.17E-13 |
| cg08045570 | 6  | 1390502   | FOXF2     | -4.993±0.989 | -3.27±1.367  | 9.25E-13 |
| cg01234133 | 17 | 48279072  | COL1A1    | -2.682±0.345 | -1.21±1.29   | 9.27E-13 |
| cg01775265 | 20 | 31780882  | BPIFA4P   | -0.714±0.284 | 0.027±0.636  | 9.29E-13 |
| cg01861509 | 10 | 73849626  | SPOCK2    | 1.186±0.35   | 1.772±0.457  | 9.29E-13 |
| cg15791248 | 8  | 38326730  | FGFR1     | 0.81±0.176   | 1.329±0.45   | 9.51E-13 |
| cg20059151 | 1  | 95286311  | SLC44A3   | -1.629±0.229 | -2.17±0.46   | 9.58E-13 |
| cg03506489 | 11 | 30038788  | KCNA4     | -3.221±0.516 | -2.1±0.942   | 9.62E-13 |
| cg08668790 | 19 | 58220662  | ZNF154    | -3.584±0.524 | -1.648±1.693 | 9.66E-13 |
| cg00062776 | 19 | 49402424  | TULP2     | 5.116±0.413  | 3.033±1.831  | 9.81E-13 |
| cg09936839 | 19 | 4181854   | SIRT6     | 1.221±0.244  | 0.471±0.651  | 9.98E-13 |

|            |    |           |            |              |              |          |
|------------|----|-----------|------------|--------------|--------------|----------|
| cg04052038 | 21 | 31588123  | CLDN8      | 2.108±0.434  | 0.812±1.125  | 1.00E-12 |
| cg25781202 | 8  | 33424350  | RNF122     | -5.387±0.475 | -4.598±0.615 | 1.01E-12 |
| cg24887211 | 14 | 77292625  | C14orf166B | 1.563±0.267  | 0.796±0.664  | 1.02E-12 |
| cg06256735 | 12 | 8815894   | MFAP5      | 0.768±0.329  | -0.23±0.868  | 1.03E-12 |
| cg10467098 | 11 | 65687892  | DRAP1      | -1.615±0.3   | -0.963±0.549 | 1.03E-12 |
| cg26900154 | 2  | 26781731  | OTOF       | -0.264±0.268 | 0.521±0.681  | 1.05E-12 |
| cg13634319 | 12 | 56323727  | DGKA       | 0.347±0.353  | -0.653±0.866 | 1.06E-12 |
| cg27600794 | 10 | 118349430 | PNLIPRP1   | 1.085±0.319  | 0.091±0.866  | 1.07E-12 |
| cg13998293 | 1  | 26394435  | TRIM63     | 0.317±0.293  | -0.432±0.644 | 1.09E-12 |
| cg01593385 | 4  | 155534149 | FGG        | 0.077±0.238  | -0.515±0.508 | 1.09E-12 |
| cg00705255 | 19 | 54804613  | LILRA3     | -1.159±0.303 | -1.796±0.535 | 1.11E-12 |
| cg06914598 | 7  | 5085121   | RBAK       | -1.071±0.239 | -0.378±0.603 | 1.11E-12 |
| cg13958614 | 5  | 72744196  | FOXD1      | -1.996±0.421 | -0.595±1.226 | 1.12E-12 |
| cg18221862 | 2  | 193059230 | TMEFF2     | -3.577±0.31  | -2.349±1.08  | 1.12E-12 |
| cg17183546 | 4  | 4387879   | NSG1       | -3.606±0.376 | -2.351±1.098 | 1.13E-12 |
| cg05046097 | 10 | 88717926  | SNCG       | 0.4±0.163    | 0.813±0.355  | 1.14E-12 |
| cg04945541 | 17 | 43299826  | FMNL1      | -2.323±0.34  | -1.021±1.144 | 1.14E-12 |
| cg21922574 | 18 | 70535925  | NETO1      | -5.4±0.559   | -3.826±1.367 | 1.14E-12 |
| cg01169778 | 9  | 136038690 | GBGT1      | 0.941±0.373  | 1.696±0.629  | 1.15E-12 |
| cg20721467 | 10 | 76597927  | KAT6B      | 0.909±0.258  | 1.331±0.328  | 1.15E-12 |
| cg01835489 | 12 | 53299310  | KRT8       | 0.72±0.263   | -0.176±0.786 | 1.18E-12 |
| cg04969878 | 12 | 72079240  | TMEM19     | 0.049±0.255  | -0.625±0.583 | 1.18E-12 |
| cg27519140 | 6  | 30312645  | RPP21      | 1.525±0.236  | 0.578±0.834  | 1.18E-12 |
| cg10741760 | 1  | 19992024  | HTR6       | -3.037±0.418 | -1.739±1.134 | 1.19E-12 |
| cg09453312 | 5  | 156608118 | ITK        | 0.875±0.317  | -0.117±0.867 | 1.19E-12 |
| cg22901840 | 1  | 68512777  | DIRAS3     | 0.852±0.231  | 1.472±0.537  | 1.20E-12 |
| cg18294158 | 7  | 103849187 | ORC5       | 0.834±0.355  | -0.062±0.772 | 1.20E-12 |
| cg24276491 | 14 | 35009492  | EAPP       | 1.563±0.283  | 0.661±0.789  | 1.21E-12 |
| cg04922810 | 7  | 30721888  | CRHR2      | -3.614±0.341 | -2.572±0.91  | 1.21E-12 |
| cg03803009 | 17 | 72363634  | GPR142     | 1.733±0.188  | 0.948±0.692  | 1.21E-12 |
| cg21995126 | 3  | 165555262 | BCHE       | -0.846±0.262 | 0.069±0.796  | 1.22E-12 |
| cg00263760 | 10 | 118897366 | VAX1       | -3.321±0.468 | -1.984±1.164 | 1.22E-12 |
| cg10052840 | 19 | 4558119   | SEMA6B     | 0.253±0.228  | -0.293±0.469 | 1.23E-12 |
| cg17894008 | 17 | 59668604  | NACA2      | 3.198±0.347  | 2.167±0.9    | 1.23E-12 |
| cg20925954 | 10 | 112256640 | DUSP5      | -0.607±0.199 | 0.07±0.595   | 1.26E-12 |
| cg16519321 | 11 | 17741243  | MYOD1      | -2.724±0.47  | -1.82±0.747  | 1.26E-12 |
| cg03453449 | 12 | 95945120  | USP44      | 1.265±0.262  | 1.765±0.412  | 1.26E-12 |
| cg20092036 | 12 | 109914141 | KCTD10     | -1.094±0.368 | -0.277±0.694 | 1.27E-12 |
| cg17471928 | 17 | 37381830  | STAC2      | -3.957±0.363 | -2.457±1.325 | 1.28E-12 |
| cg23502772 | 5  | 43191975  | NIM1       | -4.175±0.33  | -2.728±1.28  | 1.28E-12 |
| cg04273431 | 6  | 30523215  | PRR3       | -1.004±0.294 | -0.032±0.854 | 1.29E-12 |
| cg18732541 | 19 | 7741602   | C19orf59   | -1.146±0.348 | -1.929±0.667 | 1.29E-12 |
| cg20011352 | 8  | 37655269  | GPR124     | -3.547±0.452 | -2.234±1.146 | 1.29E-12 |
| cg20247048 | 17 | 62972358  | AMZ2P1     | -3.014±0.315 | -3.734±0.615 | 1.31E-12 |
| cg25524473 | 10 | 112258394 | DUSP5      | -2.337±0.287 | -3.126±0.687 | 1.31E-12 |
| cg24775607 | 16 | 1129057   | SSTR5      | 4.28±0.545   | 2.517±1.548  | 1.32E-12 |
| cg25007250 | 7  | 150687712 | NOS3       | 3.527±0.445  | 2.179±1.181  | 1.32E-12 |
| cg12311132 | 11 | 32112154  | RCN1       | -2.045±0.32  | -1.416±0.523 | 1.35E-12 |
| cg06493386 | 8  | 72987797  | TRPA1      | -2.484±0.282 | -1.242±1.1   | 1.35E-12 |
| cg20387341 | 5  | 44389282  | FGF10      | -3.02±0.344  | -1.966±0.924 | 1.36E-12 |
| cg15722679 | 20 | 1638393   | SIRPG      | -0.799±0.398 | -1.558±0.628 | 1.37E-12 |
| cg25423576 | 6  | 117197952 | RFX6       | -4.035±0.503 | -2.933±0.936 | 1.38E-12 |
| cg02205739 | 9  | 132427570 | PRRX2      | -5.102±0.39  | -3.651±1.282 | 1.40E-12 |
| cg25889160 | 14 | 95046342  | SERPINA5   | 2.819±0.221  | 1.672±1.019  | 1.40E-12 |
| cg03960217 | 1  | 152647777 | LCE2C      | -0.44±0.2    | -1.401±0.852 | 1.40E-12 |
| cg03555203 | 19 | 31770188  | TSHZ3      | 4.435±0.281  | 3.598±0.733  | 1.42E-12 |
| cg24109894 | 1  | 36108212  | PSMB2      | -0.118±0.316 | -0.675±0.449 | 1.42E-12 |
| cg05998983 | 10 | 74653449  | OIT3       | -0.032±0.3   | 0.571±0.499  | 1.43E-12 |
| cg01794265 | 5  | 14582549  | FAM105A    | -4.447±0.427 | -5.144±0.545 | 1.44E-12 |
| cg23058901 | 11 | 44324759  | ALX4       | -0.355±0.226 | 0.274±0.549  | 1.44E-12 |
| cg09188980 | 11 | 14993378  | CALCA      | -2.709±0.529 | -1.651±0.886 | 1.44E-12 |
| cg09440243 | 9  | 9019757   | PTPRD      | 2.26±0.288   | 1.167±0.967  | 1.45E-12 |
| cg17251713 | 18 | 61443038  | SERPINB7   | -0.871±0.257 | -1.848±0.864 | 1.47E-12 |
| cg14069619 | 17 | 8275273   | KRBA2      | 0.293±0.353  | 0.915±0.501  | 1.47E-12 |
| cg10331779 | 5  | 11904811  | CTNND2     | -2.412±0.3   | -1.346±0.942 | 1.47E-12 |
| cg01610488 | 8  | 72987870  | TRPA1      | -3.789±0.493 | -2.237±1.366 | 1.48E-12 |
| cg08782122 | 7  | 153110994 | 0          | 4.663±0.336  | 3.708±0.836  | 1.51E-12 |
| cg18766755 | 1  | 153029939 | SPRR2A     | 1.17±0.319   | 0.139±0.9    | 1.54E-12 |
| cg21271753 | 22 | 37499451  | TMPRSS6    | -0.648±0.308 | 0.305±0.839  | 1.54E-12 |
| cg19910382 | 2  | 88427561  | FABP1      | 1.62±0.304   | 2.388±0.667  | 1.57E-12 |

|            |    |           |           |              |              |          |
|------------|----|-----------|-----------|--------------|--------------|----------|
| cg01550148 | 5  | 134735544 | H2AFY     | 0.392±0.209  | 1.014±0.548  | 1.59E-12 |
| cg26918645 | 19 | 44905882  | ZNF285    | -4.089±0.431 | -2.689±1.235 | 1.59E-12 |
| cg23767977 | 12 | 52947465  | KRT71     | 2.929±0.363  | 2.133±0.68   | 1.61E-12 |
| cg13447818 | 1  | 152298884 | FLG       | 1.96±0.29    | 0.861±0.975  | 1.61E-12 |
| cg18338311 | 17 | 32907939  | TMEM132E  | -3.175±0.397 | -2.015±1.02  | 1.62E-12 |
| cg26940261 | 12 | 105725112 | C12orf75  | -2.141±0.262 | -2.979±0.739 | 1.62E-12 |
| cg10646402 | 12 | 15475490  | PTPRO     | -4.505±0.593 | -2.923±1.382 | 1.65E-12 |
| cg03292149 | 19 | 45279765  | CBLC      | 1.565±0.321  | 0.612±0.839  | 1.67E-12 |
| cg24408313 | 18 | 60988465  | 0         | -0.237±0.22  | -0.861±0.548 | 1.67E-12 |
| cg20556988 | 17 | 32690127  | CCL1      | 2.32±0.216   | 1.423±0.798  | 1.69E-12 |
| cg24824840 | 19 | 51219975  | SHANK1    | 2.05±0.291   | 1.09±0.849   | 1.70E-12 |
| cg15642035 | 8  | 139165052 | FAM135B   | 1.448±0.324  | 0.28±1.037   | 1.70E-12 |
| cg03238797 | 16 | 77468893  | ADAMTS18  | -4.392±0.61  | -2.766±1.422 | 1.71E-12 |
| cg17029168 | 20 | 21494547  | NKX2-2    | -2.96±0.317  | -1.572±1.236 | 1.71E-12 |
| cg07629017 | 8  | 53851613  | NPBWR1    | -3.999±0.369 | -2.918±0.951 | 1.71E-12 |
| cg04527363 | 3  | 6902337   | GRM7      | -3.222±0.316 | -2.274±0.836 | 1.74E-12 |
| cg24311282 | 19 | 50464887  | SIGLEC11  | 2.719±0.237  | 1.927±0.702  | 1.78E-12 |
| cg08558340 | 7  | 100472263 | SRRT      | -1.309±0.317 | -0.348±0.848 | 1.82E-12 |
| cg09542111 | 21 | 31312091  | GRIK1     | -4.081±0.393 | -2.764±1.168 | 1.83E-12 |
| cg03593419 | 4  | 46995474  | GABRA4    | -4.41±0.561  | -3.125±1.108 | 1.87E-12 |
| cg13798289 | 16 | 67875619  | THAP11    | 0.153±0.201  | -0.432±0.517 | 1.89E-12 |
| cg19264571 | 18 | 10454085  | APCDD1    | 0.107±0.262  | 0.912±0.712  | 1.92E-12 |
| cg15928398 | 3  | 186647950 | ST6GAL1   | -2.451±0.892 | -0.835±1.329 | 1.92E-12 |
| cg20723355 | 17 | 6679597   | FBXO39    | -2.518±0.56  | -0.948±1.382 | 1.92E-12 |
| cg01493517 | 12 | 6665447   | IFFO1     | -0.623±0.299 | 0.328±0.843  | 1.92E-12 |
| cg27114120 | 20 | 5296302   | PROKR2    | -2.813±0.416 | -1.716±0.962 | 1.96E-12 |
| cg13170032 | 1  | 221052143 | HLX       | -3.664±0.553 | -2.419±1.073 | 1.96E-12 |
| cg01853981 | 12 | 52946482  | KRT71     | 3.567±0.33   | 2.763±0.7    | 1.99E-12 |
| cg22349489 | 6  | 27114943  | HIST1H2AH | -3.996±0.877 | -5.076±0.622 | 2.05E-12 |
| cg11151665 | 19 | 43421584  | PSG6      | 2.168±0.292  | 1.387±0.687  | 2.08E-12 |
| cg06697251 | 19 | 6501613   | TUBB4A    | -0.407±0.3   | 0.295±0.609  | 2.08E-12 |
| cg03469054 | 12 | 130387861 | TMEM132D  | -3.304±0.554 | -2.069±1.066 | 2.11E-12 |
| cg09096031 | 2  | 198540569 | RFTN2     | -0.788±0.366 | -0.031±0.645 | 2.14E-12 |
| cg10994126 | 1  | 176432498 | PAPPA2    | -0.018±0.231 | -0.888±0.777 | 2.15E-12 |
| cg19282250 | 9  | 79328522  | PRUNE2    | -0.047±0.318 | 0.828±0.771  | 2.15E-12 |
| cg20491707 | 10 | 47083283  | NPY4R     | -0.925±0.247 | -0.004±0.823 | 2.20E-12 |
| cg22335801 | 1  | 1149091   | TNFRSF4   | -1.315±0.271 | -2.138±0.731 | 2.21E-12 |
| cg02388150 | 8  | 41165699  | SFRP1     | -2.321±0.311 | -1.361±0.853 | 2.22E-12 |
| cg03317245 | 17 | 3600514   | P2RX5     | 0.76±0.236   | 1.291±0.46   | 2.25E-12 |
| cg01405107 | 17 | 46671635  | HOXB5     | -2.461±0.455 | -1.352±0.969 | 2.26E-12 |
| cg14436761 | 17 | 40912963  | RAMP2     | -4.019±0.371 | -3.142±0.764 | 2.26E-12 |
| cg11435943 | 18 | 61222687  | SERPINB12 | 1.161±0.249  | 0.14±0.915   | 2.26E-12 |
| cg03842617 | 7  | 150688556 | NOS3      | 2.785±0.394  | 1.932±0.734  | 2.26E-12 |
| cg06494782 | 12 | 52995446  | KRT72     | -0.302±0.271 | 0.355±0.573  | 2.28E-12 |
| cg26233914 | 16 | 31366536  | ITGAX     | -2.24±0.341  | -2.969±0.626 | 2.29E-12 |
| cg18450227 | 18 | 48190637  | MAPK4     | 4.561±0.43   | 3.441±0.986  | 2.30E-12 |
| cg20648149 | 14 | 64319089  | SYNE2     | 0.745±0.31   | -0.225±0.863 | 2.32E-12 |
| cg12783776 | 11 | 57365948  | SERPING1  | -3.717±0.424 | -2.731±0.858 | 2.32E-12 |
| cg18349835 | 7  | 158937107 | VIPR2     | -5.317±0.862 | -3.056±1.991 | 2.35E-12 |
| cg09971646 | 14 | 101194145 | DLK1      | -1.262±0.33  | -0.238±0.912 | 2.35E-12 |
| cg10059959 | 9  | 37035381  | PAX5      | -3.474±0.296 | -2.185±1.158 | 2.35E-12 |
| cg03716937 | 8  | 39695862  | ADAM2     | 2.586±0.246  | 2.001±0.511  | 2.37E-12 |
| cg11249173 | 6  | 11112209  | ERVFRD-1  | 0.121±0.153  | 0.428±0.261  | 2.38E-12 |
| cg03673470 | 1  | 238055429 | ZP4       | 2.189±0.281  | 1.278±0.813  | 2.42E-12 |
| cg08399444 | 12 | 13248548  | GSG1      | 1.322±0.337  | 1.943±0.517  | 2.44E-12 |
| cg14967066 | 11 | 314341    | IFITM1    | -1.699±0.385 | -2.576±0.762 | 2.45E-12 |
| cg25076881 | 1  | 159409836 | OR10J1    | -0.71±0.267  | -1.633±0.826 | 2.45E-12 |
| cg02939139 | 12 | 113574204 | RASAL1    | -0.843±0.361 | -1.552±0.6   | 2.49E-12 |
| cg13406768 | 2  | 228192416 | MFF       | 1.396±0.318  | 1.949±0.448  | 2.57E-12 |
| cg17105014 | 2  | 127413363 | GYPC      | -2.431±0.362 | -1.397±0.919 | 2.57E-12 |
| cg26164310 | 1  | 99729780  | LPPR4     | -3.53±0.443  | -2.225±1.162 | 2.64E-12 |
| cg08649013 | 4  | 10042198  | SLC2A9    | 2.285±0.299  | 1.438±0.753  | 2.66E-12 |
| cg26615126 | 2  | 3642867   | COLEC11   | 0.494±0.242  | 1.107±0.541  | 2.69E-12 |
| cg23242898 | 18 | 49867273  | DCC       | -3.042±0.607 | -1.797±1.066 | 2.69E-12 |
| cg06616245 | 12 | 57854236  | GLI1      | -2.439±0.34  | -2.938±0.371 | 2.73E-12 |
| cg16504670 | 16 | 90014253  | DEF8      | 1.89±0.295   | 1.092±0.708  | 2.74E-12 |
| cg24650501 | 1  | 165324990 | LMX1A     | -3.409±0.344 | -2.257±1.034 | 2.75E-12 |
| cg22927134 | 15 | 34349252  | CHRM5     | 1.355±0.318  | 0.484±0.773  | 2.77E-12 |
| cg24546942 | 18 | 61310626  | SERPINB4  | 1.549±0.202  | 0.743±0.726  | 2.79E-12 |
| cg12554857 | 4  | 95264019  | HPGDS     | 0.218±0.322  | 0.945±0.633  | 2.84E-12 |

|            |    |           |             |              |              |          |
|------------|----|-----------|-------------|--------------|--------------|----------|
| cg23743472 | 11 | 125649234 | PATE2       | 2.336±0.284  | 1.163±1.059  | 2.85E-12 |
| cg22642718 | 17 | 21318837  | KCNJ18      | 4.063±0.416  | 3.124±0.819  | 2.86E-12 |
| cg16158874 | 19 | 46095562  | GPR4        | 1.067±0.202  | 0.543±0.464  | 2.90E-12 |
| cg12893143 | 5  | 176237996 | UNC5A       | -4.213±0.578 | -2.649±1.389 | 2.92E-12 |
| cg16517394 | 1  | 173176362 | TNFSF4      | -1.244±0.366 | -0.132±0.996 | 2.94E-12 |
| cg01906717 | 9  | 21368203  | IFNA13      | 1.51±0.359   | 0.907±0.485  | 2.94E-12 |
| cg19302283 | 4  | 75720398  | BTC         | 2.358±0.293  | 1.683±0.59   | 2.95E-12 |
| cg18636641 | 9  | 134165268 | PPAPDC3     | 1.134±0.284  | 1.616±0.393  | 3.05E-12 |
| cg25729068 | 14 | 92303235  | TC2N        | -4.081±0.459 | -4.679±0.397 | 3.05E-12 |
| cg22578204 | 22 | 33197952  | TIMP3       | -3.188±0.759 | -2.029±0.899 | 3.10E-12 |
| cg21458907 | 3  | 62860802  | CADPS       | -4.012±0.602 | -2.595±1.245 | 3.12E-12 |
| cg12864235 | 5  | 27038782  | CDH9        | -1.595±0.433 | -0.262±1.195 | 3.13E-12 |
| cg18159180 | 6  | 43022213  | CUL7        | 0.05±0.349   | 0.952±0.8    | 3.17E-12 |
| cg13519373 | 2  | 219030898 | CXCR1       | 0.374±0.317  | -0.582±0.857 | 3.17E-12 |
| cg11206634 | 2  | 128458399 | SFT2D3      | 1.08±0.24    | 0.019±0.962  | 3.18E-12 |
| cg23273897 | 3  | 154796861 | MME         | -2.63±0.233  | -1.592±0.941 | 3.19E-12 |
| cg11873854 | 9  | 139642875 | LCN6        | -0.016±0.298 | -0.511±0.402 | 3.19E-12 |
| cg07558455 | 1  | 62784762  | KANK4       | -4.168±0.797 | -2.651±1.285 | 3.20E-12 |
| cg13589108 | 1  | 177140680 | FAM5B       | -4.538±0.459 | -3.068±1.321 | 3.20E-12 |
| cg12629515 | 6  | 27859811  | HIST1H3J    | -0.516±0.216 | -1.448±0.845 | 3.23E-12 |
| cg18841634 | 18 | 49868236  | DCC         | -4.202±0.365 | -2.996±1.086 | 3.25E-12 |
| cg11261264 | 19 | 55720737  | PTPRH       | 2.172±0.267  | 1.262±0.821  | 3.28E-12 |
| cg09001777 | 19 | 5851504   | FUT3        | -0.474±0.214 | -1.173±0.629 | 3.30E-12 |
| cg18292394 | 10 | 82049450  | MAT1A       | -0.847±0.29  | -1.589±0.659 | 3.31E-12 |
| cg06940792 | 5  | 126626557 | MEGF10      | -4.321±0.417 | -3.047±1.144 | 3.31E-12 |
| cg26322315 | 7  | 7758995   | RPA3        | 0.861±0.317  | -0.09±0.845  | 3.32E-12 |
| cg11808874 | 2  | 70529494  | FAM136A     | 1.186±0.195  | 0.375±0.735  | 3.32E-12 |
| cg01474260 | 22 | 17073884  | CCT8L2      | 0.828±0.272  | -0.094±0.831 | 3.32E-12 |
| cg06856528 | 2  | 193059405 | TMEFF2      | -3.499±0.479 | -2.249±1.112 | 3.40E-12 |
| cg21129531 | 7  | 127670703 | LRRC4       | 1.072±0.435  | 2.13±0.936   | 3.40E-12 |
| cg22498251 | 7  | 19157710  | LRWST1      | -2.475±0.22  | -1.443±0.938 | 3.40E-12 |
| cg04322134 | 9  | 34328884  | KIF24       | -3.753±0.542 | -4.573±0.635 | 3.55E-12 |
| cg11631518 | 12 | 75603585  | KCNC2       | -3.436±0.418 | -2.319±0.998 | 3.61E-12 |
| cg05181279 | 11 | 11982794  | 0           | 1.987±0.31   | 1.143±0.754  | 3.61E-12 |
| cg15626350 | 6  | 152130207 | ESR1        | -1.225±0.463 | -0.223±0.875 | 3.62E-12 |
| cg09120035 | 8  | 143961145 | CYP11B1     | 2.208±0.256  | 1.19±0.925   | 3.64E-12 |
| cg05589246 | 12 | 54348719  | HOXC12      | -3.02±0.333  | -1.925±0.989 | 3.65E-12 |
| cg15261665 | 3  | 46506374  | LTF         | -0.705±0.25  | -1.577±0.789 | 3.74E-12 |
| cg24641352 | 8  | 144328078 | ZFP41       | -0.439±0.274 | 0.445±0.798  | 3.76E-12 |
| cg07360692 | 4  | 106066952 | TET2        | -1.311±0.4   | -2.069±0.644 | 3.76E-12 |
| cg01684579 | 5  | 175816834 | NOP16       | -0.616±0.265 | -1.115±0.419 | 3.81E-12 |
| cg00350296 | 11 | 66084841  | CD248       | -1.993±0.282 | -0.993±0.907 | 3.85E-12 |
| cg08422599 | 5  | 169931092 | KCNIP1      | -3.558±0.464 | -2.382±1.048 | 3.87E-12 |
| cg14120436 | 15 | 52483498  | GNB5        | 0.192±0.273  | 0.733±0.465  | 3.87E-12 |
| cg11234457 | 5  | 121187547 | FTMT        | 4.117±0.388  | 3.018±0.986  | 3.88E-12 |
| cg14435807 | 15 | 74218780  | LOXL1       | -1.386±0.453 | -0.542±0.714 | 3.88E-12 |
| cg25604883 | 1  | 77747387  | AK5         | -4.107±0.51  | -2.632±1.326 | 3.88E-12 |
| cg08005849 | 7  | 81399399  | HGF         | -1.586±0.357 | -0.474±1.004 | 3.90E-12 |
| cg13322449 | 19 | 42300200  | CEACAM3     | 0.873±0.303  | 1.349±0.378  | 3.92E-12 |
| cg04541293 | 20 | 41819125  | PTPRT       | -2.638±0.288 | -1.904±0.655 | 3.95E-12 |
| cg14289985 | 19 | 57018848  | ZNF471      | -3.779±0.667 | -2.237±1.361 | 3.99E-12 |
| cg21870884 | 1  | 200842429 | GPR25       | -0.832±0.42  | 0.055±0.773  | 4.00E-12 |
| cg22843446 | 11 | 123066252 | CLMP        | -4.687±0.486 | -3.874±0.666 | 4.05E-12 |
| cg02194878 | 1  | 22890278  | EPHA8       | -3.272±0.685 | -2.054±1.02  | 4.05E-12 |
| cg01402255 | 1  | 153800699 | GATAD2B     | -0.525±0.268 | 0.1±0.553    | 4.13E-12 |
| cg18454685 | 17 | 48639239  | CACNA1G-AS1 | -3.235±0.593 | -1.879±1.197 | 4.16E-12 |
| cg01086895 | 11 | 6676515   | DCHS1       | -3.277±0.53  | -1.936±1.197 | 4.18E-12 |
| cg14681767 | 8  | 1772393   | ARHGEF10    | -4.392±0.562 | -3.404±0.826 | 4.18E-12 |
| cg24719601 | 4  | 41750466  | PHOX2B      | -3.46±0.316  | -2.161±1.185 | 4.21E-12 |
| cg20059312 | 2  | 233877857 | NGEF        | 3.808±0.247  | 3.089±0.648  | 4.24E-12 |
| cg22979433 | 5  | 80528609  | CKMT2       | 0.564±0.203  | 1.103±0.483  | 4.28E-12 |
| cg09730349 | 14 | 90420579  | EFCAB11     | -1.419±0.252 | -0.362±0.964 | 4.29E-12 |
| cg06291867 | 10 | 92617162  | HTR7        | -2.486±0.423 | -1.288±1.078 | 4.32E-12 |
| cg19280968 | 3  | 195270614 | PPP1R2      | -2.209±0.342 | -2.772±0.459 | 4.32E-12 |
| cg17256157 | 6  | 142410100 | NMBR        | -3.938±0.334 | -2.736±1.094 | 4.38E-12 |
| cg09244244 | 5  | 94891907  | ARSK        | -2.869±0.354 | -2.197±0.575 | 4.44E-12 |
| cg25944100 | 11 | 59824260  | MS4A3       | -0.136±0.391 | -1.122±0.882 | 4.49E-12 |
| cg08911391 | 1  | 20988590  | DDOST       | -1.197±0.265 | -1.902±0.633 | 4.49E-12 |
| cg07824742 | 9  | 136501784 | DBH         | 6.022±0.406  | 4.558±1.334  | 4.52E-12 |
| cg04747322 | 5  | 121647308 | SNCAIP      | -2.191±0.326 | -1.048±1.041 | 4.52E-12 |

|            |    |           |           |              |              |          |
|------------|----|-----------|-----------|--------------|--------------|----------|
| cg04747619 | 8  | 6914838   | DEFA5     | -0.345±0.237 | -0.999±0.589 | 4.53E-12 |
| cg11154879 | 20 | 61001775  | RBBP8NL   | 1.166±0.214  | 0.506±0.598  | 4.57E-12 |
| cg06536578 | 14 | 24048555  | JPH4      | 0.733±0.271  | 1.632±0.819  | 4.84E-12 |
| cg16977035 | 11 | 44330474  | ALX4      | 0.429±0.244  | 1.149±0.652  | 4.87E-12 |
| cg09583599 | 6  | 31925920  | SKIV2L    | 2.531±0.205  | 2.909±0.322  | 4.88E-12 |
| cg16483466 | 20 | 31671234  | BPIFB4    | 1.48±0.323   | 0.72±0.676   | 4.96E-12 |
| cg04645174 | 19 | 14993513  | OR7A17    | 1.77±0.295   | 0.974±0.71   | 4.98E-12 |
| cg12228229 | 17 | 7122261   | ACADVL    | 1.45±0.246   | 1.85±0.327   | 5.00E-12 |
| cg13152535 | 19 | 51226557  | CLEC11A   | -2.018±0.335 | -1.355±0.574 | 5.01E-12 |
| cg03294619 | 5  | 172661803 | NKX2-5    | -5.038±0.532 | -3.734±1.166 | 5.05E-12 |
| cg07671949 | 6  | 152128338 | ESR1      | -2.555±0.324 | -1.325±1.127 | 5.25E-12 |
| cg08023751 | 2  | 112655112 | MERTK     | 1.471±0.328  | 2.134±0.577  | 5.29E-12 |
| cg03565081 | 14 | 23478970  | C14orf93  | -0.151±0.248 | -1.048±0.822 | 5.34E-12 |
| cg05062178 | 3  | 124605247 | ITGB5     | -2.116±0.562 | -2.918±0.605 | 5.40E-12 |
| cg18403361 | 14 | 38725750  | CLEC14A   | -1.186±0.39  | 0.271±1.335  | 5.43E-12 |
| cg24217877 | 16 | 49378579  | 0         | 1.11±0.244   | 0.347±0.695  | 5.47E-12 |
| cg21942082 | 5  | 80690225  | ACOT12    | -4.58±0.426  | -3.336±1.131 | 5.47E-12 |
| cg25288155 | 11 | 73357396  | PLEKHB1   | -0.302±0.216 | 0.336±0.58   | 5.54E-12 |
| cg00834796 | 5  | 147161924 | JAKMIP2   | -3.126±0.342 | -2.05±0.982  | 5.55E-12 |
| cg26256793 | 1  | 103574469 | COL11A1   | -3.096±0.475 | -2.132±0.843 | 5.63E-12 |
| cg16543027 | 15 | 40599680  | PLCB2     | 0.177±0.263  | -0.534±0.643 | 5.69E-12 |
| cg05485060 | 9  | 111776779 | CTNNAL1   | -0.71±0.442  | 0.325±0.925  | 5.76E-12 |
| cg07580475 | 3  | 50304049  | SEMA3B    | 1.737±0.171  | 2.069±0.288  | 5.77E-12 |
| cg04878152 | 3  | 148415960 | AGTR1     | -2.388±0.43  | -1.074±1.199 | 5.87E-12 |
| cg07354440 | 1  | 161168889 | ADAMTS4   | 1.691±0.25   | 2.249±0.495  | 5.92E-12 |
| cg11612345 | 6  | 168842491 | SMOC2     | -2.24±0.361  | -1.324±0.826 | 5.93E-12 |
| cg23412850 | 12 | 93967387  | SOCS2     | -2.466±0.481 | -0.995±1.343 | 5.94E-12 |
| cg03688818 | 3  | 49711147  | APEH      | -3.886±0.517 | -4.6±0.527   | 5.96E-12 |
| cg13053396 | 12 | 7168545   | C1S       | 0.57±0.163   | 1.031±0.419  | 5.97E-12 |
| cg22040627 | 17 | 6617030   | SLC13A5   | -4.043±0.534 | -2.891±1.019 | 5.97E-12 |
| cg25028542 | 7  | 36429120  | ANLN      | -1.877±0.227 | -2.58±0.643  | 5.97E-12 |
| cg27443224 | 9  | 34710135  | CCL21     | -0.625±0.214 | 0.076±0.642  | 5.99E-12 |
| cg16495265 | 17 | 46671010  | HOXB5     | -3.673±0.336 | -2.265±1.298 | 6.02E-12 |
| cg23771661 | 19 | 17905332  | B3GNT3    | -0.103±0.291 | -0.767±0.593 | 6.06E-12 |
| cg24322623 | 11 | 17740430  | MYOD1     | -4.13±0.455  | -2.894±1.121 | 6.08E-12 |
| cg24626923 | 2  | 68873205  | PROKR1    | 3.57±0.231   | 2.776±0.729  | 6.17E-12 |
| cg12388309 | 20 | 9819805   | PAK7      | -4.124±0.594 | -2.562±1.413 | 6.17E-12 |
| cg14074117 | 16 | 1909714   | MEIOB     | -0.463±0.295 | -1.271±0.733 | 6.20E-12 |
| cg08816023 | 5  | 142065539 | FGF1      | 1.142±0.206  | 0.499±0.588  | 6.21E-12 |
| cg20804821 | 3  | 51988454  | GPR62     | 0.434±0.349  | -0.277±0.624 | 6.24E-12 |
| cg22858308 | 6  | 143095613 | HIVEP2    | 3.231±0.424  | 2.56±0.544   | 6.27E-12 |
| cg21631409 | 11 | 67449882  | ALDH3B2   | -0.309±0.199 | -0.794±0.436 | 6.32E-12 |
| cg08141873 | 11 | 534632    | HRAS      | -2.352±0.333 | -3.336±0.898 | 6.41E-12 |
| cg08097882 | 13 | 79177516  | POU4F1    | -4.044±0.539 | -1.995±1.888 | 6.46E-12 |
| cg14541950 | 1  | 228645704 | HIST3H2BB | -5.416±0.619 | -3.328±1.918 | 6.49E-12 |
| cg00204262 | 19 | 39323158  | ECH1      | 1.636±0.295  | 0.826±0.736  | 6.49E-12 |
| cg22136365 | 16 | 71611043  | TAT       | -1.427±0.286 | -0.533±0.819 | 6.49E-12 |
| cg20795913 | 17 | 40718830  | MLX       | -0.248±0.174 | 0.272±0.475  | 6.50E-12 |
| cg23898073 | 10 | 118032948 | GFRA1     | -4.377±0.505 | -3.056±1.197 | 6.50E-12 |
| cg07028533 | 7  | 145813439 | CNTNAP2   | -3.241±0.428 | -1.844±1.283 | 6.69E-12 |
| cg12937434 | 17 | 56405948  | BZRAP1    | -1.802±0.335 | -0.789±0.928 | 6.78E-12 |
| cg14035045 | 3  | 50606289  | HEMK1     | -1.015±0.183 | -1.568±0.506 | 6.80E-12 |
| cg20587394 | 12 | 54332209  | HOXC13    | -3.729±0.433 | -2.513±1.109 | 6.85E-12 |
| cg20162146 | 22 | 35795394  | MCM5      | 2.338±0.34   | 1.246±1.003  | 6.85E-12 |
| cg26125600 | 4  | 74718978  | PF4V1     | -0.487±0.265 | 0.125±0.549  | 6.94E-12 |
| cg14269477 | 7  | 142630597 | TRPV5     | 1.662±0.207  | 0.894±0.709  | 6.96E-12 |
| cg11484872 | 6  | 31543169  | TNF       | 0.666±0.298  | -0.079±0.673 | 7.02E-12 |
| cg26174752 | 6  | 97285948  | GPR63     | -2.636±0.345 | -1.588±0.961 | 7.07E-12 |
| cg12019109 | 7  | 99574383  | AZGP1     | 1.511±0.279  | 0.4±1.027    | 7.12E-12 |
| cg20887241 | 1  | 23522636  | HTR1D     | 1.22±0.322   | 0.542±0.6    | 7.16E-12 |
| cg15149098 | 19 | 49055027  | SULT2B1   | 1.612±0.229  | 0.85±0.702   | 7.16E-12 |
| cg13191049 | 15 | 99645663  | SYNM      | -3.219±0.681 | -1.712±1.346 | 7.30E-12 |
| cg16418329 | 4  | 71200751  | CABS1     | 1.981±0.22   | 1.218±0.704  | 7.32E-12 |
| cg14818279 | 5  | 148442554 | SH3TC2    | 1.865±0.338  | 2.292±0.286  | 7.40E-12 |
| cg05250458 | 19 | 9473565   | ZNF177    | -1.613±0.314 | -0.615±0.918 | 7.48E-12 |
| cg05404787 | 2  | 10281526  | C2orf48   | 3.043±0.301  | 2.477±0.49   | 7.48E-12 |
| cg09847584 | 12 | 131002386 | RIMBP2    | 3.037±0.293  | 1.965±0.991  | 7.50E-12 |
| cg15156836 | 1  | 26126415  | SEPN1     | -3.895±0.345 | -3.317±0.484 | 7.50E-12 |
| cg25112191 | 1  | 151804260 | RORC      | 0.2±0.159    | -0.5±0.649   | 7.56E-12 |
| cg11864993 | 5  | 140559832 | PCDHB16   | -0.745±0.253 | -0.237±0.447 | 7.60E-12 |

|            |    |           |          |              |              |          |
|------------|----|-----------|----------|--------------|--------------|----------|
| cg07408740 | 7  | 44645306  | OGDH     | -0.041±0.268 | -0.753±0.649 | 7.61E-12 |
| cg00035347 | 10 | 104953608 | NT5C2    | -0.475±0.352 | -0.958±0.346 | 7.71E-12 |
| cg18680834 | 19 | 30863349  | ZNF536   | -0.502±0.249 | -1.441±0.869 | 7.74E-12 |
| cg03003256 | 6  | 116849557 | FAM26D   | 0.811±0.257  | 0.091±0.66   | 7.74E-12 |
| cg13745346 | 16 | 89044523  | CBFA2T3  | 1.14±0.288   | 0.415±0.659  | 7.75E-12 |
| cg11520395 | 1  | 227924115 | JMJD4    | 0.321±0.16   | -0.143±0.426 | 7.80E-12 |
| cg25302419 | 5  | 11904015  | CTNND2   | -3.932±0.493 | -2.376±1.433 | 7.85E-12 |
| cg18573383 | 12 | 75603401  | KCNC2    | -3.636±0.353 | -2.487±1.061 | 7.91E-12 |
| cg10129493 | 19 | 51728586  | CD33     | 1.378±0.372  | 0.46±0.832   | 7.91E-12 |
| cg10586756 | 16 | 56782283  | NUP93    | 1.466±0.214  | 1.975±0.46   | 7.93E-12 |
| cg19965810 | 2  | 163695793 | KCNH7    | -3.261±0.565 | -1.852±1.28  | 8.05E-12 |
| cg06161930 | 19 | 56633191  | ZNF787   | -3.057±0.253 | -2.479±0.52  | 8.16E-12 |
| cg03172991 | 19 | 13105728  | NFIX     | 0.677±0.104  | 0.976±0.274  | 8.22E-12 |
| cg05161795 | 3  | 45018949  | EXOSC7   | 0.812±0.331  | 1.537±0.65   | 8.25E-12 |
| cg00615241 | 19 | 839689    | PRTN3    | -0.996±0.261 | -0.217±0.717 | 8.29E-12 |
| cg19882093 | 20 | 23969397  | GGTLC1   | 1.694±0.312  | 0.869±0.754  | 8.40E-12 |
| cg02284188 | 11 | 89541672  | TRIM49   | 1.796±0.222  | 1.078±0.664  | 8.72E-12 |
| cg06022562 | 17 | 80797881  | ZNF750   | 1.96±0.318   | 0.841±1.038  | 8.76E-12 |
| cg20507276 | 1  | 248100600 | OR2L13   | -2.103±1.354 | -0.508±0.931 | 8.79E-12 |
| cg25025243 | 11 | 67350234  | GSTP1    | -0.694±0.274 | -1.276±0.519 | 8.85E-12 |
| cg21790626 | 19 | 58220494  | ZNF154   | -4.051±0.596 | -1.924±1.975 | 8.86E-12 |
| cg09432376 | 22 | 36044226  | APOL6    | -1.16±0.291  | -1.941±0.716 | 8.90E-12 |
| cg24605304 | 12 | 5152766   | KCNA5    | -1.921±0.33  | -2.637±0.642 | 9.09E-12 |
| cg25935911 | 9  | 122132261 | DBC1     | -1.951±0.356 | -0.972±0.899 | 9.10E-12 |
| cg06690548 | 4  | 139162808 | SLC7A11  | 2.746±0.441  | 1.625±1.023  | 9.10E-12 |
| cg00775197 | 6  | 44265054  | TCTE1    | -3.724±0.381 | -2.62±1.016  | 9.15E-12 |
| cg03102516 | 2  | 97171383  | NEURL3   | 1.138±0.259  | 0.544±0.536  | 9.25E-12 |
| cg03355526 | 5  | 178368415 | ZNF454   | -1.423±0.513 | -0.353±0.954 | 9.27E-12 |
| cg11828089 | 7  | 71878121  | CALN1    | 3.06±0.425   | 1.963±1.004  | 9.37E-12 |
| cg04488758 | 12 | 95945366  | USP44    | 1.373±0.297  | 1.981±0.54   | 9.42E-12 |
| cg14586939 | 4  | 156130206 | NPY2R    | -4.778±0.525 | -3.489±1.174 | 9.46E-12 |
| cg10784813 | 16 | 11348678  | SOCS1    | 0.501±0.328  | -0.492±0.917 | 9.47E-12 |
| cg02595219 | 11 | 74178761  | KCNE3    | -2.932±0.525 | -1.978±0.826 | 9.50E-12 |
| cg06423920 | 3  | 62359420  | FEZF2    | -3.627±0.309 | -2.731±0.827 | 9.50E-12 |
| cg09025324 | 6  | 116691685 | DSE      | -2.98±0.449  | -2.097±0.78  | 9.57E-12 |
| cg06954481 | 2  | 237076497 | GBX2     | -2.955±0.772 | -1.409±1.37  | 9.64E-12 |
| cg02039171 | 14 | 23588162  | CEBPE    | 1.792±0.25   | 2.334±0.487  | 9.64E-12 |
| cg19486673 | 19 | 55085018  | LILRA2   | -0.476±0.33  | -1.387±0.838 | 9.74E-12 |
| cg04446579 | 1  | 173639071 | ANKRD45  | -3.17±0.37   | -2.074±1.012 | 9.74E-12 |
| cg22375192 | 15 | 99193466  | IGF1R    | -3.799±0.875 | -2.415±1.142 | 1.01E-11 |
| cg16512727 | 12 | 4649136   | RAD51AP1 | -0.599±0.239 | 0.014±0.561  | 1.01E-11 |
| cg07327468 | 6  | 133561765 | EYA4     | -2.366±0.314 | -1.451±0.846 | 1.01E-11 |
| cg07549194 | 19 | 49927076  | PTH2     | -1.43±0.339  | -0.742±0.612 | 1.02E-11 |
| cg12718562 | 15 | 74165861  | TBC1D21  | 2.17±0.276   | 1.335±0.773  | 1.02E-11 |
| cg20264106 | 6  | 165722858 | C6orf118 | -3.818±0.497 | -2.567±1.144 | 1.02E-11 |
| cg17271365 | 4  | 164534752 | 42430    | 1.206±0.339  | 0.249±0.883  | 1.03E-11 |
| cg06911084 | 7  | 96652894  | DLX5     | -2.154±0.405 | -1.137±0.93  | 1.03E-11 |
| cg23566503 | 20 | 36149750  | NNAT     | 0.99±0.184   | 1.548±0.517  | 1.04E-11 |
| cg20162076 | 6  | 6588089   | LY86     | 1.107±0.287  | 0.374±0.671  | 1.05E-11 |
| cg12432709 | 18 | 52627333  | CCDC68   | -0.036±0.297 | 0.532±0.499  | 1.06E-11 |
| cg25718438 | 20 | 43743921  | WFDC5    | 0.702±0.173  | 1.168±0.43   | 1.07E-11 |
| cg06937608 | 15 | 89346044  | ACAN     | -4.167±0.424 | -2.944±1.132 | 1.07E-11 |
| cg13701109 | 5  | 128795472 | ADAMTS19 | -2.766±0.422 | -1.589±1.087 | 1.08E-11 |
| cg17783509 | 4  | 41751001  | PHOX2B   | -2.38±0.233  | -1.39±0.928  | 1.08E-11 |
| cg15077070 | 2  | 102803290 | IL1RL2   | -0.43±0.327  | -1.326±0.827 | 1.08E-11 |
| cg23239396 | 7  | 93203695  | CALCR    | -3.029±0.329 | -2.044±0.914 | 1.08E-11 |
| cg06810647 | 16 | 1665094   | CRAMP1L  | -1.545±0.446 | -0.649±0.798 | 1.09E-11 |
| cg22359606 | 2  | 182545492 | NEUROD1  | -3.146±0.329 | -1.826±1.236 | 1.10E-11 |
| cg24417499 | 1  | 33351653  | HPCA     | -2.543±0.32  | -1.616±0.859 | 1.10E-11 |
| cg02305261 | 20 | 49638967  | KCNG1    | -2.439±0.346 | -1.637±0.729 | 1.11E-11 |
| cg23693510 | 9  | 23825759  | ELAVL2   | -3.956±0.403 | -2.864±1.009 | 1.13E-11 |
| cg15075718 | 11 | 119217176 | C1QTNF5  | 1.342±0.306  | 0.558±0.721  | 1.13E-11 |
| cg17031727 | 1  | 230777875 | COG2     | -2.531±0.346 | -1.499±0.958 | 1.15E-11 |
| cg11262874 | 19 | 23941711  | ZNF681   | -1.219±0.158 | -0.957±0.222 | 1.15E-11 |
| cg20804555 | 14 | 95235869  | GSC      | -3.518±0.304 | -2.289±1.153 | 1.15E-11 |
| cg00083937 | 22 | 51039805  | MAPK8IP2 | 0.271±0.174  | 0.882±0.571  | 1.15E-11 |
| cg04312209 | 5  | 35857130  | IL7R     | -1.79±0.312  | -2.627±0.772 | 1.15E-11 |
| cg21707816 | 3  | 38537451  | EXOGE    | 0.477±0.343  | -0.312±0.718 | 1.16E-11 |
| cg22506453 | 17 | 39122753  | KRT39    | 1.172±0.278  | 1.771±0.54   | 1.16E-11 |
| cg21303011 | 3  | 24537177  | THRB     | -2.376±0.552 | -3.363±0.857 | 1.19E-11 |

|            |    |           |           |              |              |          |
|------------|----|-----------|-----------|--------------|--------------|----------|
| cg12478185 | 17 | 10602001  | ADPRM     | -0.14±0.598  | -0.897±0.522 | 1.19E-11 |
| cg04008455 | 15 | 75661449  | MAN2C1    | -1.207±0.304 | -1.825±0.553 | 1.20E-11 |
| cg18312429 | 13 | 103718930 | SLC10A2   | 0.082±0.29   | -0.582±0.605 | 1.20E-11 |
| cg27196745 | 12 | 15475319  | PTPRO     | -2.938±0.378 | -1.809±1.051 | 1.21E-11 |
| cg06784466 | 19 | 52297968  | FPR3      | -0.339±0.316 | -1.02±0.615  | 1.21E-11 |
| cg11554605 | 7  | 95115354  | ASB4      | 1.548±0.3    | 2.302±0.694  | 1.22E-11 |
| cg21846488 | 1  | 152680843 | LCE4A     | 0.419±0.24   | -0.64±0.997  | 1.23E-11 |
| cg16387606 | 1  | 149832652 | HIST2H4B  | -4.355±0.268 | -2.843±1.427 | 1.23E-11 |
| cg26815414 | 13 | 113300120 | C13orf35  | 1.364±0.253  | 1.861±0.442  | 1.24E-11 |
| cg01204985 | 19 | 54849738  | LILRA4    | 1.41±0.219   | 0.49±0.865   | 1.24E-11 |
| cg22633722 | 21 | 44496743  | CBS       | -3.958±0.281 | -2.74±1.147  | 1.24E-11 |
| cg06357925 | 12 | 15475331  | PTPRO     | -4.309±0.48  | -2.923±1.287 | 1.24E-11 |
| cg16708012 | 12 | 108992114 | TMEM119   | 0.37±0.174   | 0.839±0.434  | 1.25E-11 |
| cg21201109 | 19 | 11307090  | KANK2     | 0.542±0.276  | 1.104±0.504  | 1.27E-11 |
| cg13722123 | 6  | 146350346 | GRM1      | -2.904±0.277 | -2.131±0.718 | 1.28E-11 |
| cg27371741 | 3  | 46619158  | TDGF1     | 1.368±0.269  | 2.007±0.585  | 1.28E-11 |
| cg01747665 | 16 | 1843424   | IGFALS    | 1.378±0.217  | 1.753±0.322  | 1.28E-11 |
| cg19774122 | 6  | 129204622 | LAMA2     | -3.162±0.38  | -1.755±1.322 | 1.29E-11 |
| cg17861230 | 19 | 18343901  | PDE4C     | -1.278±0.402 | 0.1±1.291    | 1.29E-11 |
| cg07115820 | 17 | 56270249  | EPX       | -0.047±0.226 | 0.672±0.672  | 1.29E-11 |
| cg00698688 | 19 | 49055432  | SULT2B1   | 0.652±0.249  | 0.048±0.554  | 1.29E-11 |
| cg14114267 | 2  | 174831503 | SP3       | 0.39±0.249   | -0.452±0.781 | 1.30E-11 |
| cg02613386 | 17 | 6679533   | FBXO39    | -1.909±0.394 | -0.654±1.173 | 1.31E-11 |
| cg03003745 | 19 | 42948167  | CXCL17    | -0.3±0.254   | -1.042±0.691 | 1.32E-11 |
| cg24352499 | 12 | 50360776  | 0         | -2.109±0.317 | -2.643±0.457 | 1.32E-11 |
| cg18623836 | 2  | 10261907  | RRM2      | 0.729±0.265  | 0.012±0.665  | 1.32E-11 |
| cg24127989 | 7  | 128049508 | IMPDH1    | -2.828±0.401 | -3.529±0.606 | 1.33E-11 |
| cg04126335 | 1  | 145525223 | ITGA10    | 1.363±0.204  | 1.848±0.445  | 1.34E-11 |
| cg15185794 | 1  | 17446087  | PADI2     | -3.353±0.237 | -3.872±0.471 | 1.34E-11 |
| cg06921282 | 11 | 536299    | HRAS      | -2.438±0.394 | -3.09±0.554  | 1.36E-11 |
| cg19372178 | 2  | 242126680 | ANO7      | 0.434±0.205  | -0.092±0.486 | 1.36E-11 |
| cg00199549 | 22 | 35795374  | MCM5      | 3.779±0.387  | 2.368±1.327  | 1.36E-11 |
| cg21754343 | 1  | 152658797 | LCE2B     | 1.582±0.303  | 0.394±1.119  | 1.36E-11 |
| cg26365854 | 11 | 44330903  | ALX4      | -4.243±0.389 | -2.678±1.475 | 1.37E-11 |
| cg26312150 | 7  | 19156550  | TWIST1    | -3.119±0.349 | -1.624±1.411 | 1.37E-11 |
| cg03801286 | 21 | 35884508  | KCNE1     | 1.205±0.347  | 1.792±0.504  | 1.40E-11 |
| cg24256211 | 14 | 55035215  | SAMD4A    | -2.841±0.429 | -2.109±0.63  | 1.41E-11 |
| cg11695358 | 8  | 144797963 | MAPK15    | 2.417±0.214  | 1.713±0.661  | 1.41E-11 |
| cg00260778 | 10 | 15140412  | C10orf111 | 0.144±0.403  | -0.489±0.527 | 1.42E-11 |
| cg24997562 | 12 | 121476720 | OASL      | -2.759±0.369 | -3.286±0.416 | 1.42E-11 |
| cg21309147 | 17 | 37382234  | STAC2     | -4.246±0.598 | -2.872±1.258 | 1.42E-11 |
| cg15543551 | 3  | 192445202 | FGF12     | -2.72±0.559  | -1.503±1.106 | 1.42E-11 |
| cg03704024 | 3  | 129598923 | TMCC1     | 1.024±0.319  | 1.57±0.453   | 1.44E-11 |
| cg03929796 | 3  | 52231840  | ALAS1     | -1.549±0.367 | -2.347±0.726 | 1.45E-11 |
| cg26578617 | 4  | 90757533  | LOC644248 | -3.607±0.466 | -2.328±1.19  | 1.46E-11 |
| cg22247240 | 14 | 74815187  | VRTN      | 1.116±0.322  | 1.71±0.524   | 1.47E-11 |
| cg22253945 | 2  | 105858489 | GPR45     | 1.93±0.4     | 1.19±0.653   | 1.47E-11 |
| cg14409941 | 5  | 178771781 | ADAMTS2   | -5.375±0.717 | -3.739±1.499 | 1.49E-11 |
| cg20625138 | 1  | 7913667   | UTS2      | -0.029±0.279 | 0.64±0.616   | 1.50E-11 |
| cg16140179 | 13 | 46275352  | SPERT     | 1.287±0.338  | 0.424±0.799  | 1.50E-11 |
| cg24642523 | 14 | 65009265  | HSPA2     | -1.986±0.274 | -0.788±1.134 | 1.51E-11 |
| cg18055007 | 6  | 31698226  | DDAH2     | -1.911±0.436 | -0.537±1.291 | 1.53E-11 |
| cg18596794 | 1  | 167689891 | MPZL1     | 1.667±0.332  | 0.823±0.782  | 1.53E-11 |
| cg00318573 | 20 | 61993118  | CHRNA4    | -1.625±0.355 | -0.766±0.792 | 1.54E-11 |
| cg16826286 | 17 | 34266290  | LYZL6     | 1.026±0.194  | 0.473±0.517  | 1.54E-11 |
| cg05109049 | 17 | 29641333  | EVI2B     | 0.336±0.402  | -0.884±1.132 | 1.54E-11 |
| cg12334759 | 19 | 475154    | ODF3L2    | 1.467±0.302  | 0.657±0.753  | 1.56E-11 |
| cg05417950 | 4  | 123843025 | NUDT6     | -2.509±0.481 | -1.675±0.724 | 1.58E-11 |
| cg22886089 | 15 | 51973591  | SCG3      | -4.934±0.454 | -3.355±1.49  | 1.58E-11 |
| cg15586352 | 19 | 43691143  | PSG5      | 0.875±0.183  | 0.457±0.384  | 1.58E-11 |
| cg20557202 | 19 | 17982930  | SLC5A5    | -4.278±0.588 | -3.011±1.155 | 1.58E-11 |
| cg15669228 | 9  | 21409505  | IFNA8     | 1.17±0.248   | 0.432±0.692  | 1.60E-11 |
| cg04975920 | 1  | 46646224  | TSPAN1    | -0.51±0.318  | -1.104±0.527 | 1.60E-11 |
| cg20415809 | 2  | 182321855 | ITGA4     | -4.441±0.534 | -2.664±1.674 | 1.60E-11 |
| cg02311163 | 20 | 43850511  | SEMG2     | 1.999±0.286  | 1.096±0.85   | 1.61E-11 |
| cg26154999 | 2  | 225266346 | FAM124B   | 0.017±0.249  | 0.684±0.622  | 1.62E-11 |
| cg00579393 | 2  | 79316004  | REG1B     | 2.143±0.418  | 1.064±0.992  | 1.63E-11 |
| cg22674717 | 16 | 51185394  | SALL1     | -4.491±0.685 | -3.166±1.185 | 1.64E-11 |
| cg07973461 | 21 | 11098794  | BAGE3     | 2.626±0.366  | 1.717±0.843  | 1.66E-11 |
| cg00498604 | 4  | 166793789 | TLL1      | -2.937±0.394 | -1.647±1.216 | 1.67E-11 |

|            |    |           |               |              |              |          |
|------------|----|-----------|---------------|--------------|--------------|----------|
| cg14944362 | 20 | 1974924   | PDYN          | -1.039±0.191 | -1.633±0.559 | 1.68E-11 |
| cg12153542 | 20 | 30063129  | REM1          | -4.572±0.338 | -3.604±0.907 | 1.69E-11 |
| cg22709192 | 12 | 54366909  | HOXC11        | -2.07±0.456  | -0.757±1.231 | 1.71E-11 |
| cg15303841 | 22 | 29833804  | RFPL1         | 2.331±0.297  | 1.575±0.703  | 1.71E-11 |
| cg25268718 | 14 | 24604711  | PSME1         | -0.509±0.17  | -0.983±0.443 | 1.72E-11 |
| cg26608199 | 13 | 113776126 | F10           | 2.371±0.214  | 1.572±0.758  | 1.74E-11 |
| cg03623878 | 13 | 113655560 | MCF2L         | -2.886±0.678 | -3.771±0.649 | 1.74E-11 |
| cg15415545 | 16 | 30206046  | SLX1A-SULT1A3 | -5.066±0.594 | -3.258±1.702 | 1.76E-11 |
| cg27390220 | 3  | 45268523  | TMEM158       | -0.377±0.256 | 0.267±0.598  | 1.79E-11 |
| cg21432954 | 13 | 38443809  | TRPC4         | -4.148±0.585 | -2.933±1.104 | 1.80E-11 |
| cg01404615 | 4  | 107958572 | DKK2          | -3.742±0.424 | -2.385±1.281 | 1.80E-11 |
| cg25552492 | 8  | 22013999  | LG3           | -3.642±0.373 | -2.866±0.706 | 1.81E-11 |
| cg16794882 | 5  | 70670374  | PMCHL2        | 1.473±0.28   | 0.734±0.691  | 1.82E-11 |
| cg26955850 | 20 | 3052345   | OXT           | -0.62±0.33   | 0.157±0.719  | 1.82E-11 |
| cg07456645 | 19 | 4769146   | MIR7-3HG      | -3.095±0.468 | -2.152±0.854 | 1.84E-11 |
| cg00061629 | 11 | 44325258  | ALX4          | -1.956±0.644 | -0.396±1.448 | 1.84E-11 |
| cg13817266 | 1  | 161494402 | HSPA6         | -0.509±0.265 | -0.141±0.289 | 1.86E-11 |
| cg20609368 | 11 | 5257253   | HBD           | 2.905±0.257  | 1.992±0.866  | 1.89E-11 |
| cg05468303 | 22 | 18894389  | DGCR6         | -2.169±0.324 | -2.722±0.481 | 1.90E-11 |
| cg11201229 | 11 | 17191235  | PIK3C2A       | 1.613±0.38   | 2.181±0.465  | 1.90E-11 |
| cg20468883 | 15 | 59982396  | BNIP2         | -1.405±0.251 | -1.886±0.432 | 1.90E-11 |
| cg27495845 | 1  | 161693088 | FCRLB         | 0.32±0.256   | -0.487±0.762 | 1.90E-11 |
| cg13434203 | 19 | 43244502  | PSG3          | 2.214±0.149  | 1.522±0.661  | 1.92E-11 |
| cg16192029 | 7  | 117864674 | ANKRD7        | 4.822±0.337  | 3.346±1.408  | 1.92E-11 |
| cg00476577 | 20 | 52200408  | ZNF217        | -3.443±0.378 | -4.04±0.505  | 1.92E-11 |
| cg02564523 | 7  | 102073539 | ORAI2         | -1.97±0.382  | -2.7±0.656   | 1.93E-11 |
| cg15188688 | 22 | 19468342  | CDC45         | 0.982±0.362  | 1.556±0.485  | 1.93E-11 |
| cg20632573 | 11 | 20621341  | SLC6A5        | -4.022±0.507 | -2.985±0.943 | 1.94E-11 |
| cg00623593 | 10 | 128767610 | DOCK1         | 3.03±0.188   | 2.723±0.263  | 1.94E-11 |
| cg17982671 | 19 | 39735568  | IFNL3         | 1.091±0.25   | 1.682±0.548  | 1.94E-11 |
| cg17692403 | 20 | 42964959  | R3HDML        | -2.87±0.368  | -1.958±0.849 | 1.95E-11 |
| cg04034767 | 12 | 52400907  | GRASP         | -3.693±0.52  | -1.788±1.811 | 1.96E-11 |
| cg07109801 | 3  | 49057661  | MIR425        | 0.463±0.231  | -0.238±0.662 | 1.96E-11 |
| cg03874127 | 6  | 109169135 | ARMC2         | 1.277±0.358  | 0.531±0.68   | 1.97E-11 |
| cg12610744 | 12 | 53208762  | KRT4          | 0.321±0.197  | -0.337±0.624 | 1.97E-11 |
| cg06778853 | 1  | 6672620   | PHF13         | -1.538±0.316 | -2.344±0.753 | 2.05E-11 |
| cg01405761 | 8  | 62200689  | CLVS1         | -3.27±0.505  | -2.086±1.099 | 2.05E-11 |
| cg07039362 | 16 | 55908870  | CES5A         | 2.021±0.271  | 1.184±0.791  | 2.06E-11 |
| cg18705301 | 15 | 41695430  | NDUFAF1       | 0.763±0.382  | -0.05±0.745  | 2.06E-11 |
| cg22571530 | 1  | 204797929 | NFASC         | -3.262±0.457 | -1.719±1.466 | 2.07E-11 |
| cg12792011 | 19 | 58661915  | ZNF329        | -4.918±0.506 | -2.586±2.23  | 2.07E-11 |
| cg22898761 | 2  | 202148976 | CASP8         | 1.374±0.2    | 1.031±0.301  | 2.08E-11 |
| cg04598121 | 8  | 57358505  | PENK          | -1.983±0.422 | -1.01±0.902  | 2.11E-11 |
| cg03663215 | 5  | 7396491   | ADCY2         | -4.089±0.528 | -2.913±1.086 | 2.11E-11 |
| cg04498511 | 1  | 203768441 | ZBED6         | 1.861±0.287  | 2.277±0.337  | 2.12E-11 |
| cg12261786 | 10 | 88727830  | ADIRF         | -0.808±0.284 | -0.177±0.582 | 2.16E-11 |
| cg15820955 | 12 | 48192939  | HDAC7         | 1.704±0.261  | 2.233±0.482  | 2.18E-11 |
| cg01894895 | 9  | 75766294  | ANXA1         | 2.52±0.192   | 2.076±0.412  | 2.18E-11 |
| cg25766046 | 9  | 94712122  | ROR2          | -2.573±0.488 | -1.445±1.046 | 2.18E-11 |
| cg22325703 | 11 | 94134235  | GPR83         | -4.037±0.373 | -2.797±1.179 | 2.19E-11 |
| cg01469547 | 11 | 7847155   | OR5P3         | 3.336±0.347  | 1.919±1.355  | 2.19E-11 |
| cg15674432 | 6  | 35992082  | SLC26A8       | -1.383±0.284 | -0.595±0.744 | 2.25E-11 |
| cg05406101 | 21 | 30392219  | RWDD2B        | 2.609±0.363  | 1.415±1.137  | 2.28E-11 |
| cg19297688 | 9  | 5231360   | INSL4         | 2.615±0.285  | 1.889±0.68   | 2.30E-11 |
| cg26538442 | 16 | 66994947  | CES3          | 1.655±0.221  | 0.827±0.792  | 2.30E-11 |
| cg23739862 | 12 | 3600666   | PRMT8         | -3.804±0.684 | -2.203±1.491 | 2.30E-11 |
| cg08090640 | 17 | 41159289  | IFI35         | -1.879±0.335 | -2.43±0.476  | 2.31E-11 |
| cg19896198 | 1  | 12123262  | TNFRSF8       | -3.306±0.321 | -2.103±1.151 | 2.38E-11 |
| cg00739120 | 19 | 36035875  | TMEM147       | -0.887±0.294 | -0.074±0.768 | 2.38E-11 |
| cg00554250 | 11 | 47281370  | NR1H3         | 0.11±0.266   | 0.759±0.607  | 2.40E-11 |
| cg07980518 | 18 | 59560394  | RNF152        | -4.399±0.453 | -3.024±1.306 | 2.40E-11 |
| cg23402444 | 10 | 104178866 | PSD           | -4.38±0.381  | -3.757±0.538 | 2.40E-11 |
| cg19399100 | 4  | 70519695  | UGT2A1        | 0.605±0.266  | 1.085±0.422  | 2.40E-11 |
| cg02421543 | 1  | 93810826  | LOC100131564  | -3.044±0.455 | -3.653±0.467 | 2.41E-11 |
| cg22549408 | 18 | 57566300  | PMAIP1        | -0.575±0.356 | -1.206±0.56  | 2.43E-11 |
| cg02519218 | 12 | 133424286 | CHFR          | 0.94±0.27    | 1.578±0.595  | 2.43E-11 |
| cg18509435 | 18 | 59157879  | CDH20         | 2.116±0.379  | 1.234±0.822  | 2.49E-11 |
| cg26651233 | 14 | 85996101  | FLRT2         | -2.943±0.218 | -1.989±0.917 | 2.49E-11 |
| cg22678136 | 15 | 25093521  | SNRPN         | -0.052±0.504 | 0.89±0.848   | 2.50E-11 |
| cg27404050 | 19 | 36303880  | PRODH2        | -0.437±0.302 | -1.146±0.662 | 2.51E-11 |

|            |    |           |             |              |              |          |
|------------|----|-----------|-------------|--------------|--------------|----------|
| cg04884908 | 2  | 72374840  | CYP26B1     | -2.303±0.427 | -1.258±0.979 | 2.51E-11 |
| cg26244225 | 12 | 12938082  | APOLD1      | 0.375±0.223  | 0.823±0.409  | 2.53E-11 |
| cg11319389 | 20 | 42544648  | TOX2        | -3.04±0.29   | -1.748±1.242 | 2.57E-11 |
| cg05316065 | 8  | 130799007 | GSDMC       | -1.162±0.233 | -1.771±0.575 | 2.60E-11 |
| cg16334795 | 21 | 42538894  | MIR3197     | -1.413±0.394 | -0.651±0.685 | 2.65E-11 |
| cg21500966 | 11 | 89867976  | NAALAD2     | -4.284±0.489 | -2.832±1.382 | 2.67E-11 |
| cg27223827 | 2  | 106054920 | FHL2        | -0.61±0.266  | 0.014±0.583  | 2.68E-11 |
| cg26024843 | 9  | 137533949 | COL5A1      | -3.413±0.686 | -2.303±0.958 | 2.68E-11 |
| cg09314766 | 8  | 39695697  | ADAM2       | 3.363±0.23   | 2.9±0.423    | 2.70E-11 |
| cg23349790 | 1  | 18434576  | IGSF21      | -2.053±1.046 | -0.551±1.222 | 2.74E-11 |
| cg00573606 | 2  | 238322680 | COL6A3      | 0.328±0.248  | 0.98±0.616   | 2.75E-11 |
| cg04103514 | 19 | 14889425  | EMR2        | -1.392±0.381 | -2.054±0.587 | 2.75E-11 |
| cg10016608 | 17 | 34079665  | GAS2L2      | -0.504±0.177 | -0.962±0.432 | 2.80E-11 |
| cg09242541 | 1  | 10490025  | APITD1-CORT | -0.66±0.231  | -1.266±0.573 | 2.81E-11 |
| cg07078114 | 9  | 139606202 | FAM69B      | -1.322±0.289 | -2.31±0.948  | 2.81E-11 |
| cg05203877 | 14 | 70655686  | SLC8A3      | -4.231±0.315 | -2.665±1.513 | 2.82E-11 |
| cg11800672 | 8  | 145642291 | SLC39A4     | 0.699±0.304  | -0.193±0.851 | 2.84E-11 |
| cg23694248 | 12 | 71314315  | PTPRR       | -2.843±0.27  | -1.725±1.078 | 2.86E-11 |
| cg03620376 | 19 | 54984272  | CDC42EP5    | -3.766±0.377 | -3.161±0.522 | 2.87E-11 |
| cg20300246 | 9  | 139096747 | LHX3        | -2.4±0.338   | -1.456±0.898 | 2.87E-11 |
| cg23092823 | 1  | 53528612  | PODN        | -3.22±0.417  | -1.893±1.269 | 2.90E-11 |
| cg14127336 | 14 | 96180319  | TCL1A       | 2.903±0.478  | 1.816±1.016  | 2.90E-11 |
| cg17371081 | 11 | 20690957  | NELL1       | -3.908±0.768 | -2.26±1.529  | 2.94E-11 |
| cg01617750 | 3  | 32279261  | CMTM8       | -0.494±0.413 | 0.427±0.858  | 2.94E-11 |
| cg06906435 | 14 | 99177777  | C14orf177   | 0.625±0.261  | -0.392±0.98  | 2.96E-11 |
| cg21475402 | 1  | 156612140 | BCAN        | -2.865±0.46  | -1.641±1.161 | 2.96E-11 |
| cg22705929 | 11 | 57417974  | YPEL4       | -1.709±0.342 | -0.996±0.658 | 2.97E-11 |
| cg10305797 | 19 | 35981677  | KRTDAP      | 1.087±0.286  | 0.196±0.853  | 2.99E-11 |
| cg26055770 | 3  | 73674070  | PDZRN3      | -2.632±0.568 | -1.516±1.021 | 3.00E-11 |
| cg18581445 | 19 | 4280054   | SHD         | -3.608±0.348 | -2.72±0.84   | 3.02E-11 |
| cg17671157 | 14 | 88793036  | KCNK10      | -4.048±0.387 | -2.885±1.112 | 3.06E-11 |
| cg08072716 | 3  | 51989692  | GPR62       | -0.023±0.155 | 0.407±0.41   | 3.07E-11 |
| cg13448625 | 10 | 105845238 | COL17A1     | 2.305±0.223  | 1.512±0.764  | 3.10E-11 |
| cg02633817 | 19 | 35606732  | FXYD3       | 1.169±0.293  | 0.263±0.868  | 3.10E-11 |
| cg25802093 | 10 | 22634038  | SPAG6       | -2.088±0.406 | -0.776±1.259 | 3.10E-11 |
| cg19556572 | 9  | 117156701 | AKNA        | 1.631±0.238  | 2.036±0.358  | 3.10E-11 |
| cg16133244 | 16 | 1400833   | TSR3        | 1.772±0.173  | 2.156±0.358  | 3.11E-11 |
| cg12119029 | 16 | 89752879  | CDK10       | -0.701±0.316 | -1.32±0.567  | 3.12E-11 |
| cg04464446 | 11 | 68452845  | GAL         | 0.352±0.21   | -0.269±0.594 | 3.13E-11 |
| cg13847070 | 5  | 137071523 | KLHL3       | -2.532±0.459 | -1.337±1.123 | 3.14E-11 |
| cg07117700 | 17 | 61903327  | PSMC5       | 2.093±0.271  | 2.572±0.429  | 3.21E-11 |
| cg25620220 | 11 | 62457325  | LRRN4CL     | 1.523±0.279  | 2.04±0.469   | 3.28E-11 |
| cg04172348 | 3  | 12046004  | SYN2        | -4.355±0.509 | -2.805±1.486 | 3.30E-11 |
| cg21051046 | 7  | 155248393 | 0           | -2.509±0.381 | -1.464±0.996 | 3.30E-11 |
| cg05649009 | 2  | 175629850 | CHRNA1      | 1.48±0.334   | 0.563±0.875  | 3.31E-11 |
| cg09551147 | 10 | 106399957 | SORCS3      | -4.51±0.601  | -3.094±1.334 | 3.31E-11 |
| cg18714560 | 11 | 628302    | SCT         | 2.328±0.31   | 1.559±0.728  | 3.33E-11 |
| cg21142272 | 16 | 67224341  | EXOC3L1     | -0.34±0.244  | 0.193±0.499  | 3.34E-11 |
| cg09745307 | 5  | 35048945  | AGXT2       | 0.496±0.311  | -0.221±0.674 | 3.36E-11 |
| cg25336198 | 11 | 2182618   | INS-IGF2    | 0.578±0.271  | -0.078±0.62  | 3.36E-11 |
| cg10934032 | 14 | 21249405  | RNASE6      | 0.08±0.286   | -0.885±0.931 | 3.37E-11 |
| cg03017475 | 7  | 141674341 | TAS2R38     | 1.019±0.28   | 0.32±0.642   | 3.39E-11 |
| cg11946165 | 1  | 150781434 | CTSK        | 1.207±0.327  | 1.695±0.41   | 3.41E-11 |
| cg25006823 | 14 | 67982456  | TMEM229B    | -0.883±0.251 | -1.362±0.438 | 3.46E-11 |
| cg01830294 | 7  | 116963492 | WNT2        | -1.425±0.381 | -0.571±0.801 | 3.47E-11 |
| cg17423978 | 20 | 1539641   | SIRPD       | 1.666±0.383  | 0.679±0.938  | 3.47E-11 |
| cg06918467 | 6  | 137815539 | OLIG3       | -2.917±0.225 | -1.952±0.937 | 3.49E-11 |
| cg05664072 | 2  | 239198294 | PER2        | -3.164±0.34  | -2.247±0.876 | 3.53E-11 |
| cg14289461 | 6  | 112575929 | LAMA4       | -0.971±0.348 | -0.237±0.683 | 3.54E-11 |
| cg21237418 | 17 | 27045043  | RAB34       | -0.58±0.309  | -1.467±0.85  | 3.58E-11 |
| cg12815916 | 2  | 131114432 | PTPN18      | 4.447±0.286  | 3.011±1.398  | 3.65E-11 |
| cg27067618 | 19 | 15751949  | CYP4F3      | -0.909±0.301 | -1.515±0.56  | 3.65E-11 |
| cg19297823 | 5  | 74327281  | GCNT4       | -0.788±0.377 | -0.166±0.547 | 3.69E-11 |
| cg03908676 | 11 | 10590282  | LYVE1       | -0.93±0.265  | -0.275±0.623 | 3.73E-11 |
| cg11207564 | 17 | 34523735  | CCL3L3      | -1.704±0.37  | -2.471±0.714 | 3.73E-11 |
| cg01293647 | 17 | 37764264  | NEUROD2     | -3.912±0.508 | -2.779±1.064 | 3.73E-11 |
| cg07102705 | 5  | 148033896 | HTR4        | -3.301±0.683 | -2.147±1.024 | 3.75E-11 |
| cg02044879 | 10 | 74714935  | PLA2G12B    | 0.883±0.255  | 0.064±0.791  | 3.79E-11 |
| cg15309006 | 16 | 23766116  | CHP2        | -2.975±0.69  | -1.502±1.377 | 3.79E-11 |
| cg14189571 | 4  | 188916943 | ZFP42       | -1.054±0.474 | -0.059±0.928 | 3.86E-11 |

|            |    |           |           |              |              |          |
|------------|----|-----------|-----------|--------------|--------------|----------|
| cg12200412 | 1  | 158324331 | CD1E      | -0.164±0.167 | -1.05±0.864  | 3.90E-11 |
| cg15228639 | 15 | 42289939  | PLA2G4E   | 0.204±0.229  | -0.485±0.664 | 3.91E-11 |
| cg13526007 | 14 | 42076710  | LRFN5     | -3.183±0.328 | -2.171±0.976 | 3.93E-11 |
| cg21032583 | 3  | 197685803 | IQCG      | 2.687±0.344  | 1.357±1.293  | 3.94E-11 |
| cg15547534 | 7  | 100034410 | PPP1R35   | -3.575±0.274 | -4.311±0.705 | 3.97E-11 |
| cg16666160 | 9  | 127269631 | NR5A1     | 5.709±0.359  | 4.996±0.66   | 4.00E-11 |
| cg08899626 | 4  | 16900199  | LDB2      | -2.577±0.474 | -1.699±0.801 | 4.04E-11 |
| cg21363706 | 8  | 18066485  | NAT1      | 2.762±0.263  | 2.023±0.71   | 4.13E-11 |
| cg19664945 | 2  | 54087343  | GPR75     | 0.076±0.271  | 0.842±0.737  | 4.16E-11 |
| cg22601917 | 1  | 9294274   | H6PD      | -0.729±0.38  | -1.439±0.65  | 4.21E-11 |
| cg16051027 | 20 | 32320358  | ZNF341    | -4.443±0.357 | -4.872±0.296 | 4.22E-11 |
| cg16937611 | 14 | 95048102  | SERPINA5  | 1.223±0.177  | 0.201±1.001  | 4.22E-11 |
| cg11832722 | 18 | 28623060  | DSC3      | -2.404±0.457 | -1.032±1.325 | 4.24E-11 |
| cg06121469 | 15 | 44956098  | SPG11     | -4.178±0.414 | -4.714±0.409 | 4.30E-11 |
| cg07747336 | 11 | 125649398 | PATE2     | 1.045±0.272  | 0.119±0.899  | 4.36E-11 |
| cg09418321 | 12 | 4699618   | DYRK4     | 0.497±0.289  | -0.297±0.763 | 4.36E-11 |
| cg15210427 | 20 | 23548991  | CST9L     | 0.287±0.199  | -0.416±0.684 | 4.41E-11 |
| cg13287780 | 21 | 40751665  | WRB       | 1.948±0.266  | 0.862±1.06   | 4.42E-11 |
| cg08398233 | 1  | 20811641  | CAMK2N1   | -2.183±0.277 | -1.219±0.937 | 4.45E-11 |
| cg01946401 | 6  | 45296101  | RUNX2     | 0.384±0.276  | -0.505±0.853 | 4.45E-11 |
| cg11591325 | 5  | 76012591  | F2R       | -5.011±0.65  | -3.581±1.348 | 4.46E-11 |
| cg14289511 | 16 | 24682446  | 0         | -2.59±0.571  | -1.42±1.093  | 4.46E-11 |
| cg10316764 | 16 | 29984665  | TAOK2     | -0.8±0.328   | -0.119±0.631 | 4.49E-11 |
| cg04297093 | 21 | 31864374  | KRTAP19-3 | 1.309±0.305  | 0.371±0.909  | 4.54E-11 |
| cg02992632 | 3  | 192445380 | FGF12     | -3.778±0.424 | -2.723±1.008 | 4.55E-11 |
| cg25182523 | 1  | 184944288 | FAM129A   | 0.104±0.241  | -0.768±0.85  | 4.56E-11 |
| cg12237269 | 11 | 107582734 | SLN       | 0.986±0.206  | 0.263±0.703  | 4.57E-11 |
| cg16673198 | 3  | 131754273 | CPNE4     | 2.173±0.266  | 1.375±0.773  | 4.57E-11 |
| cg06437862 | 13 | 19756096  | TUBA3C    | 2.809±0.508  | 1.469±1.287  | 4.59E-11 |
| cg05511517 | 1  | 120612730 | NOTCH2    | -2.945±0.336 | -3.432±0.407 | 4.62E-11 |
| cg14792480 | 16 | 66954257  | CDH16     | -0.647±0.234 | -0.104±0.516 | 4.64E-11 |
| cg17703554 | 8  | 88886339  | DCAF4L2   | 2.991±0.372  | 1.878±1.077  | 4.66E-11 |
| cg26743024 | 17 | 64960282  | CACNG4    | -1.017±0.222 | -0.531±0.459 | 4.77E-11 |
| cg23813257 | 16 | 3115286   | IL32      | -1.994±0.413 | -2.713±0.649 | 4.78E-11 |
| cg25538571 | 8  | 49502710  | 0         | 0.248±0.339  | -0.795±1.012 | 4.83E-11 |
| cg14467840 | 1  | 153600972 | S100A1    | 3.114±0.315  | 2.594±0.462  | 4.84E-11 |
| cg24176563 | 6  | 133562776 | EYA4      | -3.225±0.488 | -1.823±1.357 | 4.92E-11 |
| cg08640498 | 12 | 57828515  | INHBC     | -0.748±0.244 | -0.276±0.438 | 4.94E-11 |
| cg16638540 | 19 | 58570468  | ZNF135    | -2.082±0.632 | -0.713±1.292 | 4.94E-11 |
| cg15443822 | 17 | 3867014   | ATP2A3    | -4.047±0.526 | -2.423±1.578 | 4.98E-11 |
| cg22461018 | 4  | 174538011 | 0         | 0.927±0.295  | 0.226±0.669  | 4.98E-11 |
| cg15699524 | 5  | 170845610 | FGF18     | 0.674±0.282  | -0.021±0.666 | 5.02E-11 |
| cg12638745 | 21 | 40816464  | LCA5L     | -1.427±0.368 | -0.679±0.696 | 5.04E-11 |
| cg12558519 | 19 | 18748017  | KLHL26    | -3.966±0.487 | -4.575±0.452 | 5.08E-11 |
| cg15750705 | 1  | 35226707  | GJB4      | 3.219±0.33   | 2.227±0.963  | 5.13E-11 |
| cg18267374 | 8  | 24771273  | NEFM      | -3.31±0.541  | -1.818±1.443 | 5.18E-11 |
| cg08753553 | 8  | 7343357   | DEFB106A  | 2.507±0.24   | 1.946±0.53   | 5.20E-11 |
| cg07810156 | 1  | 47655682  | PDZK1IP1  | 0.843±0.256  | 0.139±0.68   | 5.22E-11 |
| cg24528523 | 11 | 2923808   | SLC22A18  | -2.023±0.257 | -2.344±0.24  | 5.27E-11 |
| cg09155025 | 8  | 145642024 | SLC39A4   | 1.799±0.313  | 0.957±0.813  | 5.31E-11 |
| cg25908985 | 2  | 219925065 | IHH       | -3.427±0.525 | -2.314±1.05  | 5.35E-11 |
| cg22182945 | 4  | 71200583  | CABS1     | 2.132±0.24   | 1.275±0.839  | 5.40E-11 |
| cg23187653 | 5  | 95769008  | PCSK1     | -4.199±0.443 | -2.89±1.272  | 5.43E-11 |
| cg22286764 | 3  | 37428639  | 0         | 1.92±0.295   | 2.387±0.411  | 5.44E-11 |
| cg10141715 | 12 | 101603453 | SLC5A8    | -1.998±0.437 | -0.894±1.062 | 5.46E-11 |
| cg23941599 | 5  | 114880796 | FEM1C     | -2.431±0.315 | -2.938±0.449 | 5.46E-11 |
| cg09532664 | 5  | 9631216   | TAS2R1    | 2.167±0.428  | 1.089±1.005  | 5.47E-11 |
| cg26832142 | 1  | 66258441  | PDE4B     | -3.39±0.399  | -2.338±1.016 | 5.48E-11 |
| cg20330472 | 6  | 133561932 | EYA4      | -3.839±0.453 | -2.514±1.288 | 5.57E-11 |
| cg26145228 | 1  | 107682504 | NTNG1     | -1.16±0.216  | -0.632±0.508 | 5.65E-11 |
| cg12073779 | 2  | 208989469 | CRYGD     | -1.544±0.352 | -0.402±1.116 | 5.71E-11 |
| cg04902405 | 1  | 203768517 | ZBED6     | 0.86±0.357   | 1.423±0.494  | 5.76E-11 |
| cg23250700 | 19 | 13056068  | RAD23A    | 2.061±0.373  | 1.452±0.542  | 5.81E-11 |
| cg01920232 | 12 | 106976668 | RFX4      | -3.54±0.287  | -2.383±1.139 | 5.84E-11 |
| cg00859655 | 11 | 7694524   | CYB5R2    | 1.943±0.223  | 1.343±0.582  | 5.84E-11 |
| cg26251865 | 19 | 44220214  | IRGC      | -1.396±0.308 | -0.686±0.678 | 5.84E-11 |
| cg06244906 | 19 | 57307081  | ZIM2      | 0.989±0.392  | 0.124±0.824  | 6.14E-11 |
| cg17233601 | 11 | 18814418  | PTPN5     | 0.021±0.199  | 0.657±0.623  | 6.15E-11 |
| cg21435394 | 14 | 105648024 | NUDT14    | -2.266±0.271 | -2.818±0.52  | 6.19E-11 |
| cg24541550 | 11 | 10715360  | MRVI1     | 0.897±0.166  | 1.25±0.335   | 6.20E-11 |

|            |    |           |                |              |              |          |
|------------|----|-----------|----------------|--------------|--------------|----------|
| cg12847373 | 13 | 78493349  | EDNRB          | -5.086±0.494 | -4.171±0.847 | 6.28E-11 |
| cg15078027 | 19 | 13858619  | CCDC130        | -3.007±1.639 | -5.082±1.578 | 6.32E-11 |
| cg17108819 | 2  | 87017953  | CD8A           | -4.74±0.621  | -3.077±1.614 | 6.34E-11 |
| cg24992780 | 19 | 14911551  | OR7C1          | 2.489±0.29   | 1.646±0.823  | 6.51E-11 |
| cg19987219 | 1  | 47016749  | KNCN           | 2.38±0.355   | 3.009±0.577  | 6.51E-11 |
| cg14580982 | 2  | 10861364  | ATP6V1C2       | -3.78±0.371  | -4.325±0.466 | 6.52E-11 |
| cg04349727 | 19 | 51457389  | KLK5           | 0.63±0.38    | -0.185±0.776 | 6.65E-11 |
| cg03898365 | 11 | 6897491   | OR10A4         | -0.547±0.367 | -1.208±0.609 | 6.75E-11 |
| cg22438810 | 9  | 130911792 | LCN2           | 0.642±0.296  | -0.057±0.672 | 6.75E-11 |
| cg13461509 | 1  | 53387576  | ECHDC2         | -4.471±0.49  | -5.059±0.421 | 6.80E-11 |
| cg12838902 | 7  | 5322586   | SLC29A4        | -0.108±0.266 | 0.234±0.265  | 6.90E-11 |
| cg21663122 | 6  | 26250936  | HIST1H3F       | -4.128±0.487 | -2.535±1.566 | 6.90E-11 |
| cg10484958 | 13 | 53424127  | PCDH8          | -3.284±0.365 | -2.385±0.869 | 6.94E-11 |
| cg05072008 | 7  | 50518647  | FIGNL1         | 0.023±0.397  | -0.957±0.949 | 6.94E-11 |
| cg00480115 | 19 | 35606877  | FXYD3          | 0.998±0.304  | 0.077±0.903  | 6.95E-11 |
| cg26723847 | 11 | 134095652 | VPS26B         | -3.673±0.454 | -2.857±0.753 | 7.02E-11 |
| cg19145398 | 20 | 30433673  | FOXS1          | -1.118±0.205 | -0.378±0.73  | 7.04E-11 |
| cg18986165 | 19 | 52005990  | SIGLEC12       | 3.372±0.427  | 2.179±1.165  | 7.14E-11 |
| cg24690731 | 8  | 10589093  | SOX7           | -1.082±0.305 | -1.824±0.718 | 7.23E-11 |
| cg00406844 | 22 | 32753939  | RFPL3          | 1.38±0.292   | 0.67±0.687   | 7.25E-11 |
| cg20125091 | 1  | 92952641  | GFI1           | -1.388±0.262 | -0.407±0.97  | 7.26E-11 |
| cg21627181 | 6  | 25754190  | SLC17A4        | 1.141±0.271  | 1.887±0.728  | 7.29E-11 |
| cg15952487 | 1  | 158300733 | CD1B           | -0.09±0.248  | -1.007±0.907 | 7.46E-11 |
| cg25519930 | 12 | 2161640   | CACNA1C        | -3.327±0.79  | -1.907±1.239 | 7.48E-11 |
| cg20993403 | 20 | 34700329  | EPB41L1        | 0.429±0.218  | -0.422±0.843 | 7.49E-11 |
| cg18959422 | 1  | 203145364 | MYBPH          | -0.15±0.297  | -0.958±0.789 | 7.53E-11 |
| cg10917619 | 2  | 51255627  | NRXN1          | -0.019±0.238 | -0.714±0.682 | 7.56E-11 |
| cg06509940 | 3  | 119278914 | CD80           | 2.659±0.442  | 1.788±0.81   | 7.56E-11 |
| cg07426960 | 11 | 69469290  | 0              | -0.199±0.218 | -0.92±0.711  | 7.56E-11 |
| cg10399228 | 11 | 36590244  | RAG1           | 0.784±0.284  | 0.044±0.713  | 7.57E-11 |
| cg04126866 | 10 | 85932763  | C10orf99       | 2.924±0.231  | 2.432±0.47   | 7.61E-11 |
| cg00420929 | 19 | 18451112  | PGPEP1         | -0.525±0.182 | -1.053±0.518 | 7.61E-11 |
| cg02332492 | 9  | 139840678 | C8G            | 2.511±0.292  | 1.772±0.719  | 7.69E-11 |
| cg15272684 | 1  | 36024473  | NCDN           | 0.76±0.168   | 1.152±0.379  | 7.69E-11 |
| cg13759328 | 16 | 82661521  | CDH13          | -3.115±0.362 | -2.22±0.868  | 7.70E-11 |
| cg25599211 | 11 | 74023050  | P4HA3          | 1.145±0.196  | 1.565±0.401  | 7.75E-11 |
| cg17439694 | 3  | 148939523 | CP             | 1.4±0.299    | 0.36±1.019   | 7.81E-11 |
| cg11484576 | 11 | 63272554  | LGALS12        | -0.863±0.283 | -0.074±0.773 | 7.81E-11 |
| cg10673431 | 1  | 152010110 | S100A11        | 4.028±0.334  | 2.254±1.769  | 7.86E-11 |
| cg15209169 | 9  | 125702779 | RABGAP1        | -0.481±0.245 | -0.913±0.398 | 7.93E-11 |
| cg17095279 | 17 | 64225346  | APOH           | 0.7±0.352    | -0.149±0.814 | 7.93E-11 |
| cg18413900 | 12 | 58160989  | CYP27B1        | 0.851±0.207  | 0.249±0.591  | 7.95E-11 |
| cg26390526 | 1  | 152299078 | FLG            | 2.379±0.466  | 1.095±1.258  | 7.95E-11 |
| cg25864727 | 21 | 26803075  | LINC00158      | 1.89±0.397   | 0.892±0.97   | 7.96E-11 |
| cg01581111 | 9  | 125028327 | RBM18          | 1.644±0.295  | 2.091±0.39   | 7.96E-11 |
| cg19353006 | 8  | 15397237  | TUSC3          | 1.809±0.262  | 0.948±0.85   | 7.99E-11 |
| cg05782292 | 11 | 628318    | SCT            | 2.48±0.257   | 1.612±0.858  | 7.99E-11 |
| cg02162069 | 19 | 57352134  | ZIM2           | 1.028±0.185  | 1.561±0.524  | 8.01E-11 |
| cg07434278 | 6  | 32006244  | CYP21A2        | 2.188±0.411  | 1.144±1.017  | 8.07E-11 |
| cg08711674 | 19 | 50381878  | AKT1S1         | 0.23±0.232   | 0.676±0.419  | 8.09E-11 |
| cg19854301 | 16 | 82671450  | CDH13          | 3.254±0.301  | 2.25±0.993   | 8.17E-11 |
| cg03544379 | 19 | 15052824  | OR7C2          | 1.154±0.215  | 0.25±0.9     | 8.18E-11 |
| cg21264055 | 6  | 30523242  | PRR3           | -2.841±0.432 | -1.68±1.137  | 8.33E-11 |
| cg04897683 | 5  | 134871462 | NEUROG1        | -2.586±0.547 | -1.48±1.05   | 8.38E-11 |
| cg24615251 | 17 | 32683481  | CCL13          | 0.821±0.223  | 1.351±0.514  | 8.45E-11 |
| cg05389024 | 2  | 170366131 | KLHL41         | -0.653±0.281 | -0.084±0.535 | 8.58E-11 |
| cg18183281 | 7  | 130132505 | MEST           | 1.1±0.173    | 1.658±0.552  | 8.62E-11 |
| cg12598198 | 11 | 111784386 | HSPB2-C11orf52 | 1.678±0.229  | 2.06±0.348   | 8.68E-11 |
| cg20747455 | 20 | 43933383  | MATN4          | 2.34±0.479   | 2.916±0.419  | 8.74E-11 |
| cg14463304 | 12 | 12965884  | DDX47          | -1.059±0.325 | -1.51±0.378  | 8.76E-11 |
| cg12564962 | 21 | 38377938  | RIPPLY3        | 2.592±0.212  | 2.926±0.298  | 8.81E-11 |
| cg22341104 | 1  | 92952261  | GFI1           | -4.297±0.498 | -2.587±1.697 | 8.86E-11 |
| cg05492113 | 11 | 8060332   | TUB            | 1.534±0.202  | 0.909±0.618  | 8.90E-11 |
| cg24816455 | 3  | 50310766  | SEMA3B         | -0.658±0.302 | -1.643±0.976 | 8.98E-11 |
| cg20555507 | 9  | 73736452  | TRPM3          | -3.193±0.353 | -2.084±1.097 | 9.00E-11 |
| cg23316360 | 13 | 78492916  | EDNRB          | -3.083±0.462 | -2.171±0.866 | 9.00E-11 |
| cg09863772 | 2  | 11886400  | LPIN1          | -2.513±0.244 | -1.873±0.627 | 9.05E-11 |
| cg09462575 | 20 | 43803485  | PI3            | -0.924±0.236 | -1.391±0.443 | 9.11E-11 |
| cg23367478 | 12 | 20521299  | PDE3A          | -5.433±0.539 | -4.318±1.066 | 9.13E-11 |
| cg14120879 | 8  | 7344638   | DEFB105B       | 2.202±0.227  | 1.439±0.758  | 9.15E-11 |

|            |    |           |             |              |              |          |
|------------|----|-----------|-------------|--------------|--------------|----------|
| cg02260587 | 5  | 140474248 | PCDHB2      | -3.212±0.386 | -2.154±1.041 | 9.23E-11 |
| cg07642638 | 20 | 5891786   | CHGB        | -3.033±0.363 | -2.047±0.97  | 9.42E-11 |
| cg23205633 | 17 | 39334352  | KRTAP4-2    | 1.146±0.212  | 1.476±0.294  | 9.48E-11 |
| cg07421682 | 15 | 102030850 | PCSK6       | 3.255±0.297  | 2.546±0.69   | 9.52E-11 |
| cg10037068 | 2  | 175500072 | WIPF1       | 2.158±0.443  | 1.291±0.823  | 9.57E-11 |
| cg01459453 | 1  | 169599212 | SELP        | 0.776±0.292  | 1.467±0.673  | 9.59E-11 |
| cg08331840 | 8  | 36746760  | KCNU1       | 1.955±0.286  | 1.247±0.693  | 9.63E-11 |
| cg25949363 | 17 | 48352008  | TMEM92      | -1.591±0.258 | -2.205±0.599 | 9.64E-11 |
| cg04123409 | 12 | 113841617 | SDS         | -0.753±0.289 | -1.378±0.603 | 9.65E-11 |
| cg13960126 | 19 | 6462999   | CRB3        | 1.308±0.231  | 1.694±0.353  | 9.65E-11 |
| cg03221619 | 19 | 7767348   | FCER2       | 0.349±0.25   | -0.171±0.499 | 9.97E-11 |
| cg23089840 | 21 | 45874886  | LRRC3-AS1   | -2.076±0.361 | -1.067±0.996 | 9.99E-11 |
| cg10358212 | 16 | 81069005  | ATMIN       | 1.426±0.247  | 0.63±0.791   | 1.00E-10 |
| cg04987894 | 1  | 110254616 | GSTM5       | -0.989±0.971 | 0.17±0.84    | 1.00E-10 |
| cg13781408 | 17 | 79095700  | AATK        | 1.723±0.269  | 2.345±0.605  | 1.01E-10 |
| cg12682367 | 13 | 24523698  | ANKRD20A19P | 1.066±0.312  | 0.414±0.627  | 1.01E-10 |
| cg01359534 | 1  | 154293651 | AQP10       | 1.016±0.236  | 1.565±0.535  | 1.02E-10 |
| cg21968796 | 21 | 46358532  | C21orf67    | 1.761±0.312  | 0.935±0.813  | 1.03E-10 |
| cg26626089 | 19 | 54385865  | PRKCG       | -3.247±0.313 | -2.466±0.765 | 1.03E-10 |
| cg06545504 | 4  | 70915792  | HTN1        | 2.188±0.261  | 1.481±0.691  | 1.05E-10 |
| cg27303880 | 1  | 64240188  | ROR1        | -3.801±0.647 | -2.833±0.851 | 1.06E-10 |
| cg02982734 | 15 | 23891048  | MAGEL2      | 1.937±0.293  | 1.257±0.663  | 1.07E-10 |
| cg19464944 | 1  | 149754000 | FCGR1A      | 0.795±0.268  | 0.216±0.559  | 1.07E-10 |
| cg03362494 | 3  | 195938668 | ZDHHC19     | 1.297±0.224  | 0.803±0.479  | 1.07E-10 |
| cg01587454 | 8  | 88886051  | DCAF4L2     | 2.884±0.267  | 2.159±0.716  | 1.09E-10 |
| cg20334738 | 4  | 151502939 | MAB21L2     | 2.563±0.537  | 3.181±0.423  | 1.09E-10 |
| cg18885299 | 19 | 8952874   | MBD3L1      | 0.711±0.294  | 0.244±0.422  | 1.09E-10 |
| cg18962105 | 11 | 66444806  | RBM4B       | -4.707±0.43  | -3.357±1.345 | 1.09E-10 |
| cg02579133 | 21 | 46031741  | KRTAP10-8   | 1.985±0.324  | 1.059±0.918  | 1.10E-10 |
| cg14659547 | 3  | 108476126 | RETNLB      | 1.871±0.301  | 1.044±0.819  | 1.11E-10 |
| cg26149550 | 19 | 51334496  | KLK15       | 1.355±0.296  | 0.634±0.708  | 1.13E-10 |
| cg07127957 | 10 | 75411571  | SYNPO2L     | 1.366±0.222  | 1.781±0.392  | 1.14E-10 |
| cg06912252 | 9  | 104248926 | TMEM246     | -5.076±0.573 | -3.746±1.299 | 1.14E-10 |
| cg06276653 | 8  | 139164635 | FAM135B     | 2.327±0.263  | 1.237±1.096  | 1.16E-10 |
| cg17741572 | 6  | 31914305  | CFB         | 1.735±0.495  | 0.716±0.981  | 1.17E-10 |
| cg22458082 | 15 | 31947546  | OTUD7A      | 2.07±0.281   | 1.526±0.518  | 1.18E-10 |
| cg09163021 | 11 | 47470768  | RAPSN       | 0.881±0.187  | 1.265±0.371  | 1.19E-10 |
| cg21033494 | 10 | 51550114  | MSMB        | 2.338±0.309  | 1.747±0.563  | 1.19E-10 |
| cg07017374 | 13 | 28674451  | FLT3        | -3.938±0.421 | -2.006±1.948 | 1.21E-10 |
| cg25920792 | 10 | 124220729 | HTRA1       | -4.913±0.783 | -3.682±1.111 | 1.22E-10 |
| cg02732509 | 12 | 58241200  | CTDSP2      | -0.932±0.344 | -1.771±0.825 | 1.23E-10 |
| cg23815306 | 5  | 891843    | BRD9        | 0.876±0.16   | 1.173±0.28   | 1.24E-10 |
| cg15028436 | 7  | 37888078  | NME8        | 2.399±0.342  | 1.619±0.763  | 1.24E-10 |
| cg05508558 | 1  | 207627372 | CR2         | -2.266±0.348 | -2.73±0.383  | 1.24E-10 |
| cg13059782 | 9  | 39288689  | CNTNAP3     | -2.506±0.301 | -1.895±0.588 | 1.25E-10 |
| cg16357921 | 9  | 90589634  | CDK20       | -4.476±0.844 | -3.162±1.183 | 1.25E-10 |
| cg04891836 | 19 | 6670390   | TNFSF14     | 0.879±0.33   | 0.185±0.672  | 1.27E-10 |
| cg08450982 | 19 | 41195910  | NUMBL       | 1.027±0.275  | 1.782±0.75   | 1.31E-10 |
| cg17606785 | 14 | 23834808  | EFS         | -2.859±0.352 | -2.019±0.827 | 1.32E-10 |
| cg19692710 | 11 | 73661920  | DNAJB13     | 1.226±0.245  | 0.422±0.806  | 1.33E-10 |
| cg16564824 | 20 | 10199536  | SNAP25      | -4.566±0.341 | -3.1±1.482   | 1.33E-10 |
| cg05779068 | 6  | 29014046  | OR2W1       | 1.363±0.271  | 0.43±0.928   | 1.34E-10 |
| cg00546491 | 7  | 32111062  | PDE1C       | -1.257±0.241 | -0.658±0.591 | 1.35E-10 |
| cg09243021 | 7  | 142985019 | CASP2       | -1.145±0.362 | -0.024±1.122 | 1.35E-10 |
| cg26385286 | 6  | 10527815  | GCNT2       | -0.222±0.269 | 0.377±0.586  | 1.36E-10 |
| cg19674669 | 11 | 134146910 | GLB1L3      | -3.226±0.564 | -2.271±0.888 | 1.36E-10 |
| cg17810944 | 20 | 42876091  | GDAP1L1     | -3.255±0.406 | -1.98±1.277  | 1.36E-10 |
| cg13784557 | 6  | 31430916  | HCP5        | -3.928±0.345 | -4.354±0.329 | 1.37E-10 |
| cg22442090 | 7  | 150434077 | GIMAP5      | -0.047±0.286 | -0.805±0.753 | 1.37E-10 |
| cg23473904 | 21 | 47517690  | COL6A2      | -4.099±0.578 | -2.895±1.167 | 1.37E-10 |
| cg02727285 | 19 | 45504242  | RELB        | -0.926±0.417 | -0.174±0.711 | 1.39E-10 |
| cg17040807 | 17 | 74533282  | CYGB        | -0.589±0.236 | -0.12±0.452  | 1.39E-10 |
| cg07599644 | 11 | 33693866  | KIAA1549L   | 1.506±0.356  | 0.853±0.619  | 1.39E-10 |
| cg05647859 | 12 | 81331718  | LINTA       | -3.217±0.519 | -1.7±1.517   | 1.40E-10 |
| cg04106190 | 7  | 120964168 | WNT16       | 0.271±0.184  | 0.822±0.552  | 1.41E-10 |
| cg25511807 | 11 | 102401438 | MMP7        | -0.276±0.284 | -1.022±0.741 | 1.41E-10 |
| cg17177660 | 4  | 177714456 | VEGFC       | -0.901±0.224 | -0.231±0.671 | 1.43E-10 |
| cg24012708 | 9  | 116138128 | HDHD3       | 0.487±0.555  | -0.308±0.692 | 1.44E-10 |
| cg25928444 | 2  | 220437437 | INHHA       | 1.37±0.25    | 0.997±0.332  | 1.44E-10 |
| cg04338788 | 3  | 52478874  | SEMA3G      | 2.095±0.418  | 2.636±0.441  | 1.45E-10 |

|            |    |           |              |              |              |          |
|------------|----|-----------|--------------|--------------|--------------|----------|
| cg12514620 | 1  | 54871858  | SSBP3        | -4.186±0.529 | -3.282±0.845 | 1.46E-10 |
| cg25163476 | 11 | 2161586   | IGF2-AS      | -3.232±0.351 | -2.106±1.132 | 1.47E-10 |
| cg03742272 | 17 | 7990705   | ALOX12B      | 1.466±0.238  | 0.952±0.502  | 1.47E-10 |
| cg27351358 | 11 | 27743258  | BDNF         | -2.722±0.451 | -1.655±1.053 | 1.47E-10 |
| cg19629292 | 3  | 62358980  | FEZF2        | -4.004±0.412 | -2.767±1.241 | 1.48E-10 |
| cg09212468 | 16 | 57728632  | CCDC135      | -2.451±0.228 | -2.821±0.341 | 1.50E-10 |
| cg20052718 | 7  | 19156902  | TWIST1       | -3.086±0.585 | -1.511±1.571 | 1.50E-10 |
| cg12265829 | 14 | 24804022  | ADCY4        | -3.931±0.433 | -2.383±1.563 | 1.50E-10 |
| cg16792632 | 14 | 64761208  | ESR2         | -5.295±0.453 | -5.888±0.488 | 1.52E-10 |
| cg10874403 | 3  | 87325835  | POU1F1       | 0.305±0.273  | 0.871±0.551  | 1.53E-10 |
| cg06552037 | 2  | 220435838 | OBSL1        | -5.337±0.84  | -4.019±1.2   | 1.54E-10 |
| cg19579782 | 10 | 17243880  | TRDMT1       | -0.65±0.187  | -0.23±0.414  | 1.54E-10 |
| cg09429185 | 17 | 15603481  | ZNF286A      | -3.32±0.469  | -2.429±0.854 | 1.55E-10 |
| cg20884362 | 21 | 46358702  | C21orf67     | 0.914±0.257  | 0.05±0.872   | 1.55E-10 |
| cg11248413 | 5  | 134871658 | NEUROG1      | -3.553±0.639 | -2.252±1.263 | 1.57E-10 |
| cg10478221 | 16 | 679917    | WFIKK1       | 0.359±0.228  | 0.949±0.587  | 1.59E-10 |
| cg00626466 | 12 | 65153982  | GNS          | 0.609±0.263  | -0.206±0.82  | 1.61E-10 |
| cg17031773 | 19 | 51513611  | KLK9         | -0.022±0.314 | -0.626±0.581 | 1.61E-10 |
| cg04943986 | 15 | 96873868  | NR2F2        | -3.879±0.623 | -2.935±0.849 | 1.62E-10 |
| cg06362985 | 12 | 70132208  | RAB3IP       | -1.219±0.219 | -1.616±0.378 | 1.64E-10 |
| cg20768743 | 18 | 67624846  | CD226        | 0.478±0.25   | -0.209±0.689 | 1.66E-10 |
| cg25668626 | 12 | 113343603 | OAS1         | 0.663±0.306  | -0.06±0.716  | 1.67E-10 |
| cg12582008 | 13 | 53603286  | OLFM4        | 2.459±0.315  | 1.5±0.966    | 1.67E-10 |
| cg11846956 | 19 | 51520382  | KLK10        | -3.177±0.54  | -1.892±1.273 | 1.67E-10 |
| cg16176600 | 6  | 116381609 | FRK          | -0.578±0.31  | -1.266±0.677 | 1.67E-10 |
| cg21554552 | 3  | 50378425  | RASSF1       | -4.698±0.771 | -2.511±2.195 | 1.67E-10 |
| cg02170525 | 2  | 87018382  | CD8A         | -2.989±0.294 | -2.223±0.764 | 1.68E-10 |
| cg26195812 | 2  | 27071332  | DPYSL5       | -3.948±0.554 | -2.472±1.477 | 1.71E-10 |
| cg23003832 | 9  | 131486918 | LOC100506100 | -2.375±0.416 | -2.929±0.464 | 1.73E-10 |
| cg25341653 | 16 | 67233277  | ELMO3        | 1.629±0.307  | 0.976±0.64   | 1.73E-10 |
| cg13030582 | 17 | 19290708  | MFAP4        | -1.191±0.327 | -0.526±0.648 | 1.73E-10 |
| cg21716693 | 6  | 36806882  | CPNE5        | -0.392±0.27  | 0.313±0.706  | 1.76E-10 |
| cg07888234 | 18 | 59992252  | TNFRSF11A    | -3±0.365     | -3.562±0.51  | 1.76E-10 |
| cg11698653 | 4  | 177190191 | ASB5         | 1.262±0.286  | 0.333±0.931  | 1.79E-10 |
| cg12799895 | 7  | 98246652  | NPTX2        | -1.589±0.65  | -0.544±0.965 | 1.80E-10 |
| cg19402885 | 12 | 15475236  | PTPRO        | -3.285±0.439 | -2.197±1.085 | 1.80E-10 |
| cg02364642 | 12 | 58005758  | ARHGEF25     | -2.446±0.389 | -1.642±0.787 | 1.85E-10 |
| cg18938204 | 20 | 39994857  | EMILIN3      | -3.054±0.432 | -2.048±0.999 | 1.86E-10 |
| cg25784308 | 2  | 131513216 | AMER3        | -2.883±0.334 | -1.826±1.07  | 1.88E-10 |
| cg24849648 | 7  | 120964019 | WNT16        | -1.251±0.3   | -0.481±0.771 | 1.88E-10 |
| cg18489434 | 14 | 77228510  | VASH1        | -5.756±0.5   | -4.163±1.614 | 1.88E-10 |
| cg06200697 | 11 | 57528838  | CTNND1       | -1.248±0.346 | -0.569±0.659 | 1.89E-10 |
| cg10081899 | 22 | 22307482  | PPM1F        | -4.575±0.389 | -5.169±0.538 | 1.89E-10 |
| cg26926521 | 10 | 112837240 | ADRA2A       | -4.739±0.657 | -3.431±1.273 | 1.90E-10 |
| cg10942056 | 1  | 223101848 | DISP1        | -0.753±0.416 | 0.415±1.177  | 1.92E-10 |
| cg27168844 | 6  | 52051317  | IL17A        | 1.982±0.333  | 1.152±0.831  | 1.92E-10 |
| cg13878456 | 17 | 38020344  | IKZF3        | -1.746±0.254 | -2.043±0.218 | 1.93E-10 |
| cg03586879 | 16 | 6068831   | RBFOX1       | -3.91±0.463  | -3.073±0.801 | 1.95E-10 |
| cg12391783 | 16 | 27269148  | NSMCE1       | 1.438±0.167  | 1.748±0.298  | 1.98E-10 |
| cg24993443 | 15 | 25123549  | SNRPN        | 0.625±0.336  | 1.414±0.785  | 1.98E-10 |
| cg04828792 | 21 | 42733433  | MX2          | 2.61±0.197   | 1.999±0.62   | 2.03E-10 |
| cg04000821 | 19 | 55014066  | LAIR2        | -0.884±0.325 | -1.554±0.658 | 2.04E-10 |
| cg18364088 | 3  | 123676909 | CCDC14       | 1.073±0.304  | 1.49±0.355   | 2.04E-10 |
| cg23323671 | 1  | 26233623  | STMN1        | -0.136±0.28  | -0.838±0.703 | 2.04E-10 |
| cg03240509 | 12 | 4918169   | KCNA6        | -0.862±0.365 | -0.147±0.697 | 2.04E-10 |
| cg16878021 | 14 | 106209463 | 0            | 4.421±0.371  | 3.647±0.762  | 2.06E-10 |
| cg22445920 | 5  | 150683178 | SLC36A3      | 2.575±0.19   | 1.847±0.744  | 2.06E-10 |
| cg09155001 | 10 | 105218401 | CALHM1       | 2.759±0.333  | 2.297±0.402  | 2.06E-10 |
| cg08598221 | 8  | 121824929 | SNTB1        | -0.017±0.296 | -0.828±0.818 | 2.07E-10 |
| cg19461644 | 9  | 101706617 | COL15A1      | -3.614±0.38  | -2.447±1.184 | 2.07E-10 |
| cg02212280 | 11 | 102670192 | MMP1         | 1.53±0.383   | 2.062±0.463  | 2.07E-10 |
| cg27546237 | 13 | 110960452 | COL4A2       | -3.276±0.416 | -2.46±0.795  | 2.08E-10 |
| cg24995381 | 7  | 37780156  | GPR141       | 3.252±0.207  | 2.142±1.14   | 2.08E-10 |
| cg10709021 | 8  | 30890108  | PURG         | -1.678±0.328 | -0.77±0.917  | 2.09E-10 |
| cg19836199 | 21 | 36421941  | RUNX1        | -0.276±0.341 | -1.486±1.222 | 2.10E-10 |
| cg05105913 | 17 | 48422990  | XYLT2        | -0.574±0.191 | -1.06±0.489  | 2.10E-10 |
| cg09017174 | 11 | 35440525  | SLC1A2       | -2.796±0.633 | -3.572±0.611 | 2.10E-10 |
| cg11877382 | 12 | 129338939 | GLT1D1       | -2.607±0.328 | -1.948±0.645 | 2.11E-10 |
| cg09426307 | 22 | 30868048  | SEC14L3      | -0.036±0.185 | -0.54±0.508  | 2.11E-10 |
| cg25381844 | 15 | 84116340  | SH3GL3       | -4.417±0.487 | -3.276±1.138 | 2.12E-10 |

|            |    |           |           |              |              |          |
|------------|----|-----------|-----------|--------------|--------------|----------|
| cg05839235 | 5  | 32712237  | NPR3      | -3.225±0.534 | -2.08±1.131  | 2.13E-10 |
| cg27584171 | 15 | 49338887  | SECISBP2L | -4.72±0.435  | -5.351±0.562 | 2.15E-10 |
| cg05871136 | 10 | 72971961  | UNC5B     | -3.999±0.346 | -3.433±0.529 | 2.15E-10 |
| cg01934790 | 16 | 756400    | FBXL16    | -3.499±0.324 | -2.476±1.041 | 2.17E-10 |
| cg15731815 | 1  | 6269260   | RNF207    | -0.507±0.308 | 0.43±0.951   | 2.18E-10 |
| cg04764624 | 17 | 29718129  | RAB11FIP4 | -2.426±0.352 | -1.746±0.662 | 2.23E-10 |
| cg07337598 | 1  | 150953943 | ANXA9     | 0.626±0.193  | -0.029±0.669 | 2.24E-10 |
| cg13118849 | 19 | 19327542  | NCAN      | 2.656±0.228  | 1.797±0.88   | 2.25E-10 |
| cg11835355 | 22 | 36561746  | APOL3     | 1.921±0.374  | 2.5±0.533    | 2.26E-10 |
| cg01033938 | 11 | 130298880 | ADAMTS8   | -3.043±0.282 | -2.141±0.919 | 2.29E-10 |
| cg04384208 | 1  | 161519396 | FCGR3A    | 0.836±0.402  | 0.068±0.747  | 2.29E-10 |
| cg08099701 | 15 | 27160007  | GABRA5    | 1.628±0.328  | 0.882±0.738  | 2.30E-10 |
| cg15590780 | 1  | 216596639 | USH2A     | -0.594±0.27  | -1.293±0.705 | 2.30E-10 |
| cg11498156 | 10 | 102890145 | TLX1NB    | -0.957±0.28  | -0.278±0.675 | 2.31E-10 |
| cg05559445 | 11 | 2907674   | CDKN1C    | -1.144±0.31  | -0.507±0.627 | 2.32E-10 |
| cg05245861 | 18 | 31020511  | CCDC178   | -3.412±0.361 | -2.412±1.012 | 2.32E-10 |
| cg13149307 | 10 | 20104452  | PLXDC2    | -3.797±0.432 | -2.918±0.865 | 2.34E-10 |
| cg21972382 | 2  | 29339076  | CLIP4     | -3.578±0.457 | -4.165±0.485 | 2.34E-10 |
| cg05769169 | 14 | 34419832  | EGLN3     | -4.343±0.515 | -3.047±1.306 | 2.38E-10 |
| cg27416067 | 1  | 67773128  | IL12RB2   | -4.383±0.341 | -3.086±1.331 | 2.40E-10 |
| cg21023770 | 20 | 44517227  | SPATA25   | 0.563±0.23   | 1.068±0.502  | 2.40E-10 |
| cg12294121 | 4  | 47033575  | GABRB1    | -3.791±0.432 | -2.622±1.184 | 2.41E-10 |
| cg01161611 | 2  | 154801634 | GALNT13   | 1.988±0.295  | 1.301±0.682  | 2.43E-10 |
| cg04609859 | 17 | 46655736  | HOXB4     | -4.455±1.079 | -2.521±1.861 | 2.44E-10 |
| cg16692277 | 13 | 51640948  | GUCY1B2   | -1.224±0.286 | -2.026±0.815 | 2.45E-10 |
| cg11344614 | 21 | 27010160  | JAM2      | 1.697±0.375  | 0.789±0.914  | 2.48E-10 |
| cg05142576 | 6  | 27114781  | HIST1H2AH | -3.472±0.63  | -4.22±0.573  | 2.49E-10 |
| cg02805028 | 16 | 27899239  | GSG1L     | 0.386±0.242  | 0.87±0.476   | 2.50E-10 |
| cg22809047 | 2  | 101618261 | RPL31     | -0.232±0.322 | 0.669±0.915  | 2.52E-10 |
| cg22229142 | 22 | 37447306  | KCTD17    | 0.248±0.198  | -0.193±0.44  | 2.52E-10 |
| cg09191327 | 9  | 133540108 | PRDM12    | -4.973±0.42  | -3.649±1.354 | 2.52E-10 |
| cg13144783 | 3  | 46249795  | CCR1      | -0.076±0.279 | -0.787±0.719 | 2.57E-10 |
| cg17279839 | 7  | 150038598 | RARRES2   | -1.928±0.533 | -1.195±0.639 | 2.58E-10 |
| cg27412093 | 1  | 230882387 | CAPN9     | 1.54±0.238   | 2.057±0.514  | 2.60E-10 |
| cg03099771 | 6  | 27215365  | PRSS16    | -0.388±0.314 | 0.437±0.836  | 2.60E-10 |
| cg18353563 | 3  | 127390935 | ABTB1     | -2.162±0.54  | -2.988±0.76  | 2.63E-10 |
| cg18453621 | 9  | 129376904 | LMXB1     | -4.685±0.76  | -3.394±1.23  | 2.68E-10 |
| cg17880199 | 16 | 15950840  | MYH11     | -4.936±0.406 | -3.577±1.396 | 2.69E-10 |
| cg12624641 | 14 | 90420569  | EFCAB11   | -1.262±0.257 | -0.487±0.792 | 2.70E-10 |
| cg07136161 | 9  | 105758091 | CYLC2     | 1.561±0.321  | 0.765±0.797  | 2.72E-10 |
| cg17663463 | 19 | 57349709  | PEG3      | 0.841±0.213  | 1.379±0.544  | 2.72E-10 |
| cg08116137 | 2  | 73870653  | NAT8      | -2.025±0.3   | -1.153±0.891 | 2.72E-10 |
| cg04481779 | 6  | 137366125 | IL20RA    | -1.33±0.213  | -1.985±0.671 | 2.74E-10 |
| cg14820573 | 16 | 102121    | POLR3K    | 2.992±0.31   | 2.118±0.891  | 2.77E-10 |
| cg25985778 | 17 | 72199373  | RPL38     | -3.58±0.303  | -3.979±0.339 | 2.77E-10 |
| cg16558203 | 3  | 38347392  | SLC22A14  | 1.186±0.24   | 1.599±0.396  | 2.77E-10 |
| cg07657776 | 12 | 109914065 | KCTD10    | 0.785±0.2    | 1.144±0.348  | 2.78E-10 |
| cg25249068 | 3  | 133118940 | BFSP2     | 1.495±0.204  | 1.059±0.435  | 2.78E-10 |
| cg00540769 | 5  | 80689492  | ACOT12    | -1.278±0.3   | -0.412±0.884 | 2.79E-10 |
| cg08446111 | 16 | 48279428  | LONP2     | -0.613±0.328 | 0.061±0.667  | 2.81E-10 |
| cg19593572 | 16 | 22308486  | POLR3E    | -3.553±0.71  | -2.636±0.768 | 2.81E-10 |
| cg09952204 | 5  | 80256664  | RASGRF2   | -4.549±0.963 | -3±1.456     | 2.84E-10 |
| cg00971396 | 3  | 184081400 | POLR2H    | -4.837±0.379 | -5.309±0.384 | 2.88E-10 |
| cg11126134 | 13 | 31480304  | MEDAG     | -3.22±0.685  | -1.6±1.634   | 2.88E-10 |
| cg03548857 | 19 | 35940174  | FFAR2     | -0.764±0.291 | -1.373±0.606 | 2.92E-10 |
| cg11384427 | 12 | 6553585   | CD27      | 2.072±0.253  | 1.425±0.657  | 2.94E-10 |
| cg16792800 | 13 | 93879361  | GPC6      | -2.56±0.369  | -1.873±0.672 | 2.94E-10 |
| cg05498681 | 20 | 35973318  | SRC       | 1.633±0.269  | 0.752±0.906  | 2.96E-10 |
| cg14614211 | 10 | 28034247  | MKX       | -2.776±0.43  | -1.682±1.112 | 3.02E-10 |
| cg12128839 | 7  | 27183436  | HOXA5     | -2.2±0.53    | -1.113±1.08  | 3.04E-10 |
| cg10777851 | 3  | 112051808 | CD200     | -4.033±0.316 | -2.813±1.263 | 3.04E-10 |
| cg00240312 | 16 | 68771514  | CDH1      | -3.918±0.668 | -2.995±0.815 | 3.05E-10 |
| cg23033024 | 20 | 23472484  | CST8      | 2.489±0.195  | 1.943±0.558  | 3.07E-10 |
| cg15149938 | 22 | 50018392  | C22orf34  | 0.878±0.278  | -0.002±0.906 | 3.12E-10 |
| cg13255629 | 4  | 88752660  | MEPE      | 2.421±0.33   | 1.855±0.544  | 3.13E-10 |
| cg13991233 | 17 | 10102558  | GAS7      | -3.497±0.405 | -2.443±1.074 | 3.14E-10 |
| cg12081743 | 7  | 18535499  | HDAC9     | -2.909±0.345 | -1.435±1.529 | 3.14E-10 |
| cg15988792 | 20 | 25039314  | ACSS1     | -3.188±0.535 | -1.785±1.43  | 3.14E-10 |
| cg27378216 | 18 | 42281171  | SETBP1    | 2.353±0.274  | 1.368±1.018  | 3.14E-10 |
| cg08933517 | 14 | 104436057 | TDRD9     | 0.766±0.277  | 1.308±0.53   | 3.16E-10 |

|            |    |           |                  |              |              |          |
|------------|----|-----------|------------------|--------------|--------------|----------|
| cg18752854 | 2  | 218809254 | <i>TNS1</i>      | 0.547±0.203  | 1.037±0.496  | 3.24E-10 |
| cg24751129 | 6  | 42928920  | <i>GNMT</i>      | 1.277±0.304  | 0.397±0.903  | 3.26E-10 |
| cg20339650 | 11 | 2160882   | <i>IGF2</i>      | -2.443±0.371 | -1.563±0.892 | 3.27E-10 |
| cg17460386 | 1  | 207095668 | <i>FAIM3</i>     | -0.14±0.273  | -0.795±0.664 | 3.27E-10 |
| cg20684549 | 19 | 822842    | <i>LPPR3</i>     | -0.149±0.255 | 0.508±0.67   | 3.28E-10 |
| cg23855392 | 15 | 80189782  | <i>MTHFS</i>     | -3.299±0.613 | -4.044±0.595 | 3.33E-10 |
| cg14607011 | 10 | 135171746 | <i>FUOM</i>      | 1.953±0.337  | 2.539±0.567  | 3.33E-10 |
| cg12539975 | 9  | 133539583 | <i>PRDM12</i>    | -3.498±0.444 | -2.538±0.963 | 3.40E-10 |
| cg10414058 | 5  | 141017903 | <i>RELL2</i>     | -2.741±0.419 | -1.853±0.89  | 3.42E-10 |
| cg09076584 | 17 | 26941253  | <i>SGK494</i>    | 1.921±0.289  | 2.382±0.434  | 3.44E-10 |
| cg21688264 | 6  | 84418724  | <i>SNAP91</i>    | -4.585±0.828 | -3.018±1.542 | 3.45E-10 |
| cg08906015 | 19 | 47157825  | <i>DACT3</i>     | 0.131±0.29   | 0.624±0.474  | 3.52E-10 |
| cg00107187 | 14 | 105070998 | <i>TMEM179</i>   | -1.709±0.344 | -0.819±0.91  | 3.60E-10 |
| cg03963654 | 4  | 141177084 | <i>SCOC</i>      | 3.107±0.251  | 2.723±0.358  | 3.63E-10 |
| cg19439399 | 6  | 80656595  | <i>ELOVL4</i>    | -3.107±0.219 | -2.114±1.036 | 3.63E-10 |
| cg23129478 | 18 | 44337922  | <i>ST8SIA5</i>   | -4.411±0.58  | -3.217±1.194 | 3.63E-10 |
| cg22646710 | 1  | 114696798 | <i>SYT6</i>      | -4.38±0.486  | -3.448±0.922 | 3.66E-10 |
| cg13694867 | 21 | 38072100  | <i>SIM2</i>      | -4.412±0.684 | -3.048±1.358 | 3.67E-10 |
| cg13605690 | 2  | 169746671 | <i>SPC25</i>     | -3.824±1.052 | -4.912±0.632 | 3.67E-10 |
| cg00953256 | 11 | 69468875  | <i>CCND1</i>     | 1.576±0.254  | 0.853±0.744  | 3.69E-10 |
| cg18871276 | 14 | 60386030  | <i>LRRC9</i>     | -3.737±0.369 | -2.273±1.525 | 3.70E-10 |
| cg13920529 | 9  | 33402426  | <i>AQP7</i>      | 2.429±0.245  | 2.732±0.247  | 3.70E-10 |
| cg18275051 | 1  | 202937114 | <i>CYBR51</i>    | -3.001±0.51  | -1.919±1.087 | 3.72E-10 |
| cg23152755 | 8  | 7346035   | <i>DEFB105B</i>  | 0.73±0.223   | 0.116±0.625  | 3.73E-10 |
| cg15006973 | 1  | 35258933  | <i>GJA4</i>      | 1.386±0.333  | 2.171±0.799  | 3.76E-10 |
| cg17625032 | 16 | 57054740  | <i>NLRC5</i>     | 0.493±0.232  | 0.954±0.459  | 3.82E-10 |
| cg09750183 | 11 | 61008109  | <i>PGA5</i>      | 2.018±0.341  | 2.761±0.749  | 3.84E-10 |
| cg13784855 | 8  | 128806938 | <i>MIR1204</i>   | -3.954±0.347 | -4.578±0.61  | 3.84E-10 |
| cg20839025 | 21 | 19776616  | <i>TMPRSS15</i>  | -0.481±0.199 | -1.052±0.584 | 3.86E-10 |
| cg23841186 | 12 | 53492662  | <i>IGFBP6</i>    | -0.095±0.265 | 0.608±0.722  | 3.87E-10 |
| cg12058490 | 12 | 9268379   | <i>A2M</i>       | -0.272±0.342 | 0.466±0.737  | 3.89E-10 |
| cg24949049 | 13 | 61013241  | <i>TDRD3</i>     | 2.462±0.204  | 1.551±0.953  | 3.93E-10 |
| cg08961832 | 11 | 279185    | <i>NLRP6</i>     | -0.815±0.257 | -0.273±0.546 | 3.97E-10 |
| cg07259382 | 4  | 164536228 | <i>42430</i>     | 2.406±0.376  | 1.365±1.073  | 3.97E-10 |
| cg27133864 | 6  | 26216541  | <i>HIST1H2BG</i> | -3.344±0.536 | -2.097±1.269 | 3.98E-10 |
| cg16112945 | 9  | 136285806 | <i>ADAMTS13</i>  | 1.165±0.329  | 0.443±0.73   | 4.04E-10 |
| cg06862644 | 17 | 3375469   | <i>SPATA22</i>   | 2.614±0.32   | 1.888±0.737  | 4.05E-10 |
| cg05989054 | 19 | 1402626   | <i>GAMT</i>      | 0.941±0.353  | 0.209±0.735  | 4.07E-10 |
| cg06154597 | 4  | 924812    | <i>GAK</i>       | 0.557±0.186  | -0.085±0.669 | 4.07E-10 |
| cg24237576 | 16 | 2285775   | <i>DNASE1L2</i>  | 1.951±0.316  | 1.291±0.664  | 4.11E-10 |
| cg21416237 | 17 | 39970091  | <i>FKBP10</i>    | 2.001±0.298  | 2.565±0.559  | 4.11E-10 |
| cg06882926 | 17 | 3031354   | <i>OR1G1</i>     | 0.875±0.382  | 0.215±0.641  | 4.13E-10 |
| cg15183083 | 11 | 30038310  | <i>KCNA4</i>     | -2.545±0.318 | -1.872±0.678 | 4.14E-10 |
| cg24834740 | 20 | 37434552  | <i>PPP1R16B</i>  | -5.104±0.415 | -3.66±1.505  | 4.16E-10 |
| cg13514050 | 20 | 33460585  | <i>GGT7</i>      | -4.356±0.375 | -4.96±0.577  | 4.16E-10 |
| cg04527918 | 2  | 27531170  | <i>UCN</i>       | 0.195±0.321  | 0.991±0.815  | 4.17E-10 |
| cg06537230 | 7  | 96653183  | <i>DLX5</i>      | -1.838±0.216 | -1.147±0.718 | 4.18E-10 |
| cg12530021 | 19 | 52004630  | <i>SIGLEC12</i>  | -0.179±0.222 | -0.89±0.739  | 4.19E-10 |
| cg19690404 | 7  | 129933646 | <i>CPA4</i>      | 0.267±0.307  | -0.571±0.855 | 4.21E-10 |
| cg15901783 | 13 | 77461426  | <i>KCTD12</i>    | -0.696±0.291 | -0.046±0.66  | 4.30E-10 |
| cg13756879 | 11 | 2161473   | <i>IGF2-AS</i>   | -5.228±0.657 | -3.889±1.345 | 4.32E-10 |
| cg20661303 | 1  | 226129561 | <i>LEFTY2</i>    | -0.316±0.224 | 0.028±0.614  | 4.34E-10 |
| cg15125472 | 19 | 36248077  | <i>HSPB6</i>     | -1.751±0.352 | -1.09±0.656  | 4.35E-10 |
| cg15526708 | 9  | 101866433 | <i>TGFBF1</i>    | -3.208±0.531 | -2.449±0.691 | 4.35E-10 |
| cg19712821 | 4  | 15965016  | <i>FGFBP2</i>    | -0.603±0.3   | -1.331±0.746 | 4.37E-10 |
| cg12555334 | 7  | 56120290  | <i>CCT6A</i>     | -0.895±0.309 | -1.474±0.574 | 4.38E-10 |
| cg14399656 | 19 | 37179536  | <i>ZNF567</i>    | 1.403±0.238  | 1.104±0.25   | 4.44E-10 |
| cg11738543 | 12 | 93967225  | <i>SOCS2</i>     | -2.074±0.422 | -0.909±1.204 | 4.47E-10 |
| cg09630404 | 8  | 38008543  | <i>STAR</i>      | -4.339±0.473 | -3.438±0.896 | 4.50E-10 |
| cg13083810 | 6  | 31139156  | <i>POU5F1</i>    | 2.954±0.171  | 2.642±0.308  | 4.51E-10 |
| cg26776077 | 9  | 65493891  | <i>FAM74A4</i>   | 2.102±0.284  | 1.414±0.705  | 4.52E-10 |
| cg05159732 | 17 | 40337534  | <i>HCRT</i>      | 1.642±0.197  | 2.029±0.388  | 4.52E-10 |
| cg19403023 | 16 | 2848797   | <i>PRSS41</i>    | 0.581±0.612  | 1.347±0.642  | 4.53E-10 |
| cg21949781 | 18 | 43652366  | <i>PSTPIP2</i>   | -4.596±0.591 | -3.775±0.739 | 4.54E-10 |
| cg11668923 | 10 | 128076936 | <i>ADAM12</i>    | -3.305±0.618 | -2.15±1.146  | 4.54E-10 |
| cg15238224 | 6  | 30081408  | <i>TRIM31</i>    | 0.334±0.31   | -0.424±0.778 | 4.57E-10 |
| cg26153631 | 12 | 54379056  | <i>HOXC10</i>    | -0.952±0.141 | -0.193±0.799 | 4.59E-10 |
| cg03609102 | 11 | 1244533   | <i>MUC5B</i>     | 0.043±0.164  | -0.485±0.551 | 4.60E-10 |
| cg19282452 | 19 | 19855831  | <i>0</i>         | 1.056±0.268  | 0.454±0.614  | 4.62E-10 |
| cg09214254 | 6  | 168841455 | <i>SMOC2</i>     | -2.649±0.314 | -1.798±0.88  | 4.65E-10 |



|            |    |           |           |              |              |          |
|------------|----|-----------|-----------|--------------|--------------|----------|
| cg25426302 | 6  | 32120826  | PPT2      | 0.275±0.274  | -0.434±0.74  | 6.76E-10 |
| cg06546607 | 19 | 34013019  | PEPD      | -3.696±0.492 | -2.547±1.19  | 6.82E-10 |
| cg19857541 | 3  | 108836800 | MORC1     | 3.925±0.295  | 2.834±1.158  | 6.84E-10 |
| cg08397758 | 10 | 100174853 | PYROXD2   | -3.577±0.555 | -2.794±0.724 | 6.96E-10 |
| cg20324165 | 12 | 53299145  | KRT8      | -0.123±0.196 | -0.806±0.724 | 7.06E-10 |
| cg22870280 | 15 | 52404029  | BCL2L10   | 2.937±0.182  | 2.632±0.3    | 7.09E-10 |
| cg24975564 | 12 | 20522236  | PDE3A     | -5.057±0.636 | -4.032±0.997 | 7.10E-10 |
| cg26656135 | 6  | 133562774 | EYA4      | -4.098±0.745 | -2.47±1.678  | 7.15E-10 |
| cg23557926 | 1  | 196620963 | CFH       | -2.358±0.45  | -3.156±0.796 | 7.22E-10 |
| cg08823182 | 1  | 153514482 | S100A5    | -0.468±0.335 | 0.058±0.507  | 7.23E-10 |
| cg13858139 | 19 | 22019044  | ZNF43     | -3.22±0.358  | -2.638±0.568 | 7.25E-10 |
| cg19875656 | 3  | 46759096  | PRSS50    | 2.522±0.456  | 3.104±0.508  | 7.29E-10 |
| cg25956985 | 22 | 39795188  | TAB1      | 0.206±0.301  | -0.348±0.558 | 7.32E-10 |
| cg24477636 | 19 | 15919005  | OR10H1    | 1.727±0.6    | 0.742±0.965  | 7.45E-10 |
| cg09473585 | 3  | 62305519  | C3orf14   | 1.9±0.342    | 1.041±0.898  | 7.45E-10 |
| cg10303842 | 5  | 22853730  | CDH12     | -2.699±0.297 | -1.76±0.994  | 7.47E-10 |
| cg04127255 | 19 | 43588055  | PSG2      | 3.321±0.175  | 2.799±0.551  | 7.48E-10 |
| cg22975913 | 11 | 32457727  | WT1-AS    | -3.112±0.48  | -2.096±1.046 | 7.53E-10 |
| cg03349953 | 5  | 140515207 | PCDHB5    | -2.504±0.497 | -1.522±1     | 7.54E-10 |
| cg13697378 | 1  | 68512845  | DIRAS3    | 1.089±0.24   | 1.656±0.591  | 7.64E-10 |
| cg26545162 | 17 | 74075092  | ZACN      | 0.233±0.276  | -0.517±0.789 | 7.67E-10 |
| cg04915566 | 21 | 36421472  | RUNX1     | 0.515±0.424  | -0.81±1.403  | 7.68E-10 |
| cg23696618 | 18 | 61583699  | SERPINB10 | 0.603±0.25   | -0.084±0.717 | 7.71E-10 |
| cg26136776 | 19 | 12998426  | KLF1      | 1.951±0.287  | 2.511±0.571  | 7.72E-10 |
| cg13490971 | 5  | 141488121 | NDFIP1    | -3.177±0.312 | -3.579±0.354 | 7.73E-10 |
| cg04283938 | 22 | 42373298  | 42616     | -3.257±0.39  | -2.537±0.727 | 7.85E-10 |
| cg24056567 | 8  | 18871909  | PSD3      | -1.342±0.247 | -1.814±0.479 | 7.90E-10 |
| cg18354594 | 1  | 247276647 | C1orf229  | 1.033±0.248  | 0.299±0.777  | 7.93E-10 |
| cg01421985 | 15 | 31947534  | OTUD7A    | 2.979±0.22   | 2.401±0.608  | 7.95E-10 |
| cg19928450 | 12 | 54348629  | HOXC12    | -2.289±0.281 | -1.676±0.633 | 8.00E-10 |
| cg06577725 | 3  | 172858917 | SPATA16   | 1.376±0.256  | 0.503±0.929  | 8.00E-10 |
| cg12588301 | 1  | 152487335 | CRCT1     | 1.121±0.192  | 0.474±0.688  | 8.05E-10 |
| cg27096144 | 5  | 174151779 | MSX2      | -2.505±0.742 | -1.52±0.887  | 8.12E-10 |
| cg06656924 | 6  | 35228319  | ZNF76     | -1.683±0.314 | -0.996±0.712 | 8.16E-10 |
| cg16264526 | 4  | 148401273 | EDNRA     | -1.322±0.305 | -1.85±0.526  | 8.32E-10 |
| cg03891191 | 1  | 12916998  | PRAMEF2   | 1.193±0.228  | 0.416±0.828  | 8.34E-10 |
| cg08587864 | 1  | 172413612 | PIGC      | -1.509±0.314 | -2.085±0.582 | 8.38E-10 |
| cg18807515 | 1  | 12916315  | PRAMEF2   | 1.356±0.197  | 0.498±0.92   | 8.44E-10 |
| cg17542385 | 1  | 152681979 | 0         | 0.715±0.4    | -0.24±0.998  | 8.45E-10 |
| cg04270835 | 11 | 22359188  | SLC17A6   | -3.761±0.417 | -2.834±0.962 | 8.52E-10 |
| cg13316424 | 9  | 130968009 | CIZ1      | 1.923±0.158  | 1.322±0.643  | 8.56E-10 |
| cg07017706 | 12 | 53013331  | KRT73     | 1.888±0.159  | 1.379±0.542  | 8.57E-10 |
| cg16777782 | 16 | 82671333  | CDH13     | 4.212±0.313  | 3.112±1.175  | 8.58E-10 |
| cg01765641 | 3  | 17781888  | TBC1D5    | 1.07±0.262   | 0.259±0.862  | 8.63E-10 |
| cg22585988 | 1  | 161059327 | PVRL4     | 0.741±0.23   | 0.101±0.677  | 8.65E-10 |
| cg13789236 | 9  | 79009433  | RFK       | -3.949±0.593 | -3.275±0.529 | 8.68E-10 |
| cg14225485 | 2  | 14772568  | FAM84A    | -3.951±0.68  | -2.663±1.311 | 8.69E-10 |
| cg25947945 | 1  | 201368946 | LAD1      | -1.116±0.269 | -1.703±0.61  | 8.71E-10 |
| cg09196942 | 1  | 12851619  | PRAMEF1   | 1.134±0.414  | 0.434±0.696  | 8.76E-10 |
| cg25400358 | 11 | 64054159  | GPR137    | 1.376±0.187  | 0.908±0.492  | 8.80E-10 |
| cg13202751 | 5  | 1446443   | SLC6A3    | -1.656±0.272 | -1.023±0.662 | 8.83E-10 |
| cg22719623 | 6  | 154360732 | OPRM1     | -0.846±0.242 | -0.106±0.787 | 8.88E-10 |
| cg21902544 | 18 | 70211515  | CBLN2     | -3.501±0.407 | -2.381±1.185 | 8.94E-10 |
| cg08047457 | 3  | 50378413  | RASSF1    | -4.589±0.912 | -2.134±2.595 | 8.97E-10 |
| cg19298821 | 5  | 125967357 | C5orf48   | 2.612±0.257  | 1.896±0.758  | 8.98E-10 |
| cg11299964 | 9  | 128469783 | MAPKAP1   | -2.562±0.3   | -2.988±0.399 | 9.01E-10 |
| cg06386517 | 7  | 50860866  | GRB10     | -5.056±0.776 | -3.81±1.223  | 9.09E-10 |
| cg07686479 | 1  | 165325030 | LMX1A     | -3.615±0.497 | -2.614±1.03  | 9.13E-10 |
| cg26550234 | 10 | 18239793  | SLC39A12  | 1.959±0.464  | 0.94±1.061   | 9.21E-10 |
| cg08321346 | 2  | 241496983 | ANKMY1    | -1.156±0.534 | -0.204±0.961 | 9.30E-10 |
| cg20322977 | 10 | 94821085  | CYP26C1   | 0.11±0.14    | 0.497±0.41   | 9.40E-10 |
| cg20950011 | 18 | 12254377  | CIDEA     | -3.406±0.487 | -2.401±1.039 | 9.46E-10 |
| cg19014419 | 5  | 150284504 | ZNF300    | -1.777±0.35  | -0.98±0.834  | 9.57E-10 |
| cg14385738 | 1  | 114414340 | PTPN22    | 0.739±0.371  | -0.41±1.226  | 9.58E-10 |
| cg24816298 | 11 | 13519025  | PTH       | 1.487±0.236  | 0.761±0.774  | 9.58E-10 |
| cg22199080 | 12 | 58135833  | AGAP2     | -1.721±0.34  | -2.444±0.75  | 9.59E-10 |
| cg24340657 | 17 | 38859934  | KRT24     | 1.752±0.236  | 2.183±0.437  | 9.63E-10 |
| cg12748258 | 8  | 21988173  | HR        | -4.878±0.552 | -3.458±1.5   | 9.66E-10 |
| cg26861460 | 22 | 44575455  | PARVG     | -0.598±0.306 | 0.06±0.684   | 9.69E-10 |
| cg14003512 | 2  | 88047546  | PLGLB2    | 0.405±0.154  | -0.048±0.483 | 9.79E-10 |

|            |    |           |              |              |              |          |
|------------|----|-----------|--------------|--------------|--------------|----------|
| cg15761405 | 1  | 157746405 | FCRL2        | 0.771±0.277  | -0.068±0.895 | 9.88E-10 |
| cg21685427 | 20 | 42187356  | SGK2         | 1.526±0.293  | 0.702±0.876  | 9.94E-10 |
| cg09207718 | 15 | 75041386  | CYP1A2       | 2.336±0.342  | 1.612±0.752  | 1.00E-09 |
| cg18412984 | 14 | 102604722 | HSP90AA1     | 1.036±0.451  | 1.606±0.464  | 1.00E-09 |
| cg15534366 | 20 | 59826207  | CDH4         | 0.196±0.297  | 1.041±0.9    | 1.00E-09 |
| cg13344740 | 7  | 96654132  | DLX5         | -1.602±0.325 | -0.815±0.829 | 1.01E-09 |
| cg18152830 | 17 | 16875129  | TNFRSF13B    | 2.776±0.308  | 2.195±0.593  | 1.01E-09 |
| cg12613383 | 1  | 242688681 | PLD5         | -2.409±0.295 | -1.695±0.752 | 1.02E-09 |
| cg23219570 | 12 | 4488893   | FGF23        | -2.409±0.495 | -1.527±0.893 | 1.02E-09 |
| cg24562819 | 20 | 23029806  | THBD         | -3.656±0.592 | -2.666±0.987 | 1.03E-09 |
| cg26885858 | 1  | 21766368  | NBPF3        | -4.631±0.568 | -3.738±0.875 | 1.03E-09 |
| cg03679305 | 1  | 9129487   | SLC2A5       | -1.697±0.322 | -0.982±0.748 | 1.03E-09 |
| cg23910835 | 4  | 154710900 | SFRP2        | -4.05±0.528  | -3.14±0.915  | 1.04E-09 |
| cg02774160 | 22 | 24979633  | GGT1         | 0.868±0.257  | 0.182±0.728  | 1.04E-09 |
| cg08009622 | 6  | 75916327  | COL12A1      | -4.333±0.346 | -3.4±0.992   | 1.05E-09 |
| cg05414338 | 6  | 26250347  | 0            | -4.373±0.45  | -2.77±1.724  | 1.06E-09 |
| cg10576828 | 1  | 70225863  | LRRC7        | 2.591±0.263  | 1.701±0.955  | 1.06E-09 |
| cg01643580 | 2  | 26916399  | KCNK3        | -2.201±0.405 | -1.387±0.843 | 1.07E-09 |
| cg08458487 | 10 | 81709191  | SFTPD        | 0.421±0.296  | -0.339±0.805 | 1.07E-09 |
| cg19812619 | 12 | 53600654  | ITGB7        | 2.268±0.416  | 1.571±0.697  | 1.07E-09 |
| cg11516377 | 17 | 1933153   | DPH1         | -3.036±0.479 | -2.277±0.747 | 1.08E-09 |
| cg09701102 | 11 | 67373083  | NDUFV1       | 2.13±0.251   | 2.514±0.374  | 1.09E-09 |
| cg11269533 | 2  | 219850301 | FEV          | -3.317±0.344 | -2.455±0.912 | 1.09E-09 |
| cg06084117 | 7  | 132334901 | FLJ40288     | 1.479±0.311  | 2.291±0.863  | 1.10E-09 |
| cg19358442 | 11 | 44325687  | ALX4         | -3.247±0.661 | -1.987±1.294 | 1.11E-09 |
| cg19803984 | 15 | 25068790  | SNRPN        | -0.25±0.212  | -0.846±0.636 | 1.11E-09 |
| cg25780543 | 7  | 154862770 | LOC100128264 | -0.645±0.407 | 0.003±0.64   | 1.13E-09 |
| cg03468463 | 18 | 61223564  | SERPINB12    | 1.817±0.304  | 0.943±0.934  | 1.13E-09 |
| cg25447894 | 22 | 41957443  | CSDC2        | -0.463±0.282 | 0.281±0.791  | 1.14E-09 |
| cg26929536 | 15 | 51973460  | SCG3         | -1.772±0.325 | -0.985±0.832 | 1.14E-09 |
| cg03818682 | 11 | 1213459   | 0            | 1.632±0.308  | 1.008±0.647  | 1.15E-09 |
| cg03876618 | 4  | 57976034  | LOC255130    | -3.048±0.429 | -2.201±0.875 | 1.15E-09 |
| cg07958192 | 4  | 90033974  | TIGD2        | -0.285±0.352 | 0.271±0.542  | 1.15E-09 |
| cg24645221 | 8  | 57358928  | PENK         | -3.938±0.601 | -2.688±1.302 | 1.16E-09 |
| cg10057295 | 13 | 99230004  | STK24        | -3.105±0.416 | -2.413±0.691 | 1.17E-09 |
| cg11668512 | 20 | 39929580  | ZHX3         | 3.385±0.384  | 2.621±0.791  | 1.17E-09 |
| cg00079056 | 9  | 33239641  | SPINK4       | 1.852±0.225  | 2.32±0.489   | 1.17E-09 |
| cg15284635 | 3  | 10858504  | SLC6A11      | -0.789±0.262 | -0.211±0.607 | 1.17E-09 |
| cg18303397 | 3  | 129160135 | MBD4         | -0.99±0.233  | -0.284±0.757 | 1.19E-09 |
| cg03224418 | 20 | 62611858  | PRPF6        | -0.066±0.246 | -0.832±0.824 | 1.19E-09 |
| cg02090283 | 9  | 39288218  | CNTNAP3      | -5.004±0.809 | -3.721±1.268 | 1.19E-09 |
| cg00616135 | 15 | 63413614  | LACTB        | -0.471±0.382 | 0.257±0.75   | 1.20E-09 |
| cg08972170 | 7  | 30185776  | C7orf41      | 1.796±0.303  | 2.322±0.533  | 1.20E-09 |
| cg13560548 | 3  | 10150139  | FANCD2OS     | 1.912±0.486  | 2.573±0.614  | 1.20E-09 |
| cg10235741 | 3  | 58200326  | 0            | 2.255±0.228  | 1.748±0.534  | 1.21E-09 |
| cg13168820 | 20 | 41818356  | PTPRT        | -3.957±0.805 | -2.742±1.183 | 1.22E-09 |
| cg26806924 | 20 | 33760017  | PROCR        | -3.587±0.461 | -2.989±0.54  | 1.22E-09 |
| cg02097420 | 3  | 186383874 | HRG          | 2.049±0.331  | 2.484±0.396  | 1.23E-09 |
| cg02007844 | 12 | 21927990  | KCNJ8        | -4.542±0.299 | -3.293±1.355 | 1.23E-09 |
| cg23422659 | 17 | 44929215  | WNT9B        | -4.31±0.779  | -2.908±1.431 | 1.25E-09 |
| cg26705553 | 16 | 3096711   | MMP25        | -4.765±0.411 | -3.737±1.093 | 1.25E-09 |
| cg08996413 | 8  | 134072427 | SLA          | 0.123±0.346  | -0.627±0.787 | 1.27E-09 |
| cg05467458 | 19 | 33361032  | SLC7A9       | -0.427±0.246 | 0.187±0.652  | 1.27E-09 |
| cg00626119 | 1  | 156785288 | NTRK1        | 0.433±0.167  | 0.845±0.437  | 1.27E-09 |
| cg00003994 | 7  | 15725862  | MEOX2        | -3.876±0.418 | -2.89±1.044  | 1.28E-09 |
| cg05209917 | 3  | 1134730   | CNTN6        | -0.285±0.387 | 0.654±0.997  | 1.29E-09 |
| cg00616129 | 12 | 10827014  | STYK1        | -3.321±0.388 | -3.79±0.403  | 1.30E-09 |
| cg19125999 | 1  | 27287282  | C1orf172     | -2.027±0.346 | -2.545±0.505 | 1.31E-09 |
| cg20113732 | 11 | 20691180  | NELL1        | -4.148±0.576 | -2.904±1.307 | 1.31E-09 |
| cg19026260 | 11 | 66045351  | CNIH2        | -3.764±0.311 | -4.29±0.531  | 1.31E-09 |
| cg25182621 | 3  | 184097440 | CHRD         | 0.558±0.253  | 1.236±0.726  | 1.31E-09 |
| cg08583049 | 15 | 60296815  | FOXB1        | -4.999±0.433 | -3.551±1.566 | 1.32E-09 |
| cg08555612 | 3  | 71834640  | PROK2        | -4.583±0.483 | -3.099±1.6   | 1.32E-09 |
| cg07842062 | 16 | 3306524   | MEFV         | 1.047±0.218  | 0.325±0.78   | 1.32E-09 |
| cg10723020 | 2  | 208393829 | CREB1        | -3.799±0.245 | -4.186±0.384 | 1.33E-09 |
| cg21164303 | 15 | 79603277  | TMED3        | -5.108±0.379 | -5.635±0.498 | 1.34E-09 |
| cg11934695 | 20 | 4230092   | ADRA1D       | -3.311±0.674 | -2.176±1.147 | 1.36E-09 |
| cg22294577 | 7  | 107444728 | SLC26A3      | 2.271±0.31   | 1.444±0.886  | 1.37E-09 |
| cg09210315 | 20 | 61273055  | SLCO4A1      | -0.62±0.297  | -1.295±0.715 | 1.38E-09 |
| cg07153965 | 11 | 125552087 | ACRV1        | 0.349±0.254  | 0.717±0.356  | 1.38E-09 |

|            |    |           |                |              |              |          |
|------------|----|-----------|----------------|--------------|--------------|----------|
| cg18429742 | 5  | 851101    | ZDHHC11        | 0.73±0.349   | -0.047±0.821 | 1.38E-09 |
| cg17745122 | 16 | 54320230  | IRX3           | -4.538±0.895 | -3.229±1.266 | 1.39E-09 |
| cg12071073 | 13 | 52436281  | CCDC70         | 2.258±0.221  | 1.82±0.456   | 1.40E-09 |
| cg15782391 | 19 | 51293367  | ACPT           | 1.852±0.218  | 1.123±0.79   | 1.40E-09 |
| cg08370996 | 15 | 96874031  | NR2F2          | -3.429±0.511 | -2.641±0.777 | 1.41E-09 |
| cg19475870 | 5  | 27038605  | CDH9           | -0.709±0.323 | 0.188±0.964  | 1.41E-09 |
| cg11159299 | 19 | 543432    | GZMM           | 1.156±0.246  | 0.704±0.465  | 1.42E-09 |
| cg19944367 | 9  | 116223775 | RGS3           | 3.23±0.363   | 2.725±0.479  | 1.43E-09 |
| cg18084554 | 19 | 929046    | ARID3A         | 0.357±0.237  | 0.863±0.533  | 1.44E-09 |
| cg01580568 | 1  | 209825856 | LAMB3          | 1.272±0.267  | 0.435±0.905  | 1.44E-09 |
| cg26991946 | 10 | 102732224 | SEMA4G         | 2.351±0.343  | 1.791±0.562  | 1.44E-09 |
| cg16725130 | 12 | 56236647  | MMP19          | -1.707±0.411 | -1.055±0.649 | 1.44E-09 |
| cg00638514 | 17 | 72932048  | OTOP3          | -4.212±0.427 | -3.123±1.166 | 1.44E-09 |
| cg13210534 | 11 | 111784328 | HSPB2-C11orf52 | -0.69±0.143  | -0.365±0.345 | 1.45E-09 |
| cg14252059 | 11 | 120973274 | TECTA          | 1.18±0.256   | 0.661±0.543  | 1.47E-09 |
| cg07436807 | 10 | 90712767  | ACTA2          | 1.407±0.274  | 1.919±0.53   | 1.49E-09 |
| cg25692621 | 7  | 95115163  | ASB4           | -0.867±0.359 | -0.103±0.797 | 1.51E-09 |
| cg00777121 | 3  | 50378191  | RASSF1         | -3.877±0.608 | -1.842±2.211 | 1.52E-09 |
| cg03292388 | 4  | 8594514   | CPZ            | -4.172±0.761 | -2.843±1.358 | 1.52E-09 |
| cg23922454 | 12 | 113910545 | LHX5           | -3.994±0.394 | -3.09±0.961  | 1.53E-09 |
| cg19815376 | 6  | 114225306 | FLJ34503       | -1.019±0.374 | -0.326±0.717 | 1.54E-09 |
| cg00237010 | 12 | 772861    | NINJ2          | 1.356±0.268  | 0.751±0.642  | 1.54E-09 |
| cg14175438 | 7  | 121036729 | FAM3C          | -2.668±0.268 | -3.129±0.47  | 1.54E-09 |
| cg26059632 | 1  | 153030751 | SPRR2A         | -0.181±0.279 | -0.91±0.783  | 1.54E-09 |
| cg16514843 | 7  | 127255483 | PAX4           | 1.291±0.274  | 0.545±0.803  | 1.55E-09 |
| cg08185661 | 11 | 7273498   | SYT9           | -2.135±0.634 | -0.92±1.264  | 1.55E-09 |
| cg12855851 | 6  | 41715185  | PGC            | 1.203±0.211  | 0.46±0.81    | 1.55E-09 |
| cg23896545 | 16 | 14927304  | NOMO1          | -1.144±0.251 | -0.689±0.468 | 1.55E-09 |
| cg13297960 | 21 | 22370237  | NCAM2          | -3.481±0.445 | -2.394±1.163 | 1.55E-09 |
| cg14849423 | 19 | 57351791  | PEG3           | 0.529±0.146  | 0.959±0.466  | 1.56E-09 |
| cg06540636 | 19 | 44174071  | PLAUR          | -3.613±0.476 | -4.163±0.456 | 1.56E-09 |
| cg07210490 | 12 | 50479634  | SMARCD1        | -5.011±0.604 | -4.209±0.744 | 1.56E-09 |
| cg18884137 | 17 | 7348490   | CHRNA1         | -2.969±0.293 | -3.442±0.475 | 1.57E-09 |
| cg26219051 | 22 | 43739629  | SCUBE1         | -2.606±0.349 | -1.925±0.711 | 1.58E-09 |
| cg10539507 | 4  | 85420782  | NKX6-1         | -3.05±0.392  | -1.956±1.182 | 1.58E-09 |
| cg16792160 | 10 | 52008593  | ASAH2          | 0.905±0.227  | 0.214±0.749  | 1.58E-09 |
| cg02600430 | 13 | 100623942 | ZIC5           | -1.746±0.191 | -1.099±0.705 | 1.59E-09 |
| cg04454951 | 7  | 49813031  | VWC2           | -3.678±0.366 | -2.53±1.247  | 1.60E-09 |
| cg09422355 | 19 | 48547158  | CABP5          | 1.997±0.326  | 1.225±0.825  | 1.61E-09 |
| cg21252483 | 19 | 49399788  | TULP2          | 0.967±0.149  | 1.375±0.44   | 1.61E-09 |
| cg16547529 | 11 | 75140681  | KLHL35         | 0.675±0.33   | 1.33±0.687   | 1.61E-09 |
| cg01231779 | 14 | 52535887  | NID2           | -4.164±0.443 | -2.927±1.337 | 1.62E-09 |
| cg10994379 | 5  | 35939420  | CAPSL          | -0.817±0.359 | -1.374±0.554 | 1.62E-09 |
| cg01431114 | 6  | 166076971 | PDE10A         | -3.166±0.396 | -2.223±1.008 | 1.62E-09 |
| cg26385222 | 7  | 150497077 | TMEM176B       | -1.489±0.474 | -0.665±0.843 | 1.62E-09 |
| cg14449051 | 12 | 85306474  | SLC6A15        | -5.168±0.488 | -3.819±1.457 | 1.63E-09 |
| cg12006284 | 11 | 32449638  | WT1            | -1.586±0.556 | -0.617±0.992 | 1.64E-09 |
| cg26293512 | 16 | 58010433  | TEPP           | -1.234±0.254 | -0.561±0.725 | 1.65E-09 |
| cg08256691 | 1  | 155881846 | RIT1           | 1.29±0.358   | 0.286±1.086  | 1.66E-09 |
| cg09313439 | 18 | 25757211  | CDH2           | -3.495±0.461 | -2.62±0.912  | 1.66E-09 |
| cg24355048 | 14 | 25045028  | CTSG           | 0.882±0.341  | 0.134±0.794  | 1.69E-09 |
| cg15883716 | 1  | 173638701 | ANKRD45        | -3.751±0.436 | -2.673±1.158 | 1.70E-09 |
| cg02067021 | 8  | 66934027  | DNAJC5B        | 0.971±0.274  | 0.174±0.865  | 1.71E-09 |
| cg19764436 | 22 | 23413260  | GNAZ           | -1.784±0.44  | -0.853±0.985 | 1.71E-09 |
| cg10500909 | 8  | 144000015 | CYP11B2        | 1.183±0.402  | 0.375±0.85   | 1.71E-09 |
| cg07031996 | 1  | 38324738  | MTF1           | -3.52±0.404  | -2.825±0.711 | 1.72E-09 |
| cg15297650 | 2  | 135477056 | TMEM163        | 0.662±0.231  | 1.022±0.36   | 1.72E-09 |
| cg11656547 | 9  | 72658747  | MAMDC2         | -2.844±0.426 | -2.205±0.63  | 1.73E-09 |
| cg27562023 | 17 | 201675    | RPH3AL         | 0.914±0.351  | 0.338±0.572  | 1.73E-09 |
| cg13966710 | 1  | 113392781 | LOC100996702   | -4.628±0.442 | -3.619±1.077 | 1.73E-09 |
| cg03894103 | 2  | 44586901  | PREPL          | 1.283±0.284  | 1.666±0.358  | 1.73E-09 |
| cg21509023 | 16 | 222380    | HBA2           | -4.546±0.536 | -3.386±1.233 | 1.76E-09 |
| cg09111484 | 12 | 80749651  | OTOGL          | 2.18±0.328   | 1.398±0.839  | 1.77E-09 |
| cg00343092 | 22 | 43547974  | TSPO           | -3.531±0.366 | -4.128±0.603 | 1.77E-09 |
| cg11639651 | 10 | 70979811  | HKDC1          | 0.291±0.253  | -0.358±0.7   | 1.77E-09 |
| cg20856834 | 6  | 29342522  | OR12D3         | 0.829±0.235  | 0.084±0.812  | 1.78E-09 |
| cg17571291 | 7  | 43797787  | BLVRA          | -1.251±0.281 | -1.884±0.676 | 1.78E-09 |
| cg08551633 | 19 | 43099046  | CEACAM8        | 0.028±0.127  | -0.33±0.389  | 1.79E-09 |
| cg11976616 | 5  | 41213172  | C6             | 1.482±0.222  | 0.693±0.855  | 1.80E-09 |
| cg07300408 | 14 | 21058360  | RNASE11        | 0.037±0.298  | 0.512±0.477  | 1.80E-09 |

|            |    |           |           |              |              |          |
|------------|----|-----------|-----------|--------------|--------------|----------|
| cg11715966 | 19 | 46917255  | CCDC8     | 1.465±0.348  | 1.898±0.387  | 1.81E-09 |
| cg16791686 | 19 | 48249014  | GLTSCR2   | 1.178±0.328  | 0.548±0.661  | 1.81E-09 |
| cg15302379 | 10 | 102821848 | KAZALD1   | 1.365±0.217  | 0.83±0.576   | 1.81E-09 |
| cg04963951 | 5  | 121187764 | FTMT      | 4.195±0.426  | 3.388±0.843  | 1.82E-09 |
| cg04270799 | 12 | 57944059  | KIF5A     | -3.234±0.377 | -2.238±1.078 | 1.86E-09 |
| cg11732619 | 5  | 168728076 | SLIT3     | -3.842±0.776 | -2.516±1.359 | 1.86E-09 |
| cg19560971 | 11 | 119218238 | MFRP      | 1.659±0.218  | 1.084±0.622  | 1.89E-09 |
| cg09781594 | 2  | 8469388   | LINC00299 | 2.061±0.248  | 1.295±0.835  | 1.90E-09 |
| cg26270746 | 13 | 28366498  | GSX1      | -3.025±0.293 | -2.122±0.987 | 1.93E-09 |
| cg24243265 | 8  | 130799851 | GSDMC     | 1.689±0.258  | 0.856±0.912  | 1.93E-09 |
| cg02512226 | 10 | 28288192  | ARMC4     | -1.395±0.258 | -0.845±0.586 | 1.94E-09 |
| cg02142461 | 4  | 4293079   | ZBTB49    | 1.014±0.375  | 1.576±0.555  | 1.94E-09 |
| cg20777437 | 1  | 54619703  | CDCP2     | -0.399±0.249 | -1.033±0.686 | 1.95E-09 |
| cg10108208 | 19 | 33571252  | GPATCH1   | 0.981±0.348  | 0.397±0.597  | 1.95E-09 |
| cg25104511 | 17 | 38333503  | RAPGEFL1  | -0.819±0.196 | -1.254±0.465 | 1.96E-09 |
| cg25375764 | 6  | 24494665  | ALDH5A1   | -2.206±0.257 | -1.463±0.81  | 1.96E-09 |
| cg16112157 | 12 | 52887685  | KRT6A     | 2.086±0.291  | 1.549±0.56   | 1.97E-09 |
| cg07378350 | 20 | 34027324  | GDF5      | -0.095±0.277 | -0.771±0.73  | 1.97E-09 |
| cg09260441 | 20 | 53091739  | DOK5      | -3.802±0.347 | -2.914±0.961 | 1.97E-09 |
| cg26216632 | 2  | 132479319 | C2orf27A  | 1.786±0.248  | 1.481±0.271  | 1.98E-09 |
| cg24222324 | 13 | 43145414  | TNFSF11   | 2.562±0.235  | 1.718±0.928  | 1.98E-09 |
| cg02357714 | 5  | 176936563 | DOK3      | -0.416±0.226 | 0.181±0.647  | 1.98E-09 |
| cg15967525 | 4  | 40517938  | RBM47     | -0.059±0.285 | -0.676±0.658 | 1.98E-09 |
| cg18901940 | 10 | 69869364  | MYPN      | 0.58±0.295   | 1.005±0.405  | 2.00E-09 |
| cg05800321 | 8  | 143867799 | LY6D      | 2.881±0.418  | 2.196±0.697  | 2.01E-09 |
| cg23828595 | 10 | 52833610  | PRKG1     | -4.653±0.45  | -3.587±1.147 | 2.01E-09 |
| cg27634151 | 11 | 94134646  | GPR83     | -3.24±0.37   | -2.052±1.302 | 2.01E-09 |
| cg09325101 | 15 | 65342522  | SLC51B    | -1.16±0.338  | -0.479±0.721 | 2.03E-09 |
| cg20627916 | 6  | 152128328 | ESR1      | -2.024±0.44  | -1.182±0.884 | 2.03E-09 |
| cg20985014 | 6  | 112374151 | WISP3     | 2.231±0.226  | 1.731±0.535  | 2.05E-09 |
| cg07545925 | 11 | 118214927 | CD3G      | -0.845±0.298 | -0.21±0.677  | 2.06E-09 |
| cg23248452 | 5  | 9631117   | TAS2R1    | 0.276±0.242  | -0.452±0.797 | 2.07E-09 |
| cg01827098 | 7  | 150211152 | GIMAP7    | 2.414±0.433  | 1.329±1.175  | 2.07E-09 |
| cg21431536 | 13 | 32313824  | RXFP2     | 1.498±0.343  | 0.906±0.603  | 2.08E-09 |
| cg02727423 | 14 | 100258973 | EML1      | 0.214±0.371  | 0.938±0.764  | 2.08E-09 |
| cg22766145 | 8  | 65492528  | BHLHE22   | -3.108±0.281 | -2.329±0.848 | 2.09E-09 |
| cg18994063 | 5  | 156389699 | TIMD4     | -0.219±0.227 | -0.839±0.675 | 2.10E-09 |
| cg00321478 | 1  | 197238398 | CRB1      | 1.509±0.299  | 2.181±0.722  | 2.12E-09 |
| cg05158615 | 7  | 24323559  | NPY       | -2.984±0.396 | -1.83±1.261  | 2.14E-09 |
| cg09794131 | 16 | 71264658  | HYDIN     | -3.683±0.4   | -2.763±0.991 | 2.14E-09 |
| cg19568591 | 2  | 183731599 | FRZB      | -3.184±0.245 | -2.494±0.753 | 2.15E-09 |
| cg19098268 | 19 | 57352269  | MIMT1     | 1.255±0.223  | 1.691±0.461  | 2.15E-09 |
| cg24587268 | 20 | 60813121  | OSBPL2    | -4.262±0.469 | -4.856±0.545 | 2.16E-09 |
| cg04237663 | 8  | 110987019 | KCNV1     | -4.084±0.377 | -3.087±1.085 | 2.18E-09 |
| cg01472101 | 17 | 6983991   | CLEC10A   | -0.917±0.315 | -1.575±0.701 | 2.18E-09 |
| cg04569804 | 5  | 149493814 | CSF1R     | 2.096±0.184  | 1.627±0.51   | 2.19E-09 |
| cg25854162 | 2  | 217497617 | IGFBP2    | -2.862±0.442 | -1.951±0.971 | 2.19E-09 |
| cg22231902 | 2  | 119604901 | EN1       | -3.993±0.509 | -2.562±1.564 | 2.19E-09 |
| cg01443452 | 19 | 36024439  | GAPDHS    | 1.211±0.653  | 2.059±0.79   | 2.19E-09 |
| cg21047206 | 1  | 145076221 | PDE4DIP   | 0.729±0.14   | 1.029±0.321  | 2.19E-09 |
| cg05346140 | 17 | 40275057  | HSPB9     | 2.709±0.279  | 1.621±1.203  | 2.21E-09 |
| cg00474004 | 9  | 21239944  | IFNA14    | 1.717±0.302  | 1.105±0.65   | 2.24E-09 |
| cg11767711 | 19 | 36358783  | APLP1     | 2.246±0.185  | 1.853±0.42   | 2.25E-09 |
| cg02838877 | 13 | 97873877  | MBNL2     | -0.234±0.357 | 0.295±0.525  | 2.25E-09 |
| cg12622986 | 9  | 135458173 | BARHL1    | -2.749±0.509 | -1.846±0.94  | 2.26E-09 |
| cg27626102 | 7  | 89840731  | STEAP2    | -3.299±0.291 | -2.477±0.9   | 2.26E-09 |
| cg00433406 | 1  | 20616975  | VWA5B1    | 1.438±0.298  | 2.135±0.754  | 2.28E-09 |
| cg20033731 | 12 | 2161371   | CACNA1C   | -3.906±0.482 | -3.104±0.824 | 2.28E-09 |
| cg08430598 | 20 | 23731367  | CST1      | 3.331±0.415  | 2.538±0.838  | 2.29E-09 |
| cg10837843 | 5  | 172199244 | DUSP1     | -4.103±0.382 | -4.577±0.429 | 2.30E-09 |
| cg24831427 | 6  | 99842353  | COQ3      | 1.085±0.344  | 0.276±0.875  | 2.32E-09 |
| cg24446548 | 7  | 19157263  | TWIST1    | -3.567±0.341 | -2.064±1.668 | 2.32E-09 |
| cg18804206 | 17 | 18162315  | FLII      | -1.383±0.196 | -1.803±0.451 | 2.32E-09 |
| cg14761227 | 7  | 130021088 | CPA1      | 1.554±0.281  | 0.885±0.725  | 2.33E-09 |
| cg11778001 | 2  | 191512851 | NAB1      | -1.411±0.329 | -1.951±0.553 | 2.36E-09 |
| cg16098726 | 3  | 128778738 | GP9       | 2.278±0.248  | 2.766±0.518  | 2.36E-09 |
| cg18881501 | 17 | 21187376  | MAP2K3    | -1.019±0.412 | -1.654±0.639 | 2.36E-09 |
| cg13587552 | 1  | 1216441   | SCNN1D    | 1.786±0.321  | 1.112±0.721  | 2.37E-09 |
| cg13792279 | 21 | 31538549  | CLDN17    | 3.396±0.36   | 2.6±0.857    | 2.38E-09 |
| cg06597095 | 5  | 43480361  | C5orf28   | 0.61±0.193   | 0.956±0.362  | 2.41E-09 |

|            |    |           |           |              |              |          |
|------------|----|-----------|-----------|--------------|--------------|----------|
| cg11566244 | 11 | 67351786  | GSTP1     | -2.103±0.295 | -1.673±0.425 | 2.41E-09 |
| cg10065825 | 16 | 65157050  | CDH11     | -3.293±0.656 | -2.347±0.931 | 2.41E-09 |
| cg07027513 | 18 | 29265840  | B4GALT6   | -3.712±0.38  | -2.776±1.018 | 2.42E-09 |
| cg19740375 | 3  | 38690410  | SCN5A     | -2.357±0.286 | -1.571±0.861 | 2.42E-09 |
| cg03663715 | 5  | 72744904  | FOXD1     | -3.102±0.27  | -1.966±1.261 | 2.43E-09 |
| cg06397510 | 1  | 32403634  | PTP4A2    | -4.973±0.699 | -4.161±0.697 | 2.44E-09 |
| cg04563996 | 3  | 57093519  | SPATA12   | 0.435±0.356  | -0.069±0.493 | 2.45E-09 |
| cg20622019 | 20 | 43279793  | ADA       | 1.065±0.421  | 0.285±0.821  | 2.46E-09 |
| cg00576250 | 20 | 45087765  | ZNF663    | -3.5±0.31    | -2.647±0.935 | 2.47E-09 |
| cg06151964 | 19 | 35531417  | HPN       | 0.268±0.21   | 0.72±0.485   | 2.48E-09 |
| cg05674944 | 1  | 26372290  | SLC30A2   | -3.002±0.654 | -2.014±0.991 | 2.48E-09 |
| cg16761581 | 14 | 24803807  | ADCY4     | -4.134±0.507 | -2.764±1.501 | 2.50E-09 |
| cg18841952 | 6  | 47652462  | GPR111    | 1.294±0.315  | 0.507±0.859  | 2.52E-09 |
| cg02941816 | 10 | 131265696 | MGMT      | -3.793±0.422 | -4.338±0.509 | 2.53E-09 |
| cg14563260 | 9  | 113801320 | LPAR1     | -3.528±0.488 | -2.681±0.881 | 2.55E-09 |
| cg02222362 | 10 | 48828109  | PTPN20B   | 0.443±0.421  | 1.171±0.757  | 2.55E-09 |
| cg22175764 | 20 | 56803964  | 0         | -4.113±0.516 | -2.893±1.325 | 2.59E-09 |
| cg25602457 | 18 | 49868101  | DCC       | -3.739±0.336 | -2.81±1.02   | 2.60E-09 |
| cg14174099 | 14 | 70655862  | SLC8A3    | -5.494±0.465 | -3.906±1.759 | 2.61E-09 |
| cg08025786 | 15 | 74899328  | CLK3      | 2.639±0.313  | 2.218±0.404  | 2.62E-09 |
| cg10007262 | 7  | 103631219 | RELN      | -3.19±0.761  | -2.179±0.961 | 2.64E-09 |
| cg17676129 | 10 | 135382545 | SYCE1     | 0.5±0.196    | 0.781±0.277  | 2.64E-09 |
| cg01200177 | 2  | 128616082 | POLR2D    | -0.872±0.38  | -1.522±0.676 | 2.66E-09 |
| cg12408911 | 16 | 87903671  | SLC7A5    | 1.006±0.144  | 1.382±0.413  | 2.66E-09 |
| cg23967169 | 3  | 68981503  | FAM19A4   | -3.539±0.379 | -2.432±1.22  | 2.68E-09 |
| cg20847746 | 1  | 153600865 | S100A1    | 1.223±0.158  | 0.745±0.528  | 2.68E-09 |
| cg14861570 | 17 | 53499954  | MMD       | -1.155±0.25  | -1.633±0.508 | 2.71E-09 |
| cg20449692 | 3  | 170136920 | CLDN11    | -3.308±0.7   | -2.265±1.044 | 2.73E-09 |
| cg11213150 | 9  | 129884457 | ANGPTL2   | -0.65±0.354  | 0.165±0.886  | 2.73E-09 |
| cg01211097 | 16 | 84732969  | USP10     | -0.505±0.254 | -1.017±0.549 | 2.73E-09 |
| cg15554401 | 1  | 35226891  | GJB4      | 2.892±0.449  | 2.121±0.803  | 2.73E-09 |
| cg26922202 | 9  | 35957984  | OR2S2     | 0.932±0.331  | 0.241±0.742  | 2.74E-09 |
| cg16381688 | 6  | 24665947  | TDP2      | 1.315±0.298  | 1.823±0.523  | 2.74E-09 |
| cg18815943 | 1  | 47882314  | FOXE3     | -4±0.743     | -2.416±1.707 | 2.74E-09 |
| cg16530429 | 1  | 26737470  | LIN28A    | -2.565±0.395 | -1.866±0.733 | 2.75E-09 |
| cg24844534 | 17 | 77020267  | C1QTNF1   | -5.441±0.455 | -4.351±1.188 | 2.75E-09 |
| cg27269921 | 22 | 28197091  | MN1       | -4.527±1.382 | -2.748±1.666 | 2.75E-09 |
| cg25485913 | 19 | 49568962  | 0         | -1.459±0.287 | -0.794±0.722 | 2.76E-09 |
| cg00837103 | 20 | 61447268  | COL9A3    | -0.561±0.166 | -0.904±0.368 | 2.76E-09 |
| cg01564343 | 6  | 41121920  | TREML1    | 0.945±0.188  | 1.407±0.505  | 2.76E-09 |
| cg06470471 | 3  | 54961911  | LRTM1     | 1.334±0.327  | 1.758±0.4    | 2.77E-09 |
| cg08108953 | 20 | 44329941  | WFDC13    | 0.196±0.313  | -0.328±0.537 | 2.78E-09 |
| cg03777459 | 20 | 61051802  | GATA5     | -3.252±0.29  | -2.161±1.215 | 2.83E-09 |
| cg27433062 | 1  | 161194369 | APOA2     | 1.282±0.256  | 1.785±0.533  | 2.88E-09 |
| cg27015047 | 10 | 124320805 | DMBT1     | 1.063±0.351  | 0.392±0.715  | 2.88E-09 |
| cg10918927 | 12 | 54411193  | HOXC5     | -3.57±0.274  | -4.23±0.721  | 2.90E-09 |
| cg07657236 | 3  | 19190202  | KCNH8     | -3.185±0.297 | -2.468±0.783 | 2.91E-09 |
| cg12014417 | 12 | 123187920 | HCAR2     | 0.125±0.309  | -0.513±0.687 | 2.92E-09 |
| cg00401678 | 19 | 14787227  | EMR3      | -0.416±0.225 | -0.858±0.473 | 2.92E-09 |
| cg10757144 | 5  | 140625237 | PCDHB15   | -2.324±0.281 | -1.467±0.95  | 2.92E-09 |
| cg24861272 | 10 | 31607153  | ZEB1-AS1  | -1.498±0.24  | -2.081±0.637 | 2.94E-09 |
| cg21146268 | 6  | 26183508  | HIST1H2BE | -2.961±0.372 | -0.128±0.904 | 2.98E-09 |
| cg09018824 | 4  | 41361919  | LIMCH1    | 0.356±0.345  | -0.375±0.789 | 3.02E-09 |
| cg01351032 | 16 | 10971191  | CIITA     | 0.292±0.284  | -0.59±0.979  | 3.04E-09 |
| cg18121684 | 18 | 61254561  | SERPINB13 | 2.713±0.299  | 1.801±1.011  | 3.06E-09 |
| cg20998885 | 20 | 18794833  | SCP2D1    | 2.31±0.225   | 1.585±0.806  | 3.06E-09 |
| cg03390211 | 16 | 325826    | RGS11     | -5.466±0.558 | -4.128±1.463 | 3.07E-09 |
| cg10173075 | 15 | 89764836  | RLBP1     | 1.847±0.23   | 1.43±0.441   | 3.07E-09 |
| cg06285340 | 15 | 74659901  | CYP11A1   | 2.614±0.426  | 1.983±0.634  | 3.09E-09 |
| cg05040360 | 11 | 60102449  | MS4A6E    | 1.734±0.33   | 1.123±0.643  | 3.11E-09 |
| cg24331079 | 2  | 192016205 | STAT4     | 3.64±0.209   | 2.583±1.187  | 3.11E-09 |
| cg06424894 | 15 | 45314789  | SORD      | -0.732±0.408 | -1.388±0.676 | 3.12E-09 |
| cg04717045 | 11 | 69468789  | CCND1     | 2.259±0.287  | 1.452±0.892  | 3.12E-09 |
| cg02825709 | 16 | 3354207   | ZNF75A    | 2.131±0.345  | 1.429±0.756  | 3.12E-09 |
| cg19970051 | 16 | 226184    | HBA1      | -4.292±0.495 | -3.193±1.196 | 3.13E-09 |
| cg07026910 | 2  | 234070710 | INPP5D    | 1.71±0.275   | 2.056±0.322  | 3.14E-09 |
| cg05824215 | 6  | 167536046 | CCR6      | 1.436±0.346  | 0.742±0.747  | 3.18E-09 |
| cg18729973 | 21 | 43785785  | TFF1      | 1.601±0.188  | 1.205±0.429  | 3.18E-09 |
| cg00273068 | 20 | 39995747  | EMILIN3   | -2.864±0.328 | -2.047±0.897 | 3.20E-09 |
| cg05420896 | 18 | 49867488  | DCC       | -3.078±0.387 | -2.267±0.869 | 3.21E-09 |

|            |    |           |           |              |              |          |
|------------|----|-----------|-----------|--------------|--------------|----------|
| cg01857260 | 19 | 50666552  | IZUMO2    | -2.258±0.346 | -1.595±0.709 | 3.23E-09 |
| cg24623694 | 19 | 40919760  | PRX       | -1.554±0.4   | -0.864±0.724 | 3.23E-09 |
| cg13086467 | 19 | 12779373  | WDR83OS   | 1.683±0.231  | 2.122±0.469  | 3.24E-09 |
| cg00121640 | 9  | 120176515 | ASTN2     | -3.225±0.36  | -2.485±0.8   | 3.24E-09 |
| cg01015871 | 16 | 56599188  | MT4       | 0.804±0.291  | 0.18±0.677   | 3.26E-09 |
| cg11797994 | 11 | 44330731  | ALX4      | -0.869±0.278 | -0.495±0.362 | 3.27E-09 |
| cg10920957 | 16 | 87635473  | JPH3      | -4.217±0.358 | -3.219±1.106 | 3.28E-09 |
| cg20862496 | 8  | 143823734 | SLURP1    | 3.218±0.298  | 2.707±0.537  | 3.30E-09 |
| cg25928579 | 17 | 46692534  | HOXB8     | -3.717±0.373 | -2.836±0.966 | 3.31E-09 |
| cg16864658 | 3  | 42306150  | CCK       | -2.766±0.455 | -1.857±0.979 | 3.31E-09 |
| cg12319004 | 1  | 226078237 | LEFTY1    | 1.669±0.137  | 1.194±0.531  | 3.34E-09 |
| cg26986815 | 2  | 202149369 | CASP8     | 2.455±0.299  | 2.056±0.386  | 3.37E-09 |
| cg26866325 | 4  | 74920559  | PPBPP2    | -0.161±0.292 | -0.792±0.687 | 3.41E-09 |
| cg05766474 | 17 | 34308668  | CCL16     | 3.097±0.419  | 2.183±0.995  | 3.42E-09 |
| cg20582779 | 1  | 222721375 | HHLPL2    | -0.086±0.298 | -0.679±0.638 | 3.42E-09 |
| cg20345978 | 1  | 26798271  | HMGN2     | -5.112±0.354 | -5.504±0.326 | 3.43E-09 |
| cg22108265 | 11 | 73471972  | RAB6A     | -4.47±0.469  | -3.775±0.701 | 3.45E-09 |
| cg06493994 | 6  | 25652602  | SCGN      | -3.114±0.351 | -2.161±1.057 | 3.48E-09 |
| cg24392274 | 9  | 130921842 | C9orf16   | -0.916±0.194 | -1.395±0.528 | 3.52E-09 |
| cg25799433 | 20 | 1600623   | SIRPB1    | -1.225±0.27  | -1.8±0.626   | 3.55E-09 |
| cg13645078 | 1  | 201438647 | PHLDA3    | -3.908±0.35  | -3.358±0.567 | 3.55E-09 |
| cg03109701 | 12 | 117174758 | C12orf49  | 0.042±0.26   | -0.445±0.521 | 3.55E-09 |
| cg16222762 | 18 | 40857464  | SYT4      | -4.7±0.466   | -3.731±1.052 | 3.57E-09 |
| cg09816180 | 4  | 72650088  | GC        | 2.302±0.225  | 1.771±0.584  | 3.57E-09 |
| cg20279283 | 8  | 11566863  | GATA4     | -0.205±0.338 | 0.31±0.527   | 3.60E-09 |
| cg00520135 | 15 | 63333846  | TPM1      | 1.959±0.322  | 2.557±0.638  | 3.60E-09 |
| cg07675169 | 20 | 61886262  | NKAIN4    | -3.125±0.376 | -2.338±0.855 | 3.60E-09 |
| cg04790129 | 21 | 46340810  | ITGB2-AS1 | 0.193±0.164  | 0.583±0.429  | 3.61E-09 |
| cg09416313 | 19 | 3801727   | MATK      | -4.702±0.55  | -3.276±1.578 | 3.61E-09 |
| cg11086066 | 20 | 50159508  | NFATC2    | -2.614±0.426 | -3.136±0.479 | 3.62E-09 |
| cg03873930 | 20 | 62340664  | ZGPAT     | 1.26±0.277   | 1.697±0.45   | 3.62E-09 |
| cg16340268 | 1  | 226925172 | ITPKB     | -3.893±0.24  | -2.622±1.436 | 3.63E-09 |
| cg19228118 | 1  | 34631324  | CSMD2     | -3.591±0.369 | -2.728±0.949 | 3.65E-09 |
| cg08460026 | 2  | 204732474 | CTLA4     | 1.518±0.421  | 0.72±0.856   | 3.67E-09 |
| cg04291079 | 14 | 101294430 | MEG3      | 1.705±0.317  | 2.604±1.001  | 3.68E-09 |
| cg19589427 | 1  | 173019720 | TNFSF18   | -0.257±0.355 | 0.49±0.812   | 3.68E-09 |
| cg24800810 | 1  | 241520926 | RGS7      | -2.416±0.428 | -1.6±0.876   | 3.69E-09 |
| cg12324629 | 17 | 19771548  | ULK2      | -0.151±0.268 | 0.414±0.615  | 3.69E-09 |
| cg03426225 | 18 | 10697032  | PIEZO2    | 3.768±0.409  | 2.667±1.221  | 3.70E-09 |
| cg13266631 | 8  | 24815006  | NEFL      | -2.879±0.274 | -2.105±0.862 | 3.70E-09 |
| cg04036898 | 1  | 46664598  | POMGNT1   | -1.599±0.245 | -2.037±0.466 | 3.71E-09 |
| cg26113512 | 3  | 38035601  | VILL      | -2.261±0.551 | -0.669±1.774 | 3.71E-09 |
| cg25995212 | 2  | 167342984 | SCN7A     | 2.158±0.289  | 1.457±0.773  | 3.71E-09 |
| cg10201668 | 15 | 45422393  | DUOX1     | -2.041±0.486 | -1.421±0.586 | 3.71E-09 |
| cg23464269 | 2  | 234637667 | UGT1A3    | 0.062±0.236  | -0.485±0.601 | 3.71E-09 |
| cg07747970 | 17 | 35293719  | LHX1      | -3.266±0.25  | -2.391±0.982 | 3.72E-09 |
| cg13047892 | 7  | 15726649  | MEOX2     | -4.337±0.434 | -3.377±1.05  | 3.73E-09 |
| cg16332224 | 20 | 49576406  | MOCS3     | 2.723±0.27   | 3.028±0.262  | 3.76E-09 |
| cg01288598 | 6  | 14118227  | CD83      | -3.507±0.371 | -3.952±0.403 | 3.77E-09 |
| cg05345286 | 6  | 41606641  | MDFI      | -3.166±0.614 | -1.808±1.486 | 3.79E-09 |
| cg03077492 | 5  | 43413095  | CCL28     | 2.441±0.212  | 1.594±0.956  | 3.81E-09 |
| cg05253327 | 2  | 62420915  | 0         | 1.645±0.209  | 1.938±0.291  | 3.82E-09 |
| cg03731616 | 3  | 123603618 | MYLK      | -2.571±0.303 | -1.841±0.805 | 3.82E-09 |
| cg21062347 | 11 | 62783543  | SLC22A8   | -1.859±0.321 | -1.104±0.832 | 3.84E-09 |
| cg13283751 | 6  | 28493811  | GPX5      | -2.084±0.344 | -2.732±0.696 | 3.84E-09 |
| cg14292823 | 8  | 144681097 | TIGD5     | 0.384±0.237  | 0.892±0.555  | 3.87E-09 |
| cg10520594 | 17 | 73127197  | NT5C      | -3.722±0.487 | -4.299±0.518 | 3.88E-09 |
| cg03766998 | 18 | 12378044  | AFG3L2    | -2.661±0.383 | -3.114±0.405 | 3.90E-09 |
| cg16192575 | 10 | 48828106  | PTPN20A   | -0.366±0.581 | 0.529±0.919  | 3.91E-09 |
| cg00427635 | 15 | 74166372  | TBC1D21   | -1.476±0.293 | -1.996±0.548 | 3.92E-09 |
| cg01062029 | 9  | 94712909  | ROR2      | -5.066±0.432 | -4.132±1.022 | 3.95E-09 |
| cg00096922 | 7  | 96654185  | DLX5      | -4.563±0.451 | -3.413±1.276 | 3.95E-09 |
| cg07197059 | 14 | 23836012  | EFS       | -0.827±0.384 | -0.024±0.875 | 3.99E-09 |
| cg23918047 | 17 | 79828356  | ARHGDI4   | -4.141±0.306 | -3.226±1.024 | 3.99E-09 |
| cg07634191 | 8  | 27850178  | SCARA5    | -1.712±0.365 | -0.678±1.154 | 4.00E-09 |
| cg04774694 | 16 | 68033270  | DPEP2     | 1.529±0.252  | 1.209±0.303  | 4.01E-09 |
| cg23698287 | 1  | 32758300  | HDAC1     | -3.426±0.231 | -3.724±0.284 | 4.01E-09 |
| cg16319578 | 14 | 65007512  | HSPA2     | -4.645±0.553 | -3.085±1.742 | 4.03E-09 |
| cg12158019 | 1  | 40237316  | OXCT2     | 0.018±0.332  | 0.633±0.66   | 4.03E-09 |
| cg10743104 | 1  | 13910206  | PDPN      | -4.227±0.402 | -3.066±1.298 | 4.05E-09 |

|            |    |           |                  |              |              |          |
|------------|----|-----------|------------------|--------------|--------------|----------|
| cg10862535 | 19 | 46526483  | <i>PGLYRP1</i>   | -0.747±0.386 | -0.026±0.775 | 4.06E-09 |
| cg18988110 | 17 | 46035343  | <i>PRR15L</i>    | -1.247±0.265 | -1.834±0.645 | 4.06E-09 |
| cg04653021 | 3  | 122514541 | <i>DIRC2</i>     | -2.439±0.374 | -1.957±0.46  | 4.08E-09 |
| cg18534730 | 19 | 48547448  | <i>CABP5</i>     | 1.328±0.293  | 0.469±0.962  | 4.10E-09 |
| cg02456292 | 19 | 42817262  | <i>TMEM145</i>   | -2.968±0.292 | -2.426±0.582 | 4.11E-09 |
| cg25832796 | 14 | 24038103  | <i>AP1G2</i>     | -2.132±0.402 | -1.462±0.705 | 4.11E-09 |
| cg19764555 | 11 | 62315119  | <i>AHNAK</i>     | -2.025±0.624 | -1.266±0.699 | 4.12E-09 |
| cg20380069 | 12 | 120806617 | <i>MSI1</i>      | -4.723±0.724 | -3.616±1.139 | 4.12E-09 |
| cg16148454 | 16 | 69385606  | <i>TMED6</i>     | 1.352±0.292  | 0.542±0.906  | 4.26E-09 |
| cg09096950 | 11 | 118230095 | <i>UBE4A</i>     | -1.448±0.326 | -2.106±0.717 | 4.30E-09 |
| cg09628601 | 19 | 47523630  | <i>NPAS1</i>     | -3.21±0.504  | -2.405±0.838 | 4.31E-09 |
| cg01260219 | 11 | 130299333 | <i>ADAMTS8</i>   | 0.561±0.17   | 0.015±0.614  | 4.31E-09 |
| cg18939260 | 8  | 125741346 | <i>MTSS1</i>     | 2.248±0.375  | 2.792±0.552  | 4.32E-09 |
| cg10954182 | 12 | 104532377 | <i>NFYB</i>      | -1.906±0.254 | -2.509±0.669 | 4.36E-09 |
| cg09546307 | 12 | 8664963   | <i>CLEC4D</i>    | 2.391±0.226  | 1.734±0.737  | 4.39E-09 |
| cg27022827 | 19 | 3728751   | <i>TJP3</i>      | 0.396±0.245  | -0.146±0.596 | 4.43E-09 |
| cg10541755 | 3  | 170625872 | <i>EIF5A2</i>    | -4.462±0.392 | -3.074±1.568 | 4.45E-09 |
| cg00995065 | 12 | 21283725  | <i>SLCO1B1</i>   | 0.269±0.309  | -0.407±0.744 | 4.48E-09 |
| cg12024292 | 9  | 120177979 | <i>ASTN2</i>     | -3.273±0.431 | -2.486±0.846 | 4.49E-09 |
| cg08491964 | 18 | 53255771  | <i>TCF4</i>      | -2.75±0.275  | -2.102±0.718 | 4.54E-09 |
| cg08307092 | 6  | 26200174  | <i>HIST1H2BF</i> | -4.344±0.562 | -2.873±1.643 | 4.58E-09 |
| cg10663017 | 1  | 159750305 | <i>DUSP23</i>    | -4.105±0.47  | -4.688±0.548 | 4.60E-09 |
| cg06872331 | 2  | 119981960 | <i>STEAP3</i>    | -3.434±0.343 | -3.844±0.374 | 4.63E-09 |
| cg22925639 | 2  | 175628739 | <i>CHRNA1</i>    | 2.58±0.313   | 1.983±0.646  | 4.63E-09 |
| cg23878206 | 19 | 50431425  | <i>ATF5</i>      | 1.828±0.303  | 1.303±0.559  | 4.69E-09 |
| cg20939319 | 8  | 30707701  | <i>TEX15</i>     | 0.335±0.339  | -0.335±0.715 | 4.73E-09 |
| cg20416179 | 6  | 150690143 | <i>IYD</i>       | 1.192±0.253  | 0.543±0.724  | 4.76E-09 |
| cg26065841 | 15 | 41244853  | <i>CHAC1</i>     | 2.211±0.161  | 1.779±0.484  | 4.76E-09 |
| cg18408487 | 17 | 39993262  | <i>NT5C3B</i>    | 2.423±0.437  | 1.733±0.721  | 4.78E-09 |
| cg21281799 | 12 | 68041322  | <i>DYRK2</i>     | 1.351±0.192  | 0.781±0.641  | 4.80E-09 |
| cg20472189 | 10 | 135051475 | <i>VENTX</i>     | 1.202±0.196  | 0.967±0.216  | 4.84E-09 |
| cg06817269 | 15 | 59909035  | <i>GCNT3</i>     | 2.066±0.353  | 1.371±0.757  | 4.85E-09 |
| cg16555388 | 3  | 172241216 | <i>TNFSF10</i>   | -2.944±0.321 | -3.377±0.427 | 4.86E-09 |
| cg15457899 | 11 | 123525665 | <i>SCN3B</i>     | -3.259±0.505 | -2.15±1.225  | 4.86E-09 |
| cg06088314 | 2  | 201730276 | <i>CLK1</i>      | 3.353±0.304  | 2.542±0.909  | 4.88E-09 |
| cg15836660 | 13 | 78493128  | <i>EDNRB</i>     | -4.572±0.431 | -3.892±0.71  | 4.90E-09 |
| cg08878323 | 7  | 96652464  | <i>DLX5</i>      | -2.161±0.382 | -1.515±0.686 | 4.92E-09 |
| cg23673107 | 19 | 11908712  | <i>ZNF491</i>    | -1.342±0.437 | -0.586±0.806 | 4.93E-09 |
| cg00625653 | 3  | 13921227  | <i>WNT7A</i>     | -3.909±0.532 | -2.984±0.989 | 4.93E-09 |
| cg20166532 | 1  | 101702782 | <i>S1PR1</i>     | -4.032±0.232 | -2.962±1.22  | 4.95E-09 |
| cg24264578 | 16 | 3405902   | <i>OR2C1</i>     | 3.31±0.252   | 2.592±0.808  | 4.96E-09 |
| cg25554036 | 4  | 6271136   | <i>WFS1</i>      | -2.189±0.351 | -2.733±0.566 | 4.97E-09 |
| cg13813391 | 16 | 66613407  | <i>CMTM2</i>     | 1.424±0.221  | 1.9±0.524    | 5.02E-09 |
| cg24499411 | 7  | 47580247  | <i>TNS3</i>      | 1.215±0.31   | 1.69±0.492   | 5.03E-09 |
| cg06255227 | 20 | 62738125  | <i>NPBWR2</i>    | 2.354±0.379  | 1.539±0.899  | 5.03E-09 |
| cg16173109 | 2  | 242945447 | <i>0</i>         | 2.14±0.314   | 1.268±0.981  | 5.17E-09 |
| cg26209676 | 19 | 56154382  | <i>ZNF581</i>    | -2.156±0.72  | -2.982±0.733 | 5.17E-09 |
| cg19815720 | 3  | 183770650 | <i>HTR3C</i>     | -0.098±0.245 | 0.454±0.612  | 5.18E-09 |
| cg03667047 | 13 | 33589962  | <i>KL</i>        | -1.261±0.234 | -0.458±0.911 | 5.18E-09 |
| cg14662379 | 2  | 241759279 | <i>KIF1A</i>     | -2.893±0.491 | -2.004±0.959 | 5.21E-09 |
| cg24712395 | 19 | 39234666  | <i>CAPN12</i>    | 1.4±0.244    | 1.887±0.532  | 5.21E-09 |
| cg00498305 | 10 | 119000236 | <i>SLC18A2</i>   | -1.695±0.388 | -1.11±0.604  | 5.25E-09 |
| cg19784470 | 19 | 15052011  | <i>OR7C2</i>     | 2.023±0.317  | 1.312±0.79   | 5.27E-09 |
| cg17978274 | 15 | 93013676  | <i>C15orf32</i>  | 2.833±0.215  | 2.187±0.731  | 5.27E-09 |
| cg07207789 | 16 | 84852909  | <i>CRISPLD2</i>  | 0.08±0.342   | -0.625±0.775 | 5.27E-09 |
| cg25689649 | 19 | 17336377  | <i>OCEL1</i>     | 0.167±0.218  | -0.413±0.652 | 5.29E-09 |
| cg12810837 | 12 | 9822287   | <i>CLEC2D</i>    | 0.86±0.374   | 0.164±0.755  | 5.30E-09 |
| cg23189044 | 11 | 74178114  | <i>KCNE3</i>     | -3.581±0.524 | -2.732±0.896 | 5.30E-09 |
| cg03794550 | 11 | 22646597  | <i>FANCF</i>     | -4.859±0.351 | -5.313±0.44  | 5.34E-09 |
| cg14893163 | 13 | 58206036  | <i>PCDH17</i>    | -4.06±0.419  | -3.214±0.928 | 5.34E-09 |
| cg22920873 | 7  | 139025153 | <i>C7orf55</i>   | -5.006±0.451 | -5.606±0.592 | 5.35E-09 |
| cg15202954 | 13 | 102068996 | <i>NALCN</i>     | -2.362±0.353 | -1.56±0.892  | 5.41E-09 |
| cg17122311 | 16 | 28517278  | <i>IL27</i>      | 1.424±0.257  | 1.885±0.497  | 5.47E-09 |
| cg05248781 | 1  | 152483199 | <i>LCE5A</i>     | 3.041±0.319  | 1.974±1.213  | 5.50E-09 |
| cg15660077 | 17 | 7311620   | <i>NLGN2</i>     | 1.032±0.323  | 1.618±0.634  | 5.53E-09 |
| cg19235307 | 3  | 129160154 | <i>MBD4</i>      | -2.721±0.307 | -2.009±0.795 | 5.53E-09 |
| cg09222115 | 2  | 241079766 | <i>OTOS</i>      | 0.535±0.209  | 1.133±0.675  | 5.59E-09 |
| cg11318251 | 8  | 104152588 | <i>BAALC</i>     | -1.134±0.31  | -0.435±0.778 | 5.60E-09 |
| cg08383315 | 11 | 8190565   | <i>RIC3</i>      | -4.89±0.668  | -3.453±1.592 | 5.62E-09 |
| cg07846220 | 18 | 7117680   | <i>LAMA1</i>     | -3.04±0.884  | -1.799±1.255 | 5.66E-09 |

|             |    |           |            |              |              |          |
|-------------|----|-----------|------------|--------------|--------------|----------|
| cg15361750  | 19 | 47839132  | C5AR2      | -0.662±0.253 | 0.024±0.774  | 5.69E-09 |
| cg06378617  | 17 | 39095141  | KRT23      | 0.834±0.256  | 0.015±0.931  | 5.72E-09 |
| cg25058957  | 19 | 3771683   | RAX2       | 3.597±0.39   | 2.666±1.041  | 5.72E-09 |
| cg09458237  | 20 | 3712191   | HSPA12B    | 1.732±0.3    | 1.013±0.804  | 5.72E-09 |
| cg058222100 | 5  | 31194410  | CDH6       | -3.988±0.325 | -3.034±1.08  | 5.75E-09 |
| cg07715201  | 5  | 37840839  | GDNF-AS1   | -3.626±0.407 | -2.521±1.247 | 5.75E-09 |
| cg14598387  | 9  | 125289357 | OR1N1      | -0.338±0.25  | -1.092±0.855 | 5.76E-09 |
| cg19355190  | 10 | 64575798  | EGR2       | -2.504±0.209 | -1.511±1.139 | 5.78E-09 |
| cg00912942  | 1  | 11024484  | C1orf127   | 2.984±0.271  | 3.328±0.331  | 5.78E-09 |
| cg06745740  | 7  | 81399587  | HGF        | -2.808±0.373 | -1.902±1.016 | 5.80E-09 |
| cg07443748  | 22 | 17073594  | CCT8L2     | 0.849±0.27   | 0.089±0.859  | 5.82E-09 |
| cg04425624  | 6  | 31543565  | TNF        | 0.414±0.316  | -0.374±0.885 | 5.82E-09 |
| cg02903525  | 19 | 47813489  | C5AR1      | 1.734±0.193  | 1.294±0.491  | 5.85E-09 |
| cg23580945  | 17 | 37186341  | LRRC37A11P | 2.363±0.334  | 1.625±0.821  | 5.87E-09 |
| cg08003150  | 20 | 62103627  | KCNQ2      | -5.513±0.494 | -4.07±1.636  | 5.88E-09 |
| cg14409958  | 8  | 120651652 | ENPP2      | -3.944±0.598 | -2.712±1.349 | 5.92E-09 |
| cg03504078  | 5  | 140480218 | PCDHB3     | -0.569±0.365 | 0.099±0.725  | 5.92E-09 |
| cg01040850  | 1  | 181002669 | MR1        | 0.857±0.316  | 0.184±0.746  | 5.94E-09 |
| cg14106085  | 1  | 47902269  | FOXD2      | -3.375±0.352 | -3.771±0.349 | 5.94E-09 |
| cg24888049  | 15 | 91426667  | FES        | 0.589±0.19   | 0.934±0.375  | 5.96E-09 |
| cg08763351  | 1  | 152943210 | SPRR4      | 1.913±0.376  | 0.772±1.297  | 5.96E-09 |
| cg20134151  | 6  | 150463500 | PPP1R14C   | -3.452±0.426 | -2.624±0.908 | 5.96E-09 |
| cg18877506  | 1  | 13910555  | PDPN       | -4.122±0.546 | -3.054±1.172 | 5.98E-09 |
| cg09083627  | 13 | 88324597  | SLITRK5    | -3.622±0.9   | -2.46±1.133  | 6.01E-09 |
| cg18105675  | 2  | 3642400   | COLEC11    | 0.197±0.305  | 0.891±0.774  | 6.01E-09 |
| cg24926780  | 19 | 15838895  | OR10H2     | 0.198±0.163  | -0.189±0.434 | 6.01E-09 |
| cg14481339  | 11 | 128737319 | KCNJ1      | 0.998±0.21   | 0.362±0.723  | 6.01E-09 |
| cg06403553  | 6  | 49754848  | PGK2       | 2.513±0.258  | 1.718±0.904  | 6.04E-09 |
| cg10073091  | 1  | 55352301  | DHCR24     | -2.826±0.358 | -3.282±0.442 | 6.08E-09 |
| cg18956481  | 20 | 52790139  | CYP24A1    | -3.35±0.415  | -2.151±1.36  | 6.08E-09 |
| cg09531892  | 8  | 105601835 | LRP12      | -3.299±0.428 | -2.623±0.712 | 6.10E-09 |
| cg12613344  | 11 | 47280305  | NR1H3      | 1.921±0.227  | 2.327±0.44   | 6.10E-09 |
| cg04528819  | 7  | 130418315 | KLF14      | -2.506±0.497 | -1.017±1.692 | 6.11E-09 |
| cg22575540  | 2  | 27505625  | TRIM54     | 1.534±0.255  | 1.997±0.502  | 6.11E-09 |
| cg00143998  | 1  | 228645859 | HIST3H2BB  | -4.261±0.399 | -2.814±1.656 | 6.11E-09 |
| cg22598028  | 3  | 44626492  | ZNF660     | -3.716±0.561 | -2.636±1.184 | 6.13E-09 |
| cg09306675  | 20 | 45523996  | EYA2       | -2.825±0.308 | -1.87±1.087  | 6.23E-09 |
| cg14724265  | 4  | 76823661  | PPEF2      | 0.924±0.253  | 1.481±0.621  | 6.32E-09 |
| cg22473973  | 10 | 133794911 | BNIP3      | -3.02±0.459  | -2.513±0.437 | 6.33E-09 |
| cg14070647  | 8  | 109095264 | RSPO2      | -3.4±0.403   | -2.526±0.973 | 6.38E-09 |
| cg23208881  | 15 | 91411495  | FURIN      | 2.294±0.209  | 1.541±0.863  | 6.38E-09 |
| cg02602411  | 9  | 104357177 | PPP3R2     | 1.778±0.198  | 1.217±0.638  | 6.43E-09 |
| cg10918202  | 8  | 104153173 | BAALC      | -3.549±0.511 | -2.447±1.228 | 6.43E-09 |
| cg26709720  | 21 | 41027960  | B3GALT5    | 2.585±0.428  | 1.693±0.99   | 6.46E-09 |
| cg12711814  | 1  | 8939529   | ENO1       | -4.482±0.371 | -4.913±0.394 | 6.48E-09 |
| cg11885098  | 19 | 1285397   | EFNA2      | -1.673±0.308 | -0.847±0.935 | 6.49E-09 |
| cg13673514  | 14 | 101035818 | BEGAIN     | -2.119±0.415 | -1.274±0.936 | 6.50E-09 |
| cg13975625  | 4  | 164264796 | NPY5R      | -3.503±0.333 | -2.639±0.977 | 6.51E-09 |
| cg02124291  | 19 | 14939260  | OR7A5      | 1.505±0.283  | 0.838±0.749  | 6.55E-09 |
| cg17703212  | 10 | 82117257  | DYDC2      | -1.17±0.341  | -0.508±0.729 | 6.56E-09 |
| cg08434234  | 7  | 137531173 | DGKI       | -4.948±0.49  | -3.815±1.272 | 6.56E-09 |
| cg19433435  | 11 | 125366590 | FEZ1       | -0.082±0.277 | 0.498±0.645  | 6.65E-09 |
| cg24901042  | 21 | 42880554  | TMPRSS2    | -3.681±0.392 | -3.117±0.581 | 6.81E-09 |
| cg08278554  | 15 | 45722919  | C15orf48   | -2.224±0.518 | -3.091±0.931 | 6.92E-09 |
| cg06516124  | 11 | 32450591  | WT1        | -2.83±0.595  | -1.911±0.97  | 6.96E-09 |
| cg18506679  | 9  | 127563860 | OLFML2A    | 3.36±0.211   | 3.057±0.312  | 6.96E-09 |
| cg06500476  | 4  | 37584954  | C4orf19    | 1.533±0.242  | 1.106±0.464  | 7.04E-09 |
| cg09450020  | 7  | 89841435  | STEAP2     | -5.253±0.632 | -4.311±0.984 | 7.04E-09 |
| cg21461100  | 19 | 46477338  | NOVA2      | -3.022±0.449 | -1.885±1.289 | 7.17E-09 |
| cg17797815  | 10 | 119806972 | CASC2      | 0.758±0.311  | -0.041±0.905 | 7.19E-09 |
| cg01407341  | 15 | 97326798  | SPATA8     | 3.213±0.288  | 2.609±0.675  | 7.24E-09 |
| cg01668126  | 8  | 16050740  | MSR1       | 2.017±0.319  | 1.382±0.704  | 7.24E-09 |
| cg14832904  | 2  | 54087028  | GPR75      | 0.732±0.232  | 1.48±0.858   | 7.27E-09 |
| cg11466837  | 11 | 120009682 | TRIM29     | 1.793±0.358  | 1.09±0.779   | 7.27E-09 |
| cg26620356  | 5  | 175789238 | KIAA1191   | -0.485±0.494 | -1.178±0.709 | 7.27E-09 |
| cg16660041  | 3  | 51938430  | IQCF1      | 1.89±0.243   | 1.251±0.727  | 7.27E-09 |
| cg12289045  | 19 | 51141361  | SYT3       | -0.507±0.415 | 0.23±0.803   | 7.29E-09 |
| cg05246522  | 17 | 25798973  | KSR1       | 1.022±0.385  | 0.059±1.091  | 7.34E-09 |
| cg10293925  | 7  | 38670985  | AMPH       | -3.869±0.679 | -2.635±1.351 | 7.34E-09 |
| cg00311768  | 8  | 144698857 | TSTA3      | 0.856±0.296  | 0.184±0.756  | 7.40E-09 |

|            |    |           |         |              |              |          |
|------------|----|-----------|---------|--------------|--------------|----------|
| cg18979491 | 20 | 36974445  | LBP     | -0.455±0.258 | -1.056±0.678 | 7.47E-09 |
| cg08592761 | 15 | 71146185  | LARP6   | -4.391±0.584 | -3.328±1.165 | 7.48E-09 |
| cg10895130 | 1  | 151007925 | BNIP1   | 1.977±0.275  | 2.43±0.487   | 7.56E-09 |
| cg09137696 | 16 | 56672415  | MT1A    | -3.84±0.491  | -2.898±1.04  | 7.58E-09 |
| cg10734665 | 15 | 26107410  | ATP10A  | -0.78±0.246  | -1.219±0.479 | 7.62E-09 |
| cg10515956 | 1  | 85514610  | MCOLN3  | -2.943±0.405 | -3.457±0.502 | 7.63E-09 |
| cg25084878 | 5  | 127873711 | FBN2    | -1.466±0.32  | -0.849±0.682 | 7.65E-09 |
| cg08612871 | 1  | 35220334  | GJB5    | 1.501±0.325  | 0.772±0.821  | 7.68E-09 |
| cg11201532 | 22 | 37882078  | MFNG    | -0.081±0.251 | 0.55±0.716   | 7.72E-09 |
| cg23771929 | 9  | 132934195 | NCS1    | -1.547±0.433 | -0.773±0.847 | 7.81E-09 |
| cg23922708 | 18 | 78005180  | PARD6G  | -4.245±0.615 | -3.268±1.043 | 7.82E-09 |
| cg03826976 | 11 | 7695433   | CYB5R2  | -2.688±0.386 | -1.684±1.143 | 7.84E-09 |
| cg16257091 | 11 | 27743580  | BDNF    | -3.398±0.484 | -2.58±0.885  | 7.84E-09 |
| cg25481253 | 7  | 141673384 | TAS2R38 | -1.262±0.366 | -1.885±0.673 | 7.87E-09 |
| cg06952310 | 19 | 19327990  | NCAN    | 0.152±0.325  | -0.543±0.779 | 7.97E-09 |
| cg03941108 | 1  | 22985937  | C1QB    | 1.079±0.205  | 0.412±0.769  | 8.05E-09 |
| cg01753906 | 14 | 106140190 | ELK2AP  | 1.111±0.248  | 0.772±0.346  | 8.23E-09 |
| cg22113807 | 20 | 3140865   | UBOX5   | -1.606±0.469 | -2.224±0.618 | 8.26E-09 |
| cg03366382 | 11 | 2182644   | INS     | 2.397±0.237  | 1.816±0.66   | 8.29E-09 |
| cg17788832 | 8  | 87081654  | PSKH2   | -1.089±0.24  | -0.388±0.804 | 8.31E-09 |
| cg05071677 | 5  | 180581950 | OR2V2   | 1.885±0.418  | 1.071±0.904  | 8.35E-09 |
| cg13185308 | 11 | 17498819  | ABCC8   | -0.331±0.279 | 0.157±0.533  | 8.36E-09 |
| cg23582408 | 20 | 62130111  | EEF1A2  | -4.902±0.642 | -3.779±1.226 | 8.39E-09 |
| cg13434852 | 10 | 128768181 | DOCK1   | 2.871±0.249  | 2.522±0.359  | 8.40E-09 |
| cg25553916 | 5  | 177558755 | RMND5B  | 0.473±0.146  | 0.021±0.52   | 8.41E-09 |
| cg13351161 | 8  | 27490921  | SCARA3  | -1.483±0.373 | -0.91±0.608  | 8.43E-09 |
| cg18106189 | 18 | 13218595  | LDLRAD4 | -5.58±0.79   | -4.321±1.35  | 8.44E-09 |
| cg04655481 | 9  | 125796809 | GPR21   | 0.853±0.222  | 1.249±0.434  | 8.45E-09 |
| cg15997411 | 1  | 65352384  | JAK1    | 2.946±0.275  | 3.309±0.364  | 8.54E-09 |
| cg27420236 | 2  | 154334716 | RPRM    | -3.678±0.444 | -2.731±1.065 | 8.54E-09 |
| cg22377428 | 17 | 72363882  | GPR142  | 2.587±0.2    | 2.232±0.389  | 8.57E-09 |
| cg13727946 | 19 | 8953473   | MBD3L1  | -1.921±0.377 | -2.399±0.469 | 8.60E-09 |
| cg07008386 | 20 | 8113630   | PLCB1   | -4.515±0.443 | -3.59±1.038  | 8.60E-09 |
| cg03118854 | 22 | 44288155  | PNPLA5  | -2.156±0.299 | -1.456±0.795 | 8.74E-09 |
| cg02620013 | 13 | 49794681  | MLNR    | -1.706±0.389 | -0.852±0.964 | 8.79E-09 |
| cg25900806 | 2  | 33953779  | MYADML  | 0.315±0.241  | -0.061±0.401 | 8.79E-09 |
| cg24532476 | 12 | 133424566 | CHFR    | 1.87±0.195   | 2.204±0.364  | 8.80E-09 |
| cg19378133 | 16 | 6068835   | RBFOX1  | -3.038±0.428 | -2.23±0.895  | 8.81E-09 |
| cg05365670 | 5  | 1524551   | LPCAT1  | 0.379±0.292  | -0.401±0.893 | 8.81E-09 |
| cg15403517 | 2  | 31806275  | SRD5A2  | -1.217±0.6   | -0.188±1.122 | 8.85E-09 |
| cg21165219 | 18 | 10698044  | PIEZO2  | 1.743±0.391  | 0.947±0.876  | 9.02E-09 |
| cg02330106 | 10 | 131264840 | MGMT    | 2.155±0.426  | 1.464±0.745  | 9.03E-09 |
| cg15059932 | 18 | 74535233  | ZNF236  | -3.996±0.442 | -4.582±0.591 | 9.11E-09 |
| cg23881725 | 3  | 38080642  | DLEC1   | -3.746±0.429 | -2.325±1.645 | 9.13E-09 |
| cg26833602 | 9  | 95821549  | SUSD3   | -2.47±0.4    | -3.046±0.601 | 9.18E-09 |
| cg10917602 | 16 | 30996630  | HSD3B7  | -0.177±0.239 | -0.736±0.635 | 9.20E-09 |
| cg06471905 | 17 | 42835688  | ADAM11  | -2.12±0.355  | -1.518±0.657 | 9.23E-09 |
| cg15958424 | 3  | 132036067 | ACPP    | -1.548±0.208 | -2.111±0.647 | 9.24E-09 |
| cg04582938 | 9  | 139971429 | UAP1L1  | -1.479±0.303 | -0.825±0.739 | 9.37E-09 |
| cg00579402 | 19 | 5838999   | FUT6    | 2.169±0.248  | 1.436±0.846  | 9.39E-09 |
| cg17483510 | 3  | 179168677 | GNB4    | -3.38±0.462  | -2.357±1.158 | 9.40E-09 |
| cg18595258 | 11 | 61128572  | TMEM138 | 0.498±0.253  | 0.103±0.423  | 9.46E-09 |
| cg01555431 | 6  | 151562026 | AKAP12  | -3.625±0.318 | -2.681±1.09  | 9.57E-09 |
| cg03766965 | 16 | 30718443  | SRCAP   | 0.034±0.387  | 0.557±0.528  | 9.67E-09 |
| cg10889070 | 16 | 2317379   | RNPS1   | -0.448±0.199 | -0.11±0.369  | 9.68E-09 |
| cg23166289 | 1  | 210001082 | DIEXF   | -1.421±0.597 | -2.466±1.148 | 9.70E-09 |
| cg14338887 | 6  | 42928500  | GNMT    | -3.374±0.637 | -2.533±0.85  | 9.75E-09 |
| cg00095526 | 1  | 201081686 | CACNA1S | 0.939±0.189  | 1.353±0.469  | 9.83E-09 |
| cg06785429 | 3  | 182699414 | DCUN1D1 | -0.311±0.21  | 0.271±0.67   | 9.84E-09 |
| cg12941369 | 3  | 33839389  | PDCD6IP | -1.295±0.234 | -1.667±0.401 | 9.85E-09 |
| cg24356544 | 10 | 50970863  | OGDHL   | 1.432±0.423  | 1.895±0.409  | 9.87E-09 |
| cg20103758 | 5  | 128300696 | SLC27A6 | -2.735±0.242 | -1.899±0.972 | 9.87E-09 |
| cg00135056 | 3  | 128997295 | C3orf37 | -3.209±0.292 | -2.731±0.518 | 9.90E-09 |
| cg09691574 | 11 | 18193674  | MRGPRX4 | 2.291±0.184  | 1.592±0.815  | 9.90E-09 |
| cg09588653 | 5  | 149569276 | SLC6A7  | 0.595±0.251  | -0.013±0.695 | 9.93E-09 |
| cg08453021 | 7  | 37488575  | ELMO1   | -4.293±0.382 | -2.881±1.646 | 9.97E-09 |
| cg00290506 | 1  | 224804226 | CNIH3   | -4.8±0.801   | -3.378±1.569 | 1.00E-08 |
| cg15501381 | 14 | 77737800  | NGB     | -0.238±0.28  | 0.407±0.736  | 1.01E-08 |
| cg15640375 | 19 | 821565    | LPPR3   | -2.691±0.473 | -1.932±0.82  | 1.01E-08 |
| cg13401339 | 2  | 24272928  | FKBP1B  | -4.403±0.353 | -3.787±0.678 | 1.01E-08 |

|            |    |           |            |              |              |          |
|------------|----|-----------|------------|--------------|--------------|----------|
| cg14948436 | 6  | 39290159  | KCNK16     | 2.672±0.174  | 2.312±0.405  | 1.02E-08 |
| cg01579216 | 1  | 183560913 | NCF2       | 1.587±0.367  | 2.057±0.469  | 1.02E-08 |
| cg04375036 | 12 | 111181819 | PPP1CC     | 1.88±0.286   | 2.381±0.553  | 1.03E-08 |
| cg08221207 | 11 | 125366421 | FEZ1       | -3.733±0.4   | -3.149±0.616 | 1.03E-08 |
| cg15742700 | 8  | 11350853  | BLK        | 1.629±0.309  | 1.074±0.615  | 1.05E-08 |
| cg27234090 | 11 | 119251854 | USP2       | -1.92±0.289  | -2.489±0.639 | 1.05E-08 |
| cg25193494 | 16 | 90016004  | DEF8       | 0.519±0.378  | 1.077±0.589  | 1.05E-08 |
| cg09052983 | 18 | 52495605  | RAB27B     | -4.35±0.302  | -3.888±0.494 | 1.06E-08 |
| cg17913068 | 11 | 70116114  | PPFIA1     | -3.733±0.286 | -4.096±0.36  | 1.06E-08 |
| cg01970325 | 9  | 140354241 | NSMF       | 0.638±0.279  | 0.167±0.516  | 1.06E-08 |
| cg05922591 | 19 | 55174624  | LILRB4     | 2.991±0.244  | 2.535±0.508  | 1.06E-08 |
| cg07546360 | 22 | 46482023  | MIRLET7BHG | -0.834±0.294 | -0.141±0.794 | 1.07E-08 |
| cg03029616 | 21 | 31986034  | KRTAP6-1   | 2.354±0.229  | 1.604±0.873  | 1.07E-08 |
| cg21621248 | 2  | 80531842  | LRRTM1     | -3.501±0.414 | -2.691±0.911 | 1.10E-08 |
| cg13546796 | 4  | 71108659  | CSN3       | 0.475±0.416  | 0.937±0.403  | 1.11E-08 |
| cg21514871 | 16 | 3307814   | MEFV       | -0.903±0.328 | -1.602±0.794 | 1.12E-08 |
| cg06039392 | 4  | 187476953 | MTNR1A     | -0.77±0.282  | -0.201±0.643 | 1.14E-08 |
| cg06677140 | 4  | 4862015   | MSX1       | -4.375±0.412 | -3.327±1.207 | 1.14E-08 |
| cg16220183 | 17 | 56609687  | 42617      | -3.561±0.355 | -2.779±0.892 | 1.14E-08 |
| cg27478659 | 17 | 39769012  | KRT16      | 0.434±0.154  | 0.002±0.501  | 1.14E-08 |
| cg22218909 | 8  | 6876386   | DEFA1B     | 3.006±0.151  | 2.483±0.611  | 1.14E-08 |
| cg20015689 | 20 | 43835190  | SEMG1      | -0.317±0.258 | -1.012±0.795 | 1.14E-08 |
| cg27126442 | 4  | 106473806 | ARHGEF38   | -0.163±0.337 | -0.828±0.749 | 1.14E-08 |
| cg07711097 | 8  | 143915954 | GML        | 2.177±0.306  | 1.517±0.751  | 1.15E-08 |
| cg14519134 | 3  | 129261830 | H1FOO      | 3.073±0.205  | 2.809±0.265  | 1.15E-08 |
| cg12547930 | 20 | 44168753  | WFDC6      | 1.837±0.239  | 1.13±0.814   | 1.15E-08 |
| cg08917718 | 3  | 52002169  | PCBP4      | -3.834±0.436 | -3.275±0.561 | 1.15E-08 |
| cg19570545 | 1  | 201252472 | PKP1       | -5.282±0.541 | -4.357±1.019 | 1.17E-08 |
| cg06621126 | 16 | 67198243  | HSF4       | -4.553±0.491 | -3.345±1.391 | 1.17E-08 |
| cg21096915 | 10 | 42971209  | LINC00839  | -1.857±0.478 | -1.032±0.911 | 1.18E-08 |
| cg09457245 | 12 | 54778750  | ZNF385A    | 1.229±0.272  | 0.769±0.507  | 1.19E-08 |
| cg15827031 | 5  | 37371628  | NUP155     | -4.178±0.417 | -3.065±1.289 | 1.19E-08 |
| cg07452799 | 10 | 35103869  | PARD3      | -4.456±0.676 | -3.592±0.866 | 1.19E-08 |
| cg22152192 | 16 | 21315153  | CRYM       | 1.258±0.393  | 1.739±0.456  | 1.20E-08 |
| cg03301801 | 1  | 109264283 | FNDC7      | 2.049±0.242  | 1.372±0.778  | 1.20E-08 |
| cg02930996 | 18 | 29265842  | B4GALT6    | -3.486±0.356 | -2.617±1.002 | 1.21E-08 |
| cg04988423 | 11 | 44331577  | ALX4       | -4.746±0.643 | -3.261±1.704 | 1.21E-08 |
| cg14826456 | 10 | 115804095 | ADRB1      | -1.349±0.428 | -0.681±0.723 | 1.22E-08 |
| cg26450866 | 19 | 49576241  | KCNA7      | -4.359±0.554 | -3.389±1.076 | 1.22E-08 |
| cg15770654 | 1  | 12078821  | MIIP       | 3.42±0.228   | 2.485±1.1    | 1.22E-08 |
| cg06550629 | 12 | 131439172 | GPR133     | 0.572±0.324  | -0.166±0.847 | 1.23E-08 |
| cg22805517 | 7  | 42951105  | C7orf25    | -4.68±0.457  | -3.996±0.733 | 1.23E-08 |
| cg18896687 | 7  | 1571125   | MAFK       | -4.897±0.349 | -5.306±0.388 | 1.24E-08 |
| cg22362636 | 4  | 2758447   | TNIP2      | -3.463±0.384 | -2.815±0.715 | 1.25E-08 |
| cg25021247 | 3  | 49460162  | AMT        | 0.082±0.253  | 0.468±0.415  | 1.26E-08 |
| cg21824213 | 15 | 40886047  | CASC5      | -5.063±0.645 | -3.901±1.297 | 1.26E-08 |
| cg14896516 | 7  | 30722361  | CRHR2      | -5.092±0.563 | -3.666±1.651 | 1.27E-08 |
| cg11328149 | 6  | 31689459  | LY6G6C     | 2.135±0.189  | 1.842±0.316  | 1.28E-08 |
| cg09019938 | 10 | 52834498  | PRKG1      | -4.362±0.434 | -3.633±0.803 | 1.28E-08 |
| cg08164315 | 5  | 40679182  | PTGER4     | -4.37±0.428  | -4.939±0.584 | 1.28E-08 |
| cg18172186 | 6  | 130758314 | TMEM200A   | 2.625±0.219  | 1.759±1.021  | 1.28E-08 |
| cg27081230 | 16 | 50715529  | SNX20      | 1.065±0.341  | 0.382±0.774  | 1.29E-08 |
| cg16773899 | 5  | 83680326  | EDIL3      | -3.364±0.586 | -2.43±1.017  | 1.29E-08 |
| cg17771150 | 13 | 46756209  | LCP1       | 0.336±0.397  | -0.499±0.952 | 1.29E-08 |
| cg01988129 | 8  | 67344936  | ADHFE1     | -2.435±0.619 | -1.334±1.227 | 1.29E-08 |
| cg08696192 | 17 | 38657310  | TNS4       | 2.392±0.291  | 1.621±0.894  | 1.29E-08 |
| cg22284975 | 7  | 40174843  | C7orf10    | -3.729±0.29  | -3.145±0.663 | 1.30E-08 |
| cg01795161 | 7  | 87506981  | SLC25A40   | -1.154±0.308 | -1.744±0.658 | 1.30E-08 |
| cg27043873 | 5  | 19981429  | CDH18      | 2.016±0.278  | 1.129±1.039  | 1.30E-08 |
| cg25165880 | 1  | 6454326   | ACOT7      | -2.551±0.284 | -2.966±0.441 | 1.31E-08 |
| cg11577097 | 15 | 58430682  | AQP9       | -1.207±0.325 | -1.799±0.662 | 1.31E-08 |
| cg22354595 | 19 | 57351440  | PEG3       | 0.823±0.253  | 1.347±0.597  | 1.31E-08 |
| cg02477931 | 11 | 131532721 | NTM        | 1.784±0.234  | 0.826±1.131  | 1.33E-08 |
| cg07310951 | 19 | 57350503  | PEG3       | 0.554±0.114  | 0.261±0.34   | 1.33E-08 |
| cg20256783 | 12 | 52827847  | KRT75      | 2.682±0.329  | 2.158±0.571  | 1.33E-08 |
| cg21942576 | 1  | 46126885  | GPBP1L1    | 0.272±0.35   | 0.705±0.431  | 1.34E-08 |
| cg13899108 | 19 | 18344322  | PDE4C      | -0.144±0.206 | 0.578±0.85   | 1.38E-08 |
| cg21291985 | 20 | 62437035  | ZBTB46     | 0.874±0.298  | 1.303±0.455  | 1.38E-08 |
| cg12563178 | 10 | 20105641  | PLXDC2     | -4.454±0.663 | -3.536±0.962 | 1.38E-08 |
| cg13562911 | 6  | 11044106  | ELOVL2-AS1 | -4.499±0.509 | -3.231±1.47  | 1.38E-08 |

|            |    |           |              |              |              |          |
|------------|----|-----------|--------------|--------------|--------------|----------|
| cg14894216 | 11 | 65794352  | CATSPER1     | 0.381±0.338  | -0.285±0.757 | 1.41E-08 |
| cg20015855 | 15 | 68937562  | CORO2B       | 3.45±0.343   | 2.923±0.572  | 1.42E-08 |
| cg27019278 | 4  | 101438804 | EMCN         | -0.366±0.224 | 0.3±0.781    | 1.42E-08 |
| cg19461621 | 18 | 500979    | COLEC12      | -3.615±0.504 | -2.798±0.899 | 1.42E-08 |
| cg10432620 | 16 | 74808963  | FA2H         | -4.271±0.342 | -4.686±0.408 | 1.43E-08 |
| cg23191950 | 15 | 101419074 | ALDH1A3      | -0.421±0.298 | 0.127±0.616  | 1.43E-08 |
| cg19395441 | 12 | 121454451 | C12orf43     | -3.317±0.279 | -3.707±0.411 | 1.44E-08 |
| cg20867633 | 1  | 204183116 | GOLT1A       | -2.86±0.467  | -3.416±0.54  | 1.44E-08 |
| cg22424108 | 1  | 95285531  | SLC44A3      | -2.596±0.349 | -3.101±0.539 | 1.45E-08 |
| cg09328024 | 1  | 206808174 | DYRK3        | -2.925±0.282 | -2.069±1.006 | 1.48E-08 |
| cg21970438 | 6  | 167738277 | TTLL2        | 2.652±0.328  | 2.122±0.583  | 1.49E-08 |
| cg11504897 | 6  | 6007412   | NRN1         | -2.539±0.284 | -1.789±0.875 | 1.50E-08 |
| cg25229964 | 1  | 26503623  | CNKSR1       | 2.312±0.234  | 1.804±0.585  | 1.51E-08 |
| cg01262913 | 21 | 38580486  | DSCR9        | -2.171±0.444 | -2.825±0.702 | 1.51E-08 |
| cg23749046 | 1  | 110082924 | GPR61        | 2.393±0.29   | 1.932±0.505  | 1.51E-08 |
| cg15783800 | 18 | 56246997  | ALPK2        | 2.509±0.319  | 1.946±0.631  | 1.51E-08 |
| cg12791465 | 8  | 133093721 | HHLA1        | 1.205±0.148  | 1.023±0.182  | 1.52E-08 |
| cg17204100 | 2  | 131357715 | CFC1B        | 3.619±0.321  | 2.614±1.183  | 1.52E-08 |
| cg22940152 | 20 | 62669102  | LINC00176    | -0.481±0.166 | -0.847±0.422 | 1.52E-08 |
| cg22198623 | 16 | 56701868  | MT1G         | -3.108±0.359 | -2.373±0.841 | 1.53E-08 |
| cg15417244 | 12 | 41831558  | PDZRN4       | 1.418±0.278  | 1.92±0.565   | 1.53E-08 |
| cg11459714 | 19 | 51520658  | KLK10        | -3.6±0.434   | -2.783±0.925 | 1.53E-08 |
| cg23519969 | 3  | 39371797  | CCR8         | 2.674±0.234  | 2.312±0.395  | 1.53E-08 |
| cg10465696 | 11 | 124767948 | ROBO4        | -0.085±0.281 | 0.517±0.692  | 1.53E-08 |
| cg20585500 | 11 | 64703192  | GPHA2        | 1.962±0.192  | 2.261±0.326  | 1.53E-08 |
| cg12413566 | 3  | 39235366  | XIRP1        | 2.854±0.33   | 2.403±0.472  | 1.54E-08 |
| cg26415633 | 19 | 51327356  | KLK1         | -0.511±0.254 | -1.178±0.78  | 1.54E-08 |
| cg22392708 | 17 | 39093770  | KRT23        | -1.583±0.29  | -0.839±0.869 | 1.54E-08 |
| cg25488021 | 6  | 131277447 | EPB41L2      | 2.785±0.193  | 2.262±0.612  | 1.55E-08 |
| cg07310661 | 2  | 225449833 | CUL3         | -3.059±0.478 | -2.55±0.449  | 1.56E-08 |
| cg06938878 | 11 | 15094364  | CALCB        | 3.066±0.478  | 2.201±0.974  | 1.56E-08 |
| cg01883966 | 6  | 31938886  | STK19        | 3.24±0.296   | 2.391±0.997  | 1.56E-08 |
| cg15081561 | 18 | 66504226  | CCDC102B     | 2.584±0.211  | 1.939±0.759  | 1.57E-08 |
| cg02655204 | 13 | 49040050  | RB1          | 1.125±0.17   | 0.883±0.258  | 1.58E-08 |
| cg06119575 | 9  | 108424905 | TAL2         | 2.037±0.415  | 1.221±0.931  | 1.58E-08 |
| cg10000775 | 4  | 186456556 | PDLIM3       | -3.725±0.472 | -3.093±0.657 | 1.59E-08 |
| cg23662675 | 20 | 45985596  | ZMYND8       | -4.93±0.527  | -5.51±0.532  | 1.59E-08 |
| cg09196959 | 6  | 30104440  | TRIM40       | -0.147±0.378 | -0.98±0.963  | 1.61E-08 |
| cg27336379 | 1  | 76078230  | SLC44A5      | 2.304±0.237  | 1.62±0.805   | 1.62E-08 |
| cg27462160 | 16 | 89768630  | SPATA2L      | -3.519±0.317 | -3.85±0.287  | 1.63E-08 |
| cg23780947 | 1  | 54304852  | NDC1         | -1.975±0.341 | -1.222±0.871 | 1.64E-08 |
| cg25368651 | 11 | 6518287   | DNHD1        | 2.344±0.328  | 2.824±0.516  | 1.64E-08 |
| cg14494313 | 8  | 18248453  | NAT2         | 2.172±0.237  | 1.831±0.365  | 1.66E-08 |
| cg20352371 | 12 | 41831595  | PDZRN4       | 1.057±0.315  | 1.552±0.544  | 1.66E-08 |
| cg08806153 | 2  | 176971961 | HOXD11       | -3.976±0.545 | -3.016±1.079 | 1.66E-08 |
| cg25713185 | 2  | 228582486 | SLC19A3      | -2.785±0.374 | -2.181±0.667 | 1.67E-08 |
| cg24723331 | 12 | 22487219  | ST8SIA1      | -4.669±0.416 | -3.586±1.269 | 1.68E-08 |
| cg14506552 | 1  | 11918954  | NPPB         | -1.317±0.473 | -0.583±0.803 | 1.68E-08 |
| cg12967560 | 15 | 100274195 | LYSMD4       | 2.799±0.255  | 1.778±1.215  | 1.69E-08 |
| cg12005098 | 10 | 91295338  | SLC16A12     | -4.674±0.754 | -3.368±1.466 | 1.70E-08 |
| cg19591881 | 1  | 208084640 | CD34         | -3.677±0.396 | -2.736±1.096 | 1.71E-08 |
| cg26523005 | 3  | 42947267  | ZNF662       | 0.579±0.201  | 1.003±0.49   | 1.72E-08 |
| cg22285621 | 11 | 67071322  | SSH3         | -2.577±1.158 | -1.335±1.113 | 1.72E-08 |
| cg16413777 | 17 | 48555933  | RSAD1        | -4.381±0.421 | -4.807±0.355 | 1.73E-08 |
| cg23625458 | 1  | 19600141  | AKR7L        | 3.157±0.423  | 3.621±0.427  | 1.73E-08 |
| cg12891678 | 1  | 153015281 | 0            | 0.279±0.171  | -0.401±0.811 | 1.73E-08 |
| cg11200929 | 15 | 78632670  | CRABP1       | -3.862±0.428 | -2.748±1.306 | 1.73E-08 |
| cg23047271 | 3  | 64210991  | PRICKLE2     | -1.613±0.299 | -0.703±1.075 | 1.74E-08 |
| cg05241571 | 19 | 35981224  | KRTDAP       | 2.63±0.377   | 1.729±1.052  | 1.75E-08 |
| cg07440877 | 13 | 24523079  | ANKRD20A19P  | 3.155±0.375  | 2.686±0.474  | 1.75E-08 |
| cg01913908 | 3  | 102154676 | ZPLD1        | 1.963±0.257  | 1.663±0.291  | 1.75E-08 |
| cg16507522 | 14 | 95077557  | SERPINA3     | 1.562±0.256  | 0.661±1.071  | 1.75E-08 |
| cg00518911 | 7  | 27221304  | HOXA10-HOXA9 | 0.273±0.378  | 0.898±0.69   | 1.76E-08 |
| cg03854071 | 19 | 19626428  | TSSK6        | 4.207±0.374  | 3.297±1.063  | 1.76E-08 |
| cg16899036 | 19 | 19052705  | HOMER3       | 0.413±0.189  | 0.866±0.529  | 1.77E-08 |
| cg15121304 | 22 | 22380100  | 0            | 2.247±0.179  | 1.891±0.409  | 1.79E-08 |
| cg20300655 | 5  | 134303572 | CATSPER3     | 2.015±0.258  | 1.259±0.893  | 1.79E-08 |
| cg07665060 | 19 | 38794598  | C19orf33     | -0.02±0.357  | -0.609±0.657 | 1.80E-08 |
| cg01797527 | 20 | 6749480   | BMP2         | -4.568±0.576 | -3.842±0.739 | 1.81E-08 |
| cg08107272 | 2  | 79739942  | CTNNA2       | -3.316±0.581 | -2.449±0.942 | 1.81E-08 |

|            |    |           |           |              |              |          |
|------------|----|-----------|-----------|--------------|--------------|----------|
| cg23029193 | 5  | 38258216  | EGFLAM    | -4.154±0.431 | -3.319±0.957 | 1.82E-08 |
| cg14366490 | 19 | 17571825  | NXNL1     | 0.72±0.311   | 0.129±0.676  | 1.83E-08 |
| cg21210789 | 8  | 143545390 | BAI1      | -1.654±0.304 | -2.117±0.507 | 1.84E-08 |
| cg09950370 | 8  | 21609373  | GFRA2     | 3±0.271      | 2.508±0.558  | 1.85E-08 |
| cg17178336 | 2  | 219925246 | IHH       | -3.792±0.447 | -2.987±0.912 | 1.87E-08 |
| cg22461835 | 8  | 26723365  | ADRA1A    | -3.239±0.433 | -2.27±1.128  | 1.87E-08 |
| cg14951292 | 16 | 4525986   | HMOX2     | 0.257±0.436  | -0.514±0.871 | 1.87E-08 |
| cg20028470 | 2  | 27530829  | UCN       | -0.336±0.183 | 0.063±0.462  | 1.88E-08 |
| cg11688469 | 1  | 201391061 | TNNI1     | 2.003±0.224  | 1.678±0.351  | 1.90E-08 |
| cg20789620 | 19 | 4304334   | FSD1      | 0.717±0.189  | 0.144±0.68   | 1.91E-08 |
| cg26215428 | 4  | 88928251  | PKD2      | 1.169±0.193  | 1.613±0.519  | 1.94E-08 |
| cg01446692 | 9  | 14723496  | CER1      | 0.359±0.238  | 0.886±0.613  | 1.95E-08 |
| cg25437385 | 1  | 234040833 | SLC35F3   | -3.264±0.693 | -2.125±1.272 | 1.95E-08 |
| cg26457013 | 19 | 55740188  | TMEM86B   | 2.191±0.314  | 2.65±0.498   | 1.96E-08 |
| cg09340639 | 1  | 157789662 | FCRL1     | -1.482±0.283 | -2.236±0.889 | 1.97E-08 |
| cg24459563 | 17 | 65040609  | CACNG1    | 1.839±0.274  | 2.169±0.329  | 1.97E-08 |
| cg13692433 | 11 | 112832159 | NCAM1     | -5.05±0.357  | -3.89±1.381  | 1.97E-08 |
| cg11801011 | 19 | 51220537  | SHANK1    | 0.686±0.207  | 0.185±0.588  | 1.98E-08 |
| cg07974303 | 8  | 6783987   | DEFA6     | 1.595±0.225  | 1.054±0.634  | 1.98E-08 |
| cg00208830 | 1  | 183154778 | LAMC2     | 1.266±0.306  | 0.534±0.858  | 2.00E-08 |
| cg21842478 | 17 | 46806046  | HOXB13    | -4.969±0.553 | -3.441±1.809 | 2.01E-08 |
| cg22495124 | 17 | 64873528  | CACNG5    | 3.326±0.203  | 2.672±0.779  | 2.02E-08 |
| cg10226546 | 20 | 50158996  | NFATC2    | -2.001±0.425 | -2.539±0.55  | 2.02E-08 |
| cg16232126 | 2  | 108603005 | SLC5A7    | -2.82±0.48   | -1.865±1.101 | 2.03E-08 |
| cg05595345 | 15 | 98504173  | ARRDC4    | -3.705±0.97  | -2.528±1.178 | 2.03E-08 |
| cg14620221 | 11 | 124310939 | OR8B8     | 1.738±0.309  | 0.963±0.913  | 2.04E-08 |
| cg12271671 | 7  | 76829059  | FGL2      | -2.849±0.414 | -1.895±1.117 | 2.05E-08 |
| cg19510698 | 15 | 101421249 | ALDH1A3   | 0.927±0.258  | 1.29±0.389   | 2.05E-08 |
| cg05755354 | 10 | 14372596  | FRMD4A    | 1.443±0.258  | 1.943±0.575  | 2.05E-08 |
| cg06585690 | 4  | 71262957  | PROL1     | 0.015±0.311  | -0.485±0.545 | 2.05E-08 |
| cg18230771 | 15 | 89347176  | ACAN      | -4.659±0.501 | -3.735±1.055 | 2.06E-08 |
| cg22407458 | 6  | 35109121  | TCP11     | -0.287±0.337 | 0.454±0.865  | 2.08E-08 |
| cg19255783 | 4  | 84035953  | PLAC8     | -1.264±0.35  | -1.814±0.61  | 2.08E-08 |
| cg08007665 | 11 | 2593857   | KCNQ1     | 1.961±0.282  | 1.501±0.514  | 2.11E-08 |
| cg06499652 | 11 | 13299410  | ARNTL     | -3.471±0.414 | -2.968±0.505 | 2.11E-08 |
| cg03387723 | 1  | 41708464  | SCMH1     | 2.259±0.349  | 1.506±0.878  | 2.11E-08 |
| cg26294551 | 3  | 194120827 | GP5       | 2.703±0.362  | 2.072±0.715  | 2.12E-08 |
| cg23886551 | 14 | 105992619 | TMEM121   | -5.008±0.561 | -3.886±1.297 | 2.12E-08 |
| cg14804557 | 14 | 106139591 | ELK2AP    | 2.657±0.27   | 2.184±0.536  | 2.12E-08 |
| cg12694555 | 2  | 170366463 | KLHL41    | 1.318±0.32   | 1.705±0.383  | 2.13E-08 |
| cg19118533 | 6  | 111927323 | TRAF3IP2  | -4.014±0.393 | -4.436±0.383 | 2.13E-08 |
| cg01907837 | 6  | 37321337  | RNF8      | 0.708±0.389  | -0.021±0.837 | 2.14E-08 |
| cg10171125 | 8  | 27850315  | SCARA5    | -3.606±0.384 | -2.586±1.208 | 2.17E-08 |
| cg15448245 | 22 | 24641654  | GGT5      | -0.326±0.266 | 0.19±0.596   | 2.18E-08 |
| cg20329958 | 8  | 67090250  | CRH       | -2.802±0.516 | -2.044±0.827 | 2.19E-08 |
| cg00620024 | 9  | 127952891 | PPP6C     | 1.287±0.281  | 0.591±0.821  | 2.19E-08 |
| cg13438834 | 22 | 45706530  | FAM118A   | -4.486±0.446 | -3.621±0.997 | 2.20E-08 |
| cg04048249 | 11 | 116700556 | APOC3     | 1.117±0.225  | 0.64±0.556   | 2.20E-08 |
| cg00342530 | 9  | 130027020 | GARNL3    | 0.046±0.181  | 0.385±0.39   | 2.23E-08 |
| cg05399697 | 2  | 96610206  | 0         | 1.322±0.279  | 0.871±0.505  | 2.28E-08 |
| cg22792910 | 2  | 70009351  | ANXA4     | -0.825±0.314 | -1.321±0.543 | 2.28E-08 |
| cg04749372 | 7  | 30791871  | INMT      | 0.251±0.181  | 0.683±0.509  | 2.31E-08 |
| cg27651218 | 14 | 93813520  | COX8C     | 4.501±0.45   | 3.334±1.385  | 2.32E-08 |
| cg08505473 | 14 | 94255513  | PRIMA1    | -4.974±0.535 | -3.892±1.257 | 2.33E-08 |
| cg18081313 | 12 | 132378192 | ULK1      | 2.208±0.247  | 2.554±0.373  | 2.34E-08 |
| cg03038672 | 16 | 3062056   | CLDN9     | 0.654±0.309  | 0.075±0.667  | 2.43E-08 |
| cg17142183 | 2  | 102608192 | IL1R2     | 1.236±0.375  | 0.273±1.143  | 2.47E-08 |
| cg17791936 | 11 | 118902213 | SLC37A4   | 2.097±0.263  | 1.55±0.64    | 2.53E-08 |
| cg19167673 | 22 | 39640835  | PDGFB     | -4.615±0.517 | -3.918±0.743 | 2.53E-08 |
| cg13849691 | 10 | 114133304 | ACSL5     | 3.023±0.396  | 2.272±0.869  | 2.55E-08 |
| cg14696820 | 1  | 152800168 | LCE1A     | 0.296±0.18   | -0.401±0.841 | 2.56E-08 |
| cg26833169 | 11 | 14994045  | CALCA     | -2.999±0.338 | -2.491±0.563 | 2.58E-08 |
| cg11563860 | 3  | 2141937   | CNTN4     | -1.597±0.229 | -0.999±0.713 | 2.60E-08 |
| cg25095814 | 2  | 202098016 | CASP8     | -2.856±0.449 | -3.375±0.512 | 2.61E-08 |
| cg18182399 | 2  | 220283175 | DES       | -2.707±0.67  | -1.634±1.206 | 2.61E-08 |
| cg17233506 | 17 | 46608293  | HOXB1     | 0.179±0.326  | 0.967±0.934  | 2.62E-08 |
| cg10365880 | 10 | 102089681 | PKD2L1    | 2.426±0.322  | 1.795±0.734  | 2.62E-08 |
| cg04713521 | 9  | 132428538 | PRRX2     | -3.997±0.678 | -2.985±1.119 | 2.62E-08 |
| cg20134215 | 6  | 100441407 | LOC728012 | -2.312±0.403 | -1.624±0.783 | 2.62E-08 |
| cg13656062 | 19 | 16008723  | CYP4F2    | 2.729±0.283  | 2.182±0.636  | 2.63E-08 |

|            |    |           |                  |              |              |          |
|------------|----|-----------|------------------|--------------|--------------|----------|
| cg09257092 | 12 | 26986805  | <i>ITPR2</i>     | -4.743±0.322 | -5.078±0.297 | 2.66E-08 |
| cg00509616 | 15 | 57884415  | <i>GCOM1</i>     | -2.564±0.536 | -1.925±0.642 | 2.66E-08 |
| cg26018901 | 4  | 47840011  | <i>CORIN</i>     | -2.312±0.32  | -2.856±0.619 | 2.67E-08 |
| cg05480532 | 4  | 68830216  | <i>TMPRSS11A</i> | 1.572±0.249  | 1.277±0.295  | 2.67E-08 |
| cg06501084 | 14 | 63568195  | <i>KCNH5</i>     | 0.266±0.28   | -0.378±0.755 | 2.68E-08 |
| cg14634738 | 3  | 50126100  | <i>RBM5</i>      | -2.722±0.401 | -3.173±0.436 | 2.68E-08 |
| cg19241311 | 20 | 30028893  | <i>DEFB123</i>   | 0.891±0.36   | 0.055±0.989  | 2.70E-08 |
| cg23287547 | 15 | 52820479  | <i>MYO5A</i>     | -4.606±0.394 | -3.817±0.921 | 2.70E-08 |
| cg23152772 | 9  | 133813632 | <i>FIBCD1</i>    | -2.407±0.292 | -1.818±0.689 | 2.70E-08 |
| cg02377083 | 3  | 42851019  | <i>ACKR2</i>     | 3.107±0.317  | 2.049±1.277  | 2.72E-08 |
| cg08797471 | 9  | 90113120  | <i>DAPK1</i>     | -2.642±0.546 | -1.95±0.719  | 2.72E-08 |
| cg17961200 | 9  | 135937572 | <i>CEL</i>       | 3.155±0.331  | 2.745±0.421  | 2.73E-08 |
| cg15662251 | 1  | 26197855  | <i>PAQR7</i>     | -0.614±0.246 | 0.06±0.807   | 2.75E-08 |
| cg27138584 | 2  | 47796781  | <i>KCNK12</i>    | -3.858±0.47  | -2.841±1.198 | 2.76E-08 |
| cg03583857 | 1  | 208085022 | <i>CD34</i>      | 0.434±0.295  | 1.028±0.695  | 2.77E-08 |
| cg00916635 | 1  | 114414312 | <i>PTPN22</i>    | 0.895±0.412  | -0.102±1.186 | 2.80E-08 |
| cg23713742 | 20 | 34202721  | <i>SPAG4</i>     | 1.417±0.278  | 0.718±0.834  | 2.81E-08 |
| cg15479752 | 19 | 35940862  | <i>FFAR2</i>     | 3.133±0.338  | 1.965±1.411  | 2.81E-08 |
| cg22577136 | 1  | 206644165 | <i>IKBKE</i>     | -5.174±0.612 | -5.82±0.589  | 2.83E-08 |
| cg01432087 | 11 | 67242162  | <i>0</i>         | 0.332±0.312  | -0.194±0.599 | 2.83E-08 |
| cg19208681 | 17 | 56769628  | <i>TEX14</i>     | 0.418±0.367  | -0.253±0.775 | 2.83E-08 |
| cg24798047 | 1  | 204183655 | <i>GOLT1A</i>    | -0.257±0.198 | 0.373±0.759  | 2.83E-08 |
| cg00331237 | 12 | 77273319  | <i>CSRP2</i>     | -4.301±0.481 | -3.777±0.493 | 2.84E-08 |
| cg03882305 | 7  | 72439946  | <i>LOC541473</i> | 0.231±0.554  | 0.967±0.784  | 2.84E-08 |
| cg20630151 | 3  | 138823086 | <i>BPESC1</i>    | 2.08±0.359   | 1.342±0.865  | 2.85E-08 |
| cg26847490 | 7  | 95115289  | <i>ASB4</i>      | -0.428±0.279 | 0.235±0.781  | 2.88E-08 |
| cg03568064 | 11 | 45907500  | <i>MAPK8IP1</i>  | -3.369±0.436 | -2.599±0.885 | 2.88E-08 |
| cg03945021 | 16 | 24682074  | <i>0</i>         | -2.273±0.403 | -1.612±0.75  | 2.88E-08 |
| cg19751300 | 18 | 44336399  | <i>ST8SIA5</i>   | -3.39±0.392  | -2.345±1.252 | 2.88E-08 |
| cg07384961 | 16 | 3068128   | <i>CLDN6</i>     | -2.994±0.401 | -2.135±1.013 | 2.89E-08 |
| cg04713352 | 19 | 36055013  | <i>ATP4A</i>     | -0.218±0.261 | -0.824±0.72  | 2.89E-08 |
| cg08837884 | 19 | 4540782   | <i>LRG1</i>      | 0.566±0.326  | 1.061±0.546  | 2.89E-08 |
| cg03642357 | 22 | 25960278  | <i>ADRBK2</i>    | -3.836±0.31  | -3.435±0.422 | 2.91E-08 |
| cg10648113 | 4  | 70627751  | <i>SULT1B1</i>   | 3.42±0.421   | 2.883±0.563  | 2.92E-08 |
| cg02870945 | 2  | 86565124  | <i>REEP1</i>     | -2.252±0.403 | -2.827±0.629 | 2.93E-08 |
| cg21459867 | 4  | 981492    | <i>IDUA</i>      | 1.081±0.192  | 0.675±0.477  | 2.93E-08 |
| cg14460735 | 1  | 246728727 | <i>TFB2M</i>     | -0.825±0.326 | -1.321±0.554 | 2.93E-08 |
| cg21669679 | 18 | 49866548  | <i>DCC</i>       | -3.597±0.563 | -2.743±0.953 | 2.96E-08 |
| cg19632760 | 8  | 71581729  | <i>XKR9</i>      | -0.381±0.154 | -0.809±0.514 | 2.96E-08 |
| cg11546621 | 9  | 139872161 | <i>PTGDS</i>     | 0.656±0.219  | 1.02±0.415   | 2.98E-08 |
| cg14975238 | 7  | 97841591  | <i>BHLHA15</i>   | 2.544±0.16   | 2.333±0.226  | 2.99E-08 |
| cg23744433 | 1  | 67390759  | <i>MIER1</i>     | -3.092±0.317 | -2.704±0.399 | 2.99E-08 |
| cg08612037 | 12 | 107712210 | <i>BTBD11</i>    | -4.289±0.355 | -3.506±0.927 | 2.99E-08 |
| cg20029652 | 6  | 28249545  | <i>PGBD1</i>     | -4.416±0.33  | -3.697±0.851 | 3.00E-08 |
| cg21073927 | 8  | 11562155  | <i>GATA4</i>     | -3.33±0.307  | -2.474±1.028 | 3.00E-08 |
| cg23352747 | 1  | 21835436  | <i>ALPL</i>      | -3.919±0.412 | -3.433±0.488 | 3.00E-08 |
| cg20249919 | 15 | 102029706 | <i>PCSK6</i>     | -2.187±1.175 | -0.854±1.304 | 3.01E-08 |
| cg25221254 | 19 | 6333547   | <i>ACER1</i>     | 2.285±0.247  | 1.707±0.688  | 3.01E-08 |
| cg00891278 | 3  | 126113784 | <i>CCDC37</i>    | -3.087±0.414 | -2.41±0.769  | 3.01E-08 |
| cg23370883 | 7  | 44180604  | <i>MYL7</i>      | -0.24±0.285  | -0.783±0.633 | 3.02E-08 |
| cg06150803 | 13 | 24144257  | <i>TNFRSF19</i>  | -1.605±0.331 | -0.863±0.845 | 3.02E-08 |
| cg26783856 | 1  | 90287523  | <i>LRRC8D</i>    | -3.198±0.314 | -3.567±0.371 | 3.04E-08 |
| cg18408326 | 10 | 18429037  | <i>CACNB2</i>    | -3.271±0.35  | -2.608±0.773 | 3.05E-08 |
| cg24691453 | 1  | 153518384 | <i>S100A4</i>    | 0.13±0.221   | 0.749±0.744  | 3.05E-08 |
| cg15083227 | 15 | 65133289  | <i>PLEKHO2</i>   | -3.332±0.393 | -2.8±0.574   | 3.05E-08 |
| cg07264679 | 12 | 7657396   | <i>CD163</i>     | 1.742±0.301  | 1.101±0.757  | 3.06E-08 |
| cg13523557 | 7  | 45613725  | <i>ADCY1</i>     | -2.856±0.301 | -2.11±0.893  | 3.07E-08 |
| cg11630392 | 3  | 150920964 | <i>GPR171</i>    | 1.096±0.347  | 0.533±0.634  | 3.08E-08 |
| cg11880010 | 9  | 79328644  | <i>PRUNE2</i>    | -0.47±0.33   | 0.211±0.802  | 3.08E-08 |
| cg08331960 | 16 | 2076597   | <i>SLC9A3R2</i>  | -0.611±0.235 | -0.307±0.321 | 3.09E-08 |
| cg14383135 | 2  | 101436923 | <i>NPAS2</i>     | -4.245±0.889 | -3.058±1.275 | 3.12E-08 |
| cg25174591 | 17 | 11501557  | <i>DNAH9</i>     | -2.998±0.383 | -2.331±0.768 | 3.12E-08 |
| cg14360917 | 17 | 45992122  | <i>SP2</i>       | 0.173±0.218  | 0.559±0.446  | 3.12E-08 |
| cg20387706 | 2  | 102097314 | <i>0</i>         | 2.445±0.233  | 2.006±0.512  | 3.13E-08 |
| cg11762346 | 10 | 70980112  | <i>HKDC1</i>     | 0.754±0.241  | 0.059±0.839  | 3.13E-08 |
| cg11158430 | 3  | 191001413 | <i>UTS2B</i>     | 1.433±0.333  | 0.822±0.702  | 3.13E-08 |
| cg13488201 | 10 | 128077323 | <i>ADAM12</i>    | -1.604±0.375 | -0.851±0.884 | 3.15E-08 |
| cg14776962 | 6  | 26251899  | <i>HIST1H2BH</i> | -3.028±0.438 | -2.023±1.196 | 3.21E-08 |
| cg14521746 | 11 | 77185492  | <i>PAK1</i>      | -3.277±0.291 | -3.572±0.258 | 3.21E-08 |
| cg14892768 | 19 | 41725332  | <i>AXL</i>       | -2.379±0.46  | -1.761±0.664 | 3.22E-08 |

|            |    |           |               |              |              |          |
|------------|----|-----------|---------------|--------------|--------------|----------|
| cg26991199 | 1  | 24307153  | SRSF10        | -3.154±0.457 | -3.919±0.876 | 3.24E-08 |
| cg21457147 | 13 | 45768695  | KCTD4         | 1.713±0.301  | 2.082±0.378  | 3.25E-08 |
| cg15869642 | 16 | 49326109  | 0             | 2.939±0.326  | 2.203±0.875  | 3.26E-08 |
| cg26363196 | 1  | 76540236  | ST6GALNAC3    | -2.965±0.34  | -2.155±0.969 | 3.28E-08 |
| cg11521965 | 7  | 137028604 | PTN           | -2.518±0.27  | -1.852±0.798 | 3.28E-08 |
| cg08684473 | 19 | 54761090  | LILRB5        | 1.441±0.239  | 0.891±0.656  | 3.28E-08 |
| cg15242570 | 9  | 90341048  | CTSL          | -3.182±0.613 | -2.436±0.77  | 3.36E-08 |
| cg01144286 | 20 | 9495596   | LAMP5         | -3.94±0.348  | -3.161±0.929 | 3.37E-08 |
| cg21643045 | 2  | 228678693 | CCL20         | 3.362±0.315  | 2.764±0.699  | 3.38E-08 |
| cg03171924 | 1  | 25258332  | RUNX3         | 0.021±0.286  | 0.689±0.799  | 3.38E-08 |
| cg01194444 | 1  | 203054722 | MYOG          | 5.434±0.399  | 4.9±0.577    | 3.42E-08 |
| cg17803965 | 1  | 32281812  | SPOCD1        | -1.003±0.237 | -1.512±0.604 | 3.42E-08 |
| cg19884600 | 1  | 158901938 | PYHIN1        | 2.216±0.39   | 1.218±1.2    | 3.43E-08 |
| cg06738602 | 14 | 52780634  | PTGER2        | -3.221±0.538 | -2.379±0.953 | 3.44E-08 |
| cg13614181 | 13 | 42031103  | RGCC          | -2.914±0.297 | -2.205±0.85  | 3.44E-08 |
| cg08261094 | 7  | 37956276  | SFRP4         | -2.454±0.384 | -1.882±0.64  | 3.46E-08 |
| cg16776717 | 5  | 147163101 | JAKMIP2       | -0.942±0.238 | -0.382±0.671 | 3.47E-08 |
| cg27238470 | 1  | 41950325  | EDN2          | 0.332±0.215  | -0.15±0.574  | 3.48E-08 |
| cg10377274 | 11 | 125616888 | PATE1         | 2.18±0.252   | 1.383±0.969  | 3.48E-08 |
| cg15239123 | 14 | 70346413  | SMOC1         | -4.333±0.384 | -3.103±1.497 | 3.50E-08 |
| cg22930187 | 1  | 44398959  | ARTN          | -0.885±0.29  | -1.405±0.605 | 3.51E-08 |
| cg26628847 | 7  | 142829304 | PIP           | 0.261±0.194  | -0.475±0.9   | 3.53E-08 |
| cg03852570 | 10 | 100175106 | PYROXD2       | -2.419±0.4   | -1.796±0.705 | 3.53E-08 |
| cg12552392 | 20 | 34288511  | NFS1          | 1.301±0.284  | 0.822±0.551  | 3.60E-08 |
| cg24777950 | 14 | 25046121  | CTSG          | 1.434±0.294  | 1.834±0.436  | 3.60E-08 |
| cg11054936 | 13 | 20766170  | GJB2          | -0.892±0.244 | -1.338±0.521 | 3.61E-08 |
| cg19781133 | 7  | 150674980 | KCNH2         | -3.4±0.636   | -2.371±1.177 | 3.62E-08 |
| cg14348532 | 11 | 14993562  | CALCA         | -2.651±0.478 | -1.94±0.797  | 3.62E-08 |
| cg03055440 | 11 | 59950405  | MS4A6A        | 1.249±0.245  | 0.57±0.823   | 3.66E-08 |
| cg07080358 | 2  | 68546507  | CNRIP1        | -4.905±0.473 | -3.509±1.697 | 3.67E-08 |
| cg00746981 | 1  | 156721141 | HDGF          | -3.364±0.331 | -2.854±0.575 | 3.67E-08 |
| cg27447740 | 20 | 61148587  | C20orf166-AS1 | -4.153±0.424 | -3.481±0.765 | 3.67E-08 |
| cg19968631 | 4  | 175750792 | GLRA3         | -4.598±0.342 | -3.72±1.059  | 3.68E-08 |
| cg08999895 | 11 | 2925869   | SLC22A18AS    | 1.146±0.266  | 0.415±0.885  | 3.69E-08 |
| cg00174500 | 14 | 23846479  | CMTM5         | -0.182±0.259 | 0.494±0.816  | 3.69E-08 |
| cg11177693 | 2  | 27604063  | ZNF513        | -0.877±0.367 | -0.204±0.788 | 3.69E-08 |
| cg18740800 | 11 | 27914934  | 0             | 0.83±0.235   | 0.134±0.845  | 3.72E-08 |
| cg17398595 | 9  | 17578725  | SH3GL2        | -1.956±0.401 | -1.172±0.925 | 3.75E-08 |
| cg23704362 | 8  | 67405742  | C8orf46       | 1.462±0.294  | 1.932±0.537  | 3.75E-08 |
| cg04545516 | 20 | 43836061  | SEMG1         | 0.871±0.28   | 0.214±0.781  | 3.77E-08 |
| cg16984944 | 3  | 99979425  | TBC1D23       | -3.745±0.397 | -3.162±0.651 | 3.78E-08 |
| cg24302095 | 7  | 50861049  | GRB10         | -4.525±0.714 | -3.622±0.955 | 3.78E-08 |
| cg09018862 | 19 | 42882644  | MEGF8         | 2.177±0.243  | 1.697±0.566  | 3.78E-08 |
| cg15062535 | 19 | 52847933  | ZNF610        | 2.292±0.367  | 1.638±0.761  | 3.79E-08 |
| cg20286200 | 6  | 133562267 | EYA4          | -2.93±0.252  | -2.094±1.022 | 3.80E-08 |
| cg03856801 | 11 | 116709138 | APOA1         | 3.995±0.292  | 3.546±0.509  | 3.80E-08 |
| cg08432727 | 2  | 5831722   | SOX11         | -2.602±0.537 | -1.725±1.007 | 3.82E-08 |
| cg02273392 | 7  | 100770414 | SERPINE1      | -5.069±0.337 | -4.542±0.6   | 3.86E-08 |
| cg13351406 | 22 | 36031241  | 0             | 1.227±0.364  | 0.747±0.517  | 3.87E-08 |
| cg10338338 | 12 | 8088931   | SLC2A3        | -3.427±0.479 | -2.612±0.943 | 3.88E-08 |
| cg06722216 | 18 | 31803067  | NOL4          | -3.783±0.621 | -2.9±0.979   | 3.90E-08 |
| cg26624134 | 11 | 128761419 | KCNJ5         | -2.84±0.302  | -2.366±0.54  | 3.90E-08 |
| cg24512400 | 19 | 51522561  | KLK10         | -5.025±0.727 | -3.904±1.271 | 3.91E-08 |
| cg18971054 | 7  | 141695759 | MGAM          | 2.321±0.288  | 1.637±0.823  | 3.93E-08 |
| cg26647600 | 3  | 39369720  | CCR8          | 1.973±0.438  | 1.283±0.786  | 3.97E-08 |
| cg20668607 | 1  | 6762257   | DNAJC11       | 1.496±0.3    | 0.82±0.811   | 4.00E-08 |
| cg12163490 | 16 | 65155841  | CDH11         | -2.655±0.672 | -1.789±0.928 | 4.00E-08 |
| cg13492340 | 10 | 15762222  | ITGA8         | -3.613±0.29  | -2.758±1.043 | 4.01E-08 |
| cg19734228 | 9  | 90113593  | DAPK1         | -4.15±0.805  | -3.218±0.942 | 4.04E-08 |
| cg21115977 | 10 | 48416510  | GDF2          | 0.605±0.189  | 0.066±0.656  | 4.06E-08 |
| cg06541857 | 3  | 134203789 | CEP63         | -2.399±0.324 | -2.887±0.551 | 4.08E-08 |
| cg03533058 | 12 | 52437571  | NR4A1         | 1.048±0.252  | 1.473±0.492  | 4.08E-08 |
| cg14743462 | 1  | 228646946 | HIST3H2A      | -4.691±0.439 | -3.156±1.886 | 4.13E-08 |
| cg07623294 | 9  | 23826507  | ELAVL2        | -4.669±0.399 | -3.803±1.037 | 4.15E-08 |
| cg13906416 | 19 | 45147440  | PVR           | -4.048±0.41  | -3.414±0.721 | 4.15E-08 |
| cg00853068 | 17 | 43298592  | FMNL1         | -1.822±0.302 | -1.177±0.771 | 4.16E-08 |
| cg13156121 | 16 | 58010114  | TEPP          | 2.784±0.245  | 2.45±0.366   | 4.18E-08 |
| cg08151470 | 1  | 10092299  | UBE4B         | -0.138±0.439 | -0.701±0.603 | 4.19E-08 |
| cg16907566 | 8  | 121136534 | COL14A1       | -2.195±0.38  | -1.309±1.068 | 4.21E-08 |
| cg19463518 | 19 | 634035    | POLRMT        | -3.185±0.403 | -3.642±0.455 | 4.23E-08 |

|            |    |           |          |              |              |          |
|------------|----|-----------|----------|--------------|--------------|----------|
| cg22580173 | 15 | 39873304  | THBS1    | -4.807±0.461 | -4.253±0.574 | 4.24E-08 |
| cg11177404 | 19 | 49535079  | SNAR-G2  | -1.06±0.39   | -0.295±0.907 | 4.25E-08 |
| cg03375002 | 7  | 73623876  | LAT2     | 0.564±0.272  | 0.073±0.576  | 4.25E-08 |
| cg12781568 | 11 | 32452038  | WT1      | -0.283±0.36  | 0.354±0.743  | 4.26E-08 |
| cg08678755 | 6  | 131957011 | ENPP3    | 1.762±0.301  | 1.28±0.554   | 4.30E-08 |
| cg15888522 | 3  | 46068932  | XCR1     | 2.269±0.329  | 1.725±0.629  | 4.31E-08 |
| cg25066857 | 2  | 85921438  | GNLY     | 1.507±0.398  | 0.976±0.58   | 4.34E-08 |
| cg09425898 | 20 | 4721250   | PRNT     | 3.197±0.376  | 2.654±0.609  | 4.35E-08 |
| cg17897879 | 1  | 12123437  | TNFRSF8  | -4.253±0.48  | -3.081±1.42  | 4.36E-08 |
| cg06759890 | 5  | 77806538  | LHFPL2   | -0.814±0.278 | -0.425±0.431 | 4.36E-08 |
| cg06790324 | 7  | 50860564  | GRB10    | -4.055±0.733 | -3.122±0.999 | 4.41E-08 |
| cg03167883 | 8  | 49502967  | 0        | 1.155±0.253  | 0.417±0.903  | 4.42E-08 |
| cg01447817 | 2  | 241630251 | AQP12A   | 0.561±0.253  | -0.014±0.694 | 4.54E-08 |
| cg22487322 | 6  | 137366322 | IL20RA   | 2.765±0.457  | 1.544±1.489  | 4.58E-08 |
| cg20891301 | 4  | 4864711   | MSX1     | 0.804±0.181  | 1.18±0.451   | 4.60E-08 |
| cg17778120 | 3  | 139195319 | RBP2     | 2.743±0.308  | 2.038±0.852  | 4.60E-08 |
| cg21550442 | 19 | 36499839  | SYNE4    | 0.314±0.388  | -0.456±0.919 | 4.62E-08 |
| cg02995295 | 13 | 51796962  | FAM124A  | -4.44±0.371  | -3.807±0.738 | 4.62E-08 |
| cg01593190 | 5  | 178772793 | ADAMTS2  | -4.351±0.524 | -3.493±0.994 | 4.66E-08 |
| cg24030609 | 1  | 15802611  | CELA2B   | 0.504±0.283  | 0.922±0.472  | 4.67E-08 |
| cg15802898 | 9  | 100615201 | FOXE1    | -3.909±0.35  | -2.987±1.126 | 4.67E-08 |
| cg04008913 | 3  | 43327465  | SNRK     | -1.07±0.256  | -0.691±0.428 | 4.75E-08 |
| cg23196831 | 8  | 121137537 | COL14A1  | -3.257±0.522 | -2.291±1.143 | 4.78E-08 |
| cg10193817 | 11 | 115375226 | CADM1    | -3.821±0.649 | -2.962±0.938 | 4.81E-08 |
| cg26646411 | 22 | 19841374  | C22orf29 | -0.728±0.32  | -1.145±0.452 | 4.83E-08 |
| cg02347487 | 11 | 7059103   | NLRP14   | -0.763±0.238 | -1.374±0.746 | 4.84E-08 |
| cg05674036 | 17 | 3323791   | OR3A3    | 1.794±0.339  | 1.039±0.911  | 4.84E-08 |
| cg01982833 | 12 | 27174596  | MED21    | -1.026±0.323 | -1.48±0.502  | 4.85E-08 |
| cg08190291 | 21 | 28339442  | ADAMTS5  | -4.22±0.663  | -3.181±1.195 | 4.87E-08 |
| cg04438497 | 11 | 68519252  | MTL5     | -1.205±0.207 | -1.698±0.599 | 4.88E-08 |
| cg20269537 | 22 | 46067074  | ATXN10   | -1.937±0.23  | -1.446±0.592 | 4.95E-08 |
| cg01248426 | 8  | 87111155  | ATP6V0D2 | 0.672±0.307  | -0.061±0.892 | 4.95E-08 |
| cg24399405 | 16 | 189577    | NPRL3    | 3.228±0.265  | 2.393±1.029  | 4.96E-08 |
| cg10588377 | 10 | 124221799 | HTRA1    | -4.625±0.517 | -3.956±0.726 | 4.98E-08 |
| cg12485992 | 17 | 3374971   | SPATA22  | 3.455±0.262  | 2.88±0.695   | 4.99E-08 |
| cg15484384 | 3  | 134203672 | CEP63    | -0.068±0.23  | -0.387±0.355 | 5.00E-08 |
| cg22130834 | 1  | 55267046  | TTC22    | -4.487±0.597 | -5.074±0.512 | 5.00E-08 |
| cg10376763 | 2  | 217724363 | TNP1     | 3.165±0.188  | 2.683±0.589  | 5.03E-08 |
| cg20268522 | 11 | 112832152 | NCAM1    | -3.444±0.397 | -2.525±1.115 | 5.07E-08 |
| cg10125195 | 12 | 55028545  | LACRT    | 1.514±0.171  | 1.05±0.568   | 5.09E-08 |
| cg00550617 | 17 | 39405817  | KRTAP9-4 | -0.383±0.284 | 0.122±0.591  | 5.14E-08 |
| cg08251036 | 2  | 135008923 | 0        | 3.23±0.294   | 2.778±0.519  | 5.17E-08 |
| cg26632776 | 21 | 45875534  | LRRC3    | -4.229±0.409 | -3.459±0.917 | 5.19E-08 |
| cg10062065 | 2  | 220308747 | SPEG     | 2.167±0.406  | 2.659±0.52   | 5.21E-08 |
| cg02882813 | 20 | 23860078  | CST5     | 1.86±0.2     | 1.395±0.565  | 5.24E-08 |
| cg04335339 | 10 | 116853118 | ATRNL1   | -2.348±0.469 | -1.598±0.869 | 5.25E-08 |
| cg04402875 | 10 | 43572795  | RET      | -4.357±0.676 | -3.192±1.37  | 5.36E-08 |
| cg11378484 | 3  | 63848695  | THOC7    | -0.866±0.185 | -1.23±0.436  | 5.37E-08 |
| cg24530795 | 12 | 111807189 | FAM109A  | -4.069±0.488 | -3.439±0.685 | 5.39E-08 |
| cg24287460 | 3  | 128748026 | EFCC1    | 2.713±0.326  | 2.227±0.555  | 5.40E-08 |
| cg20179697 | 6  | 158243607 | SNX9     | -0.606±0.324 | 0.067±0.811  | 5.40E-08 |
| cg17791651 | 1  | 38513489  | POU3F1   | -1.561±0.422 | -0.864±0.814 | 5.45E-08 |
| cg09087901 | 6  | 161123803 | PLG      | 0.424±0.305  | -0.195±0.712 | 5.50E-08 |
| cg00240432 | 7  | 19157296  | TWIST1   | -4.759±0.454 | -3.568±1.462 | 5.50E-08 |
| cg10501629 | 12 | 90049560  | ATP2B1   | 2.108±0.27   | 2.439±0.351  | 5.50E-08 |
| cg06757810 | 8  | 87756528  | CNGB3    | 1.527±0.457  | 0.773±0.882  | 5.50E-08 |
| cg12582959 | 19 | 56159199  | CCDC106  | -1.557±0.437 | -0.881±0.779 | 5.53E-08 |
| cg19138960 | 20 | 23066947  | CD93     | 0.012±0.192  | 0.518±0.621  | 5.55E-08 |
| cg22908581 | 12 | 6898975   | CD4      | -1.328±0.285 | -1.856±0.629 | 5.58E-08 |
| cg12431401 | 19 | 39369277  | RINL     | -0.463±0.247 | 0.231±0.855  | 5.58E-08 |
| cg18056600 | 17 | 4642047   | CXCL16   | -3.12±0.333  | -3.645±0.608 | 5.62E-08 |
| cg00107488 | 22 | 19930437  | TXNRD2   | -0.926±0.276 | -1.29±0.401  | 5.65E-08 |
| cg09425611 | 16 | 55868370  | CES1     | -0.239±0.2   | -0.769±0.652 | 5.65E-08 |
| cg10301967 | 6  | 33240022  | RPS18    | -4.881±0.319 | -5.206±0.301 | 5.65E-08 |
| cg14963897 | 20 | 34288750  | NFS1     | 3.372±0.283  | 2.859±0.61   | 5.66E-08 |
| cg17709873 | 6  | 31540456  | LTA      | 1.354±0.426  | 0.727±0.716  | 5.70E-08 |
| cg06917325 | 11 | 62783123  | SLC22A8  | 1.568±0.329  | 0.885±0.825  | 5.74E-08 |
| cg11021744 | 3  | 11034279  | SLC6A1   | -3.942±0.502 | -3.288±0.717 | 5.81E-08 |
| cg11171719 | 3  | 37903684  | CTDSPL   | -4.249±1.065 | -3.052±1.21  | 5.87E-08 |
| cg02131967 | 17 | 61554106  | ACE      | -5.48±0.597  | -4.152±1.617 | 5.89E-08 |

|            |    |           |                 |              |              |          |
|------------|----|-----------|-----------------|--------------|--------------|----------|
| cg11286122 | 11 | 118477406 | <i>PHLDB1</i>   | 1.373±0.3    | 1.721±0.36   | 5.92E-08 |
| cg27504991 | 6  | 43022209  | <i>CUL7</i>     | 1.449±0.374  | 2.31±1.051   | 5.95E-08 |
| cg19237753 | 20 | 1876215   | <i>SIRPA</i>    | -3.882±0.329 | -2.976±1.119 | 5.97E-08 |
| cg07576541 | 1  | 153630883 | <i>SNAPIN</i>   | 2.007±0.338  | 1.331±0.816  | 5.99E-08 |
| cg06855803 | 19 | 10450364  | <i>ICAM3</i>    | -0.719±0.202 | -0.203±0.634 | 6.06E-08 |
| cg27440834 | 3  | 125239841 | <i>SNX4</i>     | 1.683±0.255  | 1.051±0.776  | 6.13E-08 |
| cg14127659 | 22 | 38350784  | <i>C22orf23</i> | 0.482±0.144  | 0.921±0.544  | 6.20E-08 |
| cg06572160 | 19 | 50831901  | <i>KCNC3</i>    | -3.175±0.579 | -2.043±1.363 | 6.20E-08 |
| cg16377872 | 19 | 15084823  | <i>SLC1A6</i>   | 1.855±0.317  | 1.165±0.84   | 6.20E-08 |
| cg10525372 | 6  | 112375333 | <i>WISP3</i>    | 1.745±0.218  | 1.237±0.622  | 6.25E-08 |
| cg07864632 | 2  | 230785697 | <i>TRIP12</i>   | -5.038±0.438 | -4.081±1.166 | 6.29E-08 |
| cg13550608 | 3  | 50314654  | <i>0</i>        | 3.237±0.44   | 2.744±0.5    | 6.29E-08 |
| cg02503850 | 10 | 72432552  | <i>ADAMTS14</i> | -3.286±0.698 | -2.449±0.885 | 6.30E-08 |
| cg19742789 | 5  | 159739256 | <i>CCNJL</i>    | -4.297±0.447 | -3.72±0.633  | 6.35E-08 |
| cg12686016 | 7  | 27135477  | <i>HoxA1</i>    | -4.242±0.433 | -3.092±1.422 | 6.41E-08 |
| cg21522988 | 12 | 29376872  | <i>FAR2</i>     | 1.063±0.261  | 0.335±0.901  | 6.41E-08 |
| cg14592065 | 17 | 38209993  | <i>MED24</i>    | 0.235±0.248  | 0.738±0.609  | 6.42E-08 |
| cg17833578 | 10 | 86001560  | <i>LRIT1</i>    | -0.147±0.281 | -0.817±0.823 | 6.42E-08 |
| cg26393983 | 18 | 2571747   | <i>NDC80</i>    | -4.725±0.29  | -5.025±0.283 | 6.45E-08 |
| cg00347904 | 6  | 35182508  | <i>SCUBE3</i>   | -3.263±0.541 | -2.38±1.037  | 6.46E-08 |
| cg08475827 | 2  | 152266230 | <i>RIF1</i>     | -2.281±0.338 | -2.749±0.527 | 6.48E-08 |
| cg23902550 | 8  | 144681106 | <i>TIGD5</i>    | 0.421±0.181  | 0.846±0.521  | 6.48E-08 |
| cg18016365 | 4  | 47033634  | <i>GABRB1</i>   | -3.595±0.354 | -2.741±1.049 | 6.53E-08 |
| cg05932408 | 20 | 48184639  | <i>PTGIS</i>    | -3.645±0.421 | -2.944±0.826 | 6.54E-08 |
| cg22395019 | 2  | 31361692  | <i>GALNT14</i>  | -2.93±0.303  | -3.488±0.669 | 6.54E-08 |
| cg16898420 | 9  | 103791078 | <i>LPPR1</i>    | -3.368±0.452 | -2.659±0.826 | 6.62E-08 |
| cg03600318 | 10 | 81708991  | <i>SFTPD</i>    | -0.553±0.29  | -1.084±0.636 | 6.62E-08 |
| cg27316956 | 6  | 152958899 | <i>SYNE1</i>    | -0.44±0.386  | -0.948±0.563 | 6.62E-08 |
| cg16297030 | 5  | 35047946  | <i>AGXT2</i>    | 1.354±0.2    | 0.753±0.749  | 6.66E-08 |
| cg02305723 | 15 | 25093456  | <i>SNRPN</i>    | 0.312±0.411  | 0.952±0.745  | 6.67E-08 |
| cg20707333 | 20 | 58514079  | <i>PPP1R3D</i>  | 4.587±0.303  | 3.555±1.291  | 6.73E-08 |
| cg25192419 | 8  | 25042348  | <i>DOCK5</i>    | -5.698±0.715 | -4.748±1.057 | 6.74E-08 |
| cg12232274 | 6  | 150185854 | <i>LRP11</i>    | -2.849±0.293 | -3.375±0.629 | 6.79E-08 |
| cg26309134 | 19 | 56879571  | <i>ZNF542</i>   | -4.736±0.563 | -3.197±1.91  | 6.85E-08 |
| cg15425280 | 4  | 158141492 | <i>GRIA2</i>    | -2.831±0.289 | -2.117±0.881 | 6.86E-08 |
| cg23850212 | 19 | 57049857  | <i>ZFP28</i>    | -4.097±0.743 | -3.042±1.2   | 6.86E-08 |
| cg09296212 | 9  | 130828969 | <i>NAIF1</i>    | 2.251±0.226  | 1.689±0.695  | 6.95E-08 |
| cg13580728 | 9  | 95168155  | <i>OGN</i>      | 1.582±0.278  | 1.913±0.344  | 6.95E-08 |
| cg25117362 | 10 | 104221598 | <i>TMEM180</i>  | -2.368±0.298 | -2.71±0.355  | 6.96E-08 |
| cg03158400 | 21 | 42688886  | <i>FAM3B</i>    | -4.294±0.557 | -3.412±1.033 | 6.96E-08 |
| cg26683005 | 19 | 48752990  | <i>CARD8</i>    | -0.495±0.295 | 0.173±0.82   | 7.07E-08 |
| cg16627949 | 14 | 21526351  | <i>RNASE8</i>   | 0.977±0.444  | 0.266±0.835  | 7.09E-08 |
| cg16703647 | 15 | 78632592  | <i>CRABP1</i>   | -4.245±0.421 | -3.415±1.006 | 7.11E-08 |
| cg13921352 | 3  | 68981890  | <i>FAM19A4</i>  | -3.847±0.501 | -2.745±1.35  | 7.13E-08 |
| cg19286604 | 11 | 125365138 | <i>FEZ1</i>     | -3.124±0.453 | -2.32±0.963  | 7.19E-08 |
| cg12870705 | 10 | 33624623  | <i>NRP1</i>     | -4.371±0.804 | -3.39±1.054  | 7.26E-08 |
| cg05288803 | 22 | 33198055  | <i>TIMP3</i>    | -5.487±0.808 | -4.497±1.066 | 7.28E-08 |
| cg01714932 | 12 | 9360854   | <i>PZP</i>      | 1.992±0.325  | 1.351±0.778  | 7.30E-08 |
| cg18440048 | 22 | 24093826  | <i>ZNF70</i>    | -2.39±0.362  | -2.93±0.625  | 7.37E-08 |
| cg22007439 | 9  | 22446972  | <i>DMRTA1</i>   | -5.837±0.562 | -5.161±0.721 | 7.38E-08 |
| cg10951619 | 1  | 190447232 | <i>FAM5C</i>    | -2.766±0.362 | -2.165±0.712 | 7.43E-08 |
| cg17550582 | 20 | 45338652  | <i>SLC2A10</i>  | -5.065±0.473 | -4.286±0.922 | 7.45E-08 |
| cg01661993 | 19 | 54926966  | <i>TTYH1</i>    | -3.196±0.426 | -2.519±0.797 | 7.71E-08 |
| cg11879188 | 9  | 136149908 | <i>ABO</i>      | 1.507±0.295  | 0.899±0.743  | 7.73E-08 |
| cg11377136 | 22 | 46658960  | <i>PKDREJ</i>   | -1.195±0.6   | -0.384±0.913 | 7.77E-08 |
| cg26711820 | 12 | 81101689  | <i>MYF6</i>     | 0.381±0.332  | -0.306±0.841 | 7.78E-08 |
| cg19205533 | 12 | 15373987  | <i>RERG</i>     | -0.205±0.169 | -0.694±0.612 | 7.80E-08 |
| cg05996042 | 6  | 45295718  | <i>RUNX2</i>    | 0.156±0.222  | -0.507±0.824 | 7.84E-08 |
| cg00491404 | 1  | 110306591 | <i>EPS8L3</i>   | 2.067±0.264  | 1.618±0.535  | 7.86E-08 |
| cg09837361 | 1  | 28996131  | <i>GMEB1</i>    | -3.797±0.238 | -3.141±0.819 | 7.88E-08 |
| cg17532978 | 12 | 55413394  | <i>NEUROD4</i>  | -3.521±0.49  | -2.812±0.816 | 7.90E-08 |
| cg09626984 | 8  | 11566096  | <i>GATA4</i>    | -0.803±0.708 | -0.075±0.694 | 7.92E-08 |
| cg12970081 | 19 | 51273924  | <i>GPR32</i>    | 1.287±0.332  | 0.507±0.966  | 7.99E-08 |
| cg15034135 | 5  | 128796168 | <i>ADAMTS19</i> | -5.388±0.506 | -4.369±1.245 | 8.07E-08 |
| cg17631429 | 20 | 30433233  | <i>FOXS1</i>    | 2.46±0.238   | 3.069±0.757  | 8.09E-08 |
| cg26853855 | 2  | 166428866 | <i>CSRNP3</i>   | 0.401±0.25   | 0.879±0.581  | 8.15E-08 |
| cg07935264 | 2  | 113594375 | <i>IL1B</i>     | -0.844±0.276 | -1.411±0.694 | 8.16E-08 |
| cg18474934 | 4  | 122853965 | <i>TRPC3</i>    | 1.175±0.4    | 1.725±0.625  | 8.20E-08 |
| cg22036988 | 3  | 140770345 | <i>SPSB4</i>    | -4.453±0.562 | -3.116±1.658 | 8.22E-08 |
| cg04434339 | 2  | 107503547 | <i>ST6GAL2</i>  | -3.967±0.81  | -2.845±1.278 | 8.23E-08 |

|            |    |           |                  |              |              |          |
|------------|----|-----------|------------------|--------------|--------------|----------|
| cg25228126 | 17 | 42635310  | <i>FZD2</i>      | -3.407±0.481 | -2.301±1.369 | 8.23E-08 |
| cg18433086 | 1  | 179199613 | <i>ABL2</i>      | -0.329±0.287 | 0.149±0.564  | 8.29E-08 |
| cg24818418 | 4  | 110834590 | <i>EGF</i>       | 1.193±0.214  | 0.538±0.823  | 8.30E-08 |
| cg04267184 | 20 | 3023418   | <i>GNRH2</i>     | 1.167±0.232  | 1.637±0.574  | 8.30E-08 |
| cg22511262 | 11 | 32455192  | <i>WT1</i>       | -3.385±0.363 | -2.825±0.657 | 8.31E-08 |
| cg13424446 | 20 | 23969432  | <i>GGTLC1</i>    | 1.544±0.307  | 1.114±0.491  | 8.33E-08 |
| cg16545105 | 5  | 76248749  | <i>CRHBP</i>     | 0.991±0.299  | 1.567±0.7    | 8.34E-08 |
| cg04569233 | 3  | 39321449  | <i>CX3CR1</i>    | 0.567±0.23   | 0.204±0.428  | 8.35E-08 |
| cg27286999 | 9  | 137967306 | <i>OLFM1</i>     | -3.835±0.499 | -3.166±0.754 | 8.39E-08 |
| cg22421766 | 1  | 1217658   | <i>SCNN1D</i>    | -1.639±0.291 | -2.058±0.485 | 8.45E-08 |
| cg10922280 | 16 | 68034227  | <i>DPEP2</i>     | -0.746±0.197 | -0.33±0.512  | 8.45E-08 |
| cg12718440 | 10 | 99393576  | <i>MORN4</i>     | -1.157±0.236 | -1.624±0.57  | 8.45E-08 |
| cg17754680 | 7  | 44581831  | <i>NPC1L1</i>    | 1.321±0.28   | 1.815±0.595  | 8.48E-08 |
| cg11529128 | 6  | 35772890  | <i>LHFPL5</i>    | -4.452±0.352 | -3.711±0.912 | 8.52E-08 |
| cg08268099 | 9  | 137966584 | <i>OLFM1</i>     | 2.387±0.325  | 1.558±1.035  | 8.52E-08 |
| cg23760945 | 19 | 11665140  | <i>ELOF1</i>     | 1.688±0.378  | 1.058±0.75   | 8.55E-08 |
| cg16069910 | 19 | 17571528  | <i>NXNL1</i>     | 1.155±0.296  | 0.663±0.588  | 8.64E-08 |
| cg13301933 | 15 | 61521439  | <i>RORA</i>      | -4.675±0.433 | -3.987±0.815 | 8.66E-08 |
| cg05722918 | 12 | 101603929 | <i>SLC5A8</i>    | -4.382±0.521 | -3.506±1.049 | 8.70E-08 |
| cg21988041 | 12 | 104444060 | <i>GLT8D2</i>    | -4.463±0.369 | -3.569±1.113 | 8.72E-08 |
| cg00443307 | 12 | 9141740   | <i>KLRG1</i>     | 0.665±0.321  | 0.074±0.709  | 8.72E-08 |
| cg08578023 | 1  | 150738173 | <i>CTSS</i>      | -1.952±0.547 | -2.6±0.655   | 8.76E-08 |
| cg09172980 | 2  | 73870174  | <i>NAT8</i>      | -1.58±0.284  | -0.964±0.76  | 8.76E-08 |
| cg00465284 | 2  | 80531898  | <i>LRRTM1</i>    | -4.036±0.466 | -3.243±0.951 | 8.78E-08 |
| cg23815000 | 9  | 138413012 | <i>LCN1</i>      | 1.568±0.298  | 0.901±0.827  | 8.84E-08 |
| cg22298208 | 7  | 142635611 | <i>C7orf34</i>   | 3.279±0.173  | 2.702±0.728  | 8.87E-08 |
| cg09839960 | 15 | 25523494  | <i>SNORD109B</i> | 3.113±0.281  | 2.425±0.858  | 8.94E-08 |
| cg11618577 | 2  | 27665543  | <i>KRTCAP3</i>   | 0.584±0.198  | 0.22±0.442   | 8.97E-08 |
| cg17489451 | 12 | 28410104  | <i>CCDC91</i>    | 0.969±0.269  | 0.413±0.678  | 9.03E-08 |
| cg04391111 | 1  | 3568004   | <i>TP73</i>      | -3.471±0.671 | -2.369±1.315 | 9.07E-08 |
| cg10694152 | 13 | 99404506  | <i>SLC15A1</i>   | -2.289±0.486 | -1.611±0.779 | 9.12E-08 |
| cg16474684 | 4  | 2470049   | <i>RNF4</i>      | -3.512±0.429 | -3.988±0.49  | 9.12E-08 |
| cg17133183 | 15 | 78632861  | <i>CRABP1</i>    | -5.206±0.633 | -4.143±1.273 | 9.12E-08 |
| cg07309102 | 9  | 110251826 | <i>KLF4</i>      | -4.964±0.662 | -4.068±1.017 | 9.13E-08 |
| cg01313514 | 1  | 228194916 | <i>WNT3A</i>     | -3.604±0.511 | -2.813±0.933 | 9.13E-08 |
| cg17836145 | 6  | 133084642 | <i>VNN2</i>      | -1.285±0.296 | -0.491±0.997 | 9.16E-08 |
| cg09081544 | 3  | 124652790 | <i>MUC13</i>     | 1.969±0.283  | 1.3±0.832    | 9.16E-08 |
| cg12259537 | 19 | 58514694  | <i>ZNF606</i>    | -2.656±0.418 | -1.82±1.026  | 9.19E-08 |
| cg20022541 | 14 | 94385395  | <i>FAM181A</i>   | 2.658±0.42   | 1.829±1.017  | 9.23E-08 |
| cg00325491 | 11 | 93286170  | <i>0</i>         | 1.46±0.334   | 0.88±0.7     | 9.24E-08 |
| cg11846236 | 3  | 48632568  | <i>COL7A1</i>    | -2.789±0.578 | -1.863±1.102 | 9.37E-08 |
| cg00615377 | 22 | 36236649  | <i>RFXOX2</i>    | -3.256±0.479 | -2.608±0.737 | 9.37E-08 |
| cg10726357 | 9  | 115653543 | <i>SLC46A2</i>   | 0.424±0.245  | 0.798±0.44   | 9.42E-08 |
| cg27383362 | 1  | 1385371   | <i>ATAD3C</i>    | 2.015±0.356  | 2.436±0.452  | 9.45E-08 |
| cg22224704 | 11 | 67352041  | <i>GSTP1</i>     | -1.783±0.479 | -1.19±0.653  | 9.48E-08 |
| cg17884373 | 14 | 60711697  | <i>PPM1A</i>     | 2.043±0.204  | 1.415±0.793  | 9.50E-08 |
| cg11784785 | 11 | 20620089  | <i>SLC6A5</i>    | -3.394±0.407 | -2.796±0.697 | 9.51E-08 |
| cg05064352 | 22 | 45406545  | <i>PHF21B</i>    | -3.843±0.483 | -3.036±0.968 | 9.57E-08 |
| cg04037228 | 3  | 45636386  | <i>LIMD1</i>     | -0.468±0.409 | -0.97±0.551  | 9.58E-08 |
| cg02507952 | 14 | 106390641 | <i>KIAA0125</i>  | 0.181±0.195  | -0.411±0.749 | 9.76E-08 |
| cg20979799 | 6  | 117198560 | <i>RFX6</i>      | -2.261±0.363 | -1.539±0.888 | 9.82E-08 |
| cg03440267 | 6  | 6321061   | <i>F13A1</i>     | -2.373±0.269 | -2.919±0.674 | 9.85E-08 |
| cg17321617 | 11 | 64764490  | <i>BATF2</i>     | -2.496±0.316 | -2.038±0.534 | 9.85E-08 |
| cg19912436 | 19 | 708918    | <i>PALM</i>      | -4.03±1.271  | -2.704±1.308 | 9.97E-08 |
| cg20615832 | 4  | 74719172  | <i>PF4V1</i>     | -0.691±0.313 | -0.119±0.696 | 9.98E-08 |
| cg13003163 | 12 | 48866481  | <i>ANP32D</i>    | 2.304±0.275  | 1.834±0.567  | 1.00E-07 |
| cg03294557 | 18 | 61312477  | <i>SERPINB4</i>  | -0.398±0.304 | -0.805±0.463 | 1.00E-07 |
| cg25623640 | 4  | 71532172  | <i>IGJ</i>       | 0.451±0.201  | 0.006±0.549  | 1.01E-07 |
| cg24070292 | 9  | 35689808  | <i>TPM2</i>      | -0.98±0.252  | -0.63±0.404  | 1.01E-07 |
| cg01762581 | 8  | 42234614  | <i>DKK4</i>      | 0.444±0.216  | 0.839±0.482  | 1.01E-07 |
| cg16959606 | 1  | 169074934 | <i>ATP1B1</i>    | -4.384±0.296 | -4.675±0.268 | 1.01E-07 |
| cg20588045 | 10 | 56561096  | <i>PCDH15</i>    | -1.986±0.288 | -1.325±0.825 | 1.02E-07 |
| cg14787704 | 5  | 65449380  | <i>SREK1</i>     | -0.633±0.363 | -0.031±0.722 | 1.02E-07 |
| cg13140267 | 2  | 96971704  | <i>SNRNP200</i>  | -3.294±0.462 | -3.966±0.785 | 1.03E-07 |
| cg01643624 | 11 | 8954893   | <i>C11orf16</i>  | 1.537±0.173  | 1.051±0.615  | 1.04E-07 |
| cg23214764 | 11 | 86511210  | <i>PRSS23</i>    | -3.394±0.502 | -2.766±0.696 | 1.04E-07 |
| cg19903229 | 14 | 57960650  | <i>C14orf105</i> | -0.625±0.458 | -1.111±0.487 | 1.04E-07 |
| cg06142324 | 11 | 124805538 | <i>HEPACAM</i>   | 2.632±0.333  | 1.783±1.068  | 1.04E-07 |
| cg22063989 | 1  | 38100795  | <i>RSPO1</i>     | -4.628±0.538 | -3.811±0.965 | 1.04E-07 |
| cg17469978 | 7  | 116164704 | <i>CAV1</i>      | -4.815±0.36  | -4.223±0.711 | 1.04E-07 |

|            |    |           |                     |              |              |          |
|------------|----|-----------|---------------------|--------------|--------------|----------|
| cg09156233 | 4  | 95679705  | <i>BMPR1B</i>       | -3.416±0.967 | -2.288±1.209 | 1.05E-07 |
| cg15610233 | 8  | 24297874  | <i>ADAM7</i>        | 1.394±0.266  | 0.871±0.646  | 1.05E-07 |
| cg22182975 | 6  | 167571172 | <i>GPR31</i>        | 3.013±0.32   | 2.512±0.596  | 1.05E-07 |
| cg21399079 | 2  | 105858139 | <i>GPR45</i>        | 3.593±0.276  | 3.008±0.726  | 1.05E-07 |
| cg19332710 | 20 | 43438865  | <i>RIMS4</i>        | -5.373±1.01  | -3.793±1.88  | 1.06E-07 |
| cg15746445 | 2  | 234824933 | <i>TRPM8</i>        | 0.457±0.262  | -0.18±0.8    | 1.07E-07 |
| cg19721889 | 5  | 153857789 | <i>HAND1</i>        | -3.306±0.495 | -2.406±1.099 | 1.09E-07 |
| cg16632715 | 2  | 176972113 | <i>HOXD11</i>       | -2.232±0.476 | -1.502±0.866 | 1.09E-07 |
| cg11277126 | 20 | 33680945  | <i>TRPC4AP</i>      | -2.485±0.245 | -3.029±0.68  | 1.09E-07 |
| cg21652958 | 6  | 169653961 | <i>THBS2</i>        | -3.726±0.397 | -3.025±0.854 | 1.10E-07 |
| cg02449608 | 19 | 58486600  | <i>C19orf18</i>     | 2.639±0.379  | 2.09±0.642   | 1.10E-07 |
| cg10671066 | 1  | 160492861 | <i>SLAMF6</i>       | -2.46±0.427  | -3.028±0.646 | 1.11E-07 |
| cg10222534 | 19 | 48958894  | <i>KCNJ14</i>       | 1.884±0.242  | 2.223±0.393  | 1.11E-07 |
| cg14386691 | 14 | 23479657  | <i>C14orf93</i>     | -2.85±0.311  | -3.241±0.435 | 1.11E-07 |
| cg18011401 | 19 | 13617366  | <i>CACNA1A</i>      | -3.868±0.487 | -2.868±1.241 | 1.12E-07 |
| cg03775123 | 15 | 65214075  | <i>ANKDD1A</i>      | -0.016±0.238 | -0.54±0.655  | 1.13E-07 |
| cg17191178 | 3  | 157824217 | <i>SHOX2</i>        | -3.288±0.572 | -2.082±1.503 | 1.14E-07 |
| cg13191808 | 1  | 55505327  | <i>PCSK9</i>        | -4.576±0.59  | -3.872±0.767 | 1.14E-07 |
| cg16570917 | 1  | 43996062  | <i>PTPRF</i>        | 2.332±0.139  | 2.058±0.339  | 1.14E-07 |
| cg00027083 | 18 | 5543801   | <i>EPB41L3</i>      | -1.597±0.727 | -0.698±0.998 | 1.14E-07 |
| cg05483509 | 16 | 2563435   | <i>ATP6V0C</i>      | -3.018±0.305 | -2.075±1.201 | 1.14E-07 |
| cg19731268 | 10 | 73724697  | <i>CHST3</i>        | -3.873±0.451 | -3.177±0.828 | 1.14E-07 |
| cg17177699 | 19 | 10120594  | <i>COL5A3</i>       | -1.076±0.24  | -0.678±0.481 | 1.14E-07 |
| cg15144793 | 2  | 235861303 | <i>SH3BP4</i>       | -5.418±0.614 | -4.74±0.706  | 1.14E-07 |
| cg02115041 | 8  | 53852101  | <i>NPBWR1</i>       | -3.359±0.495 | -2.65±0.829  | 1.15E-07 |
| cg22026853 | 6  | 99282887  | <i>POU3F2</i>       | -4.658±0.905 | -3.459±1.367 | 1.15E-07 |
| cg06589885 | 1  | 145413193 | <i>HFE2</i>         | 0.433±0.246  | 1.028±0.749  | 1.15E-07 |
| cg10500283 | 1  | 7913081   | <i>UTS2</i>         | 0.883±0.361  | 1.42±0.634   | 1.15E-07 |
| cg17769238 | 11 | 2019568   | <i>H19</i>          | 0.641±0.117  | 0.305±0.427  | 1.16E-07 |
| cg03283842 | 2  | 179343803 | <i>FKBP7</i>        | -3.948±0.467 | -4.461±0.531 | 1.16E-07 |
| cg02788102 | 11 | 115374969 | <i>CADM1</i>        | -3.623±0.459 | -3.07±0.608  | 1.16E-07 |
| cg13697387 | 1  | 152670843 | <i>LCE2A</i>        | -2.535±0.328 | -3.02±0.573  | 1.17E-07 |
| cg15301694 | 14 | 31496854  | <i>AP4S1</i>        | 1.535±0.335  | 0.851±0.851  | 1.19E-07 |
| cg05958582 | 10 | 102090366 | <i>PKD2L1</i>       | 0.504±0.198  | 0.883±0.469  | 1.19E-07 |
| cg25014318 | 6  | 39016776  | <i>GLP1R</i>        | -3.031±0.438 | -2.076±1.196 | 1.21E-07 |
| cg08349806 | 16 | 15489904  | <i>MPV17L</i>       | -2.017±0.614 | -1.177±0.972 | 1.22E-07 |
| cg17687962 | 19 | 51358244  | <i>KLK3</i>         | 0.611±0.219  | 0.141±0.589  | 1.22E-07 |
| cg15227610 | 11 | 111782016 | <i>CRYAB</i>        | 0.525±0.222  | 0.918±0.48   | 1.23E-07 |
| cg22686523 | 17 | 26940926  | <i>SGK494</i>       | 1.297±0.488  | 1.791±0.477  | 1.24E-07 |
| cg06933965 | 12 | 108732994 | <i>CMKLR1</i>       | -2.583±0.407 | -1.774±1.005 | 1.25E-07 |
| cg17676574 | 3  | 126237373 | <i>UROC1</i>        | 1.057±0.181  | 0.683±0.467  | 1.27E-07 |
| cg03860768 | 8  | 11351571  | <i>BLK</i>          | 1.948±0.27   | 1.423±0.652  | 1.27E-07 |
| cg22090592 | 14 | 105174642 | <i>INF2</i>         | 0.597±0.185  | 0.128±0.595  | 1.28E-07 |
| cg07830847 | 1  | 111061374 | <i>KCNA10</i>       | 2.779±0.224  | 2.346±0.537  | 1.28E-07 |
| cg07237939 | 6  | 160769754 | <i>SLC22A3</i>      | -3.77±0.902  | -2.694±1.18  | 1.28E-07 |
| cg04576021 | 6  | 32784255  | <i>HLA-DOB</i>      | 2.228±0.35   | 1.62±0.744   | 1.29E-07 |
| cg04637372 | 1  | 20617456  | <i>VWA5B1</i>       | 0.418±0.259  | 1.133±0.912  | 1.29E-07 |
| cg07924575 | 22 | 26881231  | <i>SRRD</i>         | -0.428±0.245 | 0.117±0.686  | 1.29E-07 |
| cg25823578 | 14 | 52781312  | <i>PTGER2</i>       | -4.502±0.376 | -3.574±1.175 | 1.29E-07 |
| cg09186006 | 10 | 91295299  | <i>SLC16A12</i>     | -3.759±0.704 | -2.702±1.259 | 1.30E-07 |
| cg17939444 | 8  | 40010443  | <i>C8orf4</i>       | -0.756±0.394 | -0.138±0.741 | 1.30E-07 |
| cg12164282 | 2  | 1748112   | <i>PXDN</i>         | -1.662±0.896 | -0.772±0.85  | 1.31E-07 |
| cg18368125 | 16 | 69385827  | <i>TMED6</i>        | 1.622±0.259  | 0.905±0.914  | 1.33E-07 |
| cg00136477 | 1  | 22970339  | <i>C1QC</i>         | 1.086±0.252  | 0.682±0.488  | 1.33E-07 |
| cg01655355 | 19 | 17982748  | <i>SLC5A5</i>       | -4.154±0.521 | -3.588±0.588 | 1.36E-07 |
| cg19304352 | 8  | 6796176   | <i>DEFA4</i>        | 2.397±0.204  | 1.993±0.504  | 1.36E-07 |
| cg20776317 | 9  | 139292793 | <i>SNAPC4</i>       | 2.575±0.366  | 2.956±0.383  | 1.36E-07 |
| cg00804392 | 4  | 40198595  | <i>RHOH</i>         | -0.968±0.294 | -0.296±0.848 | 1.37E-07 |
| cg03533858 | 1  | 2324396   | <i>RER1</i>         | 1.419±0.26   | 1.891±0.582  | 1.37E-07 |
| cg16762386 | 1  | 27240514  | <i>NR0B2</i>        | 0.351±0.247  | -0.195±0.689 | 1.39E-07 |
| cg01316819 | 12 | 54982281  | <i>PPP1R1A</i>      | -3.714±0.591 | -2.944±0.883 | 1.40E-07 |
| cg05887405 | 16 | 83982436  | <i>0</i>            | 1.085±0.253  | 0.476±0.773  | 1.40E-07 |
| cg03924115 | 9  | 133768966 | <i>QRFP</i>         | 0.763±0.229  | 1.119±0.428  | 1.41E-07 |
| cg03478689 | 5  | 83680717  | <i>EDIL3</i>        | -4.079±0.488 | -3.23±1.043  | 1.41E-07 |
| cg21505334 | 19 | 42213020  | <i>CEACAM5</i>      | 2.373±0.203  | 1.612±0.983  | 1.41E-07 |
| cg26059153 | 20 | 13976190  | <i>MACROD2</i>      | -3.873±0.746 | -2.865±1.172 | 1.42E-07 |
| cg02358804 | 19 | 36719212  | <i>ZNFX146</i>      | 1.844±0.361  | 2.374±0.629  | 1.42E-07 |
| cg12884406 | 1  | 103573989 | <i>COL11A1</i>      | -2.162±0.306 | -1.694±0.562 | 1.42E-07 |
| cg04561804 | 3  | 169683976 | <i>LOC100128164</i> | -0.71±0.327  | 0.014±0.913  | 1.43E-07 |
| cg25989745 | 9  | 12693326  | <i>TYRP1</i>        | 1.62±0.394   | 1.111±0.582  | 1.43E-07 |

|            |    |           |               |              |              |          |
|------------|----|-----------|---------------|--------------|--------------|----------|
| cg05714479 | 13 | 21634945  | LATS2         | -5.363±0.683 | -4.4±1.133   | 1.43E-07 |
| cg17918700 | 11 | 65363503  | KCNK7         | 1.698±0.208  | 1.171±0.671  | 1.43E-07 |
| cg20006825 | 12 | 6874964   | PTMS          | -3.213±0.414 | -2.672±0.62  | 1.44E-07 |
| cg06117855 | 3  | 45067788  | CLEC3B        | -3.599±0.466 | -3.066±0.574 | 1.44E-07 |
| cg25211252 | 3  | 178984797 | KCNMB3        | 1.064±0.204  | 1.55±0.617   | 1.44E-07 |
| cg26952188 | 11 | 76840241  | MYO7A         | 2.674±0.198  | 2.429±0.276  | 1.44E-07 |
| cg10516886 | 1  | 111415232 | CD53          | 0.102±0.26   | -0.509±0.775 | 1.44E-07 |
| cg14792155 | 15 | 42289618  | PLA2G4E       | 3.198±0.519  | 2.443±0.896  | 1.44E-07 |
| cg19236727 | 5  | 178287717 | ZNF354B       | 0.161±0.135  | 0.303±0.145  | 1.44E-07 |
| cg24646414 | 8  | 11565725  | GATA4         | -0.537±0.484 | 0.117±0.761  | 1.47E-07 |
| cg00685836 | 12 | 82153256  | PPFIA2        | -4.57±0.497  | -3.759±0.987 | 1.48E-07 |
| cg23843812 | 8  | 38385977  | C8orf86       | -3.564±0.4   | -3.079±0.541 | 1.48E-07 |
| cg25372195 | 12 | 55042293  | DCD           | 0.816±0.225  | 0.27±0.694   | 1.48E-07 |
| cg07549715 | 20 | 3024204   | GNRH2         | 0.503±0.233  | 0.873±0.448  | 1.49E-07 |
| cg02245418 | 1  | 145609675 | POLR3C        | 2.315±0.376  | 2.733±0.441  | 1.49E-07 |
| cg22748573 | 1  | 41327924  | CITED4        | -4.57±0.407  | -3.999±0.672 | 1.49E-07 |
| cg24956866 | 7  | 134464129 | CALD1         | -2.305±0.467 | -1.553±0.914 | 1.49E-07 |
| cg26128441 | 11 | 57105339  | P2RX3         | 1.484±0.296  | 1.98±0.607   | 1.50E-07 |
| cg08254089 | 20 | 36933189  | BPI           | -0.143±0.248 | -0.715±0.726 | 1.50E-07 |
| cg00394658 | 11 | 48001669  | PTPRJ         | -0.949±0.286 | -0.356±0.746 | 1.50E-07 |
| cg20740029 | 12 | 101603835 | SLC5A8        | -3.805±0.602 | -2.986±0.956 | 1.51E-07 |
| cg11981631 | 11 | 17497967  | ABCC8         | -4.162±0.451 | -3.325±1.041 | 1.52E-07 |
| cg24053375 | 10 | 48392130  | RBFP3         | 3.396±0.218  | 2.929±0.589  | 1.52E-07 |
| cg22039287 | 18 | 40696075  | RIT2          | 1.193±0.256  | 0.575±0.787  | 1.53E-07 |
| cg06305609 | 19 | 17634172  | FAM129C       | -2.42±0.393  | -2.913±0.559 | 1.53E-07 |
| cg16911220 | 12 | 52695728  | KRT86         | 1.665±0.249  | 1.933±0.278  | 1.54E-07 |
| cg00213044 | 12 | 52886438  | KRT6A         | 1.469±0.22   | 1.096±0.458  | 1.55E-07 |
| cg26015133 | 1  | 161692247 | FCRLB         | 2.25±0.158   | 1.829±0.54   | 1.55E-07 |
| cg08291098 | 20 | 62285239  | STMN3         | -4.436±0.416 | -3.673±0.949 | 1.55E-07 |
| cg23173910 | 2  | 74120274  | ACTG2         | 1.788±0.199  | 2.116±0.401  | 1.55E-07 |
| cg04870470 | 1  | 101359714 | EXTL2         | -0.631±0.251 | -0.141±0.608 | 1.56E-07 |
| cg03190825 | 19 | 16045788  | CYP4F11       | -0.294±0.394 | -0.804±0.586 | 1.56E-07 |
| cg09851465 | 1  | 60539671  | C1orf87       | -2.301±0.317 | -1.213±1.408 | 1.57E-07 |
| cg20275133 | 1  | 1342361   | MRPL20        | -4.166±0.455 | -3.612±0.622 | 1.57E-07 |
| cg18557145 | 9  | 35618083  | CDT2          | 2.76±0.311   | 2.306±0.542  | 1.59E-07 |
| cg08779777 | 7  | 106505772 | PIK3CG        | -0.82±0.291  | -0.122±0.89  | 1.59E-07 |
| cg14414534 | 9  | 100286483 | TMOD1         | 3.917±0.346  | 3.478±0.502  | 1.60E-07 |
| cg20225681 | 15 | 65503447  | CILP          | 3.166±0.401  | 2.713±0.49   | 1.61E-07 |
| cg00328227 | 1  | 109204325 | HENMT1        | -0.459±0.279 | -1.105±0.822 | 1.63E-07 |
| cg26525091 | 19 | 496239    | MADCAM1       | -2.384±0.433 | -1.687±0.851 | 1.63E-07 |
| cg23264413 | 19 | 43710277  | PSG4          | 1.326±0.388  | 0.795±0.622  | 1.64E-07 |
| cg05684195 | 3  | 9920572   | CIDEC         | 1.98±0.178   | 1.536±0.569  | 1.65E-07 |
| cg19430430 | 19 | 10121323  | COL5A3        | -4.257±0.378 | -3.782±0.542 | 1.66E-07 |
| cg00516481 | 21 | 44073202  | PDE9A         | -2.493±0.464 | -1.603±1.116 | 1.66E-07 |
| cg02491878 | 7  | 138482580 | TMEM213       | -0.909±0.168 | -1.283±0.476 | 1.66E-07 |
| cg01200060 | 20 | 657283    | SCRT2         | -4.672±0.456 | -3.391±1.651 | 1.67E-07 |
| cg06748315 | 21 | 31864089  | KRTAP19-3     | 2.909±0.412  | 2.259±0.79   | 1.67E-07 |
| cg09407859 | 16 | 66995461  | CES3          | 2.213±0.373  | 1.397±1.036  | 1.67E-07 |
| cg01808508 | 3  | 64009536  | PSMD6         | -0.292±0.224 | -0.672±0.463 | 1.67E-07 |
| cg05360265 | 6  | 147525477 | STXBP5        | -3.934±0.567 | -3.411±0.462 | 1.67E-07 |
| cg06800962 | 3  | 149096029 | TM4SF1        | -1.116±0.253 | -1.633±0.652 | 1.68E-07 |
| cg20318748 | 20 | 25605178  | NANP          | -2.22±0.397  | -2.734±0.592 | 1.69E-07 |
| cg04726446 | 2  | 26624865  | DNC1          | -3.533±0.388 | -2.596±1.198 | 1.69E-07 |
| cg05471297 | 19 | 38924349  | RYR1          | -4.186±0.318 | -3.329±1.103 | 1.69E-07 |
| cg14012294 | 5  | 72794041  | BTF3          | -4.107±0.365 | -4.773±0.831 | 1.69E-07 |
| cg14267151 | 6  | 8066098   | LOC1S5-TXNDC1 | 0.703±0.291  | 0.15±0.693   | 1.69E-07 |
| cg09580336 | 1  | 116915122 | ATP1A1        | -2.101±0.286 | -2.568±0.573 | 1.69E-07 |
| cg05778847 | 19 | 38746538  | PPP1R14A      | -3.319±0.354 | -2.696±0.773 | 1.70E-07 |
| cg26301777 | 13 | 41884544  | NAA16         | 2.761±0.371  | 2.321±0.489  | 1.70E-07 |
| cg07427065 | 7  | 130130596 | MESTIT1       | 0.619±0.151  | 1.038±0.541  | 1.70E-07 |
| cg17384214 | 6  | 31801701  | C6orf48       | 2.741±0.244  | 2.253±0.616  | 1.71E-07 |
| cg07363637 | 6  | 31846996  | SLC44A4       | 0.639±0.256  | 0.042±0.763  | 1.71E-07 |
| cg25259754 | 1  | 157670220 | FCRL3         | -0.359±0.287 | -1.181±1.062 | 1.71E-07 |
| cg02876062 | 10 | 14816654  | FAM107B       | 2.811±0.351  | 2.274±0.651  | 1.72E-07 |
| cg10014293 | 16 | 56703833  | MT1H          | -3.257±0.39  | -2.596±0.816 | 1.73E-07 |
| cg00575744 | 6  | 32908642  | HLA-DMB       | -2.98±0.452  | -3.442±0.464 | 1.73E-07 |
| cg10861599 | 1  | 173176523 | TNFSF4        | -0.639±0.378 | 0.159±1.012  | 1.74E-07 |
| cg19017177 | 19 | 51141227  | SYT3          | -0.115±0.304 | 0.428±0.677  | 1.75E-07 |
| cg07042144 | 19 | 54327404  | NLRP12        | 0.435±0.301  | -0.144±0.728 | 1.76E-07 |
| cg09748975 | 4  | 4864532   | MSX1          | 1.656±0.388  | 2.255±0.727  | 1.76E-07 |

|            |    |           |            |              |              |          |
|------------|----|-----------|------------|--------------|--------------|----------|
| cg27449489 | 17 | 80316860  | TEX19      | 0.381±0.284  | 0.81±0.518   | 1.77E-07 |
| cg08665772 | 1  | 160051377 | KCNJ9      | -1.47±0.367  | -0.796±0.843 | 1.78E-07 |
| cg04184278 | 12 | 21757759  | GYS2       | 1.105±0.312  | 1.547±0.527  | 1.79E-07 |
| cg18766847 | 2  | 135595627 | ACMSD      | 0.985±0.291  | 0.388±0.757  | 1.81E-07 |
| cg18272264 | 2  | 152956036 | CACNB4     | -4.196±0.364 | -3.6±0.733   | 1.81E-07 |
| cg15703357 | 2  | 97171449  | NEURL3     | 0.112±0.344  | -0.416±0.643 | 1.82E-07 |
| cg15835232 | 17 | 53343075  | HLF        | -4.113±0.468 | -3.398±0.868 | 1.83E-07 |
| cg18699916 | 6  | 32133929  | EGFL8      | 2.141±0.288  | 2.538±0.47   | 1.85E-07 |
| cg22386311 | 18 | 28898907  | DSG1       | 0.416±0.313  | -0.054±0.565 | 1.85E-07 |
| cg17026542 | 6  | 132022490 | OR2A4      | 1.931±0.368  | 1.408±0.624  | 1.86E-07 |
| cg11884699 | 6  | 132023285 | OR2A4      | 1.171±0.2    | 1.576±0.508  | 1.88E-07 |
| cg15910208 | 19 | 51522588  | KLK10      | -4.976±0.454 | -4.226±0.927 | 1.88E-07 |
| cg25402049 | 1  | 14029875  | PRDM2      | 2.351±0.213  | 1.993±0.444  | 1.89E-07 |
| cg21530890 | 16 | 1032260   | SOX8       | -3.849±0.607 | -2.579±1.615 | 1.90E-07 |
| cg10691387 | 3  | 51895618  | IQCF2      | 1.113±0.212  | 0.521±0.767  | 1.90E-07 |
| cg05798712 | 6  | 123100907 | FABP7      | 1.371±0.263  | 0.953±0.513  | 1.90E-07 |
| cg17667972 | 12 | 53208293  | KRT4       | 0.497±0.293  | -0.097±0.754 | 1.90E-07 |
| cg13594711 | 7  | 76038785  | SRCRB4D    | 1.275±0.31   | 1.838±0.706  | 1.91E-07 |
| cg20217872 | 12 | 78224480  | NAV3       | -1.931±0.386 | -2.661±0.92  | 1.92E-07 |
| cg14226064 | 20 | 44006560  | TP53TG5    | 1.491±0.195  | 0.925±0.735  | 1.93E-07 |
| cg08861115 | 2  | 113735377 | IL36G      | 1.82±0.4     | 1.095±0.908  | 1.94E-07 |
| cg12011267 | 14 | 104314583 | LINC00637  | -2.798±0.29  | -3.21±0.493  | 1.95E-07 |
| cg08448751 | 3  | 52479601  | SEMA3G     | 1.779±0.226  | 2.09±0.37    | 1.95E-07 |
| cg24113449 | 22 | 25961367  | ADRBK2     | -3.979±0.358 | -3.418±0.687 | 1.95E-07 |
| cg00282347 | 1  | 6241040   | CHD5       | -3.631±0.383 | -2.774±1.098 | 1.96E-07 |
| cg16778809 | 2  | 207308375 | ADAM23     | -4.328±0.517 | -3.122±1.549 | 1.96E-07 |
| cg14078518 | 4  | 80329284  | GK2        | 3.061±0.304  | 2.638±0.505  | 1.97E-07 |
| cg03633120 | 19 | 8387262   | RPS28      | -2.405±0.322 | -1.771±0.803 | 1.98E-07 |
| cg24229963 | 8  | 82633648  | ZFAND1     | -4.399±0.441 | -4.825±0.409 | 2.00E-07 |
| cg13462160 | 22 | 39916704  | ATF4       | -1.243±0.163 | -1.052±0.215 | 2.00E-07 |
| cg22884082 | 6  | 88039023  | GJB7       | 1.583±0.192  | 1.057±0.684  | 2.00E-07 |
| cg06490988 | 3  | 128212001 | GATA2      | -1.435±0.584 | -0.392±1.307 | 2.01E-07 |
| cg16128363 | 18 | 3880558   | DLGAP1-AS3 | 3.131±0.348  | 2.701±0.491  | 2.01E-07 |
| cg00472814 | 21 | 28217676  | ADAMTS1    | -4.571±0.626 | -3.714±1.016 | 2.02E-07 |
| cg27035806 | 5  | 175817338 | 0          | 3.025±0.289  | 2.211±1.06   | 2.06E-07 |
| cg24133080 | 1  | 192128253 | RGS18      | -0.149±0.289 | -0.956±1.03  | 2.07E-07 |
| cg21838334 | 1  | 156646653 | NES        | -3.75±0.478  | -2.916±1.042 | 2.07E-07 |
| cg17651821 | 6  | 27841683  | HIST1H4L   | -3.854±0.305 | -2.669±1.558 | 2.08E-07 |
| cg08896053 | 8  | 50823468  | SNTG1      | -4.043±0.36  | -3.162±1.138 | 2.09E-07 |
| cg14061619 | 2  | 235860118 | SH3BP4     | -4.287±0.349 | -3.73±0.687  | 2.10E-07 |
| cg03139377 | 12 | 323242    | SLC6A12    | -0.052±0.206 | -0.53±0.616  | 2.11E-07 |
| cg10604168 | 15 | 65360370  | RASL12     | -3.035±0.346 | -2.631±0.451 | 2.12E-07 |
| cg12024906 | 19 | 37825679  | HKR1       | -1.647±0.702 | -0.481±1.448 | 2.12E-07 |
| cg19984039 | 1  | 192605388 | RGS13      | -0.197±0.293 | 0.243±0.531  | 2.13E-07 |
| cg15538820 | 9  | 136084818 | OBP2B      | 4.448±0.393  | 3.591±1.099  | 2.14E-07 |
| cg23609672 | 1  | 203144862 | MYBPH      | 1.807±0.361  | 1.179±0.786  | 2.16E-07 |
| cg04925864 | 16 | 67562517  | FAM65A     | -3.197±0.533 | -2.468±0.868 | 2.18E-07 |
| cg24821554 | 13 | 51639953  | GUCY1B2    | 0.358±0.289  | 0.914±0.705  | 2.18E-07 |
| cg12556325 | 7  | 150026731 | ZBED6CL    | 0.58±0.357   | 1.012±0.492  | 2.18E-07 |
| cg12951282 | 17 | 7018416   | ASGR2      | -0.398±0.348 | -1.088±0.878 | 2.19E-07 |
| cg17812431 | 16 | 20364284  | UMOD       | 0.587±0.368  | -0.072±0.829 | 2.19E-07 |
| cg21974239 | 22 | 50700478  | MAPK12     | -4.15±0.338  | -3.68±0.562  | 2.19E-07 |
| cg17226343 | 19 | 2720776   | DIRAS1     | -4.064±0.426 | -3.364±0.869 | 2.21E-07 |
| cg12864581 | 1  | 31660916  | NKAIN1     | 2.479±0.192  | 2.003±0.616  | 2.21E-07 |
| cg10210238 | 9  | 22005995  | CDKN2B     | -0.466±0.305 | 0.321±1.022  | 2.22E-07 |
| cg24697329 | 2  | 131674376 | ARHGEF4    | 2±0.273      | 1.242±0.989  | 2.24E-07 |
| cg26187237 | 2  | 217498574 | IGFBP2     | -4.08±0.725  | -3.191±1.019 | 2.25E-07 |
| cg08136806 | 12 | 52867793  | KRT6C      | 0.111±0.296  | -0.282±0.465 | 2.25E-07 |
| cg09179743 | 9  | 27524436  | IFNK       | 1.646±0.426  | 1.145±0.559  | 2.25E-07 |
| cg07602200 | 12 | 121570875 | P2RX7      | -4.025±0.492 | -3.43±0.677  | 2.26E-07 |
| cg11726593 | 8  | 82598801  | IMPA1      | -1.632±0.275 | -1.142±0.617 | 2.26E-07 |
| cg11529250 | 22 | 45680606  | UPK3A      | -3.753±0.418 | -4.202±0.48  | 2.26E-07 |
| cg25917510 | 12 | 54402888  | HOXC8      | -4.797±0.558 | -3.666±1.446 | 2.26E-07 |
| cg23610820 | 19 | 43774921  | PSG9       | 1.204±0.187  | 0.88±0.407   | 2.27E-07 |
| cg24898863 | 1  | 153363580 | S100A8     | -1.084±0.275 | -1.736±0.845 | 2.30E-07 |
| cg25027167 | 8  | 145551031 | DGAT1      | -3.18±0.395  | -2.456±0.915 | 2.32E-07 |
| cg20082641 | 15 | 69590255  | PAQR5      | 1.792±0.34   | 2.457±0.848  | 2.33E-07 |
| cg06799664 | 17 | 76567121  | DNAH17     | 1.581±0.31   | 2.043±0.566  | 2.33E-07 |
| cg01114088 | 4  | 5021111   | CYTL1      | -3.125±0.765 | -1.883±1.544 | 2.33E-07 |
| cg03311899 | 12 | 123187857 | HCAR2      | 2.777±0.364  | 1.9±1.138    | 2.35E-07 |

|            |    |           |                   |              |              |          |
|------------|----|-----------|-------------------|--------------|--------------|----------|
| cg26035366 | 3  | 26664621  | <i>LRRC3B</i>     | -4.39±0.48   | -3.74±0.775  | 2.38E-07 |
| cg23492043 | 1  | 177134266 | <i>ASTN1</i>      | -3.017±0.258 | -2.237±1.024 | 2.38E-07 |
| cg20610181 | 9  | 35674000  | <i>CA9</i>        | 1.232±0.312  | 0.623±0.778  | 2.39E-07 |
| cg14659404 | 1  | 177134019 | <i>ASTN1</i>      | -2.492±0.309 | -1.933±0.707 | 2.39E-07 |
| cg12601757 | 1  | 76540465  | <i>ST6GALNAC3</i> | -4.129±0.404 | -3.232±1.159 | 2.40E-07 |
| cg08950375 | 2  | 238323400 | <i>COL6A3</i>     | 1.366±0.292  | 1.673±0.32   | 2.41E-07 |
| cg11700584 | 14 | 50088544  | <i>MGAT2</i>      | -2.19±0.32   | -2.758±0.717 | 2.42E-07 |
| cg02471507 | 8  | 82644747  | <i>CHMP4C</i>     | -4.607±0.478 | -5.092±0.495 | 2.42E-07 |
| cg16893574 | 16 | 71392095  | <i>CALB2</i>      | -0.345±0.211 | -0.829±0.628 | 2.43E-07 |
| cg26879282 | 11 | 2817991   | <i>KCNQ1</i>      | 4.047±0.255  | 3.631±0.518  | 2.43E-07 |
| cg17677397 | 17 | 72543519  | <i>CD300C</i>     | 1.382±0.209  | 0.841±0.706  | 2.44E-07 |
| cg19385139 | 13 | 110958361 | <i>COL4A1</i>     | -1.245±0.283 | -0.73±0.651  | 2.44E-07 |
| cg15381313 | 12 | 100867509 | <i>NR1H4</i>      | -0.09±0.289  | 0.508±0.768  | 2.45E-07 |
| cg24024214 | 5  | 180326142 | <i>BTNL8</i>      | 2.19±0.35    | 1.498±0.886  | 2.45E-07 |
| cg21066636 | 17 | 4675292   | <i>TM4SF5</i>     | -0.213±0.212 | -0.635±0.539 | 2.46E-07 |
| cg22215728 | 3  | 61236652  | <i>FHIT</i>       | -1.7±0.394   | -2.25±0.663  | 2.47E-07 |
| cg00687674 | 15 | 69373260  | <i>LINC00277</i>  | 0.072±0.258  | -0.423±0.631 | 2.48E-07 |
| cg02029926 | 4  | 74734874  | <i>CXCL1</i>      | -3.591±0.376 | -2.823±0.988 | 2.50E-07 |
| cg06974755 | 9  | 135996931 | <i>RALGDS</i>     | -3.771±0.461 | -4.266±0.53  | 2.52E-07 |
| cg13391235 | 16 | 85316611  | <i>LINC00311</i>  | 1.059±0.347  | 0.403±0.838  | 2.53E-07 |
| cg27655855 | 20 | 23549455  | <i>CST9L</i>      | 1.704±0.222  | 1.102±0.79   | 2.55E-07 |
| cg20870362 | 9  | 36169175  | <i>CCIN</i>       | 1.199±0.209  | 1.532±0.414  | 2.57E-07 |
| cg23410627 | 10 | 90966807  | <i>CH25H</i>      | -4.22±0.457  | -2.703±2.004 | 2.58E-07 |
| cg13749822 | 4  | 145566663 | <i>HHIP</i>       | -2.338±0.612 | -1.607±0.835 | 2.58E-07 |
| cg16016036 | 2  | 1417109   | <i>TPO</i>        | 3.138±0.273  | 2.552±0.758  | 2.61E-07 |
| cg24662961 | 16 | 54320670  | <i>IRX3</i>       | -2.98±0.528  | -2.318±0.774 | 2.62E-07 |
| cg12629325 | 5  | 140306458 | <i>PCDHAC1</i>    | -3.785±0.721 | -2.954±0.934 | 2.62E-07 |
| cg21353232 | 22 | 26564879  | <i>SEZ6L</i>      | -3.034±0.457 | -2.147±1.136 | 2.62E-07 |
| cg13206017 | 3  | 187388225 | <i>SST</i>        | -2.725±0.426 | -1.857±1.117 | 2.63E-07 |
| cg16155382 | 1  | 24646191  | <i>GRHL3</i>      | -3.349±0.354 | -3.761±0.466 | 2.63E-07 |
| cg22750254 | 10 | 13043421  | <i>CCDC3</i>      | -4.052±0.489 | -3.076±1.255 | 2.66E-07 |
| cg16714091 | 9  | 18473902  | <i>ADAMTSL1</i>   | -1.679±0.284 | -0.839±1.107 | 2.66E-07 |
| cg23663332 | 8  | 33341954  | <i>MAK16</i>      | 1.148±0.204  | 0.62±0.691   | 2.68E-07 |
| cg24262469 | 3  | 156391694 | <i>TIPARP</i>     | -1.371±0.405 | -1.771±0.403 | 2.68E-07 |
| cg02657438 | 14 | 81864899  | <i>STON2</i>      | 0.971±0.302  | 0.366±0.778  | 2.68E-07 |
| cg09126273 | 12 | 15475767  | <i>PTPRO</i>      | -3.222±0.491 | -2.373±1.073 | 2.70E-07 |
| cg12100791 | 16 | 31214417  | <i>PYCARD</i>     | -0.923±0.288 | -0.263±0.858 | 2.70E-07 |
| cg22179082 | 13 | 27334259  | <i>GPR12</i>      | -3.037±0.314 | -2.342±0.902 | 2.71E-07 |
| cg19205041 | 6  | 143929511 | <i>PHACTR2</i>    | 0.633±0.274  | 1.311±0.887  | 2.72E-07 |
| cg15729869 | 9  | 135457839 | <i>BARHL1</i>     | -4.757±0.668 | -3.808±1.156 | 2.73E-07 |
| cg18176712 | 4  | 671489    | <i>MYL5</i>       | 0.987±0.115  | 0.693±0.384  | 2.75E-07 |
| cg02166532 | 11 | 2159853   | <i>IGF2</i>       | -1.436±0.502 | -0.916±0.545 | 2.75E-07 |
| cg20366831 | 19 | 3760955   | <i>APBA3</i>      | 0.846±0.288  | 0.35±0.627   | 2.76E-07 |
| cg03386373 | 2  | 231860456 | <i>LOC348761</i>  | 1.421±0.266  | 0.774±0.847  | 2.76E-07 |
| cg16893614 | 1  | 110614450 | <i>ALX3</i>       | 2.491±0.326  | 2.854±0.401  | 2.78E-07 |
| cg16899306 | 6  | 32732585  | <i>HLA-DQB2</i>   | 1.177±1.1    | 0.048±1.123  | 2.79E-07 |
| cg09965258 | 9  | 14313762  | <i>NFIB</i>       | -4.741±0.479 | -4.22±0.567  | 2.81E-07 |
| cg22679003 | 18 | 25756510  | <i>CDH2</i>       | -4.124±0.437 | -3.389±0.926 | 2.81E-07 |
| cg25697314 | 12 | 68619556  | <i>IL26</i>       | 1.175±0.238  | 0.595±0.759  | 2.82E-07 |
| cg10533434 | 18 | 61329226  | <i>SERPINB3</i>   | 0.398±0.558  | -0.232±0.704 | 2.83E-07 |
| cg12322132 | 11 | 2165656   | <i>IGF2-AS</i>    | -4.449±0.431 | -3.567±1.14  | 2.84E-07 |
| cg24475171 | 9  | 132598886 | <i>USP20</i>      | -1.19±0.31   | -0.543±0.838 | 2.85E-07 |
| cg06817264 | 11 | 66335649  | <i>CTSF</i>       | -2.27±0.424  | -1.62±0.806  | 2.86E-07 |
| cg17253459 | 1  | 114522670 | <i>OLFML3</i>     | 0.991±0.211  | 1.459±0.609  | 2.86E-07 |
| cg26224139 | 9  | 138393760 | <i>MRPS2</i>      | 2.678±0.334  | 3.009±0.336  | 2.88E-07 |
| cg18180783 | 10 | 75402320  | <i>MYOZ1</i>      | 3.052±0.186  | 2.348±0.939  | 2.89E-07 |
| cg06454084 | 19 | 47158242  | <i>DACT3</i>      | 0.62±0.234   | 1.082±0.596  | 2.90E-07 |
| cg13994177 | 15 | 25296464  | <i>SNORD116-1</i> | 2.414±0.229  | 1.863±0.722  | 2.91E-07 |
| cg24076399 | 20 | 23618348  | <i>CST3</i>       | -4.795±0.583 | -4.095±0.807 | 2.91E-07 |
| cg10839997 | 11 | 66115647  | <i>B3GNT1</i>     | -4.925±0.634 | -3.905±1.281 | 2.96E-07 |
| cg21321735 | 2  | 241760164 | <i>KIF1A</i>      | -5.766±0.851 | -4.448±1.642 | 2.98E-07 |
| cg27270684 | 7  | 55757158  | <i>FKBP9L</i>     | -3.528±0.36  | -3.044±0.583 | 2.99E-07 |
| cg03764585 | 1  | 203320223 | <i>FMOD</i>       | -1.904±0.481 | -2.466±0.641 | 2.99E-07 |
| cg16509658 | 5  | 160975347 | <i>GABRB2</i>     | -4.653±0.487 | -3.859±0.999 | 2.99E-07 |
| cg10287137 | 11 | 72929054  | <i>P2RY2</i>      | 0.622±0.279  | 0.128±0.63   | 3.00E-07 |
| cg15817236 | 11 | 44331362  | <i>ALX4</i>       | -4.97±0.494  | -3.867±1.439 | 3.00E-07 |
| cg01265637 | 20 | 2795930   | <i>C20orf141</i>  | 2.938±0.202  | 2.626±0.389  | 3.01E-07 |
| cg16752583 | 7  | 142583731 | <i>TRPV6</i>      | 0.202±0.254  | -0.276±0.615 | 3.01E-07 |
| cg07592353 | 5  | 161113339 | <i>GABRA6</i>     | 2.617±0.29   | 1.962±0.856  | 3.01E-07 |
| cg01557297 | 14 | 23822017  | <i>SLC22A17</i>   | -5.312±0.684 | -4.318±1.222 | 3.02E-07 |

|            |    |           |              |              |              |          |
|------------|----|-----------|--------------|--------------|--------------|----------|
| cg12339029 | 2  | 211179902 | MYL1         | 2.744±0.315  | 2.013±0.956  | 3.02E-07 |
| cg04991214 | 1  | 161089118 | NIT1         | 2.388±0.272  | 1.664±0.956  | 3.04E-07 |
| cg13406950 | 1  | 89530664  | GBP1         | -2.58±0.458  | -2.006±0.676 | 3.06E-07 |
| cg13686115 | 10 | 60936626  | PHYHIPL      | -3.703±0.398 | -2.953±0.965 | 3.09E-07 |
| cg15796941 | 12 | 107711872 | BTBD11       | -3.6±0.385   | -2.78±1.068  | 3.11E-07 |
| cg13859324 | 17 | 33474692  | UNC45B       | -0.24±0.238  | 0.182±0.539  | 3.13E-07 |
| cg19290962 | 20 | 2517613   | TMC2         | 0.701±0.287  | 0.085±0.802  | 3.14E-07 |
| cg09260830 | 9  | 80263587  | GNA14        | -3.16±0.307  | -2.755±0.487 | 3.15E-07 |
| cg04216597 | 17 | 48639836  | CACNA1G-AS1  | -3.217±0.285 | -2.64±0.748  | 3.15E-07 |
| cg14913925 | 7  | 99149239  | FAM200A      | -3.51±0.484  | -2.711±1.01  | 3.17E-07 |
| cg12914014 | 16 | 9058365   | USP7         | -1.113±0.246 | -1.502±0.488 | 3.18E-07 |
| cg04230060 | 9  | 114937992 | SUSD1        | 0.26±0.335   | 0.804±0.687  | 3.20E-07 |
| cg05546038 | 16 | 67207033  | NOL3         | 1.656±0.252  | 1.033±0.82   | 3.21E-07 |
| cg21942546 | 7  | 73154357  | ABHD11       | 4.009±0.385  | 3.231±1.009  | 3.22E-07 |
| cg10935709 | 9  | 179280    | CBWD1        | -5.026±0.304 | -5.363±0.374 | 3.24E-07 |
| cg10940418 | 6  | 33167305  | RXRB         | -0.251±0.443 | 0.388±0.788  | 3.25E-07 |
| cg12420104 | 9  | 977109    | DMRT3        | -3.284±0.527 | -2.408±1.111 | 3.25E-07 |
| cg07189381 | 19 | 55660514  | TNNT1        | -1.899±0.326 | -1.367±0.671 | 3.25E-07 |
| cg19636871 | 15 | 59499391  | LDHAL6B      | 3.567±0.258  | 3.176±0.488  | 3.27E-07 |
| cg11657615 | 16 | 67449861  | ZDHHC1       | -3.473±0.354 | -3.022±0.536 | 3.27E-07 |
| cg02416716 | 11 | 6948024   | ZNF215       | -5.613±0.411 | -4.695±1.203 | 3.27E-07 |
| cg06594008 | 22 | 41033637  | MKL1         | -2.268±0.347 | -2.736±0.567 | 3.30E-07 |
| cg26159905 | 7  | 150884914 | ASB10        | 0.851±0.171  | 0.483±0.48   | 3.31E-07 |
| cg27377213 | 20 | 37433803  | PPP1R16B     | 0.029±0.276  | 0.765±0.975  | 3.33E-07 |
| cg20401945 | 16 | 29912460  | ASPHD1       | -0.798±0.262 | -0.28±0.672  | 3.33E-07 |
| cg02126753 | 7  | 44143998  | AEBP1        | -3.891±0.383 | -3.001±1.171 | 3.35E-07 |
| cg09485593 | 16 | 17566099  | XYLT1        | 3.006±0.243  | 2.619±0.488  | 3.36E-07 |
| cg00136405 | 4  | 123542198 | IL21         | 0.296±0.25   | -0.281±0.751 | 3.37E-07 |
| cg12343638 | 5  | 140588231 | PCDHB12      | -2.721±0.385 | -2.028±0.89  | 3.38E-07 |
| cg08315770 | 6  | 39281885  | KCNK17       | -3.698±0.604 | -2.755±1.184 | 3.38E-07 |
| cg05358291 | 19 | 16009219  | CYP4F2       | 0.177±0.254  | -0.422±0.789 | 3.38E-07 |
| cg10693071 | 5  | 114516422 | TRIM36       | -1.926±0.311 | -1.094±1.104 | 3.40E-07 |
| cg22244418 | 16 | 56484117  | NUDT21       | 1.739±0.277  | 2.115±0.456  | 3.41E-07 |
| cg02905245 | 3  | 112359652 | CCDC80       | -1.267±0.397 | -0.717±0.672 | 3.41E-07 |
| cg09911342 | 7  | 117067919 | ASZ1         | 2.573±0.332  | 1.802±1.016  | 3.42E-07 |
| cg03310469 | 2  | 45236672  | SIX2         | -4.539±0.899 | -3.484±1.216 | 3.43E-07 |
| cg17457560 | 8  | 32405851  | NRG1         | -3.162±0.586 | -2.424±0.875 | 3.43E-07 |
| cg15765694 | 9  | 104358101 | PPP3R2       | 1.021±0.247  | 0.465±0.73   | 3.43E-07 |
| cg25468723 | 22 | 26566058  | SEZ6L        | -5.058±0.37  | -4.57±0.589  | 3.43E-07 |
| cg05992340 | 5  | 58882243  | PDE4D        | 2.163±0.414  | 2.609±0.491  | 3.48E-07 |
| cg25088874 | 4  | 95678817  | BMPR1B       | -4.677±0.673 | -3.8±1.053   | 3.48E-07 |
| cg10065416 | 17 | 41910894  | MPP3         | -4.677±0.403 | -4.17±0.601  | 3.50E-07 |
| cg22827524 | 1  | 222910746 | FAM177B      | 2.718±0.184  | 2.24±0.634   | 3.51E-07 |
| cg03460527 | 1  | 95008117  | F3           | -3.913±0.345 | -3.417±0.613 | 3.51E-07 |
| cg26962295 | 16 | 28961797  | NFATC2IP     | -1.268±0.365 | -1.832±0.708 | 3.53E-07 |
| cg18671950 | 15 | 48936953  | FBN1         | -4.348±0.592 | -3.061±1.689 | 3.54E-07 |
| cg10150813 | 4  | 25865178  | SEL1L3       | -1.502±0.334 | -2.093±0.759 | 3.54E-07 |
| cg15164958 | 7  | 54609587  | VSTM2A       | -3.877±0.486 | -3.149±0.909 | 3.54E-07 |
| cg15842483 | 8  | 90914033  | OSGIN2       | -3.876±0.436 | -4.355±0.534 | 3.55E-07 |
| cg09173897 | 14 | 94639732  | PPP4R4       | -1.118±0.316 | -0.514±0.784 | 3.55E-07 |
| cg10791260 | 9  | 117568588 | TNFSF15      | -3.566±0.428 | -3.999±0.455 | 3.56E-07 |
| cg09298484 | 2  | 99759406  | C2orf15      | -0.063±0.299 | 0.302±0.425  | 3.56E-07 |
| cg27488807 | 5  | 147691898 | SPINK7       | 0.175±0.299  | 0.548±0.441  | 3.59E-07 |
| cg20520888 | 8  | 145086243 | SPATC1       | -1.58±0.344  | -0.995±0.747 | 3.59E-07 |
| cg22594309 | 1  | 202679504 | SYT2         | -4.874±0.697 | -3.598±1.648 | 3.62E-07 |
| cg01078689 | 19 | 43691869  | PSG5         | 1.057±0.151  | 0.809±0.315  | 3.62E-07 |
| cg05482722 | 13 | 52598175  | UTP14C       | 2.765±0.468  | 3.184±0.382  | 3.62E-07 |
| cg08918749 | 8  | 19797445  | LPL          | -3.349±0.487 | -2.674±0.827 | 3.63E-07 |
| cg18433380 | 20 | 36149194  | NNAT         | 1.438±0.274  | 1.887±0.572  | 3.63E-07 |
| cg26232187 | 15 | 88799300  | NTRK3        | -5.866±0.636 | -4.931±1.164 | 3.63E-07 |
| cg14900471 | 8  | 11561620  | GATA4        | -4.287±0.676 | -3.056±1.589 | 3.63E-07 |
| cg10150530 | 12 | 25205468  | LRMP         | -3.182±0.388 | -2.2±1.302   | 3.64E-07 |
| cg13628514 | 12 | 110271439 | TRPV4        | -1.041±0.245 | -0.66±0.481  | 3.64E-07 |
| cg03558807 | 5  | 111495981 | EPB41L4A-AS1 | 3.481±0.201  | 3.189±0.363  | 3.65E-07 |
| cg23144899 | 2  | 208994373 | CRYGC        | 1.896±0.15   | 1.694±0.245  | 3.65E-07 |
| cg10730712 | 5  | 178017827 | COL23A1      | -4.545±0.5   | -3.381±1.538 | 3.68E-07 |
| cg24855780 | 11 | 57089366  | TNKS1BP1     | 0.413±0.252  | -0.157±0.751 | 3.70E-07 |
| cg20176989 | 19 | 55362650  | KIR3DL2      | 0.345±0.276  | -0.149±0.636 | 3.70E-07 |
| cg05385377 | 1  | 15480844  | TMEM51       | -3.575±0.335 | -2.916±0.858 | 3.70E-07 |
| cg10530281 | 12 | 115122054 | TBX3         | -4.394±0.55  | -3.263±1.48  | 3.72E-07 |

|            |    |           |          |              |              |          |
|------------|----|-----------|----------|--------------|--------------|----------|
| cg15559737 | 22 | 27016806  | CRYBA4   | 2.106±0.318  | 1.782±0.343  | 3.74E-07 |
| cg01144251 | 19 | 51514146  | KLK9     | 1.477±0.244  | 0.899±0.766  | 3.75E-07 |
| cg15175266 | 5  | 22854704  | CDH12    | 1.041±0.388  | 0.328±0.923  | 3.75E-07 |
| cg24977027 | 2  | 88469347  | THNSL2   | 2.042±0.45   | 1.229±1.049  | 3.75E-07 |
| cg26540515 | 20 | 896349    | ANGPT4   | 1.582±0.265  | 0.992±0.779  | 3.76E-07 |
| cg03605761 | 19 | 663973    | RNF126   | 1.224±0.491  | 0.607±0.735  | 3.79E-07 |
| cg06811800 | 13 | 114312105 | ATP4B    | 2.182±0.332  | 1.75±0.522   | 3.79E-07 |
| cg05832051 | 19 | 54369469  | MYADM    | -4.56±0.548  | -3.692±1.1   | 3.80E-07 |
| cg21624282 | 13 | 113030783 | SPACA7   | 2.229±0.336  | 1.458±1.018  | 3.80E-07 |
| cg24812167 | 9  | 139293358 | SNAPC4   | -0.701±0.234 | -0.342±0.453 | 3.82E-07 |
| cg01906055 | 2  | 97000811  | NCAPH    | -0.04±0.261  | -0.479±0.562 | 3.83E-07 |
| cg16652259 | 2  | 172949501 | DLX1     | -2.36±0.316  | -1.327±1.389 | 3.84E-07 |
| cg20937139 | 4  | 157892758 | PDGFC    | -2.59±0.814  | -1.687±1.019 | 3.90E-07 |
| cg18107072 | 16 | 67427811  | TPPP3    | -3.506±0.486 | -2.935±0.663 | 3.90E-07 |
| cg14338062 | 12 | 57883279  | MARS     | 2.801±0.236  | 2.497±0.367  | 3.90E-07 |
| cg25762706 | 8  | 27115867  | STMN4    | 1.304±0.301  | 1.73±0.527   | 3.91E-07 |
| cg10051054 | 1  | 3669172   | CCDC27   | 2.211±0.477  | 1.595±0.742  | 3.93E-07 |
| cg10725344 | 7  | 135433639 | FAM180A  | 0.685±0.358  | 0.052±0.816  | 3.96E-07 |
| cg10887021 | 5  | 140474145 | PCDHB2   | -3.456±0.398 | -2.721±0.954 | 3.97E-07 |
| cg07845392 | 17 | 79678158  | SLC25A10 | -0.436±0.216 | 0.191±0.841  | 3.98E-07 |
| cg18555117 | 14 | 53620401  | DDHD1    | -2.139±0.304 | -2.741±0.787 | 3.99E-07 |
| cg17095731 | 1  | 53794313  | LRP8     | 1.258±0.322  | 1.789±0.679  | 3.99E-07 |
| cg21435336 | 19 | 17392852  | ANKLE1   | -4.158±0.354 | -3.226±1.244 | 4.00E-07 |
| cg23855818 | 12 | 105323396 | SLC41A2  | 0.671±0.282  | 1.02±0.409   | 4.01E-07 |
| cg20811607 | 6  | 109760831 | SMPD2    | 1.283±0.28   | 0.61±0.894   | 4.03E-07 |
| cg13547237 | 11 | 65687877  | DRAP1    | -1.636±0.281 | -1.274±0.436 | 4.04E-07 |
| cg20340242 | 2  | 102608349 | IL1R2    | -0.286±0.197 | -0.817±0.71  | 4.05E-07 |
| cg10999429 | 12 | 52300973  | ACVRL1   | -4.708±0.47  | -4.114±0.712 | 4.05E-07 |
| cg03283694 | 19 | 50464713  | SIGLEC11 | 0.061±0.298  | -0.456±0.666 | 4.08E-07 |
| cg04444771 | 10 | 45473712  | C10orf10 | -3.021±0.38  | -2.482±0.67  | 4.12E-07 |
| cg07109287 | 9  | 126774073 | LHX2     | -2.952±0.56  | -1.686±1.677 | 4.13E-07 |
| cg15337006 | 16 | 31271009  | ITGAM    | 0.923±0.339  | 1.43±0.637   | 4.15E-07 |
| cg10883621 | 2  | 26624604  | DRC1     | -2.15±0.318  | -1.51±0.841  | 4.17E-07 |
| cg14893161 | 1  | 205819251 | PM2OD1   | -2.077±0.656 | -1.073±1.269 | 4.18E-07 |
| cg07816074 | 4  | 8201560   | SH3TC1   | 0.061±0.198  | -0.409±0.624 | 4.18E-07 |
| cg03552688 | 3  | 138822369 | BPESC1   | 2.224±0.258  | 1.686±0.709  | 4.19E-07 |
| cg16270890 | 16 | 1875963   | HAGH     | -1.839±0.268 | -2.294±0.586 | 4.21E-07 |
| cg02590345 | 9  | 103790959 | LPPR1    | -3.155±0.351 | -2.506±0.846 | 4.22E-07 |
| cg12832649 | 5  | 136834863 | SPOCK1   | -3.168±0.55  | -2.247±1.184 | 4.32E-07 |
| cg07331806 | 22 | 21319894  | AIFM3    | -1.987±0.283 | -1.557±0.544 | 4.35E-07 |
| cg18878432 | 17 | 46683409  | HOXB6    | -0.016±0.334 | 0.611±0.819  | 4.39E-07 |
| cg13235447 | 9  | 21385440  | IFNA2    | -0.635±0.3   | -1.256±0.811 | 4.40E-07 |
| cg20543571 | 15 | 45248878  | C15orf43 | 3.165±0.305  | 2.787±0.452  | 4.40E-07 |
| cg14930674 | 15 | 48500240  | SLC12A1  | 2.476±0.312  | 1.911±0.736  | 4.42E-07 |
| cg23894003 | 16 | 30676444  | FBR3     | 2.106±0.168  | 2.281±0.191  | 4.43E-07 |
| cg15447486 | 12 | 123201676 | HCAR3    | 1.236±0.288  | 0.523±0.953  | 4.44E-07 |
| cg04600618 | 6  | 43612980  | RSPH9    | -3.635±0.517 | -2.485±1.527 | 4.46E-07 |
| cg22161874 | 9  | 77503042  | TRPM6    | 2.569±0.285  | 2.169±0.492  | 4.46E-07 |
| cg03731898 | 2  | 207804081 | CPO      | 1.674±0.278  | 1.188±0.63   | 4.46E-07 |
| cg15013019 | 19 | 13213451  | LYL1     | -2.985±0.452 | -2.179±1.048 | 4.47E-07 |
| cg12268344 | 16 | 11374723  | PRM1     | 2.632±0.185  | 2.013±0.838  | 4.49E-07 |
| cg14654731 | 4  | 122685145 | PP12613  | 1.392±0.278  | 0.896±0.645  | 4.51E-07 |
| cg07617246 | 15 | 65715951  | IGDCC4   | 0.51±0.177   | 0.79±0.358   | 4.53E-07 |
| cg19257550 | 9  | 35673909  | CA9      | 1.412±0.356  | 0.654±1.004  | 4.54E-07 |
| cg16046376 | 11 | 66721779  | PC       | 1.95±0.298   | 2.314±0.435  | 4.54E-07 |
| cg24480859 | 1  | 9129791   | SLC2A5   | -1.722±0.454 | -1.066±0.823 | 4.58E-07 |
| cg13410437 | 11 | 7818165   | OR5P2    | 2.85±0.504   | 1.829±1.334  | 4.62E-07 |
| cg19162158 | 8  | 32405427  | NRG1     | -3.847±0.64  | -3.1±0.875   | 4.64E-07 |
| cg11428724 | 1  | 18957632  | PAX7     | -2.801±0.575 | -1.617±1.566 | 4.64E-07 |
| cg15055101 | 19 | 6766609   | SH2D3A   | -0.89±0.317  | -1.321±0.531 | 4.66E-07 |
| cg21003606 | 7  | 71877237  | CALN1    | 3.399±0.313  | 2.537±1.162  | 4.72E-07 |
| cg19668234 | 3  | 46759449  | PRSS50   | -0.009±0.418 | 0.589±0.75   | 4.73E-07 |
| cg15427448 | 11 | 117186896 | BACE1    | -4.647±1.086 | -3.503±1.264 | 4.77E-07 |
| cg25226014 | 3  | 45984942  | CXCR6    | 1.038±0.363  | 0.557±0.591  | 4.78E-07 |
| cg12813792 | 20 | 56725695  | C20orf85 | -0.469±0.262 | -1.058±0.784 | 4.78E-07 |
| cg04096767 | 11 | 32449450  | WT1      | -1.363±0.488 | -0.622±0.943 | 4.80E-07 |
| cg19584957 | 1  | 1114579   | TTL10    | 4.717±0.403  | 4.179±0.663  | 4.80E-07 |
| cg27465566 | 5  | 14142574  | TRIO     | -4.052±0.567 | -3.243±1.015 | 4.81E-07 |
| cg04149472 | 8  | 18066144  | NAT1     | 2.592±0.174  | 2.238±0.468  | 4.81E-07 |
| cg13320683 | 10 | 62761819  | RHOBTB1  | 0.96±0.289   | 1.396±0.553  | 4.82E-07 |

|            |    |           |            |              |              |          |
|------------|----|-----------|------------|--------------|--------------|----------|
| cg01185754 | 1  | 95006729  | F3         | -1.457±0.342 | -1.983±0.67  | 4.84E-07 |
| cg02144933 | 2  | 201450690 | AOX1       | -4.65±0.5    | -3.856±1.018 | 4.85E-07 |
| cg21004129 | 2  | 219032024 | CXCR1      | 1.286±0.252  | 0.885±0.515  | 4.85E-07 |
| cg11195002 | 19 | 10399805  | ICAM5      | -3.137±0.363 | -3.6±0.563   | 4.85E-07 |
| cg13334054 | 3  | 113956215 | ZNF80      | 2.262±0.241  | 1.821±0.577  | 4.85E-07 |
| cg13163729 | 2  | 45169447  | SIX3       | -3.984±0.346 | -3.36±0.815  | 4.87E-07 |
| cg01535453 | 12 | 121163887 | ACADS      | -4.842±0.544 | -4.194±0.765 | 4.90E-07 |
| cg22252999 | 4  | 76996414  | ART3       | 0.387±0.184  | 0.736±0.459  | 4.92E-07 |
| cg24276445 | 6  | 88854953  | CNR1       | 2.721±0.286  | 2.318±0.504  | 4.92E-07 |
| cg06236276 | 6  | 160680078 | SLC22A2    | 1.01±0.165   | 1.366±0.474  | 4.93E-07 |
| cg02981853 | 19 | 7445850   | 0          | 1.344±0.315  | 0.864±0.61   | 4.94E-07 |
| cg16617137 | 19 | 52036199  | SIGLEC6    | 0.971±0.278  | 0.376±0.785  | 4.96E-07 |
| cg10146929 | 6  | 26017939  | HIST1H1A   | -1.696±0.376 | -0.891±1.071 | 4.97E-07 |
| cg12703269 | 15 | 77286232  | PSTPIP1    | 1.45±0.292   | 1.009±0.562  | 4.97E-07 |
| cg08900043 | 12 | 54378896  | HOXC10     | -2.197±0.267 | -1.216±1.337 | 4.99E-07 |
| cg14386061 | 8  | 21771446  | DOK2       | 0.529±0.362  | -0.009±0.681 | 5.00E-07 |
| cg19096540 | 5  | 133748191 | CDKN2AIPNL | -1.925±0.322 | -2.325±0.481 | 5.01E-07 |
| cg15481539 | 8  | 6913441   | DEFA5      | 3.009±0.208  | 2.565±0.591  | 5.03E-07 |
| cg00436603 | 10 | 135340740 | CYP2E1     | 1.186±0.332  | 0.539±0.855  | 5.03E-07 |
| cg11812202 | 10 | 118305409 | PNLIP      | 1.525±0.267  | 0.859±0.896  | 5.04E-07 |
| cg03718677 | 1  | 151148266 | TMOD4      | 1.934±0.345  | 2.31±0.426   | 5.04E-07 |
| cg11819637 | 3  | 184095505 | THPO       | 0.672±0.29   | 0.228±0.567  | 5.06E-07 |
| cg13343486 | 19 | 51520533  | KLK10      | -5.1±0.563   | -3.911±1.582 | 5.07E-07 |
| cg01731685 | 22 | 17565455  | IL17RA     | -4.45±0.491  | -3.914±0.608 | 5.07E-07 |
| cg12788467 | 17 | 36105335  | HNF1B      | -3.1±0.354   | -3.514±0.487 | 5.07E-07 |
| cg01836044 | 13 | 61989203  | PCDH20     | -4.757±0.46  | -4.175±0.706 | 5.07E-07 |
| cg24997944 | 3  | 19189709  | KCNH8      | -4.133±0.446 | -3.488±0.814 | 5.08E-07 |
| cg17286640 | 4  | 55991202  | KDR        | -4.818±0.41  | -4.139±0.88  | 5.11E-07 |
| cg15649193 | 19 | 14640403  | TECR       | -4.133±0.443 | -3.7±0.451   | 5.13E-07 |
| cg01320507 | 1  | 229440351 | SPHAR      | 1.286±0.336  | 1.587±0.278  | 5.15E-07 |
| cg09953122 | 20 | 23471693  | CST8       | 3.325±0.29   | 2.921±0.505  | 5.15E-07 |
| cg18089852 | 5  | 76507050  | PDE8B      | -4.19±0.779  | -3.145±1.293 | 5.16E-07 |
| cg09511421 | 4  | 116034871 | NDST4      | -1.882±0.428 | -1.207±0.868 | 5.20E-07 |
| cg12639234 | 8  | 18248964  | NAT2       | 0.484±0.315  | -0.014±0.64  | 5.24E-07 |
| cg00418150 | 11 | 44327869  | ALX4       | 0.405±0.207  | 0.778±0.489  | 5.25E-07 |
| cg19339848 | 6  | 74170937  | MTO1       | -1.872±0.508 | -2.562±0.858 | 5.26E-07 |
| cg03914452 | 7  | 155464145 | RBM33      | 1.106±0.371  | 1.496±0.413  | 5.26E-07 |
| cg23002761 | 1  | 16085642  | FBLIM1     | -4.31±0.81   | -3.399±1.054 | 5.27E-07 |
| cg07654934 | 3  | 158390329 | LXN        | -3.991±0.408 | -2.95±1.405  | 5.28E-07 |
| cg00657582 | 14 | 21904906  | CHD8       | -3.743±0.435 | -3.168±0.709 | 5.31E-07 |
| cg00138126 | 20 | 56286697  | PMEPA1     | 1.047±0.214  | 0.505±0.732  | 5.35E-07 |
| cg23674882 | 2  | 74780272  | LOXL3      | 0.222±0.199  | 0.585±0.477  | 5.35E-07 |
| cg08909157 | 9  | 215561    | C9orf66    | -1.683±0.445 | -2.141±0.501 | 5.36E-07 |
| cg06096336 | 2  | 231989800 | HTR2B      | -0.067±0.273 | 0.446±0.677  | 5.39E-07 |
| cg09813840 | 12 | 109027422 | SELPLG     | -0.663±0.355 | -1.327±0.876 | 5.39E-07 |
| cg14333565 | 19 | 5824065   | NRTN       | 1.823±0.283  | 1.318±0.663  | 5.39E-07 |
| cg25464840 | 10 | 14372910  | FRMD4A     | 0.022±0.211  | 0.532±0.687  | 5.41E-07 |
| cg26232558 | 17 | 3195808   | OR3A1      | 1.692±0.259  | 1.105±0.787  | 5.41E-07 |
| cg14885742 | 11 | 320956    | IFITM3     | -1.451±0.523 | -0.889±0.619 | 5.44E-07 |
| cg23855093 | 3  | 100328713 | GPR128     | 1.404±0.303  | 0.864±0.71   | 5.49E-07 |
| cg18542098 | 19 | 36499326  | SYNE4      | 0.968±0.246  | 0.457±0.682  | 5.52E-07 |
| cg18546419 | 5  | 176433891 | UIMC1      | -4.313±0.38  | -4.718±0.455 | 5.55E-07 |
| cg04759439 | 3  | 56502612  | ERC2       | -2.109±0.63  | -1.371±0.874 | 5.58E-07 |
| cg05200628 | 1  | 160681760 | CD48       | 0.098±0.29   | 0.707±0.813  | 5.60E-07 |
| cg26045434 | 8  | 21987861  | HR         | -2.641±0.368 | -1.972±0.881 | 5.60E-07 |
| cg09636671 | 1  | 201915873 | LMOD1      | -3.205±0.564 | -3.742±0.553 | 5.64E-07 |
| cg08315277 | 22 | 46659398  | PKDREJ     | 4.033±0.352  | 3.575±0.564  | 5.65E-07 |
| cg03490200 | 12 | 8975196   | A2ML1      | 2.712±0.275  | 2.168±0.723  | 5.66E-07 |
| cg10617171 | 19 | 35521856  | SCN1B      | -4.469±0.843 | -3.529±1.087 | 5.67E-07 |
| cg13806135 | 13 | 58205045  | PCDH17     | -4.707±0.4   | -3.785±1.242 | 5.68E-07 |
| cg19391527 | 8  | 28173732  | PNOC       | 0.332±0.308  | -0.195±0.689 | 5.69E-07 |
| cg18797282 | 3  | 50387146  | CYB561D2   | 3.59±0.186   | 3.387±0.231  | 5.70E-07 |
| cg17830308 | 5  | 134872124 | NEUROG1    | -2.799±0.321 | -2.238±0.737 | 5.70E-07 |
| cg26682500 | 13 | 43356116  | FAM216B    | 1.966±0.246  | 1.443±0.7    | 5.73E-07 |
| cg12727795 | 5  | 149535695 | PDGFRB     | -4.143±0.416 | -3.336±1.071 | 5.79E-07 |
| cg03939688 | 9  | 110251706 | KLF4       | -5.064±0.575 | -4.445±0.702 | 5.80E-07 |
| cg13181284 | 12 | 52845687  | KRT6B      | 2.889±0.447  | 2.299±0.731  | 5.82E-07 |
| cg05633152 | 14 | 70263811  | SLC10A1    | 3.21±0.231   | 2.783±0.564  | 5.92E-07 |
| cg00515905 | 1  | 110306507 | EPS8L3     | 3.326±0.309  | 2.829±0.644  | 5.93E-07 |
| cg24919972 | 3  | 46037608  | FYCO1      | -1.977±0.311 | -2.333±0.418 | 5.95E-07 |

|            |    |           |           |              |              |          |
|------------|----|-----------|-----------|--------------|--------------|----------|
| cg26354398 | 9  | 116224036 | RGS3      | 2.472±0.308  | 2.122±0.411  | 5.95E-07 |
| cg13843613 | 1  | 177140126 | FAM5B     | -4.111±0.485 | -3.133±1.306 | 5.95E-07 |
| cg20579480 | 1  | 183622007 | APOBEC4   | -1.095±0.372 | -0.5±0.773   | 5.98E-07 |
| cg08465774 | 8  | 39771756  | IDO1      | 0.821±0.449  | 0.257±0.688  | 5.99E-07 |
| cg14396117 | 13 | 109248047 | MYO16     | -0.836±0.237 | -0.294±0.732 | 6.00E-07 |
| cg02955504 | 18 | 77749374  | TXNL4A    | 1.616±0.385  | 0.98±0.83    | 6.00E-07 |
| cg21512370 | 13 | 48990327  | LPAR6     | 0.833±0.164  | 0.648±0.217  | 6.06E-07 |
| cg24167037 | 21 | 46340776  | ITGB2-AS1 | -0.527±0.323 | 0.088±0.818  | 6.09E-07 |
| cg08211091 | 4  | 2061923   | NAT8L     | -3.358±0.32  | -2.327±1.415 | 6.11E-07 |
| cg06585893 | 1  | 230883552 | CAPN9     | 0.93±0.418   | 1.5±0.717    | 6.13E-07 |
| cg11809085 | 9  | 117567756 | TNFSF15   | 0.464±0.255  | -0.034±0.658 | 6.18E-07 |
| cg15210999 | 6  | 15663538  | DTNBP1    | 0.932±0.279  | 1.33±0.505   | 6.25E-07 |
| cg23722792 | 17 | 62050468  | SCN4A     | 4.111±0.287  | 3.733±0.469  | 6.25E-07 |
| cg26556719 | 5  | 140261810 | PCDHA13   | -2.393±0.386 | -1.602±1.062 | 6.36E-07 |
| cg25852472 | 11 | 2017664   | H19       | 0.725±0.186  | 0.331±0.53   | 6.40E-07 |
| cg15109207 | 19 | 48614773  | PLA2G4C   | 0.792±0.315  | 0.251±0.711  | 6.40E-07 |
| cg18156583 | 2  | 103035227 | IL18RAP   | 0.194±0.34   | -0.419±0.804 | 6.43E-07 |
| cg20095587 | 6  | 41130718  | TREM2     | 2.224±0.238  | 1.883±0.436  | 6.48E-07 |
| cg26853640 | 19 | 38879673  | GGN       | -4.364±0.497 | -3.721±0.797 | 6.51E-07 |
| cg00308665 | 13 | 47469654  | HTR2A     | -0.374±0.268 | 0.016±0.498  | 6.52E-07 |
| cg17777592 | 13 | 49975418  | CAB39L    | -0.525±0.29  | -0.993±0.605 | 6.54E-07 |
| cg25177452 | 5  | 72416677  | TMEM171   | -4.041±0.547 | -3.353±0.845 | 6.54E-07 |
| cg04567009 | 1  | 161600769 | FCGR3B    | 2.134±0.383  | 1.456±0.897  | 6.57E-07 |
| cg10143146 | 6  | 33161377  | COL11A2   | -2.651±0.892 | -1.697±1.089 | 6.65E-07 |
| cg23090046 | 14 | 104094619 | KLC1      | -1.222±0.417 | -0.672±0.687 | 6.68E-07 |
| cg18236734 | 3  | 183817931 | HTR3E     | -0.592±0.255 | -0.018±0.778 | 6.73E-07 |
| cg05208153 | 9  | 34398637  | C9orf24   | 1.861±0.275  | 2.216±0.439  | 6.73E-07 |
| cg24461814 | 12 | 52779281  | KRT84     | 2.673±0.232  | 2.36±0.394   | 6.77E-07 |
| cg04958703 | 17 | 4844722   | RNF167    | -2.762±0.331 | -3.163±0.488 | 6.77E-07 |
| cg12069042 | 3  | 48466700  | PLXNB1    | 0.647±0.247  | 1.06±0.544   | 6.81E-07 |
| cg25306170 | 13 | 37680502  | CSNK1A1L  | 2.842±0.192  | 2.465±0.506  | 6.85E-07 |
| cg15585987 | 8  | 50824749  | SNTG1     | 0.309±0.302  | -0.297±0.814 | 6.85E-07 |
| cg05656180 | 11 | 2890258   | KCNQ1DN   | -0.699±0.283 | -0.186±0.681 | 6.93E-07 |
| cg02105856 | 1  | 207119784 | PIGR      | -0.779±0.264 | -1.276±0.664 | 6.93E-07 |
| cg14893129 | 17 | 78152051  | CARD14    | 2.962±0.191  | 2.526±0.591  | 6.93E-07 |
| cg22428102 | 4  | 184020710 | WWC2      | -5.17±0.651  | -4.445±0.849 | 6.96E-07 |
| cg11037787 | 1  | 20307002  | PLA2G2A   | 0.212±0.241  | -0.302±0.695 | 6.98E-07 |
| cg14528319 | 19 | 14607713  | GIPC1     | 0.726±0.32   | 1.362±0.855  | 7.00E-07 |
| cg00756058 | 13 | 96296844  | DZIP1     | -5.714±0.612 | -4.489±1.648 | 7.05E-07 |
| cg04879235 | 17 | 42018862  | PPY       | 2.466±0.331  | 2.043±0.524  | 7.05E-07 |
| cg14370448 | 16 | 30103978  | TBX6      | -3.19±0.374  | -3.69±0.628  | 7.09E-07 |
| cg03312792 | 20 | 43849759  | SEMG2     | 2.83±0.24    | 2.392±0.584  | 7.09E-07 |
| cg25425005 | 16 | 202905    | HBZ       | 2.946±0.293  | 2.559±0.485  | 7.10E-07 |
| cg11414151 | 4  | 185747826 | ACSL1     | -3.181±0.397 | -3.644±0.555 | 7.10E-07 |
| cg00412805 | 3  | 42726970  | KLHL40    | 3.187±0.42   | 3.676±0.587  | 7.12E-07 |
| cg13145013 | 11 | 2018205   | MIR675    | 2.587±0.307  | 2.077±0.671  | 7.13E-07 |
| cg22467071 | 0  | 0         | 0         | -0.411±0.315 | 0.016±0.538  | 7.13E-07 |
| cg02431687 | 9  | 130828652 | NAIF1     | 3.394±0.337  | 2.851±0.711  | 7.13E-07 |
| cg05619712 | 2  | 208994720 | CRYGC     | 0.981±0.372  | 1.335±0.371  | 7.14E-07 |
| cg21644826 | 16 | 20775352  | ACSM3     | -3.435±0.386 | -3.826±0.433 | 7.14E-07 |
| cg03717979 | 4  | 4862184   | MSX1      | -4.761±0.408 | -3.777±1.343 | 7.16E-07 |
| cg09494188 | 11 | 62186529  | SCGB1A1   | 2.506±0.308  | 2.168±0.395  | 7.16E-07 |
| cg09990086 | 8  | 38643846  | TACC1     | 2.482±0.21   | 2.718±0.279  | 7.24E-07 |
| cg06575572 | 22 | 45705265  | FAM118A   | -1.078±0.32  | -1.654±0.766 | 7.26E-07 |
| cg08833432 | 20 | 60719824  | SS18L1    | -1.54±0.313  | -1.06±0.624  | 7.28E-07 |
| cg10063179 | 4  | 187476326 | MTNR1A    | -2.841±0.364 | -2.399±0.54  | 7.28E-07 |
| cg23337754 | 15 | 78632859  | CRABP1    | -4.623±0.494 | -3.798±1.087 | 7.29E-07 |
| cg12150401 | 7  | 122635522 | TAS2R16   | 2.151±0.33   | 1.707±0.561  | 7.30E-07 |
| cg12535715 | 8  | 38831693  | HTRA4     | 0.278±0.31   | 1.016±1.007  | 7.31E-07 |
| cg04878727 | 6  | 28317483  | ZKSCAN3   | -3.857±0.375 | -3.079±1.052 | 7.34E-07 |
| cg08186362 | 20 | 60794868  | HRH3      | -3.816±0.577 | -2.515±1.77  | 7.37E-07 |
| cg03504701 | 5  | 19980857  | CDH18     | 2.355±0.167  | 1.894±0.634  | 7.37E-07 |
| cg14159672 | 1  | 205819179 | PM20D1    | -3.087±0.761 | -1.878±1.583 | 7.43E-07 |
| cg14615807 | 1  | 55464173  | BSND      | 1.886±0.24   | 1.425±0.619  | 7.43E-07 |
| cg11783497 | 2  | 113875292 | IL1RN     | 1.241±0.321  | 0.675±0.753  | 7.46E-07 |
| cg23192899 | 2  | 55746287  | CCDC104   | -3.879±0.518 | -4.52±0.789  | 7.46E-07 |
| cg17188046 | 6  | 166582197 | T         | -3.747±0.341 | -3.007±1.006 | 7.59E-07 |
| cg21672276 | 3  | 44754072  | ZNF502    | -3.438±0.338 | -2.892±0.719 | 7.63E-07 |
| cg22222251 | 7  | 44039076  | SPDYE1    | 1.048±0.25   | 0.768±0.332  | 7.70E-07 |
| cg14311811 | 18 | 29077863  | DSG2      | -4.4±0.481   | -3.82±0.709  | 7.71E-07 |

|            |    |           |           |              |              |          |
|------------|----|-----------|-----------|--------------|--------------|----------|
| cg01775414 | 22 | 45405404  | PHF21B    | -4.128±0.488 | -3.175±1.284 | 7.74E-07 |
| cg20011134 | 6  | 110736422 | DDO       | 0.257±0.24   | 0.726±0.633  | 7.75E-07 |
| cg09299388 | 6  | 49755190  | PGK2      | 1.646±0.199  | 1.027±0.857  | 7.80E-07 |
| cg01739167 | 17 | 4806344   | CHRNA     | -0.062±0.247 | -0.429±0.475 | 7.80E-07 |
| cg00973677 | 7  | 136553595 | CHRNA     | -5.478±0.45  | -4.648±1.112 | 7.91E-07 |
| cg26896762 | 5  | 50679361  | LOC642366 | -2.93±0.323  | -2.137±1.089 | 7.92E-07 |
| cg19832721 | 17 | 44249866  | KANSL1    | 0.87±0.292   | 1.276±0.514  | 7.94E-07 |
| cg27501458 | 22 | 44258690  | SULT4A1   | -3.063±0.505 | -2.284±1.018 | 7.95E-07 |
| cg26369642 | 8  | 58987333  | FAM110B   | 2.617±0.187  | 2.152±0.638  | 7.96E-07 |
| cg11226328 | 1  | 29213367  | EPB41     | -4.399±0.486 | -4.82±0.395  | 7.97E-07 |
| cg17260124 | 11 | 77734744  | KCTD14    | 3.46±0.293   | 2.934±0.703  | 8.04E-07 |
| cg27626424 | 1  | 153232348 | LOR       | 3.301±0.327  | 2.648±0.883  | 8.06E-07 |
| cg03969797 | 15 | 23810664  | MKRN3     | 0.799±0.443  | 0.091±0.932  | 8.07E-07 |
| cg04484789 | 17 | 38928324  | KRT26     | 2.491±0.214  | 2.096±0.53   | 8.08E-07 |
| cg18151487 | 10 | 104475340 | SFXN2     | -0.835±0.281 | -0.45±0.491  | 8.08E-07 |
| cg12315997 | 4  | 39461668  | LIAS      | -2.855±0.401 | -3.272±0.473 | 8.09E-07 |
| cg15091410 | 5  | 55149500  | IL31RA    | -0.589±0.357 | -0.153±0.499 | 8.12E-07 |
| cg18838701 | 19 | 55668612  | TNNI3     | -2.195±0.632 | -1.432±0.936 | 8.12E-07 |
| cg13823791 | 17 | 17184990  | COP3      | -2.485±0.409 | -3.034±0.696 | 8.12E-07 |
| cg04030848 | 22 | 30960881  | GAL3ST1   | 0.086±0.193  | 0.498±0.561  | 8.14E-07 |
| cg07800320 | 3  | 125899567 | ALDH1L1   | -4.223±0.449 | -3.657±0.705 | 8.22E-07 |
| cg14256699 | 17 | 41836026  | SOST      | 3.734±0.381  | 2.9±1.139    | 8.31E-07 |
| cg01226811 | 12 | 21927612  | KCNJ8     | -3.378±0.293 | -2.541±1.159 | 8.31E-07 |
| cg06110728 | 12 | 45270886  | NELL2     | -4.262±0.485 | -3.415±1.131 | 8.35E-07 |
| cg07763768 | 9  | 125877923 | MIR600HG  | 1.415±0.328  | 1.808±0.48   | 8.36E-07 |
| cg21478437 | 1  | 206317403 | CTSE      | 0.991±0.299  | 0.281±0.975  | 8.36E-07 |
| cg26054540 | 5  | 1009204   | NKD2      | -6.352±1.031 | -4.909±1.853 | 8.39E-07 |
| cg00779924 | 10 | 8094641   | GATA3-AS1 | -2.88±0.39   | -2.152±0.98  | 8.41E-07 |
| cg00958560 | 4  | 5990039   | 0         | 1.292±0.197  | 0.78±0.707   | 8.44E-07 |
| cg21530453 | 16 | 56226346  | GNAO1     | -4.465±0.389 | -3.741±0.976 | 8.47E-07 |
| cg13297249 | 2  | 242945663 | 0         | 2.216±0.383  | 1.655±0.728  | 8.47E-07 |
| cg27601582 | 19 | 3933195   | NMRK2     | -4.27±0.575  | -3.294±1.299 | 8.56E-07 |
| cg05607401 | 19 | 39826693  | GMFG      | -1.2±0.298   | -0.591±0.829 | 8.62E-07 |
| cg27609819 | 2  | 198816177 | PLCL1     | 2.092±0.37   | 1.433±0.883  | 8.62E-07 |
| cg04270025 | 5  | 140579567 | PCDHB11   | -2.734±0.534 | -3.267±0.591 | 8.65E-07 |
| cg08786003 | 1  | 157670710 | FCRL3     | 0.814±0.289  | -0.005±1.136 | 8.66E-07 |
| cg05840553 | 9  | 130212635 | RPL12     | -4.907±0.418 | -4.069±1.139 | 8.69E-07 |
| cg14059963 | 12 | 12815026  | GPR19     | 3.375±0.21   | 3.135±0.288  | 8.73E-07 |
| cg01708964 | 7  | 44181791  | MYL7      | 3.854±0.366  | 3.138±0.97   | 8.73E-07 |
| cg26904406 | 6  | 111927312 | TRAF3IP2  | -3.998±0.354 | -4.426±0.526 | 8.75E-07 |
| cg25842356 | 5  | 126367370 | 42432     | 0.757±0.206  | 1.166±0.555  | 8.76E-07 |
| cg24975222 | 3  | 45187717  | CDCP1     | -4.375±0.609 | -3.618±0.943 | 8.78E-07 |
| cg24691255 | 18 | 61553966  | SERPINB2  | 2.799±0.32   | 2.075±0.993  | 8.78E-07 |
| cg06308323 | 9  | 34459568  | DNAI1     | 2.423±0.352  | 1.999±0.521  | 8.89E-07 |
| cg16537367 | 20 | 16729319  | OTOR      | 0.566±0.267  | 0.962±0.515  | 8.93E-07 |
| cg14535518 | 19 | 35782015  | MAG       | 0.427±0.166  | 0.165±0.345  | 8.97E-07 |
| cg20670302 | 18 | 43652172  | PSTPIP2   | -5.823±1.017 | -4.724±1.287 | 8.97E-07 |
| cg17740399 | 13 | 28494177  | PDX1      | -3.858±0.86  | -2.633±1.586 | 8.99E-07 |
| cg17964955 | 10 | 48390936  | RBP3      | 1.413±0.277  | 0.839±0.783  | 9.02E-07 |
| cg02318535 | 17 | 56832804  | PPM1E     | 1.322±0.462  | 1.874±0.678  | 9.04E-07 |
| cg02058918 | 9  | 101470884 | GABBR2    | -3.562±0.557 | -2.748±1.061 | 9.06E-07 |
| cg23126915 | 7  | 152374317 | XRCC2     | 1.177±0.322  | 0.459±0.987  | 9.10E-07 |
| cg08946332 | 17 | 6899888   | ALOX12    | 2.133±0.353  | 2.681±0.723  | 9.13E-07 |
| cg27318281 | 18 | 33078719  | INO80C    | 2.49±0.185   | 2.014±0.659  | 9.14E-07 |
| cg27635271 | 15 | 75941576  | SNX33     | -0.696±0.393 | -0.168±0.674 | 9.20E-07 |
| cg17918501 | 2  | 27717709  | FNDC4     | -4.21±0.68   | -3.42±0.96   | 9.20E-07 |
| cg19795898 | 9  | 139693196 | KIAA1984  | 0.64±0.242   | 0.187±0.613  | 9.21E-07 |
| cg08343834 | 17 | 15168658  | PMP22     | -0.274±0.236 | -0.709±0.587 | 9.26E-07 |
| cg05902852 | 7  | 79082393  | MAGI2-AS3 | -4.044±0.581 | -3.343±0.865 | 9.33E-07 |
| cg18630040 | 6  | 46702983  | PLA2G7    | -4.395±0.855 | -3.039±1.795 | 9.38E-07 |
| cg02616808 | 5  | 176236654 | UNC5A     | -4.367±0.483 | -3.645±0.947 | 9.41E-07 |
| cg01889448 | 6  | 32635871  | HLA-DQB1  | 0.732±0.281  | 0.194±0.697  | 9.53E-07 |
| cg27470554 | 1  | 161475240 | FCGR2A    | -0.581±0.372 | 0.09±0.905   | 9.55E-07 |
| cg23629496 | 20 | 6034446   | LRRN4     | 0.341±0.754  | -0.355±0.723 | 9.63E-07 |
| cg21342728 | 22 | 41075673  | MCHR1     | -0.814±0.326 | -0.095±0.989 | 9.67E-07 |
| cg15271616 | 9  | 35490515  | RUSC2     | -2.734±0.647 | -1.88±1.089  | 9.74E-07 |
| cg27108154 | 4  | 96761377  | PDHA2     | 4.032±0.352  | 3.478±0.734  | 9.77E-07 |
| cg12067261 | 9  | 5231539   | INSL4     | 2.795±0.25   | 2.315±0.653  | 9.78E-07 |
| cg17142149 | 6  | 46293016  | RCAN2     | 3.109±0.242  | 2.799±0.393  | 9.82E-07 |
| cg26053864 | 15 | 35087635  | ACTC1     | -3.538±0.395 | -2.543±1.382 | 9.88E-07 |

|            |    |           |            |              |              |          |
|------------|----|-----------|------------|--------------|--------------|----------|
| cg10451565 | 19 | 47840131  | C5AR2      | -0.416±0.32  | -0.768±0.419 | 9.88E-07 |
| cg01464985 | 2  | 27805622  | ZNF512     | -2.675±0.284 | -2.205±0.628 | 9.89E-07 |
| cg00930873 | 15 | 58357973  | ALDH1A2    | -3.235±0.444 | -2.404±1.129 | 9.90E-07 |
| cg09893305 | 5  | 83017184  | HAPLN1     | 0.727±0.251  | 1.173±0.602  | 9.91E-07 |
| cg11360149 | 5  | 180581315 | OR2V2      | 4.305±0.303  | 3.484±1.143  | 9.91E-07 |
| cg24421410 | 6  | 32920220  | HLA-DMA    | -1.227±0.326 | -1.863±0.867 | 9.92E-07 |
| cg06747888 | 2  | 162271859 | TBR1       | -2.604±0.379 | -3.032±0.516 | 9.94E-07 |
| cg23695504 | 1  | 247275344 | C1orf229   | -2.774±0.942 | -1.823±1.073 | 9.99E-07 |
| cg06859828 | 1  | 6526718   | TNFRSF25   | 2.907±0.351  | 2.569±0.367  | 1.01E-06 |
| cg22100821 | 20 | 656743    | SCRT2      | -3.938±0.527 | -3.211±0.939 | 1.01E-06 |
| cg06665322 | 1  | 167059365 | GPA33      | 1.963±0.443  | 1.285±0.895  | 1.01E-06 |
| cg02533173 | 19 | 15391124  | BRD4       | -1.281±0.288 | -0.891±0.502 | 1.01E-06 |
| cg10989326 | 1  | 93258908  | EVI5       | 1.312±0.252  | 0.943±0.484  | 1.01E-06 |
| cg16571399 | 15 | 62939540  | TLN2       | 3.737±0.252  | 3.189±0.754  | 1.02E-06 |
| cg07537523 | 12 | 25102311  | BCAT1      | -4.348±0.514 | -3.594±0.988 | 1.02E-06 |
| cg17773950 | 11 | 2161598   | IGF2-AS    | -4.227±0.501 | -3.547±0.876 | 1.02E-06 |
| cg14679230 | 19 | 42931679  | LIPE       | 0.798±0.247  | 1.134±0.432  | 1.02E-06 |
| cg02735486 | 4  | 113970935 | ANK2       | -1.143±0.324 | -0.551±0.803 | 1.03E-06 |
| cg23698969 | 11 | 2931165   | SLC22A18   | 3.621±0.27   | 3.861±0.239  | 1.03E-06 |
| cg07404485 | 7  | 94953653  | PON1       | 0.164±0.442  | 0.77±0.784   | 1.03E-06 |
| cg06233503 | 11 | 2812674   | KCNQ1      | -2.239±0.344 | -2.631±0.477 | 1.04E-06 |
| cg25527547 | 7  | 100862300 | PLOD3      | 1.85±0.304   | 1.336±0.691  | 1.04E-06 |
| cg05964373 | 15 | 56657478  | TEX9       | -4.441±0.403 | -4.853±0.471 | 1.05E-06 |
| cg17808849 | 16 | 56965376  | HERPUD1    | -4.689±0.509 | -4.068±0.774 | 1.05E-06 |
| cg27038439 | 4  | 4864320   | MSX1       | 2.191±0.294  | 2.731±0.734  | 1.05E-06 |
| cg14717170 | 3  | 164914471 | SLITRK3    | -3.078±0.329 | -2.441±0.871 | 1.05E-06 |
| cg06377278 | 1  | 25256369  | RUNX3      | -5.293±0.801 | -3.533±2.431 | 1.06E-06 |
| cg26389232 | 15 | 25296693  | SNORD116-1 | 3.112±0.346  | 2.478±0.861  | 1.06E-06 |
| cg15001372 | 7  | 44229892  | GCK        | 1.338±0.223  | 0.782±0.774  | 1.06E-06 |
| cg07485777 | 4  | 165952835 | TRIM60     | 3.325±0.275  | 2.981±0.435  | 1.06E-06 |
| cg15002204 | 6  | 49429719  | MUT        | -2.686±0.406 | -1.999±0.925 | 1.07E-06 |
| cg24454143 | 13 | 28675265  | FLT3       | -2.167±0.322 | -1.703±0.607 | 1.07E-06 |
| cg18854666 | 2  | 219247055 | SLC11A1    | 1.923±0.408  | 1.388±0.684  | 1.07E-06 |
| cg15974062 | 12 | 6833012   | COPS7A     | -4.34±0.353  | -4.722±0.453 | 1.07E-06 |
| cg26516759 | 20 | 55840973  | BMP7       | -3.905±0.566 | -3.003±1.203 | 1.07E-06 |
| cg09034896 | 13 | 114321466 | GRK1       | 0.496±0.221  | 0.898±0.547  | 1.08E-06 |
| cg13633560 | 11 | 76380921  | LRRC32     | -2.154±0.246 | -1.662±0.675 | 1.08E-06 |
| cg13216057 | 11 | 12030643  | DKK3       | -4.359±0.61  | -3.596±0.962 | 1.08E-06 |
| cg15840658 | 9  | 72287152  | APBA1      | -4.606±0.698 | -3.814±0.962 | 1.08E-06 |
| cg16427670 | 13 | 111766902 | ARHGEF7    | -3.777±0.349 | -3.283±0.644 | 1.08E-06 |
| cg15518883 | 9  | 35650561  | SIT1       | 1.935±0.376  | 1.384±0.724  | 1.09E-06 |
| cg21968580 | 1  | 78470640  | DNAJB4     | -3.546±0.544 | -2.547±1.361 | 1.09E-06 |
| cg11979312 | 3  | 172242713 | TNFSF10    | 1.86±0.233   | 1.26±0.838   | 1.09E-06 |
| cg14799446 | 19 | 47250607  | STRN4      | 0.021±0.227  | 0.444±0.578  | 1.10E-06 |
| cg11747771 | 9  | 6645468   | GLDC       | -4.597±0.443 | -3.617±1.358 | 1.11E-06 |
| cg25168545 | 7  | 150413893 | GIMAP1     | -0.938±0.266 | -1.527±0.816 | 1.11E-06 |
| cg27397287 | 19 | 14492495  | CD97       | -3.799±0.291 | -3.292±0.687 | 1.11E-06 |
| cg14837082 | 3  | 11294604  | HRH1       | 1.355±0.349  | 0.996±0.414  | 1.12E-06 |
| cg08528984 | 1  | 2985218   | PRDM16     | -4.363±0.861 | -3.461±1.051 | 1.12E-06 |
| cg25668368 | 2  | 163695882 | KCNH7      | -3.374±0.36  | -2.586±1.092 | 1.12E-06 |
| cg16358826 | 4  | 46996264  | GABRA4     | -2.844±0.207 | -2.42±0.584  | 1.13E-06 |
| cg16854606 | 19 | 13080743  | DAND5      | 0.927±0.232  | 0.415±0.71   | 1.13E-06 |
| cg04632683 | 19 | 54620122  | TFPT       | 1.805±0.362  | 2.224±0.515  | 1.13E-06 |
| cg15942562 | 12 | 6959471   | CDCA3      | 2.912±0.296  | 3.211±0.342  | 1.15E-06 |
| cg01958916 | 1  | 151119525 | SEMA6C     | -5.227±0.354 | -4.692±0.71  | 1.15E-06 |
| cg00757952 | 22 | 27014415  | CRYBB1     | 1.415±0.261  | 0.904±0.702  | 1.15E-06 |
| cg26233253 | 22 | 31032613  | SLC35E4    | 0.451±0.215  | 0.056±0.539  | 1.15E-06 |
| cg04757093 | 1  | 25229192  | RUNX3      | 0.922±0.185  | 1.223±0.404  | 1.16E-06 |
| cg06730286 | 16 | 1657372   | IFT140     | 1.974±0.415  | 2.437±0.553  | 1.17E-06 |
| cg07499072 | 5  | 52776694  | FST        | -3.434±0.323 | -2.762±0.929 | 1.17E-06 |
| cg02497758 | 20 | 39317194  | MAFB       | -2.374±0.574 | -1.543±1.094 | 1.18E-06 |
| cg25133753 | 20 | 44299726  | WFDC11     | 0.246±0.287  | -0.366±0.849 | 1.18E-06 |
| cg21012874 | 10 | 88718393  | SNCG       | -0.279±0.398 | 0.335±0.819  | 1.19E-06 |
| cg10242476 | 3  | 46619364  | TDGF1      | -0.095±0.278 | 0.363±0.618  | 1.20E-06 |
| cg21674595 | 12 | 48877384  | C12orf54   | 0.292±0.3    | -0.23±0.686  | 1.20E-06 |
| cg13765785 | 11 | 123524938 | SCN3B      | -2.534±0.235 | -1.904±0.885 | 1.21E-06 |
| cg26756862 | 7  | 143012960 | CLCN1      | 2.451±0.183  | 2.037±0.578  | 1.21E-06 |
| cg08244522 | 20 | 23030533  | THBD       | -5.015±0.402 | -4.389±0.836 | 1.21E-06 |
| cg00911873 | 7  | 18067463  | PRPS1L1    | 2.039±0.408  | 2.448±0.467  | 1.21E-06 |
| cg09869858 | 12 | 48120416  | ENDOU      | 3.253±0.176  | 3.013±0.312  | 1.22E-06 |

|            |    |           |              |              |              |          |
|------------|----|-----------|--------------|--------------|--------------|----------|
| cg11695684 | 2  | 233391265 | CHRND        | 0.721±0.316  | 1.259±0.729  | 1.22E-06 |
| cg23326197 | 7  | 99382370  | CYP3A4       | 0.757±0.327  | 0.138±0.85   | 1.22E-06 |
| cg22013966 | 14 | 95106170  | SERPINA13P   | 1.569±0.315  | 0.927±0.888  | 1.23E-06 |
| cg08424423 | 6  | 31088188  | CDSN         | 3.517±0.378  | 2.892±0.845  | 1.23E-06 |
| cg21690892 | 6  | 42162428  | GUCA1B       | 4.034±0.235  | 3.626±0.555  | 1.23E-06 |
| cg21051086 | 3  | 73046214  | PPP4R2       | -1.395±0.237 | -1.142±0.3   | 1.23E-06 |
| cg24884084 | 1  | 153003198 | SPRR1B       | -0.854±0.203 | -1.441±0.828 | 1.23E-06 |
| cg08849574 | 19 | 58125953  | ZNF134       | -3.116±0.356 | -2.341±1.078 | 1.24E-06 |
| cg15544721 | 7  | 94536691  | PPP1R9A      | 1.241±0.239  | 0.778±0.639  | 1.25E-06 |
| cg25332298 | 19 | 11592958  | ELAVL3       | -3.896±0.34  | -3.086±1.133 | 1.25E-06 |
| cg07501965 | 15 | 30685190  | CHRFAM7A     | -3.259±0.238 | -2.73±0.737  | 1.25E-06 |
| cg07640473 | 3  | 50193232  | SEMA3F       | -3.54±0.502  | -2.645±1.222 | 1.26E-06 |
| cg02397514 | 1  | 935139    | HES4         | -5.101±0.677 | -4.316±0.972 | 1.26E-06 |
| cg19462352 | 17 | 27038664  | PROCA1       | -5.233±0.516 | -4.076±1.615 | 1.27E-06 |
| cg16267266 | 6  | 52109232  | IL17F        | 2.49±0.297   | 2.842±0.439  | 1.27E-06 |
| cg05641882 | 4  | 74904583  | CXCL3        | -4.662±0.51  | -4.136±0.613 | 1.27E-06 |
| cg25092283 | 10 | 97321585  | SORBS1       | -1.506±0.318 | -1.928±0.546 | 1.27E-06 |
| cg18942631 | 1  | 116311341 | CASQ2        | -0.17±0.257  | 0.232±0.54   | 1.27E-06 |
| cg18020749 | 17 | 44372704  | LRRC37A      | 3.757±0.36   | 3.314±0.561  | 1.27E-06 |
| cg19357849 | 19 | 8071093   | ELAVL1       | -3.327±0.274 | -3.672±0.44  | 1.28E-06 |
| cg13097407 | 6  | 43276658  | CRIP3        | -3.667±0.397 | -4.167±0.638 | 1.28E-06 |
| cg15396367 | 9  | 139972779 | UAP1L1       | -1.435±0.292 | -0.721±1.003 | 1.28E-06 |
| cg13473383 | 11 | 57434378  | ZDHC5        | -3.251±0.239 | -3.556±0.392 | 1.28E-06 |
| cg15127324 | 4  | 36246442  | ARAP2        | -3.347±0.286 | -3.655±0.369 | 1.29E-06 |
| cg23577242 | 11 | 30603015  | MPPED2       | 3.1±0.295    | 2.432±0.933  | 1.29E-06 |
| cg11314684 | 1  | 244006288 | AKT3         | -1.025±0.304 | -1.687±0.923 | 1.30E-06 |
| cg01366419 | 7  | 70597091  | WBSCR17      | -2.506±0.506 | -1.895±0.771 | 1.30E-06 |
| cg12506971 | 4  | 171011264 | AADAT        | -3.795±0.598 | -3.112±0.842 | 1.30E-06 |
| cg21700166 | 14 | 91720227  | GPR68        | -3.119±0.487 | -3.621±0.587 | 1.30E-06 |
| cg16098170 | 19 | 2255848   | JSRP1        | 2.494±0.392  | 2.078±0.494  | 1.30E-06 |
| cg04070847 | 3  | 112693867 | CD200R1      | -1.579±0.318 | -0.938±0.888 | 1.31E-06 |
| cg04686412 | 5  | 139175658 | PSD2         | -2.818±0.398 | -2.344±0.593 | 1.31E-06 |
| cg17638468 | 3  | 112694062 | CD200R1      | -1.912±0.314 | -1.248±0.925 | 1.31E-06 |
| cg03495868 | 1  | 78956905  | PTGFR        | -3.677±0.336 | -3.163±0.688 | 1.31E-06 |
| cg22441882 | 8  | 20040654  | SLC18A1      | -1.481±0.277 | -0.972±0.701 | 1.32E-06 |
| cg09440289 | 12 | 15475990  | PTPRO        | -4.085±0.442 | -3.275±1.114 | 1.32E-06 |
| cg01920829 | 2  | 219824761 | CDK5R2       | -1.478±0.272 | -0.895±0.812 | 1.32E-06 |
| cg06641503 | 3  | 48959341  | ARIH2        | 1.4±0.385    | 0.956±0.549  | 1.32E-06 |
| cg20312228 | 3  | 126113707 | LOC100506907 | -2.799±0.438 | -2.193±0.794 | 1.32E-06 |
| cg09174741 | 13 | 52981577  | THSD1        | 2.877±0.525  | 2.411±0.476  | 1.33E-06 |
| cg19370451 | 1  | 152386561 | CRNN         | 2.299±0.422  | 1.652±0.867  | 1.34E-06 |
| cg18705776 | 10 | 5565829   | CALML3       | 1.899±0.32   | 1.482±0.54   | 1.34E-06 |
| cg00687686 | 16 | 58497236  | NDRG4        | -4.7±0.451   | -3.761±1.308 | 1.36E-06 |
| cg07152925 | 21 | 48024683  | S100B        | 0.387±0.33   | -0.033±0.539 | 1.36E-06 |
| cg23833896 | 8  | 1711046   | CLN8         | -3.542±0.603 | -2.921±0.727 | 1.36E-06 |
| cg16097079 | 6  | 31239916  | HLA-C        | -4.204±0.702 | -3.384±1.022 | 1.36E-06 |
| cg11155265 | 1  | 23811445  | ASAP3        | -1.706±0.21  | -1.259±0.624 | 1.38E-06 |
| cg16019620 | 6  | 46761090  | MEP1A        | 0.665±0.345  | 1.235±0.774  | 1.38E-06 |
| cg16799087 | 16 | 90128361  | PRDM7        | 1.849±0.262  | 1.224±0.879  | 1.38E-06 |
| cg26563737 | 16 | 89725269  | SPATA33      | 0.552±0.21   | 0.16±0.542   | 1.38E-06 |
| cg17749443 | 9  | 115819190 | ZFP37        | -3.69±0.694  | -2.473±1.668 | 1.39E-06 |
| cg15321211 | 10 | 43905515  | HNRNPF       | -1.449±0.358 | -1.91±0.595  | 1.39E-06 |
| cg25397076 | 1  | 10057305  | RBP7         | -5.457±0.728 | -4.563±1.137 | 1.39E-06 |
| cg01408558 | 19 | 10563212  | PDE4A        | 1.907±0.134  | 1.713±0.259  | 1.40E-06 |
| cg07253191 | 11 | 34936862  | PDHX         | -1.884±0.36  | -2.326±0.563 | 1.40E-06 |
| cg21517055 | 19 | 14016717  | C19orf57     | -2.744±0.471 | -2.044±0.935 | 1.41E-06 |
| cg06688396 | 8  | 92053433  | TMEM55A      | -2.866±0.283 | -2.319±0.758 | 1.41E-06 |
| cg12091331 | 8  | 42065314  | PLAT         | -0.849±0.347 | -0.07±1.093  | 1.41E-06 |
| cg21209356 | 22 | 37319042  | CSF2RB       | 1.749±0.252  | 2.115±0.487  | 1.42E-06 |
| cg13334990 | 12 | 7023763   | ENO2         | -1.104±0.395 | -0.665±0.537 | 1.42E-06 |
| cg27212977 | 8  | 6783407   | DEFA6        | 2.911±0.265  | 2.44±0.647   | 1.43E-06 |
| cg03762535 | 1  | 119911480 | HAO2         | 0.122±0.335  | -0.352±0.618 | 1.43E-06 |
| cg00400263 | 20 | 58514201  | PPP1R3D      | 5.102±0.493  | 3.918±1.67   | 1.43E-06 |
| cg01637734 | 1  | 157811303 | CD5L         | 1.82±0.264   | 1.007±1.148  | 1.44E-06 |
| cg23699324 | 2  | 79740308  | CTNNA2       | -3.317±0.431 | -2.745±0.747 | 1.45E-06 |
| cg10237469 | 19 | 42133409  | CEACAM4      | -1.268±0.315 | -1.595±0.385 | 1.45E-06 |
| cg10832166 | 15 | 25296628  | SNORD116-1   | 1.939±0.349  | 1.401±0.725  | 1.45E-06 |
| cg26524263 | 19 | 51568336  | KLK13        | -4.217±0.513 | -3.52±0.915  | 1.46E-06 |
| cg16967583 | 2  | 241807859 | AGXT         | -0.333±0.264 | -0.795±0.635 | 1.46E-06 |
| cg05822532 | 7  | 73442531  | ELN          | -2.26±0.598  | -1.498±0.984 | 1.47E-06 |







|            |    |           |           |              |              |          |
|------------|----|-----------|-----------|--------------|--------------|----------|
| cg04536575 | 14 | 65016802  | PPP1R36   | -2.809±0.241 | -2.16±0.952  | 2.91E-06 |
| cg02001410 | 5  | 71403045  | MAP1B     | -3.692±0.411 | -2.98±1.012  | 2.91E-06 |
| cg21623671 | 5  | 150536851 | ANXA6     | -4.204±0.437 | -3.263±1.366 | 2.92E-06 |
| cg17397493 | 5  | 35231272  | PRLR      | 0.882±0.231  | 0.258±0.917  | 2.94E-06 |
| cg09447105 | 12 | 15126020  | PDE6H     | 2.963±0.242  | 2.708±0.319  | 2.95E-06 |
| cg01804429 | 4  | 69216077  | YTHDC1    | -0.78±0.248  | -1.181±0.566 | 2.97E-06 |
| cg10190509 | 17 | 34308137  | CCL16     | 1.901±0.326  | 1.354±0.775  | 2.98E-06 |
| cg27519373 | 19 | 57350292  | PEG3      | 0.901±0.238  | 0.418±0.698  | 2.99E-06 |
| cg17016000 | 20 | 19869644  | RIN2      | -0.566±0.398 | 0.077±0.907  | 2.99E-06 |
| cg05532892 | 11 | 14666436  | PDE3B     | -4.893±0.369 | -4.23±0.948  | 3.00E-06 |
| cg12732155 | 1  | 31230601  | LAPTM5    | -0.549±0.341 | 0.168±1.039  | 3.01E-06 |
| cg07125166 | 3  | 48413613  | FBXW12    | 2.187±0.253  | 1.768±0.593  | 3.03E-06 |
| cg17083925 | 20 | 36793373  | TGM2      | -1.098±0.241 | -0.638±0.663 | 3.04E-06 |
| cg18552413 | 1  | 159174610 | DARC      | -0.466±0.166 | -1.034±0.842 | 3.06E-06 |
| cg15195276 | 9  | 11379936  | LPAR1     | -4.632±0.513 | -4.081±0.697 | 3.07E-06 |
| cg02609880 | 1  | 156611087 | BCAN      | -1.183±0.226 | -0.773±0.588 | 3.07E-06 |
| cg07434382 | 16 | 69984372  | CLEC18A   | 1.256±0.135  | 0.923±0.488  | 3.08E-06 |
| cg24358465 | 6  | 27100860  | HIST1H2AG | -5.099±0.589 | -3.34±2.599  | 3.08E-06 |
| cg04520391 | 12 | 11507917  | PRB1      | 1.775±0.231  | 1.249±0.768  | 3.10E-06 |
| cg18982568 | 12 | 53097169  | KRT77     | 1.618±0.332  | 1.051±0.808  | 3.11E-06 |
| cg00233307 | 19 | 39109076  | MAP4K1    | -2.303±0.548 | -1.219±1.568 | 3.14E-06 |
| cg20118424 | 2  | 169887275 | ABCB11    | 1.689±0.397  | 2.13±0.568   | 3.15E-06 |
| cg01692815 | 5  | 77591420  | AP3B1     | -4.699±0.577 | -5.281±0.712 | 3.15E-06 |
| cg25631352 | 2  | 70995527  | ADD2      | -2.093±0.412 | -1.527±0.778 | 3.17E-06 |
| cg16778148 | 11 | 2817922   | KCNQ1     | 3.483±0.365  | 3.144±0.393  | 3.17E-06 |
| cg13984181 | 1  | 92495720  | EPHX4     | -3.621±0.399 | -2.93±0.987  | 3.17E-06 |
| cg01316071 | 14 | 95876996  | LINC00341 | 2.682±0.352  | 2.086±0.85   | 3.18E-06 |
| cg15756091 | 1  | 182419655 | RGSL1     | 2.126±0.208  | 1.635±0.718  | 3.18E-06 |
| cg23460697 | 16 | 4902898   | UBN1      | 1.45±0.279   | 1.722±0.327  | 3.18E-06 |
| cg06692957 | 9  | 80647629  | GNAQ      | -4.194±0.5   | -3.757±0.475 | 3.19E-06 |
| cg03400060 | 5  | 78365801  | BHMT2     | -0.522±0.307 | 0.029±0.79   | 3.20E-06 |
| cg24674703 | 11 | 60869960  | CD5       | 1.899±0.377  | 1.321±0.811  | 3.20E-06 |
| cg21604803 | 19 | 50194662  | CPT1C     | -4.511±0.533 | -3.812±0.951 | 3.20E-06 |
| cg26299767 | 20 | 30062987  | REM1      | -3.405±0.384 | -2.827±0.81  | 3.21E-06 |
| cg16415646 | 7  | 41743001  | INHBA     | 0.514±0.33   | 0.924±0.549  | 3.21E-06 |
| cg17132967 | 19 | 53142304  | ZNF83     | -1.549±0.46  | -0.966±0.786 | 3.22E-06 |
| cg16242770 | 17 | 39471738  | KRTAP17-1 | 3.013±0.388  | 3.423±0.516  | 3.22E-06 |
| cg01897036 | 2  | 120282327 | SCTR      | 3.031±0.415  | 2.246±1.133  | 3.25E-06 |
| cg06222800 | 21 | 32127416  | 0         | 1.904±0.333  | 1.388±0.719  | 3.25E-06 |
| cg14924278 | 10 | 123748922 | TACC2     | 0.102±0.447  | -0.424±0.692 | 3.25E-06 |
| cg13306164 | 1  | 33352184  | HPCA      | -5.219±0.686 | -4.436±1.022 | 3.26E-06 |
| cg18150721 | 3  | 134514881 | EPHB1     | -4.746±0.467 | -4.079±0.927 | 3.27E-06 |
| cg06220208 | 9  | 66555032  | 0         | 1.902±0.441  | 1.459±0.545  | 3.27E-06 |
| cg15559700 | 2  | 234579873 | UGT1A9    | 1.916±0.257  | 2.21±0.382   | 3.28E-06 |
| cg00053647 | 7  | 6866072   | CCZ1B     | -3.311±0.301 | -3.588±0.319 | 3.31E-06 |
| cg13140464 | 15 | 83380023  | AP3B2     | 3.521±0.261  | 3.096±0.604  | 3.31E-06 |
| cg26424956 | 6  | 34101526  | GRM4      | 1.69±0.299   | 1.145±0.785  | 3.31E-06 |
| cg23307338 | 11 | 60260467  | MS4A12    | 1.009±0.333  | 0.368±0.927  | 3.33E-06 |
| cg10148280 | 3  | 148846750 | HP33      | -2.22±0.375  | -1.609±0.868 | 3.33E-06 |
| cg20195812 | 2  | 192015677 | STAT4     | -4.116±0.397 | -4.481±0.421 | 3.33E-06 |
| cg11164400 | 7  | 94536787  | PPP1R9A   | -1.708±0.356 | -2.112±0.528 | 3.33E-06 |
| cg04587829 | 17 | 80692947  | FN3K      | 0.431±0.347  | -0.151±0.83  | 3.35E-06 |
| cg01130192 | 9  | 32385002  | ACO1      | -3.663±0.575 | -3.141±0.596 | 3.35E-06 |
| cg25141674 | 6  | 72130689  | LINC00472 | -2.908±0.595 | -2.235±0.876 | 3.35E-06 |
| cg08872550 | 8  | 86375450  | CA2       | -3.528±0.252 | -3.896±0.515 | 3.36E-06 |
| cg01525376 | 1  | 32716212  | LCK       | -0.935±0.215 | -0.454±0.704 | 3.39E-06 |
| cg08351331 | 20 | 36975083  | LBP       | 1.377±0.268  | 0.944±0.615  | 3.40E-06 |
| cg22593486 | 19 | 15918609  | OR10H1    | 5.638±0.328  | 5.148±0.688  | 3.40E-06 |
| cg25806808 | 4  | 74734924  | CXCL1     | -2.698±0.443 | -2.111±0.804 | 3.41E-06 |
| cg12402251 | 8  | 91094811  | CALB1     | -2.851±0.476 | -2.851±1.157 | 3.42E-06 |
| cg24333473 | 16 | 3493428   | ZNF597    | -1.134±0.336 | -0.575±0.797 | 3.42E-06 |
| cg18277754 | 2  | 30144152  | ALK       | -3.919±0.412 | -3.207±1.021 | 3.42E-06 |
| cg05380982 | 21 | 39288378  | KCNJ6     | -2.611±0.415 | -2.061±0.754 | 3.42E-06 |
| cg16114640 | 13 | 52980000  | THSD1     | -3.795±0.613 | -3.025±1.041 | 3.43E-06 |
| cg15468095 | 16 | 31214401  | PYCARD    | -2.421±0.336 | -1.893±0.747 | 3.44E-06 |
| cg06434470 | 7  | 154429544 | DPP6      | 1.887±0.262  | 1.227±0.965  | 3.44E-06 |
| cg24298280 | 6  | 125305108 | RNF217    | 1.765±0.372  | 1.223±0.757  | 3.45E-06 |
| cg19850370 | 4  | 72205104  | SLC4A4    | 1.432±0.321  | 0.982±0.623  | 3.46E-06 |
| cg25736482 | 19 | 54677232  | TMC4      | -1.204±0.312 | -1.646±0.614 | 3.47E-06 |
| cg26980692 | 11 | 60719947  | SLC15A3   | -2.458±0.442 | -1.863±0.818 | 3.48E-06 |





|            |    |           |            |              |              |          |
|------------|----|-----------|------------|--------------|--------------|----------|
| cg15096123 | 19 | 51413937  | KLK4       | 2.519±0.285  | 1.994±0.773  | 5.08E-06 |
| cg15278682 | 10 | 71175852  | TACR2      | 3.63±0.213   | 3.406±0.289  | 5.09E-06 |
| cg07073964 | 19 | 698371    | 0          | 1.715±0.367  | 1.197±0.736  | 5.10E-06 |
| cg08317263 | 5  | 150603169 | CCDC69     | -4.466±0.456 | -3.637±1.221 | 5.10E-06 |
| cg16005224 | 12 | 101603174 | SLC5A8     | -0.242±0.249 | 0.255±0.739  | 5.11E-06 |
| cg05711886 | 14 | 101292680 | MEG3       | 0.489±0.121  | 0.837±0.528  | 5.12E-06 |
| cg21081971 | 13 | 38444765  | TRPC4      | -0.132±0.21  | 0.25±0.563   | 5.14E-06 |
| cg21660130 | 1  | 16370243  | CLCNKB     | 1.177±0.275  | 0.681±0.73   | 5.14E-06 |
| cg05596294 | 1  | 99729757  | LPPR4      | -2.511±0.412 | -2.026±0.657 | 5.15E-06 |
| cg13801416 | 7  | 134143919 | AKR1B1     | -4.591±0.612 | -3.138±2.184 | 5.16E-06 |
| cg17503456 | 3  | 138666054 | C3orf72    | -3.671±0.507 | -2.939±1.047 | 5.22E-06 |
| cg26198807 | 11 | 46957758  | C11orf49   | 0.411±0.229  | 0.001±0.604  | 5.22E-06 |
| cg19046959 | 1  | 36565856  | COL8A2     | -3.05±0.476  | -3.465±0.474 | 5.24E-06 |
| cg18679190 | 1  | 17308781  | MFAP2      | 3.532±0.227  | 3.191±0.492  | 5.24E-06 |
| cg02654291 | 9  | 86572014  | C9orf64    | -0.547±0.283 | -0.891±0.472 | 5.25E-06 |
| cg07405796 | 6  | 30104552  | TRIM40     | 0.895±0.384  | 0.292±0.874  | 5.27E-06 |
| cg05023691 | 1  | 192605253 | RGS13      | 1.05±0.408   | 1.448±0.492  | 5.27E-06 |
| cg03168582 | 9  | 841850    | DMRT1      | -4.701±0.641 | -3.813±1.26  | 5.29E-06 |
| cg00240880 | 20 | 43343233  | WISP2      | 0.479±0.286  | 0.036±0.641  | 5.29E-06 |
| cg20340596 | 10 | 100206925 | HPS1       | 2.419±0.296  | 1.996±0.604  | 5.32E-06 |
| cg21835643 | 20 | 43935361  | RBPJL      | -1.203±0.373 | -0.519±1.01  | 5.32E-06 |
| cg12331389 | 10 | 95360736  | RBP4       | -3.566±0.797 | -2.683±1.176 | 5.33E-06 |
| cg14249872 | 1  | 233749672 | KCNK1      | -3.264±0.546 | -2.558±0.987 | 5.33E-06 |
| cg15660498 | 19 | 36249933  | C19orf55   | -1.542±0.344 | -1.004±0.781 | 5.38E-06 |
| cg26815021 | 17 | 74733172  | SRSF2      | -2.352±0.285 | -2.113±0.262 | 5.40E-06 |
| cg16606638 | 12 | 89918221  | GALNT4     | -3.786±0.422 | -3.371±0.522 | 5.42E-06 |
| cg09606564 | 17 | 19290353  | MFAP4      | -1.818±0.271 | -1.436±0.545 | 5.43E-06 |
| cg23328404 | 8  | 19539991  | CSGALNACT1 | -1.642±0.286 | -2.008±0.51  | 5.46E-06 |
| cg06595693 | 15 | 40649989  | DISP2      | -1.726±0.38  | -1.292±0.585 | 5.46E-06 |
| cg24438217 | 4  | 39980114  | PDS5A      | -1.334±0.343 | -0.951±0.502 | 5.47E-06 |
| cg22289115 | 11 | 625796    | CDHR5      | 2.553±0.45   | 3.114±0.778  | 5.47E-06 |
| cg23727043 | 15 | 79104124  | ADAMTS7    | -3.288±0.379 | -2.839±0.615 | 5.50E-06 |
| cg09068528 | 2  | 211090171 | ACADL      | -3.992±0.431 | -3.475±0.709 | 5.51E-06 |
| cg27380758 | 8  | 22408571  | SORBS3     | -1.733±0.316 | -1.318±0.584 | 5.52E-06 |
| cg13885201 | 16 | 71496385  | ZNF23      | -3.989±0.494 | -3.135±1.258 | 5.53E-06 |
| cg10570177 | 9  | 136324586 | CACFD1     | -4.104±0.375 | -3.749±0.436 | 5.56E-06 |
| cg01254505 | 19 | 17516470  | BST2       | -3.398±0.503 | -4.002±0.828 | 5.56E-06 |
| cg14934821 | 9  | 139228820 | GPSM1      | 2.346±0.292  | 1.884±0.674  | 5.59E-06 |
| cg01911082 | 8  | 114449272 | CSMD3      | -4.344±0.655 | -3.55±1.095  | 5.59E-06 |
| cg09309269 | 17 | 30770961  | PSMD11     | -1.503±0.392 | -2.076±0.824 | 5.60E-06 |
| cg11547724 | 11 | 6462452   | HPX        | 0.825±0.252  | 1.192±0.528  | 5.61E-06 |
| cg25809905 | 17 | 42467728  | ITGA2B     | 1.367±0.209  | 1.804±0.656  | 5.62E-06 |
| cg11527279 | 9  | 124854846 | TTLL11     | -3.194±0.48  | -2.593±0.836 | 5.66E-06 |
| cg01605783 | 21 | 45232587  | LOC284837  | -0.33±0.186  | -0.727±0.596 | 5.69E-06 |
| cg13067215 | 16 | 67427285  | TPPP3      | -2.66±0.443  | -2.66±0.538  | 5.69E-06 |
| cg10795646 | 1  | 151975566 | 0          | 0.176±0.271  | -0.377±0.827 | 5.70E-06 |
| cg25905812 | 9  | 841632    | DMRT1      | -4.191±0.548 | -3.373±1.181 | 5.70E-06 |
| cg14030359 | 14 | 21493406  | NDRG2      | -4.015±0.385 | -3.686±0.37  | 5.71E-06 |
| cg02200584 | 4  | 157892546 | PDGFC      | -4.338±0.58  | -3.713±0.828 | 5.73E-06 |
| cg16434306 | 5  | 32788128  | NPR3       | 2.944±0.236  | 2.373±0.863  | 5.73E-06 |
| cg11442717 | 6  | 170125241 | PHF10      | -4.815±0.432 | -4.079±1.085 | 5.73E-06 |
| cg26870566 | 1  | 157962475 | KIRREL     | 1.485±0.254  | 1.137±0.495  | 5.74E-06 |
| cg17386185 | 3  | 52321266  | GLYCTK     | -2.107±0.332 | -2.475±0.494 | 5.74E-06 |
| cg19921389 | 3  | 128780164 | GP9        | 2.954±0.24   | 2.708±0.318  | 5.75E-06 |
| cg18123948 | 8  | 11560781  | GATA4      | -2.007±0.343 | -1.286±1.082 | 5.77E-06 |
| cg10708793 | 17 | 40264626  | DHX58      | -4.925±0.541 | -5.386±0.52  | 5.78E-06 |
| cg04587910 | 2  | 220025744 | NHEJ1      | -2.245±0.213 | -2.475±0.305 | 5.78E-06 |
| cg18201198 | 6  | 6623578   | LY86-AS1   | 1.932±0.185  | 1.347±0.895  | 5.81E-06 |
| cg13929970 | 4  | 15939862  | FGFBP1     | 0.557±0.275  | 0.114±0.648  | 5.86E-06 |
| cg19521927 | 1  | 20395367  | PLA2G5     | 1.498±0.21   | 1.086±0.617  | 5.88E-06 |
| cg12351433 | 2  | 48982957  | LHCGR      | -2.254±0.432 | -1.574±0.992 | 5.90E-06 |
| cg24711914 | 18 | 28956567  | DSG4       | 1.075±0.316  | 0.684±0.537  | 5.90E-06 |
| cg04979933 | 1  | 67266801  | INSL5      | 1.941±0.244  | 1.341±0.91   | 5.90E-06 |
| cg10467022 | 11 | 14994983  | CALCA      | -2.356±0.333 | -1.774±0.86  | 5.91E-06 |
| cg15898840 | 7  | 45960834  | IGFBP3     | -3.071±0.981 | -2.058±1.318 | 5.91E-06 |
| cg26212229 | 18 | 19191611  | SNRPD1     | 2.722±0.215  | 2.301±0.63   | 5.92E-06 |
| cg08623947 | 20 | 30640164  | HCK        | -4.617±0.433 | -3.703±1.375 | 5.93E-06 |
| cg24171152 | 12 | 90051243  | ATP2B1     | 3.365±0.313  | 3.042±0.42   | 5.95E-06 |
| cg17185639 | 17 | 45330862  | ITGB3      | 1.349±0.321  | 1.709±0.486  | 6.00E-06 |
| cg13883681 | 16 | 58768565  | GOT2       | 0.113±0.275  | 0.522±0.592  | 6.01E-06 |

|            |    |           |          |              |              |          |
|------------|----|-----------|----------|--------------|--------------|----------|
| cg11799561 | 4  | 71227017  | SMR3A    | 1.622±0.294  | 1.215±0.577  | 6.01E-06 |
| cg17694279 | 9  | 503890    | KANK1    | -2.366±0.27  | -2.655±0.383 | 6.03E-06 |
| cg03386869 | 13 | 102104848 | ITGBL1   | 1.331±0.392  | 1.795±0.638  | 6.07E-06 |
| cg16977872 | 11 | 64008132  | FKBP2    | -4.872±0.498 | -5.286±0.455 | 6.08E-06 |
| cg10644361 | 14 | 37667230  | MIPOL1   | -3.505±0.572 | -2.903±0.791 | 6.09E-06 |
| cg17145652 | 8  | 42750650  | RNF170   | 0.854±0.284  | 0.345±0.757  | 6.12E-06 |
| cg01344171 | 6  | 43612647  | RSPH9    | -0.313±0.277 | 0.326±0.968  | 6.13E-06 |
| cg25635500 | 22 | 29712139  | RASL10A  | -1.723±0.348 | -1.015±1.064 | 6.14E-06 |
| cg13346411 | 11 | 6280512   | CCKBR    | -3.509±0.399 | -2.826±1.01  | 6.14E-06 |
| cg00094319 | 13 | 25670530  | PABPC3   | 1.607±0.332  | 2.007±0.552  | 6.15E-06 |
| cg18695917 | 4  | 163085342 | FSTL5    | -4.57±0.447  | -3.807±1.127 | 6.17E-06 |
| cg11979959 | 20 | 46414900  | SULF2    | -3.905±0.59  | -3.078±1.188 | 6.20E-06 |
| cg19378039 | 21 | 44589331  | CRYAA    | 2.515±0.329  | 1.935±0.86   | 6.20E-06 |
| cg26466858 | 1  | 152595842 | LCE3A    | -1.343±0.235 | -0.935±0.606 | 6.22E-06 |
| cg13059335 | 8  | 24242109  | ADAMDEC1 | 1.858±0.43   | 1.434±0.54   | 6.23E-06 |
| cg14312526 | 3  | 138665291 | FOXL2    | -3.081±0.467 | -2.33±1.102  | 6.24E-06 |
| cg14117297 | 19 | 4301870   | TMIGD2   | -0.486±0.232 | -0.06±0.635  | 6.25E-06 |
| cg17041296 | 1  | 76397847  | ASB17    | 1.227±0.344  | 0.616±0.899  | 6.27E-06 |
| cg03714916 | 6  | 36645886  | CDKN1A   | -3.208±0.403 | -2.815±0.497 | 6.28E-06 |
| cg00113020 | 19 | 55173482  | LILRB4   | 2.127±0.343  | 1.66±0.668   | 6.30E-06 |
| cg14045283 | 19 | 495737    | MADCAM1  | -3.913±0.399 | -4.317±0.523 | 6.31E-06 |
| cg21144270 | 2  | 242448675 | STK25    | -2.722±0.546 | -2.141±0.77  | 6.32E-06 |
| cg18463686 | 7  | 141646690 | CLEC5A   | 0.894±0.299  | 0.349±0.813  | 6.34E-06 |
| cg03251079 | 12 | 66218285  | HMGA2    | -3.168±0.497 | -2.583±0.804 | 6.34E-06 |
| cg01356829 | 1  | 67772896  | IL12RB2  | -0.272±0.266 | 0.25±0.783   | 6.34E-06 |
| cg12346881 | 5  | 150283885 | ZNF300   | 2.09±0.313   | 1.6±0.718    | 6.34E-06 |
| cg15647515 | 7  | 116963802 | WNT2     | -3.814±0.397 | -3.199±0.899 | 6.38E-06 |
| cg20283107 | 8  | 124788969 | FAM91A1  | 0.696±0.263  | 1.042±0.49   | 6.38E-06 |
| cg14188111 | 1  | 153608034 | S100A13  | 2.427±0.273  | 1.945±0.717  | 6.39E-06 |
| cg08927738 | 20 | 52687394  | BCAS1    | -0.629±0.3   | -1.083±0.662 | 6.39E-06 |
| cg07829804 | 12 | 10325287  | OLR1     | 0.834±0.319  | 0.405±0.606  | 6.39E-06 |
| cg15312323 | 17 | 39317694  | KRTAP4-4 | 0.173±0.34   | 0.493±0.396  | 6.41E-06 |
| cg06330621 | 16 | 87525461  | ZCCHC14  | -0.169±0.379 | 0.233±0.533  | 6.41E-06 |
| cg27263448 | 7  | 127637871 | SND1-IT1 | 3.114±0.409  | 3.461±0.391  | 6.42E-06 |
| cg06919203 | 20 | 3644151   | GFRA4    | -0.148±0.235 | 0.294±0.662  | 6.42E-06 |
| cg13364756 | 7  | 99425193  | CYP3A43  | 1.238±0.267  | 0.623±0.935  | 6.43E-06 |
| cg06762858 | 7  | 99971256  | PILRA    | 1.967±0.257  | 2.262±0.403  | 6.43E-06 |
| cg01824804 | 5  | 121413478 | LOX      | -3.105±0.367 | -2.646±0.643 | 6.52E-06 |
| cg14845091 | 13 | 114107956 | ADPRHL1  | 1.551±0.181  | 1.777±0.318  | 6.54E-06 |
| cg23748737 | 22 | 20791733  | SCARF2   | -3.79±0.568  | -3.09±0.979  | 6.54E-06 |
| cg27480700 | 19 | 52800524  | ZNF480   | -5.287±0.613 | -4.488±1.133 | 6.55E-06 |
| cg25455753 | 15 | 93014970  | C15orf32 | 2.65±0.299   | 2.185±0.682  | 6.56E-06 |
| cg21640749 | 17 | 72709731  | CD300LF  | 1.651±0.34   | 1.047±0.901  | 6.66E-06 |
| cg22638542 | 3  | 42624573  | SEC22C   | 2.474±0.179  | 2.637±0.198  | 6.72E-06 |
| cg03649060 | 19 | 11665451  | ELOF1    | 1.082±0.452  | 0.609±0.623  | 6.73E-06 |
| cg17665193 | 10 | 26506008  | GAD2     | -3.754±0.436 | -3.038±1.059 | 6.73E-06 |
| cg05022306 | 12 | 54403254  | HOXC8    | -4.65±0.504  | -3.784±1.288 | 6.75E-06 |
| cg27337148 | 1  | 209756976 | CAMK1G   | -1.57±0.295  | -1.059±0.761 | 6.76E-06 |
| cg08044694 | 19 | 15391927  | BRD4     | -1.912±0.516 | -1.271±0.899 | 6.78E-06 |
| cg17971003 | 11 | 107582804 | SLN      | 0.657±0.222  | 0.131±0.796  | 6.82E-06 |
| cg22290566 | 15 | 75105286  | LMAN1L   | 2.051±0.299  | 2.348±0.383  | 6.85E-06 |
| cg19601328 | 17 | 43368729  | MAP3K14  | -0.228±0.336 | 0.338±0.84   | 6.88E-06 |
| cg06981182 | 10 | 90343208  | RNLS     | -1.581±0.603 | -2.711±1.697 | 6.91E-06 |
| cg03821311 | 6  | 27836018  | HIST1H1B | 1.519±0.246  | 1.772±0.328  | 6.91E-06 |
| cg26466094 | 1  | 77748129  | AK5      | -5.031±0.331 | -4.216±1.248 | 6.96E-06 |
| cg21613754 | 2  | 219133847 | AAMP     | 1.142±0.296  | 1.569±0.62   | 6.96E-06 |
| cg01184522 | 1  | 247495818 | ZNF496   | -5.243±0.557 | -4.312±1.384 | 7.01E-06 |
| cg21944455 | 17 | 42994269  | GFAP     | 2.531±0.264  | 2.056±0.711  | 7.02E-06 |
| cg17347389 | 14 | 51562646  | TRIM9    | -4.468±0.527 | -3.753±1.027 | 7.04E-06 |
| cg03668539 | 19 | 7553324   | PEX11G   | 2.169±0.318  | 1.622±0.815  | 7.05E-06 |
| cg13669740 | 3  | 114012833 | TIGIT    | 2.368±0.4    | 1.782±0.855  | 7.06E-06 |
| cg24219058 | 4  | 30721353  | PCDH7    | -4.504±0.42  | -3.801±1.045 | 7.06E-06 |
| cg24680602 | 17 | 5026393   | ZNF232   | -3.534±0.501 | -2.847±0.99  | 7.07E-06 |
| cg09676390 | 21 | 46493345  | SSR4P1   | 0.37±0.173   | 0.06±0.465   | 7.09E-06 |
| cg15262516 | 13 | 110958418 | COL4A1   | -1.387±0.221 | -1.083±0.439 | 7.10E-06 |
| cg15702701 | 12 | 56075367  | METTL7B  | -3.524±0.387 | -3.824±0.302 | 7.13E-06 |
| cg00406188 | 1  | 152647216 | LCE2C    | 1.264±0.333  | 0.636±0.946  | 7.14E-06 |
| cg16536450 | 9  | 139658896 | LCN15    | 0.669±0.206  | 1.112±0.673  | 7.14E-06 |
| cg24506604 | 12 | 52579502  | KRT80    | 1.288±0.264  | 0.924±0.525  | 7.14E-06 |
| cg17947599 | 2  | 111556607 | ACOXL    | 2.304±0.356  | 2.636±0.411  | 7.15E-06 |



|            |    |           |            |              |              |          |
|------------|----|-----------|------------|--------------|--------------|----------|
| cg20226593 | 15 | 48498485  | SLC12A1    | 1.374±0.244  | 1.02±0.516   | 8.22E-06 |
| cg04387658 | 3  | 121775080 | CD86       | 1.323±0.241  | 0.852±0.718  | 8.23E-06 |
| cg20019546 | 7  | 37955824  | SFRP4      | -1.921±0.319 | -1.292±0.959 | 8.23E-06 |
| cg22417789 | 13 | 80915465  | SPRY2      | -4.077±0.528 | -3.533±0.724 | 8.24E-06 |
| cg02065387 | 5  | 161274307 | GABRA1     | -2.843±0.372 | -2.296±0.806 | 8.26E-06 |
| cg18153060 | 12 | 52779793  | KRT84      | 2.186±0.22   | 1.808±0.57   | 8.28E-06 |
| cg04834572 | 10 | 76868766  | DUSP13     | 3.428±0.338  | 2.947±0.706  | 8.37E-06 |
| cg05556020 | 1  | 204135243 | REN        | 1.506±0.238  | 0.865±0.995  | 8.38E-06 |
| cg23606079 | 16 | 84853871  | CRISPLD2   | 0.023±0.311  | -0.443±0.69  | 8.42E-06 |
| cg17682828 | 19 | 35632767  | FXYP7      | -2.119±0.271 | -2.534±0.616 | 8.42E-06 |
| cg24080529 | 22 | 33197034  | TIMP3      | -0.056±0.258 | 0.394±0.679  | 8.44E-06 |
| cg06713098 | 7  | 45960367  | IGFBP3     | -2.803±0.808 | -2±1.053     | 8.49E-06 |
| cg20176648 | 7  | 30951064  | AQP1       | -1.193±0.275 | -0.766±0.635 | 8.58E-06 |
| cg24488435 | 12 | 54583029  | SMUG1      | -4.191±0.322 | -4.488±0.371 | 8.59E-06 |
| cg11189837 | 21 | 28218596  | ADAMTS1    | -3.983±0.443 | -3.43±0.79   | 8.61E-06 |
| cg19258973 | 12 | 52714891  | KRT83      | 1.039±0.208  | 1.403±0.55   | 8.62E-06 |
| cg22282672 | 5  | 121465223 | ZNF474     | -2.742±0.384 | -2.243±0.72  | 8.64E-06 |
| cg01939681 | 5  | 160975024 | GABRB2     | -4.213±0.351 | -3.54±1.026  | 8.65E-06 |
| cg23042138 | 3  | 47165568  | SETD2      | 2.217±0.203  | 2.022±0.252  | 8.66E-06 |
| cg25140370 | 6  | 391114    | IRF4       | -4.04±0.491  | -3.4±0.925   | 8.71E-06 |
| cg11016563 | 11 | 101454626 | TRPC6      | -3.192±0.296 | -2.775±0.613 | 8.73E-06 |
| cg09208010 | 14 | 23305780  | MMP14      | -2.252±0.535 | -1.584±0.955 | 8.83E-06 |
| cg22920417 | 18 | 74401671  | 0          | -0.561±0.314 | -1.042±0.715 | 8.84E-06 |
| cg03686067 | 18 | 66504389  | CCDC102B   | 1.845±0.285  | 1.376±0.705  | 8.86E-06 |
| cg17729941 | 1  | 153607617 | S100A13    | -1.128±0.292 | -1.562±0.644 | 8.90E-06 |
| cg16131766 | 15 | 23810280  | MKRN3      | 1.287±0.393  | 0.705±0.862  | 8.90E-06 |
| cg17465827 | 4  | 148538229 | TMEM184C   | -2.108±0.295 | -2.414±0.411 | 8.91E-06 |
| cg26766480 | 9  | 21350197  | 0          | 1.832±0.283  | 1.307±0.792  | 8.93E-06 |
| cg17647273 | 22 | 24891452  | UPB1       | 2.782±0.227  | 2.349±0.661  | 8.97E-06 |
| cg06327515 | 5  | 140603261 | PCDHB14    | -1.79±0.38   | -1.083±1.076 | 9.02E-06 |
| cg19591206 | 3  | 133748809 | SLCO2A1    | -5.064±0.777 | -4.239±1.12  | 9.03E-06 |
| cg17067005 | 1  | 206945346 | IL10       | 2.831±0.245  | 2.591±0.314  | 9.03E-06 |
| cg18661868 | 15 | 91427965  | FES        | -1.549±0.273 | -1.268±0.376 | 9.04E-06 |
| cg03054529 | 7  | 30029938  | SCRN1      | 1.228±0.263  | 0.71±0.793   | 9.05E-06 |
| cg17886204 | 15 | 100346994 | DNM1P46    | -6.027±0.828 | -4.583±2.187 | 9.11E-06 |
| cg09037858 | 8  | 22103057  | POLR3D     | -4.026±0.541 | -3.598±0.462 | 9.13E-06 |
| cg14617642 | 10 | 71812630  | H2AFY2     | -5.248±0.615 | -4.52±1.027  | 9.20E-06 |
| cg14440664 | 9  | 5509642   | PDCC1LG2   | 0.712±0.351  | 1.155±0.636  | 9.20E-06 |
| cg08603768 | 5  | 137420044 | WNT8A      | 0.817±0.246  | 0.444±0.557  | 9.29E-06 |
| cg05396987 | 4  | 122686269 | TMEM155    | -3.974±0.398 | -3.395±0.856 | 9.31E-06 |
| cg16205058 | 14 | 20924369  | APEX1      | -1.864±0.385 | -2.304±0.614 | 9.31E-06 |
| cg04532952 | 17 | 58227745  | CA4        | -3.01±0.527  | -2.354±0.939 | 9.31E-06 |
| cg15195353 | 16 | 4382775   | GLIS2      | 2.598±0.183  | 2.439±0.191  | 9.32E-06 |
| cg24364574 | 20 | 47443694  | PREX1      | -2.817±0.359 | -2.225±0.893 | 9.41E-06 |
| cg26119740 | 11 | 73881915  | C2CD3      | -1.654±0.361 | -1.961±0.363 | 9.43E-06 |
| cg15878317 | 3  | 139396782 | NMNAT3     | -4.183±0.362 | -3.563±0.94  | 9.43E-06 |
| cg12215675 | 6  | 167738594 | TTLL2      | 3.668±0.288  | 3.365±0.411  | 9.47E-06 |
| cg13378388 | 4  | 177713813 | VEGFC      | -4.836±0.556 | -4.043±1.171 | 9.50E-06 |
| cg11466485 | 9  | 136605868 | SARDH      | 3.077±0.264  | 2.756±0.458  | 9.59E-06 |
| cg08859675 | 19 | 10563771  | PDE4A      | 2.106±0.15   | 2.306±0.291  | 9.59E-06 |
| cg16391792 | 15 | 58723657  | LIPC       | 1.009±0.338  | 0.514±0.735  | 9.59E-06 |
| cg02545192 | 5  | 1294729   | TERT       | -4.246±0.476 | -3.222±1.583 | 9.65E-06 |
| cg27092035 | 5  | 175792880 | ARL10      | -4.632±0.319 | -3.994±0.98  | 9.65E-06 |
| cg22131691 | 7  | 32110988  | PDE1C      | -3.619±0.454 | -2.956±0.984 | 9.68E-06 |
| cg02657360 | 11 | 2020560   | H19        | -0.075±0.211 | -0.481±0.624 | 9.71E-06 |
| cg27049761 | 12 | 122688708 | B3GNT4     | -4.34±0.597  | -3.363±1.474 | 9.71E-06 |
| cg01795122 | 19 | 48828859  | EMP3       | -4.316±0.738 | -4.974±0.811 | 9.73E-06 |
| cg06659073 | 6  | 158589307 | SERAC1     | -3.095±0.463 | -2.737±0.373 | 9.78E-06 |
| cg23534142 | 1  | 212739113 | ATF3       | 2.48±0.428   | 2.028±0.617  | 9.79E-06 |
| cg09571369 | 3  | 150996563 | P2RY14     | 0.736±0.31   | 1.13±0.565   | 9.83E-06 |
| cg13015534 | 17 | 74639793  | ST6GALNAC1 | -0.891±0.356 | -1.338±0.645 | 9.89E-06 |
| cg04278702 | 6  | 87647399  | HTR1E      | -3.912±0.52  | -3.165±1.108 | 9.90E-06 |
| cg09539538 | 20 | 6104215   | FERMT1     | 0.08±0.239   | -0.329±0.622 | 9.91E-06 |
| cg05590982 | 16 | 28550171  | NUPR1      | -1.673±0.459 | -1.061±0.895 | 9.94E-06 |
| cg04458548 | 3  | 186356700 | FETUB      | 1.583±0.244  | 1.174±0.619  | 9.95E-06 |
| cg19850406 | 12 | 117174732 | C12orf49   | -1.473±0.29  | -1.807±0.469 | 9.97E-06 |
| cg06852744 | 7  | 44142973  | AEBP1      | 2.906±0.26   | 2.456±0.685  | 9.98E-06 |
| cg16879596 | 7  | 99277978  | CYP3A5     | 1.574±0.241  | 1.071±0.778  | 1.00E-05 |
| cg02498063 | 12 | 119772577 | CCDC60     | 0.113±0.216  | 0.611±0.775  | 1.01E-05 |
| cg03856723 | 19 | 14229466  | PRKACA     | -3.921±0.431 | -3.57±0.399  | 1.01E-05 |

|            |    |           |              |              |              |          |
|------------|----|-----------|--------------|--------------|--------------|----------|
| cg16759954 | 17 | 6461153   | ACKR6        | 3.286±0.239  | 3.058±0.297  | 1.01E-05 |
| cg06849227 | 17 | 61599694  | KCNH6        | 3.952±0.305  | 3.121±1.304  | 1.02E-05 |
| cg05564251 | 2  | 231090640 | SP140        | 1.855±0.486  | 1.233±0.902  | 1.02E-05 |
| cg12113819 | 12 | 116716154 | MED13L       | -0.314±0.383 | 0.144±0.653  | 1.02E-05 |
| cg15551881 | 9  | 123688715 | TRAF1        | 1.165±0.393  | 0.532±0.957  | 1.02E-05 |
| cg03608974 | 2  | 173940268 | ZAK          | -2.578±0.463 | -2.109±0.628 | 1.03E-05 |
| cg25759381 | 22 | 19118539  | TSSK2        | 2.288±0.26   | 2.547±0.345  | 1.03E-05 |
| cg20439022 | 22 | 38478787  | SLC16A8      | -0.329±0.252 | 0.131±0.705  | 1.04E-05 |
| cg26697117 | 17 | 3820518   | P2RX1        | 0.564±0.189  | 0.318±0.358  | 1.04E-05 |
| cg04705866 | 5  | 54320790  | GZMK         | 1.856±0.232  | 1.514±0.512  | 1.04E-05 |
| cg04532229 | 2  | 103235411 | SLC9A2       | -5.415±0.544 | -4.871±0.726 | 1.04E-05 |
| cg03608577 | 6  | 29342679  | OR12D3       | 1.893±0.248  | 1.378±0.797  | 1.05E-05 |
| cg23349242 | 22 | 24577448  | SUSD2        | 0.521±0.184  | 0.214±0.467  | 1.05E-05 |
| cg04595372 | 6  | 49681233  | CRISP2       | 0.232±0.308  | 0.753±0.793  | 1.05E-05 |
| cg17685628 | 14 | 37051693  | NKX2-8       | -2.779±0.575 | -2.139±0.894 | 1.05E-05 |
| cg05657520 | 1  | 203462521 | OPTC         | 2.609±0.162  | 2.161±0.704  | 1.06E-05 |
| cg00826384 | 7  | 121513065 | PTPRZ1       | -4±0.467     | -3.481±0.724 | 1.06E-05 |
| cg26607785 | 17 | 45810424  | TBX21        | -1.913±0.246 | -1.376±0.836 | 1.06E-05 |
| cg27525902 | 15 | 49716247  | FGF7         | 0.402±0.323  | 0.752±0.486  | 1.06E-05 |
| cg05593325 | 9  | 101569696 | GALNT12      | -1.334±0.216 | -1.703±0.562 | 1.06E-05 |
| cg27276456 | 19 | 58180770  | ZSCAN4       | 3.6±0.268    | 3.201±0.599  | 1.07E-05 |
| cg20603888 | 15 | 48470973  | MYEF2        | 1.486±0.333  | 1.861±0.526  | 1.07E-05 |
| cg20540428 | 3  | 73045686  | PPP4R2       | 0.333±0.432  | -0.099±0.578 | 1.08E-05 |
| cg11961618 | 11 | 2951844   | PHLDA2       | -4.188±0.303 | -4.473±0.368 | 1.08E-05 |
| cg11265941 | 15 | 25068738  | SNRPN        | -0.918±0.176 | -0.461±0.718 | 1.08E-05 |
| cg18655915 | 7  | 87109799  | 0            | 1.468±0.224  | 1.218±0.35   | 1.08E-05 |
| cg16378421 | 3  | 183736171 | ABCC5        | -4.717±0.478 | -4.168±0.778 | 1.08E-05 |
| cg21400896 | 17 | 47288569  | GNGT2        | 0.009±0.246  | 0.483±0.732  | 1.08E-05 |
| cg13888886 | 20 | 55904640  | SPO11        | 2.658±0.241  | 2.307±0.525  | 1.08E-05 |
| cg20586531 | 3  | 146263147 | PLSCR1       | 1.962±0.282  | 1.628±0.477  | 1.09E-05 |
| cg05937453 | 10 | 99531765  | SFRP5        | -5.01±0.661  | -4.13±1.294  | 1.09E-05 |
| cg00481227 | 20 | 36322069  | CTNBNL1      | -2.624±0.33  | -3.017±0.563 | 1.09E-05 |
| cg10983208 | 10 | 73848320  | SPOCK2       | -2.764±0.465 | -3.41±0.959  | 1.09E-05 |
| cg23978557 | 6  | 109760819 | SMPD2        | 1.06±0.298   | 0.558±0.765  | 1.10E-05 |
| cg13264741 | 12 | 14133426  | GRIN2B       | -4.203±0.599 | -3.426±1.137 | 1.10E-05 |
| cg01584473 | 7  | 100663367 | MUC17        | 2.128±0.173  | 1.815±0.48   | 1.10E-05 |
| cg18821742 | 4  | 30722274  | PCDH7        | -4.238±0.532 | -3.548±1.01  | 1.10E-05 |
| cg07634706 | 16 | 57438524  | CCL17        | 2.488±0.202  | 2.678±0.246  | 1.10E-05 |
| cg07663789 | 5  | 32711429  | NPR3         | -4.929±0.551 | -4.127±1.201 | 1.11E-05 |
| cg03724463 | 3  | 42306524  | CCK          | -2.188±0.382 | -1.637±0.824 | 1.12E-05 |
| cg17872757 | 11 | 128564180 | FLI1         | -4.978±0.646 | -3.739±1.915 | 1.12E-05 |
| cg10322876 | 19 | 41496749  | CYP2B6       | 2.104±0.181  | 1.814±0.441  | 1.13E-05 |
| cg07422345 | 19 | 33793987  | CEBPA-AS1    | -4.435±0.645 | -3.795±0.856 | 1.13E-05 |
| cg11619390 | 1  | 32931179  | ZBTB8B       | -1.935±0.245 | -1.45±0.752  | 1.13E-05 |
| cg21516287 | 7  | 150020855 | ACTR3C       | -3.551±0.574 | -4.107±0.735 | 1.13E-05 |
| cg08090772 | 8  | 67344640  | ADHFE1       | -4.409±0.459 | -3.674±1.116 | 1.13E-05 |
| cg20469837 | 2  | 158114300 | GALNT5       | -1.49±0.369  | -1.156±0.424 | 1.13E-05 |
| cg05921324 | 11 | 116694114 | APOA4        | 0.817±0.218  | 0.413±0.623  | 1.13E-05 |
| cg24231716 | 5  | 76934501  | OTP          | -2.595±0.296 | -2.132±0.703 | 1.13E-05 |
| cg13755070 | 11 | 128563714 | FLI1         | -4.359±0.528 | -3.528±1.259 | 1.14E-05 |
| cg10840135 | 22 | 42526619  | CYP2D6       | 1.992±0.359  | 1.628±0.492  | 1.14E-05 |
| cg24084891 | 18 | 49868788  | DCC          | -2.935±0.458 | -2.271±0.996 | 1.14E-05 |
| cg18589624 | 7  | 30791294  | INMT-FAM188B | 1.574±0.149  | 1.804±0.349  | 1.15E-05 |
| cg03380645 | 2  | 85895048  | SFTPB        | 1.142±0.326  | 0.609±0.812  | 1.15E-05 |
| cg14448104 | 20 | 43933556  | MATN4        | 2.704±0.437  | 3.105±0.512  | 1.15E-05 |
| cg03599338 | 22 | 24577315  | SUSD2        | 0.651±0.168  | 0.316±0.522  | 1.15E-05 |
| cg00556408 | 22 | 37500588  | TMPRSS6      | 1.769±0.134  | 1.941±0.251  | 1.15E-05 |
| cg02092466 | 2  | 11810631  | NTSR2        | 0.181±0.31   | -0.319±0.76  | 1.15E-05 |
| cg17917518 | 12 | 121647183 | P2RX4        | 4.208±0.371  | 3.225±1.551  | 1.16E-05 |
| cg17301902 | 9  | 80263219  | GNA14        | -3.306±0.436 | -2.802±0.718 | 1.16E-05 |
| cg11911418 | 18 | 48493759  | ELAC1        | 3.476±0.371  | 2.667±1.264  | 1.16E-05 |
| cg09565688 | 12 | 10161879  | CLEC12B      | 1.532±0.283  | 1.251±0.376  | 1.17E-05 |
| cg23548479 | 11 | 2906679   | CDKN1C       | -4.742±0.63  | -4.204±0.65  | 1.17E-05 |
| cg06048973 | 15 | 35088107  | ACTC1        | 0.666±0.268  | 1.121±0.697  | 1.17E-05 |
| cg01765461 | 18 | 59992984  | TNFRSF11A    | -4.525±0.346 | -4.827±0.373 | 1.18E-05 |
| cg13156411 | 3  | 46919454  | PTH1R        | 3.217±0.22   | 3±0.29       | 1.18E-05 |
| cg26750747 | 11 | 71899966  | FOLR1        | 1.835±0.269  | 2.174±0.494  | 1.19E-05 |
| cg10098888 | 2  | 227665799 | 0            | -3.792±0.708 | -4.353±0.626 | 1.20E-05 |
| cg05193832 | 11 | 128736844 | KCNJ1        | 2.528±0.22   | 2.069±0.717  | 1.20E-05 |
| cg16211684 | 10 | 85954622  | CDHR1        | -4.36±0.284  | -3.693±1.05  | 1.21E-05 |





|            |    |           |                  |              |              |          |
|------------|----|-----------|------------------|--------------|--------------|----------|
| cg02192855 | 6  | 26273199  | <i>HIST1H2BI</i> | -4.507±0.406 | -3.534±1.562 | 1.67E-05 |
| cg08942800 | 6  | 49681310  | <i>CRISP2</i>    | -0.085±0.465 | 0.628±1.103  | 1.67E-05 |
| cg24727203 | 8  | 9007933   | <i>PPP1R3B</i>   | -3.682±0.395 | -3.339±0.436 | 1.68E-05 |
| cg06626655 | 1  | 38099916  | <i>RSP01</i>     | -3.65±0.456  | -3.123±0.77  | 1.69E-05 |
| cg03309967 | 19 | 36235184  | <i>U2AF1L4</i>   | 0.819±0.269  | 0.443±0.574  | 1.69E-05 |
| cg02588309 | 5  | 40756462  | <i>TTC33</i>     | -1.537±0.309 | -2.027±0.762 | 1.70E-05 |
| cg17929627 | 10 | 129924035 | <i>MKI67</i>     | -4.216±0.274 | -4.419±0.212 | 1.70E-05 |
| cg16065186 | 17 | 37856663  | <i>ERBB2</i>     | -4.103±0.687 | -3.474±0.83  | 1.70E-05 |
| cg15350036 | 7  | 86973677  | <i>TP53TG1</i>   | 0.825±0.291  | 1.214±0.584  | 1.71E-05 |
| cg17484237 | 5  | 156536107 | <i>HAVCR2</i>    | -1.103±0.265 | -1.731±1.008 | 1.71E-05 |
| cg06821120 | 3  | 50375459  | <i>RASSF1</i>    | -0.62±0.281  | -1.268±1.039 | 1.72E-05 |
| cg20425130 | 3  | 183273245 | <i>KLHL6</i>     | 0.207±0.297  | 0.692±0.758  | 1.72E-05 |
| cg27425675 | 16 | 11035733  | <i>DEXI</i>      | 0.024±0.212  | 0.219±0.259  | 1.73E-05 |
| cg16112129 | 5  | 174870968 | <i>DRD1</i>      | -3.919±0.414 | -3.291±0.974 | 1.74E-05 |
| cg06781209 | 11 | 61594997  | <i>FADS2</i>     | -3.038±0.541 | -2.469±0.809 | 1.75E-05 |
| cg14519000 | 20 | 61041765  | <i>GATA5</i>     | 2.847±0.317  | 2.406±0.674  | 1.76E-05 |
| cg19561186 | 3  | 108673045 | <i>GUCA1C</i>    | 0.939±0.355  | 0.492±0.644  | 1.77E-05 |
| cg20774846 | 8  | 105479420 | <i>DPYS</i>      | -0.634±0.324 | -0.11±0.82   | 1.78E-05 |
| cg00968931 | 19 | 3762178   | <i>MRPL54</i>    | 0.389±0.25   | 0.071±0.478  | 1.79E-05 |
| cg10545682 | 1  | 151512625 | <i>TUFT1</i>     | -4.997±0.42  | -5.346±0.43  | 1.79E-05 |
| cg19895197 | 17 | 37887061  | <i>MIEN1</i>     | -4.466±0.322 | -4.764±0.399 | 1.80E-05 |
| cg14960043 | 6  | 35265624  | <i>DEF6</i>      | -3.354±0.495 | -3.751±0.469 | 1.80E-05 |
| cg02153528 | 12 | 56618648  | <i>NABP2</i>     | -2.958±0.359 | -2.481±0.723 | 1.81E-05 |
| cg22220722 | 1  | 20306641  | <i>PLA2G2A</i>   | 1.616±0.326  | 1.249±0.534  | 1.81E-05 |
| cg26556134 | 12 | 53492729  | <i>IGFBP6</i>    | 0.33±0.285   | 0.654±0.472  | 1.82E-05 |
| cg16150435 | 6  | 31080529  | <i>C6orf15</i>   | 1.532±0.196  | 1.298±0.346  | 1.82E-05 |
| cg01658815 | 10 | 116444040 | <i>ABLIM1</i>    | -1.052±0.334 | -0.609±0.672 | 1.82E-05 |
| cg06240124 | 16 | 23690079  | <i>PLK1</i>      | -4.89±0.298  | -5.195±0.429 | 1.82E-05 |
| cg23452458 | 17 | 45899388  | <i>OSBPL7</i>    | -3.854±0.398 | -3.474±0.517 | 1.82E-05 |
| cg07737781 | 7  | 73038866  | <i>SLX1PL</i>    | -3.184±0.454 | -2.709±0.675 | 1.82E-05 |
| cg00943245 | 5  | 140867386 | <i>PCDHGC5</i>   | 1.73±0.181   | 1.347±0.613  | 1.83E-05 |
| cg25162301 | 3  | 186330055 | <i>AHSG</i>      | 2.465±0.243  | 2.038±0.674  | 1.83E-05 |
| cg01593886 | 17 | 48278778  | <i>COL1A1</i>    | -3.625±0.502 | -3.098±0.75  | 1.83E-05 |
| cg21624359 | 19 | 35848801  | <i>FFAR3</i>     | 0.568±0.273  | 0.152±0.646  | 1.83E-05 |
| cg06907544 | 15 | 23255227  | <i>GOLGA8I</i>   | 1.74±0.205   | 1.532±0.291  | 1.83E-05 |
| cg27060381 | 22 | 30723363  | <i>TBC1D10A</i>  | -3.229±0.308 | -2.897±0.475 | 1.84E-05 |
| cg08101264 | 20 | 44486710  | <i>ZSWIM3</i>    | -3.791±0.435 | -2.855±1.501 | 1.85E-05 |
| cg22518733 | 17 | 34417575  | <i>CCL3</i>      | -0.693±0.328 | -1.197±0.785 | 1.85E-05 |
| cg23667432 | 2  | 233244439 | <i>ALPP</i>      | -0.505±0.193 | -0.274±0.344 | 1.86E-05 |
| cg11692477 | 2  | 190445477 | <i>SLC40A1</i>   | -5.531±0.567 | -4.983±0.752 | 1.87E-05 |
| cg19884658 | 1  | 6664268   | <i>KLHL21</i>    | -1.295±0.41  | -0.615±1.068 | 1.87E-05 |
| cg23839680 | 7  | 56118238  | <i>PSPH</i>      | -0.02±0.307  | -0.537±0.815 | 1.87E-05 |
| cg15046675 | 19 | 49838777  | <i>CD37</i>      | 0.906±0.452  | 0.347±0.837  | 1.87E-05 |
| cg07952391 | 2  | 88470173  | <i>THNSL2</i>    | -3.667±0.606 | -2.743±1.439 | 1.87E-05 |
| cg05010967 | 6  | 44310640  | <i>SPATS1</i>    | -1.989±0.409 | -1.257±1.159 | 1.87E-05 |
| cg04645342 | 1  | 72748124  | <i>NEGR1</i>     | -3.864±0.386 | -3.166±1.108 | 1.88E-05 |
| cg03343942 | 12 | 56625109  | <i>SLC39A5</i>   | 1.132±0.332  | 0.661±0.725  | 1.89E-05 |
| cg22915732 | 8  | 62200518  | <i>CLVS1</i>     | -3.508±0.452 | -2.869±0.984 | 1.89E-05 |
| cg15765212 | 6  | 31589161  | <i>PRRC2A</i>    | -3.854±0.25  | -3.506±0.535 | 1.90E-05 |
| cg14401897 | 19 | 1174667   | <i>SBNO2</i>     | 3.248±0.306  | 2.863±0.579  | 1.90E-05 |
| cg22325823 | 17 | 72667062  | <i>RAB37</i>     | -1.768±0.439 | -2.268±0.732 | 1.90E-05 |
| cg07845390 | 1  | 196577709 | <i>KCNT2</i>     | -4.328±0.407 | -3.731±0.924 | 1.90E-05 |
| cg05666713 | 1  | 201181883 | <i>IGFN1</i>     | 1.826±0.319  | 1.429±0.597  | 1.90E-05 |
| cg03773789 | 8  | 144348945 | <i>GLI4</i>      | -3.464±0.401 | -3.834±0.496 | 1.91E-05 |
| cg14916079 | 10 | 120788696 | <i>NANOS1</i>    | -1.946±0.36  | -1.348±0.941 | 1.91E-05 |
| cg25050026 | 3  | 158519410 | <i>MFSD1</i>     | -2.438±0.487 | -1.746±1.066 | 1.92E-05 |
| cg24404909 | 14 | 105175111 | <i>INF2</i>      | -3.446±0.358 | -3.814±0.521 | 1.92E-05 |
| cg06456031 | 7  | 134832850 | <i>TMEM140</i>   | -4.143±0.436 | -4.603±0.659 | 1.94E-05 |
| cg01589580 | 18 | 77440800  | <i>CTDP1</i>     | -1.406±0.333 | -2.043±1.017 | 1.95E-05 |
| cg04106785 | 17 | 30813145  | <i>CDK5R1</i>    | 1.143±0.293  | 0.534±0.979  | 1.96E-05 |
| cg13694749 | 17 | 62050038  | <i>SCN4A</i>     | 2.04±0.315   | 1.547±0.772  | 1.96E-05 |
| cg26775866 | 5  | 159849193 | <i>PTTG1</i>     | -3.689±0.39  | -4.043±0.47  | 1.97E-05 |
| cg21578906 | 22 | 32651345  | <i>SLC5A4</i>    | 2.71±0.304   | 2.206±0.795  | 1.98E-05 |
| cg21639401 | 17 | 41050668  | <i>LINC00671</i> | 1.896±0.178  | 1.592±0.481  | 1.98E-05 |
| cg22377998 | 22 | 20004881  | <i>ARVCF</i>     | -3.206±0.359 | -3.592±0.557 | 1.98E-05 |
| cg10846922 | 5  | 104435608 | <i>RAB9BP1</i>   | 2.001±0.303  | 1.576±0.654  | 1.98E-05 |
| cg11154542 | 9  | 90340652  | <i>CTSL</i>      | -2.669±0.388 | -2.253±0.6   | 1.98E-05 |
| cg26202340 | 11 | 126152357 | <i>TIRAP</i>     | -2.331±0.365 | -2.77±0.656  | 1.98E-05 |
| cg07540118 | 5  | 157002713 | <i>ADAM19</i>    | -4.647±0.497 | -3.906±1.154 | 1.99E-05 |
| cg01399317 | 8  | 144810339 | <i>FAM83H</i>    | 1.227±0.436  | 1.654±0.594  | 1.99E-05 |

|            |    |           |           |              |              |          |
|------------|----|-----------|-----------|--------------|--------------|----------|
| cg02786378 | 8  | 17396844  | SLC7A2    | 0.776±0.286  | 0.487±0.39   | 2.00E-05 |
| cg17296166 | 19 | 46974567  | PNMAL1    | -3.504±0.466 | -2.927±0.869 | 2.00E-05 |
| cg10025443 | 9  | 93564339  | SYK       | -3.618±0.303 | -3.909±0.402 | 2.02E-05 |
| cg06378107 | 11 | 100863057 | TMEM133   | 1.991±0.265  | 2.31±0.477   | 2.02E-05 |
| cg15550350 | 3  | 141497168 | GRK7      | 3.079±0.243  | 2.804±0.406  | 2.02E-05 |
| cg26689483 | 4  | 17513197  | QDPR      | -3.86±0.47   | -3.306±0.825 | 2.05E-05 |
| cg08821669 | 12 | 120875978 | COX6A1    | -3.85±0.323  | -3.579±0.341 | 2.05E-05 |
| cg18619398 | 20 | 57416506  | GNAS      | 0.324±0.124  | 0.588±0.426  | 2.05E-05 |
| cg10964421 | 8  | 23021093  | TNFRSF10D | -3.203±0.386 | -2.903±0.348 | 2.06E-05 |
| cg09056317 | 19 | 36607008  | POLR2I    | -1.661±0.32  | -1.212±0.694 | 2.06E-05 |
| cg11285003 | 5  | 45696592  | HCN1      | -3.544±0.441 | -2.907±0.988 | 2.06E-05 |
| cg06367117 | 17 | 26903928  | ALDOC     | -4.696±0.573 | -3.502±1.926 | 2.07E-05 |
| cg07684809 | 12 | 75728212  | GLIPR1L1  | -3.874±0.477 | -3.055±1.301 | 2.07E-05 |
| cg24662718 | 1  | 108507468 | VAV3      | -3.803±0.342 | -2.776±1.681 | 2.07E-05 |
| cg19491035 | 12 | 12502846  | MANSC1    | -2.347±0.427 | -1.842±0.754 | 2.08E-05 |
| cg00413066 | 15 | 52405464  | BCL2L10   | 2.048±0.411  | 2.388±0.421  | 2.09E-05 |
| cg22064129 | 18 | 43194482  | SLC14A2   | 1.93±0.316   | 1.557±0.557  | 2.09E-05 |
| cg08013810 | 20 | 34389239  | PHF20     | 1.416±0.237  | 1.011±0.644  | 2.10E-05 |
| cg20716119 | 16 | 68771763  | CDH1      | -2.562±0.551 | -2.043±0.71  | 2.10E-05 |
| cg19166875 | 10 | 95241944  | MYOF      | -3.036±0.367 | -2.703±0.446 | 2.11E-05 |
| cg20256494 | 22 | 30116439  | CABP7     | -3.415±0.6   | -2.587±1.278 | 2.11E-05 |
| cg16636110 | 19 | 57702479  | ZNF264    | 0.41±0.299   | 0.829±0.648  | 2.11E-05 |
| cg05836145 | 7  | 20827117  | SP8       | -0.365±0.128 | 0.046±0.676  | 2.11E-05 |
| cg18849169 | 5  | 150399781 | GPX3      | 0.875±0.18   | 0.498±0.608  | 2.13E-05 |
| cg23458892 | 19 | 51645979  | SIGLEC7   | 2.17±0.216   | 1.78±0.625   | 2.14E-05 |
| cg00727947 | 19 | 54825100  | LILRA5    | 3.354±0.314  | 2.907±0.695  | 2.14E-05 |
| cg02254461 | 3  | 39195904  | CSRN1P1   | 0.36±0.424   | 0.964±0.937  | 2.14E-05 |
| cg10202457 | 1  | 183387751 | NMNAT2    | -2.26±0.384  | -1.832±0.63  | 2.15E-05 |
| cg02136132 | 14 | 90527891  | KCNK13    | -3.946±0.426 | -3.229±1.139 | 2.16E-05 |
| cg25351036 | 4  | 48018582  | NIPAL1    | -3.992±0.263 | -4.182±0.201 | 2.16E-05 |
| cg02430692 | 3  | 179754239 | PEX5L     | -4.063±0.449 | -3.553±0.755 | 2.17E-05 |
| cg18416881 | 7  | 134143823 | AKR1B1    | -5.456±0.578 | -4.016±2.352 | 2.18E-05 |
| cg27345534 | 12 | 11509583  | PRB1      | 0.282±0.293  | -0.165±0.696 | 2.18E-05 |
| cg00901493 | 17 | 7197375   | YBX2      | -3.688±0.391 | -3.246±0.654 | 2.19E-05 |
| cg06501070 | 1  | 85331899  | LPAR3     | 0.846±0.264  | 1.196±0.537  | 2.20E-05 |
| cg15105660 | 3  | 190039935 | CLDN1     | -2.842±0.371 | -3.278±0.652 | 2.21E-05 |
| cg22367970 | 1  | 155826954 | GON4L     | -2.147±0.518 | -2.605±0.6   | 2.21E-05 |
| cg02515725 | 4  | 186456935 | PDLIM3    | -3.283±0.457 | -2.832±0.633 | 2.21E-05 |
| cg17030820 | 10 | 51549260  | MSMB      | 2.865±0.261  | 2.355±0.821  | 2.21E-05 |
| cg01926595 | 17 | 4851808   | PFN1      | -3.054±0.535 | -2.635±0.494 | 2.21E-05 |
| cg21859434 | 2  | 136876021 | CXCR4     | -5.966±0.473 | -4.764±1.966 | 2.21E-05 |
| cg16433922 | 7  | 37956704  | SFRP4     | -3.451±0.26  | -3.225±0.295 | 2.22E-05 |
| cg22197708 | 11 | 59855616  | MS4A2     | 1.509±0.361  | 0.979±0.829  | 2.22E-05 |
| cg13496838 | 2  | 223164747 | PAX3      | -2.711±0.394 | -2.102±0.961 | 2.23E-05 |
| cg26151675 | 1  | 24240069  | CNR2      | -0.058±0.352 | -0.61±0.873  | 2.24E-05 |
| cg09150117 | 7  | 96653867  | DLX5      | -3.682±0.537 | -2.877±1.263 | 2.24E-05 |
| cg20034100 | 6  | 125304496 | RNF217    | 1.971±0.372  | 1.573±0.579  | 2.24E-05 |
| cg15050111 | 1  | 24645850  | GRHL3     | -3.595±0.252 | -3.808±0.273 | 2.26E-05 |
| cg05475277 | 22 | 36902578  | FOXRED2   | 4.492±0.428  | 3.739±1.205  | 2.27E-05 |
| cg06321883 | 6  | 70576541  | COL19A1   | -3.427±0.279 | -2.54±1.463  | 2.28E-05 |
| cg14425294 | 17 | 7905636   | GUCY2D    | -2.059±0.339 | -1.4±1.063   | 2.28E-05 |
| cg10516359 | 11 | 45827763  | SLC35C1   | 3.02±0.459   | 3.622±0.925  | 2.28E-05 |
| cg20291222 | 12 | 75784541  | GLIPR1L2  | -2.362±0.46  | -2.84±0.688  | 2.28E-05 |
| cg22009923 | 11 | 832065    | CD151     | 1.284±0.165  | 1.069±0.33   | 2.29E-05 |
| cg04365980 | 16 | 78056736  | CLEC3A    | 0.331±0.26   | -0.079±0.65  | 2.30E-05 |
| cg24202119 | 5  | 35938692  | CAPSL     | -0.829±0.299 | -1.316±0.773 | 2.30E-05 |
| cg20308817 | 19 | 51225848  | CLEC11A   | 0.705±0.341  | 1.221±0.813  | 2.31E-05 |
| cg04424621 | 6  | 27101941  | HIST1H2BJ | -0.946±0.347 | -1.697±1.222 | 2.34E-05 |
| cg03902905 | 2  | 44502262  | SLC3A1    | 1.42±0.283   | 1.176±0.32   | 2.34E-05 |
| cg00466492 | 19 | 7991731   | CTXN1     | 1.475±0.314  | 0.907±0.913  | 2.34E-05 |
| cg15887846 | 11 | 65779192  | CST6      | -1.018±0.209 | -1.365±0.552 | 2.35E-05 |
| cg17644208 | 2  | 25142391  | ADCY3     | -0.571±0.128 | -0.689±0.161 | 2.35E-05 |
| cg24332422 | 5  | 112073686 | APC       | -2.656±0.378 | -1.82±1.363  | 2.36E-05 |
| cg15003158 | 5  | 68628431  | 0         | -2.379±0.568 | -3.061±1.03  | 2.36E-05 |
| cg18902090 | 5  | 140306249 | PCDHAC1   | -3.093±0.595 | -2.552±0.733 | 2.36E-05 |
| cg13685294 | 3  | 51743318  | GRM2      | 3.861±0.391  | 3.371±0.748  | 2.36E-05 |
| cg27268486 | 7  | 79764291  | GNAI1     | -4.435±0.619 | -3.847±0.815 | 2.36E-05 |
| cg04237003 | 11 | 61522002  | MYRF      | 0.821±0.209  | 1.197±0.604  | 2.37E-05 |
| cg24134767 | 11 | 113845638 | HTR3A     | -1.064±0.275 | -1.487±0.669 | 2.37E-05 |
| cg15582891 | 6  | 132967028 | TAAR1     | 0.552±0.318  | 0.157±0.602  | 2.38E-05 |

|            |    |           |           |              |              |          |
|------------|----|-----------|-----------|--------------|--------------|----------|
| cg24919884 | 1  | 3380288   | ARHGEF16  | 2.603±0.347  | 2.218±0.569  | 2.40E-05 |
| cg13705284 | 3  | 58523313  | ACOX2     | -0.274±0.291 | -0.713±0.692 | 2.40E-05 |
| cg21636577 | 17 | 7121881   | DLG4      | 1.371±0.173  | 0.972±0.653  | 2.40E-05 |
| cg22659356 | 2  | 169104591 | STK39     | -4.765±0.36  | -5.107±0.475 | 2.40E-05 |
| cg08418111 | 11 | 18433745  | LDHC      | -0.864±0.579 | -0.234±0.925 | 2.40E-05 |
| cg14237152 | 17 | 25957777  | LGALS9    | 1.437±0.259  | 1.097±0.525  | 2.41E-05 |
| cg14365123 | 1  | 2938246   | ACTRT2    | 2.976±0.772  | 3.62±0.819   | 2.41E-05 |
| cg04970352 | 11 | 44327399  | ALX4      | -3.076±0.552 | -2.267±1.271 | 2.41E-05 |
| cg14784653 | 10 | 13545008  | BEND7     | 1.701±0.281  | 1.319±0.594  | 2.41E-05 |
| cg12445208 | 19 | 56916205  | ZNF583    | 0.577±0.241  | 0.881±0.465  | 2.42E-05 |
| cg13974531 | 16 | 31228444  | PYDC1     | -1.764±0.269 | -1.412±0.543 | 2.42E-05 |
| cg20500081 | 7  | 100185177 | FBXO24    | 2.002±0.241  | 1.617±0.612  | 2.44E-05 |
| cg15747595 | 8  | 98289880  | TSPYL5    | -1.835±0.415 | -1.153±1.09  | 2.44E-05 |
| cg02358761 | 2  | 197036780 | STK17B    | -4.028±0.458 | -4.378±0.404 | 2.44E-05 |
| cg02500392 | 6  | 138539372 | PBOV1     | 2.022±0.377  | 1.549±0.723  | 2.46E-05 |
| cg02704907 | 6  | 27116113  | HIST1H2BK | 1.156±0.339  | 0.753±0.609  | 2.46E-05 |
| cg12428416 | 13 | 20717597  | GJA3      | 2.383±0.374  | 1.955±0.642  | 2.46E-05 |
| cg12532500 | 13 | 33859636  | STARD13   | -3.737±0.437 | -3.323±0.575 | 2.48E-05 |
| cg13184872 | 22 | 44319719  | PNPLA3    | -2.77±0.36   | -2.332±0.667 | 2.48E-05 |
| cg17788682 | 15 | 80697029  | ARNT2     | -4.697±0.867 | -3.837±1.222 | 2.48E-05 |
| cg01880569 | 16 | 82660328  | CDH13     | -0.204±0.261 | 0.234±0.702  | 2.50E-05 |
| cg19168338 | 16 | 4465731   | CORO7     | -2.579±0.368 | -1.939±1.03  | 2.50E-05 |
| cg08367223 | 19 | 41255304  | C19orf54  | 0.784±0.372  | 0.338±0.675  | 2.51E-05 |
| cg07638935 | 10 | 102821427 | KAZALD1   | -2.412±0.471 | -2.911±0.728 | 2.52E-05 |
| cg12053284 | 18 | 40857256  | SYT4      | -4.641±0.472 | -4.03±0.943  | 2.52E-05 |
| cg07804582 | 16 | 49407186  | C16orf78  | 2.063±0.32   | 1.451±0.992  | 2.53E-05 |
| cg12148919 | 6  | 128841705 | PTPRK     | -3.74±0.601  | -3.125±0.887 | 2.53E-05 |
| cg13980719 | 2  | 217725560 | TNP1      | 0.12±0.296   | -0.434±0.898 | 2.54E-05 |
| cg16584573 | 10 | 103535637 | FGF8      | -4.955±0.822 | -4.088±1.266 | 2.54E-05 |
| cg16614500 | 11 | 694704    | TMEM80    | -3.263±0.491 | -3.793±0.78  | 2.54E-05 |
| cg14014613 | 17 | 3196049   | OR3A1     | 2.068±0.267  | 1.573±0.802  | 2.57E-05 |
| cg17558126 | 1  | 206680250 | RASSF5    | -1.984±0.52  | -2.617±0.964 | 2.57E-05 |
| cg02972551 | 2  | 86668068  | KDM3A     | -3.963±0.229 | -4.14±0.208  | 2.57E-05 |
| cg23887102 | 6  | 132891034 | TAAR6     | 0.748±0.267  | 1.209±0.735  | 2.59E-05 |
| cg00412772 | 19 | 38794845  | C19orf33  | 0.894±0.274  | 0.449±0.713  | 2.59E-05 |
| cg16540259 | 10 | 75572220  | NDST2     | 2.274±0.223  | 1.973±0.468  | 2.59E-05 |
| cg11536940 | 8  | 97658076  | CPQ       | -2.311±0.43  | -2.968±1.045 | 2.59E-05 |
| cg09513026 | 5  | 137419242 | WNT8A     | 2.345±0.181  | 2.138±0.311  | 2.60E-05 |
| cg05799317 | 6  | 165723796 | C6orf118  | 2.805±0.27   | 2.351±0.728  | 2.60E-05 |
| cg05564266 | 6  | 118973597 | CEP85L    | 1.531±0.464  | 1.943±0.554  | 2.61E-05 |
| cg27100123 | 18 | 61636779  | SERPINB8  | 2.042±0.297  | 2.452±0.643  | 2.61E-05 |
| cg19511844 | 17 | 38084119  | ORMDL3    | -3.504±0.484 | -2.975±0.784 | 2.62E-05 |
| cg08191915 | 11 | 124481614 | PANX3     | 1.002±0.172  | 0.551±0.747  | 2.63E-05 |
| cg00278366 | 12 | 110940287 | RAD9B     | -0.266±0.221 | -0.692±0.694 | 2.63E-05 |
| cg15134649 | 16 | 56659336  | MT1E      | -4.977±0.428 | -4.055±1.51  | 2.63E-05 |
| cg23051598 | 16 | 28834567  | ATXN2L    | -0.721±0.466 | -0.31±0.55   | 2.64E-05 |
| cg06899329 | 19 | 19627922  | NDUFA13   | 2.469±0.516  | 2.011±0.614  | 2.64E-05 |
| cg20688340 | 10 | 127464237 | MMP21     | 2.963±0.298  | 2.658±0.442  | 2.66E-05 |
| cg04588079 | 12 | 13153012  | HEBP1     | -5.264±0.572 | -4.715±0.774 | 2.66E-05 |
| cg17605084 | 12 | 54891491  | NCKAP1L   | 0.078±0.334  | -0.47±0.88   | 2.67E-05 |
| cg06238491 | 19 | 54876446  | LAIR1     | -0.702±0.329 | -0.295±0.623 | 2.67E-05 |
| cg05156613 | 9  | 111618129 | ACTL7B    | 4.431±0.369  | 4.132±0.374  | 2.68E-05 |
| cg12274479 | 1  | 22264515  | HSPG2     | 2.082±0.402  | 2.472±0.549  | 2.70E-05 |
| cg11065385 | 12 | 568798    | B4GALNT3  | -3.677±0.446 | -4.077±0.544 | 2.70E-05 |
| cg08341874 | 17 | 4689655   | VMO1      | -3.133±0.348 | -2.393±1.215 | 2.71E-05 |
| cg16772207 | 20 | 62795807  | MYT1      | 2.675±0.295  | 1.952±1.195  | 2.72E-05 |
| cg06288351 | 20 | 43729897  | KCNS1     | -1.058±0.236 | -0.549±0.835 | 2.73E-05 |
| cg06187947 | 2  | 189157042 | GULP1     | -3.085±0.456 | -2.571±0.773 | 2.73E-05 |
| cg15383087 | 19 | 36910144  | ZFP82     | -0.113±0.21  | 0.258±0.595  | 2.74E-05 |
| cg10746737 | 6  | 32498604  | HLA-DRB5  | 2.212±0.489  | 1.731±0.686  | 2.74E-05 |
| cg09230173 | 9  | 70971359  | PGM5      | -2.365±0.464 | -1.936±0.593 | 2.74E-05 |
| cg08508325 | 11 | 3079039   | CARS      | -2.952±0.424 | -2.489±0.688 | 2.74E-05 |
| cg00668685 | 12 | 56624552  | SLC39A5   | 2.792±0.273  | 2.519±0.392  | 2.74E-05 |
| cg24101359 | 6  | 42928495  | GNMT      | -3.812±0.678 | -3.147±0.948 | 2.74E-05 |
| cg01757745 | 10 | 134755601 | TTC40     | -0.443±0.284 | -0.083±0.557 | 2.75E-05 |
| cg23472215 | 1  | 110282815 | GSTM3     | -5.506±1.084 | -4.393±1.617 | 2.75E-05 |
| cg00459975 | 8  | 28749099  | HMBOX1    | -4.46±0.475  | -3.989±0.675 | 2.76E-05 |
| cg01946574 | 18 | 7568186   | PTPRM     | -3.521±0.441 | -3.082±0.629 | 2.76E-05 |
| cg05146762 | 7  | 73868174  | GTF2IRD1  | -4.073±0.295 | -3.773±0.435 | 2.77E-05 |
| cg15262984 | 7  | 43965648  | URGCP     | -4.32±0.616  | -4.803±0.585 | 2.77E-05 |

|            |    |           |                   |              |              |          |
|------------|----|-----------|-------------------|--------------|--------------|----------|
| cg19297232 | 16 | 68483021  | <i>SMPD3</i>      | -0.053±0.321 | 0.466±0.835  | 2.77E-05 |
| cg25677709 | 5  | 149900459 | <i>NDST1</i>      | 1.965±0.171  | 2.152±0.278  | 2.78E-05 |
| cg17560332 | 2  | 198651303 | <i>BOLL</i>       | -2.285±0.566 | -1.573±1.099 | 2.79E-05 |
| cg16332577 | 17 | 37886349  | <i>MIEN1</i>      | -2.614±0.321 | -2.936±0.463 | 2.79E-05 |
| cg13619915 | 3  | 164914437 | <i>SLITRK3</i>    | -4.488±0.45  | -3.836±1.034 | 2.79E-05 |
| cg09298289 | 5  | 68485754  | <i>CENPH</i>      | -4.889±0.457 | -5.275±0.504 | 2.80E-05 |
| cg27159719 | 8  | 133772742 | <i>TMEM71</i>     | -0.683±0.338 | -1.313±1.025 | 2.81E-05 |
| cg01892727 | 3  | 3221728   | <i>CRBN</i>       | -2.241±0.38  | -2.58±0.459  | 2.81E-05 |
| cg17607231 | 2  | 231090329 | <i>SP140</i>      | 0.692±0.368  | 0.211±0.75   | 2.82E-05 |
| cg15020645 | 5  | 112073769 | <i>APC</i>        | -2.859±0.418 | -1.868±1.639 | 2.82E-05 |
| cg00986320 | 5  | 156695551 | <i>CYFIP2</i>     | 2.321±0.31   | 1.952±0.563  | 2.82E-05 |
| cg04329382 | 22 | 46480891  | <i>MIRLET7BHG</i> | -0.742±0.333 | -0.089±1.069 | 2.83E-05 |
| cg18399321 | 22 | 39853590  | <i>MGAT3</i>      | -5.33±0.493  | -4.373±1.565 | 2.84E-05 |
| cg00186954 | 11 | 8933980   | <i>AKIP1</i>      | 0.724±0.349  | 1.091±0.532  | 2.86E-05 |
| cg14898892 | 4  | 77356180  | <i>SHROOM3</i>    | -0.492±0.33  | -0.95±0.721  | 2.87E-05 |
| cg10676060 | 9  | 135546789 | <i>DDX31</i>      | -1.638±0.259 | -1.309±0.511 | 2.87E-05 |
| cg14376424 | 5  | 156592780 | <i>FAM71B</i>     | 3.949±0.43   | 3.238±1.147  | 2.87E-05 |
| cg08096010 | 2  | 234216562 | <i>SAG</i>        | 1.893±0.26   | 2.143±0.353  | 2.88E-05 |
| cg18286698 | 9  | 74763873  | <i>GDA</i>        | 2.04±0.235   | 1.659±0.614  | 2.88E-05 |
| cg06533629 | 7  | 130419370 | <i>KLF14</i>      | -3.318±0.518 | -2.426±1.446 | 2.89E-05 |
| cg10634424 | 12 | 91506893  | <i>LUM</i>        | 0.617±0.28   | 0.186±0.683  | 2.89E-05 |
| cg17813891 | 14 | 100532036 | <i>EVL</i>        | 0.762±0.344  | 0.155±0.986  | 2.90E-05 |
| cg20895028 | 20 | 58533443  | <i>CDH26</i>      | 1.901±0.348  | 1.293±0.986  | 2.91E-05 |
| cg19125606 | 1  | 230850299 | <i>AGT</i>        | -0.083±0.33  | 0.301±0.584  | 2.92E-05 |
| cg01528948 | 4  | 100242624 | <i>ADH1B</i>      | -1.897±0.388 | -1.471±0.63  | 2.93E-05 |
| cg21279865 | 17 | 18430908  | <i>FAM106A</i>    | 2.042±0.233  | 1.698±0.547  | 2.93E-05 |
| cg12741420 | 6  | 392131    | <i>IRF4</i>       | -4.26±0.403  | -3.371±1.468 | 2.93E-05 |
| cg11733245 | 10 | 6104312   | <i>IL2RA</i>      | 1.258±0.42   | 0.71±0.855   | 2.93E-05 |
| cg08614201 | 1  | 145715134 | <i>CD160</i>      | 2.229±0.321  | 2.538±0.439  | 2.93E-05 |
| cg13823136 | 1  | 77333138  | <i>ST6GALNAC5</i> | -5.376±0.452 | -4.743±1     | 2.95E-05 |
| cg21503093 | 16 | 10674468  | <i>EMP2</i>       | -5.574±0.626 | -4.917±0.967 | 2.96E-05 |
| cg01693350 | 11 | 32452187  | <i>WT1</i>        | -0.243±0.427 | 0.302±0.848  | 2.98E-05 |
| cg01566170 | 1  | 223899746 | <i>CAPN2</i>      | 0.333±0.307  | -0.103±0.693 | 2.99E-05 |
| cg16178491 | 12 | 101603996 | <i>SLC5A8</i>     | -4.343±0.485 | -3.749±0.916 | 3.01E-05 |
| cg17296078 | 10 | 99259721  | <i>UBTD1</i>      | -2.441±0.52  | -1.924±0.747 | 3.04E-05 |
| cg05965402 | 4  | 25235416  | <i>PI4K2B</i>     | -3.829±0.283 | -4.054±0.279 | 3.05E-05 |
| cg26845278 | 1  | 16763671  | <i>SPATA21</i>    | 1.809±0.263  | 1.507±0.459  | 3.06E-05 |
| cg14973995 | 4  | 2935692   | <i>MFSD10</i>     | -0.879±0.4   | -0.193±1.116 | 3.07E-05 |
| cg10936230 | 15 | 55582890  | <i>RAB27A</i>     | -3.679±0.416 | -3.372±0.35  | 3.07E-05 |
| cg16345226 | 19 | 16771394  | <i>SMIM7</i>      | -2.733±0.37  | -3.045±0.412 | 3.09E-05 |
| cg17778867 | 21 | 46032026  | <i>KRTAP10-8</i>  | 2.26±0.308   | 1.688±0.936  | 3.09E-05 |
| cg04618528 | 17 | 39645876  | <i>KRT36</i>      | 2.778±0.284  | 2.51±0.38    | 3.12E-05 |
| cg02915544 | 11 | 89392829  | <i>FOLH1B</i>     | 0.937±0.314  | 0.372±0.924  | 3.16E-05 |
| cg13319175 | 1  | 19746564  | <i>CAPZB</i>      | 1.14±0.25    | 1.492±0.561  | 3.17E-05 |
| cg01980222 | 6  | 41130917  | <i>TREM2</i>      | -0.192±0.151 | 0.153±0.574  | 3.17E-05 |
| cg07359545 | 22 | 19711327  | <i>GP1BB</i>      | 0.118±0.198  | -0.198±0.513 | 3.17E-05 |
| cg13590277 | 5  | 150019496 | <i>SYNPO</i>      | -1.562±0.338 | -1.22±0.501  | 3.18E-05 |
| cg03389133 | 22 | 37608611  | <i>SSTR3</i>      | -0.091±0.198 | 0.209±0.482  | 3.19E-05 |
| cg07038400 | 3  | 135684163 | <i>PPP2R3A</i>    | -1.744±0.454 | -1.235±0.771 | 3.20E-05 |
| cg23888423 | 2  | 242254170 | <i>42615</i>      | -4.868±0.437 | -5.198±0.388 | 3.21E-05 |
| cg07618900 | 12 | 70093350  | <i>BEST3</i>      | -0.392±0.29  | -0.734±0.526 | 3.21E-05 |
| cg10447080 | 6  | 76203225  | <i>FILIP1</i>     | -2.179±0.391 | -1.605±0.919 | 3.22E-05 |
| cg05668853 | 17 | 27044169  | <i>RAB34</i>      | -0.112±0.185 | -0.449±0.554 | 3.23E-05 |
| cg00823148 | 2  | 209012295 | <i>CRYGB</i>      | 1.467±0.285  | 1.101±0.573  | 3.25E-05 |
| cg09312149 | 5  | 114516420 | <i>TRIM36</i>     | -0.658±0.178 | -0.213±0.746 | 3.25E-05 |
| cg00544557 | 21 | 39578742  | <i>DSCR10</i>     | 3.084±0.328  | 2.778±0.431  | 3.27E-05 |
| cg21207436 | 14 | 74815316  | <i>VRTN</i>       | 0.492±0.255  | 0.823±0.52   | 3.27E-05 |
| cg23627134 | 2  | 143886375 | <i>ARHGAP15</i>   | 0.347±0.324  | -0.069±0.652 | 3.27E-05 |
| cg01192952 | 19 | 40195142  | <i>LGALS14</i>    | 0.267±0.333  | 0.678±0.639  | 3.28E-05 |
| cg24659201 | 2  | 133173718 | <i>GPR39</i>      | -3.51±0.516  | -3.036±0.664 | 3.28E-05 |
| cg16506346 | 17 | 3302176   | <i>OR1E1</i>      | 1.845±0.293  | 1.389±0.725  | 3.29E-05 |
| cg10194829 | 8  | 21900177  | <i>FGF17</i>      | -2.112±0.411 | -1.757±0.477 | 3.29E-05 |
| cg04377282 | 10 | 72201417  | <i>NODAL</i>      | -1.11±0.227  | -1.424±0.5   | 3.30E-05 |
| cg02831604 | 15 | 76628725  | <i>ISL2</i>       | -1.823±0.319 | -1.228±0.979 | 3.30E-05 |
| cg19781053 | 15 | 30114912  | <i>TJP1</i>       | -3.876±0.52  | -3.397±0.669 | 3.31E-05 |
| cg17775713 | 3  | 133465469 | <i>TF</i>         | -0.255±0.15  | -0.026±0.369 | 3.32E-05 |
| cg02516189 | 9  | 139268092 | <i>CARD9</i>      | -0.965±0.296 | -0.538±0.683 | 3.33E-05 |
| cg19063972 | 13 | 95364908  | <i>SOX21</i>      | -4.313±0.638 | -3.482±1.308 | 3.33E-05 |
| cg18389810 | 14 | 21498887  | <i>TPPP2</i>      | 2.885±0.379  | 2.427±0.709  | 3.33E-05 |
| cg04409427 | 21 | 35736023  | <i>KCNE2</i>      | 2.471±0.297  | 2.158±0.465  | 3.34E-05 |

|            |    |           |            |              |              |          |
|------------|----|-----------|------------|--------------|--------------|----------|
| cg05093686 | 13 | 36050788  | MAB21L1    | -0.922±0.32  | -0.406±0.839 | 3.35E-05 |
| cg04001802 | 10 | 15085279  | OLAH       | 0.878±0.361  | 0.399±0.751  | 3.35E-05 |
| cg27000831 | 17 | 32645748  | CCL8       | 1.282±0.338  | 0.789±0.791  | 3.35E-05 |
| cg18396533 | 10 | 82116208  | DYDC1      | -1.381±0.23  | -0.938±0.732 | 3.37E-05 |
| cg01733599 | 15 | 58723851  | LIPC       | 2.265±0.296  | 1.766±0.814  | 3.38E-05 |
| cg10845200 | 10 | 135150485 | CALY       | -6.263±0.639 | -5.261±1.625 | 3.38E-05 |
| cg19850348 | 15 | 55880997  | PYGO1      | -4.47±0.607  | -3.946±0.708 | 3.38E-05 |
| cg00133909 | 15 | 73977201  | CD276      | -3.739±0.428 | -3.402±0.421 | 3.39E-05 |
| cg08775230 | 11 | 111789493 | C11orf52   | -0.054±0.318 | -0.509±0.729 | 3.39E-05 |
| cg04443324 | 5  | 150948306 | FAT2       | 3.226±0.228  | 2.922±0.483  | 3.40E-05 |
| cg21991396 | 1  | 247581417 | NLRP3      | 1.925±0.342  | 1.294±1.041  | 3.43E-05 |
| cg06392589 | 3  | 136676846 | IL20RB     | 2.06±0.266   | 2.412±0.556  | 3.43E-05 |
| cg23665568 | 1  | 85745053  | 0          | 1.125±0.344  | 0.647±0.764  | 3.45E-05 |
| cg00754617 | 19 | 49109288  | SPACA4     | 0.48±0.296   | 0.803±0.486  | 3.45E-05 |
| cg07560096 | 11 | 86383182  | ME3        | -3.985±0.3   | -3.662±0.486 | 3.46E-05 |
| cg08235271 | 1  | 82266030  | LPHN2      | -4.329±0.613 | -3.793±0.732 | 3.46E-05 |
| cg13877465 | 17 | 47074670  | IGF2BP1    | -4.431±0.545 | -3.67±1.216  | 3.50E-05 |
| cg25416372 | 19 | 10628014  | S1PR5      | -4.535±0.453 | -4.083±0.661 | 3.50E-05 |
| cg17356181 | 14 | 50999707  | ATL1       | -4.998±0.42  | -5.34±0.443  | 3.51E-05 |
| cg24105685 | 9  | 95298969  | ECM2       | 0.673±0.258  | 0.963±0.434  | 3.51E-05 |
| cg02248540 | 6  | 27776308  | HIST1H2AI  | -4.374±0.44  | -3.842±0.828 | 3.53E-05 |
| cg00842351 | 9  | 71789653  | TJP2       | -1.118±0.493 | -0.362±1.223 | 3.53E-05 |
| cg10742801 | 10 | 135161047 | PRAP1      | -1.195±0.36  | -0.766±0.666 | 3.55E-05 |
| cg18963171 | 21 | 43442940  | ZNF295-AS1 | 0.81±0.302   | 0.417±0.622  | 3.57E-05 |
| cg04684516 | 5  | 121647858 | SNCAIP     | -3.399±1.031 | -2.563±1.08  | 3.58E-05 |
| cg19690101 | 2  | 39104195  | MORN2      | 1.699±0.344  | 2.155±0.724  | 3.59E-05 |
| cg04743650 | 1  | 101185070 | VCAM1      | -0.523±0.313 | -0.072±0.718 | 3.60E-05 |
| cg05860890 | 8  | 110986870 | KCNV1      | -3.51±0.372  | -2.916±0.968 | 3.61E-05 |
| cg01199721 | 12 | 120632764 | GCN1L1     | -4.634±0.391 | -4.946±0.397 | 3.61E-05 |
| cg16925486 | 9  | 19380496  | RPS6       | -4.702±0.432 | -5.06±0.469  | 3.61E-05 |
| cg02157083 | 11 | 116662800 | APOA5      | 1.737±0.237  | 1.364±0.608  | 3.62E-05 |
| cg13265789 | 4  | 96470584  | UNC5C      | -3.54±0.469  | -2.896±1.029 | 3.63E-05 |
| cg18988395 | 9  | 4152606   | GLIS3      | 0.945±0.3    | 0.526±0.667  | 3.65E-05 |
| cg06852652 | 10 | 96442031  | CYP2C18    | 2.263±0.214  | 1.857±0.673  | 3.65E-05 |
| cg01074640 | 9  | 21228142  | IFNA17     | 1.912±0.29   | 1.497±0.668  | 3.67E-05 |
| cg10057218 | 17 | 38074149  | GSDMB      | 2.588±0.297  | 2.227±0.564  | 3.69E-05 |
| cg11170179 | 19 | 51522767  | KLK10      | -3.386±0.401 | -2.951±0.658 | 3.69E-05 |
| cg09144422 | 16 | 68056595  | DUS2L      | -4.922±0.405 | -4.374±0.874 | 3.70E-05 |
| cg01214209 | 1  | 38258995  | MANEAL     | 0.81±0.213   | 1.149±0.555  | 3.71E-05 |
| cg23337382 | 4  | 22517965  | GPR125     | -3.723±0.646 | -3.159±0.773 | 3.73E-05 |
| cg01400401 | 19 | 4769531   | MIR7-3HG   | -1.619±0.346 | -1.216±0.623 | 3.74E-05 |
| cg18242139 | 1  | 50574837  | ELAVL4     | 2.566±0.238  | 2.145±0.696  | 3.74E-05 |
| cg23901896 | 1  | 201976446 | 0          | 1.388±0.292  | 0.844±0.901  | 3.76E-05 |
| cg20406482 | 17 | 40333521  | KCNH4      | -2.156±0.357 | -1.454±1.17  | 3.77E-05 |
| cg03491478 | 11 | 45906914  | MAPK8IP1   | -2.492±0.258 | -2.049±0.73  | 3.77E-05 |
| cg26815229 | 1  | 60392933  | CYP2J2     | -2.673±0.432 | -3.049±0.515 | 3.78E-05 |
| cg22736323 | 4  | 55095529  | PDGFRA     | -1.764±0.294 | -1.238±0.87  | 3.80E-05 |
| cg11270633 | 19 | 39736956  | IFNL3      | 0.366±0.315  | -0.042±0.647 | 3.82E-05 |
| cg02255004 | 4  | 80748660  | PCAT4      | 1.533±0.224  | 1.105±0.712  | 3.83E-05 |
| cg10866709 | 8  | 11561361  | GATA4      | -3.499±0.252 | -3.125±0.608 | 3.84E-05 |
| cg06141025 | 12 | 21757466  | GYS2       | 0.27±0.231   | 0.665±0.652  | 3.87E-05 |
| cg01413516 | 19 | 17932328  | INSL3      | 1.843±0.418  | 2.34±0.774   | 3.87E-05 |
| cg23006204 | 9  | 130700866 | DPM2       | -0.398±0.27  | 0.021±0.684  | 3.88E-05 |
| cg15903395 | 2  | 88824153  | TEX37      | 1.55±0.319   | 1.249±0.432  | 3.89E-05 |
| cg14724613 | 7  | 86273429  | GRM3       | -4.335±0.32  | -3.935±0.632 | 3.89E-05 |
| cg06034822 | 1  | 161016081 | USF1       | -2.169±0.37  | -2.459±0.368 | 3.89E-05 |
| cg22325572 | 1  | 111416181 | CD53       | 0.184±0.381  | -0.351±0.862 | 3.92E-05 |
| cg01618660 | 9  | 100882376 | TRIM14     | 2.919±0.334  | 2.511±0.64   | 3.93E-05 |
| cg06776256 | 12 | 13043728  | GPRC5A     | -1.712±0.239 | -2.007±0.466 | 3.95E-05 |
| cg02580606 | 17 | 39526726  | KRT33B     | 2.202±0.217  | 1.903±0.482  | 3.97E-05 |
| cg00436282 | 4  | 70861449  | STATH      | 2.352±0.373  | 1.93±0.653   | 4.03E-05 |
| cg11964474 | 17 | 41278655  | NBR2       | 2.333±0.37   | 1.821±0.824  | 4.03E-05 |
| cg00929606 | 7  | 99680280  | ZNF3       | -1.323±0.292 | -1.571±0.337 | 4.04E-05 |
| cg03682712 | 15 | 74219307  | LOXL1      | -1.873±0.619 | -1.35±0.706  | 4.04E-05 |
| cg19502744 | 2  | 31805915  | SRD5A2     | -1.911±0.413 | -1.313±0.972 | 4.05E-05 |
| cg10481417 | 15 | 75018528  | CYP1A1     | -6.059±0.512 | -5.561±0.73  | 4.05E-05 |
| cg05449607 | 6  | 111279612 | GTF3C6     | -3.132±0.372 | -3.529±0.603 | 4.06E-05 |
| cg25894551 | 11 | 117699851 | FXFD2      | 1.38±0.307   | 1.013±0.576  | 4.06E-05 |
| cg02629257 | 17 | 19271627  | B9D1       | 2.508±0.285  | 2.098±0.664  | 4.06E-05 |
| cg20664201 | 12 | 57849270  | INHBE      | 0.465±0.223  | 0.847±0.632  | 4.07E-05 |

|            |    |           |           |              |              |          |
|------------|----|-----------|-----------|--------------|--------------|----------|
| cg03044435 | 4  | 1144077   | 0         | 2.094±0.209  | 1.693±0.672  | 4.07E-05 |
| cg02317907 | 1  | 68515788  | DIRAS3    | 0.823±0.159  | 0.558±0.437  | 4.08E-05 |
| cg20731798 | 11 | 36616365  | C11orf74  | -4.812±0.429 | -4.405±0.59  | 4.08E-05 |
| cg26384034 | 6  | 84744055  | MRAP2     | -4.308±0.335 | -3.85±0.737  | 4.08E-05 |
| cg10872209 | 10 | 104475308 | SFXN2     | -1.391±0.332 | -1.035±0.541 | 4.12E-05 |
| cg04511534 | 17 | 4463371   | GGT6      | 1.282±0.277  | 0.822±0.761  | 4.15E-05 |
| cg06983551 | 2  | 111435583 | BUB1      | -2.901±0.278 | -2.648±0.359 | 4.16E-05 |
| cg27324619 | 22 | 31518860  | INPP5J    | 0.085±0.244  | -0.344±0.712 | 4.18E-05 |
| cg22084611 | 20 | 46414934  | SULF2     | -1.809±0.272 | -1.35±0.761  | 4.18E-05 |
| cg18738906 | 12 | 6483739   | SCNN1A    | 1.805±0.303  | 1.197±1.02   | 4.21E-05 |
| cg02046532 | 20 | 207858    | DEFB129   | 0.963±0.317  | 0.494±0.766  | 4.24E-05 |
| cg10994430 | 9  | 112542080 | PALM2     | -3.243±0.323 | -2.904±0.513 | 4.24E-05 |
| cg05621401 | 10 | 43572065  | RET       | -3.794±0.785 | -2.973±1.243 | 4.26E-05 |
| cg15754084 | 12 | 7343020   | PEX5      | -1.281±0.369 | -0.796±0.778 | 4.27E-05 |
| cg11009736 | 2  | 119699682 | MARCO     | -0.218±0.27  | -0.741±0.877 | 4.28E-05 |
| cg18884741 | 7  | 66204797  | RABGEF1   | 1.618±0.358  | 0.973±1.075  | 4.28E-05 |
| cg05055150 | 19 | 35783292  | MAG       | 1.113±0.23   | 0.771±0.56   | 4.28E-05 |
| cg08062469 | 17 | 26926627  | SPAG5-AS1 | -4.728±0.619 | -5.18±0.528  | 4.28E-05 |
| cg17267493 | 17 | 7460485   | TNFSF13   | 1.624±0.229  | 2.009±0.638  | 4.30E-05 |
| cg03792653 | 20 | 36661448  | TTI1      | -2.97±0.476  | -3.396±0.601 | 4.31E-05 |
| cg06960698 | 13 | 103054846 | FGF14     | -2.712±0.317 | -2.252±0.749 | 4.32E-05 |
| cg08901867 | 17 | 46871042  | TLL6      | 1.918±0.37   | 1.431±0.782  | 4.34E-05 |
| cg04577715 | 5  | 147211181 | SPINK1    | 3.566±0.199  | 3.223±0.57   | 4.35E-05 |
| cg21387281 | 20 | 61435439  | OGFR      | 0.872±0.19   | 1.202±0.549  | 4.35E-05 |
| cg26041297 | 11 | 62009811  | SCGB1D2   | -0.484±0.226 | -0.766±0.448 | 4.37E-05 |
| cg24385322 | 5  | 141017773 | RELL2     | -4.935±0.398 | -4.328±0.998 | 4.39E-05 |
| cg25577842 | 11 | 32459760  | WT1-AS    | -3.718±0.585 | -3.098±0.944 | 4.40E-05 |
| cg18919097 | 3  | 161090798 | SPTSSB    | -1.341±0.336 | -0.857±0.79  | 4.41E-05 |
| cg12340144 | 3  | 38388808  | XYLB      | -1.663±0.244 | -2.046±0.633 | 4.41E-05 |
| cg14197923 | 4  | 81187906  | FGF5      | -4.962±0.506 | -4.303±1.056 | 4.44E-05 |
| cg07369274 | 3  | 58200599  | 0         | -0.608±0.377 | -1.078±0.749 | 4.44E-05 |
| cg10334928 | 14 | 81865007  | STON2     | 2.425±0.278  | 1.938±0.813  | 4.45E-05 |
| cg22189019 | 19 | 640346    | FGF22     | 0.406±0.307  | -0.108±0.855 | 4.47E-05 |
| cg02861781 | 13 | 20767498  | GJB2      | -5.197±0.474 | -4.681±0.794 | 4.47E-05 |
| cg21682902 | 12 | 96390960  | HAL       | 2.339±0.283  | 2.606±0.389  | 4.50E-05 |
| cg00945507 | 7  | 54827677  | SEC61G    | -2.228±0.463 | -2.675±0.659 | 4.50E-05 |
| cg01726767 | 12 | 48965123  | LALBA     | 1.21±0.3     | 0.732±0.79   | 4.50E-05 |
| cg19229991 | 12 | 18242549  | RERGL     | 2.113±0.249  | 1.803±0.494  | 4.55E-05 |
| cg01530101 | 11 | 2891098   | KCNQ1DN   | 0.639±0.223  | 0.912±0.434  | 4.56E-05 |
| cg14580567 | 4  | 145567271 | HHIP-AS1  | -3.291±0.611 | -2.687±0.899 | 4.56E-05 |
| cg10215884 | 5  | 87564247  | TMEM161B  | -3.184±0.394 | -3.52±0.464  | 4.56E-05 |
| cg19703610 | 11 | 117667737 | DSCAML1   | -3.369±0.338 | -2.78±0.984  | 4.59E-05 |
| cg02192965 | 2  | 44502740  | SLC3A1    | 1.41±0.312   | 0.904±0.839  | 4.61E-05 |
| cg22197787 | 1  | 211306986 | KCNH1     | -5.141±0.483 | -4.593±0.856 | 4.64E-05 |
| cg05535113 | 16 | 71559579  | CHST4     | -0.501±0.333 | 0.02±0.862   | 4.67E-05 |
| cg21750589 | 6  | 28321301  | ZKSCAN3   | 0.38±0.393   | -0.163±0.876 | 4.70E-05 |
| cg05449414 | 4  | 467983    | ABCA11P   | -4.114±0.371 | -3.81±0.406  | 4.70E-05 |
| cg26344532 | 13 | 28494174  | PDX1      | -3.379±0.629 | -2.515±1.405 | 4.70E-05 |
| cg25882056 | 22 | 50311056  | ALG12     | 2.281±0.323  | 1.999±0.396  | 4.71E-05 |
| cg04428453 | 16 | 20420652  | ACSM5     | 2.956±0.233  | 2.515±0.742  | 4.73E-05 |
| cg22368262 | 10 | 71390173  | C10orf35  | -2.845±0.5   | -2.272±0.898 | 4.75E-05 |
| cg09632136 | 11 | 114165661 | NNMT      | -1.217±0.312 | -0.783±0.707 | 4.75E-05 |
| cg25104030 | 10 | 43761841  | RASGEF1A  | -4.042±0.349 | -4.307±0.33  | 4.76E-05 |
| cg16466334 | 11 | 102714358 | MMP3      | 1.827±0.235  | 1.344±0.819  | 4.79E-05 |
| cg04996020 | 7  | 107443898 | SLC26A3   | 0.804±0.289  | 0.32±0.799   | 4.79E-05 |
| cg07471052 | 17 | 73996245  | CDK3      | 2.709±0.45   | 3.337±1.026  | 4.81E-05 |
| cg21070087 | 7  | 43351538  | HECW1     | 2.96±0.304   | 2.323±1.082  | 4.81E-05 |
| cg00463202 | 13 | 114107710 | ADPRHL1   | 2.256±0.236  | 2.465±0.296  | 4.82E-05 |
| cg24670151 | 17 | 73256558  | GGA3      | -1.179±0.438 | -0.743±0.607 | 4.82E-05 |
| cg18971671 | 19 | 49401721  | TULP2     | 2.164±0.24   | 1.904±0.402  | 4.83E-05 |
| cg19335327 | 19 | 57351642  | PEG3      | 0.011±0.171  | 0.271±0.429  | 4.85E-05 |
| cg13226172 | 9  | 34589381  | CNTFR     | -5.231±0.491 | -4.67±0.88   | 4.86E-05 |
| cg06001166 | 16 | 2004052   | RPL3L     | 2.777±0.267  | 3.085±0.484  | 4.86E-05 |
| cg18464137 | 7  | 83278504  | SEMA3E    | -3.617±0.398 | -2.881±1.241 | 4.87E-05 |
| cg16907075 | 1  | 156022875 | UBQLN4    | -3.17±0.534  | -3.641±0.666 | 4.90E-05 |
| cg17541922 | 11 | 86511813  | PRSS23    | -4.951±0.691 | -4.396±0.735 | 4.90E-05 |
| cg07551659 | 15 | 57669165  | CGNL1     | -2.843±0.549 | -2.367±0.666 | 4.90E-05 |
| cg05221264 | 1  | 15783513  | CELA2A    | 3.221±0.278  | 2.876±0.553  | 4.92E-05 |
| cg03770548 | 14 | 23525040  | CDH24     | 1.849±0.162  | 1.495±0.605  | 4.93E-05 |
| cg20637307 | 2  | 213403960 | ERBB4     | -4.428±0.642 | -3.727±1.086 | 4.95E-05 |

|            |    |           |               |              |              |          |
|------------|----|-----------|---------------|--------------|--------------|----------|
| cg08554114 | 14 | 53163204  | ERO1L         | 1.573±0.23   | 1.832±0.405  | 4.95E-05 |
| cg25764464 | 12 | 19282832  | PLEKHA5       | -4.66±0.501  | -4.241±0.571 | 4.96E-05 |
| cg12585943 | 6  | 32121368  | PPT2          | -1.347±0.297 | -1.788±0.728 | 5.00E-05 |
| cg06564900 | 2  | 164592568 | FIGN          | -2.995±0.418 | -2.567±0.65  | 5.00E-05 |
| cg13383491 | 7  | 112727701 | GPR85         | -0.948±0.398 | -0.437±0.815 | 5.01E-05 |
| cg25463409 | 4  | 46848264  | COX7B2        | 1.078±0.283  | 0.598±0.803  | 5.02E-05 |
| cg09688546 | 4  | 157997363 | GLRB          | -2.284±0.718 | -1.645±0.913 | 5.03E-05 |
| cg07708788 | 3  | 133748311 | SLCO2A1       | -4.777±0.536 | -4.296±0.688 | 5.03E-05 |
| cg09429111 | 9  | 96792562  | PTPDC1        | -4.243±0.351 | -4.53±0.386  | 5.03E-05 |
| cg20225915 | 11 | 805726    | PIDD          | -1.654±0.285 | -1.456±0.221 | 5.05E-05 |
| cg18746357 | 11 | 65429465  | RELA          | 0.349±0.168  | 0.715±0.625  | 5.05E-05 |
| cg22937804 | 2  | 27361879  | C2orf53       | 0.067±0.283  | -0.31±0.612  | 5.05E-05 |
| cg03991512 | 16 | 75150456  | LDHD          | -2.067±0.485 | -1.594±0.706 | 5.06E-05 |
| cg24870391 | 17 | 32612675  | CCL11         | 1.257±0.253  | 0.811±0.752  | 5.07E-05 |
| cg00653387 | 7  | 137028535 | PTN           | -3.24±0.286  | -2.66±0.987  | 5.10E-05 |
| cg10412312 | 12 | 25705861  | IFLTD1        | 1.562±0.307  | 1.124±0.72   | 5.11E-05 |
| cg19241744 | 10 | 73078790  | SLC29A3       | -1.502±0.212 | -1.835±0.553 | 5.12E-05 |
| cg22757447 | 18 | 22006316  | IMPACT        | -3.359±0.44  | -2.817±0.869 | 5.15E-05 |
| cg02945646 | 14 | 24037169  | AP1G2         | -2.305±0.451 | -2.618±0.346 | 5.15E-05 |
| cg02810134 | 20 | 44455922  | TNNC2         | 3.457±0.297  | 3.168±0.433  | 5.16E-05 |
| cg21232015 | 12 | 133424221 | CHFR          | 2.472±0.278  | 2.142±0.525  | 5.20E-05 |
| cg15774495 | 7  | 50861549  | GRB10         | -3.869±0.591 | -3.316±0.813 | 5.20E-05 |
| cg15584813 | 12 | 47219626  | SLC38A4       | -2.086±0.637 | -1.372±1.121 | 5.22E-05 |
| cg26750319 | 11 | 2593960   | KCNQ1         | 5.092±0.38   | 4.619±0.76   | 5.22E-05 |
| cg14702264 | 7  | 66385829  | TMEM248       | -4.176±0.322 | -3.685±0.817 | 5.22E-05 |
| cg18422443 | 12 | 88974386  | KITLG         | -3.699±0.581 | -3.176±0.753 | 5.23E-05 |
| cg03192551 | 17 | 42403152  | SLC25A39      | -2.854±0.535 | -3.384±0.799 | 5.23E-05 |
| cg22152667 | 7  | 97619372  | OCM2          | 3.389±0.287  | 3.701±0.485  | 5.23E-05 |
| cg22533573 | 11 | 32452771  | WT1           | -2.328±0.561 | -1.74±0.905  | 5.24E-05 |
| cg26377677 | 15 | 91412118  | FURIN         | 1.831±0.293  | 1.288±0.92   | 5.25E-05 |
| cg27157038 | 10 | 98063999  | DNTT          | 2.994±0.397  | 2.666±0.446  | 5.25E-05 |
| cg19959519 | 17 | 29422806  | NF1           | -3.454±0.349 | -3.153±0.421 | 5.26E-05 |
| cg16303562 | 8  | 16050333  | MSR1          | -0.406±0.229 | -0.04±0.612  | 5.31E-05 |
| cg02945019 | 1  | 160550488 | CD84          | -0.147±0.288 | -0.623±0.792 | 5.31E-05 |
| cg02828104 | 20 | 48770800  | MEM189-UBE2V1 | -0.889±0.446 | -1.321±0.647 | 5.31E-05 |
| cg16359129 | 1  | 162347752 | C1orf226      | 2.313±0.283  | 2.619±0.476  | 5.31E-05 |
| cg16303453 | 16 | 66879016  | CA7           | -3.337±0.495 | -2.845±0.743 | 5.31E-05 |
| cg26417554 | 3  | 9886232   | RPUSD3        | 0.658±0.29   | 1.031±0.605  | 5.32E-05 |
| cg20775840 | 5  | 151150431 | LOC100652758  | -4.005±0.429 | -3.352±1.087 | 5.33E-05 |
| cg19856444 | 10 | 18241116  | SLC39A12      | 0.349±0.293  | -0.09±0.722  | 5.35E-05 |
| cg19250891 | 1  | 160121412 | ATP1A4        | 2.022±0.189  | 1.872±0.199  | 5.36E-05 |
| cg26713220 | 16 | 15528565  | C16orf45      | -5.306±0.467 | -4.746±0.895 | 5.36E-05 |
| cg17920197 | 19 | 35627220  | LGI4          | 1.771±0.173  | 1.463±0.521  | 5.36E-05 |
| cg05788437 | 3  | 197476880 | FYTD1         | -5.361±0.524 | -4.915±0.622 | 5.37E-05 |
| cg08980578 | 19 | 38811036  | KCNK6         | -3.531±0.407 | -3.037±0.792 | 5.37E-05 |
| cg04551925 | 7  | 30951740  | AQP1          | 0.669±0.244  | 1.246±0.992  | 5.37E-05 |
| cg14600885 | 5  | 150040280 | MYOZ3         | -1.698±0.339 | -2.059±0.56  | 5.37E-05 |
| cg23953396 | 17 | 72427941  | GPRC5C        | -4.617±0.492 | -4.097±0.805 | 5.38E-05 |
| cg23807646 | 6  | 35992685  | SLC26A8       | 1.117±0.284  | 1.541±0.706  | 5.38E-05 |
| cg19292712 | 7  | 123564194 | SPAM1         | 2.543±0.325  | 2.256±0.411  | 5.41E-05 |
| cg27217148 | 10 | 105111158 | PCGF6         | -2.726±0.362 | -2.37±0.536  | 5.42E-05 |
| cg04091078 | 12 | 20848285  | SLCO1C1       | 0.292±0.217  | 0.719±0.729  | 5.43E-05 |
| cg23146358 | 11 | 2905496   | CDKN1C        | -4.826±0.952 | -3.889±1.413 | 5.43E-05 |
| cg12556134 | 20 | 35201610  | TGIF2         | -1.547±0.274 | -0.988±0.955 | 5.44E-05 |
| cg27447599 | 7  | 45927940  | IGFBP1        | -1.621±0.181 | -1.876±0.42  | 5.44E-05 |
| cg19070798 | 22 | 38240558  | MIR658        | -5.386±0.496 | -5.774±0.508 | 5.45E-05 |
| cg19219437 | 3  | 142607715 | PCOLCE2       | -4.481±0.475 | -3.893±0.947 | 5.47E-05 |
| cg02741177 | 4  | 71263061  | PROL1         | 0.604±0.369  | 0.274±0.471  | 5.47E-05 |
| cg25463779 | 12 | 124773236 | FAM101A       | -0.086±0.209 | -0.38±0.484  | 5.49E-05 |
| cg07015629 | 2  | 213403212 | ERBB4         | -3.625±0.555 | -2.993±1     | 5.49E-05 |
| cg23663476 | 16 | 28996449  | LAT           | 0.505±0.267  | 0.915±0.684  | 5.50E-05 |
| cg11897314 | 5  | 119799832 | PRR16         | -4.302±0.451 | -3.602±1.17  | 5.54E-05 |
| cg22775000 | 9  | 103235181 | TMEFF1        | -4.418±0.448 | -3.886±0.852 | 5.55E-05 |
| cg17952262 | 4  | 683240    | MFSD7         | -1.5±0.226   | -1.073±0.727 | 5.55E-05 |
| cg04558553 | 4  | 69960869  | UGT2B7        | 0.761±0.252  | 0.377±0.642  | 5.56E-05 |
| cg15804973 | 6  | 137114513 | MAP3K5        | -1.976±0.407 | -2.301±0.433 | 5.57E-05 |
| cg22655224 | 16 | 56623448  | MT3           | -5.332±0.413 | -4.666±1.12  | 5.57E-05 |
| cg12593411 | 19 | 10213722  | ANGPTL6       | 1.689±0.371  | 1.275±0.652  | 5.59E-05 |
| cg25665528 | 16 | 2260870   | BRICD5        | 1.543±0.272  | 1.8±0.383    | 5.61E-05 |
| cg17761453 | 1  | 153231562 | LOR           | 2.24±0.243   | 1.672±0.979  | 5.62E-05 |

|            |    |           |            |              |              |          |
|------------|----|-----------|------------|--------------|--------------|----------|
| cg20967220 | 6  | 53013647  | GCM1       | 1.778±0.244  | 2.044±0.417  | 5.63E-05 |
| cg24597988 | 1  | 169681749 | SELL       | 1.891±0.333  | 2.145±0.32   | 5.63E-05 |
| cg04785227 | 15 | 32321637  | CHRNA7     | -4.697±0.45  | -4.152±0.878 | 5.65E-05 |
| cg22820108 | 12 | 125003218 | NCOR2      | -0.754±0.283 | -0.388±0.596 | 5.67E-05 |
| cg20295671 | 22 | 22090486  | YPEL1      | -6.204±0.863 | -5.433±1.115 | 5.67E-05 |
| cg15379858 | 8  | 19540466  | CSGALNACT1 | 1.216±0.232  | 0.795±0.715  | 5.68E-05 |
| cg02000005 | 14 | 105953642 | CRIP1      | -3.17±0.391  | -3.738±0.945 | 5.71E-05 |
| cg26646370 | 19 | 4279441   | SHD        | -2.941±0.744 | -2.213±1.101 | 5.72E-05 |
| cg09643186 | 14 | 65409452  | GPX2       | 3.1±0.347    | 2.421±1.163  | 5.73E-05 |
| cg03862760 | 7  | 1609483   | PSMG3      | -0.43±0.156  | -0.65±0.364  | 5.73E-05 |
| cg19410364 | 12 | 121647217 | P2RX4      | 1.461±0.361  | 0.844±1.044  | 5.75E-05 |
| cg02374486 | 10 | 72362809  | PRF1       | 1.387±0.25   | 1.107±0.443  | 5.83E-05 |
| cg21187265 | 1  | 26127185  | SEPN1      | -3.109±0.48  | -2.724±0.517 | 5.83E-05 |
| cg27398547 | 14 | 60952738  | C14orf39   | -0.884±0.691 | -0.236±0.962 | 5.85E-05 |
| cg22416721 | 4  | 88570574  | DMP1       | 0.854±0.304  | 1.308±0.758  | 5.86E-05 |
| cg21547708 | 17 | 71161160  | SSTR2      | -4.19±0.371  | -3.465±1.241 | 5.87E-05 |
| cg15595739 | 17 | 63183451  | RGS9       | 2.291±0.225  | 1.963±0.546  | 5.87E-05 |
| cg10612997 | 2  | 11673928  | GREB1      | 1.423±0.192  | 1.089±0.566  | 5.91E-05 |
| cg19464252 | 16 | 30675233  | FBRS       | 1.814±0.317  | 1.426±0.628  | 5.96E-05 |
| cg24727182 | 4  | 109684250 | ETNPPL     | -4.479±0.413 | -3.897±0.964 | 5.96E-05 |
| cg13500819 | 5  | 138725400 | MZB1       | 1.946±0.354  | 1.507±0.713  | 6.00E-05 |
| cg23495733 | 12 | 39299132  | CPNE8      | -5.426±0.627 | -4.82±0.914  | 6.02E-05 |
| cg12883767 | 12 | 58013109  | SLC26A10   | 0.933±0.242  | 1.275±0.568  | 6.05E-05 |
| cg18847227 | 3  | 4509268   | SUMF1      | -0.19±0.327  | -0.589±0.647 | 6.07E-05 |
| cg05949173 | 2  | 113825882 | IL1F10     | 0.687±0.386  | 1±0.429      | 6.07E-05 |
| cg08657449 | 8  | 105351661 | DCSTAMP    | 2.282±0.41   | 1.738±0.897  | 6.11E-05 |
| cg04144768 | 7  | 50628154  | DDC        | 1.669±0.173  | 1.358±0.531  | 6.14E-05 |
| cg12869240 | 10 | 127569973 | DHX32      | 0.067±0.216  | 0.366±0.496  | 6.15E-05 |
| cg26898336 | 17 | 15244519  | TEKT3      | -3.689±0.765 | -3.054±0.884 | 6.15E-05 |
| cg24710073 | 6  | 170864351 | TBP        | -0.38±0.329  | 0.044±0.694  | 6.16E-05 |
| cg16713808 | 1  | 152388040 | CRNN       | 1.826±0.273  | 1.323±0.861  | 6.19E-05 |
| cg07753583 | 7  | 150020206 | LRRC61     | -2.386±0.464 | -2.869±0.751 | 6.20E-05 |
| cg24147596 | 3  | 160395420 | ARL14      | 1.187±0.249  | 0.726±0.789  | 6.20E-05 |
| cg22419732 | 6  | 116832047 | FAM26E     | 2.031±0.366  | 1.622±0.645  | 6.21E-05 |
| cg05807991 | 4  | 118006808 | TRAM1L1    | -3.373±0.759 | -2.718±0.935 | 6.23E-05 |
| cg13274254 | 2  | 189157566 | GULP1      | -4.12±0.554  | -3.535±0.913 | 6.24E-05 |
| cg16604516 | 3  | 13590419  | FBLN2      | -2.083±0.447 | -1.608±0.744 | 6.25E-05 |
| cg12232463 | 2  | 100926650 | LONRF2     | 0.051±0.278  | 0.429±0.619  | 6.26E-05 |
| cg15083233 | 9  | 112810402 | AKAP2      | -2.87±0.411  | -2.127±1.269 | 6.26E-05 |
| cg15800421 | 17 | 40834743  | CNTNAP1    | -3.501±0.309 | -3.18±0.499  | 6.26E-05 |
| cg14094960 | 7  | 55086890  | EGFR       | -3.968±1.03  | -3.047±1.344 | 6.30E-05 |
| cg02361557 | 1  | 107682963 | NTNG1      | -4.864±0.38  | -4.095±1.326 | 6.32E-05 |
| cg26401870 | 8  | 21882439  | NPM2       | -2.271±0.449 | -1.818±0.696 | 6.35E-05 |
| cg18895813 | 21 | 28339705  | ADAMTS5    | -4.881±0.387 | -4.472±0.639 | 6.36E-05 |
| cg11876012 | 16 | 101686    | POLR3K     | 2.139±0.281  | 1.557±1.006  | 6.38E-05 |
| cg03330058 | 3  | 127392403 | ABTB1      | -0.697±0.379 | -1.089±0.609 | 6.39E-05 |
| cg14839257 | 6  | 167275999 | RPS6KA2    | -6.106±0.574 | -5.528±0.891 | 6.40E-05 |
| cg09212058 | 2  | 37543459  | PRKD3      | 1.979±0.349  | 2.289±0.452  | 6.41E-05 |
| cg04151683 | 9  | 28718459  | LINGO2     | -0.668±0.238 | -1.209±0.94  | 6.45E-05 |
| cg21574400 | 18 | 47088309  | LIPG       | -4.679±0.313 | -4.375±0.464 | 6.46E-05 |
| cg26706003 | 12 | 63546263  | AVPR1A     | -0.795±0.282 | -0.425±0.603 | 6.47E-05 |
| cg17329164 | 6  | 32121259  | PPT2       | -1.06±0.36   | -1.614±0.934 | 6.48E-05 |
| cg20083730 | 16 | 56659724  | MT1E       | -4.459±0.445 | -3.704±1.287 | 6.49E-05 |
| cg05421673 | 17 | 54671575  | NOG        | -3.682±0.318 | -3.274±0.671 | 6.52E-05 |
| cg16689634 | 1  | 47489539  | CYP4X1     | -3.749±0.522 | -3.294±0.657 | 6.60E-05 |
| cg08158289 | 5  | 141302729 | KIAA0141   | -0.649±0.383 | -1.124±0.776 | 6.60E-05 |
| cg08489623 | 7  | 55902220  | 42627      | 0.586±0.347  | 0.117±0.756  | 6.61E-05 |
| cg20496643 | 17 | 34058597  | RASL10B    | -4.446±0.435 | -3.99±0.714  | 6.62E-05 |
| cg12385643 | 2  | 234600149 | UGT1A6     | 2.407±0.255  | 2.048±0.599  | 6.62E-05 |
| cg25608041 | 4  | 37891834  | TBC1D1     | -0.396±0.356 | -0.023±0.585 | 6.64E-05 |
| cg12647587 | 10 | 96954252  | C10orf129  | 2.865±0.347  | 2.596±0.356  | 6.64E-05 |
| cg11745019 | 8  | 108509756 | ANGPT1     | -4.062±0.344 | -3.394±1.153 | 6.64E-05 |
| cg17918239 | 1  | 200379718 | ZNF281     | -2.752±0.547 | -3.168±0.528 | 6.65E-05 |
| cg00407150 | 3  | 42743794  | HHATL      | 1.175±0.174  | 0.83±0.596   | 6.68E-05 |
| cg05067973 | 20 | 360745    | TRIB3      | 3.936±0.253  | 3.64±0.48    | 6.70E-05 |
| cg18983672 | 1  | 47881256  | FOXEO      | 2.103±0.27   | 2.352±0.371  | 6.70E-05 |
| cg07799947 | 2  | 101436171 | NPAS2      | -1.317±0.195 | -1.16±0.213  | 6.71E-05 |
| cg19586576 | 17 | 42906845  | GJC1       | -3.62±0.351  | -2.892±1.261 | 6.71E-05 |
| cg06521852 | 22 | 38141419  | TRIOBP     | -2.47±0.36   | -2.779±0.442 | 6.73E-05 |
| cg19257200 | 22 | 38380983  | SOX10      | 2.381±0.227  | 2.158±0.343  | 6.75E-05 |

|            |    |           |           |              |              |          |
|------------|----|-----------|-----------|--------------|--------------|----------|
| cg04961553 | 4  | 48908469  | OCIAD2    | -5.205±0.414 | -5.54±0.461  | 6.77E-05 |
| cg15182360 | 13 | 61989737  | PCDH20    | -4.041±0.449 | -3.644±0.58  | 6.80E-05 |
| cg12532667 | 4  | 101440020 | EMCN      | 0.04±0.303   | 0.427±0.637  | 6.81E-05 |
| cg26777475 | 7  | 100199952 | PCOLCE    | 0.534±0.311  | 1.066±0.911  | 6.84E-05 |
| cg11815363 | 1  | 233750184 | KCNK1     | -4.231±0.499 | -3.654±0.931 | 6.85E-05 |
| cg04968426 | 15 | 41120711  | PPP1R14D  | 2.916±0.34   | 2.356±0.956  | 6.87E-05 |
| cg14377593 | 7  | 93520183  | TFPI2     | -4.585±0.288 | -3.979±1.052 | 6.87E-05 |
| cg14367014 | 2  | 203735128 | ICA1L     | -0.449±0.388 | -0.064±0.574 | 6.88E-05 |
| cg17994910 | 1  | 42948516  | 0         | -0.241±0.498 | 0.131±0.459  | 6.88E-05 |
| cg06497752 | 20 | 61448534  | COL9A3    | -5.282±0.617 | -4.371±1.537 | 6.91E-05 |
| cg18538812 | 11 | 59614095  | GIF       | 0.415±0.221  | -0.072±0.849 | 6.94E-05 |
| cg00101227 | 1  | 161280266 | MPZ       | 1.413±0.196  | 1.757±0.591  | 6.94E-05 |
| cg20066612 | 1  | 160050948 | KCNJ9     | -0.512±0.3   | -0.927±0.694 | 6.95E-05 |
| cg06353318 | 17 | 72920378  | OTOP2     | -3.078±0.394 | -2.678±0.623 | 6.95E-05 |
| cg21388029 | 2  | 102003306 | CREG2     | -4.256±0.447 | -3.748±0.816 | 6.99E-05 |
| cg01594262 | 19 | 38806145  | YIF1B     | -3.154±0.346 | -2.675±0.8   | 6.99E-05 |
| cg25953146 | 2  | 132558939 | C2orf27B  | 1.853±0.294  | 1.541±0.493  | 7.00E-05 |
| cg22469841 | 3  | 120169368 | FSTL1     | -4.864±0.72  | -4.276±0.819 | 7.00E-05 |
| cg07566050 | 1  | 160174755 | PEA15     | 2.264±0.198  | 1.974±0.489  | 7.01E-05 |
| cg11011938 | 5  | 9545976   | SEMA5A    | -3.366±0.497 | -2.839±0.833 | 7.02E-05 |
| cg17099569 | 2  | 121549866 | 0         | 0.284±0.288  | -0.141±0.703 | 7.03E-05 |
| cg00613255 | 11 | 2182376   | INS       | 2.094±0.321  | 1.647±0.748  | 7.04E-05 |
| cg19485804 | 2  | 233878714 | NGEF      | 1.75±0.291   | 1.371±0.63   | 7.10E-05 |
| cg09736162 | 3  | 48700443  | CELSR3    | -4.221±0.647 | -3.269±1.607 | 7.10E-05 |
| cg07339327 | 11 | 69461109  | CCND1     | 3.447±0.566  | 3.836±0.446  | 7.10E-05 |
| cg08853659 | 3  | 139654245 | CLSTN2    | -4.721±0.462 | -3.933±1.352 | 7.11E-05 |
| cg19409156 | 15 | 48413040  | SLC24A5   | 2.522±0.298  | 2.187±0.539  | 7.11E-05 |
| cg19044630 | 9  | 79521532  | PRUNE2    | -4.334±0.451 | -3.78±0.908  | 7.14E-05 |
| cg09547190 | 9  | 95857577  | C9orf89   | -0.057±0.552 | -0.546±0.718 | 7.16E-05 |
| cg08146221 | 12 | 6875198   | PTMS      | -3.798±0.289 | -3.584±0.272 | 7.20E-05 |
| cg17725968 | 4  | 96761026  | PDHA2     | 2.509±0.36   | 1.896±1.053  | 7.20E-05 |
| cg08709385 | 22 | 22986667  | POM121L1P | 3.583±0.379  | 2.953±1.079  | 7.20E-05 |
| cg26374101 | 9  | 140500813 | ARRDC1    | -3.97±0.328  | -4.25±0.404  | 7.21E-05 |
| cg25771195 | 16 | 58163814  | C16orf80  | 0.134±0.36   | 0.616±0.804  | 7.21E-05 |
| cg26781575 | 2  | 187558534 | FAM171B   | -3.626±0.29  | -3.07±0.964  | 7.22E-05 |
| cg26087862 | 1  | 150602029 | ENSA      | -0.468±0.182 | -0.677±0.338 | 7.23E-05 |
| cg04640913 | 20 | 44880515  | CDH22     | -0.705±0.232 | -1.023±0.532 | 7.23E-05 |
| cg00041575 | 11 | 2322741   | C11orf21  | 0.337±0.419  | -0.193±0.874 | 7.24E-05 |
| cg22692158 | 12 | 11463844  | PRB4      | 2.83±0.227   | 2.524±0.511  | 7.24E-05 |
| cg26831415 | 8  | 16885270  | MICU3     | -5.346±0.632 | -4.722±0.965 | 7.24E-05 |
| cg19423196 | 10 | 82049429  | MAT1A     | -1.414±0.275 | -1.837±0.718 | 7.24E-05 |
| cg04504095 | 6  | 1610688   | FOXC1     | -4.672±0.654 | -4.119±0.792 | 7.24E-05 |
| cg03098643 | 4  | 187644620 | FAT1      | -2.36±0.527  | -1.927±0.607 | 7.26E-05 |
| cg12308275 | 15 | 43558855  | TGM5      | 2.393±0.231  | 2.198±0.28   | 7.26E-05 |
| cg26181372 | 9  | 104198262 | ALDOB     | 1.557±0.251  | 1.224±0.554  | 7.27E-05 |
| cg13726463 | 16 | 31439681  | COX6A2    | 1.959±0.325  | 2.453±0.84   | 7.28E-05 |
| cg13126790 | 6  | 160010346 | 0         | 1.198±0.273  | 0.82±0.635   | 7.30E-05 |
| cg16382322 | 5  | 141061902 | ARAP3     | -4.639±0.603 | -4.139±0.705 | 7.31E-05 |
| cg21065959 | 1  | 152758755 | LCE1E     | 0.648±0.225  | 0.215±0.752  | 7.34E-05 |
| cg21671476 | 20 | 35169609  | MYL9      | -1.751±0.427 | -1.353±0.601 | 7.37E-05 |
| cg07498879 | 22 | 30663041  | OSM       | 1.085±0.301  | 0.652±0.732  | 7.38E-05 |
| cg22621695 | 12 | 68042799  | DYRK2     | -2.159±0.423 | -1.857±0.369 | 7.39E-05 |
| cg25167643 | 7  | 121513538 | PTPRZ1    | -4.084±0.665 | -3.36±1.156  | 7.40E-05 |
| cg18459342 | 8  | 81084056  | TPD52     | -1.969±0.36  | -1.694±0.363 | 7.40E-05 |
| cg13910855 | 6  | 32157485  | PBX2      | -4.715±0.471 | -4.233±0.756 | 7.40E-05 |
| cg25934198 | 9  | 139920781 | C9orf139  | 2.649±0.192  | 2.46±0.291   | 7.40E-05 |
| cg03160135 | 6  | 117586918 | VGLL2     | -2.135±0.254 | -1.633±0.874 | 7.42E-05 |
| cg24678429 | 10 | 129705785 | PTPRE     | -5.213±0.667 | -4.556±1.016 | 7.45E-05 |
| cg27210447 | 1  | 16348849  | CLCNKA    | 2.102±0.241  | 1.814±0.471  | 7.47E-05 |
| cg13434842 | 8  | 11567896  | GATA4     | 0.236±0.299  | 0.553±0.503  | 7.50E-05 |
| cg10770524 | 5  | 69141030  | 0         | -1.654±0.19  | -1.454±0.317 | 7.50E-05 |
| cg20098478 | 12 | 65515862  | WIF1      | 1.565±0.433  | 1.996±0.671  | 7.51E-05 |
| cg11378686 | 6  | 43336278  | ZNF318    | -3.421±0.385 | -3.038±0.595 | 7.53E-05 |
| cg07942995 | 19 | 58546307  | ZSCAN1    | 0.25±0.325   | 0.646±0.635  | 7.56E-05 |
| cg14833160 | 19 | 49457855  | BAX       | -3.644±0.331 | -3.933±0.422 | 7.57E-05 |
| cg04411625 | 14 | 105953462 | CRIP1     | -3.962±0.485 | -4.654±1.17  | 7.63E-05 |
| cg24778383 | 19 | 6590895   | CD70      | -5.527±0.448 | -4.733±1.374 | 7.63E-05 |
| cg09169283 | 17 | 72856452  | GRIN2C    | -3.464±0.284 | -2.987±0.821 | 7.64E-05 |
| cg01639256 | 2  | 70189903  | ASPRV1    | 3.452±0.304  | 3.157±0.455  | 7.68E-05 |
| cg27227797 | 19 | 375831    | THEG      | 0.7±0.212    | 0.974±0.457  | 7.69E-05 |

|            |    |           |           |              |              |          |
|------------|----|-----------|-----------|--------------|--------------|----------|
| cg27650434 | 1  | 40368189  | MYCL      | -3.595±0.251 | -3.856±0.411 | 7.72E-05 |
| cg02202484 | 1  | 152942688 | SPRR4     | 1.387±0.335  | 0.714±1.175  | 7.73E-05 |
| cg23523368 | 1  | 115238494 | AMPD1     | 1.164±0.234  | 0.717±0.771  | 7.74E-05 |
| cg24935900 | 2  | 73340724  | RAB11FIP5 | -4.329±0.282 | -4.535±0.263 | 7.80E-05 |
| cg05628549 | 11 | 6341895   | PRKCDBP   | -3.777±0.487 | -3.022±1.292 | 7.85E-05 |
| cg18858343 | 10 | 72972901  | UNC5B     | -4.615±0.519 | -4.219±0.529 | 7.87E-05 |
| cg22552966 | 17 | 19620595  | SLC47A2   | 4.129±0.394  | 3.755±0.573  | 7.88E-05 |
| cg27069753 | 1  | 22303571  | CELA3B    | 0.602±0.195  | 0.926±0.558  | 7.90E-05 |
| cg26738010 | 18 | 580188    | CETN1     | 2.704±0.362  | 2.36±0.527   | 7.90E-05 |
| cg11320084 | 1  | 185014181 | RNF2      | -2.46±0.263  | -2.173±0.462 | 7.96E-05 |
| cg01585703 | 15 | 40074646  | FSIP1     | -3.934±0.256 | -4.25±0.524  | 7.96E-05 |
| cg23909633 | 1  | 207070539 | IL24      | 2.141±0.33   | 1.814±0.51   | 7.99E-05 |
| cg23681213 | 14 | 74180391  | PNMA1     | -3.573±0.426 | -2.955±1.051 | 7.99E-05 |
| cg01309152 | 21 | 41239771  | PCP4      | 1.94±0.326   | 1.454±0.824  | 8.00E-05 |
| cg08859916 | 10 | 89624102  | KLLN      | -4.177±0.333 | -3.711±0.788 | 8.01E-05 |
| cg06898923 | 10 | 27792905  | RAB18     | -3.862±0.285 | -4.132±0.415 | 8.01E-05 |
| cg22836153 | 5  | 121412702 | LOX       | -4.97±0.468  | -4.548±0.631 | 8.06E-05 |
| cg00988256 | 19 | 11406173  | TSPAN16   | 2.984±0.198  | 2.748±0.39   | 8.06E-05 |
| cg14358743 | 13 | 114568252 | GAS6-AS2  | 3.49±0.259   | 3.115±0.639  | 8.06E-05 |
| cg01103730 | 1  | 207038704 | IL20      | 3.218±0.244  | 2.663±0.98   | 8.11E-05 |
| cg09254939 | 19 | 51520259  | KLK10     | -3.746±0.481 | -2.848±1.567 | 8.15E-05 |
| cg07149772 | 8  | 25314972  | KCTD9     | -4.072±0.411 | -3.748±0.446 | 8.18E-05 |
| cg20811389 | 9  | 99381113  | CDC14B    | -4.114±0.406 | -3.674±0.707 | 8.19E-05 |
| cg03611555 | 14 | 37641600  | SLC25A21  | -4.547±0.599 | -3.923±0.991 | 8.19E-05 |
| cg10061117 | 11 | 121322622 | SORL1     | -5.064±0.36  | -5.374±0.454 | 8.25E-05 |
| cg17036737 | 1  | 145507675 | RBM8A     | -0.271±0.222 | -0.52±0.403  | 8.27E-05 |
| cg00317680 | 8  | 97274070  | PTDSS1    | -3.193±0.534 | -2.818±0.455 | 8.31E-05 |
| cg22799321 | 7  | 93519621  | TFPI2     | -4.29±0.374  | -3.715±0.988 | 8.32E-05 |
| cg23366752 | 15 | 78556502  | DNAJA4    | 4.031±0.553  | 3.164±1.492  | 8.32E-05 |
| cg04132607 | 20 | 61041456  | GATA5     | 2.791±0.335  | 2.282±0.873  | 8.32E-05 |
| cg19346193 | 10 | 127513190 | BCCIP     | 2±0.283      | 1.55±0.775   | 8.32E-05 |
| cg14789259 | 2  | 14773457  | FAM84A    | -2.007±0.367 | -1.528±0.804 | 8.32E-05 |
| cg17252960 | 6  | 19837350  | ID4       | -2.629±0.436 | -2.081±0.914 | 8.38E-05 |
| cg25124030 | 11 | 73498278  | MRPL48    | -0.179±0.331 | -0.508±0.514 | 8.38E-05 |
| cg02433671 | 19 | 11529856  | RGL3      | -4.18±0.45   | -3.794±0.565 | 8.39E-05 |
| cg10719920 | 21 | 46724843  | 0         | 3.473±0.449  | 3.061±0.625  | 8.43E-05 |
| cg19219366 | 11 | 6495536   | TRIM3     | -3.663±0.449 | -3.286±0.545 | 8.44E-05 |
| cg03521113 | 12 | 25204672  | LRMP      | -2.028±0.314 | -1.484±0.945 | 8.46E-05 |
| cg20881888 | 3  | 50383079  | ZMYND10   | -0.176±0.539 | -0.966±1.349 | 8.46E-05 |
| cg10073042 | 22 | 22973200  | 0         | 1.332±0.19   | 1.087±0.412  | 8.46E-05 |
| cg02887841 | 22 | 19744670  | TBX1      | -4.31±0.462  | -3.81±0.808  | 8.47E-05 |
| cg09874752 | 10 | 99531309  | SFRP5     | -4.663±0.564 | -3.955±1.181 | 8.52E-05 |
| cg08752459 | 12 | 10022682  | CLEC2B    | -2.202±0.404 | -2.606±0.63  | 8.52E-05 |
| cg20176532 | 19 | 58458979  | ZNF256    | -4.889±0.501 | -3.88±1.773  | 8.54E-05 |
| cg23408620 | 4  | 187187495 | F11       | 0.71±0.247   | 0.289±0.725  | 8.54E-05 |
| cg22116290 | 16 | 68481968  | SMPD3     | -3.165±0.412 | -2.737±0.683 | 8.55E-05 |
| cg19918758 | 1  | 108508113 | VAV3      | -5.804±0.592 | -4.992±1.377 | 8.55E-05 |
| cg20919133 | 7  | 152134133 | FABP5P3   | -3.984±0.562 | -3.41±0.91   | 8.60E-05 |
| cg00042156 | 10 | 42970842  | LINC00839 | 1.032±0.396  | 0.525±0.851  | 8.64E-05 |
| cg00283535 | 8  | 124749564 | ANXA13    | 0.87±0.351   | 1.281±0.672  | 8.64E-05 |
| cg12820608 | 12 | 53626390  | RARG      | -4.529±0.302 | -4.766±0.327 | 8.65E-05 |
| cg17071957 | 9  | 124029926 | GSN       | -2.216±0.341 | -1.86±0.57   | 8.65E-05 |
| cg21169285 | 5  | 179707665 | MAPK9     | 1.915±0.437  | 2.266±0.488  | 8.71E-05 |
| cg22917487 | 3  | 39322103  | CX3CR1    | 3.136±0.305  | 2.874±0.383  | 8.73E-05 |
| cg07005513 | 11 | 61595956  | FADS2     | -2.946±0.319 | -2.627±0.503 | 8.73E-05 |
| cg18989919 | 3  | 133648584 | C3orf36   | 3.136±0.186  | 2.82±0.551   | 8.80E-05 |
| cg21041127 | 7  | 16922421  | AGR3      | 1.131±0.223  | 0.749±0.66   | 8.83E-05 |
| cg14021073 | 11 | 1410385   | BRSK2     | -4.141±0.378 | -3.495±1.124 | 8.83E-05 |
| cg21494776 | 19 | 10397780  | ICAM4     | -2.539±0.425 | -2.029±0.847 | 8.84E-05 |
| cg25201363 | 4  | 3534845   | LRPAP1    | -0.104±0.213 | 0.25±0.616   | 8.85E-05 |
| cg01043831 | 4  | 37962205  | PTTG2     | 1.163±0.287  | 0.768±0.671  | 8.85E-05 |
| cg10716163 | 19 | 1355910   | MUM1      | -4.016±0.467 | -3.649±0.508 | 8.86E-05 |
| cg20645065 | 1  | 21836138  | ALPL      | -3.892±0.472 | -3.171±1.243 | 8.93E-05 |
| cg19286986 | 12 | 6931017   | GPR162    | -4.7±0.519   | -4.321±0.488 | 8.94E-05 |
| cg20678353 | 15 | 38988560  | C1orf53   | -0.103±0.352 | -0.545±0.741 | 8.98E-05 |
| cg04748010 | 7  | 39046213  | POU6F2    | 0.385±0.329  | -0.132±0.894 | 9.03E-05 |
| cg19428336 | 4  | 187645448 | FAT1      | -3.479±0.426 | -3.068±0.64  | 9.05E-05 |
| cg25494227 | 12 | 10331614  | TMEM52B   | -0.501±0.286 | -0.144±0.599 | 9.09E-05 |
| cg18184219 | 1  | 243388524 | CEP170    | 1.668±0.4    | 1.948±0.34   | 9.11E-05 |
| cg11346450 | 2  | 234638043 | UGT1A3    | 2.056±0.211  | 1.701±0.62   | 9.11E-05 |

|            |    |           |                  |              |              |          |
|------------|----|-----------|------------------|--------------|--------------|----------|
| cg26096837 | 11 | 69519974  | <i>FGF19</i>     | -1.904±0.277 | -1.281±1.107 | 9.15E-05 |
| cg15517609 | 19 | 38924045  | <i>RYR1</i>      | -1.772±0.391 | -1.339±0.708 | 9.15E-05 |
| cg22407504 | 11 | 1243090   | <i>MUC5B</i>     | 1.544±0.324  | 1.94±0.661   | 9.15E-05 |
| cg01291404 | 12 | 48397872  | <i>COL2A1</i>    | -4.424±0.433 | -3.906±0.861 | 9.16E-05 |
| cg27256309 | 19 | 49220485  | <i>MAMSTR</i>    | -0.216±0.277 | 0.15±0.619   | 9.17E-05 |
| cg04019407 | 17 | 47046304  | <i>GIP</i>       | 1.044±0.336  | 0.596±0.76   | 9.20E-05 |
| cg17010112 | 4  | 77227123  | <i>STBD1</i>     | -3.484±0.429 | -3.084±0.617 | 9.22E-05 |
| cg03945800 | 16 | 4165515   | <i>ADCY9</i>     | -3.145±0.473 | -2.733±0.614 | 9.22E-05 |
| cg24198840 | 2  | 233897561 | <i>NEU2</i>      | 3.402±0.35   | 3.028±0.605  | 9.23E-05 |
| cg23686014 | 7  | 93519924  | <i>TFPI2</i>     | -4.271±0.304 | -3.691±1.021 | 9.26E-05 |
| cg01941619 | 18 | 29770081  | <i>MEP1B</i>     | 0.865±0.329  | 0.495±0.608  | 9.27E-05 |
| cg22045288 | 10 | 134258421 | <i>C10orf91</i>  | 0.73±0.288   | 0.409±0.526  | 9.31E-05 |
| cg08784110 | 6  | 160328002 | <i>MAS1</i>      | 1.314±0.254  | 0.976±0.573  | 9.32E-05 |
| cg24545967 | 9  | 130540941 | <i>SH2D3C</i>    | -0.368±0.24  | -0.015±0.608 | 9.34E-05 |
| cg15870225 | 12 | 56617083  | <i>NABP2</i>     | 2.909±0.349  | 2.523±0.632  | 9.34E-05 |
| cg03302287 | 12 | 33049650  | <i>PKP2</i>      | -4.9±0.551   | -4.222±1.135 | 9.35E-05 |
| cg22639768 | 10 | 61122535  | <i>FAM13C</i>    | -4.588±0.375 | -4.215±0.592 | 9.37E-05 |
| cg11460029 | 17 | 7608747   | <i>EFNB3</i>     | -3.86±0.247  | -3.409±0.793 | 9.41E-05 |
| cg17238009 | 10 | 77542582  | <i>C10orf11</i>  | 2.017±0.356  | 2.352±0.522  | 9.41E-05 |
| cg08284598 | 20 | 3218145   | <i>SLC4A11</i>   | 1.968±0.312  | 2.319±0.575  | 9.44E-05 |
| cg00830029 | 12 | 2943902   | <i>NRIP2</i>     | -0.792±0.368 | -0.377±0.683 | 9.44E-05 |
| cg03005261 | 4  | 110480828 | <i>CCDC109B</i>  | -1.845±0.436 | -2.374±0.883 | 9.46E-05 |
| cg23433607 | 20 | 5892338   | <i>CHGB</i>      | -4.679±0.539 | -5.178±0.769 | 9.48E-05 |
| cg05243874 | 15 | 84898042  | <i>LOC388152</i> | -4.017±0.279 | -4.257±0.356 | 9.49E-05 |
| cg26221631 | 11 | 129245988 | <i>BARX2</i>     | -4.926±0.545 | -4.36±0.91   | 9.50E-05 |
| cg18908499 | 1  | 247712237 | <i>GCSAML</i>    | 0.969±0.344  | 0.51±0.78    | 9.52E-05 |
| cg26838900 | 3  | 194090132 | <i>LRRC15</i>    | 1.105±0.233  | 0.778±0.559  | 9.52E-05 |
| cg19839588 | 6  | 42419466  | <i>TRERF1</i>    | -4.249±0.263 | -3.711±0.954 | 9.55E-05 |
| cg13982505 | 2  | 233642094 | <i>KCNJ13</i>    | 0.986±0.423  | 1.339±0.517  | 9.58E-05 |
| cg27088655 | 16 | 755793    | <i>FBXL16</i>    | -5.603±0.59  | -4.895±1.182 | 9.58E-05 |
| cg00714377 | 20 | 35274715  | <i>SLA2</i>      | -1.428±0.303 | -0.803±1.109 | 9.59E-05 |
| cg09119665 | 14 | 74181285  | <i>PNMA1</i>     | -4.805±0.439 | -5.216±0.638 | 9.59E-05 |
| cg13968061 | 1  | 159557257 | <i>APCS</i>      | 1.584±0.284  | 1.062±0.919  | 9.64E-05 |
| cg13084335 | 11 | 111782670 | <i>CRYAB</i>     | -2.854±0.483 | -2.383±0.742 | 9.64E-05 |
| cg12902039 | 15 | 28344412  | <i>OCA2</i>      | -1.351±0.202 | -1.715±0.641 | 9.68E-05 |
| cg05135156 | 1  | 184355420 | <i>C1orf21</i>   | -1.848±0.478 | -2.324±0.756 | 9.68E-05 |
| cg16608348 | 1  | 214724481 | <i>PTPN14</i>    | -4.878±0.643 | -4.275±0.937 | 9.68E-05 |
| cg09492887 | 7  | 103085978 | <i>SLC26A5</i>   | -3.132±0.406 | -2.497±1.105 | 9.69E-05 |
| cg18626709 | 3  | 189838693 | <i>LEPREL1</i>   | -4.584±0.66  | -4.009±0.863 | 9.70E-05 |
| cg11507178 | 11 | 118781515 | <i>BCL9L</i>     | -1.899±0.388 | -1.587±0.445 | 9.76E-05 |
| cg13588354 | 20 | 54823303  | <i>MC3R</i>      | -1.984±0.412 | -2.354±0.565 | 9.82E-05 |
| cg04583874 | 8  | 144242268 | <i>LY6H</i>      | -1.688±0.388 | -1.256±0.71  | 9.82E-05 |
| cg02845923 | 12 | 82750988  | <i>CCDC59</i>    | 2.41±0.342   | 2.681±0.382  | 9.85E-05 |
| cg07981495 | 6  | 87804765  | <i>CGA</i>       | 2.102±0.261  | 1.691±0.716  | 9.86E-05 |
| cg01337047 | 18 | 28897113  | <i>DSG1</i>      | -1.527±0.427 | -1.093±0.688 | 9.87E-05 |
| cg04301614 | 4  | 37585993  | <i>C4orf19</i>   | -0.253±0.257 | -0.669±0.727 | 9.88E-05 |
| cg07349094 | 2  | 100759014 | <i>AFF3</i>      | 1.244±0.392  | 0.741±0.853  | 9.91E-05 |
| cg12242338 | 3  | 140397089 | <i>TRIM42</i>    | 1.52±0.2     | 1.024±0.889  | 9.92E-05 |
| cg02916816 | 14 | 24047021  | <i>JPH4</i>      | -3.08±0.481  | -2.504±0.963 | 9.97E-05 |
| cg12927617 | 9  | 117084602 | <i>ORM1</i>      | -0.866±0.335 | -1.25±0.637  | 1.00E-04 |
| cg22730560 | 15 | 101835345 | <i>SNRPA1</i>    | -0.744±0.203 | -0.567±0.266 | 1.00E-04 |
| cg20161179 | 4  | 4863282   | <i>MSX1</i>      | -2.69±0.375  | -2.105±1.019 | 1.01E-04 |
| cg13297865 | 6  | 80657415  | <i>ELOVL4</i>    | -4.148±0.577 | -3.098±1.855 | 1.01E-04 |
| cg07059360 | 8  | 22102032  | <i>POLR3D</i>    | -1.037±0.207 | -0.725±0.543 | 1.01E-04 |
| cg07651242 | 7  | 45614720  | <i>ADCY1</i>     | -3.273±0.445 | -2.54±1.286  | 1.01E-04 |
| cg11388238 | 2  | 201375098 | <i>KCTD18</i>    | -4.062±0.284 | -4.294±0.336 | 1.01E-04 |
| cg25775449 | 14 | 24781881  | <i>LTB4R</i>     | 0.968±0.473  | 1.304±0.427  | 1.01E-04 |
| cg08818984 | 5  | 142814827 | <i>NR3C1</i>     | -0.046±0.365 | -0.687±1.13  | 1.02E-04 |
| cg06507244 | 10 | 127569494 | <i>DHX32</i>     | 1.677±0.248  | 1.954±0.457  | 1.03E-04 |
| cg12029639 | 13 | 36050993  | <i>NBEA</i>      | -0.966±0.374 | -0.487±0.814 | 1.03E-04 |
| cg19883905 | 18 | 12254024  | <i>CIDEA</i>     | -3.284±0.46  | -2.75±0.891  | 1.03E-04 |
| cg18843688 | 13 | 45563253  | <i>NUFIP1</i>    | -1.296±0.305 | -1.64±0.568  | 1.03E-04 |
| cg17922226 | 7  | 143013614 | <i>CLCN1</i>     | 0.848±0.463  | 1.337±0.797  | 1.03E-04 |
| cg15821095 | 3  | 51428079  | <i>RBM15B</i>    | 1.982±0.252  | 1.523±0.814  | 1.04E-04 |
| cg09879099 | 18 | 55102210  | <i>ONECUT2</i>   | -4.346±0.366 | -3.873±0.805 | 1.04E-04 |
| cg11221132 | 22 | 42540342  | <i>CYP2D7P1</i>  | 1.896±0.253  | 1.664±0.359  | 1.04E-04 |
| cg09118625 | 1  | 68512971  | <i>DIRAS3</i>    | 1.355±0.331  | 1.716±0.593  | 1.04E-04 |
| cg08724517 | 4  | 156298204 | <i>MAP9</i>      | -3.405±0.433 | -3.757±0.51  | 1.05E-04 |
| cg19427610 | 12 | 65515031  | <i>WIF1</i>      | -3.258±0.504 | -2.771±0.769 | 1.05E-04 |
| cg11393453 | 18 | 30050326  | <i>GAREM</i>     | -4.879±0.511 | -4.352±0.853 | 1.05E-04 |

|            |    |           |                  |              |              |          |
|------------|----|-----------|------------------|--------------|--------------|----------|
| cg18638496 | 4  | 81187198  | <i>FGF5</i>      | -3.19±0.3    | -2.577±1.094 | 1.07E-04 |
| cg06210526 | 19 | 41619850  | <i>CYP2F1</i>    | 2.336±0.253  | 1.936±0.701  | 1.07E-04 |
| cg21016177 | 17 | 74100207  | <i>EXOC7</i>     | -4.113±0.425 | -3.746±0.552 | 1.07E-04 |
| cg12439773 | 11 | 62752119  | <i>SLC22A6</i>   | 1.543±0.222  | 1.198±0.603  | 1.07E-04 |
| cg04969808 | 3  | 13922158  | <i>WNT7A</i>     | -3.523±0.324 | -3.068±0.786 | 1.07E-04 |
| cg11984608 | 3  | 190105555 | <i>CLDN16</i>    | 1.413±0.23   | 0.923±0.878  | 1.08E-04 |
| cg01216369 | 3  | 172859022 | <i>SPATA16</i>   | 3.516±0.462  | 2.902±1.053  | 1.08E-04 |
| cg23404467 | 19 | 55235973  | <i>KIR3DL3</i>   | 2.655±0.267  | 2.338±0.533  | 1.08E-04 |
| cg24027342 | 11 | 108131609 | <i>ATM</i>       | 1.963±0.655  | 1.512±0.554  | 1.08E-04 |
| cg15830940 | 2  | 217278069 | <i>SMARCAL1</i>  | -0.084±0.308 | 0.266±0.583  | 1.08E-04 |
| cg14633704 | 9  | 99065350  | <i>HSD17B3</i>   | 2.207±0.428  | 2.554±0.505  | 1.08E-04 |
| cg16127845 | 7  | 1126423   | <i>GPER</i>      | -4.173±0.493 | -4.575±0.584 | 1.08E-04 |
| cg02583151 | 14 | 61116211  | <i>SIX1</i>      | -3.853±0.353 | -3.471±0.629 | 1.08E-04 |
| cg01305625 | 5  | 131593812 | <i>PDLIM4</i>    | 1.041±0.226  | 0.652±0.688  | 1.09E-04 |
| cg15105703 | 15 | 45421860  | <i>DUOXA1</i>    | -3.166±0.423 | -2.804±0.543 | 1.09E-04 |
| cg22156632 | 2  | 219725069 | <i>WNT6</i>      | -1.777±0.24  | -1.409±0.645 | 1.09E-04 |
| cg12762799 | 12 | 8693542   | <i>CLEC4E</i>    | -0.545±0.22  | -0.177±0.649 | 1.10E-04 |
| cg10720654 | 9  | 33676517  | <i>PTENP1-AS</i> | -1.194±0.298 | -0.854±0.562 | 1.10E-04 |
| cg07823935 | 2  | 183902842 | <i>NCKAP1</i>    | -4.963±0.683 | -4.292±1.074 | 1.10E-04 |
| cg13560436 | 5  | 56248587  | <i>MIER3</i>     | -2.145±0.394 | -1.752±0.631 | 1.11E-04 |
| cg25229172 | 12 | 96336121  | <i>CCDC38</i>    | -2.926±0.451 | -2.368±0.946 | 1.11E-04 |
| cg02885771 | 6  | 144163654 | <i>LTV1</i>      | 0.309±0.309  | 0.775±0.814  | 1.11E-04 |
| cg10938286 | 20 | 23806999  | <i>CS22</i>      | 3.422±0.297  | 2.947±0.836  | 1.12E-04 |
| cg15783027 | 8  | 145669353 | <i>TONSL</i>     | -4.072±0.33  | -3.491±1.03  | 1.12E-04 |
| cg08377000 | 4  | 90033921  | <i>TIGD2</i>     | 1.137±0.252  | 1.538±0.704  | 1.12E-04 |
| cg02019333 | 3  | 118892215 | <i>UPK1B</i>     | -0.906±0.293 | -0.42±0.857  | 1.12E-04 |
| cg19889584 | 16 | 29625696  | <i>SLC7A5P1</i>  | 2.164±0.271  | 2.373±0.293  | 1.12E-04 |
| cg07460665 | 17 | 46908912  | <i>CALCOCO2</i>  | -2.823±0.368 | -2.544±0.385 | 1.13E-04 |
| cg21665000 | 17 | 12569135  | <i>MYOCD</i>     | -3.987±0.394 | -3.537±0.752 | 1.13E-04 |
| cg04329454 | 6  | 33561099  | <i>LINC00336</i> | 0.102±0.17   | -0.324±0.773 | 1.13E-04 |
| cg08493463 | 4  | 185139078 | <i>ENPP6</i>     | 0.526±0.183  | 0.803±0.486  | 1.13E-04 |
| cg23656380 | 20 | 60877581  | <i>ADRM1</i>     | -4.787±0.434 | -5.151±0.541 | 1.13E-04 |
| cg25013053 | 17 | 33475031  | <i>UNC45B</i>    | 1.544±0.219  | 1.748±0.32   | 1.14E-04 |
| cg06746171 | 5  | 151138551 | <i>ATOX1</i>     | -4.586±0.533 | -3.987±0.998 | 1.14E-04 |
| cg21660392 | 17 | 66950545  | <i>ABCA8</i>     | 0.337±0.3    | -0.149±0.858 | 1.14E-04 |
| cg08521225 | 18 | 29171977  | <i>TTR</i>       | 2.242±0.207  | 1.862±0.678  | 1.14E-04 |
| cg13998904 | 3  | 140396803 | <i>TRIM42</i>    | 2.142±0.295  | 1.719±0.737  | 1.15E-04 |
| cg11512771 | 1  | 150479487 | <i>ECM1</i>      | 3.092±0.257  | 2.561±0.955  | 1.15E-04 |
| cg15557833 | 4  | 128886857 | <i>MFSD8</i>     | -2.5±0.477   | -2.17±0.412  | 1.15E-04 |
| cg07432969 | 2  | 241569557 | <i>GPR35</i>     | 3.864±0.368  | 3.452±0.687  | 1.15E-04 |
| cg02125271 | 15 | 25200406  | <i>SNRPN</i>     | 0.314±0.201  | 0.005±0.542  | 1.15E-04 |
| cg25156443 | 10 | 99531929  | <i>SFRP5</i>     | -1.997±0.503 | -1.569±0.645 | 1.16E-04 |
| cg08210616 | 3  | 44754195  | <i>ZNF502</i>    | -3.799±0.45  | -3.276±0.882 | 1.16E-04 |
| cg14561282 | 4  | 175839468 | <i>ADAM29</i>    | 1.362±0.228  | 1.619±0.429  | 1.16E-04 |
| cg25020204 | 9  | 136500234 | <i>DBH</i>       | 1.08±0.185   | 0.789±0.511  | 1.17E-04 |
| cg10585462 | 4  | 71091866  | <i>FDCSP</i>     | 1.471±0.343  | 1.046±0.716  | 1.17E-04 |
| cg10334385 | 2  | 11272868  | <i>C2orf50</i>   | -2.99±0.236  | -3.218±0.363 | 1.18E-04 |
| cg11332994 | 5  | 69345141  | <i>SMN2</i>      | 0.074±0.189  | -0.131±0.341 | 1.18E-04 |
| cg23179168 | 8  | 127570165 | <i>FAM84B</i>    | -4.541±0.35  | -4.186±0.577 | 1.18E-04 |
| cg02552572 | 16 | 56597746  | <i>MT4</i>       | 1.437±0.221  | 1.119±0.551  | 1.18E-04 |
| cg27094076 | 7  | 50132541  | <i>ZPBP</i>      | -3.32±0.544  | -2.719±1.003 | 1.18E-04 |
| cg16408970 | 10 | 28965584  | <i>BAMBI</i>     | -2.394±0.219 | -1.873±0.944 | 1.19E-04 |
| cg20551517 | 17 | 47046292  | <i>GIP</i>       | 2.109±0.22   | 1.606±0.911  | 1.19E-04 |
| cg05461841 | 16 | 2879944   | <i>ZG16B</i>     | -0.929±0.324 | -0.413±0.912 | 1.19E-04 |
| cg09343150 | 11 | 64579163  | <i>MEN1</i>      | 2.522±0.263  | 2.214±0.52   | 1.19E-04 |
| cg14204735 | 17 | 61524304  | <i>CYB5P1</i>    | -3.722±0.455 | -4.212±0.81  | 1.19E-04 |
| cg05942970 | 10 | 133955527 | <i>JAKMIP3</i>   | 3.213±0.436  | 2.637±0.993  | 1.20E-04 |
| cg19560758 | 1  | 8086721   | <i>ERRFI1</i>    | -3.164±0.497 | -2.695±0.743 | 1.20E-04 |
| cg12955583 | 10 | 134974048 | <i>KNDC1</i>     | -5.335±0.815 | -4.545±1.265 | 1.20E-04 |
| cg00554682 | 2  | 185463132 | <i>ZNF804A</i>   | -4.088±0.254 | -3.651±0.778 | 1.20E-04 |
| cg05185584 | 11 | 17410182  | <i>KCNJ11</i>    | 0.724±0.3    | 0.403±0.532  | 1.20E-04 |
| cg26615830 | 4  | 4861330   | <i>MSX1</i>      | -5.111±0.614 | -4.217±1.565 | 1.20E-04 |
| cg24107142 | 2  | 75060355  | <i>HK2</i>       | 1.486±0.36   | 1.035±0.772  | 1.20E-04 |
| cg11768416 | 12 | 91348697  | <i>CCER1</i>     | 4.85±0.474   | 4.503±0.468  | 1.20E-04 |
| cg07112154 | 17 | 41985074  | <i>MPP2</i>      | -2.536±0.235 | -2.161±0.662 | 1.20E-04 |
| cg00081975 | 17 | 48712370  | <i>ABCC3</i>     | -4.007±0.628 | -3.409±0.953 | 1.20E-04 |
| cg26757673 | 22 | 37545423  | <i>IL2RB</i>     | 2.354±0.48   | 1.836±0.86   | 1.20E-04 |
| cg19118812 | 7  | 37488438  | <i>ELMO1</i>     | -5.081±0.6   | -3.951±2.026 | 1.20E-04 |
| cg25315362 | 3  | 116164576 | <i>LSAMP</i>     | -1.967±0.322 | -1.4±1.011   | 1.20E-04 |
| cg03716999 | 1  | 6265802   | <i>RNF207</i>    | -3.523±0.384 | -3.855±0.506 | 1.20E-04 |

|            |    |           |             |              |              |          |
|------------|----|-----------|-------------|--------------|--------------|----------|
| cg18345635 | 17 | 80186080  | SLC16A3     | 0.028±0.279  | -0.335±0.626 | 1.20E-04 |
| cg01346152 | 1  | 12678761  | DHRS3       | -3.323±0.41  | -3.659±0.496 | 1.21E-04 |
| cg13289321 | 7  | 150884003 | ASB10       | 1.748±0.215  | 2.022±0.471  | 1.21E-04 |
| cg25250998 | 10 | 106028373 | MIR4482-1   | -4.152±0.375 | -4.553±0.665 | 1.21E-04 |
| cg03316864 | 19 | 17906309  | B3GNT3      | -2.556±0.399 | -2.112±0.741 | 1.21E-04 |
| cg18765542 | 11 | 46354101  | DGKZ        | -2.003±0.448 | -1.523±0.794 | 1.21E-04 |
| cg04391540 | 19 | 48048129  | ZNF541      | 0.496±0.274  | 0.871±0.652  | 1.22E-04 |
| cg10106284 | 2  | 16847988  | FAM49A      | -0.932±0.276 | -0.578±0.61  | 1.22E-04 |
| cg19403346 | 4  | 183066597 | MGC45800    | -2.793±0.449 | -2.19±1.045  | 1.23E-04 |
| cg15727249 | 11 | 116693415 | APOA4       | 0.647±0.269  | 0.311±0.576  | 1.24E-04 |
| cg12285118 | 10 | 14816973  | FAM107B     | 1.512±0.355  | 1.178±0.532  | 1.25E-04 |
| cg06353948 | 9  | 135231016 | SETX        | 2.559±0.481  | 2.066±0.809  | 1.25E-04 |
| cg19814116 | 1  | 6086448   | KCNAB2      | -1.064±0.739 | -1.785±1.163 | 1.25E-04 |
| cg03399971 | 12 | 57828847  | INHBC       | 2.529±0.225  | 2.726±0.303  | 1.25E-04 |
| cg15334028 | 19 | 10829162  | MIR638      | -3.277±0.465 | -2.958±0.399 | 1.25E-04 |
| cg17749520 | 17 | 42466567  | ITGA2B      | 3.333±0.175  | 3.158±0.286  | 1.26E-04 |
| cg14366598 | 14 | 23841754  | IL25        | -0.359±0.238 | -0.809±0.809 | 1.27E-04 |
| cg20202438 | 1  | 11907986  | NPPA        | 0.751±0.172  | 1.022±0.482  | 1.27E-04 |
| cg16970232 | 5  | 112073433 | APC         | -3.231±0.546 | -2.007±2.225 | 1.27E-04 |
| cg27494383 | 15 | 41805868  | LTK         | -4.74±0.524  | -4.131±1.032 | 1.27E-04 |
| cg22339278 | 19 | 36347276  | KIRREL2     | -3.717±0.458 | -3.338±0.566 | 1.27E-04 |
| cg22867063 | 11 | 7041549   | ZNF214      | -4.068±0.414 | -3.691±0.592 | 1.28E-04 |
| cg06666486 | 7  | 6099044   | EIF2AK1     | -3.008±0.699 | -3.574±0.832 | 1.28E-04 |
| cg19101893 | 1  | 43283862  | CCDC23      | 1.661±0.26   | 1.87±0.306   | 1.28E-04 |
| cg14407437 | 1  | 31845923  | FABP3       | -2.574±0.314 | -1.882±1.257 | 1.28E-04 |
| cg06069731 | 6  | 26043791  | HIST1H2BB   | -4.396±0.416 | -3.817±1.013 | 1.28E-04 |
| cg07955887 | 18 | 8717926   | SOGA2       | 2.768±0.284  | 2.537±0.34   | 1.28E-04 |
| cg04189838 | 10 | 96523347  | CYP2C19     | 2.531±0.216  | 2.303±0.376  | 1.29E-04 |
| cg13284426 | 5  | 176732122 | PRELID1     | 1.668±0.216  | 1.422±0.417  | 1.29E-04 |
| cg20513206 | 19 | 40855502  | C19orf47    | 0.403±0.348  | -0.008±0.699 | 1.29E-04 |
| cg00816620 | 1  | 185127501 | SWT1        | -1.881±0.36  | -1.429±0.77  | 1.29E-04 |
| cg00566759 | 18 | 28682345  | DSC2        | -4.04±0.423  | -3.606±0.714 | 1.29E-04 |
| cg24794531 | 3  | 142443837 | TRPC1       | -3.681±0.449 | -3.127±0.95  | 1.29E-04 |
| cg05795313 | 12 | 48745136  | ZNF641      | -3.06±0.445  | -2.655±0.637 | 1.29E-04 |
| cg12627583 | 2  | 201450731 | AOX1        | -4.274±0.362 | -3.817±0.787 | 1.30E-04 |
| cg00690280 | 20 | 44332733  | WFDC10B     | 1.401±0.273  | 1.052±0.602  | 1.30E-04 |
| cg06093279 | 8  | 17658292  | MTUS1       | -3.969±0.272 | -3.721±0.389 | 1.30E-04 |
| cg08285151 | 7  | 18534872  | HDAC9       | -0.828±0.379 | -0.343±0.832 | 1.30E-04 |
| cg16778903 | 15 | 72612567  | CELF6       | -4.538±0.435 | -4.862±0.448 | 1.30E-04 |
| cg03883348 | 19 | 45843826  | KLC3        | -1.891±0.363 | -2.237±0.554 | 1.30E-04 |
| cg00405677 | 5  | 153858102 | HAND1       | -3.587±0.427 | -3.021±0.984 | 1.30E-04 |
| cg10506318 | 5  | 60239580  | ERCC8       | 0.386±0.273  | 0.687±0.506  | 1.31E-04 |
| cg00186701 | 8  | 98290510  | TSPYL5      | -1.239±0.403 | -1.853±1.088 | 1.31E-04 |
| cg09542291 | 1  | 152850992 | SMCP        | 2.409±0.28   | 1.88±0.956   | 1.31E-04 |
| cg14543592 | 19 | 50936703  | MYBPC2      | 1.785±0.409  | 2.133±0.528  | 1.31E-04 |
| cg15923513 | 2  | 160654168 | CD302       | -3.577±0.505 | -3.12±0.716  | 1.31E-04 |
| cg26431343 | 22 | 32808764  | RTCB        | -0.109±0.277 | -0.471±0.63  | 1.31E-04 |
| cg05413282 | 9  | 33796088  | PRSS3       | 1.115±0.222  | 0.603±0.933  | 1.32E-04 |
| cg13169373 | 21 | 27542843  | APP         | -4.28±0.616  | -3.791±0.711 | 1.32E-04 |
| cg08274234 | 7  | 83277971  | SEMA3E      | -3.731±0.49  | -3.173±0.944 | 1.32E-04 |
| cg25085950 | 21 | 27108830  | ATP5J       | -2.979±0.46  | -2.557±0.668 | 1.32E-04 |
| cg22476084 | 11 | 117747874 | FXYP6-FXYD2 | -3.152±0.501 | -2.743±0.608 | 1.32E-04 |
| cg14115346 | 6  | 3118207   | BPHL        | -0.276±0.377 | -0.736±0.789 | 1.32E-04 |
| cg23398241 | 2  | 233390712 | CHRND       | -2.945±0.3   | -2.669±0.435 | 1.32E-04 |
| cg14782678 | 17 | 7339721   | TMEM102     | 0.163±0.238  | -0.156±0.556 | 1.32E-04 |
| cg06230736 | 10 | 8096650   | GATA3       | -2.92±0.359  | -1.959±1.765 | 1.32E-04 |
| cg21023001 | 20 | 23067088  | CD93        | -0.189±0.237 | 0.314±0.915  | 1.32E-04 |
| cg10876928 | 20 | 43977473  | SDC4        | -0.537±0.198 | -0.807±0.473 | 1.33E-04 |
| cg14145194 | 19 | 10450022  | ICAM3       | 1.077±0.361  | 0.661±0.706  | 1.33E-04 |
| cg24870273 | 6  | 31938891  | STK19       | 1.846±0.273  | 1.411±0.776  | 1.33E-04 |
| cg06194186 | 2  | 207803693 | CPO         | 1.128±0.245  | 0.832±0.508  | 1.35E-04 |
| cg09914304 | 10 | 72362292  | PRF1        | 1.968±0.447  | 1.546±0.676  | 1.35E-04 |
| cg18142353 | 12 | 12420574  | LRP6        | -2.756±0.4   | -2.427±0.492 | 1.35E-04 |
| cg19950767 | 13 | 20110871  | TPTE2       | 0.507±0.336  | 0.19±0.503   | 1.35E-04 |
| cg13368786 | 20 | 33463522  | ACSS2       | -1.737±0.419 | -2.08±0.498  | 1.36E-04 |
| cg09533063 | 6  | 135271589 | ALDH8A1     | 0.46±0.179   | 0.056±0.737  | 1.36E-04 |
| cg11882252 | 5  | 10307634  | CEMBL       | -3.908±0.447 | -2.929±1.786 | 1.37E-04 |
| cg01125463 | 6  | 42946178  | PBX6        | -2.742±0.351 | -3.051±0.48  | 1.37E-04 |
| cg16248277 | 10 | 103536063 | FGF8        | -1.796±0.364 | -1.467±0.52  | 1.37E-04 |
| cg05028467 | 5  | 176057097 | SNCB        | -2.861±0.592 | -2.203±1.11  | 1.37E-04 |

|            |    |           |           |              |              |          |
|------------|----|-----------|-----------|--------------|--------------|----------|
| cg05745457 | 4  | 164394816 | TKTL2     | 2.283±0.237  | 2.056±0.366  | 1.37E-04 |
| cg08433095 | 15 | 55801069  | DYX1C1    | 2.509±0.224  | 2.696±0.283  | 1.37E-04 |
| cg02071305 | 15 | 41185973  | VPS18     | -2.726±0.365 | -2.409±0.491 | 1.37E-04 |
| cg01422337 | 19 | 48752810  | CARD8     | -1.173±0.27  | -0.749±0.755 | 1.38E-04 |
| cg12493160 | 9  | 71628957  | PRKACG    | 2.95±0.415   | 2.597±0.54   | 1.38E-04 |
| cg07186138 | 22 | 39410396  | APOBEC3C  | -2.673±0.573 | -3.425±1.31  | 1.38E-04 |
| cg22737001 | 1  | 25257029  | RUNX3     | -4.202±0.459 | -3.22±1.79   | 1.39E-04 |
| cg12025941 | 12 | 106977074 | RFX4      | -3.474±0.36  | -3.037±0.752 | 1.39E-04 |
| cg15980408 | 3  | 136538141 | SLC35G2   | -6.486±0.604 | -5.808±1.15  | 1.39E-04 |
| cg06236061 | 12 | 110317318 | GLTP      | -3.007±0.328 | -2.745±0.387 | 1.40E-04 |
| cg23207527 | 6  | 17283113  | RBM24     | 1.496±0.231  | 1.799±0.529  | 1.40E-04 |
| cg08132931 | 2  | 70994962  | ADD2      | -4.546±0.449 | -3.772±1.393 | 1.40E-04 |
| cg09231514 | 19 | 5681323   | C19orf70  | -3.57±0.4    | -3.185±0.623 | 1.40E-04 |
| cg19517291 | 15 | 85201039  | NMB       | 2.359±0.163  | 1.98±0.696   | 1.40E-04 |
| cg10539808 | 18 | 24220737  | KCTD1     | 0.241±0.187  | -0.109±0.635 | 1.40E-04 |
| cg18063149 | 1  | 171060071 | FMO3      | 2.146±0.298  | 2.446±0.494  | 1.40E-04 |
| cg03752628 | 1  | 117453510 | PTGFRN    | -1.234±0.322 | -1.612±0.648 | 1.40E-04 |
| cg18241647 | 20 | 43753347  | WFDC12    | 2.331±0.268  | 2.053±0.462  | 1.41E-04 |
| cg21929875 | 11 | 124622096 | VSIG2     | 1.091±0.253  | 0.766±0.566  | 1.41E-04 |
| cg02322989 | 2  | 142888598 | LRP1B     | -4.013±0.354 | -3.526±0.857 | 1.41E-04 |
| cg09256683 | 17 | 34313637  | CCL14     | 0.365±0.336  | -0.189±0.993 | 1.41E-04 |
| cg20925811 | 20 | 44638517  | MMP9      | 0.898±0.288  | 1.255±0.618  | 1.42E-04 |
| cg06037693 | 1  | 25292072  | RUNX3     | 2.177±0.226  | 1.906±0.467  | 1.42E-04 |
| cg07608333 | 19 | 7813422   | CD209     | 0.059±0.335  | -0.291±0.582 | 1.42E-04 |
| cg23141855 | 7  | 93519892  | TFPI2     | -4.061±0.369 | -3.426±1.145 | 1.43E-04 |
| cg10126874 | 12 | 107487097 | CRY1      | -5.62±0.616  | -5.128±0.728 | 1.44E-04 |
| cg25946758 | 10 | 60936025  | PHYHIP1L  | -3.197±0.311 | -2.724±0.844 | 1.44E-04 |
| cg25724441 | 17 | 68165759  | KCNJ2     | -4.676±0.34  | -4.121±0.996 | 1.44E-04 |
| cg20030243 | 5  | 76011643  | F2R       | -4.925±0.378 | -4.485±0.753 | 1.45E-04 |
| cg07851192 | 18 | 77624513  | KCNG2     | 2.697±0.729  | 3.191±0.62   | 1.45E-04 |
| cg19547629 | 3  | 39851641  | MYRIP     | -4.864±0.545 | -4.164±1.222 | 1.45E-04 |
| cg13435381 | 12 | 71833017  | LGR5      | -3.976±0.403 | -3.528±0.761 | 1.45E-04 |
| cg18312782 | 17 | 62341028  | TEX2      | -2.904±0.437 | -3.208±0.396 | 1.46E-04 |
| cg06479216 | 9  | 21218462  | IFNA16    | 0.525±0.301  | 0.2±0.536    | 1.47E-04 |
| cg22566906 | 12 | 52399713  | GRASP     | -0.317±0.293 | -0.659±0.589 | 1.47E-04 |
| cg15759873 | 2  | 46746934  | ATP6V1E2  | 1.183±0.274  | 1.446±0.428  | 1.47E-04 |
| cg13060154 | 9  | 124461998 | DAB2IP    | -1.985±0.513 | -2.561±0.979 | 1.47E-04 |
| cg22543128 | 9  | 67786307  | FAM27E3   | 2.338±0.263  | 2.059±0.467  | 1.47E-04 |
| cg16950616 | 17 | 53045046  | COX11     | -2.63±0.36   | -2.882±0.332 | 1.47E-04 |
| cg21487207 | 12 | 54410576  | HOXC5     | -2.757±0.39  | -2.108±1.17  | 1.47E-04 |
| cg05497616 | 5  | 110560372 | CAMK4     | -5.525±0.566 | -4.637±1.592 | 1.47E-04 |
| cg13021384 | 15 | 50474754  | SLC27A2   | -4.751±0.426 | -5.115±0.562 | 1.48E-04 |
| cg24599739 | 22 | 24322308  | GSTT2     | -5.423±0.51  | -4.996±0.651 | 1.48E-04 |
| cg14494596 | 3  | 48542040  | SHISA5    | -2.912±0.4   | -2.59±0.48   | 1.48E-04 |
| cg09553448 | 9  | 134000424 | NUP214    | -2.044±0.479 | -2.396±0.49  | 1.49E-04 |
| cg09470640 | 12 | 15476028  | PTPRO     | -4.308±0.469 | -3.817±0.821 | 1.49E-04 |
| cg11301598 | 12 | 121476792 | OASL      | -4.56±0.419  | -4.836±0.333 | 1.49E-04 |
| cg02968557 | 17 | 40275126  | HSPB9     | 2.469±0.421  | 1.868±1.067  | 1.50E-04 |
| cg10608333 | 6  | 27799360  | HIST1H4K  | -2.884±0.626 | -3.775±1.58  | 1.50E-04 |
| cg19717326 | 19 | 54370016  | MYADM     | -1.08±0.348  | -0.658±0.731 | 1.51E-04 |
| cg02855426 | 7  | 129984350 | CPA5      | 0.138±0.392  | -0.269±0.68  | 1.52E-04 |
| cg12811135 | 2  | 88824472  | TEX37     | 3.184±0.262  | 2.854±0.577  | 1.53E-04 |
| cg07236190 | 12 | 96338038  | AMDHD1    | 1.589±0.45   | 1.092±0.846  | 1.54E-04 |
| cg06479512 | 6  | 160221164 | PNLDC1    | 3.115±0.271  | 2.784±0.575  | 1.54E-04 |
| cg07836370 | 12 | 110318755 | GLTP      | -4.347±0.283 | -4.539±0.246 | 1.54E-04 |
| cg10025865 | 14 | 94789681  | SERPINA6  | 0.477±0.206  | 0.115±0.657  | 1.55E-04 |
| cg16270990 | 11 | 130542897 | C11orf44  | 1.153±0.218  | 0.809±0.619  | 1.55E-04 |
| cg22836229 | 8  | 49647717  | EFCAB1    | -2.103±0.444 | -1.379±1.308 | 1.55E-04 |
| cg19070873 | 14 | 96505448  | C14orf132 | -3.389±0.245 | -3.099±0.501 | 1.55E-04 |
| cg15696627 | 4  | 4861183   | MSX1      | -3.982±0.427 | -3.344±1.142 | 1.56E-04 |
| cg23128056 | 17 | 39674626  | KRT15     | 1.892±0.309  | 1.411±0.866  | 1.56E-04 |
| cg17412351 | 7  | 75678396  | MDH2      | -1.17±0.275  | -1.504±0.579 | 1.56E-04 |
| cg26227465 | 12 | 68553577  | IFNG      | 0.978±0.274  | 0.508±0.853  | 1.56E-04 |
| cg22437284 | 20 | 35972536  | SRC       | 1.891±0.343  | 1.333±1.009  | 1.56E-04 |
| cg21522797 | 16 | 81806083  | 0         | 2.732±0.311  | 2.431±0.493  | 1.56E-04 |
| cg16041660 | 12 | 42983360  | PRICKLE1  | -4.973±0.649 | -4.338±1.045 | 1.57E-04 |
| cg01520924 | 14 | 65006170  | HSPA2     | -2.664±0.301 | -3.002±0.576 | 1.57E-04 |
| cg05698069 | 8  | 22436246  | PDLIM2    | -3.3±0.379   | -3.722±0.72  | 1.57E-04 |
| cg18888520 | 19 | 58609806  | ZSCAN18   | -4.307±0.444 | -3.649±1.177 | 1.57E-04 |
| cg01172972 | 1  | 52608558  | ZFYVE9    | -3.267±0.366 | -2.903±0.603 | 1.58E-04 |

|            |    |           |          |              |              |          |
|------------|----|-----------|----------|--------------|--------------|----------|
| cg24254206 | 19 | 46196934  | QPCTL    | -1.688±0.365 | -2.006±0.5   | 1.58E-04 |
| cg18109798 | 12 | 20848473  | SLCO1C1  | 0.363±0.183  | -0.1±0.858   | 1.58E-04 |
| cg16935609 | 5  | 6632086   | NSUN2    | 1.006±0.303  | 1.316±0.514  | 1.58E-04 |
| cg13814950 | 9  | 90112515  | DAPK1    | -4.599±0.357 | -4.301±0.457 | 1.59E-04 |
| cg27654142 | 5  | 178322924 | ZFP2     | -3.606±0.599 | -3.05±0.899  | 1.59E-04 |
| cg07075930 | 18 | 7567717   | PTPRM    | -4.355±0.506 | -3.942±0.626 | 1.59E-04 |
| cg14823162 | 6  | 99281628  | POU3F2   | -4.069±0.466 | -3.478±1.035 | 1.60E-04 |
| cg21380842 | 21 | 39288830  | KCNJ6    | -5.193±0.493 | -4.652±0.922 | 1.60E-04 |
| cg24505122 | 12 | 1726292   | WNT5B    | 2.749±0.287  | 2.478±0.441  | 1.60E-04 |
| cg18801806 | 11 | 118869385 | CCDC84   | -3.187±0.382 | -3.504±0.484 | 1.60E-04 |
| cg19982860 | 9  | 21166581  | IFNA21   | 1.683±0.263  | 1.297±0.691  | 1.60E-04 |
| cg23514672 | 16 | 10788644  | TEKT5    | 3.7±0.365    | 3.383±0.496  | 1.60E-04 |
| cg17385674 | 1  | 27021704  | ARID1A   | -5.476±0.575 | -4.888±0.983 | 1.61E-04 |
| cg14789590 | 22 | 32853844  | BPIFC    | 2.745±0.247  | 2.483±0.442  | 1.62E-04 |
| cg00567749 | 5  | 82767908  | VCAN     | -3.961±0.609 | -3.242±1.247 | 1.62E-04 |
| cg02128567 | 6  | 39196998  | KCNK5    | -4.474±0.641 | -3.788±1.163 | 1.63E-04 |
| cg12205230 | 1  | 154164951 | TPM3     | -0.757±0.272 | -0.258±0.911 | 1.63E-04 |
| cg11847949 | 6  | 32006021  | CYP21A2  | 1.057±0.239  | 0.683±0.676  | 1.63E-04 |
| cg15787039 | 15 | 32934185  | SCG5     | -0.998±0.309 | -0.574±0.755 | 1.64E-04 |
| cg09947274 | 2  | 27439915  | CAD      | -0.161±0.204 | -0.52±0.655  | 1.64E-04 |
| cg08478189 | 2  | 208030666 | KLF7     | -4.662±0.34  | -4.387±0.416 | 1.66E-04 |
| cg19108718 | 5  | 94982330  | RFESD    | -2.646±0.337 | -3.262±1.13  | 1.66E-04 |
| cg14182690 | 1  | 25290947  | RUNX3    | 1.706±0.337  | 1.275±0.759  | 1.67E-04 |
| cg25982743 | 3  | 12200236  | TIMP4    | -0.087±0.316 | -0.436±0.598 | 1.67E-04 |
| cg07749074 | 3  | 186383386 | HRG      | 0.605±0.269  | 0.908±0.521  | 1.69E-04 |
| cg22619563 | 3  | 89156830  | EPHA3    | -4.661±0.376 | -4.101±1.008 | 1.69E-04 |
| cg10705251 | 1  | 26699605  | ZNF683   | 2.833±0.268  | 2.385±0.816  | 1.70E-04 |
| cg19246110 | 19 | 58238928  | ZNF671   | -5.048±0.399 | -3.987±1.981 | 1.70E-04 |
| cg26023389 | 6  | 53013589  | GCM1     | 1.746±0.301  | 2.05±0.51    | 1.70E-04 |
| cg23696712 | 12 | 53228141  | KRT79    | 1.766±0.33   | 2.066±0.485  | 1.71E-04 |
| cg19042950 | 7  | 23509770  | IGF2BP3  | -2.934±0.334 | -3.28±0.585  | 1.71E-04 |
| cg16797831 | 1  | 109657035 | KIAA1324 | -2.603±0.239 | -1.99±1.143  | 1.71E-04 |
| cg14346035 | 8  | 94928406  | MIR378D2 | -5.088±0.424 | -4.744±0.524 | 1.71E-04 |
| cg17870792 | 1  | 82266841  | LPHN2    | -4.552±0.382 | -4.138±0.707 | 1.72E-04 |
| cg02813121 | 1  | 153348911 | S100A12  | 2.309±0.234  | 1.982±0.585  | 1.73E-04 |
| cg15120942 | 3  | 38071578  | PLCD1    | -1.181±0.29  | -0.859±0.554 | 1.73E-04 |
| cg15089487 | 15 | 71185252  | LRRC49   | -4.79±0.432  | -4.464±0.473 | 1.74E-04 |
| cg21351102 | 18 | 3247294   | MYL12A   | -4.682±0.386 | -4.963±0.392 | 1.75E-04 |
| cg06946880 | 2  | 71163123  | ATP6V1B1 | 0.986±0.289  | 0.654±0.576  | 1.76E-04 |
| cg27532722 | 22 | 24115568  | MMP11    | 0.337±0.218  | -0.051±0.714 | 1.76E-04 |
| cg04780454 | 17 | 1647819   | SERPINF2 | 0.566±0.21   | 0.367±0.329  | 1.76E-04 |
| cg08373610 | 2  | 198540621 | RFTN2    | -3.074±0.431 | -2.532±0.955 | 1.76E-04 |
| cg06041363 | 22 | 46663418  | TTC38    | -2.368±0.283 | -2.101±0.439 | 1.76E-04 |
| cg20433014 | 15 | 75018583  | CYP1A1   | -5.82±0.677  | -5.244±0.904 | 1.76E-04 |
| cg18876487 | 21 | 45706101  | AIRE     | 0.004±0.236  | -0.359±0.658 | 1.77E-04 |
| cg14201417 | 9  | 136400057 | ADAMTSL2 | -3.958±0.397 | -3.595±0.589 | 1.77E-04 |
| cg25808906 | 3  | 186080023 | DGKG     | -4.464±0.305 | -3.893±1.053 | 1.78E-04 |
| cg14049461 | 4  | 93224987  | GRID2    | -4.556±0.351 | -4.154±0.698 | 1.79E-04 |
| cg27292431 | 6  | 160543261 | SLC22A1  | 2.82±0.176   | 2.629±0.327  | 1.79E-04 |
| cg11487967 | 2  | 242968692 | 0        | 1.326±0.196  | 1.559±0.406  | 1.79E-04 |
| cg08001895 | 6  | 94129582  | EPHA7    | -4.679±0.539 | -4.087±1.018 | 1.79E-04 |
| cg03875195 | 2  | 27486363  | SLC30A3  | -2.728±0.207 | -2.367±0.664 | 1.80E-04 |
| cg11857445 | 17 | 35305905  | AATF     | -3.885±0.4   | -4.161±0.369 | 1.81E-04 |
| cg26404725 | 10 | 94819802  | CYP26C1  | 1.569±0.224  | 1.878±0.553  | 1.81E-04 |
| cg12497692 | 19 | 36203089  | ZBTB32   | 4.477±0.378  | 4.046±0.748  | 1.81E-04 |
| cg12616277 | 3  | 138153763 | ESYT3    | -3.16±0.455  | -2.831±0.461 | 1.81E-04 |
| cg21565972 | 17 | 80109576  | CCDC57   | 2.987±0.271  | 3.206±0.337  | 1.82E-04 |
| cg02883161 | 12 | 120807618 | MSI1     | -3.02±0.453  | -2.568±0.757 | 1.82E-04 |
| cg12554476 | 16 | 20338808  | GP2      | 1.674±0.312  | 1.13±0.999   | 1.82E-04 |
| cg13828839 | 11 | 117747166 | FXYP6    | -5.013±0.623 | -4.459±0.888 | 1.82E-04 |
| cg16003913 | 16 | 127072    | MPG      | -0.945±0.315 | -0.508±0.783 | 1.82E-04 |
| cg05764376 | 15 | 71184590  | THAP10   | -3.774±0.769 | -3.146±0.965 | 1.82E-04 |
| cg13237829 | 19 | 14640386  | TECR     | -3.717±0.467 | -3.373±0.491 | 1.83E-04 |
| cg00319692 | 8  | 87111119  | ATP6V0D2 | 1.218±0.191  | 0.803±0.772  | 1.83E-04 |
| cg14741922 | 11 | 62036934  | SCGB2A2  | 2.139±0.195  | 1.864±0.495  | 1.84E-04 |
| cg24115040 | 7  | 96652375  | DLX5     | -2.761±0.476 | -2.17±1.045  | 1.84E-04 |
| cg00577464 | 7  | 155604780 | SHH      | -4.682±0.427 | -4.237±0.757 | 1.84E-04 |
| cg02096656 | 7  | 139025181 | C7orf55  | -3.452±0.402 | -3.176±0.365 | 1.84E-04 |
| cg01197831 | 9  | 97355941  | FBP2     | 1.423±0.175  | 1.64±0.384   | 1.86E-04 |
| cg13140740 | 7  | 12726553  | ARL4A    | -2.134±0.37  | -1.821±0.492 | 1.86E-04 |

|            |    |           |           |              |              |          |
|------------|----|-----------|-----------|--------------|--------------|----------|
| cg06397837 | 7  | 27240251  | HOTTIP    | -4.419±0.575 | -3.62±1.436  | 1.86E-04 |
| cg19778698 | 7  | 1570060   | MAFK      | -2.425±0.31  | -2.12±0.51   | 1.87E-04 |
| cg15170424 | 8  | 92052897  | TMEM55A   | -4.877±0.455 | -4.386±0.846 | 1.90E-04 |
| cg20483374 | 11 | 119211646 | C1QTNF5   | -2.432±0.46  | -2.007±0.696 | 1.90E-04 |
| cg08529529 | 13 | 31309799  | ALOX5AP   | 0.82±0.354   | 0.398±0.742  | 1.90E-04 |
| cg10787197 | 6  | 11779941  | ADTRP     | 0.733±0.233  | 1.01±0.489   | 1.90E-04 |
| cg13265003 | 21 | 43919023  | SLC37A1   | 1.317±0.218  | 1.571±0.445  | 1.91E-04 |
| cg25692323 | 10 | 44101569  | ZNF485    | 0.414±0.195  | 0.087±0.602  | 1.91E-04 |
| cg09089053 | 19 | 40731797  | CNTD2     | -2.056±0.232 | -2.331±0.483 | 1.91E-04 |
| cg12038710 | 8  | 95220583  | CDH17     | 2.535±0.173  | 2.334±0.352  | 1.92E-04 |
| cg25022327 | 11 | 128812462 | TP53AIP1  | 3.165±0.331  | 2.827±0.573  | 1.92E-04 |
| cg22241124 | 2  | 98986375  | CNGA3     | 0.653±0.201  | 1.027±0.695  | 1.92E-04 |
| cg25344367 | 19 | 44220337  | IRGC      | 1.728±0.18   | 1.865±0.201  | 1.93E-04 |
| cg05154390 | 1  | 36929274  | MRPS15    | -2.585±0.288 | -2.147±0.798 | 1.93E-04 |
| cg10247252 | 17 | 74071168  | GALR2     | -2.379±0.378 | -1.877±0.9   | 1.94E-04 |
| cg01557989 | 20 | 19192675  | SLC24A3   | -4.483±0.514 | -3.972±0.86  | 1.94E-04 |
| cg23978322 | 6  | 97010439  | FHL5      | 1.429±0.205  | 1.104±0.597  | 1.95E-04 |
| cg27132814 | 20 | 18794303  | SCP2D1    | -0.082±0.248 | -0.439±0.647 | 1.96E-04 |
| cg21578541 | 3  | 52260090  | TLR9      | 1.13±0.314   | 0.805±0.554  | 1.96E-04 |
| cg25738273 | 8  | 33457336  | DUSP26    | -4.304±0.461 | -3.838±0.789 | 1.96E-04 |
| cg27040030 | 16 | 325184    | RGS11     | -3±0.379     | -2.542±0.808 | 1.96E-04 |
| cg22546318 | 12 | 54070378  | ATP5G2    | -2.764±0.323 | -3.316±1.02  | 1.96E-04 |
| cg04559909 | 4  | 74864725  | CXCL5     | 1.35±0.232   | 1.706±0.651  | 1.97E-04 |
| cg01126560 | 9  | 139886304 | C9orf142  | -0.146±0.257 | -0.514±0.668 | 1.97E-04 |
| cg12958813 | 1  | 198509669 | ATP6V1G3  | 1.703±0.327  | 2.082±0.66   | 1.97E-04 |
| cg08082692 | 10 | 125805493 | CHST15    | 1.842±0.289  | 1.553±0.489  | 1.97E-04 |
| cg20550118 | 15 | 78633662  | CRABP1    | -3.005±0.294 | -2.523±0.888 | 1.98E-04 |
| cg19863405 | 9  | 111619070 | ACTL7B    | 1.914±0.243  | 1.605±0.551  | 1.99E-04 |
| cg25524350 | 7  | 94284893  | SGCE      | -4.473±0.361 | -3.889±1.072 | 1.99E-04 |
| cg04518808 | 19 | 54384822  | PRKCG     | -3.148±0.348 | -2.678±0.846 | 1.99E-04 |
| cg19553721 | 17 | 18429951  | FAM106A   | 1.526±0.21   | 1.289±0.415  | 1.99E-04 |
| cg08045757 | 12 | 48192686  | HDAC7     | 2.243±0.192  | 2.374±0.173  | 2.00E-04 |
| cg12699145 | 16 | 18995637  | TMC7      | -3.414±0.455 | -2.983±0.717 | 2.02E-04 |
| cg12032049 | 17 | 56314779  | LPO       | 1.621±0.231  | 1.151±0.871  | 2.02E-04 |
| cg17307280 | 5  | 174871636 | DRD1      | -4.037±0.414 | -3.531±0.897 | 2.02E-04 |
| cg22129364 | 1  | 53067894  | GPX7      | -4.257±0.357 | -3.607±1.208 | 2.02E-04 |
| cg03473294 | 20 | 13619704  | TASP1     | -5.083±0.333 | -5.335±0.371 | 2.04E-04 |
| cg10183248 | 17 | 42295591  | UBTF      | -4.629±0.455 | -4.149±0.825 | 2.04E-04 |
| cg09624565 | 22 | 37256900  | NCF4      | 0.881±0.24   | 0.603±0.49   | 2.05E-04 |
| cg01888411 | 11 | 34378293  | ABTB2     | -3.31±0.298  | -2.897±0.748 | 2.05E-04 |
| cg02555579 | 22 | 18043043  | SLC25A18  | 0.363±0.298  | 0.677±0.536  | 2.05E-04 |
| cg27360098 | 7  | 73442480  | ELN       | -3.095±0.68  | -2.524±0.903 | 2.05E-04 |
| cg24770850 | 3  | 129325130 | PLXND1    | -5.893±0.51  | -5.496±0.602 | 2.06E-04 |
| cg14401837 | 7  | 34697493  | NPSR1     | 1.469±0.234  | 1±0.876      | 2.07E-04 |
| cg07054095 | 19 | 58038856  | ZNF549    | -4.979±0.457 | -4.253±1.335 | 2.07E-04 |
| cg10001720 | 1  | 31231363  | LAPTM5    | 1.069±0.306  | 1.341±0.442  | 2.07E-04 |
| cg03721967 | 13 | 114009720 | GRTP1     | 3.143±0.251  | 2.951±0.287  | 2.08E-04 |
| cg10704545 | 1  | 193075590 | GLRX2     | 1.852±0.328  | 2.096±0.355  | 2.08E-04 |
| cg11465372 | 12 | 53171191  | KRT76     | 2.499±0.235  | 2.233±0.466  | 2.09E-04 |
| cg16539629 | 14 | 96505722  | C14orf132 | -3.713±0.724 | -3.054±1.083 | 2.09E-04 |
| cg17829936 | 6  | 132910681 | TAAR5     | 0.84±0.596   | 0.31±0.863   | 2.10E-04 |
| cg20342105 | 11 | 62474910  | GNG3      | 2.133±0.213  | 2.328±0.322  | 2.10E-04 |
| cg23552468 | 9  | 35040926  | C9orf131  | 0.793±0.367  | 0.468±0.529  | 2.11E-04 |
| cg22960952 | 4  | 76481169  | C4orf26   | 0.174±0.237  | -0.199±0.687 | 2.12E-04 |
| cg16480209 | 16 | 58004460  | CNGB1     | 3.6±0.336    | 3.885±0.456  | 2.13E-04 |
| cg25852715 | 11 | 3121024   | OSBPL5    | 3.818±0.226  | 3.642±0.268  | 2.13E-04 |
| cg20509080 | 3  | 56835873  | ARHGEF3   | -4.766±0.537 | -5.118±0.448 | 2.14E-04 |
| cg26511075 | 5  | 36301436  | RANBP3L   | 2.07±0.282   | 1.622±0.825  | 2.16E-04 |
| cg26090652 | 11 | 119211440 | C1QTNF5   | -4.715±0.496 | -4.314±0.623 | 2.16E-04 |
| cg24505375 | 8  | 11188774  | SLC35G5   | 1.128±0.322  | 0.906±0.302  | 2.16E-04 |
| cg24858591 | 3  | 44803638  | KIF15     | -3.629±0.523 | -3.987±0.484 | 2.16E-04 |
| cg05101920 | 1  | 160040217 | KCNJ10    | -3.607±0.273 | -3.207±0.732 | 2.18E-04 |
| cg11920519 | 20 | 33135025  | MAP1LC3A  | 2.467±0.314  | 2.024±0.809  | 2.18E-04 |
| cg07846167 | 1  | 16084758  | FBLIM1    | -0.555±0.327 | -1.069±0.949 | 2.19E-04 |
| cg13486556 | 15 | 52044539  | TMOD2     | -0.877±0.189 | -0.636±0.433 | 2.19E-04 |
| cg00033516 | 4  | 38666773  | FLJ13197  | -4.066±0.42  | -3.748±0.473 | 2.19E-04 |
| cg20861607 | 15 | 32323114  | CHRNA7    | -3.857±0.291 | -3.418±0.807 | 2.19E-04 |
| cg04525496 | 5  | 82767526  | VCAN      | -4.447±0.456 | -3.794±1.195 | 2.21E-04 |
| cg19714296 | 1  | 47407400  | CYP4A11   | 2.47±0.199   | 2.274±0.331  | 2.22E-04 |
| cg11405695 | 1  | 1384091   | ATAD3C    | -0.266±0.239 | -0.636±0.682 | 2.22E-04 |

|            |    |           |           |              |              |          |
|------------|----|-----------|-----------|--------------|--------------|----------|
| cg18173454 | 10 | 15209775  | NMT2      | -4.376±0.333 | -4.139±0.335 | 2.22E-04 |
| cg15352315 | 2  | 160655036 | CD302     | -2.233±0.511 | -1.759±0.79  | 2.23E-04 |
| cg05890019 | 4  | 85886830  | WDFY3     | -3.161±0.628 | -2.62±0.874  | 2.24E-04 |
| cg25665697 | 15 | 66857881  | LCTL      | -0.36±0.184  | -0.11±0.455  | 2.25E-04 |
| cg03742214 | 12 | 107487383 | CRY1      | -5.287±0.675 | -4.763±0.798 | 2.25E-04 |
| cg26987645 | 1  | 203320386 | FMOD      | -1.081±0.624 | -1.605±0.836 | 2.25E-04 |
| cg26770281 | 19 | 56109975  | FIZ1      | 3.289±0.279  | 3.552±0.44   | 2.26E-04 |
| cg00216361 | 3  | 115342527 | GAP43     | -3.1±0.556   | -3.633±0.898 | 2.26E-04 |
| cg02286642 | 19 | 24270073  | ZNF254    | -3.436±0.589 | -2.744±1.231 | 2.26E-04 |
| cg13470920 | 19 | 6772831   | VAV1      | 0.484±0.224  | 0.158±0.598  | 2.27E-04 |
| cg20090467 | 9  | 67927004  | ANKRD20A3 | -0.117±0.148 | 0.006±0.194  | 2.27E-04 |
| cg24352530 | 4  | 89080423  | ABCG2     | -3.816±0.459 | -3.218±1.082 | 2.27E-04 |
| cg00033773 | 19 | 12779366  | WDR83OS   | 2.365±0.289  | 2.736±0.67   | 2.27E-04 |
| cg15842884 | 20 | 5591925   | GPCPD1    | -5.363±0.403 | -5.666±0.451 | 2.27E-04 |
| cg17361154 | 9  | 140336563 | ENTPD8    | -1.683±0.248 | -1.996±0.563 | 2.28E-04 |
| cg01055695 | 9  | 138452950 | PAEP      | 0.833±0.243  | 0.378±0.854  | 2.28E-04 |
| cg10501128 | 13 | 29069100  | FLT1      | -5.437±0.527 | -4.93±0.857  | 2.28E-04 |
| cg10364182 | 11 | 36615998  | C11orf74  | -3.543±0.503 | -3.129±0.655 | 2.28E-04 |
| cg12866859 | 17 | 43224332  | HEXIM1    | -0.013±0.237 | -0.353±0.624 | 2.29E-04 |
| cg03475172 | 10 | 11654177  | USP6NL    | -3.347±0.305 | -2.988±0.638 | 2.29E-04 |
| cg16581199 | 5  | 112770721 | TSSK1B    | 2.039±0.324  | 1.749±0.479  | 2.30E-04 |
| cg12302621 | 15 | 85426911  | SLC28A1   | 0.872±0.348  | 0.41±0.838   | 2.31E-04 |
| cg04916911 | 12 | 86268154  | NTS       | -3.754±0.443 | -3.177±1.044 | 2.31E-04 |
| cg03046445 | 12 | 26277826  | BHLHE41   | -3.576±0.329 | -3.971±0.708 | 2.32E-04 |
| cg13302154 | 12 | 15039432  | MGP       | -1.997±0.385 | -1.613±0.653 | 2.32E-04 |
| cg21210758 | 4  | 5713005   | EVC       | -2.543±0.397 | -2.206±0.541 | 2.32E-04 |
| cg09645888 | 11 | 86383585  | ME3       | -3.969±0.43  | -3.658±0.449 | 2.32E-04 |
| cg22521310 | 2  | 64881850  | SERTAD2   | -4.21±0.61   | -3.798±0.552 | 2.32E-04 |
| cg02282237 | 14 | 61788862  | PRKCH     | -5.19±0.433  | -4.809±0.624 | 2.33E-04 |
| cg07465864 | 5  | 112849162 | YTHDC2    | -1.905±0.282 | -2.173±0.453 | 2.33E-04 |
| cg01471713 | 1  | 220864279 | C1orf115  | -2.293±0.347 | -1.8±0.905   | 2.33E-04 |
| cg18328334 | 2  | 218808652 | TNS1      | -1.466±0.47  | -0.956±0.895 | 2.35E-04 |
| cg11572744 | 5  | 146832933 | DPYSL3    | -4.832±0.496 | -4.476±0.512 | 2.35E-04 |
| cg03112869 | 3  | 48413769  | FBXW12    | 2.401±0.192  | 2.18±0.392   | 2.35E-04 |
| cg24625388 | 10 | 21463858  | NEBL      | -1.476±0.33  | -1.818±0.595 | 2.37E-04 |
| cg06812844 | 21 | 45773782  | TRPM2     | 1.269±0.27   | 0.792±0.893  | 2.37E-04 |
| cg15777781 | 10 | 11047271  | CELF2     | 0.564±0.241  | 1.059±0.938  | 2.38E-04 |
| cg06777274 | 18 | 48406251  | ME2       | -4.598±0.347 | -4.841±0.343 | 2.38E-04 |
| cg06466479 | 5  | 34919428  | BRIX1     | 2.856±0.186  | 2.649±0.364  | 2.38E-04 |
| cg26029902 | 20 | 56884425  | PPP4R1L   | -2.277±0.516 | -1.534±1.367 | 2.38E-04 |
| cg07845566 | 11 | 134282408 | B3GAT1    | -5.701±0.756 | -5.024±1.12  | 2.40E-04 |
| cg07052880 | 2  | 71161697  | ATP6V1B1  | 2.886±0.172  | 2.723±0.276  | 2.40E-04 |
| cg15755548 | 16 | 331050    | ARHGDIG   | -3.453±0.363 | -2.972±0.876 | 2.41E-04 |
| cg23431988 | 8  | 22132563  | PIWIL2    | 2.442±0.262  | 2.091±0.642  | 2.43E-04 |
| cg23753610 | 17 | 76567830  | DNAH17    | 4.563±0.362  | 4.22±0.581   | 2.44E-04 |
| cg12144803 | 3  | 123813383 | KALRN     | 2.564±0.209  | 2.329±0.416  | 2.44E-04 |
| cg23101680 | 13 | 46277286  | SPERT     | -0.662±0.253 | -0.923±0.453 | 2.44E-04 |
| cg23216015 | 7  | 31726654  | PPP1R17   | 0.121±0.284  | 0.578±0.854  | 2.46E-04 |
| cg19841506 | 17 | 4642056   | CXCL16    | -3.174±0.404 | -3.543±0.617 | 2.47E-04 |
| cg02046340 | 20 | 48552742  | RNF114    | -3.784±0.375 | -4.101±0.513 | 2.48E-04 |
| cg19642007 | 11 | 1944464   | TNNT3     | 2.055±0.352  | 1.604±0.821  | 2.48E-04 |
| cg01669948 | 6  | 39290877  | KCNK16    | 2.202±0.255  | 1.899±0.545  | 2.49E-04 |
| cg10834677 | 1  | 113263289 | FAM19A3   | 1.552±0.206  | 1.329±0.393  | 2.50E-04 |
| cg10715231 | 5  | 157079546 | SOX30     | 3.462±0.276  | 3.094±0.674  | 2.51E-04 |
| cg23829949 | 1  | 244214679 | ZBTB18    | 0.226±0.272  | 0.673±0.838  | 2.52E-04 |
| cg00896220 | 17 | 34639327  | CCL4L2    | 1.575±0.696  | 0.98±0.967   | 2.53E-04 |
| cg15777570 | 9  | 34662951  | CCL27     | 2.601±0.155  | 2.443±0.274  | 2.54E-04 |
| cg26112901 | 6  | 137494988 | IL22RA2   | 2.974±0.292  | 2.621±0.636  | 2.54E-04 |
| cg25667202 | 1  | 153963072 | RPS27     | -3.694±0.511 | -4.035±0.458 | 2.54E-04 |
| cg01704534 | 4  | 40518024  | RBM47     | -2.416±0.31  | -2.744±0.578 | 2.55E-04 |
| cg05510041 | 10 | 75758427  | VCL       | -3.852±0.308 | -3.605±0.39  | 2.55E-04 |
| cg05492845 | 11 | 64002298  | VEGFB     | -5.698±0.49  | -5.292±0.65  | 2.55E-04 |
| cg20584011 | 5  | 851422    | ZDHHC11   | 0.739±0.288  | 0.324±0.768  | 2.56E-04 |
| cg08555657 | 1  | 153068231 | SPRR2E    | 1.309±0.259  | 0.843±0.879  | 2.56E-04 |
| cg13791713 | 21 | 40720916  | HMGN1     | -0.554±0.099 | -0.656±0.179 | 2.56E-04 |
| cg23865698 | 16 | 84327808  | WFDL1     | 0.211±0.311  | -0.256±0.868 | 2.56E-04 |
| cg11714502 | 9  | 130640212 | AK1       | -1.436±0.421 | -1.022±0.712 | 2.57E-04 |
| cg01462829 | 4  | 11430903  | HS3ST1    | -4.686±0.564 | -4.31±0.505  | 2.57E-04 |
| cg19030554 | 16 | 1822289   | NME3      | -2.142±0.519 | -2.694±0.97  | 2.57E-04 |
| cg00307685 | 1  | 92415524  | BRDT      | 2.876±0.218  | 2.557±0.591  | 2.57E-04 |

|            |    |           |                 |              |              |          |
|------------|----|-----------|-----------------|--------------|--------------|----------|
| cg08818784 | 19 | 51522198  | <i>KLK10</i>    | -4.633±0.555 | -3.929±1.282 | 2.57E-04 |
| cg03782453 | 4  | 7043935   | <i>CCDC96</i>   | -1.015±0.42  | -0.555±0.816 | 2.57E-04 |
| cg07236769 | 9  | 21142491  | <i>IFNW1</i>    | 1.11±0.386   | 0.8±0.49     | 2.58E-04 |
| cg06183267 | 2  | 100759134 | <i>AFF3</i>     | 0.562±0.395  | 0.066±0.9    | 2.58E-04 |
| cg27394566 | 14 | 105391635 | <i>PLD4</i>     | 2.415±0.216  | 2.212±0.345  | 2.58E-04 |
| cg22117143 | 9  | 13251431  | <i>MPDZ</i>     | 2.863±0.288  | 2.604±0.431  | 2.59E-04 |
| cg17607024 | 10 | 126630765 | <i>ZRANB1</i>   | 0.649±0.418  | 0.959±0.429  | 2.59E-04 |
| cg12532477 | 16 | 75529504  | <i>CHST6</i>    | 0.132±0.228  | -0.207±0.632 | 2.60E-04 |
| cg08548888 | 3  | 38180840  | <i>MYD88</i>    | -2.824±0.308 | -3.044±0.32  | 2.60E-04 |
| cg05861567 | 22 | 50523686  | <i>MLC1</i>     | -1.197±0.406 | -1.624±0.75  | 2.61E-04 |
| cg08739282 | 4  | 24586511  | <i>DHX15</i>    | -2.823±0.373 | -3.152±0.547 | 2.63E-04 |
| cg13986618 | 12 | 7595981   | <i>CD163L1</i>  | 1.158±0.276  | 0.731±0.796  | 2.63E-04 |
| cg23637791 | 15 | 76016262  | <i>ODF3L1</i>   | -3.303±0.251 | -3.105±0.31  | 2.63E-04 |
| cg12286890 | 1  | 168513067 | <i>XCL2</i>     | 1.915±0.301  | 1.53±0.703   | 2.64E-04 |
| cg11337780 | 19 | 11977718  | <i>ZNF439</i>   | 1.754±0.41   | 1.418±0.538  | 2.64E-04 |
| cg24117468 | 5  | 131562848 | <i>P4HA2</i>    | -0.707±0.263 | -1.08±0.692  | 2.66E-04 |
| cg25866075 | 19 | 54327780  | <i>NLRP12</i>   | -0.356±0.341 | -0.747±0.703 | 2.67E-04 |
| cg25216696 | 8  | 11565351  | <i>GATA4</i>    | -1.244±0.806 | -0.594±1.033 | 2.67E-04 |
| cg26709863 | 17 | 40976775  | <i>BECN1</i>    | 3.002±0.186  | 2.798±0.362  | 2.67E-04 |
| cg16983159 | 5  | 138862441 | <i>TMEM173</i>  | -4.03±0.554  | -3.602±0.662 | 2.67E-04 |
| cg26185508 | 1  | 54619445  | <i>CDCP2</i>    | 0.875±0.302  | 0.373±0.945  | 2.67E-04 |
| cg18411891 | 11 | 86666000  | <i>FZD4</i>     | -5.429±0.455 | -5.076±0.548 | 2.68E-04 |
| cg23843505 | 20 | 42295420  | <i>MYBL2</i>    | -2.172±0.359 | -2.79±1.166  | 2.68E-04 |
| cg25979644 | 18 | 55399003  | <i>ATP8B1</i>   | 2.281±0.391  | 1.953±0.533  | 2.69E-04 |
| cg17864730 | 7  | 20370899  | <i>ITGB8</i>    | -4.553±0.398 | -4.943±0.673 | 2.69E-04 |
| cg08538752 | 21 | 10990890  | <i>TPTE</i>     | 0.051±0.194  | 0.239±0.323  | 2.70E-04 |
| cg18602314 | 5  | 179780802 | <i>GFPT2</i>    | -5.604±0.518 | -5.062±0.953 | 2.70E-04 |
| cg00386408 | 5  | 135364970 | <i>TGFBI</i>    | -2.198±0.533 | -1.705±0.835 | 2.71E-04 |
| cg08595011 | 3  | 43147479  | <i>GTDC2</i>    | -3.688±0.257 | -3.479±0.334 | 2.71E-04 |
| cg15475323 | 19 | 49220102  | <i>MAMSTR</i>   | -0.605±0.44  | -0.092±0.924 | 2.71E-04 |
| cg05322019 | 10 | 102732323 | <i>SEMA4G</i>   | 2.335±0.252  | 2.032±0.55   | 2.71E-04 |
| cg23904249 | 11 | 60608951  | <i>CCDC86</i>   | 0.879±0.329  | 1.327±0.827  | 2.71E-04 |
| cg16158807 | 9  | 95946891  | <i>WNK2</i>     | -3.029±0.367 | -2.593±0.788 | 2.71E-04 |
| cg15361231 | 1  | 193075191 | <i>GLRX2</i>    | -0.196±0.235 | 0.131±0.602  | 2.71E-04 |
| cg10517312 | 15 | 45027253  | <i>TRIM69</i>   | -0.124±0.285 | -0.472±0.631 | 2.71E-04 |
| cg10889792 | 11 | 71258917  | <i>KRTAP5-9</i> | 2.015±0.328  | 1.587±0.787  | 2.71E-04 |
| cg05215575 | 16 | 4838722   | <i>42625</i>    | -1.046±0.33  | -1.412±0.654 | 2.72E-04 |
| cg03752087 | 19 | 15163470  | <i>CASP14</i>   | 1.735±0.467  | 1.285±0.774  | 2.73E-04 |
| cg17610929 | 2  | 220379044 | <i>ASIC4</i>    | -5.099±0.59  | -4.507±1.03  | 2.73E-04 |
| cg06459066 | 14 | 64855287  | <i>MTHFD1</i>   | -4.612±0.278 | -4.8±0.261   | 2.74E-04 |
| cg07789083 | 17 | 72427563  | <i>GPRC5C</i>   | -4.081±0.696 | -3.475±1.002 | 2.74E-04 |
| cg20311501 | 5  | 112073502 | <i>APC</i>      | -3.195±0.483 | -2.178±1.947 | 2.75E-04 |
| cg18555555 | 6  | 123099534 | <i>FABP7</i>    | 5.297±0.417  | 5.001±0.428  | 2.75E-04 |
| cg00250430 | 9  | 1051579   | <i>DMRT2</i>    | -2.974±0.29  | -2.605±0.675 | 2.75E-04 |
| cg23983449 | 17 | 7146757   | <i>GABARAP</i>  | -1.38±0.344  | -1.031±0.609 | 2.76E-04 |
| cg24693368 | 2  | 155554844 | <i>KCNJ3</i>    | -2.889±0.369 | -2.372±0.959 | 2.76E-04 |
| cg20583073 | 19 | 3178759   | <i>S1PR4</i>    | 0.843±0.252  | 1.195±0.654  | 2.76E-04 |
| cg18913951 | 11 | 129685362 | <i>TMEM45B</i>  | 4.196±0.315  | 3.769±0.79   | 2.77E-04 |
| cg00043004 | 16 | 2030892   | <i>NOXO1</i>    | -3.821±0.502 | -3.305±0.906 | 2.77E-04 |
| cg25107791 | 6  | 35764958  | <i>CLPS</i>     | 1.175±0.207  | 0.842±0.627  | 2.78E-04 |
| cg13043862 | 8  | 72274598  | <i>EYA1</i>     | -3.674±0.416 | -3.022±1.225 | 2.80E-04 |
| cg26702254 | 7  | 119912586 | <i>KCND2</i>    | -4.528±0.681 | -3.903±1.06  | 2.80E-04 |
| cg09841009 | 4  | 145061960 | <i>GYPA</i>     | 2.228±0.174  | 1.915±0.594  | 2.81E-04 |
| cg21017752 | 10 | 93393203  | <i>PPP1R3C</i>  | -3.775±0.351 | -3.296±0.888 | 2.82E-04 |
| cg01917648 | 12 | 101871337 | <i>SPIC</i>     | 1.227±0.304  | 0.942±0.489  | 2.82E-04 |
| cg17853587 | 4  | 118954386 | <i>NDST3</i>    | -4.28±0.441  | -3.906±0.613 | 2.83E-04 |
| cg02077702 | 15 | 74465888  | <i>ISLR</i>     | 0.274±0.289  | 0.553±0.482  | 2.84E-04 |
| cg07476030 | 6  | 107078648 | <i>QRSL1</i>    | 1.202±0.289  | 0.94±0.444   | 2.84E-04 |
| cg02797569 | 7  | 100200009 | <i>PCOLCE</i>   | 0.401±0.208  | 0.796±0.753  | 2.84E-04 |
| cg00586909 | 6  | 20534671  | <i>CDKAL1</i>   | -2.509±0.562 | -2.902±0.566 | 2.86E-04 |
| cg26620959 | 6  | 152958489 | <i>SYNE1</i>    | -3.728±0.382 | -3.231±0.917 | 2.89E-04 |
| cg04616963 | 1  | 168545592 | <i>XCL1</i>     | -0.022±0.234 | -0.419±0.753 | 2.89E-04 |
| cg01664666 | 1  | 242687465 | <i>PLD5</i>     | -3.852±0.426 | -3.359±0.892 | 2.90E-04 |
| cg22064451 | 12 | 49583496  | <i>TUBA1A</i>   | -0.002±0.221 | 0.198±0.336  | 2.91E-04 |
| cg00338702 | 12 | 133463694 | <i>CHFR</i>     | -3.719±0.349 | -3.322±0.717 | 2.91E-04 |
| cg11724759 | 1  | 68915898  | <i>RPE65</i>    | 0.165±0.224  | -0.251±0.795 | 2.91E-04 |
| cg19428735 | 4  | 110748407 | <i>RRH</i>      | 0.184±0.355  | 0.437±0.368  | 2.91E-04 |
| cg09360083 | 11 | 134124536 | <i>ACAD8</i>    | 0.694±0.304  | 0.376±0.563  | 2.92E-04 |
| cg23964386 | 9  | 114362249 | <i>PTGR1</i>    | -2.757±0.448 | -2.349±0.693 | 2.93E-04 |
| cg22510822 | 17 | 3337427   | <i>OR1E2</i>    | 1.658±0.309  | 1.142±0.98   | 2.93E-04 |

|            |    |           |           |              |              |          |
|------------|----|-----------|-----------|--------------|--------------|----------|
| cg24845207 | 1  | 53924998  | DMRTB1    | 4.854±0.307  | 4.6±0.414    | 2.94E-04 |
| cg01407244 | 8  | 22961007  | TNFRSF10C | -2.267±0.307 | -2.542±0.463 | 2.94E-04 |
| cg04011402 | 5  | 95188290  | C5orf27   | 1.268±0.133  | 1.165±0.161  | 2.94E-04 |
| cg09185773 | 13 | 27132773  | WASF3     | -3.706±0.419 | -3.31±0.681  | 2.95E-04 |
| cg19709625 | 3  | 142607981 | PCOLCE2   | -4.971±0.573 | -4.451±0.882 | 2.95E-04 |
| cg00554173 | 20 | 3149777   | LZTS3     | 1.75±0.276   | 1.465±0.504  | 2.95E-04 |
| cg23211240 | 11 | 111383624 | MIR34B    | -2.209±0.459 | -1.652±1.02  | 2.95E-04 |
| cg03354772 | 10 | 134756503 | TTC40     | -3.04±0.564  | -2.601±0.691 | 2.97E-04 |
| cg15591678 | 10 | 64134155  | ZNF365    | -5.247±0.529 | -4.636±1.109 | 2.97E-04 |
| cg13461622 | 1  | 25291385  | RUNX3     | 0.503±0.393  | 0.067±0.785  | 2.98E-04 |
| cg15153383 | 16 | 57770620  | KATNB1    | -4.173±0.365 | -3.774±0.715 | 2.98E-04 |
| cg23617121 | 11 | 3121460   | OSBPL5    | 4.088±0.334  | 4.378±0.483  | 3.00E-04 |
| cg04698187 | 1  | 204654145 | LRRN2     | -3.839±0.332 | -3.389±0.838 | 3.01E-04 |
| cg19103704 | 19 | 40440963  | FCGBP     | -0.431±0.218 | -0.779±0.658 | 3.03E-04 |
| cg07469792 | 12 | 26112121  | RASSF8    | -5.386±0.38  | -5.133±0.348 | 3.03E-04 |
| cg20342082 | 1  | 228003402 | PRSS38    | 3.95±0.332   | 3.464±0.914  | 3.03E-04 |
| cg01934797 | 16 | 4381661   | GLIS2     | 2.014±0.465  | 2.345±0.487  | 3.04E-04 |
| cg23001457 | 11 | 18956283  | MRGPRX1   | 0.093±0.279  | -0.315±0.767 | 3.05E-04 |
| cg11608424 | 7  | 92849851  | HEPACAM2  | 2.213±0.287  | 1.75±0.879   | 3.05E-04 |
| cg01556075 | 19 | 7741454   | C19orf59  | -3.067±0.363 | -3.371±0.5   | 3.05E-04 |
| cg01227741 | 7  | 150211179 | GIMAP7    | 1.854±0.391  | 1.215±1.216  | 3.06E-04 |
| cg22289810 | 17 | 29421607  | MIR4733   | -3.412±0.386 | -2.945±0.856 | 3.06E-04 |
| cg26565975 | 21 | 31988616  | KRTAP20-1 | 2.75±0.325   | 2.281±0.88   | 3.07E-04 |
| cg07699362 | 5  | 150400139 | GPX3      | -4.671±0.62  | -4.167±0.816 | 3.08E-04 |
| cg01678321 | 5  | 150683530 | SLC36A3   | 1.348±0.296  | 1.06±0.501   | 3.09E-04 |
| cg16293656 | 8  | 21900438  | FGF17     | -3.172±0.395 | -2.683±0.899 | 3.09E-04 |
| cg11070419 | 1  | 207277210 | C4BPA     | -0.321±0.299 | -0.774±0.854 | 3.09E-04 |
| cg06029655 | 19 | 42881132  | MEGF8     | 2.899±0.403  | 2.55±0.583   | 3.10E-04 |
| cg00702729 | 7  | 99757654  | C7orf43   | 3.032±0.208  | 2.87±0.257   | 3.12E-04 |
| cg21596317 | 5  | 102201545 | PAM       | -4.133±0.537 | -3.51±1.134  | 3.14E-04 |
| cg23442323 | 6  | 74406189  | CD109     | -3.98±0.401  | -3.475±0.933 | 3.14E-04 |
| cg08124722 | 17 | 32597714  | CCL7      | 2.958±0.184  | 2.778±0.315  | 3.18E-04 |
| cg09411212 | 3  | 119379220 | POPDC2    | 2.714±0.304  | 2.414±0.527  | 3.19E-04 |
| cg08871917 | 7  | 92076509  | GATAD1    | -4.232±0.374 | -4.511±0.429 | 3.20E-04 |
| cg18271969 | 3  | 183771499 | HTR3C     | 2.959±0.382  | 2.621±0.572  | 3.21E-04 |
| cg27214365 | 4  | 144940612 | GYPB      | 2.227±0.204  | 1.921±0.579  | 3.21E-04 |
| cg04254916 | 12 | 52914047  | KRT5      | 2.445±0.339  | 2.057±0.706  | 3.22E-04 |
| cg13037275 | 11 | 94965364  | SESN3     | -3.515±0.535 | -2.741±1.46  | 3.23E-04 |
| cg10240853 | 7  | 100210548 | MOSPD3    | -4.343±0.462 | -3.776±1.046 | 3.23E-04 |
| cg16426459 | 2  | 238396155 | MLPH      | -2.302±0.23  | -2.562±0.473 | 3.23E-04 |
| cg09381701 | 6  | 148663829 | SASH1     | -5.046±0.433 | -4.704±0.548 | 3.23E-04 |
| cg21053323 | 21 | 46237385  | SUMO3     | -1.47±0.537  | -0.994±0.807 | 3.24E-04 |
| cg24249775 | 17 | 38978344  | KRT10     | 1.67±0.329   | 1.233±0.809  | 3.25E-04 |
| cg06341721 | 19 | 1406759   | DAZAP1    | -3.357±0.37  | -3.626±0.406 | 3.26E-04 |
| cg01500097 | 6  | 110011156 | AK9       | -1.064±0.347 | -0.772±0.483 | 3.26E-04 |
| cg22625415 | 5  | 52084413  | ITGA1     | -4.16±0.516  | -3.777±0.589 | 3.27E-04 |
| cg05600717 | 13 | 52378744  | DHRS12    | -3.12±0.363  | -2.573±1.038 | 3.27E-04 |
| cg06088032 | 3  | 50383227  | ZMYND10   | -1.059±0.621 | -1.921±1.62  | 3.27E-04 |
| cg16250754 | 5  | 40841579  | CARD6     | -1.888±0.498 | -2.277±0.587 | 3.28E-04 |
| cg10525488 | 4  | 113066439 | C4orf32   | -2.03±0.262  | -1.787±0.418 | 3.28E-04 |
| cg25372693 | 3  | 118959985 | B4GALT4   | -2.795±0.372 | -3.105±0.514 | 3.28E-04 |
| cg02181506 | 14 | 94856984  | SERPINA1  | -2.386±0.324 | -2.064±0.567 | 3.28E-04 |
| cg15915418 | 9  | 84303601  | TLE1      | -1.115±1.364 | -0.345±0.767 | 3.32E-04 |
| cg05781767 | 3  | 127347362 | PODXL2    | 0.142±0.278  | 0.458±0.576  | 3.32E-04 |
| cg05155595 | 2  | 70008161  | ANXA4     | -0.09±0.347  | -0.435±0.61  | 3.33E-04 |
| cg13446199 | 8  | 143762866 | PSCA      | 1.223±0.364  | 1.568±0.6    | 3.33E-04 |
| cg19706602 | 10 | 131265435 | MGMT      | -3.651±0.572 | -3.287±0.479 | 3.33E-04 |
| cg23838531 | 17 | 15902837  | TTC19     | -4.677±0.483 | -4.359±0.439 | 3.33E-04 |
| cg25551168 | 20 | 3065343   | AVP       | 0.836±0.251  | 1.1±0.473    | 3.34E-04 |
| cg02309431 | 20 | 31618931  | BPIFB6    | 2.502±0.225  | 2.224±0.517  | 3.36E-04 |
| cg18302652 | 4  | 74606192  | IL8       | -2.499±0.52  | -2.886±0.589 | 3.37E-04 |
| cg19038540 | 1  | 101701364 | S1PR1     | -4.13±0.493  | -3.514±1.144 | 3.37E-04 |
| cg18043828 | 9  | 12774985  | LURAP1L   | -4.83±0.471  | -4.441±0.64  | 3.37E-04 |
| cg27403635 | 5  | 113698291 | KCNN2     | -3.67±0.585  | -3.139±0.912 | 3.38E-04 |
| cg20200335 | 12 | 52967554  | KRT74     | 2.503±0.304  | 2.242±0.44   | 3.40E-04 |
| cg25415932 | 3  | 9791051   | OGG1      | -2.089±0.452 | -1.724±0.595 | 3.40E-04 |
| cg21238457 | 11 | 75917353  | WNT11     | -4.171±0.398 | -3.788±0.672 | 3.41E-04 |
| cg08040428 | 8  | 18870913  | PSD3      | -3.27±0.283  | -3.019±0.428 | 3.41E-04 |
| cg26611683 | 13 | 41241734  | FOXO1     | -2.911±0.211 | -2.509±0.78  | 3.43E-04 |
| cg26760212 | 20 | 62601743  | ZNF512B   | -0.698±0.26  | -1.019±0.595 | 3.43E-04 |

|            |    |           |              |              |              |          |
|------------|----|-----------|--------------|--------------|--------------|----------|
| cg22030890 | 6  | 146865233 | RAB32        | -2.995±0.422 | -2.588±0.715 | 3.44E-04 |
| cg25438963 | 6  | 26045663  | HIST1H3C     | -3±0.407     | -2.473±0.988 | 3.47E-04 |
| cg07832674 | 3  | 9943884   | IL17RE       | 0.327±0.366  | -0.063±0.704 | 3.48E-04 |
| cg12281657 | 14 | 65016595  | PPP1R36      | -4.468±0.468 | -3.746±1.38  | 3.48E-04 |
| cg27352063 | 10 | 81107211  | PPIF         | -5.755±0.555 | -5.378±0.542 | 3.49E-04 |
| cg07512517 | 7  | 38408106  | LOC100506776 | -0.786±0.32  | -1.154±0.676 | 3.49E-04 |
| cg24497819 | 12 | 109027683 | SELPLG       | 0.152±0.314  | -0.228±0.705 | 3.50E-04 |
| cg10569616 | 7  | 124536676 | POT1         | 1.757±0.403  | 2.042±0.42   | 3.52E-04 |
| cg11492040 | 11 | 2016513   | H19          | 1.278±0.279  | 0.848±0.823  | 3.52E-04 |
| cg08929103 | 17 | 43860355  | CRHR1        | 1.061±0.206  | 0.627±0.848  | 3.53E-04 |
| cg25682080 | 11 | 116663103 | APOA5        | -0.064±0.254 | -0.361±0.548 | 3.57E-04 |
| cg19781251 | 7  | 94294278  | PEG10        | 5.052±0.327  | 4.785±0.441  | 3.57E-04 |
| cg04340502 | 6  | 52775209  | GSTA3        | 0.631±0.307  | 0.208±0.798  | 3.58E-04 |
| cg15381769 | 6  | 128841972 | PTPRK        | -5.072±0.561 | -4.593±0.807 | 3.60E-04 |
| cg01100796 | 1  | 53662040  | CPT2         | -3.271±0.578 | -2.871±0.588 | 3.60E-04 |
| cg01703884 | 12 | 109878174 | MYO1H        | 1.779±0.282  | 1.37±0.78    | 3.61E-04 |
| cg03573747 | 3  | 186560617 | ADIPOQ       | 1.654±0.292  | 1.319±0.616  | 3.62E-04 |
| cg04382920 | 4  | 128651526 | SLC25A31     | 6.079±0.387  | 5.782±0.472  | 3.62E-04 |
| cg06827038 | 17 | 48912952  | WFIKK2       | -0.097±0.215 | 0.203±0.569  | 3.62E-04 |
| cg10080004 | 19 | 55691827  | SYT5         | -3.271±0.486 | -2.811±0.806 | 3.63E-04 |
| cg00807586 | 3  | 38080790  | DLEC1        | -4.256±0.378 | -3.533±1.409 | 3.66E-04 |
| cg08380205 | 3  | 140769691 | SPSB4        | -2.277±0.209 | -1.911±0.708 | 3.66E-04 |
| cg09864712 | 16 | 726786    | RHBDL1       | 4.33±0.602   | 3.566±1.432  | 3.66E-04 |
| cg13950558 | 19 | 45683263  | BLOC1S3      | 1.092±0.302  | 0.759±0.608  | 3.66E-04 |
| cg21803680 | 2  | 216946845 | TMEM169      | -4.663±0.442 | -4.327±0.535 | 3.68E-04 |
| cg22171829 | 7  | 95225520  | PDK4         | -1.619±0.498 | -1.205±0.693 | 3.68E-04 |
| cg00422913 | 17 | 1619022   | MIR22HG      | -4.422±0.331 | -4.178±0.381 | 3.68E-04 |
| cg15616400 | 1  | 16062894  | SLC25A34     | 2.593±0.368  | 3.172±1.111  | 3.68E-04 |
| cg19279346 | 19 | 54785518  | MIR4752      | 1.206±0.266  | 0.854±0.665  | 3.68E-04 |
| cg24432073 | 4  | 76555634  | CDKL2        | -4.199±0.324 | -4.659±0.876 | 3.70E-04 |
| cg14984920 | 7  | 25164393  | CYCS         | -3.76±0.59   | -4.191±0.667 | 3.72E-04 |
| cg16319213 | 21 | 47742881  | C21orf58     | -4.286±0.451 | -4.693±0.703 | 3.74E-04 |
| cg05894797 | 1  | 227058941 | PSEN2        | -3.294±0.359 | -3.018±0.443 | 3.75E-04 |
| cg06101324 | 1  | 152955543 | SPRR1A       | -0.64±0.268  | -1.186±1.068 | 3.75E-04 |
| cg22417398 | 11 | 65293094  | SCYL1        | -3.705±0.265 | -3.482±0.375 | 3.75E-04 |
| cg05484458 | 12 | 6949260   | GNB3         | 1.411±0.249  | 1.119±0.542  | 3.75E-04 |
| cg15616083 | 20 | 62104607  | KCNQ2        | -1.081±0.275 | -0.753±0.609 | 3.77E-04 |
| cg20492912 | 11 | 118230053 | UBE4A        | -0.553±0.266 | -0.904±0.663 | 3.77E-04 |
| cg26507477 | 1  | 104197869 | AMY1A        | 0.539±0.183  | 0.368±0.299  | 3.77E-04 |
| cg21208104 | 4  | 119273361 | PRSS12       | -3.685±0.543 | -3.134±0.991 | 3.78E-04 |
| cg20114394 | 3  | 120170441 | FSTL1        | 1.382±0.299  | 1.762±0.713  | 3.78E-04 |
| cg18877514 | 12 | 133262879 | POLE         | 2.857±0.4    | 2.49±0.64    | 3.79E-04 |
| cg02255609 | 1  | 55181269  | TTC4         | -3.508±0.269 | -3.066±0.853 | 3.80E-04 |
| cg22374142 | 16 | 67198725  | HSF4         | -2.916±0.35  | -2.129±1.55  | 3.81E-04 |
| cg08209133 | 4  | 48485624  | SLC10A4      | -1.931±0.278 | -1.578±0.663 | 3.81E-04 |
| cg10806140 | 7  | 37956554  | SFRP4        | -4.606±0.359 | -4.24±0.66   | 3.82E-04 |
| cg12382902 | 12 | 4383699   | CCND2        | -5.613±0.599 | -4.862±1.411 | 3.82E-04 |
| cg04008901 | 7  | 82072779  | CACNA2D1     | -3.009±0.48  | -2.514±0.893 | 3.82E-04 |
| cg02664205 | 6  | 136171652 | PDE7B        | 2.893±0.189  | 2.72±0.303   | 3.82E-04 |
| cg11504739 | 11 | 62186060  | SCGB1A1      | 2.129±0.238  | 1.816±0.592  | 3.84E-04 |
| cg08717396 | 6  | 27100775  | HIST1H2AG    | -3.821±0.758 | -2.883±1.758 | 3.84E-04 |
| cg11953334 | 19 | 48897863  | GRIN2D       | -3.232±0.27  | -2.756±0.928 | 3.85E-04 |
| cg13591701 | 17 | 66597007  | FAM20A       | -2.159±0.321 | -1.914±0.391 | 3.85E-04 |
| cg02742971 | 2  | 19558059  | OSR1         | -4.706±0.486 | -4.298±0.687 | 3.86E-04 |
| cg12095167 | 8  | 61428991  | RAB2A        | -2.635±0.477 | -3.006±0.599 | 3.86E-04 |
| cg12113132 | 15 | 43476923  | CCNDBP1      | 0.457±0.226  | 0.723±0.494  | 3.87E-04 |
| cg24435704 | 7  | 139763773 | PARP12       | 3.324±0.345  | 2.941±0.703  | 3.87E-04 |
| cg11719283 | 19 | 42574717  | 0            | 1.653±0.209  | 1.872±0.397  | 3.88E-04 |
| cg23181170 | 5  | 170210672 | GABRP        | 1.672±0.25   | 1.439±0.409  | 3.90E-04 |
| cg02519806 | 4  | 119810036 | SYNPO2       | -4.459±0.483 | -3.748±1.364 | 3.90E-04 |
| cg12067287 | 18 | 3221598   | MYOM1        | 1.954±0.281  | 1.657±0.542  | 3.91E-04 |
| cg15272690 | 16 | 58284024  | CCDC113      | -4.249±0.306 | -4.427±0.201 | 3.91E-04 |
| cg23278885 | 20 | 2361431   | TGM6         | 1.42±0.328   | 0.952±0.895  | 3.92E-04 |
| cg11846968 | 20 | 31823545  | BPIFA1       | 1.31±0.307   | 0.902±0.774  | 3.92E-04 |
| cg06834875 | 14 | 100111263 | HHIPL1       | -2.812±0.313 | -2.39±0.802  | 3.93E-04 |
| cg26990660 | 17 | 40913221  | RAMP2        | -4.57±0.527  | -4.088±0.841 | 3.93E-04 |
| cg01625242 | 18 | 56886915  | GRP          | -1.327±0.268 | -1.03±0.547  | 3.93E-04 |
| cg04473030 | 10 | 131354782 | MGMT         | 2.751±0.308  | 2.527±0.347  | 3.94E-04 |
| cg24937126 | 7  | 107643285 | LAMB1        | -5.099±0.555 | -4.689±0.644 | 3.94E-04 |
| cg01909921 | 9  | 135854246 | GFI1B        | -3.773±0.432 | -3.338±0.784 | 3.96E-04 |

|            |    |           |           |              |              |          |
|------------|----|-----------|-----------|--------------|--------------|----------|
| cg25514503 | 1  | 7845070   | PER3      | 2.867±0.327  | 2.345±1.009  | 3.96E-04 |
| cg00176210 | 8  | 41654967  | ANK1      | 0.543±0.228  | 0.919±0.731  | 3.96E-04 |
| cg07619076 | 7  | 55433148  | LANCL2    | -3.051±0.565 | -3.509±0.753 | 3.96E-04 |
| cg27305303 | 2  | 26781231  | OTOF      | -0.78±0.18   | -0.426±0.694 | 3.98E-04 |
| cg10087081 | 19 | 34789667  | KIAA0355  | 0.636±0.295  | 0.874±0.394  | 3.99E-04 |
| cg09088508 | 12 | 122231455 | RHOF      | -5.123±0.481 | -5.42±0.384  | 3.99E-04 |
| cg08302713 | 6  | 53409850  | GCLC      | -3.804±0.241 | -3.082±1.439 | 4.01E-04 |
| cg05492503 | 17 | 19140765  | EPN2      | -5.321±0.518 | -4.995±0.435 | 4.02E-04 |
| cg07173760 | 19 | 40229266  | CLC       | 0.78±0.324   | 0.4±0.711    | 4.02E-04 |
| cg09404633 | 1  | 201915446 | LMOD1     | -1.044±0.263 | -1.357±0.586 | 4.03E-04 |
| cg06506864 | 7  | 34698188  | NPSR1     | 1.113±0.365  | 0.601±0.98   | 4.03E-04 |
| cg25843439 | 19 | 15852574  | OR10H3    | -0.285±0.28  | -0.685±0.768 | 4.05E-04 |
| cg06243556 | 19 | 58609473  | ZSCAN18   | -4.528±0.62  | -3.932±1.063 | 4.05E-04 |
| cg06090864 | 19 | 35842448  | FFAR1     | 3.613±0.54   | 3.09±0.933   | 4.06E-04 |
| cg21378206 | 2  | 113817043 | IL36RN    | 2.549±0.291  | 2.829±0.5    | 4.07E-04 |
| cg04125208 | 11 | 35161229  | CD44      | -4.604±0.323 | -4.795±0.23  | 4.07E-04 |
| cg19817399 | 15 | 75018674  | CYP1A1    | -4.132±0.415 | -3.785±0.587 | 4.08E-04 |
| cg24776407 | 11 | 69061634  | MYEOV     | 2.231±0.28   | 1.794±0.845  | 4.08E-04 |
| cg26780404 | 6  | 75915840  | COL12A1   | -5.185±0.787 | -4.627±0.85  | 4.08E-04 |
| cg24081819 | 8  | 27348940  | EPHX2     | -3.551±0.411 | -3.139±0.744 | 4.10E-04 |
| cg04672450 | 1  | 860185    | SAMD11    | -5.333±0.487 | -4.954±0.621 | 4.10E-04 |
| cg26624914 | 9  | 33448382  | AQP3      | 0.68±0.305   | 1.02±0.629   | 4.11E-04 |
| cg15166050 | 15 | 66857133  | LCTL      | 3.618±0.274  | 3.406±0.345  | 4.12E-04 |
| cg20683151 | 2  | 228243972 | TM4SF20   | 2.729±0.158  | 2.533±0.368  | 4.15E-04 |
| cg10904672 | 1  | 149753367 | FCGR1A    | 1.615±0.227  | 1.338±0.523  | 4.16E-04 |
| cg19546781 | 16 | 57438715  | CCL17     | 3.065±0.36   | 2.809±0.392  | 4.16E-04 |
| cg12998614 | 19 | 917068    | KISS1R    | -3.949±0.467 | -3.6±0.555   | 4.16E-04 |
| cg16728114 | 1  | 156697793 | ISG20L2   | -4.03±0.46   | -4.383±0.573 | 4.18E-04 |
| cg07138512 | 1  | 21996317  | RAP1GAP   | -4.154±0.355 | -3.85±0.522  | 4.19E-04 |
| cg24063470 | 16 | 86600389  | FOXC2     | -4.355±0.481 | -3.943±0.706 | 4.19E-04 |
| cg09775312 | 10 | 93392839  | PPP1R3C   | -5.261±0.545 | -4.653±1.128 | 4.20E-04 |
| cg08496998 | 7  | 5822206   | RNF216    | 2.271±0.393  | 2.562±0.461  | 4.24E-04 |
| cg21832150 | 1  | 902025    | PLEKHN1   | -4.533±0.396 | -4.826±0.466 | 4.26E-04 |
| cg15201877 | 1  | 71512973  | PTGER3    | -2.055±0.272 | -1.605±0.88  | 4.27E-04 |
| cg14480463 | 7  | 1543435   | INTS1     | -3.706±0.413 | -3.224±0.903 | 4.27E-04 |
| cg02435593 | 20 | 32399369  | CHMP4B    | -2.007±0.334 | -2.266±0.423 | 4.27E-04 |
| cg27446233 | 12 | 48516484  | PFKM      | 0.743±0.275  | 1.156±0.799  | 4.29E-04 |
| cg04394102 | 22 | 24321863  | DDT       | -2.399±0.424 | -2.099±0.461 | 4.31E-04 |
| cg24353217 | 12 | 111358188 | MYL2      | 2.118±0.407  | 2.494±0.668  | 4.31E-04 |
| cg10213812 | 17 | 26850322  | FOXN1     | 3.228±0.329  | 2.945±0.487  | 4.32E-04 |
| cg06948408 | 1  | 43736600  | TMEM125   | -3.539±0.543 | -3.929±0.604 | 4.32E-04 |
| cg09106999 | 12 | 56360065  | PMEL      | -2.332±0.296 | -2.044±0.517 | 4.34E-04 |
| cg08459368 | 11 | 61974948  | SCGB2A1   | 1.815±0.312  | 1.47±0.641   | 4.34E-04 |
| cg19008809 | 3  | 53080682  | SFMBT1    | -4.606±0.432 | -4.974±0.633 | 4.34E-04 |
| cg17460095 | 14 | 53418048  | FERMT2    | -4.83±0.36   | -4.538±0.491 | 4.35E-04 |
| cg25836301 | 14 | 101292306 | MEG3      | 0.181±0.133  | 0.383±0.393  | 4.35E-04 |
| cg02324920 | 10 | 105253152 | NEURL     | -0.185±0.216 | 0.055±0.446  | 4.35E-04 |
| cg08349573 | 17 | 77020243  | C1QTNF1   | -5.898±0.588 | -5.37±0.927  | 4.35E-04 |
| cg25552889 | 3  | 184057683 | FAM131A   | 2.461±0.277  | 1.966±0.973  | 4.37E-04 |
| cg15329642 | 1  | 45308298  | PTCH2     | 1.099±0.237  | 0.762±0.65   | 4.37E-04 |
| cg06281795 | 8  | 91095114  | CALB1     | -5.199±0.582 | -4.538±1.237 | 4.41E-04 |
| cg14681629 | 5  | 43041808  | LOC153684 | -3.046±0.364 | -3.469±0.794 | 4.41E-04 |
| cg11139878 | 1  | 157811790 | CD5L      | -1.034±0.262 | -0.554±0.946 | 4.42E-04 |
| cg11158374 | 21 | 43771664  | TFF2      | 1.75±0.166   | 1.51±0.464   | 4.42E-04 |
| cg05701114 | 13 | 50656127  | DLEU1     | -2.581±0.299 | -2.359±0.355 | 4.44E-04 |
| cg11173246 | 11 | 841376    | POLR2L    | -0.563±0.236 | -0.946±0.749 | 4.46E-04 |
| cg00116838 | 19 | 46001746  | PPM1N     | -3.646±0.268 | -3.293±0.678 | 4.47E-04 |
| cg17509872 | 8  | 17105487  | VPS37A    | -3.331±0.314 | -3.107±0.349 | 4.48E-04 |
| cg04155026 | 16 | 67841269  | TSNAXIP1  | -4.046±0.504 | -3.719±0.463 | 4.48E-04 |
| cg26360732 | 3  | 195269834 | PPP1R2    | -3.729±0.396 | -3.446±0.442 | 4.49E-04 |
| cg04450876 | 12 | 54866945  | GTSF1     | 2.684±0.234  | 2.291±0.772  | 4.49E-04 |
| cg11308639 | 2  | 69098272  | BMP10     | 1.176±0.414  | 0.807±0.641  | 4.51E-04 |
| cg12182525 | 4  | 177190321 | ASB5      | 2.36±0.379   | 1.926±0.816  | 4.52E-04 |
| cg24812523 | 14 | 32798762  | AKAP6     | 2.284±0.275  | 2.51±0.384   | 4.54E-04 |
| cg06539449 | 11 | 69461008  | CCND1     | 2.195±0.34   | 2.446±0.4    | 4.55E-04 |
| cg18202456 | 1  | 44584930  | KLF17     | 5.35±0.438   | 5.004±0.575  | 4.56E-04 |
| cg05600174 | 9  | 77704537  | OSTF1     | -3.543±0.481 | -3.094±0.801 | 4.56E-04 |
| cg26158194 | 11 | 1874320   | LSP1      | 1.133±0.402  | 0.671±0.867  | 4.56E-04 |
| cg13117105 | 15 | 69591357  | PAQR5     | -4.183±0.457 | -3.765±0.742 | 4.59E-04 |
| cg05187322 | 17 | 78152328  | CARD14    | 3.083±0.294  | 2.707±0.718  | 4.60E-04 |

|            |    |           |           |              |              |          |
|------------|----|-----------|-----------|--------------|--------------|----------|
| cg22637834 | 1  | 244007281 | AKT3      | 2.788±0.401  | 2.354±0.806  | 4.60E-04 |
| cg25545210 | 17 | 39538417  | KRT34     | 1.979±0.273  | 1.698±0.516  | 4.62E-04 |
| cg21504918 | 5  | 150400001 | GPX3      | -3.179±0.388 | -2.865±0.532 | 4.62E-04 |
| cg18917378 | 20 | 52687007  | BCAS1     | -0.232±0.295 | -0.585±0.669 | 4.63E-04 |
| cg11483915 | 2  | 190446080 | SLC40A1   | -4.245±0.478 | -3.914±0.507 | 4.65E-04 |
| cg15528736 | 19 | 50015780  | FCGRT     | -1.609±0.574 | -1.159±0.75  | 4.67E-04 |
| cg18468844 | 1  | 28503720  | PTAFR     | 1.547±0.476  | 1.889±0.529  | 4.69E-04 |
| cg00949554 | 2  | 181845489 | UBE2E3    | -3.559±0.525 | -3.097±0.809 | 4.70E-04 |
| cg18909638 | 14 | 37666810  | MIPOL1    | -3.197±0.471 | -3.583±0.657 | 4.70E-04 |
| cg14341579 | 13 | 110438906 | IRS2      | -4.493±1.23  | -3.622±1.354 | 4.71E-04 |
| cg06630737 | 1  | 11752109  | DRAXIN    | -4.522±0.531 | -4.013±0.92  | 4.72E-04 |
| cg01605517 | 1  | 247081873 | AHCTF1    | 1.974±0.324  | 2.211±0.376  | 4.72E-04 |
| cg16584172 | 13 | 100633446 | ZIC2      | -3.206±0.257 | -3.472±0.491 | 4.73E-04 |
| cg25965576 | 20 | 23670089  | CST4      | 0.719±0.269  | 0.328±0.763  | 4.73E-04 |
| cg06222851 | 10 | 50970358  | OGDHL     | -4.395±0.616 | -3.759±1.174 | 4.74E-04 |
| cg15301700 | 8  | 145560531 | SCRT1     | -3.773±0.422 | -3.363±0.744 | 4.77E-04 |
| cg09936762 | 10 | 80959688  | ZMIZ1     | 2.206±0.308  | 1.906±0.545  | 4.78E-04 |
| cg18984151 | 3  | 47555476  | ELP6      | -2.277±0.284 | -2.56±0.519  | 4.80E-04 |
| cg03996793 | 19 | 4769537   | MIR7-3HG  | -1.997±0.646 | -1.515±0.775 | 4.81E-04 |
| cg06636463 | 2  | 15731711  | DDX1      | -3.576±0.43  | -3.123±0.841 | 4.81E-04 |
| cg09149294 | 15 | 98503793  | ARRDC4    | -5.353±0.573 | -4.857±0.866 | 4.82E-04 |
| cg01283289 | 12 | 81472177  | ACSS3     | -3.52±0.39   | -3.048±0.9   | 4.84E-04 |
| cg04824716 | 6  | 31125475  | CCHCR1    | 0.066±0.205  | 0.249±0.325  | 4.86E-04 |
| cg26026726 | 19 | 35862414  | 0         | 2.276±0.441  | 1.803±0.881  | 4.87E-04 |
| cg10730174 | 1  | 170633559 | PRRX1     | -4.798±0.574 | -4.187±1.138 | 4.88E-04 |
| cg21030400 | 19 | 2052564   | MKNK2     | 0.215±0.306  | -0.142±0.678 | 4.90E-04 |
| cg22458065 | 6  | 31108108  | PSORS1C2  | 2.402±0.169  | 2.252±0.266  | 4.90E-04 |
| cg06490951 | 18 | 580435    | CETN1     | 4.202±0.463  | 3.856±0.562  | 4.91E-04 |
| cg00431114 | 20 | 43104027  | TTPAL     | -1.769±0.293 | -2.057±0.524 | 4.91E-04 |
| cg00673191 | 21 | 37536923  | DOPEY2    | -1.494±0.378 | -1.098±0.734 | 4.93E-04 |
| cg20304401 | 8  | 101733920 | PABPC1    | -2.312±0.412 | -2.049±0.371 | 4.93E-04 |
| cg21433933 | 5  | 132163083 | SHROOM1   | 1.704±0.249  | 1.908±0.348  | 4.94E-04 |
| cg03375833 | 3  | 9859360   | TTL3      | 1.961±0.517  | 1.605±0.546  | 4.95E-04 |
| cg00617305 | 1  | 201857940 | SHISA4    | -4.966±0.471 | -4.587±0.645 | 4.96E-04 |
| cg13840968 | 14 | 24780926  | LTB4R     | 0.676±0.265  | 1.026±0.676  | 4.96E-04 |
| cg22777952 | 15 | 60296425  | FOXB1     | -3.622±0.364 | -3.024±1.18  | 4.97E-04 |
| cg08460435 | 1  | 109203610 | HENMT1    | -2.666±0.405 | -2.139±1.018 | 4.97E-04 |
| cg12572278 | 11 | 120081259 | OAF       | -4.251±0.347 | -3.853±0.753 | 4.98E-04 |
| cg04107037 | 4  | 94750205  | ATOH1     | -3.159±0.404 | -2.651±0.975 | 4.98E-04 |
| cg06398181 | 18 | 74536226  | ZNF236    | 0.89±0.312   | 1.162±0.474  | 4.99E-04 |
| cg13479669 | 9  | 21994108  | CDKN2A    | -3.974±0.414 | -4.338±0.643 | 5.00E-04 |
| cg02164442 | 16 | 31405101  | ITGAD     | 0.115±0.216  | 0.499±0.763  | 5.00E-04 |
| cg05851163 | 18 | 65183566  | LOC643542 | -4.419±0.406 | -4.089±0.566 | 5.02E-04 |
| cg04914105 | 15 | 75872043  | PTPN9     | -3.643±0.289 | -3.842±0.307 | 5.02E-04 |
| cg04143809 | 2  | 165812322 | SLC38A11  | 1.718±0.305  | 1.993±0.491  | 5.03E-04 |
| cg04325632 | 4  | 3767073   | ADRA2C    | -1.158±0.306 | -1.467±0.571 | 5.03E-04 |
| cg09963123 | 4  | 38664654  | KLF3      | -2.372±0.411 | -1.996±0.675 | 5.03E-04 |
| cg16998353 | 11 | 6495553   | TRIM3     | -4.16±0.45   | -3.827±0.54  | 5.06E-04 |
| cg01578324 | 6  | 31704774  | CLIC1     | 0.021±0.225  | 0.289±0.511  | 5.08E-04 |
| cg13337865 | 17 | 6734991   | TEKT1     | -4.1±0.348   | -3.66±0.849  | 5.11E-04 |
| cg08084415 | 19 | 32836414  | ZNF507    | -3.765±0.437 | -4.05±0.415  | 5.12E-04 |
| cg00158308 | 13 | 97646341  | OXGR1     | -2.601±0.38  | -2.018±1.149 | 5.18E-04 |
| cg12513481 | 17 | 46507830  | SKAP1     | -0.411±0.391 | -0.934±1.015 | 5.18E-04 |
| cg19947621 | 9  | 34263021  | KIF24     | 1.491±0.361  | 1.141±0.64   | 5.18E-04 |
| cg07997737 | 19 | 5822630   | NRTN      | -0.368±0.251 | -0.661±0.558 | 5.19E-04 |
| cg07612655 | 20 | 48185517  | PTGIS     | -0.586±0.255 | -0.195±0.771 | 5.19E-04 |
| cg06742978 | 12 | 50451907  | ASIC1     | -4.656±0.42  | -4.279±0.673 | 5.21E-04 |
| cg05719902 | 7  | 138348774 | SVOPL     | 0.316±0.368  | -0.04±0.65   | 5.22E-04 |
| cg14345882 | 6  | 26364793  | BTN3A2    | -0.244±0.443 | -0.673±0.786 | 5.22E-04 |
| cg15014549 | 17 | 19437003  | SLC47A1   | -3.933±0.302 | -3.666±0.474 | 5.22E-04 |
| cg23984434 | 11 | 106888656 | GUCY1A2   | -3.592±0.43  | -2.892±1.387 | 5.23E-04 |
| cg18931888 | 3  | 137851874 | A4GNT     | 2.467±0.293  | 2.187±0.51   | 5.23E-04 |
| cg08375941 | 3  | 98250382  | GPR15     | 1.014±0.244  | 0.722±0.553  | 5.24E-04 |
| cg25990647 | 8  | 54164081  | OPRK1     | -3.857±0.544 | -3.319±0.99  | 5.24E-04 |
| cg11523020 | 22 | 45681036  | UPK3A     | -0.915±0.242 | -1.154±0.44  | 5.24E-04 |
| cg08654655 | 1  | 159141063 | CADM3     | -1.77±0.416  | -1.338±0.805 | 5.25E-04 |
| cg08801754 | 5  | 132363022 | ZCCHC10   | 1.68±0.248   | 1.501±0.286  | 5.26E-04 |
| cg13097816 | 2  | 241568439 | GPR35     | 0.03±0.341   | 0.42±0.741   | 5.27E-04 |
| cg09970593 | 1  | 29139522  | OPRD1     | 0.515±0.321  | 0.083±0.84   | 5.27E-04 |
| cg21409833 | 1  | 63062724  | ANGPTL3   | 1.937±0.393  | 2.212±0.423  | 5.27E-04 |

|            |    |           |            |              |              |          |
|------------|----|-----------|------------|--------------|--------------|----------|
| cg05517711 | 9  | 130662451 | ST6GALNAC6 | -0.974±0.306 | -0.632±0.648 | 5.28E-04 |
| cg20158826 | 11 | 66359489  | CCDC87     | 2.172±0.283  | 1.928±0.429  | 5.30E-04 |
| cg09234474 | 17 | 35850659  | DUSP14     | -3.714±0.33  | -3.478±0.375 | 5.30E-04 |
| cg18248112 | 21 | 39629123  | KCNJ15     | 1.48±0.264   | 0.873±1.227  | 5.31E-04 |
| cg19180828 | 1  | 6265220   | RNF207     | -2.45±0.415  | -1.96±0.937  | 5.31E-04 |
| cg20025970 | 12 | 22089560  | ABCC9      | 0.914±0.266  | 0.523±0.761  | 5.32E-04 |
| cg20994801 | 1  | 9711398   | PIK3CD     | 0.081±0.304  | 0.487±0.791  | 5.33E-04 |
| cg22747092 | 9  | 138987818 | NACC2      | -1.92±0.518  | -1.463±0.812 | 5.34E-04 |
| cg14430151 | 4  | 8440600   | ACOX3      | 1.748±0.476  | 1.147±1.162  | 5.35E-04 |
| cg24022301 | 1  | 78956570  | PTGFR      | -3.509±0.391 | -3.165±0.612 | 5.37E-04 |
| cg13673094 | 1  | 198608361 | PTPRC      | 0.17±0.379   | 0.616±0.855  | 5.37E-04 |
| cg27257408 | 15 | 78526836  | ACSBG1     | 2.368±0.215  | 2.141±0.424  | 5.37E-04 |
| cg16994506 | 12 | 4383724   | CCND2      | -4.216±0.509 | -3.744±0.855 | 5.38E-04 |
| cg07595943 | 16 | 84224901  | ADAD2      | 4.248±0.593  | 3.771±0.817  | 5.38E-04 |
| cg23276695 | 6  | 88855716  | CNR1       | 0.623±0.221  | 0.26±0.724   | 5.40E-04 |
| cg20289949 | 2  | 43019614  | HAAO       | -1.62±0.219  | -1.216±0.809 | 5.40E-04 |
| cg18611122 | 1  | 150947896 | CERS2      | 0.158±0.383  | 0.715±1.097  | 5.40E-04 |
| cg08261841 | 7  | 142982463 | TMEM139    | 1.475±0.256  | 0.947±1.063  | 5.41E-04 |
| cg04305913 | 9  | 139228912 | GPSM1      | 2.238±0.328  | 1.998±0.39   | 5.41E-04 |
| cg22356117 | 3  | 182881427 | LAMP3      | 1.381±0.393  | 1.639±0.38   | 5.43E-04 |
| cg03843978 | 4  | 4864625   | MSX1       | -0.159±0.125 | 0.069±0.457  | 5.47E-04 |
| cg09339527 | 5  | 178322752 | ZFP2       | -2.817±0.595 | -2.318±0.86  | 5.47E-04 |
| cg11052143 | 2  | 202484020 | ALS2CR11   | -1.227±0.407 | -0.736±0.944 | 5.48E-04 |
| cg13960192 | 19 | 3093904   | GNA11      | -3.13±0.437  | -2.775±0.611 | 5.50E-04 |
| cg14681055 | 10 | 104001261 | PITX3      | -4.697±0.429 | -3.955±1.484 | 5.51E-04 |
| cg20909686 | 11 | 65554042  | OVOL1      | -2.553±0.413 | -2.274±0.425 | 5.51E-04 |
| cg01160766 | 17 | 72199871  | RPL38      | -3.334±0.467 | -3.67±0.54   | 5.52E-04 |
| cg17165284 | 19 | 10829165  | MIR638     | -2.828±0.361 | -2.576±0.397 | 5.52E-04 |
| cg18905252 | 2  | 131356362 | CFC1       | -0.515±0.238 | -0.142±0.742 | 5.53E-04 |
| cg11078738 | 2  | 69240453  | ANTXR1     | -4.398±0.334 | -4.057±0.635 | 5.53E-04 |
| cg03549571 | 12 | 49488198  | DHH        | -5.16±0.619  | -4.646±0.899 | 5.54E-04 |
| cg20724073 | 17 | 40719654  | MLX        | -5.548±0.411 | -5.811±0.381 | 5.55E-04 |
| cg08896945 | 11 | 15095068  | CALCB      | -3.022±0.424 | -2.572±0.846 | 5.57E-04 |
| cg17725472 | 1  | 203198757 | CHIT1      | 4.079±0.326  | 3.755±0.601  | 5.59E-04 |
| cg06614002 | 22 | 38380439  | SOX10      | 3.307±0.39   | 2.851±0.875  | 5.59E-04 |
| cg25984124 | 20 | 5106245   | PCNA       | 0.941±0.431  | 1.223±0.419  | 5.59E-04 |
| cg00077877 | 8  | 131414474 | ASAP1      | 0.438±0.275  | -0.036±0.949 | 5.64E-04 |
| cg17642353 | 19 | 43423265  | PSG6       | 2.472±0.346  | 2.165±0.551  | 5.66E-04 |
| cg17928268 | 20 | 23433503  | CST11      | 0.124±0.213  | -0.2±0.641   | 5.67E-04 |
| cg21481775 | 8  | 23539627  | NKX3-1     | -3.472±0.363 | -3.169±0.531 | 5.67E-04 |
| cg20812929 | 14 | 24458345  | DHRS4L2    | -1.225±0.479 | -1.69±0.859  | 5.67E-04 |
| cg25475443 | 10 | 125806388 | CHST15     | 2.088±0.195  | 1.915±0.31   | 5.68E-04 |
| cg20102673 | 12 | 49933539  | KCNH3      | -2.291±0.354 | -1.962±0.6   | 5.68E-04 |
| cg17653969 | 1  | 229439834 | SPHAR      | 1.804±0.262  | 1.976±0.253  | 5.71E-04 |
| cg18152517 | 7  | 134915756 | STRA8      | 2.399±0.292  | 1.933±0.93   | 5.73E-04 |
| cg14310034 | 14 | 54423433  | BMP4       | -4.462±0.468 | -4.076±0.672 | 5.73E-04 |
| cg26260350 | 2  | 63277932  | OTX1       | -4.83±0.514  | -5.195±0.586 | 5.73E-04 |
| cg20229788 | 2  | 27718498  | FNDC4      | -2.459±0.382 | -2.11±0.631  | 5.73E-04 |
| cg09396217 | 8  | 108510286 | ANGPT1     | -0.996±0.32  | -0.543±0.888 | 5.76E-04 |
| cg11511443 | 12 | 16761406  | LMO3       | -0.276±0.369 | -0.65±0.694  | 5.76E-04 |
| cg12605747 | 15 | 66798443  | ZWILCH     | -1.202±0.315 | -0.889±0.543 | 5.77E-04 |
| cg11147193 | 2  | 10442040  | HPCAL1     | -0.28±0.264  | -0.572±0.558 | 5.77E-04 |
| cg16152813 | 16 | 30042407  | FAM57B     | -3.983±0.455 | -3.585±0.712 | 5.79E-04 |
| cg14155416 | 18 | 6414330   | L3MBTL4    | -2.932±0.595 | -2.476±0.768 | 5.80E-04 |
| cg15415507 | 1  | 16482553  | EPHA2      | -2.1±0.368   | -1.87±0.327  | 5.82E-04 |
| cg26014197 | 16 | 3143153   | ZSCAN10    | 1.904±0.287  | 1.557±0.673  | 5.83E-04 |
| cg17469479 | 12 | 10183208  | CLEC9A     | 3.891±0.461  | 4.281±0.69   | 5.84E-04 |
| cg21905630 | 4  | 54965904  | GSX2       | -3.448±0.245 | -3.667±0.397 | 5.84E-04 |
| cg25040783 | 3  | 57261306  | APPL1      | -3.515±0.457 | -3.21±0.463  | 5.85E-04 |
| cg00245878 | 7  | 64450875  | ZNF117     | 2.279±0.218  | 1.741±1.1    | 5.85E-04 |
| cg25283297 | 20 | 57430916  | GNAS       | 1.281±0.18   | 1.079±0.386  | 5.86E-04 |
| cg19403377 | 17 | 53800225  | TMEM100    | -2.41±0.363  | -1.965±0.863 | 5.89E-04 |
| cg23762517 | 1  | 42384310  | HIVEP3     | -2.609±0.492 | -2.148±0.847 | 5.91E-04 |
| cg01151699 | 22 | 37099259  | CACNG2     | -4.611±0.417 | -4.144±0.893 | 5.92E-04 |
| cg20793071 | 1  | 54520450  | TCEANC2    | -0.399±0.355 | -0.058±0.624 | 5.92E-04 |
| cg25141490 | 5  | 148759090 | IL17B      | 1.51±0.25    | 1.138±0.741  | 5.95E-04 |
| cg22833175 | 12 | 14957520  | C12orf60   | 0.573±0.257  | 0.846±0.518  | 5.95E-04 |
| cg06973652 | 17 | 41278622  | NBR2       | 2.36±0.452   | 1.688±1.338  | 5.96E-04 |
| cg13164309 | 1  | 20898017  | 0          | 0.473±0.28   | 0.071±0.797  | 5.98E-04 |
| cg04518155 | 4  | 170679294 | C4orf27    | -4.844±0.338 | -5.158±0.575 | 5.98E-04 |

|            |    |           |            |              |              |          |
|------------|----|-----------|------------|--------------|--------------|----------|
| cg19192120 | 11 | 67070517  | SSH3       | -3.282±0.488 | -2.915±0.614 | 5.99E-04 |
| cg10106388 | 1  | 160832662 | CD244      | -1.769±0.4   | -2.346±1.146 | 6.01E-04 |
| cg02251134 | 5  | 169063563 | DOCK2      | -0.285±0.289 | -0.588±0.573 | 6.03E-04 |
| cg21022395 | 10 | 112722440 | SHOC2      | 1.999±0.337  | 1.669±0.615  | 6.05E-04 |
| cg21402035 | 22 | 38219400  | GALR3      | 1.094±0.225  | 0.807±0.56   | 6.05E-04 |
| cg19136075 | 1  | 19968885  | NBL1       | 0.887±0.3    | 0.605±0.519  | 6.05E-04 |
| cg01785568 | 4  | 4864833   | MSX1       | 0.427±0.27   | 0.056±0.733  | 6.17E-04 |
| cg14315198 | 17 | 26879866  | UNC119     | -0.535±0.186 | -0.26±0.548  | 6.18E-04 |
| cg06132694 | 4  | 118955172 | NDST3      | -4.673±0.489 | -4.193±0.896 | 6.20E-04 |
| cg19789505 | 1  | 228394509 | OBSCN      | 0.675±0.187  | 0.398±0.553  | 6.21E-04 |
| cg00466436 | 20 | 123163    | DEFB126    | 0.41±0.248   | 0.025±0.772  | 6.24E-04 |
| cg25473396 | 16 | 126819    | MPG        | -4.109±0.548 | -3.698±0.691 | 6.25E-04 |
| cg16396948 | 3  | 111603394 | PHLDB2     | 2.483±0.205  | 2.639±0.264  | 6.27E-04 |
| cg16880396 | 7  | 101928206 | SH2B2      | 0.078±0.202  | 0.383±0.608  | 6.30E-04 |
| cg24311382 | 6  | 132272408 | CTGF       | -4.159±0.812 | -3.586±0.926 | 6.30E-04 |
| cg06552050 | 12 | 10875369  | YBX3       | -5.471±0.457 | -5.09±0.672  | 6.31E-04 |
| cg02218260 | 3  | 51742878  | GRM2       | 2.196±0.216  | 1.986±0.391  | 6.31E-04 |
| cg00888479 | 20 | 19193824  | SLC24A3    | -2.681±0.478 | -2.18±0.952  | 6.34E-04 |
| cg26504021 | 5  | 2752882   | C5orf38    | -2.801±0.428 | -2.401±0.738 | 6.35E-04 |
| cg17686885 | 17 | 52977769  | TOM1L1     | -2.577±0.362 | -2.881±0.542 | 6.35E-04 |
| cg15784615 | 12 | 6493767   | LTBR       | -1.096±0.383 | -0.718±0.707 | 6.36E-04 |
| cg23363832 | 3  | 139258939 | RBP1       | -3.138±0.439 | -2.719±0.778 | 6.38E-04 |
| cg19525717 | 20 | 43160249  | PKIG       | -1.773±0.354 | -2.098±0.598 | 6.38E-04 |
| cg21615171 | 3  | 38307564  | SLC22A13   | 2.871±0.173  | 2.723±0.265  | 6.39E-04 |
| cg19561774 | 6  | 160679690 | SLC22A2    | 2.982±0.219  | 2.818±0.275  | 6.41E-04 |
| cg14473016 | 22 | 35937495  | RASD2      | -4.343±0.439 | -4.006±0.575 | 6.43E-04 |
| cg22539738 | 13 | 45562280  | NUFIP1     | 2.875±0.323  | 2.603±0.484  | 6.45E-04 |
| cg21611708 | 20 | 2277040   | TGM3       | 0.705±0.363  | 1.162±0.883  | 6.46E-04 |
| cg05253159 | 7  | 101928560 | SH2B2      | -0.322±0.162 | -0.058±0.531 | 6.46E-04 |
| cg02043070 | 14 | 105190158 | ADSSL1     | -5.047±0.448 | -5.333±0.419 | 6.48E-04 |
| cg14037665 | 2  | 1748617   | PXDN       | -3.904±0.498 | -3.453±0.825 | 6.49E-04 |
| cg15045441 | 6  | 72130432  | LINC00472  | -4.049±0.519 | -3.601±0.806 | 6.52E-04 |
| cg14534464 | 7  | 26191633  | NFE2L3     | -4.292±0.459 | -4.598±0.474 | 6.53E-04 |
| cg20051033 | 3  | 9746059   | CPNE9      | -2.547±0.401 | -2.191±0.649 | 6.53E-04 |
| cg10479672 | 2  | 113810641 | IL36B      | 0.223±0.286  | 0.598±0.744  | 6.59E-04 |
| cg26359240 | 16 | 84179959  | DNAAF1     | 3.005±0.274  | 2.774±0.415  | 6.59E-04 |
| cg08828036 | 15 | 26109204  | ATP10A     | 1.006±0.303  | 1.283±0.509  | 6.59E-04 |
| cg01985396 | 6  | 39760833  | DAAM2      | -0.473±0.277 | -0.182±0.556 | 6.60E-04 |
| cg08462247 | 2  | 241075202 | MYEOV2     | -3.424±0.367 | -3.099±0.594 | 6.60E-04 |
| cg25712380 | 22 | 40297826  | GRAP2      | 1.641±0.335  | 1.243±0.777  | 6.60E-04 |
| cg01602596 | 17 | 39743526  | KRT14      | 1.251±0.204  | 1.49±0.464   | 6.62E-04 |
| cg09303642 | 12 | 54690818  | NFE2       | 1.837±0.384  | 2.161±0.58   | 6.66E-04 |
| cg07605143 | 19 | 48827843  | EMP3       | 1.464±0.33   | 1.694±0.363  | 6.67E-04 |
| cg19646028 | 19 | 4769240   | MIR7-3HG   | -1.885±0.409 | -1.538±0.623 | 6.70E-04 |
| cg22490255 | 12 | 58138949  | TPAN31     | -5.094±0.478 | -4.617±0.902 | 6.72E-04 |
| cg15916061 | 6  | 25754219  | SLC17A4    | 0.799±0.272  | 1.154±0.705  | 6.74E-04 |
| cg11513856 | 7  | 100965680 | RABL5      | -0.346±0.252 | -0.655±0.607 | 6.76E-04 |
| cg09088834 | 20 | 25565460  | NINL       | -1.815±0.335 | -1.423±0.767 | 6.76E-04 |
| cg05706061 | 9  | 115912974 | SLC31A2    | -1.895±0.372 | -1.601±0.497 | 6.77E-04 |
| cg03986640 | 12 | 56848355  | MIP        | 2.001±0.275  | 1.706±0.567  | 6.78E-04 |
| cg06374075 | 17 | 42836931  | ADAM11     | -3.245±0.224 | -2.923±0.644 | 6.83E-04 |
| cg07150830 | 17 | 26127542  | NOS2       | 4.156±0.315  | 3.81±0.668   | 6.84E-04 |
| cg05443740 | 2  | 95963057  | KCNIP3     | -4.545±0.492 | -4.195±0.575 | 6.87E-04 |
| cg14076161 | 12 | 11463379  | PRB4       | 0.358±0.246  | -0.011±0.743 | 6.88E-04 |
| cg06284244 | 18 | 813059    | YES1       | -4.583±0.335 | -4.85±0.466  | 6.88E-04 |
| cg19292008 | 9  | 100615796 | FOXE1      | -4.085±0.364 | -3.57±1.032  | 6.89E-04 |
| cg21553596 | 21 | 42688635  | FAM3B      | -3.808±0.582 | -3.318±0.88  | 6.92E-04 |
| cg19836283 | 15 | 68724690  | ITGA11     | -3.949±0.484 | -3.534±0.75  | 6.97E-04 |
| cg06584407 | 1  | 11907324  | NPPA       | 2.604±0.212  | 2.445±0.268  | 6.97E-04 |
| cg08016383 | 15 | 100882020 | ADAMTS17   | -4.429±0.468 | -3.931±0.958 | 6.99E-04 |
| cg18294257 | 22 | 30867673  | SEC14L3    | -0.974±0.356 | -1.295±0.591 | 7.01E-04 |
| cg11757293 | 8  | 145692581 | KIFC2      | -2.181±0.354 | -2.425±0.393 | 7.02E-04 |
| cg02016419 | 17 | 15245237  | TEKT3      | -0.618±0.277 | -0.932±0.611 | 7.03E-04 |
| cg04460372 | 9  | 130661175 | ST6GALNAC6 | -3.973±0.514 | -3.593±0.641 | 7.03E-04 |
| cg09986574 | 9  | 135544256 | GTF3C4     | 1.037±0.239  | 1.212±0.295  | 7.03E-04 |
| cg03133269 | 1  | 22468902  | WNT4       | -4.166±0.42  | -3.859±0.515 | 7.03E-04 |
| cg20699736 | 2  | 71127226  | VAX2       | -4.154±0.46  | -3.789±0.641 | 7.05E-04 |
| cg06940574 | 1  | 6297128   | LINC00337  | 3.53±0.197   | 3.367±0.291  | 7.05E-04 |
| cg25995916 | 12 | 108155205 | PRDM4      | -3.907±0.22  | -4.05±0.215  | 7.09E-04 |
| cg25151806 | 6  | 11045370  | ELOVL2-AS1 | 2.243±0.398  | 2.526±0.466  | 7.11E-04 |

|            |    |           |               |              |              |          |
|------------|----|-----------|---------------|--------------|--------------|----------|
| cg20436912 | 22 | 30902642  | SEC14L4       | 0.01±0.169   | -0.234±0.493 | 7.12E-04 |
| cg15612436 | 22 | 43897902  | MPPED1        | -1.107±0.297 | -1.436±0.639 | 7.12E-04 |
| cg03097995 | 19 | 55669091  | TNNI3         | -0.974±0.367 | -0.637±0.626 | 7.13E-04 |
| cg10731022 | 5  | 139927252 | EIF4EBP3      | -5.954±0.594 | -5.351±1.15  | 7.14E-04 |
| cg21553524 | 2  | 39893185  | TMEM178A      | -5.668±0.642 | -4.935±1.432 | 7.24E-04 |
| cg18530324 | 18 | 46064992  | CTIF          | -0.522±0.338 | -0.116±0.801 | 7.25E-04 |
| cg16847051 | 12 | 54121714  | CALCOCO1      | -3.432±0.269 | -3.605±0.264 | 7.26E-04 |
| cg25461905 | 1  | 178481807 | TEX35         | 3.951±0.342  | 3.705±0.41   | 7.29E-04 |
| cg11896271 | 22 | 50609327  | PANX2         | -2.984±0.619 | -2.56±0.682  | 7.30E-04 |
| cg04719491 | 8  | 122654045 | HAS2          | -4.634±0.431 | -4.263±0.674 | 7.31E-04 |
| cg24317255 | 6  | 153452233 | RGS17         | -3.854±0.38  | -3.452±0.777 | 7.33E-04 |
| cg01185080 | 15 | 90543813  | ZNF710        | -0.681±0.375 | -0.32±0.682  | 7.33E-04 |
| cg25234611 | 1  | 1371347   | VWA1          | -3.195±0.691 | -2.681±0.875 | 7.34E-04 |
| cg06650260 | 1  | 27240478  | NR0B2         | 1.009±0.24   | 0.505±1.043  | 7.34E-04 |
| cg26170660 | 6  | 28493601  | GPX5          | -1.374±0.376 | -1.881±1.016 | 7.34E-04 |
| cg22802439 | 19 | 36157825  | UPK1A         | 1.278±0.339  | 0.883±0.778  | 7.36E-04 |
| cg12658982 | 7  | 29603541  | PRR15         | -4.965±0.485 | -4.333±1.262 | 7.38E-04 |
| cg05112299 | 19 | 14991491  | OR7A17        | -0.353±0.156 | -0.628±0.566 | 7.39E-04 |
| cg23910243 | 16 | 31484618  | TGFB111       | 0.156±0.335  | 0.652±1.006  | 7.40E-04 |
| cg08996986 | 19 | 55583563  | 0             | 2.715±0.44   | 3.038±0.545  | 7.41E-04 |
| cg20797766 | 16 | 2770866   | PRSS27        | -4.171±0.421 | -4.442±0.411 | 7.41E-04 |
| cg13482485 | 1  | 99127787  | SNX7          | -3.607±0.291 | -3.386±0.38  | 7.43E-04 |
| cg03327494 | 3  | 195938048 | ZDHHC19       | 2.164±0.186  | 2.331±0.309  | 7.45E-04 |
| cg14566624 | 1  | 6321582   | GPR153        | -2.968±0.402 | -2.534±0.844 | 7.45E-04 |
| cg06765947 | 3  | 126236742 | UROC1         | 2.625±0.25   | 2.367±0.495  | 7.48E-04 |
| cg17454897 | 19 | 8675471   | ADAMTS10      | -5.869±0.744 | -5.17±1.313  | 7.51E-04 |
| cg10316635 | 1  | 62208645  | INADL         | -4.012±0.65  | -3.571±0.705 | 7.52E-04 |
| cg27196467 | 4  | 21305490  | KCNIP4        | -1.689±0.373 | -2.138±0.891 | 7.58E-04 |
| cg21177096 | 2  | 20212440  | MATN3         | -4.72±0.617  | -4.229±0.869 | 7.61E-04 |
| cg20972495 | 3  | 42624879  | SEC22C        | 2.421±0.144  | 2.324±0.155  | 7.62E-04 |
| cg04037952 | 2  | 131486950 | GPR148        | 4.815±0.331  | 4.33±0.983   | 7.64E-04 |
| cg25437402 | 11 | 85779802  | PICALM        | -6.293±0.737 | -5.85±0.622  | 7.65E-04 |
| cg13765961 | 11 | 60223238  | MS4A1         | 1.121±0.303  | 0.715±0.817  | 7.65E-04 |
| cg02099418 | 2  | 204571146 | CD28          | 0.561±0.412  | 0.134±0.826  | 7.66E-04 |
| cg26790059 | 5  | 156772562 | FNDC9         | 2.879±0.435  | 2.465±0.782  | 7.67E-04 |
| cg19467928 | 16 | 16317435  | ABCC6         | -5.311±0.595 | -4.861±0.776 | 7.67E-04 |
| cg24739326 | 19 | 34175354  | CHST8         | -2.627±0.464 | -2.288±0.576 | 7.69E-04 |
| cg10708675 | 16 | 69760758  | NQO1          | -3.803±0.382 | -4.092±0.5   | 7.69E-04 |
| cg22764341 | 4  | 47487088  | ATP10D        | -3.351±0.408 | -3.056±0.498 | 7.70E-04 |
| cg01294695 | 15 | 90294640  | MESP1         | -3.177±0.344 | -3.468±0.53  | 7.71E-04 |
| cg00135393 | 4  | 155533661 | FGG           | -0.807±0.276 | -1.127±0.631 | 7.72E-04 |
| cg06207804 | 1  | 44398998  | ARTN          | -1.438±0.262 | -1.714±0.535 | 7.73E-04 |
| cg21307628 | 3  | 112360952 | CCDC80        | 1.669±0.325  | 1.298±0.73   | 7.74E-04 |
| cg09906458 | 20 | 4702581   | PRND          | 0.564±0.28   | 0.227±0.668  | 7.79E-04 |
| cg21663722 | 20 | 26034952  | FAM182A       | 1.479±0.201  | 1.248±0.453  | 7.80E-04 |
| cg02676865 | 10 | 99259738  | UBTD1         | -2.586±0.489 | -2.194±0.699 | 7.81E-04 |
| cg01450842 | 2  | 48796213  | STON1-GTF2A1L | 2.472±0.381  | 2.144±0.6    | 7.82E-04 |
| cg23995778 | 19 | 49546855  | CGB5          | -0.039±0.107 | 0.068±0.204  | 7.86E-04 |
| cg20784775 | 12 | 29937585  | TMTC1         | -2.512±0.353 | -2.21±0.553  | 7.87E-04 |
| cg23855121 | 4  | 38784938  | TLR10         | 1.236±0.224  | 0.969±0.529  | 7.90E-04 |
| cg06806711 | 11 | 60223291  | MS4A1         | 0.775±0.316  | 0.323±0.918  | 7.91E-04 |
| cg00689340 | 2  | 74668672  | RTKN          | -0.508±0.343 | -0.874±0.713 | 7.92E-04 |
| cg25422943 | 13 | 67804733  | PCDH9         | -5.537±0.641 | -4.984±1.017 | 7.95E-04 |
| cg21948655 | 1  | 152849738 | SMCP          | 3.102±0.397  | 2.366±1.524  | 7.97E-04 |
| cg17173856 | 11 | 88782137  | GRM5          | 1.24±0.344   | 0.887±0.671  | 7.97E-04 |
| cg18638931 | 22 | 50528179  | MOV10L1       | 0.634±0.286  | 0.967±0.659  | 7.98E-04 |
| cg24646513 | 12 | 107380499 | MTERFD3       | -4.116±0.549 | -3.764±0.539 | 7.98E-04 |
| cg13718960 | 14 | 21271313  | RNASE1        | -0.022±0.341 | -0.428±0.805 | 7.98E-04 |
| cg19693403 | 3  | 119962884 | GPR156        | 3.228±0.278  | 3.017±0.366  | 7.99E-04 |
| cg15692239 | 17 | 26903955  | ALDOC         | -5.366±0.567 | -4.631±1.476 | 8.00E-04 |
| cg26365668 | 4  | 84375973  | HELQ          | -0.795±0.292 | -0.339±0.934 | 8.02E-04 |
| cg09845785 | 2  | 183387501 | PDE1A         | -2.592±0.453 | -1.998±1.197 | 8.02E-04 |
| cg14080001 | 15 | 75940555  | SNX33         | -4.418±0.327 | -4.184±0.395 | 8.03E-04 |
| cg11871280 | 12 | 60082038  | SLC16A7       | 2.551±0.316  | 2.142±0.824  | 8.04E-04 |
| cg25670376 | 17 | 49295249  | MBTD1         | 1.473±0.338  | 1.111±0.699  | 8.05E-04 |
| cg08472583 | 7  | 65580288  | CRCP          | -3.482±0.479 | -3.008±0.909 | 8.06E-04 |
| cg16034652 | 14 | 93798309  | BTBD7         | -0.774±0.288 | -1.074±0.583 | 8.07E-04 |
| cg04614339 | 1  | 196743672 | CFHR3         | 0.041±0.281  | -0.338±0.765 | 8.08E-04 |
| cg12739034 | 1  | 71513626  | PTGER3        | -4.135±0.31  | -3.683±0.921 | 8.09E-04 |
| cg14876043 | 19 | 55458730  | NLRP7         | 2.44±0.346   | 2.05±0.768   | 8.11E-04 |

|            |    |           |                  |              |              |          |
|------------|----|-----------|------------------|--------------|--------------|----------|
| cg02679745 | 9  | 139927646 | <i>FUT7</i>      | 1.298±0.343  | 1.005±0.537  | 8.11E-04 |
| cg10775273 | 2  | 219857927 | <i>CRYBA2</i>    | -5.897±0.708 | -5.31±1.064  | 8.11E-04 |
| cg15516226 | 5  | 180467519 | <i>BTNL9</i>     | 2.212±0.506  | 2.746±1.04   | 8.12E-04 |
| cg08893585 | 11 | 129245309 | <i>BARX2</i>     | -4.091±0.335 | -3.849±0.41  | 8.13E-04 |
| cg09748960 | 6  | 32374926  | <i>BTNL2</i>     | 0.187±0.311  | -0.201±0.778 | 8.13E-04 |
| cg17342283 | 10 | 70847882  | <i>SRGN</i>      | -2.893±0.339 | -2.293±1.242 | 8.15E-04 |
| cg02863947 | 3  | 119499190 | <i>NR1I2</i>     | 2.268±0.357  | 1.965±0.556  | 8.19E-04 |
| cg24693053 | 4  | 682834    | <i>MFSD7</i>     | -1.48±0.269  | -1.127±0.712 | 8.20E-04 |
| cg05657090 | 19 | 12917086  | <i>RNASEH2A</i>  | 3.12±0.332   | 2.78±0.658   | 8.20E-04 |
| cg10494773 | 14 | 35452441  | <i>SRP54</i>     | -2.948±0.413 | -3.223±0.44  | 8.24E-04 |
| cg01375871 | 16 | 1305420   | <i>TPSD1</i>     | 0.206±0.29   | -0.223±0.877 | 8.25E-04 |
| cg13696887 | 12 | 52800423  | <i>KRT82</i>     | 3.314±0.334  | 3.025±0.536  | 8.25E-04 |
| cg20383064 | 3  | 133117420 | <i>BFSP2</i>     | 2.573±0.296  | 2.295±0.529  | 8.26E-04 |
| cg13904968 | 20 | 56136012  | <i>PCK1</i>      | -0.431±0.281 | -0.856±0.871 | 8.26E-04 |
| cg20657383 | 19 | 43033362  | <i>CEACAM1</i>   | 3.352±0.255  | 2.897±0.943  | 8.26E-04 |
| cg22475430 | 12 | 7033563   | <i>ATN1</i>      | -5.063±0.528 | -4.749±0.442 | 8.26E-04 |
| cg14540297 | 1  | 87597473  | <i>LOC339524</i> | -3.953±0.407 | -4.2±0.358   | 8.28E-04 |
| cg25600236 | 4  | 71091212  | <i>FDCSP</i>     | 1.071±0.35   | 0.715±0.665  | 8.28E-04 |
| cg05982504 | 16 | 1844962   | <i>IGFALS</i>    | 1.211±0.429  | 0.774±0.847  | 8.28E-04 |
| cg19935424 | 17 | 74706305  | <i>MXRA7</i>     | -4.047±0.444 | -3.766±0.426 | 8.29E-04 |
| cg20582984 | 20 | 57417233  | <i>GNAS</i>      | 1.16±0.139   | 1.408±0.514  | 8.31E-04 |
| cg11845202 | 12 | 53242392  | <i>KRT78</i>     | 2.784±0.193  | 2.64±0.248   | 8.34E-04 |
| cg22851319 | 20 | 39765363  | <i>PLCG1</i>     | -3.659±0.282 | -3.386±0.523 | 8.35E-04 |
| cg12368241 | 6  | 64355267  | <i>PHF3</i>      | 1.831±0.22   | 1.446±0.799  | 8.35E-04 |
| cg21712685 | 6  | 35744605  | <i>CLPSL2</i>    | -4.383±0.324 | -4.578±0.28  | 8.37E-04 |
| cg01580044 | 1  | 114300656 | <i>PHTF1</i>     | -1.666±0.552 | -1.267±0.68  | 8.39E-04 |
| cg26033710 | 2  | 75426249  | <i>TACR1</i>     | -0.783±0.305 | -0.443±0.671 | 8.39E-04 |
| cg10821722 | 11 | 64571899  | <i>MAP4K2</i>    | 3.642±0.314  | 3.349±0.557  | 8.40E-04 |
| cg22836470 | 12 | 108991777 | <i>TMEM119</i>   | -0.093±0.151 | 0.099±0.387  | 8.43E-04 |
| cg16478145 | 2  | 188419830 | <i>TFPI</i>      | 0.372±0.288  | 0.69±0.629   | 8.44E-04 |
| cg18034859 | 20 | 30406688  | <i>MYLK2</i>     | 3.378±0.183  | 3.179±0.392  | 8.48E-04 |
| cg03349935 | 15 | 65361335  | <i>RASL12</i>    | 1.893±0.226  | 2.107±0.409  | 8.50E-04 |
| cg11761535 | 3  | 149051031 | <i>TM4SF18</i>   | 0.605±0.24   | 1.045±0.915  | 8.52E-04 |
| cg16101800 | 20 | 56136569  | <i>PCK1</i>      | 1.58±0.296   | 1.109±0.971  | 8.53E-04 |
| cg07084709 | 15 | 57883511  | <i>MYZAP</i>     | 3.404±0.402  | 2.848±1.133  | 8.53E-04 |
| cg12619509 | 16 | 2286601   | <i>DNASE1L2</i>  | -0.491±0.301 | -0.101±0.789 | 8.53E-04 |
| cg25822709 | 9  | 19048850  | <i>RRAGA</i>     | -2.929±0.502 | -3.25±0.494  | 8.55E-04 |
| cg07935568 | 13 | 49794126  | <i>MLNR</i>      | -2.608±0.321 | -2.135±0.97  | 8.59E-04 |
| cg15473868 | 16 | 56716621  | <i>MT1X</i>      | -4.531±0.5   | -4.866±0.541 | 8.61E-04 |
| cg01868782 | 6  | 126071099 | <i>HEY2</i>      | -3.879±0.354 | -3.358±1.07  | 8.61E-04 |
| cg06311778 | 12 | 53441582  | <i>TENC1</i>     | -4.773±0.667 | -4.358±0.624 | 8.61E-04 |
| cg17001430 | 6  | 168418276 | <i>KIF25</i>     | 0.556±0.211  | 0.206±0.725  | 8.63E-04 |
| cg03712843 | 13 | 39565534  | <i>STOML3</i>    | 2.309±0.157  | 2.182±0.229  | 8.63E-04 |
| cg10601168 | 6  | 154831192 | <i>CNKSR3</i>    | -4.727±0.454 | -4.396±0.567 | 8.63E-04 |
| cg25619607 | 18 | 22006735  | <i>IMPACT</i>    | -5.34±0.376  | -5.044±0.531 | 8.64E-04 |
| cg12788313 | 3  | 49726177  | <i>MST1</i>      | 1.407±0.431  | 1.739±0.586  | 8.65E-04 |
| cg22794078 | 15 | 65904012  | <i>VWA9</i>      | -3.982±0.552 | -3.608±0.609 | 8.69E-04 |
| cg23297477 | 16 | 66638293  | <i>CMTM3</i>     | -4.497±0.632 | -3.354±2.383 | 8.70E-04 |
| cg27365426 | 2  | 143886372 | <i>ARHGAP15</i>  | -0.251±0.363 | -0.607±0.685 | 8.72E-04 |
| cg22854223 | 11 | 44586505  | <i>CD82</i>      | -3.22±0.477  | -2.804±0.776 | 8.72E-04 |
| cg15087147 | 7  | 127672169 | <i>LRRC4</i>     | -5.312±0.436 | -4.668±1.322 | 8.72E-04 |
| cg21602160 | 17 | 41003272  | <i>AOC3</i>      | -0.482±0.412 | -0.833±0.651 | 8.72E-04 |
| cg01735903 | 8  | 22102669  | <i>POLR3D</i>    | -3.234±0.403 | -2.981±0.386 | 8.75E-04 |
| cg05989429 | 19 | 1041026   | <i>ABCA7</i>     | -5.394±0.433 | -5.662±0.4   | 8.78E-04 |
| cg22721827 | 16 | 2520958   | <i>NTN3</i>      | -0.963±0.233 | -0.632±0.68  | 8.78E-04 |
| cg17475918 | 6  | 30457237  | <i>HLA-E</i>     | -3.222±0.768 | -2.518±1.335 | 8.80E-04 |
| cg11152574 | 10 | 114134550 | <i>ACSL5</i>     | 1.819±0.369  | 1.48±0.637   | 8.82E-04 |
| cg22734085 | 4  | 184020261 | <i>WWC2-AS2</i>  | -5.894±0.818 | -5.304±1.009 | 8.85E-04 |
| cg21621204 | 4  | 70916719  | <i>HTN1</i>      | 1.965±0.213  | 1.705±0.518  | 8.87E-04 |
| cg24611092 | 2  | 172778432 | <i>HAT1</i>      | 2.46±0.4     | 2.122±0.624  | 8.89E-04 |
| cg14719352 | 19 | 49258131  | <i>FUT1</i>      | 1.103±0.198  | 0.893±0.413  | 8.93E-04 |
| cg10995925 | 6  | 31539601  | <i>LTA</i>       | 0.483±0.333  | 0.127±0.702  | 8.95E-04 |
| cg01560871 | 10 | 72545424  | <i>TBATA</i>     | 2.555±0.301  | 2.244±0.61   | 8.96E-04 |
| cg19136717 | 15 | 72766740  | <i>ARIH1</i>     | -3.679±0.388 | -3.437±0.366 | 9.02E-04 |
| cg26333317 | 12 | 51319063  | <i>METTL7A</i>   | -3.234±0.432 | -2.961±0.42  | 9.07E-04 |
| cg22780475 | 19 | 45281526  | <i>CBLC</i>      | 0.992±0.251  | 0.635±0.732  | 9.07E-04 |
| cg14904464 | 12 | 45269790  | <i>NELL2</i>     | -4.805±0.385 | -4.371±0.867 | 9.13E-04 |
| cg06189133 | 19 | 17931995  | <i>INSL3</i>     | 1.815±0.5    | 2.214±0.724  | 9.16E-04 |
| cg17298704 | 3  | 137717607 | <i>CLDN18</i>    | 3.293±0.357  | 2.81±0.988   | 9.16E-04 |
| cg09980522 | 11 | 105481802 | <i>GRIA4</i>     | -0.927±0.556 | -0.476±0.824 | 9.17E-04 |

|            |    |           |             |              |              |          |
|------------|----|-----------|-------------|--------------|--------------|----------|
| cg14141399 | 19 | 52228048  | HAS1        | 0.43±0.388   | 0.922±0.999  | 9.17E-04 |
| cg02540157 | 7  | 99816814  | PVRIG       | 1.613±0.185  | 1.42±0.381   | 9.19E-04 |
| cg13744194 | 5  | 68788087  | OCLN        | -2.461±0.366 | -2.202±0.439 | 9.19E-04 |
| cg25416014 | 3  | 183146809 | MCF2L2      | -4.052±0.464 | -4.385±0.571 | 9.20E-04 |
| cg27247832 | 16 | 22018748  | C16orf52    | -3.356±0.418 | -2.86±0.998  | 9.21E-04 |
| cg12819826 | 19 | 10216676  | PPAN-P2RY11 | 0.856±0.339  | 0.479±0.751  | 9.23E-04 |
| cg12435758 | 4  | 25032141  | LG12        | -5.287±0.513 | -4.962±0.501 | 9.24E-04 |
| cg09530763 | 11 | 119204876 | RNF26       | -3.866±0.342 | -3.567±0.561 | 9.24E-04 |
| cg01429391 | 14 | 23904930  | MYH7        | 0.168±0.279  | 0.62±0.94    | 9.26E-04 |
| cg11134443 | 2  | 143635318 | KYNU        | 0.907±0.252  | 0.596±0.63   | 9.26E-04 |
| cg14353201 | 11 | 67448395  | ALDH3B2     | 0.511±0.29   | 0.748±0.431  | 9.30E-04 |
| cg26675382 | 6  | 150067846 | NUP43       | -2.473±0.353 | -2.754±0.506 | 9.31E-04 |
| cg06335889 | 20 | 32077519  | CBFA2T2     | -4.451±0.372 | -4.693±0.385 | 9.32E-04 |
| cg02002676 | 22 | 39378440  | APOBEC3B    | -3.835±0.588 | -4.423±1.149 | 9.38E-04 |
| cg03614513 | 1  | 115632038 | TSPAN2      | -4.015±0.335 | -3.604±0.831 | 9.40E-04 |
| cg11115702 | 16 | 28986698  | SPNS1       | -3.51±0.34   | -3.187±0.622 | 9.41E-04 |
| cg13449372 | 10 | 102748693 | C10orf2     | 3.24±0.3     | 3.44±0.325   | 9.42E-04 |
| cg25608949 | 21 | 43816355  | TMPRSS3     | 0.29±0.189   | -0.023±0.652 | 9.42E-04 |
| cg21488617 | 1  | 38022586  | DNAL1       | -1.361±0.34  | -1.027±0.651 | 9.44E-04 |
| cg12004206 | 9  | 138987102 | NACC2       | -3.962±0.523 | -3.547±0.753 | 9.47E-04 |
| cg12973651 | 19 | 42894453  | CNFN        | -2.397±0.436 | -1.992±0.777 | 9.50E-04 |
| cg03851112 | 11 | 66278358  | BBS1        | -4.059±0.364 | -3.786±0.483 | 9.50E-04 |
| cg19478478 | 6  | 123957927 | TRDN        | 1.158±0.355  | 0.765±0.784  | 9.50E-04 |
| cg18801691 | 18 | 49866335  | DCC         | -3.021±0.491 | -2.588±0.819 | 9.51E-04 |
| cg09495351 | 17 | 38375257  | WIPF2       | -3.1±0.566   | -3.488±0.648 | 9.52E-04 |
| cg01275830 | 10 | 104211749 | C10orf95    | 3.058±0.248  | 3.259±0.368  | 9.56E-04 |
| cg07890954 | 15 | 72102874  | NR2E3       | 3.73±0.226   | 3.533±0.37   | 9.58E-04 |
| cg25225073 | 14 | 90528983  | KCNK13      | -4.734±0.435 | -4.175±1.141 | 9.63E-04 |
| cg23968383 | 8  | 125984927 | ZNF572      | 1.92±0.329   | 1.356±1.181  | 9.65E-04 |
| cg23320056 | 1  | 155948742 | ARHGEF2     | -3.499±0.271 | -3.302±0.343 | 9.65E-04 |
| cg01599709 | 5  | 139725677 | HBEGF       | -2.159±0.476 | -1.763±0.735 | 9.65E-04 |
| cg04631202 | 1  | 25942460  | MAN1C1      | -2.85±0.421  | -2.521±0.595 | 9.67E-04 |
| cg20728496 | 11 | 71163555  | NADSYN1     | -3.292±0.614 | -3.684±0.615 | 9.68E-04 |
| cg04290964 | 13 | 77564689  | CLN5        | 2.589±0.158  | 2.474±0.201  | 9.70E-04 |
| cg07758904 | 9  | 115652824 | SLC46A2     | -3.755±0.835 | -2.911±1.658 | 9.78E-04 |
| cg19382175 | 5  | 149324712 | PDE6A       | 1.808±0.139  | 1.669±0.273  | 9.78E-04 |
| cg13506226 | 13 | 48990685  | LPAR6       | 1.557±0.271  | 1.319±0.452  | 9.78E-04 |
| cg26747293 | 5  | 38258670  | EGFLAM      | -4.417±0.615 | -3.795±1.223 | 9.78E-04 |
| cg11277230 | 4  | 87813935  | C4orf36     | -3.156±0.438 | -2.837±0.555 | 9.80E-04 |
| cg02204046 | 2  | 16080760  | MYCN        | -4.202±0.394 | -3.859±0.647 | 9.83E-04 |
| cg11993754 | 17 | 37856513  | ERBB2       | -2.376±0.565 | -1.945±0.773 | 9.84E-04 |
| cg19428417 | 16 | 66959729  | RRAD        | -1.383±0.293 | -1.046±0.679 | 9.87E-04 |
| cg14662172 | 13 | 46679081  | CPB2        | 1.587±0.357  | 1.254±0.637  | 9.91E-04 |
| cg07594933 | 12 | 515355    | CCDC77      | 2.391±0.192  | 2.217±0.333  | 9.98E-04 |
| cg24474182 | 3  | 151047307 | P2RY13      | 1.355±0.312  | 1.578±0.379  | 9.99E-04 |
| cg06132342 | 12 | 52761153  | KRT85       | 1.201±0.246  | 1.418±0.411  | 1.00E-03 |
| cg17430393 | 2  | 17722068  | VSNL1       | -5.455±0.51  | -4.938±1.02  | 1.01E-03 |
| cg18399183 | 12 | 51318138  | METTL7A     | -2.792±0.373 | -2.494±0.545 | 1.01E-03 |
| cg27208307 | 10 | 70847399  | SRGN        | -2.639±0.414 | -2.036±1.254 | 1.01E-03 |
| cg25250358 | 3  | 145879084 | PLOD2       | -2.197±0.659 | -1.697±0.894 | 1.01E-03 |
| cg05338167 | 15 | 68498251  | CALML4      | 1.465±0.226  | 1.086±0.798  | 1.02E-03 |
| cg13833831 | 19 | 3802558   | MATK        | 2.069±0.279  | 1.731±0.69   | 1.02E-03 |
| cg07036530 | 10 | 125425262 | GPR26       | -1.159±0.443 | -0.718±0.867 | 1.02E-03 |
| cg00315936 | 7  | 127292739 | SND1        | -3.199±0.382 | -3.457±0.43  | 1.03E-03 |
| cg03402876 | 2  | 11051991  | KCNF1       | -6.003±0.674 | -5.5±0.895   | 1.03E-03 |
| cg11203041 | 12 | 16500185  | MGST1       | 0.248±0.248  | -0.106±0.736 | 1.03E-03 |
| cg09773756 | 10 | 99259519  | UBTD1       | -4.623±0.472 | -4.289±0.576 | 1.03E-03 |
| cg27413508 | 20 | 30225517  | COX4I2      | -0.178±0.287 | 0.121±0.595  | 1.03E-03 |
| cg27567335 | 2  | 238768074 | RAMP1       | -2.686±0.252 | -2.871±0.327 | 1.03E-03 |
| cg26704579 | 15 | 75018690  | CYP11A1     | -2.359±0.357 | -2.129±0.368 | 1.03E-03 |
| cg24355091 | 3  | 183603136 | PARL        | -2.977±0.465 | -2.617±0.655 | 1.04E-03 |
| cg16698623 | 10 | 131412968 | MGMT        | 2.679±0.351  | 2.375±0.576  | 1.04E-03 |
| cg15339605 | 7  | 115670795 | TFEC        | -2.761±0.451 | -3.107±0.627 | 1.04E-03 |
| cg15746187 | 1  | 11713123  | FBXO44      | 1.307±0.251  | 0.931±0.786  | 1.04E-03 |
| cg08403419 | 1  | 155911238 | RXFP4       | -0.639±0.267 | -0.994±0.732 | 1.05E-03 |
| cg20591405 | 3  | 133614578 | RAB6B       | -5.906±0.781 | -5.352±0.961 | 1.05E-03 |
| cg19342782 | 1  | 70821806  | HHLA3       | -2.014±0.41  | -1.672±0.641 | 1.05E-03 |
| cg07426848 | 1  | 153521712 | S100A3      | 1.021±0.375  | 0.693±0.624  | 1.05E-03 |
| cg16998872 | 4  | 144826832 | GYPE        | 2.124±0.162  | 1.855±0.566  | 1.05E-03 |
| cg18598959 | 1  | 151298666 | PI4KB       | 0.649±0.264  | 1.013±0.755  | 1.05E-03 |

|            |    |           |                  |              |              |          |
|------------|----|-----------|------------------|--------------|--------------|----------|
| cg10124201 | 2  | 198650752 | <i>BOLL</i>      | -0.286±0.178 | -0.049±0.491 | 1.06E-03 |
| cg09787254 | 16 | 74808678  | <i>FA2H</i>      | -4.925±0.433 | -5.204±0.449 | 1.06E-03 |
| cg22325715 | 17 | 40951156  | <i>CNTD1</i>     | 3.902±0.427  | 3.565±0.618  | 1.06E-03 |
| cg07894717 | 1  | 10508598  | <i>CORT</i>      | 3.658±0.385  | 3.382±0.481  | 1.06E-03 |
| cg20613889 | 2  | 49381495  | <i>FSHR</i>      | -0.425±0.344 | -0.065±0.719 | 1.07E-03 |
| cg20066677 | 12 | 133424420 | <i>CHFR</i>      | 2.41±0.23    | 2.679±0.547  | 1.07E-03 |
| cg25802424 | 13 | 110438937 | <i>IRS2</i>      | -3.828±1.102 | -3.091±1.228 | 1.07E-03 |
| cg19393006 | 9  | 135820767 | <i>TSC1</i>      | -0.221±0.229 | -0.468±0.495 | 1.08E-03 |
| cg23185262 | 21 | 45137544  | <i>PDXK</i>      | 1.404±0.246  | 1.765±0.756  | 1.08E-03 |
| cg05874450 | 6  | 105627246 | <i>POPDC3</i>    | -3.939±0.32  | -3.555±0.785 | 1.08E-03 |
| cg19516009 | 8  | 22018080  | <i>SFTPC</i>     | 1.488±0.267  | 1.741±0.497  | 1.09E-03 |
| cg09226684 | 19 | 51520093  | <i>KLK10</i>     | -2.242±0.315 | -1.864±0.774 | 1.09E-03 |
| cg09261262 | 10 | 88414554  | <i>OPN4</i>      | 2.092±0.433  | 1.715±0.722  | 1.09E-03 |
| cg02293044 | 22 | 29703543  | <i>GAS2L1</i>    | -1.811±0.438 | -1.414±0.768 | 1.09E-03 |
| cg14043602 | 17 | 3301340   | <i>OR1E1</i>     | -1.372±0.22  | -1.629±0.524 | 1.09E-03 |
| cg04200192 | 3  | 183749414 | <i>HTR3D</i>     | 1.795±0.231  | 1.978±0.339  | 1.09E-03 |
| cg02085507 | 19 | 6739192   | <i>TRIP10</i>    | -0.866±0.389 | -0.4±0.955   | 1.09E-03 |
| cg25040282 | 4  | 70893962  | <i>HTN3</i>      | 1.614±0.259  | 1.341±0.544  | 1.10E-03 |
| cg25683904 | 10 | 51622198  | <i>TMM23</i>     | -0.701±0.436 | -0.986±0.462 | 1.10E-03 |
| cg21516478 | 5  | 150400328 | <i>GPX3</i>      | -3.414±0.32  | -3.173±0.435 | 1.10E-03 |
| cg03962522 | 22 | 32439254  | <i>SLC5A1</i>    | -0.122±0.45  | -0.47±0.634  | 1.11E-03 |
| cg16276199 | 2  | 28974102  | <i>PPP1CB</i>    | -5.056±0.41  | -5.328±0.452 | 1.11E-03 |
| cg06440646 | 4  | 146403418 | <i>SMAD1</i>     | -5.309±0.542 | -4.944±0.615 | 1.11E-03 |
| cg07293947 | 5  | 174905244 | <i>SFXN1</i>     | -4.036±0.414 | -3.665±0.717 | 1.11E-03 |
| cg12832565 | 1  | 145715672 | <i>CD160</i>     | 1.329±0.387  | 0.929±0.799  | 1.12E-03 |
| cg16301617 | 17 | 76128906  | <i>TMC6</i>      | 0.409±0.26   | 0.104±0.624  | 1.12E-03 |
| cg07099407 | 6  | 43027930  | <i>KLC4</i>      | -2.869±0.438 | -3.21±0.624  | 1.12E-03 |
| cg17703324 | 1  | 203462465 | <i>OPTC</i>      | 2.944±0.284  | 2.574±0.768  | 1.12E-03 |
| cg00059225 | 5  | 151304357 | <i>GLRA1</i>     | -0.723±0.26  | -0.385±0.702 | 1.13E-03 |
| cg09381003 | 19 | 41082314  | <i>SHKBP1</i>    | -2.456±0.27  | -1.953±1.075 | 1.13E-03 |
| cg08695830 | 7  | 73703459  | <i>CLIP2</i>     | -3.854±0.398 | -4.15±0.53   | 1.13E-03 |
| cg08145625 | 4  | 118006405 | <i>TRAM1L1</i>   | -3.725±0.426 | -3.404±0.581 | 1.13E-03 |
| cg00400028 | 3  | 140949916 | <i>ACPL2</i>     | -2.233±0.414 | -2.6±0.708   | 1.13E-03 |
| cg19700658 | 11 | 73719872  | <i>UCP3</i>      | 1.549±0.172  | 1.331±0.45   | 1.14E-03 |
| cg05095674 | 5  | 70363677  | <i>GTF2H2</i>    | -4.705±0.465 | -4.977±0.397 | 1.14E-03 |
| cg06832039 | 7  | 153111226 | <i>0</i>         | 2.952±0.352  | 2.702±0.438  | 1.14E-03 |
| cg20089715 | 17 | 37354769  | <i>CACNB1</i>    | 2.208±0.236  | 1.982±0.446  | 1.14E-03 |
| cg18008766 | 2  | 38978896  | <i>SRSF7</i>     | -3.077±0.394 | -2.576±1.038 | 1.14E-03 |
| cg08290628 | 15 | 68936551  | <i>CORO2B</i>    | 1.016±0.273  | 0.698±0.652  | 1.14E-03 |
| cg02117021 | 6  | 29425960  | <i>OR2H1</i>     | 3.046±0.185  | 2.813±0.482  | 1.15E-03 |
| cg06894812 | 5  | 112630225 | <i>MCC</i>       | -4.785±0.3   | -4.478±0.615 | 1.15E-03 |
| cg20657421 | 17 | 34430518  | <i>CCL4</i>      | 1.629±0.747  | 1.076±0.993  | 1.15E-03 |
| cg17162271 | 19 | 14640371  | <i>TECR</i>      | -4.821±0.551 | -4.481±0.532 | 1.15E-03 |
| cg22708914 | 8  | 19170890  | <i>SH2D4A</i>    | -3.378±0.466 | -3.085±0.464 | 1.16E-03 |
| cg02672220 | 21 | 38070588  | <i>SIM2</i>      | -2.575±0.272 | -2.174±0.847 | 1.16E-03 |
| cg24200059 | 17 | 80375975  | <i>HEXDC</i>     | -3.026±0.388 | -3.259±0.35  | 1.16E-03 |
| cg08908355 | 1  | 149857186 | <i>HIST2H2BE</i> | -2.706±0.355 | -2.946±0.406 | 1.16E-03 |
| cg02111587 | 2  | 75426512  | <i>TACR1</i>     | -3.653±0.331 | -3.219±0.903 | 1.17E-03 |
| cg27140220 | 8  | 79428434  | <i>PKIA</i>      | -4.561±0.337 | -4.132±0.893 | 1.17E-03 |
| cg11386709 | 6  | 131278559 | <i>EPB41L2</i>   | 2.693±0.367  | 2.376±0.609  | 1.17E-03 |
| cg26073060 | 1  | 32686736  | <i>TMEM234</i>   | 2.396±0.347  | 2.054±0.68   | 1.17E-03 |
| cg18282543 | 16 | 1384682   | <i>BAIAP3</i>    | -3.974±0.489 | -3.506±0.924 | 1.17E-03 |
| cg06379754 | 7  | 82073573  | <i>CACNA2D1</i>  | -3.16±0.425  | -2.694±0.948 | 1.17E-03 |
| cg02382666 | 7  | 134463454 | <i>CALD1</i>     | 1.855±0.314  | 1.388±0.986  | 1.17E-03 |
| cg23166362 | 1  | 9711965   | <i>PIK3CD</i>    | -5.325±0.565 | -4.674±1.334 | 1.17E-03 |
| cg00187380 | 12 | 54427384  | <i>MIR615</i>    | -2.764±0.286 | -2.204±1.204 | 1.17E-03 |
| cg25443975 | 19 | 55794597  | <i>BRSK1</i>     | 2.65±0.301   | 2.357±0.58   | 1.17E-03 |
| cg15776355 | 12 | 7245890   | <i>C1R</i>       | -2.244±0.254 | -2.507±0.53  | 1.18E-03 |
| cg26534508 | 1  | 236306311 | <i>GPR137B</i>   | -4.96±0.55   | -4.455±0.989 | 1.18E-03 |
| cg12356261 | 1  | 156647259 | <i>NES</i>       | -4.164±0.29  | -3.973±0.318 | 1.18E-03 |
| cg03532879 | 20 | 37209395  | <i>ADIG</i>      | 2.244±0.219  | 2.443±0.387  | 1.18E-03 |
| cg20845050 | 8  | 146053666 | <i>ZNF7</i>      | -1.107±0.392 | -1.522±0.839 | 1.18E-03 |
| cg05847038 | 8  | 24298771  | <i>ADAM7</i>     | 0.646±0.305  | 0.346±0.59   | 1.18E-03 |
| cg08108311 | 17 | 40932746  | <i>WNK4</i>      | -4.461±0.701 | -3.651±1.663 | 1.18E-03 |
| cg17788013 | 5  | 147443252 | <i>SPINK5</i>    | 2.043±0.358  | 1.685±0.716  | 1.19E-03 |
| cg21663580 | 6  | 43044771  | <i>PTK7</i>      | -4.552±0.517 | -4.208±0.579 | 1.19E-03 |
| cg20879959 | 6  | 29910208  | <i>HLA-A</i>     | -3.794±0.75  | -3.217±1.06  | 1.20E-03 |
| cg07242414 | 8  | 22021845  | <i>BMP1</i>      | -3.918±0.39  | -3.629±0.523 | 1.20E-03 |
| cg01936124 | 5  | 137878512 | <i>ETF1</i>      | -5.456±0.482 | -5.166±0.446 | 1.20E-03 |
| cg27181079 | 12 | 10766103  | <i>MAGOHB</i>    | -4.009±0.455 | -3.726±0.448 | 1.20E-03 |

|            |    |           |           |              |              |          |
|------------|----|-----------|-----------|--------------|--------------|----------|
| cg21279955 | 1  | 153747551 | SLC27A3   | -2.597±0.504 | -2.25±0.599  | 1.20E-03 |
| cg11903057 | 4  | 40198776  | RHOH      | -0.554±0.298 | -0.172±0.798 | 1.20E-03 |
| cg22572159 | 1  | 115880646 | NGF       | -4.139±0.494 | -3.718±0.806 | 1.21E-03 |
| cg09374949 | 19 | 18548964  | ISYNA1    | -3.239±0.306 | -2.933±0.611 | 1.21E-03 |
| cg25310567 | 7  | 151653890 | GALNTL5   | -0.063±0.239 | -0.41±0.732  | 1.22E-03 |
| cg25870420 | 3  | 37493949  | ITGA9     | -5.432±0.684 | -4.913±0.949 | 1.22E-03 |
| cg17001035 | 10 | 92980059  | PCGF5     | -3.137±0.481 | -2.824±0.52  | 1.22E-03 |
| cg22954265 | 20 | 29520583  | 0         | 2.1±0.314    | 1.827±0.528  | 1.22E-03 |
| cg25136926 | 12 | 9602219   | DDX12P    | 1.317±0.316  | 1.111±0.343  | 1.22E-03 |
| cg19573166 | 14 | 23822408  | SLC22A17  | -2.053±0.361 | -1.722±0.649 | 1.23E-03 |
| cg04398282 | 4  | 68424256  | STAP1     | 1.53±0.357   | 1.249±0.524  | 1.23E-03 |
| cg19447966 | 11 | 12785773  | TEAD1     | 2.029±0.256  | 1.819±0.398  | 1.23E-03 |
| cg15373285 | 14 | 101293090 | MEG3      | 0.606±0.118  | 0.768±0.34   | 1.23E-03 |
| cg03382797 | 9  | 135755363 | C9orf9    | 0.89±0.356   | 0.63±0.469   | 1.23E-03 |
| cg27226949 | 13 | 107187177 | EFNB2     | -4.769±0.471 | -4.406±0.672 | 1.23E-03 |
| cg17108383 | 5  | 140867724 | PCDHGC5   | 3.222±0.295  | 2.821±0.842  | 1.24E-03 |
| cg25537724 | 2  | 39663782  | MAP4K3    | -4.78±0.4    | -4.496±0.502 | 1.24E-03 |
| cg16749930 | 11 | 71709978  | IL18BP    | -1.198±0.283 | -0.778±0.891 | 1.24E-03 |
| cg01425670 | 1  | 72749015  | NEGR1     | -5.403±0.379 | -4.962±0.911 | 1.24E-03 |
| cg00128560 | 16 | 3352013   | TIGD7     | 2.321±0.445  | 2.613±0.489  | 1.24E-03 |
| cg23696834 | 6  | 42928345  | GNMT      | -4.306±0.61  | -3.886±0.73  | 1.24E-03 |
| cg05473175 | 19 | 44143644  | CADM4     | -4.14±0.333  | -3.884±0.474 | 1.24E-03 |
| cg09892203 | 17 | 64961140  | CACNG4    | -6.013±0.747 | -5.439±1.062 | 1.25E-03 |
| cg09737668 | 1  | 159923525 | SLAMF9    | 1.926±0.258  | 2.133±0.389  | 1.25E-03 |
| cg14550518 | 3  | 21792938  | ZNF385D   | -4.274±0.494 | -3.854±0.81  | 1.25E-03 |
| cg00676660 | 3  | 64672609  | ADAMTS9   | -5.144±0.622 | -4.754±0.631 | 1.26E-03 |
| cg16616769 | 16 | 19727142  | IQCK      | 2.357±0.34   | 1.968±0.802  | 1.27E-03 |
| cg09305478 | 16 | 691988    | FAM195A   | -1.554±0.191 | -1.421±0.235 | 1.27E-03 |
| cg13877895 | 2  | 69201009  | GKN1      | 2.628±0.285  | 2.391±0.452  | 1.27E-03 |
| cg12089698 | 8  | 145086882 | SPATC1    | 0.335±0.204  | 0.583±0.516  | 1.28E-03 |
| cg18488855 | 14 | 27066634  | NOVA1     | -4.059±0.381 | -3.648±0.842 | 1.28E-03 |
| cg03621001 | 19 | 16221719  | RAB8A     | 1.45±0.434   | 1.854±0.801  | 1.28E-03 |
| cg04755031 | 22 | 44287841  | PNPLA5    | -3.519±0.418 | -3.214±0.552 | 1.28E-03 |
| cg20727114 | 19 | 50194120  | CPT1C     | -3.651±0.46  | -3.286±0.684 | 1.28E-03 |
| cg02921257 | 3  | 39233858  | XIRP1     | 1.467±0.247  | 1.22±0.499   | 1.28E-03 |
| cg02515422 | 9  | 120466493 | TLR4      | -3.86±0.417  | -4.206±0.662 | 1.28E-03 |
| cg04386405 | 19 | 53141394  | ZNF83     | -4.747±0.411 | -4.317±0.876 | 1.29E-03 |
| cg02886284 | 4  | 166300290 | CPE       | -5.333±0.636 | -4.77±1.101  | 1.29E-03 |
| cg18133957 | 19 | 1450493   | APC2      | 0.303±0.426  | 0.733±0.87   | 1.29E-03 |
| cg22821324 | 4  | 176923439 | GPM6A     | -3.671±0.407 | -3.147±1.101 | 1.30E-03 |
| cg04430204 | 2  | 219537816 | RNF25     | 1.767±0.267  | 1.981±0.403  | 1.30E-03 |
| cg16202564 | 8  | 98881927  | MATN2     | -2.3±0.271   | -2.05±0.494  | 1.30E-03 |
| cg13571802 | 3  | 44916473  | TGM4      | 2.249±0.344  | 1.916±0.665  | 1.30E-03 |
| cg10073723 | 7  | 33944213  | BMPER     | -5.608±0.451 | -5.149±0.929 | 1.30E-03 |
| cg15538427 | 11 | 62457014  | LRRN4CL   | -0.988±0.248 | -1.233±0.493 | 1.30E-03 |
| cg23283875 | 7  | 89874597  | C7orf63   | -5.478±0.515 | -5.102±0.681 | 1.31E-03 |
| cg02413850 | 20 | 44993235  | SLC35C2   | -5.349±0.388 | -4.732±1.324 | 1.31E-03 |
| cg06866657 | 9  | 124990754 | LHX6      | -3.766±0.294 | -3.391±0.788 | 1.31E-03 |
| cg03819692 | 16 | 89225639  | LINC00304 | -0.034±0.38  | 0.411±0.925  | 1.32E-03 |
| cg01127428 | 12 | 102133040 | SYCP3     | 3.915±0.26   | 3.74±0.301   | 1.32E-03 |
| cg23217005 | 16 | 56691744  | MT1F      | -3.971±0.432 | -4.255±0.482 | 1.33E-03 |
| cg13359415 | 4  | 25032564  | LG12      | -4.393±1.134 | -3.671±1.192 | 1.33E-03 |
| cg00648883 | 13 | 32524761  | EEF1DP3   | -0.593±0.319 | -0.889±0.589 | 1.33E-03 |
| cg11038081 | 19 | 44810637  | ZNF235    | 0.584±0.201  | 0.309±0.583  | 1.33E-03 |
| cg10784090 | 3  | 137717598 | CLDN18    | 2.724±0.297  | 2.379±0.719  | 1.34E-03 |
| cg10064162 | 7  | 107644249 | LAMB1     | -2.293±0.309 | -1.928±0.761 | 1.34E-03 |
| cg10624445 | 16 | 58006124  | CNGB1     | 1.192±0.284  | 0.934±0.513  | 1.34E-03 |
| cg04039397 | 3  | 111260783 | CD96      | -1.812±0.391 | -1.368±0.913 | 1.34E-03 |
| cg03940103 | 19 | 41698823  | CYP2S1    | -3.742±0.347 | -3.493±0.449 | 1.35E-03 |
| cg15957394 | 4  | 7941823   | AFAP1     | -3.338±0.486 | -2.983±0.645 | 1.35E-03 |
| cg15966757 | 12 | 372259    | SLC6A13   | 0.972±0.331  | 0.617±0.73   | 1.35E-03 |
| cg01437411 | 12 | 7033911   | ATN1      | -2.168±0.341 | -2.473±0.602 | 1.36E-03 |
| cg22150335 | 10 | 62148959  | ANK3      | 2.392±0.173  | 2.247±0.28   | 1.36E-03 |
| cg17095797 | 16 | 86612013  | FOXL1     | -0.932±0.332 | -0.613±0.641 | 1.36E-03 |
| cg13081704 | 11 | 2890457   | KCNQ1DN   | 1.451±0.457  | 1.819±0.699  | 1.37E-03 |
| cg11102782 | 19 | 18549136  | ISYNA1    | -2.948±0.505 | -2.492±0.9   | 1.37E-03 |
| cg09699159 | 11 | 45115528  | PRDM11    | 2.337±0.303  | 2.101±0.444  | 1.37E-03 |
| cg14444244 | 2  | 172270326 | METTL8    | 2.004±0.238  | 2.155±0.249  | 1.37E-03 |
| cg05252264 | 19 | 55385587  | FCAR      | -0.131±0.323 | -0.509±0.787 | 1.38E-03 |
| cg16462075 | 7  | 100544220 | 0         | 1.431±0.366  | 1.74±0.599   | 1.38E-03 |

|            |    |           |               |              |              |          |
|------------|----|-----------|---------------|--------------|--------------|----------|
| cg19423311 | 16 | 27413904  | IL21R         | -1.507±0.463 | -1.072±0.87  | 1.38E-03 |
| cg26681123 | 9  | 140125311 | SLC34A3       | 1.907±0.167  | 1.649±0.553  | 1.38E-03 |
| cg04809136 | 2  | 24300158  | SF3B14        | -4.534±0.54  | -4.841±0.446 | 1.38E-03 |
| cg07013734 | 11 | 101454683 | TRPC6         | -4.21±0.492  | -3.805±0.777 | 1.38E-03 |
| cg24034289 | 1  | 155232344 | SCAMP3        | -3.179±0.675 | -3.584±0.629 | 1.39E-03 |
| cg16747567 | 14 | 71373858  | PCNX          | -4.177±0.471 | -4.474±0.489 | 1.39E-03 |
| cg19953406 | 19 | 51487360  | KLK7          | -3.45±0.503  | -3.088±0.656 | 1.40E-03 |
| cg03622431 | 1  | 84864880  | DNASE2B       | 2.732±0.261  | 2.458±0.563  | 1.40E-03 |
| cg25550573 | 4  | 121994288 | NDNF          | -4.219±0.553 | -3.766±0.872 | 1.40E-03 |
| cg07690018 | 16 | 89642492  | CPNE7         | -4.081±0.464 | -3.569±1.062 | 1.41E-03 |
| cg09276978 | 20 | 34995517  | DLGAP4        | 1.954±0.203  | 1.642±0.672  | 1.41E-03 |
| cg12600197 | 15 | 75639339  | NEIL1         | -1.32±0.208  | -1.533±0.436 | 1.41E-03 |
| cg03026462 | 14 | 38064490  | FOXA1         | -3.575±0.838 | -2.987±1.052 | 1.42E-03 |
| cg18113270 | 11 | 102713490 | MMP3          | 2.884±0.177  | 2.646±0.509  | 1.42E-03 |
| cg04283392 | 3  | 196366369 | NRROS         | -3.556±0.294 | -3.323±0.445 | 1.42E-03 |
| cg16386158 | 2  | 102927397 | IL1RL1        | 1.498±0.285  | 1.152±0.727  | 1.42E-03 |
| cg19177941 | 15 | 101420185 | ALDH1A3       | -1.513±0.425 | -1.216±0.532 | 1.42E-03 |
| cg13894021 | 22 | 23487383  | RAB36         | -3.079±0.394 | -3.364±0.519 | 1.42E-03 |
| cg19626078 | 10 | 134973796 | KNDC1         | -4.793±0.703 | -4.323±0.814 | 1.42E-03 |
| cg04483754 | 17 | 26128980  | NOS2          | 2.722±0.217  | 2.523±0.398  | 1.43E-03 |
| cg01494593 | 2  | 111556249 | ACOXL         | 1.748±0.321  | 1.957±0.353  | 1.43E-03 |
| cg11051843 | 7  | 80548695  | SEMA3C        | -3.815±0.725 | -3.253±1.061 | 1.43E-03 |
| cg18920397 | 1  | 160765805 | LY9           | 1.105±0.332  | 0.773±0.677  | 1.43E-03 |
| cg15589354 | 1  | 229760606 | TAF5L         | -1.874±0.23  | -2.101±0.46  | 1.44E-03 |
| cg01429321 | 5  | 121413797 | LOX           | -4.237±0.499 | -3.924±0.516 | 1.44E-03 |
| cg24105933 | 4  | 8270795   | HTRA3         | 3.76±0.207   | 3.609±0.277  | 1.44E-03 |
| cg15739581 | 2  | 166626783 | GALNT3        | 0.233±0.322  | 0.541±0.623  | 1.45E-03 |
| cg02554564 | 12 | 5603131   | NTF3          | 0.406±0.267  | 0.058±0.739  | 1.45E-03 |
| cg17738133 | 11 | 2907059   | CDKN1C        | -4.847±0.435 | -4.626±0.255 | 1.45E-03 |
| cg17185543 | 9  | 139760589 | EDF1          | -2.312±0.404 | -2.062±0.408 | 1.45E-03 |
| cg26411702 | 8  | 21881998  | NPM2          | -4.176±0.43  | -3.894±0.486 | 1.46E-03 |
| cg01654582 | 4  | 171011577 | AADAT         | -4.208±0.523 | -3.853±0.625 | 1.46E-03 |
| cg24392574 | 10 | 5541423   | CALML5        | 4.483±0.299  | 4.008±1.027  | 1.46E-03 |
| cg02787991 | 17 | 80291405  | SECTM1        | -4.926±0.674 | -4.392±1.02  | 1.46E-03 |
| cg02488871 | 2  | 219288203 | VIL1          | 1.56±0.181   | 1.754±0.403  | 1.47E-03 |
| cg09375488 | 7  | 95115026  | ASB4          | 0.027±0.313  | 0.339±0.637  | 1.47E-03 |
| cg10694914 | 11 | 111250431 | POU2AF1       | 0.286±0.27   | 0.65±0.78    | 1.47E-03 |
| cg20546002 | 5  | 178017376 | COL23A1       | -5.169±0.577 | -4.549±1.284 | 1.47E-03 |
| cg17100200 | 1  | 42618313  | GUCA2B        | 3.264±0.358  | 2.993±0.507  | 1.47E-03 |
| cg02010852 | 9  | 126118355 | CRB2          | -1.327±0.313 | -1.023±0.617 | 1.48E-03 |
| cg16855440 | 19 | 45842723  | KLC3          | 1.781±0.25   | 1.457±0.69   | 1.48E-03 |
| cg22699362 | 2  | 118775427 | 0             | 1.3±0.296    | 1.033±0.494  | 1.48E-03 |
| cg13689073 | 5  | 154093260 | LARP1         | 0.252±0.281  | -0.058±0.648 | 1.49E-03 |
| cg17214210 | 2  | 61633421  | USP34         | 1.098±0.322  | 1.34±0.422   | 1.49E-03 |
| cg27285720 | 1  | 89664782  | GBP4          | -0.748±0.402 | -1.205±0.957 | 1.49E-03 |
| cg22228134 | 14 | 25078609  | GZMH          | 1.838±0.217  | 1.461±0.824  | 1.49E-03 |
| cg09881855 | 8  | 49834618  | SNAI2         | -4.558±0.303 | -4.187±0.785 | 1.49E-03 |
| cg20538819 | 1  | 214724805 | PTPN14        | -4.86±0.401  | -4.568±0.54  | 1.49E-03 |
| cg05825950 | 1  | 207669576 | CR1           | -2.958±0.524 | -2.595±0.651 | 1.50E-03 |
| cg14019317 | 1  | 214161306 | PROX1         | -4.255±0.398 | -3.876±0.767 | 1.50E-03 |
| cg09572685 | 17 | 56293543  | MKS1          | 1.656±0.422  | 1.96±0.549   | 1.50E-03 |
| cg26220350 | 20 | 44540621  | PLTP          | -3.73±0.427  | -3.319±0.834 | 1.50E-03 |
| cg18087514 | 1  | 241696246 | KMO           | 0.565±0.339  | 0.139±0.898  | 1.51E-03 |
| cg15619794 | 5  | 131880649 | IL5           | 2.136±0.231  | 1.965±0.319  | 1.51E-03 |
| cg00152644 | 1  | 153068236 | SPRR2E        | 1.967±0.212  | 1.4±1.261    | 1.51E-03 |
| cg16396488 | 12 | 120766223 | PLA2G1B       | 0.373±0.229  | 0.667±0.628  | 1.51E-03 |
| cg24517042 | 3  | 8774409   | CAV3          | 2.338±0.184  | 2.111±0.483  | 1.52E-03 |
| cg01173186 | 6  | 24126221  | NRSN1         | -1.306±0.273 | -1.002±0.636 | 1.52E-03 |
| cg16992787 | 19 | 5914669   | CAPS          | 1.766±0.309  | 1.432±0.696  | 1.52E-03 |
| cg05877109 | 14 | 23775794  | BCL2L2-PABPN1 | -1.821±0.311 | -1.639±0.282 | 1.53E-03 |
| cg04432009 | 19 | 13213688  | LYL1          | -3.477±0.207 | -3.141±0.731 | 1.53E-03 |
| cg25115460 | 1  | 3607110   | TP73          | 3.594±0.699  | 4.002±0.631  | 1.53E-03 |
| cg19296958 | 13 | 48891270  | RB1           | 2.428±0.277  | 2.611±0.318  | 1.53E-03 |
| cg04992673 | 7  | 92848714  | HEPACAM2      | 2.879±0.262  | 2.495±0.831  | 1.53E-03 |
| cg05998426 | 11 | 66103925  | RIN1          | -4.712±0.523 | -4.377±0.57  | 1.53E-03 |
| cg17612991 | 19 | 6721016   | C3            | -0.064±0.264 | 0.249±0.662  | 1.53E-03 |
| cg26647453 | 4  | 100432162 | C4orf17       | -1.14±0.312  | -1.474±0.689 | 1.53E-03 |
| cg04941721 | 4  | 75230901  | EREG          | -4.095±0.442 | -3.684±0.831 | 1.54E-03 |
| cg10548978 | 10 | 72545053  | TBATA         | 1.515±0.405  | 1.165±0.692  | 1.54E-03 |
| cg19221959 | 7  | 94537347  | PPP1R9A       | -4.736±0.879 | -4.128±1.092 | 1.54E-03 |

|             |    |           |                 |              |              |          |
|-------------|----|-----------|-----------------|--------------|--------------|----------|
| cg18809289  | 10 | 45869816  | <i>ALOX5</i>    | -1.885±0.253 | -2.158±0.569 | 1.55E-03 |
| cg10645113  | 9  | 91979776  | <i>SEMA4D</i>   | 3.322±0.239  | 2.841±1.06   | 1.55E-03 |
| cg22580512  | 12 | 125002474 | <i>NCOR2</i>    | -0.662±0.467 | -0.204±0.936 | 1.55E-03 |
| cg12181621  | 6  | 27840068  | <i>HIST1H3I</i> | -4.107±0.407 | -3.423±1.496 | 1.55E-03 |
| cg08858521  | 16 | 681022    | <i>WFIKK1</i>   | -1.764±0.44  | -1.32±0.913  | 1.55E-03 |
| cg15853125  | 21 | 32932267  | <i>TIAM1</i>    | -2.849±0.292 | -3.275±0.923 | 1.56E-03 |
| cg23706422  | 10 | 89420014  | <i>PAPSS2</i>   | -4.303±0.273 | -4.125±0.308 | 1.56E-03 |
| cg11554937  | 9  | 99064321  | <i>HSD17B3</i>  | 3.548±0.222  | 3.377±0.326  | 1.57E-03 |
| cg11919694  | 16 | 30380600  | <i>TBC1D10B</i> | -3.662±0.324 | -3.248±0.884 | 1.57E-03 |
| cg20141916  | 14 | 67878973  | <i>PLEK2</i>    | -4.717±0.551 | -4.388±0.524 | 1.57E-03 |
| cg01263716  | 11 | 2951590   | <i>PHLDA2</i>   | -4.935±0.483 | -4.595±0.619 | 1.58E-03 |
| cg25634666  | 11 | 71846788  | <i>FOLR3</i>    | 1.326±0.29   | 1.557±0.447  | 1.58E-03 |
| cg04586023  | 22 | 50690380  | <i>HDAC10</i>   | -0.22±0.133  | -0.436±0.471 | 1.58E-03 |
| cg20663831  | 7  | 150383154 | <i>GIMAP2</i>   | -1.865±0.32  | -2.34±1.031  | 1.58E-03 |
| cg11521325  | 19 | 48808268  | <i>CCDC114</i>  | -0.188±0.269 | -0.477±0.605 | 1.58E-03 |
| cg15423764  | 11 | 58499533  | <i>GLYAT</i>    | 0.567±0.244  | 0.175±0.858  | 1.59E-03 |
| cg08198480  | 5  | 17216222  | <i>BASP1</i>    | -3.118±0.595 | -3.503±0.659 | 1.59E-03 |
| cg24274272  | 17 | 72278023  | <i>DNAI2</i>    | 5.429±0.341  | 5.17±0.489   | 1.59E-03 |
| cg25764570  | 6  | 32407289  | <i>HLA-DRA</i>  | 0.943±0.212  | 0.705±0.501  | 1.59E-03 |
| cg00472136  | 12 | 57410604  | <i>TAC3</i>     | 1.864±0.17   | 2.035±0.353  | 1.60E-03 |
| cg23131777  | 1  | 120438925 | <i>ADAM30</i>   | 0.763±0.332  | 1.075±0.635  | 1.60E-03 |
| cg17995823  | 11 | 57529684  | <i>CTNND1</i>   | -2.352±0.519 | -1.986±0.666 | 1.60E-03 |
| cg14590817  | 10 | 1779730   | <i>ADARB2</i>   | -4.382±0.454 | -4.053±0.608 | 1.60E-03 |
| cg11151820  | 5  | 10250162  | <i>CCT5</i>     | -4.655±0.536 | -4.955±0.44  | 1.60E-03 |
| cg22502502  | 6  | 25962567  | <i>TRIM38</i>   | -2.232±0.348 | -1.726±1.097 | 1.60E-03 |
| cg14089692  | 20 | 3662546   | <i>ADAM33</i>   | -3.651±0.441 | -3.301±0.678 | 1.60E-03 |
| cg03338064  | 5  | 61642377  | <i>KIF2A</i>    | 2.023±0.356  | 2.254±0.397  | 1.61E-03 |
| cg03870261  | 19 | 2428514   | <i>TIMM13</i>   | -0.115±0.335 | 0.362±1.034  | 1.61E-03 |
| cg17397420  | 11 | 60552236  | <i>MS4A10</i>   | 0.754±0.323  | 1.004±0.474  | 1.61E-03 |
| cg05250673  | 10 | 60027547  | <i>IPMK</i>     | -5.761±0.486 | -5.463±0.493 | 1.61E-03 |
| cg11195662  | 9  | 79520720  | <i>PRUNE2</i>   | -3.655±0.339 | -3.361±0.586 | 1.61E-03 |
| cg26864028  | 19 | 11494980  | <i>EPOR</i>     | -4.31±0.48   | -4.003±0.523 | 1.62E-03 |
| cg18972811  | 4  | 20254736  | <i>SLIT2</i>    | -2.826±0.646 | -2.348±0.897 | 1.62E-03 |
| cg15043801  | 19 | 10305911  | <i>DNMT1</i>    | -4.622±0.398 | -4.842±0.319 | 1.62E-03 |
| cg01991150  | 11 | 46407677  | <i>CHRM4</i>    | 3.093±0.216  | 2.915±0.348  | 1.62E-03 |
| cg25258291  | 13 | 98795562  | <i>FARP1</i>    | -5.264±0.656 | -4.773±0.926 | 1.62E-03 |
| cg17892556  | 19 | 12267464  | <i>ZNF625</i>   | -4.275±0.598 | -3.744±1.066 | 1.63E-03 |
| cg11504646  | 3  | 186913950 | <i>RTP1</i>     | 1.474±0.365  | 1.727±0.458  | 1.63E-03 |
| cg11462865  | 17 | 39684124  | <i>KRT19</i>    | -4.145±0.593 | -3.645±0.989 | 1.63E-03 |
| cg00344709  | 21 | 14982225  | <i>POTED</i>    | 2.174±0.427  | 1.774±0.814  | 1.63E-03 |
| cg05126264  | 9  | 21077879  | <i>IFNB1</i>    | 2.905±0.311  | 2.62±0.578   | 1.63E-03 |
| cg22172494  | 11 | 2017362   | <i>H19</i>      | 1.162±0.24   | 1.489±0.706  | 1.64E-03 |
| cg24214470  | 17 | 1665119   | <i>SERPINF1</i> | 2.089±0.256  | 2.321±0.469  | 1.64E-03 |
| cg07899016  | 5  | 140588299 | <i>PCDHB12</i>  | -0.604±0.26  | -0.313±0.613 | 1.64E-03 |
| cg00075967  | 15 | 74495354  | <i>STRA6</i>    | 1.121±0.278  | 0.692±0.938  | 1.65E-03 |
| cg25839227  | 17 | 47288502  | <i>GNGT2</i>    | -0.161±0.287 | 0.291±0.99   | 1.65E-03 |
| cg07389922  | 17 | 7154007   | <i>CTDNBP1</i>  | -4.074±0.468 | -3.783±0.488 | 1.65E-03 |
| cg14913610  | 12 | 9142341   | <i>KLRG1</i>    | 1.42±0.33    | 1.061±0.753  | 1.65E-03 |
| cg17774418  | 6  | 6622864   | <i>LY86-AS1</i> | 1.595±0.357  | 1.171±0.901  | 1.65E-03 |
| cg21111471  | 11 | 63871000  | <i>FLRT1</i>    | 0.513±0.231  | 0.085±0.946  | 1.65E-03 |
| cg03750606  | 1  | 217262978 | <i>ESRRG</i>    | -3.646±0.341 | -3.233±0.884 | 1.66E-03 |
| cg11981599  | 8  | 11566526  | <i>GATA4</i>    | -0.109±0.679 | -0.681±0.724 | 1.66E-03 |
| cg10281770  | 17 | 80606947  | <i>WDR45B</i>   | -1.147±0.566 | -0.592±0.859 | 1.66E-03 |
| cg06168324  | 2  | 161349637 | <i>RBMS1</i>    | -4.694±0.538 | -4.333±0.643 | 1.67E-03 |
| cg05592434  | 11 | 17098772  | <i>RPS13</i>    | -1.89±0.336  | -1.677±0.363 | 1.67E-03 |
| cg27044702  | 16 | 1290763   | <i>TPSAB1</i>   | 0.091±0.369  | -0.151±0.424 | 1.67E-03 |
| cg07732037  | 12 | 123707827 | <i>MPHOSPH9</i> | 1.419±0.349  | 1.048±0.779  | 1.67E-03 |
| cg13352495  | 5  | 54529851  | <i>CCNO</i>     | -4.063±0.26  | -4.251±0.349 | 1.68E-03 |
| cg16609872  | 11 | 2828364   | <i>KCNQ1</i>    | -0.958±0.367 | -0.638±0.641 | 1.68E-03 |
| cg21296602  | 11 | 93476060  | <i>C11orf54</i> | 0.951±0.279  | 1.267±0.669  | 1.68E-03 |
| cg02965078  | 11 | 60623504  | <i>PTGDR2</i>   | -2.321±0.258 | -2.047±0.576 | 1.68E-03 |
| cg11386746  | 16 | 89237370  | <i>CDH15</i>    | -1.647±0.141 | -1.782±0.279 | 1.68E-03 |
| cg22571217  | 9  | 90112519  | <i>DAPK1</i>    | -4.776±0.459 | -4.495±0.464 | 1.68E-03 |
| cg17561452  | 16 | 84224707  | <i>ADAD2</i>    | 2.645±0.351  | 2.369±0.534  | 1.69E-03 |
| cg22469141  | 19 | 14640373  | <i>TECR</i>     | -4.227±0.452 | -3.954±0.445 | 1.69E-03 |
| cg011172735 | 1  | 28586943  | <i>SESN2</i>    | -3.673±0.365 | -3.414±0.477 | 1.69E-03 |
| cg22724153  | 7  | 123565925 | <i>SPAM1</i>    | 1.2±0.278    | 0.9±0.63     | 1.69E-03 |
| cg27504805  | 4  | 156129725 | <i>NPY2R</i>    | -4.386±0.335 | -4.095±0.583 | 1.69E-03 |
| cg24735489  | 6  | 31088352  | <i>CDSN</i>     | 1.191±0.346  | 0.845±0.72   | 1.70E-03 |
| cg27190239  | 12 | 10085174  | <i>CLEC2A</i>   | -0.482±0.363 | -0.765±0.547 | 1.70E-03 |

|            |    |           |             |              |              |          |
|------------|----|-----------|-------------|--------------|--------------|----------|
| cg21509097 | 16 | 68279613  | PLA2G15     | -3.259±0.253 | -3.091±0.298 | 1.71E-03 |
| cg06832950 | 14 | 51025891  | ATL1        | 3.015±0.18   | 2.895±0.213  | 1.71E-03 |
| cg00029826 | 14 | 20801459  | CCNB1IP1    | -2.722±0.733 | -3.151±0.678 | 1.71E-03 |
| cg02548238 | 5  | 121413050 | LOX         | -4.253±0.488 | -3.876±0.726 | 1.72E-03 |
| cg07338205 | 2  | 169757780 | G6PC2       | 0.638±0.256  | 0.325±0.666  | 1.72E-03 |
| cg08268266 | 16 | 11680284  | LITAF       | -3.42±0.613  | -3.815±0.683 | 1.72E-03 |
| cg25017250 | 19 | 45445693  | APOC4-APOC2 | 0.014±0.266  | -0.218±0.445 | 1.73E-03 |
| cg23274244 | 17 | 16875951  | TNFRSF13B   | 2.315±0.233  | 2.126±0.373  | 1.73E-03 |
| cg06806080 | 3  | 107810791 | CD47        | 2.643±0.214  | 2.979±0.739  | 1.73E-03 |
| cg02347114 | 2  | 99871669  | LYG2        | 2.536±0.348  | 2.222±0.64   | 1.73E-03 |
| cg02863842 | 19 | 45349685  | PVRL2       | -5.098±0.478 | -4.762±0.617 | 1.73E-03 |
| cg09163442 | 7  | 54827431  | SEC61G      | -3.884±0.573 | -4.277±0.714 | 1.74E-03 |
| cg27377450 | 19 | 7446301   | 0           | 2.619±0.392  | 2.273±0.7    | 1.74E-03 |
| cg07463059 | 1  | 158979810 | IFI16       | -3.527±0.471 | -3.969±0.908 | 1.74E-03 |
| cg10798171 | 7  | 8302301   | ICA1        | -1.238±0.315 | -1.452±0.386 | 1.74E-03 |
| cg23221013 | 7  | 99817027  | PVRIG       | 0.759±0.327  | 0.502±0.498  | 1.74E-03 |
| cg13643796 | 4  | 73434209  | ADAMTS3     | -4.753±0.453 | -4.414±0.646 | 1.75E-03 |
| cg02523400 | 22 | 21128191  | SERPIND1    | 1.957±0.345  | 2.271±0.64   | 1.75E-03 |
| cg12489819 | 1  | 155278858 | FDPS        | -3.796±0.574 | -4.111±0.459 | 1.75E-03 |
| cg21787291 | 6  | 124125170 | NKAIN2      | -4.338±0.852 | -3.672±1.294 | 1.75E-03 |
| cg16243646 | 4  | 110651822 | PLA2G12A    | -3.355±0.294 | -3.539±0.314 | 1.76E-03 |
| cg19560210 | 1  | 230513337 | PGBD5       | 2.033±0.479  | 2.418±0.755  | 1.76E-03 |
| cg14277848 | 1  | 156570825 | GPATCH4     | -3.466±0.554 | -3.813±0.59  | 1.76E-03 |
| cg08434547 | 17 | 40272901  | KAT2A       | -4.78±0.417  | -4.478±0.565 | 1.76E-03 |
| cg14472778 | 1  | 11867308  | MTHFR       | 0.111±0.261  | 0.448±0.731  | 1.77E-03 |
| cg00691625 | 9  | 127269807 | NR5A1       | 2.521±0.303  | 2.271±0.496  | 1.77E-03 |
| cg01870826 | 7  | 5111875   | RBAKDN      | -2.079±0.552 | -1.429±1.393 | 1.78E-03 |
| cg22022041 | 3  | 45928137  | CCR9        | 2.329±0.148  | 2.169±0.338  | 1.78E-03 |
| cg22620680 | 3  | 122920514 | SEC22A      | -3.564±0.245 | -3.7±0.2     | 1.79E-03 |
| cg16358738 | 2  | 241808595 | AGXT        | 2.606±0.396  | 2.303±0.585  | 1.79E-03 |
| cg27345946 | 3  | 9835511   | ARPC4       | -0.764±0.231 | -1.014±0.53  | 1.80E-03 |
| cg13454184 | 1  | 150459676 | TARS2       | -4.554±0.512 | -4.861±0.502 | 1.80E-03 |
| cg15767406 | 3  | 44626029  | ZNF660      | -4.888±0.559 | -4.505±0.699 | 1.80E-03 |
| cg18711066 | 16 | 68118822  | NFATC3      | -4.129±0.5   | -3.566±1.201 | 1.81E-03 |
| cg07267296 | 8  | 28748995  | HMBBOX1     | -4.08±0.399  | -3.834±0.416 | 1.81E-03 |
| cg11255163 | 16 | 68771200  | CDH1        | -4.882±0.594 | -4.424±0.888 | 1.81E-03 |
| cg23615676 | 5  | 113697632 | KCNN2       | -4.082±0.474 | -3.696±0.761 | 1.81E-03 |
| cg09084200 | 11 | 134095863 | VPS26B      | -1.686±0.243 | -1.398±0.621 | 1.82E-03 |
| cg03165378 | 1  | 153329882 | S100A9      | 1.667±0.263  | 1.375±0.621  | 1.83E-03 |
| cg26866014 | 7  | 148287712 | C7orf33     | 1.558±0.344  | 1.813±0.485  | 1.83E-03 |
| cg10528989 | 14 | 96722306  | BDKRB1      | 0.491±0.289  | 0.175±0.674  | 1.83E-03 |
| cg00987379 | 8  | 28244386  | ZNF395      | -3.933±0.487 | -3.618±0.554 | 1.84E-03 |
| cg07595113 | 8  | 67525279  | MYBL1       | -4.13±0.46   | -3.827±0.541 | 1.84E-03 |
| cg08301503 | 6  | 33561188  | LINC00336   | -0.756±0.251 | -1.254±1.116 | 1.84E-03 |
| cg21443584 | 14 | 36789985  | MBIP        | -5.013±0.356 | -5.217±0.32  | 1.84E-03 |
| cg03462055 | 6  | 3227556   | TUBB2B      | -4.275±0.396 | -3.767±1.105 | 1.85E-03 |
| cg02210123 | 14 | 63670835  | RHOJ        | -4.107±0.472 | -3.674±0.89  | 1.85E-03 |
| cg22882178 | 10 | 104001226 | PITX3       | -4.447±0.335 | -3.898±1.219 | 1.85E-03 |
| cg21237591 | 11 | 2162510   | IGF2        | -2.159±0.328 | -1.728±0.941 | 1.85E-03 |
| cg25203980 | 1  | 1238595   | ACAP3       | 3.432±0.423  | 3.719±0.523  | 1.85E-03 |
| cg05959508 | 1  | 209929512 | TRAF3IP3    | 1.073±0.369  | 0.688±0.814  | 1.85E-03 |
| cg16377880 | 19 | 15751167  | CYP4F3      | 0.587±0.304  | 0.282±0.639  | 1.85E-03 |
| cg22444610 | 2  | 201375087 | KCTD18      | -3.675±0.378 | -3.907±0.392 | 1.85E-03 |
| cg09088193 | 17 | 39122765  | KRT39       | 2.534±0.278  | 2.756±0.44   | 1.86E-03 |
| cg08319991 | 4  | 41259283  | UCHL1       | -4.247±0.468 | -3.66±1.274  | 1.86E-03 |
| cg03528946 | 9  | 38069800  | SHB         | -3.318±0.411 | -3.574±0.438 | 1.86E-03 |
| cg22294908 | 20 | 39928631  | ZHX3        | 2.688±0.156  | 2.417±0.605  | 1.86E-03 |
| cg17942553 | 1  | 150850380 | ARNT        | 1.887±0.331  | 1.612±0.551  | 1.87E-03 |
| cg15178040 | 6  | 52711494  | GSTA5       | 2.22±0.423   | 2.483±0.446  | 1.87E-03 |
| cg11609344 | 7  | 44240862  | YKT6        | -3.622±0.402 | -3.867±0.411 | 1.87E-03 |
| cg20651681 | 7  | 50861418  | GRB10       | -3.288±0.454 | -2.977±0.572 | 1.87E-03 |
| cg20900524 | 1  | 40563271  | PPT1        | -4.152±0.565 | -4.49±0.557  | 1.87E-03 |
| cg18053607 | 22 | 31518963  | INPP5J      | -1.516±0.489 | -1.111±0.809 | 1.88E-03 |
| cg12370791 | 17 | 46703650  | HOXB9       | -4.316±0.336 | -3.593±1.63  | 1.88E-03 |
| cg18879041 | 2  | 110656797 | LIMS3L      | 0.764±0.291  | 1±0.47       | 1.88E-03 |
| cg04523589 | 3  | 48265146  | CAMP        | 2.893±0.43   | 2.565±0.636  | 1.88E-03 |
| cg09497789 | 1  | 118728212 | SPAG17      | -3.051±0.359 | -2.772±0.546 | 1.88E-03 |
| cg22297305 | 22 | 18923471  | PRODH       | -4.879±0.458 | -4.583±0.523 | 1.89E-03 |
| cg08999352 | 9  | 130547210 | MIR3960     | -2.344±0.306 | -2.564±0.417 | 1.89E-03 |
| cg13391638 | 7  | 112430772 | TMEM168     | -3.069±0.358 | -3.354±0.563 | 1.90E-03 |

|            |    |           |           |              |              |          |
|------------|----|-----------|-----------|--------------|--------------|----------|
| cg05654163 | 14 | 21467502  | SLC39A2   | 1.092±0.244  | 0.738±0.783  | 1.90E-03 |
| cg07284407 | 20 | 57429858  | GNAS      | 0.55±0.147   | 0.311±0.532  | 1.90E-03 |
| cg17530977 | 7  | 42275872  | GLI3      | -4.648±0.428 | -4.337±0.591 | 1.91E-03 |
| cg00269932 | 19 | 55013296  | LAIR2     | 3.911±0.428  | 3.455±0.97   | 1.91E-03 |
| cg22038738 | 8  | 42064673  | PLAT      | 0.496±0.281  | 0.855±0.782  | 1.91E-03 |
| cg14959707 | 16 | 11876391  | ZC3H7A    | 1.751±0.235  | 1.454±0.648  | 1.92E-03 |
| cg02932689 | 16 | 87425223  | FBXO31    | -4.057±0.358 | -4.263±0.327 | 1.92E-03 |
| cg16249454 | 4  | 74965075  | CXCL2     | -5.031±0.58  | -4.625±0.758 | 1.92E-03 |
| cg17470143 | 13 | 36706433  | DCLK1     | 0.344±0.327  | 0.013±0.698  | 1.92E-03 |
| cg25827139 | 17 | 8128467   | LINC00324 | 3.263±0.257  | 3.025±0.49   | 1.92E-03 |
| cg26741595 | 6  | 26158391  | HIST1H2BD | -2.372±0.347 | -2.577±0.337 | 1.92E-03 |
| cg04926244 | 12 | 24737251  | LINC00477 | 2.35±0.348   | 2.083±0.518  | 1.92E-03 |
| cg11481351 | 1  | 109265387 | FNDC7     | 1.575±0.258  | 1.796±0.448  | 1.93E-03 |
| cg26309498 | 2  | 109607038 | EDAR      | 2.044±0.387  | 1.769±0.517  | 1.93E-03 |
| cg16175263 | 8  | 22960385  | TNFRSF10C | -2.005±0.264 | -2.206±0.392 | 1.94E-03 |
| cg14023451 | 6  | 24489887  | GPLD1     | 1.473±0.251  | 1.14±0.73    | 1.95E-03 |
| cg22322184 | 19 | 7734203   | RETN      | 0.931±0.252  | 1.169±0.496  | 1.95E-03 |
| cg08888956 | 12 | 86267839  | NTS       | -0.158±0.185 | 0.167±0.729  | 1.96E-03 |
| cg06391660 | 2  | 74608183  | DCTN1     | 3.094±0.212  | 2.948±0.27   | 1.98E-03 |
| cg25202471 | 6  | 10415540  | TFAP2A    | -2.451±0.355 | -1.975±1.046 | 1.98E-03 |
| cg08965235 | 11 | 65325158  | LTBP3     | -1.786±0.42  | -1.442±0.688 | 1.98E-03 |
| cg23325242 | 22 | 43044788  | CYB5R3    | -3.866±0.378 | -3.621±0.437 | 1.99E-03 |
| cg11558474 | 9  | 74382743  | TMEM2     | -3.071±0.344 | -2.854±0.38  | 1.99E-03 |
| cg01184449 | 2  | 42396170  | EML4      | 0.389±0.194  | 0.673±0.63   | 1.99E-03 |
| cg12858514 | 1  | 17575607  | PADI3     | 2.668±0.424  | 3.067±0.834  | 1.99E-03 |
| cg06883149 | 18 | 47901188  | SKA1      | -4.799±0.452 | -5.083±0.495 | 1.99E-03 |
| cg19615059 | 12 | 110270919 | MIR4497   | -3.609±0.412 | -3.316±0.553 | 1.99E-03 |
| cg26298099 | 14 | 76837758  | ESRRB     | 2.186±0.258  | 1.866±0.699  | 1.99E-03 |
| cg22536398 | 16 | 2521659   | NTN3      | -4.389±0.462 | -3.953±0.912 | 2.00E-03 |
| cg24435562 | 5  | 140593453 | PCDH13    | -3.373±0.576 | -2.918±0.9   | 2.00E-03 |
| cg06509239 | 2  | 19558569  | OSR1      | -3.982±0.351 | -3.605±0.807 | 2.00E-03 |
| cg07047653 | 12 | 50344626  | AQP2      | 2.673±0.22   | 2.517±0.295  | 2.01E-03 |
| cg26873164 | 20 | 48598975  | SNAI1     | -3.207±0.359 | -3.547±0.71  | 2.01E-03 |
| cg18678185 | 19 | 48895030  | KDELR1    | -3.007±0.369 | -3.294±0.566 | 2.02E-03 |
| cg16213655 | 16 | 4987532   | PPL       | -3.064±0.532 | -3.37±0.49   | 2.02E-03 |
| cg14189614 | 5  | 33984660  | SLC45A2   | 2.114±0.14   | 2.026±0.154  | 2.02E-03 |
| cg04115602 | 19 | 49552606  | CGB8      | 0.117±0.117  | 0.227±0.23   | 2.03E-03 |
| cg21006686 | 12 | 117800240 | NOS1      | 0.174±0.267  | -0.197±0.819 | 2.03E-03 |
| cg07011110 | 6  | 26500482  | BTN1A1    | 2.177±0.188  | 1.984±0.409  | 2.04E-03 |
| cg05044994 | 3  | 187896605 | FLJ42393  | 0.313±0.238  | 0.006±0.674  | 2.04E-03 |
| cg05063104 | 12 | 101603329 | SLC5A8    | -1.194±0.387 | -0.842±0.732 | 2.04E-03 |
| cg05779272 | 9  | 33168018  | B4GALT1   | -0.497±0.174 | -0.691±0.419 | 2.05E-03 |
| cg11181795 | 17 | 7219971   | GPS2      | 4.451±0.27   | 4.241±0.414  | 2.05E-03 |
| cg06630567 | 9  | 116840435 | AMBP      | -0.048±0.293 | 0.377±0.945  | 2.06E-03 |
| cg25840094 | 1  | 196945530 | CFHR5     | 0.898±0.269  | 0.524±0.83   | 2.09E-03 |
| cg17891149 | 1  | 154948248 | MIR4258   | -3.717±0.522 | -4.026±0.516 | 2.10E-03 |
| cg07703337 | 19 | 52847943  | ZNF610    | 1.816±0.367  | 1.518±0.599  | 2.11E-03 |
| cg15467759 | 5  | 149900327 | NDST1     | 3.815±0.36   | 4.017±0.317  | 2.11E-03 |
| cg08958913 | 19 | 40193890  | LGALS14   | 1.518±0.313  | 1.205±0.665  | 2.11E-03 |
| cg21351994 | 2  | 73145006  | EMX1      | -4.174±0.653 | -3.439±1.594 | 2.11E-03 |
| cg14154330 | 17 | 43503401  | ARHGAP27  | -0.334±0.253 | -0.618±0.615 | 2.11E-03 |
| cg24760768 | 6  | 38690878  | DNAH8     | 3.44±0.466   | 3.735±0.523  | 2.11E-03 |
| cg06720956 | 15 | 53082145  | ONECUT1   | -4.525±0.617 | -4.09±0.824  | 2.11E-03 |
| cg07706362 | 19 | 23578365  | ZNF91     | -4.066±0.484 | -3.721±0.659 | 2.12E-03 |
| cg26365553 | 11 | 47290613  | MADD      | -4.223±0.49  | -4.696±0.999 | 2.12E-03 |
| cg15726245 | 13 | 27333506  | GPR12     | 1.566±0.332  | 1.842±0.56   | 2.13E-03 |
| cg02417264 | 7  | 45197727  | RAMP3     | -0.889±0.294 | -0.599±0.616 | 2.14E-03 |
| cg20692181 | 19 | 7733174   | RETN      | 0.913±0.428  | 0.624±0.538  | 2.15E-03 |
| cg20261167 | 4  | 88896942  | SPP1      | -1.07±0.417  | -0.565±1.108 | 2.16E-03 |
| cg22842233 | 3  | 118892068 | UPK1B     | 1.692±0.245  | 1.915±0.467  | 2.17E-03 |
| cg05016508 | 11 | 63871570  | FLRT1     | 5.292±0.53   | 4.916±0.718  | 2.17E-03 |
| cg08353146 | 1  | 205196756 | TMCC2     | -4.217±0.308 | -4.036±0.3   | 2.17E-03 |
| cg18265887 | 22 | 37640250  | RAC2      | -3.514±0.307 | -3.682±0.257 | 2.18E-03 |
| cg15457079 | 10 | 101841816 | CPN1      | 0.816±0.282  | 0.522±0.632  | 2.18E-03 |
| cg11916609 | 2  | 102927488 | IL1RL1    | 0.736±0.304  | 0.465±0.564  | 2.19E-03 |
| cg08615333 | 14 | 76447413  | TGFB3     | 0.167±0.272  | -0.241±0.914 | 2.19E-03 |
| cg17714799 | 4  | 110625080 | CASP6     | -1.426±0.405 | -1.067±0.747 | 2.19E-03 |
| cg14178991 | 4  | 76440699  | THAP6     | 0.46±0.394   | 0.113±0.72   | 2.19E-03 |
| cg22468055 | 3  | 122334227 | PARP15    | -0.967±0.332 | -0.715±0.496 | 2.19E-03 |
| cg10599444 | 14 | 23305941  | MMP14     | -1.571±0.525 | -1.166±0.803 | 2.19E-03 |

|            |    |           |           |              |              |          |
|------------|----|-----------|-----------|--------------|--------------|----------|
| cg12022621 | 1  | 203734505 | LAX1      | -0.829±0.235 | -1.165±0.752 | 2.20E-03 |
| cg04356968 | 1  | 156212005 | BGLAP     | 2.456±0.195  | 2.272±0.39   | 2.20E-03 |
| cg03138091 | 5  | 38846540  | OSMR      | -3.355±0.57  | -2.953±0.767 | 2.20E-03 |
| cg15422784 | 1  | 90023713  | LRRC8B    | 2.901±0.226  | 2.738±0.313  | 2.20E-03 |
| cg23540518 | 1  | 228604566 | TRIM17    | -0.997±0.518 | -1.311±0.539 | 2.21E-03 |
| cg23680518 | 19 | 36020232  | SBSN      | 1.505±0.241  | 1.143±0.814  | 2.22E-03 |
| cg27146152 | 17 | 6659364   | XAF1      | -4.547±0.45  | -4.828±0.494 | 2.22E-03 |
| cg20938689 | 5  | 85913915  | COX7C     | -0.791±0.293 | -0.621±0.278 | 2.22E-03 |
| cg15317267 | 11 | 2018247   | MIR675    | 1.297±0.25   | 1.044±0.544  | 2.23E-03 |
| cg03825921 | 1  | 229407517 | RAB4A     | -1.989±0.451 | -2.256±0.451 | 2.23E-03 |
| cg23606023 | 16 | 89042948  | CBFA2T3   | 0.813±0.22   | 0.57±0.53    | 2.26E-03 |
| cg03907174 | 19 | 50030461  | RCN3      | 2.195±0.377  | 2.536±0.715  | 2.27E-03 |
| cg08970446 | 1  | 53608262  | SLC1A7    | 4.177±0.436  | 3.806±0.763  | 2.27E-03 |
| cg19777783 | 12 | 129309376 | SLC15A4   | 0.826±0.24   | 0.527±0.662  | 2.28E-03 |
| cg27087809 | 15 | 78527410  | ACSBG1    | 1.893±0.287  | 1.62±0.58    | 2.28E-03 |
| cg00503458 | 1  | 155904439 | KIAA0907  | -3.573±0.588 | -3.951±0.681 | 2.29E-03 |
| cg23283495 | 1  | 209979779 | IRF6      | -2.469±0.495 | -2.814±0.659 | 2.29E-03 |
| cg27043141 | 3  | 111851265 | GCSAM     | 1.163±0.358  | 0.885±0.557  | 2.30E-03 |
| cg22587758 | 11 | 18258323  | SAA4      | 0.177±0.256  | -0.156±0.733 | 2.30E-03 |
| cg03469082 | 4  | 46126448  | GABRG1    | -3.936±0.503 | -3.538±0.802 | 2.31E-03 |
| cg19133618 | 9  | 22008970  | CDKN2B    | -4.696±0.628 | -4.314±0.666 | 2.31E-03 |
| cg07613153 | 14 | 104436947 | TDRD9     | 0.066±0.341  | -0.273±0.725 | 2.31E-03 |
| cg05323436 | 3  | 49171185  | LAMB2     | -4.437±0.565 | -4.106±0.555 | 2.31E-03 |
| cg23759710 | 2  | 42990957  | OXER1     | 1.227±0.137  | 1.337±0.222  | 2.31E-03 |
| cg17386433 | 1  | 28052708  | FAM76A    | -5.368±0.571 | -5.006±0.651 | 2.31E-03 |
| cg07705835 | 3  | 9959128   | IL17RC    | -1.218±0.401 | -0.897±0.651 | 2.31E-03 |
| cg08771731 | 5  | 17216434  | BASP1     | -4.401±0.468 | -4.73±0.631  | 2.31E-03 |
| cg15799267 | 17 | 7942406   | ALOX15B   | -1.109±0.313 | -1.37±0.537  | 2.32E-03 |
| cg11768886 | 4  | 5052795   | STK32B    | -5.251±0.545 | -4.852±0.78  | 2.32E-03 |
| cg14471615 | 11 | 76494102  | TSKU      | -5.05±0.406  | -4.763±0.552 | 2.32E-03 |
| cg25214346 | 1  | 161207966 | NR1I3     | 2.052±0.288  | 2.3±0.516    | 2.32E-03 |
| cg21993406 | 5  | 68484783  | CENPH     | -0.801±0.329 | -1.112±0.658 | 2.32E-03 |
| cg03743584 | 10 | 135160908 | PRAP1     | -2.31±0.477  | -1.921±0.795 | 2.34E-03 |
| cg13969584 | 16 | 90038469  | AFG3L1P   | -3.496±0.496 | -3.122±0.741 | 2.34E-03 |
| cg21926138 | 1  | 111889420 | PIFO      | -2.914±0.387 | -3.188±0.528 | 2.34E-03 |
| cg22406518 | 3  | 134093627 | AMOTL2    | -3.411±0.265 | -3.224±0.36  | 2.34E-03 |
| cg26025944 | 16 | 23193717  | SCNN1G    | -3.517±0.42  | -3.798±0.525 | 2.35E-03 |
| cg05988645 | 16 | 8715306   | METTL22   | -2.031±0.54  | -2.396±0.686 | 2.35E-03 |
| cg17233935 | 21 | 39577230  | DSCR10    | 1.332±0.304  | 1.102±0.453  | 2.35E-03 |
| cg13765303 | 3  | 112931390 | BOC       | -4.185±0.383 | -3.775±0.894 | 2.36E-03 |
| cg24789869 | 12 | 31227241  | DDX11-AS1 | -4.323±0.761 | -4.755±0.7   | 2.36E-03 |
| cg16334519 | 3  | 160395694 | ARL14     | 0.798±0.2    | 0.411±0.889  | 2.36E-03 |
| cg27641018 | 7  | 37959755  | EPDR1     | 1.684±0.268  | 1.403±0.608  | 2.37E-03 |
| cg08026144 | 9  | 78505312  | PCSK5     | -3.859±0.317 | -3.668±0.328 | 2.37E-03 |
| cg21792737 | 6  | 155776999 | NOX3      | -0.555±0.241 | -0.857±0.671 | 2.37E-03 |
| cg23621115 | 22 | 38452869  | PICK1     | 0.882±0.272  | 0.575±0.673  | 2.37E-03 |
| cg02431964 | 2  | 119700029 | MARCO     | 2.524±0.266  | 2.127±0.896  | 2.37E-03 |
| cg17078393 | 1  | 32717002  | LCK       | 1.809±0.497  | 1.367±0.928  | 2.38E-03 |
| cg17164520 | 19 | 49540241  | SNAR-G1   | 1.086±0.23   | 1.251±0.319  | 2.38E-03 |
| cg24492022 | 16 | 18802110  | RPS15A    | 2.406±0.337  | 2.076±0.709  | 2.39E-03 |
| cg07965823 | 14 | 77964712  | ISM2      | -3.315±0.48  | -2.766±1.21  | 2.39E-03 |
| cg00461841 | 16 | 10523485  | ATF7IP2   | 1.118±0.313  | 0.817±0.637  | 2.39E-03 |
| cg03887787 | 11 | 65647532  | CTSW      | 0.461±0.329  | 0.165±0.624  | 2.40E-03 |
| cg06950730 | 11 | 117069479 | TAGLN     | 1.096±0.242  | 0.834±0.572  | 2.42E-03 |
| cg17277939 | 12 | 70093008  | BEST3     | 3.179±0.295  | 2.767±0.93   | 2.42E-03 |
| cg17237881 | 20 | 61867533  | BIRC7     | 3.095±0.202  | 2.937±0.319  | 2.42E-03 |
| cg10670077 | 19 | 7293341   | INSR      | -0.454±0.312 | -0.181±0.571 | 2.44E-03 |
| cg07499372 | 19 | 57631232  | USP29     | 4.212±0.443  | 3.9±0.605    | 2.44E-03 |
| cg10784341 | 6  | 143929300 | PHACTR2   | -0.636±0.29  | -0.296±0.753 | 2.44E-03 |
| cg05149586 | 12 | 113859869 | SDSL      | -2.219±0.295 | -2.389±0.285 | 2.45E-03 |
| cg14550066 | 19 | 55417500  | NCR1      | -0.296±0.365 | 0.099±0.863  | 2.45E-03 |
| cg15652212 | 7  | 142981776 | TMEM139   | 1.518±0.262  | 0.996±1.202  | 2.46E-03 |
| cg17691309 | 9  | 35690459  | TPM2      | -6.319±0.826 | -5.687±1.269 | 2.47E-03 |
| cg07393322 | 22 | 43117318  | A4GALT    | -2.928±0.349 | -2.676±0.496 | 2.48E-03 |
| cg26812418 | 4  | 166299976 | CPE       | -4.718±0.57  | -4.32±0.768  | 2.48E-03 |
| cg07232688 | 1  | 100644688 | LRRC39    | 1.321±0.357  | 1.529±0.346  | 2.49E-03 |
| cg27610561 | 20 | 45337784  | SLC2A10   | 2.315±0.381  | 1.869±0.99   | 2.50E-03 |
| cg24315860 | 7  | 105029492 | SRPK2     | -4.679±0.611 | -4.322±0.606 | 2.51E-03 |
| cg05955301 | 1  | 203444536 | PRELP     | -0.081±0.291 | 0.26±0.755   | 2.52E-03 |
| cg27387222 | 12 | 32831504  | DNM1L     | 3.048±0.344  | 2.814±0.447  | 2.52E-03 |

|            |    |           |             |              |              |          |
|------------|----|-----------|-------------|--------------|--------------|----------|
| cg03991326 | 8  | 74205489  | RPL7        | -2.097±0.405 | -2.344±0.437 | 2.52E-03 |
| cg16585682 | 5  | 180017623 | SCGB3A1     | -4.278±0.485 | -3.932±0.676 | 2.53E-03 |
| cg23579062 | 9  | 34457500  | FAM219A     | 0.403±0.23   | 0.629±0.488  | 2.54E-03 |
| cg08223235 | 18 | 60903834  | BCL2        | 1.917±0.344  | 1.67±0.483   | 2.54E-03 |
| cg15206445 | 16 | 89573312  | SPG7        | 0.717±0.275  | 1.009±0.638  | 2.55E-03 |
| cg04051458 | 15 | 39873060  | THBS1       | -4.815±0.329 | -4.627±0.311 | 2.55E-03 |
| cg09637363 | 11 | 69458644  | CCND1       | 0.841±0.24   | 0.599±0.525  | 2.55E-03 |
| cg09201719 | 10 | 104596890 | CYP17A1     | 2.351±0.364  | 1.949±0.887  | 2.56E-03 |
| cg03626672 | 2  | 237478664 | ACKR3       | -2.152±0.382 | -1.886±0.514 | 2.56E-03 |
| cg15677294 | 19 | 6502938   | TUBB4A      | 1.315±0.242  | 1.077±0.514  | 2.57E-03 |
| cg22873892 | 15 | 49447651  | COPS2       | -4.049±0.485 | -3.774±0.454 | 2.59E-03 |
| cg25027501 | 1  | 110283223 | GSTM3       | -4.499±0.491 | -4.07±0.905  | 2.59E-03 |
| cg05523047 | 9  | 2621379   | VLDLR       | -5.261±0.592 | -4.82±0.882  | 2.59E-03 |
| cg22857957 | 1  | 146697082 | FMO5        | -3.386±0.463 | -3.676±0.525 | 2.59E-03 |
| cg05830416 | 9  | 35665010  | ARHGEF39    | -4.369±0.241 | -4.51±0.241  | 2.60E-03 |
| cg20822628 | 20 | 61041592  | GATA5       | 4.351±0.621  | 3.762±1.268  | 2.60E-03 |
| cg12406417 | 22 | 23522551  | BCR         | -4.23±0.458  | -3.973±0.42  | 2.60E-03 |
| cg15897310 | 6  | 132272560 | CTGF        | -4.209±0.53  | -3.858±0.661 | 2.60E-03 |
| cg02803836 | 10 | 131412507 | MGMT        | 3.36±0.352   | 3.145±0.385  | 2.61E-03 |
| cg18250832 | 2  | 232395463 | NMUR1       | 0.527±0.128  | 0.722±0.447  | 2.61E-03 |
| cg17194182 | 7  | 100318154 | EPO         | -4.323±0.549 | -3.829±1.051 | 2.61E-03 |
| cg17414107 | 20 | 57427830  | GNAS        | -0.067±0.31  | -0.344±0.59  | 2.61E-03 |
| cg26817573 | 15 | 64126729  | HERC1       | -3.213±0.25  | -2.96±0.553  | 2.61E-03 |
| cg12717594 | 9  | 36037454  | RECK        | -5.355±0.652 | -4.869±0.976 | 2.62E-03 |
| cg18809535 | 15 | 59498670  | LDHAL6B     | 2.642±0.229  | 2.501±0.255  | 2.63E-03 |
| cg24235633 | 16 | 29875177  | CDIPT-AS1   | 2.619±0.435  | 2.104±1.15   | 2.63E-03 |
| cg14329157 | 2  | 228736135 | DAW1        | -2.482±0.359 | -2.176±0.641 | 2.63E-03 |
| cg22861316 | 5  | 159656660 | FABP6       | 2.44±0.285   | 2.233±0.411  | 2.64E-03 |
| cg05896682 | 18 | 74964030  | GALR1       | -2.172±0.646 | -1.677±1.002 | 2.64E-03 |
| cg05174079 | 9  | 67786742  | FAM27E3     | 2.103±0.28   | 1.902±0.398  | 2.64E-03 |
| cg02630694 | 10 | 12236833  | CDC123      | -2.066±0.412 | -2.326±0.475 | 2.64E-03 |
| cg24242519 | 2  | 16846569  | FAM49A      | -3.569±0.616 | -3.208±0.619 | 2.65E-03 |
| cg03695693 | 19 | 3932959   | NMRK2       | -3.024±0.34  | -2.755±0.55  | 2.65E-03 |
| cg17272843 | 11 | 77734280  | KCTD14      | -2.457±0.48  | -2.115±0.673 | 2.65E-03 |
| cg23276115 | 17 | 18950337  | GRAP        | -1.431±0.264 | -1.065±0.832 | 2.66E-03 |
| cg14070162 | 17 | 40575582  | PTRF        | -1.929±0.422 | -1.651±0.525 | 2.66E-03 |
| cg16745604 | 2  | 202047459 | CASP10      | -0.578±0.232 | -0.839±0.58  | 2.67E-03 |
| cg15398520 | 6  | 160932709 | LPAL2       | 1.268±0.363  | 0.87±0.881   | 2.67E-03 |
| cg25499099 | 17 | 7284662   | TNK1        | -2.579±0.455 | -2.198±0.796 | 2.67E-03 |
| cg25505610 | 11 | 32605184  | EIF3M       | -4.856±0.386 | -5.08±0.38   | 2.68E-03 |
| cg08328671 | 14 | 96671262  | BDKRB2      | -3.252±0.487 | -2.885±0.741 | 2.68E-03 |
| cg11997899 | 7  | 96654183  | DLX5        | -0.815±0.411 | -0.506±0.626 | 2.71E-03 |
| cg04459030 | 20 | 35885149  | GHRH        | 0.764±0.184  | 0.452±0.72   | 2.72E-03 |
| cg08040471 | 17 | 80407779  | C17orf62    | 0.956±0.411  | 0.536±0.923  | 2.72E-03 |
| cg12850636 | 19 | 3727602   | TJP3        | 1.963±0.257  | 1.785±0.347  | 2.72E-03 |
| cg05365729 | 8  | 23262073  | LOXL2       | -1.357±0.189 | -1.144±0.475 | 2.72E-03 |
| cg07109670 | 8  | 124085299 | TBC1D31     | -4.728±0.396 | -4.954±0.379 | 2.73E-03 |
| cg20974196 | 19 | 859983    | CFD         | -2.04±0.37   | -1.707±0.713 | 2.73E-03 |
| cg01182585 | 7  | 23338735  | MALSU1      | -4.506±0.679 | -4.895±0.659 | 2.75E-03 |
| cg19776201 | 19 | 58951434  | ZNF132      | -4.353±0.483 | -3.984±0.751 | 2.76E-03 |
| cg12240237 | 7  | 73946402  | GTF2IRD1    | 1.38±0.342   | 1.082±0.635  | 2.76E-03 |
| cg04624659 | 1  | 118727817 | SPAG17      | -3.395±0.378 | -3.013±0.838 | 2.76E-03 |
| cg11901954 | 1  | 212209499 | INTS7       | -4.161±0.473 | -4.484±0.623 | 2.76E-03 |
| cg10967280 | 12 | 91348999  | CCER1       | 4.785±0.31   | 4.579±0.393  | 2.76E-03 |
| cg06200339 | 5  | 157079404 | SOX30       | 2.49±0.363   | 2.08±0.915   | 2.76E-03 |
| cg02401978 | 7  | 149195465 | ZNF746      | 0.24±0.24    | 0.518±0.624  | 2.77E-03 |
| cg23029519 | 9  | 21187344  | IFNA4       | 1.592±0.347  | 1.358±0.449  | 2.77E-03 |
| cg07056057 | 17 | 56159620  | DYNLL2      | 1.052±0.223  | 0.588±1.085  | 2.77E-03 |
| cg18573251 | 11 | 61685748  | RAB3IL1     | 1.067±0.297  | 1.292±0.456  | 2.78E-03 |
| cg19512848 | 14 | 94463829  | LINC00521   | 1.048±0.313  | 1.331±0.607  | 2.78E-03 |
| cg19110684 | 5  | 156536955 | HAVCR2      | -0.535±0.335 | -0.887±0.778 | 2.79E-03 |
| cg12820481 | 1  | 211848760 | NEK2        | -3.975±0.236 | -4.138±0.318 | 2.80E-03 |
| cg13650156 | 7  | 99970502  | PILRA       | 0.997±0.273  | 1.284±0.637  | 2.81E-03 |
| cg02915837 | 12 | 3069243   | TEAD4       | -3.705±0.53  | -3.361±0.648 | 2.81E-03 |
| cg11130441 | 2  | 38358147  | CYP11B1-AS1 | -0.458±0.283 | -0.153±0.679 | 2.82E-03 |
| cg16356956 | 22 | 37317934  | CSF2RB      | 2.562±0.298  | 2.361±0.387  | 2.83E-03 |
| cg27321979 | 15 | 76352532  | C15orf27    | -3.726±0.245 | -3.545±0.365 | 2.83E-03 |
| cg24829483 | 4  | 15341641  | C1QTNF7     | 0.799±0.259  | 1.139±0.774  | 2.84E-03 |
| cg22313024 | 8  | 97248069  | UQCRB       | -2.987±0.275 | -2.688±0.666 | 2.84E-03 |
| cg27619475 | 17 | 73083881  | SLC16A5     | -4.835±0.92  | -4.202±1.236 | 2.85E-03 |

|            |    |           |            |              |              |          |
|------------|----|-----------|------------|--------------|--------------|----------|
| cg23750142 | 8  | 61193876  | CA8        | -5.411±0.684 | -4.785±1.349 | 2.85E-03 |
| cg14613832 | 10 | 94833615  | CYP26A1    | -5.192±0.482 | -4.653±1.207 | 2.85E-03 |
| cg26239233 | 16 | 10970801  | CIITA      | -1.344±0.387 | -1.815±1.064 | 2.85E-03 |
| cg14916288 | 17 | 34345136  | CCL23      | -1.339±0.268 | -0.967±0.85  | 2.86E-03 |
| cg10347418 | 1  | 23693926  | ZNF436     | 2.5±0.211    | 2.153±0.804  | 2.87E-03 |
| cg15679651 | 19 | 39108529  | MAP4K1     | -0.736±0.372 | -0.251±1.106 | 2.88E-03 |
| cg03163246 | 4  | 74921023  | PPBPP2     | 2.504±0.356  | 2.273±0.439  | 2.89E-03 |
| cg10708905 | 12 | 59313883  | LRIG3      | -2.874±0.792 | -2.392±0.87  | 2.89E-03 |
| cg06648029 | 3  | 119499749 | NR1I2      | 3.381±0.206  | 3.24±0.276   | 2.89E-03 |
| cg16005443 | 19 | 54727139  | LILRB3     | -2.141±0.483 | -1.835±0.569 | 2.90E-03 |
| cg10482024 | 1  | 65613042  | AK4        | -3.271±0.239 | -3.563±0.661 | 2.90E-03 |
| cg10929387 | 3  | 52864659  | ITIH4      | 2.067±0.425  | 1.643±0.932  | 2.90E-03 |
| cg21486954 | 17 | 42385289  | RUNDC3A    | -4.929±0.465 | -4.668±0.435 | 2.91E-03 |
| cg15625636 | 14 | 88472437  | GPR65      | 0.768±0.372  | 0.406±0.783  | 2.91E-03 |
| cg02417408 | 3  | 52280688  | PPM1M      | 0.011±0.226  | -0.282±0.667 | 2.91E-03 |
| cg10059104 | 22 | 21986360  | CCDC116    | 4.461±0.498  | 4.071±0.807  | 2.92E-03 |
| cg20337106 | 6  | 49429845  | MUT        | 0.25±0.274   | 0.554±0.676  | 2.92E-03 |
| cg00011459 | 16 | 8890425   | TMEM186    | 2.675±0.417  | 2.939±0.492  | 2.92E-03 |
| cg18374517 | 2  | 233271575 | ALPPL2     | 1.051±0.183  | 0.854±0.44   | 2.93E-03 |
| cg24890286 | 7  | 139317303 | HIPK2      | 2.131±0.468  | 2.408±0.487  | 2.93E-03 |
| cg25569462 | 4  | 189026860 | TRIML2     | 2.344±0.742  | 1.865±0.905  | 2.93E-03 |
| cg22336401 | 9  | 140336227 | ENTPD8     | -4.439±0.549 | -4.061±0.74  | 2.93E-03 |
| cg11599505 | 20 | 36532096  | VSTM2L     | 3.232±0.451  | 2.707±1.186  | 2.94E-03 |
| cg04498679 | 6  | 31895598  | C2         | -0.995±0.253 | -0.642±0.812 | 2.95E-03 |
| cg05393484 | 11 | 6818466   | OR6A2      | 2.081±0.382  | 1.73±0.757   | 2.95E-03 |
| cg02198044 | 15 | 56286336  | NEDD4      | -3.909±0.501 | -3.606±0.548 | 2.96E-03 |
| cg19872681 | 14 | 23284518  | SLC7A7     | 1.154±0.309  | 0.755±0.912  | 2.96E-03 |
| cg25134071 | 19 | 51506362  | KLK8       | 1.804±0.281  | 1.966±0.278  | 2.96E-03 |
| cg05501357 | 11 | 33308269  | HIPK3      | -0.111±0.413 | -0.482±0.801 | 2.96E-03 |
| cg14603345 | 20 | 11871375  | BTBD3      | -1.345±0.639 | -0.921±0.815 | 2.97E-03 |
| cg08666623 | 17 | 74582683  | ST6GALNAC2 | -2.894±0.415 | -2.566±0.683 | 2.99E-03 |
| cg15973234 | 15 | 81072152  | KIAA1199   | -3.363±0.381 | -3.113±0.479 | 2.99E-03 |
| cg07911673 | 17 | 8198092   | SLC25A35   | 1.462±0.175  | 1.253±0.473  | 2.99E-03 |
| cg21153758 | 5  | 52083992  | ITGA1      | -5.01±0.778  | -4.569±0.749 | 3.00E-03 |
| cg18114671 | 18 | 31803836  | NOL4       | -3.431±0.472 | -3.106±0.64  | 3.01E-03 |
| cg27491887 | 11 | 2554583   | KCNQ1      | -0.734±0.199 | -1.147±0.974 | 3.01E-03 |
| cg20769842 | 15 | 23810238  | MKRN3      | 0.842±0.296  | 0.512±0.742  | 3.01E-03 |
| cg25580018 | 9  | 136399808 | ADAMTSL2   | -5.254±0.506 | -4.854±0.835 | 3.02E-03 |
| cg12529801 | 16 | 9184705   | C16orf72   | -5.295±0.5   | -5.59±0.522  | 3.04E-03 |
| cg22375610 | 6  | 41021161  | APOBEC2    | 0.05±0.228   | 0.295±0.548  | 3.05E-03 |
| cg02110963 | 6  | 10434975  | LINC00518  | 1.962±0.255  | 2.231±0.601  | 3.05E-03 |
| cg26292028 | 12 | 109878728 | MYO1H      | 1.177±0.236  | 1.477±0.687  | 3.05E-03 |
| cg02873524 | 9  | 118916493 | PAPPA      | -4.052±0.544 | -3.644±0.839 | 3.05E-03 |
| cg21277505 | 19 | 50978348  | EMC10      | 2.726±0.311  | 2.946±0.44   | 3.06E-03 |
| cg02212836 | 6  | 6589075   | LY86       | 0.495±0.245  | 0.185±0.708  | 3.06E-03 |
| cg18174542 | 22 | 41956861  | CSDC2      | -2.353±0.357 | -1.954±0.899 | 3.07E-03 |
| cg19955257 | 19 | 699032    | 0          | 3.186±0.493  | 2.912±0.455  | 3.08E-03 |
| cg16026550 | 11 | 121323544 | SORL1      | -4.738±0.528 | -5.048±0.546 | 3.08E-03 |
| cg05659947 | 1  | 207262190 | C4BPB      | 0.197±0.237  | -0.129±0.753 | 3.09E-03 |
| cg13543096 | 16 | 30125400  | GDPD3      | 4.275±0.358  | 4.577±0.646  | 3.10E-03 |
| cg00415978 | 4  | 119809925 | SYNPO2     | -3.012±0.348 | -2.677±0.739 | 3.10E-03 |
| cg04770504 | 7  | 24797363  | DFNA5      | -5.097±0.469 | -4.382±1.666 | 3.11E-03 |
| cg14314889 | 17 | 3336771   | OR1E2      | -1.365±0.225 | -1.617±0.57  | 3.11E-03 |
| cg24173049 | 17 | 6939795   | SLC16A13   | -4.588±0.493 | -4.905±0.603 | 3.12E-03 |
| cg04988978 | 17 | 56359578  | MPO        | -0.309±0.271 | -0.701±0.911 | 3.12E-03 |
| cg23861715 | 9  | 99382235  | CDC14B     | -2.746±0.344 | -2.97±0.43   | 3.13E-03 |
| cg17705056 | 18 | 77711560  | PQLC1      | -3.207±0.511 | -2.919±0.491 | 3.13E-03 |
| cg07730301 | 11 | 67777952  | ALDH3B1    | -0.964±0.288 | -1.259±0.659 | 3.13E-03 |
| cg19256236 | 12 | 49932216  | KCNH3      | -3.015±0.264 | -2.74±0.618  | 3.15E-03 |
| cg22931889 | 20 | 57594545  | TUBB1      | 2.064±0.279  | 2.257±0.386  | 3.15E-03 |
| cg14688272 | 17 | 80673958  | FN3KRP     | -1.675±0.358 | -1.421±0.511 | 3.15E-03 |
| cg00261781 | 2  | 20212517  | MATN3      | -5.175±0.989 | -4.545±1.195 | 3.16E-03 |
| cg14288464 | 20 | 43743301  | WFDC5      | 2.18±0.247   | 2.398±0.471  | 3.17E-03 |
| cg25600606 | 11 | 33308345  | HIPK3      | 3.121±0.389  | 2.638±1.109  | 3.18E-03 |
| cg06956273 | 1  | 110155623 | GNAT2      | 2.285±0.308  | 1.987±0.659  | 3.18E-03 |
| cg17018527 | 15 | 83775931  | TM6SF1     | -4.537±0.444 | -4.2±0.698   | 3.18E-03 |
| cg15264255 | 8  | 99306718  | NIPAL2     | -2.433±0.363 | -2.668±0.45  | 3.19E-03 |
| cg17178888 | 5  | 159739851 | CCNJL      | -4.755±0.516 | -4.426±0.625 | 3.20E-03 |
| cg25097436 | 14 | 60336972  | RTN1       | -3.407±0.424 | -2.932±1.078 | 3.21E-03 |
| cg21644628 | 16 | 50099438  | HEATR3     | 1.161±0.546  | 1.455±0.477  | 3.21E-03 |

|            |    |           |               |              |              |          |
|------------|----|-----------|---------------|--------------|--------------|----------|
| cg23751724 | 20 | 13976403  | MACROD2       | -3.49±0.539  | -3.095±0.805 | 3.21E-03 |
| cg24926042 | 12 | 52799999  | KRT82         | 0.868±0.201  | 0.603±0.611  | 3.21E-03 |
| cg16480145 | 9  | 35489718  | RUSC2         | -5.636±0.509 | -5.324±0.575 | 3.22E-03 |
| cg25173010 | 1  | 145438031 | TXNIP         | -3.593±0.561 | -3.923±0.59  | 3.22E-03 |
| cg09772154 | 10 | 123358284 | FGFR2         | -3.38±0.421  | -3.116±0.496 | 3.23E-03 |
| cg23324787 | 11 | 36619694  | RAG2          | 1.989±0.368  | 1.72±0.548   | 3.23E-03 |
| cg06150468 | 1  | 212874085 | BATF3         | -4.478±0.51  | -4.05±0.917  | 3.23E-03 |
| cg19439331 | 10 | 70320470  | TET1          | -5.005±0.439 | -4.594±0.904 | 3.24E-03 |
| cg24777762 | 11 | 73087230  | RELT          | -4.005±0.274 | -4.164±0.282 | 3.25E-03 |
| cg24922992 | 6  | 43265547  | SLC22A7       | -0.201±0.198 | -0.001±0.447 | 3.25E-03 |
| cg11673969 | 7  | 100424945 | EPHB4         | -3.736±0.375 | -3.492±0.471 | 3.26E-03 |
| cg21877855 | 1  | 63989125  | EFCAB7        | -4.584±0.39  | -4.814±0.415 | 3.26E-03 |
| cg03050748 | 5  | 42423555  | GHR           | -4.241±0.592 | -3.865±0.716 | 3.26E-03 |
| cg11516606 | 9  | 100175029 | TDRD7         | -4.272±0.36  | -4.057±0.39  | 3.26E-03 |
| cg16547450 | 13 | 21141711  | IFT88         | -4.45±0.461  | -4.18±0.481  | 3.26E-03 |
| cg17980508 | 1  | 79085713  | IFI44L        | -2.624±0.513 | -2.281±0.675 | 3.26E-03 |
| cg23412777 | 15 | 55881706  | PYGO1         | 1.921±0.203  | 2.077±0.326  | 3.27E-03 |
| cg22402007 | 9  | 87282823  | NTRK2         | -2.871±0.383 | -2.465±0.916 | 3.27E-03 |
| cg21615663 | 16 | 19727911  | IQCK          | 2.322±0.219  | 1.946±0.887  | 3.28E-03 |
| cg03361068 | 14 | 51561562  | TRIM9         | -4.781±0.417 | -4.181±1.4   | 3.28E-03 |
| cg23280807 | 16 | 24857579  | SLC5A11       | 1.451±0.332  | 1.74±0.626   | 3.29E-03 |
| cg08368934 | 16 | 57701455  | GPR97         | 1.024±0.289  | 0.745±0.62   | 3.29E-03 |
| cg22580353 | 19 | 45146900  | PVR           | -0.184±0.251 | -0.417±0.512 | 3.30E-03 |
| cg13271951 | 16 | 30041760  | FAM57B        | -0.68±0.283  | -0.301±0.881 | 3.31E-03 |
| cg14579051 | 6  | 71012852  | COL9A1        | 1.079±0.237  | 1.266±0.395  | 3.32E-03 |
| cg09584711 | 16 | 72096944  | HPR           | -0.054±0.283 | -0.319±0.587 | 3.32E-03 |
| cg22609576 | 13 | 36920662  | SPG20         | -5.233±0.487 | -4.94±0.536  | 3.33E-03 |
| cg04826883 | 15 | 63673893  | CA12          | -4.367±0.405 | -4.149±0.358 | 3.33E-03 |
| cg25010118 | 18 | 65184398  | DSEL          | -3.857±0.577 | -3.501±0.666 | 3.33E-03 |
| cg08247612 | 1  | 160336486 | NHLH1         | 1.809±0.215  | 2.083±0.635  | 3.33E-03 |
| cg18291690 | 22 | 41252751  | ST13          | 0.183±0.149  | 0.307±0.267  | 3.34E-03 |
| cg20392764 | 11 | 2293117   | ASCL2         | 1.348±0.225  | 1.674±0.76   | 3.34E-03 |
| cg11043092 | 8  | 6287904   | MCPH1         | 3.294±0.33   | 3.481±0.324  | 3.35E-03 |
| cg04289385 | 6  | 36355825  | ETV7          | -1.141±0.554 | -1.629±1.062 | 3.36E-03 |
| cg13002506 | 11 | 76998821  | GDPD4         | 0.992±0.328  | 0.649±0.767  | 3.36E-03 |
| cg08532057 | 13 | 25875436  | NUPL1         | -2.038±0.462 | -1.616±0.93  | 3.37E-03 |
| cg05023116 | 19 | 56510892  | NLRP5         | 3.46±0.539   | 3.004±0.985  | 3.37E-03 |
| cg18966791 | 1  | 156399305 | C1orf61       | -4.3±0.414   | -3.937±0.791 | 3.37E-03 |
| cg16245844 | 12 | 1800488   | ADIPOR2       | -4.793±0.528 | -4.519±0.428 | 3.38E-03 |
| cg27657249 | 16 | 29691026  | QPRT          | -1.991±0.372 | -1.753±0.457 | 3.38E-03 |
| cg06290096 | 11 | 118475984 | PHLDB1        | 0.458±0.197  | 0.699±0.554  | 3.39E-03 |
| cg13315690 | 17 | 1944831   | OVCA2         | -2.418±0.362 | -2.124±0.628 | 3.40E-03 |
| cg21783004 | 5  | 135290288 | LECT2         | 1.826±0.29   | 1.612±0.444  | 3.40E-03 |
| cg22767466 | 11 | 89541866  | TRIM49        | 2.564±0.269  | 2.179±0.901  | 3.43E-03 |
| cg16109297 | 1  | 43824900  | CDC20         | -2.355±0.272 | -2.574±0.468 | 3.43E-03 |
| cg07074571 | 6  | 161695561 | AGPAT4        | -1.726±0.313 | -1.505±0.448 | 3.43E-03 |
| cg18219226 | 7  | 65447622  | GUSB          | -0.827±0.277 | -0.573±0.56  | 3.43E-03 |
| cg26937500 | 7  | 3083338   | CARD11        | -4.354±0.502 | -3.753±1.384 | 3.43E-03 |
| cg15299721 | 4  | 103997510 | SLC9B2        | -6.157±0.826 | -5.16±2.299  | 3.43E-03 |
| cg03843951 | 7  | 50629634  | DDC           | 1.95±0.267   | 1.735±0.459  | 3.43E-03 |
| cg19776090 | 17 | 73178957  | SUMO2         | -0.557±0.209 | -0.432±0.23  | 3.43E-03 |
| cg01182873 | 7  | 141464291 | TAS2R3        | 1.919±0.208  | 1.699±0.497  | 3.44E-03 |
| cg25836326 | 3  | 113898609 | DRD3          | -1.814±0.282 | -2.084±0.6   | 3.45E-03 |
| cg09191232 | 4  | 108642411 | PAPSS1        | -0.538±0.256 | -0.952±0.977 | 3.45E-03 |
| cg14349467 | 12 | 118574068 | PEBP1         | -0.417±0.199 | -0.297±0.223 | 3.46E-03 |
| cg23234999 | 15 | 23811205  | MKRN3         | 2.188±0.34   | 1.906±0.607  | 3.46E-03 |
| cg17786776 | 7  | 32996145  | FKBP9         | 0.862±0.281  | 0.62±0.529   | 3.46E-03 |
| cg11682508 | 20 | 61149399  | C20orf166-AS1 | 0.374±0.206  | 0.621±0.569  | 3.47E-03 |
| cg02901122 | 18 | 33647344  | RPRD1A        | -5.822±0.494 | -5.554±0.445 | 3.48E-03 |
| cg12202913 | 19 | 12846618  | C19orf43      | 0.986±0.292  | 0.644±0.787  | 3.49E-03 |
| cg15808558 | 2  | 222437611 | EPHA4         | -4.466±0.313 | -4.628±0.25  | 3.50E-03 |
| cg03140978 | 1  | 24728127  | STPG1         | 2.89±0.205   | 2.771±0.212  | 3.51E-03 |
| cg21358381 | 17 | 42019637  | PPY           | 2.574±0.24   | 2.358±0.476  | 3.51E-03 |
| cg10011623 | 20 | 57463527  | GNAS          | -0.495±0.247 | -0.777±0.648 | 3.51E-03 |
| cg17869167 | 2  | 102979704 | IL18R1        | 2.588±0.262  | 2.376±0.453  | 3.51E-03 |
| cg11418559 | 1  | 26487928  | FAM110D       | -0.898±0.342 | -0.614±0.613 | 3.52E-03 |
| cg25301180 | 3  | 56502091  | ERC2          | -4.523±0.31  | -4.264±0.562 | 3.53E-03 |
| cg04233664 | 10 | 126848743 | CTBP2         | -5.167±0.797 | -4.662±0.971 | 3.53E-03 |
| cg17886028 | 12 | 4383507   | CCND2         | -4.517±0.555 | -4.13±0.785  | 3.54E-03 |
| cg20495040 | 1  | 155107961 | SLC50A1       | -2.96±0.552  | -3.295±0.624 | 3.54E-03 |

|            |    |           |              |              |              |          |
|------------|----|-----------|--------------|--------------|--------------|----------|
| cg20331177 | 17 | 39334970  | KRTAP4-2     | 1.773±0.372  | 2.003±0.435  | 3.54E-03 |
| cg22791453 | 9  | 133319899 | ASS1         | -2.124±0.48  | -2.441±0.625 | 3.54E-03 |
| cg23583739 | 22 | 38863908  | KDELR3       | -4.849±0.433 | -4.575±0.526 | 3.55E-03 |
| cg18118795 | 1  | 33117735  | RBBP4        | 0.098±0.386  | -0.171±0.536 | 3.56E-03 |
| cg01109219 | 2  | 33660754  | RASGRP3      | -0.166±0.371 | -0.512±0.77  | 3.56E-03 |
| cg21478222 | 1  | 205601572 | ELK4         | -4.637±0.516 | -4.984±0.691 | 3.56E-03 |
| cg23578193 | 1  | 202163189 | LGR6         | -4.683±0.544 | -4.295±0.796 | 3.56E-03 |
| cg16745616 | 19 | 8428856   | ANGPTL4      | -3.365±0.272 | -3.072±0.67  | 3.57E-03 |
| cg02807948 | 11 | 2153991   | IGF2         | -0.221±0.147 | -0.423±0.474 | 3.60E-03 |
| cg26486663 | 16 | 2040863   | SYNGR3       | -3.866±0.272 | -3.532±0.777 | 3.60E-03 |
| cg05444024 | 19 | 5841072   | FUT6         | 2.71±0.343   | 2.496±0.41   | 3.61E-03 |
| cg22101147 | 3  | 52931946  | MEM110-MUSTN | -4.165±0.518 | -3.898±0.42  | 3.61E-03 |
| cg08785534 | 11 | 68451827  | GAL          | -3.282±0.357 | -3.024±0.534 | 3.62E-03 |
| cg03860400 | 11 | 13485289  | BTBD10       | -2.669±0.46  | -2.393±0.513 | 3.63E-03 |
| cg03264209 | 16 | 3931885   | 0            | 0.442±0.159  | 0.215±0.533  | 3.64E-03 |
| cg02055483 | 11 | 66188019  | NPAS4        | -2.954±0.41  | -2.628±0.699 | 3.64E-03 |
| cg10387416 | 3  | 10290486  | TATDN2       | -5.119±0.327 | -5.313±0.358 | 3.64E-03 |
| cg26565838 | 5  | 153570764 | GALNT10      | -3.853±0.446 | -4.126±0.517 | 3.68E-03 |
| cg19713460 | 22 | 39745530  | SYNGR1       | -2.218±0.403 | -1.779±1.006 | 3.70E-03 |
| cg07881407 | 17 | 34313744  | CCL14        | 0.096±0.203  | 0.358±0.615  | 3.70E-03 |
| cg18099844 | 15 | 34395540  | PGBD4        | 2.205±0.343  | 2.416±0.401  | 3.71E-03 |
| cg10207787 | 8  | 26148195  | PPP2R2A      | 2.999±0.187  | 2.794±0.471  | 3.71E-03 |
| cg18220560 | 2  | 17936424  | GEN1         | -2.708±0.332 | -2.344±0.835 | 3.71E-03 |
| cg00967316 | 7  | 113558794 | PPP1R3A      | 1.953±0.337  | 1.617±0.755  | 3.72E-03 |
| cg27497900 | 1  | 160312163 | NCSTN        | -4.417±0.566 | -4.718±0.494 | 3.72E-03 |
| cg13022129 | 9  | 131683862 | PHYHD1       | 3.193±0.45   | 2.792±0.888  | 3.73E-03 |
| cg12853521 | 18 | 13824359  | MC5R         | -2.546±0.467 | -2.878±0.682 | 3.74E-03 |
| cg01044662 | 2  | 75938360  | GCFC2        | -3.482±0.462 | -3.203±0.522 | 3.76E-03 |
| cg03900284 | 9  | 133769695 | QRF          | 1.712±0.265  | 1.959±0.553  | 3.76E-03 |
| cg22424746 | 1  | 117753313 | VTCN1        | 1.071±0.175  | 0.872±0.458  | 3.76E-03 |
| cg22484980 | 11 | 68815449  | TPCN2        | 4.188±0.334  | 3.87±0.717   | 3.76E-03 |
| cg25203561 | 19 | 45541192  | CLASRP       | 3.004±0.389  | 2.767±0.45   | 3.77E-03 |
| cg25149155 | 14 | 23775777  | BCL2L2       | -2.049±0.354 | -1.846±0.367 | 3.78E-03 |
| cg19669036 | 22 | 21212365  | PI4KA        | -4.905±0.498 | -4.635±0.46  | 3.78E-03 |
| cg22443330 | 15 | 31196599  | FAN1         | -2.148±0.452 | -1.819±0.685 | 3.78E-03 |
| cg03520136 | 2  | 158851300 | UPP2         | 2.085±0.295  | 1.866±0.462  | 3.79E-03 |
| cg01414934 | 1  | 26605969  | SH3BGR13     | -2.239±0.311 | -1.803±1.032 | 3.79E-03 |
| cg16944093 | 2  | 128422120 | LIMS2        | -1.162±0.265 | -0.937±0.494 | 3.82E-03 |
| cg23032612 | 13 | 38173340  | POSTN        | 0.505±0.367  | 0.212±0.627  | 3.83E-03 |
| cg22436229 | 1  | 26437241  | PDIK1L       | -3.567±0.304 | -3.382±0.348 | 3.83E-03 |
| cg21697134 | 17 | 80693839  | FN3K         | -3.759±0.565 | -3.384±0.753 | 3.84E-03 |
| cg03533811 | 15 | 43878085  | PPIP5K1      | 4.86±0.382   | 4.632±0.427  | 3.86E-03 |
| cg07084746 | 3  | 128294647 | C3orf27      | 1.752±0.345  | 1.958±0.385  | 3.86E-03 |
| cg01236137 | 5  | 32585526  | SUB1         | -3.458±0.553 | -3.846±0.8   | 3.87E-03 |
| cg17431739 | 10 | 23384047  | MSRB2        | -2.996±0.442 | -2.716±0.547 | 3.88E-03 |
| cg07143898 | 10 | 98945300  | SLIT1        | -4.65±0.431  | -4.212±1.001 | 3.89E-03 |
| cg10126923 | 19 | 51875451  | NKG7         | 1.808±0.337  | 1.47±0.772   | 3.89E-03 |
| cg05403071 | 20 | 48599682  | SNAI1        | -4.642±0.438 | -4.28±0.79   | 3.89E-03 |
| cg10801369 | 17 | 33417179  | RFFL         | 1.123±0.439  | 0.731±0.873  | 3.91E-03 |
| cg23043245 | 6  | 34434076  | PACSIN1      | -2.457±0.401 | -2.204±0.492 | 3.93E-03 |
| cg13954292 | 5  | 32445523  | ZFR          | 3.324±0.349  | 3.653±0.742  | 3.94E-03 |
| cg25921910 | 1  | 193090657 | CDC73        | -2.356±0.319 | -2.125±0.484 | 3.94E-03 |
| cg21480743 | 10 | 89621419  | KLLN         | -2.428±0.486 | -2.117±0.613 | 3.95E-03 |
| cg11710000 | 8  | 28352559  | FZD3         | -4.862±0.442 | -4.59±0.522  | 3.96E-03 |
| cg13675849 | 7  | 142631215 | TRPV5        | 2.244±0.271  | 1.821±1.012  | 3.97E-03 |
| cg11594228 | 22 | 20103649  | RANBP1       | 0.444±0.17   | 0.624±0.415  | 3.97E-03 |
| cg00168785 | 2  | 160142643 | WDSUB1       | -3.318±0.523 | -2.959±0.734 | 3.97E-03 |
| cg06682978 | 6  | 17394417  | CAP2         | -6.086±0.609 | -5.697±0.766 | 3.97E-03 |
| cg01410472 | 8  | 75896975  | CRISPLD1     | -3.663±0.476 | -3.253±0.906 | 3.98E-03 |
| cg25821963 | 5  | 148521171 | ABLM3        | -4.954±0.338 | -4.585±0.854 | 3.98E-03 |
| cg01982597 | 10 | 50733420  | PGBD3        | 2.133±0.263  | 2.301±0.33   | 3.98E-03 |
| cg08642068 | 20 | 31591776  | SUN5         | 1.626±0.395  | 1.906±0.583  | 4.00E-03 |
| cg04014889 | 15 | 23890593  | MAGEL2       | 1.847±0.199  | 1.511±0.808  | 4.00E-03 |
| cg10313633 | 11 | 44972890  | TP53I11      | 2.227±0.221  | 1.931±0.7    | 4.01E-03 |
| cg09501516 | 1  | 163039155 | RGS4         | -2.777±0.647 | -3.236±0.955 | 4.01E-03 |
| cg14271690 | 20 | 37209999  | ADIG         | 2.357±0.197  | 2.17±0.423   | 4.01E-03 |
| cg16823701 | 9  | 21440219  | IFNA1        | 1.662±0.339  | 1.436±0.456  | 4.01E-03 |
| cg13052755 | 8  | 128805589 | 0            | 3.173±0.385  | 3.415±0.473  | 4.01E-03 |
| cg11811840 | 2  | 234669166 | UGT1A1       | 2.016±0.294  | 1.702±0.724  | 4.01E-03 |
| cg08289932 | 9  | 38068663  | SHB          | -4.531±0.317 | -4.348±0.333 | 4.02E-03 |

|            |    |           |          |              |              |          |
|------------|----|-----------|----------|--------------|--------------|----------|
| cg08245789 | 22 | 40289538  | ENTHD1   | 3.799±0.455  | 4.087±0.565  | 4.02E-03 |
| cg01734338 | 11 | 2491231   | KCNQ1    | 1.531±0.497  | 1.199±0.671  | 4.02E-03 |
| cg01182697 | 1  | 54520432  | TCEANC2  | 0.945±0.298  | 1.22±0.619   | 4.03E-03 |
| cg27457941 | 3  | 139258754 | RBP1     | -4.506±0.442 | -4.215±0.584 | 4.03E-03 |
| cg11754206 | 8  | 73448579  | KCNB2    | -3.044±0.341 | -2.739±0.683 | 4.04E-03 |
| cg17452384 | 4  | 87374237  | MAPK10   | 2.774±0.351  | 2.54±0.473   | 4.05E-03 |
| cg16547341 | 19 | 57630691  | USP29    | 0.626±0.396  | 0.281±0.766  | 4.05E-03 |
| cg04833845 | 19 | 44286076  | KCNN4    | 0.916±0.325  | 0.627±0.647  | 4.05E-03 |
| cg18191162 | 6  | 39693228  | KIF6     | -4.374±0.274 | -4.23±0.237  | 4.05E-03 |
| cg18343292 | 11 | 60146078  | MS4A7    | -1.39±0.268  | -1.765±0.891 | 4.06E-03 |
| cg08700306 | 19 | 33686390  | LRP3     | -1.012±0.281 | -0.716±0.685 | 4.06E-03 |
| cg13857100 | 8  | 20041700  | SLC18A1  | 3.565±0.392  | 3.318±0.483  | 4.07E-03 |
| cg07294541 | 6  | 35265555  | DEF6     | -4.387±0.505 | -4.666±0.493 | 4.07E-03 |
| cg08570521 | 4  | 166794471 | TLL1     | -4.317±0.415 | -3.955±0.808 | 4.08E-03 |
| cg03705396 | 3  | 183543680 | MAP6D1   | -3.345±0.48  | -2.937±0.903 | 4.08E-03 |
| cg27462398 | 1  | 86174642  | ZNHIT6   | 2.541±0.381  | 2.046±1.173  | 4.08E-03 |
| cg17878972 | 3  | 192959356 | MGC2889  | -3.523±0.373 | -3.145±0.87  | 4.09E-03 |
| cg12360736 | 3  | 151985869 | MBNL1    | -2.493±0.296 | -2.056±1.046 | 4.09E-03 |
| cg23037133 | 13 | 97646811  | OXGR1    | -2.85±0.358  | -2.47±0.878  | 4.11E-03 |
| cg15433631 | 5  | 2751541   | IRX2     | -1.431±0.626 | -1.025±0.813 | 4.11E-03 |
| cg11434468 | 8  | 11059277  | XKR6     | -5.435±0.439 | -4.947±1.139 | 4.11E-03 |
| cg24526899 | 14 | 54424149  | BMP4     | 0.181±0.178  | 0.401±0.519  | 4.11E-03 |
| cg17259265 | 11 | 125753373 | HYLS1    | 1.493±0.252  | 1.798±0.718  | 4.11E-03 |
| cg14517922 | 7  | 65889460  | 0        | 3.02±0.183   | 2.912±0.203  | 4.12E-03 |
| cg11747499 | 12 | 109252653 | SSH1     | -3.231±0.461 | -2.908±0.672 | 4.12E-03 |
| cg08338368 | 12 | 68620926  | IL26     | 2.217±0.281  | 1.938±0.64   | 4.12E-03 |
| cg07196761 | 11 | 73586776  | PAAF1    | 2.726±0.215  | 2.538±0.422  | 4.15E-03 |
| cg17559711 | 14 | 23451724  | AJUBA    | -5.401±0.471 | -5.13±0.497  | 4.15E-03 |
| cg21145624 | 19 | 47922899  | MEIS3    | -3.838±0.429 | -3.561±0.554 | 4.16E-03 |
| cg27601516 | 14 | 23452417  | AJUBA    | -3.242±0.295 | -3.032±0.44  | 4.16E-03 |
| cg22209624 | 1  | 210406738 | SERTAD4  | -5.643±0.452 | -5.354±0.574 | 4.16E-03 |
| cg18199266 | 2  | 71048136  | CLEC4F   | 1.669±0.229  | 1.483±0.407  | 4.19E-03 |
| cg15240064 | 7  | 6746837   | ZNF12    | -3.032±0.626 | -3.386±0.642 | 4.19E-03 |
| cg26916607 | 16 | 56994770  | CETP     | 1.86±0.354   | 2.085±0.448  | 4.20E-03 |
| cg10712623 | 3  | 25469577  | RARB     | -2.421±0.204 | -2.306±0.211 | 4.20E-03 |
| cg10604333 | 19 | 44529262  | ZNF222   | -2.505±0.388 | -2.139±0.832 | 4.20E-03 |
| cg20359349 | 17 | 41994531  | FAM215A  | 1.417±0.247  | 1.087±0.785  | 4.20E-03 |
| cg08725962 | 5  | 175792493 | ARL10    | -6.444±0.616 | -5.891±1.244 | 4.21E-03 |
| cg18397653 | 4  | 88571653  | DMP1     | 1.238±0.218  | 1.431±0.433  | 4.21E-03 |
| cg08965324 | 12 | 96429827  | LTA4H    | -2.631±0.838 | -2.163±0.823 | 4.21E-03 |
| cg17565490 | 20 | 3766961   | CENPB    | -5.1±0.522   | -4.787±0.598 | 4.22E-03 |
| cg15603885 | 8  | 107782373 | ABRA     | 4.511±0.366  | 4.256±0.532  | 4.22E-03 |
| cg18501026 | 3  | 50712096  | MIR4787  | -3.034±0.336 | -2.693±0.787 | 4.23E-03 |
| cg09527362 | 6  | 74162142  | MB21D1   | -3.988±0.519 | -4.367±0.803 | 4.23E-03 |
| cg03139057 | 19 | 39989234  | DLL3     | -4.042±0.4   | -3.633±0.943 | 4.24E-03 |
| cg06605933 | 1  | 149870977 | BOLA1    | -1.73±0.303  | -2.091±0.851 | 4.25E-03 |
| cg01628803 | 2  | 98126764  | ANKRD36B | -0.392±0.22  | -0.541±0.304 | 4.25E-03 |
| cg15712267 | 19 | 14629905  | DNAJB1   | 0.884±0.277  | 0.492±0.94   | 4.25E-03 |
| cg13760253 | 8  | 66932700  | DNAJC5B  | 1.904±0.248  | 1.575±0.786  | 4.25E-03 |
| cg09538582 | 17 | 39637325  | KRT35    | 2.932±0.306  | 3.115±0.348  | 4.26E-03 |
| cg13300756 | 19 | 52228038  | HAS1     | -0.109±0.327 | 0.229±0.783  | 4.28E-03 |
| cg20395072 | 14 | 53258601  | GNPNAT1  | -2.191±0.358 | -1.768±0.998 | 4.31E-03 |
| cg03740216 | 19 | 10397561  | ICAM4    | -3.251±0.383 | -2.991±0.539 | 4.33E-03 |
| cg00364814 | 12 | 57691455  | R3HDM2   | 1.509±0.409  | 1.758±0.482  | 4.34E-03 |
| cg27170298 | 2  | 219524787 | BCS1L    | -3.137±0.651 | -3.534±0.77  | 4.34E-03 |
| cg26672426 | 9  | 132514582 | PTGES    | -0.247±0.352 | -0.573±0.742 | 4.34E-03 |
| cg11141561 | 5  | 134074404 | CAMLG    | -6.047±0.689 | -5.684±0.614 | 4.35E-03 |
| cg22733478 | 5  | 176036806 | GPRIN1   | -5.192±0.413 | -5.4±0.33    | 4.35E-03 |
| cg00796728 | 11 | 94276898  | FUT4     | -4.912±0.422 | -5.166±0.49  | 4.35E-03 |
| cg19549068 | 8  | 27472319  | CLU      | -4.534±0.267 | -4.38±0.289  | 4.37E-03 |
| cg26410550 | 15 | 25229256  | PWAR5    | 0.651±0.217  | 0.404±0.581  | 4.37E-03 |
| cg05745851 | 12 | 123259105 | CCDC62   | -5.284±0.571 | -4.97±0.558  | 4.37E-03 |
| cg17561435 | 7  | 33944927  | BMPER    | -3.985±0.356 | -3.578±0.957 | 4.38E-03 |
| cg22199118 | 8  | 69350927  | C8orf34  | 0.131±0.22   | -0.21±0.826  | 4.38E-03 |
| cg00686022 | 12 | 40020078  | C12orf40 | 2.606±0.198  | 2.757±0.328  | 4.39E-03 |
| cg25870263 | 1  | 33335831  | FNDC5    | -0.254±0.178 | -0.096±0.358 | 4.39E-03 |
| cg13149996 | 1  | 21437982  | EIF4G3   | 1.608±0.424  | 1.852±0.438  | 4.39E-03 |
| cg16256504 | 2  | 219724157 | WNT6     | -3.856±0.487 | -3.528±0.675 | 4.40E-03 |
| cg09929564 | 1  | 153643582 | ILF2     | -2.839±0.664 | -3.28±0.888  | 4.43E-03 |
| cg07312445 | 4  | 40752151  | NSUN7    | -4.745±0.514 | -4.411±0.675 | 4.44E-03 |

|            |    |           |            |              |              |          |
|------------|----|-----------|------------|--------------|--------------|----------|
| cg16425577 | 8  | 142139654 | DENND3     | -4.807±1.062 | -4.062±1.565 | 4.46E-03 |
| cg21230392 | 4  | 16077697  | PROM1      | 2.944±0.217  | 2.824±0.216  | 4.47E-03 |
| cg07744166 | 13 | 27131484  | WASF3      | -3.92±0.357  | -3.645±0.598 | 4.47E-03 |
| cg18236297 | 13 | 49280407  | CYSLTR2    | 1.109±0.592  | 0.753±0.688  | 4.48E-03 |
| cg25583174 | 4  | 123748386 | FGF2       | -4.698±0.443 | -4.083±1.479 | 4.48E-03 |
| cg24835159 | 17 | 56494554  | RNF43      | -0.271±0.32  | -0.613±0.8   | 4.48E-03 |
| cg07028869 | 12 | 49741164  | DNAJC22    | -2.123±0.232 | -2.274±0.305 | 4.48E-03 |
| cg16579646 | 1  | 120048352 | HSD3B1     | 1.828±0.241  | 1.65±0.383   | 4.48E-03 |
| cg03970609 | 4  | 71337664  | MUC7       | 1.033±0.352  | 1.262±0.453  | 4.48E-03 |
| cg22635155 | 11 | 72385075  | PDE2A      | -4.019±0.416 | -3.701±0.692 | 4.51E-03 |
| cg16017492 | 17 | 74022575  | EVPL       | 2.029±0.318  | 1.641±0.924  | 4.52E-03 |
| cg26918728 | 3  | 50311335  | SEMA3B     | 2.289±0.345  | 2.055±0.485  | 4.52E-03 |
| cg14133708 | 18 | 2846834   | EMILIN2    | -3.547±0.327 | -3.183±0.857 | 4.52E-03 |
| cg03218374 | 20 | 896981    | ANGPT4     | -2.342±0.263 | -2.019±0.769 | 4.54E-03 |
| cg23149053 | 12 | 132312205 | MMP17      | 0.119±0.609  | 0.566±0.959  | 4.54E-03 |
| cg21428681 | 8  | 23540856  | NKX3-1     | -2.731±0.255 | -2.392±0.814 | 4.55E-03 |
| cg10037005 | 19 | 49838478  | CD37       | 0.107±0.313  | -0.252±0.852 | 4.56E-03 |
| cg23427666 | 8  | 133880105 | TG         | 1.634±0.329  | 1.876±0.52   | 4.57E-03 |
| cg23641145 | 11 | 101000566 | PGR        | -3.566±0.34  | -3.287±0.622 | 4.58E-03 |
| cg01000094 | 11 | 18283327  | 0          | 1.304±0.249  | 1.521±0.491  | 4.59E-03 |
| cg24197445 | 3  | 167045873 | ZBBX       | 2.163±0.363  | 1.86±0.672   | 4.59E-03 |
| cg02624129 | 11 | 130786230 | SNX19      | -2.448±0.391 | -2.703±0.517 | 4.59E-03 |
| cg00298357 | 5  | 148758791 | IL17B      | 2.949±0.326  | 2.769±0.326  | 4.60E-03 |
| cg14747225 | 16 | 103024    | POLR3K     | -3.062±0.576 | -3.415±0.692 | 4.61E-03 |
| cg09486093 | 5  | 118787966 | HSD17B4    | -1.851±0.345 | -2.115±0.577 | 4.61E-03 |
| cg23391785 | 1  | 171810972 | DNM3       | -5.129±0.537 | -4.521±1.437 | 4.61E-03 |
| cg05360220 | 1  | 2488036   | TNFRSF14   | -4.313±0.375 | -4.534±0.422 | 4.62E-03 |
| cg22932215 | 2  | 232651635 | COPS7B     | -3.783±0.528 | -4.093±0.591 | 4.62E-03 |
| cg12995941 | 1  | 156829377 | INSRR      | -1.743±0.298 | -1.477±0.604 | 4.62E-03 |
| cg05585544 | 11 | 47624801  | 0          | 1.749±0.37   | 1.505±0.5    | 4.63E-03 |
| cg06422910 | 7  | 130352926 | COPG2      | -5.247±0.459 | -4.996±0.447 | 4.63E-03 |
| cg09809672 | 1  | 236557682 | EDARADD    | 1.461±0.353  | 1.162±0.673  | 4.65E-03 |
| cg23817637 | 10 | 129691429 | CLRN3      | 1.184±0.272  | 0.972±0.463  | 4.67E-03 |
| cg21959619 | 8  | 145581006 | FBXL6      | -0.581±0.179 | -0.331±0.604 | 4.67E-03 |
| cg14844130 | 22 | 22598937  | VPREB1     | -2.253±0.341 | -2.657±0.964 | 4.69E-03 |
| cg00471562 | 10 | 1102373   | WDR37      | -5.193±0.465 | -4.945±0.434 | 4.70E-03 |
| cg20053158 | 12 | 103351206 | ASCL1      | -3.162±0.488 | -2.796±0.795 | 4.70E-03 |
| cg02008416 | 1  | 55445880  | TMEM61     | 0.694±0.382  | 0.978±0.615  | 4.71E-03 |
| cg17826679 | 19 | 10736038  | SLC44A2    | -0.175±0.373 | 0.129±0.678  | 4.72E-03 |
| cg12939547 | 6  | 31744037  | VWA7       | 2.74±0.441   | 2.326±0.954  | 4.72E-03 |
| cg26527984 | 17 | 73761562  | GALK1      | 0.011±0.198  | -0.18±0.442  | 4.72E-03 |
| cg07935151 | 6  | 31774618  | LSM2       | -3.932±0.457 | -3.683±0.447 | 4.73E-03 |
| cg13802364 | 11 | 63684106  | RCOR2      | -5.526±0.431 | -5.193±0.732 | 4.74E-03 |
| cg07849904 | 22 | 28197796  | MN1        | -3.738±0.263 | -3.536±0.441 | 4.75E-03 |
| cg05596756 | 12 | 47610220  | PCED1B-AS1 | 1.037±0.419  | 0.635±0.93   | 4.76E-03 |
| cg12062492 | 14 | 24423140  | DHRS4      | -1.98±0.367  | -2.228±0.519 | 4.76E-03 |
| cg05960024 | 4  | 56376020  | CLOCK      | 2.532±0.368  | 2.739±0.382  | 4.76E-03 |
| cg12968903 | 4  | 153601789 | TMEM154    | 1.754±0.415  | 1.477±0.576  | 4.77E-03 |
| cg01919208 | 3  | 49170496  | LAMB2      | -1.208±0.443 | -0.909±0.625 | 4.78E-03 |
| cg12839593 | 14 | 61116227  | SIX1       | -4.4±0.515   | -3.98±0.938  | 4.78E-03 |
| cg08872742 | 16 | 66400320  | CDH5       | -0.831±0.197 | -0.571±0.627 | 4.78E-03 |
| cg08999486 | 14 | 103523305 | CDC42BPB   | -5.211±0.589 | -4.827±0.786 | 4.78E-03 |
| cg14851685 | 19 | 15618559  | CYP4F22    | 0.701±0.337  | 1.108±0.975  | 4.78E-03 |
| cg22605063 | 5  | 176899801 | DBN1       | -3.997±0.388 | -4.303±0.678 | 4.79E-03 |
| cg19986872 | 5  | 131347773 | ACSL6      | -4.007±0.528 | -4.315±0.589 | 4.79E-03 |
| cg22605643 | 1  | 163039012 | RGS4       | -1.864±0.497 | -2.341±1.109 | 4.79E-03 |
| cg27032184 | 22 | 46731129  | TRMU       | -0.629±0.305 | -0.259±0.886 | 4.80E-03 |
| cg16370389 | 4  | 37962041  | PTTG2      | 2.366±0.224  | 2.577±0.49   | 4.80E-03 |
| cg03600687 | 2  | 242499012 | BOK-AS1    | -4.55±0.6    | -4.217±0.611 | 4.80E-03 |
| cg10853416 | 11 | 60145275  | MS4A7      | 1.168±0.297  | 1.396±0.501  | 4.83E-03 |
| cg04103317 | 9  | 33240960  | SPINK4     | 1.388±0.305  | 1.601±0.45   | 4.84E-03 |
| cg07676849 | 11 | 71845665  | FOLR3      | 0.279±0.23   | 0.016±0.626  | 4.85E-03 |
| cg00974864 | 1  | 161601053 | FCGR3B     | 1.563±0.336  | 1.784±0.455  | 4.85E-03 |
| cg20017995 | 9  | 136216076 | SNORD24    | 0.794±0.2    | 0.565±0.546  | 4.87E-03 |
| cg27299588 | 19 | 5286082   | PTPRS      | 0.813±0.267  | 0.559±0.59   | 4.90E-03 |
| cg18754342 | 12 | 14849268  | GUCY2C     | 1.685±0.323  | 1.443±0.531  | 4.91E-03 |
| cg11027570 | 3  | 139258431 | RBP1       | -3.659±0.462 | -3.399±0.485 | 4.93E-03 |
| cg14501253 | 8  | 12809014  | KIAA1456   | -4.069±0.506 | -3.765±0.597 | 4.94E-03 |
| cg08088989 | 22 | 22874447  | ZNF280A    | 0.687±0.302  | 0.373±0.741  | 4.96E-03 |
| cg02780295 | 5  | 140855463 | PCDHGC3    | -4.614±0.469 | -4.175±1.017 | 4.96E-03 |

|            |    |           |                   |              |              |          |
|------------|----|-----------|-------------------|--------------|--------------|----------|
| cg09822001 | 1  | 156561334 | <i>APOA1BP</i>    | -4.484±0.527 | -4.796±0.607 | 4.98E-03 |
| cg08578641 | 9  | 34457440  | <i>FAM219A</i>    | -0.714±0.413 | -0.345±0.849 | 4.99E-03 |
| cg10979891 | 14 | 70345898  | <i>SMOC1</i>      | -1.581±0.336 | -1.863±0.638 | 5.00E-03 |
| cg26109803 | 10 | 102222798 | <i>WNT8B</i>      | 1.136±0.293  | 1.321±0.375  | 5.00E-03 |
| cg19133883 | 20 | 1447874   | <i>NSFL1C</i>     | -4.339±0.463 | -4.591±0.456 | 5.01E-03 |
| cg24469977 | 7  | 132333391 | <i>PLXNA4</i>     | 2.247±0.364  | 1.882±0.86   | 5.02E-03 |
| cg18986964 | 9  | 133589320 | <i>ABL1</i>       | -2.758±0.471 | -2.489±0.504 | 5.02E-03 |
| cg09585781 | 17 | 61951136  | <i>CSH2</i>       | 0.136±0.145  | -0.045±0.438 | 5.03E-03 |
| cg01526089 | 17 | 3819390   | <i>P2RX1</i>      | 1.801±0.312  | 2.058±0.583  | 5.04E-03 |
| cg05558390 | 20 | 57415377  | <i>GNAS</i>       | -0.165±0.191 | 0.088±0.614  | 5.05E-03 |
| cg14523284 | 5  | 131993614 | <i>IL13</i>       | 2.769±0.245  | 2.648±0.195  | 5.05E-03 |
| cg02044161 | 3  | 136675705 | <i>IL20RB</i>     | 2.844±0.201  | 2.723±0.24   | 5.07E-03 |
| cg22957381 | 1  | 112532078 | <i>KCND3</i>      | -3.961±0.517 | -3.519±1.008 | 5.08E-03 |
| cg01797043 | 16 | 2004686   | <i>RPL3L</i>      | 0.483±0.153  | 0.68±0.479   | 5.10E-03 |
| cg26823505 | 6  | 35765589  | <i>CLPS</i>       | -0.6±0.271   | -0.945±0.838 | 5.11E-03 |
| cg27248887 | 2  | 207025417 | <i>EEF1B2</i>     | -0.574±0.237 | -0.854±0.673 | 5.14E-03 |
| cg26475085 | 5  | 38845600  | <i>OSMR</i>       | -4.951±0.608 | -4.603±0.663 | 5.14E-03 |
| cg24454579 | 19 | 53794794  | <i>BIRC8</i>      | 1.492±0.339  | 1.198±0.676  | 5.14E-03 |
| cg02959669 | 19 | 58459358  | <i>ZNF256</i>     | -4.508±0.504 | -4.086±0.958 | 5.14E-03 |
| cg15819333 | 16 | 85832091  | <i>EMC8</i>       | -1.208±0.337 | -1.407±0.381 | 5.15E-03 |
| cg07495664 | 1  | 150978905 | <i>FAM63A</i>     | -4.649±0.545 | -4.223±0.95  | 5.15E-03 |
| cg15230273 | 5  | 107006413 | <i>EFNA5</i>      | -3.006±0.303 | -2.802±0.433 | 5.15E-03 |
| cg15305511 | 4  | 5712676   | <i>EVC</i>        | -2.017±0.212 | -2.232±0.51  | 5.17E-03 |
| cg18239753 | 6  | 62995963  | <i>KHDRBS2</i>    | -2.836±0.457 | -2.436±0.918 | 5.18E-03 |
| cg13467814 | 2  | 54013395  | <i>ASB3</i>       | -4.682±0.462 | -4.342±0.742 | 5.18E-03 |
| cg23074453 | 15 | 44487924  | <i>FRMD5</i>      | -3.717±0.387 | -3.927±0.38  | 5.19E-03 |
| cg20858478 | 17 | 47210276  | <i>B4GALNT2</i>   | -4.469±0.476 | -4.1±0.822   | 5.19E-03 |
| cg18253802 | 6  | 135501780 | <i>MYB</i>        | -3.934±0.391 | -4.173±0.48  | 5.19E-03 |
| cg26596161 | 8  | 92261459  | <i>SLC26A7</i>    | -3.248±0.442 | -3.495±0.462 | 5.20E-03 |
| cg21039631 | 1  | 117112854 | <i>CD58</i>       | -3.939±0.492 | -4.198±0.457 | 5.21E-03 |
| cg20951539 | 6  | 36367819  | <i>PXT1</i>       | 1.195±0.277  | 0.885±0.743  | 5.21E-03 |
| cg22672790 | 5  | 161112787 | <i>GABRA6</i>     | -0.684±0.201 | -1.149±1.164 | 5.25E-03 |
| cg01386493 | 8  | 37824529  | <i>ADRB3</i>      | -1.519±0.381 | -1.234±0.629 | 5.25E-03 |
| cg06780358 | 11 | 48003065  | <i>PTPRJ</i>      | -4.974±0.526 | -4.664±0.607 | 5.26E-03 |
| cg19570574 | 15 | 39872824  | <i>THBS1</i>      | -3.952±0.272 | -3.768±0.391 | 5.27E-03 |
| cg22298088 | 20 | 36148860  | <i>NNAT</i>       | 2.067±0.283  | 2.32±0.586   | 5.27E-03 |
| cg05723825 | 2  | 95537475  | <i>TEKT4</i>      | 0.225±0.2    | 0.059±0.379  | 5.27E-03 |
| cg04719766 | 11 | 2542580   | <i>KCNQ1</i>      | 2.514±0.28   | 2.309±0.448  | 5.27E-03 |
| cg12628956 | 5  | 94982685  | <i>RFESD</i>      | -5.197±0.467 | -5.425±0.359 | 5.27E-03 |
| cg09991975 | 22 | 39096760  | <i>JOSD1</i>      | -4.708±0.349 | -4.52±0.341  | 5.28E-03 |
| cg21183846 | 1  | 171283203 | <i>FMO4</i>       | -3.331±0.616 | -3.665±0.602 | 5.30E-03 |
| cg24730207 | 9  | 130891743 | <i>PTGES2-AS1</i> | 4.137±0.304  | 3.935±0.425  | 5.31E-03 |
| cg13017345 | 10 | 111966029 | <i>MXI1</i>       | 1.788±0.253  | 1.44±0.855   | 5.31E-03 |
| cg24585690 | 5  | 135231514 | <i>IL9</i>        | -0.372±0.291 | -0.095±0.649 | 5.31E-03 |
| cg05671350 | 11 | 74022348  | <i>P4HA3</i>      | -1.625±0.353 | -1.291±0.784 | 5.32E-03 |
| cg07947930 | 1  | 203444945 | <i>PRELP</i>      | -0.807±0.334 | -1.15±0.814  | 5.33E-03 |
| cg07241568 | 9  | 136150823 | <i>ABO</i>        | -4.19±0.486  | -3.884±0.629 | 5.34E-03 |
| cg27495908 | 9  | 90498223  | <i>SPATA31E1</i>  | 1.893±0.299  | 1.644±0.568  | 5.36E-03 |
| cg09998591 | 11 | 2891402   | <i>KCNQ1DN</i>    | 1.42±0.244   | 1.166±0.606  | 5.36E-03 |
| cg03109047 | 9  | 140032686 | <i>GRIN1</i>      | -4.022±0.236 | -3.778±0.581 | 5.37E-03 |
| cg10908369 | 2  | 68547256  | <i>CNRIP1</i>     | -4.184±0.509 | -3.762±0.964 | 5.38E-03 |
| cg24854010 | 12 | 1726033   | <i>WNT5B</i>      | 2.277±0.348  | 2.054±0.463  | 5.38E-03 |
| cg00563932 | 9  | 139871049 | <i>PTGDS</i>      | 1.519±0.293  | 1.292±0.506  | 5.38E-03 |
| cg24198678 | 16 | 3703304   | <i>DNASE1</i>     | 2.771±0.36   | 2.974±0.386  | 5.39E-03 |
| cg09736922 | 3  | 184095976 | <i>THPO</i>       | 1.76±0.251   | 1.498±0.626  | 5.39E-03 |
| cg22484793 | 3  | 52261325  | <i>TLR9</i>       | 1.505±0.252  | 1.288±0.499  | 5.40E-03 |
| cg26718585 | 2  | 128176454 | <i>PROC</i>       | 2.035±0.227  | 1.858±0.399  | 5.42E-03 |
| cg22956483 | 11 | 2154432   | <i>IGF2</i>       | -0.57±0.202  | -0.856±0.705 | 5.44E-03 |
| cg24459209 | 11 | 57148215  | <i>PRG3</i>       | 1.167±0.368  | 0.784±0.913  | 5.44E-03 |
| cg17471102 | 19 | 5851255   | <i>FUT3</i>       | -1.196±0.374 | -0.921±0.607 | 5.48E-03 |
| cg23389061 | 14 | 24611157  | <i>EMC9</i>       | -5.105±0.476 | -5.345±0.406 | 5.48E-03 |
| cg16080552 | 1  | 59043199  | <i>TACSTD2</i>    | -0.982±0.416 | -1.346±0.844 | 5.48E-03 |
| cg23065097 | 2  | 24271827  | <i>FKBP1B</i>     | 0.034±0.423  | -0.388±1.002 | 5.48E-03 |
| cg00521434 | 1  | 110081965 | <i>GPR61</i>      | 2.691±0.243  | 2.493±0.452  | 5.50E-03 |
| cg08724563 | 18 | 56940755  | <i>RAX</i>        | -4.496±0.32  | -4.235±0.595 | 5.51E-03 |
| cg04801003 | 2  | 69240754  | <i>ANTXR1</i>     | -4.316±0.371 | -4.04±0.61   | 5.51E-03 |
| cg01963696 | 19 | 851650    | <i>ELANE</i>      | 0.351±0.386  | -0.031±0.905 | 5.51E-03 |
| cg02593766 | 17 | 48608677  | <i>EPN3</i>       | 1.85±0.288   | 1.604±0.569  | 5.51E-03 |
| cg10977115 | 11 | 122709471 | <i>CRTAM</i>      | 1.036±0.352  | 0.777±0.574  | 5.52E-03 |
| cg03608167 | 2  | 136875637 | <i>CXCR4</i>      | -5.761±0.39  | -5.316±1.076 | 5.53E-03 |

|            |    |           |            |              |              |          |
|------------|----|-----------|------------|--------------|--------------|----------|
| cg16284292 | 9  | 129567924 | ZBTB43     | -4.366±0.4   | -4.585±0.409 | 5.55E-03 |
| cg25778479 | 7  | 16686771  | BZW2       | -0.69±0.314  | -1.025±0.806 | 5.57E-03 |
| cg02762689 | 6  | 42163422  | GUCA1B     | 2.088±0.172  | 1.921±0.395  | 5.57E-03 |
| cg18059088 | 4  | 11430353  | HS3ST1     | -4.04±0.468  | -3.719±0.691 | 5.57E-03 |
| cg23657409 | 20 | 8112754   | PLCB1      | -3.936±0.619 | -3.466±1.052 | 5.58E-03 |
| cg13379236 | 4  | 110833808 | EGF        | 0.017±0.164  | -0.243±0.647 | 5.60E-03 |
| cg23926526 | 12 | 68726610  | MDM1       | -4.477±0.484 | -4.769±0.589 | 5.61E-03 |
| cg17838516 | 11 | 92703536  | MTNR1B     | 0.245±0.363  | 0.516±0.602  | 5.61E-03 |
| cg24680924 | 7  | 142552940 | EPHB6      | -5.572±0.436 | -5.07±1.219  | 5.61E-03 |
| cg08009711 | 21 | 43346184  | C2CD2      | -1.186±0.25  | -1.432±0.583 | 5.61E-03 |
| cg21038703 | 17 | 42248358  | ASB16      | 0.672±0.274  | 0.443±0.527  | 5.61E-03 |
| cg00098162 | 10 | 90619573  | 0          | 2.151±0.283  | 1.987±0.322  | 5.63E-03 |
| cg08137716 | 17 | 46871905  | TTL6       | 2.423±0.277  | 2.637±0.481  | 5.63E-03 |
| cg18403396 | 6  | 71666282  | B3GAT2     | -4.384±0.313 | -4.148±0.526 | 5.64E-03 |
| cg06130787 | 19 | 51523550  | KLK10      | -2.34±0.423  | -2.641±0.66  | 5.64E-03 |
| cg08174003 | 19 | 53289933  | ZNF600     | -5.145±0.473 | -4.874±0.525 | 5.67E-03 |
| cg05696092 | 19 | 50084283  | PRRG2      | -0.351±0.437 | -0.706±0.811 | 5.69E-03 |
| cg20171451 | 20 | 23420109  | CSTL1      | 2.785±0.406  | 2.567±0.4    | 5.69E-03 |
| cg18440474 | 2  | 175869653 | CHN1       | -4.903±0.483 | -4.532±0.835 | 5.69E-03 |
| cg17820591 | 17 | 4853706   | ENO3       | -4.281±0.394 | -4.497±0.403 | 5.70E-03 |
| cg01851399 | 12 | 33050217  | PKP2       | -3.823±0.468 | -3.502±0.695 | 5.71E-03 |
| cg03569637 | 12 | 47609357  | PCED1B     | 0.513±0.403  | 0.161±0.82   | 5.71E-03 |
| cg23326301 | 1  | 120439812 | ADAM30     | 2.541±0.214  | 2.379±0.362  | 5.71E-03 |
| cg05209463 | 4  | 2935884   | MFSD10     | -5.571±0.453 | -5.3±0.546   | 5.73E-03 |
| cg26079320 | 1  | 166809407 | POGK       | -3.691±0.319 | -3.856±0.29  | 5.75E-03 |
| cg24412846 | 9  | 127702670 | GOLGA1     | -2.147±0.254 | -1.933±0.494 | 5.76E-03 |
| cg26081812 | 5  | 131880480 | IL5        | 1.669±0.351  | 1.436±0.498  | 5.76E-03 |
| cg09425228 | 2  | 228678005 | CCL20      | 2.006±0.237  | 1.826±0.403  | 5.76E-03 |
| cg25013852 | 1  | 64058941  | PGM1       | -5.138±0.525 | -5.423±0.529 | 5.76E-03 |
| cg12623088 | 15 | 66585521  | DIS3L      | -4.041±0.494 | -4.344±0.618 | 5.77E-03 |
| cg11018904 | 20 | 3762064   | SPEF1      | -3.076±0.545 | -3.406±0.666 | 5.78E-03 |
| cg01517728 | 18 | 67955578  | SOCS6      | -2.861±0.44  | -2.602±0.516 | 5.79E-03 |
| cg16711185 | 15 | 49255875  | SHC4       | -4.515±0.46  | -4.216±0.63  | 5.79E-03 |
| cg21474838 | 12 | 10460612  | KLRD1      | 1.53±0.226   | 1.285±0.588  | 5.80E-03 |
| cg02658214 | 12 | 57327964  | SDR9C7     | 2.007±0.276  | 1.832±0.368  | 5.80E-03 |
| cg01895214 | 2  | 91847866  | LOC654342  | 0.46±0.183   | 0.33±0.287   | 5.81E-03 |
| cg01726775 | 12 | 7261710   | C1RL       | -4.904±0.334 | -5.178±0.63  | 5.83E-03 |
| cg03905144 | 9  | 13249504  | MPDZ       | 1.601±0.268  | 1.39±0.482   | 5.84E-03 |
| cg05104081 | 18 | 8717011   | SOGA2      | 2.931±0.206  | 2.823±0.196  | 5.84E-03 |
| cg00077457 | 1  | 90460000  | GEMIN8P4   | 1.913±0.217  | 1.681±0.559  | 5.86E-03 |
| cg13880228 | 5  | 35230343  | PRLR       | -4.211±0.34  | -3.929±0.652 | 5.87E-03 |
| cg07664183 | 9  | 19103231  | HAUS6      | -2.466±0.578 | -2.872±0.891 | 5.87E-03 |
| cg20781967 | 12 | 772688    | NINJ2      | 0.333±0.299  | 0.053±0.662  | 5.88E-03 |
| cg03396229 | 8  | 139926571 | COL22A1    | -4.209±0.57  | -3.89±0.613  | 5.90E-03 |
| cg14191360 | 7  | 116311773 | MET        | -3.623±0.414 | -3.848±0.422 | 5.91E-03 |
| cg25041439 | 11 | 125753110 | HYLS1      | -0.18±0.235  | 0.087±0.651  | 5.92E-03 |
| cg05094216 | 3  | 151101921 | P2RY12     | -0.658±0.347 | -0.421±0.502 | 5.93E-03 |
| cg06905514 | 7  | 44364941  | CAMK2B     | -4.672±0.746 | -4.016±1.537 | 5.93E-03 |
| cg10240083 | 16 | 12608382  | SNX29      | 2.227±0.211  | 2.089±0.293  | 5.93E-03 |
| cg22429822 | 1  | 52456361  | RAB3B      | -5.341±0.671 | -4.591±1.826 | 5.94E-03 |
| cg13599477 | 10 | 5488485   | NET1       | -3.105±0.522 | -2.774±0.692 | 5.96E-03 |
| cg08027001 | 15 | 45815269  | SLC30A4    | -5.294±0.408 | -5.072±0.419 | 5.96E-03 |
| cg09360654 | 1  | 45806501  | MUTYH      | -2.167±0.273 | -1.792±0.933 | 5.98E-03 |
| cg08670691 | 1  | 3668942   | CCDC27     | 0.686±0.345  | 0.404±0.651  | 5.99E-03 |
| cg10117369 | 1  | 203734256 | LAX1       | -0.17±0.312  | 0.176±0.844  | 5.99E-03 |
| cg11868900 | 8  | 49648035  | EFCAB1     | -3.06±0.578  | -2.58±1.112  | 6.00E-03 |
| cg09837169 | 6  | 155410740 | TIAM2      | 2.963±0.282  | 2.771±0.418  | 6.01E-03 |
| cg20394284 | 9  | 4984206   | JAK2       | -0.392±0.301 | -0.665±0.646 | 6.02E-03 |
| cg14694011 | 15 | 51631024  | CYP19A1    | 2.049±0.251  | 1.879±0.37   | 6.03E-03 |
| cg07572341 | 20 | 22565881  | FOXA2      | -3.066±0.451 | -2.743±0.717 | 6.04E-03 |
| cg16749578 | 19 | 17357619  | NR2F6      | -3.063±0.507 | -2.767±0.59  | 6.07E-03 |
| cg13042288 | 15 | 90349979  | ANPEP      | 2.489±0.25   | 2.141±0.869  | 6.09E-03 |
| cg23574449 | 1  | 23857223  | E2F2       | -4.171±0.282 | -4.318±0.267 | 6.10E-03 |
| cg13074965 | 11 | 66395305  | RBM14-RBM4 | 3.084±0.221  | 2.96±0.239   | 6.10E-03 |
| cg14341418 | 6  | 31624284  | APOM       | 3.366±0.183  | 3.273±0.162  | 6.11E-03 |
| cg27297176 | 2  | 96257861  | TRIM43     | 1.609±0.477  | 1.851±0.419  | 6.12E-03 |
| cg03812679 | 17 | 38170632  | CSF3       | -4.574±0.449 | -4.325±0.479 | 6.14E-03 |
| cg10453365 | 15 | 90039909  | RHCG       | -3.497±0.35  | -3.081±1.024 | 6.14E-03 |
| cg04416752 | 9  | 130679027 | ST6GALNAC4 | -4.768±0.49  | -4.467±0.622 | 6.15E-03 |
| cg06323290 | 10 | 71029879  | HK1        | 1.554±0.254  | 1.745±0.434  | 6.15E-03 |

|            |    |           |                |              |              |          |
|------------|----|-----------|----------------|--------------|--------------|----------|
| cg14264994 | 20 | 56099548  | CTCFL          | 3.319±0.177  | 3.21±0.228   | 6.15E-03 |
| cg20919556 | 6  | 154832050 | CNKSRR3        | -4.454±0.424 | -4.197±0.525 | 6.15E-03 |
| cg22801690 | 12 | 109274241 | DAO            | 1.279±0.373  | 1.042±0.502  | 6.17E-03 |
| cg11492403 | 17 | 41131552  | 'TGES3L-AARSD: | 2.412±0.372  | 2.682±0.604  | 6.19E-03 |
| cg20748065 | 7  | 75583421  |                | 1.682±0.465  | 2.016±0.745  | 6.19E-03 |
| cg12040555 | 10 | 131321830 | MGMT           | 3.203±0.35   | 3.004±0.393  | 6.19E-03 |
| cg12599000 | 9  | 99961508  | 0              | 2.471±0.363  | 2.265±0.401  | 6.20E-03 |
| cg26551843 | 14 | 75390007  | RPS6KL1        | -4.124±0.507 | -4.418±0.589 | 6.21E-03 |
| cg14178895 | 6  | 11778902  | ADTRP          | -0.211±0.276 | 0.098±0.756  | 6.22E-03 |
| cg10779183 | 1  | 22328467  | CELA3A         | 0.493±0.25   | 0.243±0.603  | 6.22E-03 |
| cg03964111 | 7  | 150498493 | TMEM176B       | -0.865±0.47  | -1.25±0.893  | 6.23E-03 |
| cg26822241 | 10 | 96697661  | CYP2C9         | 2.564±0.274  | 2.295±0.647  | 6.24E-03 |
| cg00910168 | 12 | 125474021 | DHX37          | 0.678±0.381  | 0.912±0.482  | 6.24E-03 |
| cg02100848 | 3  | 8693859   | SSUH2          | 1.641±0.294  | 1.439±0.444  | 6.25E-03 |
| cg02320454 | 5  | 94956017  | GPR150         | -4.669±0.354 | -4.163±1.266 | 6.25E-03 |
| cg21770617 | 3  | 58652897  | FAM3D          | 2.236±0.233  | 2.068±0.376  | 6.27E-03 |
| cg25829729 | 13 | 36788667  | SOHLH2         | 2.133±0.269  | 1.876±0.616  | 6.29E-03 |
| cg10135717 | 15 | 100882647 | ADAMTS17       | -0.409±0.302 | -0.663±0.595 | 6.30E-03 |
| cg09500672 | 2  | 150186706 | LYPD6          | -2.699±0.546 | -2.328±0.809 | 6.30E-03 |
| cg03835158 | 8  | 52773607  | PCMTD1         | 3.277±0.297  | 3.462±0.39   | 6.30E-03 |
| cg07265310 | 12 | 53242922  | KRT78          | 0.005±0.143  | 0.215±0.529  | 6.31E-03 |
| cg20655558 | 22 | 41257839  | DNAJB7         | 2.243±0.508  | 2.522±0.532  | 6.32E-03 |
| cg02643667 | 21 | 43786699  | TFF1           | 2.25±0.325   | 1.82±1.07    | 6.32E-03 |
| cg01086978 | 8  | 68255088  | ARFGEF1        | -3.772±0.202 | -3.662±0.208 | 6.33E-03 |
| cg21415080 | 11 | 65768416  | BANF1          | 0.36±0.132   | 0.261±0.224  | 6.35E-03 |
| cg13099330 | 3  | 139257799 | RBP1           | 0.544±0.347  | 0.851±0.726  | 6.35E-03 |
| cg02197293 | 19 | 39523158  | FBXO27         | -2.068±0.392 | -2.338±0.595 | 6.36E-03 |
| cg24030449 | 8  | 16859671  | FGF20          | -2.928±0.333 | -2.676±0.574 | 6.36E-03 |
| cg15234096 | 5  | 96479253  | LIX1           | 1.776±0.508  | 1.5±0.526    | 6.37E-03 |
| cg25546588 | 4  | 142557391 | IL15           | -4.368±0.288 | -4.202±0.333 | 6.39E-03 |
| cg20162599 | 11 | 63990138  | FERMT3         | 2.107±0.271  | 1.839±0.649  | 6.41E-03 |
| cg17505463 | 22 | 18780198  | GGT3P          | 1.972±0.368  | 1.721±0.551  | 6.41E-03 |
| cg24278423 | 19 | 46367240  | FOXA3          | -4.226±0.598 | -4.554±0.63  | 6.42E-03 |
| cg26776924 | 19 | 1969666   | CSNK1G2        | 2.797±0.366  | 2.618±0.302  | 6.43E-03 |
| cg24489237 | 1  | 164529170 | PBX1           | -3.551±0.234 | -3.41±0.292  | 6.44E-03 |
| cg14930706 | 19 | 56363105  | NLRP4          | 2.912±0.166  | 2.737±0.43   | 6.46E-03 |
| cg06601473 | 11 | 33694151  | KIAA1549L      | 2.572±0.373  | 2.296±0.626  | 6.46E-03 |
| cg14972271 | 1  | 223899736 | CAPN2          | -0.941±0.284 | -1.189±0.587 | 6.47E-03 |
| cg24928687 | 1  | 226012913 | EPHX1          | 1.614±0.341  | 1.996±0.943  | 6.49E-03 |
| cg11399100 | 19 | 18722368  | TMEM59L        | -3.266±0.268 | -2.996±0.655 | 6.51E-03 |
| cg13666729 | 1  | 32930473  | ZBTB8B         | -4.705±0.446 | -4.342±0.844 | 6.52E-03 |
| cg19427472 | 13 | 48892948  | RB1            | 2.15±0.199   | 1.889±0.652  | 6.53E-03 |
| cg10910525 | 19 | 49658232  | HRC            | 1.03±0.317   | 0.782±0.572  | 6.53E-03 |
| cg06813842 | 15 | 43910131  | STRC           | 0.502±0.171  | 0.315±0.459  | 6.54E-03 |
| cg01837574 | 17 | 7836610   | CNTROB         | -0.869±0.38  | -1.179±0.723 | 6.54E-03 |
| cg20150565 | 20 | 47893859  | ZFAS1          | -2.806±0.592 | -3.121±0.565 | 6.56E-03 |
| cg13270853 | 12 | 133435649 | CHFR           | 3.065±0.619  | 3.577±1.201  | 6.57E-03 |
| cg16913124 | 3  | 50338253  | HYAL3          | 2.963±0.2    | 3.073±0.215  | 6.57E-03 |
| cg03017653 | 1  | 231115871 | ARV1           | -1.623±0.343 | -1.864±0.539 | 6.57E-03 |
| cg05245515 | 14 | 21467273  | SLC39A2        | -0.439±0.322 | -0.787±0.856 | 6.58E-03 |
| cg01539186 | 20 | 23343673  | GZF1           | -3.368±0.367 | -3.138±0.487 | 6.58E-03 |
| cg08461397 | 16 | 69220726  | SNTB2          | -3.99±0.579  | -4.32±0.66   | 6.58E-03 |
| cg02774963 | 7  | 142659757 | KEL            | 1.897±0.277  | 1.646±0.6    | 6.60E-03 |
| cg07185695 | 1  | 220959586 | 42430          | -3.169±0.398 | -2.771±0.967 | 6.60E-03 |
| cg09395732 | 3  | 10857456  | SLC6A11        | 2.345±0.346  | 2.059±0.671  | 6.60E-03 |
| cg17264470 | 19 | 49260285  | FGF21          | 2.932±0.338  | 2.681±0.57   | 6.61E-03 |
| cg03128832 | 22 | 36112902  | APOL5          | 1.25±0.327   | 0.964±0.68   | 6.62E-03 |
| cg00347729 | 11 | 102651753 | MMP10          | -0.638±0.283 | -0.859±0.508 | 6.63E-03 |
| cg16004226 | 11 | 369875    | B4GALNT4       | -3.191±0.362 | -2.813±0.926 | 6.64E-03 |
| cg04063348 | 6  | 52109347  | IL17F          | 1.737±0.294  | 1.5±0.553    | 6.67E-03 |
| cg16204289 | 2  | 75796759  | EVA1A          | 1.962±0.176  | 1.73±0.582   | 6.71E-03 |
| cg13739417 | 2  | 218990627 | CXCR2          | -0.699±0.292 | -0.341±0.893 | 6.72E-03 |
| cg21076470 | 1  | 174992744 | MRPS14         | -4.599±0.534 | -4.922±0.673 | 6.75E-03 |
| cg25636075 | 3  | 185217761 | TMEM41A        | 3.102±0.3    | 3.278±0.358  | 6.75E-03 |
| cg23240895 | 22 | 45071884  | PRR5           | 1.951±0.176  | 1.698±0.64   | 6.75E-03 |
| cg26850503 | 14 | 59105341  | DACT1          | -5.446±0.539 | -5.042±0.924 | 6.77E-03 |
| cg27553637 | 22 | 37957154  | CDC42EP1       | -4.667±0.453 | -4.403±0.539 | 6.77E-03 |
| cg18361093 | 10 | 135193212 | PAOX           | -3.335±0.396 | -3.609±0.611 | 6.77E-03 |
| cg05501584 | 15 | 92936306  | ST8SIA2        | -2.785±0.325 | -2.43±0.877  | 6.78E-03 |
| cg08020051 | 8  | 145137133 | GPAA1          | -4.402±0.539 | -4.728±0.68  | 6.79E-03 |

|            |    |           |              |              |              |          |
|------------|----|-----------|--------------|--------------|--------------|----------|
| cg21256656 | 19 | 51473823  | KLK6         | 2.036±0.263  | 1.728±0.767  | 6.80E-03 |
| cg11858029 | 1  | 11324407  | 0            | 0.484±0.255  | 0.245±0.576  | 6.80E-03 |
| cg01485797 | 11 | 810820    | SNORA52      | -2.606±0.427 | -2.287±0.732 | 6.83E-03 |
| cg26623286 | 17 | 6555130   | C17orf100    | -5.577±0.443 | -5.808±0.428 | 6.83E-03 |
| cg22555495 | 15 | 25201224  | SNRPN        | 0.3±0.114    | 0.154±0.367  | 6.85E-03 |
| cg00239685 | 3  | 39148342  | TTC21A       | -3.495±0.315 | -3.299±0.416 | 6.85E-03 |
| cg05163588 | 7  | 73498778  | LIMK1        | -3.439±0.291 | -3.598±0.309 | 6.85E-03 |
| cg09622447 | 21 | 44496378  | CBS          | -3.305±0.297 | -3.095±0.47  | 6.85E-03 |
| cg13490635 | 8  | 30242021  | RBPMS        | -4.136±0.329 | -3.918±0.477 | 6.85E-03 |
| cg07588664 | 12 | 42719596  | ZCRB1        | -2.265±0.477 | -2.507±0.436 | 6.86E-03 |
| cg05511685 | 17 | 63184288  | RGS9         | 1.851±0.401  | 1.608±0.507  | 6.87E-03 |
| cg20751395 | 11 | 2594153   | KCNQ1        | 2.749±0.232  | 2.573±0.407  | 6.88E-03 |
| cg09542745 | 10 | 99531164  | SFRP5        | -3.834±0.412 | -3.541±0.662 | 6.91E-03 |
| cg07076342 | 6  | 42981435  | MEA1         | -3.334±0.453 | -3.57±0.437  | 6.92E-03 |
| cg11075556 | 7  | 117865112 | ANKRD7       | 2.16±0.299   | 1.886±0.661  | 6.93E-03 |
| cg27560292 | 11 | 6632884   | TAF10        | -2.177±0.283 | -1.866±0.771 | 6.93E-03 |
| cg22244122 | 9  | 136243698 | C9orf96      | -1.292±0.345 | -1.029±0.607 | 6.94E-03 |
| cg03000846 | 17 | 79990263  | RAC3         | -0.198±0.251 | 0.03±0.549   | 6.94E-03 |
| cg15233681 | 2  | 102770602 | IL1R1        | 1.776±0.281  | 1.978±0.457  | 6.95E-03 |
| cg01371477 | 1  | 150207822 | ANP32E       | -2.308±0.666 | -2.674±0.709 | 6.96E-03 |
| cg00065385 | 9  | 111623395 | ACTL7A       | 3.324±0.351  | 3.117±0.425  | 6.96E-03 |
| cg17328659 | 16 | 729498    | STUB1        | -3.392±0.334 | -2.916±1.208 | 6.97E-03 |
| cg06911113 | 1  | 20512617  | UBXN10       | -4.5±0.568   | -3.615±2.259 | 6.98E-03 |
| cg06433658 | 1  | 150979092 | FAM63A       | -4.109±0.378 | -3.747±0.883 | 7.00E-03 |
| cg11051139 | 12 | 52580428  | KRT80        | 1.722±0.281  | 1.471±0.605  | 7.01E-03 |
| cg23746359 | 1  | 113261764 | FAM19A3      | -0.272±0.208 | -0.488±0.532 | 7.02E-03 |
| cg01078276 | 10 | 75670677  | PLAU         | -4.388±0.368 | -3.937±1.131 | 7.03E-03 |
| cg00557354 | 13 | 111767899 | ARHGEF7      | -3.744±0.559 | -3.314±0.996 | 7.05E-03 |
| cg23580000 | 16 | 50322156  | ADCY7        | 3.539±0.415  | 3.766±0.444  | 7.06E-03 |
| cg04970117 | 3  | 45838037  | SLC6A20      | -4.443±0.505 | -4.184±0.473 | 7.07E-03 |
| cg24642820 | 3  | 13462465  | NUP210       | 0.472±0.254  | 0.776±0.762  | 7.07E-03 |
| cg16721845 | 11 | 68518800  | MTL5         | -4.824±0.564 | -5.133±0.604 | 7.08E-03 |
| cg17480438 | 6  | 138528677 | KIAA1244     | 0.172±0.289  | -0.056±0.526 | 7.09E-03 |
| cg21869055 | 19 | 51522454  | KLK10        | -4.947±0.62  | -4.586±0.739 | 7.09E-03 |
| cg12042678 | 10 | 14920910  | SUV39H2      | -5.812±0.583 | -5.506±0.574 | 7.09E-03 |
| cg24362016 | 19 | 12406154  | ZNF44        | -2.011±0.317 | -1.748±0.626 | 7.11E-03 |
| cg10849854 | 2  | 11674557  | GREB1        | 0.639±0.389  | 0.285±0.849  | 7.11E-03 |
| cg00451635 | 16 | 10675030  | EMP2         | -1.646±0.45  | -1.368±0.59  | 7.11E-03 |
| cg12216205 | 6  | 99863810  | PNISR        | 2.322±0.287  | 2.486±0.33   | 7.13E-03 |
| cg03160637 | 11 | 61101089  | DDB1         | -4.417±0.519 | -4.713±0.598 | 7.13E-03 |
| cg21265783 | 7  | 73704324  | CLIP2        | -4.504±0.259 | -4.217±0.714 | 7.13E-03 |
| cg13461600 | 3  | 183903550 | ABCF3        | -4.503±0.368 | -4.283±0.46  | 7.14E-03 |
| cg01567482 | 5  | 176784318 | RGS14        | 1.751±0.421  | 1.447±0.692  | 7.14E-03 |
| cg12952132 | 19 | 55417647  | NCR1         | -1.06±0.337  | -1.358±0.715 | 7.15E-03 |
| cg12643877 | 17 | 43502145  | ARHGAP27     | 1.355±0.217  | 1.237±0.231  | 7.16E-03 |
| cg03840259 | 22 | 40297036  | GRAP2        | 0.076±0.47   | -0.35±1.023  | 7.16E-03 |
| cg08390209 | 9  | 22005563  | CDKN2B       | 0.173±0.253  | 0.435±0.649  | 7.16E-03 |
| cg10315334 | 17 | 34207332  | CCL5         | 1.142±0.341  | 0.816±0.795  | 7.18E-03 |
| cg10707565 | 10 | 17171695  | CUBN         | 2.267±0.422  | 2.043±0.423  | 7.18E-03 |
| cg26179948 | 7  | 28220645  | JAZF1        | -4.396±0.566 | -4.1±0.557   | 7.19E-03 |
| cg06023257 | 11 | 78129396  | GAB2         | -4.489±0.389 | -4.778±0.665 | 7.19E-03 |
| cg19221369 | 1  | 109618856 | TAF13        | -2.789±0.288 | -3.141±0.884 | 7.20E-03 |
| cg18508125 | 8  | 28347573  | FBXO16       | -2.823±0.349 | -3.029±0.424 | 7.21E-03 |
| cg09102409 | 8  | 134308734 | NDRG1        | -3.74±0.671  | -4.114±0.744 | 7.21E-03 |
| cg14737613 | 19 | 5978790   | LOC100128568 | -3.849±0.359 | -4.05±0.4    | 7.21E-03 |
| cg11012046 | 11 | 134202336 | GLB1L2       | -4.691±0.67  | -4.302±0.797 | 7.22E-03 |
| cg19389852 | 1  | 145439013 | TXNIP        | -3.099±0.61  | -3.449±0.715 | 7.23E-03 |
| cg13574590 | 12 | 4382141   | CCND2        | -4.236±0.543 | -3.896±0.731 | 7.23E-03 |
| cg04796162 | 7  | 45961102  | IGFBP3       | -3.895±0.514 | -3.439±1.098 | 7.23E-03 |
| cg06312477 | 1  | 228003900 | PRSS38       | 2.343±0.176  | 2.188±0.373  | 7.25E-03 |
| cg16449464 | 2  | 172864337 | METAP1D      | -1.457±0.251 | -1.18±0.693  | 7.25E-03 |
| cg15444978 | 14 | 103851370 | MARK3        | -5.353±0.439 | -5.601±0.501 | 7.26E-03 |
| cg10688991 | 17 | 48072565  | DLX3         | -5.253±0.705 | -4.863±0.772 | 7.26E-03 |
| cg05040429 | 8  | 119633844 | SAMD12       | -4.586±0.5   | -4.847±0.49  | 7.30E-03 |
| cg24443925 | 17 | 16118806  | NCOR1        | -3.338±0.544 | -3.068±0.479 | 7.31E-03 |
| cg01620785 | 2  | 27436111  | ATRAID       | -2.071±0.356 | -2.322±0.568 | 7.33E-03 |
| cg05228408 | 1  | 11865352  | CLCN6        | -1.735±0.296 | -1.976±0.573 | 7.36E-03 |
| cg18887228 | 6  | 64356606  | PHF3         | 2.687±0.29   | 2.842±0.297  | 7.36E-03 |
| cg15146720 | 7  | 151722621 | GALNT11      | -3.764±0.34  | -3.568±0.403 | 7.38E-03 |
| cg01155039 | 14 | 103389814 | AMN          | -2.277±0.296 | -1.939±0.846 | 7.38E-03 |

|            |    |           |           |              |              |          |
|------------|----|-----------|-----------|--------------|--------------|----------|
| cg09553358 | 11 | 790184    | CEND1     | -4.002±0.459 | -3.661±0.789 | 7.38E-03 |
| cg19088651 | 17 | 41277213  | BRCA1     | -3.017±0.581 | -3.335±0.609 | 7.39E-03 |
| cg24448259 | 7  | 29186110  | CPVL      | -4.57±0.474  | -4.04±1.325  | 7.39E-03 |
| cg27351998 | 9  | 21304618  | IFNA5     | 2.389±0.421  | 2.131±0.547  | 7.40E-03 |
| cg04366367 | 17 | 80008541  | RFNG      | 4.311±0.305  | 4.487±0.362  | 7.41E-03 |
| cg11835197 | 1  | 36038514  | TFAP2E    | 0.399±0.253  | 0.645±0.604  | 7.42E-03 |
| cg01892689 | 8  | 97657072  | CPQ       | -0.764±0.351 | -1.049±0.676 | 7.43E-03 |
| cg09918674 | 19 | 4638933   | TNFAIP8L1 | -0.247±0.201 | -0.02±0.569  | 7.44E-03 |
| cg20430816 | 4  | 77228354  | STBD1     | -3.41±0.542  | -3.075±0.718 | 7.45E-03 |
| cg11524446 | 1  | 34642184  | C1orf94   | 0.289±0.292  | 0.608±0.799  | 7.46E-03 |
| cg11372831 | 4  | 57303157  | PAICS     | -3.118±0.407 | -3.332±0.409 | 7.46E-03 |
| cg08374799 | 12 | 53601050  | ITGB7     | -1.114±0.416 | -0.812±0.695 | 7.48E-03 |
| cg10503232 | 11 | 2891495   | KCNQ1DN   | 1.854±0.358  | 2.095±0.541  | 7.48E-03 |
| cg02473123 | 17 | 80274776  | CD7       | 2.225±0.314  | 2.013±0.473  | 7.48E-03 |
| cg03875678 | 14 | 25103546  | GZMB      | -0.406±0.25  | -0.715±0.782 | 7.49E-03 |
| cg08453096 | 2  | 44065893  | ABCG5     | 1.879±0.264  | 1.667±0.501  | 7.49E-03 |
| cg24116886 | 20 | 137877    | DEFB127   | 2.86±0.351   | 2.592±0.624  | 7.50E-03 |
| cg00367281 | 8  | 42552470  | CHRNA3    | 1.01±0.2     | 1.218±0.517  | 7.50E-03 |
| cg14027234 | 11 | 66084163  | CD248     | 0.672±0.168  | 0.429±0.623  | 7.50E-03 |
| cg14464791 | 11 | 118661599 | DDX6      | -2.463±0.525 | -2.775±0.658 | 7.52E-03 |
| cg25671438 | 17 | 7240223   | ACAP1     | 0.079±0.36   | -0.246±0.792 | 7.55E-03 |
| cg21750887 | 8  | 68658237  | CPA6      | 1.039±0.215  | 0.747±0.745  | 7.56E-03 |
| cg06134964 | 3  | 52812033  | ITIH1     | 1.212±0.198  | 1.434±0.558  | 7.56E-03 |
| cg00410895 | 1  | 43283884  | CCDC23    | 2.141±0.435  | 2.377±0.464  | 7.58E-03 |
| cg07981910 | 9  | 124461412 | DAB2IP    | -6.436±0.552 | -6.016±0.983 | 7.60E-03 |
| cg16465769 | 6  | 43266151  | SLC22A7   | 1.911±0.161  | 1.668±0.626  | 7.61E-03 |
| cg22657536 | 15 | 74988951  | EDC3      | -4.358±0.604 | -3.973±0.844 | 7.62E-03 |
| cg15384717 | 1  | 150294084 | PRPF3     | -3.328±0.465 | -3.608±0.595 | 7.62E-03 |
| cg02171545 | 15 | 25093366  | SNRPN     | -0.505±0.451 | -0.126±0.912 | 7.62E-03 |
| cg12515638 | 7  | 37956018  | SFRP4     | -3.385±0.491 | -2.955±1.04  | 7.62E-03 |
| cg17468440 | 11 | 111637613 | PPP2R1B   | -3.158±0.436 | -2.875±0.626 | 7.63E-03 |
| cg15464148 | 12 | 6745057   | LPAR5     | 0.69±0.295   | 0.44±0.604   | 7.65E-03 |
| cg11460364 | 2  | 162931397 | DPP4      | -0.156±0.275 | -0.428±0.673 | 7.65E-03 |
| cg06049972 | 3  | 48646375  | UQCRC1    | -3.837±0.402 | -3.619±0.431 | 7.65E-03 |
| cg17497271 | 15 | 40212781  | GPR176    | -3.979±0.499 | -3.557±1.015 | 7.66E-03 |
| cg19836808 | 1  | 153432916 | S100A7    | -2.885±0.349 | -3.174±0.692 | 7.66E-03 |
| cg23352695 | 17 | 29648811  | EVI2A     | 0.281±0.353  | -0.049±0.812 | 7.68E-03 |
| cg02508567 | 2  | 85361184  | TCF7L1    | -4.748±0.683 | -4.376±0.739 | 7.68E-03 |
| cg16501028 | 11 | 32450000  | WT1       | -0.073±0.353 | 0.203±0.652  | 7.70E-03 |
| cg05389183 | 5  | 122372942 | PPIC      | -3.23±0.415  | -2.973±0.556 | 7.72E-03 |
| cg23983884 | 5  | 176900806 | DBN1      | -2.285±0.413 | -2.066±0.423 | 7.74E-03 |
| cg26675077 | 10 | 95398     | TUBB8     | 2.547±0.531  | 2.812±0.481  | 7.75E-03 |
| cg19008649 | 2  | 217560292 | IGFBP5    | -3.274±0.367 | -3.04±0.514  | 7.76E-03 |
| cg26155152 | 19 | 2943999   | ZNF77     | 1.774±0.406  | 1.452±0.763  | 7.78E-03 |
| cg10244047 | 6  | 69346114  | BAI3      | -4.313±0.346 | -3.972±0.847 | 7.78E-03 |
| cg01430430 | 7  | 75914313  | SRRM3     | 1.107±0.28   | 1.399±0.731  | 7.80E-03 |
| cg01214847 | 21 | 43816086  | TMPRSS3   | -0.292±0.371 | -0.605±0.756 | 7.81E-03 |
| cg21167159 | 11 | 2018154   | MIR675    | 2.225±0.321  | 1.925±0.737  | 7.83E-03 |
| cg01036012 | 10 | 95127     | TUBB8     | 2.91±0.781   | 3.28±0.625   | 7.83E-03 |
| cg16940935 | 16 | 20702428  | ACSM1     | 2.879±0.241  | 2.714±0.377  | 7.83E-03 |
| cg03552103 | 2  | 110373002 | SOWAHC    | -0.543±0.448 | -0.825±0.618 | 7.85E-03 |
| cg03891319 | 3  | 52016838  | ACY1      | -4.731±0.304 | -4.565±0.331 | 7.87E-03 |
| cg08307816 | 14 | 100626192 | DEGS2     | -3.996±0.352 | -4.313±0.776 | 7.91E-03 |
| cg23401756 | 16 | 68013981  | DPEP3     | 5.332±0.505  | 4.995±0.755  | 7.91E-03 |
| cg12999109 | 19 | 6333587   | ACER1     | 1.672±0.312  | 1.377±0.726  | 7.91E-03 |
| cg17820459 | 5  | 150400531 | GPX3      | -3.823±0.54  | -3.476±0.767 | 7.94E-03 |
| cg09225321 | 17 | 72920278  | OTOP2     | -3.513±0.283 | -3.241±0.672 | 7.96E-03 |
| cg07334912 | 20 | 18569196  | DTD1      | -4.65±0.455  | -4.4±0.503   | 8.03E-03 |
| cg19216044 | 1  | 155005184 | DCST2     | 3.317±0.331  | 3.491±0.338  | 8.07E-03 |
| cg07347645 | 20 | 58507171  | SYCP2     | 2.8±0.246    | 2.583±0.531  | 8.07E-03 |
| cg21495715 | 17 | 18854560  | SLC5A10   | 0.069±0.292  | 0.423±0.901  | 8.08E-03 |
| cg08077345 | 19 | 49372273  | PLEKHA4   | 1.24±0.327   | 1.447±0.457  | 8.08E-03 |
| cg08934443 | 1  | 149859898 | HIST2H2AB | -3.44±0.591  | -3.763±0.648 | 8.08E-03 |
| cg20492933 | 5  | 154320616 | MRPL22    | -3.138±0.672 | -3.487±0.668 | 8.08E-03 |
| cg06131936 | 11 | 3187271   | OSBPL5    | -0.979±0.19  | -0.738±0.616 | 8.09E-03 |
| cg04744379 | 19 | 51336102  | KLK15     | 1.075±0.262  | 0.748±0.835  | 8.09E-03 |
| cg27508002 | 13 | 37454023  | SMAD9     | 0.934±0.262  | 0.66±0.688   | 8.10E-03 |
| cg25886284 | 19 | 36909418  | ZFP82     | -5.254±0.56  | -4.62±1.608  | 8.13E-03 |
| cg09852871 | 16 | 739598    | WDR24     | 2.349±0.444  | 2.058±0.654  | 8.14E-03 |
| cg15149645 | 16 | 28550619  | NUPR1     | -1.026±0.473 | -0.571±1.132 | 8.14E-03 |

|            |    |           |                   |              |              |          |
|------------|----|-----------|-------------------|--------------|--------------|----------|
| cg23769143 | 3  | 12200667  | <i>TIMP4</i>      | -0.455±0.383 | -0.214±0.533 | 8.16E-03 |
| cg12687990 | 9  | 33677449  | <i>PTENP1</i>     | -4.066±0.328 | -3.658±1.048 | 8.17E-03 |
| cg09022808 | 22 | 30960857  | <i>GAL3ST1</i>    | -0.261±0.27  | 0.05±0.791   | 8.18E-03 |
| cg17356112 | 7  | 132334710 | <i>FLJ40288</i>   | 1.933±0.182  | 1.563±0.973  | 8.19E-03 |
| cg16983211 | 12 | 54427636  | <i>MIR615</i>     | -3.884±0.576 | -3.525±0.79  | 8.25E-03 |
| cg16729794 | 3  | 39509195  | <i>MOBP</i>       | 1.14±0.282   | 0.943±0.451  | 8.25E-03 |
| cg07790638 | 4  | 113508575 | <i>C4orf21</i>    | 2.316±0.359  | 2.507±0.372  | 8.26E-03 |
| cg07409200 | 13 | 43354674  | <i>FAM216B</i>    | 0.38±0.267   | 0.056±0.829  | 8.27E-03 |
| cg21033855 | 15 | 43662581  | <i>ZSCAN29</i>    | -3±0.444     | -2.718±0.626 | 8.27E-03 |
| cg16001913 | 10 | 71029644  | <i>HK1</i>        | 1.625±0.29   | 1.439±0.417  | 8.29E-03 |
| cg12766348 | 5  | 178054039 | <i>CLK4</i>       | -5.364±0.548 | -5.081±0.544 | 8.29E-03 |
| cg09582042 | 13 | 95253676  | <i>GPR180</i>     | -1.482±0.366 | -1.105±0.949 | 8.32E-03 |
| cg15447479 | 7  | 128828765 | <i>SMO</i>        | -4.438±0.474 | -3.933±1.277 | 8.38E-03 |
| cg22954818 | 22 | 39354115  | <i>APOBEC3A</i>   | 1.141±0.266  | 1.344±0.483  | 8.39E-03 |
| cg00044245 | 6  | 94128889  | <i>EPHA7</i>      | -3.543±0.398 | -3.283±0.587 | 8.42E-03 |
| cg12249575 | 14 | 36988805  | <i>NKX2-1</i>     | -3.947±0.399 | -3.653±0.69  | 8.44E-03 |
| cg11469778 | 2  | 131674201 | <i>ARHGEF4</i>    | -0.586±0.317 | -0.19±1.02   | 8.45E-03 |
| cg13439730 | 16 | 31146999  | <i>PRSS8</i>      | 0.205±0.317  | -0.071±0.678 | 8.49E-03 |
| cg15553522 | 11 | 60692329  | <i>TMEM132A</i>   | -4.483±0.438 | -4.155±0.778 | 8.52E-03 |
| cg08954856 | 22 | 43506306  | <i>BIK</i>        | -3.257±0.508 | -2.98±0.558  | 8.53E-03 |
| cg25225238 | 7  | 86272973  | <i>GRM3</i>       | -3.555±0.336 | -3.201±0.899 | 8.53E-03 |
| cg22971191 | 13 | 103719706 | <i>SLC10A2</i>    | 0.452±0.275  | 0.103±0.901  | 8.54E-03 |
| cg15972294 | 3  | 50273096  | <i>GNAI2</i>      | -3.906±0.41  | -4.122±0.424 | 8.55E-03 |
| cg03086563 | 1  | 149857152 | <i>HIST2H2BE</i>  | -4.14±0.551  | -4.436±0.592 | 8.55E-03 |
| cg17479357 | 7  | 43769596  | <i>COA1</i>       | -3.121±0.459 | -3.373±0.511 | 8.55E-03 |
| cg20288630 | 4  | 120550423 | <i>PDE5A</i>      | -4.978±0.439 | -4.75±0.443  | 8.55E-03 |
| cg14865516 | 5  | 43557751  | <i>PAIP1</i>      | -4.263±0.487 | -4.523±0.517 | 8.57E-03 |
| cg04956382 | 5  | 137203640 | <i>MYOT</i>       | -0.478±0.246 | -0.232±0.618 | 8.57E-03 |
| cg19831369 | 22 | 26881026  | <i>SRRD</i>       | 0.695±0.197  | 0.412±0.738  | 8.60E-03 |
| cg24297976 | 2  | 20189487  | <i>WDR35</i>      | -4.252±0.33  | -4.459±0.459 | 8.61E-03 |
| cg25457027 | 2  | 128175179 | <i>PROC</i>       | 3.657±0.287  | 3.495±0.336  | 8.61E-03 |
| cg02275294 | 1  | 179262462 | <i>SOAT1</i>      | -4.022±0.529 | -3.747±0.535 | 8.61E-03 |
| cg15659828 | 11 | 911673    | <i>CHID1</i>      | -4.296±0.478 | -3.995±0.669 | 8.63E-03 |
| cg19434303 | 14 | 100843067 | <i>WDR25</i>      | -4.227±0.423 | -4.42±0.313  | 8.64E-03 |
| cg06615861 | 1  | 10271191  | <i>KIF1B</i>      | -5.109±0.436 | -4.881±0.448 | 8.64E-03 |
| cg03329572 | 1  | 157523253 | <i>FCRL5</i>      | 2.567±0.205  | 2.254±0.819  | 8.65E-03 |
| cg18943195 | 2  | 73339228  | <i>RAB11FIP5</i>  | -3.358±0.669 | -3.018±0.646 | 8.65E-03 |
| cg27039606 | 19 | 36305049  | <i>PRODH2</i>     | 2.066±0.191  | 1.76±0.803   | 8.66E-03 |
| cg21391660 | 17 | 73522123  | <i>LLGL2</i>      | -4.967±0.429 | -5.186±0.42  | 8.68E-03 |
| cg15802323 | 7  | 127228142 | <i>ARF5</i>       | -3.331±0.323 | -3.1±0.54    | 8.71E-03 |
| cg07175007 | 1  | 162467185 | <i>UHMK1</i>      | 1.582±0.562  | 1.899±0.66   | 8.71E-03 |
| cg19317638 | 19 | 45542562  | <i>CLASRP</i>     | -2.191±0.546 | -1.895±0.599 | 8.73E-03 |
| cg01168201 | 17 | 1958412   | <i>HIC1</i>       | -5.283±0.547 | -4.979±0.629 | 8.75E-03 |
| cg12188560 | 9  | 34591192  | <i>CTFR</i>       | -2.144±0.381 | -2.459±0.77  | 8.77E-03 |
| cg03366896 | 10 | 135186866 | <i>ENHS1</i>      | -6.076±0.506 | -5.818±0.493 | 8.77E-03 |
| cg14462830 | 6  | 123959184 | <i>TRDN</i>       | 0.977±0.304  | 0.67±0.775   | 8.77E-03 |
| cg16625901 | 5  | 94013530  | <i>ANKRD32</i>    | 1.567±0.379  | 1.768±0.352  | 8.80E-03 |
| cg02992647 | 17 | 36004446  | <i>DDX52</i>      | 1.852±0.212  | 2.116±0.682  | 8.80E-03 |
| cg10046620 | 6  | 27775042  | <i>HIST1H2AI</i>  | -3.365±0.333 | -2.749±1.63  | 8.82E-03 |
| cg21325760 | 15 | 23891402  | <i>MAGEL2</i>     | 3.511±0.334  | 3.305±0.456  | 8.82E-03 |
| cg15572745 | 14 | 78870232  | <i>NRXN3</i>      | 0.222±0.312  | 0.563±0.872  | 8.83E-03 |
| cg10618882 | 19 | 18509358  | <i>LRRC25</i>     | 1.763±0.203  | 1.899±0.311  | 8.83E-03 |
| cg05347567 | 12 | 56512408  | <i>ZC3H10</i>     | -3.343±0.555 | -3.603±0.447 | 8.85E-03 |
| cg23322523 | 8  | 67039041  | <i>TRIM55</i>     | 0.104±0.345  | 0.418±0.782  | 8.85E-03 |
| cg05164185 | 11 | 69456412  | <i>CCND1</i>      | -3.595±0.643 | -3.943±0.705 | 8.85E-03 |
| cg01342792 | 1  | 212797322 | <i>FAM71A</i>     | 1.302±0.241  | 1.047±0.649  | 8.88E-03 |
| cg26369667 | 11 | 101981789 | <i>YAP1</i>       | -5.823±0.843 | -5.378±0.885 | 8.90E-03 |
| cg10822172 | 7  | 28338757  | <i>CREB5</i>      | -1.167±0.378 | -0.881±0.685 | 8.90E-03 |
| cg18913171 | 1  | 159925416 | <i>SLAMF9</i>     | 2.172±0.398  | 2.386±0.432  | 8.91E-03 |
| cg23282559 | 13 | 33591130  | <i>KL</i>         | -3.573±0.378 | -3.247±0.807 | 8.92E-03 |
| cg06765514 | 9  | 130689862 | <i>PIP5KL1</i>    | -3.809±0.497 | -4.071±0.519 | 8.92E-03 |
| cg00587613 | 11 | 67220223  | <i>GPR152</i>     | 1.45±0.264   | 1.111±0.88   | 8.96E-03 |
| cg06000781 | 4  | 15703606  | <i>BST1</i>       | 2.506±0.234  | 2.264±0.614  | 8.97E-03 |
| cg02719634 | 11 | 2924899   | <i>SLC22A18AS</i> | 2.136±0.4    | 1.747±0.983  | 9.01E-03 |
| cg24482234 | 19 | 19006439  | <i>GDF1</i>       | -3.868±0.346 | -3.616±0.598 | 9.02E-03 |
| cg24743283 | 7  | 2884365   | <i>GNAI2</i>      | -4.611±0.463 | -4.87±0.541  | 9.04E-03 |
| cg22396129 | 12 | 42721145  | <i>PPHLN1</i>     | 0.571±0.334  | 0.282±0.717  | 9.04E-03 |
| cg24239808 | 3  | 15641908  | <i>HACL1</i>      | 1.814±0.229  | 2.025±0.527  | 9.04E-03 |
| cg06242000 | 3  | 183966155 | <i>ALG3</i>       | -3.687±0.425 | -3.929±0.512 | 9.11E-03 |
| cg05325699 | 17 | 39890756  | <i>HAP1</i>       | -4.204±0.422 | -3.952±0.552 | 9.12E-03 |

|            |    |           |            |              |              |          |
|------------|----|-----------|------------|--------------|--------------|----------|
| cg25683185 | 12 | 6756088   | ACRBP      | 0.927±0.376  | 0.562±0.922  | 9.13E-03 |
| cg15822346 | 6  | 111408761 | SLC16A10   | -3.074±0.355 | -3.313±0.552 | 9.15E-03 |
| cg09754413 | 6  | 13925567  | RNF182     | -3.2±0.236   | -2.903±0.775 | 9.16E-03 |
| cg26535072 | 9  | 72288156  | APBA1      | -4.121±0.403 | -3.928±0.348 | 9.19E-03 |
| cg14717946 | 1  | 205090841 | RBBP5      | -2.515±0.429 | -2.735±0.43  | 9.19E-03 |
| cg19240938 | 11 | 2942036   | SLC22A18   | 2.985±0.326  | 2.8±0.391    | 9.22E-03 |
| cg18511007 | 7  | 94023822  | COL1A2     | -3.364±0.706 | -2.888±1.102 | 9.22E-03 |
| cg24768561 | 2  | 236401800 | AGAP1      | 0.397±0.208  | 0.64±0.628   | 9.22E-03 |
| cg04748704 | 7  | 136553243 | CHRM2      | -3.202±0.448 | -2.872±0.78  | 9.23E-03 |
| cg02261346 | 22 | 43898597  | MPPED1     | 2.699±0.486  | 2.326±0.902  | 9.26E-03 |
| cg24748786 | 4  | 72203501  | SLC4A4     | -0.378±0.232 | -0.156±0.563 | 9.26E-03 |
| cg21589115 | 19 | 49867114  | DKKL1      | -3.111±0.557 | -2.753±0.815 | 9.30E-03 |
| cg07435592 | 3  | 98619796  | DCBLD2     | -3.151±0.436 | -2.909±0.506 | 9.31E-03 |
| cg07559730 | 19 | 53497048  | ZNF702P    | -4.226±0.472 | -3.858±0.895 | 9.34E-03 |
| cg04633384 | 18 | 13218816  | LDLRAD4    | -4.181±0.54  | -3.844±0.758 | 9.35E-03 |
| cg06518271 | 4  | 100140325 | ADH6       | 1.419±0.224  | 1.088±0.873  | 9.35E-03 |
| cg08920071 | 1  | 117544781 | CD101      | 1.021±0.45   | 1.257±0.468  | 9.35E-03 |
| cg03776060 | 9  | 133972575 | AIF1L      | -2.574±0.426 | -2.282±0.682 | 9.36E-03 |
| cg21788470 | 12 | 28125673  | PTHLH      | 0.585±0.357  | 0.865±0.68   | 9.37E-03 |
| cg15741583 | 11 | 6461908   | HPX        | 0.159±0.359  | 0.346±0.373  | 9.37E-03 |
| cg05965188 | 21 | 45078342  | HSF2BP     | 1.566±0.281  | 1.729±0.349  | 9.40E-03 |
| cg12387247 | 19 | 7766974   | FCER2      | -0.131±0.268 | 0.12±0.633   | 9.41E-03 |
| cg05885720 | 12 | 13348429  | EMP1       | 1.649±0.347  | 1.851±0.438  | 9.41E-03 |
| cg10771262 | 6  | 134209980 | TCF21      | -1.3±0.292   | -0.935±0.953 | 9.49E-03 |
| cg04720358 | 17 | 9808263   | RCVRN      | 5.267±0.416  | 4.971±0.701  | 9.49E-03 |
| cg02301754 | 1  | 151149370 | TMOD4      | 2.497±0.269  | 2.65±0.328   | 9.52E-03 |
| cg27460755 | 2  | 154800287 | GALNT13    | 1.493±0.252  | 1.331±0.369  | 9.53E-03 |
| cg01708236 | 6  | 44233446  | NFKBIE     | -3.808±0.47  | -4.038±0.429 | 9.53E-03 |
| cg12010995 | 8  | 59413152  | CYP7A1     | 0.511±0.338  | 0.224±0.705  | 9.53E-03 |
| cg06602857 | 16 | 86542807  | FENDRR     | -4.784±0.37  | -4.334±1.171 | 9.54E-03 |
| cg06625767 | 5  | 176836695 | F12        | 2.077±0.295  | 2.279±0.473  | 9.56E-03 |
| cg10115873 | 22 | 41258407  | DNAJB7     | 2.143±0.278  | 2.292±0.304  | 9.57E-03 |
| cg16991589 | 13 | 25670047  | PABPC3     | -0.234±0.504 | 0.108±0.797  | 9.57E-03 |
| cg05150177 | 1  | 155829110 | SYT11      | -3.772±0.71  | -4.14±0.729  | 9.57E-03 |
| cg18881269 | 12 | 6936267   | LEPREL2    | 1.964±0.233  | 1.688±0.719  | 9.58E-03 |
| cg17500962 | 16 | 73178951  | C1orf47    | 1.224±0.235  | 0.998±0.572  | 9.58E-03 |
| cg00833393 | 9  | 35731638  | CREB3      | -5.031±0.497 | -4.804±0.385 | 9.59E-03 |
| cg23602533 | 8  | 63998164  | TTPA       | -3.845±0.493 | -3.545±0.668 | 9.63E-03 |
| cg11510839 | 15 | 28344488  | OCA2       | -5.259±0.557 | -4.913±0.777 | 9.66E-03 |
| cg22609784 | 4  | 4863678   | MSX1       | -0.322±0.303 | 0.006±0.848  | 9.69E-03 |
| cg06481786 | 17 | 34257936  | RDM1       | -2.806±0.404 | -3.047±0.531 | 9.71E-03 |
| cg20925955 | 6  | 155412182 | TIAM2      | 2.724±0.372  | 3.126±1.038  | 9.71E-03 |
| cg23989635 | 16 | 68771203  | CDH1       | -3.075±0.444 | -2.796±0.633 | 9.71E-03 |
| cg19713196 | 1  | 201368390 | LAD1       | -2.6±0.305   | -2.844±0.598 | 9.73E-03 |
| cg00431050 | 10 | 103985730 | ELOVL3     | -0.421±0.224 | -0.176±0.634 | 9.74E-03 |
| cg21522303 | 17 | 74581331  | ST6GALNAC2 | -5.213±0.509 | -4.931±0.596 | 9.74E-03 |
| cg02192520 | 12 | 56114155  | RDH5       | 0.169±0.322  | 0.529±0.932  | 9.75E-03 |
| cg20953047 | 1  | 207120022 | PIGR       | 2.792±0.206  | 3.002±0.539  | 9.75E-03 |
| cg16753209 | 2  | 152590992 | NEB        | 0.937±0.27   | 1.133±0.47   | 9.76E-03 |
| cg09037813 | 2  | 238599761 | LRRFIP1    | 1.061±0.325  | 0.718±0.883  | 9.80E-03 |
| cg03395546 | 19 | 41222599  | ADCK4      | -1.349±0.371 | -1.558±0.448 | 9.80E-03 |
| cg17977409 | 9  | 17579227  | SH3GL2     | -3.127±0.637 | -2.657±1.135 | 9.82E-03 |
| cg11403598 | 16 | 69374664  | COG8       | 0.573±0.254  | 0.387±0.444  | 9.84E-03 |
| cg20633959 | 7  | 129250987 | NRF1       | -4.489±0.302 | -4.285±0.476 | 9.85E-03 |
| cg18790143 | 2  | 241080464 | OTOS       | 0.651±0.247  | 0.346±0.8    | 9.88E-03 |
| cg13702536 | 12 | 123215553 | HCAR1      | -0.147±0.329 | -0.487±0.878 | 9.88E-03 |
| cg07728874 | 11 | 118213272 | CD3D       | 2.095±0.307  | 1.856±0.587  | 9.88E-03 |
| cg21034676 | 5  | 135364552 | TGFBI      | -3.72±0.79   | -3.304±0.843 | 9.90E-03 |
| cg14217157 | 4  | 2011877   | NELFA      | -2.739±0.404 | -2.962±0.468 | 9.92E-03 |
| cg20879768 | 18 | 44562136  | TCEB3B     | 2.262±0.397  | 2.058±0.405  | 9.93E-03 |
| cg01769037 | 6  | 15246613  | JARID2     | -3.253±0.661 | -3.607±0.726 | 9.93E-03 |
| cg07850604 | 14 | 36003443  | INSM2      | -3.806±0.3   | -3.241±1.518 | 9.94E-03 |
| cg03644378 | 17 | 7761459   | LSMD1      | -5.334±0.537 | -4.984±0.808 | 9.95E-03 |
| cg25799986 | 20 | 44098281  | WFDC2      | -1.84±0.278  | -2.053±0.519 | 9.96E-03 |
| cg05352668 | 1  | 11023756  | C1orf127   | 1.58±0.281   | 1.793±0.518  | 9.97E-03 |
| cg20732137 | 20 | 62251227  | GMEB2      | 1.625±0.251  | 1.838±0.53   | 9.97E-03 |
| cg20163288 | 17 | 42908052  | GJC1       | -4.141±0.438 | -3.82±0.774  | 1.00E-02 |

<sup>a</sup>Probe IDs for the Infinium HumanMethylation27 BeadChip (Illumina). <sup>b</sup>National Center for Biotechnology Information (NCBI) Database (Genome Build 37).

Supplementary Table 5B. The 599 probes showing significant differences in DNA methylation levels between adjacent normal lung tissue (N) samples and tumorous tissue (T) samples from patients belonging to the the ALK fusion group.

| Probe ID <sup>a</sup> | Chromosome | Position <sup>b</sup> | Gene symbol      | M-values (mean±SD) |              | FDR, q   |
|-----------------------|------------|-----------------------|------------------|--------------------|--------------|----------|
|                       |            |                       |                  | N                  | T            |          |
| cg07778029            | 7          | 27205114              | <i>HOXA9</i>     | -3.598±0.414       | -0.315±0.359 | 1.78E-05 |
| cg13699808            | 20         | 45985339              | <i>ZMYND8</i>    | -0.819±0.271       | -2.933±0.209 | 1.81E-05 |
| cg12003230            | 21         | 44899139              | <i>LINC00313</i> | 0.638±0.148        | 2.284±0.2    | 1.81E-05 |
| cg10238818            | 21         | 27945554              | <i>CYYR1</i>     | -3.798±0.458       | -0.304±0.426 | 1.86E-05 |
| cg03958979            | 6          | 108486387             | <i>NR2E1</i>     | -1.922±0.314       | 0.769±0.356  | 2.08E-05 |
| cg06760035            | 17         | 46655245              | <i>HOXB4</i>     | -4.695±0.523       | 0.168±0.587  | 2.24E-05 |
| cg23095584            | 2          | 237077704             | <i>GBX2</i>      | -2.718±0.232       | -0.421±0.268 | 2.95E-05 |
| cg07221454            | 11         | 60552841              | <i>MS4A10</i>    | 2.607±0.137        | 3.873±0.181  | 3.65E-05 |
| cg24199834            | 4          | 147560126             | <i>POU4F2</i>    | -3.283±0.474       | 0.071±0.323  | 3.85E-05 |
| cg03177025            | 2          | 28112917              | <i>RBKS</i>      | -1.425±0.231       | -3.088±0.238 | 4.19E-05 |
| cg24441911            | 12         | 7280988               | <i>RBP5</i>      | 1.42±0.235         | 2.941±0.19   | 6.01E-05 |
| cg12508624            | 11         | 119293780             | <i>THY1</i>      | -4.121±0.367       | -1.751±0.256 | 6.38E-05 |
| cg01261503            | 17         | 62493599              | <i>POLG2</i>     | -1.546±0.099       | -3.066±0.199 | 6.55E-05 |
| cg26069745            | 7          | 27142200              | <i>HOXA2</i>     | -2.419±0.268       | 0.056±0.397  | 6.85E-05 |
| cg10549973            | 14         | 58863097              | <i>TOMM20L</i>   | -1.47±0.321        | -3.671±0.356 | 7.00E-05 |
| cg24898753            | 11         | 61735917              | <i>FTH1</i>      | -0.728±0.323       | -3.449±0.441 | 7.25E-05 |
| cg26555310            | 1          | 68914717              | <i>RPE65</i>     | 1.308±0.261        | 2.998±0.264  | 7.40E-05 |
| cg08097882            | 13         | 79177516              | <i>POU4F1</i>    | -4.077±0.362       | -0.108±0.601 | 7.61E-05 |
| cg00187686            | 11         | 59634218              | <i>TCN1</i>      | 0.866±0.269        | -1.043±0.322 | 7.63E-05 |
| cg01280080            | 2          | 216177276             | <i>ATIC</i>      | -1.204±0.234       | -3.413±0.359 | 7.86E-05 |
| cg26728422            | 16         | 1429015               | <i>UNKL</i>      | -1.149±0.366       | -3.621±0.392 | 8.00E-05 |
| cg03975694            | 19         | 38042472              | <i>ZNF540</i>    | -2.446±0.351       | 0.323±0.465  | 8.08E-05 |
| cg01580681            | 4          | 174450016             | <i>HAND2</i>     | -2.233±0.332       | 0.057±0.394  | 8.91E-05 |
| cg25964007            | 17         | 9479910               | <i>WDR16</i>     | -1.598±0.423       | -4.384±0.474 | 9.09E-05 |
| cg18267374            | 8          | 24771273              | <i>NEFM</i>      | -3.738±0.517       | -0.491±0.552 | 9.78E-05 |
| cg24407065            | 1          | 169335802             | <i>NME7</i>      | 1.296±0.116        | 2.832±0.232  | 1.00E-04 |
| cg23303408            | 5          | 145718597             | <i>POU4F3</i>    | -3.406±0.486       | -0.75±0.386  | 1.16E-04 |
| cg00433406            | 1          | 20616975              | <i>VWA5B1</i>    | 1.323±0.289        | 3.009±0.291  | 1.16E-04 |
| cg26388152            | 17         | 27944453              | <i>CORO6</i>     | -1.484±0.519       | -4.404±0.347 | 1.17E-04 |
| cg04228042            | 12         | 14996527              | <i>ART4</i>      | 0.434±0.14         | 2.38±0.298   | 1.18E-04 |
| cg09619146            | 10         | 125651034             | <i>CPXM2</i>     | -1.549±0.316       | 0.371±0.336  | 1.18E-04 |
| cg25882366            | 17         | 46622037              | <i>HOXB-AS1</i>  | -1.321±0.179       | 0.036±0.245  | 1.19E-04 |
| cg21115990            | 11         | 68079081              | <i>LRP5</i>      | 0.587±0.15         | 2.031±0.246  | 1.19E-04 |
| cg10604646            | 1          | 163172649             | <i>RGS5</i>      | -0.068±0.278       | 1.435±0.226  | 1.20E-04 |
| cg18043280            | 17         | 40996886              | <i>AOC2</i>      | 2.1±0.271          | 3.701±0.284  | 1.20E-04 |
| cg04802221            | 16         | 67223955              | <i>EXOC3L1</i>   | 0.415±0.141        | 1.763±0.235  | 1.21E-04 |
| cg25942450            | 5          | 170736251             | <i>TLX3</i>      | -2.913±0.535       | 0.056±0.433  | 1.21E-04 |
| cg06627364            | 2          | 87755088              | <i>LINC00152</i> | -2.649±0.369       | -4.617±0.308 | 1.34E-04 |
| cg04081402            | 22         | 31003587              | <i>TCN2</i>      | 1.078±0.183        | 2.777±0.304  | 1.37E-04 |
| cg07403255            | 2          | 114036170             | <i>PAX8</i>      | 0.256±0.125        | 1.307±0.192  | 1.37E-04 |
| cg26066361            | 12         | 10282621              | <i>CLEC7A</i>    | 1.081±0.337        | -0.715±0.232 | 1.44E-04 |
| cg04534765            | 18         | 74962369              | <i>GALR1</i>     | -3.727±0.708       | -0.079±0.594 | 1.74E-04 |
| cg02994956            | 22         | 29876534              | <i>NEFH</i>      | -1.213±0.364       | 0.689±0.321  | 1.76E-04 |
| cg25720804            | 5          | 170736389             | <i>TLX3</i>      | -3.367±0.715       | 0.664±0.385  | 1.76E-04 |
| cg06850526            | 17         | 79269886              | <i>SLC38A10</i>  | 0.361±0.308        | -1.239±0.283 | 1.99E-04 |
| cg02332525            | 3          | 6903153               | <i>GRM7</i>      | -1.873±0.37        | 0.115±0.211  | 2.04E-04 |
| cg22134325            | 11         | 66188745              | <i>NPAS4</i>     | -1.415±0.24        | 0.498±0.371  | 2.04E-04 |
| cg21460081            | 17         | 46656012              | <i>HOXB4</i>     | -3.868±0.338       | -1.036±0.546 | 2.07E-04 |
| cg18554440            | 11         | 17741687              | <i>MYOD1</i>     | -2.822±0.335       | -0.345±0.494 | 2.20E-04 |
| cg19979773            | 1          | 27702651              | <i>FCN3</i>      | 1.723±0.204        | 2.975±0.252  | 2.21E-04 |
| cg06958537            | 21         | 40176950              | <i>ETS2</i>      | -1.525±0.319       | -3.384±0.375 | 2.29E-04 |
| cg05064181            | 10         | 116445398             | <i>ABLIM1</i>    | 0.187±0.221        | 2.216±0.39   | 2.43E-04 |
| cg06766367            | 16         | 67062687              | <i>CBFB</i>      | -1.932±0.157       | -3.759±0.33  | 2.64E-04 |
| cg04106190            | 7          | 120964168             | <i>WNT16</i>     | 0.294±0.218        | 1.365±0.196  | 2.73E-04 |
| cg17950095            | 7          | 27224700              | <i>HOXA11</i>    | -1.457±0.289       | 0.277±0.362  | 2.75E-04 |
| cg27169020            | 15         | 83954229              | <i>BNC1</i>      | -1.687±0.249       | -0.109±0.329 | 2.76E-04 |
| cg12432709            | 18         | 52627333              | <i>CCDC68</i>    | 0.018±0.221        | 1.204±0.241  | 2.80E-04 |
| cg24670715            | 8          | 6420506               | <i>ANGPT2</i>    | -0.151±0.335       | 1.441±0.247  | 2.88E-04 |
| cg07123069            | 12         | 54367250              | <i>HOXC11</i>    | -3.017±0.368       | -0.495±0.53  | 2.98E-04 |
| cg25511807            | 11         | 102401438             | <i>MMP7</i>      | -0.243±0.243       | -1.813±0.334 | 3.02E-04 |
| cg12111714            | 13         | 26043472              | <i>ATP8A2</i>    | -2.068±0.306       | 0.478±0.517  | 3.03E-04 |
| cg04784672            | 14         | 42077674              | <i>LRFN5</i>     | -3.784±0.597       | -0.589±0.662 | 3.05E-04 |
| cg26060255            | 20         | 3025968               | <i>MRPS26</i>    | -0.791±0.236       | -2.151±0.289 | 3.06E-04 |
| cg21296230            | 15         | 33010536              | <i>GREM1</i>     | -3.499±0.503       | -0.162±0.713 | 3.18E-04 |
| cg24309555            | 2          | 21266956              | <i>APOB</i>      | 0.201±0.19         | -0.899±0.238 | 3.42E-04 |
| cg09325711            | 7          | 39662764              | <i>RALA</i>      | -2.436±0.402       | -4.574±0.456 | 3.52E-04 |
| cg17376813            | 19         | 750024                | <i>MISP</i>      | 1.353±0.121        | 2.328±0.204  | 3.60E-04 |
| cg02257405            | 5          | 131346985             | <i>ACSL6</i>     | -1.481±0.14        | -0.515±0.209 | 3.65E-04 |
| cg26894575            | 1          | 153518054             | <i>S100A4</i>    | -1.738±0.14        | -3.485±0.326 | 3.71E-04 |
| cg23640701            | 12         | 52301634              | <i>ACVRL1</i>    | 0.388±0.257        | 1.998±0.355  | 3.78E-04 |
| cg08089301            | 17         | 46655561              | <i>HOXB4</i>     | -3.822±0.873       | 0.25±0.792   | 3.79E-04 |
| cg01656853            | 19         | 49199172              | <i>FUT2</i>      | -0.24±0.14         | -1.514±0.263 | 3.80E-04 |
| cg05350879            | 4          | 88451223              | <i>SPARCL1</i>   | 0.354±0.265        | 1.963±0.357  | 3.82E-04 |

|            |    |           |                  |              |              |          |
|------------|----|-----------|------------------|--------------|--------------|----------|
| cg03623878 | 13 | 113655560 | <i>MCF2L</i>     | -2.401±0.43  | -4.355±0.364 | 3.86E-04 |
| cg05062178 | 3  | 124605247 | <i>ITGB5</i>     | -1.791±0.358 | -3.459±0.332 | 3.91E-04 |
| cg02189785 | 9  | 139891008 | <i>CLIC3</i>     | -1.237±0.154 | -3.67±0.433  | 3.92E-04 |
| cg05109049 | 17 | 29641333  | <i>EVI2B</i>     | 0.321±0.448  | -2.211±0.567 | 3.93E-04 |
| cg05261299 | 12 | 52437299  | <i>NR4A1</i>     | 1.698±0.28   | 3.29±0.353   | 3.94E-04 |
| cg13153865 | 8  | 90914101  | <i>OSGIN2</i>    | -2.971±0.232 | -4.428±0.325 | 3.94E-04 |
| cg08900043 | 12 | 54378896  | <i>HOXC10</i>    | -2.378±0.471 | -0.239±0.413 | 3.95E-04 |
| cg00292971 | 7  | 143060536 | <i>FAM131B</i>   | 0.186±0.237  | 1.482±0.286  | 3.96E-04 |
| cg22660578 | 17 | 35294029  | <i>LHX1</i>      | -2.901±0.74  | 0.396±0.531  | 3.96E-04 |
| cg12782180 | 7  | 127880932 | <i>LEP</i>       | -0.729±0.431 | 1.228±0.27   | 3.97E-04 |
| cg09643544 | 19 | 9473696   | <i>ZNF177</i>    | -2.5±0.227   | 0.13±0.51    | 3.97E-04 |
| cg22289837 | 8  | 86350278  | <i>CA3</i>       | -1.38±0.199  | -0.358±0.227 | 4.04E-04 |
| cg04837071 | 9  | 140318649 | <i>NOXA1</i>     | 0.583±0.187  | -0.925±0.328 | 4.19E-04 |
| cg10106388 | 1  | 160832662 | <i>CD244</i>     | -1.658±0.438 | -3.66±0.411  | 4.22E-04 |
| cg26626042 | 6  | 32151594  | <i>AGER</i>      | 1.178±0.208  | 2.35±0.266   | 4.22E-04 |
| cg13870866 | 7  | 35293130  | <i>TBX20</i>     | -2.707±0.264 | 0.028±0.555  | 4.22E-04 |
| cg25993718 | 20 | 54580196  | <i>CBLN4</i>     | -2.684±0.436 | -0.475±0.496 | 4.32E-04 |
| cg06572160 | 19 | 50831901  | <i>KCNC3</i>     | -3.377±0.543 | -0.717±0.587 | 4.32E-04 |
| cg16521028 | 12 | 75874414  | <i>GLIPR1</i>    | -0.813±0.229 | -3.05±0.466  | 4.37E-04 |
| cg09614401 | 20 | 4229009   | <i>ADRA1D</i>    | 2.229±0.274  | 3.419±0.205  | 4.38E-04 |
| cg22506453 | 17 | 39122753  | <i>KRT39</i>     | 1.138±0.203  | 2.061±0.192  | 4.39E-04 |
| cg16313343 | 14 | 105768109 | <i>BRF1</i>      | -1.59±0.405  | -3.367±0.272 | 4.40E-04 |
| cg23673107 | 19 | 11908712  | <i>ZNF491</i>    | -1.297±0.341 | 0.183±0.243  | 4.42E-04 |
| cg17518825 | 2  | 46523461  | <i>EPAS1</i>     | -0.777±0.305 | 0.678±0.321  | 4.43E-04 |
| cg23067535 | 8  | 124195133 | <i>FAM83A</i>    | 2.077±0.131  | -0.08±0.393  | 4.44E-04 |
| cg13323752 | 12 | 8025567   | <i>SLC2A14</i>   | -4.541±0.423 | -1.007±0.772 | 4.45E-04 |
| cg09784259 | 1  | 169703422 | <i>SELE</i>      | 0.924±0.167  | 2.059±0.26   | 4.45E-04 |
| cg06692050 | 10 | 99532398  | <i>SFRP5</i>     | 2.44±0.317   | 3.807±0.236  | 4.47E-04 |
| cg23801057 | 12 | 121569969 | <i>P2RX7</i>     | 0.62±0.119   | 1.811±0.248  | 4.47E-04 |
| cg02245378 | 2  | 223161771 | <i>CCDC140</i>   | -2.796±0.213 | -0.259±0.507 | 4.53E-04 |
| cg13634319 | 12 | 56323727  | <i>DGKA</i>      | 0.458±0.286  | -0.768±0.2   | 4.58E-04 |
| cg06409153 | 17 | 67323953  | <i>ABCA5</i>     | -1.588±0.271 | -2.797±0.255 | 4.67E-04 |
| cg17166338 | 5  | 1295969   | <i>TERT</i>      | 0.49±0.173   | 2.057±0.339  | 4.70E-04 |
| cg15191648 | 18 | 76740262  | <i>SALL3</i>     | -2.819±0.647 | 0.007±0.396  | 4.74E-04 |
| cg20812929 | 14 | 24458345  | <i>DHRS4L2</i>   | -1.076±0.297 | -2.786±0.403 | 4.82E-04 |
| cg22918700 | 14 | 24600067  | <i>FITM1</i>     | 1.081±0.219  | 2.07±0.218   | 4.98E-04 |
| cg21279601 | 4  | 9782931   | <i>DRD5</i>      | -1.461±0.225 | 0.389±0.414  | 4.99E-04 |
| cg01798589 | 3  | 36421572  | <i>STAC</i>      | -1.533±0.248 | -2.802±0.302 | 5.49E-04 |
| cg20881888 | 3  | 50383079  | <i>ZMYND10</i>   | -0.089±0.493 | -2.72±0.63   | 5.52E-04 |
| cg02442161 | 20 | 43803637  | <i>PI3</i>       | 1.858±0.302  | 0.147±0.41   | 5.52E-04 |
| cg24505341 | 3  | 62861544  | <i>CADPS</i>     | -1.62±0.274  | -0.421±0.266 | 5.76E-04 |
| cg02422694 | 17 | 46655790  | <i>HOXB4</i>     | -3.812±0.284 | -1.134±0.589 | 5.77E-04 |
| cg27409364 | 11 | 17757743  | <i>KCNC1</i>     | -1.035±0.436 | 0.78±0.353   | 5.78E-04 |
| cg09357097 | 17 | 46688490  | <i>HOXB7</i>     | -3.221±0.085 | -1.115±0.367 | 5.79E-04 |
| cg01770232 | 7  | 22766155  | <i>IL6</i>       | -1.07±0.412  | -2.771±0.335 | 6.17E-04 |
| cg10114327 | 4  | 122301573 | <i>QRFRP</i>     | -1.163±0.31  | 0.147±0.288  | 6.75E-04 |
| cg00687674 | 15 | 69373260  | <i>LINC00277</i> | 0.134±0.322  | -1.199±0.285 | 7.12E-04 |
| cg08596000 | 11 | 104035204 | <i>PDGFD</i>     | -2.122±0.238 | -3.595±0.363 | 7.16E-04 |
| cg18533225 | 22 | 50986813  | <i>KLHDC7B</i>   | -0.039±0.115 | 1.5±0.317    | 7.17E-04 |
| cg19885761 | 5  | 175223646 | <i>CPLX2</i>     | -2.816±0.467 | 0.203±0.74   | 7.20E-04 |
| cg03283569 | 9  | 127963181 | <i>RABEPK</i>    | -2.506±0.261 | -3.555±0.193 | 7.21E-04 |
| cg23447996 | 9  | 93564603  | <i>SYK</i>       | -1.224±0.191 | -2.356±0.281 | 7.22E-04 |
| cg22680204 | 4  | 5895098   | <i>CRMP1</i>     | -3.197±0.534 | -0.882±0.541 | 7.30E-04 |
| cg27188703 | 12 | 50297581  | <i>FAIM2</i>     | -2.002±0.312 | 0.449±0.583  | 7.38E-04 |
| cg08961832 | 11 | 279185    | <i>NLRP6</i>     | -0.881±0.123 | 0.253±0.259  | 7.40E-04 |
| cg27214774 | 20 | 49253710  | <i>FAM65C</i>    | 0.31±0.282   | 2.001±0.421  | 7.42E-04 |
| cg14196790 | 5  | 131705035 | <i>SLC22A5</i>   | -2.232±0.286 | -3.376±0.2   | 7.45E-04 |
| cg01581111 | 9  | 125028327 | <i>RBM18</i>     | 1.524±0.124  | 2.42±0.218   | 7.53E-04 |
| cg02510853 | 16 | 3031707   | <i>PKMYT1</i>    | -0.803±0.363 | 0.918±0.427  | 7.54E-04 |
| cg04420907 | 17 | 9480215   | <i>WDR16</i>     | -2.81±0.399  | -4.951±0.54  | 7.56E-04 |
| cg24056567 | 8  | 18871909  | <i>PSD3</i>      | -1.428±0.188 | -2.375±0.238 | 7.57E-04 |
| cg14826456 | 10 | 115804095 | <i>ADRB1</i>     | -1.731±0.478 | 0.24±0.44    | 7.58E-04 |
| cg03630088 | 10 | 125651526 | <i>CPXM2</i>     | -2.045±0.198 | -0.327±0.4   | 7.58E-04 |
| cg13262687 | 4  | 147559579 | <i>POU4F2</i>    | -3.287±0.267 | -0.661±0.597 | 7.79E-04 |
| cg20158248 | 16 | 16042956  | <i>ABCC1</i>     | -2.991±0.321 | -4.261±0.26  | 7.91E-04 |
| cg15748507 | 10 | 120354627 | <i>PRLHR</i>     | -1.346±0.392 | 0.501±0.463  | 7.92E-04 |
| cg03199651 | 4  | 4862770   | <i>MSX1</i>      | -3.891±0.427 | -1.908±0.497 | 8.16E-04 |
| cg07186138 | 22 | 39410396  | <i>APOBEC3C</i>  | -2.616±0.462 | -4.434±0.377 | 8.33E-04 |
| cg20291049 | 2  | 105472217 | <i>POU3F3</i>    | -2.281±0.563 | 0.333±0.659  | 8.38E-04 |
| cg16652259 | 2  | 172949501 | <i>DLX1</i>      | -2.617±0.362 | -0.057±0.641 | 8.64E-04 |
| cg25044651 | 5  | 115298720 | <i>AQPEP</i>     | -2.431±0.72  | 0.355±0.518  | 8.65E-04 |
| cg26491484 | 9  | 133885058 | <i>LAMC3</i>     | 1.855±0.151  | 2.474±0.145  | 8.67E-04 |
| cg00548268 | 7  | 98245830  | <i>NPTX2</i>     | -1.237±0.269 | 0.631±0.469  | 8.69E-04 |
| cg01351032 | 16 | 10971191  | <i>CIITA</i>     | 0.346±0.192  | -1.541±0.436 | 8.70E-04 |
| cg23713742 | 20 | 34202721  | <i>SPAG4</i>     | 1.53±0.32    | 0.073±0.369  | 8.71E-04 |
| cg05755779 | 8  | 120079625 | <i>COLEC10</i>   | 0.896±0.142  | 2.44±0.35    | 8.71E-04 |
| cg10481740 | 4  | 1857103   | <i>LETM1</i>     | -3.074±0.207 | -4.272±0.309 | 8.72E-04 |

|            |    |           |                 |              |              |          |
|------------|----|-----------|-----------------|--------------|--------------|----------|
| cg01242619 | 8  | 145049472 | <i>PLEC</i>     | -1.667±0.353 | -3.063±0.306 | 8.73E-04 |
| cg11921829 | 1  | 157746930 | <i>FCRL2</i>    | 1.01±0.296   | -0.9±0.486   | 8.73E-04 |
| cg21272774 | 12 | 54393725  | <i>HOXC9</i>    | -3.709±0.39  | -1.45±0.581  | 8.74E-04 |
| cg14166009 | 19 | 37825309  | <i>HKR1</i>     | -1.384±0.325 | 0.263±0.425  | 8.74E-04 |
| cg11054936 | 13 | 20766170  | <i>GJB2</i>     | -0.971±0.098 | -1.816±0.203 | 8.88E-04 |
| cg13354523 | 12 | 10251574  | <i>CLEC1A</i>   | -0.103±0.244 | 1.757±0.461  | 8.94E-04 |
| cg16708981 | 19 | 53758609  | <i>ZNF677</i>   | -2.504±0.404 | -0.053±0.634 | 9.05E-04 |
| cg25176823 | 7  | 5632593   | <i>FSCN1</i>    | -3.538±0.486 | -1.251±0.594 | 9.28E-04 |
| cg06194808 | 7  | 1596217   | <i>TMEM184A</i> | 1.744±0.325  | -0.265±0.521 | 9.39E-04 |
| cg27442349 | 19 | 39389219  | <i>NFKB1B</i>   | 1.059±0.278  | 2.123±0.222  | 9.42E-04 |
| cg21053529 | 15 | 35046760  | <i>GJD2</i>     | -2.327±0.342 | -0.385±0.509 | 9.42E-04 |
| cg12354377 | 10 | 62149557  | <i>ANK3</i>     | 1.301±0.265  | 2.807±0.396  | 9.62E-04 |
| cg07703401 | 16 | 230341    | <i>HBQ1</i>     | -4.239±0.551 | -0.647±0.928 | 9.63E-04 |
| cg19712821 | 4  | 15965016  | <i>FGFBP2</i>   | -0.61±0.235  | -2.133±0.394 | 9.63E-04 |
| cg18107827 | 1  | 26488988  | <i>FAM110D</i>  | -1.314±0.336 | -2.689±0.342 | 1.04E-03 |
| cg09873258 | 14 | 101192894 | <i>DLK1</i>     | -1.035±0.574 | 1.122±0.452  | 1.07E-03 |
| cg07195577 | 17 | 27052828  | <i>TLCD1</i>    | -1.698±0.44  | -4.152±0.656 | 1.08E-03 |
| cg15484375 | 11 | 18287647  | <i>SAA1</i>     | -0.059±0.196 | -1.356±0.339 | 1.09E-03 |
| cg06377278 | 1  | 25256369  | <i>RUNX3</i>    | -5.18±0.623  | -0.563±1.185 | 1.09E-03 |
| cg22187630 | 19 | 13616871  | <i>CACNA1A</i>  | -3.275±0.244 | -0.908±0.571 | 1.10E-03 |
| cg17449882 | 8  | 67406020  | <i>C8orf46</i>  | 1.786±0.18   | 2.909±0.298  | 1.10E-03 |
| cg18401406 | 13 | 37247537  | <i>SERTM1</i>   | 0.756±0.243  | 1.857±0.292  | 1.10E-03 |
| cg01882150 | 11 | 63933998  | <i>MACROD1</i>  | -3.237±0.312 | -4.457±0.164 | 1.10E-03 |
| cg09656934 | 1  | 179561500 | <i>TDRD5</i>    | -1.008±0.358 | 0.528±0.401  | 1.10E-03 |
| cg05836145 | 7  | 20827117  | <i>SP8</i>      | -0.487±0.177 | 0.297±0.208  | 1.12E-03 |
| cg14709481 | 5  | 176325836 | <i>HK3</i>      | 1.915±0.2    | 0.648±0.336  | 1.12E-03 |
| cg11935147 | 1  | 145075831 | <i>PDE4DIP</i>  | -2.193±0.453 | -0.196±0.53  | 1.12E-03 |
| cg18883209 | 22 | 44394601  | <i>PARVB</i>    | 0.481±0.153  | 1.636±0.297  | 1.13E-03 |
| cg15913671 | 17 | 79304420  | <i>TMEM105</i>  | 0.606±0.214  | -0.744±0.359 | 1.13E-03 |
| cg03270167 | 2  | 238768916 | <i>RAMP1</i>    | -2.422±0.339 | -4.036±0.437 | 1.14E-03 |
| cg24921858 | 12 | 12223989  | <i>BCL2L14</i>  | -0.136±0.272 | -1.49±0.368  | 1.14E-03 |
| cg04396791 | 11 | 70508180  | <i>SHANK2</i>   | -1.071±0.176 | 0.322±0.356  | 1.16E-03 |
| cg24169822 | 7  | 27170994  | <i>HOXA4</i>    | -1.246±0.182 | 0.468±0.421  | 1.17E-03 |
| cg08583049 | 15 | 60296815  | <i>FOXB1</i>    | -5.214±0.384 | -2.576±0.696 | 1.18E-03 |
| cg15387123 | 9  | 139891058 | <i>CLIC3</i>    | -0.525±0.191 | -3.056±0.577 | 1.18E-03 |
| cg24929834 | 22 | 29457241  | <i>C22orf31</i> | 0.373±0.273  | 1.713±0.367  | 1.19E-03 |
| cg03355526 | 5  | 178368415 | <i>ZNF454</i>   | -1.803±0.466 | 0.242±0.55   | 1.19E-03 |
| cg10078415 | 16 | 20775011  | <i>ACSM3</i>    | -1.605±0.237 | -3.171±0.418 | 1.21E-03 |
| cg19910382 | 2  | 88427561  | <i>FABP1</i>    | 1.641±0.198  | 2.867±0.331  | 1.21E-03 |
| cg23509869 | 6  | 31553441  | <i>LST1</i>     | -0.417±0.143 | -1.7±0.322   | 1.21E-03 |
| cg12953249 | 9  | 126118772 | <i>CRB2</i>     | 2.13±0.39    | 3.544±0.298  | 1.26E-03 |
| cg09871315 | 7  | 27142682  | <i>HOXA2</i>    | -2.904±0.301 | 0.367±0.788  | 1.26E-03 |
| cg26608332 | 22 | 20861476  | <i>MED15</i>    | 0.721±0.371  | 2.117±0.341  | 1.29E-03 |
| cg20692569 | 7  | 72848481  | <i>FZD9</i>     | -0.725±0.283 | 0.603±0.368  | 1.31E-03 |
| cg26521404 | 7  | 27204981  | <i>HOXA9</i>    | -2.814±0.573 | 0.452±0.904  | 1.34E-03 |
| cg02250594 | 18 | 55103353  | <i>ONECUT2</i>  | -2.745±0.512 | -0.087±0.742 | 1.34E-03 |
| cg18940763 | 22 | 29197846  | <i>XBP1</i>     | -0.085±0.509 | -2.017±0.484 | 1.35E-03 |
| cg16142218 | 8  | 23101221  | <i>CHMP7</i>    | 0.095±0.221  | -1.586±0.444 | 1.35E-03 |
| cg05521696 | 12 | 8025495   | <i>SLC2A14</i>  | -2.983±0.433 | -0.276±0.741 | 1.35E-03 |
| cg00466249 | 17 | 79269884  | <i>SLC38A10</i> | 0.123±0.172  | -1.114±0.33  | 1.35E-03 |
| cg23557926 | 1  | 196620963 | <i>CFH</i>      | -2.367±0.3   | -3.652±0.352 | 1.35E-03 |
| cg10983208 | 10 | 73848320  | <i>SPOCK2</i>   | -2.807±0.41  | -4.449±0.437 | 1.36E-03 |
| cg06531741 | 11 | 113775450 | <i>HTR3B</i>    | 0.52±0.299   | 2.308±0.494  | 1.36E-03 |
| cg27009703 | 7  | 27204894  | <i>HOXA9</i>    | -1.086±0.401 | 0.55±0.441   | 1.37E-03 |
| cg21663122 | 6  | 26250936  | <i>HIST1H3F</i> | -4.216±0.544 | -1.41±0.788  | 1.37E-03 |
| cg11546621 | 9  | 139872161 | <i>PTGDS</i>    | 0.57±0.179   | 1.516±0.266  | 1.37E-03 |
| cg27541541 | 6  | 22298146  | <i>PRL</i>      | 0.063±0.249  | 1.304±0.349  | 1.38E-03 |
| cg21995126 | 3  | 165555262 | <i>BCHE</i>     | -0.942±0.383 | 0.688±0.449  | 1.39E-03 |
| cg04481779 | 6  | 137366125 | <i>IL20RA</i>   | -1.254±0.237 | -2.346±0.307 | 1.39E-03 |
| cg00234616 | 2  | 74740572  | <i>TLX2</i>     | -1.978±0.306 | -0.641±0.372 | 1.39E-03 |
| cg16832407 | 9  | 73736539  | <i>TRPM3</i>    | -2.429±0.171 | -0.426±0.485 | 1.40E-03 |
| cg16924616 | 7  | 96653617  | <i>DLX5</i>     | -4.22±0.909  | -0.975±0.733 | 1.40E-03 |
| cg17385448 | 1  | 15911702  | <i>AGMAT</i>    | -0.524±0.144 | -1.514±0.269 | 1.41E-03 |
| cg26282384 | 5  | 140767200 | <i>PCDHGB4</i>  | -3.83±0.422  | -1.554±0.642 | 1.41E-03 |
| cg06005396 | 19 | 590541    | <i>HCN2</i>     | -4.195±0.464 | -1.377±0.786 | 1.41E-03 |
| cg14333454 | 1  | 27189298  | <i>SFN</i>      | 0.127±0.389  | -1.404±0.411 | 1.41E-03 |
| cg14287742 | 1  | 169335773 | <i>NME7</i>     | 1.235±0.222  | 3.151±0.499  | 1.42E-03 |
| cg18236477 | 13 | 26043066  | <i>ATP8A2</i>   | -2.612±0.409 | -0.12±0.694  | 1.42E-03 |
| cg15227610 | 11 | 111782016 | <i>CRYAB</i>    | 0.493±0.278  | 1.629±0.311  | 1.42E-03 |
| cg00911351 | 5  | 140767255 | <i>PCDHGB4</i>  | -2.917±0.315 | -0.572±0.631 | 1.43E-03 |
| cg09786257 | 5  | 95768695  | <i>PCSK1</i>    | -1.437±0.22  | 0.335±0.47   | 1.45E-03 |
| cg23290344 | 8  | 24771466  | <i>NEFM</i>     | -3.65±0.809  | -0.259±0.948 | 1.48E-03 |
| cg25645462 | 16 | 57653702  | <i>GPR56</i>    | 1.961±0.146  | 0.337±0.403  | 1.50E-03 |
| cg02681442 | 14 | 29236008  | <i>FOXG1</i>    | -3.575±0.385 | -0.825±0.752 | 1.50E-03 |
| cg11108890 | 2  | 85811471  | <i>VAMP5</i>    | -0.801±0.387 | 0.572±0.325  | 1.53E-03 |
| cg06088032 | 3  | 50383227  | <i>ZMYND10</i>  | -1.097±0.679 | -3.479±0.425 | 1.53E-03 |
| cg21458907 | 3  | 62860802  | <i>CADPS</i>    | -4.429±0.718 | -1.791±0.678 | 1.54E-03 |

|            |    |           |          |              |              |          |
|------------|----|-----------|----------|--------------|--------------|----------|
| cg19368582 | 10 | 88716646  | MMRN2    | -0.015±0.117 | 1.309±0.329  | 1.54E-03 |
| cg27316956 | 6  | 152958899 | SYNE1    | 0.019±0.371  | -1.455±0.406 | 1.54E-03 |
| cg25691167 | 7  | 19184961  | FERD3L   | -4.358±0.827 | -0.638±1.067 | 1.54E-03 |
| cg13531460 | 2  | 231790813 | GPR55    | 1.625±0.173  | 0.45±0.327   | 1.56E-03 |
| cg04595372 | 6  | 49681233  | CRISP2   | 0.111±0.254  | 1.268±0.334  | 1.58E-03 |
| cg13301014 | 19 | 38754768  | SPINT2   | -2.197±0.221 | -4.112±0.507 | 1.58E-03 |
| cg03775422 | 7  | 54610192  | VSTM2A   | -4.037±0.371 | -1.219±0.768 | 1.58E-03 |
| cg19064258 | 16 | 22826117  | HS3ST2   | -3.07±0.43   | -0.299±0.779 | 1.59E-03 |
| cg00767581 | 2  | 177015125 | MIR10B   | -1.875±0.336 | -0.126±0.507 | 1.61E-03 |
| cg07059052 | 16 | 2828302   | TCEB2    | -2.28±0.451  | -4.047±0.495 | 1.72E-03 |
| cg18705067 | 7  | 75914998  | SRRM3    | 3.657±0.342  | 5.514±0.541  | 1.73E-03 |
| cg03907174 | 19 | 50030461  | RCN3     | 2.151±0.266  | 3.058±0.187  | 1.74E-03 |
| cg06092815 | 2  | 229046406 | SPHKAP   | -1.891±0.301 | -0.353±0.45  | 1.74E-03 |
| cg17398613 | 21 | 43919853  | SLC37A1  | 1.753±0.45   | 3.362±0.416  | 1.77E-03 |
| cg15128898 | 5  | 35618029  | SPEF2    | -1.651±0.669 | -4.027±0.341 | 1.78E-03 |
| cg19574488 | 3  | 61236547  | FHIT     | -2.343±0.272 | -3.437±0.313 | 1.79E-03 |
| cg06821993 | 8  | 114449011 | CSMD3    | -3.374±0.383 | -1.193±0.637 | 1.81E-03 |
| cg23432345 | 7  | 27196153  | HOXA7    | -3.834±0.496 | -0.327±0.988 | 1.81E-03 |
| cg09936561 | 4  | 9783623   | DRD5     | -2.45±0.378  | -0.349±0.615 | 1.81E-03 |
| cg12006284 | 11 | 32449638  | WT1      | -2.12±0.306  | 0.016±0.604  | 1.83E-03 |
| cg06537230 | 7  | 96653183  | DLX5     | -1.965±0.122 | -0.523±0.366 | 1.83E-03 |
| cg12907644 | 11 | 18270341  | SAA2     | 0.289±0.232  | -0.996±0.378 | 1.83E-03 |
| cg18601426 | 7  | 158381220 | PTPRN2   | -1.687±0.184 | -0.687±0.294 | 1.84E-03 |
| cg07211259 | 9  | 5510497   | PDCD1LG2 | -2.657±0.385 | -4.022±0.357 | 1.84E-03 |
| cg24101578 | 20 | 44880263  | CDH22    | -1.919±0.412 | -0.183±0.51  | 1.86E-03 |
| cg06493994 | 6  | 25652602  | SCGN     | -3.406±0.522 | -1.201±0.649 | 1.86E-03 |
| cg27138018 | 1  | 156589303 | HAPLN2   | -1.929±0.328 | -3.092±0.306 | 1.87E-03 |
| cg11450827 | 22 | 19513006  | CLDN5    | 0.176±0.148  | 1.991±0.46   | 1.87E-03 |
| cg05023540 | 14 | 96116970  | TCL6     | 1.504±0.073  | 0.946±0.156  | 1.87E-03 |
| cg19466563 | 4  | 88450506  | SPARCL1  | -1.162±0.26  | 0.93±0.578   | 1.88E-03 |
| cg02008154 | 7  | 35293537  | TBX20    | -3.682±0.48  | -0.263±0.977 | 1.99E-03 |
| cg13784855 | 8  | 128806938 | MIR1204  | -3.767±0.27  | -4.929±0.347 | 2.00E-03 |
| cg02164046 | 3  | 187388148 | SST      | -3.392±0.431 | -0.15±0.917  | 2.00E-03 |
| cg01459453 | 1  | 169599212 | SELP     | 0.615±0.242  | 1.854±0.372  | 2.02E-03 |
| cg01354473 | 7  | 27204803  | HOXA9    | -2.535±0.439 | 0.329±0.836  | 2.09E-03 |
| cg04304130 | 6  | 11111894  | ERVFRD-1 | 0.96±0.232   | 1.954±0.299  | 2.11E-03 |
| cg27041096 | 8  | 120079173 | COLEC10  | 0.327±0.211  | 1.696±0.403  | 2.17E-03 |
| cg15781838 | 2  | 128422717 | LIMS2    | 1.342±0.145  | 2.629±0.356  | 2.17E-03 |
| cg08942800 | 6  | 49681310  | CRISP2   | -0.161±0.469 | 1.433±0.411  | 2.18E-03 |
| cg21504624 | 9  | 34653580  | IL11RA   | -1.519±0.2   | -0.429±0.328 | 2.19E-03 |
| cg21815667 | 2  | 176993841 | HOXD8    | -3.435±0.224 | -1.096±0.627 | 2.19E-03 |
| cg18741908 | 3  | 169756818 | GPR160   | -0.869±0.249 | -2.475±0.474 | 2.19E-03 |
| cg26637069 | 11 | 57004294  | APLN9    | 0.764±0.088  | 1.834±0.279  | 2.21E-03 |
| cg00221494 | 13 | 98794593  | FARP1    | -1.349±0.323 | -3.615±0.661 | 2.27E-03 |
| cg10186456 | 16 | 2892912   | PRSS30P  | 0.128±0.186  | 1.833±0.473  | 2.30E-03 |
| cg12014417 | 12 | 123187920 | HCAR2    | 0.115±0.269  | -1.462±0.475 | 2.31E-03 |
| cg07572435 | 8  | 143868013 | LY6D     | 1.745±0.198  | 0.661±0.331  | 2.36E-03 |
| cg14967066 | 11 | 314341    | IFITM1   | -1.451±0.328 | -3.05±0.492  | 2.37E-03 |
| cg14183455 | 1  | 31196733  | MATN1    | 1.783±0.252  | 2.603±0.192  | 2.42E-03 |
| cg16196812 | 10 | 120355139 | PRLHR    | -1.411±0.254 | -0.233±0.364 | 2.43E-03 |
| cg00882451 | 16 | 21222863  | ZP2      | 2.137±0.168  | 2.968±0.257  | 2.45E-03 |
| cg09112782 | 13 | 115047484 | UPF3A    | -3.119±0.14  | -2.074±0.305 | 2.45E-03 |
| cg08118311 | 18 | 76740401  | SALL3    | -3.96±1.056  | -0.446±0.925 | 2.51E-03 |
| cg05050341 | 9  | 130617534 | ENG      | 0.075±0.127  | 1.267±0.333  | 2.52E-03 |
| cg15674997 | 5  | 178421314 | GRM6     | -0.863±0.286 | 0.191±0.312  | 2.52E-03 |
| cg25298754 | 3  | 111314102 | ZBED2    | 0.124±0.245  | -1.148±0.394 | 2.53E-03 |
| cg10482024 | 1  | 65613042  | AK4      | -3.314±0.179 | -4.389±0.328 | 2.54E-03 |
| cg24697031 | 17 | 74023714  | EVPL     | 0.308±0.222  | -0.631±0.292 | 2.54E-03 |
| cg18087477 | 1  | 115397597 | SYCP1    | -0.212±0.329 | 0.859±0.266  | 2.55E-03 |
| cg11172423 | 1  | 43205623  | CLDN19   | 0.948±0.282  | 2.402±0.452  | 2.55E-03 |
| cg05345286 | 6  | 41606641  | MDF1     | -3.43±0.472  | -0.428±0.908 | 2.56E-03 |
| cg15127733 | 20 | 3713584   | HSPA12B  | -0.876±0.173 | 0.456±0.39   | 2.59E-03 |
| cg05337441 | 2  | 21266568  | APOB     | -1.121±0.298 | -2.621±0.469 | 2.60E-03 |
| cg10556064 | 16 | 68481489  | SMPD3    | -0.29±0.205  | 1.708±0.559  | 2.60E-03 |
| cg22815214 | 1  | 201083145 | ASCL5    | -0.905±0.255 | -2.334±0.442 | 2.61E-03 |
| cg15820955 | 12 | 48192939  | HDAC7    | 1.73±0.172   | 2.602±0.273  | 2.61E-03 |
| cg14607011 | 10 | 135171746 | FUOM     | 1.697±0.339  | 2.989±0.395  | 2.61E-03 |
| cg04517429 | 4  | 155413618 | DCHS2    | -2.664±0.336 | -1.54±0.307  | 2.61E-03 |
| cg01381846 | 7  | 27204785  | HOXA9    | -1.521±0.509 | 0.747±0.712  | 2.61E-03 |
| cg20767356 | 1  | 150693100 | HORMAD1  | 2.588±0.274  | 3.47±0.162   | 2.61E-03 |
| cg08260959 | 6  | 26240920  | HIST1H4F | -3.922±0.536 | -0.809±0.96  | 2.62E-03 |
| cg14902389 | 2  | 99342685  | MGAT4A   | 0.965±0.149  | 2.128±0.342  | 2.64E-03 |
| cg17945001 | 1  | 18434118  | IGSF21   | -2.675±0.311 | -1.017±0.519 | 2.69E-03 |
| cg06084117 | 7  | 132334901 | FLJ40288 | 1.424±0.245  | 2.91±0.458   | 2.71E-03 |
| cg19328294 | 16 | 2908554   | PRSS22   | -2.521±0.157 | -3.624±0.332 | 2.72E-03 |
| cg09220361 | 5  | 161494515 | GABRG2   | -2.768±0.443 | -0.699±0.655 | 2.73E-03 |
| cg01295203 | 8  | 70984199  | PRDM14   | -3.03±0.376  | -0.292±0.819 | 2.73E-03 |

|            |    |           |            |              |              |          |
|------------|----|-----------|------------|--------------|--------------|----------|
| cg23187653 | 5  | 95769008  | PCSK1      | -4.342±0.351 | -1.649±0.798 | 2.73E-03 |
| cg03289872 | 19 | 56989102  | ZNF667-AS1 | -4.102±0.369 | -0.695±0.975 | 2.74E-03 |
| cg26133068 | 22 | 24199008  | SLC2A11    | -1.274±0.356 | -2.741±0.462 | 2.78E-03 |
| cg10368842 | 10 | 115511504 | PLEKHS1    | 1.18±0.185   | -0.932±0.583 | 2.79E-03 |
| cg16715722 | 10 | 102890296 | TLX1NB     | 0.928±0.234  | 1.918±0.313  | 2.80E-03 |
| cg24715245 | 4  | 41258794  | UCHL1-AS1  | -3.252±0.437 | -0.729±0.79  | 2.84E-03 |
| cg06771126 | 4  | 57547699  | HOPX       | -0.605±0.249 | -1.866±0.4   | 2.85E-03 |
| cg07295678 | 10 | 134000009 | DPYSL4     | -3.348±0.556 | -1.121±0.702 | 2.85E-03 |
| cg12374721 | 17 | 46799640  | PRAC       | -3.156±0.417 | -0.19±0.899  | 2.90E-03 |
| cg24243265 | 8  | 130799851 | GSDMC      | 1.588±0.2    | 0.359±0.383  | 2.93E-03 |
| cg03103192 | 4  | 52917271  | SPATA18    | 0.85±0.245   | -0.591±0.453 | 2.97E-03 |
| cg07837085 | 1  | 160708990 | SLAMF7     | -0.177±0.333 | -2.295±0.657 | 2.97E-03 |
| cg14165663 | 17 | 74070269  | GALR2      | -1.246±0.321 | 0.134±0.443  | 2.99E-03 |
| cg03294491 | 18 | 45458243  | SMAD2      | -0.913±0.29  | -2.391±0.473 | 2.99E-03 |
| cg02173484 | 1  | 147245168 | GJA5       | -1.21±0.215  | 0.043±0.395  | 2.99E-03 |
| cg03996822 | 4  | 74486558  | RASSF6     | 0.177±0.129  | -1.158±0.38  | 3.00E-03 |
| cg00891541 | 16 | 68481487  | SMPD3      | -0.446±0.219 | 1.605±0.595  | 3.00E-03 |
| cg03160135 | 6  | 117586918 | VGLL2      | -2.422±0.232 | -0.655±0.534 | 3.05E-03 |
| cg02337447 | 17 | 10602032  | ADPRM      | 0.523±0.442  | -0.922±0.408 | 3.05E-03 |
| cg05414338 | 6  | 26250347  | 0          | -4.711±0.422 | -1.897±0.872 | 3.06E-03 |
| cg25094569 | 11 | 32448769  | WT1        | -3.696±0.574 | -1.111±0.837 | 3.07E-03 |
| cg16954341 | 6  | 25652381  | SCGN       | -2.262±0.269 | -0.446±0.562 | 3.07E-03 |
| cg02630888 | 4  | 15657820  | FBXL5      | 1.389±0.156  | 0.173±0.367  | 3.08E-03 |
| cg02314308 | 1  | 184006972 | COLGALT2   | -2.727±0.316 | -3.827±0.334 | 3.09E-03 |
| cg17347634 | 8  | 65711916  | CYP7B1     | -0.194±0.352 | -1.573±0.44  | 3.09E-03 |
| cg08840010 | 1  | 8000314   | TNFRSF9    | 0.239±0.503  | -1.33±0.288  | 3.11E-03 |
| cg24754277 | 9  | 90114156  | DAPK1      | -0.751±0.245 | -1.826±0.349 | 3.11E-03 |
| cg25563456 | 11 | 32456069  | WT1        | -4.111±0.39  | -1.643±0.775 | 3.11E-03 |
| cg05598246 | 6  | 29624414  | MOG        | 0.268±0.265  | 1.583±0.426  | 3.14E-03 |
| cg10521852 | 19 | 19739820  | LPAR2      | -0.573±0.34  | -2.008±0.467 | 3.21E-03 |
| cg16692277 | 13 | 51640948  | GUCY1B2    | -1.239±0.354 | -2.808±0.512 | 3.25E-03 |
| cg12058490 | 12 | 9268379   | A2M        | -0.376±0.292 | 0.971±0.44   | 3.26E-03 |
| cg07935264 | 2  | 113594375 | IL1B       | -0.823±0.231 | -2.177±0.434 | 3.30E-03 |
| cg03973663 | 8  | 56791576  | LYN        | -1.475±0.214 | -2.632±0.374 | 3.31E-03 |
| cg08005849 | 7  | 81399399  | HGF        | -1.584±0.278 | -0.232±0.442 | 3.31E-03 |
| cg14542839 | 11 | 35547074  | PAMR1      | -1.779±0.297 | -2.788±0.306 | 3.31E-03 |
| cg21130374 | 21 | 42734266  | MX2        | 0.238±0.253  | -3.261±0.97  | 3.32E-03 |
| cg15261665 | 3  | 46506374  | LTF        | -0.635±0.192 | -2.396±0.523 | 3.34E-03 |
| cg17580045 | 12 | 4384890   | CCND2      | -1.899±0.212 | -3.481±0.489 | 3.35E-03 |
| cg06910100 | 19 | 17375091  | USHBP1     | 1.128±0.241  | 2.782±0.518  | 3.35E-03 |
| cg18343862 | 11 | 10590003  | LYVE1      | 1.979±0.307  | 2.922±0.238  | 3.36E-03 |
| cg26575445 | 3  | 169756530 | GPR160     | -3.828±0.427 | -5.309±0.459 | 3.36E-03 |
| cg24664957 | 12 | 123381003 | VPS37B     | 0.059±0.102  | 1.336±0.362  | 3.40E-03 |
| cg26153642 | 3  | 183818368 | HTR3E      | 1.718±0.246  | 2.75±0.34    | 3.40E-03 |
| cg19352038 | 2  | 223164869 | PAX3       | -2.226±0.327 | -0.021±0.695 | 3.41E-03 |
| cg19297232 | 16 | 68483021  | SMPD3      | -0.144±0.247 | 0.956±0.364  | 3.46E-03 |
| cg22709192 | 12 | 54366909  | HOXC11     | -2.436±0.425 | 0.219±0.85   | 3.46E-03 |
| cg05073035 | 3  | 147127193 | ZIC1       | -2.154±0.285 | -0.709±0.475 | 3.47E-03 |
| cg10734665 | 15 | 26107410  | ATP10A     | -0.517±0.301 | -1.753±0.408 | 3.47E-03 |
| cg14116122 | 12 | 85673884  | ALX1       | -4.894±0.411 | -2.132±0.875 | 3.49E-03 |
| cg21604615 | 1  | 27668610  | SYTL1      | -0.472±0.172 | -3.04±0.714  | 3.49E-03 |
| cg21241823 | 21 | 43300024  | PRDM15     | -1.118±0.28  | -2.33±0.402  | 3.49E-03 |
| cg23910243 | 16 | 31484618  | TGFB11I    | 0.154±0.29   | 1.694±0.506  | 3.49E-03 |
| cg07780979 | 5  | 303287    | AHRR       | 3.203±0.344  | 4.422±0.389  | 3.54E-03 |
| cg12441928 | 3  | 46249985  | CCR1       | -3.171±0.466 | -4.653±0.43  | 3.54E-03 |
| cg16831889 | 15 | 50558051  | HDC        | -0.636±0.32  | 1.21±0.602   | 3.57E-03 |
| cg15279364 | 7  | 98466963  | TMEM130    | -2.939±0.184 | -0.641±0.658 | 3.58E-03 |
| cg19589427 | 1  | 173019720 | TNFSF18    | -0.475±0.278 | 1.031±0.495  | 3.58E-03 |
| cg13234863 | 12 | 130389138 | TMEM132D   | -2.842±0.45  | -0.662±0.726 | 3.62E-03 |
| cg15107670 | 11 | 32456759  | WT1        | -4.014±0.632 | -0.434±1.174 | 3.63E-03 |
| cg09022993 | 4  | 52917875  | SPATA18    | -3.364±0.234 | -4.217±0.277 | 3.64E-03 |
| cg03734874 | 14 | 105071382 | TMEM179    | -2.331±0.673 | 0.223±0.84   | 3.64E-03 |
| cg27553955 | 2  | 42720326  | KCNG3      | -2.026±0.383 | -0.356±0.56  | 3.71E-03 |
| cg06491116 | 11 | 118122715 | MPZL3      | -1.4±0.144   | -3.336±0.553 | 3.71E-03 |
| cg23967169 | 3  | 68981503  | FAM19A4    | -3.842±0.386 | -1.389±0.794 | 3.72E-03 |
| cg06722633 | 1  | 37499309  | GRIK3      | -3.353±0.508 | -0.948±0.807 | 3.77E-03 |
| cg04720330 | 11 | 2949813   | PHLDA2     | -1.817±0.26  | -3.394±0.515 | 3.78E-03 |
| cg21614638 | 4  | 100737821 | DAPP1      | 0.226±0.312  | -2.268±0.78  | 3.88E-03 |
| cg11204562 | 10 | 115511153 | PLEKHS1    | 2.526±0.274  | -0.119±0.801 | 3.89E-03 |
| cg15540820 | 3  | 27765283  | EOMES      | -3.549±0.335 | -1.246±0.74  | 3.89E-03 |
| cg15520279 | 2  | 176995088 | HOXD8      | -3.711±0.637 | -0.406±1.109 | 3.96E-03 |
| cg01861509 | 10 | 73849626  | SPOCK2     | 1.086±0.287  | 2.093±0.329  | 4.03E-03 |
| cg17527798 | 3  | 46506404  | LTF        | -0.239±0.165 | -1.986±0.524 | 4.03E-03 |
| cg12128839 | 7  | 27183436  | HOXA5      | -2.384±0.383 | -0.731±0.562 | 4.04E-03 |
| cg12989650 | 17 | 8213328   | ARHGEF15   | -0.064±0.229 | 0.746±0.266  | 4.05E-03 |
| cg12467090 | 1  | 204459139 | PIK3C2B    | 0.995±0.178  | 1.895±0.305  | 4.12E-03 |
| cg00343092 | 22 | 43547974  | TSPO       | -3.472±0.385 | -4.66±0.349  | 4.14E-03 |

|            |    |           |           |              |              |          |
|------------|----|-----------|-----------|--------------|--------------|----------|
| cg20714328 | 5  | 79331850  | THBS4     | 1.146±0.175  | 2.207±0.352  | 4.15E-03 |
| cg15534366 | 20 | 59826207  | CDH4      | 0.111±0.332  | 1.468±0.462  | 4.16E-03 |
| cg11864993 | 5  | 140559832 | PCDHB16   | -0.89±0.14   | -0.15±0.252  | 4.23E-03 |
| cg15979932 | 17 | 55980107  | CUEDC1    | 0.224±0.351  | -1.327±0.531 | 4.23E-03 |
| cg03918304 | 2  | 176981654 | HOXD10    | -1.784±0.225 | -0.445±0.446 | 4.26E-03 |
| cg03013422 | 12 | 125550350 | AACS      | -3.195±0.366 | -4.562±0.461 | 4.26E-03 |
| cg22545356 | 10 | 88716659  | MMRN2     | 0.589±0.106  | 2.009±0.417  | 4.26E-03 |
| cg03874199 | 2  | 176964456 | HOXD12    | -4.264±0.45  | -0.962±1.067 | 4.31E-03 |
| cg08047907 | 1  | 169396858 | CCDC181   | -4.771±0.434 | -1.288±1.109 | 4.32E-03 |
| cg00446235 | 1  | 161008644 | TSTD1     | -1.17±0.268  | -3.138±0.636 | 4.33E-03 |
| cg24794433 | 9  | 124462172 | DAB2IP    | -3.106±0.292 | -4.232±0.385 | 4.43E-03 |
| cg19096475 | 11 | 123066529 | CLMP      | -0.133±0.248 | 0.736±0.29   | 4.43E-03 |
| cg21591452 | 17 | 79304628  | TMEM105   | 2.744±0.231  | 0.923±0.584  | 4.44E-03 |
| cg16092786 | 11 | 32455735  | WT1       | -3.504±0.278 | -1.041±0.774 | 4.44E-03 |
| cg19831077 | 7  | 151107924 | WDR86     | -0.66±0.254  | 0.815±0.499  | 4.61E-03 |
| cg14296374 | 16 | 83841139  | HSBP1     | 1.575±0.258  | 2.465±0.298  | 4.62E-03 |
| cg26457013 | 19 | 55740188  | TMEM86B   | 2.024±0.3    | 2.971±0.299  | 4.66E-03 |
| cg23563234 | 5  | 140797286 | PCDHGB7   | -3.001±0.317 | -0.557±0.792 | 4.66E-03 |
| cg01091565 | 15 | 90294762  | MESP1     | 2.258±0.174  | 0.517±0.542  | 4.72E-03 |
| cg25524473 | 10 | 112258394 | DUSP5     | -2.178±0.26  | -3.836±0.557 | 4.73E-03 |
| cg19007731 | 8  | 93107394  | RUNX1T1   | -1.005±0.125 | 0.206±0.379  | 4.74E-03 |
| cg26322315 | 7  | 7758995   | RPA3      | 1.02±0.152   | -0.651±0.514 | 4.74E-03 |
| cg15078027 | 19 | 13858619  | CCDC130   | -2.356±1.147 | -6.063±1.199 | 4.74E-03 |
| cg17166812 | 1  | 161169574 | NDUFS2    | -1.856±0.316 | -0.919±0.271 | 4.75E-03 |
| cg00066816 | 5  | 158758353 | LOC285626 | -1.282±0.28  | -2.385±0.385 | 4.90E-03 |
| cg12127282 | 2  | 177014685 | MIR10B    | -1.865±0.272 | 0.26±0.694   | 4.90E-03 |
| cg05774801 | 4  | 154709756 | SFRP2     | -3.574±0.582 | -1.7±0.61    | 4.91E-03 |
| cg03875678 | 14 | 25103546  | GZMB      | -0.315±0.129 | -1.658±0.419 | 4.95E-03 |
| cg20775254 | 2  | 95940705  | PROM2     | 1.432±0.126  | 0.098±0.416  | 5.00E-03 |
| cg17142183 | 2  | 102608192 | IL1R2     | 1.376±0.302  | -0.666±0.685 | 5.01E-03 |
| cg09944526 | 10 | 94594201  | EXOC6     | 0.153±0.156  | 1.631±0.469  | 5.01E-03 |
| cg10896774 | 7  | 142636840 | C7orf34   | -1.032±0.18  | -2.254±0.411 | 5.09E-03 |
| cg05976074 | 19 | 33716273  | SLC7A10   | -1.209±0.259 | 0.275±0.512  | 5.09E-03 |
| cg17349199 | 10 | 118429452 | C10orf82  | 0.274±0.222  | 1.564±0.444  | 5.10E-03 |
| cg02055963 | 13 | 28543520  | CDX2      | -3.77±0.389  | -1.075±0.905 | 5.17E-03 |
| cg11260848 | 11 | 44326260  | ALX4      | -2.109±0.313 | -0.551±0.547 | 5.17E-03 |
| cg13348944 | 11 | 118047121 | SCN2B     | -1.27±0.286  | 0.346±0.56   | 5.18E-03 |
| cg12869058 | 1  | 94587872  | ABCA4     | 1.531±0.252  | -0.387±0.635 | 5.20E-03 |
| cg20059151 | 1  | 95286311  | SLC44A3   | -1.616±0.246 | -2.318±0.19  | 5.20E-03 |
| cg15996947 | 14 | 50780115  | ATP5S     | 2.017±0.256  | 2.883±0.295  | 5.21E-03 |
| cg02813863 | 12 | 12938287  | APOLD1    | 1.378±0.292  | 2.355±0.331  | 5.24E-03 |
| cg14289985 | 19 | 57018848  | ZNF471    | -4.103±0.486 | -0.916±1.084 | 5.25E-03 |
| cg13870494 | 9  | 72658358  | MAMDC2    | -1.189±0.264 | 0.526±0.586  | 5.34E-03 |
| cg20831708 | 10 | 102279373 | SEC31B    | -0.768±0.449 | 0.682±0.485  | 5.35E-03 |
| cg20959866 | 1  | 4714008   | AJAP1     | -3.464±0.363 | -1.016±0.832 | 5.35E-03 |
| cg23582919 | 16 | 23568380  | EARS2     | -3.303±0.335 | -4.346±0.339 | 5.35E-03 |
| cg25750259 | 20 | 43104962  | TTPAL     | -3.107±0.356 | -4.557±0.516 | 5.35E-03 |
| cg03931808 | 19 | 14139099  | RLN3      | 2.636±0.216  | 3.453±0.289  | 5.36E-03 |
| cg13958614 | 5  | 72744196  | FOXD1     | -2.313±0.368 | -0.016±0.79  | 5.36E-03 |
| cg27248887 | 2  | 207025417 | EEF1B2    | -0.312±0.32  | -1.283±0.309 | 5.36E-03 |
| cg00534274 | 4  | 139163341 | SLC7A11   | -0.662±0.531 | -2.173±0.288 | 5.36E-03 |
| cg01775265 | 20 | 31780882  | BPIFA4P   | -0.786±0.301 | 0.284±0.373  | 5.36E-03 |
| cg01335367 | 12 | 110172208 | FAM222A   | -2.422±0.285 | -0.246±0.727 | 5.37E-03 |
| cg17788832 | 8  | 87081654  | PSKH2     | -1.137±0.154 | -0.189±0.327 | 5.38E-03 |
| cg14614211 | 10 | 28034247  | MKX       | -3.206±0.496 | -0.303±1.01  | 5.39E-03 |
| cg10062065 | 2  | 220308747 | SPEG      | 2.117±0.326  | 3.16±0.349   | 5.42E-03 |
| cg16638540 | 19 | 58570468  | ZNF135    | -2.379±0.54  | 0.292±0.952  | 5.53E-03 |
| cg10316764 | 16 | 29984665  | TAOK2     | -0.895±0.262 | 0.128±0.367  | 5.63E-03 |
| cg24928687 | 1  | 226012913 | EPHX1     | 1.661±0.198  | 2.872±0.422  | 5.65E-03 |
| cg20792294 | 11 | 2165425   | IGF2-AS   | -3.879±0.344 | -1.169±0.908 | 5.71E-03 |
| cg12062492 | 14 | 24423140  | DHRS4     | -1.932±0.296 | -2.812±0.113 | 5.71E-03 |
| cg22346765 | 6  | 41007522  | UNC5CL    | 1.702±0.227  | -0.188±0.629 | 5.71E-03 |
| cg03064067 | 12 | 85306916  | SLC6A15   | -2.788±0.253 | -0.58±0.728  | 5.71E-03 |
| cg21331821 | 19 | 58545149  | ZSCAN1    | -4.418±0.706 | -1.09±1.197  | 5.71E-03 |
| cg20247048 | 17 | 62972358  | AMZ2P1    | -2.965±0.207 | -4.248±0.447 | 5.72E-03 |
| cg08888956 | 12 | 86267839  | NTS       | -0.186±0.225 | 0.479±0.209  | 5.73E-03 |
| cg24867501 | 22 | 50925337  | MIOX      | 1.361±0.214  | 0.023±0.466  | 5.74E-03 |
| cg06710648 | 1  | 58716377  | DAB1      | -1.662±0.341 | -0.182±0.535 | 5.74E-03 |
| cg24895052 | 17 | 41909601  | MPP3      | 1.09±0.326   | 2.06±0.309   | 5.80E-03 |
| cg26117431 | 1  | 100643544 | LRRC39    | 1.765±0.133  | 2.496±0.26   | 5.80E-03 |
| cg07785936 | 2  | 133174635 | GPR39     | 1.034±0.283  | -0.001±0.37  | 5.81E-03 |
| cg24713204 | 19 | 57019373  | ZNF471    | -1.222±0.472 | 0.084±0.334  | 5.84E-03 |
| cg00005847 | 2  | 177029073 | HOXD3     | -2.14±0.223  | -0.682±0.507 | 5.85E-03 |
| cg04317399 | 7  | 27170313  | HOXA4     | -0.978±0.183 | 0.623±0.532  | 5.88E-03 |
| cg11536940 | 8  | 97658076  | CPQ       | -2.44±0.366  | -3.706±0.45  | 5.91E-03 |
| cg20644981 | 4  | 152020400 | RPS3A     | -2.063±0.191 | -3.992±0.629 | 5.92E-03 |
| cg09155025 | 8  | 145642024 | SLC39A4   | 1.862±0.24   | 0.976±0.319  | 5.92E-03 |

|            |    |           |          |              |              |          |
|------------|----|-----------|----------|--------------|--------------|----------|
| cg08319404 | 3  | 24537435  | THRB     | -0.021±0.275 | -1.758±0.608 | 5.93E-03 |
| cg01152019 | 2  | 177015044 | MIR10B   | -3.458±0.202 | -1.53±0.635  | 5.95E-03 |
| cg10539507 | 4  | 85420782  | NKX6-1   | -3.084±0.432 | -0.618±0.877 | 5.95E-03 |
| cg12448933 | 17 | 72667378  | RAB37    | -2.635±0.467 | -0.709±0.701 | 5.95E-03 |
| cg06214007 | 1  | 89829308  | GBP6     | -1.642±0.274 | -2.568±0.327 | 5.95E-03 |
| cg09543783 | 19 | 47248096  | FKRP     | 2.476±0.265  | 3.415±0.337  | 5.96E-03 |
| cg05441133 | 10 | 48416891  | GDF2     | 0.712±0.289  | 2.752±0.704  | 5.97E-03 |
| cg15937958 | 19 | 42947133  | CXCL17   | 1.29±0.334   | 0.09±0.431   | 5.97E-03 |
| cg24272559 | 1  | 166572716 | FMO9P    | 2.08±0.401   | 0.562±0.551  | 5.98E-03 |
| cg03005261 | 4  | 110480828 | CCDC109B | -1.723±0.335 | -3.171±0.529 | 6.00E-03 |
| cg11647681 | 5  | 140810161 | PCDHGA12 | -1.479±0.295 | 0.131±0.579  | 6.09E-03 |
| cg02932167 | 2  | 233352951 | ECCL1    | 0.305±0.147  | 1.346±0.361  | 6.10E-03 |
| cg09243021 | 7  | 142985019 | CASP2    | -1.375±0.267 | 0.609±0.682  | 6.10E-03 |
| cg26750747 | 11 | 71899966  | FOLR1    | 1.834±0.297  | 2.719±0.291  | 6.12E-03 |
| cg03317245 | 17 | 3600514   | P2RX5    | 0.563±0.269  | 1.667±0.404  | 6.12E-03 |
| cg00840403 | 16 | 71560205  | CHST4    | -2.245±0.242 | -3.422±0.428 | 6.12E-03 |
| cg07339327 | 11 | 69461109  | CCND1    | 3.165±0.323  | 4.058±0.167  | 6.19E-03 |
| cg06254453 | 6  | 26250350  | 0        | -5.29±0.831  | -2.591±0.949 | 6.19E-03 |
| cg13247990 | 16 | 46782176  | MYLK3    | 1.431±0.113  | 2.277±0.292  | 6.19E-03 |
| cg15842276 | 11 | 92702648  | MTNR1B   | -0.736±0.448 | 0.694±0.498  | 6.20E-03 |
| cg16463460 | 11 | 32454718  | WT1      | -1.169±0.135 | 0.234±0.462  | 6.20E-03 |
| cg05726109 | 22 | 19709755  | GP1BB    | 1.088±0.102  | 2.82±0.541   | 6.20E-03 |
| cg22485810 | 17 | 29248725  | ADAP2    | -1.096±0.246 | -2.673±0.557 | 6.20E-03 |
| cg23317501 | 5  | 35991215  | UGT3A1   | -3.018±0.421 | -1.326±0.622 | 6.20E-03 |
| cg16873863 | 11 | 2921176   | SLC22A18 | 1.195±0.169  | -0.933±0.683 | 6.21E-03 |
| cg24762359 | 13 | 25254447  | ATP12A   | -3.061±0.193 | -4.566±0.515 | 6.21E-03 |
| cg26162582 | 12 | 4918391   | KCNA6    | -3.855±0.456 | -0.432±1.179 | 6.23E-03 |
| cg16009558 | 6  | 101846707 | GRIK2    | -3.666±0.595 | -0.906±1.015 | 6.23E-03 |
| cg19358493 | 10 | 119300942 | EMX2     | -3.815±0.52  | -1.578±0.825 | 6.24E-03 |
| cg04041960 | 10 | 121301765 | RGS10    | -2.78±0.445  | -4.04±0.193  | 6.24E-03 |
| cg08241785 | 5  | 75919281  | F2RL2    | -1.381±0.272 | -2.424±0.384 | 6.28E-03 |
| cg23037403 | 5  | 178368183 | ZNF454   | -3.19±0.432  | -0.718±0.891 | 6.32E-03 |
| cg18110483 | 5  | 79330959  | THBS4    | -4.162±0.457 | -1.285±1.027 | 6.49E-03 |
| cg26490372 | 8  | 125552608 | NDUFB9   | 0.342±0.229  | 1.33±0.367   | 6.52E-03 |
| cg19947621 | 9  | 34263021  | KIF24    | 1.535±0.296  | 0.3±0.46     | 6.68E-03 |
| cg10957151 | 2  | 176986956 | HOXD9    | -2.237±0.319 | -0.208±0.727 | 6.73E-03 |
| cg17214107 | 4  | 123747542 | FGF2     | -2.583±0.26  | -1.117±0.534 | 6.73E-03 |
| cg19456540 | 14 | 60976285  | SIX6     | -4.708±0.428 | -0.739±1.347 | 6.73E-03 |
| cg03522063 | 10 | 119302167 | EMX2     | -4.216±0.59  | -1.37±1.056  | 6.74E-03 |
| cg17241310 | 1  | 91182856  | BARHL2   | -3.162±0.844 | -0.502±0.94  | 6.74E-03 |
| cg26202340 | 11 | 126152357 | TIRAP    | -2.326±0.182 | -3.754±0.496 | 6.75E-03 |
| cg19961522 | 20 | 30407388  | MYLK2    | 1.698±0.133  | 2.148±0.164  | 6.80E-03 |
| cg14265075 | 1  | 157016521 | ARHGEF11 | -1.51±0.43   | -3.257±0.654 | 6.88E-03 |
| cg01281904 | 8  | 54164757  | OPRK1    | -0.283±0.194 | 0.955±0.445  | 6.89E-03 |
| cg12266049 | 11 | 69461334  | CCND1    | 2.495±0.269  | 4.246±0.628  | 6.89E-03 |
| cg22243733 | 11 | 7506434   | OLFML1   | 0.802±0.257  | 1.698±0.331  | 6.92E-03 |
| cg17217677 | 16 | 68483194  | SMPD3    | 1.655±0.224  | 2.693±0.388  | 6.92E-03 |
| cg16776717 | 5  | 147163101 | JAKMIP2  | -1.116±0.359 | -0.02±0.382  | 6.93E-03 |
| cg25875213 | 19 | 38183055  | ZNF781   | -5.462±0.865 | -0.796±1.721 | 6.98E-03 |
| cg17063929 | 11 | 89224799  | NOX4     | -2.429±0.338 | -0.34±0.757  | 6.99E-03 |
| cg14564494 | 21 | 37506911  | CBR3     | -1.043±0.275 | -2.793±0.632 | 7.00E-03 |
| cg04057858 | 8  | 10383763  | PRSS55   | 1.509±0.139  | 0.132±0.467  | 7.01E-03 |
| cg21460582 | 15 | 76005861  | CSPG4    | 0.202±0.096  | 0.948±0.262  | 7.01E-03 |
| cg04809787 | 17 | 7348339   | CHRNA1   | -1.691±0.278 | -3.549±0.667 | 7.03E-03 |
| cg25781162 | 2  | 44065996  | ABCG5    | 1.781±0.154  | 2.67±0.327   | 7.22E-03 |
| cg20795913 | 17 | 40718830  | MLX      | -0.303±0.198 | 0.714±0.38   | 7.24E-03 |
| cg03625911 | 1  | 203155737 | CHI3L1   | 0.292±0.22   | -0.747±0.391 | 7.29E-03 |
| cg27665659 | 7  | 100797595 | AP1S1    | -3.854±0.276 | -4.916±0.401 | 7.29E-03 |
| cg24820809 | 22 | 36019252  | MB       | 2.692±0.26   | 0.648±0.721  | 7.30E-03 |
| cg02941816 | 10 | 131265696 | MGMT     | -3.805±0.232 | -4.497±0.241 | 7.32E-03 |
| cg05755354 | 10 | 14372596  | FRMD4A   | 1.44±0.142   | 2.308±0.318  | 7.36E-03 |
| cg26316946 | 6  | 101846967 | GRIK2    | -2.491±0.295 | -0.062±0.854 | 7.38E-03 |
| cg13282837 | 14 | 96180648  | TCL1A    | -0.744±0.309 | 0.545±0.49   | 7.38E-03 |
| cg02329886 | 15 | 50557917  | HDC      | 1.883±0.223  | 2.572±0.247  | 7.38E-03 |
| cg26986236 | 19 | 34855715  | GPI      | -2.456±0.269 | -3.6±0.434   | 7.38E-03 |
| cg13552869 | 16 | 29909924  | SEZ6L2   | -1.055±0.286 | -0.055±0.375 | 7.39E-03 |
| cg20340242 | 2  | 102608349 | IL1R2    | -0.208±0.127 | -1.317±0.386 | 7.39E-03 |
| cg14721213 | 1  | 171154612 | FMO2     | 0.11±0.192   | 1.277±0.428  | 7.40E-03 |
| cg27243140 | 17 | 72931664  | OTOP3    | -2.659±0.552 | -1.043±0.559 | 7.52E-03 |
| cg03743584 | 10 | 135160908 | PRAP1    | -2.488±0.207 | -0.861±0.579 | 7.61E-03 |
| cg10031456 | 2  | 33661691  | RASGRP3  | 0.226±0.17   | 1.223±0.371  | 7.61E-03 |
| cg13608094 | 11 | 69461236  | CCND1    | 2.516±0.33   | 3.941±0.544  | 7.67E-03 |
| cg19118077 | 10 | 5137178   | AKR1C3   | -1.095±0.193 | -2.589±0.534 | 7.72E-03 |
| cg27218220 | 9  | 124856396 | TTL11    | 2.31±0.312   | 3.151±0.258  | 7.74E-03 |
| cg07084709 | 15 | 57883511  | MYZAP    | 3.407±0.4    | 1.004±0.892  | 7.79E-03 |
| cg08109815 | 6  | 142409831 | NMBR     | -1.577±0.377 | -0.082±0.573 | 7.80E-03 |
| cg11880010 | 9  | 79328644  | PRUNE2   | -0.482±0.268 | 1.098±0.589  | 7.81E-03 |

|            |    |           |          |              |              |          |
|------------|----|-----------|----------|--------------|--------------|----------|
| cg22815110 | 1  | 63788933  | FOXD3    | -3.062±0.374 | -0.127±1.05  | 7.81E-03 |
| cg15310162 | 21 | 37852822  | CLDN14   | 0.756±0.236  | 1.682±0.355  | 7.81E-03 |
| cg01512854 | 5  | 140480967 | PCDHB3   | -0.965±0.328 | 0.332±0.498  | 7.82E-03 |
| cg26366091 | 1  | 111770274 | CHI3L2   | -1.241±0.297 | -2.642±0.535 | 7.82E-03 |
| cg13449778 | 1  | 179712298 | FAM163A  | -4.567±0.704 | -1.139±1.307 | 7.91E-03 |
| cg06022562 | 17 | 80797881  | ZNF750   | 2.017±0.286  | 0.773±0.479  | 7.98E-03 |
| cg21960882 | 16 | 32264404  | TP53TG3D | 0.427±0.362  | 1.427±0.33   | 8.00E-03 |
| cg21277505 | 19 | 50978348  | EMC10    | 2.689±0.239  | 3.33±0.105   | 8.06E-03 |
| cg18873386 | 7  | 96651915  | DLX5     | -1.452±0.29  | -0.322±0.436 | 8.07E-03 |
| cg24625128 | 11 | 133939064 | JAM3     | -5.274±0.39  | -1.915±1.195 | 8.07E-03 |
| cg05221167 | 19 | 9609397   | ZNF560   | -3.628±0.442 | -0.855±1.032 | 8.20E-03 |
| cg19697981 | 6  | 108487820 | NR2E1    | -3.428±0.326 | -1.918±0.582 | 8.21E-03 |
| cg24641352 | 8  | 144328078 | ZFP41    | -0.633±0.272 | 0.798±0.545  | 8.27E-03 |
| cg23352695 | 17 | 29648811  | EVI2A    | 0.385±0.374  | -1.132±0.589 | 8.30E-03 |
| cg00916635 | 1  | 114414312 | PTPN22   | 0.999±0.425  | -1.939±1.084 | 8.39E-03 |
| cg04569233 | 3  | 39321449  | CX3CR1   | 0.511±0.182  | -0.333±0.327 | 8.43E-03 |
| cg14370448 | 16 | 30103978  | TBX6     | -3.142±0.269 | -4.518±0.528 | 8.43E-03 |
| cg13641903 | 11 | 32452608  | WT1      | -0.328±0.269 | 1.184±0.574  | 8.48E-03 |
| cg23207990 | 4  | 154710535 | SFRP2    | -3.517±0.403 | -0.386±1.141 | 8.61E-03 |
| cg05508084 | 19 | 56988398  | ZNF667   | -3.409±0.452 | -0.75±1.009  | 8.77E-03 |
| cg09949775 | 19 | 18902107  | COMP     | -2.281±0.376 | -0.021±0.855 | 8.78E-03 |
| cg01359534 | 1  | 154293651 | AQP10    | 0.92±0.195   | 1.733±0.318  | 8.78E-03 |
| cg00411097 | 7  | 1596050   | TMEM184A | 0.079±0.174  | -0.996±0.406 | 8.79E-03 |
| cg25856811 | 1  | 152973957 | SPRR3    | 0.604±0.288  | -0.825±0.553 | 8.83E-03 |
| cg26200585 | 19 | 40919245  | PRX      | -0.317±0.248 | 1.732±0.744  | 8.83E-03 |
| cg07959477 | 12 | 10251879  | CLEC1A   | -0.358±0.08  | 1.249±0.539  | 8.84E-03 |
| cg09964921 | 21 | 35885767  | KCNE1    | 1.704±0.179  | 2.413±0.278  | 8.85E-03 |
| cg16173067 | 20 | 1309722   | SDCBP2   | 2.011±0.159  | 0.418±0.565  | 8.85E-03 |
| cg07086380 | 5  | 118691033 | TNFAIP8  | 1.246±0.22   | -0.332±0.585 | 8.86E-03 |
| cg20367961 | 1  | 41950237  | EDN2     | 1.141±0.104  | 0.437±0.263  | 8.86E-03 |
| cg04080057 | 19 | 54495183  | CACNG6   | -1.309±0.183 | -0.353±0.37  | 8.99E-03 |
| cg22858288 | 11 | 2930322   | SLC22A18 | 0.548±0.447  | 1.857±0.477  | 8.99E-03 |
| cg13376158 | 17 | 73128023  | NT5C     | -4.034±0.26  | -5.298±0.493 | 9.02E-03 |
| cg14701962 | 1  | 162348010 | C1orf226 | 0.816±0.279  | 1.953±0.448  | 9.02E-03 |
| cg25356886 | 2  | 208988967 | CRYGD    | -0.082±0.153 | 0.603±0.269  | 9.05E-03 |
| cg26416466 | 15 | 66546708  | MEGF11   | -3.395±0.807 | -0.991±0.889 | 9.05E-03 |
| cg14012294 | 5  | 72794041  | BT3      | -4.16±0.352  | -5.286±0.43  | 9.05E-03 |
| cg01169610 | 2  | 99135471  | INPP4A   | 2.246±0.237  | 0.323±0.704  | 9.06E-03 |
| cg03544320 | 4  | 5894691   | CRMP1    | -1.191±0.822 | 0.915±0.609  | 9.12E-03 |
| cg09924998 | 12 | 122751933 | VPS33A   | -0.242±0.263 | -1.239±0.394 | 9.28E-03 |
| cg05140736 | 17 | 78195518  | SGSH     | 1.122±0.157  | 2.391±0.467  | 9.32E-03 |
| cg24402880 | 4  | 84035837  | PLAC8    | -0.364±0.317 | -1.558±0.472 | 9.33E-03 |
| cg11965370 | 11 | 131780946 | NTM      | -3.048±0.767 | -0.404±1.036 | 9.34E-03 |
| cg01753375 | 2  | 74607600  | DCTN1    | -0.493±0.186 | 0.597±0.42   | 9.40E-03 |
| cg21747271 | 11 | 67250052  | AIP      | 0.08±0.245   | -1.863±0.718 | 9.41E-03 |
| cg08369065 | 8  | 11562683  | GATA4    | -3.916±0.261 | -1.033±1.03  | 9.58E-03 |
| cg04726200 | 11 | 2930485   | SLC22A18 | 0.317±0.3    | 1.442±0.447  | 9.58E-03 |
| cg11884699 | 6  | 132023285 | OR2A4    | 1.229±0.124  | 1.853±0.245  | 9.60E-03 |
| cg25778479 | 7  | 16686771  | BZW2     | -0.493±0.234 | -2.04±0.588  | 9.60E-03 |
| cg05482722 | 13 | 52598175  | UTP14C   | 2.384±0.43   | 3.476±0.217  | 9.62E-03 |
| cg13548361 | 10 | 104178949 | PSD      | -4.055±0.396 | -2.547±0.6   | 9.62E-03 |
| cg01095482 | 1  | 43765796  | TIE1     | 2.434±0.218  | 3.268±0.332  | 9.70E-03 |
| cg07644368 | 5  | 115152785 | CDO1     | -1.816±0.234 | -0.216±0.608 | 9.74E-03 |
| cg07455975 | 2  | 175112849 | OLA1     | -3.465±0.2   | -4.861±0.529 | 9.76E-03 |
| cg09813840 | 12 | 109027422 | SELPLG   | -0.536±0.319 | -2.524±0.765 | 9.77E-03 |
| cg11532513 | 3  | 54962242  | LRTM1    | 1.513±0.316  | 3.023±0.599  | 9.78E-03 |
| cg00101227 | 1  | 161280266 | MPZ      | 1.365±0.254  | 2.113±0.281  | 9.86E-03 |
| cg12951282 | 17 | 7018416   | ASGR2    | -0.344±0.128 | -2.272±0.675 | 9.87E-03 |
| cg27285599 | 17 | 80798023  | ZNF750   | 1.827±0.225  | 0.351±0.565  | 9.87E-03 |
| cg13903548 | 6  | 90024543  | GABRR2   | 1.578±0.218  | 2.457±0.352  | 9.88E-03 |
| cg06621358 | 3  | 48699637  | CELSR3   | -2.222±0.262 | -0.687±0.597 | 9.94E-03 |
| cg06615154 | 1  | 153522553 | S100A3   | 0.656±0.162  | 2.051±0.516  | 9.94E-03 |
| cg14448116 | 1  | 161170110 | NDUFS2   | 1.005±0.224  | 2.36±0.526   | 9.96E-03 |
| cg04456238 | 11 | 32450104  | WT1      | -1.628±0.239 | 0.137±0.667  | 9.98E-03 |

<sup>a</sup>Probe IDs for the Infinium HumanMethylation27 BeadChip (Illumina). <sup>b</sup>National Center for Biotechnology Information (NCBI) Database (Genome Build 37).

Supplementary Table 5C. The 792 probes showing significant differences in DNA methylation levels between adjacent normal lung tissue (N) samples and tumorous tissue (T) samples from patients belonging to the KRAS mutation group.

| Probe ID <sup>a</sup> | Chromosome | Position <sup>b</sup> | Gene symbol       | M-values (mean±SD) |              | FDR, q   |
|-----------------------|------------|-----------------------|-------------------|--------------------|--------------|----------|
|                       |            |                       |                   | N                  | T            |          |
| cg12880658            | 5          | 115152386             | <i>CDO1</i>       | -4.676±0.437       | -0.383±0.712 | 1.46E-08 |
| cg25720804            | 5          | 170736389             | <i>TLX3</i>       | -2.58±0.584        | 0.42±0.457   | 6.04E-08 |
| cg21790626            | 19         | 58220494              | <i>ZNF154</i>     | -3.773±0.48        | 0.028±0.777  | 1.28E-07 |
| cg08668790            | 19         | 58220662              | <i>ZNF154</i>     | -3.39±0.491        | -0.103±0.689 | 1.69E-07 |
| cg00446235            | 1          | 161008644             | <i>TSTD1</i>      | -1.199±0.353       | -2.858±0.359 | 5.40E-07 |
| cg02681442            | 14         | 29236008              | <i>FOXG1</i>      | -2.899±0.366       | -0.87±0.499  | 1.23E-06 |
| cg16731240            | 19         | 52391250              | <i>ZNF577</i>     | -1.913±0.638       | 1.319±0.787  | 1.37E-06 |
| cg25942450            | 5          | 170736251             | <i>TLX3</i>       | -2.546±0.287       | -0.196±0.565 | 1.99E-06 |
| cg02189785            | 9          | 139891008             | <i>CLIC3</i>      | -1.432±0.415       | -3.057±0.245 | 2.58E-06 |
| cg13153865            | 8          | 90914101              | <i>OSGIN2</i>     | -3.043±0.322       | -4.289±0.268 | 2.60E-06 |
| cg12111714            | 13         | 26043472              | <i>ATP8A2</i>     | -1.41±0.45         | 0.573±0.511  | 2.62E-06 |
| cg24898753            | 11         | 61735917              | <i>FTH1</i>       | -0.792±0.346       | -2.562±0.467 | 2.64E-06 |
| cg09325711            | 7          | 39662764              | <i>RALA</i>       | -2.6±0.444         | -4.265±0.34  | 2.81E-06 |
| cg07104706            | 13         | 84456127              | <i>SLITRK1</i>    | -3.552±0.336       | -1.025±0.655 | 3.36E-06 |
| cg15387123            | 9          | 139891058             | <i>CLIC3</i>      | -0.791±0.407       | -2.435±0.429 | 4.32E-06 |
| cg19205041            | 6          | 143929511             | <i>PHACTR2</i>    | 0.743±0.416        | 2.317±0.388  | 4.45E-06 |
| cg02994956            | 22         | 29876534              | <i>NEFH</i>       | -0.904±0.396       | 0.569±0.367  | 5.42E-06 |
| cg18536148            | 17         | 59533844              | <i>TBX4</i>       | -1.127±0.333       | 0.69±0.519   | 6.36E-06 |
| cg23095584            | 2          | 237077704             | <i>GBX2</i>       | -2.289±0.441       | -0.289±0.572 | 6.41E-06 |
| cg03013422            | 12         | 125550350             | <i>AACS</i>       | -3.342±0.337       | -4.497±0.243 | 7.24E-06 |
| cg01683883            | 16         | 66613053              | <i>CMTM2</i>      | -1.766±0.24        | 0.502±0.6    | 7.33E-06 |
| cg06766367            | 16         | 67062687              | <i>CBFB</i>       | -2.03±0.368        | -3.296±0.235 | 7.36E-06 |
| cg15540820            | 3          | 27765283              | <i>EOMES</i>      | -3.1±0.227         | -0.512±0.668 | 7.82E-06 |
| cg26521404            | 7          | 27204981              | <i>HOXA9</i>      | -2.195±0.572       | 0.528±0.806  | 8.29E-06 |
| cg20366906            | 13         | 53422381              | <i>PCDH8</i>      | -1.85±0.436        | -0.394±0.337 | 9.43E-06 |
| cg05221167            | 19         | 9609397               | <i>ZNF560</i>     | -3.143±0.558       | -0.937±0.643 | 9.57E-06 |
| cg10896774            | 7          | 142636840             | <i>C7orf34</i>    | -1.209±0.347       | -2.446±0.331 | 9.73E-06 |
| cg17241310            | 1          | 91182856              | <i>BARHL2</i>     | -2.752±0.605       | -0.216±0.752 | 9.77E-06 |
| cg27409364            | 11         | 17757743              | <i>KCNC1</i>      | -0.789±0.456       | 0.713±0.348  | 1.15E-05 |
| cg26799474            | 2          | 202098951             | <i>CASP8</i>      | 0.692±0.57         | -1.209±0.474 | 1.16E-05 |
| cg15489294            | 5          | 115297853             | <i>AQPEP</i>      | -1.65±0.332        | -0.096±0.481 | 1.29E-05 |
| cg06908778            | 10         | 22634602              | <i>SPAG6</i>      | -2.488±0.294       | -0.119±0.695 | 1.51E-05 |
| cg21604615            | 1          | 27668610              | <i>SYTL1</i>      | -0.807±0.423       | -2.557±0.546 | 1.57E-05 |
| cg08876932            | 11         | 71955547              | <i>PHOX2A</i>     | -3.88±0.546        | -1.002±0.901 | 1.58E-05 |
| cg01335367            | 12         | 110172208             | <i>FAM222A</i>    | -2.308±0.416       | 0.087±0.747  | 1.61E-05 |
| cg12374721            | 17         | 46799640              | <i>PRAC</i>       | -2.967±0.363       | 0.022±0.887  | 1.77E-05 |
| cg04420907            | 17         | 9480215               | <i>WDR16</i>      | -3.006±0.485       | -4.642±0.474 | 1.99E-05 |
| cg08109815            | 6          | 142409831             | <i>NMBR</i>       | -1.387±0.301       | -0.071±0.424 | 2.03E-05 |
| cg25964007            | 17         | 9479910               | <i>WDR16</i>      | -1.783±0.544       | -4.127±0.759 | 2.08E-05 |
| cg23033845            | 17         | 7758662               | <i>TMEM88</i>     | 1.466±0.282        | 2.386±0.257  | 2.08E-05 |
| cg13870866            | 7          | 35293130              | <i>TBX20</i>      | -2.352±0.363       | -0.371±0.636 | 2.08E-05 |
| cg13699808            | 20         | 45985339              | <i>ZMYND8</i>     | -1.039±0.401       | -2.594±0.498 | 2.22E-05 |
| cg03874199            | 2          | 176964456             | <i>HOXD12</i>     | -3.794±0.416       | -1.125±0.849 | 2.32E-05 |
| cg11450827            | 22         | 19513006              | <i>CLDN5</i>      | 0.479±0.386        | 1.677±0.314  | 2.38E-05 |
| cg23130254            | 2          | 176964588             | <i>HOXD12</i>     | -2.714±0.552       | -0.352±0.779 | 2.39E-05 |
| cg25802093            | 10         | 22634038              | <i>SPAG6</i>      | -1.975±0.385       | 0.216±0.712  | 2.41E-05 |
| cg01580681            | 4          | 174450016             | <i>HAND2</i>      | -2.118±0.305       | 0.024±0.677  | 2.42E-05 |
| cg08369065            | 8          | 11562683              | <i>GATA4</i>      | -3.384±0.433       | -1.069±0.766 | 2.70E-05 |
| cg27389185            | 19         | 38042123              | <i>ZNF571-AS1</i> | -1.605±0.354       | -0.177±0.475 | 2.87E-05 |
| cg10235817            | 4          | 3768555               | <i>ADRA2C</i>     | -1.858±0.461       | -0.071±0.593 | 2.95E-05 |
| cg07175883            | 2          | 176957908             | <i>HOXD13</i>     | -4.972±0.551       | -1.532±1.131 | 3.10E-05 |
| cg03336167            | 11         | 2930995               | <i>SLC22A18</i>   | -0.432±0.493       | 1.108±0.454  | 3.39E-05 |
| cg26575445            | 3          | 169756530             | <i>GPR160</i>     | -3.668±0.449       | -5.339±0.561 | 3.69E-05 |
| cg27120999            | 14         | 65008050              | <i>HSPA2</i>      | -0.983±0.571       | 0.856±0.575  | 3.83E-05 |
| cg04081402            | 22         | 31003587              | <i>TCN2</i>       | 1.176±0.359        | 2.289±0.34   | 4.38E-05 |
| cg05521696            | 12         | 8025495               | <i>SLC2A14</i>    | -2.472±0.35        | -0.409±0.71  | 5.15E-05 |
| cg01882150            | 11         | 63933998              | <i>MACROD1</i>    | -3.552±0.29        | -4.37±0.196  | 5.70E-05 |
| cg03975694            | 19         | 38042472              | <i>ZNF540</i>     | -1.954±0.403       | 0.178±0.753  | 5.97E-05 |
| cg27009703            | 7          | 27204894              | <i>HOXA9</i>      | -0.844±0.248       | 0.6±0.504    | 6.02E-05 |
| cg21130374            | 21         | 42734266              | <i>MX2</i>        | -0.144±0.499       | -2.034±0.667 | 6.03E-05 |
| cg18752880            | 5          | 34043509              | <i>C1QTNF3</i>    | -1.759±0.529       | 0.032±0.615  | 6.19E-05 |
| cg22472290            | 19         | 52391480              | <i>ZNF577</i>     | -1.189±0.518       | 0.309±0.437  | 6.23E-05 |
| cg26530341            | 8          | 23083353              | <i>LOC389641</i>  | 1.622±0.407        | -0.188±0.65  | 6.25E-05 |
| cg06615154            | 1          | 153522553             | <i>S100A3</i>     | 0.819±0.285        | 1.844±0.362  | 6.53E-05 |
| cg25993718            | 20         | 54580196              | <i>CBLN4</i>      | -2.442±0.373       | -0.643±0.648 | 6.60E-05 |

|            |    |           |                  |              |              |          |
|------------|----|-----------|------------------|--------------|--------------|----------|
| cg03177025 | 2  | 28112917  | <i>RBKS</i>      | -1.615±0.415 | -2.899±0.424 | 6.87E-05 |
| cg18343862 | 11 | 10590003  | <i>LYVE1</i>     | 1.859±0.355  | 2.834±0.217  | 7.15E-05 |
| cg01354473 | 7  | 27204803  | <i>HOXA9</i>     | -2.372±0.404 | 0.204±0.912  | 7.51E-05 |
| cg26252167 | 6  | 110300573 | <i>GPR6</i>      | -2.768±0.695 | -0.778±0.609 | 7.94E-05 |
| cg08785215 | 3  | 57993979  | <i>FLNB</i>      | -3.923±0.247 | -4.925±0.37  | 8.53E-05 |
| cg22628926 | 17 | 4844700   | <i>RNF167</i>    | -1.511±0.228 | -2.417±0.334 | 8.56E-05 |
| cg22660578 | 17 | 35294029  | <i>LHX1</i>      | -2.517±0.516 | 0.096±0.964  | 9.09E-05 |
| cg27665659 | 7  | 100797595 | <i>AP1S1</i>     | -3.858±0.298 | -4.673±0.234 | 9.56E-05 |
| cg23037403 | 5  | 178368183 | <i>ZNF454</i>    | -2.486±0.654 | -0.324±0.786 | 1.04E-04 |
| cg10784341 | 6  | 143929300 | <i>PHACTR2</i>   | -0.544±0.385 | 0.654±0.423  | 1.04E-04 |
| cg04304130 | 6  | 11111894  | <i>ERVFRD-1</i>  | 1.264±0.257  | 2.146±0.323  | 1.04E-04 |
| cg20073553 | 4  | 13545291  | <i>NKX3-2</i>    | -2.813±0.372 | -0.851±0.73  | 1.04E-04 |
| cg00136405 | 4  | 123542198 | <i>IL21</i>      | 0.244±0.268  | -0.697±0.348 | 1.04E-04 |
| cg04956511 | 12 | 7056008   | <i>PTPN6</i>     | 0.205±0.325  | -0.933±0.422 | 1.05E-04 |
| cg03355526 | 5  | 178368415 | <i>ZNF454</i>    | -1.366±0.526 | 0.249±0.57   | 1.08E-04 |
| cg05373457 | 8  | 99439948  | <i>KCNS2</i>     | -1.758±0.314 | -0.31±0.549  | 1.11E-04 |
| cg01280080 | 2  | 216177276 | <i>ATIC</i>      | -1.509±0.507 | -3.132±0.591 | 1.15E-04 |
| cg26514942 | 2  | 103378506 | <i>TMEM182</i>   | 1.005±0.214  | 1.848±0.323  | 1.21E-04 |
| cg07195577 | 17 | 27052828  | <i>TLCD1</i>     | -1.932±0.542 | -3.834±0.721 | 1.27E-04 |
| cg27553955 | 2  | 42720326  | <i>KCNG3</i>     | -1.652±0.216 | -0.181±0.544 | 1.27E-04 |
| cg14287742 | 1  | 169335773 | <i>NME7</i>      | 1.633±0.418  | 2.827±0.411  | 1.40E-04 |
| cg12865837 | 6  | 100911526 | <i>SIM1</i>      | -2.206±0.257 | -1.371±0.315 | 1.45E-04 |
| cg06088032 | 3  | 50383227  | <i>ZMYND10</i>   | -1.371±0.56  | -3.427±0.796 | 1.45E-04 |
| cg15633390 | 4  | 99851211  | <i>EIF4E</i>     | -1.149±0.531 | -2.631±0.502 | 1.46E-04 |
| cg01009664 | 3  | 129693613 | <i>TRH</i>       | -3.211±0.401 | -0.28±1.088  | 1.47E-04 |
| cg08254089 | 20 | 36933189  | <i>BPI</i>       | -0.167±0.289 | -1.09±0.348  | 1.52E-04 |
| cg10236239 | 2  | 108994514 | <i>SULT1C4</i>   | -1.411±0.368 | 0.003±0.556  | 1.63E-04 |
| cg02806777 | 19 | 46526317  | <i>PGLYRP1</i>   | -0.758±0.47  | 0.804±0.604  | 1.67E-04 |
| cg12758687 | 11 | 113346327 | <i>DRD2</i>      | -2.029±0.432 | -0.631±0.536 | 1.68E-04 |
| cg10486998 | 18 | 74961787  | <i>GALR1</i>     | -3.431±0.606 | -1.003±0.96  | 1.69E-04 |
| cg22658979 | 11 | 102826469 | <i>MMP13</i>     | 2.561±0.399  | 0.734±0.724  | 1.72E-04 |
| cg08118311 | 18 | 76740401  | <i>SALL3</i>     | -3.3±0.613   | -0.753±1.016 | 1.81E-04 |
| cg26626042 | 6  | 32151594  | <i>AGER</i>      | 1.333±0.377  | 2.277±0.21   | 1.85E-04 |
| cg05755779 | 8  | 120079625 | <i>COLEC10</i>   | 1.168±0.29   | 2.319±0.462  | 1.92E-04 |
| cg07084163 | 5  | 36066783  | <i>UGT3A2</i>    | -2.17±0.367  | -0.572±0.641 | 1.93E-04 |
| cg27214774 | 20 | 49253710  | <i>FAM65C</i>    | 0.624±0.287  | 1.691±0.427  | 1.95E-04 |
| cg24921858 | 12 | 12223989  | <i>BCL2L14</i>   | -0.527±0.366 | -1.536±0.361 | 2.04E-04 |
| cg23208152 | 3  | 50383134  | <i>ZMYND10</i>   | -1.912±0.661 | -3.881±0.75  | 2.07E-04 |
| cg23582919 | 16 | 23568380  | <i>EARS2</i>     | -3.428±0.268 | -4.303±0.347 | 2.14E-04 |
| cg04057858 | 8  | 10383763  | <i>PRSS55</i>    | 1.241±0.339  | -0.002±0.503 | 2.15E-04 |
| cg17398613 | 21 | 43919853  | <i>SLC37A1</i>   | 1.871±0.32   | 2.912±0.413  | 2.17E-04 |
| cg10298815 | 1  | 101004474 | <i>GPR88</i>     | -3.886±0.464 | -1.61±0.923  | 2.19E-04 |
| cg11998307 | 17 | 1549434   | <i>SCARF1</i>    | 1.363±0.362  | 2.308±0.318  | 2.19E-04 |
| cg10031456 | 2  | 33661691  | <i>RASGRP3</i>   | 0.432±0.251  | 1.293±0.34   | 2.20E-04 |
| cg14424579 | 2  | 27274309  | <i>AGBL5</i>     | -4.379±0.185 | -5.005±0.251 | 2.20E-04 |
| cg10078415 | 16 | 20775011  | <i>ACSM3</i>     | -1.809±0.451 | -2.95±0.362  | 2.21E-04 |
| cg20881888 | 3  | 50383079  | <i>ZMYND10</i>   | -0.473±0.484 | -2.415±0.793 | 2.21E-04 |
| cg20537629 | 7  | 79083944  | <i>MAGI2-AS3</i> | -2.46±0.265  | -0.936±0.612 | 2.31E-04 |
| cg15988232 | 3  | 47621127  | <i>CSPG5</i>     | -0.442±0.331 | 0.76±0.491   | 2.32E-04 |
| cg01656853 | 19 | 49199172  | <i>FUT2</i>      | -0.401±0.223 | -1.306±0.373 | 2.33E-04 |
| cg12611860 | 11 | 17191617  | <i>PIK3C2A</i>   | 0.702±0.236  | 1.423±0.284  | 2.34E-04 |
| cg23207990 | 4  | 154710535 | <i>SFRP2</i>     | -3.222±0.419 | -0.737±0.997 | 2.35E-04 |
| cg19780563 | 10 | 94594494  | <i>EXOC6</i>     | 1.085±0.282  | 1.931±0.332  | 2.36E-04 |
| cg19352038 | 2  | 223164869 | <i>PAX3</i>      | -1.677±0.359 | -0.011±0.689 | 2.57E-04 |
| cg15227982 | 10 | 104535854 | <i>WBP1L</i>     | -1.713±0.581 | -0.23±0.517  | 2.74E-04 |
| cg15520279 | 2  | 176995088 | <i>HOXD8</i>     | -2.941±0.707 | -0.258±1.118 | 2.74E-04 |
| cg03283569 | 9  | 127963181 | <i>RABEPK</i>    | -2.581±0.244 | -3.474±0.372 | 2.75E-04 |
| cg03811478 | 3  | 137483696 | <i>SOX14</i>     | -1.712±0.259 | -0.621±0.456 | 2.75E-04 |
| cg18081258 | 14 | 21494161  | <i>NDRG2</i>     | -0.931±0.299 | 0.11±0.432   | 2.76E-04 |
| cg17998964 | 11 | 63655903  | <i>MARK2</i>     | -1.524±0.334 | -2.521±0.399 | 2.78E-04 |
| cg14646244 | 7  | 107300287 | <i>SLC26A4</i>   | -0.994±0.321 | -2.461±0.614 | 2.82E-04 |
| cg10481740 | 4  | 1857103   | <i>LETM1</i>     | -3.178±0.209 | -3.85±0.276  | 2.83E-04 |
| cg19456540 | 14 | 60976285  | <i>SIX6</i>      | -4.01±0.498  | -0.712±1.34  | 2.84E-04 |
| cg02161900 | 10 | 28035631  | <i>MKX</i>       | -2.444±0.22  | -0.468±0.779 | 2.84E-04 |
| cg07533148 | 1  | 248020812 | <i>TRIM58</i>    | -4.07±1.021  | -0.292±1.589 | 2.85E-04 |
| cg18410627 | 9  | 129677882 | <i>RALGPS1</i>   | -3.423±0.298 | -4.347±0.377 | 2.86E-04 |
| cg21591742 | 2  | 176980998 | <i>HOXD10</i>    | -2.269±0.365 | -0.438±0.766 | 2.94E-04 |
| cg06491116 | 11 | 118122715 | <i>MPZL3</i>     | -1.687±0.482 | -3.042±0.534 | 3.05E-04 |
| cg26388152 | 17 | 27944453  | <i>CORO6</i>     | -2.022±0.747 | -4.039±0.778 | 3.21E-04 |

|            |    |           |           |              |              |          |
|------------|----|-----------|-----------|--------------|--------------|----------|
| cg23290344 | 8  | 24771466  | NEFM      | -2.999±0.652 | -0.001±1.272 | 3.23E-04 |
| cg06627364 | 2  | 87755088  | LINC00152 | -3.1±0.547   | -4.491±0.505 | 3.29E-04 |
| cg26316946 | 6  | 101846967 | GRIK2     | -2.49±0.449  | -0.437±0.877 | 3.38E-04 |
| cg12699371 | 18 | 74961424  | GALR1     | -3.403±0.435 | -1.204±0.933 | 3.39E-04 |
| cg10082841 | 9  | 130689321 | PIP5KL1   | -1.895±0.378 | -2.805±0.298 | 3.41E-04 |
| cg16431978 | 21 | 31797932  | KRTAP13-3 | 1.148±0.131  | 0.06±0.441   | 3.41E-04 |
| cg08307963 | 1  | 147245485 | GJA5      | -3.378±0.354 | -1.076±0.959 | 3.54E-04 |
| cg14456683 | 3  | 147127010 | ZIC1      | -1.473±0.298 | -0.091±0.594 | 3.60E-04 |
| cg10238818 | 21 | 27945554  | CYYR1     | -3.271±0.645 | -1.109±0.925 | 3.67E-04 |
| cg03679581 | 9  | 5304511   | RLN2      | -0.11±0.242  | -0.969±0.371 | 3.67E-04 |
| cg23710218 | 8  | 72756656  | MSC       | -1.786±0.307 | 0.109±0.8    | 3.68E-04 |
| cg26322315 | 7  | 7758995   | RPA3      | 0.778±0.359  | -0.377±0.493 | 3.68E-04 |
| cg26701826 | 4  | 108814604 | SGMS2     | -0.678±0.281 | 0.575±0.543  | 3.69E-04 |
| cg04726200 | 11 | 2930485   | SLC22A18  | 0.543±0.26   | 1.331±0.33   | 3.69E-04 |
| cg13619408 | 1  | 109756118 | SARS      | -0.424±0.294 | -1.228±0.322 | 3.71E-04 |
| cg25974617 | 8  | 71520962  | LOC286190 | 0.11±0.166   | -0.642±0.325 | 3.71E-04 |
| cg00066816 | 5  | 158758353 | LOC285626 | -1.358±0.34  | -2.248±0.343 | 3.72E-04 |
| cg06123346 | 19 | 36054519  | ATP4A     | 0.164±0.23   | -0.871±0.449 | 3.76E-04 |
| cg05073035 | 3  | 147127193 | ZIC1      | -2.065±0.208 | -0.935±0.485 | 3.84E-04 |
| cg16993794 | 22 | 24199328  | SLC2A11   | -3.608±0.372 | -4.586±0.384 | 3.84E-04 |
| cg20967028 | 12 | 14996272  | ART4      | 1.757±0.172  | 2.419±0.289  | 3.86E-04 |
| cg15129294 | 17 | 34639274  | CCL4L2    | 0.274±0.177  | -0.863±0.483 | 4.00E-04 |
| cg12052765 | 10 | 50816963  | CHAT      | -3.718±0.346 | -1.744±0.849 | 4.08E-04 |
| cg03958979 | 6  | 108486387 | NR2E1     | -1.458±0.426 | 0.398±0.814  | 4.09E-04 |
| cg26555310 | 1  | 68914717  | RPE65     | 1.624±0.4    | 2.568±0.318  | 4.13E-04 |
| cg15607672 | 14 | 57277227  | OTX2      | -1.852±0.306 | -0.363±0.653 | 4.24E-04 |
| cg15105987 | 3  | 181430317 | SOX2      | -1.189±0.233 | -0.346±0.371 | 4.26E-04 |
| cg15998761 | 2  | 191300784 | MFSD6     | 0.981±0.421  | 1.937±0.222  | 4.26E-04 |
| cg11206634 | 2  | 128458399 | SFT2D3    | 1.007±0.227  | -0.107±0.488 | 4.27E-04 |
| cg24496666 | 1  | 78511979  | GIPC2     | -3.667±0.274 | -0.915±1.138 | 4.35E-04 |
| cg19576304 | 18 | 56940022  | RAX       | -2.877±0.346 | -0.947±0.842 | 4.53E-04 |
| cg07651914 | 7  | 100881986 | CLDN15    | 0.899±0.295  | 1.575±0.214  | 4.58E-04 |
| cg15868302 | 1  | 47900327  | FOXO2-AS1 | -0.895±0.343 | 0.434±0.592  | 4.59E-04 |
| cg17267907 | 8  | 6838024   | DEFA1B    | 1.112±0.193  | 0.04±0.469   | 4.64E-04 |
| cg05436658 | 16 | 23847568  | PRKCB     | -4.571±0.498 | -1.305±1.411 | 4.65E-04 |
| cg16812893 | 21 | 31813075  | KRTAP15-1 | 1.508±0.288  | 0.011±0.659  | 4.67E-04 |
| cg15191648 | 18 | 76740262  | SALL3     | -2.288±0.516 | -0.214±0.926 | 4.67E-04 |
| cg26133068 | 22 | 24199008  | SLC2A11   | -1.256±0.268 | -2.371±0.501 | 5.05E-04 |
| cg15089387 | 5  | 110406661 | TSLP      | -1.321±0.456 | -2.708±0.61  | 5.21E-04 |
| cg11965370 | 11 | 131780946 | NTM       | -2.651±0.531 | -0.514±0.964 | 5.23E-04 |
| cg19220586 | 1  | 167522470 | CREG1     | -3.681±0.238 | -4.929±0.556 | 5.25E-04 |
| cg05261299 | 12 | 52437299  | NR4A1     | 1.451±0.455  | 2.767±0.573  | 5.32E-04 |
| cg19345602 | 11 | 125615388 | PATE1     | 0.197±0.23   | -0.856±0.475 | 5.35E-04 |
| cg21614638 | 4  | 100737821 | DAPP1     | 0.1±0.623    | -1.359±0.53  | 5.36E-04 |
| cg08331313 | 5  | 151066460 | SPARC     | -4.999±0.511 | -2.262±1.221 | 5.36E-04 |
| cg00708598 | 13 | 53313895  | LECT1     | -2.108±0.286 | -0.896±0.548 | 5.38E-04 |
| cg22303211 | 13 | 112722171 | SOX1      | -1.197±0.239 | -0.382±0.368 | 5.48E-04 |
| cg17141902 | 9  | 95897216  | NINJ1     | 0.242±0.316  | -0.52±0.294  | 5.58E-04 |
| cg10604646 | 1  | 163172649 | RGS5      | 0.413±0.222  | 1.334±0.423  | 6.21E-04 |
| cg01381846 | 7  | 27204785  | HOXA9     | -1.751±0.303 | 0.491±0.988  | 6.24E-04 |
| cg10636246 | 1  | 159046973 | AIM2      | -0.508±0.639 | -2.2±0.727   | 6.51E-04 |
| cg16612562 | 22 | 29712045  | RASL10A   | 0.777±0.247  | 1.65±0.403   | 6.59E-04 |
| cg24784109 | 6  | 26200116  | HIST1H2BF | -2.58±0.462  | -1.186±0.63  | 6.61E-04 |
| cg20080624 | 7  | 96651111  | DLX5      | -1.129±0.213 | -0.149±0.451 | 6.63E-04 |
| cg12782180 | 7  | 127880932 | LEP       | -0.408±0.408 | 0.91±0.603   | 6.66E-04 |
| cg05050341 | 9  | 130617534 | ENG       | 0.358±0.333  | 1.161±0.322  | 6.70E-04 |
| cg11208483 | 13 | 95364233  | SOX21     | -1.402±0.215 | -0.605±0.369 | 6.70E-04 |
| cg06051311 | 6  | 30131001  | TRIM15    | 0.615±0.421  | -1.169±0.827 | 6.76E-04 |
| cg09837943 | 19 | 57306631  | ZIM2      | 1.129±0.303  | 0.19±0.43    | 6.83E-04 |
| cg02008154 | 7  | 35293537  | TBX20     | -3.049±0.459 | -0.714±1.073 | 6.84E-04 |
| cg20028470 | 2  | 27530829  | UCN       | -0.296±0.175 | 0.34±0.295   | 6.87E-04 |
| cg00055233 | 9  | 5339677   | RLN1      | -0.111±0.257 | -0.987±0.406 | 6.91E-04 |
| cg02919422 | 8  | 55370544  | SOX17     | -1.909±0.433 | -0.256±0.771 | 6.99E-04 |
| cg17518825 | 2  | 46523461  | EPAS1     | -0.394±0.33  | 0.503±0.396  | 7.06E-04 |
| cg08278554 | 15 | 45722919  | C15orf48  | -2.333±0.418 | -3.418±0.468 | 7.12E-04 |
| cg18555440 | 11 | 17741687  | MYOD1     | -2.374±0.505 | -0.508±0.874 | 7.27E-04 |
| cg15645309 | 14 | 75988747  | BATF      | -1.048±0.375 | -2.035±0.411 | 7.30E-04 |
| cg15746620 | 19 | 14785849  | EMR3      | -0.99±0.39   | -1.994±0.434 | 7.38E-04 |
| cg17095936 | 1  | 168250628 | TBX19     | 2.489±0.327  | 3.408±0.416  | 7.62E-04 |

|            |    |           |           |              |              |          |
|------------|----|-----------|-----------|--------------|--------------|----------|
| cg19979773 | 1  | 27702651  | FCN3      | 1.745±0.44   | 2.689±0.299  | 7.83E-04 |
| cg01680823 | 17 | 37822045  | TCAP      | 1.449±0.222  | 0.603±0.399  | 7.84E-04 |
| cg07778029 | 7  | 27205114  | HOXA9     | -3.546±0.29  | -0.739±1.253 | 7.89E-04 |
| cg16869108 | 3  | 10184319  | VHL       | 1.333±0.345  | -0.176±0.712 | 7.95E-04 |
| cg20959866 | 1  | 4714008   | AJAP1     | -3.097±0.385 | -0.798±1.064 | 7.99E-04 |
| cg13804316 | 1  | 28286884  | XKR8      | -3.393±0.245 | -3.964±0.23  | 8.24E-04 |
| cg04947157 | 17 | 76128481  | TMC6      | 0.243±0.471  | -1.227±0.69  | 8.37E-04 |
| cg22398616 | 13 | 53314203  | LECT1     | -0.019±0.217 | 0.76±0.37    | 8.38E-04 |
| cg15664905 | 19 | 44009429  | PHLDB3    | 0.502±0.26   | 1.29±0.368   | 8.45E-04 |
| cg18888403 | 1  | 24152774  | HMGCL     | 2.777±0.362  | 1.384±0.664  | 8.49E-04 |
| cg16478145 | 2  | 188419830 | TFPI      | 0.433±0.238  | 1.477±0.496  | 8.52E-04 |
| cg02245378 | 2  | 223161771 | CCDC140   | -2.425±0.273 | -0.615±0.838 | 8.57E-04 |
| cg25645462 | 16 | 57653702  | GPR56     | 1.812±0.409  | 0.576±0.58   | 8.73E-04 |
| cg03131527 | 3  | 197301250 | BDH1      | -0.628±0.392 | 0.312±0.398  | 8.86E-04 |
| cg10300684 | 14 | 29236323  | FOXG1     | -2.86±0.417  | -0.851±0.956 | 8.91E-04 |
| cg22471346 | 17 | 10101473  | GAS7      | -4.471±0.896 | -1.228±1.556 | 8.95E-04 |
| cg21747271 | 11 | 67250052  | AIP       | -0.237±0.363 | -1.815±0.756 | 8.96E-04 |
| cg13462129 | 7  | 96651281  | DLX5      | -1.322±0.256 | -0.006±0.625 | 8.99E-04 |
| cg04330449 | 5  | 134871166 | NEUROG1   | -2.225±0.532 | -0.225±0.96  | 9.00E-04 |
| cg13323752 | 12 | 8025567   | SLC2A14   | -3.964±0.752 | -1.157±1.35  | 9.05E-04 |
| cg18043280 | 17 | 40996886  | AOC2      | 2.103±0.21   | 3.202±0.522  | 9.09E-04 |
| cg18159180 | 6  | 43022213  | CUL7      | 0.156±0.388  | 1.161±0.454  | 9.32E-04 |
| cg14011639 | 5  | 140797234 | PCDHGB7   | -3.899±0.342 | -2.075±0.869 | 9.32E-04 |
| cg09944526 | 10 | 94594201  | EXOC6     | 0.431±0.295  | 1.452±0.492  | 9.36E-04 |
| cg17181653 | 6  | 144417537 | SF3B5     | 0.83±0.337   | -0.281±0.534 | 9.44E-04 |
| cg26069745 | 7  | 27142200  | HOXA2     | -2.14±0.427  | -0.382±0.851 | 9.55E-04 |
| cg22740835 | 1  | 162602559 | DDR2      | 0.27±0.361   | 1.332±0.505  | 9.70E-04 |
| cg08647446 | 4  | 74486298  | RASSF6    | -2.176±0.283 | -2.997±0.389 | 9.74E-04 |
| cg02586730 | 11 | 65639869  | EFEMP2    | -0.133±0.221 | 0.729±0.419  | 9.80E-04 |
| cg18521771 | 9  | 117373239 | C9orf91   | 1.615±0.186  | 1.07±0.26    | 9.98E-04 |
| cg22858288 | 11 | 2930322   | SLC22A18  | 0.567±0.31   | 1.444±0.415  | 1.01E-03 |
| cg02332525 | 3  | 6903153   | GRM7      | -1.423±0.457 | -0.165±0.591 | 1.02E-03 |
| cg02351381 | 12 | 110172346 | FAM222A   | -1.505±0.305 | -0.071±0.696 | 1.03E-03 |
| cg08251399 | 2  | 31457608  | EHD3      | -0.121±0.239 | 0.668±0.383  | 1.03E-03 |
| cg04598121 | 8  | 57358505  | PENK      | -1.975±0.631 | -0.425±0.694 | 1.08E-03 |
| cg14552982 | 9  | 133568226 | EXOSC2    | -0.154±0.213 | 0.727±0.432  | 1.08E-03 |
| cg16708281 | 2  | 114256673 | FOXD4L1   | -0.656±0.215 | -0.074±0.274 | 1.08E-03 |
| cg09784259 | 1  | 169703422 | SELE      | 0.846±0.306  | 1.847±0.489  | 1.09E-03 |
| cg15760840 | 7  | 27225222  | HOXA11-AS | -4.216±0.329 | -2.097±1.015 | 1.09E-03 |
| cg26963271 | 1  | 66259081  | PDE4B     | -3.729±0.72  | -1.362±1.16  | 1.10E-03 |
| cg01261503 | 17 | 62493599  | POLG2     | -1.67±0.328  | -2.893±0.603 | 1.10E-03 |
| cg11540692 | 6  | 100912072 | SIM1      | -1.785±0.258 | -0.887±0.442 | 1.10E-03 |
| cg09871315 | 7  | 27142682  | HOXA2     | -2.591±0.498 | -0.311±1.117 | 1.10E-03 |
| cg14859460 | 5  | 178422244 | GRM6      | -2.836±0.791 | -0.519±1.119 | 1.11E-03 |
| cg23317501 | 5  | 35991215  | UGT3A1    | -2.879±0.456 | -0.887±0.984 | 1.16E-03 |
| cg24335895 | 19 | 36643771  | COX7A1    | -0.887±0.364 | 0.269±0.569  | 1.18E-03 |
| cg03421687 | 3  | 50383251  | ZMYND10   | -2.834±0.514 | -4.694±0.924 | 1.18E-03 |
| cg15539420 | 17 | 46692248  | HOXB8     | -1.528±0.281 | 0.022±0.758  | 1.18E-03 |
| cg26200585 | 19 | 40919245  | PRX       | -0.073±0.482 | 1.243±0.628  | 1.18E-03 |
| cg06151165 | 20 | 25062254  | VSX1      | -4.369±0.71  | -1.78±1.286  | 1.18E-03 |
| cg15005385 | 17 | 34626054  | CCL3L1    | 0.625±0.232  | -0.594±0.598 | 1.18E-03 |
| cg19466563 | 4  | 88450506  | SPARCL1   | -0.884±0.478 | 0.602±0.732  | 1.19E-03 |
| cg12441928 | 3  | 46249985  | CCR1      | -3.237±0.475 | -4.329±0.475 | 1.19E-03 |
| cg11323198 | 16 | 62069806  | CDH8      | -2.671±0.592 | -0.642±1.009 | 1.21E-03 |
| cg21296230 | 15 | 33010536  | GREM1     | -2.705±0.497 | -0.832±0.936 | 1.24E-03 |
| cg24929834 | 22 | 29457241  | C22orf31  | 0.58±0.287   | 1.343±0.365  | 1.25E-03 |
| cg20249919 | 15 | 102029706 | PCSK6     | -2.444±1.031 | 0.177±1.231  | 1.25E-03 |
| cg14448116 | 1  | 161170110 | NDUFS2    | 1.022±0.268  | 2.058±0.52   | 1.29E-03 |
| cg21902327 | 12 | 4554786   | FGF6      | 1.55±0.312   | 0.297±0.629  | 1.30E-03 |
| cg18722841 | 11 | 71954982  | PHOX2A    | -3.969±0.612 | -1.382±1.299 | 1.31E-03 |
| cg15701111 | 12 | 52685334  | KRT81     | 0.42±0.464   | 1.555±0.527  | 1.32E-03 |
| cg09243021 | 7  | 142985019 | CASP2     | -1.009±0.45  | 0.251±0.618  | 1.33E-03 |
| cg20951444 | 1  | 33337112  | FNDC5     | 1.007±0.255  | -0.182±0.596 | 1.33E-03 |
| cg24199834 | 4  | 147560126 | POU4F2    | -2.763±0.301 | -0.868±0.933 | 1.33E-03 |
| cg17274064 | 21 | 40033892  | ERG       | -1.786±0.385 | -2.836±0.511 | 1.33E-03 |
| cg21233722 | 5  | 169064660 | DOCK2     | -1.708±0.321 | -0.264±0.727 | 1.36E-03 |
| cg17657618 | 1  | 15427654  | KAZN      | 0.168±0.456  | -1.283±0.729 | 1.37E-03 |
| cg20289911 | 20 | 816362    | FAM110A   | -2.003±0.308 | -0.704±0.657 | 1.39E-03 |
| cg01295203 | 8  | 70984199  | PRDM14    | -2.728±0.434 | -0.389±1.171 | 1.40E-03 |

|            |    |           |                  |              |              |          |
|------------|----|-----------|------------------|--------------|--------------|----------|
| cg21164303 | 15 | 79603277  | <i>TMED3</i>     | -5.003±0.311 | -5.83±0.402  | 1.40E-03 |
| cg17217654 | 3  | 49058043  | <i>NDUFAF3</i>   | -3.636±0.31  | -4.509±0.432 | 1.42E-03 |
| cg02920216 | 21 | 19616939  | <i>CHODL</i>     | -2.104±0.272 | -1.034±0.545 | 1.44E-03 |
| cg06445611 | 6  | 90025053  | <i>GABRR2</i>    | 2.247±0.187  | 2.794±0.274  | 1.45E-03 |
| cg10114327 | 4  | 122301573 | <i>QRFPR</i>     | -1.066±0.311 | 0±0.542      | 1.45E-03 |
| cg15343119 | 18 | 74961785  | <i>GALR1</i>     | -3.16±0.449  | -1.112±1.039 | 1.45E-03 |
| cg22074858 | 1  | 89488430  | <i>GBP3</i>      | -2.819±0.342 | -3.866±0.529 | 1.47E-03 |
| cg21165909 | 2  | 211419938 | <i>CPS1</i>      | 1.795±0.144  | 0.926±0.436  | 1.50E-03 |
| cg02868123 | 2  | 79382913  | <i>0</i>         | 2.123±0.231  | 0.751±0.689  | 1.50E-03 |
| cg21460081 | 17 | 46656012  | <i>HOXB4</i>     | -3.767±0.334 | -1.498±1.131 | 1.51E-03 |
| cg07644368 | 5  | 115152785 | <i>CDO1</i>      | -1.607±0.2   | -0.19±0.705  | 1.52E-03 |
| cg16415058 | 10 | 108923781 | <i>SORCS1</i>    | -2.138±0.301 | -0.963±0.603 | 1.52E-03 |
| cg05337441 | 2  | 21266568  | <i>APOB</i>      | -1.355±0.408 | -2.383±0.498 | 1.54E-03 |
| cg10266490 | 1  | 55013709  | <i>ACOT11</i>    | -2.159±0.436 | -0.618±0.791 | 1.54E-03 |
| cg07922606 | 6  | 26225389  | <i>HIST1H3E</i>  | 1.289±0.37   | 2.356±0.537  | 1.55E-03 |
| cg20163033 | 4  | 2627194   | <i>FAM193A</i>   | 1.136±0.327  | 1.818±0.277  | 1.56E-03 |
| cg06092815 | 2  | 229046406 | <i>SPHKAP</i>    | -1.594±0.42  | -0.181±0.727 | 1.59E-03 |
| cg10848367 | 11 | 62009065  | <i>SCGB1D2</i>   | 0.486±0.154  | -0.522±0.507 | 1.59E-03 |
| cg17560332 | 2  | 198651303 | <i>BOLL</i>      | -2.418±0.312 | -0.637±0.904 | 1.60E-03 |
| cg13494498 | 16 | 89990214  | <i>TUBB3</i>     | -2.936±0.213 | -3.517±0.291 | 1.61E-03 |
| cg05023540 | 14 | 96116970  | <i>TCL6</i>      | 1.365±0.213  | 0.587±0.402  | 1.61E-03 |
| cg22134325 | 11 | 66188745  | <i>NPAS4</i>     | -1.169±0.335 | 0.001±0.605  | 1.62E-03 |
| cg12432709 | 18 | 52627333  | <i>CCDC68</i>    | 0.076±0.372  | 1.009±0.457  | 1.71E-03 |
| cg08744726 | 7  | 149323101 | <i>ZNF767</i>    | -0.491±0.292 | -1.238±0.369 | 1.71E-03 |
| cg01242619 | 8  | 145049472 | <i>PLEC</i>      | -1.967±0.355 | -2.898±0.466 | 1.76E-03 |
| cg05508084 | 19 | 56988398  | <i>ZNF667</i>    | -2.84±0.507  | -1.206±0.849 | 1.77E-03 |
| cg24355048 | 14 | 25045028  | <i>CTSG</i>      | 0.847±0.306  | -0.33±0.615  | 1.79E-03 |
| cg03297731 | 16 | 30124293  | <i>GDPD3</i>     | 0.39±0.207   | -0.557±0.493 | 1.79E-03 |
| cg00201234 | 3  | 13590968  | <i>FBLN2</i>     | -2.346±0.242 | -0.836±0.773 | 1.80E-03 |
| cg22994720 | 11 | 74441988  | <i>CHRD12</i>    | -3.294±0.313 | -1.305±1.02  | 1.80E-03 |
| cg12447832 | 2  | 3383257   | <i>TRAPPC12</i>  | -0.44±0.366  | -1.501±0.546 | 1.80E-03 |
| cg10432620 | 16 | 74808963  | <i>FA2H</i>      | -4.103±0.239 | -4.78±0.347  | 1.80E-03 |
| cg06194808 | 7  | 1596217   | <i>TMEM184A</i>  | 1.393±0.405  | -0.303±0.888 | 1.80E-03 |
| cg24407065 | 1  | 169335802 | <i>NME7</i>      | 1.69±0.442   | 2.645±0.427  | 1.80E-03 |
| cg13870494 | 9  | 72658358  | <i>MAMDC2</i>    | -0.921±0.369 | 0.34±0.66    | 1.80E-03 |
| cg26147480 | 10 | 126490099 | <i>FAM175B</i>   | 2.422±0.302  | 1.438±0.514  | 1.80E-03 |
| cg14262937 | 6  | 154360351 | <i>OPRM1</i>     | -3.194±0.413 | -1.416±0.929 | 1.80E-03 |
| cg08411049 | 18 | 61144250  | <i>SERPINB5</i>  | 2.077±0.626  | 0.279±0.923  | 1.81E-03 |
| cg05964373 | 15 | 56657478  | <i>TEX9</i>      | -4.492±0.215 | -5.14±0.336  | 1.82E-03 |
| cg21410991 | 5  | 50678451  | <i>ISL1</i>      | -2.684±0.49  | -0.931±0.922 | 1.85E-03 |
| cg00629217 | 4  | 54425349  | <i>LNK1</i>      | 1.212±0.281  | 1.926±0.357  | 1.85E-03 |
| cg20903926 | 1  | 55271677  | <i>C1orf177</i>  | 1.881±0.466  | 3.101±0.618  | 1.86E-03 |
| cg19404582 | 9  | 140032953 | <i>GRIN1</i>     | -1.413±0.232 | -0.477±0.493 | 1.88E-03 |
| cg05159188 | 6  | 26240579  | <i>HIST1H4F</i>  | -3.454±0.421 | -1.743±0.901 | 1.88E-03 |
| cg07014174 | 21 | 32253760  | <i>KRTAP11-1</i> | 1.493±0.267  | -0.22±0.885  | 1.90E-03 |
| cg10217445 | 21 | 34397784  | <i>OLIG2</i>     | -2.849±0.383 | -1.199±0.869 | 1.90E-03 |
| cg01806928 | 11 | 7272804   | <i>SYT9</i>      | -1.684±0.362 | -0.668±0.526 | 1.93E-03 |
| cg14544583 | 11 | 5248566   | <i>HBB</i>       | 1.616±0.286  | 0.551±0.564  | 1.94E-03 |
| cg27504991 | 6  | 43022209  | <i>CUL7</i>      | 1.505±0.451  | 2.635±0.567  | 1.94E-03 |
| cg23752985 | 2  | 85803571  | <i>VAMP8</i>     | 0.813±0.485  | 1.988±0.581  | 1.94E-03 |
| cg00221494 | 13 | 98794593  | <i>FARP1</i>     | -1.765±0.441 | -2.972±0.625 | 2.00E-03 |
| cg14196790 | 5  | 131705035 | <i>SLC22A5</i>   | -2.236±0.384 | -3.091±0.403 | 2.00E-03 |
| cg13641903 | 11 | 32452608  | <i>WT1</i>       | 0.229±0.224  | 0.893±0.348  | 2.01E-03 |
| cg04301614 | 4  | 37585993  | <i>C4orf19</i>   | -0.349±0.321 | -1.355±0.532 | 2.02E-03 |
| cg12768605 | 19 | 44324951  | <i>LYPD5</i>     | -3.206±0.545 | -1.091±1.13  | 2.05E-03 |
| cg25659818 | 17 | 34431747  | <i>CCL4</i>      | 1.528±0.204  | 0.195±0.696  | 2.05E-03 |
| cg06958537 | 21 | 40176950  | <i>ETS2</i>      | -1.541±0.366 | -2.462±0.468 | 2.05E-03 |
| cg10186456 | 16 | 2892912   | <i>PRSS30P</i>   | 0.351±0.18   | 1.264±0.483  | 2.06E-03 |
| cg18087477 | 1  | 115397597 | <i>SYCP1</i>     | -0.255±0.408 | 0.607±0.389  | 2.06E-03 |
| cg14467840 | 1  | 153600972 | <i>S100A1</i>    | 2.981±0.29   | 1.954±0.548  | 2.06E-03 |
| cg25356886 | 2  | 208988967 | <i>CRYGD</i>     | -0.032±0.19  | 0.572±0.321  | 2.06E-03 |
| cg17923358 | 7  | 103629618 | <i>RELN</i>      | -3.188±0.446 | -1.315±0.998 | 2.06E-03 |
| cg02196730 | 15 | 80188777  | <i>MTNFS</i>     | -2.479±0.519 | -3.453±0.275 | 2.06E-03 |
| cg05790038 | 17 | 3461143   | <i>TRPV3</i>     | 0.929±0.468  | -0.019±0.4   | 2.07E-03 |
| cg17827767 | 10 | 86001154  | <i>LRIT1</i>     | 1.589±0.271  | 0.321±0.675  | 2.09E-03 |
| cg20312687 | 20 | 29956585  | <i>DEFB118</i>   | 1.362±0.103  | 0.084±0.653  | 2.09E-03 |
| cg11525285 | 14 | 74706336  | <i>VX2</i>       | -2.819±0.357 | -1.108±0.91  | 2.09E-03 |
| cg04322134 | 9  | 34328884  | <i>KIF24</i>     | -3.911±0.257 | -4.741±0.442 | 2.09E-03 |
| cg04720330 | 11 | 2949813   | <i>PHLDA2</i>    | -2.203±0.359 | -3.136±0.483 | 2.17E-03 |

|            |    |           |            |              |              |          |
|------------|----|-----------|------------|--------------|--------------|----------|
| cg27041096 | 8  | 120079173 | COLEC10    | 0.523±0.27   | 1.329±0.429  | 2.18E-03 |
| cg27223047 | 5  | 127874825 | FBN2       | -1.737±0.348 | -0.245±0.801 | 2.18E-03 |
| cg14785479 | 22 | 20792535  | SCARF2     | -3.687±0.576 | -1.539±1.158 | 2.20E-03 |
| cg23587449 | 4  | 155663689 | LRAT       | -3.289±0.413 | -1.586±0.917 | 2.20E-03 |
| cg00411097 | 7  | 1596050   | TMEM184A   | -0.064±0.296 | -0.903±0.444 | 2.20E-03 |
| cg07703401 | 16 | 230341    | HBQ1       | -3.468±0.708 | -1.011±1.324 | 2.21E-03 |
| cg22187630 | 19 | 13616871  | CACNA1A    | -2.932±0.435 | -0.862±1.109 | 2.21E-03 |
| cg23855392 | 15 | 80189782  | MTHFS      | -2.909±0.546 | -3.95±0.39   | 2.25E-03 |
| cg23213217 | 1  | 224370155 | DEGS1      | 0.288±0.51   | -1.189±0.787 | 2.25E-03 |
| cg04106190 | 7  | 120964168 | WNT16      | 0.322±0.162  | 1.057±0.396  | 2.27E-03 |
| cg06498267 | 5  | 45695922  | HCN1       | -2.236±0.543 | -0.563±0.899 | 2.28E-03 |
| cg24432073 | 4  | 76555634  | CDKL2      | -4.051±0.432 | -4.936±0.396 | 2.30E-03 |
| cg19368582 | 10 | 88716646  | MMRN2      | 0.08±0.238   | 0.703±0.326  | 2.30E-03 |
| cg13791131 | 11 | 2161892   | IGF2-AS    | -2.592±0.5   | -0.756±0.998 | 2.32E-03 |
| cg06540636 | 19 | 44174071  | PLAUR      | -3.754±0.254 | -4.463±0.377 | 2.32E-03 |
| cg00503840 | 7  | 96650509  | DLX5       | -0.15±0.125  | 0.516±0.358  | 2.33E-03 |
| cg15699524 | 5  | 170845610 | FGF18      | 0.613±0.227  | -0.2±0.442   | 2.33E-03 |
| cg20644981 | 4  | 152020400 | RPS3A      | -2.269±0.407 | -3.472±0.646 | 2.34E-03 |
| cg04534765 | 18 | 74962369  | GALR1      | -2.95±0.8    | -0.259±1.464 | 2.38E-03 |
| cg14277764 | 5  | 70671764  | PMCHL2     | 0.872±0.185  | 0.132±0.403  | 2.38E-03 |
| cg18818531 | 11 | 65668277  | FOSL1      | -0.648±0.362 | -1.705±0.57  | 2.43E-03 |
| cg19103609 | 19 | 14543524  | PKN1       | 0.835±0.267  | -0.129±0.527 | 2.43E-03 |
| cg07403255 | 2  | 114036170 | PAX8       | 0.286±0.229  | 0.908±0.332  | 2.47E-03 |
| cg09924998 | 12 | 122751933 | VPS33A     | -0.261±0.334 | -1.219±0.517 | 2.48E-03 |
| cg24176563 | 6  | 133562776 | EYA4       | -3.152±0.676 | -1.012±1.166 | 2.49E-03 |
| cg12564453 | 16 | 56995840  | CETP       | 0.931±0.351  | 1.877±0.506  | 2.51E-03 |
| cg25943276 | 11 | 131533284 | NTM        | 2.51±0.278   | 1.115±0.759  | 2.52E-03 |
| cg09643544 | 19 | 9473696   | ZNF177     | -2.25±0.377  | -0.52±0.947  | 2.58E-03 |
| cg11657808 | 1  | 237205950 | RYR2       | -3.803±0.58  | -1.18±1.438  | 2.58E-03 |
| cg12457773 | 6  | 24126497  | NRSN1      | -2.212±0.476 | -0.851±0.738 | 2.60E-03 |
| cg21418052 | 13 | 31773806  | B3GALT     | -0.522±0.239 | -1.138±0.328 | 2.62E-03 |
| cg13255190 | 12 | 4829286   | GALNT8     | 0.669±0.23   | -0.059±0.4   | 2.64E-03 |
| cg14902389 | 2  | 99342685  | MGAT4A     | 1.158±0.318  | 1.996±0.449  | 2.64E-03 |
| cg20792062 | 12 | 5153288   | KCNA5      | -2.076±0.631 | -0.514±0.823 | 2.69E-03 |
| cg18183281 | 7  | 130132505 | MEST       | 1.111±0.185  | 1.68±0.313   | 2.72E-03 |
| cg07480567 | 17 | 13505174  | HS3ST3A1   | -3.59±0.498  | -1.364±1.23  | 2.73E-03 |
| cg18729973 | 21 | 43785785  | TFF1       | 1.594±0.072  | 0.616±0.52   | 2.74E-03 |
| cg18952647 | 15 | 83953744  | BNC1       | -3.854±0.602 | -0.806±1.677 | 2.75E-03 |
| cg03289872 | 19 | 56989102  | ZNF667-AS1 | -3.705±0.569 | -1.415±1.273 | 2.83E-03 |
| cg17166338 | 5  | 1295969   | TERT       | 0.72±0.36    | 1.677±0.519  | 2.88E-03 |
| cg15448245 | 22 | 24641654  | GGT5       | -0.36±0.244  | 0.302±0.361  | 2.88E-03 |
| cg21245652 | 2  | 95691051  | MAL        | -1.495±0.151 | -0.376±0.61  | 2.92E-03 |
| cg03934354 | 5  | 34043140  | C1QTNF3    | 1.031±0.33   | 1.776±0.381  | 2.94E-03 |
| cg06722633 | 1  | 37499309  | GRIK3      | -2.704±0.529 | -0.769±1.082 | 2.94E-03 |
| cg16280667 | 11 | 118754593 | CXCR5      | 2.554±0.406  | 1.247±0.728  | 2.94E-03 |
| cg21414251 | 6  | 29364554  | OR12D2     | 0.506±0.303  | -0.749±0.701 | 2.96E-03 |
| cg06204948 | 11 | 63656090  | MARK2      | -0.815±0.26  | -1.803±0.555 | 3.06E-03 |
| cg17399166 | 1  | 158149795 | CD1D       | 2.121±0.316  | 0.53±0.887   | 3.08E-03 |
| cg00970325 | 3  | 142683176 | PAQR9      | -3.328±0.423 | -1.626±0.956 | 3.08E-03 |
| cg10207745 | 12 | 13529963  | C12orf36   | 0.535±0.457  | -0.641±0.639 | 3.08E-03 |
| cg26609631 | 13 | 28366814  | GSX1       | -2.153±0.637 | -0.322±1.018 | 3.13E-03 |
| cg26162582 | 12 | 4918391   | KCNA6      | -3.523±0.779 | -0.999±1.418 | 3.14E-03 |
| cg02764897 | 21 | 31768311  | KRTAP13-1  | 0.822±0.204  | -0.55±0.759  | 3.15E-03 |
| cg07054641 | 3  | 113160554 | WDR52      | -0.472±0.307 | 0.388±0.477  | 3.16E-03 |
| cg24670715 | 8  | 6420506   | ANGPT2     | -0.067±0.393 | 0.801±0.446  | 3.16E-03 |
| cg06817917 | 10 | 88515527  | BMPR1A     | -3.676±0.309 | -4.223±0.164 | 3.20E-03 |
| cg25691167 | 7  | 19184961  | FERD3L     | -3.76±0.673  | -1.244±1.426 | 3.29E-03 |
| cg25894551 | 11 | 117699851 | FXYD2      | 1.294±0.267  | 0.515±0.436  | 3.30E-03 |
| cg02131853 | 4  | 39034637  | TMEM156    | -0.18±0.373  | -1.148±0.532 | 3.31E-03 |
| cg15606663 | 21 | 31812603  | KRTAP15-1  | 0.949±0.193  | -0.248±0.669 | 3.35E-03 |
| cg21269934 | 4  | 2060219   | NAT8L      | -3.682±0.579 | -1.199±1.411 | 3.41E-03 |
| cg12238343 | 5  | 33936402  | RXFP3      | -4.346±0.495 | -2.053±1.299 | 3.41E-03 |
| cg15279364 | 7  | 98466963  | TMEM130    | -2.717±0.338 | -1.353±0.777 | 3.43E-03 |
| cg26050734 | 1  | 151689032 | CELF3      | -0.898±0.195 | -0.126±0.44  | 3.45E-03 |
| cg24215443 | 6  | 134210598 | TCF21      | -1.366±0.181 | -0.358±0.569 | 3.45E-03 |
| cg06910100 | 19 | 17375091  | USHBP1     | 1.238±0.333  | 2.147±0.508  | 3.45E-03 |
| cg03027037 | 20 | 23402404  | NAPB       | -3.922±0.265 | -4.454±0.257 | 3.45E-03 |
| cg26789453 | 12 | 112452424 | ERP29      | 0.401±0.487  | -0.954±0.76  | 3.45E-03 |
| cg10124201 | 2  | 198650752 | BOLL       | -0.311±0.173 | 0.283±0.339  | 3.45E-03 |

|            |    |           |            |              |              |          |
|------------|----|-----------|------------|--------------|--------------|----------|
| cg15177359 | 17 | 73840750  | UNC13D     | -1.3±0.226   | -1.922±0.349 | 3.52E-03 |
| cg05615150 | 3  | 35683815  | ARPP21     | 1.979±0.402  | 0.655±0.756  | 3.53E-03 |
| cg24130010 | 21 | 19617176  | CHODL      | -2.079±0.453 | -0.316±1.01  | 3.54E-03 |
| cg23509869 | 6  | 31553441  | LST1       | -0.484±0.216 | -1.224±0.424 | 3.55E-03 |
| cg08832227 | 12 | 5020693   | KCNA1      | -1.317±0.404 | 0.301±0.927  | 3.55E-03 |
| cg25511429 | 6  | 6008125   | NRN1       | -2.421±0.153 | -0.756±0.923 | 3.56E-03 |
| cg19836199 | 21 | 36421941  | RUNX1      | -0.462±0.492 | -1.724±0.702 | 3.57E-03 |
| cg03909500 | 5  | 33936597  | RXFP3      | -3.701±0.428 | -1.805±1.085 | 3.58E-03 |
| cg02994974 | 11 | 13984544  | SPON1      | -3.333±0.524 | -1.375±1.124 | 3.58E-03 |
| cg18674980 | 8  | 86350581  | CA3        | -3.73±0.409  | -1.24±1.408  | 3.58E-03 |
| cg03634234 | 7  | 152132218 | KMT2C      | -3.74±0.307  | -2.072±0.947 | 3.58E-03 |
| cg26309134 | 19 | 56879571  | ZNF542     | -4.334±0.652 | -1.157±1.815 | 3.59E-03 |
| cg00888007 | 12 | 4382184   | CCND2      | -5.058±0.306 | -2.113±1.644 | 3.63E-03 |
| cg24240626 | 2  | 79386720  | REG3A      | 0.688±0.236  | -0.445±0.649 | 3.63E-03 |
| cg18270343 | 8  | 143748005 | JRK        | 0.684±0.367  | 1.843±0.664  | 3.64E-03 |
| cg03381111 | 15 | 25296571  | SNORD116-1 | 0.665±0.199  | -0.07±0.424  | 3.64E-03 |
| cg27626299 | 7  | 27282431  | EVX1       | -2.978±0.434 | -0.997±1.137 | 3.64E-03 |
| cg12003230 | 21 | 44899139  | LINC00313  | 1.045±0.338  | 1.913±0.485  | 3.67E-03 |
| cg03802191 | 1  | 234615169 | TARBP1     | 0.746±0.18   | -0.21±0.547  | 3.67E-03 |
| cg08260959 | 6  | 26240920  | HIST1H4F   | -3.636±0.377 | -1.287±1.334 | 3.68E-03 |
| cg19988449 | 15 | 83952808  | BNC1       | -2.871±0.323 | -0.758±1.199 | 3.71E-03 |
| cg18338293 | 11 | 66277283  | BBS1       | 1.809±0.252  | 2.379±0.306  | 3.74E-03 |
| cg12354377 | 10 | 62149557  | ANK3       | 1.357±0.475  | 2.228±0.372  | 3.75E-03 |
| cg07442479 | 5  | 37839769  | GDNF       | -2.131±0.49  | -0.571±0.899 | 3.75E-03 |
| cg05859264 | 6  | 36097692  | MAPK13     | 0.081±0.354  | -1.078±0.671 | 3.83E-03 |
| cg08477744 | 1  | 17308032  | MAFAP2     | 2.822±0.167  | 1.669±0.657  | 3.88E-03 |
| cg15739437 | 5  | 110407538 | TSLP       | -0.441±0.347 | -1.493±0.607 | 3.89E-03 |
| cg15842276 | 11 | 92702648  | MTNR1B     | -0.481±0.647 | 0.758±0.584  | 3.93E-03 |
| cg15446391 | 11 | 32452370  | WT1        | -0.652±0.299 | 0.253±0.523  | 3.94E-03 |
| cg21115990 | 11 | 68079081  | LRP5       | 0.626±0.258  | 1.463±0.485  | 3.94E-03 |
| cg18750960 | 2  | 177016417 | HOXD4      | -2.829±0.386 | -0.938±1.095 | 3.95E-03 |
| cg17963840 | 8  | 26722861  | ADRA1A     | -1.781±0.286 | -0.711±0.623 | 3.97E-03 |
| cg00466249 | 17 | 79269884  | SLC38A10   | 0.032±0.279  | -0.937±0.566 | 4.06E-03 |
| cg15974062 | 12 | 6833012   | COP57A     | -4.305±0.289 | -4.96±0.357  | 4.07E-03 |
| cg14056644 | 4  | 111559105 | PITX2      | -1.654±0.331 | -0.01±0.955  | 4.08E-03 |
| cg25778479 | 7  | 16686771  | BZW2       | -0.76±0.41   | -1.95±0.691  | 4.16E-03 |
| cg08514736 | 5  | 54529368  | CCNO       | -4.444±0.291 | -5.039±0.306 | 4.17E-03 |
| cg16592658 | 19 | 4229887   | EBI3       | 0.597±0.389  | -0.541±0.661 | 4.17E-03 |
| cg13246269 | 9  | 33403037  | AQP7       | 0.431±0.095  | 0.029±0.235  | 4.18E-03 |
| cg07307078 | 18 | 12307630  | TUBB6      | -3.272±0.415 | -0.522±1.588 | 4.23E-03 |
| cg27000831 | 17 | 32645748  | CCL8       | 1.156±0.297  | -0.099±0.737 | 4.24E-03 |
| cg00948500 | 21 | 32006706  | KRTAP20-2  | 0.356±0.271  | -0.703±0.622 | 4.24E-03 |
| cg13266292 | 19 | 1438084   | RPS15      | -1.496±0.162 | -2.407±0.53  | 4.26E-03 |
| cg27188703 | 12 | 50297581  | FAIM2      | -1.765±0.38  | 0.071±1.075  | 4.26E-03 |
| cg16428251 | 3  | 137483479 | SOX14      | -2.725±0.623 | -1.118±0.919 | 4.26E-03 |
| cg00718513 | 2  | 89215272  | 0          | 0.185±0.563  | -1.147±0.746 | 4.31E-03 |
| cg20291049 | 2  | 105472217 | POU3F3     | -1.843±0.368 | 0.048±1.108  | 4.34E-03 |
| cg15046693 | 19 | 33863876  | CEBPG      | 0.521±0.365  | -0.562±0.633 | 4.35E-03 |
| cg25388528 | 21 | 31987978  | KRTAP20-1  | 0.962±0.192  | -0.203±0.679 | 4.35E-03 |
| cg13929328 | 10 | 129535898 | FOXI2      | -1.97±0.568  | -0.523±0.829 | 4.35E-03 |
| cg19789466 | 12 | 113344923 | OAS1       | -3.064±0.451 | -4.127±0.596 | 4.36E-03 |
| cg11761535 | 3  | 149051031 | TM4SF18    | 0.655±0.243  | 1.468±0.48   | 4.36E-03 |
| cg26986236 | 19 | 34855715  | GPI        | -2.576±0.216 | -3.324±0.441 | 4.36E-03 |
| cg14254419 | 1  | 110162217 | AMPD2      | -2.969±0.448 | -3.888±0.48  | 4.37E-03 |
| cg00512031 | 4  | 5021976   | CYTL1      | 1.357±0.248  | 1.948±0.332  | 4.38E-03 |
| cg27549944 | 1  | 204328843 | PLEKHA6    | -2.524±0.192 | -0.641±1.084 | 4.39E-03 |
| cg07958192 | 4  | 90033974  | TIGD2      | -0.283±0.209 | 0.338±0.364  | 4.41E-03 |
| cg02793099 | 19 | 57350004  | PEG3       | 0.195±0.149  | 0.999±0.472  | 4.41E-03 |
| cg25593948 | 6  | 50786670  | TFAP2B     | -2.341±0.314 | -1.146±0.708 | 4.42E-03 |
| cg04901273 | 17 | 34503359  | TBC1D3B    | 1.149±0.14   | 0.493±0.387  | 4.42E-03 |
| cg02255732 | 11 | 31150189  | 0          | 0.743±0.189  | -0.141±0.521 | 4.43E-03 |
| cg27067618 | 19 | 15751949  | CYP4F3     | -0.837±0.35  | -1.745±0.524 | 4.44E-03 |
| cg19358493 | 10 | 119300942 | EMX2       | -3.491±0.388 | -1.643±1.091 | 4.44E-03 |
| cg16826286 | 17 | 34266290  | LYZL6      | 1.031±0.195  | 0.267±0.453  | 4.45E-03 |
| cg14614211 | 10 | 28034247  | MKX        | -2.621±0.513 | -0.97±0.977  | 4.46E-03 |
| cg19343464 | 11 | 105481509 | GRIA4      | -3.809±0.493 | -1.233±1.518 | 4.46E-03 |
| cg19797376 | 1  | 47695475  | TAL1       | -2.261±0.304 | -0.876±0.82  | 4.46E-03 |
| cg03112433 | 7  | 90338555  | CDK14      | 0.326±0.341  | -1.117±0.856 | 4.47E-03 |
| cg12127282 | 2  | 177014685 | MIR10B     | -1.736±0.386 | -0.015±1.022 | 4.54E-03 |

|            |    |           |           |              |              |          |
|------------|----|-----------|-----------|--------------|--------------|----------|
| cg04062391 | 19 | 9609204   | ZNF560    | -2.99±0.397  | -1.296±1.006 | 4.54E-03 |
| cg12266049 | 11 | 69461334  | CCND1     | 3.074±0.507  | 4.097±0.533  | 4.54E-03 |
| cg18967533 | 19 | 51472725  | KLK6      | 1.119±0.241  | 0.102±0.605  | 4.57E-03 |
| cg10303487 | 8  | 105479058 | DPYS      | -2.883±0.711 | -0.377±1.494 | 4.59E-03 |
| cg15062535 | 19 | 52847933  | ZNF610    | 2.164±0.307  | 0.881±0.764  | 4.59E-03 |
| cg13234863 | 12 | 130389138 | TMEM132D  | -2.395±0.494 | -0.914±0.877 | 4.60E-03 |
| cg02162069 | 19 | 57352134  | ZIM2      | 0.917±0.139  | 1.523±0.361  | 4.61E-03 |
| cg21243096 | 1  | 38511557  | POU3F1    | -3.082±0.727 | -0.933±1.273 | 4.63E-03 |
| cg12128017 | 1  | 38230769  | EPHA10    | -3.462±0.597 | -1.413±1.223 | 4.63E-03 |
| cg17906786 | 13 | 37247708  | SERTM1    | -1.362±0.329 | -0.665±0.377 | 4.64E-03 |
| cg25564800 | 3  | 122234134 | KPNA1     | -2.852±0.355 | -3.609±0.414 | 4.79E-03 |
| cg04915566 | 21 | 36421472  | RUNX1     | 0.306±0.513  | -1.152±0.864 | 4.81E-03 |
| cg12493906 | 11 | 5009311   | MMP26     | 1.949±0.228  | 0.416±0.905  | 4.81E-03 |
| cg14294758 | 3  | 116163694 | LSAMP     | -3.225±0.287 | -1.718±0.899 | 4.83E-03 |
| cg02833180 | 2  | 198815064 | PLCL1     | 2.16±0.183   | 1.008±0.683  | 4.83E-03 |
| cg04958389 | 0  | 0         | 0         | 1.398±0.241  | 0.361±0.622  | 4.84E-03 |
| cg23350580 | 17 | 34592075  | TBC1D3C   | 1.519±0.148  | 0.769±0.447  | 4.84E-03 |
| cg26738880 | 7  | 154429032 | DPP6      | 1.393±0.37   | 0.06±0.802   | 4.84E-03 |
| cg26721264 | 18 | 74961727  | GALR1     | -3.862±0.614 | -1.248±1.568 | 4.84E-03 |
| cg13897627 | 16 | 49378497  | 0         | 1.776±0.26   | 0.585±0.713  | 4.84E-03 |
| cg16422907 | 13 | 37006734  | CCNA1     | -2.302±0.242 | -0.984±0.787 | 4.87E-03 |
| cg04348872 | 2  | 25141696  | ADCY3     | 2.773±0.25   | 3.209±0.185  | 4.87E-03 |
| cg10409560 | 4  | 76481299  | C4orf26   | 2.214±0.392  | 0.744±0.885  | 4.87E-03 |
| cg25483003 | 9  | 139948856 | ENTPD2    | -1.344±0.476 | -2.325±0.529 | 4.94E-03 |
| cg03775422 | 7  | 54610192  | VSTM2A    | -3.815±0.427 | -1.932±1.133 | 4.94E-03 |
| cg06409153 | 17 | 67323953  | ABCA5     | -1.873±0.294 | -2.757±0.53  | 4.95E-03 |
| cg23563234 | 5  | 140797286 | PCDHGB7   | -2.511±0.279 | -1.096±0.848 | 4.95E-03 |
| cg23018448 | 19 | 10811855  | QTRT1     | -0.773±0.148 | -1.627±0.509 | 4.95E-03 |
| cg13676215 | 7  | 17337976  | AHR       | -0.441±0.254 | -1.365±0.557 | 4.95E-03 |
| cg20050826 | 12 | 52995295  | KRT72     | -1.717±0.567 | -0.398±0.756 | 4.97E-03 |
| cg22709192 | 12 | 54366909  | HOXC11    | -1.877±0.391 | -0.24±0.988  | 4.98E-03 |
| cg14958635 | 5  | 134870977 | NEUROG1   | -3.013±0.628 | -0.879±1.289 | 4.99E-03 |
| cg24719984 | 12 | 82153464  | PPFIA2    | -2.478±0.394 | -1.11±0.826  | 5.01E-03 |
| cg21513553 | 21 | 47518637  | COL6A2    | -3.848±0.624 | -1.39±1.486  | 5.01E-03 |
| cg20822579 | 14 | 24809073  | RIPK3     | -2.396±0.525 | -3.462±0.573 | 5.01E-03 |
| cg26511321 | 7  | 27196790  | HOXA7     | -1.083±0.245 | 0.154±0.744  | 5.03E-03 |
| cg19502744 | 2  | 31805915  | SRD5A2    | -1.831±0.48  | -0.538±0.769 | 5.03E-03 |
| cg04415689 | 2  | 242128250 | ANO7      | 2.36±0.276   | 1.222±0.69   | 5.14E-03 |
| cg08089301 | 17 | 46655561  | HOXB4     | -3.624±0.804 | -0.431±1.94  | 5.21E-03 |
| cg13348944 | 11 | 118047121 | SCN2B     | -1.238±0.329 | -0.288±0.572 | 5.21E-03 |
| cg16879596 | 7  | 99277978  | CYP3A5    | 1.567±0.255  | 0.78±0.477   | 5.21E-03 |
| cg06850526 | 17 | 79269886  | SLC38A10  | 0.074±0.385  | -1.097±0.708 | 5.22E-03 |
| cg01348086 | 5  | 176785296 | RGS14     | 0.255±0.363  | -0.731±0.59  | 5.22E-03 |
| cg07218880 | 13 | 115046279 | UPF3A     | -0.864±0.315 | -1.894±0.625 | 5.23E-03 |
| cg09936561 | 4  | 9783623   | DRD5      | -2.054±0.369 | -0.778±0.776 | 5.24E-03 |
| cg22941086 | 12 | 40019883  | C12orf40  | 1.418±0.279  | 2.203±0.472  | 5.24E-03 |
| cg00534274 | 4  | 139163341 | SLC7A11   | -1.08±0.385  | -1.973±0.518 | 5.33E-03 |
| cg21541083 | 19 | 7701212   | STXBP2    | 1.71±0.402   | 2.446±0.361  | 5.34E-03 |
| cg15852891 | 5  | 76934946  | OTP       | -4.511±0.527 | -2.136±1.447 | 5.37E-03 |
| cg20645065 | 1  | 21836138  | ALPL      | -3.798±0.489 | -1.537±1.379 | 5.43E-03 |
| cg18335068 | 19 | 53757910  | ZNF677    | -3.987±0.377 | -1.663±1.406 | 5.45E-03 |
| cg20103758 | 5  | 128300696 | SLC27A6   | -2.732±0.186 | -1.42±0.791  | 5.50E-03 |
| cg26656135 | 6  | 133562774 | EYA4      | -4.155±0.729 | -1.519±1.616 | 5.52E-03 |
| cg02164046 | 3  | 187388148 | SST       | -2.918±0.644 | -0.951±1.199 | 5.52E-03 |
| cg14356550 | 1  | 18808102  | KLHDC7A   | 0.018±0.218  | -0.727±0.457 | 5.60E-03 |
| cg00495491 | 12 | 26822813  | ITPR2     | 1.356±0.094  | 0.956±0.246  | 5.61E-03 |
| cg17347253 | 7  | 130130288 | MESTIT1   | -0.278±0.287 | 0.413±0.408  | 5.61E-03 |
| cg23316360 | 13 | 78492916  | EDNRB     | -2.939±0.562 | -1.064±1.151 | 5.62E-03 |
| cg04514469 | 14 | 95942666  | SYNE3     | 1.916±0.184  | 1.016±0.55   | 5.62E-03 |
| cg22346765 | 6  | 41007522  | UNC5CL    | 1.525±0.27   | 0.065±0.891  | 5.64E-03 |
| cg26590537 | 12 | 5020202   | KCNA1     | -3.845±0.323 | -2.151±1.035 | 5.64E-03 |
| cg06771126 | 4  | 57547699  | HOPX      | -1.125±0.319 | -2.142±0.624 | 5.65E-03 |
| cg27011193 | 2  | 91848204  | LOC654342 | -1.241±0.299 | -0.543±0.409 | 5.65E-03 |
| cg06675478 | 13 | 112721786 | SOX1      | -1.058±0.395 | -0.136±0.542 | 5.68E-03 |
| cg02844545 | 6  | 10882043  | GCM2      | -1.375±0.329 | 0.03±0.864   | 5.68E-03 |
| cg21129531 | 7  | 127670703 | LRRC4     | 1.113±0.384  | 2.256±0.7    | 5.71E-03 |
| cg05482722 | 13 | 52598175  | UTP14C    | 2.888±0.309  | 3.397±0.193  | 5.77E-03 |
| cg00325491 | 11 | 93286170  | 0         | 1.338±0.35   | 0.069±0.784  | 5.78E-03 |
| cg17357062 | 9  | 137810348 | FCN1      | 1.574±0.275  | 0.317±0.775  | 5.78E-03 |

|            |    |           |           |              |              |          |
|------------|----|-----------|-----------|--------------|--------------|----------|
| cg03996822 | 4  | 74486558  | RASSF6    | -0.129±0.353 | -1.086±0.581 | 5.78E-03 |
| cg00679556 | 6  | 30080782  | TRIM31    | 1.014±0.161  | -0.473±0.9   | 5.81E-03 |
| cg18839416 | 1  | 12805849  | C1orf158  | 0.826±0.161  | -0.036±0.529 | 5.81E-03 |
| cg21907579 | 12 | 114845868 | TBX5-AS1  | -3.349±0.559 | -1.498±1.143 | 5.83E-03 |
| cg02955988 | 4  | 128885294 | C4orf29   | 0.464±0.235  | -0.05±0.297  | 5.83E-03 |
| cg22341310 | 19 | 48048583  | ZNF541    | -1.425±0.514 | -0.165±0.754 | 5.83E-03 |
| cg20498685 | 7  | 19156086  | TWIST1    | -3.886±0.352 | -1.632±1.379 | 5.84E-03 |
| cg06793062 | 16 | 76343868  | CNTNAP4   | 1.755±0.189  | 0.686±0.656  | 5.84E-03 |
| cg13817266 | 1  | 161494402 | HSPA6     | -0.604±0.239 | -0.197±0.179 | 5.84E-03 |
| cg12943082 | 7  | 75419311  | CCL26     | 0.628±0.336  | 1.475±0.51   | 5.85E-03 |
| cg24272559 | 1  | 166572716 | FMO9P     | 2.126±0.5    | 0.295±1.136  | 5.86E-03 |
| cg14333454 | 1  | 27189298  | SFN       | 0.005±0.386  | -1.138±0.703 | 5.86E-03 |
| cg22449114 | 20 | 590243    | TCF15     | -1.766±0.36  | -0.415±0.837 | 5.87E-03 |
| cg02757432 | 10 | 125426048 | GPR26     | -1.35±0.488  | 0.036±0.851  | 5.87E-03 |
| cg19461621 | 18 | 500979    | COLEC12   | -3.521±0.626 | -1.549±1.221 | 5.96E-03 |
| cg02493771 | 21 | 31744328  | KRTAP13-2 | -1.308±0.196 | -1.997±0.428 | 5.96E-03 |
| cg25750259 | 20 | 43104962  | TTPAL     | -3.376±0.371 | -4.413±0.637 | 5.96E-03 |
| cg26128092 | 1  | 3567550   | WRAP73    | -3.05±0.496  | -0.934±1.316 | 6.04E-03 |
| cg19928046 | 5  | 149792249 | CD74      | -4.618±0.256 | -5.481±0.537 | 6.08E-03 |
| cg24989962 | 14 | 52734286  | PTGDR     | -3.025±0.603 | -1.033±1.24  | 6.09E-03 |
| cg13878010 | 3  | 123167276 | ADCY5     | -2.978±0.403 | -0.387±1.596 | 6.09E-03 |
| cg04622802 | 11 | 27015872  | FIBIN     | -1.341±0.442 | -0.158±0.725 | 6.10E-03 |
| cg26767897 | 2  | 31637348  | XDH       | 2.892±0.222  | 1.151±1.068  | 6.10E-03 |
| cg15127733 | 20 | 3713584   | HSPA12B   | -0.547±0.364 | 0.332±0.529  | 6.13E-03 |
| cg24645221 | 8  | 57358928  | PENK      | -3.926±0.607 | -1.822±1.313 | 6.15E-03 |
| cg02168291 | 16 | 82671520  | CDH13     | 1.867±0.267  | 0.625±0.773  | 6.15E-03 |
| cg26186727 | 18 | 70534534  | NETO1     | -2.437±0.598 | -0.73±1.056  | 6.15E-03 |
| cg12559031 | 17 | 48046365  | DLX4      | -3.654±0.213 | -4.192±0.328 | 6.16E-03 |
| cg02624705 | 18 | 49868678  | DCC       | -3.328±0.663 | -1.425±1.177 | 6.16E-03 |
| cg24650501 | 1  | 165324990 | LMX1A     | -3.408±0.399 | -1.831±0.985 | 6.16E-03 |
| cg23642747 | 10 | 105036645 | INA       | -3.311±0.229 | -1.755±0.96  | 6.17E-03 |
| cg07039362 | 16 | 55908870  | CES5A     | 2.035±0.344  | 0.797±0.774  | 6.17E-03 |
| cg13686115 | 10 | 60936626  | PHYHIPL   | -3.699±0.334 | -2.398±0.814 | 6.19E-03 |
| cg08996413 | 8  | 134072427 | SLA       | 0.051±0.448  | -0.994±0.626 | 6.22E-03 |
| cg01447817 | 2  | 241630251 | AQP12A    | 0.568±0.195  | -0.167±0.461 | 6.22E-03 |
| cg11812218 | 3  | 172166920 | GHSR      | -3.066±0.342 | -1.37±1.058  | 6.23E-03 |
| cg24949488 | 10 | 98064362  | DNTT      | 1.612±0.346  | 0.246±0.856  | 6.24E-03 |
| cg15059932 | 18 | 74535233  | ZNF236    | -4.146±0.446 | -4.906±0.347 | 6.24E-03 |
| cg25574024 | 11 | 2161894   | IGF2-AS   | -2.579±0.711 | -0.506±1.289 | 6.24E-03 |
| cg06993413 | 15 | 65810204  | DPP8      | -3.479±0.16  | -4.317±0.523 | 6.24E-03 |
| cg02932669 | 13 | 102068258 | NALCN     | -2.14±0.423  | -0.499±1.028 | 6.24E-03 |
| cg17063929 | 11 | 89224799  | NOX4      | -2.074±0.279 | -0.465±0.999 | 6.24E-03 |
| cg22511262 | 11 | 32455192  | WT1       | -3.376±0.272 | -2.281±0.686 | 6.24E-03 |
| cg01248426 | 8  | 87111155  | ATP6V0D2  | 0.571±0.266  | -0.44±0.634  | 6.25E-03 |
| cg05404787 | 2  | 10281526  | C2orf48   | 2.895±0.322  | 2.026±0.536  | 6.27E-03 |
| cg23447996 | 9  | 93564603  | SYK       | -1.273±0.29  | -1.985±0.433 | 6.27E-03 |
| cg05109049 | 17 | 29641333  | EVI2B     | -0.089±0.536 | -1.313±0.731 | 6.28E-03 |
| cg08572611 | 7  | 100253914 | ACTL6B    | -3.008±0.652 | -0.524±1.56  | 6.28E-03 |
| cg00848461 | 5  | 176732093 | PRELID1   | 1.624±0.325  | 0.207±0.889  | 6.28E-03 |
| cg00933411 | 8  | 13373090  | DLC1      | -0.128±0.281 | -1.223±0.689 | 6.34E-03 |
| cg02257405 | 5  | 131346985 | ACSL6     | -1.3±0.261   | -0.397±0.568 | 6.34E-03 |
| cg00015770 | 4  | 122302007 | QRFP      | -2.278±0.151 | -0.544±1.067 | 6.34E-03 |
| cg14201617 | 2  | 47382452  | C2orf61   | 2.089±0.408  | 2.923±0.476  | 6.35E-03 |
| cg13631913 | 1  | 9600345   | SLC25A33  | -4.058±0.281 | -4.774±0.44  | 6.39E-03 |
| cg25047280 | 7  | 27205479  | HOXA9     | -2.342±0.304 | -0.779±0.98  | 6.39E-03 |
| cg02358804 | 19 | 36719212  | ZNF146    | 1.921±0.421  | 2.619±0.297  | 6.43E-03 |
| cg25226247 | 6  | 50785152  | TFAP2B    | -2.11±0.442  | -0.714±0.878 | 6.45E-03 |
| cg18940763 | 22 | 29197846  | XBP1      | -0.327±0.362 | -1.666±0.845 | 6.46E-03 |
| cg00792849 | 15 | 35046610  | GJD2      | -3.324±0.53  | -1.438±1.191 | 6.49E-03 |
| cg22774472 | 2  | 190044636 | COL5A2    | -2.033±0.25  | -0.529±0.941 | 6.49E-03 |
| cg14384532 | 15 | 88800624  | NTRK3     | -3.449±0.324 | -1.085±1.474 | 6.50E-03 |
| cg12876594 | 9  | 35791798  | NPR2      | -0.053±0.336 | 0.801±0.527  | 6.50E-03 |
| cg23067535 | 8  | 124195133 | FAM83A    | 1.687±0.469  | 0.053±1.032  | 6.50E-03 |
| cg16555388 | 3  | 172241216 | TNFSF10   | -2.917±0.283 | -3.444±0.282 | 6.52E-03 |
| cg03329165 | 3  | 112052218 | CD200     | -5.05±0.413  | -2.702±1.474 | 6.54E-03 |
| cg07260592 | 6  | 161100122 | 0         | -1.075±0.467 | 0.154±0.765  | 6.66E-03 |
| cg15613048 | 1  | 21044031  | KIF17     | -4.62±0.897  | -2.01±1.642  | 6.66E-03 |
| cg18533225 | 22 | 50986813  | KLHDC7B   | 0.094±0.322  | 0.97±0.548   | 6.66E-03 |
| cg18546622 | 11 | 44325029  | ALX4      | -2.631±0.328 | -1.112±0.962 | 6.66E-03 |

|            |    |           |                     |              |              |          |
|------------|----|-----------|---------------------|--------------|--------------|----------|
| cg22881914 | 14 | 52536147  | <i>NID2</i>         | -3.33±0.472  | -0.731±1.638 | 6.67E-03 |
| cg11261264 | 19 | 55720737  | <i>PTPRH</i>        | 2.257±0.304  | 0.814±0.913  | 6.68E-03 |
| cg25176823 | 7  | 5632593   | <i>FSCN1</i>        | -2.905±0.306 | -1.509±0.885 | 6.75E-03 |
| cg27347104 | 12 | 6233657   | <i>VWF</i>          | 0.673±0.273  | 1.332±0.405  | 6.79E-03 |
| cg22920873 | 7  | 139025153 | <i>C7orf55</i>      | -5.157±0.44  | -5.916±0.371 | 6.80E-03 |
| cg14008883 | 10 | 50818911  | <i>SLC18A3</i>      | -2.196±0.471 | -0.579±1.028 | 6.81E-03 |
| cg25391023 | 6  | 32374754  | <i>BTNL2</i>        | 0.921±0.299  | -0.288±0.77  | 6.82E-03 |
| cg12334759 | 19 | 475154    | <i>ODF3L2</i>       | 1.433±0.268  | 0.56±0.555   | 6.82E-03 |
| cg25875213 | 19 | 38183055  | <i>ZNF781</i>       | -4.98±0.82   | -1.493±2.218 | 6.82E-03 |
| cg15422147 | 18 | 61144339  | <i>SERPINB5</i>     | 1.905±0.489  | 0.365±0.978  | 6.85E-03 |
| cg25072962 | 11 | 60524575  | <i>MS4A15</i>       | 1.061±0.285  | -0.03±0.696  | 6.90E-03 |
| cg04072323 | 2  | 229046325 | <i>SPHKAP</i>       | -3.906±0.714 | -1.988±1.205 | 6.91E-03 |
| cg03567830 | 20 | 61339871  | <i>NTSR1</i>        | -2.396±0.577 | -0.902±0.934 | 6.91E-03 |
| cg19463518 | 19 | 634035    | <i>POLRMT</i>       | -3.224±0.31  | -3.879±0.387 | 6.91E-03 |
| cg17945001 | 1  | 18434118  | <i>IGSF21</i>       | -2.496±0.525 | -1.226±0.784 | 6.93E-03 |
| cg01471384 | 4  | 107957265 | <i>DKK2</i>         | -4.572±0.39  | -2.576±1.269 | 6.97E-03 |
| cg03506489 | 11 | 30038788  | <i>KCNA4</i>        | -3.036±0.508 | -1.561±0.936 | 6.98E-03 |
| cg11670211 | 11 | 89224288  | <i>NOX4</i>         | -3.936±0.44  | -1.762±1.385 | 6.98E-03 |
| cg08141873 | 11 | 534632    | <i>HRAS</i>         | -2.296±0.186 | -3.293±0.635 | 6.99E-03 |
| cg19497444 | 11 | 2930794   | <i>SLC22A18</i>     | 1.095±0.265  | 1.61±0.292   | 6.99E-03 |
| cg26215428 | 4  | 88928251  | <i>PKD2</i>         | 1.188±0.193  | 1.772±0.372  | 7.00E-03 |
| cg16092786 | 11 | 32455735  | <i>WT1</i>          | -3.236±0.448 | -1.684±0.992 | 7.00E-03 |
| cg24194775 | 9  | 35791475  | <i>NPR2</i>         | -0.377±0.564 | 1.051±0.891  | 7.01E-03 |
| cg21572897 | 3  | 119277821 | <i>CD80</i>         | 1.635±0.212  | 0.529±0.705  | 7.03E-03 |
| cg15107670 | 11 | 32456759  | <i>WT1</i>          | -3.327±0.723 | -1.073±1.44  | 7.07E-03 |
| cg23641264 | 8  | 143748641 | <i>JRK</i>          | 1.656±0.176  | 2.244±0.377  | 7.07E-03 |
| cg21331821 | 19 | 58545149  | <i>ZSCAN1</i>       | -3.926±0.809 | -1.39±1.62   | 7.07E-03 |
| cg06353345 | 11 | 5322976   | <i>OR51B4</i>       | 0.946±0.166  | -0.144±0.692 | 7.10E-03 |
| cg05350879 | 4  | 88451223  | <i>SPARCL1</i>      | 0.471±0.454  | 1.458±0.596  | 7.26E-03 |
| cg19884262 | 10 | 129535968 | <i>FOXI2</i>        | -3.384±0.536 | -1.369±1.297 | 7.30E-03 |
| cg21581873 | 1  | 204329307 | <i>PLEKHA6</i>      | -2.936±0.323 | -1.507±0.919 | 7.31E-03 |
| cg11011938 | 5  | 9545976   | <i>SEMA5A</i>       | -3.368±0.656 | -2.245±0.557 | 7.31E-03 |
| cg00392257 | 1  | 156696747 | <i>ISG20L2</i>      | 0.413±0.25   | -0.648±0.683 | 7.32E-03 |
| cg02421543 | 1  | 93810826  | <i>LOC100131564</i> | -3.116±0.445 | -3.937±0.451 | 7.32E-03 |
| cg13351406 | 22 | 36031241  | <i>0</i>            | 1.156±0.347  | 0.31±0.529   | 7.34E-03 |
| cg16008138 | 17 | 60885892  | <i>42439</i>        | 0.432±0.284  | -0.397±0.53  | 7.34E-03 |
| cg09067967 | 4  | 39529342  | <i>UGDH-AS1</i>     | -3.55±0.561  | -2.213±0.832 | 7.34E-03 |
| cg23662675 | 20 | 45985596  | <i>ZMYND8</i>       | -5.021±0.455 | -5.821±0.415 | 7.35E-03 |
| cg18691434 | 7  | 99775425  | <i>STAG3</i>        | -2.058±0.414 | -0.517±0.995 | 7.37E-03 |
| cg15439078 | 3  | 46904643  | <i>MYL3</i>         | 3.128±0.297  | 2.399±0.457  | 7.38E-03 |
| cg05412531 | 8  | 125183758 | <i>FER1L6-AS2</i>   | 2.167±0.255  | 2.701±0.319  | 7.39E-03 |
| cg21930712 | 19 | 51761116  | <i>SIGLECL1</i>     | 0.884±0.115  | -0.077±0.611 | 7.40E-03 |
| cg20916523 | 3  | 10184584  | <i>VHL</i>          | 0.798±0.423  | -0.459±0.807 | 7.40E-03 |
| cg11804789 | 20 | 24929716  | <i>CST7</i>         | 0.091±0.438  | -0.982±0.673 | 7.41E-03 |
| cg16855929 | 1  | 231561414 | <i>EGLN1</i>        | 0.238±0.388  | 1.115±0.539  | 7.41E-03 |
| cg18534730 | 19 | 48547448  | <i>CABP5</i>        | 1.439±0.282  | 0.3±0.736    | 7.43E-03 |
| cg17501569 | 16 | 811064    | <i>MSLN</i>         | 1.604±0.513  | 0.589±0.591  | 7.43E-03 |
| cg27584171 | 15 | 49338887  | <i>SECISBP2L</i>    | -4.779±0.315 | -5.524±0.465 | 7.44E-03 |
| cg20018806 | 11 | 59633874  | <i>TCN1</i>         | 1.264±0.236  | 0.149±0.72   | 7.44E-03 |
| cg02115041 | 8  | 53852101  | <i>NPBWR1</i>       | -3.22±0.301  | -1.766±0.939 | 7.45E-03 |
| cg17166812 | 1  | 161169574 | <i>NDUFS2</i>       | -1.61±0.362  | -0.795±0.502 | 7.45E-03 |
| cg24423088 | 21 | 32185365  | <i>KRTAP8-1</i>     | 3.909±0.362  | 1.883±1.302  | 7.46E-03 |
| cg25549459 | 2  | 105471252 | <i>POU3F3</i>       | -3.397±0.448 | -1.675±1.114 | 7.46E-03 |
| cg26991199 | 1  | 24307153  | <i>SRSF10</i>       | -3.193±0.445 | -4.155±0.583 | 7.46E-03 |
| cg25087423 | 11 | 118754535 | <i>CXCR5</i>        | 3.196±0.597  | 1.578±1.032  | 7.47E-03 |
| cg06392096 | 19 | 54824275  | <i>LILRA5</i>       | -0.655±0.117 | -1.157±0.326 | 7.51E-03 |
| cg19091641 | 16 | 21223674  | <i>ZP2</i>          | 1.557±0.301  | 2.135±0.331  | 7.51E-03 |
| cg12614105 | 7  | 24324435  | <i>NPY</i>          | -2.786±0.457 | -1.114±1.085 | 7.56E-03 |
| cg23696949 | 1  | 183155644 | <i>LAMC2</i>        | -0.128±0.232 | -1.124±0.646 | 7.59E-03 |
| cg14419187 | 2  | 210637094 | <i>UNC80</i>        | -2.504±0.375 | -0.56±1.257  | 7.60E-03 |
| cg14948436 | 6  | 39290159  | <i>KCNK16</i>       | 2.655±0.162  | 2.118±0.348  | 7.61E-03 |
| cg12571423 | 13 | 37006748  | <i>CCNA1</i>        | -2.266±0.157 | -0.858±0.901 | 7.63E-03 |
| cg27196745 | 12 | 15475319  | <i>PTPRO</i>        | -2.752±0.424 | -1.177±1.024 | 7.63E-03 |
| cg24468890 | 1  | 32757294  | <i>HDAC1</i>        | -1.588±0.236 | -2.371±0.509 | 7.67E-03 |
| cg22243733 | 11 | 7506434   | <i>OLFML1</i>       | 0.843±0.156  | 1.318±0.308  | 7.68E-03 |
| cg01091565 | 15 | 90294762  | <i>MESP1</i>        | 2.246±0.271  | 0.971±0.828  | 7.69E-03 |
| cg26673195 | 17 | 41052729  | <i>G6PC</i>         | -0.284±0.346 | -1.346±0.688 | 7.70E-03 |
| cg22705929 | 11 | 57417974  | <i>YPEL4</i>        | -1.743±0.268 | -1.009±0.472 | 7.76E-03 |
| cg04490714 | 16 | 55690564  | <i>SLC6A2</i>       | -3.318±0.856 | -1.004±1.487 | 7.77E-03 |

|            |    |           |            |              |              |          |
|------------|----|-----------|------------|--------------|--------------|----------|
| cg20023231 | 16 | 22825282  | HS3ST2     | -3.929±0.454 | -1.961±1.281 | 7.77E-03 |
| cg26365854 | 11 | 44330903  | ALX4       | -4.32±0.425  | -2.108±1.436 | 7.79E-03 |
| cg25563456 | 11 | 32456069  | WT1        | -4.121±0.405 | -1.752±1.535 | 7.82E-03 |
| cg15489301 | 7  | 134213038 | AKR1B10    | -1.444±0.269 | -1.975±0.312 | 7.88E-03 |
| cg04802221 | 16 | 67223955  | EXOC3L1    | 0.613±0.325  | 1.353±0.462  | 7.92E-03 |
| cg23092086 | 16 | 55909573  | CES5A      | 2.01±0.222   | 0.715±0.841  | 7.92E-03 |
| cg05135288 | 16 | 717707    | RHOT2      | 0.023±0.229  | 0.683±0.428  | 7.92E-03 |
| cg14183455 | 1  | 31196733  | MATN1      | 1.879±0.188  | 2.372±0.316  | 7.93E-03 |
| cg03019000 | 3  | 51704351  | TEX264     | 1.499±0.216  | 0.447±0.686  | 7.94E-03 |
| cg09617773 | 6  | 76783708  | IMPG1      | 0.995±0.224  | 0.289±0.461  | 7.94E-03 |
| cg24777710 | 7  | 127636733 | SND1-IT1   | 2.149±0.235  | 2.731±0.371  | 8.00E-03 |
| cg14449575 | 19 | 19373743  | HAPLN4     | -0.483±0.22  | 0.197±0.444  | 8.01E-03 |
| cg21546671 | 17 | 46655387  | HOXB4      | -3.469±0.463 | -0.879±1.688 | 8.01E-03 |
| cg21376883 | 1  | 236850232 | ACTN2      | -2.345±0.42  | -0.676±1.094 | 8.04E-03 |
| cg00187686 | 11 | 59634218  | TCN1       | 0.578±0.394  | -0.658±0.808 | 8.08E-03 |
| cg12840719 | 9  | 21968233  | CDKN2A     | -2.622±0.337 | -1.243±0.905 | 8.08E-03 |
| cg13944141 | 0  | 0         | 0          | 0.827±0.21   | -0.089±0.6   | 8.08E-03 |
| cg21475402 | 1  | 156612140 | BCAN       | -2.34±0.852  | -0.076±1.462 | 8.10E-03 |
| cg00489401 | 5  | 180075875 | FLT4       | -2.58±0.817  | -0.397±1.414 | 8.20E-03 |
| cg17389519 | 10 | 23480730  | PTF1A      | -2.069±0.261 | -1.061±0.664 | 8.29E-03 |
| cg25912717 | 1  | 155176951 | THBS3      | -3.44±0.25   | -4.137±0.454 | 8.31E-03 |
| cg26026726 | 19 | 35862414  | 0          | 2.111±0.484  | 0.996±0.704  | 8.31E-03 |
| cg02833725 | 1  | 156696768 | ISG20L2    | 0.508±0.306  | -0.401±0.597 | 8.45E-03 |
| cg24110050 | 1  | 67217853  | TCTEX1D1   | -4.022±0.301 | -2.081±1.27  | 8.45E-03 |
| cg09229912 | 12 | 111471963 | CUX2       | -3.784±0.994 | -0.717±2.017 | 8.46E-03 |
| cg18267374 | 8  | 24771273  | NEFM       | -3.097±0.396 | -1.011±1.373 | 8.49E-03 |
| cg11299964 | 9  | 128469783 | MAPKAP1    | -2.627±0.333 | -3.384±0.478 | 8.50E-03 |
| cg17199483 | 16 | 16042767  | ABCC1      | -1.636±0.305 | -2.436±0.52  | 8.51E-03 |
| cg23499956 | 1  | 153584920 | S100A16    | 0.3±0.201    | -0.514±0.538 | 8.51E-03 |
| cg04527918 | 2  | 27531170  | UCN        | 0.366±0.363  | 1.317±0.617  | 8.52E-03 |
| cg04995717 | 9  | 27109293  | TEK        | -1.245±0.422 | -0.226±0.654 | 8.55E-03 |
| cg15044041 | 3  | 113160313 | WDR52      | 0.039±0.167  | 0.565±0.347  | 8.55E-03 |
| cg01072821 | 8  | 10382165  | PRSS55     | 0.718±0.257  | -0.156±0.578 | 8.56E-03 |
| cg05782445 | 2  | 26915207  | KCNK3      | -1.444±0.216 | -0.79±0.431  | 8.56E-03 |
| cg08432727 | 2  | 5831722   | SOX11      | -2.385±0.651 | -1.047±0.819 | 8.57E-03 |
| cg00263760 | 10 | 118897366 | VAX1       | -3.293±0.373 | -1.5±1.186   | 8.57E-03 |
| cg14882700 | 4  | 4228571   | OTOP1      | -1.772±0.337 | -0.401±0.908 | 8.57E-03 |
| cg12680609 | 8  | 144328500 | ZFP41      | -3.873±0.517 | -1.83±1.354  | 8.58E-03 |
| cg18822544 | 21 | 31692465  | KRTAP26-1  | 0.684±0.233  | -0.351±0.686 | 8.58E-03 |
| cg03928182 | 12 | 71314662  | PTPRR      | -3.221±0.211 | -1.866±0.89  | 8.59E-03 |
| cg13549845 | 4  | 93225960  | GRID2      | -2.911±0.372 | -1.573±0.887 | 8.61E-03 |
| cg04457979 | 11 | 2890647   | KCNQ1DN    | -1.204±0.351 | -0.136±0.705 | 8.62E-03 |
| cg09674215 | 7  | 19158134  | TWIST1     | -2.99±0.285  | -1.756±0.818 | 8.62E-03 |
| cg09606564 | 17 | 19290353  | MFAP4      | -1.897±0.344 | -1.159±0.461 | 8.63E-03 |
| cg03103192 | 4  | 52917271  | SPATA18    | 0.71±0.239   | -0.218±0.616 | 8.67E-03 |
| cg18267381 | 3  | 21792434  | ZNF385D    | -1.807±0.419 | -0.513±0.857 | 8.72E-03 |
| cg02423618 | 15 | 97325725  | SPATA8-AS1 | 0.687±0.101  | -0.069±0.497 | 8.82E-03 |
| cg16708981 | 19 | 53758609  | ZNF677     | -1.902±0.454 | -0.463±0.956 | 8.89E-03 |
| cg11484872 | 6  | 31543169  | TNF        | 0.627±0.329  | -0.456±0.72  | 8.89E-03 |
| cg10757144 | 5  | 140625237 | PCDHB15    | -2.35±0.185  | -1.241±0.735 | 8.98E-03 |
| cg26312150 | 7  | 19156550  | TWIST1     | -3.073±0.473 | -1.084±1.326 | 8.98E-03 |
| cg14547335 | 3  | 10491247  | ATP2B2     | 2.702±0.422  | 1.231±0.981  | 8.98E-03 |
| cg17412258 | 14 | 101193017 | DLK1       | -4.255±0.493 | -2.462±1.198 | 9.00E-03 |
| cg03662459 | 9  | 34654290  | IL11RA     | 0.831±0.204  | 1.339±0.331  | 9.01E-03 |
| cg23432345 | 7  | 27196153  | HOXA7      | -3.559±0.581 | -0.822±1.825 | 9.02E-03 |
| cg26164184 | 9  | 137771506 | FCN2       | 2.818±0.241  | 1.077±1.151  | 9.04E-03 |
| cg06436504 | 3  | 99833735  | CMSS1      | 0.995±0.366  | 1.823±0.529  | 9.05E-03 |
| cg09340639 | 1  | 157789662 | FCRL1      | -1.552±0.304 | -2.632±0.721 | 9.05E-03 |
| cg16142218 | 8  | 23101221  | CHMP7      | -0.185±0.443 | -1.294±0.725 | 9.06E-03 |
| cg11004890 | 20 | 3218500   | SLC4A11    | -1.391±0.346 | -0.172±0.816 | 9.06E-03 |
| cg02989940 | 16 | 31539234  | AHSP       | 1.9±0.438    | 0.583±0.877  | 9.10E-03 |
| cg05718253 | 19 | 11347359  | DOCK6      | 2.017±0.222  | 2.872±0.573  | 9.10E-03 |
| cg20904010 | 22 | 33402393  | SYN3       | 2.432±0.454  | 1.082±0.898  | 9.12E-03 |
| cg03866607 | 17 | 59532826  | TBX4       | -0.915±0.176 | -0.365±0.368 | 9.12E-03 |
| cg08758850 | 9  | 127533554 | NR6A1      | -3.187±0.381 | -2.149±0.687 | 9.13E-03 |
| cg24109894 | 1  | 36108212  | PSMB2      | 0.039±0.271  | -0.673±0.469 | 9.13E-03 |
| cg21066636 | 17 | 4675292   | TM4SF5     | -0.319±0.141 | -0.91±0.396  | 9.21E-03 |
| cg14701962 | 1  | 162348010 | C1orf226   | 0.837±0.264  | 1.649±0.542  | 9.22E-03 |
| cg06263495 | 11 | 2292004   | ASCL2      | -2.111±0.337 | -0.269±1.23  | 9.24E-03 |

|            |    |           |                   |              |              |          |
|------------|----|-----------|-------------------|--------------|--------------|----------|
| cg06126510 | 5  | 22142613  | <i>PMCHL1</i>     | 0.878±0.148  | 0.119±0.508  | 9.28E-03 |
| cg20542190 | 19 | 54850619  | <i>LILRA4</i>     | -0.522±0.234 | -1.227±0.471 | 9.29E-03 |
| cg25259754 | 1  | 157670220 | <i>FCRL3</i>      | -0.177±0.14  | -1.38±0.798  | 9.31E-03 |
| cg27091787 | 3  | 50360690  | <i>HYAL2</i>      | -0.589±0.378 | 0.379±0.638  | 9.31E-03 |
| cg16638540 | 19 | 58570468  | <i>ZNF135</i>     | -1.838±0.717 | -0.073±1.156 | 9.34E-03 |
| cg18345635 | 17 | 80186080  | <i>SLC16A3</i>    | -0.096±0.283 | -0.713±0.393 | 9.34E-03 |
| cg14654926 | 5  | 44388688  | <i>FGF10</i>      | -3.149±0.273 | -1.817±0.894 | 9.35E-03 |
| cg09964921 | 21 | 35885767  | <i>KCNE1</i>      | 1.649±0.269  | 2.182±0.327  | 9.36E-03 |
| cg23054883 | 12 | 130647580 | <i>FZD10</i>      | -3.233±0.598 | -1.286±1.308 | 9.36E-03 |
| cg11201229 | 11 | 17191235  | <i>PIK3C2A</i>    | 1.648±0.277  | 2.245±0.379  | 9.38E-03 |
| cg20789824 | 9  | 127562861 | <i>OLFML2A</i>    | 0.036±0.395  | 0.863±0.521  | 9.41E-03 |
| cg10141715 | 12 | 101603453 | <i>SLC5A8</i>     | -1.994±0.49  | -0.452±1.036 | 9.52E-03 |
| cg12467090 | 1  | 204459139 | <i>PIK3C2B</i>    | 1.174±0.325  | 1.977±0.529  | 9.62E-03 |
| cg01369413 | 11 | 5530544   | <i>UBQLN3</i>     | 1.902±0.341  | 0.999±0.601  | 9.62E-03 |
| cg26482939 | 19 | 3136710   | <i>GNA15</i>      | -0.747±0.635 | -2.034±0.803 | 9.62E-03 |
| cg11368643 | 5  | 140625059 | <i>PCDHB15</i>    | -1.83±0.312  | -0.564±0.856 | 9.62E-03 |
| cg26780333 | 14 | 74058972  | <i>ACOT4</i>      | -3.702±0.491 | -1.892±1.224 | 9.63E-03 |
| cg04454951 | 7  | 49813031  | <i>VWC2</i>       | -3.612±0.345 | -2.005±1.084 | 9.63E-03 |
| cg13903548 | 6  | 90024543  | <i>GABRR2</i>     | 1.653±0.203  | 2.061±0.253  | 9.63E-03 |
| cg18601426 | 7  | 158381220 | <i>PTPRN2</i>     | -1.482±0.293 | -0.508±0.657 | 9.63E-03 |
| cg12109455 | 10 | 134000737 | <i>DPYSL4</i>     | -2.932±0.681 | -1.298±1.071 | 9.64E-03 |
| cg27065979 | 13 | 52734134  | <i>NEK3</i>       | 0.295±0.398  | 1.781±1.006  | 9.71E-03 |
| cg17051321 | 15 | 83952508  | <i>BNC1</i>       | -2.71±0.35   | -1.259±0.983 | 9.73E-03 |
| cg27342801 | 2  | 79387273  | <i>REG3A</i>      | 2.074±0.187  | 0.719±0.91   | 9.73E-03 |
| cg06165395 | 1  | 37500790  | <i>GRIK3</i>      | -2.384±0.239 | -1.246±0.769 | 9.74E-03 |
| cg16832407 | 9  | 73736539  | <i>TRPM3</i>      | -2.114±0.397 | -0.776±0.906 | 9.74E-03 |
| cg24674703 | 11 | 60869960  | <i>CD5</i>        | 1.772±0.609  | 0.564±0.749  | 9.74E-03 |
| cg12552392 | 20 | 34288511  | <i>NFS1</i>       | 1.278±0.162  | 0.472±0.545  | 9.75E-03 |
| cg08749917 | 3  | 186915320 | <i>RTP1</i>       | -0.24±0.309  | 0.671±0.613  | 9.75E-03 |
| cg25596297 | 2  | 223162875 | <i>CCDC140</i>    | -3.436±0.296 | -1.541±1.276 | 9.80E-03 |
| cg08675585 | 14 | 77292733  | <i>C14orf166B</i> | 1.248±0.31   | 0.596±0.415  | 9.81E-03 |
| cg06005396 | 19 | 590541    | <i>HCN2</i>       | -3.667±0.416 | -1.583±1.411 | 9.82E-03 |
| cg22980079 | 4  | 2627118   | <i>FAM193A</i>    | 1.342±0.373  | 2.057±0.436  | 9.84E-03 |
| cg03704024 | 3  | 129598923 | <i>TMCC1</i>      | 1.098±0.366  | 1.68±0.287   | 9.90E-03 |
| cg14166009 | 19 | 37825309  | <i>HKR1</i>       | -1.116±0.304 | 0.009±0.764  | 9.90E-03 |
| cg11214889 | 18 | 597111    | <i>CLUL1</i>      | -2.206±0.237 | -2.947±0.502 | 9.94E-03 |
| cg20855565 | 1  | 248020350 | <i>TRIM58</i>     | -3.926±0.413 | -1.874±1.393 | 1.00E-02 |

<sup>a</sup>Probe IDs for the Infinium HumanMethylation27 BeadChip (Illumina). <sup>b</sup>National Center for Biotechnology Information (NCBI) Database (Genome Build 37).

Supplementary Table 5D. The 470 probes showing significant differences in DNA methylation levels between adjacent normal lung tissue (N) samples and tumorous tissue (T) samples from patients belonging to the ROS1 fusion group.

| Probe ID <sup>a</sup> | Chromosome | Position <sup>b</sup> | Gene symbol      | M-values (mean±SD) |              | FDR, q   |
|-----------------------|------------|-----------------------|------------------|--------------------|--------------|----------|
|                       |            |                       |                  | N                  | T            |          |
| cg13997435            | 1          | 153538406             | <i>S100A2</i>    | -1.09±0.298        | -2.534±0.308 | 1.59E-04 |
| cg01261503            | 17         | 62493599              | <i>POLG2</i>     | -1.59±0.202        | -2.741±0.254 | 1.68E-04 |
| cg07837085            | 1          | 160708990             | <i>SLAMF7</i>    | -0.123±0.26        | -2.055±0.354 | 1.75E-04 |
| cg24407065            | 1          | 169335802             | <i>NME7</i>      | 1.435±0.241        | 2.61±0.185   | 1.81E-04 |
| cg26322315            | 7          | 7758995               | <i>RPA3</i>      | 0.962±0.376        | -0.786±0.267 | 1.86E-04 |
| cg25964007            | 17         | 9479910               | <i>WDR16</i>     | -1.345±0.426       | -3.502±0.508 | 2.21E-04 |
| cg04304130            | 6          | 11111894              | <i>ERVFRD-1</i>  | 0.977±0.206        | 1.913±0.216  | 2.47E-04 |
| cg09944526            | 10         | 94594201              | <i>EXOC6</i>     | 0.137±0.263        | 1.437±0.315  | 5.61E-04 |
| cg26482939            | 19         | 3136710               | <i>GNA15</i>     | -0.352±0.428       | -2.487±0.578 | 5.65E-04 |
| cg05790038            | 17         | 3461143               | <i>TRPV3</i>     | 1.169±0.323        | -0.06±0.292  | 5.66E-04 |
| cg08876932            | 11         | 71955547              | <i>PHOX2A</i>    | -4.214±0.622       | -1.801±0.623 | 5.67E-04 |
| cg26521404            | 7          | 27204981              | <i>HOXA9</i>     | -2.551±0.754       | 0.604±0.853  | 5.79E-04 |
| cg02164386            | 17         | 42925536              | <i>HIGD1B</i>    | 0.745±0.128        | 1.347±0.145  | 5.82E-04 |
| cg19979773            | 1          | 27702651              | <i>FCN3</i>      | 1.807±0.162        | 2.69±0.239   | 6.08E-04 |
| cg24921858            | 12         | 12223989              | <i>BCL2L14</i>   | -0.515±0.337       | -1.825±0.294 | 6.09E-04 |
| cg06627364            | 2          | 87755088              | <i>LINC00152</i> | -2.821±0.285       | -4.386±0.42  | 6.22E-04 |
| cg01656853            | 19         | 49199172              | <i>FUT2</i>      | -0.244±0.209       | -1.24±0.282  | 6.27E-04 |
| cg22143352            | 14         | 75897841              | <i>JDP2</i>      | -0.243±0.219       | 0.778±0.27   | 6.34E-04 |
| cg01454134            | 19         | 56686707              | <i>GALP</i>      | -0.194±0.175       | 0.688±0.234  | 6.54E-04 |
| cg18940763            | 22         | 29197846              | <i>XBP1</i>      | -0.056±0.176       | -1.89±0.466  | 6.84E-04 |
| cg14826683            | 1          | 153013830             | <i>SPRR2D</i>    | 0.927±0.421        | -0.797±0.482 | 6.96E-04 |
| cg14646244            | 7          | 107300287             | <i>SLC26A4</i>   | -0.983±0.404       | -2.692±0.43  | 7.13E-04 |
| cg04121771            | 3          | 149191624             | <i>TM4SF4</i>    | -0.364±0.185       | -1.359±0.292 | 8.14E-04 |
| cg18752880            | 5          | 34043509              | <i>C1QTNF3</i>   | -2.016±0.373       | -0.762±0.294 | 8.31E-04 |
| cg19368582            | 10         | 88716646              | <i>MMRN2</i>     | -0.096±0.205       | 0.783±0.261  | 8.43E-04 |
| cg23213217            | 1          | 224370155             | <i>DEGS1</i>     | 0.228±0.413        | -1.518±0.462 | 8.46E-04 |
| cg11998307            | 17         | 1549434               | <i>SCARF1</i>    | 1.251±0.233        | 2.342±0.332  | 8.57E-04 |
| cg26799474            | 2          | 202098951             | <i>CASP8</i>     | 0.771±0.381        | -1.516±0.592 | 8.70E-04 |
| cg20158248            | 16         | 16042956              | <i>ABCC1</i>     | -3.129±0.144       | -4.224±0.314 | 8.80E-04 |
| cg22884082            | 6          | 88039023              | <i>GJB7</i>      | 1.596±0.127        | 1.101±0.143  | 8.87E-04 |
| cg10481740            | 4          | 1857103               | <i>LETM1</i>     | -3.059±0.29        | -4.109±0.298 | 8.89E-04 |
| cg21995126            | 3          | 165555262             | <i>BCHE</i>      | -0.954±0.357       | 0.539±0.402  | 9.02E-04 |
| cg18952647            | 15         | 83953744              | <i>BNC1</i>      | -4.008±0.692       | -0.516±1.073 | 9.11E-04 |
| cg15128898            | 5          | 35618029              | <i>SPEF2</i>     | -1.705±0.465       | -3.591±0.572 | 9.11E-04 |
| cg25645462            | 16         | 57653702              | <i>GPR56</i>     | 1.969±0.378        | 0.271±0.525  | 9.15E-04 |
| cg22545356            | 10         | 88716659              | <i>MMRN2</i>     | 0.651±0.286        | 1.638±0.25   | 9.21E-04 |
| cg19091641            | 16         | 21223674              | <i>ZP2</i>       | 1.384±0.182        | 2.295±0.25   | 9.32E-04 |
| cg16112050            | 18         | 713200                | <i>ENOSF1</i>    | 2.458±0.356        | 1.037±0.414  | 9.55E-04 |
| cg09325711            | 7          | 39662764              | <i>RALA</i>      | -2.322±0.309       | -4.053±0.537 | 1.03E-03 |
| cg11172423            | 1          | 43205623              | <i>CLDN19</i>    | 0.991±0.209        | 2.437±0.438  | 1.10E-03 |
| cg20881888            | 3          | 50383079              | <i>ZMYND10</i>   | -0.035±0.479       | -1.755±0.515 | 1.11E-03 |
| cg26609631            | 13         | 28366814              | <i>GSX1</i>      | -2.404±0.638       | 0.2±0.822    | 1.14E-03 |
| cg08118311            | 18         | 76740401              | <i>SALL3</i>     | -3.448±0.482       | -0.743±0.864 | 1.24E-03 |
| cg10636246            | 1          | 159046973             | <i>AIM2</i>      | -0.23±0.392        | -2.395±0.695 | 1.26E-03 |
| cg26727372            | 18         | 48404491              | <i>ME2</i>       | -1.748±0.276       | -2.62±0.193  | 1.26E-03 |
| cg13301014            | 19         | 38754768              | <i>SPINT2</i>    | -2.393±0.308       | -3.727±0.433 | 1.27E-03 |
| cg23671708            | 17         | 7758291               | <i>TMEM88</i>    | 0.639±0.315        | 1.958±0.425  | 1.28E-03 |
| cg26316946            | 6          | 101846967             | <i>GRIK2</i>     | -2.573±0.495       | -0.449±0.684 | 1.28E-03 |
| cg16313343            | 14         | 105768109             | <i>BRF1</i>      | -1.511±0.425       | -3.097±0.506 | 1.33E-03 |
| cg18818531            | 11         | 65668277              | <i>FOSL1</i>     | -0.452±0.357       | -1.927±0.481 | 1.33E-03 |
| cg02919422            | 8          | 55370544              | <i>SOX17</i>     | -2.035±0.415       | 0.069±0.691  | 1.38E-03 |
| cg19780563            | 10         | 94594494              | <i>EXOC6</i>     | 0.865±0.245        | 2.044±0.346  | 1.39E-03 |
| cg12128839            | 7          | 27183436              | <i>HOXA5</i>     | -2.402±0.549       | -0.379±0.653 | 1.40E-03 |
| cg12003230            | 21         | 44899139              | <i>LINC00313</i> | 0.815±0.231        | 1.915±0.364  | 1.40E-03 |
| cg10303487            | 8          | 105479058             | <i>DPYS</i>      | -3.253±0.816       | -0.404±0.901 | 1.41E-03 |
| cg15107670            | 11         | 32456759              | <i>WT1</i>       | -3.805±0.645       | -0.668±1.038 | 1.42E-03 |
| cg15514848            | 1          | 171217555             | <i>FMO1</i>      | -0.162±0.307       | 0.888±0.254  | 1.43E-03 |
| cg13301933            | 15         | 61521439              | <i>RORA</i>      | -4.903±0.271       | -4.09±0.206  | 1.52E-03 |
| cg07959477            | 12         | 10251879              | <i>CLEC1A</i>    | -0.345±0.241       | 0.773±0.376  | 1.53E-03 |
| cg02000005            | 14         | 105953642             | <i>CRIP1</i>     | -3.12±0.3          | -4.077±0.295 | 1.76E-03 |
| cg18992201            | 3          | 109035381             | <i>DPPA2</i>     | 1.547±0.298        | 2.422±0.217  | 1.78E-03 |
| cg00392257            | 1          | 156696747             | <i>ISG20L2</i>   | 0.56±0.244         | -0.864±0.479 | 1.82E-03 |
| cg26218269            | 4          | 151503227             | <i>MAB21L2</i>   | 0.669±0.209        | 1.732±0.367  | 1.93E-03 |
| cg07533148            | 1          | 248020812             | <i>TRIM58</i>    | -4.729±1.359       | -0.123±1.526 | 1.95E-03 |
| cg25145670            | 17         | 46655164              | <i>HOXB4</i>     | -2.277±0.277       | -0.479±0.601 | 1.96E-03 |
| cg26894575            | 1          | 153518054             | <i>S100A4</i>    | -1.916±0.321       | -3.009±0.363 | 1.97E-03 |

|            |    |           |            |              |              |          |
|------------|----|-----------|------------|--------------|--------------|----------|
| cg13247990 | 16 | 46782176  | MYLK3      | 1.496±0.109  | 2.282±0.258  | 1.98E-03 |
| cg10368842 | 10 | 115511504 | PLEKHS1    | 1.023±0.32   | -1.089±0.714 | 1.99E-03 |
| cg20234959 | 1  | 236237760 | 0          | 1.305±0.284  | 0.149±0.268  | 1.99E-03 |
| cg17274064 | 21 | 40033892  | ERG        | -1.592±0.36  | -2.861±0.433 | 2.00E-03 |
| cg03289872 | 19 | 56989102  | ZNF667-AS1 | -3.925±0.586 | -0.826±1.076 | 2.03E-03 |
| cg25123470 | 10 | 103603722 | KCNIP2     | -1.647±0.375 | -2.938±0.434 | 2.03E-03 |
| cg00519208 | 1  | 93258319  | EVI5       | 0.042±0.238  | 0.958±0.284  | 2.04E-03 |
| cg23033845 | 17 | 7758662   | TMEM88     | 1.329±0.262  | 2.311±0.344  | 2.10E-03 |
| cg26728422 | 16 | 1429015   | UNKL       | -1.267±0.467 | -3.223±0.693 | 2.12E-03 |
| cg02757432 | 10 | 125426048 | GPR26      | -1.4±0.438   | 0.214±0.563  | 2.13E-03 |
| cg13634319 | 12 | 56323727  | DGKA       | 0.336±0.357  | -1.46±0.635  | 2.16E-03 |
| cg11450827 | 22 | 19513006  | CLDN5      | 0.15±0.302   | 1.625±0.524  | 2.18E-03 |
| cg03312532 | 15 | 90166033  | TICRR      | 0.753±0.26   | 1.615±0.293  | 2.20E-03 |
| cg14477619 | 7  | 44580881  | NPC1L1     | 1.61±0.216   | 2.26±0.204   | 2.21E-03 |
| cg20291049 | 2  | 105472217 | POU3F3     | -2.072±0.371 | 0.232±0.8    | 2.21E-03 |
| cg03177025 | 2  | 28112917  | RBKS       | -1.421±0.311 | -2.785±0.494 | 2.28E-03 |
| cg14221831 | 16 | 66952714  | CDH16      | 1.356±0.135  | 1.903±0.197  | 2.28E-03 |
| cg22485810 | 17 | 29248725  | ADAP2      | -1.162±0.226 | -2.295±0.407 | 2.29E-03 |
| cg04048259 | 20 | 57875346  | EDN3       | -3.501±0.718 | -0.287±1.157 | 2.30E-03 |
| cg17050972 | 6  | 27782197  | HIST1H2AJ  | -2.858±0.311 | -3.892±0.358 | 2.31E-03 |
| cg01280080 | 2  | 216177276 | ATIC       | -1.38±0.347  | -3.102±0.618 | 2.32E-03 |
| cg18536148 | 17 | 59533844  | TBX4       | -1.466±0.425 | 0.415±0.684  | 2.40E-03 |
| cg06409153 | 17 | 67323953  | ABCA5      | -1.582±0.207 | -2.609±0.374 | 2.42E-03 |
| cg20644981 | 4  | 152020400 | RPS3A      | -2.094±0.362 | -3.637±0.564 | 2.43E-03 |
| cg06005396 | 19 | 590541    | HCN2       | -3.912±0.447 | -1.739±0.791 | 2.45E-03 |
| cg21275690 | 16 | 3072970   | THOC6      | 0.424±0.14   | -0.64±0.367  | 2.45E-03 |
| cg07195577 | 17 | 27052828  | TLCD1      | -1.889±0.478 | -3.803±0.698 | 2.45E-03 |
| cg04653021 | 3  | 122514541 | DIRC2      | -2.406±0.154 | -1.85±0.201  | 2.46E-03 |
| cg13699808 | 20 | 45985339  | ZMYND8     | -0.885±0.307 | -2.549±0.602 | 2.46E-03 |
| cg23290344 | 8  | 24771466  | NEFM       | -3.229±0.983 | 0.024±1.148  | 2.46E-03 |
| cg20023231 | 16 | 22825282  | HS3ST2     | -3.593±0.535 | -1.347±0.831 | 2.58E-03 |
| cg00221494 | 13 | 98794593  | FARP1      | -1.57±0.397  | -3.228±0.615 | 2.61E-03 |
| cg06766367 | 16 | 67062687  | CBFB       | -1.965±0.249 | -3.276±0.48  | 2.61E-03 |
| cg27347104 | 12 | 6233657   | VWF        | 0.541±0.184  | 1.368±0.307  | 2.62E-03 |
| cg23447996 | 9  | 93564603  | SYK        | -1.012±0.199 | -2.006±0.366 | 2.63E-03 |
| cg15164103 | 7  | 130126871 | MEST       | -0.852±0.285 | -1.966±0.417 | 2.65E-03 |
| cg15749858 | 7  | 20256996  | MACC1      | -1.619±0.326 | -2.546±0.26  | 2.66E-03 |
| cg07271264 | 11 | 17740977  | MYOD1      | -2.826±0.63  | -0.373±0.92  | 2.66E-03 |
| cg26963271 | 1  | 66259081  | PDE4B      | -4.05±0.721  | -1.313±1.023 | 2.67E-03 |
| cg19030554 | 16 | 1822289   | NME3       | -2.116±0.396 | -3.386±0.454 | 2.68E-03 |
| cg04228042 | 12 | 14996527  | ART4       | 0.42±0.257   | 1.812±0.516  | 2.68E-03 |
| cg08141873 | 11 | 534632    | HRAS       | -2.386±0.33  | -3.592±0.446 | 2.69E-03 |
| cg13549845 | 4  | 93225960  | GRID2      | -3.069±0.409 | -0.979±0.779 | 2.69E-03 |
| cg12447832 | 2  | 3383257   | TRAPPC12   | -0.245±0.283 | -1.173±0.335 | 2.69E-03 |
| cg06088032 | 3  | 50383227  | ZMYND10    | -1.043±0.613 | -3.101±0.749 | 2.70E-03 |
| cg03490200 | 12 | 8975196   | A2ML1      | 2.692±0.204  | 1.327±0.489  | 2.70E-03 |
| cg10186456 | 16 | 2892912   | PRSS30P    | 0.001±0.487  | 1.591±0.571  | 2.71E-03 |
| cg15381313 | 12 | 100867509 | NR1H4      | -0.201±0.248 | 1.07±0.471   | 2.72E-03 |
| cg19220586 | 1  | 167522470 | CREG1      | -3.695±0.353 | -4.759±0.371 | 2.75E-03 |
| cg04411625 | 14 | 105953462 | CRIP1      | -3.852±0.353 | -4.997±0.416 | 2.75E-03 |
| cg14607011 | 10 | 135171746 | FUOM       | 1.762±0.306  | 2.768±0.368  | 2.76E-03 |
| cg12111714 | 13 | 26043472  | ATP8A2     | -1.765±0.346 | 0.441±0.807  | 2.80E-03 |
| cg06194808 | 7  | 1596217   | TMEM184A   | 1.541±0.445  | -0.622±0.818 | 2.87E-03 |
| cg24895052 | 17 | 41909601  | MPP3       | 1.124±0.27   | 1.834±0.185  | 2.87E-03 |
| cg05859264 | 6  | 36097692  | MAPK13     | 0.295±0.279  | -1.405±0.628 | 2.88E-03 |
| cg13351583 | 9  | 91793648  | SHC3       | -2.216±0.254 | -3.191±0.371 | 2.89E-03 |
| cg18741908 | 3  | 169756818 | GPR160     | -0.673±0.249 | -2±0.501     | 2.94E-03 |
| cg16692277 | 13 | 51640948  | GUCY1B2    | -1.143±0.192 | -2.399±0.463 | 2.95E-03 |
| cg22876908 | 12 | 56325149  | DGKA       | -0.908±0.155 | -1.82±0.341  | 2.96E-03 |
| cg22844623 | 1  | 228336130 | GJC2       | 1.272±0.168  | 2.249±0.365  | 2.98E-03 |
| cg16773028 | 1  | 111148339 | KCNA2      | 0.16±0.257   | 1.231±0.413  | 3.03E-03 |
| cg14333454 | 1  | 27189298  | SFN        | 0.058±0.394  | -1.494±0.597 | 3.03E-03 |
| cg14209518 | 11 | 114166636 | NNMT       | 0.667±0.344  | -0.403±0.393 | 3.07E-03 |
| cg10106388 | 1  | 160832662 | CD244      | -1.81±0.35   | -3.244±0.556 | 3.18E-03 |
| cg00446235 | 1  | 161008644 | TSTD1      | -1.1±0.574   | -2.929±0.682 | 3.19E-03 |
| cg21460081 | 17 | 46656012  | HOXB4      | -3.659±0.245 | -1.196±0.872 | 3.20E-03 |
| cg02250594 | 18 | 55103353  | ONECUT2    | -2.63±0.563  | 0.238±1.105  | 3.27E-03 |
| cg13153865 | 8  | 90914101  | OSGIN2     | -2.936±0.354 | -4.11±0.448  | 3.32E-03 |
| cg07059052 | 16 | 2828302   | TCEB2      | -2.488±0.301 | -3.93±0.56   | 3.34E-03 |
| cg22881914 | 14 | 52536147  | NID2       | -3.811±1.199 | -0.082±1.392 | 3.36E-03 |

|            |    |           |                  |              |              |          |
|------------|----|-----------|------------------|--------------|--------------|----------|
| cg10549973 | 14 | 58863097  | <i>TOMM20L</i>   | -1.253±0.482 | -3.179±0.755 | 3.39E-03 |
| cg25781162 | 2  | 44065996  | <i>ABCG5</i>     | 1.882±0.329  | 2.722±0.219  | 3.39E-03 |
| cg04424621 | 6  | 27101941  | <i>HIST1H2BJ</i> | -0.775±0.37  | -2.316±0.54  | 3.42E-03 |
| cg04420907 | 17 | 9480215   | <i>WDR16</i>     | -2.635±0.335 | -4.328±0.658 | 3.42E-03 |
| cg08548888 | 3  | 38180840  | <i>MYD88</i>     | -2.65±0.16   | -3.238±0.23  | 3.43E-03 |
| cg03131527 | 3  | 197301250 | <i>BDH1</i>      | -0.987±0.285 | 0.247±0.433  | 3.43E-03 |
| cg12869058 | 1  | 94587872  | <i>ABCA4</i>     | 1.245±0.513  | -0.464±0.66  | 3.45E-03 |
| cg05064181 | 10 | 116445398 | <i>ABLM1</i>     | 0.31±0.282   | 1.584±0.502  | 3.48E-03 |
| cg07639720 | 15 | 83952875  | <i>BNC1</i>      | -3.86±0.395  | -1.827±0.795 | 3.50E-03 |
| cg19988449 | 15 | 83952808  | <i>BNC1</i>      | -2.866±0.419 | -0.559±0.896 | 3.50E-03 |
| cg05654163 | 14 | 21467502  | <i>SLC39A2</i>   | 1.111±0.298  | 0±0.438      | 3.51E-03 |
| cg15679095 | 6  | 42789053  | <i>GLTSCR1L</i>  | 1.147±0.265  | 2.096±0.334  | 3.52E-03 |
| cg09229912 | 12 | 111471963 | <i>CUX2</i>      | -4.402±1.031 | -1.422±1.087 | 3.52E-03 |
| cg10281002 | 12 | 114846399 | <i>TBX5</i>      | -2.746±0.25  | -0.981±0.667 | 3.52E-03 |
| cg26861460 | 22 | 44575455  | <i>PARVG</i>     | -0.601±0.205 | 0.551±0.449  | 3.64E-03 |
| cg25468723 | 22 | 26566058  | <i>SEZ6L</i>     | -5.015±0.301 | -4.218±0.265 | 3.69E-03 |
| cg24898753 | 11 | 61735917  | <i>FTH1</i>      | -0.722±0.391 | -2.535±0.724 | 3.82E-03 |
| cg12611860 | 11 | 17191617  | <i>PIK3C2A</i>   | 0.542±0.219  | 1.684±0.401  | 3.89E-03 |
| cg11946503 | 5  | 134870514 | <i>NEUROG1</i>   | -2.811±0.419 | -0.995±0.731 | 3.90E-03 |
| cg05726109 | 22 | 19709755  | <i>GP1BB</i>     | 1.048±0.219  | 2.274±0.483  | 3.90E-03 |
| cg24754277 | 9  | 90114156  | <i>DAPK1</i>     | -0.88±0.372  | -1.86±0.293  | 3.92E-03 |
| cg03734874 | 14 | 105071382 | <i>TMEM179</i>   | -1.888±0.521 | 0.118±0.809  | 3.97E-03 |
| cg24441911 | 12 | 7280988   | <i>RBP5</i>      | 1.512±0.455  | 2.658±0.344  | 3.99E-03 |
| cg21458907 | 3  | 62860802  | <i>CADPS</i>     | -3.924±0.718 | -1.458±0.99  | 4.00E-03 |
| cg09845785 | 2  | 183387501 | <i>PDE1A</i>     | -2.57±0.389  | -1.023±0.627 | 4.01E-03 |
| cg26575445 | 3  | 169756530 | <i>GPR160</i>    | -3.481±0.394 | -5.106±0.66  | 4.02E-03 |
| cg01946401 | 6  | 45296101  | <i>RUNX2</i>     | 0.377±0.157  | -0.78±0.446  | 4.02E-03 |
| cg22061523 | 17 | 76183551  | <i>AFMID</i>     | -2.553±0.288 | -3.345±0.289 | 4.03E-03 |
| cg04720330 | 11 | 2949813   | <i>PHLDA2</i>    | -1.835±0.35  | -3.122±0.52  | 4.03E-03 |
| cg20903926 | 1  | 55271677  | <i>C1orf177</i>  | 1.84±0.319   | 3.401±0.627  | 4.03E-03 |
| cg06491116 | 11 | 118122715 | <i>MPZL3</i>     | -1.46±0.33   | -3.236±0.707 | 4.05E-03 |
| cg00411097 | 7  | 1596050   | <i>TMEM184A</i>  | 0.013±0.186  | -1.057±0.426 | 4.18E-03 |
| cg20959866 | 1  | 4714008   | <i>AJAP1</i>     | -3.385±0.44  | -0.863±1.011 | 4.36E-03 |
| cg24762359 | 13 | 25254447  | <i>ATP12A</i>    | -3.045±0.404 | -4.361±0.529 | 4.36E-03 |
| cg15540820 | 3  | 27765283  | <i>EOMES</i>     | -3.312±0.303 | -0.529±1.059 | 4.38E-03 |
| cg22879289 | 1  | 236237743 | <i>0</i>         | 0.28±0.272   | -0.632±0.334 | 4.39E-03 |
| cg14265075 | 1  | 157016521 | <i>ARHGEF11</i>  | -1.55±0.334  | -2.72±0.481  | 4.39E-03 |
| cg07104706 | 13 | 84456127  | <i>SLITRK1</i>   | -3.806±0.278 | -0.559±1.218 | 4.40E-03 |
| cg00539322 | 2  | 234216360 | <i>SAG</i>       | 0.289±0.319  | 1.165±0.295  | 4.40E-03 |
| cg08399444 | 12 | 13248548  | <i>GSG1</i>      | 1.442±0.181  | 2.223±0.288  | 4.40E-03 |
| cg06910100 | 19 | 17375091  | <i>USHBP1</i>    | 1.232±0.333  | 2.462±0.507  | 4.41E-03 |
| cg09060914 | 1  | 169599558 | <i>SELP</i>      | 0.067±0.285  | 1.31±0.458   | 4.41E-03 |
| cg15840658 | 9  | 72287152  | <i>APBA1</i>     | -4.813±0.342 | -3.577±0.507 | 4.42E-03 |
| cg06692050 | 10 | 99532398  | <i>SFRP5</i>     | 2.161±0.473  | 3.358±0.404  | 4.42E-03 |
| cg03815350 | 12 | 53663042  | <i>ESPL1</i>     | 1.695±0.142  | 2.349±0.271  | 4.42E-03 |
| cg06084117 | 7  | 132334901 | <i>FLJ40288</i>  | 1.433±0.346  | 2.456±0.401  | 4.43E-03 |
| cg21572897 | 3  | 119277821 | <i>CD80</i>      | 1.581±0.243  | 0.746±0.343  | 4.43E-03 |
| cg05337441 | 2  | 21266568  | <i>APOB</i>      | -1.058±0.303 | -2.158±0.455 | 4.44E-03 |
| cg09243021 | 7  | 142985019 | <i>CASP2</i>     | -1.197±0.322 | 0.612±0.729  | 4.44E-03 |
| cg09924998 | 12 | 122751933 | <i>VPS33A</i>    | -0.145±0.26  | -1.308±0.478 | 4.44E-03 |
| cg21484834 | 20 | 62168579  | <i>PTK6</i>      | 1.123±0.14   | 0.162±0.379  | 4.44E-03 |
| cg02337447 | 17 | 10602032  | <i>ADPRM</i>     | 0.577±0.279  | -0.844±0.445 | 4.44E-03 |
| cg24989962 | 14 | 52734286  | <i>PTGDR</i>     | -2.995±0.61  | -0.342±1.093 | 4.44E-03 |
| cg22828602 | 7  | 122338579 | <i>RNF133</i>    | 1.036±0.225  | 0.126±0.379  | 4.45E-03 |
| cg12441928 | 3  | 46249985  | <i>CCR1</i>      | -3.033±0.352 | -4.466±0.597 | 4.46E-03 |
| cg05261299 | 12 | 52437299  | <i>NR4A1</i>     | 1.477±0.415  | 2.811±0.544  | 4.46E-03 |
| cg11935147 | 1  | 145075831 | <i>PDE4DIP</i>   | -2.078±0.351 | -0.371±0.704 | 4.48E-03 |
| cg05441133 | 10 | 48416891  | <i>GDF2</i>      | 0.695±0.278  | 2.348±0.673  | 4.55E-03 |
| cg12014417 | 12 | 123187920 | <i>HCAR2</i>     | 0.149±0.386  | -0.884±0.386 | 4.55E-03 |
| cg02833725 | 1  | 156696768 | <i>ISG20L2</i>   | 0.535±0.197  | -0.629±0.475 | 4.55E-03 |
| cg21418052 | 13 | 31773806  | <i>B3GALTL</i>   | -0.55±0.179  | -1.331±0.327 | 4.55E-03 |
| cg14552982 | 9  | 133568226 | <i>EXOSC2</i>    | -0.176±0.375 | 0.799±0.315  | 4.56E-03 |
| cg05996042 | 6  | 45295718  | <i>RUNX2</i>     | 0.116±0.215  | -0.862±0.364 | 4.56E-03 |
| cg14072120 | 22 | 37640402  | <i>RAC2</i>      | -3.161±0.212 | -4.167±0.418 | 4.56E-03 |
| cg09432154 | 3  | 151034669 | <i>GPR87</i>     | -0.117±0.263 | -1.142±0.429 | 4.57E-03 |
| cg04348872 | 2  | 25141696  | <i>ADCY3</i>     | 2.793±0.099  | 3.333±0.222  | 4.57E-03 |
| cg04810997 | 7  | 143140674 | <i>TAS2R60</i>   | 2.241±0.41   | 0.903±0.553  | 4.57E-03 |
| cg26626042 | 6  | 32151594  | <i>AGER</i>      | 1.266±0.315  | 2.252±0.402  | 4.58E-03 |
| cg06151165 | 20 | 25062254  | <i>VSX1</i>      | -4.653±0.687 | -1.175±1.446 | 4.58E-03 |
| cg22740835 | 1  | 162602559 | <i>DDR2</i>      | 0.238±0.211  | 1.543±0.528  | 4.58E-03 |

|            |    |           |                   |              |              |          |
|------------|----|-----------|-------------------|--------------|--------------|----------|
| cg19025034 | 19 | 49198900  | <i>FUT2</i>       | 2.515±0.201  | 1.344±0.481  | 4.58E-03 |
| cg01324261 | 4  | 174320378 | <i>SCRG1</i>      | 0.574±0.188  | 1.789±0.432  | 4.59E-03 |
| cg02812142 | 2  | 135595323 | <i>ACMSD</i>      | 1.381±0.302  | -0.134±0.631 | 4.59E-03 |
| cg10238818 | 21 | 27945554  | <i>CYYR1</i>      | -3.505±0.55  | -0.864±1.106 | 4.59E-03 |
| cg14287742 | 1  | 169335773 | <i>NME7</i>       | 1.298±0.309  | 2.676±0.58   | 4.60E-03 |
| cg01459453 | 1  | 169599212 | <i>SELP</i>       | 0.682±0.201  | 1.602±0.386  | 4.61E-03 |
| cg25778479 | 7  | 16686771  | <i>BZW2</i>       | -0.609±0.27  | -2.209±0.656 | 4.62E-03 |
| cg26614073 | 3  | 47517819  | <i>SCAP</i>       | 0±0.282      | -0.821±0.329 | 4.62E-03 |
| cg25750259 | 20 | 43104962  | <i>TTPAL</i>      | -3.353±0.432 | -4.591±0.496 | 4.70E-03 |
| cg04809787 | 17 | 7348339   | <i>CHRNA1</i>     | -1.685±0.366 | -2.801±0.457 | 4.70E-03 |
| cg14564494 | 21 | 37506911  | <i>CBR3</i>       | -1.037±0.256 | -2.057±0.433 | 4.72E-03 |
| cg01274660 | 7  | 100465625 | <i>TRIP6</i>      | -1.049±0.257 | -1.887±0.351 | 4.72E-03 |
| cg15089387 | 5  | 110406661 | <i>TSLP</i>       | -1.163±0.301 | -2.485±0.559 | 4.72E-03 |
| cg10107725 | 2  | 160761556 | <i>LY75-CD302</i> | -0.468±0.189 | -1.702±0.505 | 4.72E-03 |
| cg03311899 | 12 | 123187857 | <i>HCAR2</i>      | 3.053±0.351  | 1.526±0.649  | 4.73E-03 |
| cg00096922 | 7  | 96654185  | <i>DLX5</i>       | -4.651±0.386 | -2.751±0.8   | 4.73E-03 |
| cg03283569 | 9  | 127963181 | <i>RABEPK</i>     | -2.493±0.269 | -3.229±0.287 | 4.73E-03 |
| cg01885635 | 3  | 40566085  | <i>ZNF621</i>     | -2.72±0.219  | -3.315±0.231 | 4.74E-03 |
| cg12554573 | 3  | 51976667  | <i>PARP3</i>      | 0.63±0.178   | -0.491±0.46  | 4.74E-03 |
| cg26929536 | 15 | 51973460  | <i>SCG3</i>       | -1.805±0.24  | -0.681±0.476 | 4.77E-03 |
| cg10705800 | 1  | 41328420  | <i>CITED4</i>     | -0.865±0.322 | -2.162±0.556 | 4.87E-03 |
| cg13323752 | 12 | 8025567   | <i>SLC2A14</i>    | -4.5±0.736   | -1.181±1.413 | 4.88E-03 |
| cg11721194 | 1  | 160709239 | <i>SLAMF7</i>     | 0.389±0.212  | -0.773±0.488 | 4.88E-03 |
| cg20018806 | 11 | 59633874  | <i>TCN1</i>       | 1.377±0.213  | -0.309±0.682 | 4.88E-03 |
| cg06531741 | 11 | 113775450 | <i>HTR3B</i>      | 0.584±0.229  | 2.086±0.618  | 4.89E-03 |
| cg14458834 | 17 | 46655394  | <i>HOXB4</i>      | -3.47±0.586  | -0.012±1.441 | 4.89E-03 |
| cg20366906 | 13 | 53422381  | <i>PCDH8</i>      | -1.988±0.422 | -0.27±0.735  | 4.90E-03 |
| cg03103192 | 4  | 52917271  | <i>SPATA18</i>    | 0.629±0.281  | -0.592±0.522 | 4.90E-03 |
| cg25057743 | 2  | 209271505 | <i>PTH2R</i>      | -2.695±0.393 | -0.651±0.865 | 4.94E-03 |
| cg24199834 | 4  | 147560126 | <i>POU4F2</i>     | -3.038±0.31  | -0.126±1.162 | 4.95E-03 |
| cg13376158 | 17 | 73128023  | <i>NT5C</i>       | -3.912±0.32  | -5.233±0.568 | 4.98E-03 |
| cg11204562 | 10 | 115511153 | <i>PLEKHS1</i>    | 2.379±0.435  | 0.327±0.878  | 4.99E-03 |
| cg24652919 | 16 | 3073191   | <i>THOC6</i>      | 0.491±0.219  | -0.581±0.457 | 5.00E-03 |
| cg04434339 | 2  | 107503547 | <i>ST6GAL2</i>    | -4.317±0.554 | -2.398±0.822 | 5.01E-03 |
| cg07086380 | 5  | 118691033 | <i>TNFAIP8</i>    | 1.087±0.349  | -0.49±0.677  | 5.01E-03 |
| cg22858288 | 11 | 2930322   | <i>SLC22A18</i>   | 0.507±0.161  | 1.644±0.469  | 5.02E-03 |
| cg11208483 | 13 | 95364233  | <i>SOX21</i>      | -1.475±0.179 | -0.446±0.434 | 5.03E-03 |
| cg15113803 | 3  | 129247119 | <i>RHO</i>        | 2.694±0.305  | 1.959±0.252  | 5.05E-03 |
| cg10784813 | 16 | 11348678  | <i>SOCS1</i>      | 0.476±0.295  | -0.84±0.567  | 5.05E-03 |
| cg27169020 | 15 | 83954229  | <i>BNC1</i>       | -1.477±0.343 | 0.18±0.71    | 5.05E-03 |
| cg20468883 | 15 | 59982396  | <i>BNIP2</i>      | -1.401±0.151 | -2.236±0.313 | 5.07E-03 |
| cg20404387 | 1  | 20879296  | <i>FAM43B</i>     | -3.042±0.451 | -0.857±0.936 | 5.07E-03 |
| cg09936561 | 4  | 9783623   | <i>DRD5</i>       | -2.27±0.35   | -0.504±0.757 | 5.13E-03 |
| cg26767897 | 2  | 31637348  | <i>XDH</i>        | 2.872±0.268  | 0.472±0.974  | 5.21E-03 |
| cg10484958 | 13 | 53424127  | <i>PCDH8</i>      | -3.306±0.339 | -2.088±0.529 | 5.23E-03 |
| cg19947621 | 9  | 34263021  | <i>KIF24</i>      | 1.53±0.294   | 0.314±0.472  | 5.24E-03 |
| cg05050341 | 9  | 130617534 | <i>ENG</i>        | 0.201±0.231  | 1.158±0.416  | 5.26E-03 |
| cg18493147 | 19 | 474445    | <i>ODF3L2</i>     | 1.997±0.356  | 3.14±0.491   | 5.26E-03 |
| cg21604615 | 1  | 27668610  | <i>SYTL1</i>      | -0.55±0.342  | -2.424±0.801 | 5.27E-03 |
| cg03082060 | 1  | 236680224 | <i>LGALS8</i>     | -0.232±0.242 | -1.1±0.378   | 5.27E-03 |
| cg20530056 | 1  | 206643377 | <i>IKBKE</i>      | 0.189±0.233  | -1.079±0.543 | 5.28E-03 |
| cg04317399 | 7  | 27170313  | <i>HOXA4</i>      | -1.069±0.488 | 0.368±0.603  | 5.28E-03 |
| cg04947157 | 17 | 76128481  | <i>TMC6</i>       | 0.4±0.4      | -1.447±0.803 | 5.29E-03 |
| cg04534765 | 18 | 74962369  | <i>GALR1</i>      | -3.657±0.806 | -0.629±1.324 | 5.30E-03 |
| cg09156233 | 4  | 95679705  | <i>BMPR1B</i>     | -3.5±0.672   | -1.765±0.676 | 5.32E-03 |
| cg23696949 | 1  | 183155644 | <i>LAMC2</i>      | -0.106±0.314 | -1.206±0.479 | 5.32E-03 |
| cg15781838 | 2  | 128422717 | <i>LIMS2</i>      | 1.488±0.229  | 2.523±0.452  | 5.41E-03 |
| cg22373112 | 17 | 40307717  | <i>RAB5C</i>      | -0.391±0.213 | 0.745±0.49   | 5.42E-03 |
| cg02131853 | 4  | 39034637  | <i>TMEM156</i>    | -0.148±0.346 | -1.307±0.505 | 5.44E-03 |
| cg01072821 | 8  | 10382165  | <i>PRSS55</i>     | 0.9±0.211    | -0.239±0.491 | 5.46E-03 |
| cg26162582 | 12 | 4918391   | <i>KCNA6</i>      | -3.461±0.77  | -1.025±1.053 | 5.46E-03 |
| cg08319404 | 3  | 24537435  | <i>THRB</i>       | -0.016±0.282 | -1.487±0.637 | 5.47E-03 |
| cg02254407 | 11 | 73357159  | <i>PLEKHB1</i>    | 0.61±0.189   | 2.006±0.586  | 5.50E-03 |
| cg11540692 | 6  | 100912072 | <i>SIM1</i>       | -1.714±0.203 | -0.713±0.437 | 5.50E-03 |
| cg00792849 | 15 | 35046610  | <i>GJD2</i>       | -3.677±0.608 | -1.409±1.001 | 5.51E-03 |
| cg02630888 | 4  | 15657820  | <i>FBXL5</i>      | 1.341±0.308  | 0.368±0.422  | 5.51E-03 |
| cg20876010 | 1  | 64971752  | <i>CACHD1</i>     | 0.021±0.219  | -1.032±0.46  | 5.52E-03 |
| cg03731616 | 3  | 123603618 | <i>MYLK</i>       | -2.659±0.384 | -1.413±0.543 | 5.52E-03 |
| cg10883303 | 7  | 27239024  | <i>HOXA13</i>     | -3.439±0.694 | 0.124±1.549  | 5.53E-03 |
| cg22395019 | 2  | 31361692  | <i>GALNT14</i>    | -2.947±0.253 | -3.691±0.318 | 5.53E-03 |

|            |    |           |                  |              |              |          |
|------------|----|-----------|------------------|--------------|--------------|----------|
| cg10896774 | 7  | 142636840 | <i>C7orf34</i>   | -1.163±0.304 | -2.485±0.583 | 5.55E-03 |
| cg25720804 | 5  | 170736389 | <i>TLX3</i>      | -2.659±0.572 | 0.667±1.434  | 5.57E-03 |
| cg10957151 | 2  | 176986956 | <i>HOXD9</i>     | -2.15±0.15   | -0.35±0.731  | 5.62E-03 |
| cg02189785 | 9  | 139891008 | <i>CLIC3</i>     | -1.357±0.283 | -3.029±0.723 | 5.65E-03 |
| cg24929834 | 22 | 29457241  | <i>C22orf31</i>  | 0.344±0.271  | 1.37±0.456   | 5.66E-03 |
| cg20664247 | 1  | 2345475   | <i>PEX10</i>     | 0.074±0.191  | -0.496±0.246 | 5.67E-03 |
| cg21665774 | 19 | 34790692  | <i>KIAA0355</i>  | 0.226±0.207  | 0.956±0.29   | 5.67E-03 |
| cg13870866 | 7  | 35293130  | <i>TBX20</i>     | -2.427±0.383 | -0.435±0.872 | 5.69E-03 |
| cg07033083 | 7  | 72424763  | <i>NSUN5P2</i>   | -2.224±0.198 | -3.07±0.377  | 5.87E-03 |
| cg07778029 | 7  | 27205114  | <i>HOXA9</i>     | -3.457±0.323 | -1.004±1.041 | 5.89E-03 |
| cg01354473 | 7  | 27204803  | <i>HOXA9</i>     | -2.279±0.466 | 0.196±1.088  | 5.98E-03 |
| cg26133068 | 22 | 24199008  | <i>SLC2A11</i>   | -1.153±0.341 | -2.1±0.402   | 6.05E-03 |
| cg27626299 | 7  | 27282431  | <i>EVX1</i>      | -3.036±0.233 | -0.73±0.962  | 6.07E-03 |
| cg16993794 | 22 | 24199328  | <i>SLC2A11</i>   | -3.569±0.434 | -4.561±0.329 | 6.08E-03 |
| cg23114594 | 10 | 13544648  | <i>BEND7</i>     | 1.035±0.3    | 2.173±0.512  | 6.19E-03 |
| cg18401406 | 13 | 37247537  | <i>SERTM1</i>    | 0.891±0.337  | 2.065±0.528  | 6.25E-03 |
| cg09872616 | 7  | 130126182 | <i>MEST</i>      | -0.682±0.232 | -1.792±0.496 | 6.25E-03 |
| cg06436504 | 3  | 99833735  | <i>CMSS1</i>     | 0.694±0.247  | 2.157±0.642  | 6.26E-03 |
| cg06745740 | 7  | 81399587  | <i>HGF</i>       | -2.857±0.323 | -1.132±0.764 | 6.26E-03 |
| cg01381846 | 7  | 27204785  | <i>HOXA9</i>     | -1.572±0.487 | 0.541±0.949  | 6.27E-03 |
| cg14991487 | 2  | 176987404 | <i>HOXD9</i>     | -3.56±0.59   | -0.53±1.347  | 6.28E-03 |
| cg01888566 | 7  | 130126513 | <i>MEST</i>      | -0.612±0.387 | -1.953±0.603 | 6.28E-03 |
| cg16842214 | 3  | 42727160  | <i>KLHL40</i>    | -0.483±0.321 | 0.305±0.31   | 6.31E-03 |
| cg02510853 | 16 | 3031707   | <i>PKMYT1</i>    | -0.615±0.279 | 0.874±0.662  | 6.36E-03 |
| cg09577651 | 20 | 1600705   | <i>SIRPB1</i>    | -0.095±0.29  | -1.127±0.466 | 6.36E-03 |
| cg21614638 | 4  | 100737821 | <i>DAPP1</i>     | 0.305±0.311  | -1.59±0.833  | 6.38E-03 |
| cg26366091 | 1  | 111770274 | <i>CHI3L2</i>    | -1.509±0.299 | -2.331±0.353 | 6.40E-03 |
| cg06059810 | 4  | 71587722  | <i>RUFY3</i>     | 1.276±0.122  | 2.052±0.299  | 6.41E-03 |
| cg23509869 | 6  | 31553441  | <i>LST1</i>      | -0.52±0.217  | -1.381±0.39  | 6.43E-03 |
| cg08744726 | 7  | 149323101 | <i>ZNF767</i>    | -0.282±0.205 | -1.442±0.515 | 6.48E-03 |
| cg22303211 | 13 | 112722171 | <i>SOX1</i>      | -1.276±0.177 | -0.266±0.449 | 6.54E-03 |
| cg27541541 | 6  | 22298146  | <i>PRL</i>       | 0.089±0.294  | 0.81±0.258   | 6.56E-03 |
| cg15842276 | 11 | 92702648  | <i>MTNR1B</i>    | -0.561±0.312 | 0.902±0.663  | 6.62E-03 |
| cg06817269 | 15 | 59909035  | <i>GCNT3</i>     | 2.108±0.207  | 0.638±0.642  | 6.63E-03 |
| cg16009558 | 6  | 101846707 | <i>GRIK2</i>     | -3.651±0.503 | -1.698±0.891 | 6.64E-03 |
| cg04956511 | 12 | 7056008   | <i>PTPN6</i>     | 0.321±0.253  | -1.122±0.643 | 6.64E-03 |
| cg11455040 | 1  | 205649941 | <i>SLC45A3</i>   | -3.632±0.276 | -4.481±0.381 | 6.64E-03 |
| cg18410627 | 9  | 129677882 | <i>RALGPS1</i>   | -3.448±0.292 | -4.297±0.376 | 6.65E-03 |
| cg03421687 | 3  | 50383251  | <i>ZMYND10</i>   | -2.553±0.696 | -4.326±0.732 | 6.66E-03 |
| cg10019507 | 20 | 23016315  | <i>SSTR4</i>     | 0.075±0.198  | 0.777±0.32   | 6.67E-03 |
| cg09952204 | 5  | 80256664  | <i>RASGRF2</i>   | -5.033±0.942 | -2.261±1.232 | 6.67E-03 |
| cg00066816 | 5  | 158758353 | <i>LOC285626</i> | -1.282±0.316 | -2.445±0.533 | 6.76E-03 |
| cg03909500 | 5  | 33936597  | <i>RXFP3</i>     | -3.79±0.332  | -1.823±0.877 | 6.76E-03 |
| cg10318258 | 14 | 24809759  | <i>RIPK3</i>     | 1.2±0.234    | -0.384±0.699 | 6.82E-03 |
| cg14008883 | 10 | 50818911  | <i>SLC18A3</i>   | -2.411±0.464 | -0.515±0.87  | 6.82E-03 |
| cg17998964 | 11 | 63655903  | <i>MARK2</i>     | -1.618±0.358 | -2.8±0.54    | 6.85E-03 |
| cg21130374 | 21 | 42734266  | <i>MX2</i>       | 0.031±0.289  | -2±0.895     | 6.86E-03 |
| cg25691167 | 7  | 19184961  | <i>FERD3L</i>    | -3.95±0.621  | -0.763±1.445 | 6.87E-03 |
| cg23147597 | 19 | 45174681  | <i>CEACAM19</i>  | 1.983±0.507  | 0.255±0.792  | 6.93E-03 |
| cg13302823 | 8  | 145559792 | <i>SCRT1</i>     | -1.16±0.283  | 0.349±0.684  | 6.95E-03 |
| cg18888403 | 1  | 24152774  | <i>HMGCL</i>     | 2.695±0.29   | 1.292±0.642  | 7.00E-03 |
| cg14701962 | 1  | 162348010 | <i>C1orf226</i>  | 0.726±0.302  | 1.879±0.533  | 7.00E-03 |
| cg23317501 | 5  | 35991215  | <i>UGT3A1</i>    | -2.992±0.382 | -0.765±1.004 | 7.01E-03 |
| cg18901940 | 10 | 69869364  | <i>MYPN</i>      | 0.454±0.221  | 1.215±0.315  | 7.02E-03 |
| cg00708598 | 13 | 53313895  | <i>LECT1</i>     | -2.154±0.221 | -1.025±0.514 | 7.04E-03 |
| cg04123507 | 12 | 52695270  | <i>KRT86</i>     | 0.276±0.234  | 1.944±0.738  | 7.06E-03 |
| cg09936839 | 19 | 4181854   | <i>SIRT6</i>     | 1.309±0.244  | 0.276±0.476  | 7.07E-03 |
| cg07123069 | 12 | 54367250  | <i>HOXC11</i>    | -2.915±0.424 | -0.244±1.199 | 7.07E-03 |
| cg06771126 | 4  | 57547699  | <i>HOPX</i>      | -0.912±0.33  | -2.239±0.614 | 7.08E-03 |
| cg26721264 | 18 | 74961727  | <i>GALR1</i>     | -3.987±0.47  | -1.727±1.034 | 7.09E-03 |
| cg05109049 | 17 | 29641333  | <i>EVI2B</i>     | 0.461±0.157  | -1.608±0.885 | 7.12E-03 |
| cg05130485 | 2  | 202098257 | <i>CASP8</i>     | -1.543±0.285 | -2.444±0.373 | 7.12E-03 |
| cg15037004 | 5  | 71803938  | <i>ZNF366</i>    | -0.836±0.151 | 0.144±0.44   | 7.13E-03 |
| cg18884741 | 7  | 66204797  | <i>RABGEF1</i>   | 1.791±0.303  | 0.581±0.562  | 7.14E-03 |
| cg15302379 | 10 | 102821848 | <i>KAZALD1</i>   | 1.359±0.104  | 0.656±0.315  | 7.14E-03 |
| cg08190291 | 21 | 28339442  | <i>ADAMTS5</i>   | -4.57±0.477  | -2.688±0.876 | 7.14E-03 |
| cg19399100 | 4  | 70519695  | <i>UGT2A1</i>    | 0.509±0.21   | 1.139±0.259  | 7.15E-03 |
| cg02806777 | 19 | 46526317  | <i>PGLYRP1</i>   | -1.01±0.373  | 0.625±0.756  | 7.15E-03 |
| cg03724463 | 3  | 42306524  | <i>CCK</i>       | -2.405±0.183 | -1.016±0.615 | 7.15E-03 |
| cg15633390 | 4  | 99851211  | <i>EIF4E</i>     | -0.915±0.388 | -2.723±0.833 | 7.16E-03 |

|            |    |           |                 |              |              |          |
|------------|----|-----------|-----------------|--------------|--------------|----------|
| cg11438428 | 10 | 23481594  | <i>PTF1A</i>    | -2.74±0.633  | -0.163±1.196 | 7.16E-03 |
| cg22418909 | 8  | 41166738  | <i>SFRP1</i>    | -2.878±0.73  | -0.897±0.875 | 7.16E-03 |
| cg03934354 | 5  | 34043140  | <i>C1QTNF3</i>  | 0.979±0.287  | 1.848±0.396  | 7.18E-03 |
| cg25363445 | 11 | 44326516  | <i>ALX4</i>     | -2.327±0.396 | -0.584±0.81  | 7.23E-03 |
| cg16873863 | 11 | 2921176   | <i>SLC22A18</i> | 1.046±0.187  | -0.632±0.737 | 7.23E-03 |
| cg02331561 | 16 | 2391081   | <i>ABCA17P</i>  | -3.569±0.463 | -4.731±0.491 | 7.23E-03 |
| cg08647446 | 4  | 74486298  | <i>RASSF6</i>   | -2.111±0.306 | -3.116±0.466 | 7.24E-03 |
| cg24058132 | 14 | 88459866  | <i>GALC</i>     | -1.114±0.164 | -1.668±0.258 | 7.26E-03 |
| cg14144305 | 11 | 44325960  | <i>ALX4</i>     | -3.439±0.405 | -1.165±1.042 | 7.27E-03 |
| cg15645309 | 14 | 75988747  | <i>BATF</i>     | -0.919±0.388 | -2.433±0.634 | 7.27E-03 |
| cg03099771 | 6  | 27215365  | <i>PRSS16</i>   | -0.644±0.251 | 0.379±0.478  | 7.28E-03 |
| cg15387123 | 9  | 139891058 | <i>CLIC3</i>    | -0.565±0.268 | -2.287±0.781 | 7.28E-03 |
| cg03667047 | 13 | 33589962  | <i>KL</i>       | -1.336±0.25  | 0.114±0.663  | 7.28E-03 |
| cg03958979 | 6  | 108486387 | <i>NR2E1</i>    | -1.754±0.459 | 0.741±1.148  | 7.29E-03 |
| cg01242619 | 8  | 145049472 | <i>PLEC</i>     | -1.765±0.368 | -2.996±0.573 | 7.29E-03 |
| cg12374721 | 17 | 46799640  | <i>PRAC</i>     | -3.017±0.411 | -0.124±1.299 | 7.29E-03 |
| cg04268405 | 10 | 73723221  | <i>CHST3</i>    | 0.814±0.228  | 2.038±0.564  | 7.30E-03 |
| cg08427977 | 10 | 50323832  | <i>VSTM4</i>    | -0.501±0.116 | -1.114±0.283 | 7.31E-03 |
| cg26555310 | 1  | 68914717  | <i>RPE65</i>    | 1.342±0.329  | 2.549±0.564  | 7.31E-03 |
| cg03294491 | 18 | 45458243  | <i>SMAD2</i>    | -0.87±0.354  | -2.133±0.59  | 7.32E-03 |
| cg07651914 | 7  | 100881986 | <i>CLDN15</i>   | 0.863±0.217  | 1.587±0.338  | 7.32E-03 |
| cg26771272 | 17 | 18163183  | <i>SMCR7</i>    | 1.683±0.258  | 0.454±0.572  | 7.33E-03 |
| cg03742214 | 12 | 107487383 | <i>CRY1</i>     | -5.792±0.522 | -4.396±0.62  | 7.33E-03 |
| cg22346765 | 6  | 41007522  | <i>UNC5CL</i>   | 1.731±0.235  | -0.363±0.929 | 7.38E-03 |
| cg20313722 | 19 | 47248003  | <i>FKRP</i>     | 0.744±0.172  | 1.319±0.27   | 7.39E-03 |
| cg13608094 | 11 | 69461236  | <i>CCND1</i>    | 2.682±0.393  | 3.544±0.303  | 7.39E-03 |
| cg07846220 | 18 | 7117680   | <i>LAMA1</i>    | -3.038±0.93  | -0.991±0.729 | 7.39E-03 |
| cg23752985 | 2  | 85803571  | <i>VAMP8</i>    | 0.729±0.416  | 2.077±0.63   | 7.39E-03 |
| cg16142218 | 8  | 23101221  | <i>CHMP7</i>    | 0.08±0.309   | -1.385±0.683 | 7.40E-03 |
| cg17982671 | 19 | 39735568  | <i>IFNL3</i>    | 1.155±0.247  | 1.968±0.381  | 7.41E-03 |
| cg07027075 | 4  | 39461721  | <i>LIAS</i>     | -1.895±0.196 | -2.942±0.43  | 7.41E-03 |
| cg03616357 | 4  | 156297942 | <i>MAP9</i>     | -3.51±0.253  | -4.474±0.455 | 7.41E-03 |
| cg23732024 | 8  | 74903801  | <i>LY96</i>     | -0.131±0.367 | -2.585±0.981 | 7.41E-03 |
| cg04569233 | 3  | 39321449  | <i>CX3CR1</i>   | 0.57±0.257   | -0.257±0.386 | 7.42E-03 |
| cg26153631 | 12 | 54379056  | <i>HOXC10</i>   | -1.023±0.105 | 0.116±0.501  | 7.45E-03 |
| cg18641050 | 10 | 102045846 | <i>BLOC1S2</i>  | -2.19±0.372  | -3.079±0.334 | 7.49E-03 |
| cg16098981 | 20 | 24449865  | <i>SYNDIG1</i>  | -4.065±0.559 | -1.481±1.213 | 7.50E-03 |
| cg01152019 | 2  | 177015044 | <i>MIR10B</i>   | -3.313±0.576 | -1.18±1.008  | 7.51E-03 |
| cg07703401 | 16 | 230341    | <i>HBQ1</i>     | -3.721±0.618 | -0.79±1.375  | 7.51E-03 |
| cg03755123 | 10 | 135043508 | <i>UTF1</i>     | -2.828±0.519 | -0.768±0.975 | 7.54E-03 |
| cg27504991 | 6  | 43022209  | <i>CUL7</i>     | 1.333±0.395  | 2.75±0.672   | 7.62E-03 |
| cg17412258 | 14 | 101193017 | <i>DLK1</i>     | -4.5±0.512   | -1.65±1.326  | 7.62E-03 |
| cg01355739 | 20 | 57416888  | <i>GNAS</i>     | 1.182±0.133  | 1.762±0.275  | 7.62E-03 |
| cg02994974 | 11 | 13984544  | <i>SPON1</i>    | -3.235±0.574 | -1.483±0.819 | 7.63E-03 |
| cg22462235 | 1  | 226129481 | <i>LEFTY2</i>   | -0.399±0.23  | 0.802±0.561  | 7.64E-03 |
| cg19352038 | 2  | 223164869 | <i>PAX3</i>     | -1.851±0.304 | 0.333±0.994  | 7.65E-03 |
| cg27478659 | 17 | 39769012  | <i>KRT16</i>    | 0.456±0.163  | -0.258±0.338 | 7.65E-03 |
| cg10521852 | 19 | 19739820  | <i>LPAR2</i>    | -0.418±0.308 | -1.585±0.554 | 7.66E-03 |
| cg13676215 | 7  | 17337976  | <i>AHR</i>      | -0.346±0.162 | -1.615±0.574 | 7.67E-03 |
| cg07780979 | 5  | 303287    | <i>AHRR</i>     | 3.213±0.317  | 4.033±0.365  | 7.70E-03 |
| cg15856055 | 10 | 135121295 | <i>ZNF511</i>   | -0.61±0.372  | -1.886±0.606 | 7.72E-03 |
| cg21513553 | 21 | 47518637  | <i>COL6A2</i>   | -4.307±0.874 | -1.77±1.179  | 7.75E-03 |
| cg18403361 | 14 | 38725750  | <i>CLEC14A</i>  | -1.2±0.341   | 0.097±0.62   | 7.93E-03 |
| cg27091787 | 3  | 50360690  | <i>HYAL2</i>    | -0.746±0.281 | 0.276±0.489  | 7.96E-03 |
| cg12559031 | 17 | 48046365  | <i>DLX4</i>     | -3.556±0.281 | -4.294±0.333 | 8.05E-03 |
| cg25942450 | 5  | 170736251 | <i>TLX3</i>     | -2.569±0.435 | 0.057±1.225  | 8.06E-03 |
| cg10604646 | 1  | 163172649 | <i>RGS5</i>     | -0.028±0.279 | 1.158±0.567  | 8.11E-03 |
| cg10217445 | 21 | 34397784  | <i>OLIG2</i>    | -3.089±0.307 | -1.019±0.96  | 8.25E-03 |
| cg07455975 | 2  | 175112849 | <i>OLA1</i>     | -3.485±0.427 | -4.491±0.424 | 8.28E-03 |
| cg23941599 | 5  | 114880796 | <i>FEM1C</i>    | -2.404±0.273 | -3.196±0.372 | 8.29E-03 |
| cg12953249 | 9  | 126118772 | <i>CRB2</i>     | 2.397±0.408  | 3.322±0.373  | 8.31E-03 |
| cg02989940 | 16 | 31539234  | <i>AHSP</i>     | 1.977±0.407  | 0.496±0.714  | 8.41E-03 |
| cg27429194 | 17 | 3099847   | <i>OR1A2</i>    | 0.434±0.322  | -0.315±0.313 | 8.48E-03 |
| cg10140638 | 2  | 220174207 | <i>PTPRN</i>    | -4.486±0.549 | -1.128±1.578 | 8.50E-03 |
| cg00229387 | 6  | 43445942  | <i>TJAP1</i>    | -1.199±0.13  | -1.8±0.289   | 8.51E-03 |
| cg06150803 | 13 | 24144257  | <i>TNFRSF19</i> | -1.695±0.339 | -0.451±0.541 | 8.66E-03 |
| cg01484156 | 8  | 102802615 | <i>NCALD</i>    | -0.138±0.241 | 1.448±0.655  | 8.70E-03 |
| cg26673195 | 17 | 41052729  | <i>G6PC</i>     | -0.149±0.177 | -1.424±0.595 | 8.83E-03 |
| cg04983977 | 1  | 200842145 | <i>GPR25</i>    | 0.52±0.127   | 1.255±0.349  | 8.90E-03 |
| cg26215428 | 4  | 88928251  | <i>PKD2</i>     | 1.193±0.24   | 1.975±0.379  | 8.90E-03 |

|            |    |           |                 |              |              |          |
|------------|----|-----------|-----------------|--------------|--------------|----------|
| cg22549408 | 18 | 57566300  | <i>PMAIP1</i>   | -0.619±0.257 | -1.418±0.385 | 8.95E-03 |
| cg23208152 | 3  | 50383134  | <i>ZMYND10</i>  | -1.502±0.722 | -3.235±0.759 | 8.99E-03 |
| cg17166338 | 5  | 1295969   | <i>TERT</i>     | 0.657±0.239  | 2.047±0.662  | 8.99E-03 |
| cg14506552 | 1  | 11918954  | <i>NPPB</i>     | -1.413±0.395 | -0.375±0.479 | 9.00E-03 |
| cg24528523 | 11 | 2923808   | <i>SLC22A18</i> | -1.975±0.183 | -2.385±0.168 | 9.04E-03 |
| cg20822579 | 14 | 24809073  | <i>RIPK3</i>    | -2.163±0.34  | -3.46±0.632  | 9.04E-03 |
| cg17525406 | 1  | 4715520   | <i>AJAP1</i>    | -2.854±0.753 | -0.103±1.344 | 9.04E-03 |
| cg08785215 | 3  | 57993979  | <i>FLNB</i>     | -4.099±0.38  | -4.998±0.391 | 9.05E-03 |
| cg05244766 | 11 | 67350499  | <i>GSTP1</i>    | 1.901±0.304  | 0.438±0.708  | 9.06E-03 |
| cg25563456 | 11 | 32456069  | <i>WT1</i>      | -4.151±0.383 | -1.62±1.197  | 9.06E-03 |
| cg03266453 | 2  | 119606055 | <i>EN1</i>      | -3.223±0.364 | -1.421±0.87  | 9.07E-03 |
| cg27496506 | 15 | 43559170  | <i>TGM5</i>     | 1.418±0.23   | -0.04±0.691  | 9.08E-03 |
| cg00489401 | 5  | 180075875 | <i>FLT4</i>     | -2.906±0.77  | -0.688±1.058 | 9.09E-03 |
| cg08539991 | 19 | 36203832  | <i>ZBTB32</i>   | 1.998±0.274  | 0.965±0.505  | 9.11E-03 |
| cg00005847 | 2  | 177029073 | <i>HOXD3</i>    | -2.042±0.238 | -0.316±0.813 | 9.11E-03 |
| cg19789466 | 12 | 113344923 | <i>OAS1</i>     | -3.025±0.222 | -4.127±0.534 | 9.12E-03 |
| cg03270167 | 2  | 238768916 | <i>RAMP1</i>    | -2.333±0.569 | -3.629±0.545 | 9.12E-03 |
| cg24447890 | 15 | 75105144  | <i>LMAN1L</i>   | 0.944±0.2    | 1.845±0.439  | 9.12E-03 |
| cg05221167 | 19 | 9609397   | <i>ZNF560</i>   | -3.339±0.427 | -0.884±1.176 | 9.13E-03 |
| cg01668383 | 13 | 37679573  | <i>CSNK1A1L</i> | 1.229±0.129  | 0.64±0.287   | 9.13E-03 |
| cg02332525 | 3  | 6903153   | <i>GRM7</i>     | -1.499±0.561 | 0.034±0.723  | 9.14E-03 |
| cg11783497 | 2  | 113875292 | <i>IL1RN</i>    | 1.248±0.413  | -0.098±0.657 | 9.18E-03 |
| cg13603171 | 6  | 132723164 | <i>MOXD1</i>    | -1.927±0.304 | -0.31±0.782  | 9.20E-03 |
| cg00095526 | 1  | 201081686 | <i>CACNA1S</i>  | 0.877±0.109  | 1.446±0.275  | 9.20E-03 |
| cg16708281 | 2  | 114256673 | <i>FOXD4L1</i>  | -0.687±0.201 | 0.057±0.365  | 9.21E-03 |
| cg03802191 | 1  | 234615169 | <i>TARBP1</i>   | 0.777±0.094  | -0.156±0.433 | 9.21E-03 |
| cg12600197 | 15 | 75639339  | <i>NEIL1</i>    | -1.192±0.226 | -1.731±0.238 | 9.21E-03 |
| cg27409364 | 11 | 17757743  | <i>KCNC1</i>    | -0.855±0.497 | 0.856±0.84   | 9.23E-03 |
| cg10709021 | 8  | 30890108  | <i>PURG</i>     | -1.778±0.277 | -0.346±0.695 | 9.28E-03 |
| cg11921829 | 1  | 157746930 | <i>FCRL2</i>    | 1.128±0.389  | -0.179±0.642 | 9.30E-03 |
| cg19324627 | 11 | 116708329 | <i>APOA1</i>    | 1.391±0.225  | 2.271±0.434  | 9.31E-03 |
| cg04743650 | 1  | 101185070 | <i>VCAM1</i>    | -0.479±0.165 | 0.442±0.394  | 9.31E-03 |
| cg07369274 | 3  | 58200599  | <i>0</i>        | -0.559±0.362 | -1.774±0.598 | 9.41E-03 |
| cg06615154 | 1  | 153522553 | <i>S100A3</i>   | 0.738±0.319  | 1.752±0.497  | 9.45E-03 |
| cg13449778 | 1  | 179712298 | <i>FAM163A</i>  | -4.508±0.456 | -2.061±1.19  | 9.50E-03 |
| cg22534509 | 12 | 123215119 | <i>HCAR1</i>    | -0.916±0.221 | -1.773±0.424 | 9.52E-03 |
| cg26060255 | 20 | 3025968   | <i>MRPS26</i>   | -0.802±0.166 | -1.545±0.366 | 9.53E-03 |
| cg03561565 | 8  | 99438624  | <i>KCNS2</i>    | -2.879±0.288 | -1.327±0.58  | 9.54E-03 |
| cg06690548 | 4  | 139162808 | <i>SLC7A11</i>  | 2.822±0.391  | 0.682±1.039  | 9.55E-03 |
| cg24169822 | 7  | 27170994  | <i>HOXA4</i>    | -1.354±0.428 | -0.184±0.56  | 9.58E-03 |
| cg03386869 | 13 | 102104848 | <i>ITGBL1</i>   | 1.217±0.383  | 2.255±0.496  | 9.65E-03 |
| cg24670715 | 8  | 6420506   | <i>ANGPT2</i>   | -0.251±0.248 | 0.989±0.608  | 9.65E-03 |
| cg19228118 | 1  | 34631324  | <i>CSMD2</i>    | -3.48±0.501  | -1.895±0.781 | 9.68E-03 |
| cg17966192 | 2  | 108994116 | <i>SULT1C4</i>  | -2.373±0.419 | -1.131±0.607 | 9.69E-03 |
| cg25802093 | 10 | 22634038  | <i>SPAG6</i>    | -2.193±0.355 | 0.393±1.236  | 9.72E-03 |
| cg08747377 | 16 | 82660670  | <i>CDH13</i>    | -4.431±0.595 | -1.737±1.331 | 9.74E-03 |
| cg27214774 | 20 | 49253710  | <i>FAM65C</i>   | 0.362±0.239  | 1.776±0.687  | 9.81E-03 |
| cg18482268 | 5  | 145718965 | <i>POU4F3</i>   | -3.307±0.343 | -1.028±1.101 | 9.93E-03 |
| cg15177359 | 17 | 73840750  | <i>UNC13D</i>   | -1.24±0.2    | -2.182±0.466 | 9.94E-03 |
| cg18236477 | 13 | 26043066  | <i>ATP8A2</i>   | -2.456±0.528 | -0.029±1.202 | 9.94E-03 |
| cg26191951 | 14 | 21423466  | <i>RNASE2</i>   | 0.249±0.132  | -0.34±0.292  | 9.95E-03 |
| cg13645078 | 1  | 201438647 | <i>PHLDA3</i>   | -4.131±0.246 | -3.421±0.347 | 9.95E-03 |
| cg01601573 | 4  | 144256835 | <i>GAB1</i>     | -0.056±0.099 | -0.671±0.299 | 9.97E-03 |
| cg17945001 | 1  | 18434118  | <i>IGSF21</i>   | -2.462±0.475 | -1.046±0.697 | 9.99E-03 |

<sup>a</sup>Probe IDs for the Infinium HumanMethylation27 BeadChip (Illumina). <sup>b</sup>National Center for Biotechnology Information (NCBI) Database (Genome Build 37).

Supplementary Table 5E. The 102 probes showing significant differences in DNA methylation levels between adjacent normal lung tissue (N) samples and tumorous tissue (T) samples from patients belonging to the HER2 mutation group.

| Probe ID <sup>a</sup> | Chromosome | Position <sup>b</sup> | Gene symbol        | M-values (mean±SD) |              | FDR, q   |
|-----------------------|------------|-----------------------|--------------------|--------------------|--------------|----------|
|                       |            |                       |                    | N                  | T            |          |
| cg17525406            | 1          | 4715520               | <i>AJAP1</i>       | -3.531±0.135       | 0.54±0.105   | 3.69E-04 |
| cg11172423            | 1          | 43205623              | <i>CLDN19</i>      | 0.863±0.134        | 2.404±0.105  | 4.14E-03 |
| cg11921829            | 1          | 157746930             | <i>FCRL2</i>       | 0.828±0.122        | -0.624±0.09  | 4.18E-03 |
| cg05840031            | 11         | 31832353              | <i>PAX6</i>        | -2.447±0.062       | -0.095±0.127 | 4.26E-03 |
| cg03734874            | 14         | 105071382             | <i>TMEM179</i>     | -1.795±0.17        | 0.408±0.122  | 4.28E-03 |
| cg23290344            | 8          | 24771466              | <i>NEFM</i>        | -3.134±0.322       | 0.3±0.315    | 4.30E-03 |
| cg20023231            | 16         | 22825282              | <i>HS3ST2</i>      | -3.732±0.146       | -1.022±0.216 | 4.31E-03 |
| cg13262687            | 4          | 147559579             | <i>POU4F2</i>      | -3.017±0.153       | -0.867±0.17  | 4.35E-03 |
| cg12448933            | 17         | 72667378              | <i>RAB37</i>       | -2.415±0.185       | -0.024±0.229 | 4.41E-03 |
| cg20028470            | 2          | 27530829              | <i>UCN</i>         | -0.352±0.048       | 0.217±0.042  | 4.45E-03 |
| cg14546153            | 20         | 57090315              | <i>APCDD1L-AS1</i> | -3.29±0.196        | -1.134±0.179 | 4.47E-03 |
| cg10660256            | 5          | 78407683              | <i>BHMT</i>        | -2.624±0.114       | -0.012±0.189 | 4.47E-03 |
| cg04072323            | 2          | 229046325             | <i>SPHKAP</i>      | -3.807±0.172       | -1.158±0.213 | 4.50E-03 |
| cg17783509            | 4          | 41751001              | <i>PHOX2B</i>      | -2.305±0.104       | -0.964±0.128 | 4.50E-03 |
| cg23828595            | 10         | 52833610              | <i>PRKG1</i>       | -4.671±0.156       | -2.659±0.148 | 4.51E-03 |
| cg14225485            | 2          | 14772568              | <i>FAM84A</i>      | -3.667±0.199       | -1.394±0.215 | 4.51E-03 |
| cg12699371            | 18         | 74961424              | <i>GALR1</i>       | -3.472±0.159       | -1.042±0.187 | 4.52E-03 |
| cg27652350            | 15         | 101420989             | <i>ALDH1A3</i>     | -2.423±0.237       | 0.203±0.254  | 4.53E-03 |
| cg08441806            | 10         | 134599149             | <i>NKX6-2</i>      | -1.304±0.152       | 0.378±0.14   | 4.56E-03 |
| cg26609631            | 13         | 28366814              | <i>GSX1</i>        | -2.788±0.267       | 0.304±0.218  | 4.61E-03 |
| cg12847373            | 13         | 78493349              | <i>EDNRB</i>       | -5.058±0.156       | -3.214±0.171 | 4.61E-03 |
| cg18952647            | 15         | 83953744              | <i>BNC1</i>        | -3.945±0.347       | 0.1±0.385    | 4.67E-03 |
| cg08118311            | 18         | 76740401              | <i>SALL3</i>       | -2.875±0.248       | -0.058±0.178 | 4.69E-03 |
| cg26162582            | 12         | 4918391               | <i>KCNA6</i>       | -3.963±0.351       | -0.156±0.339 | 4.69E-03 |
| cg22231902            | 2          | 119604901             | <i>EN1</i>         | -3.732±0.236       | -0.355±0.289 | 4.73E-03 |
| cg20792294            | 11         | 2165425               | <i>IGF2-AS</i>     | -3.455±0.265       | -0.434±0.181 | 4.76E-03 |
| cg11657808            | 1          | 237205950             | <i>RYR2</i>        | -3.749±0.253       | 0.376±0.306  | 5.04E-03 |
| cg14144305            | 11         | 44325960              | <i>ALX4</i>        | -3.475±0.219       | -0.491±0.222 | 5.04E-03 |
| cg08109815            | 6          | 142409831             | <i>NMBR</i>        | -1.555±0.154       | -0.018±0.137 | 5.11E-03 |
| cg16954341            | 6          | 25652381              | <i>SCGN</i>        | -1.956±0.172       | -0.121±0.185 | 5.23E-03 |
| cg27626299            | 7          | 27282431              | <i>EVX1</i>        | -2.959±0.206       | 0.06±0.291   | 5.26E-03 |
| cg04549333            | 11         | 44325823              | <i>ALX4</i>        | -3.41±0.189        | -0.295±0.116 | 5.96E-03 |
| cg07536847            | 1          | 18957232              | <i>PAX7</i>        | -3.312±0.152       | -0.447±0.085 | 6.27E-03 |
| cg01381846            | 7          | 27204785              | <i>HOXA9</i>       | -1.332±0.285       | 1.356±0.249  | 6.32E-03 |
| cg24199834            | 4          | 147560126             | <i>POU4F2</i>      | -2.818±0.274       | -0.238±0.228 | 6.48E-03 |
| cg26316946            | 6          | 101846967             | <i>GRIK2</i>       | -2.377±0.143       | -0.047±0.162 | 6.71E-03 |
| cg00662556            | 18         | 74963364              | <i>GALR1</i>       | -1.945±0.203       | -0.071±0.203 | 6.73E-03 |
| cg18640030            | 8          | 67090752              | <i>CRH</i>         | 0.447±0.15         | 1.872±0.15   | 6.73E-03 |
| cg23130254            | 2          | 176964588             | <i>HOXD12</i>      | -3.084±0.306       | -0.251±0.241 | 6.78E-03 |
| cg17861230            | 19         | 18343901              | <i>PDE4C</i>       | -1.515±0.216       | 0.801±0.259  | 6.85E-03 |
| cg15835825            | 7          | 154862030             | <i>HTR5A</i>       | -4.517±0.325       | -0.832±0.412 | 6.87E-03 |
| cg20587394            | 12         | 54332209              | <i>HOXC13</i>      | -3.716±0.168       | -1.514±0.245 | 6.87E-03 |
| cg18270343            | 8          | 143748005             | <i>JRK</i>         | 0.494±0.102        | 1.4±0.072    | 6.89E-03 |
| cg25875213            | 19         | 38183055              | <i>ZNFR1</i>       | -4.386±0.438       | -0.066±0.297 | 6.89E-03 |
| cg10486998            | 18         | 74961787              | <i>GALR1</i>       | -3.316±0.272       | -0.385±0.334 | 6.89E-03 |
| cg02164046            | 3          | 187388148             | <i>SST</i>         | -3.18±0.263        | -0.086±0.343 | 6.91E-03 |
| cg07175883            | 2          | 176957908             | <i>HOXD13</i>      | -4.736±0.41        | -0.804±0.284 | 6.92E-03 |
| cg00579393            | 2          | 79316004              | <i>REG1B</i>       | 2.229±0.166        | 0.657±0.111  | 6.94E-03 |
| cg27549944            | 1          | 204328843             | <i>PLEKHA6</i>     | -2.451±0.216       | -0.147±0.269 | 6.94E-03 |
| cg22660578            | 17         | 35294029              | <i>LHX1</i>        | -2.588±0.319       | 0.569±0.183  | 6.95E-03 |
| cg01868128            | 1          | 152483675             | <i>LCE5A</i>       | 0.519±0.085        | -0.295±0.084 | 6.95E-03 |
| cg02757432            | 10         | 125426048             | <i>GPR26</i>       | -1.256±0.146       | 0.497±0.203  | 6.95E-03 |
| cg03699566            | 11         | 71900652              | <i>FOLR1</i>       | -0.136±0.065       | 0.784±0.096  | 6.97E-03 |
| cg18555440            | 11         | 17741687              | <i>MYOD1</i>       | -2.384±0.26        | 0.048±0.164  | 6.98E-03 |
| cg13549845            | 4          | 93225960              | <i>GRID2</i>       | -2.942±0.205       | -1.201±0.19  | 7.03E-03 |
| cg05056120            | 5          | 158527702             | <i>EBF1</i>        | -2.65±0.178        | -0.981±0.194 | 7.04E-03 |
| cg24101578            | 20         | 44880263              | <i>CDH22</i>       | -1.796±0.201       | 0.022±0.186  | 7.05E-03 |
| cg15748507            | 10         | 120354627             | <i>PRLHR</i>       | -1.024±0.108       | 0.61±0.174   | 7.06E-03 |
| cg22471346            | 17         | 10101473              | <i>GAS7</i>        | -4.686±0.442       | -0.664±0.469 | 7.06E-03 |
| cg10175795            | 10         | 133109194             | <i>TCERG1L</i>     | -2.404±0.167       | -0.701±0.189 | 7.08E-03 |
| cg26050734            | 1          | 151689032             | <i>CELF3</i>       | -0.999±0.089       | -0.154±0.097 | 7.09E-03 |
| cg01354473            | 7          | 27204803              | <i>HOXA9</i>       | -2.377±0.346       | 0.639±0.324  | 7.09E-03 |
| cg22359606            | 2          | 182545492             | <i>NEUROD1</i>     | -3.18±0.164        | -0.947±0.244 | 7.11E-03 |
| cg26282384            | 5          | 140767200             | <i>PCDHGB4</i>     | -3.345±0.21        | -1.503±0.161 | 7.13E-03 |
| cg24879335            | 3          | 133465180             | <i>TF</i>          | -2.961±0.159       | -0.845±0.232 | 7.14E-03 |
| cg18674980            | 8          | 86350581              | <i>CA3</i>         | -3.939±0.193       | -1.4±0.278   | 7.18E-03 |
| cg10275770            | 17         | 62084205              | <i>ICAM2</i>       | -0.444±0.137       | 0.772±0.146  | 7.36E-03 |

|            |    |           |                |              |              |          |
|------------|----|-----------|----------------|--------------|--------------|----------|
| cg09786257 | 5  | 95768695  | <i>PCSK1</i>   | -1.289±0.069 | -0.026±0.126 | 7.37E-03 |
| cg07703401 | 16 | 230341    | <i>HBQ1</i>    | -3.517±0.403 | -0.147±0.296 | 7.41E-03 |
| cg16571399 | 15 | 62939540  | <i>TLN2</i>    | 3.63±0.097   | 2.803±0.097  | 7.45E-03 |
| cg10114327 | 4  | 122301573 | <i>QRFPR</i>   | -1.363±0.167 | 0.021±0.127  | 7.55E-03 |
| cg07442479 | 5  | 37839769  | <i>GDNF</i>    | -2.287±0.259 | -0.189±0.22  | 7.57E-03 |
| cg21461100 | 19 | 46477338  | <i>NOVA2</i>   | -2.908±0.291 | -0.33±0.317  | 7.72E-03 |
| cg03963198 | 5  | 1882871   | <i>IRX4</i>    | -2.737±0.376 | 0.56±0.238   | 8.08E-03 |
| cg07109287 | 9  | 126774073 | <i>LHX2</i>    | -2.91±0.301  | 0.479±0.418  | 8.28E-03 |
| cg17267907 | 8  | 6838024   | <i>DEFA1B</i>  | 1.259±0.113  | 0.208±0.133  | 8.30E-03 |
| cg14859460 | 5  | 178422244 | <i>GRM6</i>    | -3.176±0.422 | 0.161±0.386  | 8.32E-03 |
| cg08251399 | 2  | 31457608  | <i>EHD3</i>    | -0.236±0.09  | 0.678±0.116  | 8.39E-03 |
| cg02245378 | 2  | 223161771 | <i>CCDC140</i> | -2.548±0.209 | -0.361±0.274 | 8.40E-03 |
| cg23771603 | 10 | 26223310  | <i>MYO3A</i>   | -3.632±0.331 | -0.997±0.316 | 8.49E-03 |
| cg08369065 | 8  | 11562683  | <i>GATA4</i>   | -3.566±0.15  | -0.852±0.282 | 8.63E-03 |
| cg24396745 | 15 | 73660614  | <i>HCN4</i>    | -2.953±0.333 | -0.359±0.303 | 8.67E-03 |
| cg13807496 | 11 | 44332540  | <i>ALX4</i>    | -3.132±0.153 | -1.389±0.219 | 8.73E-03 |
| cg06493994 | 6  | 25652602  | <i>SCGN</i>    | -2.957±0.247 | -1.086±0.2   | 8.82E-03 |
| cg21846903 | 17 | 26697281  | <i>VTN</i>     | -1.002±0.054 | -0.214±0.09  | 8.83E-03 |
| cg04623955 | 14 | 102026376 | <i>DIO3</i>    | -2.642±0.183 | -0.641±0.255 | 8.86E-03 |
| cg00234616 | 2  | 74740572  | <i>TLX2</i>    | -1.797±0.156 | -0.119±0.217 | 8.86E-03 |
| cg06910100 | 19 | 17375091  | <i>USHBP1</i>  | 1.247±0.113  | 2.297±0.137  | 8.88E-03 |
| cg22143352 | 14 | 75897841  | <i>JDP2</i>    | -0.262±0.122 | 0.659±0.1    | 8.90E-03 |
| cg25044651 | 5  | 115298720 | <i>AQPEP</i>   | -1.958±0.28  | 0.149±0.234  | 8.91E-03 |
| cg15736165 | 15 | 83951732  | <i>BNC1</i>    | -2.412±0.189 | -0.842±0.203 | 8.92E-03 |
| cg06818777 | 17 | 48546620  | <i>CHAD</i>    | -1.348±0.187 | 0.092±0.176  | 8.95E-03 |
| cg00333226 | 7  | 49813763  | <i>VWC2</i>    | -2.744±0.312 | -0.382±0.257 | 9.04E-03 |
| cg19064258 | 16 | 22826117  | <i>HS3ST2</i>  | -2.704±0.219 | 0.054±0.077  | 9.14E-03 |
| cg00546491 | 7  | 32111062  | <i>PDE1C</i>   | -1.268±0.124 | -0.206±0.142 | 9.23E-03 |
| cg11946503 | 5  | 134870514 | <i>NEUROG1</i> | -2.658±0.123 | -0.661±0.085 | 9.44E-03 |
| cg10362591 | 16 | 55689865  | <i>SLC6A2</i>  | -3.58±0.388  | -0.699±0.301 | 9.60E-03 |
| cg24243265 | 8  | 130799851 | <i>GSDMC</i>   | 1.63±0.114   | 0.76±0.08    | 9.63E-03 |
| cg02501779 | 20 | 54579355  | <i>CBLN4</i>   | -3.86±0.281  | -1.584±0.307 | 9.80E-03 |
| cg19576304 | 18 | 56940022  | <i>RAX</i>     | -3.089±0.223 | -0.596±0.327 | 9.89E-03 |
| cg12530080 | 5  | 22141639  | <i>PMCHL1</i>  | 0.981±0.13   | -0.126±0.152 | 9.97E-03 |
| cg20792062 | 12 | 5153288   | <i>KCNA5</i>   | -2.171±0.245 | -0.226±0.155 | 9.99E-03 |

<sup>a</sup>Probe IDs for the Infinium HumanMethylation27 BeadChip (Illumina). <sup>b</sup>National Center for Biotechnology Information (NCBI) Database (Genome Build 37).

Supplementary Table 5F. The 8,907 probes showing significant differences in DNA methylation levels between adjacent normal lung tissue (N) samples and tumorous tissue (T) samples from patients belonging to the pan-negative group.

| Probe ID <sup>a</sup> | Chromosome | Position <sup>b</sup> | Gene symbol | M-values (mean±SD) |              | FDR, q   |
|-----------------------|------------|-----------------------|-------------|--------------------|--------------|----------|
|                       |            |                       |             | N                  | T            |          |
| cg01354473            | 7          | 27204803              | HOXA9       | -2.201±0.546       | 0.332±0.657  | 9.61E-39 |
| cg26521404            | 7          | 27204981              | HOXA9       | -2.094±0.84        | 0.712±0.64   | 3.72E-34 |
| cg27009703            | 7          | 27204894              | HOXA9       | -0.77±0.354        | 0.728±0.496  | 5.46E-31 |
| cg01280080            | 2          | 216177276             | ATIC        | -1.518±0.447       | -3.233±0.562 | 6.04E-31 |
| cg25720804            | 5          | 170736389             | TLX3        | -2.689±0.806       | 0.385±1.013  | 6.85E-31 |
| cg24441911            | 12         | 7280988               | RBP5        | 1.435±0.337        | 2.648±0.392  | 8.18E-31 |
| cg06766367            | 16         | 67062687              | CBFB        | -2.035±0.321       | -3.341±0.461 | 3.04E-29 |
| cg01381846            | 7          | 27204785              | HOXA9       | -1.557±0.442       | 0.724±0.809  | 3.77E-29 |
| cg09325711            | 7          | 39662764              | RALA        | -2.435±0.422       | -4.145±0.614 | 6.51E-29 |
| cg02919422            | 8          | 55370544              | SOX17       | -1.784±0.472       | 0.109±0.678  | 6.82E-29 |
| cg27409364            | 11         | 17757743              | KCNC1       | -0.594±0.405       | 0.736±0.459  | 1.59E-28 |
| cg12003230            | 21         | 44899139              | LINC00313   | 0.899±0.329        | 1.989±0.382  | 2.92E-28 |
| cg23130254            | 2          | 176964588             | HOXD12      | -2.819±0.504       | -0.549±0.855 | 1.22E-27 |
| cg26799474            | 2          | 202098951             | CASP8       | 0.655±0.385        | -1.267±0.736 | 5.10E-27 |
| cg06491116            | 11         | 118122715             | MPZL3       | -1.568±0.413       | -3.084±0.592 | 2.86E-26 |
| cg26069745            | 7          | 27142200              | HOXA2       | -2.174±0.347       | -0.044±0.827 | 4.05E-26 |
| cg18343862            | 11         | 10590003              | LYVE1       | 1.832±0.3          | 2.685±0.304  | 5.05E-26 |
| cg13153865            | 8          | 90914101              | OSGIN2      | -2.973±0.337       | -4.059±0.42  | 7.19E-26 |
| cg26626042            | 6          | 32151594              | AGER        | 1.304±0.291        | 2.191±0.336  | 7.69E-26 |
| cg12782180            | 7          | 127880932             | LEP         | -0.38±0.394        | 1.113±0.598  | 8.97E-26 |
| cg17241310            | 1          | 91182856              | BARHL2      | -2.611±0.543       | -0.306±0.936 | 1.46E-25 |
| cg27389185            | 19         | 38042123              | ZNF571-AS1  | -1.519±0.322       | -0.136±0.565 | 2.19E-25 |
| cg22660578            | 17         | 35294029              | LHX1        | -2.52±0.806        | 0.078±1.033  | 2.74E-25 |
| cg27626299            | 7          | 27282431              | EVX1        | -2.926±0.354       | -0.64±0.918  | 3.26E-25 |
| cg25942450            | 5          | 170736251             | TLX3        | -2.381±0.465       | -0.249±0.877 | 3.39E-25 |
| cg08118311            | 18         | 76740401              | SALL3       | -2.878±0.85        | -0.575±0.829 | 3.46E-25 |
| cg20644981            | 4          | 152020400             | RPS3A       | -2.204±0.338       | -3.636±0.591 | 3.60E-25 |
| cg03975694            | 19         | 38042472              | ZNF540      | -2.025±0.403       | 0.022±0.842  | 4.13E-25 |
| cg19456540            | 14         | 60976285              | SIX6        | -4.107±0.684       | -0.962±1.303 | 4.41E-25 |
| cg18555440            | 11         | 17741687              | MYOD1       | -2.295±0.565       | -0.526±0.706 | 4.50E-25 |
| cg07533148            | 1          | 248020812             | TRIM58      | -3.94±1.109        | -0.217±1.514 | 4.51E-25 |
| cg12111714            | 13         | 26043472              | ATP8A2      | -1.546±0.445       | 0.591±0.89   | 6.88E-25 |
| cg21115990            | 11         | 68079081              | LRP5        | 0.67±0.324         | 1.624±0.375  | 7.22E-25 |
| cg14287742            | 1          | 169335773             | NME7        | 1.516±0.479        | 2.782±0.458  | 7.35E-25 |
| cg05521696            | 12         | 8025495               | SLC2A14     | -2.419±0.478       | -0.349±0.872 | 1.10E-24 |
| cg08109815            | 6          | 142409831             | NMBR        | -1.262±0.334       | -0.116±0.478 | 1.24E-24 |
| cg18722841            | 11         | 71954982              | PHOX2A      | -3.879±0.693       | -1.2±1.13    | 1.24E-24 |
| cg06627364            | 2          | 87755088              | LINC00152   | -2.974±0.492       | -4.297±0.497 | 1.30E-24 |
| cg03934354            | 5          | 34043140              | C1QTNF3     | 0.974±0.278        | 1.87±0.371   | 1.52E-24 |
| cg12467090            | 1          | 204459139             | PIK3C2B     | 1.112±0.262        | 1.916±0.328  | 1.61E-24 |
| cg15748507            | 10         | 120354627             | PRLHR       | -0.918±0.371       | 0.601±0.647  | 1.79E-24 |
| cg10235817            | 4          | 3768555               | ADRA2C      | -1.681±0.524       | -0.04±0.682  | 2.79E-24 |
| cg15540820            | 3          | 27765283              | EOMES       | -3.151±0.382       | -0.552±1.084 | 2.92E-24 |
| cg02813863            | 12         | 12938287              | APOLD1      | 1.13±0.265         | 1.944±0.337  | 3.04E-24 |
| cg22815110            | 1          | 63788933              | FOXD3       | -2.316±0.667       | -0.276±0.843 | 3.09E-24 |
| cg02994956            | 22         | 29876534              | NEFH        | -0.801±0.382       | 0.451±0.529  | 3.84E-24 |
| cg23207990            | 4          | 154710535             | SFRP2       | -3.216±0.443       | -0.703±1.074 | 4.78E-24 |
| cg03958979            | 6          | 108486387             | NR2E1       | -1.49±0.422        | 0.544±0.877  | 4.80E-24 |
| cg19352038            | 2          | 223164869             | PAX3        | -1.777±0.345       | 0.087±0.801  | 5.46E-24 |
| cg26316946            | 6          | 101846967             | GRIK2       | -2.405±0.413       | -0.587±0.793 | 7.77E-24 |
| cg07403255            | 2          | 114036170             | PAX8        | 0.342±0.214        | 1.035±0.298  | 1.07E-23 |
| cg01261503            | 17         | 62493599              | POLG2       | -1.786±0.357       | -2.827±0.435 | 1.11E-23 |
| cg15191648            | 18         | 76740262              | SALL3       | -2.298±0.835       | -0.236±0.758 | 1.49E-23 |
| cg11450827            | 22         | 19513006              | CLDN5       | 0.302±0.38         | 1.468±0.499  | 1.61E-23 |
| cg20903926            | 1          | 55271677              | C1orf177    | 1.87±0.524         | 3.322±0.605  | 3.02E-23 |
| cg23317501            | 5          | 35991215              | UGT3A1      | -2.727±0.361       | -0.878±0.821 | 3.09E-23 |
| cg09871315            | 7          | 27142682              | HOXA2       | -2.552±0.452       | -0.266±1.018 | 3.50E-23 |
| cg05350879            | 4          | 88451223              | SPARCL1     | 0.415±0.339        | 1.526±0.49   | 3.51E-23 |
| cg13870866            | 7          | 35293130              | TBX20       | -2.263±0.401       | -0.336±0.861 | 3.52E-23 |
| cg14333454            | 1          | 27189298              | SFN         | 0.005±0.389        | -1.148±0.499 | 4.37E-23 |
| cg23095584            | 2          | 237077704             | GBX2        | -2.35±0.409        | -0.617±0.78  | 4.64E-23 |
| cg21604615            | 1          | 27668610              | SYTL1       | -0.692±0.421       | -2.518±0.825 | 5.33E-23 |
| cg20959866            | 1          | 4714008               | AJAP1       | -3.053±0.568       | -0.622±1.1   | 5.85E-23 |

|            |    |           |                  |              |              |          |
|------------|----|-----------|------------------|--------------|--------------|----------|
| cg16731240 | 19 | 52391250  | <i>ZNF577</i>    | -1.942±0.669 | 0.753±1.222  | 6.74E-23 |
| cg23290344 | 8  | 24771466  | <i>NEFM</i>      | -2.914±0.842 | -0.322±1.15  | 9.06E-23 |
| cg17186803 | 11 | 118023038 | <i>SCN4B</i>     | -1.488±0.342 | -0.41±0.482  | 1.01E-22 |
| cg10078415 | 16 | 20775011  | <i>ACSM3</i>     | -1.762±0.352 | -2.888±0.505 | 1.02E-22 |
| cg03177025 | 2  | 28112917  | <i>RBKS</i>      | -1.68±0.505  | -2.826±0.385 | 1.03E-22 |
| cg07778029 | 7  | 27205114  | <i>HOXA9</i>     | -3.323±0.388 | -0.864±1.104 | 1.21E-22 |
| cg00948500 | 21 | 32006706  | <i>KRTAP20-2</i> | 0.475±0.305  | -0.776±0.575 | 1.44E-22 |
| cg14991487 | 2  | 176987404 | <i>HOXD9</i>     | -3.384±0.611 | -0.372±1.379 | 1.51E-22 |
| cg15868302 | 1  | 47900327  | <i>FOXD2-AS1</i> | -0.963±0.376 | 0.562±0.702  | 1.57E-22 |
| cg22134325 | 11 | 66188745  | <i>NPAS4</i>     | -1.197±0.297 | 0.249±0.663  | 1.59E-22 |
| cg13323752 | 12 | 8025567   | <i>SLC2A14</i>   | -4.035±0.714 | -1.085±1.361 | 1.68E-22 |
| cg24407065 | 1  | 169335802 | <i>NME7</i>      | 1.606±0.492  | 2.673±0.275  | 1.70E-22 |
| cg23432345 | 7  | 27196153  | <i>HOXA7</i>     | -3.525±0.396 | -0.483±1.362 | 1.93E-22 |
| cg03874199 | 2  | 176964456 | <i>HOXD12</i>    | -3.697±0.531 | -1.152±1.173 | 1.95E-22 |
| cg15387123 | 9  | 139891058 | <i>CLIC3</i>     | -0.689±0.318 | -2.16±0.68   | 2.19E-22 |
| cg07195577 | 17 | 27052828  | <i>TLCD1</i>     | -1.976±0.645 | -3.72±0.755  | 2.22E-22 |
| cg23033845 | 17 | 7758662   | <i>TMEM88</i>    | 1.36±0.335   | 2.334±0.435  | 2.31E-22 |
| cg05023540 | 14 | 96116970  | <i>TCL6</i>      | 1.381±0.172  | 0.621±0.354  | 2.95E-22 |
| cg22545356 | 10 | 88716659  | <i>MMRN2</i>     | 0.627±0.282  | 1.546±0.422  | 2.98E-22 |
| cg01242619 | 8  | 145049472 | <i>PLEC</i>      | -1.775±0.35  | -2.903±0.519 | 3.01E-22 |
| cg21591742 | 2  | 176980998 | <i>HOXD10</i>    | -2.247±0.383 | -0.54±0.799  | 3.79E-22 |
| cg04726200 | 11 | 2930485   | <i>SLC22A18</i>  | 0.461±0.277  | 1.388±0.43   | 3.95E-22 |
| cg05221167 | 19 | 9609397   | <i>ZNF560</i>    | -3.211±0.554 | -1.176±0.953 | 4.17E-22 |
| cg01580681 | 4  | 174450016 | <i>HAND2</i>     | -2.088±0.35  | -0.292±0.838 | 4.31E-22 |
| cg06910100 | 19 | 17375091  | <i>USHBP1</i>    | 1.266±0.366  | 2.324±0.48   | 4.93E-22 |
| cg05859264 | 6  | 36097692  | <i>MAPK13</i>    | 0.19±0.319   | -1.101±0.61  | 6.45E-22 |
| cg21747271 | 11 | 67250052  | <i>AIP</i>       | -0.301±0.398 | -1.966±0.788 | 6.59E-22 |
| cg07084163 | 5  | 36066783  | <i>UGT3A2</i>    | -2.117±0.301 | -0.718±0.661 | 7.01E-22 |
| cg14056644 | 4  | 111559105 | <i>PITX2</i>     | -1.621±0.334 | -0.053±0.741 | 7.02E-22 |
| cg23671708 | 17 | 7758291   | <i>TMEM88</i>    | 0.717±0.367  | 1.933±0.571  | 7.08E-22 |
| cg05050341 | 9  | 130617534 | <i>ENG</i>       | 0.239±0.341  | 1.066±0.343  | 7.47E-22 |
| cg04534765 | 18 | 74962369  | <i>GALR1</i>     | -2.936±1.056 | -0.287±1.139 | 1.02E-21 |
| cg27214774 | 20 | 49253710  | <i>FAM65C</i>    | 0.561±0.388  | 1.751±0.557  | 1.16E-21 |
| cg19576304 | 18 | 56940022  | <i>RAX</i>       | -2.967±0.325 | -1.062±0.899 | 1.23E-21 |
| cg22730004 | 1  | 158656718 | <i>SPTA1</i>     | -0.156±0.389 | -1.65±0.718  | 1.52E-21 |
| cg27120999 | 14 | 65008050  | <i>HSPA2</i>     | -0.734±0.449 | 0.887±0.777  | 1.52E-21 |
| cg19466563 | 4  | 88450506  | <i>SPARCL1</i>   | -0.981±0.41  | 0.482±0.705  | 2.01E-21 |
| cg25691167 | 7  | 19184961  | <i>FERD3L</i>    | -3.496±0.717 | -0.928±1.242 | 2.62E-21 |
| cg04947157 | 17 | 76128481  | <i>TMC6</i>      | 0.35±0.426   | -1.415±0.857 | 2.76E-21 |
| cg18952647 | 15 | 83953744  | <i>BNC1</i>      | -3.77±0.707  | -0.829±1.43  | 2.91E-21 |
| cg14859460 | 5  | 178422244 | <i>GRM6</i>      | -2.893±0.734 | -0.468±1.169 | 2.97E-21 |
| cg00534274 | 4  | 139163341 | <i>SLC7A11</i>   | -0.954±0.314 | -2.079±0.546 | 3.02E-21 |
| cg12374721 | 17 | 46799640  | <i>PRAC</i>      | -2.853±0.488 | -0.02±1.363  | 3.33E-21 |
| cg00446235 | 1  | 161008644 | <i>TSTD1</i>     | -1.166±0.469 | -2.886±0.838 | 3.49E-21 |
| cg04057858 | 8  | 10383763  | <i>PRSS55</i>    | 1.267±0.338  | 0.011±0.613  | 3.68E-21 |
| cg00187686 | 11 | 59634218  | <i>TCN1</i>      | 0.649±0.371  | -0.648±0.632 | 3.74E-21 |
| cg21296230 | 15 | 33010536  | <i>GREM1</i>     | -2.797±0.459 | -0.886±0.935 | 3.97E-21 |
| cg18043280 | 17 | 40996886  | <i>AOC2</i>      | 2.156±0.376  | 3.315±0.56   | 5.05E-21 |
| cg03336167 | 11 | 2930995   | <i>SLC22A18</i>  | -0.395±0.396 | 1.341±0.855  | 5.93E-21 |
| cg07651914 | 7  | 100881986 | <i>CLDN15</i>    | 0.846±0.25   | 1.572±0.349  | 6.88E-21 |
| cg01009664 | 3  | 129693613 | <i>TRH</i>       | -3.146±0.464 | -0.341±1.371 | 8.63E-21 |
| cg06615154 | 1  | 153522553 | <i>S100A3</i>    | 0.732±0.271  | 1.805±0.534  | 9.82E-21 |
| cg14456683 | 3  | 147127010 | <i>ZIC1</i>      | -1.419±0.331 | -0.092±0.662 | 1.20E-20 |
| cg02008154 | 7  | 35293537  | <i>TBX20</i>     | -3.104±0.466 | -0.734±1.177 | 1.26E-20 |
| cg00662556 | 18 | 74963364  | <i>GALR1</i>     | -1.834±0.449 | -0.422±0.697 | 1.33E-20 |
| cg07014174 | 21 | 32253760  | <i>KRTAP11-1</i> | 1.602±0.381  | -0.098±0.851 | 1.46E-20 |
| cg25047280 | 7  | 27205479  | <i>HOXA9</i>     | -2.255±0.28  | -0.463±0.885 | 1.68E-20 |
| cg26575445 | 3  | 169756530 | <i>GPR160</i>    | -3.611±0.592 | -4.967±0.587 | 1.77E-20 |
| cg04956511 | 12 | 7056008   | <i>PTPN6</i>     | 0.246±0.295  | -1.132±0.694 | 2.29E-20 |
| cg08647446 | 4  | 74486298  | <i>RASSF6</i>    | -1.998±0.318 | -3.022±0.514 | 2.71E-20 |
| cg11935147 | 1  | 145075831 | <i>PDE4DIP</i>   | -1.902±0.322 | -0.352±0.784 | 3.11E-20 |
| cg12953249 | 9  | 126118772 | <i>CRB2</i>      | 2.322±0.441  | 3.281±0.398  | 3.15E-20 |
| cg06675478 | 13 | 112721786 | <i>SOX1</i>      | -1.202±0.55  | 0.006±0.51   | 3.41E-20 |
| cg09786257 | 5  | 95768695  | <i>PCSK1</i>     | -1.154±0.241 | -0.051±0.56  | 3.43E-20 |
| cg24898753 | 11 | 61735917  | <i>FTH1</i>      | -0.853±0.397 | -2.496±0.838 | 3.82E-20 |
| cg15520279 | 2  | 176995088 | <i>HOXD8</i>     | -2.758±0.967 | -0.433±1.078 | 4.34E-20 |
| cg12880658 | 5  | 115152386 | <i>CDO1</i>      | -4.611±0.572 | -1.554±1.558 | 5.47E-20 |

|            |    |           |                  |              |              |          |
|------------|----|-----------|------------------|--------------|--------------|----------|
| cg02757432 | 10 | 125426048 | <i>GPR26</i>     | -1.239±0.519 | 0.164±0.691  | 5.80E-20 |
| cg26128092 | 1  | 3567550   | <i>WRAP73</i>    | -2.798±0.517 | -0.76±1.048  | 5.89E-20 |
| cg25388528 | 21 | 31987978  | <i>KRTAP20-1</i> | 1.179±0.361  | -0.256±0.738 | 5.89E-20 |
| cg15633390 | 4  | 99851211  | <i>EIF4E</i>     | -1.06±0.594  | -2.501±0.678 | 6.02E-20 |
| cg08832227 | 12 | 5020693   | <i>KCNA1</i>     | -1.408±0.538 | 0.306±0.874  | 6.65E-20 |
| cg07536847 | 1  | 18957232  | <i>PAX7</i>      | -3.168±0.461 | -0.928±1.152 | 6.90E-20 |
| cg19220586 | 1  | 167522470 | <i>CREG1</i>     | -3.717±0.39  | -4.696±0.471 | 7.03E-20 |
| cg11204562 | 10 | 115511153 | <i>PLEKHS1</i>   | 2.389±0.49   | 0.852±0.785  | 7.14E-20 |
| cg27158867 | 11 | 537638    | <i>LRRC56</i>    | -2.68±0.384  | -3.704±0.505 | 7.33E-20 |
| cg22471346 | 17 | 10101473  | <i>GAS7</i>      | -4.395±0.885 | -1.267±1.615 | 8.03E-20 |
| cg21226224 | 8  | 55370171  | <i>SOX17</i>     | -1.784±0.402 | 0.283±1.064  | 8.09E-20 |
| cg08089301 | 17 | 46655561  | <i>HOXB4</i>     | -3.526±0.672 | -0.206±1.714 | 8.67E-20 |
| cg18888403 | 1  | 24152774  | <i>HMGCL</i>     | 2.76±0.388   | 1.252±0.782  | 8.83E-20 |
| cg10217445 | 21 | 34397784  | <i>OLIG2</i>     | -2.833±0.392 | -1.069±0.914 | 8.96E-20 |
| cg06409153 | 17 | 67323953  | <i>ABCA5</i>     | -1.694±0.239 | -2.606±0.474 | 9.22E-20 |
| cg03909500 | 5  | 33936597  | <i>RXFP3</i>     | -3.564±0.446 | -1.765±0.935 | 9.51E-20 |
| cg00548268 | 7  | 98245830  | <i>NPTX2</i>     | -0.783±0.394 | 0.743±0.793  | 9.82E-20 |
| cg06051311 | 6  | 30131001  | <i>TRIM15</i>    | 0.709±0.497  | -1.134±0.959 | 1.02E-19 |
| cg04048259 | 20 | 57875346  | <i>EDN3</i>      | -3.154±0.795 | -0.874±1.156 | 1.04E-19 |
| cg15842276 | 11 | 92702648  | <i>MTNR1B</i>    | -0.516±0.351 | 0.653±0.605  | 1.04E-19 |
| cg11540692 | 6  | 100912072 | <i>SIM1</i>      | -1.66±0.241  | -0.572±0.566 | 1.05E-19 |
| cg23582919 | 16 | 23568380  | <i>EARSD</i>     | -3.419±0.304 | -4.187±0.374 | 1.06E-19 |
| cg17518825 | 2  | 46523461  | <i>EPAS1</i>     | -0.454±0.349 | 0.464±0.455  | 1.08E-19 |
| cg03755123 | 10 | 135043508 | <i>UTF1</i>      | -2.445±0.454 | -0.622±0.951 | 1.09E-19 |
| cg10300684 | 14 | 29236323  | <i>FOXP1</i>     | -2.712±0.49  | -0.613±1.095 | 1.11E-19 |
| cg01770232 | 7  | 22766155  | <i>IL6</i>       | -1.143±0.436 | -2.476±0.685 | 1.13E-19 |
| cg15089387 | 5  | 110406661 | <i>TSLP</i>      | -1.184±0.382 | -2.53±0.701  | 1.19E-19 |
| cg15127733 | 20 | 3713584   | <i>HSPA12B</i>   | -0.725±0.302 | 0.437±0.607  | 1.19E-19 |
| cg03013422 | 12 | 125550350 | <i>AACS</i>      | -3.451±0.383 | -4.409±0.468 | 1.35E-19 |
| cg23213217 | 1  | 224370155 | <i>DEGS1</i>     | 0.253±0.38   | -1.303±0.816 | 1.38E-19 |
| cg22858288 | 11 | 2930322   | <i>SLC22A18</i>  | 0.548±0.328  | 1.607±0.55   | 1.38E-19 |
| cg14265075 | 1  | 157016521 | <i>ARHGEF11</i>  | -1.61±0.359  | -2.862±0.655 | 1.44E-19 |
| cg06445611 | 6  | 90025053  | <i>GABRR2</i>    | 2.33±0.218   | 2.92±0.297   | 1.45E-19 |
| cg21907579 | 12 | 114845868 | <i>TBX5-AS1</i>  | -3.368±0.591 | -1.13±1.175  | 1.54E-19 |
| cg19979773 | 1  | 27702651  | <i>FCN3</i>      | 1.797±0.374  | 2.615±0.365  | 1.54E-19 |
| cg24199834 | 4  | 147560126 | <i>POU4F2</i>    | -2.748±0.432 | -0.602±1.124 | 1.63E-19 |
| cg18883209 | 22 | 44394601  | <i>PARVB</i>     | 0.727±0.359  | 1.549±0.385  | 1.69E-19 |
| cg21243096 | 1  | 38511557  | <i>POU3F1</i>    | -2.797±0.748 | -0.805±1.004 | 1.71E-19 |
| cg02601403 | 17 | 34592053  | <i>TBC1D3C</i>   | 1.818±0.348  | 0.781±0.536  | 1.77E-19 |
| cg00066816 | 5  | 158758353 | <i>LOC285626</i> | -1.294±0.231 | -2.102±0.425 | 1.85E-19 |
| cg26388152 | 17 | 27944453  | <i>CORO6</i>     | -1.923±0.64  | -3.882±1.018 | 1.85E-19 |
| cg09936561 | 4  | 9783623   | <i>DRD5</i>      | -2.056±0.515 | -0.561±0.772 | 2.07E-19 |
| cg06760035 | 17 | 46655245  | <i>HOXB4</i>     | -4.239±0.749 | -0.659±1.887 | 2.08E-19 |
| cg10207745 | 12 | 13529963  | <i>C12orf36</i>  | 0.593±0.342  | -0.621±0.641 | 2.29E-19 |
| cg08749917 | 3  | 186915320 | <i>RTP1</i>      | -0.253±0.282 | 0.777±0.545  | 2.33E-19 |
| cg26252167 | 6  | 110300573 | <i>GPR6</i>      | -2.81±0.694  | -0.963±0.938 | 2.43E-19 |
| cg12758687 | 11 | 113346327 | <i>DRD2</i>      | -1.983±0.304 | -0.677±0.692 | 2.46E-19 |
| cg16812893 | 21 | 31813075  | <i>KRTAP15-1</i> | 1.416±0.303  | 0.058±0.72   | 2.46E-19 |
| cg12611860 | 11 | 17191617  | <i>PIK3C2A</i>   | 0.73±0.326   | 1.508±0.378  | 2.51E-19 |
| cg02164046 | 3  | 187388148 | <i>SST</i>       | -2.891±0.522 | -0.582±1.224 | 2.52E-19 |
| cg12354377 | 10 | 62149557  | <i>ANK3</i>      | 1.364±0.3    | 2.251±0.463  | 2.62E-19 |
| cg20967028 | 12 | 14996272  | <i>ART4</i>      | 1.676±0.283  | 2.393±0.359  | 2.63E-19 |
| cg10368842 | 10 | 115511504 | <i>PLEKHS1</i>   | 0.964±0.472  | -0.482±0.758 | 2.73E-19 |
| cg22346765 | 6  | 41007522  | <i>UNC5CL</i>    | 1.604±0.285  | 0.029±0.831  | 2.76E-19 |
| cg26767897 | 2  | 31637348  | <i>XDH</i>       | 2.893±0.271  | 1.04±0.969   | 2.77E-19 |
| cg21902327 | 12 | 4554786   | <i>FGF6</i>      | 1.414±0.252  | 0.438±0.519  | 2.80E-19 |
| cg04317399 | 7  | 27170313  | <i>HOXA4</i>     | -0.924±0.51  | 0.469±0.717  | 2.94E-19 |
| cg17217654 | 3  | 49058043  | <i>NDUFAF3</i>   | -3.555±0.266 | -4.4±0.446   | 2.95E-19 |
| cg06005396 | 19 | 590541    | <i>HCN2</i>      | -3.734±0.494 | -1.834±1.013 | 2.95E-19 |
| cg19797376 | 1  | 47695475  | <i>TAL1</i>      | -2.293±0.301 | -0.631±0.879 | 2.95E-19 |
| cg18536148 | 17 | 59533844  | <i>TBX4</i>      | -1.354±0.492 | 0.347±0.903  | 2.95E-19 |
| cg25483003 | 9  | 139948856 | <i>ENTPD2</i>    | -1.21±0.346  | -2.403±0.633 | 2.95E-19 |
| cg15105987 | 3  | 181430317 | <i>SOX2</i>      | -1.197±0.231 | -0.382±0.433 | 3.00E-19 |
| cg11208483 | 13 | 95364233  | <i>SOX21</i>     | -1.33±0.227  | -0.591±0.392 | 3.11E-19 |
| cg24169822 | 7  | 27170994  | <i>HOXA4</i>     | -1.144±0.444 | 0.178±0.694  | 3.12E-19 |
| cg06092815 | 2  | 229046406 | <i>SPHKAP</i>    | -1.477±0.384 | -0.189±0.684 | 3.16E-19 |
| cg16313343 | 14 | 105768109 | <i>BRF1</i>      | -1.598±0.394 | -2.852±0.664 | 3.28E-19 |

|            |    |           |           |              |              |          |
|------------|----|-----------|-----------|--------------|--------------|----------|
| cg17063929 | 11 | 89224799  | NOX4      | -2.089±0.325 | -0.506±0.843 | 3.40E-19 |
| cg15699524 | 5  | 170845610 | FGF18     | 0.657±0.321  | -0.18±0.427  | 3.53E-19 |
| cg08251399 | 2  | 31457608  | EHD3      | -0.183±0.218 | 0.655±0.449  | 3.72E-19 |
| cg26514942 | 2  | 103378506 | TMEM182   | 1.043±0.288  | 1.879±0.439  | 3.95E-19 |
| cg26530341 | 8  | 23083353  | LOC389641 | 1.622±0.398  | 0.099±0.816  | 3.95E-19 |
| cg20831708 | 10 | 102279373 | SEC31B    | -0.31±0.455  | 1.038±0.71   | 3.96E-19 |
| cg15856055 | 10 | 135121295 | ZNF511    | -0.594±0.369 | -1.797±0.64  | 3.96E-19 |
| cg10636246 | 1  | 159046973 | AIM2      | -0.403±0.451 | -2.313±1.024 | 3.96E-19 |
| cg20291049 | 2  | 105472217 | POU3F3    | -1.837±0.479 | -0.018±0.976 | 3.96E-19 |
| cg03811478 | 3  | 137483696 | SOX14     | -1.669±0.348 | -0.604±0.564 | 4.06E-19 |
| cg15998761 | 2  | 191300784 | MFSD6     | 0.994±0.338  | 1.822±0.414  | 4.06E-19 |
| cg11998307 | 17 | 1549434   | SCARF1    | 1.291±0.281  | 2.148±0.455  | 4.28E-19 |
| cg00411097 | 7  | 1596050   | TMEM184A  | -0.015±0.229 | -0.968±0.513 | 4.50E-19 |
| cg24670715 | 8  | 6420506   | ANGPT2    | -0.15±0.305  | 0.889±0.557  | 4.74E-19 |
| cg01295203 | 8  | 70984199  | PRDM14    | -2.681±0.375 | -0.363±1.234 | 4.84E-19 |
| cg15164103 | 7  | 130126871 | MEST      | -0.944±0.244 | -1.877±0.503 | 5.15E-19 |
| cg20366906 | 13 | 53422381  | PCDH8     | -1.756±0.388 | -0.299±0.786 | 5.22E-19 |
| cg22449114 | 20 | 590243    | TCF15     | -1.791±0.347 | -0.507±0.694 | 5.55E-19 |
| cg00767581 | 2  | 177015125 | MIR10B    | -1.634±0.42  | 0.094±0.934  | 5.68E-19 |
| cg12127282 | 2  | 177014685 | MIR10B    | -1.596±0.426 | 0.118±0.927  | 5.79E-19 |
| cg24949488 | 10 | 98064362  | DNTT      | 1.662±0.389  | 0.173±0.807  | 6.20E-19 |
| cg27541541 | 6  | 22298146  | PRL       | 0.056±0.292  | 0.813±0.391  | 6.41E-19 |
| cg04490714 | 16 | 55690564  | SLC6A2    | -3.187±0.813 | -0.891±1.214 | 6.71E-19 |
| cg10660256 | 5  | 78407683  | BHMT      | -2.324±0.464 | -0.4±1.044   | 6.92E-19 |
| cg14448116 | 1  | 161170110 | NDUFS2    | 0.949±0.25   | 1.869±0.499  | 6.93E-19 |
| cg10238818 | 21 | 27945554  | CYYR1     | -3.224±0.753 | -1.071±1.145 | 7.56E-19 |
| cg11260848 | 11 | 44326260  | ALX4      | -2.018±0.238 | -0.579±0.775 | 7.70E-19 |
| cg10549973 | 14 | 58863097  | TOMM20L   | -1.412±0.451 | -2.943±0.83  | 7.79E-19 |
| cg22740835 | 1  | 162602559 | DDR2      | 0.23±0.369   | 1.517±0.699  | 7.79E-19 |
| cg04901273 | 17 | 34503359  | TBC1D3B   | 1.119±0.215  | 0.439±0.367  | 8.16E-19 |
| cg02337447 | 17 | 10602032  | ADPRM     | 0.395±0.42   | -0.643±0.526 | 9.64E-19 |
| cg26133068 | 22 | 24199008  | SLC2A11   | -1.191±0.315 | -2.188±0.54  | 1.01E-18 |
| cg00911351 | 5  | 140767255 | PCDHGB4   | -2.404±0.378 | -1.082±0.722 | 1.02E-18 |
| cg25750259 | 20 | 43104962  | TTPAL     | -3.34±0.467  | -4.456±0.566 | 1.03E-18 |
| cg04983977 | 1  | 200842145 | GPR25     | 0.613±0.184  | 1.261±0.354  | 1.13E-18 |
| cg10031456 | 2  | 33661691  | RASGRP3   | 0.425±0.301  | 1.161±0.357  | 1.16E-18 |
| cg01656853 | 19 | 49199172  | FUT2      | -0.358±0.236 | -1.206±0.465 | 1.17E-18 |
| cg10896774 | 7  | 142636840 | C7orf34   | -1.147±0.29  | -2.32±0.644  | 1.21E-18 |
| cg09060914 | 1  | 169599558 | SELP      | 0.207±0.29   | 1.223±0.557  | 1.27E-18 |
| cg06194808 | 7  | 1596217   | TMEM184A  | 1.552±0.411  | -0.346±1.042 | 1.29E-18 |
| cg03567830 | 20 | 61339871  | NTSR1     | -2.552±0.702 | -0.684±0.99  | 1.32E-18 |
| cg08191854 | 21 | 45773294  | TRPM2     | -1.721±0.43  | -3.538±1     | 1.37E-18 |
| cg14121103 | 3  | 43731973  | ABHD5     | -3.235±0.249 | -3.998±0.415 | 1.38E-18 |
| cg02245378 | 2  | 223161771 | CCDC140   | -2.535±0.334 | -0.561±1.078 | 1.45E-18 |
| cg08319404 | 3  | 24537435  | THRB      | -0.05±0.316  | -1.433±0.762 | 1.47E-18 |
| cg17095936 | 1  | 168250628 | TBX19     | 2.59±0.382   | 3.326±0.3    | 1.63E-18 |
| cg09508556 | 6  | 31106982  | PSORS1C2  | 2.048±0.386  | 0.806±0.681  | 1.65E-18 |
| cg06958537 | 21 | 40176950  | ETS2      | -1.434±0.308 | -2.647±0.671 | 1.68E-18 |
| cg26728422 | 16 | 1429015   | UNKL      | -1.642±0.615 | -3.112±0.756 | 1.71E-18 |
| cg13376158 | 17 | 73128023  | NT5C      | -3.932±0.434 | -4.967±0.531 | 1.73E-18 |
| cg02806777 | 19 | 46526317  | PGLYRP1   | -0.941±0.503 | 0.486±0.772  | 1.74E-18 |
| cg22303211 | 13 | 112722171 | SOX1      | -1.164±0.232 | -0.42±0.41   | 1.98E-18 |
| cg12109455 | 10 | 134000737 | DPYSL4    | -2.751±0.693 | -0.98±0.937  | 1.98E-18 |
| cg14822966 | 4  | 1714979   | SLBP      | -3.725±0.34  | -4.538±0.42  | 2.03E-18 |
| cg25391023 | 6  | 32374754  | BTNL2     | 0.985±0.239  | -0.307±0.713 | 2.04E-18 |
| cg03544320 | 4  | 5894691   | CRMP1     | -0.383±0.643 | 0.874±0.54   | 2.19E-18 |
| cg24423088 | 21 | 32185365  | KRTAP8-1  | 4.042±0.386  | 1.713±1.283  | 2.25E-18 |
| cg12865837 | 6  | 100911526 | SIM1      | -2.306±0.313 | -1.19±0.62   | 2.26E-18 |
| cg16254309 | 7  | 145814152 | CNTNAP2   | -2.796±0.451 | -0.545±1.249 | 2.34E-18 |
| cg06722633 | 1  | 37499309  | GRIK3     | -2.676±0.562 | -0.555±1.181 | 2.40E-18 |
| cg24528523 | 11 | 2923808   | SLC22A18  | -2.035±0.201 | -2.441±0.184 | 2.44E-18 |
| cg27549944 | 1  | 204328843 | PLEKHA6   | -2.449±0.315 | -0.606±1.02  | 2.55E-18 |
| cg20798152 | 5  | 71014900  | CARTPT    | -1.123±0.285 | -0.038±0.606 | 2.78E-18 |
| cg25993718 | 20 | 54580196  | CBLN4     | -2.231±0.512 | -0.733±0.824 | 2.86E-18 |
| cg03283569 | 9  | 127963181 | RABEPK    | -2.623±0.283 | -3.274±0.333 | 2.91E-18 |
| cg08744726 | 7  | 149323101 | ZNF767    | -0.405±0.244 | -1.4±0.557   | 2.92E-18 |
| cg04081402 | 22 | 31003587  | TCN2      | 1.145±0.373  | 2.278±0.628  | 3.30E-18 |

|            |    |           |           |              |              |          |
|------------|----|-----------|-----------|--------------|--------------|----------|
| cg02489552 | 19 | 15121531  | CCDC105   | -1.645±0.369 | -0.607±0.569 | 3.34E-18 |
| cg16431978 | 21 | 31797932  | KRTAP13-3 | 1.071±0.252  | -0.017±0.611 | 3.51E-18 |
| cg09643544 | 19 | 9473696   | ZNF177    | -2.078±0.477 | -0.35±0.969  | 3.54E-18 |
| cg20792062 | 12 | 5153288   | KCNA5     | -1.858±0.559 | -0.389±0.796 | 3.60E-18 |
| cg16263182 | 16 | 223399    | HBA2      | -3.44±0.68   | -1.58±1.019  | 4.07E-18 |
| cg16592658 | 19 | 4229887   | EBI3      | 0.674±0.335  | -0.595±0.715 | 4.11E-18 |
| cg00891541 | 16 | 68481487  | SMPD3     | 0.054±0.462  | 1.414±0.754  | 4.18E-18 |
| cg17525406 | 1  | 4715520   | AJAP1     | -3.052±0.736 | -0.163±1.63  | 4.27E-18 |
| cg15701111 | 12 | 52685334  | KRT81     | 0.388±0.519  | 1.481±0.532  | 4.27E-18 |
| cg14948822 | 2  | 27545006  | MPV17     | 1.889±0.365  | 0.841±0.581  | 4.64E-18 |
| cg17347253 | 7  | 130130288 | MESTIT1   | -0.336±0.232 | 0.507±0.476  | 4.68E-18 |
| cg21245652 | 2  | 95691051  | MAL       | -1.555±0.208 | -0.447±0.623 | 4.78E-18 |
| cg17770886 | 10 | 135121331 | ZNF511    | -1.746±0.296 | -2.549±0.441 | 5.17E-18 |
| cg03285457 | 10 | 102988529 | LBX1      | -4.023±0.627 | -1.997±1.142 | 5.57E-18 |
| cg18397523 | 7  | 27282351  | EVX1      | -3.475±0.32  | -1.271±1.234 | 5.59E-18 |
| cg18410627 | 9  | 129677882 | RALGPS1   | -3.438±0.283 | -4.28±0.471  | 5.66E-18 |
| cg18702197 | 2  | 177027641 | HOXD3     | -2.715±0.463 | -0.966±0.993 | 6.07E-18 |
| cg22187630 | 19 | 13616871  | CACNA1A   | -2.903±0.435 | -1.057±1.049 | 6.27E-18 |
| cg19343464 | 11 | 105481509 | GRIA4     | -3.629±0.532 | -1.2±1.381   | 6.77E-18 |
| cg24387380 | 15 | 27159158  | GABRA5    | 0.868±0.325  | -0.38±0.711  | 6.88E-18 |
| cg01683883 | 16 | 66613053  | CMTM2     | -1.925±0.495 | 0.219±1.221  | 7.00E-18 |
| cg24468890 | 1  | 32757294  | HDAC1     | -1.586±0.209 | -2.513±0.529 | 7.49E-18 |
| cg19780563 | 10 | 94594494  | EXOC6     | 1.026±0.3    | 1.903±0.492  | 7.57E-18 |
| cg06151165 | 20 | 25062254  | VSX1      | -4.304±0.918 | -1.594±1.524 | 7.75E-18 |
| cg12447832 | 2  | 3383257   | TRAPPC12  | -0.425±0.372 | -1.486±0.594 | 7.76E-18 |
| cg04396791 | 11 | 70508180  | SHANK2    | -0.968±0.253 | 0.115±0.619  | 7.92E-18 |
| cg04062391 | 19 | 9609204   | ZNF560    | -3.13±0.434  | -1.344±1.021 | 8.01E-18 |
| cg05261299 | 12 | 52437299  | NR4A1     | 1.568±0.349  | 2.654±0.615  | 8.21E-18 |
| cg25226247 | 6  | 50785152  | TFAP2B    | -2.161±0.41  | -0.678±0.848 | 8.46E-18 |
| cg19497444 | 11 | 2930794   | SLC22A18  | 1.019±0.189  | 1.647±0.358  | 8.50E-18 |
| cg05726109 | 22 | 19709755  | GP1BB     | 1.189±0.302  | 2.356±0.668  | 8.54E-18 |
| cg09067967 | 4  | 39529342  | UGDH-AS1  | -3.289±0.487 | -2.129±0.622 | 8.59E-18 |
| cg06958829 | 17 | 48546118  | CHAD      | -0.871±0.4   | 0.771±0.94   | 8.59E-18 |
| cg02189785 | 9  | 139891008 | CLIC3     | -1.442±0.349 | -2.813±0.785 | 8.64E-18 |
| cg21410991 | 5  | 50678451  | ISL1      | -2.659±0.477 | -0.882±1.017 | 8.64E-18 |
| cg02442161 | 20 | 43803637  | PI3       | 1.648±0.372  | 0.035±0.924  | 8.65E-18 |
| cg07059052 | 16 | 2828302   | TCEB2     | -2.518±0.423 | -3.794±0.722 | 8.66E-18 |
| cg10175795 | 10 | 133109194 | TCERG1L   | -2.365±0.367 | -0.904±0.838 | 9.01E-18 |
| cg24019564 | 1  | 25257566  | RUNX3     | -1.561±0.38  | -0.172±0.796 | 9.09E-18 |
| cg24272559 | 1  | 166572716 | FMO9P     | 2.136±0.446  | 0.482±0.95   | 9.97E-18 |
| cg02332525 | 3  | 6903153   | GRM7      | -1.249±0.398 | -0.181±0.595 | 1.02E-17 |
| cg06277657 | 7  | 137532374 | DGKI      | -2.786±0.489 | -0.587±1.262 | 1.02E-17 |
| cg10556064 | 16 | 68481489  | SMPD3     | 0.121±0.394  | 1.396±0.728  | 1.02E-17 |
| cg24762359 | 13 | 25254447  | ATP12A    | -3.213±0.409 | -4.14±0.489  | 1.08E-17 |
| cg20158248 | 16 | 16042956  | ABCC1     | -3.268±0.379 | -4.044±0.381 | 1.08E-17 |
| cg02131853 | 4  | 39034637  | TMEM156   | -0.122±0.34  | -1.198±0.616 | 1.22E-17 |
| cg01335367 | 12 | 110172208 | FAM222A   | -2.272±0.262 | -0.169±1.196 | 1.28E-17 |
| cg20789824 | 9  | 127562861 | OLFML2A   | -0.1±0.321   | 0.789±0.504  | 1.56E-17 |
| cg25902889 | 19 | 4305090   | FSD1      | -0.285±0.383 | 1.068±0.783  | 1.57E-17 |
| cg17496788 | 1  | 162601807 | DDR2      | 0.385±0.319  | 1.332±0.542  | 1.58E-17 |
| cg16280667 | 11 | 118754593 | CXCR5     | 2.622±0.402  | 1.411±0.697  | 1.88E-17 |
| cg25875213 | 19 | 38183055  | ZNF781    | -4.819±0.758 | -1.686±1.826 | 1.98E-17 |
| cg02844545 | 6  | 10882043  | GCM2      | -1.306±0.248 | 0.032±0.776  | 1.99E-17 |
| cg14547335 | 3  | 10491247  | ATP2B2    | 2.74±0.35    | 1.372±0.797  | 1.99E-17 |
| cg24507762 | 20 | 48099890  | KCNB1     | -1.758±0.356 | -0.626±0.656 | 2.02E-17 |
| cg01091565 | 15 | 90294762  | MESP1     | 2.127±0.406  | 0.914±0.699  | 2.11E-17 |
| cg17983307 | 1  | 201181402 | IGFN1     | 1.91±0.275   | 0.881±0.6    | 2.15E-17 |
| cg24110050 | 1  | 67217853  | TCTEX1D1  | -4.079±0.356 | -1.859±1.286 | 2.20E-17 |
| cg07104706 | 13 | 84456127  | SLITRK1   | -3.623±0.501 | -1.171±1.432 | 2.43E-17 |
| cg07525077 | 14 | 21359943  | RNASE3    | 0.654±0.332  | -0.718±0.803 | 2.47E-17 |
| cg07837085 | 1  | 160708990 | SLAMF7    | -0.346±0.438 | -1.777±0.834 | 2.50E-17 |
| cg14458834 | 17 | 46655394  | HOXB4     | -3.608±0.439 | -0.666±1.709 | 2.71E-17 |
| cg27665659 | 7  | 100797595 | AP1S1     | -3.764±0.357 | -4.514±0.387 | 2.76E-17 |
| cg02989940 | 16 | 31539234  | AHSP      | 1.938±0.38   | 0.371±0.921  | 2.85E-17 |
| cg26673195 | 17 | 41052729  | G6PC      | -0.186±0.301 | -1.351±0.684 | 2.88E-17 |
| cg04958389 | 0  | 0         | 0         | 1.374±0.266  | 0.207±0.686  | 3.02E-17 |
| cg25802093 | 10 | 22634038  | SPAG6     | -1.922±0.387 | -0.135±1.053 | 3.41E-17 |

|             |    |           |           |              |              |          |
|-------------|----|-----------|-----------|--------------|--------------|----------|
| cg09944526  | 10 | 94594201  | EXOC6     | 0.349±0.346  | 1.285±0.538  | 3.42E-17 |
| cg19091641  | 16 | 21223674  | ZP2       | 1.514±0.287  | 2.163±0.354  | 3.51E-17 |
| cg09619146  | 10 | 125651034 | CPXM2     | -1.192±0.401 | 0.046±0.724  | 3.64E-17 |
| cg26218269  | 4  | 151503227 | MAB21L2   | 0.876±0.393  | 1.634±0.365  | 3.70E-17 |
| cg16196812  | 10 | 120355139 | PRLHR     | -1.192±0.292 | -0.272±0.539 | 3.74E-17 |
| cg10303487  | 8  | 105479058 | DPYS      | -2.571±0.944 | -0.464±1.142 | 3.78E-17 |
| cg14144305  | 11 | 44325960  | ALX4      | -3.126±0.441 | -1.415±1.012 | 3.94E-17 |
| cg03741352  | 1  | 152573450 | LCE3C     | 1.729±0.227  | 0.644±0.641  | 4.04E-17 |
| cg14008883  | 10 | 50818911  | SLC18A3   | -2.182±0.571 | -0.668±0.869 | 4.06E-17 |
| cg24748945  | 19 | 4123852   | MAP2K2    | -2.065±0.38  | -1.358±0.323 | 4.18E-17 |
| cg26825755  | 16 | 20587568  | ACSM2B    | -1.046±0.243 | -2.111±0.631 | 4.33E-17 |
| cg05373457  | 8  | 99439948  | KCNS2     | -1.771±0.26  | -0.458±0.777 | 4.35E-17 |
| cg15739437  | 5  | 110407538 | TSLP      | -0.477±0.263 | -1.487±0.599 | 4.63E-17 |
| cg06531741  | 11 | 113775450 | HTR3B     | 0.642±0.356  | 1.641±0.582  | 4.64E-17 |
| cg23710218  | 8  | 72756656  | MSC       | -1.87±0.209  | -0.197±0.98  | 4.70E-17 |
| cg24101578  | 20 | 44880263  | CDH22     | -1.545±0.309 | -0.412±0.674 | 5.09E-17 |
| cg18081258  | 14 | 21494161  | NDRG2     | -1.109±0.294 | 0.032±0.679  | 5.10E-17 |
| cg06793062  | 16 | 76343868  | CNTNAP4   | 1.741±0.313  | 0.476±0.754  | 5.58E-17 |
| cg03270167  | 2  | 238768916 | RAMP1     | -2.131±0.433 | -3.434±0.769 | 5.81E-17 |
| cg24240626  | 2  | 79386720  | REG3A     | 0.804±0.294  | -0.449±0.748 | 5.99E-17 |
| cg02724472  | 7  | 102553293 | LRRC17    | -1.152±0.375 | -0.047±0.651 | 6.07E-17 |
| cg05700681  | 16 | 57392764  | CCL22     | 2.443±0.454  | 1.247±0.694  | 6.20E-17 |
| cg17987660  | 8  | 96281909  | C8orf37   | -3.979±0.35  | -2.799±0.703 | 6.28E-17 |
| cg19996355  | 19 | 19729375  | PBX4      | -2.5±0.447   | -3.745±0.729 | 6.44E-17 |
| cg25659818  | 17 | 34431747  | CCL4      | 1.61±0.282   | 0.291±0.789  | 6.60E-17 |
| cg16404106  | 11 | 86085623  | CCDC81    | -1.607±0.353 | -0.346±0.754 | 6.71E-17 |
| cg09924998  | 12 | 122751933 | VPS33A    | -0.243±0.318 | -1.219±0.579 | 7.01E-17 |
| cg01148741  | 2  | 96811453  | DUSP2     | -0.757±0.372 | -1.812±0.621 | 7.26E-17 |
| cg19988449  | 15 | 83952808  | BNC1      | -2.736±0.328 | -0.858±1.121 | 7.30E-17 |
| cg04228042  | 12 | 14996527  | ART4      | 0.587±0.356  | 1.753±0.696  | 7.32E-17 |
| cg13699808  | 20 | 45985339  | ZMYND8    | -0.978±0.393 | -2.298±0.789 | 7.40E-17 |
| cg13301014  | 19 | 38754768  | SPINT2    | -2.458±0.398 | -3.507±0.611 | 7.69E-17 |
| cg17357062  | 9  | 137810348 | FCN1      | 1.576±0.254  | 0.412±0.699  | 7.79E-17 |
| cg26609631  | 13 | 28366814  | GSX1      | -2.08±0.795  | -0.221±1.049 | 7.80E-17 |
| cg24215443  | 6  | 134210598 | TCF21     | -1.421±0.312 | -0.455±0.576 | 8.12E-17 |
| cg21614638  | 4  | 100737821 | DAPP1     | 0.022±0.49   | -1.55±0.941  | 8.76E-17 |
| cg26186727  | 18 | 70534534  | NETO1     | -2.239±0.596 | -0.568±0.988 | 9.08E-17 |
| cg00201234  | 3  | 13590968  | FBLN2     | -2.158±0.37  | -0.752±0.848 | 9.49E-17 |
| cg16521028  | 12 | 75874414  | GLIPR1    | -1.057±0.454 | -2.478±0.852 | 1.03E-16 |
| cg17399166  | 1  | 158149795 | CD1D      | 2.023±0.363  | 0.666±0.82   | 1.04E-16 |
| cg211130374 | 21 | 42734266  | MX2       | -0.104±0.462 | -1.989±1.139 | 1.04E-16 |
| cg12699371  | 18 | 74961424  | GALR1     | -3.416±0.449 | -1.682±1.048 | 1.04E-16 |
| cg20892287  | 11 | 128893851 | ARHGAP32  | 1.214±0.295  | 0.392±0.487  | 1.05E-16 |
| cg11455040  | 1  | 205649941 | SLC45A3   | -3.609±0.325 | -4.461±0.5   | 1.06E-16 |
| cg24921858  | 12 | 12223989  | BCL2L14   | -0.45±0.304  | -1.552±0.667 | 1.09E-16 |
| cg16142218  | 8  | 23101221  | CHMP7     | -0.12±0.408  | -1.233±0.659 | 1.16E-16 |
| cg19718882  | 11 | 32458714  | WT1-AS    | -2.934±0.498 | -1.134±1.09  | 1.18E-16 |
| cg06436504  | 3  | 99833735  | CMSS1     | 0.917±0.384  | 1.965±0.623  | 1.40E-16 |
| cg13354523  | 12 | 10251574  | CLEC1A    | 0.058±0.308  | 1.204±0.697  | 1.45E-16 |
| cg26738880  | 7  | 154429032 | DPP6      | 1.465±0.283  | 0.027±0.874  | 1.45E-16 |
| cg15852891  | 5  | 76934946  | OTP       | -4.485±0.565 | -2.397±1.27  | 1.45E-16 |
| cg17051321  | 15 | 83952508  | BNC1      | -2.558±0.349 | -1.212±0.821 | 1.52E-16 |
| cg08572611  | 7  | 100253914 | ACTL6B    | -3.014±0.848 | -0.72±1.365  | 1.52E-16 |
| cg10486998  | 18 | 74961787  | GALR1     | -3.158±0.54  | -1.261±1.156 | 1.60E-16 |
| cg17619823  | 8  | 37823475  | ADRB3     | -4.02±0.904  | -1.407±1.571 | 1.60E-16 |
| cg27063986  | 4  | 116035232 | NDST4     | 0.154±0.349  | 1.318±0.708  | 1.65E-16 |
| cg21241823  | 21 | 43300024  | PRDM15    | -1.124±0.314 | -1.974±0.507 | 1.73E-16 |
| cg25813714  | 19 | 15782945  | CYP4F12   | 3.267±0.208  | 2.433±0.51   | 1.78E-16 |
| cg06993413  | 15 | 65810204  | DPP8      | -3.518±0.259 | -4.354±0.509 | 1.79E-16 |
| cg02367951  | 6  | 27806562  | HIST1H2BN | -1.161±0.241 | -0.578±0.34  | 1.80E-16 |
| cg11323198  | 16 | 62069806  | CDH8      | -2.463±0.625 | -0.713±1.052 | 1.84E-16 |
| cg14646244  | 7  | 107300287 | SLC26A4   | -0.926±0.365 | -2.222±0.792 | 1.86E-16 |
| cg12614105  | 7  | 24324435  | NPY       | -2.835±0.348 | -1.138±1.038 | 1.86E-16 |
| cg25072962  | 11 | 60524575  | MS4A15    | 1.1±0.276    | -0.183±0.786 | 1.88E-16 |
| cg15674997  | 5  | 178421314 | GRM6      | -0.725±0.323 | 0.046±0.448  | 1.91E-16 |
| cg27041096  | 8  | 120079173 | COLEC10   | 0.382±0.342  | 1.268±0.527  | 1.96E-16 |
| cg10647513  | 16 | 227203    | HBA1      | -3.11±0.737  | -1.246±1.103 | 2.03E-16 |

|            |    |           |            |              |              |          |
|------------|----|-----------|------------|--------------|--------------|----------|
| cg08369065 | 8  | 11562683  | GATA4      | -3.327±0.459 | -1.418±1.174 | 2.22E-16 |
| cg18521771 | 9  | 117373239 | C9orf91    | 1.638±0.199  | 1.126±0.305  | 2.25E-16 |
| cg05828624 | 2  | 79347699  | REG1A      | 2.49±0.227   | 1.026±0.895  | 2.28E-16 |
| cg11206634 | 2  | 128458399 | SFT2D3     | 1.023±0.288  | -0.404±0.878 | 2.38E-16 |
| cg25266232 | 18 | 49867126  | DCC        | -2.939±0.392 | -1.541±0.86  | 2.41E-16 |
| cg02510853 | 16 | 3031707   | PKMYT1     | -0.505±0.264 | 0.567±0.661  | 2.43E-16 |
| cg05073035 | 3  | 147127193 | ZIC1       | -1.959±0.295 | -0.764±0.737 | 2.54E-16 |
| cg17998964 | 11 | 63655903  | MARK2      | -1.538±0.386 | -2.715±0.721 | 2.86E-16 |
| cg21815667 | 2  | 176993841 | HOXD8      | -3.294±0.333 | -1.49±1.113  | 2.88E-16 |
| cg23640701 | 12 | 52301634  | ACVRL1     | 0.614±0.391  | 1.723±0.674  | 2.88E-16 |
| cg23147597 | 19 | 45174681  | CEACAM19   | 2.286±0.366  | 0.867±0.878  | 2.99E-16 |
| cg14384532 | 15 | 88800624  | NTRK3      | -3.341±0.466 | -1.182±1.336 | 2.99E-16 |
| cg22472290 | 19 | 52391480  | ZNF577     | -1.175±0.404 | 0.117±0.795  | 3.03E-16 |
| cg19358493 | 10 | 119300942 | EMX2       | -3.49±0.419  | -1.488±1.239 | 3.13E-16 |
| cg07376535 | 18 | 905450    | ADCYAP1    | -3.144±0.421 | -1.514±1.01  | 3.15E-16 |
| cg13676215 | 7  | 17337976  | AHR        | -0.411±0.263 | -1.443±0.64  | 3.16E-16 |
| cg12876594 | 9  | 35791798  | NPR2       | -0.073±0.357 | 0.962±0.633  | 3.24E-16 |
| cg04784672 | 14 | 42077674  | LRFN5      | -3.197±0.612 | -1.083±1.309 | 3.42E-16 |
| cg24335895 | 19 | 36643771  | COX7A1     | -1.008±0.352 | 0.223±0.763  | 3.44E-16 |
| cg02351381 | 12 | 110172346 | FAM222A    | -1.519±0.321 | -0.041±0.917 | 3.45E-16 |
| cg25596297 | 2  | 223162875 | CCDC140    | -3.414±0.35  | -1.211±1.361 | 3.45E-16 |
| cg00792849 | 15 | 35046610  | GJD2       | -3.391±0.575 | -1.575±1.121 | 3.59E-16 |
| cg17141902 | 9  | 95897216  | NINJ1      | 0.306±0.234  | -0.33±0.387  | 3.59E-16 |
| cg20073553 | 4  | 13545291  | NKX3-2     | -2.72±0.312  | -1.125±0.991 | 3.74E-16 |
| cg04272086 | 18 | 49867359  | DCC        | -3.298±0.567 | -1.736±0.954 | 4.00E-16 |
| cg20559736 | 19 | 45174671  | CEACAM19   | 1.537±0.198  | 1.028±0.307  | 4.01E-16 |
| cg18087477 | 1  | 115397597 | SYCP1      | -0.191±0.324 | 0.732±0.566  | 4.05E-16 |
| cg03775422 | 7  | 54610192  | VSTM2A     | -3.699±0.503 | -1.743±1.22  | 4.17E-16 |
| cg02423618 | 15 | 97325725  | SPATA8-AS1 | 0.681±0.183  | -0.154±0.521 | 4.20E-16 |
| cg01036779 | 19 | 6768251   | SH2D3A     | -1.712±0.331 | -2.564±0.515 | 4.37E-16 |
| cg16787600 | 10 | 106400880 | SORCS3     | -2.909±0.45  | -0.724±1.363 | 4.37E-16 |
| cg25484904 | 4  | 48988015  | CWH43      | -1.56±0.427  | -0.144±0.882 | 4.51E-16 |
| cg19824441 | 12 | 57388312  | GPR182     | 0.584±0.214  | 1.28±0.433   | 4.64E-16 |
| cg11525285 | 14 | 74706336  | VSX2       | -2.92±0.33   | -0.895±1.26  | 4.65E-16 |
| cg27071517 | 21 | 31768726  | KRTAP13-1  | 1.779±0.141  | 0.943±0.522  | 4.72E-16 |
| cg23067535 | 8  | 124195133 | FAM83A     | 1.802±0.433  | 0.224±0.987  | 4.75E-16 |
| cg22752533 | 20 | 44657948  | SLC12A5    | -0.661±0.416 | 0.296±0.564  | 4.92E-16 |
| cg14444710 | 16 | 2587080   | PDPK1      | 1.586±0.269  | 0.447±0.715  | 5.43E-16 |
| cg09059945 | 7  | 130126018 | MEST       | -1.195±0.331 | -2.377±0.743 | 5.98E-16 |
| cg26147480 | 10 | 126490099 | FAM175B    | 2.433±0.282  | 1.05±0.869   | 6.01E-16 |
| cg18267381 | 3  | 21792434  | ZNF385D    | -1.944±0.361 | -0.515±0.899 | 6.03E-16 |
| cg27420123 | 11 | 30251473  | FSHB       | 0.534±0.237  | -0.525±0.666 | 6.06E-16 |
| cg13398291 | 8  | 41166169  | SFRP1      | -3.201±0.686 | -0.999±1.378 | 6.07E-16 |
| cg00015770 | 4  | 122302007 | QRFRP      | -2.222±0.355 | -0.579±1.036 | 6.58E-16 |
| cg00918005 | 2  | 79253210  | REG3G      | 1.968±0.235  | 0.662±0.822  | 6.80E-16 |
| cg24194775 | 9  | 35791475  | NPR2       | -0.29±0.547  | 1.28±0.977   | 6.88E-16 |
| cg00708598 | 13 | 53313895  | LECT1      | -2.082±0.301 | -0.97±0.702  | 7.03E-16 |
| cg27011193 | 2  | 91848204  | LOC654342  | -1.256±0.29  | -0.578±0.406 | 7.17E-16 |
| cg09873258 | 14 | 101192894 | DLK1       | -0.908±0.418 | 0.694±1.012  | 7.30E-16 |
| cg19306866 | 21 | 31970997  | 0          | 2.573±0.289  | 1.33±0.786   | 7.32E-16 |
| cg25882366 | 17 | 46622037  | HOXB-AS1   | -0.966±0.27  | 0.003±0.612  | 7.33E-16 |
| cg15227982 | 10 | 104535854 | WBP1L      | -1.823±0.44  | -0.329±0.942 | 7.44E-16 |
| cg20442697 | 7  | 102553432 | LRRC17     | -0.723±0.368 | 0.597±0.835  | 7.97E-16 |
| cg19815376 | 6  | 114225306 | FLJ34503   | -0.996±0.376 | -0.023±0.598 | 8.05E-16 |
| cg17389519 | 10 | 23480730  | PTF1A      | -1.944±0.304 | -0.801±0.724 | 8.07E-16 |
| cg12457773 | 6  | 24126497  | NRSN1      | -2.093±0.427 | -0.776±0.827 | 8.09E-16 |
| cg26963271 | 1  | 66259081  | PDE4B      | -3.611±0.761 | -1.577±1.258 | 8.10E-16 |
| cg03289872 | 19 | 56989102  | ZNF667-AS1 | -3.715±0.641 | -1.663±1.293 | 8.40E-16 |
| cg02994974 | 11 | 13984544  | SPON1      | -3.013±0.664 | -1.231±1.104 | 8.44E-16 |
| cg07703401 | 16 | 230341    | HBQ1       | -3.376±0.711 | -0.942±1.54  | 8.63E-16 |
| cg26705561 | 10 | 102279791 | SEC31B     | 0.649±0.24   | 1.398±0.471  | 8.64E-16 |
| cg16446783 | 11 | 18193360  | MRGPRX4    | 1.168±0.26   | 0.184±0.624  | 8.73E-16 |
| cg22984277 | 12 | 8694212   | CLEC4E     | 1.51±0.218   | 1.02±0.292   | 9.13E-16 |
| cg02161900 | 10 | 28035631  | MKX        | -2.431±0.259 | -0.835±1.01  | 9.33E-16 |
| cg15607672 | 14 | 57277227  | OTX2       | -1.92±0.222  | -0.499±0.899 | 9.33E-16 |
| cg18159180 | 6  | 43022213  | CUL7       | 0.129±0.335  | 1.133±0.632  | 9.36E-16 |
| cg12448933 | 17 | 72667378  | RAB37      | -2.115±0.439 | -0.678±0.91  | 9.47E-16 |

|            |    |           |                 |              |              |          |
|------------|----|-----------|-----------------|--------------|--------------|----------|
| cg14419187 | 2  | 210637094 | <i>UNC80</i>    | -2.421±0.516 | -0.536±1.199 | 9.81E-16 |
| cg24440147 | 9  | 131464516 | <i>PKN3</i>     | 1.239±0.291  | 0.283±0.606  | 9.83E-16 |
| cg00005847 | 2  | 177029073 | <i>HOXD3</i>    | -1.877±0.304 | -0.549±0.846 | 9.92E-16 |
| cg24365867 | 11 | 10715595  | <i>MRVI1</i>    | 0.001±0.304  | 0.919±0.579  | 1.01E-15 |
| cg21949305 | 22 | 24828655  | <i>ADORA2A</i>  | -0.145±0.43  | 1.277±0.902  | 1.03E-15 |
| cg14196790 | 5  | 131705035 | <i>SLC22A5</i>  | -2.225±0.389 | -2.998±0.435 | 1.03E-15 |
| cg23097006 | 20 | 25063817  | <i>VSX1</i>     | -3.258±0.398 | -1.396±1.187 | 1.06E-15 |
| cg14201617 | 2  | 47382452  | <i>C2orf61</i>  | 2.281±0.38   | 3.05±0.438   | 1.06E-15 |
| cg09009380 | 1  | 201252974 | <i>PKP1</i>     | -0.844±0.379 | 0.224±0.671  | 1.08E-15 |
| cg05436658 | 16 | 23847568  | <i>PRKCB</i>    | -4.538±0.417 | -1.637±1.841 | 1.09E-15 |
| cg03802191 | 1  | 234615169 | <i>TARBP1</i>   | 0.745±0.225  | -0.117±0.55  | 1.10E-15 |
| cg03355526 | 5  | 178368415 | <i>ZNF454</i>   | -1.198±0.518 | 0.089±0.793  | 1.16E-15 |
| cg08441806 | 10 | 134599149 | <i>NKX6-2</i>   | -1.194±0.588 | -0.018±0.666 | 1.17E-15 |
| cg02955988 | 4  | 128885294 | <i>C4orf29</i>  | 0.468±0.207  | -0.132±0.378 | 1.18E-15 |
| cg03022541 | 3  | 128186859 | <i>DNAJB8</i>   | 1.264±0.214  | 0.311±0.609  | 1.20E-15 |
| cg12441928 | 3  | 46249985  | <i>CCR1</i>     | -3.057±0.391 | -4.12±0.667  | 1.21E-15 |
| cg04549333 | 11 | 44325823  | <i>ALX4</i>     | -3.171±0.458 | -1.432±1.112 | 1.21E-15 |
| cg14958635 | 5  | 134870977 | <i>NEUROG1</i>  | -2.953±0.662 | -0.937±1.279 | 1.25E-15 |
| cg15107670 | 11 | 32456759  | <i>WT1</i>      | -3.248±0.925 | -1.159±1.257 | 1.26E-15 |
| cg00949442 | 16 | 2391828   | <i>ABCA17P</i>  | -3.058±0.519 | -0.651±1.543 | 1.31E-15 |
| cg03294491 | 18 | 45458243  | <i>SMAD2</i>    | -0.959±0.325 | -2.064±0.706 | 1.31E-15 |
| cg15746620 | 19 | 14785849  | <i>EMR3</i>     | -1.057±0.35  | -2.16±0.703  | 1.32E-15 |
| cg25971347 | 16 | 86544339  | <i>FOXF1</i>    | -5.199±0.851 | -2.289±1.862 | 1.35E-15 |
| cg26200585 | 19 | 40919245  | <i>PRX</i>      | -0.154±0.486 | 1.22±0.868   | 1.37E-15 |
| cg17214107 | 4  | 123747542 | <i>FGF2</i>     | -2.357±0.348 | -1.106±0.802 | 1.38E-15 |
| cg16415058 | 10 | 108923781 | <i>SORCS1</i>   | -2.095±0.358 | -0.959±0.724 | 1.39E-15 |
| cg17016000 | 20 | 19869644  | <i>RIN2</i>     | -0.476±0.44  | 0.756±0.779  | 1.49E-15 |
| cg27091787 | 3  | 50360690  | <i>HYAL2</i>    | -0.707±0.362 | 0.152±0.527  | 1.49E-15 |
| cg02868123 | 2  | 79382913  | <i>O</i>        | 2.097±0.264  | 0.851±0.802  | 1.51E-15 |
| cg19594666 | 7  | 127881280 | <i>LEP</i>      | -0.648±0.484 | 0.685±0.841  | 1.53E-15 |
| cg15988232 | 3  | 47621127  | <i>CSPG5</i>    | -0.525±0.272 | 0.664±0.766  | 1.54E-15 |
| cg26164184 | 9  | 137771506 | <i>FCN2</i>     | 2.862±0.359  | 1.327±0.989  | 1.59E-15 |
| cg19418515 | 15 | 67539555  | <i>AAGAB</i>    | 1.302±0.203  | 0.692±0.389  | 1.67E-15 |
| cg26066361 | 12 | 10282621  | <i>CLEC7A</i>   | 0.886±0.261  | -0.211±0.708 | 1.72E-15 |
| cg02920216 | 21 | 19616939  | <i>CHODL</i>    | -1.996±0.296 | -0.827±0.755 | 1.78E-15 |
| cg18236477 | 13 | 26043066  | <i>ATP8A2</i>   | -2.199±0.375 | -0.419±1.149 | 1.79E-15 |
| cg07922606 | 6  | 26225389  | <i>HIST1H3E</i> | 1.204±0.311  | 2.498±0.837  | 1.87E-15 |
| cg15539420 | 17 | 46692248  | <i>HOXB8</i>    | -1.614±0.251 | -0.086±0.985 | 1.87E-15 |
| cg22658979 | 11 | 102826469 | <i>MMP13</i>    | 2.567±0.395  | 1.133±0.927  | 1.90E-15 |
| cg08278554 | 15 | 45722919  | <i>C15orf48</i> | -2.372±0.461 | -3.281±0.519 | 1.96E-15 |
| cg14709481 | 5  | 176325836 | <i>HK3</i>      | 1.831±0.259  | 0.821±0.654  | 1.97E-15 |
| cg21376883 | 1  | 236850232 | <i>ACTN2</i>    | -2.439±0.467 | -0.733±1.105 | 2.07E-15 |
| cg10236239 | 2  | 108994514 | <i>SULT1C4</i>  | -1.483±0.363 | -0.271±0.783 | 2.12E-15 |
| cg07639720 | 15 | 83952875  | <i>BNC1</i>     | -3.684±0.403 | -2.368±0.849 | 2.13E-15 |
| cg08886154 | 7  | 127256676 | <i>PAX4</i>     | 0.823±0.238  | -0.168±0.643 | 2.15E-15 |
| cg21504624 | 9  | 34653580  | <i>IL11RA</i>   | -1.374±0.298 | -0.551±0.525 | 2.30E-15 |
| cg22994720 | 11 | 74441988  | <i>CHRD12</i>   | -3.328±0.42  | -1.623±1.108 | 2.31E-15 |
| cg26060255 | 20 | 3025968   | <i>MRPS26</i>   | -0.891±0.226 | -1.659±0.497 | 2.32E-15 |
| cg08758850 | 9  | 127533554 | <i>NR6A1</i>    | -3.206±0.404 | -2.322±0.535 | 2.37E-15 |
| cg06821993 | 8  | 114449011 | <i>CSMD3</i>    | -3.094±0.379 | -1.32±1.154  | 2.42E-15 |
| cg22398616 | 13 | 53314203  | <i>LECT1</i>    | -0.009±0.263 | 0.75±0.487   | 2.44E-15 |
| cg21165909 | 2  | 211419938 | <i>CPS1</i>     | 1.876±0.325  | 0.756±0.727  | 2.49E-15 |
| cg00325491 | 11 | 93286170  | <i>O</i>        | 1.411±0.347  | 0.264±0.744  | 2.50E-15 |
| cg15679095 | 6  | 42789053  | <i>GLTSCR1L</i> | 1.226±0.294  | 1.979±0.477  | 2.50E-15 |
| cg04810997 | 7  | 143140674 | <i>TAS2R60</i>  | 2.121±0.266  | 0.677±0.939  | 2.51E-15 |
| cg19863740 | 22 | 44576869  | <i>PARVG</i>    | 0.416±0.24   | -0.525±0.613 | 2.53E-15 |
| cg06038133 | 17 | 27944585  | <i>CORO6</i>    | -0.266±0.45  | -1.797±0.996 | 2.73E-15 |
| cg23350580 | 17 | 34592075  | <i>TBC1D3C</i>  | 1.512±0.212  | 0.849±0.43   | 2.79E-15 |
| cg24355048 | 14 | 25045028  | <i>CTSG</i>     | 0.833±0.303  | -0.372±0.787 | 2.84E-15 |
| cg08583049 | 15 | 60296815  | <i>FOXB1</i>    | -4.739±0.499 | -2.789±1.274 | 2.88E-15 |
| cg20951444 | 1  | 33337112  | <i>FNDC5</i>    | 0.997±0.251  | -0.042±0.68  | 2.92E-15 |
| cg21460081 | 17 | 46656012  | <i>HOXB4</i>    | -3.746±0.328 | -1.619±1.385 | 2.92E-15 |
| cg14882700 | 4  | 4228571   | <i>OTOP1</i>    | -1.732±0.47  | -0.327±0.909 | 2.95E-15 |
| cg25549459 | 2  | 105471252 | <i>POU3F3</i>   | -3.398±0.373 | -1.698±1.112 | 2.99E-15 |
| cg26780333 | 14 | 74058972  | <i>ACOT4</i>    | -3.679±0.506 | -1.958±1.123 | 3.11E-15 |
| cg26608332 | 22 | 20861476  | <i>MED15</i>    | 0.832±0.265  | 1.599±0.496  | 3.15E-15 |
| cg26201213 | 10 | 131265796 | <i>MGMT</i>     | 0.017±0.221  | -0.669±0.446 | 3.25E-15 |

|            |    |           |                  |              |              |          |
|------------|----|-----------|------------------|--------------|--------------|----------|
| cg18555117 | 14 | 53620401  | <i>DDHD1</i>     | -2.141±0.301 | -3.048±0.589 | 3.28E-15 |
| cg20289911 | 20 | 816362    | <i>FAM110A</i>   | -2.046±0.389 | -0.908±0.737 | 3.30E-15 |
| cg06908778 | 10 | 22634602  | <i>SPAG6</i>     | -2.454±0.417 | -0.633±1.194 | 3.33E-15 |
| cg04304130 | 6  | 11111894  | <i>ERVFRD-1</i>  | 1.227±0.358  | 1.938±0.417  | 3.34E-15 |
| cg02168291 | 16 | 82671520  | <i>CDH13</i>     | 1.915±0.298  | 0.567±0.884  | 3.36E-15 |
| cg10762615 | 17 | 18647327  | <i>FBXW10</i>    | -0.125±0.405 | 0.955±0.693  | 3.42E-15 |
| cg27456885 | 21 | 31972913  | <i>KRTAP22-1</i> | 1.957±0.209  | 0.9±0.694    | 3.46E-15 |
| cg11896923 | 17 | 37825027  | <i>PNMT</i>      | -1.697±0.218 | -2.468±0.506 | 3.59E-15 |
| cg11241627 | 7  | 19185165  | <i>FERD3L</i>    | -3.806±0.418 | -2.14±1.095  | 3.62E-15 |
| cg07103493 | 5  | 128301232 | <i>SLC27A6</i>   | -2.575±0.597 | -1.044±0.978 | 3.66E-15 |
| cg10481740 | 4  | 1857103   | <i>LETM1</i>     | -3.173±0.369 | -3.919±0.442 | 3.72E-15 |
| cg13797031 | 22 | 29977742  | <i>NIPSNAP1</i>  | 1.796±0.206  | 0.281±0.992  | 3.85E-15 |
| cg15430659 | 10 | 101090558 | <i>CNNM1</i>     | 0.698±0.355  | 1.632±0.6    | 3.96E-15 |
| cg16428251 | 3  | 137483479 | <i>SOX14</i>     | -2.651±0.527 | -1.114±1     | 4.08E-15 |
| cg21275690 | 16 | 3072970   | <i>THOC6</i>     | 0.225±0.312  | -0.43±0.397  | 4.11E-15 |
| cg21665774 | 19 | 34790692  | <i>KIAA0355</i>  | 0.304±0.3    | 1.042±0.469  | 4.18E-15 |
| cg01806928 | 11 | 7272804   | <i>SYT9</i>      | -1.721±0.308 | -0.573±0.757 | 4.29E-15 |
| cg22268164 | 8  | 110099750 | <i>TRHR</i>      | 1.857±0.417  | 0.085±1.172  | 4.67E-15 |
| cg11743470 | 5  | 74327277  | <i>GCNT4</i>     | -0.383±0.298 | 0.239±0.377  | 4.75E-15 |
| cg26555310 | 1  | 68914717  | <i>RPE65</i>     | 1.489±0.413  | 2.416±0.578  | 4.79E-15 |
| cg01152019 | 2  | 177015044 | <i>MIR10B</i>    | -3.227±0.496 | -1.398±1.209 | 4.82E-15 |
| cg12052765 | 10 | 50816963  | <i>CHAT</i>      | -3.554±0.373 | -1.991±1.035 | 4.87E-15 |
| cg26789453 | 12 | 112452424 | <i>ERP29</i>     | 0.392±0.413  | -1.01±0.925  | 5.01E-15 |
| cg01449591 | 5  | 70320537  | <i>NAIP</i>      | 2.459±0.232  | 1.844±0.398  | 5.01E-15 |
| cg25044651 | 5  | 115298720 | <i>AQPEP</i>     | -1.798±0.549 | -0.236±1.02  | 5.01E-15 |
| cg21414251 | 6  | 29364554  | <i>OR12D2</i>    | 0.487±0.245  | -0.676±0.771 | 5.02E-15 |
| cg20767356 | 1  | 150693100 | <i>HORMAD1</i>   | 2.741±0.361  | 3.426±0.395  | 5.14E-15 |
| cg03734874 | 14 | 105071382 | <i>TMEM179</i>   | -1.539±0.564 | -0.143±0.894 | 5.19E-15 |
| cg25964007 | 17 | 9479910   | <i>WDR16</i>     | -1.797±0.6   | -3.629±1.204 | 5.19E-15 |
| cg04720330 | 11 | 2949813   | <i>PHLDA2</i>    | -2.14±0.367  | -3.131±0.643 | 5.22E-15 |
| cg08411049 | 18 | 61144250  | <i>SERPINB5</i>  | 1.886±0.434  | 0.706±0.767  | 5.22E-15 |
| cg24989962 | 14 | 52734286  | <i>PTGDR</i>     | -2.925±0.64  | -0.799±1.405 | 5.36E-15 |
| cg14424579 | 2  | 27274309  | <i>AGBL5</i>     | -4.241±0.307 | -4.868±0.379 | 5.42E-15 |
| cg06295856 | 11 | 14993642  | <i>CALCA</i>     | -2.796±0.627 | -1.364±0.901 | 5.49E-15 |
| cg20828084 | 15 | 81070851  | <i>KIAA1199</i>  | 2.288±0.255  | 1.102±0.788  | 5.55E-15 |
| cg14162076 | 12 | 8665092   | <i>CLEC4D</i>    | 2.604±0.39   | 1.294±0.867  | 5.57E-15 |
| cg09313705 | 17 | 46622491  | <i>HOXB2</i>     | -1.181±0.295 | -0.166±0.673 | 5.85E-15 |
| cg06123346 | 19 | 36054519  | <i>ATP4A</i>     | 0.245±0.265  | -0.734±0.65  | 5.85E-15 |
| cg06850526 | 17 | 79269886  | <i>SLC38A10</i>  | 0.179±0.31   | -0.98±0.771  | 5.87E-15 |
| cg13262687 | 4  | 147559579 | <i>POU4F2</i>    | -2.928±0.352 | -1.264±1.107 | 5.97E-15 |
| cg24929834 | 22 | 29457241  | <i>C22orf31</i>  | 0.485±0.292  | 1.317±0.546  | 6.01E-15 |
| cg16886259 | 13 | 49281222  | <i>CYSLTR2</i>   | 1.726±0.291  | 0.695±0.685  | 6.12E-15 |
| cg04999691 | 7  | 150027050 | <i>ZBED6CL</i>   | 0.273±0.218  | 1.029±0.502  | 6.15E-15 |
| cg27622610 | 17 | 3030185   | <i>OR1G1</i>     | 1.08±0.307   | -0.082±0.773 | 6.17E-15 |
| cg12238343 | 5  | 33936402  | <i>RXFP3</i>     | -4.314±0.451 | -2.334±1.32  | 6.28E-15 |
| cg14012294 | 5  | 72794041  | <i>BTF3</i>      | -4.181±0.501 | -5.069±0.484 | 6.29E-15 |
| cg27560864 | 11 | 118024339 | <i>SCN4B</i>     | -1.162±0.191 | -0.308±0.57  | 6.32E-15 |
| cg19789466 | 12 | 113344923 | <i>OAS1</i>      | -3.133±0.38  | -4.161±0.671 | 6.42E-15 |
| cg15005385 | 17 | 34626054  | <i>CCL3L1</i>    | 0.598±0.286  | -0.626±0.816 | 6.45E-15 |
| cg14472601 | 5  | 180019112 | <i>SCGB3A1</i>   | 0.879±0.321  | 0.096±0.504  | 6.66E-15 |
| cg20876010 | 1  | 64971752  | <i>CACHD1</i>    | -0.132±0.26  | -1.021±0.592 | 6.77E-15 |
| cg27059238 | 6  | 26273326  | <i>HIST1H2BI</i> | -1.361±0.264 | -0.798±0.35  | 7.38E-15 |
| cg09068492 | 11 | 14993658  | <i>CALCA</i>     | -3.042±0.519 | -1.475±1.039 | 7.47E-15 |
| cg18752880 | 5  | 34043509  | <i>C1QTNF3</i>   | -1.77±0.499  | -0.411±0.893 | 7.56E-15 |
| cg23984130 | 2  | 89215185  | <i>0</i>         | 2.249±0.224  | 0.835±0.944  | 7.58E-15 |
| cg09243021 | 7  | 142985019 | <i>CASP2</i>     | -1.038±0.406 | 0.243±0.852  | 7.58E-15 |
| cg20848130 | 1  | 228337776 | <i>GJC2</i>      | 0.829±0.268  | 1.646±0.542  | 7.61E-15 |
| cg15166089 | 1  | 27710030  | <i>CD164L2</i>   | 1.154±0.162  | 0.388±0.513  | 7.62E-15 |
| cg16954341 | 6  | 25652381  | <i>SCGN</i>      | -1.861±0.386 | -0.463±0.934 | 7.62E-15 |
| cg06771126 | 4  | 57547699  | <i>HOPX</i>      | -1.042±0.414 | -2.068±0.665 | 7.69E-15 |
| cg02196730 | 15 | 80188777  | <i>MTHFS</i>     | -2.392±0.494 | -3.347±0.565 | 7.77E-15 |
| cg26282384 | 5  | 140767200 | <i>PCDHGB4</i>   | -3.522±0.445 | -2.06±0.976  | 8.19E-15 |
| cg17827767 | 10 | 86001154  | <i>LRIT1</i>     | 1.515±0.313  | 0.265±0.839  | 8.70E-15 |
| cg16463460 | 11 | 32454718  | <i>WT1</i>       | -0.819±0.286 | -0.012±0.534 | 8.72E-15 |
| cg22143352 | 14 | 75897841  | <i>JDP2</i>      | -0.044±0.334 | 0.734±0.498  | 8.87E-15 |
| cg00466249 | 17 | 79269884  | <i>SLC38A10</i>  | 0.122±0.247  | -0.877±0.671 | 8.88E-15 |
| cg26656452 | 10 | 115313165 | <i>HABP2</i>     | 2.319±0.283  | 1.058±0.848  | 8.88E-15 |

|            |    |           |                  |              |              |          |
|------------|----|-----------|------------------|--------------|--------------|----------|
| cg14564494 | 21 | 37506911  | <i>CBR3</i>      | -1.095±0.341 | -2.095±0.665 | 9.01E-15 |
| cg13899108 | 19 | 18344322  | <i>PDE4C</i>     | -0.066±0.248 | 0.472±0.337  | 9.23E-15 |
| cg15343119 | 18 | 74961785  | <i>GALR1</i>     | -2.989±0.518 | -1.306±1.126 | 9.23E-15 |
| cg26687173 | 19 | 33623091  | <i>WDR88</i>     | 1.275±0.386  | 2.3±0.674    | 9.24E-15 |
| cg03662459 | 9  | 34654290  | <i>IL11RA</i>    | 0.768±0.235  | 1.367±0.392  | 9.37E-15 |
| cg00629217 | 4  | 54425349  | <i>LNK1</i>      | 1.187±0.334  | 1.818±0.37   | 9.38E-15 |
| cg25645462 | 16 | 57653702  | <i>GPR56</i>     | 1.884±0.341  | 0.785±0.736  | 9.46E-15 |
| cg11172423 | 1  | 43205623  | <i>CLDN19</i>    | 1.138±0.349  | 2.15±0.673   | 9.65E-15 |
| cg20018806 | 11 | 59633874  | <i>TCN1</i>      | 1.266±0.243  | 0.215±0.709  | 9.95E-15 |
| cg24130010 | 21 | 19617176  | <i>CHODL</i>     | -2.011±0.509 | -0.369±1.101 | 1.02E-14 |
| cg01680823 | 17 | 37822045  | <i>TCAP</i>      | 1.441±0.181  | 0.566±0.591  | 1.07E-14 |
| cg14902389 | 2  | 99342685  | <i>MGAT4A</i>    | 1.059±0.276  | 1.825±0.509  | 1.08E-14 |
| cg23587449 | 4  | 155663689 | <i>LRAT</i>      | -3.164±0.446 | -1.347±1.228 | 1.09E-14 |
| cg14701962 | 1  | 162348010 | <i>C1orf226</i>  | 0.842±0.261  | 1.702±0.579  | 1.23E-14 |
| cg23054883 | 12 | 130647580 | <i>FZD10</i>     | -3.14±0.7    | -1.067±1.391 | 1.29E-14 |
| cg24650501 | 1  | 165324990 | <i>LMX1A</i>     | -3.372±0.345 | -1.891±1.006 | 1.31E-14 |
| cg24505341 | 3  | 62861544  | <i>CADPS</i>     | -1.456±0.297 | -0.392±0.721 | 1.32E-14 |
| cg18818531 | 11 | 65668277  | <i>FOSL1</i>     | -0.527±0.315 | -1.668±0.773 | 1.33E-14 |
| cg25298754 | 3  | 111314102 | <i>ZBED2</i>     | -0.037±0.267 | -1.079±0.708 | 1.40E-14 |
| cg16708981 | 19 | 53758609  | <i>ZNF677</i>    | -1.818±0.585 | -0.395±0.933 | 1.44E-14 |
| cg16902509 | 10 | 15761312  | <i>ITGA8</i>     | -2.294±0.293 | -0.988±0.888 | 1.44E-14 |
| cg00221494 | 13 | 98794593  | <i>FRAP1</i>     | -1.546±0.341 | -3.027±1.008 | 1.44E-14 |
| cg21546671 | 17 | 46655387  | <i>HOXB4</i>     | -3.611±0.398 | -1.041±1.745 | 1.48E-14 |
| cg23158811 | 19 | 19729732  | <i>PBX4</i>      | -3.968±0.496 | -4.962±0.614 | 1.48E-14 |
| cg27553955 | 2  | 42720326  | <i>KCNG3</i>     | -1.603±0.34  | -0.502±0.746 | 1.51E-14 |
| cg03387497 | 20 | 17680945  | <i>BANF2</i>     | 2.118±0.251  | 1.088±0.702  | 1.53E-14 |
| cg24471894 | 9  | 2838508   | <i>KIAA0020</i>  | -2.878±0.369 | -1.686±0.808 | 1.53E-14 |
| cg06580318 | 2  | 169747119 | <i>SPC25</i>     | -3.428±0.4   | -4.23±0.496  | 1.53E-14 |
| cg13531460 | 2  | 231790813 | <i>GPR55</i>     | 1.467±0.35   | 0.604±0.569  | 1.56E-14 |
| cg23037403 | 5  | 178368183 | <i>ZNF454</i>    | -2.373±0.678 | -0.695±1.107 | 1.56E-14 |
| cg02173484 | 1  | 147245168 | <i>GJA5</i>      | -1.196±0.242 | -0.283±0.622 | 1.58E-14 |
| cg13234863 | 12 | 130389138 | <i>TMEM132D</i>  | -2.415±0.458 | -0.8±1.098   | 1.59E-14 |
| cg17385448 | 1  | 15911702  | <i>AGMAT</i>     | -0.594±0.278 | -1.289±0.46  | 1.61E-14 |
| cg18841634 | 18 | 49868236  | <i>DCC</i>       | -4.089±0.434 | -2.728±0.922 | 1.64E-14 |
| cg07175883 | 2  | 176957908 | <i>HOXD13</i>    | -4.647±0.777 | -2.358±1.545 | 1.68E-14 |
| cg24784109 | 6  | 26200116  | <i>HIST1H2BF</i> | -2.763±0.279 | -1.452±0.896 | 1.69E-14 |
| cg11354906 | 4  | 154710371 | <i>SFRP2</i>     | -3.318±0.314 | -1.47±1.262  | 1.73E-14 |
| cg09061733 | 11 | 57364841  | <i>SERPING1</i>  | -0.767±0.389 | 0.6±0.932    | 1.74E-14 |
| cg08307963 | 1  | 147245485 | <i>GJA5</i>      | -3.411±0.38  | -1.684±1.181 | 1.74E-14 |
| cg03534410 | 3  | 12801112  | <i>TMEM40</i>    | 2.354±0.52   | 1.292±0.665  | 1.74E-14 |
| cg11068096 | 17 | 39742623  | <i>KRT14</i>     | 1.804±0.238  | 1.187±0.412  | 1.78E-14 |
| cg03109316 | 3  | 113957903 | <i>ZNF80</i>     | 2.473±0.312  | 0.947±1.044  | 1.79E-14 |
| cg19345602 | 11 | 125615388 | <i>PATE1</i>     | 0.172±0.237  | -0.838±0.691 | 1.82E-14 |
| cg15560337 | 7  | 123484898 | <i>HYAL4</i>     | 1.448±0.359  | 0.199±0.853  | 1.84E-14 |
| cg19297823 | 5  | 74327281  | <i>GCNT4</i>     | -0.749±0.372 | 0.089±0.544  | 1.86E-14 |
| cg16627949 | 14 | 21526351  | <i>RNASE8</i>    | 1.075±0.338  | 0.153±0.62   | 1.89E-14 |
| cg23447996 | 9  | 93564603  | <i>SYK</i>       | -1.209±0.313 | -1.977±0.508 | 1.91E-14 |
| cg05755779 | 8  | 120079625 | <i>COLEC10</i>   | 1.168±0.452  | 2.116±0.601  | 1.91E-14 |
| cg03996822 | 4  | 74486558  | <i>RASSF6</i>    | -0.003±0.292 | -1.01±0.688  | 1.93E-14 |
| cg22876908 | 12 | 56325149  | <i>DGKA</i>      | -0.958±0.187 | -1.662±0.482 | 1.95E-14 |
| cg20881910 | 11 | 131780332 | <i>NTM</i>       | -3.17±0.717  | -1.145±1.368 | 1.97E-14 |
| cg06226384 | 17 | 64873351  | <i>CACNG5</i>    | -0.384±0.272 | -1.525±0.783 | 2.02E-14 |
| cg15238200 | 17 | 73893634  | <i>TRIM65</i>    | 0.945±0.231  | 1.616±0.455  | 2.03E-14 |
| cg09260089 | 10 | 134599860 | <i>NKX6-2</i>    | -3.082±0.524 | -1.246±1.258 | 2.04E-14 |
| cg22951794 | 11 | 6867280   | <i>OR10A5</i>    | 1.676±0.272  | 0.607±0.735  | 2.14E-14 |
| cg19205041 | 6  | 143929511 | <i>PHACTR2</i>   | 0.728±0.39   | 1.863±0.771  | 2.16E-14 |
| cg16092786 | 11 | 32455735  | <i>WT1</i>       | -3.136±0.309 | -1.584±1.067 | 2.18E-14 |
| cg26162582 | 12 | 4918391   | <i>KCNA6</i>     | -3.622±0.595 | -1.252±1.63  | 2.20E-14 |
| cg05508084 | 19 | 56988398  | <i>ZNF667</i>    | -2.95±0.436  | -1.404±1.062 | 2.28E-14 |
| cg00055233 | 9  | 5339677   | <i>RLN1</i>      | -0.076±0.203 | -0.853±0.535 | 2.31E-14 |
| cg02764897 | 21 | 31768311  | <i>KRTAP13-1</i> | 0.82±0.283   | -0.355±0.81  | 2.34E-14 |
| cg18788940 | 11 | 20385085  | <i>HTATIP2</i>   | -0.433±0.18  | -1.201±0.529 | 2.35E-14 |
| cg18156583 | 2  | 103035227 | <i>IL18RAP</i>   | 0.205±0.368  | -0.932±0.776 | 2.36E-14 |
| cg02422694 | 17 | 46655790  | <i>HOXB4</i>     | -3.761±0.31  | -1.697±1.419 | 2.38E-14 |
| cg15177359 | 17 | 73840750  | <i>UNC13D</i>    | -1.303±0.257 | -2.159±0.588 | 2.42E-14 |
| cg12564453 | 16 | 56995840  | <i>CETP</i>      | 0.807±0.272  | 1.749±0.647  | 2.43E-14 |
| cg25119415 | 1  | 158799935 | <i>MNDA</i>      | 1.425±0.289  | 0.034±0.96   | 2.47E-14 |

|            |    |           |                   |              |              |          |
|------------|----|-----------|-------------------|--------------|--------------|----------|
| cg06244417 | 9  | 137809628 | <i>FCN1</i>       | 1.65±0.239   | 0.652±0.689  | 2.50E-14 |
| cg05337441 | 2  | 21266568  | <i>APOB</i>       | -1.219±0.37  | -2.326±0.757 | 2.52E-14 |
| cg17199483 | 16 | 16042767  | <i>ABCC1</i>      | -1.503±0.384 | -2.53±0.694  | 2.53E-14 |
| cg03266453 | 2  | 119606055 | <i>EN1</i>        | -3.155±0.391 | -1.766±0.957 | 2.58E-14 |
| cg24063382 | 6  | 29457061  | <i>MAS1L</i>      | 1.715±0.232  | 0.805±0.629  | 2.59E-14 |
| cg07455975 | 2  | 175112849 | <i>OLA1</i>       | -3.567±0.301 | -4.385±0.554 | 2.60E-14 |
| cg22341310 | 19 | 48048583  | <i>ZNF541</i>     | -1.642±0.615 | -0.25±0.914  | 2.63E-14 |
| cg20537629 | 7  | 79083944  | <i>MAGI2-AS3</i>  | -2.657±0.405 | -1.313±0.925 | 2.66E-14 |
| cg24887211 | 14 | 77292625  | <i>C14orf166B</i> | 1.512±0.339  | 0.551±0.656  | 2.75E-14 |
| cg08077673 | 7  | 130126368 | <i>MEST</i>       | -0.99±0.331  | -2.125±0.783 | 2.79E-14 |
| cg17706173 | 16 | 1582581   | <i>TMEM204</i>    | -0.531±0.363 | 0.489±0.695  | 2.81E-14 |
| cg18484189 | 11 | 7984973   | <i>NLRP10</i>     | 0.875±0.292  | -0.257±0.783 | 2.81E-14 |
| cg17412258 | 14 | 101193017 | <i>DLK1</i>       | -4.213±0.668 | -2.197±1.383 | 2.82E-14 |
| cg25778479 | 7  | 16686771  | <i>BZW2</i>       | -0.784±0.424 | -1.936±0.783 | 2.82E-14 |
| cg10054857 | 18 | 61816543  | <i>LINC00305</i>  | 1.563±0.255  | 0.234±0.92   | 2.82E-14 |
| cg18674980 | 8  | 86350581  | <i>CA3</i>        | -3.899±0.416 | -1.71±1.516  | 2.82E-14 |
| cg07959477 | 12 | 10251879  | <i>CLEC1A</i>     | -0.231±0.322 | 0.608±0.567  | 2.90E-14 |
| cg20885089 | 1  | 110162701 | <i>AMPD2</i>      | -3.852±0.284 | -4.309±0.235 | 2.91E-14 |
| cg09099744 | 9  | 21968372  | <i>CDKN2A</i>     | -3.524±0.522 | -1.232±1.589 | 2.97E-14 |
| cg05546044 | 22 | 22222597  | <i>MAPK1</i>      | -0.367±0.356 | -1.356±0.674 | 2.97E-14 |
| cg15979932 | 17 | 55980107  | <i>CUEDC1</i>     | 0.195±0.313  | -0.87±0.736  | 3.09E-14 |
| cg02681442 | 14 | 29236008  | <i>FOXP1</i>      | -3.058±0.416 | -1.137±1.334 | 3.12E-14 |
| cg04072323 | 2  | 229046325 | <i>SPHKAP</i>     | -3.782±0.519 | -1.956±1.265 | 3.15E-14 |
| cg00679556 | 6  | 30080782  | <i>TRIM31</i>     | 0.915±0.252  | -0.171±0.755 | 3.16E-14 |
| cg25087423 | 11 | 118754535 | <i>CXCR5</i>      | 3.24±0.523   | 1.901±0.906  | 3.23E-14 |
| cg00627233 | 2  | 79251911  | <i>REG3G</i>      | 0.905±0.257  | -0.106±0.702 | 3.30E-14 |
| cg06015218 | 6  | 146350434 | <i>GRM1</i>       | -3.763±0.421 | -2.239±1.058 | 3.36E-14 |
| cg04080057 | 19 | 54495183  | <i>CACNG6</i>     | -1.195±0.221 | -0.292±0.628 | 3.43E-14 |
| cg26907768 | 16 | 87902420  | <i>SLC7A5</i>     | -2.977±0.23  | -3.572±0.403 | 3.45E-14 |
| cg17657618 | 1  | 15427654  | <i>KAZN</i>       | 0.267±0.365  | -1.1±0.951   | 3.52E-14 |
| cg13929328 | 10 | 129535898 | <i>FOXI2</i>      | -1.886±0.524 | -0.446±0.985 | 3.53E-14 |
| cg13302823 | 8  | 145559792 | <i>SCRT1</i>      | -0.974±0.31  | 0.096±0.743  | 3.55E-14 |
| cg03634234 | 7  | 152132218 | <i>KMT2C</i>      | -3.699±0.423 | -2.298±0.971 | 3.59E-14 |
| cg15913671 | 17 | 79304420  | <i>TMEM105</i>    | 0.399±0.264  | -0.564±0.67  | 3.63E-14 |
| cg12680609 | 8  | 144328500 | <i>ZFP41</i>      | -3.861±0.427 | -1.642±1.547 | 3.73E-14 |
| cg14544583 | 11 | 5248566   | <i>HBB</i>        | 1.584±0.301  | 0.375±0.843  | 3.74E-14 |
| cg13348944 | 11 | 118047121 | <i>SCN2B</i>      | -1.275±0.337 | -0.147±0.784 | 3.82E-14 |
| cg04891836 | 19 | 6670390   | <i>TNFSF14</i>    | 0.751±0.273  | -0.017±0.528 | 3.82E-14 |
| cg15422147 | 18 | 61144339  | <i>SERPINB5</i>   | 1.811±0.416  | 0.625±0.816  | 3.85E-14 |
| cg15949277 | 1  | 37939724  | <i>LOC728431</i>  | -3.572±0.333 | -4.211±0.398 | 3.86E-14 |
| cg11494699 | 11 | 36588217  | <i>RAG1</i>       | 2.19±0.282   | 1.241±0.66   | 3.93E-14 |
| cg00489401 | 5  | 180075875 | <i>FLT4</i>       | -2.542±0.874 | -0.515±1.354 | 3.95E-14 |
| cg16924616 | 7  | 96653617  | <i>DLX5</i>       | -3.814±0.666 | -1.621±1.525 | 3.97E-14 |
| cg01798589 | 3  | 36421572  | <i>STAC</i>       | -1.652±0.321 | -2.489±0.571 | 3.98E-14 |
| cg23303408 | 5  | 145718597 | <i>POU4F3</i>     | -2.981±0.422 | -1.582±0.973 | 4.02E-14 |
| cg13462129 | 7  | 96651281  | <i>DLX5</i>       | -1.178±0.265 | -0.041±0.796 | 4.13E-14 |
| cg03112433 | 7  | 90338555  | <i>CDK14</i>      | 0.439±0.346  | -0.797±0.862 | 4.15E-14 |
| cg21269934 | 4  | 2060219   | <i>NAT8L</i>      | -3.376±0.704 | -1.728±1.106 | 4.23E-14 |
| cg13351406 | 22 | 36031241  | <i>0</i>          | 1.237±0.307  | 0.414±0.565  | 4.23E-14 |
| cg15547534 | 7  | 100034410 | <i>PPP1R35</i>    | -3.544±0.257 | -4.264±0.496 | 4.23E-14 |
| cg11946503 | 5  | 134870514 | <i>NEUROG1</i>    | -2.594±0.332 | -1.236±0.951 | 4.33E-14 |
| cg08970694 | 11 | 5290746   | <i>HBE1</i>       | 0.841±0.244  | -0.304±0.803 | 4.43E-14 |
| cg16191009 | 3  | 9745369   | <i>CPNE9</i>      | 0.476±0.288  | 1.374±0.625  | 4.49E-14 |
| cg24777710 | 7  | 127636733 | <i>SND1-IT1</i>   | 2.191±0.275  | 2.726±0.338  | 4.51E-14 |
| cg17166338 | 5  | 1295969   | <i>TERT</i>       | 0.675±0.309  | 1.691±0.709  | 4.53E-14 |
| cg17738194 | 4  | 80329388  | <i>GK2</i>        | 0.764±0.317  | -0.408±0.82  | 4.54E-14 |
| cg06291867 | 10 | 92617162  | <i>HTR7</i>       | -2.385±0.47  | -0.888±1.043 | 4.66E-14 |
| cg23839680 | 7  | 56118238  | <i>PSPH</i>       | -0.139±0.367 | -1.111±0.66  | 4.90E-14 |
| cg19064258 | 16 | 22826117  | <i>HS3ST2</i>     | -2.628±0.497 | -0.919±1.197 | 4.91E-14 |
| cg25593948 | 6  | 50786670  | <i>TFAP2B</i>     | -2.452±0.264 | -1.322±0.794 | 4.91E-14 |
| cg11802013 | 11 | 69469175  | <i>CCND1</i>      | 1.992±0.286  | 1.181±0.562  | 5.00E-14 |
| cg04837071 | 9  | 140318649 | <i>NOXA1</i>      | 0.47±0.292   | -0.413±0.616 | 5.04E-14 |
| cg10409560 | 4  | 76481299  | <i>C4orf26</i>    | 2.146±0.415  | 0.931±0.844  | 5.14E-14 |
| cg27067618 | 19 | 15751949  | <i>CYP4F3</i>     | -0.979±0.284 | -1.774±0.55  | 5.18E-14 |
| cg19697981 | 6  | 108487820 | <i>NR2E1</i>      | -3.096±0.328 | -1.671±1.003 | 5.18E-14 |
| cg22815214 | 1  | 201083145 | <i>ASCL5</i>      | -1.259±0.416 | -2.218±0.645 | 5.18E-14 |
| cg16042149 | 22 | 29875947  | <i>NEFH</i>       | -3.043±0.48  | -1.429±1.131 | 5.23E-14 |

|            |    |           |           |              |              |          |
|------------|----|-----------|-----------|--------------|--------------|----------|
| cg27342801 | 2  | 79387273  | REG3A     | 2.108±0.273  | 0.566±1.085  | 5.41E-14 |
| cg12493906 | 11 | 5009311   | MMP26     | 2.05±0.241   | 0.643±0.99   | 5.48E-14 |
| cg20311730 | 11 | 7985183   | NLRP10    | 2.093±0.295  | 0.952±0.804  | 5.53E-14 |
| cg25004981 | 15 | 101085028 | CERS3     | 2.17±0.623   | 3.227±0.608  | 5.55E-14 |
| cg22628926 | 17 | 4844700   | RNF167    | -1.516±0.301 | -2.291±0.532 | 5.56E-14 |
| cg07295678 | 10 | 134000009 | DPYSL4    | -2.747±0.653 | -1.169±1.074 | 5.65E-14 |
| cg11474811 | 11 | 2443869   | TRPM5     | 1.738±0.248  | 0.747±0.699  | 5.67E-14 |
| cg04086012 | 4  | 189060900 | TRIML1    | 1.785±0.289  | 0.664±0.79   | 5.71E-14 |
| cg09829319 | 6  | 10882238  | GCM2      | -3.672±0.361 | -1.926±1.233 | 5.88E-14 |
| cg22881914 | 14 | 52536147  | NID2      | -3.534±0.856 | -0.746±1.958 | 5.89E-14 |
| cg06432655 | 19 | 36523405  | CLIP3     | -1.144±0.306 | 0.035±0.832  | 5.93E-14 |
| cg25764191 | 10 | 105037215 | INA       | -3.891±0.62  | -1.355±1.792 | 6.01E-14 |
| cg03270204 | 6  | 30851638  | DDR1      | 1.395±0.376  | 0.215±0.827  | 6.03E-14 |
| cg24719984 | 12 | 82153464  | PPFIA2    | -2.548±0.39  | -1.211±0.941 | 6.12E-14 |
| cg04802221 | 16 | 67223955  | EXOC3L1   | 0.559±0.31   | 1.238±0.454  | 6.31E-14 |
| cg15606663 | 21 | 31812603  | KRTAP15-1 | 0.855±0.218  | -0.224±0.764 | 6.36E-14 |
| cg22941086 | 12 | 40019883  | C12orf40  | 1.513±0.328  | 2.237±0.485  | 6.45E-14 |
| cg21282997 | 2  | 103035835 | IL18RAP   | 0.053±0.293  | -0.935±0.697 | 6.46E-14 |
| cg21279601 | 4  | 9782931   | DRD5      | -1.194±0.346 | -0.112±0.76  | 6.52E-14 |
| cg14277764 | 5  | 70671764  | PMCHL2    | 0.901±0.192  | 0.067±0.591  | 6.55E-14 |
| cg06825142 | 11 | 637170    | DRD4      | -4.438±0.799 | -1.633±1.98  | 6.58E-14 |
| cg00995520 | 1  | 111218282 | KCNA3     | -0.625±0.368 | 0.411±0.723  | 6.60E-14 |
| cg03388193 | 10 | 100996070 | HPSE2     | -3.786±0.406 | -2.034±1.242 | 6.73E-14 |
| cg26590537 | 12 | 5020202   | KCNA1     | -3.881±0.347 | -2.191±1.198 | 6.80E-14 |
| cg11911951 | 16 | 1430216   | UNKL      | 2.217±0.192  | 1.214±0.712  | 6.94E-14 |
| cg10848367 | 11 | 62009065  | SCGB1D2   | 0.422±0.25   | -0.506±0.657 | 6.95E-14 |
| cg13878010 | 3  | 123167276 | ADCY5     | -3.02±0.614  | -0.93±1.476  | 6.97E-14 |
| cg09458237 | 20 | 3712191   | HSPA12B   | 1.635±0.332  | 0.401±0.874  | 7.00E-14 |
| cg18940763 | 22 | 29197846  | XBP1      | -0.12±0.53   | -1.51±0.964  | 7.08E-14 |
| cg01072821 | 8  | 10382165  | PRSS55    | 0.858±0.308  | -0.078±0.658 | 7.16E-14 |
| cg14399060 | 2  | 177015070 | MIR10B    | -2.932±0.408 | -1.36±1.115  | 7.17E-14 |
| cg09837977 | 7  | 110731201 | LRRN3     | 0.459±0.338  | 1.428±0.679  | 7.18E-14 |
| cg19723473 | 2  | 168675040 | B3GALT1   | 1.505±0.298  | 0.287±0.865  | 7.24E-14 |
| cg22462235 | 1  | 226129481 | LEFTY2    | -0.292±0.313 | 0.6±0.625    | 7.28E-14 |
| cg21572897 | 3  | 119277821 | CD80      | 1.539±0.373  | 0.432±0.777  | 7.28E-14 |
| cg10883303 | 7  | 27239024  | HOXA13    | -3.209±0.749 | -0.888±1.635 | 7.30E-14 |
| cg02854090 | 6  | 25726895  | HIST1H2AA | 3.412±0.396  | 2.075±0.946  | 7.38E-14 |
| cg10586756 | 16 | 56782283  | NUP93     | 1.508±0.262  | 2.025±0.334  | 7.39E-14 |
| cg02721374 | 17 | 2996177   | OR1D2     | 1.896±0.302  | 1.002±0.629  | 7.63E-14 |
| cg26721264 | 18 | 74961727  | GALR1     | -3.746±0.674 | -1.641±1.486 | 7.75E-14 |
| cg25943276 | 11 | 131533284 | NTM       | 2.536±0.28   | 1.126±1.004  | 7.82E-14 |
| cg15627025 | 19 | 55327906  | KIR3DL1   | 2.469±0.161  | 1.561±0.646  | 7.82E-14 |
| cg27183007 | 7  | 50132975  | ZBPB      | 0.329±0.178  | 0.817±0.342  | 7.90E-14 |
| cg00134787 | 17 | 10419499  | MYH1      | 1.655±0.259  | 0.624±0.734  | 8.09E-14 |
| cg25564800 | 3  | 122234134 | KPNA1     | -2.748±0.384 | -3.686±0.646 | 8.09E-14 |
| cg19317715 | 17 | 40996578  | AOC2      | -0.908±0.332 | 0.163±0.758  | 8.20E-14 |
| cg11921829 | 1  | 157746930 | FCRL2     | 0.862±0.365  | -0.181±0.734 | 8.22E-14 |
| cg13549845 | 4  | 93225960  | GRID2     | -2.906±0.354 | -1.608±0.923 | 8.25E-14 |
| cg01318557 | 7  | 73624319  | LAT2      | -1.699±0.371 | -2.748±0.737 | 8.46E-14 |
| cg10683939 | 16 | 73178242  | C16orf47  | -0.084±0.389 | 0.903±0.685  | 8.48E-14 |
| cg12554573 | 3  | 51976667  | PARP3     | 0.484±0.215  | -0.321±0.574 | 8.61E-14 |
| cg04907257 | 5  | 7395318   | ADCY2     | -1.94±0.45   | -0.535±0.995 | 8.62E-14 |
| cg18771300 | 14 | 63671737  | RHOJ      | -1.005±0.425 | -0.017±0.677 | 8.87E-14 |
| cg26727372 | 18 | 48404491  | ME2       | -1.734±0.3   | -2.423±0.465 | 9.02E-14 |
| cg16028753 | 1  | 53527435  | PODN      | -2.223±0.246 | -1.133±0.779 | 9.03E-14 |
| cg06324671 | 21 | 31933511  | KRTAP19-7 | 3.601±0.259  | 2.49±0.794   | 9.18E-14 |
| cg02774439 | 4  | 174451251 | HAND2     | -3.286±0.333 | -1.586±1.216 | 9.23E-14 |
| cg02358804 | 19 | 36719212  | ZNF146    | 1.969±0.308  | 2.618±0.434  | 9.71E-14 |
| cg19553463 | 18 | 51038264  | DCC       | 0.608±0.124  | 0.286±0.225  | 9.81E-14 |
| cg13897627 | 16 | 49378497  | 0         | 1.567±0.234  | 0.471±0.785  | 9.83E-14 |
| cg26090660 | 4  | 80747125  | PCAT4     | 2.006±0.215  | 1.384±0.44   | 9.88E-14 |
| cg23696949 | 1  | 183155644 | LAMC2     | -0.124±0.263 | -1.082±0.684 | 9.90E-14 |
| cg17190608 | 12 | 111471489 | CUX2      | -4.476±0.446 | -2.338±1.532 | 9.95E-14 |
| cg06948294 | 14 | 25518624  | STXBP6    | -4.072±0.444 | -2.45±1.16   | 1.02E-13 |
| cg17963840 | 8  | 26722861  | ADRA1A    | -1.789±0.288 | -0.666±0.805 | 1.04E-13 |
| cg03483626 | 1  | 111218276 | KCNA3     | -0.768±0.485 | 0.342±0.761  | 1.05E-13 |
| cg22039846 | 19 | 55281253  | KIR2DL1   | 2.666±0.16   | 1.746±0.66   | 1.05E-13 |

|            |    |           |                   |              |              |          |
|------------|----|-----------|-------------------|--------------|--------------|----------|
| cg11290225 | 8  | 145692591 | <i>KIFC2</i>      | -2.475±0.279 | -3.107±0.433 | 1.09E-13 |
| cg02248486 | 7  | 27183196  | <i>HOXA5</i>      | -0.857±0.453 | 0.606±1.045  | 1.10E-13 |
| cg15446391 | 11 | 32452370  | <i>WT1</i>        | -0.769±0.331 | 0.119±0.625  | 1.13E-13 |
| cg06165395 | 1  | 37500790  | <i>GRIK3</i>      | -2.468±0.264 | -1.122±0.968 | 1.14E-13 |
| cg17267907 | 8  | 6838024   | <i>DEFA1B</i>     | 1.15±0.192   | 0.335±0.586  | 1.14E-13 |
| cg10281002 | 12 | 114846399 | <i>TBX5</i>       | -2.565±0.392 | -1.308±0.898 | 1.14E-13 |
| cg18885299 | 19 | 8952874   | <i>MBD3L1</i>     | 0.729±0.275  | 0.244±0.298  | 1.16E-13 |
| cg14262937 | 6  | 154360351 | <i>OPRM1</i>      | -3.007±0.549 | -1.491±1.071 | 1.16E-13 |
| cg03561565 | 8  | 99438624  | <i>KCNS2</i>      | -2.892±0.567 | -1.332±1.104 | 1.18E-13 |
| cg13696012 | 20 | 31595360  | <i>BPIFB2</i>     | 2.94±0.323   | 1.391±1.116  | 1.19E-13 |
| cg24287460 | 3  | 128748026 | <i>EFCC1</i>      | 2.632±0.304  | 1.916±0.495  | 1.20E-13 |
| cg27016494 | 7  | 96651586  | <i>DLX5</i>       | -1.184±0.254 | -0.28±0.649  | 1.20E-13 |
| cg04995095 | 17 | 72619556  | <i>CD300E</i>     | 0.889±0.259  | -0.416±0.94  | 1.21E-13 |
| cg18741908 | 3  | 169756818 | <i>GPR160</i>     | -0.877±0.333 | -1.933±0.755 | 1.22E-13 |
| cg07686479 | 1  | 165325030 | <i>LMX1A</i>      | -3.409±0.462 | -2.026±0.986 | 1.22E-13 |
| cg18349835 | 7  | 158937107 | <i>VIPR2</i>      | -5.059±0.952 | -2.198±2.04  | 1.23E-13 |
| cg19368582 | 10 | 88716646  | <i>MMRN2</i>      | 0.012±0.229  | 0.593±0.408  | 1.23E-13 |
| cg12768605 | 19 | 44324951  | <i>LYPD5</i>      | -3.145±0.63  | -1.254±1.349 | 1.25E-13 |
| cg22643217 | 21 | 32253964  | <i>KRTAP11-1</i>  | 0.957±0.42   | -0.089±0.724 | 1.29E-13 |
| cg10398682 | 15 | 83952019  | <i>BNC1</i>       | -1.77±0.3    | -0.381±1.002 | 1.29E-13 |
| cg05800321 | 8  | 143867799 | <i>LY6D</i>       | 2.738±0.371  | 1.754±0.695  | 1.31E-13 |
| cg20899321 | 11 | 76380605  | <i>LRRC32</i>     | 1.117±0.355  | 1.916±0.55   | 1.32E-13 |
| cg26482939 | 19 | 3136710   | <i>GNA15</i>      | -0.686±0.535 | -2.02±0.936  | 1.38E-13 |
| cg14449575 | 19 | 19373743  | <i>HAPLN4</i>     | -0.483±0.232 | 0.28±0.548   | 1.39E-13 |
| cg20247048 | 17 | 62972358  | <i>AMZ2P1</i>     | -3.074±0.287 | -3.883±0.576 | 1.41E-13 |
| cg08451957 | 2  | 114256406 | <i>FOXD4L1</i>    | 0.739±0.239  | 1.386±0.459  | 1.42E-13 |
| cg27592112 | 15 | 27670095  | <i>GABRG3</i>     | 2.949±0.233  | 1.867±0.783  | 1.44E-13 |
| cg07086380 | 5  | 118691033 | <i>TNFAIP8</i>    | 1.025±0.363  | 0.002±0.729  | 1.44E-13 |
| cg05718253 | 19 | 11347359  | <i>DOCK6</i>      | 2.024±0.315  | 2.784±0.531  | 1.45E-13 |
| cg03679581 | 9  | 5304511   | <i>RLN2</i>       | -0.049±0.201 | -0.809±0.55  | 1.46E-13 |
| cg07696033 | 11 | 44326410  | <i>ALX4</i>       | -3.064±0.404 | -1.632±1.034 | 1.50E-13 |
| cg07841014 | 2  | 79314745  | <i>REG1B</i>      | 2.872±0.263  | 1.609±0.916  | 1.51E-13 |
| cg24298280 | 6  | 125305108 | <i>RNF217</i>     | 1.752±0.394  | 0.818±0.652  | 1.51E-13 |
| cg16638540 | 19 | 58570468  | <i>ZNF135</i>     | -1.872±0.73  | -0.341±1.037 | 1.55E-13 |
| cg23854009 | 19 | 58111128  | <i>ZNF530</i>     | -3.107±0.267 | -3.848±0.529 | 1.56E-13 |
| cg14652095 | 6  | 26018185  | <i>HIST1H1A</i>   | -0.056±0.266 | 1.125±0.857  | 1.56E-13 |
| cg05368341 | 1  | 114696465 | <i>SYT6</i>       | -4.263±0.565 | -2.374±1.363 | 1.59E-13 |
| cg03421300 | 1  | 27189787  | <i>SFN</i>        | 2.556±0.536  | 1.195±0.962  | 1.60E-13 |
| cg03835296 | 6  | 25830922  | <i>SLC17A1</i>    | 1.468±0.231  | 0.404±0.772  | 1.61E-13 |
| cg19884262 | 10 | 129535968 | <i>FOXI2</i>      | -3.249±0.819 | -1.262±1.396 | 1.65E-13 |
| cg01446393 | 3  | 58563609  | <i>FAM107A</i>    | -0.084±0.315 | 0.605±0.473  | 1.65E-13 |
| cg20023231 | 16 | 22825282  | <i>HS3ST2</i>     | -3.747±0.46  | -1.874±1.36  | 1.69E-13 |
| cg23752985 | 2  | 85803571  | <i>VAMP8</i>      | 0.856±0.463  | 1.875±0.702  | 1.72E-13 |
| cg16993794 | 22 | 24199328  | <i>SLC2A11</i>    | -3.535±0.491 | -4.407±0.549 | 1.77E-13 |
| cg25057743 | 2  | 209271505 | <i>PTH2R</i>      | -2.405±0.453 | -0.916±1.078 | 1.77E-13 |
| cg10520594 | 17 | 73127197  | <i>NT5C</i>       | -3.58±0.483  | -4.393±0.489 | 1.81E-13 |
| cg23595927 | 4  | 671851    | <i>MYL5</i>       | 1.059±0.469  | -0.168±0.874 | 1.81E-13 |
| cg09784259 | 1  | 169703422 | <i>SELE</i>       | 1.024±0.293  | 1.691±0.464  | 1.82E-13 |
| cg04508649 | 1  | 11249046  | <i>ANGPTL7</i>    | 2.295±0.338  | 2.821±0.287  | 1.87E-13 |
| cg18692273 | 1  | 201347483 | <i>TNNT2</i>      | 3.372±0.378  | 2.073±0.943  | 1.88E-13 |
| cg06498267 | 5  | 45695922  | <i>HCN1</i>       | -1.973±0.515 | -0.723±0.882 | 1.94E-13 |
| cg02755455 | 1  | 65352382  | <i>JAK1</i>       | 1.721±0.247  | 2.132±0.246  | 1.96E-13 |
| cg25500444 | 11 | 86086101  | <i>CCDC81</i>     | -2.431±0.422 | -1.357±0.763 | 1.98E-13 |
| cg20616414 | 9  | 95947396  | <i>WNK2</i>       | -2.443±0.806 | -0.578±1.306 | 1.98E-13 |
| cg15377518 | 2  | 145278113 | <i>ZEB2</i>       | -2.537±0.359 | -1.232±0.95  | 2.02E-13 |
| cg25563456 | 11 | 32456069  | <i>WT1</i>        | -3.875±0.442 | -1.947±1.408 | 2.06E-13 |
| cg10107725 | 2  | 160761556 | <i>LY75-CD302</i> | -0.636±0.255 | -1.632±0.727 | 2.07E-13 |
| cg03297731 | 16 | 30124293  | <i>GDPD3</i>      | 0.325±0.233  | -0.348±0.486 | 2.14E-13 |
| cg02748539 | 5  | 524269    | <i>SLC9A3</i>     | -2.654±0.685 | -0.979±1.187 | 2.15E-13 |
| cg15781838 | 2  | 128422717 | <i>LIMS2</i>      | 1.509±0.336  | 2.367±0.612  | 2.15E-13 |
| cg12417466 | 3  | 35683819  | <i>ARPP21</i>     | 1.994±0.311  | 0.84±0.843   | 2.17E-13 |
| cg13235447 | 9  | 21385440  | <i>IFNA2</i>      | -0.661±0.334 | -1.582±0.663 | 2.19E-13 |
| cg06942110 | 7  | 1545385   | <i>INTS1</i>      | 1.465±0.26   | 0.409±0.773  | 2.20E-13 |
| cg10318258 | 14 | 24809759  | <i>RIPK3</i>      | 1.13±0.32    | 0.078±0.766  | 2.21E-13 |
| cg13139843 | 21 | 31852793  | <i>KRTAP19-1</i>  | 0.601±0.249  | -0.42±0.747  | 2.22E-13 |
| cg07747336 | 11 | 125649398 | <i>PATE2</i>      | 1.14±0.209   | 0.185±0.7    | 2.24E-13 |
| cg03224418 | 20 | 62611858  | <i>PRPF6</i>      | -0.171±0.292 | -1.06±0.646  | 2.34E-13 |

|            |    |           |           |              |              |          |
|------------|----|-----------|-----------|--------------|--------------|----------|
| cg05615150 | 3  | 35683815  | ARPP21    | 1.944±0.38   | 0.568±1.007  | 2.37E-13 |
| cg23509869 | 6  | 31553441  | LST1      | -0.535±0.273 | -1.316±0.565 | 2.38E-13 |
| cg10957151 | 2  | 176986956 | HOXD9     | -2.028±0.25  | -0.729±0.953 | 2.38E-13 |
| cg16742703 | 19 | 51357857  | KLK3      | 0.335±0.278  | -0.393±0.522 | 2.41E-13 |
| cg17074151 | 9  | 139660381 | LCN15     | 0.287±0.222  | -0.514±0.586 | 2.41E-13 |
| cg10920765 | 11 | 5276721   | HBG2      | 1.376±0.299  | 0.333±0.752  | 2.41E-13 |
| cg11965370 | 11 | 131780946 | NTM       | -2.389±0.636 | -0.904±1.047 | 2.42E-13 |
| cg16832407 | 9  | 73736539  | TRPM3     | -2.114±0.366 | -0.888±0.895 | 2.43E-13 |
| cg13791131 | 11 | 2161892   | IGF2-AS   | -2.57±0.638  | -0.874±1.219 | 2.44E-13 |
| cg18623836 | 2  | 10261907  | RRM2      | 0.686±0.295  | -0.242±0.676 | 2.45E-13 |
| cg01839464 | 18 | 49868477  | DCC       | -3.111±0.649 | -1.29±1.317  | 2.46E-13 |
| cg27341860 | 1  | 248099880 | OR2L13    | 2.711±0.334  | 1.525±0.868  | 2.46E-13 |
| cg06126510 | 5  | 22142613  | PMCHL1    | 0.866±0.165  | 0.07±0.584   | 2.47E-13 |
| cg21164303 | 15 | 79603277  | TMED3     | -5.009±0.315 | -5.77±0.541  | 2.55E-13 |
| cg09936839 | 19 | 4181854   | SIRT6     | 1.128±0.356  | 0.195±0.671  | 2.56E-13 |
| cg26615126 | 2  | 3642867   | COLEC11   | 0.428±0.23   | 1.052±0.451  | 2.63E-13 |
| cg06995715 | 16 | 86612590  | FOXL1     | -2.517±0.564 | -0.818±1.237 | 2.63E-13 |
| cg04330449 | 5  | 134871166 | NEUROG1   | -1.986±0.774 | -0.428±1.058 | 2.64E-13 |
| cg08569678 | 8  | 143781397 | LY6K      | -0.187±0.49  | -1.501±0.948 | 2.65E-13 |
| cg06817917 | 10 | 88515527  | BMPR1A    | -3.703±0.238 | -4.126±0.271 | 2.68E-13 |
| cg05927017 | 18 | 60988155  | 0         | -3.474±0.308 | -4.109±0.436 | 2.75E-13 |
| cg12058490 | 12 | 9268379   | A2M       | -0.23±0.388  | 0.713±0.673  | 2.83E-13 |
| cg05064181 | 10 | 116445398 | ABLIM1    | 0.57±0.489   | 1.592±0.704  | 2.85E-13 |
| cg06204948 | 11 | 63656090  | MARK2     | -0.769±0.339 | -1.953±0.87  | 2.85E-13 |
| cg19685066 | 1  | 18082003  | ACTL8     | 2.245±0.308  | 1.205±0.763  | 2.86E-13 |
| cg16632715 | 2  | 176972113 | HOXD11    | -2.016±0.481 | -0.86±0.825  | 2.93E-13 |
| cg04268405 | 10 | 73723221  | CHST3     | 0.933±0.326  | 1.839±0.658  | 2.94E-13 |
| cg24352499 | 12 | 50360776  | 0         | -2.193±0.282 | -2.855±0.47  | 2.94E-13 |
| cg04598121 | 8  | 57358505  | PENK      | -1.788±0.489 | -0.636±0.819 | 2.95E-13 |
| cg25511429 | 6  | 6008125   | NRN1      | -2.434±0.222 | -0.871±1.153 | 2.97E-13 |
| cg23300372 | 5  | 71015432  | CARTPT    | -3.732±0.607 | -1.886±1.352 | 3.18E-13 |
| cg24426405 | 7  | 16844852  | AGR2      | -0.069±0.226 | -1.049±0.725 | 3.22E-13 |
| cg00933411 | 8  | 13373090  | DLC1      | -0.144±0.344 | -1.201±0.776 | 3.30E-13 |
| cg14269477 | 7  | 142630597 | TRPV5     | 1.639±0.197  | 0.833±0.596  | 3.33E-13 |
| cg13678049 | 6  | 43149356  | CUL9      | -0.207±0.209 | 0.518±0.535  | 3.34E-13 |
| cg20530056 | 1  | 206643377 | IKBKE     | 0.198±0.364  | -0.794±0.722 | 3.56E-13 |
| cg07442479 | 5  | 37839769  | GDNF      | -2.05±0.5    | -0.742±0.949 | 3.57E-13 |
| cg15760840 | 7  | 27225222  | HXA11-AS  | -4.126±0.374 | -2.112±1.495 | 3.57E-13 |
| cg20855565 | 1  | 248020350 | TRIM58    | -3.843±0.457 | -1.806±1.512 | 3.70E-13 |
| cg18107827 | 1  | 26488988  | FAM110D   | -1.476±0.402 | -2.264±0.537 | 3.72E-13 |
| cg02028524 | 14 | 92573410  | ATXN3     | 3.122±0.303  | 1.393±1.284  | 3.76E-13 |
| cg11207564 | 17 | 34523735  | CCL3L3    | -1.709±0.284 | -2.535±0.606 | 3.80E-13 |
| cg19635695 | 10 | 95372445  | PDE6C     | 0.853±0.252  | -0.026±0.651 | 3.84E-13 |
| cg11303670 | 7  | 128784442 | TSPAN33   | -3.681±0.263 | -4.238±0.39  | 3.85E-13 |
| cg24244000 | 15 | 27670335  | GABRG3    | 1.874±0.232  | 0.696±0.875  | 3.85E-13 |
| cg04420907 | 17 | 9480215   | WDR16     | -3.013±0.611 | -4.188±0.795 | 3.91E-13 |
| cg03602500 | 19 | 55047721  | KIR3DX1   | 2.414±0.309  | 1.078±0.994  | 3.95E-13 |
| cg20837735 | 18 | 61144177  | SERPINB5  | 2.331±0.701  | 0.69±1.175   | 4.06E-13 |
| cg21529533 | 6  | 29796015  | HLA-G     | -4.191±0.551 | -2.157±1.511 | 4.09E-13 |
| cg06233985 | 11 | 5249528   | HBB       | 1.393±0.271  | 0.553±0.62   | 4.09E-13 |
| cg13283751 | 6  | 28493811  | GPX5      | -2.005±0.264 | -2.865±0.637 | 4.10E-13 |
| cg07752420 | 9  | 21968681  | CDKN2A    | -2.424±0.326 | -1.1±0.986   | 4.20E-13 |
| cg03914397 | 5  | 151784441 | NMUR2     | 1.319±0.263  | 0.247±0.799  | 4.25E-13 |
| cg03943081 | 10 | 133110646 | TCERG1L   | -2.613±0.459 | -1.012±1.189 | 4.26E-13 |
| cg21604042 | 6  | 35181401  | SCUBE3    | -2.559±0.368 | -1.012±1.153 | 4.33E-13 |
| cg08477744 | 1  | 17308032  | MFAP2     | 2.816±0.325  | 1.791±0.759  | 4.34E-13 |
| cg03131527 | 3  | 197301250 | BDH1      | -0.835±0.355 | 0.02±0.617   | 4.40E-13 |
| cg25938646 | 13 | 84456681  | SLITRK1   | -3.305±0.485 | -1.721±1.175 | 4.45E-13 |
| cg27169020 | 15 | 83954229  | BNC1      | -1.397±0.331 | -0.328±0.793 | 4.46E-13 |
| cg25356886 | 2  | 208988967 | CRYGD     | 0.09±0.176   | 0.551±0.337  | 4.46E-13 |
| cg02141570 | 3  | 197808633 | ANKRD18DP | -0.161±0.2   | 0.343±0.366  | 4.51E-13 |
| cg00208830 | 1  | 183154778 | LAMC2     | 1.206±0.302  | 0.255±0.704  | 4.52E-13 |
| cg07260592 | 6  | 161100122 | 0         | -1.128±0.565 | -0.037±0.743 | 4.65E-13 |
| cg13807496 | 11 | 44332540  | ALX4      | -3.117±0.295 | -1.976±0.851 | 4.68E-13 |
| cg22774472 | 2  | 190044636 | COL5A2    | -2.192±0.264 | -0.802±1.039 | 4.78E-13 |
| cg17099569 | 2  | 121549866 | 0         | 0.479±0.34   | -0.544±0.747 | 4.83E-13 |
| cg19118077 | 10 | 5137178   | AKR1C3    | -1.252±0.416 | -2.208±0.686 | 4.84E-13 |

|            |    |           |          |              |              |          |
|------------|----|-----------|----------|--------------|--------------|----------|
| cg09617773 | 6  | 76783708  | IMPG1    | 0.948±0.262  | 0.231±0.527  | 4.89E-13 |
| cg01772980 | 11 | 61957695  | SCGB1D1  | 1.454±0.277  | 0.468±0.736  | 5.00E-13 |
| cg15439078 | 3  | 46904643  | MYL3     | 3.029±0.345  | 2.305±0.509  | 5.01E-13 |
| cg22477971 | 1  | 22984594  | C1QB     | 1.526±0.239  | 0.404±0.841  | 5.14E-13 |
| cg03700462 | 7  | 27135684  | HOTAIRM1 | -4.252±0.374 | -2.013±1.678 | 5.21E-13 |
| cg13255190 | 12 | 4829286   | GALNT8   | 0.651±0.21   | 0.082±0.418  | 5.21E-13 |
| cg01546430 | 5  | 156607836 | ITK      | -0.848±0.258 | -1.727±0.656 | 5.24E-13 |
| cg09516965 | 14 | 52734529  | PTGDR    | -3.581±1.026 | -1.028±1.861 | 5.25E-13 |
| cg11297236 | 16 | 20416475  | PDILT    | 1.298±0.265  | 0.064±0.925  | 5.26E-13 |
| cg02833180 | 2  | 198815064 | PLCL1    | 2.279±0.333  | 0.949±0.997  | 5.32E-13 |
| cg09451092 | 1  | 159869223 | CCDC19   | 2.359±0.307  | 1.546±0.598  | 5.35E-13 |
| cg26244225 | 12 | 12938082  | APOLD1   | 0.286±0.216  | 0.77±0.347   | 5.43E-13 |
| cg18533225 | 22 | 50986813  | KLHDC7B  | -0.02±0.267  | 1.03±0.787   | 5.43E-13 |
| cg10140638 | 2  | 220174207 | PTPRN    | -4.135±0.727 | -2.061±1.535 | 5.46E-13 |
| cg14134005 | 8  | 11563042  | GATA4    | -2.698±0.244 | -1.573±0.844 | 5.47E-13 |
| cg19787037 | 8  | 7321179   | SPAG11B  | 0.308±0.164  | -0.499±0.606 | 5.50E-13 |
| cg11484576 | 11 | 63272554  | LGALS12  | -0.688±0.335 | 0.312±0.742  | 5.50E-13 |
| cg12128017 | 1  | 38230769  | EPHA10   | -3.541±0.651 | -1.965±1.146 | 5.58E-13 |
| cg20723355 | 17 | 6679597   | FBXO39   | -2.284±0.545 | -0.695±1.179 | 5.60E-13 |
| cg20052718 | 7  | 19156902  | TWIST1   | -2.752±0.743 | -1.041±1.234 | 5.66E-13 |
| cg18750960 | 2  | 177016417 | HOXD4    | -2.739±0.525 | -1.074±1.241 | 5.67E-13 |
| cg13553455 | 10 | 105846002 | COL17A1  | 1.376±0.421  | 0.456±0.656  | 5.72E-13 |
| cg05840031 | 11 | 31832353  | PAX6     | -2.395±0.281 | -0.945±1.09  | 5.77E-13 |
| cg10895543 | 9  | 21968832  | CDKN2A   | -2.616±0.411 | -1.213±1.051 | 6.01E-13 |
| cg05127924 | 17 | 18647524  | FBXW10   | 0.271±0.288  | 1.087±0.606  | 6.13E-13 |
| cg10362475 | 11 | 70507825  | SHANK2   | 0±0.32       | 1.029±0.769  | 6.16E-13 |
| cg14611174 | 14 | 60975837  | SIX6     | -3.734±0.542 | -2.021±1.281 | 6.21E-13 |
| cg20008332 | 2  | 5833169   | SOX11    | -3.296±0.824 | -1.363±1.403 | 6.23E-13 |
| cg24861272 | 10 | 31607153  | ZEB1-AS1 | -1.446±0.269 | -2.329±0.662 | 6.32E-13 |
| cg11721194 | 1  | 160709239 | SLAMF7   | 0.529±0.219  | -0.289±0.615 | 6.32E-13 |
| cg13608094 | 11 | 69461236  | CCND1    | 2.908±0.507  | 3.65±0.392   | 6.50E-13 |
| cg02624705 | 18 | 49868678  | DCC      | -3.144±0.668 | -1.407±1.28  | 6.51E-13 |
| cg22183706 | 11 | 14993818  | CALCA    | -2.882±0.446 | -1.573±0.976 | 6.54E-13 |
| cg15337897 | 11 | 69634400  | FGF3     | -3.355±0.639 | -1.698±1.222 | 6.59E-13 |
| cg02620013 | 13 | 49794681  | MLNR     | -1.644±0.455 | -0.408±0.916 | 6.60E-13 |
| cg06384463 | 1  | 91182708  | BARHL2   | -4.379±0.462 | -2.883±1.122 | 6.63E-13 |
| cg00806490 | 16 | 82660873  | CDH13    | -2.302±0.352 | -0.957±1.015 | 6.93E-13 |
| cg00750606 | 1  | 20899121  | 0        | 0.859±0.354  | -0.099±0.711 | 7.07E-13 |
| cg09614401 | 20 | 4229009   | ADRA1D   | 2.117±0.402  | 2.993±0.629  | 7.09E-13 |
| cg19325985 | 2  | 176956761 | HOXD13   | -2.25±0.26   | -1.184±0.805 | 7.10E-13 |
| cg04059863 | 3  | 121741630 | ILDR1    | 1.943±0.41   | 0.695±0.935  | 7.14E-13 |
| cg14467840 | 1  | 153600972 | S100A1   | 2.965±0.29   | 2.171±0.59   | 7.15E-13 |
| cg16715722 | 10 | 102890296 | TLX1NB   | 1.284±0.391  | 1.886±0.351  | 7.17E-13 |
| cg16140179 | 13 | 46275352  | SPERT    | 1.192±0.292  | 0.198±0.748  | 7.24E-13 |
| cg22988566 | 20 | 44334869  | WFDC10B  | 2.211±0.292  | 1.339±0.652  | 7.25E-13 |
| cg15664905 | 19 | 44009429  | PHLDB3   | 0.43±0.254   | 1.064±0.466  | 7.30E-13 |
| cg23400451 | 17 | 10373728  | MYH4     | 1.178±0.258  | 0.268±0.687  | 7.31E-13 |
| cg22918700 | 14 | 24600067  | FITM1    | 1.173±0.311  | 1.8±0.441    | 7.37E-13 |
| cg25094569 | 11 | 32448769  | WT1      | -3.215±0.583 | -1.408±1.357 | 7.47E-13 |
| cg16008138 | 17 | 60885892  | 42439    | 0.415±0.236  | -0.192±0.449 | 7.49E-13 |
| cg08876932 | 11 | 71955547  | PHOX2A   | -3.832±0.64  | -1.932±1.423 | 7.52E-13 |
| cg02284188 | 11 | 89541672  | TRIM49   | 1.816±0.245  | 0.858±0.725  | 7.57E-13 |
| cg20904010 | 22 | 33402393  | SYN3     | 2.465±0.368  | 1.263±0.906  | 7.91E-13 |
| cg10466917 | 7  | 141958449 | PRSS58   | 0.376±0.286  | -0.646±0.773 | 7.93E-13 |
| cg08214029 | 17 | 34391478  | CCL18    | 0.041±0.257  | -0.95±0.751  | 7.94E-13 |
| cg14614211 | 10 | 28034247  | MKX      | -2.606±0.454 | -1.081±1.151 | 7.98E-13 |
| cg14011639 | 5  | 140797234 | PCDHGB7  | -3.838±0.364 | -2.137±1.291 | 7.99E-13 |
| cg24178740 | 2  | 219850465 | FEV      | -1.536±0.24  | -0.743±0.599 | 8.11E-13 |
| cg12989650 | 17 | 8213328   | ARHGEF15 | -0.105±0.262 | 0.478±0.422  | 8.14E-13 |
| cg10723020 | 2  | 208393829 | CREB1    | -3.853±0.231 | -4.326±0.335 | 8.19E-13 |
| cg08535373 | 20 | 37352612  | SLC32A1  | -3.256±0.366 | -1.799±1.105 | 8.30E-13 |
| cg23187653 | 5  | 95769008  | PCSK1    | -4.146±0.452 | -2.649±1.131 | 8.36E-13 |
| cg26756862 | 7  | 143012960 | CLCN1    | 2.431±0.209  | 1.705±0.549  | 8.37E-13 |
| cg14221171 | 7  | 97361759  | TAC1     | -2.331±0.356 | -1.07±0.955  | 8.41E-13 |
| cg21030598 | 3  | 196466425 | PAK2     | -1.124±0.258 | -0.2±0.7     | 8.42E-13 |
| cg13552869 | 16 | 29909924  | SEZ6L2   | -0.817±0.217 | -0.085±0.553 | 8.42E-13 |
| cg10019507 | 20 | 23016315  | SSTR4    | 0.13±0.217   | 0.703±0.426  | 8.43E-13 |

|            |    |           |            |              |              |          |
|------------|----|-----------|------------|--------------|--------------|----------|
| cg18335068 | 19 | 53757910  | ZNF677     | -4.084±0.718 | -1.946±1.608 | 8.60E-13 |
| cg14069619 | 17 | 8275273   | KRBA2      | 0.407±0.329  | 1.014±0.409  | 8.62E-13 |
| cg17711541 | 6  | 26124704  | HIST1H2AC  | -0.802±0.342 | -0.083±0.515 | 8.76E-13 |
| cg21197871 | 8  | 96036803  | NDUFAF6    | -1.208±0.226 | -1.972±0.579 | 8.88E-13 |
| cg13944141 | 0  | 0         | 0          | 0.974±0.305  | -0.091±0.807 | 9.01E-13 |
| cg07027075 | 4  | 39461721  | LIAS       | -1.979±0.352 | -2.724±0.535 | 9.17E-13 |
| cg23571857 | 17 | 6658898   | XAF1       | -0.146±0.251 | 0.472±0.457  | 9.25E-13 |
| cg09229912 | 12 | 111471963 | CUX2       | -3.815±1.251 | -1.229±1.848 | 9.47E-13 |
| cg03963198 | 5  | 1882871   | IRX4       | -2.543±0.732 | -0.787±1.295 | 9.56E-13 |
| cg20498685 | 7  | 19156086  | TWIST1     | -3.789±0.372 | -1.715±1.584 | 9.71E-13 |
| cg06639544 | 19 | 14940319  | OR7A5      | 1.087±0.282  | 0.257±0.626  | 9.75E-13 |
| cg25574024 | 11 | 2161894   | IGF2-AS    | -2.583±0.897 | -0.642±1.405 | 9.87E-13 |
| cg13179915 | 11 | 65362949  | KCNK7      | 2.498±0.231  | 1.712±0.597  | 1.00E-12 |
| cg01882150 | 11 | 63933998  | MACROD1    | -3.553±0.433 | -4.206±0.375 | 1.00E-12 |
| cg27504991 | 6  | 43022209  | CUL7       | 1.459±0.362  | 2.639±0.895  | 1.01E-12 |
| cg03716937 | 8  | 39695862  | ADAM2      | 2.579±0.222  | 1.855±0.55   | 1.03E-12 |
| cg08785215 | 3  | 57993979  | FLNB       | -4.05±0.391  | -4.813±0.537 | 1.04E-12 |
| cg09872616 | 7  | 130126182 | MEST       | -0.665±0.221 | -1.64±0.745  | 1.05E-12 |
| cg13246269 | 9  | 33403037  | AQP7       | 0.414±0.135  | 0.03±0.289   | 1.06E-12 |
| cg14552982 | 9  | 133568226 | EXOSC2     | -0.119±0.262 | 0.496±0.454  | 1.08E-12 |
| cg26050734 | 1  | 151689032 | CELF3      | -1.028±0.237 | -0.24±0.6    | 1.10E-12 |
| cg12200412 | 1  | 158324331 | CD1E       | -0.139±0.211 | -1.041±0.69  | 1.10E-12 |
| cg23641264 | 8  | 143748641 | JRK        | 1.705±0.306  | 2.387±0.498  | 1.12E-12 |
| cg06392096 | 19 | 54824275  | LILRA5     | -0.64±0.168  | -1.219±0.442 | 1.14E-12 |
| cg15645309 | 14 | 75988747  | BATF       | -1.062±0.394 | -2.025±0.716 | 1.15E-12 |
| cg02255732 | 11 | 31150189  | 0          | 0.857±0.285  | -0.139±0.761 | 1.16E-12 |
| cg13853761 | 11 | 64863232  | VPS51      | 1.723±0.374  | 2.719±0.748  | 1.17E-12 |
| cg22496652 | 9  | 92094625  | SEMA4D     | 1.036±0.161  | 0.721±0.223  | 1.20E-12 |
| cg20015689 | 20 | 43835190  | SEMG1      | -0.321±0.211 | -1.185±0.663 | 1.21E-12 |
| cg11122968 | 19 | 51727295  | CD33       | 0.573±0.229  | -0.24±0.622  | 1.21E-12 |
| cg00399483 | 18 | 49868378  | DCC        | -2.228±0.434 | -1.039±0.897 | 1.21E-12 |
| cg06640279 | 1  | 207095153 | FAIM3      | -0.892±0.373 | -1.908±0.767 | 1.22E-12 |
| cg07785936 | 2  | 133174635 | GPR39      | 0.996±0.273  | 0.211±0.595  | 1.23E-12 |
| cg03733371 | 3  | 185270528 | LIPH       | -0.823±0.342 | -1.794±0.735 | 1.23E-12 |
| cg24879335 | 3  | 133465180 | TF         | -2.785±0.458 | -1.312±1.124 | 1.24E-12 |
| cg07730329 | 5  | 140810137 | PCDHGA12   | -2.373±0.306 | -1.069±1.001 | 1.24E-12 |
| cg23580945 | 17 | 37186341  | LRRC37A11P | 2.257±0.316  | 1.167±0.833  | 1.24E-12 |
| cg16831889 | 15 | 50558051  | HDC        | -0.566±0.403 | 0.47±0.778   | 1.26E-12 |
| cg02812142 | 2  | 135595323 | ACMSD      | 1.29±0.238   | 0.332±0.736  | 1.27E-12 |
| cg04574507 | 1  | 158301038 | CD1B       | 1.704±0.257  | 0.476±0.945  | 1.28E-12 |
| cg25082710 | 1  | 152880108 | IVL        | -0.388±0.266 | -1.364±0.749 | 1.29E-12 |
| cg17945001 | 1  | 18434118  | IGSF21     | -2.243±0.494 | -1.125±0.825 | 1.31E-12 |
| cg01348086 | 5  | 176785296 | RGS14      | 0.263±0.314  | -0.704±0.738 | 1.32E-12 |
| cg05788638 | 14 | 94759020  | SERPINA10  | 2.248±0.225  | 1.255±0.764  | 1.32E-12 |
| cg15127324 | 4  | 36246442  | ARAP2      | -3.271±0.241 | -3.711±0.305 | 1.34E-12 |
| cg11368643 | 5  | 140625059 | PCDHB15    | -1.78±0.363  | -0.528±0.96  | 1.34E-12 |
| cg14415034 | 3  | 45730717  | SACM1L     | -3.38±0.388  | -2.72±0.437  | 1.34E-12 |
| cg15113803 | 3  | 129247119 | RHO        | 2.605±0.347  | 1.909±0.498  | 1.34E-12 |
| cg22709192 | 12 | 54366909  | HOXC11     | -1.907±0.441 | -0.336±1.206 | 1.35E-12 |
| cg20312687 | 20 | 29956585  | DEFB118    | 1.271±0.285  | 0.036±0.951  | 1.35E-12 |
| cg19435264 | 5  | 149569537 | SLC6A7     | -3.681±0.466 | -2.26±1.084  | 1.36E-12 |
| cg08742106 | 17 | 5031982   | USP6       | 2.725±0.295  | 1.881±0.641  | 1.37E-12 |
| cg05244766 | 11 | 67350499  | GSTP1      | 1.957±0.334  | 0.719±0.952  | 1.39E-12 |
| cg23430664 | 17 | 48423021  | XYLT2      | -2.933±0.31  | -3.651±0.533 | 1.40E-12 |
| cg19885761 | 5  | 175223646 | CPLX2      | -2.219±0.512 | -0.598±1.24  | 1.41E-12 |
| cg14757492 | 19 | 19029194  | COPE       | 1.482±0.228  | 0.449±0.798  | 1.44E-12 |
| cg14116122 | 12 | 85673884  | ALX1       | -4.608±0.516 | -2.777±1.408 | 1.45E-12 |
| cg00037763 | 18 | 42281763  | SETBP1     | 3.074±0.277  | 1.735±1.035  | 1.46E-12 |
| cg13224710 | 18 | 3411743   | TGIF1      | 2.088±0.186  | 1.381±0.545  | 1.47E-12 |
| cg02257405 | 5  | 131346985 | ACSL6      | -1.349±0.257 | -0.522±0.634 | 1.47E-12 |
| cg03312532 | 15 | 90166033  | TICRR      | 0.891±0.31   | 1.578±0.506  | 1.47E-12 |
| cg25856811 | 1  | 152973957 | SPRR3      | 0.487±0.296  | -0.572±0.815 | 1.47E-12 |
| cg10246520 | 13 | 53601944  | OLFM4      | 3.932±0.361  | 2.557±1.061  | 1.51E-12 |
| cg16842214 | 3  | 42727160  | KLHL40     | -0.488±0.331 | 0.226±0.523  | 1.52E-12 |
| cg15700197 | 1  | 159409207 | OR10J1     | 0.541±0.267  | -0.616±0.894 | 1.52E-12 |
| cg09340639 | 1  | 157789662 | FCRL1      | -1.464±0.371 | -2.445±0.743 | 1.52E-12 |
| cg16543027 | 15 | 40599680  | PLCB2      | 0.075±0.275  | -0.794±0.666 | 1.55E-12 |

|            |    |           |           |              |              |          |
|------------|----|-----------|-----------|--------------|--------------|----------|
| cg20050826 | 12 | 52995295  | KRT72     | -1.618±0.362 | -0.465±0.886 | 1.55E-12 |
| cg24930915 | 16 | 2199120   | RAB26     | -2.326±0.266 | -2.738±0.252 | 1.56E-12 |
| cg15573237 | 1  | 104159187 | AMY2A     | 0.811±0.119  | 0.5±0.236    | 1.57E-12 |
| cg19537511 | 17 | 8213813   | ARHGEF15  | -0.757±0.314 | 0.123±0.671  | 1.57E-12 |
| cg22680204 | 4  | 5895098   | CRMP1     | -2.876±0.441 | -1.407±1.13  | 1.57E-12 |
| cg10186456 | 16 | 2892912   | PRSS30P   | 0.252±0.291  | 1.153±0.692  | 1.60E-12 |
| cg23563234 | 5  | 140797286 | PCDHGB7   | -2.604±0.292 | -1.08±1.181  | 1.61E-12 |
| cg05767404 | 1  | 247712591 | GCSAML    | 0.473±0.325  | -0.935±1.091 | 1.66E-12 |
| cg01479232 | 20 | 748992    | SLC52A3   | 0.318±0.31   | -0.408±0.544 | 1.69E-12 |
| cg00392257 | 1  | 156696747 | ISG20L2   | 0.532±0.287  | -0.358±0.684 | 1.70E-12 |
| cg20542190 | 19 | 54850619  | LILRA4    | -0.5±0.273   | -1.324±0.632 | 1.71E-12 |
| cg04757243 | 3  | 133648823 | C3orf36   | 2.635±0.228  | 2.001±0.484  | 1.71E-12 |
| cg12348970 | 9  | 19786543  | SLC24A2   | 3.215±0.346  | 1.683±1.188  | 1.72E-12 |
| cg14294758 | 3  | 116163694 | LSAMP     | -3.06±0.404  | -1.719±1.035 | 1.73E-12 |
| cg25989745 | 9  | 12693326  | TYRP1     | 1.695±0.271  | 0.898±0.611  | 1.74E-12 |
| cg23410113 | 2  | 202149083 | CASP8     | 2.036±0.248  | 1.516±0.381  | 1.74E-12 |
| cg20802392 | 1  | 150780684 | CTSK      | 0.526±0.284  | 1.295±0.586  | 1.75E-12 |
| cg23732024 | 8  | 74903801  | LY96      | -0.42±0.534  | -1.881±1.115 | 1.75E-12 |
| cg07947016 | 19 | 51375893  | KLK2      | 0.475±0.306  | -0.571±0.808 | 1.75E-12 |
| cg11812218 | 3  | 172166920 | GHSR      | -2.934±0.506 | -1.439±1.147 | 1.76E-12 |
| cg02936740 | 4  | 68995995  | TMPRSS11F | 1.288±0.232  | 0.458±0.643  | 1.79E-12 |
| cg14920334 | 12 | 4829827   | GALNT8    | -0.084±0.273 | -0.932±0.654 | 1.80E-12 |
| cg17181653 | 6  | 144417537 | SF3B5     | 0.79±0.301   | -0.144±0.721 | 1.89E-12 |
| cg13912117 | 8  | 132054555 | 0         | -3.205±0.849 | -1.086±1.605 | 1.90E-12 |
| cg04048249 | 11 | 116700556 | APOC3     | 1.078±0.235  | 0.33±0.577   | 1.90E-12 |
| cg23111544 | 2  | 79347474  | REG1A     | 1.607±0.353  | 0.638±0.741  | 1.90E-12 |
| cg23326689 | 8  | 80523461  | STMN2     | -1.888±0.291 | -0.653±0.961 | 1.91E-12 |
| cg07441143 | 8  | 143824001 | SLURP1    | 0.922±0.208  | 0.266±0.507  | 1.91E-12 |
| cg24924779 | 20 | 49639998  | KCNG1     | -3.495±0.669 | -1.582±1.468 | 1.91E-12 |
| cg07307078 | 18 | 12307630  | TUBB6     | -3.411±0.451 | -1.184±1.735 | 1.95E-12 |
| cg11258532 | 16 | 66877873  | CA7       | 2.474±0.211  | 1.791±0.528  | 1.96E-12 |
| cg07897701 | 7  | 150549370 | AOC1      | 0.948±0.278  | -0.026±0.756 | 1.98E-12 |
| cg20523861 | 13 | 70682324  | KLHL1     | -1.61±0.38   | -0.608±0.765 | 1.98E-12 |
| cg04622802 | 11 | 27015872  | FIBIN     | -1.618±0.579 | -0.391±0.905 | 2.02E-12 |
| cg12910797 | 17 | 46651722  | HOXB3     | -0.366±0.45  | 1.111±1.144  | 2.04E-12 |
| cg15046693 | 19 | 33863876  | CEBPG     | 0.478±0.399  | -0.593±0.819 | 2.06E-12 |
| cg16158220 | 2  | 79383891  | 0         | 1.929±0.242  | 0.901±0.802  | 2.07E-12 |
| cg18462653 | 20 | 29978176  | DEFB119   | 0.86±0.297   | -0.277±0.885 | 2.08E-12 |
| cg01830294 | 7  | 116963492 | WNT2      | -1.26±0.406  | -0.194±0.814 | 2.09E-12 |
| cg08025786 | 15 | 74899328  | CLK3      | 2.638±0.241  | 2.153±0.353  | 2.10E-12 |
| cg04415689 | 2  | 242128250 | ANO7      | 2.384±0.276  | 1.614±0.591  | 2.11E-12 |
| cg18152830 | 17 | 16875129  | TNFRSF13B | 2.641±0.399  | 1.812±0.609  | 2.11E-12 |
| cg17740305 | 1  | 89738358  | GBP5      | 1.673±0.233  | 1.281±0.263  | 2.12E-12 |
| cg27444994 | 16 | 62070072  | CDH8      | -3.922±0.617 | -2.331±1.214 | 2.12E-12 |
| cg26134665 | 16 | 31021544  | STX1B     | 0.416±0.155  | 0.944±0.41   | 2.13E-12 |
| cg02501779 | 20 | 54579355  | CBLN4     | -3.726±0.578 | -2.218±1.151 | 2.13E-12 |
| cg00882451 | 16 | 21222863  | ZP2       | 2.169±0.311  | 2.715±0.376  | 2.16E-12 |
| cg15839448 | 8  | 41166530  | SFRP1     | -3.287±0.795 | -1.572±1.272 | 2.16E-12 |
| cg23519022 | 1  | 19746204  | CAPZB     | 1.638±0.268  | 2.078±0.289  | 2.17E-12 |
| cg19404979 | 19 | 48498031  | ELSPBP1   | 0.169±0.273  | -0.662±0.643 | 2.18E-12 |
| cg05440289 | 1  | 152881119 | IVL       | 2.289±0.299  | 0.806±1.16   | 2.19E-12 |
| cg25545088 | 6  | 43398446  | ABCC10    | 0.316±0.236  | 0.804±0.358  | 2.19E-12 |
| cg13641903 | 11 | 32452608  | WT1       | 0.006±0.318  | 0.727±0.54   | 2.20E-12 |
| cg23642747 | 10 | 105036645 | INA       | -3.31±0.256  | -1.711±1.251 | 2.21E-12 |
| cg23114594 | 10 | 13544648  | BEND7     | 1.074±0.33   | 1.959±0.679  | 2.21E-12 |
| cg13663218 | 12 | 72666976  | TRHDE-AS1 | -2.128±0.603 | -0.711±1.069 | 2.22E-12 |
| cg17029168 | 20 | 21494547  | NKX2-2    | -2.825±0.392 | -1.335±1.162 | 2.22E-12 |
| cg14153740 | 7  | 141957702 | PRSS58    | 1.911±0.251  | 0.643±0.992  | 2.22E-12 |
| cg18822544 | 21 | 31692465  | KRTAP26-1 | 0.796±0.29   | -0.175±0.756 | 2.25E-12 |
| cg08634024 | 7  | 143657177 | OR2F1     | 2.896±0.337  | 1.455±1.127  | 2.25E-12 |
| cg20832020 | 3  | 114012912 | TIGIT     | 1.2±0.235    | 0.236±0.753  | 2.27E-12 |
| cg04138756 | 1  | 152973849 | SPRR3     | 1.497±0.213  | 0.638±0.671  | 2.29E-12 |
| cg10189695 | 4  | 8582300   | GPR78     | -2.624±0.63  | -1.133±1.128 | 2.33E-12 |
| cg24867501 | 22 | 50925337  | MIOX      | 1.137±0.297  | 0.417±0.547  | 2.38E-12 |
| cg00902195 | 12 | 33592500  | SYT10     | -3.203±0.729 | -1.43±1.348  | 2.38E-12 |
| cg04609859 | 17 | 46655736  | HOXB4     | -4.537±0.683 | -2.574±1.517 | 2.39E-12 |
| cg10399228 | 11 | 36590244  | RAG1      | 0.866±0.257  | 0.039±0.643  | 2.41E-12 |

|            |    |           |                    |              |              |          |
|------------|----|-----------|--------------------|--------------|--------------|----------|
| cg26991199 | 1  | 24307153  | <i>SRSF10</i>      | -3.218±0.361 | -3.946±0.532 | 2.41E-12 |
| cg19238840 | 16 | 20339175  | <i>GP2</i>         | -0.632±0.278 | -1.451±0.635 | 2.46E-12 |
| cg14826683 | 1  | 153013830 | <i>SPRR2D</i>      | 0.855±0.301  | -0.269±0.879 | 2.48E-12 |
| cg04267184 | 20 | 3023418   | <i>GNRH2</i>       | 1.157±0.294  | 1.809±0.489  | 2.50E-12 |
| cg23581186 | 21 | 32119309  | <i>KRTAP21-2</i>   | 0.767±0.348  | 0.029±0.548  | 2.53E-12 |
| cg09868882 | 7  | 126883640 | <i>GRM8</i>        | 1.378±0.21   | 0.233±0.9    | 2.55E-12 |
| cg18267374 | 8  | 24771273  | <i>NEFM</i>        | -3.072±0.5   | -1.442±1.272 | 2.61E-12 |
| cg26489108 | 9  | 975856    | <i>DMRT3</i>       | -2.264±0.2   | -1.268±0.783 | 2.64E-12 |
| cg03102516 | 2  | 97171383  | <i>NEURL3</i>      | 1.117±0.3    | 0.378±0.564  | 2.64E-12 |
| cg14757296 | 3  | 50349918  | <i>HYAL1</i>       | 2.576±0.256  | 2.031±0.406  | 2.65E-12 |
| cg20357628 | 20 | 58179847  | <i>PHACTR3</i>     | -3.012±0.41  | -1.411±1.257 | 2.71E-12 |
| cg03952109 | 5  | 93409932  | <i>FAM172A</i>     | 0.46±0.306   | 0.949±0.314  | 2.71E-12 |
| cg19025034 | 19 | 49198900  | <i>FUT2</i>        | 2.512±0.229  | 1.488±0.806  | 2.81E-12 |
| cg21581873 | 1  | 204329307 | <i>PLEKHA6</i>     | -2.977±0.345 | -1.59±1.091  | 2.81E-12 |
| cg16009558 | 6  | 101846707 | <i>GRIK2</i>       | -3.35±0.474  | -1.836±1.184 | 2.87E-12 |
| cg01868128 | 1  | 152483675 | <i>LCE5A</i>       | 0.542±0.194  | -0.269±0.639 | 2.90E-12 |
| cg03872376 | 1  | 238053828 | <i>ZP4</i>         | 1.151±0.357  | 0.019±0.886  | 2.98E-12 |
| cg23663653 | 14 | 106209207 | <i>0</i>           | 1.904±0.213  | 1.181±0.567  | 3.01E-12 |
| cg07915343 | 11 | 18477680  | <i>LDHAL6A</i>     | 0.567±0.452  | 1.301±0.487  | 3.02E-12 |
| cg09551147 | 10 | 106399957 | <i>SORCS3</i>      | -4.314±0.643 | -2.293±1.581 | 3.04E-12 |
| cg18546622 | 11 | 44325029  | <i>ALX4</i>        | -2.569±0.394 | -1.188±1.086 | 3.10E-12 |
| cg12073594 | 20 | 61903495  | <i>ARFGAP1</i>     | -1.926±0.171 | -2.454±0.413 | 3.11E-12 |
| cg08460026 | 2  | 204732474 | <i>CTLA4</i>       | 1.458±0.42   | 0.228±0.96   | 3.12E-12 |
| cg03923934 | 11 | 133402230 | <i>OPCML</i>       | -3.244±0.366 | -1.94±1.026  | 3.13E-12 |
| cg13521229 | 19 | 51013630  | <i>JOSD2</i>       | 0.521±0.287  | 1.488±0.759  | 3.14E-12 |
| cg01871963 | 9  | 130910995 | <i>LCN2</i>        | 2.826±0.292  | 2.105±0.554  | 3.15E-12 |
| cg21044104 | 3  | 42451876  | <i>LYZL4</i>       | 1.502±0.259  | 0.585±0.722  | 3.16E-12 |
| cg22418909 | 8  | 41166738  | <i>SFRP1</i>       | -2.147±0.782 | -0.63±1.107  | 3.20E-12 |
| cg21301440 | 17 | 74534550  | <i>CYGB</i>        | -1.531±0.235 | -0.513±0.804 | 3.20E-12 |
| cg19574488 | 3  | 61236547  | <i>FHIT</i>        | -2.39±0.322  | -2.968±0.409 | 3.22E-12 |
| cg21312148 | 1  | 152636074 | <i>LCE2D</i>       | 1.506±0.265  | 0.385±0.886  | 3.23E-12 |
| cg22411207 | 8  | 57026301  | <i>MOS</i>         | -3.378±0.299 | -2.077±1.029 | 3.29E-12 |
| cg23357981 | 18 | 56887785  | <i>GRP</i>         | -3.095±0.415 | -1.902±0.931 | 3.32E-12 |
| cg15543551 | 3  | 192445202 | <i>FGF12</i>       | -2.4±0.625   | -1.072±0.995 | 3.33E-12 |
| cg08977371 | 16 | 82660490  | <i>CDH13</i>       | -2.49±0.333  | -1.37±0.882  | 3.38E-12 |
| cg23834593 | 20 | 42983920  | <i>HNF4A</i>       | 1.564±0.309  | 0.567±0.783  | 3.41E-12 |
| cg11004890 | 20 | 3218500   | <i>SLC4A11</i>     | -1.392±0.35  | -0.153±0.977 | 3.42E-12 |
| cg26465611 | 5  | 126626719 | <i>MEGF10</i>      | -1.883±0.357 | -0.716±0.918 | 3.44E-12 |
| cg18420965 | 4  | 66535145  | <i>EPHA5</i>       | -2.434±0.47  | -0.994±1.13  | 3.45E-12 |
| cg26548883 | 17 | 34329899  | <i>CCL15-CCL14</i> | 0.969±0.425  | -0.049±0.781 | 3.49E-12 |
| cg24520070 | 14 | 94462337  | <i>LINC00521</i>   | 0.654±0.27   | 1.409±0.589  | 3.49E-12 |
| cg25949363 | 17 | 48352008  | <i>TMEM92</i>      | -1.608±0.316 | -2.42±0.629  | 3.54E-12 |
| cg00970325 | 3  | 142683176 | <i>PAQR9</i>       | -3.495±0.383 | -1.916±1.251 | 3.56E-12 |
| cg02331561 | 16 | 2391081   | <i>ABCA17P</i>     | -3.622±0.506 | -4.704±0.814 | 3.61E-12 |
| cg11532513 | 3  | 54962242  | <i>LRTM1</i>       | 1.513±0.422  | 2.341±0.609  | 3.63E-12 |
| cg01962826 | 6  | 34100967  | <i>GRM4</i>        | 3.412±0.223  | 1.883±1.214  | 3.63E-12 |
| cg14940420 | 3  | 51895692  | <i>IQCF2</i>       | 1.409±0.234  | 0.431±0.775  | 3.63E-12 |
| cg01248426 | 8  | 87111155  | <i>ATP6V0D2</i>    | 0.594±0.337  | -0.392±0.772 | 3.63E-12 |
| cg13279585 | 2  | 89630389  | <i>0</i>           | 0.482±0.258  | -0.274±0.593 | 3.72E-12 |
| cg02946850 | 7  | 126882944 | <i>GRM8</i>        | 1.288±0.287  | 0.265±0.809  | 3.74E-12 |
| cg03264414 | 9  | 138453697 | <i>PAEP</i>        | 1.975±0.311  | 1.064±0.714  | 3.75E-12 |
| cg02706575 | 17 | 32683054  | <i>CCL13</i>       | 1.545±0.242  | 0.612±0.74   | 3.77E-12 |
| cg11657808 | 1  | 237205950 | <i>RYR2</i>        | -3.715±0.726 | -1.308±1.9   | 3.78E-12 |
| cg10088985 | 4  | 74864313  | <i>CXCL5</i>       | -3.818±0.687 | -1.708±1.66  | 3.78E-12 |
| cg06710648 | 1  | 58716377  | <i>DAB1</i>        | -1.409±0.412 | -0.283±0.879 | 3.80E-12 |
| cg07456201 | 16 | 20363711  | <i>UMOD</i>        | 1.476±0.264  | 0.567±0.719  | 3.80E-12 |
| cg02915544 | 11 | 89392829  | <i>FOLH1B</i>      | 0.962±0.371  | -0.022±0.766 | 3.80E-12 |
| cg21045388 | 1  | 15428172  | <i>KAZN</i>        | 3.365±0.317  | 2.419±0.743  | 3.80E-12 |
| cg03565081 | 14 | 23478970  | <i>C14orf93</i>    | -0.215±0.286 | -1.25±0.82   | 3.83E-12 |
| cg02836529 | 2  | 182544413 | <i>NEUROD1</i>     | -3.323±0.349 | -2.035±1.02  | 3.84E-12 |
| cg01668383 | 13 | 37679573  | <i>CSNK1A1L</i>    | 1.174±0.231  | 0.316±0.68   | 3.85E-12 |
| cg04123507 | 12 | 52695270  | <i>KRT86</i>       | 0.49±0.366   | 1.645±0.911  | 3.95E-12 |
| cg25935911 | 9  | 122132261 | <i>DBC1</i>        | -1.908±0.376 | -0.787±0.882 | 3.99E-12 |
| cg26701826 | 4  | 108814604 | <i>SGMS2</i>       | -0.642±0.36  | 0.413±0.83   | 4.07E-12 |
| cg23092086 | 16 | 55909573  | <i>CES5A</i>       | 2.047±0.231  | 1.043±0.799  | 4.07E-12 |
| cg07109801 | 3  | 49057661  | <i>MIR425</i>      | 0.435±0.233  | -0.389±0.653 | 4.07E-12 |
| cg23242898 | 18 | 49867273  | <i>DCC</i>         | -3.083±0.464 | -1.7±1.089   | 4.08E-12 |

|            |    |           |                     |              |              |          |
|------------|----|-----------|---------------------|--------------|--------------|----------|
| cg05810550 | 8  | 7343451   | <i>DEFB106B</i>     | 1.725±0.234  | 0.837±0.706  | 4.15E-12 |
| cg18873386 | 7  | 96651915  | <i>DLX5</i>         | -1.279±0.223 | -0.463±0.649 | 4.18E-12 |
| cg08675585 | 14 | 77292733  | <i>C14orf166B</i>   | 1.353±0.34   | 0.591±0.581  | 4.22E-12 |
| cg10298815 | 1  | 101004474 | <i>GPR88</i>        | -3.848±0.42  | -2.054±1.429 | 4.28E-12 |
| cg13804316 | 1  | 28286884  | <i>XKR8</i>         | -3.291±0.29  | -3.808±0.368 | 4.30E-12 |
| cg04576021 | 6  | 32784255  | <i>HLA-DOB</i>      | 2.157±0.41   | 1.205±0.732  | 4.32E-12 |
| cg02254407 | 11 | 73357159  | <i>PLEKHB1</i>      | 0.676±0.325  | 1.668±0.783  | 4.39E-12 |
| cg13903548 | 6  | 90024543  | <i>GABRR2</i>       | 1.696±0.209  | 2.153±0.348  | 4.44E-12 |
| cg17966192 | 2  | 108994116 | <i>SULT1C4</i>      | -2.391±0.385 | -1.404±0.77  | 4.44E-12 |
| cg10414946 | 11 | 59856358  | <i>MS4A2</i>        | 0.619±0.276  | -0.283±0.716 | 4.45E-12 |
| cg21349901 | 7  | 4630518   | <i>0</i>            | 2.003±0.16   | 1.481±0.414  | 4.48E-12 |
| cg25383242 | 16 | 76343663  | <i>CNTNAP4</i>      | 2.351±0.227  | 1.497±0.68   | 4.57E-12 |
| cg12087643 | 10 | 118033370 | <i>GFRA1</i>        | -3.014±0.357 | -1.701±1.046 | 4.62E-12 |
| cg02613386 | 17 | 6679533   | <i>FBXO39</i>       | -1.723±0.432 | -0.51±0.954  | 4.63E-12 |
| cg21331821 | 19 | 58545149  | <i>ZSCAN1</i>       | -3.749±0.846 | -1.68±1.607  | 4.69E-12 |
| cg24997562 | 12 | 121476720 | <i>OASL</i>         | -2.711±0.356 | -3.32±0.426  | 4.70E-12 |
| cg14062083 | 21 | 31802829  | <i>KRTAP13-4</i>    | 1.772±0.223  | 0.775±0.798  | 4.80E-12 |
| cg16855929 | 1  | 231561414 | <i>EGLN1</i>        | 0.156±0.369  | 0.954±0.609  | 4.83E-12 |
| cg08786003 | 1  | 157670710 | <i>FCRL3</i>        | 0.934±0.329  | -0.207±0.908 | 4.89E-12 |
| cg09440243 | 9  | 9019757   | <i>PTPRD</i>        | 2.278±0.255  | 1.053±0.982  | 4.98E-12 |
| cg05472874 | 22 | 44258179  | <i>SULT4A1</i>      | -3.305±0.758 | -1.556±1.35  | 5.03E-12 |
| cg07773116 | 10 | 48438500  | <i>GDF10</i>        | -2.756±0.498 | -1.371±1.091 | 5.04E-12 |
| cg10331779 | 5  | 11904811  | <i>CTNND2</i>       | -2.361±0.306 | -1.124±0.99  | 5.15E-12 |
| cg09601629 | 19 | 15122224  | <i>CCDC105</i>      | -2.792±0.491 | -1.748±0.794 | 5.18E-12 |
| cg05824215 | 6  | 167536046 | <i>CCR6</i>         | 1.397±0.347  | 0.517±0.688  | 5.21E-12 |
| cg15749858 | 7  | 20256996  | <i>MACC1</i>        | -1.662±0.336 | -2.29±0.46   | 5.32E-12 |
| cg07017374 | 13 | 28674451  | <i>FLT3</i>         | -3.981±0.415 | -1.463±2.023 | 5.45E-12 |
| cg18931815 | 1  | 36565772  | <i>COL8A2</i>       | 0.396±0.443  | -0.646±0.808 | 5.49E-12 |
| cg20622019 | 20 | 43279793  | <i>ADA</i>          | 0.963±0.491  | -0.298±0.989 | 5.53E-12 |
| cg07903918 | 9  | 101471986 | <i>GABBR2</i>       | -3.193±0.446 | -1.672±1.215 | 5.58E-12 |
| cg19554294 | 19 | 53761868  | <i>VN1R2</i>        | 1.199±0.286  | 0.321±0.699  | 5.58E-12 |
| cg11438428 | 10 | 23481594  | <i>PTF1A</i>        | -2.289±0.647 | -0.772±1.178 | 5.68E-12 |
| cg00546491 | 7  | 32111062  | <i>PDE1C</i>        | -1.19±0.292  | -0.457±0.575 | 5.70E-12 |
| cg07824742 | 9  | 136501784 | <i>DBH</i>          | 5.932±0.456  | 3.961±1.585  | 5.73E-12 |
| cg16608652 | 1  | 193155390 | <i>B3GALT2</i>      | -1.256±0.446 | 0.068±1.052  | 5.74E-12 |
| cg08539991 | 19 | 36203832  | <i>ZBTB32</i>       | 1.81±0.467   | 0.806±0.768  | 5.78E-12 |
| cg15873301 | 3  | 12045459  | <i>SYN2</i>         | -3.679±0.754 | -1.629±1.62  | 5.83E-12 |
| cg26312150 | 7  | 19156550  | <i>TWIST1</i>       | -2.975±0.349 | -1.306±1.344 | 5.84E-12 |
| cg06621358 | 3  | 48699637  | <i>CELSR3</i>       | -1.865±0.291 | -0.731±0.91  | 5.90E-12 |
| cg16612562 | 22 | 29712045  | <i>RASL10A</i>      | 0.792±0.275  | 1.585±0.63   | 5.95E-12 |
| cg27089714 | 8  | 126097158 | <i>KIAA0196</i>     | 0.046±0.331  | 0.837±0.616  | 5.96E-12 |
| cg18693704 | 16 | 66731313  | <i>CMTM4</i>        | -2.132±0.274 | -3.013±0.704 | 5.97E-12 |
| cg14972143 | 4  | 99851003  | <i>EIF4E</i>        | -1.636±0.605 | -2.693±0.756 | 6.02E-12 |
| cg16205058 | 14 | 20924369  | <i>APEX1</i>        | -2.057±0.328 | -2.688±0.469 | 6.03E-12 |
| cg23988567 | 14 | 106237542 | <i>0</i>            | 1.845±0.192  | 1.105±0.595  | 6.15E-12 |
| cg25406518 | 11 | 61102165  | <i>DDB1</i>         | 1.183±0.339  | 0.203±0.78   | 6.18E-12 |
| cg19297688 | 9  | 5231360   | <i>INSL4</i>        | 2.596±0.405  | 1.329±1.012  | 6.25E-12 |
| cg26989103 | 8  | 110099582 | <i>TRHR</i>         | 0.581±0.322  | -0.423±0.803 | 6.39E-12 |
| cg05436231 | 1  | 27709789  | <i>CD164L2</i>      | -0.118±0.26  | -1.144±0.826 | 6.40E-12 |
| cg08331313 | 5  | 151066460 | <i>SPARC</i>        | -4.813±0.651 | -3.035±1.409 | 6.42E-12 |
| cg04868764 | 15 | 41137019  | <i>SPINT1</i>       | -3.4±0.385   | -4.044±0.45  | 6.42E-12 |
| cg21930712 | 19 | 51761116  | <i>SIGLECL1</i>     | 0.9±0.261    | -0.082±0.79  | 6.42E-12 |
| cg16470760 | 12 | 6898217   | <i>CD4</i>          | 1.63±0.347   | 0.777±0.669  | 6.42E-12 |
| cg13397379 | 1  | 247696628 | <i>OR2C3</i>        | 1.714±0.276  | 0.482±0.994  | 6.44E-12 |
| cg05661838 | 8  | 57026568  | <i>MOS</i>          | -3.502±0.414 | -2.245±1.004 | 6.44E-12 |
| cg04721098 | 16 | 24265703  | <i>CACNG3</i>       | 0.935±0.294  | -0.038±0.78  | 6.48E-12 |
| cg24621042 | 14 | 94857275  | <i>SERPINA1</i>     | -0.103±0.19  | -0.741±0.512 | 6.50E-12 |
| cg02421543 | 1  | 93810826  | <i>LOC100131564</i> | -3.103±0.408 | -3.715±0.393 | 6.80E-12 |
| cg07072643 | 19 | 14785593  | <i>EMR3</i>         | 0.39±0.363   | -0.629±0.811 | 6.81E-12 |
| cg21542793 | 2  | 96781891  | <i>ADRA2B</i>       | -1.203±0.33  | -0.22±0.785  | 6.82E-12 |
| cg10331038 | 1  | 175376028 | <i>TNR</i>          | 1.66±0.24    | 0.539±0.907  | 6.88E-12 |
| cg12907644 | 11 | 18270341  | <i>SAA2</i>         | 0.294±0.191  | -0.371±0.536 | 6.97E-12 |
| cg24176563 | 6  | 133562776 | <i>EYA4</i>         | -3.157±0.562 | -1.448±1.369 | 6.99E-12 |
| cg09427311 | 9  | 129885730 | <i>ANGPTL2</i>      | -1.529±0.438 | -0.338±0.946 | 7.00E-12 |
| cg20162146 | 22 | 35795394  | <i>MCM5</i>         | 2.268±0.456  | 1.273±0.769  | 7.10E-12 |
| cg20775254 | 2  | 95940705  | <i>PROM2</i>        | 1.304±0.256  | 0.47±0.67    | 7.16E-12 |
| cg03469054 | 12 | 130387861 | <i>TMEM132D</i>     | -3.159±0.731 | -1.549±1.246 | 7.16E-12 |

|            |    |           |                  |              |              |          |
|------------|----|-----------|------------------|--------------|--------------|----------|
| cg17861230 | 19 | 18343901  | <i>PDE4C</i>     | -1.197±0.448 | 0.1±1.036    | 7.17E-12 |
| cg05140736 | 17 | 78195518  | <i>SGSH</i>      | 1.235±0.282  | 1.859±0.483  | 7.21E-12 |
| cg05404787 | 2  | 10281526  | <i>C2orf48</i>   | 2.915±0.35   | 2.104±0.633  | 7.22E-12 |
| cg27188703 | 12 | 50297581  | <i>FAIM2</i>     | -1.895±0.416 | -0.154±1.409 | 7.22E-12 |
| cg04809787 | 17 | 7348339   | <i>CHRNA1</i>    | -1.808±0.443 | -2.9±0.86    | 7.27E-12 |
| cg05292376 | 17 | 79095236  | <i>AATK</i>      | 1.338±0.272  | 0.646±0.547  | 7.28E-12 |
| cg22927134 | 15 | 34349252  | <i>CHRM5</i>     | 1.45±0.316   | 0.539±0.728  | 7.30E-12 |
| cg04765277 | 10 | 8094679   | <i>GATA3-AS1</i> | -1.329±0.251 | -0.392±0.757 | 7.34E-12 |
| cg19404582 | 9  | 140032953 | <i>GRIN1</i>     | -1.348±0.261 | -0.619±0.581 | 7.52E-12 |
| cg17910564 | 8  | 42248702  | <i>VDAC3</i>     | 0.554±0.309  | -0.422±0.785 | 7.56E-12 |
| cg09405083 | 10 | 104536121 | <i>WBP1L</i>     | -3.244±0.512 | -2.002±0.977 | 7.59E-12 |
| cg05379350 | 17 | 27917157  | <i>GIT1</i>      | -1.107±0.364 | -2.027±0.727 | 7.59E-12 |
| cg13018903 | 11 | 124806901 | <i>HEPACAM</i>   | 2.347±0.244  | 1.22±0.914   | 7.62E-12 |
| cg13449778 | 1  | 179712298 | <i>FAM163A</i>   | -3.919±0.73  | -1.975±1.546 | 7.69E-12 |
| cg18482268 | 5  | 145718965 | <i>POU4F3</i>    | -3.245±0.377 | -1.686±1.264 | 7.70E-12 |
| cg10039928 | 8  | 98880860  | <i>MATN2</i>     | 0.294±0.17   | -0.339±0.512 | 7.77E-12 |
| cg02677802 | 12 | 26822870  | <i>ITPR2</i>     | 1.082±0.197  | 0.75±0.235   | 7.79E-12 |
| cg25763788 | 6  | 78172950  | <i>HTR1B</i>     | -2.624±0.456 | -1.425±0.954 | 7.80E-12 |
| cg07879977 | 16 | 3254567   | <i>OR1F1</i>     | 0.781±0.269  | 0.023±0.607  | 7.99E-12 |
| cg22980079 | 4  | 2627118   | <i>FAM193A</i>   | 1.364±0.301  | 2.196±0.665  | 8.12E-12 |
| cg16361890 | 5  | 179220545 | <i>LTC4S</i>     | -0.825±0.21  | -0.078±0.604 | 8.26E-12 |
| cg06263495 | 11 | 2292004   | <i>ASCL2</i>     | -2.1±0.389   | -0.379±1.4   | 8.35E-12 |
| cg11428724 | 1  | 18957632  | <i>PAX7</i>      | -2.58±0.662  | -0.967±1.275 | 8.39E-12 |
| cg15279364 | 7  | 98466963  | <i>TMEM130</i>   | -2.717±0.333 | -1.242±1.199 | 8.40E-12 |
| cg24820809 | 22 | 36019252  | <i>MB</i>        | 2.651±0.186  | 1.484±0.951  | 8.53E-12 |
| cg05131835 | 17 | 61959145  | <i>GH2</i>       | 1.793±0.154  | 1.223±0.462  | 8.53E-12 |
| cg25148589 | 4  | 158141936 | <i>GRIA2</i>     | -1.208±0.283 | -0.383±0.663 | 8.55E-12 |
| cg25322008 | 11 | 4719138   | <i>OR51E2</i>    | 1.054±0.205  | 0.239±0.662  | 8.56E-12 |
| cg10832945 | 2  | 240499879 | <i>0</i>         | 0.82±0.277   | -0.051±0.703 | 8.58E-12 |
| cg06339657 | 5  | 76505932  | <i>PDE8B</i>     | -1.022±0.3   | -0.135±0.713 | 8.58E-12 |
| cg25372195 | 12 | 55042293  | <i>DCD</i>       | 0.813±0.212  | -0.126±0.764 | 8.59E-12 |
| cg11119884 | 1  | 91818587  | <i>HFM1</i>      | 1.118±0.372  | 0.192±0.734  | 8.60E-12 |
| cg06911084 | 7  | 96652894  | <i>DLX5</i>      | -2.037±0.365 | -0.938±0.885 | 8.70E-12 |
| cg07888234 | 18 | 59992252  | <i>TNFRSF11A</i> | -2.856±0.391 | -3.459±0.403 | 8.76E-12 |
| cg26514492 | 14 | 105531893 | <i>GPR132</i>    | -0.792±0.371 | -1.859±0.858 | 8.84E-12 |
| cg23018448 | 19 | 10811855  | <i>QTRT1</i>     | -0.8±0.182   | -1.418±0.502 | 9.05E-12 |
| cg03616357 | 4  | 156297942 | <i>MAP9</i>      | -3.296±0.354 | -4.208±0.728 | 9.09E-12 |
| cg07092725 | 14 | 63568796  | <i>KCNH5</i>     | 2.858±0.477  | 1.801±0.826  | 9.14E-12 |
| cg03918304 | 2  | 176981654 | <i>HOXD10</i>    | -1.64±0.457  | -0.505±0.901 | 9.26E-12 |
| cg20587394 | 12 | 54332209  | <i>HOXC13</i>    | -3.636±0.541 | -2.291±1.069 | 9.26E-12 |
| cg14378057 | 6  | 42788563  | <i>GLTSCR1L</i>  | 0.892±0.211  | 1.223±0.224  | 9.27E-12 |
| cg02656594 | 16 | 27412496  | <i>IL21R</i>     | 0.279±0.303  | -0.858±0.925 | 9.28E-12 |
| cg00406844 | 22 | 32753939  | <i>RFPL3</i>     | 1.266±0.273  | 0.454±0.655  | 9.32E-12 |
| cg24309555 | 2  | 21266956  | <i>APOB</i>      | 0.142±0.275  | -0.683±0.666 | 9.35E-12 |
| cg11612345 | 6  | 168842491 | <i>SMOC2</i>     | -2.278±0.507 | -0.953±1.06  | 9.38E-12 |
| cg11237817 | 19 | 55235762  | <i>KIR3DL3</i>   | 1.25±0.265   | 0.515±0.59   | 9.46E-12 |
| cg24800887 | 16 | 89883988  | <i>FANCA</i>     | 2.815±0.315  | 1.754±0.861  | 9.47E-12 |
| cg10358212 | 16 | 81069005  | <i>ATMIN</i>     | 1.387±0.304  | 0.394±0.805  | 9.50E-12 |
| cg18839416 | 1  | 12805849  | <i>C1orf158</i>  | 0.819±0.227  | -0.073±0.727 | 9.51E-12 |
| cg13035743 | 6  | 32119685  | <i>PRRT1</i>     | -2.438±0.44  | -0.757±1.371 | 9.78E-12 |
| cg13631913 | 1  | 9600345   | <i>SLC25A33</i>  | -4.118±0.439 | -4.825±0.491 | 9.88E-12 |
| cg22123464 | 19 | 47974901  | <i>SLC8A2</i>    | -1.878±0.296 | -0.836±0.849 | 1.01E-11 |
| cg15129294 | 17 | 34639274  | <i>CCL4L2</i>    | 0.256±0.256  | -0.703±0.783 | 1.03E-11 |
| cg23113963 | 16 | 23313293  | <i>SCNN1B</i>    | -2.918±0.437 | -1.648±1.027 | 1.05E-11 |
| cg07374637 | 21 | 31875448  | <i>KRTAP19-5</i> | 2.252±0.241  | 1.242±0.827  | 1.06E-11 |
| cg14086122 | 12 | 123921793 | <i>RILPL2</i>    | -0.326±0.295 | -1.114±0.634 | 1.06E-11 |
| cg10521852 | 19 | 19739820  | <i>LPAR2</i>     | -0.56±0.272  | -1.522±0.785 | 1.09E-11 |
| cg21280510 | 1  | 40137089  | <i>NT5C1A</i>    | -1.085±0.299 | -0.387±0.553 | 1.10E-11 |
| cg20339230 | 15 | 92937360  | <i>ST8SIA2</i>   | -3.43±0.65   | -1.697±1.394 | 1.10E-11 |
| cg14166009 | 19 | 37825309  | <i>HKR1</i>      | -1.131±0.369 | -0.018±0.904 | 1.13E-11 |
| cg04322134 | 9  | 34328884  | <i>KIF24</i>     | -3.828±0.384 | -4.564±0.559 | 1.13E-11 |
| cg22335340 | 12 | 7055153   | <i>PTPN6</i>     | 0.73±0.224   | -0.035±0.624 | 1.13E-11 |
| cg10968815 | 20 | 31595346  | <i>BPIFB2</i>    | 1.759±0.264  | 0.64±0.918   | 1.14E-11 |
| cg15761233 | 2  | 200819070 | <i>C2orf47</i>   | 1.676±0.3    | 0.813±0.699  | 1.15E-11 |
| cg22772698 | 20 | 56195991  | <i>ZBP1</i>      | 0.128±0.319  | -0.513±0.494 | 1.15E-11 |
| cg17349199 | 10 | 118429452 | <i>C10orf82</i>  | 0.402±0.336  | 1.515±0.908  | 1.16E-11 |
| cg09053680 | 10 | 135044114 | <i>UTF1</i>      | -3.244±1.281 | -0.912±1.741 | 1.17E-11 |

|            |    |           |              |              |              |          |
|------------|----|-----------|--------------|--------------|--------------|----------|
| cg20308679 | 2  | 183731407 | FRZB         | -3.476±0.335 | -2.18±1.063  | 1.17E-11 |
| cg27090087 | 6  | 54172378  | TINAG        | -0.179±0.231 | -1.012±0.682 | 1.18E-11 |
| cg09828634 | 21 | 31859610  | KRTAP19-2    | 2.815±0.335  | 1.53±1.055   | 1.20E-11 |
| cg15610233 | 8  | 24297874  | ADAM7        | 1.41±0.339   | 0.647±0.603  | 1.20E-11 |
| cg13587552 | 1  | 1216441   | SCNN1D       | 1.713±0.251  | 0.916±0.65   | 1.20E-11 |
| cg13102585 | 17 | 42386208  | RUNDC3A      | -2.198±0.271 | -1.168±0.844 | 1.20E-11 |
| cg25176823 | 7  | 5632593   | FSCN1        | -2.975±0.374 | -1.812±0.947 | 1.21E-11 |
| cg25890048 | 11 | 55703443  | OR5I1        | 2.004±0.241  | 0.921±0.891  | 1.21E-11 |
| cg05194726 | 12 | 2944480   | NRIP2        | -1.986±0.545 | -0.781±0.95  | 1.23E-11 |
| cg13351583 | 9  | 91793648  | SHC3         | -2.317±0.314 | -3.13±0.655  | 1.24E-11 |
| cg02860342 | 15 | 73661484  | HCN4         | -1.524±0.225 | -0.629±0.736 | 1.25E-11 |
| cg12508624 | 11 | 119293780 | THY1         | -3.973±0.507 | -2.203±1.451 | 1.26E-11 |
| cg00280814 | 22 | 23745389  | ZDHHC8P1     | 2.296±0.266  | 1.825±0.348  | 1.26E-11 |
| cg10667970 | 1  | 11724057  | FBXO6        | -2.076±0.27  | -2.798±0.584 | 1.26E-11 |
| cg02586730 | 11 | 65639869  | EFEMP2       | -0.183±0.237 | 0.554±0.602  | 1.29E-11 |
| cg11695358 | 8  | 144797963 | MAPK15       | 2.37±0.28    | 1.461±0.744  | 1.29E-11 |
| cg27243140 | 17 | 72931664  | OTOP3        | -2.435±0.488 | -1.215±0.98  | 1.29E-11 |
| cg24674703 | 11 | 60869960  | CD5          | 1.803±0.422  | 0.913±0.697  | 1.31E-11 |
| cg25228126 | 17 | 42635310  | FZD2         | -3.388±0.478 | -1.596±1.474 | 1.31E-11 |
| cg27513764 | 17 | 60457961  | EFCAB3       | 1.655±0.275  | 0.592±0.875  | 1.32E-11 |
| cg03556497 | 20 | 37352792  | SLC32A1      | -3.55±0.354  | -2.343±0.99  | 1.32E-11 |
| cg21575929 | 5  | 159344281 | ADRA1B       | 4.371±0.324  | 3.745±0.479  | 1.33E-11 |
| cg26960719 | 17 | 68071302  | KCNJ16       | 1.182±0.319  | 0.117±0.874  | 1.35E-11 |
| cg00848461 | 5  | 176732093 | PRELID1      | 1.551±0.331  | 0.597±0.777  | 1.36E-11 |
| cg19328294 | 16 | 2908554   | PRSS22       | -2.437±0.378 | -3.157±0.549 | 1.37E-11 |
| cg05598246 | 6  | 29624414  | MOG          | 0.364±0.302  | 1.074±0.567  | 1.40E-11 |
| cg12265829 | 14 | 24804022  | ADCY4        | -3.86±0.5    | -1.736±1.754 | 1.43E-11 |
| cg26557658 | 1  | 20878787  | FAM43B       | -3.286±0.257 | -1.881±1.164 | 1.46E-11 |
| cg20950011 | 18 | 12254377  | CIDEA        | -3.323±0.591 | -1.786±1.244 | 1.48E-11 |
| cg05389335 | 4  | 104641319 | TACR3        | -2.938±0.465 | -1.642±1.056 | 1.48E-11 |
| cg03789934 | 19 | 56342665  | NLRP11       | 0.152±0.207  | -0.49±0.526  | 1.48E-11 |
| cg12530080 | 5  | 22141639  | PMCHL1       | 1.011±0.223  | -0.349±1.128 | 1.50E-11 |
| cg04845628 | 3  | 97690690  | MINA         | -1.959±0.261 | -2.616±0.531 | 1.51E-11 |
| cg20404387 | 1  | 20879296  | FAM43B       | -2.914±0.496 | -1.351±1.283 | 1.52E-11 |
| cg03840259 | 22 | 40297036  | GRAP2        | 0.047±0.44   | -1.009±0.849 | 1.52E-11 |
| cg04219321 | 17 | 53341659  | HLF          | -2.694±0.344 | -1.259±1.188 | 1.55E-11 |
| cg04599297 | 10 | 26505442  | GAD2         | -2.736±0.273 | -1.379±1.126 | 1.56E-11 |
| cg25066857 | 2  | 85921438  | GNLY         | 1.37±0.356   | 0.681±0.53   | 1.57E-11 |
| cg11261264 | 19 | 55720737  | PTPRH        | 2.184±0.231  | 1.1±0.899    | 1.58E-11 |
| cg19103609 | 19 | 14543524  | PKN1         | 0.813±0.327  | -0.117±0.761 | 1.58E-11 |
| cg22458082 | 15 | 31947546  | OTUD7A       | 2.088±0.25   | 1.507±0.466  | 1.60E-11 |
| cg18345635 | 17 | 80186080  | SLC16A3      | -0.056±0.29  | -0.809±0.612 | 1.62E-11 |
| cg05421688 | 1  | 179711859 | FAM163A      | -3.798±0.488 | -2.207±1.312 | 1.62E-11 |
| cg16678925 | 17 | 3100972   | OR1A2        | 0.596±0.269  | -0.236±0.684 | 1.63E-11 |
| cg24250393 | 16 | 23846838  | PRKCB        | -2.574±0.383 | -1.298±1.053 | 1.66E-11 |
| cg23254045 | 15 | 38226454  | TMCO5A       | 0.368±0.312  | -0.325±0.552 | 1.67E-11 |
| cg04491443 | 16 | 20415966  | PDILT        | 3.483±0.286  | 2.232±1.039  | 1.69E-11 |
| cg08529852 | 9  | 139557920 | EGFL7        | 0.653±0.228  | 1.429±0.64   | 1.69E-11 |
| cg27167601 | 15 | 61521923  | RORA         | -3.721±0.473 | -2.468±1.021 | 1.70E-11 |
| cg15531099 | 1  | 152770502 | LCE1D        | 0.446±0.287  | -0.45±0.738  | 1.70E-11 |
| cg16869108 | 3  | 10184319  | VHL          | 1.268±0.363  | 0.083±0.978  | 1.72E-11 |
| cg07447922 | 1  | 38230827  | EPHA10       | -3.588±0.501 | -1.897±1.398 | 1.72E-11 |
| cg07310661 | 2  | 225449833 | CUL3         | -2.98±0.381  | -2.372±0.43  | 1.73E-11 |
| cg25363445 | 11 | 44326516  | ALX4         | -2.401±0.271 | -1.224±0.979 | 1.74E-11 |
| cg26626089 | 19 | 54385865  | PRKCG        | -3.117±0.294 | -2.106±0.838 | 1.81E-11 |
| cg14473924 | 3  | 73674170  | PDZRN3       | -2.02±0.515  | -0.76±1.021  | 1.82E-11 |
| cg20972214 | 12 | 8088818   | SLC2A3       | -4.278±0.559 | -2.205±1.721 | 1.83E-11 |
| cg06269753 | 8  | 72755871  | LOC100132891 | -2.519±0.321 | -1.305±1.009 | 1.83E-11 |
| cg11084611 | 2  | 132480958 | C2orf27A     | 2.903±0.218  | 2.117±0.653  | 1.91E-11 |
| cg02889982 | 17 | 16946247  | MPRIIP       | -0.77±0.156  | -0.502±0.199 | 1.97E-11 |
| cg08314660 | 11 | 394199    | PKP3         | 1.886±0.245  | 1.096±0.654  | 1.97E-11 |
| cg24323726 | 3  | 111314186 | ZBED2        | 0.832±0.282  | -0.086±0.761 | 2.02E-11 |
| cg11500797 | 7  | 96652123  | DLX5         | -2.042±0.331 | -0.738±1.088 | 2.05E-11 |
| cg13993218 | 11 | 2181866   | INS-IGF2     | 0.448±0.246  | -0.356±0.668 | 2.07E-11 |
| cg03064067 | 12 | 85306916  | SLC6A15      | -2.509±0.387 | -0.917±1.33  | 2.08E-11 |
| cg14532417 | 17 | 34503322  | TBC1D3B      | 1.801±0.276  | 1.223±0.458  | 2.08E-11 |
| cg26353877 | 1  | 159557886 | APCS         | 2.216±0.231  | 1.247±0.809  | 2.08E-11 |

|            |    |           |           |              |              |          |
|------------|----|-----------|-----------|--------------|--------------|----------|
| cg10316764 | 16 | 29984665  | TAOK2     | -0.724±0.349 | 0.061±0.623  | 2.08E-11 |
| cg12128839 | 7  | 27183436  | HOXA5     | -2.096±0.55  | -0.669±1.167 | 2.08E-11 |
| cg09674215 | 7  | 19158134  | TWIST1    | -2.909±0.295 | -1.693±1.016 | 2.08E-11 |
| cg04291079 | 14 | 101294430 | MEG3      | 1.791±0.297  | 2.809±0.848  | 2.09E-11 |
| cg03673470 | 1  | 238055429 | ZP4       | 2.208±0.243  | 1.27±0.783   | 2.12E-11 |
| cg03665605 | 7  | 99064212  | ATP5J2    | 2.651±0.261  | 1.833±0.679  | 2.12E-11 |
| cg21350115 | 2  | 188312833 | CALCRL    | -1.863±0.241 | -0.893±0.81  | 2.13E-11 |
| cg16098981 | 20 | 24449865  | SYNDIG1   | -3.753±0.545 | -2.015±1.443 | 2.13E-11 |
| cg25361106 | 2  | 74740746  | TLX2      | -3.166±0.424 | -1.796±1.138 | 2.14E-11 |
| cg16422907 | 13 | 37006734  | CCNA1     | -2.307±0.297 | -1.037±1.062 | 2.15E-11 |
| cg13789236 | 9  | 79009433  | RFK       | -3.783±0.429 | -3.048±0.547 | 2.16E-11 |
| cg08254089 | 20 | 36933189  | BPI       | -0.212±0.268 | -1.098±0.737 | 2.16E-11 |
| cg16620032 | 19 | 46097075  | GPR4      | -2.163±0.342 | -2.822±0.512 | 2.17E-11 |
| cg21669679 | 18 | 49866548  | DCC       | -3.586±0.543 | -2.21±1.126  | 2.18E-11 |
| cg22190114 | 19 | 56459234  | NLRP8     | 3.064±0.284  | 1.813±1.048  | 2.18E-11 |
| cg05782445 | 2  | 26915207  | KCNK3     | -1.403±0.223 | -0.702±0.581 | 2.18E-11 |
| cg11653709 | 9  | 21968146  | CDKN2A    | -2.381±0.305 | -1.399±0.817 | 2.20E-11 |
| cg00292971 | 7  | 143060536 | FAM131B   | 0.332±0.423  | 1.116±0.602  | 2.21E-11 |
| cg20588069 | 4  | 4860439   | MSX1      | -1.568±0.287 | -0.602±0.805 | 2.22E-11 |
| cg02452985 | 14 | 99737548  | BCL11B    | -4.041±0.833 | -2.023±1.644 | 2.23E-11 |
| cg01970325 | 9  | 140354241 | NSMF      | 0.647±0.285  | -0.05±0.568  | 2.26E-11 |
| cg19690404 | 7  | 129933646 | CPA4      | 0.327±0.3    | -0.569±0.743 | 2.26E-11 |
| cg11959435 | 9  | 21440836  | IFNA1     | 1.643±0.236  | 0.882±0.633  | 2.26E-11 |
| cg25974617 | 8  | 71520962  | LOC286190 | 0.023±0.286  | -0.862±0.736 | 2.27E-11 |
| cg17026542 | 6  | 132022490 | OR2A4     | 1.795±0.314  | 1.168±0.494  | 2.27E-11 |
| cg03973663 | 8  | 56791576  | LYN       | -1.332±0.324 | -2.117±0.64  | 2.32E-11 |
| cg00234616 | 2  | 74740572  | TLX2      | -1.655±0.469 | -0.523±0.923 | 2.33E-11 |
| cg20025656 | 1  | 229570230 | ACTA1     | -2.749±0.342 | -1.537±1.013 | 2.33E-11 |
| cg19391527 | 8  | 28173732  | PNOC      | 0.363±0.314  | -0.474±0.689 | 2.36E-11 |
| cg00263760 | 10 | 118897366 | VAX1      | -3.166±0.557 | -1.589±1.306 | 2.40E-11 |
| cg14034870 | 6  | 30900197  | SFTA2     | 0.069±0.223  | -0.7±0.643   | 2.45E-11 |
| cg09179743 | 9  | 27524436  | IFNK      | 1.735±0.358  | 1.047±0.537  | 2.46E-11 |
| cg08458170 | 19 | 31770476  | TSHZ3     | 3.783±0.25   | 2.663±0.942  | 2.47E-11 |
| cg03103192 | 4  | 52917271  | SPATA18   | 0.696±0.288  | -0.127±0.683 | 2.47E-11 |
| cg24432073 | 4  | 76555634  | CDKL2     | -4.144±0.351 | -4.814±0.523 | 2.47E-11 |
| cg04897683 | 5  | 134871462 | NEUROG1   | -2.445±0.538 | -1.099±1.104 | 2.48E-11 |
| cg04315771 | 19 | 50433949  | NUP62     | -0.834±0.334 | 0.051±0.73   | 2.51E-11 |
| cg21418052 | 13 | 31773806  | B3GALT    | -0.567±0.22  | -1.114±0.448 | 2.53E-11 |
| cg06914598 | 7  | 5085121   | RBAK      | -1.118±0.237 | -0.538±0.475 | 2.55E-11 |
| cg14787704 | 5  | 65449380  | SREK1     | -0.539±0.291 | 0.279±0.679  | 2.58E-11 |
| cg04052038 | 21 | 31588123  | CLDN8     | 2.257±0.377  | 1.213±0.865  | 2.59E-11 |
| cg07550362 | 7  | 97361201  | TAC1      | -3.123±0.423 | -2.002±0.925 | 2.63E-11 |
| cg15075718 | 11 | 119217176 | C1QTNF5   | 1.296±0.258  | 0.525±0.642  | 2.66E-11 |
| cg18997129 | 7  | 143105850 | EPHA1     | -0.632±0.26  | -1.449±0.683 | 2.75E-11 |
| cg11191210 | 6  | 117585815 | VGLL2     | -3.48±0.38   | -1.924±1.311 | 2.77E-11 |
| cg00333226 | 7  | 49813763  | VWC2      | -2.362±0.429 | -0.949±1.184 | 2.79E-11 |
| cg15736165 | 15 | 83951732  | BNC1      | -2.213±0.264 | -1.074±0.961 | 2.92E-11 |
| cg02936263 | 17 | 32596886  | CCL7      | 1.7±0.314    | 0.736±0.807  | 2.92E-11 |
| cg00718513 | 2  | 89215272  | 0         | 0±0.727      | -1.238±0.93  | 2.94E-11 |
| cg02115041 | 8  | 53852101  | NPBWR1    | -3.246±0.384 | -2.071±0.984 | 2.97E-11 |
| cg24599942 | 8  | 41386345  | GIN5      | -0.7±0.359   | -1.471±0.622 | 2.99E-11 |
| cg00136477 | 1  | 22970339  | C1QC      | 0.987±0.213  | 0.455±0.438  | 2.99E-11 |
| cg24304714 | 1  | 152779374 | LCE1C     | -0.939±0.213 | -1.454±0.423 | 2.99E-11 |
| cg10114327 | 4  | 122301573 | QRFR      | -1.144±0.345 | -0.184±0.799 | 3.02E-11 |
| cg09191626 | 11 | 13983986  | SPON1     | -1.596±0.294 | -0.668±0.779 | 3.05E-11 |
| cg26922202 | 9  | 35957984  | OR2S2     | 0.93±0.282   | 0.117±0.679  | 3.06E-11 |
| cg22619018 | 8  | 4852624   | CSMD1     | -3.27±0.911  | -1.384±1.512 | 3.06E-11 |
| cg27504299 | 14 | 96152109  | TCL1B     | 1.955±0.229  | 0.891±0.901  | 3.08E-11 |
| cg00243313 | 5  | 1883413   | IRX4      | -4.751±0.547 | -2.543±1.866 | 3.09E-11 |
| cg21790626 | 19 | 58220494  | ZNF154    | -3.912±0.611 | -1.577±1.973 | 3.11E-11 |
| cg18557145 | 9  | 35618083  | CD72      | 2.676±0.35   | 1.914±0.618  | 3.14E-11 |
| cg13784557 | 6  | 31430916  | HCP5      | -3.909±0.367 | -4.461±0.385 | 3.19E-11 |
| cg07548313 | 1  | 158259926 | CD1C      | 1.631±0.361  | 0.642±0.824  | 3.20E-11 |
| cg13634319 | 12 | 56323727  | DGKA      | 0.253±0.389  | -0.68±0.768  | 3.27E-11 |
| cg17913068 | 11 | 70116114  | PPFIA1    | -3.772±0.243 | -4.173±0.297 | 3.29E-11 |
| cg22334665 | 6  | 110797497 | SLC22A16  | -4.209±0.454 | -2.255±1.656 | 3.30E-11 |
| cg23192899 | 2  | 55746287  | CCDC104   | -3.853±0.484 | -4.667±0.61  | 3.30E-11 |

|            |    |           |               |              |              |          |
|------------|----|-----------|---------------|--------------|--------------|----------|
| cg13959523 | 19 | 34175481  | CHST8         | -3.77±0.427  | -2.529±1.04  | 3.34E-11 |
| cg08782122 | 7  | 153110994 | 0             | 4.632±0.32   | 3.858±0.638  | 3.38E-11 |
| cg06818777 | 17 | 48546620  | CHAD          | -1.182±0.426 | -0.203±0.802 | 3.38E-11 |
| cg04527918 | 2  | 27531170  | UCN           | 0.296±0.327  | 1.24±0.791   | 3.42E-11 |
| cg27562023 | 17 | 201675    | RPH3AL        | 0.891±0.348  | 0.252±0.493  | 3.43E-11 |
| cg05649009 | 2  | 175629850 | CHRNA1        | 1.507±0.246  | 0.432±0.913  | 3.44E-11 |
| cg27118825 | 19 | 46318748  | RSPH6A        | -0.984±0.21  | -0.42±0.47   | 3.47E-11 |
| cg16473288 | 9  | 125290120 | OR1N1         | 2.025±0.261  | 1.214±0.683  | 3.51E-11 |
| cg00136405 | 4  | 123542198 | IL21          | 0.313±0.281  | -0.633±0.799 | 3.51E-11 |
| cg17586860 | 20 | 23015906  | SSTR4         | -1.54±0.537  | -0.334±0.986 | 3.51E-11 |
| cg22498251 | 7  | 19157710  | TWIST1        | -2.439±0.183 | -1.377±0.905 | 3.54E-11 |
| cg11484872 | 6  | 31543169  | TNF           | 0.625±0.387  | -0.234±0.702 | 3.55E-11 |
| cg04424621 | 6  | 27101941  | HIST1H2BJ     | -1.008±0.38  | -2.2±1.004   | 3.56E-11 |
| cg16794882 | 5  | 70670374  | PMCHL2        | 1.538±0.292  | 0.938±0.483  | 3.58E-11 |
| cg25042226 | 2  | 114036571 | PAX8          | 3.342±0.317  | 3.898±0.427  | 3.62E-11 |
| cg27429194 | 17 | 3099847   | OR1A2         | 0.359±0.196  | -0.143±0.417 | 3.63E-11 |
| cg08797106 | 6  | 26021008  | HIST1H3A      | -2.413±0.19  | -1.799±0.518 | 3.63E-11 |
| cg19282250 | 9  | 79328522  | PRUNE2        | -0.011±0.326 | 0.804±0.676  | 3.63E-11 |
| cg24875415 | 20 | 23669470  | CST4          | 2.476±0.248  | 1.725±0.632  | 3.63E-11 |
| cg12237269 | 11 | 107582734 | SLN           | 0.985±0.222  | 0.143±0.715  | 3.65E-11 |
| cg00725635 | 1  | 193155806 | B3GALT2       | -3.231±0.472 | -1.753±1.248 | 3.67E-11 |
| cg05790038 | 17 | 3461143   | TRPV3         | 1.116±0.381  | 0.152±0.801  | 3.71E-11 |
| cg22485810 | 17 | 29248725  | ADAP2         | -1.267±0.27  | -2.103±0.706 | 3.72E-11 |
| cg03766965 | 16 | 30718443  | SRCAP         | 0.184±0.303  | 0.952±0.639  | 3.74E-11 |
| cg04121771 | 3  | 149191624 | TM4SF4        | -0.51±0.294  | -1.316±0.674 | 3.75E-11 |
| cg10523494 | 17 | 72528386  | CD300LB       | -0.246±0.317 | -1.243±0.842 | 3.76E-11 |
| cg07599644 | 11 | 33693866  | KIAA1549L     | 1.55±0.359   | 0.68±0.721   | 3.76E-11 |
| cg03885639 | 11 | 124481310 | PANX3         | 1.761±0.178  | 1.189±0.483  | 3.79E-11 |
| cg04005707 | 4  | 48988321  | CWH43         | -2.953±0.695 | -1.402±1.271 | 3.85E-11 |
| cg06144905 | 17 | 27369780  | PIPOX         | -0.92±0.262  | -1.839±0.78  | 3.85E-11 |
| cg03625911 | 1  | 203155737 | CHI3L1        | 0.177±0.192  | -0.475±0.553 | 3.86E-11 |
| cg00503840 | 7  | 96650509  | DLX5          | -0.06±0.167  | 0.544±0.513  | 3.89E-11 |
| cg24092914 | 3  | 10184877  | VHL           | 0.335±0.487  | -0.771±0.909 | 3.90E-11 |
| cg12951282 | 17 | 7018416   | ASGR2         | -0.546±0.339 | -1.591±0.883 | 3.91E-11 |
| cg10189763 | 4  | 71337726  | MUC7          | 0.297±0.284  | -0.474±0.647 | 3.92E-11 |
| cg20576002 | 12 | 54867653  | GTSF1         | 2.005±0.255  | 1.103±0.767  | 3.92E-11 |
| cg01796223 | 7  | 129933014 | CPA4          | 0.17±0.316   | -0.453±0.498 | 3.92E-11 |
| cg10257049 | 5  | 154230308 | FAXDC2        | -2.455±0.501 | -1.16±1.081  | 3.94E-11 |
| cg19854301 | 16 | 82671450  | CDH13         | 3.293±0.323  | 2.139±0.981  | 3.95E-11 |
| cg21272774 | 12 | 54393725  | HOXC9         | -3.424±0.373 | -1.792±1.392 | 3.96E-11 |
| cg13412615 | 11 | 64057807  | KCNK4         | 1.958±0.151  | 1.435±0.445  | 3.99E-11 |
| cg18003231 | 22 | 18043745  | SLC25A18      | 1.741±0.268  | 2.317±0.469  | 4.01E-11 |
| cg15484375 | 11 | 18287647  | SAA1          | 0.006±0.188  | -0.713±0.613 | 4.19E-11 |
| cg18573383 | 12 | 75603401  | KCNC2         | -3.533±0.33  | -2.275±1.073 | 4.22E-11 |
| cg12334759 | 19 | 475154    | ODF3L2        | 1.369±0.297  | 0.577±0.665  | 4.26E-11 |
| cg03425110 | 10 | 71333037  | NEUROG3       | -4.669±0.522 | -2.649±1.724 | 4.29E-11 |
| cg25229305 | 10 | 118956639 | KCNK18        | 0.795±0.29   | -0.008±0.677 | 4.30E-11 |
| cg11061975 | 20 | 1639325   | SIRPG         | 2.1±0.208    | 1.099±0.857  | 4.40E-11 |
| cg11248413 | 5  | 134871658 | NEUROG1       | -3.361±0.741 | -1.642±1.423 | 4.40E-11 |
| cg25061755 | 2  | 48808114  | STON1-GTF2A1L | 2.185±0.345  | 1.292±0.748  | 4.41E-11 |
| cg12294121 | 4  | 47033575  | GABRB1        | -3.648±0.543 | -1.992±1.404 | 4.42E-11 |
| cg10305797 | 19 | 35981677  | KRTDAP        | 1.053±0.301  | 0.05±0.853   | 4.44E-11 |
| cg22359606 | 2  | 182545492 | NEUROD1       | -3.141±0.241 | -1.632±1.296 | 4.46E-11 |
| cg09837943 | 19 | 57306631  | ZIM2          | 1.104±0.27   | 0.396±0.594  | 4.52E-11 |
| cg19807685 | 16 | 82068980  | HSD17B2       | 1.382±0.246  | 0.431±0.813  | 4.53E-11 |
| cg05158615 | 7  | 24323559  | NPY           | -2.837±0.424 | -1.347±1.272 | 4.64E-11 |
| cg21105318 | 2  | 161056520 | ITGB6         | 1.255±0.324  | 0.237±0.866  | 4.67E-11 |
| cg00013618 | 22 | 22380839  | 0             | 1.956±0.265  | 1.009±0.81   | 4.70E-11 |
| cg13547644 | 1  | 229569608 | ACTA1         | -2.568±0.623 | -1.079±1.24  | 4.70E-11 |
| cg19007731 | 8  | 93107394  | RUNX1T1       | -0.904±0.31  | -0.111±0.666 | 4.70E-11 |
| cg13645811 | 6  | 158403520 | SYNJ2         | -2.202±0.396 | -2.843±0.479 | 4.71E-11 |
| cg14165663 | 17 | 74070269  | GALR2         | -1.209±0.279 | -0.301±0.774 | 4.72E-11 |
| cg03218909 | 1  | 156589008 | HAPLN2        | -1.852±0.27  | -2.319±0.361 | 4.72E-11 |
| cg05253327 | 2  | 62420915  | 0             | 1.635±0.207  | 1.964±0.243  | 4.76E-11 |
| cg01913908 | 3  | 102154676 | ZPLD1         | 1.884±0.218  | 1.551±0.239  | 4.93E-11 |
| cg12478185 | 17 | 10602001  | ADPRM         | -0.304±0.371 | -1.007±0.56  | 4.93E-11 |
| cg09222115 | 2  | 241079766 | OTOS          | 0.519±0.206  | 1.179±0.563  | 4.95E-11 |

|            |    |           |          |              |              |          |
|------------|----|-----------|----------|--------------|--------------|----------|
| cg25913233 | 5  | 151066683 | SPARC    | -3.705±0.315 | -2.532±1.006 | 5.01E-11 |
| cg09120035 | 8  | 143961145 | CYP11B1  | 2.205±0.233  | 1.217±0.849  | 5.06E-11 |
| cg27634151 | 11 | 94134646  | GPR83    | -3.075±0.439 | -1.713±1.16  | 5.08E-11 |
| cg14289511 | 16 | 24682446  | 0        | -2.429±0.435 | -1.178±1.062 | 5.09E-11 |
| cg16739580 | 3  | 191179074 | PYDC2    | 1.502±0.264  | 0.398±0.948  | 5.09E-11 |
| cg23898073 | 10 | 118032948 | GFRA1    | -4.182±0.63  | -2.248±1.647 | 5.13E-11 |
| cg12703269 | 15 | 77286232  | PSTPIP1  | 1.518±0.25   | 0.804±0.606  | 5.16E-11 |
| cg11201229 | 11 | 17191235  | PIK3C2A  | 1.728±0.318  | 2.218±0.355  | 5.18E-11 |
| cg12513379 | 19 | 15838397  | OR10H2   | -0.861±0.272 | -1.582±0.609 | 5.21E-11 |
| cg22461018 | 4  | 174538011 | 0        | 0.93±0.306   | 0.23±0.582   | 5.23E-11 |
| cg10141715 | 12 | 101603453 | SLC5A8   | -1.886±0.543 | -0.619±1.056 | 5.30E-11 |
| cg24625128 | 11 | 133939064 | JAM3     | -5.081±0.384 | -3.022±1.777 | 5.30E-11 |
| cg14463304 | 12 | 12965884  | DDX47    | -1.133±0.248 | -1.643±0.416 | 5.32E-11 |
| cg14696870 | 1  | 159258877 | FCER1A   | 2.043±0.282  | 0.749±1.116  | 5.46E-11 |
| cg27603796 | 7  | 117512803 | CTTNBP2  | -2.823±0.375 | -1.604±1.043 | 5.53E-11 |
| cg02723533 | 11 | 69468991  | CCND1    | 5.446±0.426  | 3.444±1.728  | 5.55E-11 |
| cg01805282 | 6  | 133563764 | EYA4     | -2.191±0.352 | -0.602±1.372 | 5.61E-11 |
| cg04995717 | 9  | 27109293  | TEK      | -1.228±0.281 | -0.366±0.737 | 5.62E-11 |
| cg13530946 | 1  | 220266799 | IARS2    | 0.481±0.331  | 1.238±0.63   | 5.64E-11 |
| cg02276665 | 5  | 138088442 | CTNNA1   | -0.649±0.243 | -1.166±0.426 | 5.87E-11 |
| cg00199549 | 22 | 35795374  | MCM5     | 3.7±0.464    | 2.395±1.11   | 5.87E-11 |
| cg20556988 | 17 | 32690127  | CCL1     | 2.266±0.253  | 1.13±0.982   | 6.03E-11 |
| cg25249068 | 3  | 133118940 | BFSP2    | 1.448±0.219  | 0.636±0.7    | 6.06E-11 |
| cg03522063 | 10 | 119302167 | EMX2     | -3.777±0.472 | -2.072±1.469 | 6.11E-11 |
| cg13722123 | 6  | 146350346 | GRM1     | -2.702±0.298 | -1.937±0.647 | 6.33E-11 |
| cg04126866 | 10 | 85932763  | C10orf99 | 2.83±0.297   | 2.257±0.464  | 6.36E-11 |
| cg20162076 | 6  | 6588089   | LY86     | 1.117±0.265  | 0.334±0.67   | 6.43E-11 |
| cg18988395 | 9  | 4152606   | GLIS3    | 0.995±0.34   | 0.354±0.515  | 6.43E-11 |
| cg10705800 | 1  | 41328420  | CITED4   | -1.071±0.337 | -1.963±0.758 | 6.45E-11 |
| cg09195271 | 1  | 20142497  | RNF186   | 1.352±0.34   | 0.378±0.832  | 6.45E-11 |
| cg08190291 | 21 | 28339442  | ADAMTS5  | -4.198±0.755 | -2.384±1.528 | 6.55E-11 |
| cg06937608 | 15 | 89346044  | ACAN     | -4.11±0.411  | -2.797±1.129 | 6.57E-11 |
| cg18509435 | 18 | 59157879  | CDH20    | 2.194±0.268  | 1.354±0.722  | 6.58E-11 |
| cg00350296 | 11 | 66084841  | CD248    | -2.035±0.299 | -0.98±0.911  | 6.68E-11 |
| cg25524473 | 10 | 112258394 | DUSP5    | -2.36±0.35   | -3.233±0.739 | 6.68E-11 |
| cg16708281 | 2  | 114256673 | FOXD4L1  | -0.646±0.191 | -0.162±0.411 | 6.95E-11 |
| cg15522957 | 11 | 44324925  | ALX4     | -1.031±0.291 | -0.119±0.785 | 6.95E-11 |
| cg06148175 | 11 | 67418148  | ACY3     | -1.257±0.263 | -1.89±0.534  | 6.97E-11 |
| cg23767977 | 12 | 52947465  | KRT71    | 2.769±0.367  | 1.81±0.817   | 6.99E-11 |
| cg03329165 | 3  | 112052218 | CD200    | -4.952±0.447 | -2.827±1.848 | 7.05E-11 |
| cg25107903 | 8  | 7321359   | SPAG11B  | -0.092±0.166 | -0.767±0.586 | 7.17E-11 |
| cg24276491 | 14 | 35009492  | EAPP     | 1.499±0.264  | 0.81±0.587   | 7.20E-11 |
| cg00512279 | 10 | 119000991 | SLC18A2  | -4.944±0.665 | -3.023±1.648 | 7.20E-11 |
| cg01731341 | 12 | 4554295   | FGF6     | 2.491±0.305  | 1.658±0.713  | 7.24E-11 |
| cg18353563 | 3  | 127390935 | ABTB1    | -2.115±0.567 | -3.11±0.785  | 7.31E-11 |
| cg08047907 | 1  | 169396858 | CCDC181  | -4.581±0.433 | -2.271±2.013 | 7.31E-11 |
| cg08260959 | 6  | 26240920  | HIST1H4F | -3.773±0.464 | -1.871±1.653 | 7.35E-11 |
| cg14861570 | 17 | 53499954  | MMD      | -1.109±0.206 | -1.595±0.411 | 7.37E-11 |
| cg16581199 | 5  | 112770721 | TSSK1B   | 2.156±0.338  | 1.296±0.731  | 7.37E-11 |
| cg18601426 | 7  | 158381220 | PTPRN2   | -1.509±0.231 | -0.698±0.703 | 7.49E-11 |
| cg04567009 | 1  | 161600769 | FCGR3B   | 2.136±0.292  | 1.004±0.984  | 7.58E-11 |
| cg22231902 | 2  | 119604901 | EN1      | -3.814±0.7   | -1.846±1.689 | 7.65E-11 |
| cg06940792 | 5  | 126626557 | MEGF10   | -4.272±0.502 | -2.699±1.358 | 7.65E-11 |
| cg21820677 | 4  | 46392528  | GABRA2   | -4.627±0.636 | -2.759±1.608 | 7.73E-11 |
| cg17906786 | 13 | 37247708  | SERTM1   | -1.339±0.267 | -0.634±0.603 | 7.83E-11 |
| cg16826286 | 17 | 34266290  | LYZL6    | 1.088±0.181  | 0.477±0.53   | 7.90E-11 |
| cg11136562 | 5  | 141061285 | ARAP3    | -0.427±0.26  | 0.16±0.494   | 7.92E-11 |
| cg18438777 | 4  | 164265745 | NPY5R    | -2.873±0.537 | -1.2±1.446   | 7.95E-11 |
| cg21023770 | 20 | 44517227  | SPATA25  | 0.639±0.234  | 1.176±0.453  | 7.96E-11 |
| cg05135288 | 16 | 717707    | RHOT2    | -0.045±0.198 | 0.609±0.567  | 8.11E-11 |
| cg11767711 | 19 | 36358783  | APLP1    | 2.174±0.235  | 1.59±0.497   | 8.18E-11 |
| cg02250594 | 18 | 55103353  | ONECUT2  | -2.277±0.617 | -0.918±1.14  | 8.26E-11 |
| cg08747377 | 16 | 82660670  | CDH13    | -4.101±0.618 | -2.471±1.397 | 8.30E-11 |
| cg13038560 | 2  | 200819113 | C2orf47  | 2.061±0.318  | 0.981±0.938  | 8.31E-11 |
| cg27168844 | 6  | 52051317  | IL17A    | 2.047±0.405  | 1.085±0.815  | 8.34E-11 |
| cg16413535 | 4  | 164395149 | TKTL2    | 2.945±0.362  | 1.975±0.832  | 8.39E-11 |
| cg16330965 | 15 | 66790390  | SNAPC5   | -0.182±0.359 | -0.917±0.609 | 8.39E-11 |

|            |    |           |             |              |              |          |
|------------|----|-----------|-------------|--------------|--------------|----------|
| cg05248470 | 19 | 54785348  | LILRB2      | 0.75±0.258   | -0.073±0.713 | 8.41E-11 |
| cg17405586 | 12 | 53074257  | KRT1        | 1.164±0.224  | 0.174±0.866  | 8.41E-11 |
| cg24975842 | 20 | 57416221  | GNAS        | -0.131±0.143 | 0.413±0.474  | 8.43E-11 |
| cg02311163 | 20 | 43850511  | SEMG2       | 1.978±0.199  | 0.997±0.859  | 8.56E-11 |
| cg12413566 | 3  | 39235366  | XIRP1       | 2.732±0.319  | 2.149±0.469  | 8.59E-11 |
| cg20277670 | 5  | 175110375 | HRH2        | 4.853±0.341  | 3.898±0.822  | 8.61E-11 |
| cg05998983 | 10 | 74653449  | OIT3        | 0.053±0.303  | 0.73±0.57    | 8.64E-11 |
| cg08459368 | 11 | 61974948  | SCGB2A1     | 1.76±0.314   | 0.99±0.656   | 8.64E-11 |
| cg24252809 | 11 | 18957451  | MRGPRX1     | 1.582±0.188  | 0.832±0.655  | 8.75E-11 |
| cg03889226 | 6  | 137815333 | OLIG3       | -3.63±0.312  | -2.247±1.21  | 8.75E-11 |
| cg25612480 | 8  | 48920460  | UBE2V2      | 1.611±0.518  | 0.546±0.884  | 8.76E-11 |
| cg10173075 | 15 | 89764836  | RLBP1       | 1.775±0.264  | 1.039±0.634  | 8.85E-11 |
| cg06308323 | 9  | 34459568  | DNAI1       | 2.344±0.344  | 1.765±0.453  | 8.86E-11 |
| cg14106085 | 1  | 47902269  | FOXD2       | -3.294±0.29  | -3.764±0.36  | 8.94E-11 |
| cg21053529 | 15 | 35046760  | GJD2        | -2.105±0.383 | -0.941±1.009 | 9.03E-11 |
| cg05046097 | 10 | 88717926  | SNCG        | 0.373±0.169  | 0.768±0.335  | 9.11E-11 |
| cg17834752 | 8  | 140715239 | KCNK9       | -4.303±0.657 | -2.305±1.732 | 9.11E-11 |
| cg16192029 | 7  | 117864674 | ANKRD7      | 4.905±0.329  | 3.392±1.326  | 9.16E-11 |
| cg03365437 | 15 | 58357874  | ALDH1A2     | -2.412±0.452 | -1.174±1.067 | 9.21E-11 |
| cg22461835 | 8  | 26723365  | ADRA1A      | -3.194±0.403 | -1.873±1.149 | 9.23E-11 |
| cg10942056 | 1  | 223101848 | DISP1       | -0.595±0.442 | 0.709±1.129  | 9.34E-11 |
| cg01853981 | 12 | 52946482  | KRT71       | 3.488±0.281  | 2.536±0.83   | 9.39E-11 |
| cg11214889 | 18 | 597111    | CLUL1       | -2.095±0.312 | -2.915±0.705 | 9.53E-11 |
| cg18338293 | 11 | 66277283  | BBS1        | 1.875±0.27   | 2.335±0.363  | 9.64E-11 |
| cg24338843 | 1  | 12806667  | C1orf158    | 1.122±0.278  | 0.25±0.758   | 9.67E-11 |
| cg20674577 | 20 | 58179540  | PHACTR3     | -1.967±0.318 | -1.048±0.796 | 9.75E-11 |
| cg06319346 | 15 | 30686892  | CHRFAM7A    | 1.809±0.198  | 1.273±0.462  | 9.78E-11 |
| cg10266490 | 1  | 55013709  | ACOT11      | -2.21±0.364  | -0.97±1.083  | 9.81E-11 |
| cg12799895 | 7  | 98246652  | NPTX2       | -1.308±0.645 | -0.175±0.904 | 9.83E-11 |
| cg19686152 | 15 | 52121542  | TMOD3       | 0.052±0.201  | -0.57±0.542  | 9.92E-11 |
| cg05976074 | 19 | 33716273  | SLC7A10     | -1.096±0.297 | -0.318±0.671 | 1.00E-10 |
| cg15984661 | 19 | 46916520  | CCDC8       | -3.854±0.312 | -2.591±1.109 | 1.02E-10 |
| cg01598642 | 11 | 5272039   | HBG1        | 2.413±0.197  | 1.39±0.901   | 1.02E-10 |
| cg00463848 | 12 | 53046105  | KRT2        | 2.396±0.306  | 1.137±1.107  | 1.03E-10 |
| cg04384208 | 1  | 161519396 | FCGR3A      | 0.903±0.405  | -0.105±0.865 | 1.04E-10 |
| cg22862656 | 11 | 62037659  | SCGB2A2     | 2.932±0.3    | 1.667±1.111  | 1.04E-10 |
| cg27465569 | 12 | 44153853  | IRAK4       | 1.51±0.26    | 0.638±0.763  | 1.05E-10 |
| cg25117362 | 10 | 104221598 | TMEM180     | -2.384±0.303 | -2.866±0.369 | 1.05E-10 |
| cg15722679 | 20 | 1638393   | SIRPG       | -1.002±0.384 | -1.647±0.507 | 1.05E-10 |
| cg13526007 | 14 | 42076710  | LRFN5       | -3.081±0.346 | -1.928±1.009 | 1.06E-10 |
| cg13084525 | 11 | 34642463  | EHF         | -1.218±0.278 | -1.787±0.475 | 1.07E-10 |
| cg16878021 | 14 | 106209463 | 0           | 4.321±0.358  | 3.482±0.717  | 1.07E-10 |
| cg00019495 | 4  | 57547525  | HOPX        | -1.398±0.397 | -2.218±0.687 | 1.07E-10 |
| cg27000831 | 17 | 32645748  | CCL8        | 1.25±0.319   | 0.12±0.991   | 1.08E-10 |
| cg24921089 | 11 | 10472840  | AMPD3       | -0.68±0.155  | -1.285±0.531 | 1.08E-10 |
| cg25384595 | 19 | 55105156  | LILRA1      | 0.088±0.327  | -0.77±0.74   | 1.09E-10 |
| cg26813458 | 19 | 42260485  | CEACAM6     | 2.165±0.218  | 1.393±0.677  | 1.09E-10 |
| cg10037068 | 2  | 175500072 | WIPF1       | 2.022±0.396  | 1.175±0.715  | 1.11E-10 |
| cg11234457 | 5  | 121187547 | FTMT        | 4.176±0.329  | 3.182±0.868  | 1.13E-10 |
| cg25944100 | 11 | 59824260  | MS4A3       | -0.202±0.27  | -1.148±0.83  | 1.13E-10 |
| cg23694248 | 12 | 71314315  | PTPRR       | -2.789±0.328 | -1.355±1.265 | 1.14E-10 |
| cg06139836 | 10 | 131762961 | EBF3        | -3.557±0.409 | -2.311±1.089 | 1.14E-10 |
| cg12558519 | 19 | 18748017  | KLHL26      | -3.958±0.419 | -4.579±0.454 | 1.14E-10 |
| cg13266292 | 19 | 1438084   | RPS15       | -1.53±0.273  | -2.125±0.504 | 1.14E-10 |
| cg11653466 | 8  | 38386235  | C8orf86     | -0.37±0.274  | 0.296±0.573  | 1.15E-10 |
| cg21468416 | 9  | 127019914 | NEK6        | -0.774±0.238 | -1.549±0.679 | 1.15E-10 |
| cg16547529 | 11 | 75140681  | KLHL35      | 0.603±0.269  | 1.212±0.518  | 1.15E-10 |
| cg21431536 | 13 | 32313824  | RXFP2       | 1.609±0.29   | 0.834±0.671  | 1.16E-10 |
| cg06638451 | 3  | 58563269  | FAM107A     | -1.706±0.464 | -0.496±1.047 | 1.17E-10 |
| cg25509184 | 7  | 117119382 | CFTR        | -2.157±0.421 | -0.879±1.117 | 1.17E-10 |
| cg07906724 | 8  | 42623946  | CHRNA6      | -0.11±0.423  | -1.227±0.968 | 1.17E-10 |
| cg11873854 | 9  | 139642875 | LCN6        | -0.031±0.282 | -0.671±0.546 | 1.18E-10 |
| cg20691580 | 11 | 116701044 | APOC3       | 2.122±0.33   | 1.355±0.657  | 1.18E-10 |
| cg12622986 | 9  | 135458173 | BARHL1      | -2.636±0.424 | -1.625±0.867 | 1.18E-10 |
| cg23950724 | 12 | 33593177  | SYT10       | -0.869±0.322 | -0.112±0.648 | 1.18E-10 |
| cg14546153 | 20 | 57090315  | APCDD1L-AS1 | -3.176±0.448 | -2.07±0.953  | 1.19E-10 |
| cg18699916 | 6  | 32133929  | EGFL8       | 2.167±0.255  | 2.623±0.369  | 1.20E-10 |

|            |    |           |           |              |              |          |
|------------|----|-----------|-----------|--------------|--------------|----------|
| cg16158874 | 19 | 46095562  | GPR4      | 1.009±0.211  | 0.474±0.463  | 1.20E-10 |
| cg05684195 | 3  | 9920572   | CIDEC     | 1.88±0.195   | 1.105±0.684  | 1.21E-10 |
| cg02309273 | 1  | 38412744  | INPP5B    | -2.895±0.431 | -1.418±1.299 | 1.22E-10 |
| cg24133080 | 1  | 192128253 | RGS18     | -0.165±0.35  | -1.193±0.887 | 1.22E-10 |
| cg01288598 | 6  | 14118227  | CD83      | -3.444±0.339 | -3.925±0.34  | 1.23E-10 |
| cg02493771 | 21 | 31744328  | KRTAP13-2 | -1.176±0.259 | -1.895±0.627 | 1.23E-10 |
| cg02388150 | 8  | 41165699  | SFRP1     | -2.337±0.354 | -1.398±0.815 | 1.24E-10 |
| cg07379574 | 19 | 18724173  | TMEM59L   | -2.868±0.32  | -1.688±1.041 | 1.24E-10 |
| cg23110514 | 1  | 152538888 | LCE3E     | 0.717±0.277  | -0.207±0.813 | 1.25E-10 |
| cg03019000 | 3  | 51704351  | TEX264    | 1.499±0.206  | 0.59±0.805   | 1.25E-10 |
| cg11832722 | 18 | 28623060  | DSC3      | -2.229±0.473 | -0.909±1.151 | 1.25E-10 |
| cg20387706 | 2  | 102097314 | 0         | 2.358±0.219  | 1.811±0.473  | 1.25E-10 |
| cg15642035 | 8  | 139165052 | FAM135B   | 1.475±0.247  | 0.395±0.956  | 1.26E-10 |
| cg05500015 | 11 | 89867819  | NAALAD2   | -3.599±0.448 | -2.004±1.406 | 1.26E-10 |
| cg08475088 | 19 | 56249291  | NLRP9     | 2.906±0.27   | 1.762±1.012  | 1.26E-10 |
| cg26301777 | 13 | 41884544  | NAA16     | 2.69±0.3     | 2.148±0.441  | 1.26E-10 |
| cg02899772 | 16 | 84002599  | NECAB2    | -4.399±0.49  | -2.798±1.408 | 1.28E-10 |
| cg24754277 | 9  | 90114156  | DAPK1     | -1.049±0.411 | -1.769±0.58  | 1.29E-10 |
| cg17471928 | 17 | 37381830  | STAC2     | -3.89±0.329  | -2.23±1.473  | 1.29E-10 |
| cg05208878 | 22 | 22901596  | PRAME     | 0.175±0.207  | -0.325±0.431 | 1.29E-10 |
| cg02579133 | 21 | 46031741  | KRTAP10-8 | 2.094±0.238  | 1.175±0.813  | 1.29E-10 |
| cg19135761 | 1  | 3567214   | WRAP73    | -1.926±0.34  | -0.952±0.851 | 1.30E-10 |
| cg25538571 | 8  | 49502710  | 0         | 0.137±0.449  | -0.968±0.956 | 1.31E-10 |
| cg26771272 | 17 | 18163183  | SMCR7     | 1.754±0.336  | 0.728±0.901  | 1.32E-10 |
| cg18841952 | 6  | 47652462  | GPR111    | 1.277±0.332  | 0.531±0.638  | 1.33E-10 |
| cg08668790 | 19 | 58220662  | ZNF154    | -3.49±0.584  | -1.462±1.79  | 1.34E-10 |
| cg22946150 | 15 | 84116107  | SH3GL3    | -4.38±1.123  | -2.108±1.909 | 1.35E-10 |
| cg17923358 | 7  | 103629618 | RELN      | -3.132±0.446 | -1.261±1.66  | 1.36E-10 |
| cg14414534 | 9  | 100286483 | TMOD1     | 3.901±0.275  | 3.365±0.446  | 1.36E-10 |
| cg10758292 | 8  | 6837381   | DEFA1B    | 2.138±0.365  | 0.969±1.03   | 1.38E-10 |
| cg10149836 | 17 | 29719312  | RAB11FIP4 | -2.306±0.307 | -1.325±0.864 | 1.39E-10 |
| cg08878744 | 1  | 152783674 | LCE1B     | 0.266±0.301  | -0.588±0.749 | 1.42E-10 |
| cg14914852 | 17 | 38024797  | ZBPB2     | 1.269±0.279  | 1.724±0.356  | 1.43E-10 |
| cg21094154 | 13 | 43146121  | TNFSF11   | 2.131±0.231  | 1.036±0.975  | 1.43E-10 |
| cg02409351 | 12 | 85674022  | ALX1      | -3.05±0.406  | -1.636±1.252 | 1.47E-10 |
| cg23182299 | 12 | 113909744 | LHX5      | -3.926±0.615 | -2.284±1.435 | 1.48E-10 |
| cg17398613 | 21 | 43919853  | SLC37A1   | 1.868±0.346  | 2.742±0.76   | 1.49E-10 |
| cg12153542 | 20 | 30063129  | REM1      | -4.476±0.411 | -3.276±1.055 | 1.50E-10 |
| cg15489294 | 5  | 115297853 | AQPEP     | -1.511±0.443 | -0.454±0.915 | 1.53E-10 |
| cg06917325 | 11 | 62783123  | SLC22A8   | 1.538±0.262  | 0.674±0.765  | 1.54E-10 |
| cg12315311 | 19 | 54568443  | VSTM1     | -1.319±0.335 | -2.134±0.706 | 1.54E-10 |
| cg14237152 | 17 | 25957777  | LGALS9    | 1.46±0.207   | 0.931±0.462  | 1.56E-10 |
| cg09827833 | 9  | 27109492  | TEK       | -2.892±0.307 | -1.911±0.869 | 1.60E-10 |
| cg23878206 | 19 | 50431425  | ATF5      | 1.746±0.313  | 1.037±0.61   | 1.60E-10 |
| cg23413307 | 1  | 152747472 | LCE1F     | 1.403±0.374  | 0.263±1.007  | 1.60E-10 |
| cg08290628 | 15 | 68936551  | CORO2B    | 0.926±0.344  | 0.013±0.8    | 1.61E-10 |
| cg03960217 | 1  | 152647777 | LCE2C     | -0.417±0.201 | -1.199±0.697 | 1.66E-10 |
| cg06856528 | 2  | 193059405 | TMEFF2    | -3.341±0.543 | -1.848±1.313 | 1.66E-10 |
| cg04263186 | 4  | 104640489 | TACR3     | -2.313±0.447 | -1.184±0.986 | 1.68E-10 |
| cg10604646 | 1  | 163172649 | RGS5      | 0.232±0.426  | 1.026±0.659  | 1.68E-10 |
| cg26322315 | 7  | 7758995   | RPA3      | 0.742±0.38   | -0.171±0.794 | 1.69E-10 |
| cg05130485 | 2  | 202098257 | CASP8     | -1.543±0.343 | -2.151±0.496 | 1.69E-10 |
| cg26416466 | 15 | 66546708  | MEGF11    | -3.138±0.487 | -1.515±1.442 | 1.69E-10 |
| cg13672342 | 2  | 96930546  | TMEM127   | -1.896±0.221 | -1.088±0.721 | 1.72E-10 |
| cg24697031 | 17 | 74023714  | EVPL      | 0.271±0.249  | -0.327±0.52  | 1.73E-10 |
| cg09816180 | 4  | 72650088  | GC        | 2.294±0.248  | 1.365±0.829  | 1.75E-10 |
| cg08268099 | 9  | 137966584 | OLFM1     | 2.408±0.37   | 1.369±0.916  | 1.76E-10 |
| cg13519373 | 2  | 219030898 | CXCR1     | 0.252±0.286  | -0.683±0.831 | 1.81E-10 |
| cg05589246 | 12 | 54348719  | HOXC12    | -2.949±0.325 | -1.915±0.919 | 1.81E-10 |
| cg15238224 | 6  | 30081408  | TRIM31    | 0.309±0.402  | -0.576±0.763 | 1.81E-10 |
| cg12433691 | 2  | 109065314 | GCC2      | -4.253±0.309 | -4.78±0.427  | 1.82E-10 |
| cg23250700 | 19 | 13056068  | RAD23A    | 2.146±0.295  | 1.587±0.467  | 1.83E-10 |
| cg23941599 | 5  | 114880796 | FEM1C     | -2.404±0.273 | -2.943±0.456 | 1.83E-10 |
| cg18691434 | 7  | 99775425  | STAG3     | -2.072±0.365 | -0.76±1.171  | 1.83E-10 |
| cg22601917 | 1  | 9294274   | H6PD      | -0.772±0.458 | -1.663±0.751 | 1.83E-10 |
| cg05345286 | 6  | 41606641  | MDFI      | -3.014±0.6   | -1.296±1.52  | 1.86E-10 |
| cg17783509 | 4  | 41751001  | PHOX2B    | -2.353±0.222 | -1.381±0.872 | 1.86E-10 |

|            |    |           |             |              |              |          |
|------------|----|-----------|-------------|--------------|--------------|----------|
| cg12869058 | 1  | 94587872  | ABCA4       | 1.143±0.41   | 0.101±0.914  | 1.87E-10 |
| cg22234962 | 1  | 155291297 | RUSC1       | -1.688±0.393 | -0.557±1.001 | 1.87E-10 |
| cg17628717 | 7  | 43351208  | HECW1       | 1.782±0.234  | 0.694±0.977  | 1.87E-10 |
| cg16495265 | 17 | 46671010  | HOXB5       | -3.637±0.349 | -2.186±1.301 | 1.88E-10 |
| cg02998425 | 14 | 70924204  | ADAM21      | 1.725±0.272  | 0.763±0.86   | 1.90E-10 |
| cg01543654 | 17 | 46800639  | HOXB-AS5    | -2.733±0.452 | -1.518±1.072 | 1.90E-10 |
| cg23855093 | 3  | 100328713 | GPR128      | 1.371±0.341  | 0.683±0.585  | 1.91E-10 |
| cg09096031 | 2  | 198540569 | RFTN2       | -0.779±0.38  | -0.039±0.624 | 1.91E-10 |
| cg17423978 | 20 | 1539641   | SIRPD       | 1.843±0.304  | 0.962±0.781  | 1.94E-10 |
| cg04481779 | 6  | 137366125 | IL20RA      | -1.332±0.19  | -1.983±0.582 | 1.99E-10 |
| cg04740359 | 12 | 5603542   | NTF3        | 0.515±0.269  | -0.474±0.886 | 2.01E-10 |
| cg01401376 | 6  | 133563342 | EYA4        | -4.698±0.413 | -3.032±1.496 | 2.02E-10 |
| cg08596000 | 11 | 104035204 | PDGFD       | -2.241±0.275 | -2.957±0.631 | 2.02E-10 |
| cg26024531 | 21 | 37758170  | CHAF1B      | -2.245±0.24  | -2.83±0.513  | 2.03E-10 |
| cg21792432 | 7  | 124538660 | POT1        | 0.657±0.321  | 1.218±0.46   | 2.04E-10 |
| cg24408313 | 18 | 60988465  | 0           | -0.231±0.25  | -0.932±0.621 | 2.05E-10 |
| cg20313722 | 19 | 47248003  | FKRP        | 0.812±0.207  | 1.353±0.477  | 2.05E-10 |
| cg20856834 | 6  | 29342522  | OR12D3      | 0.827±0.252  | -0.091±0.823 | 2.06E-10 |
| cg18450227 | 18 | 48190637  | MAPK4       | 4.457±0.361  | 3.525±0.822  | 2.07E-10 |
| cg22719623 | 6  | 154360732 | OPRM1       | -0.728±0.183 | -0.039±0.617 | 2.07E-10 |
| cg18833140 | 10 | 115312553 | HABP2       | 0.544±0.25   | -0.317±0.771 | 2.08E-10 |
| cg22679120 | 7  | 2353402   | SNX8        | -0.176±0.201 | -0.835±0.589 | 2.08E-10 |
| cg05485060 | 9  | 111776779 | CTNNAL1     | -0.565±0.485 | 0.652±1.07   | 2.09E-10 |
| cg11300809 | 2  | 223288637 | SGPP2       | -0.47±0.269  | -1.05±0.5    | 2.09E-10 |
| cg19591881 | 1  | 208084640 | CD34        | -3.612±0.383 | -2.118±1.342 | 2.09E-10 |
| cg24642468 | 16 | 49407997  | C16orf78    | 0.648±0.301  | -0.109±0.666 | 2.10E-10 |
| cg08768421 | 9  | 74764504  | GDA         | -3.547±0.682 | -1.911±1.433 | 2.14E-10 |
| cg24042452 | 1  | 156305664 | TSACC       | 1.708±0.234  | 2.294±0.516  | 2.17E-10 |
| cg26390526 | 1  | 152299078 | FLG         | 2.48±0.324   | 1.081±1.261  | 2.18E-10 |
| cg07039362 | 16 | 55908870  | CES5A       | 1.982±0.296  | 1.031±0.851  | 2.18E-10 |
| cg25163476 | 11 | 2161586   | IGF2-AS     | -3.199±0.468 | -1.858±1.193 | 2.18E-10 |
| cg08983760 | 13 | 78549582  | EDNRB       | 1.192±0.156  | 0.674±0.464  | 2.19E-10 |
| cg21201572 | 7  | 16844606  | AGR2        | 0.528±0.333  | -0.52±0.937  | 2.19E-10 |
| cg05241571 | 19 | 35981224  | KRTDAP      | 2.534±0.362  | 1.415±1      | 2.20E-10 |
| cg01369413 | 11 | 5530544   | UBQLN3      | 1.901±0.315  | 1.043±0.76   | 2.21E-10 |
| cg12019109 | 7  | 99574383  | AZGP1       | 1.521±0.283  | 0.497±0.921  | 2.21E-10 |
| cg13391235 | 16 | 85316611  | LINC00311   | 1±0.305      | 0.076±0.825  | 2.21E-10 |
| cg26709720 | 21 | 41027960  | B3GALT5     | 2.665±0.363  | 1.392±1.143  | 2.22E-10 |
| cg04454951 | 7  | 49813031  | VWC2        | -3.678±0.37  | -2.062±1.458 | 2.22E-10 |
| cg21922574 | 18 | 70535925  | NETO1       | -5.243±0.643 | -3.562±1.487 | 2.23E-10 |
| cg02939139 | 12 | 113574204 | RASAL1      | -0.745±0.345 | -1.522±0.677 | 2.25E-10 |
| cg05779068 | 6  | 29014046  | OR2W1       | 1.471±0.286  | 0.445±0.923  | 2.26E-10 |
| cg19486673 | 19 | 55085018  | LILRA2      | -0.505±0.273 | -1.452±0.851 | 2.28E-10 |
| cg01894895 | 9  | 75766294  | ANXA1       | 2.496±0.237  | 1.896±0.53   | 2.32E-10 |
| cg20870559 | 12 | 113416518 | OAS2        | -1.35±0.487  | -2.694±1.196 | 2.32E-10 |
| cg08575537 | 7  | 100318626 | EPO         | -1.404±0.691 | 0.049±1.253  | 2.32E-10 |
| cg00495491 | 12 | 26822813  | ITPR2       | 1.405±0.201  | 1.031±0.313  | 2.32E-10 |
| cg23418591 | 20 | 57090317  | APCDD1L-AS1 | -2.714±0.414 | -1.601±0.989 | 2.35E-10 |
| cg00491404 | 1  | 110306591 | EPS8L3      | 1.941±0.312  | 1.251±0.6    | 2.36E-10 |
| cg03364781 | 4  | 113298593 | ALPK1       | 1.406±0.301  | 1.994±0.5    | 2.38E-10 |
| cg09432154 | 3  | 151034669 | GPR87       | -0.024±0.254 | -0.745±0.643 | 2.39E-10 |
| cg26599006 | 22 | 19137371  | GSC2        | -3.877±1.001 | -1.856±1.732 | 2.39E-10 |
| cg13870494 | 9  | 72658358  | MAMDC2      | -0.996±0.374 | -0.084±0.804 | 2.43E-10 |
| cg11584690 | 19 | 42574196  | 0           | -0.983±0.207 | -0.147±0.756 | 2.45E-10 |
| cg11394785 | 5  | 179221090 | LTC4S       | -0.685±0.212 | 0.057±0.669  | 2.47E-10 |
| cg03366382 | 11 | 2182644   | INS         | 2.307±0.281  | 1.558±0.666  | 2.47E-10 |
| cg21771250 | 22 | 40406049  | FAM83F      | -0.736±0.347 | 0.053±0.691  | 2.53E-10 |
| cg04545516 | 20 | 43836061  | SEMG1       | 0.988±0.239  | 0.097±0.806  | 2.55E-10 |
| cg08099701 | 15 | 27160007  | GABRA5      | 1.703±0.264  | 1.116±0.513  | 2.57E-10 |
| cg26850754 | 2  | 87088796  | ANAPC1P1    | -2.677±0.418 | -1.035±1.486 | 2.59E-10 |
| cg06493386 | 8  | 72987797  | TRPA1       | -2.378±0.264 | -1.193±1.075 | 2.59E-10 |
| cg13255629 | 4  | 88752660  | MEPE        | 2.332±0.357  | 1.638±0.592  | 2.62E-10 |
| cg24719601 | 4  | 41750466  | PHOX2B      | -3.321±0.329 | -2.118±1.088 | 2.63E-10 |
| cg03538436 | 12 | 117799370 | NOS1        | -3.501±0.527 | -1.877±1.459 | 2.63E-10 |
| cg21087137 | 12 | 75728469  | GLIPR1L1    | -4.217±0.318 | -2.465±1.593 | 2.63E-10 |
| cg07644368 | 5  | 115152785 | CDO1        | -1.672±0.287 | -0.658±0.915 | 2.64E-10 |
| cg24715245 | 4  | 41258794  | UCHL1-AS1   | -2.968±0.331 | -1.408±1.418 | 2.67E-10 |

|            |    |           |           |              |              |          |
|------------|----|-----------|-----------|--------------|--------------|----------|
| cg24939733 | 11 | 85397684  | CCDC89    | 0.283±0.305  | 0.919±0.55   | 2.68E-10 |
| cg24363955 | 5  | 32788467  | NPR3      | 2.156±0.287  | 1.107±0.949  | 2.68E-10 |
| cg10646402 | 12 | 15475490  | PTPRO     | -4.287±0.929 | -2.396±1.63  | 2.68E-10 |
| cg11828089 | 7  | 71878121  | CALN1     | 2.869±0.294  | 2.053±0.73   | 2.74E-10 |
| cg16612699 | 11 | 124311218 | OR8B8     | 2.251±0.236  | 1.395±0.775  | 2.77E-10 |
| cg07028533 | 7  | 145813439 | CNTNAP2   | -3.034±0.505 | -1.46±1.418  | 2.79E-10 |
| cg21816539 | 21 | 31312328  | GRIK1     | -2.995±0.479 | -1.783±1.077 | 2.79E-10 |
| cg09207718 | 15 | 75041386  | CYP1A2    | 2.368±0.306  | 1.441±0.834  | 2.82E-10 |
| cg05890484 | 5  | 78407552  | BHMT      | -1.412±0.441 | -0.172±1.111 | 2.83E-10 |
| cg03375002 | 7  | 73623876  | LAT2      | 0.529±0.246  | -0.324±0.772 | 2.84E-10 |
| cg27114120 | 20 | 5296302   | PROKR2    | -2.667±0.462 | -1.448±1.089 | 2.90E-10 |
| cg09082287 | 1  | 65730494  | DNAJC6    | -2.097±0.422 | -0.663±1.298 | 2.94E-10 |
| cg06353345 | 11 | 5322976   | OR51B4    | 0.869±0.414  | -0.166±0.92  | 2.98E-10 |
| cg14820573 | 16 | 102121    | POLR3K    | 2.999±0.346  | 2.033±0.867  | 2.98E-10 |
| cg12559031 | 17 | 48046365  | DLX4      | -3.567±0.28  | -4.116±0.471 | 3.00E-10 |
| cg19228118 | 1  | 34631324  | CSMD2     | -3.441±0.427 | -2.211±1.107 | 3.03E-10 |
| cg11797994 | 11 | 44330731  | ALX4      | -0.842±0.256 | -0.403±0.364 | 3.04E-10 |
| cg21233722 | 5  | 169064660 | DOCK2     | -1.742±0.34  | -0.556±1.076 | 3.05E-10 |
| cg09196959 | 6  | 30104440  | TRIM40    | -0.164±0.359 | -1.152±0.886 | 3.06E-10 |
| cg09577651 | 20 | 1600705   | SIRPB1    | -0.164±0.273 | -1.125±0.873 | 3.13E-10 |
| cg03382304 | 21 | 27012176  | JAM2      | -4.165±0.252 | -2.249±1.756 | 3.15E-10 |
| cg24496666 | 1  | 78511979  | GIPC2     | -3.542±0.457 | -1.959±1.438 | 3.17E-10 |
| cg21363706 | 8  | 18066485  | NAT1      | 2.684±0.242  | 1.791±0.813  | 3.17E-10 |
| cg22141781 | 12 | 95397704  | NDUFA12   | -3.606±0.433 | -4.223±0.462 | 3.21E-10 |
| cg26191951 | 14 | 21423466  | RNASE2    | 0.128±0.245  | -0.614±0.671 | 3.21E-10 |
| cg27138018 | 1  | 156589303 | HAPLN2    | -1.864±0.243 | -2.685±0.746 | 3.21E-10 |
| cg03118854 | 22 | 44288155  | PNPLA5    | -2.194±0.326 | -1.335±0.77  | 3.22E-10 |
| cg01587454 | 8  | 88886051  | DCAF4L2   | 2.82±0.276   | 2.28±0.465   | 3.22E-10 |
| cg08430598 | 20 | 23731367  | CST1      | 3.283±0.275  | 2.467±0.737  | 3.22E-10 |
| cg13784855 | 8  | 128806938 | MIR1204   | -4.065±0.39  | -4.722±0.541 | 3.22E-10 |
| cg02786019 | 7  | 142582859 | TRPV6     | 0.959±0.264  | 0.009±0.864  | 3.23E-10 |
| cg15992730 | 12 | 7848093   | GDF3      | -1.757±0.332 | -0.666±0.99  | 3.26E-10 |
| cg12397274 | 6  | 54172183  | TINAG     | 0.327±0.263  | -0.609±0.852 | 3.26E-10 |
| cg16873863 | 11 | 2921176   | SLC22A18  | 0.97±0.373   | 0.084±0.787  | 3.33E-10 |
| cg09542111 | 21 | 31312091  | GRIK1     | -3.949±0.459 | -2.606±1.213 | 3.33E-10 |
| cg14761227 | 7  | 130021088 | CPA1      | 1.503±0.267  | 0.827±0.604  | 3.33E-10 |
| cg07637239 | 10 | 118957259 | KCNK18    | 0.347±0.303  | -0.555±0.815 | 3.33E-10 |
| cg00117172 | 1  | 25255838  | RUNX3     | -3.323±0.453 | -1.138±2.001 | 3.35E-10 |
| cg20890210 | 8  | 73450181  | KCNB2     | -2.479±0.29  | -1.264±1.111 | 3.35E-10 |
| cg08108953 | 20 | 44329941  | WFDC13    | 0.21±0.295   | -0.421±0.553 | 3.36E-10 |
| cg07829804 | 12 | 10325287  | OLR1      | 0.871±0.377  | 0.16±0.608   | 3.37E-10 |
| cg13447818 | 1  | 152298884 | FLG       | 2.014±0.283  | 0.994±0.929  | 3.37E-10 |
| cg07354440 | 1  | 161168889 | ADAMTS4   | 1.662±0.293  | 2.215±0.473  | 3.41E-10 |
| cg26578617 | 4  | 90757533  | LOC644248 | -3.663±0.359 | -2.541±1.018 | 3.42E-10 |
| cg26511321 | 7  | 27196790  | HOXA7     | -1.044±0.241 | 0.015±0.97   | 3.43E-10 |
| cg10807560 | 2  | 40656665  | SLC8A1    | 2.546±0.201  | 1.507±0.954  | 3.43E-10 |
| cg16014085 | 16 | 30406122  | ZNF48     | -1.507±0.452 | -0.453±0.937 | 3.49E-10 |
| cg13319175 | 1  | 19746564  | CAPZB     | 1.218±0.214  | 1.68±0.406   | 3.49E-10 |
| cg11647681 | 5  | 140810161 | PCDHGA12  | -1.241±0.258 | -0.307±0.852 | 3.51E-10 |
| cg26219051 | 22 | 43739629  | SCUBE1    | -2.531±0.388 | -1.492±0.935 | 3.53E-10 |
| cg02876062 | 10 | 14816654  | FAM107B   | 2.776±0.316  | 2.173±0.518  | 3.54E-10 |
| cg19302283 | 4  | 75720398  | BTC       | 2.421±0.243  | 1.621±0.728  | 3.55E-10 |
| cg22253945 | 2  | 105858489 | GPR45     | 1.92±0.371   | 1.072±0.751  | 3.56E-10 |
| cg03240509 | 12 | 4918169   | KCNA6     | -0.769±0.345 | 0.068±0.748  | 3.58E-10 |
| cg25007250 | 7  | 150687712 | NOS3      | 3.599±0.363  | 2.316±1.171  | 3.58E-10 |
| cg04183425 | 6  | 119221279 | ASF1A     | 0.637±0.305  | 1.21±0.491   | 3.60E-10 |
| cg09112782 | 13 | 115047484 | UPF3A     | -2.858±0.345 | -2.187±0.579 | 3.62E-10 |
| cg25481253 | 7  | 141673384 | TAS2R38   | -1.229±0.311 | -1.952±0.643 | 3.64E-10 |
| cg06423920 | 3  | 62359420  | FEZF2     | -3.602±0.379 | -2.499±1     | 3.70E-10 |
| cg05697976 | 12 | 29376483  | FAR2      | 0.504±0.336  | -0.492±0.903 | 3.70E-10 |
| cg22870280 | 15 | 52404029  | BCL2L10   | 2.938±0.176  | 2.611±0.28   | 3.73E-10 |
| cg13589108 | 1  | 177140680 | FAM5B     | -4.487±0.369 | -2.806±1.545 | 3.76E-10 |
| cg05109049 | 17 | 29641333  | EVI2B     | 0.107±0.64   | -1.178±1.119 | 3.81E-10 |
| cg01129459 | 14 | 60386828  | LRRC9     | -2.748±0.368 | -1.831±0.823 | 3.86E-10 |
| cg05590982 | 16 | 28550171  | NUPR1     | -1.534±0.396 | -0.441±0.989 | 3.87E-10 |
| cg23089840 | 21 | 45874886  | LRRC3-AS1 | -1.941±0.353 | -0.883±0.963 | 3.95E-10 |
| cg03014957 | 20 | 29956062  | DEFB118   | 0.549±0.237  | -0.212±0.694 | 3.96E-10 |

|            |    |           |            |              |              |          |
|------------|----|-----------|------------|--------------|--------------|----------|
| cg14696396 | 15 | 83776446  | TM6SF1     | -3.505±0.999 | -1.495±1.754 | 3.98E-10 |
| cg13997435 | 1  | 153538406 | S100A2     | -1.278±0.425 | -2.129±0.742 | 3.99E-10 |
| cg10917619 | 2  | 51255627  | NRXN1      | -0.037±0.268 | -0.773±0.667 | 4.00E-10 |
| cg03238797 | 16 | 77468893  | ADAMTS18   | -4.007±0.87  | -2.084±1.704 | 4.00E-10 |
| cg27081230 | 16 | 50715529  | SNX20      | 0.97±0.382   | 0.138±0.736  | 4.03E-10 |
| cg18221897 | 19 | 55282146  | KIR2DL1    | 1.555±0.254  | 1.005±0.487  | 4.05E-10 |
| cg02732509 | 12 | 58241200  | CTDSP2     | -0.882±0.354 | -1.758±0.787 | 4.05E-10 |
| cg12172720 | 5  | 150019603 | SYNPO      | -0.002±0.29  | 0.583±0.511  | 4.08E-10 |
| cg11819637 | 3  | 184095505 | THPO       | 0.636±0.272  | 0.06±0.508   | 4.09E-10 |
| cg03017475 | 7  | 141674341 | TAS2R38    | 1.04±0.23    | 0.305±0.671  | 4.09E-10 |
| cg12300353 | 4  | 44450358  | KCTD8      | -3.294±0.831 | -1.65±1.432  | 4.10E-10 |
| cg12391048 | 16 | 2770336   | PRSS27     | 2.657±0.388  | 1.414±1.137  | 4.16E-10 |
| cg26164310 | 1  | 99729780  | LPPR4      | -3.448±0.51  | -2.098±1.222 | 4.18E-10 |
| cg15772361 | 18 | 61328223  | SERPINB3   | 4.831±0.219  | 3.614±1.125  | 4.19E-10 |
| cg15006973 | 1  | 35258933  | GJA4       | 1.384±0.365  | 2.183±0.708  | 4.21E-10 |
| cg24645221 | 8  | 57358928  | PENK       | -3.757±0.68  | -2.194±1.395 | 4.28E-10 |
| cg14826456 | 10 | 115804095 | ADRB1      | -1.229±0.478 | -0.334±0.771 | 4.30E-10 |
| cg17676574 | 3  | 126237373 | UROCI      | 1.008±0.145  | 0.507±0.46   | 4.32E-10 |
| cg08678755 | 6  | 131957011 | ENPP3      | 1.803±0.319  | 1.169±0.553  | 4.37E-10 |
| cg18110483 | 5  | 79330959  | THBS4      | -3.737±0.54  | -2.303±1.299 | 4.37E-10 |
| cg19751300 | 18 | 44336399  | ST8SIA5    | -3.291±0.265 | -1.984±1.209 | 4.40E-10 |
| cg22844623 | 1  | 228336130 | GJC2       | 1.343±0.236  | 2.058±0.654  | 4.41E-10 |
| cg04915566 | 21 | 36421472  | RUNX1      | 0.401±0.445  | -1.273±1.541 | 4.44E-10 |
| cg13603551 | 7  | 150549406 | AOC1       | 0.702±0.188  | 0.003±0.643  | 4.54E-10 |
| cg18572014 | 18 | 51038068  | DCC        | 1.649±0.211  | 1.238±0.358  | 4.58E-10 |
| cg11670211 | 11 | 89224288  | NOX4       | -3.931±0.473 | -2.422±1.384 | 4.58E-10 |
| cg20011352 | 8  | 37655269  | GPR124     | -3.384±0.476 | -1.882±1.376 | 4.58E-10 |
| cg26525091 | 19 | 496239    | MADCAM1    | -2.234±0.507 | -1.366±0.729 | 4.66E-10 |
| cg22642718 | 17 | 21318837  | KCNJ18     | 3.913±0.393  | 3.221±0.587  | 4.67E-10 |
| cg14387505 | 16 | 31538946  | AHSP       | 0.643±0.337  | -0.329±0.888 | 4.70E-10 |
| cg14415300 | 1  | 149813944 | HIST2H2AA4 | -4.78±0.481  | -2.752±1.876 | 4.74E-10 |
| cg17271365 | 4  | 164534752 | 42430      | 1.198±0.35   | 0.132±0.977  | 4.81E-10 |
| cg01568736 | 18 | 61441730  | SERPINB7   | 2.827±0.246  | 1.731±1.015  | 4.86E-10 |
| cg06274159 | 4  | 188916867 | ZFP42      | -1.999±0.591 | -0.334±1.521 | 4.87E-10 |
| cg08032971 | 1  | 46972736  | DMBX1      | 1.548±0.316  | 1.988±0.329  | 4.87E-10 |
| cg05989054 | 19 | 1402626   | GAMT       | 0.757±0.29   | -0.206±0.887 | 4.94E-10 |
| cg20792294 | 11 | 2165425   | IGF2-AS    | -3.424±0.497 | -1.797±1.497 | 4.95E-10 |
| cg05250458 | 19 | 9473565   | ZNF177     | -1.583±0.32  | -0.771±0.736 | 4.97E-10 |
| cg24402880 | 4  | 84035837  | PLAC8      | -0.332±0.276 | -0.99±0.593  | 4.97E-10 |
| cg05159188 | 6  | 26240579  | HIST1H4F   | -3.552±0.346 | -2.02±1.421  | 4.99E-10 |
| cg13577076 | 7  | 752456    | PRKAR1B    | -2.625±0.414 | -1.119±1.391 | 5.04E-10 |
| cg15888522 | 3  | 46068932  | XCR1       | 2.301±0.338  | 1.518±0.705  | 5.08E-10 |
| cg16519321 | 11 | 17741243  | MYOD1      | -2.519±0.424 | -1.694±0.722 | 5.10E-10 |
| cg18016365 | 4  | 47033634  | GABRB1     | -3.483±0.376 | -2.272±1.115 | 5.11E-10 |
| cg18441959 | 22 | 22599332  | VPREB1     | -0.89±0.256  | -1.685±0.731 | 5.13E-10 |
| cg06974755 | 9  | 135996931 | RALGDS     | -3.795±0.397 | -4.338±0.401 | 5.13E-10 |
| cg13701109 | 5  | 128795472 | ADAMTS19   | -2.593±0.488 | -1.684±0.788 | 5.13E-10 |
| cg16953612 | 3  | 128185690 | DNAJB8     | 1.516±0.238  | 0.734±0.721  | 5.21E-10 |
| cg19774122 | 6  | 129204622 | LAMA2      | -3.174±0.436 | -1.705±1.355 | 5.21E-10 |
| cg08996413 | 8  | 134072427 | SLA        | 0.022±0.36   | -1.13±1.062  | 5.27E-10 |
| cg11314684 | 1  | 244006288 | AKT3       | -1.029±0.285 | -1.903±0.803 | 5.27E-10 |
| cg07846167 | 1  | 16084758  | FBLIM1     | -0.615±0.406 | -1.596±0.887 | 5.27E-10 |
| cg23248452 | 5  | 9631117   | TAS2R1     | 0.409±0.249  | -0.422±0.767 | 5.30E-10 |
| cg26393983 | 18 | 2571747   | NDC80      | -4.625±0.218 | -4.979±0.293 | 5.35E-10 |
| cg01941619 | 18 | 29770081  | MEP1B      | 1.012±0.251  | 0.411±0.544  | 5.45E-10 |
| cg10605520 | 20 | 60796141  | HRH3       | -4.45±0.399  | -2.623±1.7   | 5.46E-10 |
| cg18592174 | 10 | 50817306  | CHAT       | -3.385±0.44  | -2.146±1.136 | 5.47E-10 |
| cg22061523 | 17 | 76183551  | AFMID      | -2.445±0.379 | -3.078±0.531 | 5.50E-10 |
| cg08097882 | 13 | 79177516  | POU4F1     | -3.807±0.481 | -1.788±1.878 | 5.50E-10 |
| cg15303841 | 22 | 29833804  | RFPL1      | 2.154±0.244  | 1.287±0.803  | 5.51E-10 |
| cg01405107 | 17 | 46671635  | HOXB5      | -2.386±0.432 | -1.301±0.987 | 5.55E-10 |
| cg00579393 | 2  | 79316004  | REG1B      | 2.257±0.341  | 1.17±1.004   | 5.61E-10 |
| cg15602809 | 1  | 239792464 | CHRM3      | 0.467±0.136  | 0.257±0.171  | 5.61E-10 |
| cg01353448 | 7  | 31726912  | PPP1R17    | -0.179±0.237 | 0.562±0.684  | 5.62E-10 |
| cg14175438 | 7  | 121036729 | FAM3C      | -2.661±0.246 | -3.199±0.482 | 5.63E-10 |
| cg14127336 | 14 | 96180319  | TCL1A      | 2.671±0.471  | 1.694±0.868  | 5.63E-10 |
| cg07080358 | 2  | 68546507  | CNRIP1     | -4.845±0.643 | -2.505±2.171 | 5.68E-10 |

|            |    |           |            |              |              |          |
|------------|----|-----------|------------|--------------|--------------|----------|
| cg19358442 | 11 | 44325687  | ALX4       | -3.14±0.658  | -1.898±1.083 | 5.78E-10 |
| cg17266238 | 21 | 29385056  | LINC00314  | 2.169±0.351  | 1.509±0.576  | 5.84E-10 |
| cg00916635 | 1  | 114414312 | PTPN22     | 0.825±0.493  | -0.394±1.109 | 5.84E-10 |
| cg20676475 | 1  | 152552494 | LCE3D      | 1.509±0.278  | 0.447±0.988  | 5.87E-10 |
| cg11698653 | 4  | 177190191 | ASB5       | 1.339±0.286  | 0.603±0.673  | 5.88E-10 |
| cg20387341 | 5  | 44389282  | FGF10      | -2.856±0.353 | -1.632±1.136 | 5.88E-10 |
| cg03593419 | 4  | 46995474  | GABRA4     | -4.276±0.594 | -2.899±1.245 | 5.91E-10 |
| cg19339848 | 6  | 74170937  | MTO1       | -1.987±0.531 | -2.856±0.725 | 5.93E-10 |
| cg14289985 | 19 | 57018848  | ZNF471     | -3.542±0.591 | -1.995±1.416 | 5.98E-10 |
| cg19392109 | 15 | 39542693  | C15orf54   | 1.894±0.277  | 1.126±0.706  | 6.05E-10 |
| cg05774801 | 4  | 154709756 | SFRP2      | -3.532±0.328 | -2.155±1.285 | 6.05E-10 |
| cg13745346 | 16 | 89044523  | CBFA2T3    | 1.023±0.326  | 0.146±0.805  | 6.06E-10 |
| cg25928579 | 17 | 46692534  | HOXB8      | -3.723±0.414 | -2.43±1.196  | 6.07E-10 |
| cg18292394 | 10 | 82049450  | MAT1A      | -0.82±0.285  | -1.591±0.707 | 6.07E-10 |
| cg12108912 | 2  | 120435949 | TMEM177    | 1.426±0.299  | 0.377±0.976  | 6.13E-10 |
| cg02358761 | 2  | 197036780 | STK17B     | -3.893±0.367 | -4.425±0.417 | 6.18E-10 |
| cg11304234 | 11 | 112034801 | IL18       | -1.867±0.307 | -2.58±0.646  | 6.20E-10 |
| cg25978208 | 15 | 25093244  | SNRPN      | 0.535±0.235  | 1.094±0.508  | 6.21E-10 |
| cg25203856 | 11 | 7059980   | NLRP14     | 1.192±0.161  | 0.376±0.764  | 6.26E-10 |
| cg07823492 | 17 | 46608099  | HOXB1      | 1.267±0.392  | 2.726±1.359  | 6.26E-10 |
| cg20070090 | 1  | 153363489 | S100A8     | 0.126±0.25   | -0.661±0.729 | 6.29E-10 |
| cg19528976 | 7  | 100823280 | NAT16      | -3.802±0.484 | -2.221±1.468 | 6.42E-10 |
| cg10784030 | 1  | 38412688  | INPP5B     | -2.745±0.448 | -1.261±1.379 | 6.45E-10 |
| cg15062535 | 19 | 52847933  | ZNF610     | 2.229±0.334  | 1.468±0.689  | 6.45E-10 |
| cg05071677 | 5  | 180581950 | OR2V2      | 1.883±0.266  | 1.193±0.633  | 6.53E-10 |
| cg10832166 | 15 | 25296628  | SNORD116-1 | 2±0.268      | 1.339±0.604  | 6.58E-10 |
| cg03998348 | 15 | 38227285  | TMCO5A     | 2.005±0.343  | 1.082±0.849  | 6.59E-10 |
| cg07136161 | 9  | 105758091 | CYLC2      | 1.617±0.277  | 0.879±0.679  | 6.64E-10 |
| cg12514620 | 1  | 54871858  | SSBP3      | -4.14±0.546  | -2.97±1.051  | 6.68E-10 |
| cg25214366 | 8  | 7287673   | DEFB103B   | 1.517±0.261  | 0.639±0.819  | 6.83E-10 |
| cg09847584 | 12 | 131002386 | RIMBP2     | 2.979±0.208  | 2±0.919      | 6.88E-10 |
| cg04527363 | 3  | 6902337   | GRM7       | -3.071±0.309 | -2.174±0.831 | 6.91E-10 |
| cg20202438 | 1  | 11907986  | NPPA       | 0.733±0.196  | 1.173±0.398  | 6.95E-10 |
| cg11038843 | 11 | 134281391 | B3GAT1     | -2.51±0.221  | -1.447±0.998 | 7.03E-10 |
| cg24109894 | 1  | 36108212  | PSMB2      | -0.136±0.234 | -0.611±0.424 | 7.09E-10 |
| cg18967533 | 19 | 51472725  | KLK6       | 1.114±0.291  | 0.297±0.756  | 7.10E-10 |
| cg09768051 | 1  | 70224402  | LRRC7      | 1.981±0.388  | 1.095±0.804  | 7.12E-10 |
| cg04391111 | 1  | 3568004   | TP73       | -3.302±0.539 | -1.978±1.212 | 7.13E-10 |
| cg18680834 | 19 | 30863349  | ZNF536     | -0.432±0.255 | -1.213±0.726 | 7.14E-10 |
| cg23239396 | 7  | 93203695  | CALCR      | -2.944±0.36  | -1.813±1.052 | 7.20E-10 |
| cg22511262 | 11 | 32455192  | WT1        | -3.38±0.322  | -2.561±0.753 | 7.25E-10 |
| cg09214254 | 6  | 168841455 | SMOC2      | -2.555±0.401 | -1.509±0.963 | 7.26E-10 |
| cg24169915 | 14 | 99177987  | C14orf177  | -1.714±0.298 | -2.622±0.845 | 7.29E-10 |
| cg25465406 | 17 | 7906098   | GUCY2D     | -3.787±0.44  | -2.207±1.478 | 7.29E-10 |
| cg07816074 | 4  | 8201560   | SH3TC1     | 0.048±0.219  | -0.541±0.544 | 7.30E-10 |
| cg23909343 | 1  | 212457915 | PPP2R5A    | -2.89±0.325  | -3.419±0.444 | 7.31E-10 |
| cg19620294 | 8  | 119964729 | TNFRSF11B  | -1.997±0.312 | -0.992±0.937 | 7.35E-10 |
| cg06276653 | 8  | 139164635 | FAM135B    | 2.279±0.23   | 1.373±0.85   | 7.36E-10 |
| cg09453312 | 5  | 156608118 | ITK        | 0.936±0.28   | 0.171±0.707  | 7.36E-10 |
| cg14654926 | 5  | 44388688  | FGF10      | -3.064±0.385 | -1.991±0.994 | 7.37E-10 |
| cg02833725 | 1  | 156696768 | ISG20L2    | 0.512±0.267  | -0.218±0.675 | 7.49E-10 |
| cg20399252 | 13 | 50266227  | EBPL       | 3.399±0.431  | 1.888±1.415  | 7.57E-10 |
| cg01753375 | 2  | 74607600  | DCTN1      | -0.514±0.206 | 0.043±0.515  | 7.63E-10 |
| cg16777782 | 16 | 82671333  | CDH13      | 4.247±0.262  | 3.076±1.103  | 7.68E-10 |
| cg05246522 | 17 | 25798973  | KSR1       | 0.952±0.457  | -0.302±1.161 | 7.68E-10 |
| cg12552392 | 20 | 34288511  | NFS1       | 1.356±0.235  | 0.729±0.579  | 7.75E-10 |
| cg17183546 | 4  | 4387879   | NSG1       | -3.418±0.437 | -2.167±1.162 | 7.82E-10 |
| cg06811800 | 13 | 114312105 | ATP4B      | 2.191±0.274  | 1.383±0.752  | 7.99E-10 |
| cg06585690 | 4  | 71262957  | PROL1      | 0.035±0.31   | -0.487±0.445 | 8.02E-10 |
| cg19220825 | 12 | 50353951  | AQP5       | -1.803±0.297 | -2.425±0.561 | 8.02E-10 |
| cg25145670 | 17 | 46655164  | HOXB4      | -2.464±0.347 | -1.058±1.323 | 8.03E-10 |
| cg09088576 | 1  | 36947785  | CSF3R      | -1.5±0.35    | -0.331±1.095 | 8.05E-10 |
| cg16158681 | 16 | 56623109  | MT3        | -2.726±0.37  | -1.42±1.226  | 8.06E-10 |
| cg19593572 | 16 | 22308486  | POLR3E     | -3.547±0.622 | -2.582±0.796 | 8.09E-10 |
| cg09081544 | 3  | 124652790 | MUC13      | 1.934±0.273  | 0.916±0.957  | 8.17E-10 |
| cg26656135 | 6  | 133562774 | EYA4       | -4.066±0.752 | -2.081±1.838 | 8.26E-10 |
| cg17277529 | 11 | 69633959  | FGF3       | -4.275±0.434 | -3.012±1.177 | 8.34E-10 |

|            |    |           |             |              |              |          |
|------------|----|-----------|-------------|--------------|--------------|----------|
| cg10741760 | 1  | 19992024  | HTR6        | -2.931±0.409 | -1.68±1.169  | 8.35E-10 |
| cg27652350 | 15 | 101420989 | ALDH1A3     | -2.507±0.474 | -1.106±1.307 | 8.36E-10 |
| cg19965810 | 2  | 163695793 | KCNH7       | -2.911±0.563 | -1.647±1.154 | 8.37E-10 |
| cg25033993 | 16 | 31022372  | STX1B       | -2.461±0.266 | -1.513±0.892 | 8.41E-10 |
| cg05441133 | 10 | 48416891  | GDF2        | 0.911±0.394  | 2.239±1.246  | 8.43E-10 |
| cg22898761 | 2  | 202148976 | CASP8       | 1.381±0.213  | 0.986±0.348  | 8.47E-10 |
| cg12682367 | 13 | 24523698  | ANKRD20A19P | 0.962±0.337  | 0.113±0.785  | 8.48E-10 |
| cg00174901 | 19 | 709889    | PALM        | -1.918±0.527 | -1.023±0.769 | 8.48E-10 |
| cg22674717 | 16 | 51185394  | SALL1       | -4.355±0.96  | -2.559±1.588 | 8.58E-10 |
| cg01424107 | 13 | 28543113  | CDX2        | -4.345±0.58  | -2.645±1.587 | 8.59E-10 |
| cg03555203 | 19 | 31770188  | TSHZ3       | 4.408±0.252  | 3.659±0.7    | 8.60E-10 |
| cg05839235 | 5  | 32712237  | NPR3        | -3.018±0.566 | -1.612±1.297 | 8.61E-10 |
| cg25336198 | 11 | 2182618   | INS-IGF2    | 0.444±0.249  | -0.273±0.668 | 8.65E-10 |
| cg26608199 | 13 | 113776126 | F10         | 2.375±0.216  | 1.46±0.865   | 8.78E-10 |
| cg04471507 | 1  | 26233376  | STMN1       | -0.43±0.345  | -1.207±0.71  | 8.86E-10 |
| cg00041575 | 11 | 2322741   | C11orf21    | 0.279±0.419  | -0.758±0.958 | 8.87E-10 |
| cg24992780 | 19 | 14911551  | OR7C1       | 2.553±0.201  | 1.903±0.61   | 8.91E-10 |
| cg22325703 | 11 | 94134235  | GPR83       | -3.937±0.369 | -2.506±1.351 | 8.94E-10 |
| cg19018097 | 11 | 65601328  | SNX32       | -4.996±0.851 | -2.739±2.097 | 8.99E-10 |
| cg08045570 | 6  | 1390502   | FOXF2       | -4.367±1.23  | -2.38±1.681  | 9.08E-10 |
| cg00321478 | 1  | 197238398 | CRB1        | 1.535±0.341  | 2.241±0.639  | 9.09E-10 |
| cg13958614 | 5  | 72744196  | FOXD1       | -1.95±0.47   | -0.692±1.17  | 9.12E-10 |
| cg13217373 | 6  | 167275395 | RPS6KA2     | -0.516±0.356 | 0.235±0.681  | 9.19E-10 |
| cg22979433 | 5  | 80528609  | CKMT2       | 0.607±0.263  | 1.123±0.462  | 9.19E-10 |
| cg13882988 | 10 | 54531345  | MBL2        | 1.804±0.302  | 0.902±0.845  | 9.26E-10 |
| cg20587168 | 19 | 8808829   | ACTL9       | -1.047±0.362 | -0.443±0.518 | 9.56E-10 |
| cg04456238 | 11 | 32450104  | WT1         | -1.101±0.532 | -0.159±0.824 | 9.65E-10 |
| cg16791686 | 19 | 48249014  | GLTSCR2     | 1.219±0.328  | 0.536±0.619  | 9.68E-10 |
| cg25259754 | 1  | 157670220 | FCRL3       | -0.22±0.249  | -1.257±0.984 | 9.79E-10 |
| cg26389232 | 15 | 25296693  | SNORD116-1  | 3.056±0.273  | 2.322±0.684  | 9.81E-10 |
| cg09418321 | 12 | 4699618   | DYRK4       | 0.41±0.261   | -0.609±0.965 | 9.82E-10 |
| cg01883966 | 6  | 31938886  | STK19       | 3.133±0.377  | 1.982±1.081  | 9.86E-10 |
| cg05420896 | 18 | 49867488  | DCC         | -3.136±0.419 | -2.263±0.793 | 9.90E-10 |
| cg24626923 | 2  | 68873205  | PROKR1      | 3.546±0.202  | 2.712±0.791  | 9.92E-10 |
| cg18766755 | 1  | 153029939 | SPRR2A      | 1.234±0.31   | 0.34±0.837   | 9.93E-10 |
| cg14521746 | 11 | 77185492  | PAK1        | -3.25±0.234  | -3.569±0.246 | 9.93E-10 |
| cg04355435 | 1  | 43736290  | TMEM125     | -2.915±0.375 | -3.577±0.581 | 1.01E-09 |
| cg20377955 | 7  | 20827825  | SP8         | -1.756±0.195 | -0.917±0.798 | 1.01E-09 |
| cg06509940 | 3  | 119278914 | CD80        | 2.66±0.422   | 1.814±0.753  | 1.02E-09 |
| cg12878228 | 7  | 142456124 | PRSS1       | 0.605±0.181  | -0.225±0.789 | 1.04E-09 |
| cg19464944 | 1  | 149754000 | FCGR1A      | 0.676±0.253  | -0.282±0.909 | 1.05E-09 |
| cg01643580 | 2  | 26916399  | KCNK3       | -1.938±0.448 | -0.98±0.875  | 1.05E-09 |
| cg17709873 | 6  | 31540456  | LTA         | 1.324±0.399  | 0.587±0.654  | 1.05E-09 |
| cg12741420 | 6  | 392131    | IRF4        | -4.19±0.461  | -2.493±1.61  | 1.05E-09 |
| cg24546942 | 18 | 61310626  | SERPINB4    | 1.579±0.205  | 0.892±0.65   | 1.06E-09 |
| cg24673765 | 19 | 36247869  | HSPB6       | -1.542±0.393 | -0.652±0.82  | 1.06E-09 |
| cg22478614 | 8  | 7752260   | DEFB4A      | 1.026±0.264  | 0.28±0.7     | 1.07E-09 |
| cg26833602 | 9  | 95821549  | SUSD3       | -2.436±0.374 | -3.234±0.729 | 1.07E-09 |
| cg08640498 | 12 | 57828515  | INHBC       | -0.738±0.202 | -0.195±0.508 | 1.07E-09 |
| cg24611092 | 2  | 172778432 | HAT1        | 2.37±0.266   | 1.74±0.583   | 1.12E-09 |
| cg04902405 | 1  | 203768517 | ZBED6       | 0.966±0.314  | 1.462±0.419  | 1.12E-09 |
| cg07485588 | 9  | 70429213  | FOXD4L4     | -0.169±0.2   | 0.27±0.404   | 1.12E-09 |
| cg20034100 | 6  | 125304496 | RNF217      | 2.005±0.328  | 1.32±0.625   | 1.13E-09 |
| cg23801057 | 12 | 121569969 | P2RX7       | 0.776±0.376  | 1.489±0.639  | 1.14E-09 |
| cg17692403 | 20 | 42964959  | R3HDM1      | -2.869±0.283 | -1.976±0.845 | 1.14E-09 |
| cg00195561 | 11 | 46408584  | CHRM4       | 2.562±0.175  | 1.709±0.816  | 1.15E-09 |
| cg19005368 | 11 | 32851950  | PRRG4       | -2.833±0.392 | -3.617±0.71  | 1.16E-09 |
| cg02972551 | 2  | 86668068  | KDM3A       | -3.938±0.201 | -4.202±0.197 | 1.16E-09 |
| cg05512099 | 19 | 30155866  | PLEKHF1     | -0.722±0.277 | -1.608±0.839 | 1.17E-09 |
| cg02982734 | 15 | 23891048  | MAGEL2      | 1.864±0.243  | 1.291±0.532  | 1.19E-09 |
| cg00237010 | 12 | 772861    | NINJ2       | 1.323±0.31   | 0.701±0.566  | 1.20E-09 |
| cg09532664 | 5  | 9631216   | TAS2R1      | 2.198±0.447  | 1.145±0.966  | 1.20E-09 |
| cg03082060 | 1  | 236680224 | LGALS8      | -0.102±0.232 | -0.781±0.641 | 1.20E-09 |
| cg07621046 | 10 | 118429658 | C10orf82    | -1.48±0.445  | -0.384±1.023 | 1.20E-09 |
| cg14385738 | 1  | 114414340 | PTPN22      | 0.573±0.456  | -0.734±1.234 | 1.21E-09 |
| cg23129478 | 18 | 44337922  | ST8SIA5     | -4.387±0.451 | -2.78±1.531  | 1.21E-09 |
| cg26986236 | 19 | 34855715  | GPI         | -2.623±0.292 | -3.237±0.562 | 1.22E-09 |

|            |    |           |                 |              |              |          |
|------------|----|-----------|-----------------|--------------|--------------|----------|
| cg18221862 | 2  | 193059230 | <i>TMEFF2</i>   | -3.444±0.329 | -2.202±1.185 | 1.23E-09 |
| cg02064106 | 6  | 165722858 | <i>C6orf118</i> | -3.601±0.656 | -2.24±1.245  | 1.23E-09 |
| cg10997248 | 11 | 117699019 | <i>FXVD2</i>    | 0.786±0.266  | 0.16±0.582   | 1.24E-09 |
| cg26628847 | 7  | 142829304 | <i>PIP</i>      | 0.239±0.24   | -0.496±0.696 | 1.25E-09 |
| cg11377136 | 22 | 46658960  | <i>PKDREJ</i>   | -1.177±0.628 | -0.13±0.909  | 1.25E-09 |
| cg24516901 | 2  | 225266801 | <i>FAM124B</i>  | -1.929±0.403 | -0.909±0.956 | 1.25E-09 |
| cg05376954 | 19 | 52255673  | <i>FPR1</i>     | -0.306±0.29  | -0.993±0.623 | 1.26E-09 |
| cg22335801 | 1  | 1149091   | <i>TNFRSF4</i>  | -1.313±0.314 | -2.171±0.808 | 1.26E-09 |
| cg16418329 | 4  | 71200751  | <i>CABS1</i>    | 1.921±0.202  | 1.084±0.801  | 1.27E-09 |
| cg05798712 | 6  | 123100907 | <i>FABP7</i>    | 1.393±0.248  | 0.918±0.428  | 1.27E-09 |
| cg27336379 | 1  | 76078230  | <i>SLC44A5</i>  | 2.223±0.278  | 1.573±0.605  | 1.27E-09 |
| cg15452573 | 4  | 90758843  | <i>SNCA</i>     | -4.725±0.458 | -2.931±1.715 | 1.27E-09 |
| cg18971054 | 7  | 141695759 | <i>MGAM</i>     | 2.27±0.317   | 1.432±0.789  | 1.28E-09 |
| cg20011134 | 6  | 110736422 | <i>DDO</i>      | 0.208±0.259  | 0.821±0.571  | 1.29E-09 |
| cg15811427 | 19 | 52254222  | <i>FPR1</i>     | 0.428±0.279  | -0.354±0.73  | 1.29E-09 |
| cg05040360 | 11 | 60102449  | <i>MS4A6E</i>   | 1.872±0.248  | 1.033±0.799  | 1.29E-09 |
| cg25002911 | 13 | 49039986  | <i>RB1</i>      | 1.748±0.242  | 1.316±0.384  | 1.31E-09 |
| cg00848728 | 1  | 58716018  | <i>DAB1</i>     | -4.792±0.661 | -2.863±1.828 | 1.32E-09 |
| cg03506489 | 11 | 30038788  | <i>KCNA4</i>    | -3.041±0.476 | -1.923±1.042 | 1.32E-09 |
| cg03875678 | 14 | 25103546  | <i>GZMB</i>     | -0.501±0.344 | -1.326±0.77  | 1.32E-09 |
| cg02334775 | 15 | 89182676  | <i>ISG20</i>    | -0.428±0.348 | -1.166±0.679 | 1.33E-09 |
| cg22117143 | 9  | 13251431  | <i>MPDZ</i>     | 2.906±0.218  | 2.418±0.453  | 1.33E-09 |
| cg27433088 | 4  | 174089019 | <i>GALNT7</i>   | -1.676±0.305 | -2.349±0.622 | 1.34E-09 |
| cg04457979 | 11 | 2890647   | <i>KCNQ1DN</i>  | -1.138±0.466 | -0.101±0.961 | 1.34E-09 |
| cg06714705 | 11 | 7506940   | <i>OLFML1</i>   | 0.716±0.34   | 1.386±0.609  | 1.34E-09 |
| cg13206017 | 3  | 187388225 | <i>SST</i>      | -2.74±0.373  | -1.68±1.004  | 1.34E-09 |
| cg12718562 | 15 | 74165861  | <i>TBC1D21</i>  | 2.143±0.325  | 1.249±0.845  | 1.35E-09 |
| cg04517429 | 4  | 155413618 | <i>DCHS2</i>    | -2.482±0.302 | -1.729±0.707 | 1.36E-09 |
| cg00875272 | 1  | 47695321  | <i>TAL1</i>     | -3.402±0.292 | -2.393±0.964 | 1.38E-09 |
| cg01324261 | 4  | 174320378 | <i>SCRGI</i>    | 0.667±0.281  | 1.274±0.561  | 1.38E-09 |
| cg16571399 | 15 | 62939540  | <i>TLN2</i>     | 3.723±0.206  | 3.006±0.686  | 1.38E-09 |
| cg01714932 | 12 | 9360854   | <i>PZP</i>      | 2.09±0.323   | 1.318±0.722  | 1.39E-09 |
| cg26055770 | 3  | 73674070  | <i>PDZRN3</i>   | -2.38±0.593  | -1.204±1.072 | 1.39E-09 |
| cg12810837 | 12 | 9822287   | <i>CLEC2D</i>   | 0.818±0.41   | 0.035±0.709  | 1.41E-09 |
| cg09147827 | 14 | 94789853  | <i>SERPINA6</i> | 0.344±0.256  | -0.288±0.593 | 1.42E-09 |
| cg06757810 | 8  | 87756528  | <i>CNGB3</i>    | 1.596±0.406  | 0.809±0.715  | 1.42E-09 |
| cg12867448 | 9  | 131217480 | <i>ODF2</i>     | 2.273±0.278  | 1.423±0.809  | 1.43E-09 |
| cg26862286 | 2  | 232330307 | <i>NCL</i>      | 3.021±0.309  | 1.935±1.039  | 1.44E-09 |
| cg06918467 | 6  | 137815539 | <i>OLIG3</i>    | -2.882±0.265 | -1.857±0.984 | 1.44E-09 |
| cg22678136 | 15 | 25093521  | <i>SNRPN</i>    | 0.077±0.538  | 0.993±0.805  | 1.45E-09 |
| cg01404615 | 4  | 107958572 | <i>DKK2</i>     | -3.732±0.392 | -2.478±1.197 | 1.45E-09 |
| cg04448487 | 20 | 42875777  | <i>GDAP1L1</i>  | -2.733±0.388 | -1.226±1.448 | 1.45E-09 |
| cg02599464 | 6  | 27107097  | <i>HIST1H4I</i> | -2.902±0.589 | -1.29±1.527  | 1.47E-09 |
| cg17778120 | 3  | 139195319 | <i>RBP2</i>     | 2.733±0.311  | 1.897±0.791  | 1.47E-09 |
| cg13121699 | 2  | 185462397 | <i>ZNF804A</i>  | -3.895±0.288 | -2.422±1.422 | 1.48E-09 |
| cg16319578 | 14 | 65007512  | <i>HSPA2</i>    | -4.603±0.481 | -2.911±1.624 | 1.51E-09 |
| cg21176048 | 3  | 179755235 | <i>PEX5L</i>    | -4.678±0.491 | -2.877±1.73  | 1.51E-09 |
| cg15552238 | 19 | 14785749  | <i>EMR3</i>     | -0.441±0.257 | -1.227±0.75  | 1.51E-09 |
| cg06357925 | 12 | 15475331  | <i>PTPRO</i>    | -4.107±0.584 | -2.532±1.493 | 1.51E-09 |
| cg00290506 | 1  | 224804226 | <i>CNIH3</i>    | -4.597±0.901 | -2.612±1.846 | 1.52E-09 |
| cg10634551 | 3  | 178254242 | <i>KCNMB2</i>   | -2.909±0.391 | -1.949±0.903 | 1.52E-09 |
| cg02332492 | 9  | 139840678 | <i>C8G</i>      | 2.407±0.319  | 1.667±0.693  | 1.53E-09 |
| cg09952204 | 5  | 80256664  | <i>RASGRF2</i>  | -4.372±1.155 | -2.362±1.785 | 1.54E-09 |
| cg04514469 | 14 | 95942666  | <i>SYNE3</i>    | 1.92±0.286   | 0.955±0.925  | 1.55E-09 |
| cg08649013 | 4  | 10042198  | <i>SLC2A9</i>   | 2.269±0.315  | 1.483±0.74   | 1.55E-09 |
| cg16232126 | 2  | 108603005 | <i>SLC5A7</i>   | -2.599±0.652 | -1.224±1.271 | 1.55E-09 |
| cg11308639 | 2  | 69098272  | <i>BMP10</i>    | 1.332±0.318  | 0.544±0.743  | 1.58E-09 |
| cg02005755 | 7  | 135412849 | <i>SLC13A4</i>  | 3.111±0.304  | 2.333±0.735  | 1.59E-09 |
| cg07073964 | 19 | 698371    | <i>0</i>        | 1.649±0.35   | 0.928±0.665  | 1.59E-09 |
| cg13948987 | 6  | 55039259  | <i>HCRTR2</i>   | -4.039±0.695 | -2.6±1.328   | 1.60E-09 |
| cg01260219 | 11 | 130299333 | <i>ADAMTS8</i>  | 0.541±0.201  | -0.181±0.695 | 1.60E-09 |
| cg08432727 | 2  | 5831722   | <i>SOX11</i>    | -2.431±0.647 | -1.211±1.108 | 1.60E-09 |
| cg13297960 | 21 | 22370237  | <i>NCAM2</i>    | -3.296±0.53  | -2.093±1.125 | 1.62E-09 |
| cg01589580 | 18 | 77440800  | <i>CTDP1</i>    | -1.442±0.345 | -2.406±0.917 | 1.62E-09 |
| cg15059932 | 18 | 74535233  | <i>ZNF236</i>   | -4.174±0.412 | -4.806±0.536 | 1.62E-09 |
| cg07629017 | 8  | 53851613  | <i>NPBWR1</i>   | -3.9±0.316   | -2.681±1.175 | 1.63E-09 |
| cg14036856 | 1  | 43751563  | <i>C1orf210</i> | 0.408±0.243  | -0.373±0.749 | 1.63E-09 |

|            |    |           |          |              |              |          |
|------------|----|-----------|----------|--------------|--------------|----------|
| cg03387723 | 1  | 41708464  | SCMH1    | 2.052±0.418  | 1.168±0.82   | 1.63E-09 |
| cg19629292 | 3  | 62358980  | FEZF2    | -3.839±0.478 | -2.506±1.27  | 1.63E-09 |
| cg04505023 | 1  | 152956186 | SPRR1A   | 0.937±0.262  | 0.031±0.871  | 1.64E-09 |
| cg16652063 | 17 | 6616653   | SLC13A5  | -3.023±0.385 | -1.787±1.187 | 1.66E-09 |
| cg20822579 | 14 | 24809073  | RIPK3    | -2.294±0.456 | -3.347±0.988 | 1.66E-09 |
| cg26453588 | 22 | 43506021  | BIK      | -0.497±0.261 | 0.249±0.712  | 1.67E-09 |
| cg21458907 | 3  | 62860802  | CADPS    | -3.851±0.616 | -2.242±1.527 | 1.67E-09 |
| cg18794577 | 9  | 104501030 | GRIN3A   | -3.425±0.513 | -1.79±1.569  | 1.67E-09 |
| cg27442349 | 19 | 39389219  | NFKBIB   | 1.184±0.347  | 1.698±0.43   | 1.68E-09 |
| cg13144783 | 3  | 46249795  | CCR1     | -0.159±0.309 | -0.944±0.744 | 1.69E-09 |
| cg04034767 | 12 | 52400907  | GRASP    | -3.618±0.405 | -1.599±1.958 | 1.70E-09 |
| cg17463527 | 20 | 42187837  | SGK2     | 1.576±0.22   | 0.588±0.957  | 1.71E-09 |
| cg16639595 | 7  | 87856984  | SRI      | 1.045±0.314  | 0.054±0.951  | 1.71E-09 |
| cg10910775 | 17 | 45266517  | CDC27    | 0.949±0.146  | 0.71±0.208   | 1.71E-09 |
| cg04774694 | 16 | 68033270  | DPEP2    | 1.395±0.187  | 1.091±0.264  | 1.72E-09 |
| cg07873488 | 7  | 100662570 | MUC17    | 2.288±0.351  | 1.432±0.809  | 1.73E-09 |
| cg20910746 | 11 | 27062416  | BBOX1    | 0.635±0.276  | -0.229±0.829 | 1.73E-09 |
| cg20795401 | 2  | 173291908 | ITGA6    | -1.333±0.222 | -1.959±0.597 | 1.73E-09 |
| cg18279742 | 16 | 2015703   | RPS2     | -0.552±0.254 | -1.209±0.624 | 1.75E-09 |
| cg21500966 | 11 | 89867976  | NAALAD2  | -4.185±0.524 | -2.95±1.164  | 1.76E-09 |
| cg09314766 | 8  | 39695697  | ADAM2    | 3.266±0.191  | 2.787±0.454  | 1.76E-09 |
| cg18414381 | 11 | 34642885  | EHF      | -0.147±0.259 | -0.944±0.765 | 1.78E-09 |
| cg19433435 | 11 | 125366590 | FEZ1     | -0.066±0.264 | 0.585±0.616  | 1.79E-09 |
| cg02909790 | 6  | 26271587  | HIST1H3G | -3.228±0.303 | -1.553±1.629 | 1.79E-09 |
| cg02055963 | 13 | 28543520  | CDX2     | -3.321±0.484 | -1.912±1.349 | 1.79E-09 |
| cg04884908 | 2  | 72374840  | CYP26B1  | -2.155±0.471 | -1.016±1.077 | 1.80E-09 |
| cg13928961 | 12 | 53012009  | KRT73    | 3.463±0.275  | 2.068±1.356  | 1.80E-09 |
| cg19226099 | 20 | 54824085  | MC3R     | 1.321±0.246  | 0.672±0.619  | 1.81E-09 |
| cg13652336 | 8  | 68864012  | PREX2    | -3.018±0.471 | -1.775±1.185 | 1.83E-09 |
| cg24229963 | 8  | 82633648  | ZFAND1   | -4.411±0.348 | -4.836±0.297 | 1.83E-09 |
| cg16504670 | 16 | 90014253  | DEF8     | 1.887±0.353  | 1.076±0.763  | 1.84E-09 |
| cg02244695 | 7  | 150497346 | TMEM176B | -2.992±0.568 | -1.776±1.135 | 1.85E-09 |
| cg15774153 | 11 | 69518773  | FGF19    | -3.837±0.889 | -2.302±1.37  | 1.86E-09 |
| cg25174591 | 17 | 11501557  | DNAH9    | -2.886±0.426 | -1.908±0.92  | 1.86E-09 |
| cg02932669 | 13 | 102068258 | NALCN    | -2.223±0.483 | -1.181±0.974 | 1.86E-09 |
| cg13756879 | 11 | 2161473   | IGF2-AS  | -4.882±0.798 | -3.167±1.603 | 1.88E-09 |
| cg13792279 | 21 | 31538549  | CLDN17   | 3.388±0.283  | 2.456±0.899  | 1.89E-09 |
| cg21109025 | 17 | 32580869  | CCL2     | 1.377±0.297  | 0.5±0.842    | 1.89E-09 |
| cg03704024 | 3  | 129598923 | TMCC1    | 1.132±0.297  | 1.622±0.425  | 1.94E-09 |
| cg13003163 | 12 | 48866481  | ANP32D   | 2.291±0.239  | 1.827±0.426  | 1.95E-09 |
| cg04922810 | 7  | 30721888  | CRHR2    | -3.448±0.387 | -2.269±1.135 | 1.96E-09 |
| cg25912717 | 1  | 155176951 | THBS3    | -3.438±0.364 | -3.953±0.422 | 1.97E-09 |
| cg04098585 | 2  | 204571215 | CD28     | 0.237±0.416  | -0.592±0.768 | 1.99E-09 |
| cg01390445 | 3  | 185271312 | LIPH     | 2.926±0.269  | 1.97±0.926   | 2.01E-09 |
| cg03860768 | 8  | 11351571  | BLK      | 1.923±0.291  | 1.099±0.792  | 2.02E-09 |
| cg05382123 | 1  | 34632585  | C1orf94  | -3.634±0.493 | -2.141±1.439 | 2.02E-09 |
| cg13958426 | 1  | 169396637 | CCDC181  | -4.04±0.319  | -2.333±1.668 | 2.02E-09 |
| cg03311899 | 12 | 123187857 | HCAR2    | 2.685±0.5    | 1.588±1.031  | 2.04E-09 |
| cg03032025 | 5  | 173316748 | CPEB4    | -0.544±0.363 | 0.231±0.726  | 2.04E-09 |
| cg12207371 | 12 | 7655803   | CD163    | 0.475±0.261  | -0.345±0.793 | 2.10E-09 |
| cg15149098 | 19 | 49055027  | SULT2B1  | 1.567±0.269  | 0.767±0.771  | 2.11E-09 |
| cg23582408 | 20 | 62130111  | EEF1A2   | -4.743±0.652 | -3.427±1.223 | 2.11E-09 |
| cg27212977 | 8  | 6783407   | DEFA6    | 2.881±0.244  | 2.341±0.509  | 2.12E-09 |
| cg07369274 | 3  | 58200599  | 0        | -0.708±0.449 | -1.504±0.72  | 2.19E-09 |
| cg12163132 | 17 | 59475917  | TBX2     | -1.51±0.33   | -0.687±0.785 | 2.19E-09 |
| cg03167883 | 8  | 49502967  | 0        | 1.055±0.428  | 0.248±0.742  | 2.20E-09 |
| cg12968903 | 4  | 153601789 | TMEM154  | 1.85±0.348   | 1.019±0.79   | 2.20E-09 |
| cg15952487 | 1  | 158300733 | CD1B     | -0.056±0.278 | -0.982±0.898 | 2.22E-09 |
| cg05947740 | 8  | 22089778  | PHYHIP   | -1.003±0.35  | -0.378±0.568 | 2.23E-09 |
| cg20768743 | 18 | 67624846  | CD226    | 0.486±0.252  | -0.125±0.582 | 2.25E-09 |
| cg01015871 | 16 | 56599188  | MT4      | 0.823±0.252  | -0.036±0.836 | 2.26E-09 |
| cg19560971 | 11 | 119218238 | MFRP     | 1.565±0.228  | 0.856±0.688  | 2.26E-09 |
| cg03842617 | 7  | 150688556 | NOS3     | 2.574±0.369  | 1.724±0.807  | 2.27E-09 |
| cg12582008 | 13 | 53603286  | OLFM4    | 2.516±0.285  | 1.567±0.923  | 2.28E-09 |
| cg19233472 | 5  | 169532752 | FOXI1    | 0.854±0.287  | 0.087±0.737  | 2.28E-09 |
| cg13954572 | 6  | 167798544 | TCP10    | 2.334±0.271  | 1.653±0.652  | 2.34E-09 |
| cg05615487 | 22 | 51176407  | ACR      | 1.567±0.313  | 0.789±0.745  | 2.34E-09 |

|            |    |           |           |              |              |          |
|------------|----|-----------|-----------|--------------|--------------|----------|
| cg10923408 | 13 | 31506710  | TEX26-AS1 | -0.417±0.306 | 0.209±0.586  | 2.34E-09 |
| cg17233601 | 11 | 18814418  | PTPN5     | 0.006±0.202  | 0.536±0.509  | 2.35E-09 |
| cg21284731 | 18 | 51038187  | DCC       | 1.051±0.196  | 0.771±0.233  | 2.36E-09 |
| cg13434203 | 19 | 43244502  | PSG3      | 2.187±0.117  | 1.7±0.477    | 2.36E-09 |
| cg14975238 | 7  | 97841591  | BHLHA15   | 2.503±0.188  | 2.219±0.243  | 2.37E-09 |
| cg09087901 | 6  | 161123803 | PLG       | 0.516±0.27   | -0.041±0.505 | 2.39E-09 |
| cg03426225 | 18 | 10697032  | PIEZO2    | 3.816±0.445  | 2.678±1.093  | 2.41E-09 |
| cg02992596 | 4  | 155702220 | RBM46     | 1.344±0.321  | 0.663±0.64   | 2.43E-09 |
| cg20804821 | 3  | 51988454  | GPR62     | 0.371±0.345  | -0.57±0.908  | 2.45E-09 |
| cg06537230 | 7  | 96653183  | DLX5      | -1.771±0.269 | -0.999±0.747 | 2.47E-09 |
| cg23316360 | 13 | 78492916  | EDNRB     | -2.984±0.586 | -1.526±1.398 | 2.50E-09 |
| cg02305723 | 15 | 25093456  | SNRPN     | 0.467±0.342  | 1.189±0.68   | 2.52E-09 |
| cg26365854 | 11 | 44330903  | ALX4      | -4.244±0.453 | -2.663±1.545 | 2.52E-09 |
| cg19282452 | 19 | 19855831  | 0         | 1.105±0.213  | 0.464±0.622  | 2.53E-09 |
| cg14170423 | 11 | 64513809  | RASGRP2   | -2.334±0.22  | -1.396±0.92  | 2.59E-09 |
| cg11864993 | 5  | 140559832 | PCDHB16   | -0.684±0.2   | -0.235±0.427 | 2.59E-09 |
| cg24142106 | 9  | 71319485  | PIP5K1B   | -1.685±0.345 | -2.423±0.697 | 2.62E-09 |
| cg25511807 | 11 | 102401438 | MMP7      | -0.29±0.266  | -1.069±0.757 | 2.63E-09 |
| cg26331247 | 20 | 31239171  | C20orf203 | -0.277±0.239 | -0.946±0.648 | 2.65E-09 |
| cg15749748 | 20 | 61050560  | GATA5     | -3.208±0.663 | -1.849±1.278 | 2.68E-09 |
| cg01408558 | 19 | 10563212  | PDE4A     | 1.894±0.154  | 1.6±0.274    | 2.68E-09 |
| cg05106502 | 17 | 46506947  | SKAP1     | 1.234±0.325  | 0.42±0.784   | 2.70E-09 |
| cg06541857 | 3  | 134203789 | CEP63     | -2.462±0.402 | -3.111±0.575 | 2.70E-09 |
| cg12365667 | 6  | 33043976  | HLA-DPB1  | -2.591±0.376 | -3.191±0.531 | 2.73E-09 |
| cg07643942 | 12 | 55029147  | LACRT     | 0.549±0.259  | -0.358±0.889 | 2.74E-09 |
| cg23693510 | 9  | 23825759  | ELAVL2    | -3.841±0.426 | -2.764±1.037 | 2.74E-09 |
| cg07908874 | 10 | 135123006 | TUBGCP2   | 2.183±0.197  | 1.211±0.959  | 2.75E-09 |
| cg22009923 | 11 | 832065    | CD151     | 1.263±0.198  | 0.86±0.379   | 2.75E-09 |
| cg01471384 | 4  | 107957265 | DKK2      | -4.405±0.399 | -3.002±1.376 | 2.76E-09 |
| cg09546307 | 12 | 8664963   | CLEC4D    | 2.531±0.243  | 1.792±0.72   | 2.78E-09 |
| cg06119575 | 9  | 108424905 | TAL2      | 2.219±0.366  | 1.492±0.68   | 2.78E-09 |
| cg22539738 | 13 | 45562280  | NUFIP1    | 2.781±0.361  | 1.918±0.828  | 2.79E-09 |
| cg20367961 | 1  | 41950237  | EDN2      | 1.174±0.232  | 0.654±0.496  | 2.82E-09 |
| cg15910079 | 14 | 21359415  | RNASE3    | 0.042±0.242  | -0.677±0.701 | 2.82E-09 |
| cg15164958 | 7  | 54609587  | VSTM2A    | -3.948±0.391 | -3.065±0.843 | 2.82E-09 |
| cg08861115 | 2  | 113735377 | IL36G     | 1.741±0.523  | 0.742±0.93   | 2.86E-09 |
| cg06539804 | 20 | 2781489   | CPXM1     | -5.022±0.598 | -3.24±1.739  | 2.89E-09 |
| cg18843688 | 13 | 45563253  | NUFIP1    | -1.268±0.293 | -1.844±0.539 | 2.90E-09 |
| cg05245861 | 18 | 31020511  | CCDC178   | -3.236±0.475 | -2.14±1.05   | 2.90E-09 |
| cg17703554 | 8  | 88886339  | DCAF4L2   | 3.011±0.311  | 2.034±0.955  | 2.92E-09 |
| cg24276445 | 6  | 88854953  | CNR1      | 2.684±0.333  | 2.149±0.475  | 2.92E-09 |
| cg15786837 | 17 | 46806935  | HOXB13    | -3.88±0.342  | -2.653±1.206 | 2.94E-09 |
| cg11880010 | 9  | 79328644  | PRUNE2    | -0.438±0.344 | 0.347±0.751  | 2.95E-09 |
| cg21754343 | 1  | 152658797 | LCE2B     | 1.711±0.258  | 0.663±1.033  | 2.95E-09 |
| cg12266049 | 11 | 69461334  | CCND1     | 3.272±0.788  | 4.16±0.556   | 2.96E-09 |
| cg12024292 | 9  | 120177979 | ASTN2     | -3.149±0.336 | -2.021±1.108 | 2.97E-09 |
| cg12711814 | 1  | 8939529   | ENO1      | -4.4±0.327   | -4.961±0.509 | 2.98E-09 |
| cg27076139 | 7  | 31091718  | ADCYAP1R1 | -4.491±0.498 | -3.146±1.307 | 3.01E-09 |
| cg20059151 | 1  | 95286311  | SLC44A3   | -1.634±0.236 | -2.134±0.475 | 3.03E-09 |
| cg04879235 | 17 | 42018862  | PPY       | 2.343±0.321  | 1.788±0.506  | 3.03E-09 |
| cg27248887 | 2  | 207025417 | EEF1B2    | -0.638±0.348 | -1.334±0.655 | 3.04E-09 |
| cg14400118 | 16 | 55513191  | MMP2      | -2.9±0.449   | -1.672±1.196 | 3.05E-09 |
| cg13163729 | 2  | 45169447  | SIX3      | -3.802±0.413 | -2.795±0.972 | 3.06E-09 |
| cg16872071 | 9  | 135997155 | RALGDS    | 0.034±0.286  | -0.804±0.819 | 3.07E-09 |
| cg26896762 | 5  | 50679361  | LOC642366 | -2.845±0.347 | -1.646±1.178 | 3.07E-09 |
| cg15128898 | 5  | 35618029  | SPEF2     | -2.012±0.747 | -3.3±1.172   | 3.07E-09 |
| cg08899626 | 4  | 16900199  | LDB2      | -2.559±0.452 | -1.597±0.914 | 3.08E-09 |
| cg27223047 | 5  | 127874825 | FBN2      | -1.75±0.316  | -0.575±1.159 | 3.11E-09 |
| cg18986165 | 19 | 52005990  | SIGLEC12  | 3.32±0.281   | 2.294±1.012  | 3.11E-09 |
| cg11928198 | 1  | 151137319 | LYSMD1    | -0.656±0.256 | -0.092±0.539 | 3.11E-09 |
| cg14449051 | 12 | 85306474  | SLC6A15   | -4.897±0.625 | -3.326±1.521 | 3.14E-09 |
| cg11389172 | 10 | 50818299  | SLC18A3   | -3.674±1.063 | -1.933±1.562 | 3.16E-09 |
| cg17819635 | 1  | 67217673  | TCTEX1D1  | -2.697±0.337 | -1.635±1.042 | 3.17E-09 |
| cg21359747 | 15 | 101420636 | ALDH1A3   | -3.687±0.536 | -2.065±1.589 | 3.18E-09 |
| cg01169726 | 7  | 96654425  | DLX5      | -2.844±0.298 | -1.9±0.927   | 3.18E-09 |
| cg22672790 | 5  | 161112787 | GABRA6    | -0.634±0.255 | -1.305±0.653 | 3.20E-09 |
| cg25076881 | 1  | 159409836 | OR10J1    | -0.622±0.271 | -1.394±0.754 | 3.20E-09 |

|            |    |           |              |              |              |          |
|------------|----|-----------|--------------|--------------|--------------|----------|
| cg19111262 | 1  | 159916126 | IGSF9        | 0.209±0.235  | -0.506±0.701 | 3.20E-09 |
| cg12006284 | 11 | 32449638  | WT1          | -1.574±0.589 | -0.547±0.94  | 3.23E-09 |
| cg24446548 | 7  | 19157263  | TWIST1       | -3.524±0.342 | -1.688±1.824 | 3.23E-09 |
| cg14399656 | 19 | 37179536  | ZNF567       | 1.294±0.217  | 1.023±0.204  | 3.24E-09 |
| cg25133016 | 12 | 57984719  | PIP4K2C      | -2.896±0.403 | -3.577±0.618 | 3.26E-09 |
| cg17108819 | 2  | 87017953  | CD8A         | -4.493±0.757 | -2.595±1.841 | 3.31E-09 |
| cg25095814 | 2  | 202098016 | CASP8        | -2.863±0.426 | -3.48±0.526  | 3.32E-09 |
| cg07022477 | 19 | 46798869  | HIF3A        | -0.186±0.341 | -0.945±0.727 | 3.33E-09 |
| cg14252059 | 11 | 120973274 | TECTA        | 1.091±0.309  | 0.27±0.801   | 3.34E-09 |
| cg20640433 | 6  | 129204206 | LAMA2        | -2.67±0.598  | -1.345±1.27  | 3.35E-09 |
| cg05412531 | 8  | 125183758 | FER1L6-AS2   | 2.197±0.3    | 2.746±0.509  | 3.37E-09 |
| cg06516124 | 11 | 32450591  | WT1          | -2.798±0.605 | -1.549±1.186 | 3.38E-09 |
| cg21942576 | 1  | 46126885  | GPBP1L1      | 0.372±0.267  | 0.797±0.379  | 3.38E-09 |
| cg26940261 | 12 | 105725112 | C12orf75     | -2.145±0.326 | -2.994±0.827 | 3.40E-09 |
| cg13548361 | 10 | 104178949 | PSD          | -3.776±0.385 | -2.662±1.092 | 3.40E-09 |
| cg20449692 | 3  | 170136920 | CLDN11       | -3.181±0.709 | -1.747±1.358 | 3.41E-09 |
| cg03854071 | 19 | 19626428  | TSSK6        | 4.078±0.371  | 2.905±1.154  | 3.43E-09 |
| cg20807545 | 16 | 77469538  | ADAMTS18     | -1.73±0.389  | -0.927±0.763 | 3.46E-09 |
| cg13247990 | 16 | 46782176  | MYLK3        | 1.532±0.163  | 1.99±0.448   | 3.46E-09 |
| cg16761581 | 14 | 24803807  | ADCY4        | -3.989±0.528 | -2.073±1.896 | 3.48E-09 |
| cg27546237 | 13 | 110960452 | COL4A2       | -3.147±0.499 | -1.938±1.172 | 3.49E-09 |
| cg21096915 | 10 | 42971209  | LINC00839    | -1.682±0.488 | -0.855±0.754 | 3.52E-09 |
| cg20234959 | 1  | 236237760 | 0            | 1.342±0.375  | 0.418±0.885  | 3.53E-09 |
| cg23003832 | 9  | 131486918 | LOC100506100 | -2.241±0.368 | -2.812±0.505 | 3.56E-09 |
| cg26159905 | 7  | 150884914 | ASB10        | 0.787±0.151  | 0.241±0.542  | 3.57E-09 |
| cg16112157 | 12 | 52887685  | KRT6A        | 2.15±0.278   | 1.391±0.744  | 3.61E-09 |
| cg08424423 | 6  | 31088188  | CDSN         | 3.436±0.418  | 2.656±0.73   | 3.66E-09 |
| cg13523557 | 7  | 45613725  | ADCY1        | -2.863±0.268 | -1.79±1.066  | 3.66E-09 |
| cg17771150 | 13 | 46756209  | LCP1         | 0.183±0.416  | -0.927±1.086 | 3.67E-09 |
| cg08468689 | 17 | 40346680  | GHDC         | -2.215±0.275 | -2.835±0.598 | 3.68E-09 |
| cg03928182 | 12 | 71314662  | PTPRR        | -3.263±0.221 | -2.335±0.923 | 3.68E-09 |
| cg15669228 | 9  | 21409505  | IFNA8        | 1.239±0.237  | 0.485±0.744  | 3.69E-09 |
| cg06722216 | 18 | 31803067  | NOL4         | -3.526±0.6   | -2.177±1.3   | 3.69E-09 |
| cg19202384 | 17 | 79894511  | PYCR1        | 0.734±0.176  | 0.161±0.566  | 3.71E-09 |
| cg07033083 | 7  | 72424763  | NSUN5P2      | -2.177±0.257 | -2.732±0.533 | 3.71E-09 |
| cg00626466 | 12 | 65153982  | GNS          | 0.659±0.311  | -0.258±0.903 | 3.73E-09 |
| cg17839611 | 17 | 47286802  | GNGT2        | 0.846±0.226  | 0.116±0.722  | 3.73E-09 |
| cg04603031 | 15 | 78913156  | CHRNA3       | -3.149±0.903 | -1.618±1.399 | 3.73E-09 |
| cg10498097 | 2  | 219221131 | C2orf62      | 1.971±0.171  | 1.077±0.893  | 3.74E-09 |
| cg21513553 | 21 | 47518637  | COL6A2       | -3.707±1.064 | -2.166±1.322 | 3.77E-09 |
| cg21033494 | 10 | 51550114  | MSMB         | 2.272±0.261  | 1.689±0.562  | 3.81E-09 |
| cg15918284 | 4  | 46392657  | GABRA2       | -3.376±0.344 | -2.214±1.152 | 3.84E-09 |
| cg18457737 | 11 | 133715076 | SPATA19      | 0.379±0.238  | -0.368±0.739 | 3.91E-09 |
| cg19836199 | 21 | 36421941  | RUNX1        | -0.432±0.463 | -1.608±1.149 | 3.94E-09 |
| cg11611600 | 15 | 84323154  | ADAMTSL3     | -3.447±0.499 | -2.104±1.318 | 3.95E-09 |
| cg10143146 | 6  | 33161377  | COL11A2      | -2.678±0.709 | -1.533±1.033 | 3.96E-09 |
| cg12571423 | 13 | 37006748  | CCNA1        | -2.285±0.289 | -1.167±1.114 | 3.96E-09 |
| cg18534730 | 19 | 48547448  | CABP5        | 1.277±0.274  | 0.477±0.788  | 3.96E-09 |
| cg20163033 | 4  | 2627194   | FAM193A      | 1.271±0.296  | 1.765±0.45   | 3.97E-09 |
| cg11096993 | 11 | 67417958  | ACY3         | -0.389±0.302 | -1.115±0.707 | 3.99E-09 |
| cg02882813 | 20 | 23860078  | CST5         | 1.862±0.223  | 1.148±0.707  | 4.01E-09 |
| cg11804789 | 20 | 24929716  | CST7         | 0.013±0.406  | -1.159±1.156 | 4.07E-09 |
| cg17568996 | 22 | 42828125  | NFAM1        | -1.973±0.388 | -0.93±1.024  | 4.07E-09 |
| cg23370883 | 7  | 44180604  | MYL7         | -0.243±0.281 | -0.936±0.676 | 4.08E-09 |
| cg27347104 | 12 | 6233657   | VWF          | 0.588±0.243  | 1.141±0.536  | 4.09E-09 |
| cg01493517 | 12 | 6665447   | IFFO1        | -0.653±0.333 | 0.226±0.863  | 4.09E-09 |
| cg10525372 | 6  | 112375333 | WISP3        | 1.671±0.234  | 0.939±0.725  | 4.12E-09 |
| cg06437862 | 13 | 19756096  | TUBA3C       | 2.89±0.474   | 1.816±1.04   | 4.21E-09 |
| cg14802951 | 9  | 136287409 | ADAMTS13     | -0.657±0.305 | -0.071±0.554 | 4.24E-09 |
| cg07044282 | 1  | 178840137 | ANGPTL1      | -0.323±0.298 | 0.38±0.685   | 4.27E-09 |
| cg21970438 | 6  | 167738277 | TLL2         | 2.653±0.27   | 1.863±0.782  | 4.30E-09 |
| cg21484834 | 20 | 62168579  | PTK6         | 1.19±0.25    | 0.458±0.725  | 4.37E-09 |
| cg06859828 | 1  | 6526718   | TNFRSF25     | 2.916±0.251  | 2.503±0.376  | 4.37E-09 |
| cg21995126 | 3  | 165555262 | BCHE         | -0.801±0.333 | -0.118±0.655 | 4.39E-09 |
| cg18328933 | 3  | 52008538  | ABHD14B      | 1.077±0.2    | 0.529±0.54   | 4.39E-09 |
| cg11158430 | 3  | 191001413 | UTS2B        | 1.461±0.336  | 0.786±0.645  | 4.41E-09 |
| cg14297029 | 22 | 37607676  | SSTR3        | 1.305±0.399  | 2.215±0.884  | 4.47E-09 |

|            |    |           |             |              |              |          |
|------------|----|-----------|-------------|--------------|--------------|----------|
| cg25229964 | 1  | 26503623  | CNKSRR1     | 2.325±0.208  | 1.669±0.652  | 4.47E-09 |
| cg23092823 | 1  | 53528612  | PODN        | -3.135±0.41  | -1.857±1.271 | 4.52E-09 |
| cg03294619 | 5  | 172661803 | NKX2-5      | -4.921±0.535 | -3.237±1.676 | 4.57E-09 |
| cg26717133 | 10 | 85953953  | CDHR1       | 0.127±0.303  | 0.791±0.643  | 4.58E-09 |
| cg20789691 | 9  | 5340039   | RLN1        | 2.138±0.183  | 1.509±0.628  | 4.62E-09 |
| cg07421682 | 15 | 102030850 | PCSK6       | 3.103±0.372  | 2.309±0.766  | 4.62E-09 |
| cg24243265 | 8  | 130799851 | GSDMC       | 1.665±0.293  | 0.805±0.853  | 4.62E-09 |
| cg22487322 | 6  | 137366322 | IL20RA      | 2.793±0.57   | 1.492±1.267  | 4.62E-09 |
| cg26803305 | 18 | 43304452  | SLC14A1     | 0.696±0.25   | 0.132±0.548  | 4.63E-09 |
| cg11319389 | 20 | 42544648  | TOX2        | -2.879±0.275 | -1.652±1.233 | 4.63E-09 |
| cg09478478 | 1  | 158322845 | CD1E        | 1.638±0.261  | 0.769±0.866  | 4.64E-09 |
| cg06690548 | 4  | 139162808 | SLC7A11     | 2.459±0.394  | 1.422±1.022  | 4.68E-09 |
| cg12943082 | 7  | 75419311  | CCL26       | 0.693±0.252  | 1.363±0.662  | 4.68E-09 |
| cg04623837 | 6  | 29943414  | HCG9        | -3.455±1.012 | -1.708±1.62  | 4.68E-09 |
| cg08961832 | 11 | 279185    | NLRP6       | -0.79±0.273  | -0.222±0.547 | 4.69E-09 |
| cg09837648 | 3  | 48466751  | PLXNB1      | 1.447±0.308  | 2.262±0.805  | 4.80E-09 |
| cg02329886 | 15 | 50557917  | HDC         | 1.943±0.226  | 2.437±0.48   | 4.80E-09 |
| cg15028436 | 7  | 37888078  | NME8        | 2.393±0.313  | 1.739±0.631  | 4.80E-09 |
| cg24775607 | 16 | 1129057   | SSTR5       | 4.043±0.658  | 2.561±1.442  | 4.81E-09 |
| cg19884600 | 1  | 158901938 | PYHIN1      | 2.27±0.358   | 1.336±0.922  | 4.87E-09 |
| cg11009736 | 2  | 119699682 | MARCO       | -0.248±0.262 | -1.104±0.855 | 4.87E-09 |
| cg14586939 | 4  | 156130206 | NPY2R       | -4.607±0.458 | -3.342±1.253 | 4.89E-09 |
| cg24993443 | 15 | 25123549  | SNRPN       | 0.709±0.339  | 1.285±0.534  | 4.89E-09 |
| cg20586531 | 3  | 146263147 | PLSCR1      | 1.885±0.25   | 1.38±0.486   | 4.93E-09 |
| cg23276695 | 6  | 88855716  | CNR1        | 0.694±0.258  | -0.167±0.861 | 4.94E-09 |
| cg15309006 | 16 | 23766116  | CHP2        | -2.811±0.699 | -1.375±1.383 | 4.98E-09 |
| cg00509670 | 14 | 37130313  | PAX9        | -1.702±0.396 | -0.649±1.042 | 5.00E-09 |
| cg16530429 | 1  | 26737470  | LIN28A      | -2.647±0.276 | -1.746±0.901 | 5.00E-09 |
| cg13005002 | 22 | 32752769  | RFPL3       | 1.008±0.311  | 0.19±0.809   | 5.03E-09 |
| cg10484958 | 13 | 53424127  | PCDH8       | -3.342±0.341 | -2.462±0.869 | 5.03E-09 |
| cg05406101 | 21 | 30392219  | RWDD2B      | 2.626±0.354  | 1.528±1.096  | 5.04E-09 |
| cg19304352 | 8  | 6796176   | DEFA4       | 2.317±0.191  | 1.894±0.412  | 5.04E-09 |
| cg18271969 | 3  | 183771499 | HTR3C       | 3.023±0.29   | 2.45±0.549   | 5.04E-09 |
| cg20329958 | 8  | 67090250  | CRH         | -2.905±0.409 | -1.906±0.983 | 5.10E-09 |
| cg10862535 | 19 | 46526483  | PGLYRP1     | -0.83±0.35   | -0.089±0.719 | 5.13E-09 |
| cg00579402 | 19 | 5838999   | FUT6        | 2.073±0.26   | 1.445±0.617  | 5.16E-09 |
| cg26195812 | 2  | 27071332  | DPYSL5      | -3.826±0.584 | -2.078±1.743 | 5.16E-09 |
| cg21073927 | 8  | 11562155  | GATA4       | -3.282±0.325 | -2.006±1.284 | 5.25E-09 |
| cg13759328 | 16 | 82661521  | CDH13       | -2.982±0.444 | -1.911±1.054 | 5.27E-09 |
| cg07221454 | 11 | 60552841  | MS4A10      | 2.733±0.231  | 3.298±0.557  | 5.28E-09 |
| cg01468621 | 11 | 1411609   | BRSK2       | -3.348±0.79  | -1.76±1.529  | 5.29E-09 |
| cg22740783 | 2  | 27341458  | CGREF1      | -3.04±0.383  | -2.12±0.905  | 5.30E-09 |
| cg09950370 | 8  | 21609373  | GFRA2       | 3.007±0.263  | 2.566±0.408  | 5.30E-09 |
| cg26391080 | 10 | 82297397  | SH2D4B      | 1.188±0.346  | 1.819±0.595  | 5.31E-09 |
| cg04172348 | 3  | 12046004  | SYN2        | -4.154±0.632 | -2.306±1.843 | 5.33E-09 |
| cg22175764 | 20 | 56803964  | 0           | -4.091±0.388 | -2.59±1.512  | 5.36E-09 |
| cg14642338 | 11 | 35547903  | PAMR1       | 0.273±0.422  | 0.94±0.605   | 5.41E-09 |
| cg09872233 | 17 | 4544925   | ALOX15      | -4.338±0.583 | -2.621±1.714 | 5.44E-09 |
| cg27043873 | 5  | 19981429  | CDH18       | 2.089±0.303  | 0.877±1.222  | 5.44E-09 |
| cg00775197 | 6  | 44265054  | TCTE1       | -3.595±0.412 | -2.45±1.14   | 5.45E-09 |
| cg19108718 | 5  | 94982330  | RFESD       | -2.659±0.298 | -3.427±0.76  | 5.46E-09 |
| cg17166812 | 1  | 161169574 | NDUFS2      | -1.691±0.318 | -0.921±0.76  | 5.48E-09 |
| cg18454685 | 17 | 48639239  | CACNA1G-AS1 | -3.04±0.736  | -1.617±1.363 | 5.54E-09 |
| cg09674867 | 11 | 8954206   | C11orf16    | 1.557±0.369  | 0.864±0.66   | 5.54E-09 |
| cg11378484 | 3  | 63848695  | THOC7       | -0.827±0.185 | -1.323±0.493 | 5.56E-09 |
| cg20080624 | 7  | 96651111  | DLX5        | -0.993±0.253 | -0.273±0.719 | 5.66E-09 |
| cg17527798 | 3  | 46506404  | LTF         | -0.265±0.216 | -1.137±0.881 | 5.68E-09 |
| cg19831077 | 7  | 151107924 | WDR86       | -0.474±0.351 | 0.337±0.797  | 5.70E-09 |
| cg08097755 | 7  | 100808488 | VGf         | -4.335±0.386 | -3.118±1.221 | 5.73E-09 |
| cg15439862 | 18 | 28622593  | DSC3        | -1.746±0.479 | -0.851±0.853 | 5.74E-09 |
| cg08422599 | 5  | 169931092 | KCNIP1      | -3.374±0.59  | -2.16±1.177  | 5.79E-09 |
| cg14366598 | 14 | 23841754  | IL25        | -0.331±0.231 | -1.025±0.696 | 5.82E-09 |
| cg22182945 | 4  | 71200583  | CABS1       | 2.196±0.201  | 1.442±0.762  | 5.88E-09 |
| cg07942995 | 19 | 58546307  | ZSCAN1      | 0.366±0.352  | 1.011±0.603  | 5.88E-09 |
| cg01447817 | 2  | 241630251 | AQP12A      | 0.535±0.253  | -0.173±0.706 | 5.88E-09 |
| cg03688818 | 3  | 49711147  | APEH        | -3.841±0.493 | -4.54±0.607  | 5.93E-09 |
| cg20305726 | 20 | 123613    | DEFB126     | 1.327±0.333  | 0.497±0.822  | 5.93E-09 |

|            |    |           |            |              |              |          |
|------------|----|-----------|------------|--------------|--------------|----------|
| cg09945801 | 8  | 30890139  | PURG       | -1.304±0.258 | -0.436±0.875 | 5.94E-09 |
| cg03630088 | 10 | 125651526 | CPXM2      | -1.96±0.222  | -0.902±1.074 | 5.94E-09 |
| cg25889160 | 14 | 95046342  | SERPINA5   | 2.721±0.186  | 2±0.729      | 5.95E-09 |
| cg16757724 | 20 | 43935528  | RBPJL      | 1.861±0.35   | 2.389±0.472  | 5.99E-09 |
| cg11393848 | 1  | 22969340  | C1QC       | -0.661±0.159 | -1.181±0.524 | 6.01E-09 |
| cg24816298 | 11 | 13519025  | PTH        | 1.54±0.27    | 0.739±0.804  | 6.02E-09 |
| cg07675682 | 17 | 78195515  | SLC26A11   | 0.707±0.213  | 1.075±0.346  | 6.02E-09 |
| cg13673514 | 14 | 101035818 | BEGAIN     | -2.113±0.504 | -1.193±0.874 | 6.03E-09 |
| cg10849854 | 2  | 11674557  | GREB1      | 0.549±0.431  | -0.454±0.977 | 6.03E-09 |
| cg24377133 | 8  | 144170375 | 0          | -2.054±0.327 | -2.736±0.664 | 6.06E-09 |
| cg03731898 | 2  | 207804081 | CPO        | 1.699±0.259  | 1.007±0.69   | 6.06E-09 |
| cg09174741 | 13 | 52981577  | THSD1      | 2.685±0.398  | 2.208±0.358  | 6.07E-09 |
| cg05307923 | 10 | 1779667   | ADARB2     | -4.73±0.351  | -3.036±1.722 | 6.08E-09 |
| cg15202954 | 13 | 102068996 | NALCN      | -2.325±0.406 | -1.336±0.98  | 6.12E-09 |
| cg16128363 | 18 | 3880558   | DLGAP1-AS3 | 3.074±0.34   | 2.561±0.459  | 6.14E-09 |
| cg26233914 | 16 | 31366536  | ITGAX      | -2.264±0.327 | -3.037±0.765 | 6.17E-09 |
| cg01421985 | 15 | 31947534  | OTUD7A     | 2.996±0.209  | 2.351±0.648  | 6.22E-09 |
| cg17964955 | 10 | 48390936  | RBP3       | 1.35±0.283   | 0.574±0.775  | 6.22E-09 |
| cg18105675 | 2  | 3642400   | COLEC11    | 0.088±0.33   | 0.76±0.652   | 6.23E-09 |
| cg06933965 | 12 | 108732994 | CMKLR1     | -2.498±0.402 | -1.614±0.867 | 6.26E-09 |
| cg15944856 | 2  | 197676146 | C2orf66    | 1.371±0.208  | 0.803±0.568  | 6.27E-09 |
| cg17288121 | 8  | 7288014   | DEFB103A   | 1.704±0.27   | 0.958±0.747  | 6.30E-09 |
| cg15783800 | 18 | 56246997  | ALPK2      | 2.448±0.239  | 1.749±0.701  | 6.30E-09 |
| cg09949775 | 19 | 18902107  | COMP       | -1.643±0.395 | -0.43±1.221  | 6.31E-09 |
| cg10642330 | 20 | 36150061  | NNAT       | 1.031±0.255  | 1.649±0.612  | 6.34E-09 |
| cg12324629 | 17 | 19771548  | ULK2       | -0.113±0.218 | 0.443±0.553  | 6.37E-09 |
| cg10934032 | 14 | 21249405  | RNASE6     | 0.019±0.336  | -0.783±0.795 | 6.38E-09 |
| cg21330703 | 11 | 113346388 | DRD2       | -3.211±0.413 | -2.224±0.977 | 6.39E-09 |
| cg04988423 | 11 | 44331577  | ALX4       | -4.619±0.655 | -2.582±2.052 | 6.49E-09 |
| cg25368651 | 11 | 6518287   | DNHD1      | 2.373±0.321  | 2.854±0.431  | 6.49E-09 |
| cg06285340 | 15 | 74659901  | CYP11A1    | 2.457±0.409  | 1.788±0.62   | 6.52E-09 |
| cg10432620 | 16 | 74808963  | FA2H       | -4.121±0.393 | -4.613±0.392 | 6.52E-09 |
| cg17797815 | 10 | 119806972 | CASC2      | 0.787±0.407  | -0.083±0.852 | 6.55E-09 |
| cg13688966 | 3  | 149192377 | TM4SF4     | -0.16±0.244  | -1.035±0.886 | 6.63E-09 |
| cg06500476 | 4  | 37584954  | C4orf19    | 1.545±0.271  | 0.913±0.625  | 6.63E-09 |
| cg10129493 | 19 | 51728586  | CD33       | 1.252±0.362  | 0.333±0.916  | 6.65E-09 |
| cg10059959 | 9  | 37035381  | PAX5       | -3.399±0.273 | -2.246±1.173 | 6.66E-09 |
| cg26270746 | 13 | 28366498  | GSX1       | -2.93±0.243  | -2.046±0.897 | 6.69E-09 |
| cg25218351 | 2  | 27505446  | TRIM54     | 0.043±0.215  | 0.548±0.5    | 6.74E-09 |
| cg15051063 | 3  | 142893947 | 0          | 2.709±0.35   | 1.622±1.097  | 6.74E-09 |
| cg09244244 | 5  | 94891907  | ARSK       | -2.911±0.383 | -2.266±0.604 | 6.74E-09 |
| cg25477904 | 19 | 43383405  | PSG1       | 1.988±0.236  | 1.414±0.571  | 6.74E-09 |
| cg18096388 | 2  | 242800973 | PDCD1      | -0.983±0.229 | -1.484±0.493 | 6.77E-09 |
| cg23338195 | 8  | 118146418 | SLC30A8    | 0.89±0.286   | -0.076±0.978 | 6.77E-09 |
| cg23967169 | 3  | 68981503  | FAM19A4    | -3.46±0.405  | -2.259±1.21  | 6.78E-09 |
| cg19248557 | 6  | 32407838  | HLA-DRA    | -1.988±0.4   | -2.719±0.699 | 6.78E-09 |
| cg15905124 | 5  | 72464325  | 0          | 2.104±0.251  | 1.45±0.654   | 6.83E-09 |
| cg17788013 | 5  | 147443252 | SPINK5     | 2.063±0.35   | 1.4±0.638    | 6.88E-09 |
| cg06940107 | 21 | 29911783  | LINC00161  | 0.766±0.238  | 0.054±0.719  | 6.93E-09 |
| cg04705866 | 5  | 54320790  | GZMK       | 1.901±0.214  | 1.271±0.635  | 6.97E-09 |
| cg11808874 | 2  | 70529494  | FAM136A    | 1.178±0.149  | 0.419±0.775  | 7.00E-09 |
| cg08315770 | 6  | 39281885  | KCNK17     | -3.581±0.769 | -2.241±1.267 | 7.02E-09 |
| cg26354398 | 9  | 116224036 | RGS3       | 2.382±0.286  | 1.979±0.352  | 7.02E-09 |
| cg26620157 | 14 | 37130297  | PAX9       | -1.961±0.379 | -0.833±1.138 | 7.08E-09 |
| cg23696618 | 18 | 61583699  | SERPINB10  | 0.509±0.285  | -0.283±0.797 | 7.13E-09 |
| cg18705301 | 15 | 41695430  | NDUFAF1    | 0.79±0.314   | 0.082±0.693  | 7.17E-09 |
| cg11376198 | 1  | 19600730  | AKR7L      | -1.183±0.801 | -0.118±0.895 | 7.23E-09 |
| cg27285056 | 19 | 50868879  | NAPSA      | 0.494±0.266  | -0.288±0.79  | 7.32E-09 |
| cg17371081 | 11 | 20690957  | NELL1      | -3.74±0.883  | -1.96±1.738  | 7.43E-09 |
| cg10073042 | 22 | 22973200  | 0          | 1.297±0.206  | 0.861±0.428  | 7.44E-09 |
| cg14785479 | 22 | 20792535  | SCARF2     | -3.497±0.974 | -2.12±1.207  | 7.45E-09 |
| cg13202751 | 5  | 1446443   | SLC6A3     | -1.575±0.36  | -0.978±0.559 | 7.56E-09 |
| cg27223827 | 2  | 106054920 | FHL2       | -0.577±0.256 | 0.092±0.672  | 7.58E-09 |
| cg05997860 | 14 | 70923895  | ADAM21     | 0.402±0.285  | -0.301±0.704 | 7.62E-09 |
| cg15447486 | 12 | 123201676 | HCAR3      | 1.198±0.451  | 0.314±0.861  | 7.63E-09 |
| cg27210447 | 1  | 16348849  | CLCNKA     | 2.102±0.258  | 1.687±0.385  | 7.66E-09 |
| cg20099806 | 17 | 61849988  | CCDC47     | -0.815±0.252 | -1.42±0.603  | 7.67E-09 |

|            |    |           |             |              |              |          |
|------------|----|-----------|-------------|--------------|--------------|----------|
| cg15489301 | 7  | 134213038 | AKR1B10     | -1.447±0.336 | -1.972±0.483 | 7.70E-09 |
| cg01692815 | 5  | 77591420  | AP3B1       | -4.753±0.386 | -5.346±0.541 | 7.76E-09 |
| cg25668368 | 2  | 163695882 | KCNH7       | -3.256±0.368 | -2.326±0.932 | 7.81E-09 |
| cg11847808 | 1  | 22889611  | EPHA8       | -2.693±0.415 | -1.701±0.991 | 7.89E-09 |
| cg09649610 | 1  | 235814039 | GNG4        | -1.753±0.383 | -0.636±1.13  | 7.90E-09 |
| cg07017706 | 12 | 53013331  | KRT73       | 1.86±0.18    | 1.247±0.625  | 7.97E-09 |
| cg22920873 | 7  | 139025153 | C7orf55     | -4.907±0.55  | -5.706±0.712 | 8.00E-09 |
| cg12420104 | 9  | 977109    | DMRT3       | -3.189±0.662 | -1.746±1.429 | 8.03E-09 |
| cg17786776 | 7  | 32996145  | FKBP9       | 0.844±0.298  | 0.22±0.615   | 8.04E-09 |
| cg21824213 | 15 | 40886047  | CASC5       | -5.008±0.529 | -3.673±1.341 | 8.10E-09 |
| cg19355190 | 10 | 64575798  | EGR2        | -2.469±0.262 | -1.434±1.059 | 8.10E-09 |
| cg23307338 | 11 | 60260467  | MS4A12      | 0.987±0.316  | 0.123±0.873  | 8.10E-09 |
| cg10989326 | 1  | 93258908  | EVI5        | 1.384±0.244  | 0.882±0.493  | 8.14E-09 |
| cg16268563 | 6  | 31513680  | ATP6V1G2    | 2.125±0.215  | 1.686±0.431  | 8.17E-09 |
| cg23244913 | 6  | 29943401  | HCG9        | -2.576±0.973 | -0.947±1.535 | 8.21E-09 |
| cg13562911 | 6  | 11044106  | ELOVL2-AS1  | -4.34±0.38   | -2.517±1.874 | 8.23E-09 |
| cg08806153 | 2  | 176971961 | HOXD11      | -3.749±0.626 | -2.311±1.433 | 8.23E-09 |
| cg01888566 | 7  | 130126513 | MEST        | -0.664±0.374 | -1.856±1.214 | 8.24E-09 |
| cg25920792 | 10 | 124220729 | HTRA1       | -4.719±0.986 | -3.466±1.023 | 8.26E-09 |
| cg07440877 | 13 | 24523079  | ANKRD20A19P | 3.001±0.346  | 2.29±0.699   | 8.27E-09 |
| cg14753432 | 11 | 44324833  | ALX4        | -0.28±0.209  | 0.134±0.405  | 8.29E-09 |
| cg13943564 | 18 | 61555117  | SERPINB2    | 1.41±0.246   | 0.667±0.754  | 8.30E-09 |
| cg04520391 | 12 | 11507917  | PRB1        | 1.774±0.217  | 1.101±0.685  | 8.44E-09 |
| cg24262376 | 1  | 151137274 | LYSMD1      | 0.766±0.255  | 1.465±0.707  | 8.45E-09 |
| cg12840719 | 9  | 21968233  | CDKN2A      | -2.566±0.235 | -1.545±1.037 | 8.54E-09 |
| cg12242338 | 3  | 140397089 | TRIM42      | 1.541±0.195  | 0.613±0.955  | 8.55E-09 |
| cg12259537 | 19 | 58514694  | ZNF606      | -2.616±0.463 | -1.643±0.961 | 8.61E-09 |
| cg14120879 | 8  | 7344638   | DEFB105B    | 2.171±0.197  | 1.54±0.644   | 8.67E-09 |
| cg12815916 | 2  | 131114432 | PTPN18      | 4.434±0.323  | 3.025±1.449  | 8.70E-09 |
| cg06121469 | 15 | 44956098  | SPG11       | -4.104±0.404 | -4.637±0.451 | 8.72E-09 |
| cg04878152 | 3  | 148415960 | AGTR1       | -2.229±0.418 | -1.215±1.018 | 8.72E-09 |
| cg12864235 | 5  | 27038782  | CDH9        | -1.514±0.507 | -0.464±1.036 | 8.72E-09 |
| cg20645065 | 1  | 21836138  | ALPL        | -3.844±0.574 | -2.498±1.347 | 8.72E-09 |
| cg17605084 | 12 | 54891491  | NCKAP1L     | -0.002±0.392 | -0.93±0.929  | 8.76E-09 |
| cg08260891 | 20 | 44518802  | CTSA        | -3.018±0.585 | -1.821±1.18  | 8.78E-09 |
| cg08623787 | 1  | 165414611 | RXRG        | -2.652±0.399 | -1.807±0.837 | 8.78E-09 |
| cg04484789 | 17 | 38928324  | KRT26       | 2.486±0.235  | 1.889±0.602  | 8.79E-09 |
| cg04099420 | 6  | 3076354   | RIPK1       | -0.722±0.38  | 0.173±0.897  | 8.79E-09 |
| cg01805540 | 10 | 18429749  | CACNB2      | -3.633±1.002 | -1.751±1.83  | 8.99E-09 |
| cg25221254 | 19 | 6333547   | ACER1       | 2.315±0.252  | 1.602±0.724  | 9.08E-09 |
| cg05364569 | 9  | 65493790  | FAM74A2     | 2.056±0.249  | 1.521±0.531  | 9.09E-09 |
| cg13994177 | 15 | 25296464  | SNORD116-1  | 2.3±0.233    | 1.662±0.647  | 9.09E-09 |
| cg25956985 | 22 | 39795188  | TAB1        | 0.142±0.3    | -0.469±0.603 | 9.17E-09 |
| cg14506552 | 1  | 11918954  | NPPB        | -1.142±0.404 | -0.373±0.75  | 9.23E-09 |
| cg17894008 | 17 | 59668604  | NACA2       | 3.098±0.278  | 2.237±0.88   | 9.27E-09 |
| cg05480532 | 4  | 68830216  | TMPRSS11A   | 1.52±0.201   | 1.267±0.207  | 9.28E-09 |
| cg14950072 | 18 | 7118122   | LAMA1       | -3.661±0.446 | -2.458±1.22  | 9.38E-09 |
| cg18878432 | 17 | 46683409  | HOXB6       | -0.022±0.294 | 0.757±0.79   | 9.48E-09 |
| cg27478659 | 17 | 39769012  | KRT16       | 0.421±0.203  | -0.107±0.535 | 9.53E-09 |
| cg14900471 | 8  | 11561620  | GATA4       | -4.187±0.674 | -2.397±1.816 | 9.55E-09 |
| cg07851192 | 18 | 77624513  | KCNG2       | 2.433±0.539  | 3.136±0.593  | 9.66E-09 |
| cg02148834 | 21 | 10991354  | TPTE        | 2.157±0.387  | 2.804±0.613  | 9.72E-09 |
| cg26205131 | 5  | 1444878   | SLC6A3      | -4.534±0.483 | -3.225±1.33  | 9.82E-09 |
| cg08474603 | 1  | 159684431 | CRP         | 2.102±0.34   | 1.456±0.632  | 9.93E-09 |
| cg11308840 | 9  | 32783516  | TMEM215     | -2.874±0.432 | -1.972±0.896 | 9.94E-09 |
| cg27496506 | 15 | 43559170  | TGM5        | 1.414±0.277  | 0.618±0.812  | 9.97E-09 |
| cg10648113 | 4  | 70627751  | SULT1B1     | 3.429±0.346  | 2.844±0.557  | 9.99E-09 |
| cg01669948 | 6  | 39290877  | KCNK16      | 2.198±0.244  | 1.402±0.817  | 1.00E-08 |
| cg16098170 | 19 | 2255848   | JSRP1       | 2.431±0.285  | 1.945±0.465  | 1.01E-08 |
| cg25729068 | 14 | 92303235  | TC2N        | -4.091±0.473 | -4.66±0.446  | 1.01E-08 |
| cg16743289 | 1  | 174968144 | CACYBP      | -0.373±0.237 | -1.016±0.655 | 1.02E-08 |
| cg18437633 | 2  | 161056639 | ITGB6       | 1.398±0.344  | 0.502±0.911  | 1.04E-08 |
| cg15843823 | 17 | 4544964   | ALOX15      | -3.146±0.415 | -1.792±1.392 | 1.04E-08 |
| cg27495845 | 1  | 161693088 | FCRLB       | 0.346±0.272  | -0.484±0.851 | 1.04E-08 |
| cg26829131 | 12 | 54393375  | HOXC9       | -4.301±0.448 | -2.812±1.531 | 1.05E-08 |
| cg09750183 | 11 | 61008109  | PGA5        | 1.95±0.33    | 2.657±0.705  | 1.05E-08 |
| cg11634198 | 17 | 37764158  | NEUROD2     | -2.052±0.204 | -1.265±0.813 | 1.05E-08 |

|            |    |           |                  |              |              |          |
|------------|----|-----------|------------------|--------------|--------------|----------|
| cg19812619 | 12 | 53600654  | <i>ITGB7</i>     | 2.149±0.398  | 1.491±0.625  | 1.06E-08 |
| cg17410236 | 14 | 85996495  | <i>FLRT2</i>     | -2.918±0.756 | -1.468±1.423 | 1.06E-08 |
| cg20557202 | 19 | 17982930  | <i>SLC5A5</i>    | -4.126±0.651 | -2.773±1.346 | 1.06E-08 |
| cg16324018 | 2  | 85580627  | <i>RETSAT</i>    | 0.958±0.305  | 0.162±0.81   | 1.07E-08 |
| cg04988978 | 17 | 56359578  | <i>MPO</i>       | -0.325±0.284 | -1.229±0.93  | 1.08E-08 |
| cg03283842 | 2  | 179343803 | <i>FKBP7</i>     | -3.974±0.414 | -4.608±0.587 | 1.09E-08 |
| cg16570917 | 1  | 43996062  | <i>PTPRF</i>     | 2.26±0.142   | 1.892±0.374  | 1.10E-08 |
| cg13406950 | 1  | 89530664  | <i>GBP1</i>      | -2.496±0.492 | -1.742±0.698 | 1.10E-08 |
| cg08191915 | 11 | 124481614 | <i>PANX3</i>     | 1.025±0.176  | 0.364±0.684  | 1.10E-08 |
| cg23743472 | 11 | 125649234 | <i>PATE2</i>     | 2.255±0.239  | 1.307±0.982  | 1.10E-08 |
| cg12547930 | 20 | 44168753  | <i>WFDC6</i>     | 1.801±0.303  | 1.09±0.719   | 1.12E-08 |
| cg09448880 | 1  | 153283841 | <i>PGLYRP3</i>   | 1.687±0.181  | 0.877±0.842  | 1.13E-08 |
| cg07558455 | 1  | 62784762  | <i>KANK4</i>     | -3.751±0.91  | -2.177±1.516 | 1.13E-08 |
| cg07694025 | 4  | 154709441 | <i>SFRP2</i>     | -3.067±0.419 | -2.065±1.014 | 1.13E-08 |
| cg01535453 | 12 | 121163887 | <i>ACADS</i>     | -4.702±0.535 | -4.007±0.59  | 1.13E-08 |
| cg18119407 | 2  | 201980504 | <i>CFLAR</i>     | -0.316±0.254 | -0.949±0.644 | 1.13E-08 |
| cg18714560 | 11 | 628302    | <i>SCT</i>       | 2.222±0.286  | 1.645±0.573  | 1.14E-08 |
| cg23855392 | 15 | 80189782  | <i>MTHFS</i>     | -3.09±0.751  | -3.962±0.656 | 1.14E-08 |
| cg05596294 | 1  | 99729757  | <i>LPPR4</i>     | -2.64±0.338  | -1.937±0.701 | 1.14E-08 |
| cg06545504 | 4  | 70915792  | <i>HTN1</i>      | 2.211±0.246  | 1.433±0.802  | 1.15E-08 |
| cg25908985 | 2  | 219925065 | <i>IHH</i>       | -3.327±0.58  | -1.887±1.465 | 1.17E-08 |
| cg13396068 | 12 | 55041379  | <i>DCD</i>       | 1.23±0.209   | 0.411±0.85   | 1.17E-08 |
| cg19712821 | 4  | 15965016  | <i>FGFBP2</i>    | -0.703±0.325 | -1.488±0.797 | 1.17E-08 |
| cg19402885 | 12 | 15475236  | <i>PTPRO</i>     | -3.184±0.344 | -1.996±1.229 | 1.18E-08 |
| cg03029616 | 21 | 31986034  | <i>KRTAP6-1</i>  | 2.282±0.195  | 1.545±0.765  | 1.18E-08 |
| cg11391732 | 5  | 53751919  | <i>HSPB3</i>     | 0.854±0.377  | 1.414±0.515  | 1.18E-08 |
| cg17830308 | 5  | 134872124 | <i>NEUROG1</i>   | -2.789±0.32  | -1.901±0.911 | 1.19E-08 |
| cg26926521 | 10 | 112837240 | <i>ADRA2A</i>    | -4.639±0.804 | -3.156±1.454 | 1.19E-08 |
| cg05822100 | 5  | 31194410  | <i>CDH6</i>      | -4.013±0.33  | -2.764±1.297 | 1.19E-08 |
| cg00107187 | 14 | 105070998 | <i>TMEM179</i>   | -1.624±0.336 | -0.778±0.862 | 1.19E-08 |
| cg27316956 | 6  | 152958899 | <i>SYNE1</i>     | -0.455±0.407 | -0.986±0.454 | 1.19E-08 |
| cg20287234 | 2  | 231789465 | <i>GPR55</i>     | 0.512±0.4    | -0.471±1.001 | 1.20E-08 |
| cg25047001 | 16 | 10277017  | <i>GRIN2A</i>    | -4.874±0.42  | -3.514±1.406 | 1.20E-08 |
| cg24012708 | 9  | 116138128 | <i>HDHD3</i>     | 0.533±0.497  | -0.347±0.855 | 1.20E-08 |
| cg22571530 | 1  | 204797929 | <i>NFASC</i>     | -3.105±0.495 | -1.616±1.535 | 1.20E-08 |
| cg21146268 | 6  | 26183508  | <i>HIST1H2BE</i> | -3.009±0.299 | -2.097±0.941 | 1.20E-08 |
| cg24654350 | 19 | 55328867  | <i>KIR3DL1</i>   | 1.43±0.235   | 0.75±0.7     | 1.21E-08 |
| cg19423014 | 18 | 59560091  | <i>RNF152</i>    | -4.423±0.376 | -3.141±1.329 | 1.22E-08 |
| cg14254419 | 1  | 110162217 | <i>AMPD2</i>     | -3.058±0.362 | -3.7±0.624   | 1.22E-08 |
| cg14188111 | 1  | 153608034 | <i>S100A13</i>   | 2.387±0.313  | 1.718±0.672  | 1.22E-08 |
| cg07271264 | 11 | 17740977  | <i>MYOD1</i>     | -2.591±0.6   | -1.413±1.169 | 1.23E-08 |
| cg02238747 | 10 | 99161279  | <i>RRP12</i>     | -2.691±0.33  | -3.209±0.488 | 1.23E-08 |
| cg06493994 | 6  | 25652602  | <i>SCGN</i>      | -2.889±0.378 | -1.935±0.974 | 1.24E-08 |
| cg16003238 | 15 | 65670876  | <i>IGDCC3</i>    | -0.792±0.257 | -0.033±0.782 | 1.24E-08 |
| cg19803984 | 15 | 25068790  | <i>SNRPN</i>     | -0.235±0.176 | -0.755±0.536 | 1.24E-08 |
| cg19946699 | 21 | 40817645  | <i>SH3BGR</i>    | -0.396±0.207 | -0.686±0.26  | 1.24E-08 |
| cg10671066 | 1  | 160492861 | <i>SLAMF6</i>    | -2.427±0.354 | -3.086±0.649 | 1.26E-08 |
| cg11700584 | 14 | 50088544  | <i>MGAT2</i>     | -2.169±0.292 | -2.738±0.565 | 1.26E-08 |
| cg14366490 | 19 | 17571825  | <i>NXNL1</i>     | 0.743±0.238  | 0.091±0.67   | 1.26E-08 |
| cg21846488 | 1  | 152680843 | <i>LCE4A</i>     | 0.431±0.23   | -0.287±0.742 | 1.26E-08 |
| cg02932167 | 2  | 233352951 | <i>ECEL1</i>     | 0.398±0.19   | 0.923±0.54   | 1.28E-08 |
| cg12836863 | 13 | 32889023  | <i>BRCA2</i>     | 1.308±0.333  | 0.367±0.969  | 1.30E-08 |
| cg15625636 | 14 | 88472437  | <i>GPR65</i>     | 0.744±0.398  | 0.04±0.685   | 1.30E-08 |
| cg13156121 | 16 | 58010114  | <i>TEPP</i>      | 2.671±0.278  | 2.235±0.411  | 1.30E-08 |
| cg25975818 | 17 | 77704298  | <i>ENPP7</i>     | 3.039±0.233  | 2.563±0.477  | 1.31E-08 |
| cg20973210 | 19 | 2282729   | <i>C19orf35</i>  | -1.859±0.458 | -0.762±1.117 | 1.31E-08 |
| cg08475827 | 2  | 152266230 | <i>RIF1</i>      | -2.294±0.309 | -2.764±0.439 | 1.31E-08 |
| cg07373172 | 9  | 21166245  | <i>IFNA21</i>    | 1.825±0.274  | 1.323±0.493  | 1.32E-08 |
| cg20839025 | 21 | 19776616  | <i>TMPRSS15</i>  | -0.437±0.212 | -0.914±0.484 | 1.32E-08 |
| cg07218880 | 13 | 115046279 | <i>UPF3A</i>     | -0.857±0.253 | -1.603±0.771 | 1.33E-08 |
| cg01610488 | 8  | 72987870  | <i>TRPA1</i>     | -3.62±0.559  | -2.007±1.666 | 1.33E-08 |
| cg19421752 | 5  | 1225224   | <i>SLC6A18</i>   | -0.163±0.269 | -0.967±0.832 | 1.33E-08 |
| cg10635061 | 2  | 106055006 | <i>FHL2</i>      | -0.769±0.286 | 0.043±0.838  | 1.33E-08 |
| cg10370591 | 2  | 1417431   | <i>TPO</i>       | 1.917±0.233  | 1.052±0.902  | 1.34E-08 |
| cg25433648 | 1  | 153588782 | <i>S100A14</i>   | 1.425±0.306  | 0.439±1.023  | 1.34E-08 |
| cg15121304 | 22 | 22380100  | <i>0</i>         | 2.175±0.179  | 1.84±0.331   | 1.34E-08 |
| cg23301687 | 1  | 112162068 | <i>RAP1A</i>     | -0.335±0.259 | -0.928±0.603 | 1.35E-08 |

|            |    |           |           |              |              |          |
|------------|----|-----------|-----------|--------------|--------------|----------|
| cg13998293 | 1  | 26394435  | TRIM63    | 0.33±0.241   | -0.285±0.629 | 1.35E-08 |
| cg15895197 | 2  | 27301490  | EMILIN1   | -0.554±0.179 | -0.059±0.51  | 1.35E-08 |
| cg16864658 | 3  | 42306150  | CCK       | -2.75±0.418  | -1.687±1.09  | 1.35E-08 |
| cg19332710 | 20 | 43438865  | RIMS4     | -5.005±1.088 | -2.618±2.415 | 1.36E-08 |
| cg25760229 | 16 | 1203595   | CACNA1H   | -4.964±0.972 | -3.472±1.399 | 1.36E-08 |
| cg21096399 | 11 | 119188145 | MCAM      | -1.769±0.419 | -0.787±1     | 1.36E-08 |
| cg18804206 | 17 | 18162315  | FLII      | -1.434±0.2   | -1.891±0.464 | 1.37E-08 |
| cg07480567 | 17 | 13505174  | HS3ST3A1  | -3.438±0.828 | -1.942±1.469 | 1.38E-08 |
| cg04007936 | 16 | 8954017   | CARHSP1   | 1.39±0.324   | 2.116±0.736  | 1.38E-08 |
| cg06921282 | 11 | 536299    | HRAS      | -2.486±0.318 | -3.168±0.688 | 1.38E-08 |
| cg22161874 | 9  | 77503042  | TRPM6     | 2.573±0.312  | 1.737±0.86   | 1.38E-08 |
| cg00638514 | 17 | 72932048  | OTOP3     | -4.042±0.515 | -2.696±1.384 | 1.39E-08 |
| cg25025243 | 11 | 67350234  | GSTP1     | -0.661±0.254 | -1.244±0.594 | 1.40E-08 |
| cg25602457 | 18 | 49868101  | DCC       | -3.653±0.382 | -2.646±1.036 | 1.40E-08 |
| cg02805028 | 16 | 27899239  | GSG1L     | 0.472±0.224  | 0.939±0.471  | 1.41E-08 |
| cg06738602 | 14 | 52780634  | PTGER2    | -3.217±0.537 | -2.197±1.012 | 1.41E-08 |
| cg10539507 | 4  | 85420782  | NKX6-1    | -2.87±0.391  | -1.598±1.323 | 1.41E-08 |
| cg11003133 | 1  | 159046391 | AIM2      | 0.535±0.662  | -0.609±1.114 | 1.43E-08 |
| cg18338311 | 17 | 32907939  | TMEM132E  | -2.993±0.401 | -1.679±1.368 | 1.43E-08 |
| cg26026726 | 19 | 35862414  | 0         | 2.204±0.476  | 1.322±0.873  | 1.45E-08 |
| cg08872550 | 8  | 86375450  | CA2       | -3.604±0.24  | -4.087±0.484 | 1.45E-08 |
| cg22776578 | 5  | 175223497 | CPLX2     | -3.414±0.493 | -2.31±1.122  | 1.46E-08 |
| cg03349953 | 5  | 140515207 | PCDHB5    | -2.377±0.48  | -1.469±0.902 | 1.46E-08 |
| cg09839960 | 15 | 25523494  | SNORD109B | 3.002±0.246  | 2.223±0.81   | 1.46E-08 |
| cg16173067 | 20 | 1309722   | SDCBP2    | 1.799±0.351  | 0.832±0.999  | 1.46E-08 |
| cg16862361 | 2  | 31637622  | XDH       | 0.745±0.275  | -0.015±0.786 | 1.48E-08 |
| cg25737664 | 20 | 1538671   | SIRPD     | 2.853±0.193  | 1.947±0.952  | 1.48E-08 |
| cg17749443 | 9  | 115819190 | ZFP37     | -3.383±0.636 | -1.767±1.663 | 1.48E-08 |
| cg17740399 | 13 | 28494177  | PDX1      | -3.686±0.838 | -1.899±1.808 | 1.48E-08 |
| cg20916523 | 3  | 10184584  | VHL       | 0.669±0.356  | -0.41±1.122  | 1.50E-08 |
| cg03866607 | 17 | 59532826  | TBX4      | -0.902±0.202 | -0.405±0.51  | 1.50E-08 |
| cg10918927 | 12 | 54411193  | HOXC5     | -3.651±0.252 | -4.234±0.596 | 1.53E-08 |
| cg01668126 | 8  | 16050740  | MSR1      | 1.991±0.256  | 1.226±0.796  | 1.55E-08 |
| cg14322224 | 1  | 85931226  | DDAH1     | -1.165±0.254 | -1.695±0.536 | 1.55E-08 |
| cg01722994 | 16 | 10277317  | GRIN2A    | -4.537±0.405 | -3.167±1.433 | 1.55E-08 |
| cg07613153 | 14 | 104436947 | TDRD9     | 0.135±0.304  | -0.434±0.566 | 1.58E-08 |
| cg13168820 | 20 | 41818356  | PTPRT     | -3.694±0.963 | -2.031±1.627 | 1.59E-08 |
| cg27087809 | 15 | 78527410  | ACSBG1    | 1.849±0.268  | 1.096±0.782  | 1.60E-08 |
| cg06536578 | 14 | 24048555  | JPH4      | 0.77±0.318   | 1.512±0.759  | 1.60E-08 |
| cg17386185 | 3  | 52321266  | GLYCTK    | -2.051±0.326 | -2.592±0.523 | 1.61E-08 |
| cg03929796 | 3  | 52231840  | ALAS1     | -1.547±0.33  | -2.372±0.851 | 1.61E-08 |
| cg12954718 | 17 | 5031366   | USP6      | 0.06±0.188   | -0.39±0.463  | 1.62E-08 |
| cg05766474 | 17 | 34308668  | CCL16     | 3.126±0.304  | 2.275±0.884  | 1.65E-08 |
| cg21475402 | 1  | 156612140 | BCAN      | -2.688±0.565 | -1.222±1.517 | 1.65E-08 |
| cg27196745 | 12 | 15475319  | PTPRO     | -2.682±0.466 | -1.533±1.185 | 1.65E-08 |
| cg10125195 | 12 | 55028545  | LACRT     | 1.526±0.179  | 0.716±0.855  | 1.65E-08 |
| cg10874403 | 3  | 87325835  | POU1F1    | 0.333±0.265  | 0.798±0.456  | 1.65E-08 |
| cg24812103 | 8  | 101735630 | PABPC1    | -0.35±0.24   | -1.072±0.754 | 1.66E-08 |
| cg05414338 | 6  | 26250347  | 0         | -4.455±0.341 | -2.725±1.828 | 1.66E-08 |
| cg20516209 | 2  | 27301943  | EMILIN1   | 0.592±0.178  | 0.998±0.416  | 1.67E-08 |
| cg27543230 | 5  | 133562604 | PPP2CA    | -3.589±0.299 | -4.098±0.497 | 1.67E-08 |
| cg18877506 | 1  | 13910555  | PDPN      | -3.967±0.451 | -2.546±1.486 | 1.68E-08 |
| cg25766046 | 9  | 94712122  | ROR2      | -2.406±0.618 | -1.24±1.165  | 1.72E-08 |
| cg03490200 | 12 | 8975196   | A2ML1     | 2.642±0.387  | 1.784±0.878  | 1.73E-08 |
| cg02519218 | 12 | 133424286 | CHFR      | 1.04±0.294   | 1.671±0.643  | 1.74E-08 |
| cg00779924 | 10 | 8094641   | GATA3-AS1 | -2.951±0.366 | -1.932±1.061 | 1.75E-08 |
| cg10757144 | 5  | 140625237 | PCDHB15   | -2.341±0.299 | -1.368±1.02  | 1.75E-08 |
| cg19241744 | 10 | 73078790  | SLC29A3   | -1.547±0.356 | -2.209±0.66  | 1.77E-08 |
| cg09626984 | 8  | 11566096  | GATA4     | -0.77±0.681  | -0.022±0.534 | 1.77E-08 |
| cg10784341 | 6  | 143929300 | PHACTR2   | -0.504±0.349 | 0.385±0.921  | 1.78E-08 |
| cg27239157 | 3  | 183145817 | MCF2L2    | -3.891±0.32  | -2.63±1.331  | 1.78E-08 |
| cg03882305 | 7  | 72439946  | LOC541473 | 0.111±0.444  | 1.062±0.97   | 1.78E-08 |
| cg11200929 | 15 | 78632670  | CRABP1    | -3.796±0.474 | -2.406±1.453 | 1.79E-08 |
| cg09186006 | 10 | 91295299  | SLC16A12  | -3.616±0.904 | -2.266±1.268 | 1.79E-08 |
| cg15407570 | 3  | 52529524  | STAB1     | -0.277±0.151 | 0.245±0.549  | 1.79E-08 |
| cg25098401 | 1  | 152658407 | LCE2B     | 0.494±0.322  | -0.216±0.727 | 1.79E-08 |
| cg20804555 | 14 | 95235869  | GSC       | -3.422±0.344 | -2.183±1.305 | 1.82E-08 |

|            |    |           |              |              |              |          |
|------------|----|-----------|--------------|--------------|--------------|----------|
| cg20028470 | 2  | 27530829  | UCN          | -0.29±0.188  | 0.171±0.477  | 1.82E-08 |
| cg24587268 | 20 | 60813121  | OSBPL2       | -4.147±0.318 | -4.717±0.565 | 1.86E-08 |
| cg16673198 | 3  | 131754273 | CPNE4        | 2.163±0.224  | 1.609±0.574  | 1.86E-08 |
| cg09422355 | 19 | 48547158  | CABP5        | 1.954±0.277  | 1.294±0.682  | 1.88E-08 |
| cg04091078 | 12 | 20848285  | SLCO1C1      | 0.314±0.311  | 0.846±0.524  | 1.89E-08 |
| cg12645220 | 20 | 9819272   | PAK7         | -3.168±0.442 | -2.026±1.189 | 1.91E-08 |
| cg10920957 | 16 | 87635473  | JPH3         | -4.138±0.435 | -3.011±1.173 | 1.91E-08 |
| cg01726767 | 12 | 48965123  | LALBA        | 1.245±0.285  | 0.467±0.812  | 1.92E-08 |
| cg20472189 | 10 | 135051475 | VENTX        | 1.108±0.169  | 0.863±0.228  | 1.93E-08 |
| cg25784308 | 2  | 131513216 | AMER3        | -2.793±0.346 | -1.829±1.008 | 1.95E-08 |
| cg22220722 | 1  | 20306641  | PLA2G2A      | 1.478±0.303  | 0.84±0.652   | 1.96E-08 |
| cg18056600 | 17 | 4642047   | CXCL16       | -3.27±0.363  | -3.767±0.45  | 1.96E-08 |
| cg08784110 | 6  | 160328002 | MAS1         | 1.382±0.225  | 0.709±0.707  | 1.97E-08 |
| cg05113558 | 8  | 145702343 | FOXH1        | 1.326±0.298  | 0.644±0.704  | 1.97E-08 |
| cg24642523 | 14 | 65009265  | HSPA2        | -1.971±0.225 | -0.947±1.088 | 1.97E-08 |
| cg26538442 | 16 | 66994947  | CES3         | 1.587±0.217  | 0.884±0.741  | 1.97E-08 |
| cg14014225 | 22 | 38479236  | SLC16A8      | 1.988±0.342  | 2.509±0.496  | 1.98E-08 |
| cg21461100 | 19 | 46477338  | NOVA2        | -2.983±0.485 | -1.593±1.457 | 1.98E-08 |
| cg20491707 | 10 | 47083283  | NPY4R        | -0.89±0.275  | -0.136±0.789 | 2.00E-08 |
| cg21707816 | 3  | 38537451  | EXOGL        | 0.496±0.362  | -0.227±0.735 | 2.01E-08 |
| cg18401406 | 13 | 37247537  | SERTM1       | 1.056±0.325  | 1.681±0.63   | 2.01E-08 |
| cg02537838 | 20 | 61002595  | RBBP8NL      | 0.741±0.225  | 0.076±0.699  | 2.03E-08 |
| cg00363813 | 12 | 6664872   | IFFO1        | -0.179±0.312 | 0.367±0.542  | 2.03E-08 |
| cg23627134 | 2  | 143886375 | ARHGAP15     | 0.272±0.332  | -0.412±0.698 | 2.04E-08 |
| cg20812929 | 14 | 24458345  | DHRS4L2      | -1.146±0.351 | -1.873±0.743 | 2.05E-08 |
| cg26033681 | 15 | 25069376  | SNRPN        | -0.548±0.225 | -0.991±0.449 | 2.07E-08 |
| cg19067730 | 20 | 44518824  | CTSA         | -2.724±0.545 | -1.682±1.051 | 2.09E-08 |
| cg11375102 | 16 | 1583810   | TMEM204      | -0.767±0.254 | -0.106±0.691 | 2.09E-08 |
| cg21686987 | 16 | 75252973  | CTRB1        | 2.259±0.38   | 1.589±0.667  | 2.11E-08 |
| cg02477931 | 11 | 131532721 | NTM          | 1.843±0.195  | 0.946±0.956  | 2.11E-08 |
| cg21652012 | 5  | 170211009 | GABRP        | 2.967±0.251  | 2.355±0.637  | 2.15E-08 |
| cg15175266 | 5  | 22854704  | CDH12        | 0.989±0.287  | 0.199±0.829  | 2.15E-08 |
| cg05060662 | 12 | 14923882  | HIST4H4      | -4.808±0.417 | -3.477±1.407 | 2.16E-08 |
| cg24113449 | 22 | 25961367  | ADRBK2       | -3.981±0.336 | -3.251±0.75  | 2.16E-08 |
| cg23349790 | 1  | 18434576  | IGSF21       | -1.7±1.085   | -0.175±1.408 | 2.17E-08 |
| cg05492113 | 11 | 8060332   | TUB          | 1.484±0.214  | 0.969±0.535  | 2.17E-08 |
| cg04434339 | 2  | 107503547 | ST6GAL2      | -3.674±0.923 | -2.066±1.598 | 2.18E-08 |
| cg12150401 | 7  | 122635522 | TAS2R16      | 2.125±0.374  | 1.406±0.728  | 2.20E-08 |
| cg01739167 | 17 | 4806344   | CHRENE       | -0.132±0.278 | -0.616±0.481 | 2.20E-08 |
| cg06363129 | 7  | 16505602  | SOSTDC1      | -0.677±0.289 | 0.161±0.883  | 2.22E-08 |
| cg18490846 | 17 | 48845722  | LINC00483    | -0.405±0.236 | -1.252±0.9   | 2.24E-08 |
| cg10719920 | 21 | 46724843  | 0            | 3.481±0.318  | 2.804±0.696  | 2.24E-08 |
| cg00474004 | 9  | 21239944  | IFNA14       | 1.788±0.258  | 1.157±0.658  | 2.24E-08 |
| cg12783776 | 11 | 57365948  | SERPING1     | -3.684±0.448 | -2.891±0.792 | 2.28E-08 |
| cg04747619 | 8  | 6914838   | DEFA5        | -0.344±0.25  | -0.962±0.645 | 2.28E-08 |
| cg13156411 | 3  | 46919454  | PTH1R        | 3.184±0.187  | 2.884±0.292  | 2.30E-08 |
| cg19042947 | 14 | 95027441  | SERPINA4     | 0.295±0.166  | -0.185±0.507 | 2.32E-08 |
| cg04623955 | 14 | 102026376 | DIO3         | -2.465±0.378 | -1.389±1.135 | 2.32E-08 |
| cg10235741 | 3  | 58200326  | 0            | 2.274±0.323  | 1.609±0.683  | 2.34E-08 |
| cg20312228 | 3  | 126113707 | LOC100506907 | -2.733±0.54  | -1.686±1.065 | 2.36E-08 |
| cg01469547 | 11 | 7847155   | OR5P3        | 3.337±0.317  | 2.137±1.279  | 2.37E-08 |
| cg03848675 | 6  | 1389146   | FOXF2        | -4.188±0.426 | -3.136±1.101 | 2.37E-08 |
| cg26614073 | 3  | 47517819  | SCAP         | -0.164±0.27  | -0.791±0.653 | 2.39E-08 |
| cg06403553 | 6  | 49754848  | PGK2         | 2.455±0.284  | 1.615±0.889  | 2.39E-08 |
| cg07623294 | 9  | 23826507  | ELAVL2       | -4.619±0.42  | -3.631±1.03  | 2.40E-08 |
| cg06254453 | 6  | 26250350  | 0            | -4.906±0.47  | -3.265±1.746 | 2.40E-08 |
| cg02825709 | 16 | 3354207   | ZNF75A       | 2.139±0.226  | 1.565±0.602  | 2.41E-08 |
| cg21434954 | 1  | 152783137 | LCE1B        | 1.204±0.221  | 0.536±0.708  | 2.44E-08 |
| cg23239039 | 4  | 4389115   | NSG1         | -3.828±0.54  | -2.533±1.353 | 2.45E-08 |
| cg26104469 | 8  | 14411685  | SGCZ         | 0.069±0.248  | -0.589±0.692 | 2.46E-08 |
| cg26119740 | 11 | 73881915  | C2CD3        | -1.657±0.207 | -1.982±0.316 | 2.46E-08 |
| cg02184413 | 6  | 133035235 | VNN1         | 1.041±0.357  | 0.222±0.853  | 2.50E-08 |
| cg01817029 | 12 | 72665510  | TRHDE        | -3.219±0.459 | -2.013±1.269 | 2.50E-08 |
| cg21529807 | 19 | 42134478  | CEACAM4      | -0.396±0.275 | -1.169±0.816 | 2.50E-08 |
| cg26832142 | 1  | 66258441  | PDE4B        | -3.164±0.471 | -2.176±1.02  | 2.51E-08 |
| cg27519140 | 6  | 30312645  | RPP21        | 1.492±0.213  | 0.761±0.779  | 2.52E-08 |
| cg26065841 | 15 | 41244853  | CHAC1        | 2.134±0.175  | 1.582±0.586  | 2.53E-08 |

|            |    |           |            |              |              |          |
|------------|----|-----------|------------|--------------|--------------|----------|
| cg13170032 | 1  | 221052143 | HLX        | -3.704±0.543 | -2.558±1.183 | 2.53E-08 |
| cg22036988 | 3  | 140770345 | SPSB4      | -4.39±0.667  | -2.477±2.025 | 2.53E-08 |
| cg14614901 | 9  | 32783463  | TMEM215    | -3.667±0.525 | -2.555±1.149 | 2.54E-08 |
| cg06256735 | 12 | 8815894   | MFAP5      | 0.764±0.377  | -0.108±0.91  | 2.54E-08 |
| cg04270799 | 12 | 57944059  | KIF5A      | -3.323±0.32  | -2.067±1.345 | 2.56E-08 |
| cg09155001 | 10 | 105218401 | CALHM1     | 2.648±0.319  | 1.983±0.686  | 2.56E-08 |
| cg09030119 | 19 | 44905343  | ZNF285     | -1.92±0.282  | -1.099±0.87  | 2.57E-08 |
| cg08383315 | 11 | 8190565   | RIC3       | -4.832±0.677 | -2.864±2.087 | 2.59E-08 |
| cg26952188 | 11 | 76840241  | MYO7A      | 2.655±0.202  | 2.351±0.292  | 2.60E-08 |
| cg25165199 | 13 | 49107693  | RCBTB2     | -0.158±0.199 | 0.327±0.509  | 2.62E-08 |
| cg14150666 | 2  | 218991310 | CXCR2      | 2.672±0.316  | 1.873±0.84   | 2.62E-08 |
| cg04438497 | 11 | 68519252  | MTL5       | -1.22±0.177  | -1.775±0.592 | 2.64E-08 |
| cg11466837 | 11 | 120009682 | TRIM29     | 1.766±0.311  | 1.035±0.765  | 2.66E-08 |
| cg03876618 | 4  | 57976034  | LOC255130  | -2.764±0.564 | -1.564±1.243 | 2.68E-08 |
| cg23042138 | 3  | 47165568  | SETD2      | 2.206±0.201  | 1.943±0.236  | 2.69E-08 |
| cg20268522 | 11 | 112832152 | NCAM1      | -3.393±0.305 | -2.078±1.412 | 2.69E-08 |
| cg18963171 | 21 | 43442940  | ZNF295-AS1 | 0.883±0.315  | 0.206±0.702  | 2.70E-08 |
| cg08614481 | 6  | 78173250  | HTR1B      | -3.254±0.35  | -2.237±1.08  | 2.70E-08 |
| cg04764624 | 17 | 29718129  | RAB11FIP4  | -2.305±0.332 | -1.632±0.693 | 2.71E-08 |
| cg21321735 | 2  | 241760164 | KIF1A      | -5.733±0.992 | -4.087±1.632 | 2.71E-08 |
| cg17188046 | 6  | 166582197 | T          | -3.515±0.483 | -2.147±1.452 | 2.73E-08 |
| cg16777510 | 17 | 40440022  | STAT5A     | 0.012±0.342  | -0.784±0.833 | 2.73E-08 |
| cg04587910 | 2  | 220025744 | NHEJ1      | -2.228±0.216 | -2.551±0.31  | 2.79E-08 |
| cg10303842 | 5  | 22853730  | CDH12      | -2.657±0.265 | -1.795±0.921 | 2.79E-08 |
| cg05592398 | 7  | 73497778  | LIMK1      | -3.348±0.402 | -2.196±1.225 | 2.79E-08 |
| cg13991233 | 17 | 10102558  | GAS7       | -3.402±0.363 | -2.281±1.195 | 2.79E-08 |
| cg15236866 | 2  | 172948825 | DLX1       | -2.601±0.251 | -1.636±1.037 | 2.80E-08 |
| cg02260587 | 5  | 140474248 | PCDHB2     | -3.089±0.39  | -2.027±1.126 | 2.81E-08 |
| cg00061629 | 11 | 44325258  | ALX4       | -1.872±0.662 | -0.568±1.34  | 2.81E-08 |
| cg00465284 | 2  | 80531898  | LRRTM1     | -3.891±0.51  | -2.577±1.388 | 2.82E-08 |
| cg26304237 | 1  | 65730384  | DNAJC6     | -3.34±0.472  | -2.061±1.356 | 2.83E-08 |
| cg15555014 | 17 | 76164144  | SYNGR2     | -0.391±0.188 | -0.878±0.515 | 2.84E-08 |
| cg21842478 | 17 | 46806046  | HOXB13     | -4.71±0.689  | -3.015±1.786 | 2.86E-08 |
| cg04488521 | 5  | 178487716 | ZNF354C    | -3.902±0.678 | -2.72±1.189  | 2.87E-08 |
| cg01934790 | 16 | 756400    | FBXL16     | -3.472±0.292 | -2.55±0.986  | 2.87E-08 |
| cg21517055 | 19 | 14016717  | C19orf57   | -2.67±0.407  | -1.636±1.093 | 2.88E-08 |
| cg23166289 | 1  | 210001082 | DIEXF      | -1.525±0.539 | -2.582±1.087 | 2.89E-08 |
| cg21347412 | 19 | 4339217   | STAP2      | 2.079±0.288  | 1.299±0.827  | 2.90E-08 |
| cg16483466 | 20 | 31671234  | BPIFB4     | 1.456±0.293  | 0.671±0.832  | 2.91E-08 |
| cg10082841 | 9  | 130689321 | PIP5KL1    | -1.897±0.323 | -2.674±0.819 | 2.93E-08 |
| cg07715201 | 5  | 37840839  | GDNF-AS1   | -3.47±0.338  | -2.378±1.169 | 2.94E-08 |
| cg26158194 | 11 | 1874320   | LSP1       | 0.997±0.395  | 0.191±0.834  | 2.96E-08 |
| cg00328227 | 1  | 109204325 | HENMT1     | -0.557±0.29  | -1.286±0.77  | 2.97E-08 |
| cg26024843 | 9  | 137533949 | COL5A1     | -3.043±0.824 | -1.724±1.3   | 3.01E-08 |
| cg11733245 | 10 | 6104312   | IL2RA      | 1.225±0.453  | 0.389±0.853  | 3.01E-08 |
| cg11249173 | 6  | 11112209  | ERVFRD-1   | 0.069±0.143  | 0.329±0.264  | 3.01E-08 |
| cg10756887 | 22 | 24105692  | C22orf15   | -0.907±0.516 | -0.245±0.59  | 3.02E-08 |
| cg21643045 | 2  | 228678693 | CCL20      | 3.356±0.383  | 2.348±1.07   | 3.03E-08 |
| cg13998904 | 3  | 140396803 | TRIM42     | 2.222±0.253  | 1.505±0.764  | 3.05E-08 |
| cg19502744 | 2  | 31805915  | SRD5A2     | -1.778±0.461 | -0.805±1.013 | 3.07E-08 |
| cg00240432 | 7  | 19157296  | TWIST1     | -4.595±0.348 | -3.064±1.655 | 3.08E-08 |
| cg25014318 | 6  | 39016776  | GLP1R      | -2.937±0.389 | -1.841±1.169 | 3.08E-08 |
| cg04235146 | 12 | 110718311 | ATP2A2     | -4.04±0.286  | -4.418±0.344 | 3.09E-08 |
| cg06594008 | 22 | 41033637  | MKL1       | -2.428±0.395 | -3.03±0.585  | 3.10E-08 |
| cg09416313 | 19 | 3801727   | MATK       | -4.459±0.64  | -2.992±1.541 | 3.10E-08 |
| cg01656216 | 10 | 31273710  | ZNF438     | -0.408±0.32  | 0.172±0.59   | 3.11E-08 |
| cg03663215 | 5  | 7396491   | ADCY2      | -3.836±0.654 | -2.546±1.332 | 3.16E-08 |
| cg03453449 | 12 | 95945120  | USP44      | 1.088±0.272  | 1.577±0.497  | 3.16E-08 |
| cg21965997 | 10 | 135150367 | CALY       | -3.481±0.578 | -2.006±1.565 | 3.16E-08 |
| cg10150813 | 4  | 25865178  | SEL1L3     | -1.416±0.312 | -2.116±0.735 | 3.16E-08 |
| cg19674669 | 11 | 134146910 | GLB1L3     | -2.911±0.696 | -1.759±1.151 | 3.18E-08 |
| cg17971003 | 11 | 107582804 | SLN        | 0.671±0.216  | -0.052±0.777 | 3.20E-08 |
| cg08529529 | 13 | 31309799  | ALOX5AP    | 0.8±0.436    | -0.005±0.823 | 3.22E-08 |
| cg06817269 | 15 | 59909035  | GCNT3      | 2.103±0.311  | 1.361±0.783  | 3.22E-08 |
| cg00935364 | 11 | 394607    | PKP3       | 0.883±0.209  | 0.478±0.417  | 3.24E-08 |
| cg14662379 | 2  | 241759279 | KIF1A      | -2.828±0.493 | -1.895±0.958 | 3.25E-08 |
| cg21201109 | 19 | 11307090  | KANK2      | 0.528±0.322  | 1.103±0.584  | 3.26E-08 |

|            |    |           |                   |              |              |          |
|------------|----|-----------|-------------------|--------------|--------------|----------|
| cg21367957 | 13 | 113776252 | <i>F10</i>        | 2.655±0.327  | 1.844±0.86   | 3.28E-08 |
| cg09588653 | 5  | 149569276 | <i>SLC6A7</i>     | 0.654±0.223  | 0.173±0.504  | 3.31E-08 |
| cg15626350 | 6  | 152130207 | <i>ESR1</i>       | -1.3±0.485   | -0.467±0.841 | 3.32E-08 |
| cg23326197 | 7  | 99382370  | <i>CYP3A4</i>     | 0.815±0.331  | 0.096±0.753  | 3.32E-08 |
| cg15551881 | 9  | 123688715 | <i>TRAF1</i>      | 1.095±0.406  | 0.242±0.89   | 3.32E-08 |
| cg10894512 | 10 | 90712478  | <i>ACTA2</i>      | 1.072±0.28   | 1.601±0.544  | 3.33E-08 |
| cg18145505 | 15 | 33009498  | <i>GREM1</i>      | -3.465±0.334 | -2.319±1.235 | 3.33E-08 |
| cg02780849 | 1  | 235814163 | <i>GNG4</i>       | -2.981±0.474 | -1.974±1.053 | 3.34E-08 |
| cg24964368 | 19 | 52264413  | <i>FPR2</i>       | -1.127±0.277 | -0.387±0.788 | 3.36E-08 |
| cg13473383 | 11 | 57434378  | <i>ZDHHHC5</i>    | -3.308±0.246 | -3.75±0.451  | 3.41E-08 |
| cg07168556 | 17 | 48912483  | <i>WFIKK2</i>     | -0.674±0.439 | 0.316±1.044  | 3.41E-08 |
| cg26991946 | 10 | 102732224 | <i>SEMA4G</i>     | 2.263±0.363  | 1.732±0.511  | 3.44E-08 |
| cg23152755 | 8  | 7346035   | <i>DEFB105B</i>   | 0.805±0.244  | 0.203±0.639  | 3.45E-08 |
| cg27108154 | 4  | 96761377  | <i>PDHA2</i>      | 3.963±0.297  | 3.308±0.69   | 3.47E-08 |
| cg03766998 | 18 | 12378044  | <i>AFG3L2</i>     | -2.734±0.361 | -3.241±0.479 | 3.47E-08 |
| cg13550608 | 3  | 50314654  | <i>0</i>          | 3.195±0.382  | 2.686±0.468  | 3.47E-08 |
| cg22156632 | 2  | 219725069 | <i>WNT6</i>       | -1.752±0.275 | -1.152±0.63  | 3.52E-08 |
| cg09191327 | 9  | 133540108 | <i>PRDM12</i>     | -4.837±0.577 | -3.535±1.373 | 3.52E-08 |
| cg08005849 | 7  | 81399399  | <i>HGF</i>        | -1.572±0.359 | -0.688±0.94  | 3.52E-08 |
| cg12847373 | 13 | 78493349  | <i>EDNRB</i>      | -4.819±0.578 | -3.377±1.533 | 3.53E-08 |
| cg01920232 | 12 | 106976668 | <i>RFX4</i>       | -3.457±0.271 | -2.238±1.326 | 3.53E-08 |
| cg09964921 | 21 | 35885767  | <i>KCNE1</i>      | 1.653±0.233  | 2.021±0.363  | 3.55E-08 |
| cg01484156 | 8  | 102802615 | <i>NCALD</i>      | -0.06±0.364  | 0.81±0.922   | 3.57E-08 |
| cg11462533 | 1  | 40156840  | <i>HPCAL4</i>     | -2.155±0.308 | -2.713±0.571 | 3.58E-08 |
| cg08665772 | 1  | 160051377 | <i>KCNJ9</i>      | -1.439±0.347 | -0.543±0.956 | 3.58E-08 |
| cg15901783 | 13 | 77461426  | <i>KCTD12</i>     | -0.607±0.322 | 0.059±0.696  | 3.58E-08 |
| cg27318318 | 11 | 44332849  | <i>ALX4</i>       | -4.17±0.383  | -3.098±1.15  | 3.59E-08 |
| cg12832565 | 1  | 145715672 | <i>CD160</i>      | 1.271±0.368  | 0.669±0.602  | 3.65E-08 |
| cg21432954 | 13 | 38443809  | <i>TRPC4</i>      | -3.962±0.663 | -2.595±1.43  | 3.67E-08 |
| cg03891191 | 1  | 12916998  | <i>PRAMEF2</i>    | 1.119±0.241  | 0.508±0.652  | 3.68E-08 |
| cg20678353 | 15 | 38988560  | <i>C15orf53</i>   | -0.202±0.345 | -1.04±0.892  | 3.68E-08 |
| cg21004129 | 2  | 219032024 | <i>CXCR1</i>      | 1.268±0.232  | 0.701±0.604  | 3.71E-08 |
| cg03742003 | 4  | 20255264  | <i>SLIT2</i>      | -3.008±0.333 | -2.159±0.907 | 3.71E-08 |
| cg26898336 | 17 | 15244519  | <i>TEKT3</i>      | -3.622±0.631 | -2.662±0.942 | 3.72E-08 |
| cg01999333 | 19 | 15162623  | <i>CASP14</i>     | 0.867±0.336  | 0.168±0.732  | 3.72E-08 |
| cg14726637 | 1  | 207669308 | <i>CR1</i>        | -1.906±0.274 | -0.839±1.16  | 3.76E-08 |
| cg06597095 | 5  | 43480361  | <i>C5orf28</i>    | 0.647±0.226  | 1.036±0.395  | 3.79E-08 |
| cg07498879 | 22 | 30663041  | <i>OSM</i>        | 0.923±0.305  | 0.27±0.686   | 3.80E-08 |
| cg19568591 | 2  | 183731599 | <i>FRZB</i>       | -3.175±0.189 | -2.403±0.841 | 3.81E-08 |
| cg19873701 | 19 | 43773649  | <i>PSG9</i>       | 0.61±0.189   | 0.253±0.369  | 3.81E-08 |
| cg08072716 | 3  | 51989692  | <i>GPR62</i>      | -0.037±0.15  | 0.337±0.399  | 3.81E-08 |
| cg05666713 | 1  | 201181883 | <i>IGFN1</i>      | 1.69±0.259   | 1.188±0.522  | 3.81E-08 |
| cg11538128 | 5  | 178487481 | <i>ZNF354C</i>    | -5.138±0.701 | -3.917±1.243 | 3.82E-08 |
| cg14992108 | 8  | 121825470 | <i>SNTB1</i>      | 1.245±0.347  | 0.332±0.978  | 3.84E-08 |
| cg01584473 | 7  | 100663367 | <i>MUC17</i>      | 2.072±0.194  | 1.57±0.538   | 3.85E-08 |
| cg13191049 | 15 | 99645663  | <i>SYNM</i>       | -3.019±0.788 | -1.51±1.565  | 3.86E-08 |
| cg02148642 | 2  | 110549586 | <i>RGPD6</i>      | 0.172±0.244  | -0.458±0.675 | 3.86E-08 |
| cg10364513 | 1  | 165414379 | <i>RXRG</i>       | -4.756±0.635 | -3.366±1.468 | 3.91E-08 |
| cg07054641 | 3  | 113160554 | <i>WDR52</i>      | -0.644±0.339 | 0.196±0.896  | 3.93E-08 |
| cg04645174 | 19 | 14993513  | <i>OR7A17</i>     | 1.809±0.243  | 1.3±0.535    | 3.93E-08 |
| cg23499956 | 1  | 153584920 | <i>S100A16</i>    | 0.352±0.198  | -0.298±0.705 | 3.93E-08 |
| cg03941108 | 1  | 22985937  | <i>C1QB</i>       | 1.065±0.232  | 0.385±0.734  | 3.93E-08 |
| cg25894551 | 11 | 117699851 | <i>FXD2</i>       | 1.191±0.318  | 0.631±0.572  | 3.95E-08 |
| cg25381844 | 15 | 84116340  | <i>SH3GL3</i>     | -4.2±0.512   | -2.775±1.534 | 3.96E-08 |
| cg13560548 | 3  | 10150139  | <i>FANCD2OS</i>   | 1.923±0.443  | 2.525±0.564  | 3.99E-08 |
| cg15183083 | 11 | 30038310  | <i>KCNA4</i>      | -2.424±0.328 | -1.682±0.786 | 3.99E-08 |
| cg23620639 | 10 | 71561211  | <i>COL13A1</i>    | -3.233±0.312 | -3.752±0.523 | 4.02E-08 |
| cg10213812 | 17 | 26850322  | <i>FOXN1</i>      | 3.254±0.272  | 2.734±0.54   | 4.07E-08 |
| cg22377428 | 17 | 72363882  | <i>GPR142</i>     | 2.507±0.219  | 2.018±0.519  | 4.12E-08 |
| cg05674444 | 21 | 14414818  | <i>ANKRD30BP2</i> | -1.523±0.227 | -1.988±0.489 | 4.12E-08 |
| cg07973461 | 21 | 11098794  | <i>BAGE3</i>      | 2.675±0.314  | 1.931±0.794  | 4.17E-08 |
| cg08687901 | 6  | 26204924  | <i>HIST1H4E</i>   | -4.866±0.417 | -3.136±1.892 | 4.22E-08 |
| cg11262874 | 19 | 23941711  | <i>ZNF681</i>     | -1.152±0.141 | -0.925±0.227 | 4.23E-08 |
| cg04564030 | 18 | 63417392  | <i>CDH7</i>       | -3.317±0.422 | -2.173±1.234 | 4.27E-08 |
| cg13562542 | 3  | 71803339  | <i>GPR27</i>      | -3.654±1.31  | -1.837±1.727 | 4.29E-08 |
| cg20939319 | 8  | 30707701  | <i>TEX15</i>      | 0.375±0.27   | -0.204±0.606 | 4.30E-08 |
| cg07705908 | 6  | 34523925  | <i>SPDEF</i>      | 0.577±0.244  | -0.181±0.822 | 4.31E-08 |

|            |    |           |          |              |              |          |
|------------|----|-----------|----------|--------------|--------------|----------|
| cg10106388 | 1  | 160832662 | CD244    | -1.806±0.311 | -2.757±1.031 | 4.31E-08 |
| cg08696192 | 17 | 38657310  | TNS4     | 2.27±0.471   | 1.365±0.943  | 4.32E-08 |
| cg23865698 | 16 | 84327808  | WFDC1    | 0.115±0.346  | -0.869±1.064 | 4.32E-08 |
| cg17589341 | 18 | 43304079  | SLC14A1  | 0.233±0.233  | -0.363±0.64  | 4.33E-08 |
| cg10167296 | 1  | 206680628 | RASSF5   | -4.491±0.291 | -5.036±0.566 | 4.34E-08 |
| cg23749046 | 1  | 110082924 | GPR61    | 2.32±0.287   | 1.67±0.692   | 4.40E-08 |
| cg06630567 | 9  | 116840435 | AMBP     | 0.023±0.288  | 0.916±0.97   | 4.41E-08 |
| cg14225485 | 2  | 14772568  | FAM84A   | -3.609±0.736 | -2.227±1.437 | 4.41E-08 |
| cg05782292 | 11 | 628318    | SCT      | 2.46±0.28    | 1.814±0.689  | 4.42E-08 |
| cg17274064 | 21 | 40033892  | ERG      | -1.747±0.308 | -2.558±0.875 | 4.43E-08 |
| cg18294158 | 7  | 103849187 | ORC5     | 0.817±0.389  | 0.012±0.85   | 4.44E-08 |
| cg22438810 | 9  | 130911792 | LCN2     | 0.709±0.264  | 0.004±0.761  | 4.46E-08 |
| cg14178991 | 4  | 76440699  | THAP6    | 0.553±0.374  | -0.098±0.667 | 4.46E-08 |
| cg12832649 | 5  | 136834863 | SPOCK1   | -2.909±0.533 | -1.811±1.158 | 4.47E-08 |
| cg00953256 | 11 | 69468875  | CCND1    | 1.486±0.24   | 0.991±0.522  | 4.49E-08 |
| cg22445920 | 5  | 150683178 | SLC36A3  | 2.526±0.24   | 1.958±0.608  | 4.51E-08 |
| cg01305421 | 12 | 102874286 | IGF1     | -1.242±0.311 | -0.354±0.963 | 4.51E-08 |
| cg14323928 | 15 | 31393845  | TRPM1    | 2.599±0.275  | 2.166±0.433  | 4.51E-08 |
| cg07592353 | 5  | 161113339 | GABRA6   | 2.525±0.23   | 1.952±0.616  | 4.52E-08 |
| cg25288155 | 11 | 73357396  | PLEKHB1  | -0.304±0.211 | 0.241±0.587  | 4.54E-08 |
| cg06143901 | 20 | 591400    | TCF15    | 0.207±0.292  | 0.699±0.501  | 4.54E-08 |
| cg20334738 | 4  | 151502939 | MAB21L2  | 2.662±0.602  | 3.241±0.308  | 4.55E-08 |
| cg00563932 | 9  | 139871049 | PTGDS    | 1.356±0.295  | 0.811±0.565  | 4.56E-08 |
| cg22113807 | 20 | 3140865   | UBOX5    | -1.617±0.359 | -2.27±0.677  | 4.58E-08 |
| cg04786857 | 2  | 29033897  | SPDYA    | -3.328±0.516 | -2.035±1.392 | 4.69E-08 |
| cg11170796 | 19 | 1650224   | TCF3     | 2.08±0.314   | 1.615±0.456  | 4.73E-08 |
| cg25431974 | 2  | 233352936 | ECEL1    | 0.519±0.205  | 1.165±0.705  | 4.75E-08 |
| cg22074858 | 1  | 89488430  | GBP3     | -2.769±0.457 | -3.508±0.746 | 4.76E-08 |
| cg18408487 | 17 | 39993262  | NT5C3B   | 2.647±0.383  | 1.906±0.777  | 4.78E-08 |
| cg05647859 | 12 | 81331718  | LIN7A    | -3.038±0.541 | -1.602±1.553 | 4.79E-08 |
| cg25629694 | 17 | 62657497  | SMURF2   | -1.662±0.519 | -2.381±0.688 | 4.81E-08 |
| cg25995212 | 2  | 167342984 | SCN7A    | 2.144±0.234  | 1.268±0.96   | 4.82E-08 |
| cg17790333 | 15 | 74660265  | CYP11A1  | 1.567±0.292  | 1.031±0.558  | 4.82E-08 |
| cg25979644 | 18 | 55399003  | ATP8B1   | 2.34±0.354   | 1.865±0.447  | 4.84E-08 |
| cg15905634 | 7  | 143140053 | TAS2R60  | 2.369±0.199  | 1.701±0.731  | 4.85E-08 |
| cg21870884 | 1  | 200842429 | GPR25    | -0.736±0.398 | 0.054±0.832  | 4.89E-08 |
| cg22495124 | 17 | 64873528  | CACNG5   | 3.29±0.237   | 2.48±0.887   | 4.91E-08 |
| cg20131968 | 17 | 61850012  | CCDC47   | -0.395±0.243 | -1.088±0.754 | 5.02E-08 |
| cg18236079 | 17 | 13505590  | HS3ST3A1 | -4.304±0.521 | -2.987±1.423 | 5.02E-08 |
| cg06417962 | 11 | 507970    | RNH1     | 1.252±0.293  | 2.001±0.81   | 5.02E-08 |
| cg11750883 | 1  | 152486950 | CRCT1    | 0.606±0.228  | -0.138±0.815 | 5.02E-08 |
| cg06521852 | 22 | 38141419  | TRIOBP   | -2.33±0.384  | -2.903±0.567 | 5.03E-08 |
| cg18106189 | 18 | 13218595  | LDLRAD4  | -5.321±0.963 | -3.801±1.529 | 5.03E-08 |
| cg13349425 | 5  | 134783075 | C5orf20  | 1±0.222      | 0.143±0.942  | 5.05E-08 |
| cg04962134 | 11 | 55653310  | TRIM51   | 1.381±0.212  | 0.706±0.738  | 5.05E-08 |
| cg11787522 | 15 | 74495109  | STRA6    | -0.037±0.264 | -0.726±0.746 | 5.05E-08 |
| cg09044743 | 1  | 2458238   | PANK4    | -4.168±0.355 | -4.662±0.474 | 5.06E-08 |
| cg26845278 | 1  | 16763671  | SPATA21  | 1.723±0.316  | 1.212±0.518  | 5.06E-08 |
| cg26697117 | 17 | 3820518   | P2RX1    | 0.453±0.271  | 0.018±0.44   | 5.10E-08 |
| cg20383064 | 3  | 133117420 | BFSP2    | 2.605±0.28   | 1.729±0.958  | 5.13E-08 |
| cg16272420 | 10 | 118381044 | PNLIPRP2 | 0.803±0.207  | 0.146±0.719  | 5.15E-08 |
| cg15746445 | 2  | 234824933 | TRPM8    | 0.562±0.207  | -0.197±0.835 | 5.15E-08 |
| cg12827555 | 14 | 74706031  | VSX2     | -2.052±0.231 | -1.116±1.031 | 5.16E-08 |
| cg16358738 | 2  | 241808595 | AGXT     | 2.497±0.315  | 1.974±0.534  | 5.18E-08 |
| cg03099771 | 6  | 27215365  | PRSS16   | -0.378±0.328 | 0.315±0.737  | 5.18E-08 |
| cg21960882 | 16 | 32264404  | TP53TG3D | 0.625±0.421  | 1.319±0.707  | 5.19E-08 |
| cg09001777 | 19 | 5851504   | FUT3     | -0.479±0.244 | -1.192±0.779 | 5.20E-08 |
| cg16967583 | 2  | 241807859 | AGXT     | -0.409±0.315 | -1.199±0.854 | 5.20E-08 |
| cg17217677 | 16 | 68483194  | SMPD3    | 1.756±0.264  | 2.246±0.513  | 5.22E-08 |
| cg13980719 | 2  | 217725560 | TNP1     | 0.076±0.291  | -0.733±0.881 | 5.22E-08 |
| cg25400358 | 11 | 64054159  | GPR137   | 1.319±0.194  | 0.788±0.577  | 5.23E-08 |
| cg15817236 | 11 | 44331362  | ALX4     | -4.884±0.538 | -3.159±1.89  | 5.23E-08 |
| cg17233935 | 21 | 39577230  | DSCR10   | 1.309±0.321  | 0.754±0.572  | 5.24E-08 |
| cg19721889 | 5  | 153857789 | HAND1    | -3.093±0.627 | -1.888±1.267 | 5.29E-08 |
| cg24891133 | 13 | 31480335  | MEDAG    | -3.878±0.677 | -2.435±1.539 | 5.30E-08 |
| cg01837719 | 6  | 96463185  | FUT9     | -3.468±0.235 | -2.484±1.087 | 5.33E-08 |
| cg03171924 | 1  | 25258332  | RUNX3    | 0.133±0.302  | 0.881±0.808  | 5.33E-08 |

|            |    |           |           |              |              |          |
|------------|----|-----------|-----------|--------------|--------------|----------|
| cg13692433 | 11 | 112832159 | NCAM1     | -4.987±0.387 | -3.378±1.777 | 5.36E-08 |
| cg02793099 | 19 | 57350004  | PEG3      | 0.221±0.235  | 0.83±0.661   | 5.36E-08 |
| cg14741922 | 11 | 62036934  | SCGB2A2   | 2.139±0.206  | 1.747±0.411  | 5.36E-08 |
| cg04528819 | 7  | 130418315 | KLF14     | -2.402±0.416 | -1.099±1.428 | 5.37E-08 |
| cg02992632 | 3  | 192445380 | FGF12     | -3.64±0.457  | -2.54±1.188  | 5.40E-08 |
| cg19692710 | 11 | 73661920  | DNAJB13   | 1.174±0.252  | 0.438±0.805  | 5.43E-08 |
| cg02611282 | 7  | 28338985  | CREB5     | 0.557±0.266  | -0.224±0.854 | 5.45E-08 |
| cg22670329 | 4  | 74702075  | CXCL6     | -1.287±0.252 | -0.565±0.789 | 5.48E-08 |
| cg18084114 | 1  | 31197218  | MATN1     | 2.218±0.235  | 1.801±0.433  | 5.48E-08 |
| cg26612644 | 17 | 73041885  | ATP5H     | -0.535±0.48  | 0.008±0.444  | 5.52E-08 |
| cg10516886 | 1  | 111415232 | CD53      | 0.081±0.295  | -0.511±0.627 | 5.53E-08 |
| cg08349806 | 16 | 15489904  | MPV17L    | -1.909±0.697 | -0.89±1.004  | 5.54E-08 |
| cg15647515 | 7  | 116963802 | WNT2      | -3.679±0.383 | -2.684±1.082 | 5.55E-08 |
| cg03221619 | 19 | 7767348   | FCER2     | 0.329±0.262  | -0.176±0.532 | 5.57E-08 |
| cg13479669 | 9  | 21994108  | CDKN2A    | -3.966±0.359 | -4.531±0.571 | 5.57E-08 |
| cg20985014 | 6  | 112374151 | WISP3     | 2.166±0.229  | 1.653±0.551  | 5.57E-08 |
| cg25623640 | 4  | 71532172  | IGJ       | 0.495±0.257  | -0.086±0.625 | 5.57E-08 |
| cg25711779 | 2  | 56149825  | EFEMP1    | -2.467±0.311 | -1.576±0.975 | 5.64E-08 |
| cg12061236 | 6  | 151560886 | AKAP12    | -1.305±0.261 | -0.592±0.778 | 5.67E-08 |
| cg22039287 | 18 | 40696075  | RIT2      | 1.214±0.191  | 0.54±0.744   | 5.67E-08 |
| cg04541293 | 20 | 41819125  | PTPRT     | -2.526±0.257 | -1.9±0.678   | 5.71E-08 |
| cg25965576 | 20 | 23670089  | CST4      | 0.681±0.244  | 0.055±0.681  | 5.73E-08 |
| cg08935003 | 11 | 60101561  | MS4A6E    | -0.947±0.345 | -1.52±0.588  | 5.75E-08 |
| cg23422659 | 17 | 44929215  | WNT9B     | -4.291±0.857 | -2.913±1.403 | 5.81E-08 |
| cg14722162 | 5  | 134783186 | C5orf20   | 1.028±0.245  | 0.214±0.898  | 5.85E-08 |
| cg17142149 | 6  | 46293016  | RCAN2     | 3.025±0.243  | 2.534±0.523  | 5.89E-08 |
| cg10335112 | 11 | 195572    | ODF3      | 0.16±0.179   | -0.402±0.618 | 5.90E-08 |
| cg14948436 | 6  | 39290159  | KCNK16    | 2.558±0.179  | 1.989±0.626  | 5.90E-08 |
| cg10530281 | 12 | 115122054 | TBX3      | -4.286±0.602 | -2.706±1.724 | 5.92E-08 |
| cg05445326 | 3  | 196065569 | TM4SF19   | 2.424±0.373  | 1.364±1.162  | 5.92E-08 |
| cg27609819 | 2  | 198816177 | PLCL1     | 2.174±0.231  | 1.316±0.949  | 5.92E-08 |
| cg09179845 | 5  | 40909532  | C7        | -1.562±0.338 | -0.59±1.066  | 5.94E-08 |
| cg16474684 | 4  | 2470049   | RNF4      | -3.531±0.384 | -4.029±0.465 | 5.94E-08 |
| cg17727529 | 1  | 156399685 | C1orf61   | -2.772±0.261 | -1.915±0.945 | 5.96E-08 |
| cg06882926 | 17 | 3031354   | OR1G1     | 0.842±0.308  | 0.3±0.564    | 5.97E-08 |
| cg06954481 | 2  | 237076497 | GBX2      | -2.534±1.042 | -1.036±1.473 | 5.99E-08 |
| cg04459030 | 20 | 35885149  | GHRH      | 0.737±0.203  | 0.171±0.62   | 6.04E-08 |
| cg04096767 | 11 | 32449450  | WT1       | -1.36±0.592  | -0.504±0.845 | 6.07E-08 |
| cg14078518 | 4  | 80329284  | GK2       | 3.15±0.233   | 2.413±0.812  | 6.09E-08 |
| cg26521448 | 16 | 11876426  | ZC3H7A    | 3.423±0.467  | 2.639±0.809  | 6.17E-08 |
| cg23699324 | 2  | 79740308  | CTNNA2    | -3.206±0.357 | -2.317±0.969 | 6.18E-08 |
| cg00995065 | 12 | 21283725  | SLCO1B1   | 0.21±0.297   | -0.376±0.623 | 6.21E-08 |
| cg14598387 | 9  | 125289357 | OR1N1     | -0.287±0.221 | -0.951±0.732 | 6.21E-08 |
| cg22843446 | 11 | 123066252 | CLMP      | -4.603±0.393 | -3.716±0.959 | 6.21E-08 |
| cg06117855 | 3  | 45067788  | CLEC3B    | -3.533±0.488 | -2.75±0.801  | 6.25E-08 |
| cg27398547 | 14 | 60952738  | C14orf39  | -1.072±0.536 | -0.331±0.719 | 6.25E-08 |
| cg17884373 | 14 | 60711697  | PPM1A     | 2.035±0.196  | 1.376±0.729  | 6.29E-08 |
| cg02765820 | 3  | 126278020 | C3orf22   | 1.032±0.243  | 0.261±0.852  | 6.34E-08 |
| cg24127989 | 7  | 128049508 | IMPDH1    | -2.863±0.49  | -3.613±0.756 | 6.35E-08 |
| cg08911391 | 1  | 20988590  | DDOST     | -1.226±0.327 | -1.779±0.573 | 6.37E-08 |
| cg02847216 | 18 | 19997803  | CTAGE1    | 2.652±0.316  | 2.172±0.482  | 6.42E-08 |
| cg17449882 | 8  | 67406020  | C8orf46   | 1.847±0.307  | 2.366±0.537  | 6.45E-08 |
| cg06748315 | 21 | 31864089  | KRTAP19-3 | 2.992±0.324  | 2.392±0.633  | 6.45E-08 |
| cg21958798 | 11 | 106890084 | GUCY1A2   | -3.333±0.474 | -2.374±1.025 | 6.46E-08 |
| cg09879869 | 14 | 57734464  | AP5M1     | -1.041±0.377 | -0.36±0.716  | 6.46E-08 |
| cg00973677 | 7  | 136553595 | CHRM2     | -5.323±0.467 | -4.207±1.215 | 6.51E-08 |
| cg26256793 | 1  | 103574469 | COL11A1   | -2.929±0.429 | -2.141±0.83  | 6.53E-08 |
| cg15435730 | 6  | 50680222  | TFAP2D    | -3.948±0.34  | -2.901±1.156 | 6.53E-08 |
| cg14893163 | 13 | 58206036  | PCDH17    | -3.843±0.541 | -2.623±1.322 | 6.56E-08 |
| cg17978274 | 15 | 93013676  | C15orf32  | 2.731±0.168  | 2.012±0.801  | 6.58E-08 |
| cg03770548 | 14 | 23525040  | CDH24     | 1.743±0.237  | 1.265±0.511  | 6.61E-08 |
| cg24870391 | 17 | 32612675  | CCL11     | 1.16±0.257   | 0.465±0.763  | 6.63E-08 |
| cg00420929 | 19 | 18451112  | PGPEP1    | -0.533±0.183 | -1.111±0.64  | 6.68E-08 |
| cg04863713 | 1  | 150521201 | ADAMTSL4  | -3.172±0.316 | -3.811±0.684 | 6.69E-08 |
| cg24623271 | 13 | 100635002 | ZIC2      | -2.778±0.375 | -1.872±0.988 | 6.72E-08 |
| cg07036530 | 10 | 125425262 | GPR26     | -1.107±0.391 | -0.254±0.922 | 6.74E-08 |
| cg12613383 | 1  | 242688681 | PLD5      | -2.277±0.321 | -1.415±0.948 | 6.81E-08 |

|            |    |           |           |              |              |          |
|------------|----|-----------|-----------|--------------|--------------|----------|
| cg26833169 | 11 | 14994045  | CALCA     | -2.988±0.283 | -2.494±0.517 | 6.83E-08 |
| cg06971096 | 2  | 220173591 | PTPRN     | -2.337±0.37  | -1.389±1.039 | 6.83E-08 |
| cg21838334 | 1  | 156646653 | NES       | -3.712±0.583 | -2.687±1.074 | 6.85E-08 |
| cg07408740 | 7  | 44645306  | OGDH      | -0.07±0.24   | -0.632±0.612 | 6.87E-08 |
| cg02374486 | 10 | 72362809  | PRF1      | 1.379±0.254  | 0.981±0.407  | 6.98E-08 |
| cg12067261 | 9  | 5231539   | INSL4     | 2.8±0.189    | 2.036±0.853  | 7.01E-08 |
| cg03803009 | 17 | 72363634  | GPR142    | 1.719±0.203  | 0.983±0.82   | 7.07E-08 |
| cg17872757 | 11 | 128564180 | FLI1      | -5.06±0.545  | -2.861±2.455 | 7.09E-08 |
| cg07153965 | 11 | 125552087 | ACRV1     | 0.433±0.296  | 0.815±0.359  | 7.11E-08 |
| cg07711097 | 8  | 143915954 | GML       | 2.346±0.291  | 1.517±0.916  | 7.18E-08 |
| cg12884406 | 1  | 103573989 | COL11A1   | -2.064±0.247 | -1.539±0.568 | 7.18E-08 |
| cg08753553 | 8  | 7343357   | DEFB106A  | 2.481±0.234  | 2.068±0.433  | 7.20E-08 |
| cg16478145 | 2  | 188419830 | TFPI      | 0.373±0.333  | 0.907±0.55   | 7.21E-08 |
| cg22108265 | 11 | 73471972  | RAB6A     | -4.432±0.381 | -3.635±0.859 | 7.21E-08 |
| cg01281904 | 8  | 54164757  | OPRK1     | -0.19±0.325  | 0.548±0.803  | 7.24E-08 |
| cg21621248 | 2  | 80531842  | LRRTM1    | -3.238±0.573 | -2.096±1.226 | 7.27E-08 |
| cg16220183 | 17 | 56609687  | 42617     | -3.546±0.271 | -2.675±0.968 | 7.27E-08 |
| cg21516287 | 7  | 150020855 | ACTR3C    | -3.523±0.5   | -4.177±0.621 | 7.27E-08 |
| cg10837843 | 5  | 172199244 | DUSP1     | -4.109±0.371 | -4.545±0.383 | 7.32E-08 |
| cg17791651 | 1  | 38513489  | POU3F1    | -1.556±0.437 | -0.631±0.999 | 7.32E-08 |
| cg05062178 | 3  | 124605247 | ITGB5     | -2.17±0.582  | -2.901±0.678 | 7.32E-08 |
| cg03406535 | 1  | 10056957  | RBP7      | -0.91±0.298  | -1.492±0.623 | 7.35E-08 |
| cg00273068 | 20 | 39995747  | EMILIN3   | -2.932±0.378 | -1.99±1.033  | 7.35E-08 |
| cg13301003 | 11 | 32449254  | WT1       | -1.647±0.492 | -0.801±0.886 | 7.39E-08 |
| cg15835825 | 7  | 154862030 | HTR5A     | -4.25±0.479  | -2.802±1.606 | 7.40E-08 |
| cg16387606 | 1  | 149832652 | HIST2H4B  | -4.406±0.252 | -3.001±1.58  | 7.46E-08 |
| cg14409941 | 5  | 178771781 | ADAMTS2   | -5.182±0.916 | -3.391±1.919 | 7.54E-08 |
| cg09009111 | 18 | 2847309   | EMILIN2   | -3.974±0.39  | -2.443±1.713 | 7.54E-08 |
| cg05547500 | 18 | 9885809   | TXNDC2    | 2.508±0.158  | 2.238±0.282  | 7.54E-08 |
| cg11465372 | 12 | 53171191  | KRT76     | 2.455±0.252  | 1.798±0.724  | 7.58E-08 |
| cg14615807 | 1  | 55464173  | BSND      | 1.798±0.257  | 1.33±0.495   | 7.61E-08 |
| cg12005098 | 10 | 91295338  | SLC16A12  | -4.57±0.811  | -2.982±1.703 | 7.62E-08 |
| cg18870231 | 1  | 60539135  | C1orf87   | 1.634±0.232  | 0.949±0.76   | 7.62E-08 |
| cg12640109 | 11 | 62104720  | ASRGL1    | -0.889±0.335 | -1.639±0.817 | 7.67E-08 |
| cg20609368 | 11 | 5257253   | HBD       | 2.917±0.246  | 2.323±0.652  | 7.67E-08 |
| cg25033144 | 19 | 55048290  | KIR3DX1   | 2.652±0.291  | 1.731±1.024  | 7.67E-08 |
| cg21512370 | 13 | 48990327  | LPAR6     | 0.795±0.13   | 0.603±0.193  | 7.67E-08 |
| cg04981492 | 19 | 15218713  | SYDE1     | -2.851±0.37  | -1.791±1.177 | 7.81E-08 |
| cg13461509 | 1  | 53387576  | ECHDC2    | -4.519±0.374 | -4.984±0.43  | 7.85E-08 |
| cg02630888 | 4  | 15657820  | FBXL5     | 1.236±0.236  | 0.586±0.72   | 7.86E-08 |
| cg05163071 | 3  | 108476540 | RETNLB    | 0.493±0.295  | -0.017±0.536 | 7.88E-08 |
| cg12795208 | 12 | 52845938  | KRT6B     | 2.525±0.304  | 1.765±0.837  | 7.88E-08 |
| cg05187322 | 17 | 78152328  | CARD14    | 3.073±0.25   | 2.169±1.012  | 7.91E-08 |
| cg17644208 | 2  | 25142391  | ADCY3     | -0.582±0.111 | -0.739±0.155 | 7.93E-08 |
| cg18182399 | 2  | 220283175 | DES       | -2.497±0.814 | -1.317±1.181 | 7.95E-08 |
| cg08380205 | 3  | 140769691 | SPSB4     | -2.289±0.163 | -1.435±0.962 | 7.96E-08 |
| cg13384396 | 3  | 123167677 | ADCY5     | -2.484±0.306 | -1.572±1.014 | 7.97E-08 |
| cg07845566 | 11 | 134282408 | B3GAT1    | -5.749±0.731 | -4.46±1.362  | 8.06E-08 |
| cg01722450 | 18 | 61816636  | LINC00305 | 2.753±0.314  | 1.854±0.998  | 8.06E-08 |
| cg19461644 | 9  | 101706617 | COL15A1   | -3.455±0.506 | -2.29±1.277  | 8.21E-08 |
| cg02305261 | 20 | 49638967  | KCNG1     | -2.336±0.348 | -1.609±0.789 | 8.26E-08 |
| cg19372178 | 2  | 242126680 | ANO7      | 0.442±0.202  | -0.043±0.533 | 8.29E-08 |
| cg19395441 | 12 | 121454451 | C12orf43  | -3.328±0.289 | -3.738±0.408 | 8.35E-08 |
| cg16372520 | 14 | 78869751  | NRXN3     | -0.537±0.374 | -1.286±0.809 | 8.37E-08 |
| cg15457899 | 11 | 123525665 | SCN3B     | -2.979±0.577 | -1.846±1.221 | 8.38E-08 |
| cg23910835 | 4  | 154710900 | SFRP2     | -4.021±0.352 | -3.248±0.844 | 8.38E-08 |
| cg10954182 | 12 | 104532377 | NFYB      | -1.9±0.221   | -2.527±0.697 | 8.40E-08 |
| cg21783004 | 5  | 135290288 | LECT2     | 1.903±0.275  | 1.533±0.36   | 8.43E-08 |
| cg00616129 | 12 | 10827014  | STYK1     | -3.376±0.506 | -3.973±0.534 | 8.48E-08 |
| cg20373326 | 16 | 82068803  | HSD17B2   | 0.49±0.216   | -0.164±0.73  | 8.55E-08 |
| cg12439773 | 11 | 62752119  | SLC22A6   | 1.492±0.206  | 0.873±0.691  | 8.57E-08 |
| cg04797496 | 5  | 141339086 | PCDH12    | 1.646±0.254  | 1.02±0.692   | 8.67E-08 |
| cg24824840 | 19 | 51219975  | SHANK1    | 2.009±0.289  | 1.236±0.858  | 8.71E-08 |
| cg09794131 | 16 | 71264658  | HYDIN     | -3.588±0.528 | -2.601±1.057 | 8.73E-08 |
| cg27319898 | 7  | 88389003  | ZNF804B   | -3.406±0.462 | -2.237±1.294 | 8.73E-08 |
| cg13266631 | 8  | 24815006  | NEFL      | -3.021±0.362 | -2.096±1.024 | 8.76E-08 |
| cg25577842 | 11 | 32459760  | WT1-AS    | -3.682±0.672 | -2.633±1.081 | 8.78E-08 |

|            |    |           |             |              |              |          |
|------------|----|-----------|-------------|--------------|--------------|----------|
| cg19944367 | 9  | 116223775 | RGS3        | 3.05±0.361   | 2.536±0.513  | 8.79E-08 |
| cg08887581 | 1  | 16330716  | C1orf64     | 0.686±0.293  | 1.432±0.825  | 8.81E-08 |
| cg16358826 | 4  | 46996264  | GABRA4      | -2.839±0.185 | -2.032±0.911 | 8.83E-08 |
| cg19853494 | 1  | 169680613 | SELL        | -1.33±0.333  | -2.075±0.816 | 8.85E-08 |
| cg21003606 | 7  | 71877237  | CALN1       | 3.454±0.316  | 2.953±0.519  | 8.91E-08 |
| cg19982860 | 9  | 21166581  | IFNA21      | 1.626±0.228  | 1.115±0.56   | 8.95E-08 |
| cg10301967 | 6  | 33240022  | RPS18       | -4.827±0.306 | -5.171±0.295 | 9.02E-08 |
| cg21271753 | 22 | 37499451  | TMPRSS6     | -0.54±0.29   | 0.156±0.769  | 9.02E-08 |
| cg17296166 | 19 | 46974567  | PNMAL1      | -3.514±0.512 | -2.393±1.228 | 9.07E-08 |
| cg12967560 | 15 | 100274195 | LYSMD4      | 2.716±0.269  | 1.71±1.134   | 9.08E-08 |
| cg04975920 | 1  | 46646224  | TSPAN1      | -0.472±0.229 | -0.922±0.487 | 9.17E-08 |
| cg06377278 | 1  | 25256369  | RUNX3       | -5.197±0.753 | -2.786±2.706 | 9.19E-08 |
| cg09257092 | 12 | 26986805  | ITPR2       | -4.648±0.307 | -5.045±0.38  | 9.24E-08 |
| cg15870225 | 12 | 56617083  | NABP2       | 2.834±0.266  | 2.373±0.489  | 9.40E-08 |
| cg19883905 | 18 | 12254024  | CIDEA       | -3.206±0.35  | -2.364±0.931 | 9.43E-08 |
| cg03173722 | 4  | 71587640  | RUFY3       | -1.409±0.306 | -0.802±0.658 | 9.50E-08 |
| cg10250107 | 4  | 7940843   | AFAP1       | -4.089±0.674 | -3.171±0.903 | 9.55E-08 |
| cg13365022 | 18 | 58039932  | MC4R        | -3.537±0.503 | -2.661±0.931 | 9.63E-08 |
| cg18729973 | 21 | 43785785  | TFF1        | 1.518±0.205  | 1.02±0.552   | 9.64E-08 |
| cg18137704 | 22 | 17602681  | LOC10096342 | -2.76±0.364  | -2.026±0.798 | 9.64E-08 |
| cg26574610 | 22 | 24095989  | VPREB3      | 1.85±0.324   | 1.243±0.654  | 9.64E-08 |
| cg12120741 | 13 | 78492306  | EDNRB       | -0.301±0.346 | 0.508±0.893  | 9.65E-08 |
| cg09736922 | 3  | 184095976 | THPO        | 1.64±0.291   | 1.145±0.524  | 9.65E-08 |
| cg22218909 | 8  | 6876386   | DEFA1B      | 2.975±0.233  | 2.522±0.49   | 9.65E-08 |
| cg02046532 | 20 | 207858    | DEFB129     | 1.049±0.28   | 0.398±0.719  | 9.68E-08 |
| cg12748258 | 8  | 21988173  | HR          | -4.716±0.78  | -3.14±1.716  | 9.76E-08 |
| cg25527547 | 7  | 100862300 | PLOD3       | 1.862±0.285  | 1.064±0.892  | 9.79E-08 |
| cg14844130 | 22 | 22598937  | VPREB1      | -2.288±0.322 | -2.962±0.737 | 9.79E-08 |
| cg22884082 | 6  | 88039023  | GJB7        | 1.582±0.23   | 0.857±0.815  | 9.84E-08 |
| cg12228229 | 17 | 7122261   | ACADVL      | 1.364±0.239  | 1.786±0.45   | 9.85E-08 |
| cg23029193 | 5  | 38258216  | EGFLAM      | -4.107±0.358 | -3.116±1.108 | 9.85E-08 |
| cg26394380 | 2  | 85896001  | SFTPB       | 0.852±0.239  | 0.298±0.612  | 9.86E-08 |
| cg02500392 | 6  | 138539372 | PBOV1       | 1.952±0.412  | 1.315±0.659  | 9.87E-08 |
| cg09626634 | 13 | 99960369  | GPR183      | -0.415±0.288 | -1.274±0.965 | 9.88E-08 |
| cg06575572 | 22 | 45705265  | FAM118A     | -1.24±0.312  | -1.83±0.638  | 9.89E-08 |
| cg21870668 | 15 | 25123731  | SNRPN       | -0.459±0.349 | 0.117±0.598  | 9.93E-08 |
| cg10148841 | 11 | 124767455 | ROBO4       | 0.715±0.196  | 1.201±0.54   | 9.93E-08 |
| cg01169778 | 9  | 136038690 | GBGT1       | 0.873±0.384  | 1.504±0.664  | 1.00E-07 |
| cg21570818 | 19 | 5870366   | FUT5        | 1.843±0.356  | 1.081±0.836  | 1.00E-07 |
| cg22396755 | 1  | 21995097  | RAP1GAP     | -3.453±0.525 | -2.179±1.413 | 1.01E-07 |
| cg24447890 | 15 | 75105144  | LMAN1L      | 1.023±0.297  | 1.594±0.618  | 1.01E-07 |
| cg01909245 | 11 | 1873757   | LSP1        | 2.347±0.414  | 1.735±0.625  | 1.01E-07 |
| cg20134215 | 6  | 100441407 | LOC728012   | -2.2±0.389   | -1.304±0.99  | 1.01E-07 |
| cg17255302 | 12 | 52828461  | KRT75       | 1.701±0.336  | 0.991±0.779  | 1.01E-07 |
| cg19784470 | 19 | 15052011  | OR7C2       | 2.075±0.248  | 1.522±0.61   | 1.02E-07 |
| cg10994126 | 1  | 176432498 | PAPPA2      | 0.005±0.24   | -0.611±0.687 | 1.02E-07 |
| cg17773950 | 11 | 2161598   | IGF2-AS     | -4.181±0.449 | -3.202±1.078 | 1.02E-07 |
| cg24068372 | 7  | 151107261 | WDR86       | -4.151±0.705 | -2.642±1.659 | 1.03E-07 |
| cg10362591 | 16 | 55689865  | SLC6A2      | -2.97±0.906  | -1.492±1.553 | 1.04E-07 |
| cg11412582 | 15 | 28567519  | HERC2       | -0.888±0.528 | -0.329±0.447 | 1.04E-07 |
| cg00935388 | 14 | 21525319  | RNASE8      | 3.541±0.251  | 3.188±0.354  | 1.04E-07 |
| cg04563996 | 3  | 57093519  | SPATA12     | 0.253±0.36   | -0.235±0.481 | 1.05E-07 |
| cg02497758 | 20 | 39317194  | MAFB        | -2.143±0.632 | -1.086±1.118 | 1.05E-07 |
| cg20330472 | 6  | 133561932 | EYA4        | -3.764±0.378 | -2.418±1.524 | 1.06E-07 |
| cg13603171 | 6  | 132723164 | MOXD1       | -1.787±0.328 | -0.873±1.025 | 1.06E-07 |
| cg25799433 | 20 | 1600623   | SIRPB1      | -1.206±0.254 | -1.82±0.683  | 1.06E-07 |
| cg14850026 | 1  | 62660191  | L1TD1       | 1.283±0.213  | 1.738±0.501  | 1.07E-07 |
| cg02903525 | 19 | 47813489  | C5AR1       | 1.675±0.198  | 1.174±0.56   | 1.08E-07 |
| cg11934695 | 20 | 4230092   | ADRA1D      | -3.039±0.736 | -1.908±1.172 | 1.08E-07 |
| cg10576828 | 1  | 70225863  | LRRC7       | 2.605±0.247  | 1.893±0.8    | 1.08E-07 |
| cg26232187 | 15 | 88799300  | NTRK3       | -5.743±0.531 | -4.411±1.486 | 1.08E-07 |
| cg01906717 | 9  | 21368203  | IFNA13      | 1.437±0.335  | 0.906±0.556  | 1.08E-07 |
| cg13270853 | 12 | 133435649 | CHFR        | 3.134±0.666  | 3.902±0.682  | 1.08E-07 |
| cg03780486 | 11 | 6817280   | OR6A2       | 1.118±0.241  | 0.416±0.79   | 1.09E-07 |
| cg02121427 | 3  | 194091192 | LRRC15      | 0.16±0.246   | -0.582±0.836 | 1.09E-07 |
| cg10412312 | 12 | 25705861  | IFLTD1      | 1.625±0.294  | 0.906±0.801  | 1.10E-07 |
| cg18389810 | 14 | 21498887  | TPPP2       | 2.889±0.288  | 2.164±0.811  | 1.10E-07 |

|            |    |           |          |              |              |          |
|------------|----|-----------|----------|--------------|--------------|----------|
| cg07882535 | 11 | 2445392   | TRPM5    | 2.352±0.175  | 1.926±0.475  | 1.11E-07 |
| cg22593486 | 19 | 15918609  | OR10H1   | 5.636±0.26   | 5.089±0.602  | 1.11E-07 |
| cg20059312 | 2  | 233877857 | NGEF     | 3.773±0.23   | 2.88±1.016   | 1.11E-07 |
| cg18829411 | 21 | 40722023  | HMGN1    | -0.292±0.312 | -1.001±0.786 | 1.12E-07 |
| cg17256157 | 6  | 142410100 | NMBR     | -3.842±0.33  | -2.885±1.078 | 1.12E-07 |
| cg11285003 | 5  | 45696592  | HCN1     | -3.423±0.478 | -2.25±1.309  | 1.12E-07 |
| cg01474260 | 22 | 17073884  | CCT8L2   | 0.793±0.181  | 0.138±0.744  | 1.12E-07 |
| cg07485777 | 4  | 165952835 | TRIM60   | 3.284±0.22   | 2.95±0.346   | 1.13E-07 |
| cg02641676 | 8  | 42397764  | SLC20A2  | -0.059±0.239 | -0.523±0.506 | 1.14E-07 |
| cg26153631 | 12 | 54379056  | HOXC10   | -0.965±0.147 | -0.266±0.799 | 1.14E-07 |
| cg13448625 | 10 | 105845238 | COL17A1  | 2.223±0.33   | 1.484±0.82   | 1.15E-07 |
| cg22373112 | 17 | 40307717  | RAB5C    | -0.409±0.248 | 0.154±0.625  | 1.16E-07 |
| cg17376813 | 19 | 750024    | MISP     | 1.514±0.249  | 1.935±0.449  | 1.17E-07 |
| cg20103550 | 14 | 44976457  | FSCB     | 1.355±0.333  | 0.771±0.626  | 1.17E-07 |
| cg27065979 | 13 | 52734134  | NEK3     | 0.278±0.342  | 1.224±1.066  | 1.18E-07 |
| cg00539322 | 2  | 234216360 | SAG      | 0.396±0.27   | 0.836±0.465  | 1.18E-07 |
| cg26151675 | 1  | 24240069  | CNR2     | -0.208±0.398 | -0.994±0.861 | 1.18E-07 |
| cg00318573 | 20 | 61993118  | CHRNA4   | -1.493±0.293 | -0.756±0.826 | 1.19E-07 |
| cg18636558 | 3  | 121613703 | SLC15A2  | -1.084±0.381 | -0.366±0.781 | 1.19E-07 |
| cg22131691 | 7  | 32110988  | PDE1C    | -3.508±0.585 | -2.37±1.244  | 1.19E-07 |
| cg00319692 | 8  | 87111119  | ATP6V0D2 | 1.105±0.214  | 0.41±0.789   | 1.19E-07 |
| cg07259382 | 4  | 164536228 | 42430    | 2.409±0.29   | 1.518±1.01   | 1.20E-07 |
| cg01917648 | 12 | 101871337 | SPIC     | 1.291±0.238  | 0.823±0.513  | 1.21E-07 |
| cg19370451 | 1  | 152386561 | CRNN     | 2.3±0.231    | 1.376±1.056  | 1.21E-07 |
| cg01601573 | 4  | 144256835 | GAB1     | -0.23±0.273  | -0.718±0.528 | 1.22E-07 |
| cg15078027 | 19 | 13858619  | CCDC130  | -3.011±1.853 | -4.987±1.62  | 1.22E-07 |
| cg15461516 | 11 | 45686369  | CHST1    | -4.88±0.617  | -3.529±1.5   | 1.23E-07 |
| cg18328334 | 2  | 218808652 | TNS1     | -1.561±0.432 | -0.773±0.854 | 1.23E-07 |
| cg21309147 | 17 | 37382234  | STAC2    | -3.975±0.673 | -2.643±1.462 | 1.23E-07 |
| cg08997253 | 9  | 104500729 | GRIN3A   | -3.465±0.606 | -2.359±1.199 | 1.24E-07 |
| cg00594952 | 1  | 41130641  | RIMS3    | 0.839±0.273  | 1.454±0.685  | 1.25E-07 |
| cg10500909 | 8  | 144000015 | CYP11B2  | 1.191±0.271  | 0.535±0.735  | 1.25E-07 |
| cg04498511 | 1  | 203768441 | ZBED6    | 1.88±0.258   | 2.288±0.43   | 1.25E-07 |
| cg07109287 | 9  | 126774073 | LHX2     | -2.733±0.594 | -1.295±1.611 | 1.25E-07 |
| cg06563300 | 12 | 100750811 | SLC17A8  | -2.206±0.353 | -1.177±1.165 | 1.26E-07 |
| cg16173109 | 2  | 242945447 | 0        | 2.203±0.379  | 1.403±0.886  | 1.26E-07 |
| cg09227563 | 19 | 54984705  | CDC42EP5 | -4.329±0.463 | -3.199±1.267 | 1.26E-07 |
| cg15883716 | 1  | 173638701 | ANKRD45  | -3.663±0.357 | -2.738±1.042 | 1.26E-07 |
| cg10612997 | 2  | 11673928  | GREB1    | 1.394±0.258  | 0.758±0.714  | 1.26E-07 |
| cg03400060 | 5  | 78365801  | BHMT2    | -0.51±0.323  | 0.079±0.64   | 1.27E-07 |
| cg26705553 | 16 | 3096711   | MMP25    | -4.684±0.515 | -3.349±1.504 | 1.27E-07 |
| cg24736099 | 20 | 9077730   | PLCB4    | 1.937±0.303  | 1.257±0.757  | 1.28E-07 |
| cg17347634 | 8  | 65711916  | CYP7B1   | -0.126±0.286 | -0.867±0.834 | 1.29E-07 |
| cg17173856 | 11 | 88782137  | GRM5     | 1.327±0.322  | 0.617±0.79   | 1.29E-07 |
| cg02701137 | 20 | 34994743  | DLGAP4   | 1.866±0.247  | 1.508±0.367  | 1.29E-07 |
| cg10746737 | 6  | 32498604  | HLA-DRB5 | 2.035±0.436  | 1.328±0.749  | 1.29E-07 |
| cg13847070 | 5  | 137071523 | KLHL3    | -2.652±0.424 | -1.619±1.159 | 1.29E-07 |
| cg22594309 | 1  | 202679504 | SYT2     | -4.736±0.652 | -3.16±1.768  | 1.29E-07 |
| cg15604467 | 13 | 79177925  | POU4F1   | -4.823±0.405 | -3.115±1.959 | 1.31E-07 |
| cg19546781 | 16 | 57438715  | CCL17    | 2.919±0.29   | 2.455±0.491  | 1.31E-07 |
| cg22960952 | 4  | 76481169  | C4orf26  | 0.142±0.278  | -0.47±0.682  | 1.31E-07 |
| cg23382741 | 15 | 41121320  | PPP1R14D | 1.906±0.191  | 1.159±0.856  | 1.32E-07 |
| cg02641560 | 1  | 24828811  | RCAN3    | -4.599±0.253 | -4.864±0.215 | 1.33E-07 |
| cg00344372 | 4  | 3443625   | HGFAC    | 1.84±0.231   | 1.319±0.581  | 1.33E-07 |
| cg20881054 | 14 | 77228508  | VASH1    | -4.828±0.525 | -3.488±1.511 | 1.33E-07 |
| cg04616963 | 1  | 168545592 | XCL1     | -0.022±0.216 | -0.574±0.623 | 1.34E-07 |
| cg24995381 | 7  | 37780156  | GPR141   | 3.185±0.168  | 2.469±0.822  | 1.35E-07 |
| cg19385139 | 13 | 110958361 | COL4A1   | -1.388±0.188 | -0.958±0.482 | 1.35E-07 |
| cg03608577 | 6  | 29342679  | OR12D3   | 1.813±0.238  | 1.098±0.813  | 1.35E-07 |
| cg22063989 | 1  | 38100795  | RSPO1    | -4.504±0.572 | -3.338±1.289 | 1.35E-07 |
| cg13605690 | 2  | 169746671 | SPC25    | -4.042±1.033 | -5.028±0.645 | 1.36E-07 |
| cg10061138 | 3  | 52529085  | STAB1    | 0.074±0.155  | 0.526±0.513  | 1.36E-07 |
| cg01971122 | 11 | 14993929  | CALCA    | -3.17±0.374  | -2.557±0.654 | 1.36E-07 |
| cg22116290 | 16 | 68481968  | SMPD3    | -3.113±0.312 | -2.649±0.481 | 1.37E-07 |
| cg08003150 | 20 | 62103627  | KCNQ2    | -5.459±0.469 | -3.822±1.874 | 1.37E-07 |
| cg24488435 | 12 | 54583029  | SMUG1    | -4.131±0.274 | -4.473±0.328 | 1.37E-07 |
| cg18807515 | 1  | 12916315  | PRAMEF2  | 1.368±0.194  | 0.697±0.759  | 1.37E-07 |

|            |    |           |           |              |              |          |
|------------|----|-----------|-----------|--------------|--------------|----------|
| cg25604883 | 1  | 77747387  | AK5       | -3.936±0.56  | -2.767±1.298 | 1.37E-07 |
| cg03504701 | 5  | 19980857  | CDH18     | 2.304±0.169  | 1.514±0.911  | 1.39E-07 |
| cg25725843 | 2  | 107504169 | ST6GAL2   | -2.15±0.383  | -1.254±1.006 | 1.39E-07 |
| cg07123069 | 12 | 54367250  | HOXC11    | -2.673±0.379 | -1.351±1.515 | 1.40E-07 |
| cg25839766 | 19 | 43385077  | PSG1      | 1.699±0.171  | 1.019±0.781  | 1.40E-07 |
| cg21639401 | 17 | 41050668  | LINC00671 | 1.869±0.209  | 1.411±0.511  | 1.40E-07 |
| cg22858308 | 6  | 143095613 | HIVEP2    | 3.185±0.397  | 2.583±0.63   | 1.42E-07 |
| cg20286200 | 6  | 133562267 | EYA4      | -3.024±0.341 | -1.917±1.266 | 1.42E-07 |
| cg00498305 | 10 | 119000236 | SLC18A2   | -1.689±0.419 | -0.962±0.786 | 1.42E-07 |
| cg12278770 | 1  | 32712780  | FAM167B   | -0.064±0.325 | 0.635±0.78   | 1.44E-07 |
| cg22294577 | 7  | 107444728 | SLC26A3   | 2.124±0.279  | 1.33±0.904   | 1.44E-07 |
| cg20090467 | 9  | 67927004  | ANKRD20A3 | -0.107±0.162 | 0.072±0.156  | 1.44E-07 |
| cg25226014 | 3  | 45984942  | CXCR6     | 1.054±0.339  | 0.558±0.513  | 1.45E-07 |
| cg22578204 | 22 | 33197952  | TIMP3     | -2.926±0.929 | -1.745±1.15  | 1.46E-07 |
| cg01753906 | 14 | 106140190 | ELK2AP    | 1.162±0.207  | 0.808±0.383  | 1.46E-07 |
| cg24711914 | 18 | 28956567  | DSG4      | 1.086±0.338  | 0.616±0.472  | 1.46E-07 |
| cg03963654 | 4  | 141177084 | SCOC      | 3.024±0.302  | 2.647±0.363  | 1.46E-07 |
| cg03856801 | 11 | 116709138 | APOA1     | 4.007±0.232  | 3.464±0.611  | 1.47E-07 |
| cg02593766 | 17 | 48608677  | EPN3      | 1.753±0.314  | 1.093±0.735  | 1.47E-07 |
| cg00840516 | 3  | 50360097  | HYAL2     | -0.115±0.222 | 0.383±0.559  | 1.47E-07 |
| cg25781162 | 2  | 44065996  | ABCG5     | 1.972±0.28   | 2.461±0.53   | 1.48E-07 |
| cg02126753 | 7  | 44143998  | AEBP1     | -3.849±0.471 | -2.394±1.664 | 1.48E-07 |
| cg04569804 | 5  | 149493814 | CSF1R     | 2.067±0.211  | 1.609±0.513  | 1.49E-07 |
| cg12439899 | 6  | 10415232  | TFAP2A    | -3.326±0.431 | -2.05±1.457  | 1.49E-07 |
| cg10478221 | 16 | 679917    | WFIKK1    | 0.313±0.253  | 0.816±0.557  | 1.49E-07 |
| cg13686115 | 10 | 60936626  | PHYHIPL   | -3.571±0.398 | -2.641±1.047 | 1.50E-07 |
| cg12584718 | 7  | 100028402 | MEPCE     | -1.962±0.27  | -1.01±1.094  | 1.50E-07 |
| cg17950095 | 7  | 27224700  | HOXA11    | -1.311±0.225 | -0.39±1.063  | 1.50E-07 |
| cg12792011 | 19 | 58661915  | ZNF329    | -4.964±0.43  | -3.139±2.107 | 1.51E-07 |
| cg26783856 | 1  | 90287523  | LRR8D     | -3.235±0.257 | -3.626±0.411 | 1.51E-07 |
| cg22130834 | 1  | 55267046  | TTC22     | -4.355±0.59  | -5.01±0.575  | 1.51E-07 |
| cg24723331 | 12 | 22487219  | ST8SIA1   | -4.572±0.423 | -3.082±1.714 | 1.51E-07 |
| cg02212280 | 11 | 102670192 | MMP1      | 1.467±0.4    | 1.997±0.529  | 1.53E-07 |
| cg15081561 | 18 | 66504226  | CCDC102B  | 2.561±0.165  | 2.071±0.561  | 1.53E-07 |
| cg11981631 | 11 | 17497967  | ABCC8     | -4.121±0.423 | -3.042±1.224 | 1.53E-07 |
| cg06489008 | 20 | 23433349  | CST11     | 1.168±0.182  | 0.39±0.899   | 1.54E-07 |
| cg06852744 | 7  | 44142973  | AEBP1     | 3.053±0.251  | 2.461±0.669  | 1.54E-07 |
| cg09313439 | 18 | 25757211  | CDH2      | -3.226±0.624 | -2.121±1.205 | 1.54E-07 |
| cg14893129 | 17 | 78152051  | CARD14    | 2.926±0.202  | 2.024±1.044  | 1.54E-07 |
| cg16112945 | 9  | 136285806 | ADAMTS13  | 1.106±0.341  | 0.472±0.697  | 1.55E-07 |
| cg14620221 | 11 | 124310939 | OR8B8     | 1.625±0.307  | 0.71±1.047   | 1.55E-07 |
| cg15479752 | 19 | 35940862  | FFAR2     | 3.219±0.285  | 2.215±1.156  | 1.55E-07 |
| cg15310162 | 21 | 37852822  | CLDN14    | 0.701±0.243  | 1.155±0.5    | 1.55E-07 |
| cg20507276 | 1  | 248100600 | OR2L13    | -1.871±1.423 | -0.408±1.162 | 1.55E-07 |
| cg11151665 | 19 | 43421584  | PSG6      | 2.153±0.24   | 1.644±0.57   | 1.57E-07 |
| cg22631938 | 3  | 71802420  | GPR27     | -1.503±0.304 | -0.595±1.04  | 1.57E-07 |
| cg13461622 | 1  | 25291385  | RUNX3     | 0.502±0.424  | -0.179±0.727 | 1.57E-07 |
| cg01355739 | 20 | 57416888  | GNAS      | 1.156±0.156  | 1.556±0.455  | 1.58E-07 |
| cg20339650 | 11 | 2160882   | IGF2      | -2.25±0.43   | -1.367±0.985 | 1.59E-07 |
| cg21880903 | 4  | 39408665  | KLB       | -0.599±0.4   | 0.229±0.925  | 1.59E-07 |
| cg15550350 | 3  | 141497168 | GRK7      | 3.081±0.219  | 2.764±0.329  | 1.60E-07 |
| cg14386061 | 8  | 21771446  | DOK2      | 0.468±0.392  | -0.225±0.757 | 1.61E-07 |
| cg18087514 | 1  | 241696246 | KMO       | 0.564±0.389  | -0.244±0.903 | 1.61E-07 |
| cg17020834 | 5  | 152870258 | GRIA1     | -3.466±0.618 | -2.153±1.471 | 1.61E-07 |
| cg24532476 | 12 | 133424566 | CHFR      | 1.894±0.193  | 2.222±0.355  | 1.61E-07 |
| cg00030047 | 1  | 6268790   | RNF207    | 0.034±0.341  | 0.821±0.889  | 1.61E-07 |
| cg01351032 | 16 | 10971191  | CIITA     | 0.189±0.355  | -0.729±1.044 | 1.62E-07 |
| cg26647600 | 3  | 39369720  | CCR8      | 1.932±0.446  | 1.186±0.805  | 1.62E-07 |
| cg07980518 | 18 | 59560394  | RNF152    | -4.411±0.405 | -3.247±1.333 | 1.62E-07 |
| cg08896053 | 8  | 50823468  | SNTG1     | -3.914±0.44  | -2.986±1.04  | 1.63E-07 |
| cg00544557 | 21 | 39578742  | DSCR10    | 2.988±0.287  | 2.387±0.672  | 1.63E-07 |
| cg07693270 | 3  | 186856928 | RPL39L    | 0.121±0.276  | -0.608±0.831 | 1.64E-07 |
| cg17124700 | 1  | 182642748 | RGS8      | 2.189±0.252  | 1.48±0.812   | 1.64E-07 |
| cg25985778 | 17 | 72199373  | RPL38     | -3.636±0.385 | -4.061±0.373 | 1.65E-07 |
| cg02815516 | 19 | 11306319  | KANK2     | 0.22±0.22    | 0.615±0.434  | 1.66E-07 |
| cg19210770 | 2  | 220379091 | ASIC4     | -4.089±0.56  | -2.787±1.472 | 1.66E-07 |
| cg11846968 | 20 | 31823545  | BPIFA1    | 1.337±0.273  | 0.595±0.849  | 1.66E-07 |

|            |    |           |                  |              |              |          |
|------------|----|-----------|------------------|--------------|--------------|----------|
| cg25084878 | 5  | 127873711 | <i>FBN2</i>      | -1.365±0.392 | -0.5±0.974   | 1.67E-07 |
| cg13770446 | 1  | 16349792  | <i>CLCNKA</i>    | 2.02±0.261   | 1.45±0.641   | 1.67E-07 |
| cg13703437 | 5  | 39219698  | <i>FYB</i>       | 0.697±0.331  | -0.134±0.946 | 1.67E-07 |
| cg11414151 | 4  | 185747826 | <i>ACSL1</i>     | -3.277±0.347 | -3.822±0.581 | 1.68E-07 |
| cg17718302 | 6  | 27858637  | <i>HIST1H3J</i>  | -4.712±0.44  | -2.907±2.093 | 1.68E-07 |
| cg09432376 | 22 | 36044226  | <i>APOL6</i>     | -1.24±0.294  | -1.967±0.826 | 1.69E-07 |
| cg22289837 | 8  | 86350278  | <i>CA3</i>       | -1.325±0.239 | -0.62±0.81   | 1.70E-07 |
| cg22797169 | 2  | 102803407 | <i>IL1RL2</i>    | 0.448±0.181  | -0.135±0.672 | 1.71E-07 |
| cg09137696 | 16 | 56672415  | <i>MT1A</i>      | -3.807±0.559 | -2.656±1.289 | 1.71E-07 |
| cg24975564 | 12 | 20522236  | <i>PDE3A</i>     | -4.968±0.727 | -3.6±1.514   | 1.71E-07 |
| cg06906435 | 14 | 99177777  | <i>C14orf177</i> | 0.67±0.294   | -0.084±0.86  | 1.71E-07 |
| cg17982671 | 19 | 39735568  | <i>IFNL3</i>     | 1.16±0.249   | 1.644±0.538  | 1.72E-07 |
| cg24264578 | 16 | 3405902   | <i>OR2C1</i>     | 3.32±0.233   | 2.839±0.54   | 1.72E-07 |
| cg21142272 | 16 | 67224341  | <i>EXOC3L1</i>   | -0.288±0.245 | 0.254±0.611  | 1.74E-07 |
| cg01705587 | 1  | 149889364 | <i>SV2A</i>      | -4.667±0.521 | -3.069±1.842 | 1.75E-07 |
| cg04533291 | 2  | 96930398  | <i>TMEM127</i>   | 3.358±0.258  | 3.878±0.582  | 1.75E-07 |
| cg12422450 | 14 | 93389891  | <i>CHGA</i>      | -2.596±0.401 | -1.397±1.38  | 1.76E-07 |
| cg06222800 | 21 | 32127416  | <i>0</i>         | 1.947±0.305  | 1.313±0.711  | 1.76E-07 |
| cg04996020 | 7  | 107443898 | <i>SLC26A3</i>   | 0.865±0.295  | 0.124±0.844  | 1.77E-07 |
| cg22040627 | 17 | 6617030   | <i>SLC13A5</i>   | -3.807±0.58  | -2.719±1.205 | 1.78E-07 |
| cg02222362 | 10 | 48828109  | <i>PTPN20B</i>   | 0.378±0.509  | 1.009±0.612  | 1.78E-07 |
| cg19221369 | 1  | 109618856 | <i>TAF13</i>     | -2.855±0.307 | -3.45±0.663  | 1.81E-07 |
| cg07427065 | 7  | 130130596 | <i>MESTIT1</i>   | 0.562±0.116  | 0.941±0.438  | 1.83E-07 |
| cg18408326 | 10 | 18429037  | <i>CACNB2</i>    | -3.361±0.392 | -2.576±0.878 | 1.83E-07 |
| cg20256783 | 12 | 52827847  | <i>KRT75</i>     | 2.625±0.213  | 2.034±0.679  | 1.83E-07 |
| cg21269897 | 6  | 27107002  | <i>HIST1H4I</i>  | -2.425±0.302 | -1.49±1.08   | 1.83E-07 |
| cg09513026 | 5  | 137419242 | <i>WNT8A</i>     | 2.27±0.204   | 1.963±0.324  | 1.84E-07 |
| cg27418851 | 10 | 54531653  | <i>MBL2</i>      | 1.39±0.217   | 0.747±0.742  | 1.85E-07 |
| cg13823791 | 17 | 17184990  | <i>COPS3</i>     | -2.585±0.364 | -3.232±0.712 | 1.85E-07 |
| cg04478795 | 7  | 128828120 | <i>SMO</i>       | -2.934±0.437 | -1.832±1.261 | 1.88E-07 |
| cg05973262 | 6  | 32191895  | <i>NOTCH4</i>    | 0.013±0.205  | 0.6±0.676    | 1.88E-07 |
| cg07478122 | 15 | 25230421  | <i>PWAR5</i>     | 1.421±0.226  | 0.862±0.638  | 1.88E-07 |
| cg14137939 | 11 | 85397109  | <i>CCDC89</i>    | -0.161±0.251 | 0.465±0.715  | 1.88E-07 |
| cg20017995 | 9  | 136216076 | <i>SNORD24</i>   | 0.743±0.267  | 0.211±0.595  | 1.89E-07 |
| cg00623593 | 10 | 128767610 | <i>DOCK1</i>     | 2.957±0.185  | 2.553±0.457  | 1.89E-07 |
| cg11653858 | 17 | 26799289  | <i>SLC13A2</i>   | 0.837±0.292  | 1.383±0.606  | 1.89E-07 |
| cg19857541 | 3  | 108836800 | <i>MORC1</i>     | 3.891±0.261  | 2.81±1.26    | 1.90E-07 |
| cg11052143 | 2  | 202484020 | <i>ALS2CR11</i>  | -1.158±0.419 | -0.419±0.813 | 1.90E-07 |
| cg14070647 | 8  | 109095264 | <i>RSPO2</i>     | -3.295±0.452 | -2.12±1.348  | 1.90E-07 |
| cg17240454 | 6  | 34524278  | <i>SPDEF</i>     | 1.553±0.231  | 0.945±0.698  | 1.91E-07 |
| cg07102705 | 5  | 148033896 | <i>HTR4</i>      | -2.999±0.863 | -1.828±1.198 | 1.92E-07 |
| cg10281478 | 7  | 95402528  | <i>DYNC1I1</i>   | -1.053±0.163 | -0.61±0.509  | 1.93E-07 |
| cg07651242 | 7  | 45614720  | <i>ADCY1</i>     | -3.153±0.513 | -1.932±1.394 | 1.93E-07 |
| cg22886089 | 15 | 51973591  | <i>SCG3</i>      | -4.731±0.558 | -3.323±1.613 | 1.93E-07 |
| cg09971646 | 14 | 101194145 | <i>DLK1</i>      | -1.184±0.353 | -0.509±0.754 | 1.94E-07 |
| cg12539975 | 9  | 133539583 | <i>PRDM12</i>    | -3.446±0.388 | -2.501±1.081 | 1.95E-07 |
| cg02679745 | 9  | 139927646 | <i>FUT7</i>      | 1.156±0.343  | 0.487±0.749  | 1.95E-07 |
| cg02906939 | 2  | 138721315 | <i>HNMT</i>      | 2.618±0.294  | 1.446±1.367  | 1.96E-07 |
| cg15649193 | 19 | 14640403  | <i>TECR</i>      | -4.142±0.364 | -3.689±0.444 | 1.96E-07 |
| cg26580095 | 1  | 92545650  | <i>BTBD8</i>     | -1.022±0.222 | -1.541±0.592 | 1.97E-07 |
| cg16301617 | 17 | 76128906  | <i>TMC6</i>      | 0.371±0.315  | -0.137±0.55  | 1.97E-07 |
| cg02071074 | 13 | 52585283  | <i>ATP7B</i>     | -3.114±0.28  | -2.36±0.869  | 1.98E-07 |
| cg00846036 | 11 | 84634126  | <i>DLG2</i>      | -0.298±0.297 | 0.379±0.771  | 1.99E-07 |
| cg24417499 | 1  | 33351653  | <i>HPCA</i>      | -2.54±0.331  | -1.817±0.819 | 1.99E-07 |
| cg01407341 | 15 | 97326798  | <i>SPATA8</i>    | 3.065±0.266  | 2.554±0.572  | 2.00E-07 |
| cg06434428 | 5  | 83016630  | <i>HAPLN1</i>    | 1.99±0.236   | 1.554±0.485  | 2.00E-07 |
| cg13858139 | 19 | 22019044  | <i>ZNF43</i>     | -3.18±0.285  | -2.601±0.652 | 2.01E-07 |
| cg26879282 | 11 | 2817991   | <i>KCNQ1</i>     | 3.977±0.278  | 3.304±0.77   | 2.01E-07 |
| cg10634115 | 17 | 80330743  | <i>UTS2R</i>     | -0.547±0.21  | 0.072±0.717  | 2.02E-07 |
| cg10457247 | 8  | 70983079  | <i>PRDM14</i>    | -3.206±0.298 | -2.263±1.094 | 2.02E-07 |
| cg21093060 | 1  | 32644693  | <i>TXLNA</i>     | 2.18±0.31    | 1.578±0.675  | 2.03E-07 |
| cg04582295 | 17 | 48242070  | <i>SGCA</i>      | 1.677±0.225  | 1.164±0.585  | 2.03E-07 |
| cg24322623 | 11 | 17740430  | <i>MYOD1</i>     | -3.906±0.491 | -2.822±1.232 | 2.04E-07 |
| cg00925717 | 16 | 23313148  | <i>SCNN1B</i>    | -2.634±0.32  | -1.85±0.899  | 2.04E-07 |
| cg01119135 | 1  | 207205525 | <i>C1orf116</i>  | 0.754±0.302  | -0.104±0.992 | 2.05E-07 |
| cg26369642 | 8  | 58987333  | <i>FAM110B</i>   | 2.597±0.209  | 1.9±0.811    | 2.05E-07 |
| cg20530314 | 3  | 148415511 | <i>AGTR1</i>     | -3.88±0.449  | -2.436±1.678 | 2.05E-07 |

|            |    |           |                    |              |              |          |
|------------|----|-----------|--------------------|--------------|--------------|----------|
| cg13446622 | 12 | 57328406  | <i>SDR9C7</i>      | 1.857±0.249  | 1.316±0.615  | 2.05E-07 |
| cg14724613 | 7  | 86273429  | <i>GRM3</i>        | -4.262±0.304 | -3.303±1.114 | 2.05E-07 |
| cg18982568 | 12 | 53097169  | <i>KRT77</i>       | 1.82±0.284   | 1.006±0.943  | 2.07E-07 |
| cg07890954 | 15 | 72102874  | <i>NR2E3</i>       | 3.694±0.177  | 2.917±0.911  | 2.08E-07 |
| cg04452713 | 6  | 56707687  | <i>DST</i>         | -1.38±0.323  | -2.179±0.917 | 2.08E-07 |
| cg19928046 | 5  | 149792249 | <i>CD74</i>        | -4.54±0.403  | -5.29±0.836  | 2.08E-07 |
| cg16983159 | 5  | 138862441 | <i>TMEM173</i>     | -4.036±0.555 | -3.055±1.086 | 2.11E-07 |
| cg13284426 | 5  | 176732122 | <i>PRELID1</i>     | 1.689±0.269  | 1.096±0.675  | 2.12E-07 |
| cg12014417 | 12 | 123187920 | <i>HCAR2</i>       | 0.071±0.387  | -0.774±0.961 | 2.12E-07 |
| cg08141873 | 11 | 534632    | <i>HRAS</i>        | -2.41±0.306  | -3.111±0.801 | 2.14E-07 |
| cg13334990 | 12 | 7023763   | <i>ENO2</i>        | -1.039±0.386 | -0.494±0.57  | 2.14E-07 |
| cg12285118 | 10 | 14816973  | <i>FAM107B</i>     | 1.578±0.272  | 1.206±0.384  | 2.14E-07 |
| cg14182690 | 1  | 25290947  | <i>RUNX3</i>       | 1.615±0.333  | 0.951±0.749  | 2.15E-07 |
| cg08434234 | 7  | 137531173 | <i>DGKI</i>        | -4.624±0.66  | -3.248±1.559 | 2.15E-07 |
| cg20033731 | 12 | 2161371   | <i>CACNA1C</i>     | -3.729±0.433 | -2.928±0.893 | 2.16E-07 |
| cg00204262 | 19 | 39323158  | <i>ECH1</i>        | 1.726±0.341  | 1.026±0.792  | 2.16E-07 |
| cg19841506 | 17 | 4642056   | <i>CXCL16</i>      | -3.311±0.336 | -3.813±0.535 | 2.16E-07 |
| cg16555388 | 3  | 172241216 | <i>TNFSF10</i>     | -2.953±0.272 | -3.352±0.423 | 2.19E-07 |
| cg05556717 | 7  | 75419304  | <i>CCL26</i>       | -0.221±0.242 | 0.353±0.659  | 2.20E-07 |
| cg05360265 | 6  | 147525477 | <i>STXBP5</i>      | -3.82±0.415  | -3.337±0.456 | 2.20E-07 |
| cg08528984 | 1  | 2985218   | <i>PRDM16</i>      | -4.321±0.956 | -2.945±1.45  | 2.21E-07 |
| cg03544379 | 19 | 15052824  | <i>OR7C2</i>       | 1.132±0.219  | 0.488±0.749  | 2.21E-07 |
| cg18815943 | 1  | 47882314  | <i>FOXE3</i>       | -3.699±0.863 | -2.133±1.745 | 2.23E-07 |
| cg24977027 | 2  | 88469347  | <i>THNSL2</i>      | 2.112±0.393  | 1.237±0.999  | 2.25E-07 |
| cg03317245 | 17 | 3600514   | <i>P2RX5</i>       | 0.797±0.227  | 1.266±0.532  | 2.26E-07 |
| cg12619162 | 10 | 43867155  | <i>FXYP4</i>       | 0.997±0.257  | 0.284±0.827  | 2.28E-07 |
| cg22879289 | 1  | 236237743 | <i>0</i>           | 0.366±0.302  | -0.27±0.723  | 2.28E-07 |
| cg03977657 | 1  | 209825747 | <i>LAMB3</i>       | 0.714±0.272  | 0.152±0.637  | 2.29E-07 |
| cg07237939 | 6  | 160769754 | <i>SLC22A3</i>     | -3.516±1.13  | -2.345±0.978 | 2.30E-07 |
| cg01907837 | 6  | 37321337  | <i>RNF8</i>        | 0.658±0.392  | -0.027±0.76  | 2.32E-07 |
| cg01911082 | 8  | 114449272 | <i>CSMD3</i>       | -4.313±0.432 | -3.531±0.873 | 2.34E-07 |
| cg19103704 | 19 | 40440963  | <i>FCGBP</i>       | -0.405±0.197 | -0.886±0.554 | 2.35E-07 |
| cg17041296 | 1  | 76397847  | <i>ASB17</i>       | 1.315±0.317  | 0.656±0.749  | 2.35E-07 |
| cg24027679 | 1  | 9086621   | <i>SLC2A7</i>      | 3.041±0.346  | 2.461±0.638  | 2.36E-07 |
| cg01194444 | 1  | 203054722 | <i>MYOG</i>        | 5.405±0.35   | 4.708±0.789  | 2.36E-07 |
| cg09242541 | 1  | 10490025  | <i>APITD1-CORT</i> | -0.664±0.236 | -1.238±0.662 | 2.36E-07 |
| cg21238818 | 11 | 65816642  | <i>GAL3ST3</i>     | -2.112±0.622 | -1.059±1.163 | 2.37E-07 |
| cg17397493 | 5  | 35231272  | <i>PRLR</i>        | 0.885±0.238  | 0.23±0.761   | 2.37E-07 |
| cg04060163 | 17 | 75136271  | <i>SEC14L1</i>     | -3.589±0.313 | -3.98±0.388  | 2.37E-07 |
| cg04828792 | 21 | 42733433  | <i>MX2</i>         | 2.627±0.2    | 1.842±0.923  | 2.37E-07 |
| cg15448245 | 22 | 24641654  | <i>GGT5</i>        | -0.43±0.261  | 0.192±0.716  | 2.38E-07 |
| cg08440425 | 11 | 71790735  | <i>LRTOMT</i>      | -2.632±0.349 | -3.228±0.659 | 2.39E-07 |
| cg07349094 | 2  | 100759014 | <i>AFF3</i>        | 1.101±0.42   | 0.239±0.98   | 2.40E-07 |
| cg14659547 | 3  | 108476126 | <i>RETNLB</i>      | 1.804±0.218  | 0.975±0.976  | 2.41E-07 |
| cg14535518 | 19 | 35782015  | <i>MAG</i>         | 0.44±0.147   | 0.111±0.378  | 2.42E-07 |
| cg23973000 | 5  | 112770527 | <i>TSSK1B</i>      | 2.535±0.191  | 2.042±0.572  | 2.44E-07 |
| cg08007665 | 11 | 2593857   | <i>KCNQ1</i>       | 1.886±0.271  | 1.327±0.637  | 2.44E-07 |
| cg05964373 | 15 | 56657478  | <i>TEX9</i>        | -4.395±0.372 | -4.86±0.464  | 2.45E-07 |
| cg27635271 | 15 | 75941576  | <i>SNX33</i>       | -0.572±0.325 | 0.138±0.813  | 2.45E-07 |
| cg09019938 | 10 | 52834498  | <i>PRKG1</i>       | -4.232±0.553 | -3.194±1.167 | 2.45E-07 |
| cg15791248 | 8  | 38326730  | <i>FGFR1</i>       | 0.803±0.211  | 1.223±0.476  | 2.45E-07 |
| cg21611708 | 20 | 2277040   | <i>TGM3</i>        | 0.658±0.413  | 1.273±0.652  | 2.47E-07 |
| cg03589001 | 15 | 79164714  | <i>MORF4L1</i>     | -0.096±0.221 | 0.411±0.583  | 2.48E-07 |
| cg16703647 | 15 | 78632592  | <i>CRABP1</i>      | -4.164±0.374 | -3±1.365     | 2.50E-07 |
| cg01870826 | 7  | 5111875   | <i>RBAKDN</i>      | -1.895±0.541 | -0.754±1.303 | 2.52E-07 |
| cg18668753 | 19 | 57352657  | <i>MIMT1</i>       | -0.055±0.205 | 0.45±0.585   | 2.52E-07 |
| cg18003135 | 13 | 78549657  | <i>EDNRB</i>       | 2.105±0.245  | 1.502±0.698  | 2.52E-07 |
| cg12781568 | 11 | 32452038  | <i>WT1</i>         | -0.223±0.418 | 0.572±0.897  | 2.54E-07 |
| cg02065387 | 5  | 161274307 | <i>GABRA1</i>      | -2.866±0.255 | -2.324±0.621 | 2.56E-07 |
| cg01231779 | 14 | 52535887  | <i>NID2</i>        | -4.048±0.45  | -2.685±1.597 | 2.56E-07 |
| cg10051054 | 1  | 3669172   | <i>CCDC27</i>      | 2.139±0.527  | 1.451±0.703  | 2.57E-07 |
| cg24311282 | 19 | 50464887  | <i>SIGLEC11</i>    | 2.73±0.207   | 2.066±0.779  | 2.58E-07 |
| cg11344614 | 21 | 27010160  | <i>JAM2</i>        | 1.759±0.177  | 1.127±0.744  | 2.58E-07 |
| cg18202456 | 1  | 44584930  | <i>KLF17</i>       | 5.29±0.409   | 4.681±0.654  | 2.58E-07 |
| cg11630392 | 3  | 150920964 | <i>GPR171</i>      | 1.077±0.363  | 0.517±0.607  | 2.59E-07 |
| cg03464655 | 2  | 165811982 | <i>SLC38A11</i>    | -0.751±0.389 | -0.073±0.756 | 2.61E-07 |
| cg17725968 | 4  | 96761026  | <i>PDHA2</i>       | 2.553±0.272  | 1.701±1.001  | 2.62E-07 |

|            |    |           |              |              |              |          |
|------------|----|-----------|--------------|--------------|--------------|----------|
| cg23181170 | 5  | 170210672 | GABRP        | 1.604±0.299  | 1.216±0.396  | 2.62E-07 |
| cg23033024 | 20 | 23472484  | CST8         | 2.467±0.216  | 2.045±0.478  | 2.62E-07 |
| cg00031162 | 17 | 7453377   | TNFSF12      | -0.562±0.296 | -0.05±0.57   | 2.63E-07 |
| cg02064402 | 5  | 1225719   | SLC6A18      | 1.418±0.223  | 0.856±0.652  | 2.64E-07 |
| cg19731122 | 17 | 1396395   | MYO1C        | -0.256±0.151 | 0.093±0.403  | 2.65E-07 |
| cg17460386 | 1  | 207095668 | FAIM3        | -0.239±0.303 | -0.889±0.747 | 2.67E-07 |
| cg12893143 | 5  | 176237996 | UNC5A        | -3.975±0.722 | -2.618±1.533 | 2.67E-07 |
| cg23722792 | 17 | 62050468  | SCN4A        | 4.135±0.207  | 3.517±0.725  | 2.68E-07 |
| cg07405796 | 6  | 30104552  | TRIM40       | 0.828±0.406  | 0.021±0.919  | 2.69E-07 |
| cg07236769 | 9  | 21142491  | IFNW1        | 1.221±0.305  | 0.684±0.601  | 2.70E-07 |
| cg15185794 | 1  | 17446087  | PADI2        | -3.337±0.207 | -3.855±0.602 | 2.71E-07 |
| cg15590780 | 1  | 216596639 | USH2A        | -0.488±0.29  | -1.15±0.765  | 2.71E-07 |
| cg24776407 | 11 | 69061634  | MYEOV        | 2.136±0.206  | 1.262±1.035  | 2.71E-07 |
| cg21946698 | 16 | 326615    | RGS11        | 1.006±0.437  | 1.858±0.968  | 2.71E-07 |
| cg09869858 | 12 | 48120416  | ENDOU        | 3.252±0.243  | 2.921±0.347  | 2.72E-07 |
| cg01377755 | 1  | 147143258 | ACP6         | 0.714±0.232  | 0.079±0.743  | 2.73E-07 |
| cg14462830 | 6  | 123959184 | TRDN         | 1.135±0.255  | 0.528±0.703  | 2.73E-07 |
| cg00427635 | 15 | 74166372  | TBC1D21      | -1.481±0.25  | -2.069±0.681 | 2.75E-07 |
| cg13059335 | 8  | 24242109  | ADAMDEC1     | 1.915±0.39   | 1.363±0.585  | 2.76E-07 |
| cg08331840 | 8  | 36746760  | KCNU1        | 1.952±0.268  | 1.253±0.817  | 2.77E-07 |
| cg16853982 | 1  | 236849389 | ACTN2        | -1.01±0.364  | -0.102±1.056 | 2.78E-07 |
| cg00441136 | 20 | 30864848  | KIF3B        | 4.137±0.283  | 3.288±0.997  | 2.79E-07 |
| cg11877382 | 12 | 129338939 | GLT1D1       | -2.689±0.298 | -1.991±0.81  | 2.81E-07 |
| cg13806135 | 13 | 58205045  | PCDH17       | -4.522±0.52  | -3.334±1.375 | 2.83E-07 |
| cg21644826 | 16 | 20775352  | ACSM3        | -3.338±0.331 | -3.726±0.375 | 2.83E-07 |
| cg26215428 | 4  | 88928251  | PKD2         | 1.189±0.23   | 1.634±0.506  | 2.84E-07 |
| cg23922454 | 12 | 113910545 | LHX5         | -3.844±0.432 | -2.809±1.203 | 2.84E-07 |
| cg06745740 | 7  | 81399587  | HGF          | -2.755±0.335 | -1.875±1.029 | 2.86E-07 |
| cg16016036 | 2  | 1417109   | TPO          | 3.089±0.182  | 2.543±0.643  | 2.86E-07 |
| cg13619990 | 16 | 20703237  | ACSM1        | -0.445±0.297 | -1.232±0.921 | 2.87E-07 |
| cg14804557 | 14 | 106139591 | ELK2AP       | 2.646±0.186  | 2.238±0.471  | 2.90E-07 |
| cg12024906 | 19 | 37825679  | HKR1         | -1.636±0.749 | -0.387±1.387 | 2.91E-07 |
| cg19514928 | 1  | 95583636  | TMEM56-RWDD3 | -4.128±0.296 | -4.645±0.58  | 2.91E-07 |
| cg15836660 | 13 | 78493128  | EDNRB        | -4.443±0.419 | -3.323±1.312 | 2.91E-07 |
| cg27426707 | 17 | 48639585  | CACNA1G-AS1  | -3.847±0.213 | -2.817±1.227 | 2.92E-07 |
| cg25310567 | 7  | 151653890 | GALNTL5      | -0.093±0.253 | -0.728±0.741 | 2.92E-07 |
| cg18183281 | 7  | 130132505 | MEST         | 1.018±0.171  | 1.483±0.545  | 2.92E-07 |
| cg00062776 | 19 | 49402424  | TULP2        | 5.105±0.359  | 3.534±1.869  | 2.93E-07 |
| cg17965019 | 6  | 27858545  | HIST1H3J     | -3.595±0.271 | -1.8±2.147   | 2.93E-07 |
| cg24506604 | 12 | 52579502  | KRT80        | 1.271±0.277  | 0.795±0.533  | 2.94E-07 |
| cg12686016 | 7  | 27135477  | HOXA1        | -4.348±0.405 | -2.861±1.764 | 2.96E-07 |
| cg01993576 | 6  | 44187674  | SLC29A1      | -0.713±0.309 | -1.438±0.843 | 2.96E-07 |
| cg21663122 | 6  | 26250936  | HIST1H3F     | -4.018±0.445 | -2.617±1.654 | 2.96E-07 |
| cg14930674 | 15 | 48500240  | SLC12A1      | 2.37±0.286   | 1.75±0.715   | 2.96E-07 |
| cg24926780 | 19 | 15838895  | OR10H2       | 0.236±0.139  | -0.102±0.394 | 2.97E-07 |
| cg11021744 | 3  | 11034279  | SLC6A1       | -3.79±0.64   | -2.791±1.094 | 2.97E-07 |
| cg17788832 | 8  | 87081654  | PSKH2        | -1.059±0.227 | -0.526±0.621 | 2.97E-07 |
| cg13749822 | 4  | 145566663 | HHIP         | -2.253±0.579 | -1.357±0.98  | 2.98E-07 |
| cg00971396 | 3  | 184081400 | POLR2H       | -4.781±0.385 | -5.273±0.503 | 2.98E-07 |
| cg20714328 | 5  | 79331850  | THBS4        | 1.391±0.269  | 1.924±0.609  | 2.99E-07 |
| cg25781202 | 8  | 33424350  | RNF122       | -5.365±0.413 | -4.821±0.562 | 3.00E-07 |
| cg14717170 | 3  | 164914471 | SLITRK3      | -3.029±0.405 | -2.073±1.113 | 3.03E-07 |
| cg20415809 | 2  | 182321855 | ITGA4        | -4.453±0.585 | -2.897±1.825 | 3.03E-07 |
| cg26363196 | 1  | 76540236  | ST6GALNAC3   | -2.782±0.386 | -1.935±0.98  | 3.05E-07 |
| cg01199721 | 12 | 120632764 | GCN1L1       | -4.622±0.343 | -4.984±0.318 | 3.07E-07 |
| cg27299588 | 19 | 5286082   | PTPRS        | 0.766±0.274  | 0.238±0.603  | 3.07E-07 |
| cg19475870 | 5  | 27038605  | CDH9         | -0.651±0.343 | 0.063±0.822  | 3.08E-07 |
| cg17361154 | 9  | 140336563 | ENTPD8       | -1.76±0.278  | -2.281±0.592 | 3.09E-07 |
| cg26377677 | 15 | 91412118  | FURIN        | 1.777±0.357  | 1.065±0.816  | 3.09E-07 |
| cg11778001 | 2  | 191512851 | NAB1         | -1.489±0.351 | -2.124±0.718 | 3.10E-07 |
| cg13975625 | 4  | 164264796 | NPY5R        | -3.423±0.337 | -2.538±1.039 | 3.10E-07 |
| cg00705255 | 19 | 54804613  | LILRA3       | -1.08±0.337  | -1.673±0.667 | 3.11E-07 |
| cg12970081 | 19 | 51273924  | GPR32        | 1.269±0.295  | 0.559±0.829  | 3.11E-07 |
| cg21518208 | 12 | 52761416  | KRT85        | 0.708±0.183  | 0.25±0.536   | 3.12E-07 |
| cg12261786 | 10 | 88727830  | ADIRF        | -0.768±0.297 | -0.171±0.686 | 3.12E-07 |
| cg25905812 | 9  | 841632    | DMRT1        | -4.053±0.607 | -2.799±1.445 | 3.14E-07 |
| cg22298208 | 7  | 142635611 | C7orf34      | 3.236±0.189  | 2.808±0.498  | 3.14E-07 |

|            |    |           |           |              |              |          |
|------------|----|-----------|-----------|--------------|--------------|----------|
| cg06084117 | 7  | 132334901 | FLJ40288  | 1.506±0.353  | 2.219±0.818  | 3.14E-07 |
| cg21578906 | 22 | 32651345  | SLC5A4    | 2.603±0.277  | 1.801±0.946  | 3.15E-07 |
| cg11801011 | 19 | 51220537  | SHANK1    | 0.649±0.195  | 0.149±0.586  | 3.16E-07 |
| cg27351358 | 11 | 27743258  | BDNF      | -2.786±0.324 | -1.875±1.074 | 3.16E-07 |
| cg13818573 | 17 | 43045372  | C1QL1     | -3.304±0.459 | -2.082±1.437 | 3.17E-07 |
| cg14145194 | 19 | 10450022  | ICAM3     | 1.019±0.377  | 0.331±0.78   | 3.19E-07 |
| cg06529761 | 16 | 3702486   | DNASE1    | 1.814±0.24   | 2.174±0.392  | 3.19E-07 |
| cg19353006 | 8  | 15397237  | TUSC3     | 1.82±0.288   | 1.11±0.831   | 3.21E-07 |
| cg02007844 | 12 | 21927990  | KCNJ8     | -4.497±0.35  | -3.346±1.367 | 3.21E-07 |
| cg06468695 | 17 | 8647944   | CCDC42    | 2.075±0.245  | 1.536±0.626  | 3.21E-07 |
| cg04001668 | 16 | 57654347  | GPR56     | 1.867±0.363  | 1.115±0.868  | 3.22E-07 |
| cg11688469 | 1  | 201391061 | TNNI1     | 1.91±0.248   | 1.48±0.484   | 3.24E-07 |
| cg11566244 | 11 | 67351786  | GSTP1     | -2.027±0.255 | -1.445±0.678 | 3.24E-07 |
| cg09813840 | 12 | 109027422 | SELPLG    | -0.767±0.387 | -1.487±0.819 | 3.25E-07 |
| cg22646710 | 1  | 114696798 | SYT6      | -4.288±0.365 | -3.368±1.08  | 3.26E-07 |
| cg19928450 | 12 | 54348629  | HOXC12    | -2.203±0.312 | -1.538±0.771 | 3.27E-07 |
| cg17671157 | 14 | 88793036  | KCNK10    | -3.924±0.428 | -2.803±1.319 | 3.28E-07 |
| cg12432709 | 18 | 52627333  | CCDC68    | 0.056±0.6    | 0.76±0.686   | 3.28E-07 |
| cg06183267 | 2  | 100759134 | AFF3      | 0.474±0.455  | -0.423±1.029 | 3.28E-07 |
| cg25302419 | 5  | 11904015  | CTNND2    | -3.692±0.683 | -2.305±1.599 | 3.32E-07 |
| cg02602411 | 9  | 104357177 | PPP3R2    | 1.776±0.179  | 1.294±0.569  | 3.35E-07 |
| cg12639234 | 8  | 18248964  | NAT2      | 0.466±0.312  | -0.02±0.536  | 3.35E-07 |
| cg24868271 | 3  | 38070460  | PLCD1     | 0.536±0.164  | 0.95±0.486   | 3.35E-07 |
| cg25661884 | 19 | 10124267  | RDH8      | -0.034±0.237 | -0.526±0.57  | 3.42E-07 |
| cg20610181 | 9  | 35674000  | CA9       | 1.32±0.279   | 0.797±0.598  | 3.43E-07 |
| cg23559331 | 17 | 40332958  | KCNH4     | -3.351±0.375 | -1.914±1.718 | 3.44E-07 |
| cg10634424 | 12 | 91506893  | LUM       | 0.675±0.264  | 0.089±0.683  | 3.44E-07 |
| cg12629515 | 6  | 27859811  | HIST1H3J  | -0.527±0.27  | -1.144±0.721 | 3.45E-07 |
| cg03732545 | 1  | 205012130 | CNTN2     | -2.003±0.284 | -1.308±0.816 | 3.46E-07 |
| cg22925639 | 2  | 175628739 | CHRNA1    | 2.658±0.243  | 2.02±0.753   | 3.49E-07 |
| cg09298289 | 5  | 68485754  | CENPH     | -4.87±0.368  | -5.293±0.408 | 3.49E-07 |
| cg04745805 | 17 | 40427474  | STAT5B    | -3.85±0.343  | -3.015±0.982 | 3.50E-07 |
| cg10011232 | 19 | 18654949  | FKBP8     | -2.976±0.397 | -3.581±0.664 | 3.52E-07 |
| cg12647587 | 10 | 96954252  | C10orf129 | 2.883±0.232  | 2.395±0.567  | 3.52E-07 |
| cg20025970 | 12 | 22089560  | ABCC9     | 0.995±0.334  | 0.327±0.77   | 3.52E-07 |
| cg23293787 | 20 | 49576382  | MOCS3     | 2.434±0.345  | 3.044±0.692  | 3.53E-07 |
| cg19320612 | 2  | 167168190 | SCN9A     | 2.584±0.259  | 2.044±0.627  | 3.53E-07 |
| cg05358404 | 20 | 62288950  | RTEL1     | 0.107±0.381  | 0.756±0.731  | 3.56E-07 |
| cg17542385 | 1  | 152681979 | 0         | 0.713±0.329  | 0.037±0.783  | 3.57E-07 |
| cg19937039 | 14 | 94759767  | SERPINA10 | 0.145±0.253  | -0.445±0.692 | 3.58E-07 |
| cg05674036 | 17 | 3323791   | OR3A3     | 1.837±0.321  | 1.112±0.848  | 3.60E-07 |
| cg22496254 | 4  | 17811165  | DCAF16    | -1.776±0.217 | -2.088±0.338 | 3.62E-07 |
| cg26738010 | 18 | 580188    | CETN1     | 2.571±0.292  | 2.035±0.612  | 3.62E-07 |
| cg18669588 | 3  | 52274051  | TWF2      | 1.125±0.23   | 0.623±0.585  | 3.62E-07 |
| cg04345908 | 6  | 32731327  | HLA-DQB2  | 2.242±0.314  | 1.72±0.586   | 3.63E-07 |
| cg11161417 | 17 | 31319454  | SPACA3    | 0.165±0.342  | -0.528±0.802 | 3.63E-07 |
| cg09299388 | 6  | 49755190  | PGK2      | 1.617±0.274  | 0.893±0.857  | 3.63E-07 |
| cg09697795 | 19 | 50666379  | IZUMO2    | -2.345±0.385 | -1.49±0.998  | 3.64E-07 |
| cg12485992 | 17 | 3374971   | SPATA22   | 3.5±0.219    | 3.028±0.551  | 3.66E-07 |
| cg21530890 | 16 | 1032260   | SOX8      | -3.664±0.646 | -2.334±1.544 | 3.67E-07 |
| cg11263296 | 12 | 120428313 | CCDC64    | -1.894±0.371 | -2.681±0.917 | 3.69E-07 |
| cg10365880 | 10 | 102089681 | PKD2L1    | 2.296±0.244  | 1.747±0.643  | 3.70E-07 |
| cg27443224 | 9  | 34710135  | CCL21     | -0.68±0.25   | -0.151±0.616 | 3.71E-07 |
| cg03199651 | 4  | 4862770   | MSX1      | -3.81±0.331  | -2.787±1.22  | 3.72E-07 |
| cg22125370 | 12 | 93966485  | SOCS2     | -3.324±0.336 | -2.195±1.351 | 3.75E-07 |
| cg16192575 | 10 | 48828106  | PTPN20A   | -0.407±0.692 | 0.367±0.734  | 3.75E-07 |
| cg21256649 | 17 | 66507610  | PRKAR1A   | -2.282±0.314 | -2.859±0.662 | 3.75E-07 |
| cg02533173 | 19 | 15391124  | BRD4      | -1.192±0.284 | -0.753±0.486 | 3.78E-07 |
| cg11126134 | 13 | 31480304  | MEDAG     | -3.123±0.658 | -1.741±1.609 | 3.79E-07 |
| cg04144788 | 1  | 40236420  | OXCT2     | -2.006±0.516 | -1.111±1.017 | 3.79E-07 |
| cg04806409 | 21 | 43735505  | TFF3      | 1.308±0.271  | 0.586±0.856  | 3.79E-07 |
| cg08158289 | 5  | 141302729 | KIAA0141  | -0.709±0.27  | -1.226±0.596 | 3.81E-07 |
| cg08453021 | 7  | 37488575  | ELMO1     | -4.328±0.256 | -2.75±1.909  | 3.82E-07 |
| cg11822964 | 19 | 47129337  | PTGIR     | 0.484±0.236  | 0.913±0.491  | 3.83E-07 |
| cg10774440 | 1  | 226076153 | LEFTY1    | 1.316±0.25   | 0.639±0.804  | 3.84E-07 |
| cg14944362 | 20 | 1974924   | PDYN      | -1.013±0.203 | -1.469±0.534 | 3.85E-07 |
| cg24217877 | 16 | 49378579  | 0         | 1.049±0.254  | 0.483±0.663  | 3.87E-07 |

|            |    |           |           |              |              |          |
|------------|----|-----------|-----------|--------------|--------------|----------|
| cg24735489 | 6  | 31088352  | CDSN      | 1.075±0.329  | 0.468±0.698  | 3.87E-07 |
| cg04402875 | 10 | 43572795  | RET       | -4.43±0.653  | -3.174±1.449 | 3.89E-07 |
| cg21115977 | 10 | 48416510  | GDF2      | 0.59±0.207   | 0.005±0.697  | 3.90E-07 |
| cg25003924 | 15 | 52861754  | ARPP19    | 2.457±0.321  | 1.888±0.648  | 3.91E-07 |
| cg20630151 | 3  | 138823086 | BPESC1    | 2.082±0.327  | 1.271±0.959  | 3.91E-07 |
| cg06533629 | 7  | 130419370 | KLF14     | -3.504±0.412 | -2.325±1.405 | 3.93E-07 |
| cg14920846 | 1  | 201618209 | NAV1      | 0.234±0.219  | -0.274±0.599 | 3.94E-07 |
| cg13920529 | 9  | 33402426  | AQP7      | 2.424±0.25   | 2.701±0.261  | 3.96E-07 |
| cg05482722 | 13 | 52598175  | UTP14C    | 2.96±0.489   | 3.394±0.263  | 3.97E-07 |
| cg00067471 | 19 | 1241377   | ATP5D     | -2.658±0.258 | -3.006±0.369 | 3.97E-07 |
| cg03562120 | 20 | 43343997  | WISP2     | -0.404±0.324 | -1.134±0.858 | 3.99E-07 |
| cg08947964 | 6  | 90603803  | GJA10     | 1.71±0.209   | 1.035±0.809  | 3.99E-07 |
| cg07766612 | 1  | 26372887  | SLC30A2   | -4.139±0.814 | -2.846±1.445 | 3.99E-07 |
| cg11812202 | 10 | 118305409 | PNLIP     | 1.54±0.25    | 0.873±0.792  | 4.00E-07 |
| cg17532978 | 12 | 55413394  | NEUROD4   | -3.4±0.513   | -2.663±0.801 | 4.02E-07 |
| cg03605761 | 19 | 663973    | RNF126    | 1.09±0.536   | 0.384±0.745  | 4.02E-07 |
| cg20385229 | 14 | 78175470  | SLIRP     | 0.944±0.312  | 0.305±0.744  | 4.02E-07 |
| cg04717045 | 11 | 69468789  | CCND1     | 2.135±0.286  | 1.482±0.768  | 4.03E-07 |
| cg18895813 | 21 | 28339705  | ADAMTS5   | -4.898±0.406 | -4.192±0.803 | 4.03E-07 |
| cg22354595 | 19 | 57351440  | PEG3      | 0.85±0.237   | 1.332±0.561  | 4.03E-07 |
| cg06817264 | 11 | 66335649  | CTSF      | -2.236±0.435 | -1.365±1.013 | 4.03E-07 |
| cg08603768 | 5  | 137420044 | WNT8A     | 0.773±0.237  | 0.293±0.558  | 4.04E-07 |
| cg12827188 | 4  | 155511987 | FGA       | -0.271±0.213 | -0.81±0.639  | 4.04E-07 |
| cg05142576 | 6  | 27114781  | HIST1H2AH | -3.649±0.507 | -4.194±0.502 | 4.05E-07 |
| cg01472101 | 17 | 6983991   | CLEC10A   | -0.923±0.316 | -1.535±0.708 | 4.07E-07 |
| cg10910525 | 19 | 49658232  | HRC       | 0.856±0.304  | 0.388±0.519  | 4.09E-07 |
| cg25488021 | 6  | 131277447 | EPB41L2   | 2.72±0.166   | 2.277±0.527  | 4.10E-07 |
| cg18581445 | 19 | 4280054   | SHD       | -3.503±0.353 | -2.634±1.03  | 4.11E-07 |
| cg04409427 | 21 | 35736023  | KCNE2     | 2.408±0.33   | 1.894±0.574  | 4.13E-07 |
| cg18854666 | 2  | 219247055 | SLC11A1   | 1.777±0.351  | 1.136±0.736  | 4.14E-07 |
| cg18766847 | 2  | 135595627 | ACMSD     | 1.046±0.232  | 0.359±0.823  | 4.14E-07 |
| cg00343092 | 22 | 43547974  | TSP0      | -3.49±0.33   | -4.13±0.742  | 4.15E-07 |
| cg04301614 | 4  | 37585993  | C4orf19   | -0.266±0.31  | -0.997±0.863 | 4.15E-07 |
| cg27269921 | 22 | 28197091  | MN1       | -4.349±1.529 | -2.542±1.801 | 4.17E-07 |
| cg07675169 | 20 | 61886262  | NKAIN4    | -3.06±0.397  | -2.028±1.229 | 4.19E-07 |
| cg15403517 | 2  | 31806275  | SRD5A2    | -1.252±0.607 | -0.241±1.144 | 4.19E-07 |
| cg17560332 | 2  | 198651303 | BOLL      | -2.246±0.498 | -1.246±1.166 | 4.19E-07 |
| cg17683775 | 9  | 132515809 | PTGES     | 0.992±0.206  | 0.589±0.468  | 4.21E-07 |
| cg18884741 | 7  | 66204797  | RABGEF1   | 1.707±0.308  | 0.815±1.068  | 4.22E-07 |
| cg14706739 | 8  | 21916355  | DMTN      | 2.565±0.184  | 2.163±0.473  | 4.24E-07 |
| cg10883352 | 3  | 142895375 | 0         | 2.489±0.318  | 1.575±1.094  | 4.26E-07 |
| cg22282672 | 5  | 121465223 | ZNF474    | -2.587±0.305 | -2.156±0.468 | 4.26E-07 |
| cg27138584 | 2  | 47796781  | KCNK12    | -3.762±0.403 | -2.701±1.265 | 4.29E-07 |
| cg15485859 | 1  | 207206447 | C1orf116  | 0.888±0.246  | 0.114±0.93   | 4.30E-07 |
| cg16297030 | 5  | 35047946  | AGXT2     | 1.333±0.184  | 0.704±0.757  | 4.31E-07 |
| cg16112129 | 5  | 174870968 | DRD1      | -3.79±0.424  | -2.678±1.326 | 4.34E-07 |
| cg26550234 | 10 | 18239793  | SLC39A12  | 2.101±0.29   | 1.419±0.807  | 4.34E-07 |
| cg23458892 | 19 | 51645979  | SIGLEC7   | 2.118±0.162  | 1.59±0.636   | 4.36E-07 |
| cg13921352 | 3  | 68981890  | FAM19A4   | -3.739±0.711 | -2.285±1.699 | 4.38E-07 |
| cg21604803 | 19 | 50194662  | CPT1C     | -4.447±0.445 | -3.31±1.354  | 4.38E-07 |
| cg22459146 | 3  | 172167030 | GHSR      | -1.086±0.322 | -0.499±0.676 | 4.39E-07 |
| cg20887241 | 1  | 23522636  | HTR1D     | 1.226±0.275  | 0.72±0.585   | 4.39E-07 |
| cg05126264 | 9  | 21077879  | IFNB1     | 3.001±0.241  | 2.533±0.544  | 4.41E-07 |
| cg16986846 | 11 | 61976174  | SCGB2A1   | 0.192±0.36   | -0.474±0.77  | 4.42E-07 |
| cg10515956 | 1  | 85514610  | MCOLN3    | -2.91±0.36   | -3.401±0.527 | 4.42E-07 |
| cg14813083 | 11 | 18477280  | LDHAL6A   | 0.715±0.464  | 1.375±0.719  | 4.45E-07 |
| cg01265637 | 20 | 2795930   | C20orf141 | 2.838±0.2    | 2.469±0.426  | 4.46E-07 |
| cg25928444 | 2  | 220437437 | INHA      | 1.261±0.241  | 0.775±0.568  | 4.48E-07 |
| cg07084709 | 15 | 57883511  | MYZAP     | 3.271±0.533  | 2.228±1.214  | 4.51E-07 |
| cg13843613 | 1  | 177140126 | FAM5B     | -3.923±0.475 | -2.703±1.455 | 4.51E-07 |
| cg04283938 | 22 | 42373298  | 42616     | -3.174±0.372 | -2.451±0.842 | 4.53E-07 |
| cg21624282 | 13 | 113030783 | SPACA7    | 2.269±0.277  | 1.596±0.8    | 4.61E-07 |
| cg14030359 | 14 | 21493406  | NDRG2     | -3.969±0.347 | -3.535±0.451 | 4.61E-07 |
| cg06434470 | 7  | 154429544 | DPP6      | 1.995±0.259  | 1.351±0.767  | 4.65E-07 |
| cg03815350 | 12 | 53663042  | ESPL1     | 1.787±0.217  | 2.148±0.411  | 4.66E-07 |
| cg07634191 | 8  | 27850178  | SCARA5    | -1.659±0.38  | -0.866±0.933 | 4.70E-07 |
| cg27286999 | 9  | 137967306 | OLFM1     | -3.594±0.51  | -2.594±1.168 | 4.70E-07 |

|            |    |           |                    |              |              |          |
|------------|----|-----------|--------------------|--------------|--------------|----------|
| cg11380624 | 12 | 56222881  | <i>TMEM198B</i>    | -2.223±0.273 | -2.633±0.456 | 4.72E-07 |
| cg03283694 | 19 | 50464713  | <i>SIGLEC11</i>    | 0.051±0.241  | -0.492±0.642 | 4.76E-07 |
| cg00075967 | 15 | 74495354  | <i>STRA6</i>       | 1.185±0.289  | 0.491±0.826  | 4.76E-07 |
| cg15156836 | 1  | 26126415  | <i>SEPN1</i>       | -3.82±0.411  | -3.201±0.689 | 4.78E-07 |
| cg07830847 | 1  | 111061374 | <i>KCNA10</i>      | 2.824±0.233  | 2.236±0.703  | 4.79E-07 |
| cg15983538 | 1  | 156123411 | <i>SEMA4A</i>      | 0.848±0.284  | 0.01±1.009   | 4.80E-07 |
| cg25631352 | 2  | 70995527  | <i>ADD2</i>        | -2.054±0.341 | -1.32±0.866  | 4.80E-07 |
| cg08812936 | 3  | 178254213 | <i>KCNMB2</i>      | -1.301±0.256 | -0.582±0.864 | 4.83E-07 |
| cg26424956 | 6  | 34101526  | <i>GRM4</i>        | 1.683±0.296  | 1.026±0.778  | 4.84E-07 |
| cg17191715 | 8  | 86290878  | <i>CA1</i>         | 1.926±0.226  | 1.261±0.801  | 4.84E-07 |
| cg09937039 | 14 | 75989203  | <i>BATF</i>        | -1.278±0.339 | -2.095±0.974 | 4.85E-07 |
| cg03775246 | 5  | 111095049 | <i>NREP</i>        | 0.781±0.36   | 1.147±0.32   | 4.85E-07 |
| cg09243900 | 1  | 156030844 | <i>RAB25</i>       | 0.819±0.247  | 0.077±0.895  | 4.86E-07 |
| cg03969797 | 15 | 23810664  | <i>MKRN3</i>       | 0.798±0.403  | 0.166±0.711  | 4.86E-07 |
| cg26293512 | 16 | 58010433  | <i>TEPP</i>        | -1.134±0.259 | -0.539±0.707 | 4.86E-07 |
| cg18230771 | 15 | 89347176  | <i>ACAN</i>        | -4.575±0.518 | -3.642±1.079 | 4.86E-07 |
| cg26776077 | 9  | 65493891  | <i>FAM74A4</i>     | 1.978±0.261  | 1.524±0.522  | 4.89E-07 |
| cg03902905 | 2  | 44502262  | <i>SLC3A1</i>      | 1.362±0.208  | 1.131±0.221  | 4.91E-07 |
| cg15640375 | 19 | 821565    | <i>LPPR3</i>       | -2.575±0.401 | -1.841±0.853 | 4.99E-07 |
| cg00466436 | 20 | 123163    | <i>DEFB126</i>     | 0.409±0.276  | -0.183±0.7   | 4.99E-07 |
| cg15441973 | 2  | 138721317 | <i>HNMT</i>        | 1.834±0.194  | 1.004±1.012  | 4.99E-07 |
| cg11536940 | 8  | 97658076  | <i>CPQ</i>         | -2.445±0.339 | -3.242±0.95  | 4.99E-07 |
| cg04435420 | 5  | 155754009 | <i>SGCD</i>        | -2.371±0.522 | -1.62±0.827  | 5.00E-07 |
| cg14519134 | 3  | 129261830 | <i>H1FOO</i>       | 3.002±0.2    | 2.684±0.359  | 5.00E-07 |
| cg12555334 | 7  | 56120290  | <i>CCT6A</i>       | -0.87±0.246  | -1.434±0.671 | 5.01E-07 |
| cg10707565 | 10 | 17171695  | <i>CUBN</i>        | 2.315±0.243  | 1.602±0.86   | 5.01E-07 |
| cg24302095 | 7  | 50861049  | <i>GRB10</i>       | -4.343±0.92  | -3.241±1.122 | 5.02E-07 |
| cg26136776 | 19 | 12998426  | <i>KLF1</i>        | 1.821±0.306  | 2.44±0.728   | 5.03E-07 |
| cg12819826 | 19 | 10216676  | <i>PPAN-P2RY11</i> | 0.736±0.365  | 0.112±0.715  | 5.03E-07 |
| cg26145228 | 1  | 107682504 | <i>NTNG1</i>       | -1.161±0.192 | -0.711±0.537 | 5.09E-07 |
| cg25519930 | 12 | 2161640   | <i>CACNA1C</i>     | -3.329±0.715 | -2.117±1.387 | 5.10E-07 |
| cg26209676 | 19 | 56154382  | <i>ZNF581</i>      | -2.371±0.541 | -3.051±0.712 | 5.18E-07 |
| cg10588377 | 10 | 124221799 | <i>HTRA1</i>       | -4.543±0.535 | -3.679±0.983 | 5.18E-07 |
| cg02600430 | 13 | 100623942 | <i>ZIC5</i>        | -1.717±0.204 | -1.022±0.844 | 5.19E-07 |
| cg12275348 | 12 | 93966045  | <i>SOCS2</i>       | -5.194±0.295 | -4.084±1.352 | 5.19E-07 |
| cg09656934 | 1  | 179561500 | <i>TDRD5</i>       | -0.715±0.353 | 0.037±0.89   | 5.23E-07 |
| cg25840094 | 1  | 196945530 | <i>CFHR5</i>       | 0.928±0.27   | 0.245±0.82   | 5.26E-07 |
| cg14849423 | 19 | 57351791  | <i>PEG3</i>        | 0.478±0.119  | 0.904±0.519  | 5.27E-07 |
| cg26135325 | 1  | 152595322 | <i>LCE3A</i>       | 0.654±0.322  | 0.093±0.648  | 5.30E-07 |
| cg18453621 | 9  | 129376904 | <i>LMX1B</i>       | -4.466±0.728 | -3.103±1.592 | 5.33E-07 |
| cg04833845 | 19 | 44286076  | <i>KCNN4</i>       | 0.949±0.354  | 0.355±0.681  | 5.34E-07 |
| cg07258507 | 14 | 23842125  | <i>IL25</i>        | 0.05±0.201   | -0.506±0.671 | 5.36E-07 |
| cg05846716 | 20 | 17208109  | <i>PCSK2</i>       | -4.008±0.363 | -3.244±0.905 | 5.38E-07 |
| cg04312209 | 5  | 35857130  | <i>IL7R</i>        | -1.851±0.333 | -2.62±0.918  | 5.38E-07 |
| cg24833277 | 8  | 124194361 | <i>FAM83A</i>      | 1.394±0.253  | 0.676±0.868  | 5.39E-07 |
| cg22269180 | 15 | 25972025  | <i>ATP10A</i>      | 1.654±0.209  | 1.366±0.315  | 5.39E-07 |
| cg10293925 | 7  | 38670985  | <i>AMPH</i>        | -3.582±0.89  | -2.286±1.438 | 5.39E-07 |
| cg10528989 | 14 | 96722306  | <i>BDKRB1</i>      | 0.467±0.379  | -0.164±0.723 | 5.40E-07 |
| cg05657520 | 1  | 203462521 | <i>OPTC</i>        | 2.65±0.205   | 2.085±0.683  | 5.41E-07 |
| cg03168582 | 9  | 841850    | <i>DMRT1</i>       | -4.491±0.694 | -2.878±1.927 | 5.42E-07 |
| cg05637351 | 18 | 63417669  | <i>CDH7</i>        | -3.97±0.39   | -3.177±0.935 | 5.42E-07 |
| cg03158400 | 21 | 42688886  | <i>FAM3B</i>       | -4.227±0.628 | -3.016±1.421 | 5.45E-07 |
| cg23850212 | 19 | 57049857  | <i>ZFP28</i>       | -3.679±0.894 | -2.483±1.291 | 5.46E-07 |
| cg13765961 | 11 | 60223238  | <i>MS4A1</i>       | 1.068±0.294  | 0.403±0.793  | 5.48E-07 |
| cg09111484 | 12 | 80749651  | <i>OTOGL</i>       | 2.229±0.288  | 1.579±0.775  | 5.48E-07 |
| cg07665060 | 19 | 38794598  | <i>C19orf33</i>    | -0.165±0.35  | -0.792±0.728 | 5.49E-07 |
| cg24844534 | 17 | 77020267  | <i>C1QTNF1</i>     | -5.357±0.522 | -4.1±1.508   | 5.52E-07 |
| cg14519000 | 20 | 61041765  | <i>GATA5</i>       | 2.842±0.333  | 2.291±0.632  | 5.54E-07 |
| cg22424108 | 1  | 95285531  | <i>SLC44A3</i>     | -2.544±0.278 | -3.009±0.534 | 5.61E-07 |
| cg15798455 | 3  | 71833907  | <i>PROK2</i>       | -4.028±0.341 | -2.781±1.524 | 5.67E-07 |
| cg21122774 | 9  | 136604996 | <i>SARDH</i>       | 1.849±0.185  | 1.2±0.793    | 5.67E-07 |
| cg05932408 | 20 | 48184639  | <i>PTGIS</i>       | -3.526±0.463 | -2.629±1.055 | 5.67E-07 |
| cg22424444 | 11 | 1331736   | <i>TOLLIP-AS1</i>  | 2.124±0.408  | 1.21±1.093   | 5.69E-07 |
| cg04926244 | 12 | 24737251  | <i>LINC00477</i>   | 2.235±0.348  | 1.718±0.579  | 5.71E-07 |
| cg25620220 | 11 | 62457325  | <i>LRRN4CL</i>     | 1.507±0.359  | 2.062±0.628  | 5.71E-07 |
| cg09781594 | 2  | 8469388   | <i>LINC00299</i>   | 2.037±0.217  | 1.396±0.778  | 5.71E-07 |
| cg18107072 | 16 | 67427811  | <i>TPPP3</i>       | -3.353±0.431 | -2.633±0.829 | 5.72E-07 |

|            |    |           |          |              |              |          |
|------------|----|-----------|----------|--------------|--------------|----------|
| cg01366419 | 7  | 70597091  | WBSCR17  | -2.283±0.562 | -1.311±1.126 | 5.74E-07 |
| cg14313310 | 1  | 184006816 | COLGALT2 | -2.605±0.313 | -3.38±0.933  | 5.75E-07 |
| cg03287877 | 17 | 43139826  | NMT1     | 1.763±0.317  | 1.202±0.651  | 5.76E-07 |
| cg22463915 | 20 | 62131260  | EEF1A2   | -0.475±0.381 | 0.285±0.898  | 5.77E-07 |
| cg01161611 | 2  | 154801634 | GALNT13  | 2.023±0.316  | 1.36±0.788   | 5.79E-07 |
| cg17173423 | 11 | 59823993  | MS4A3    | 0.111±0.271  | -0.741±1.038 | 5.79E-07 |
| cg19814116 | 1  | 6086448   | KCNAB2   | -1.11±0.594  | -2.121±1.168 | 5.83E-07 |
| cg02655204 | 13 | 49040050  | RB1      | 1.044±0.193  | 0.796±0.265  | 5.85E-07 |
| cg26885858 | 1  | 21766368  | NBPF3    | -4.567±0.486 | -3.76±0.929  | 5.87E-07 |
| cg17251713 | 18 | 61443038  | SERPINB7 | -0.855±0.269 | -1.538±0.825 | 5.87E-07 |
| cg19601328 | 17 | 43368729  | MAP3K14  | -0.219±0.293 | 0.474±0.833  | 5.92E-07 |
| cg26294551 | 3  | 194120827 | GP5      | 2.772±0.348  | 2.161±0.71   | 5.93E-07 |
| cg08612871 | 1  | 35220334  | GJB5     | 1.409±0.377  | 0.802±0.694  | 5.93E-07 |
| cg03586879 | 16 | 6068831   | RBFOX1   | -3.641±0.462 | -2.753±1.046 | 5.96E-07 |
| cg01074640 | 9  | 21228142  | IFNA17   | 1.797±0.255  | 1.321±0.559  | 6.02E-07 |
| cg23888423 | 2  | 242254170 | 42615    | -4.859±0.406 | -5.302±0.426 | 6.04E-07 |
| cg02162069 | 19 | 57352134  | ZIM2     | 0.973±0.147  | 1.464±0.602  | 6.05E-07 |
| cg05056120 | 5  | 158527702 | EBF1     | -2.678±0.209 | -1.794±1.087 | 6.05E-07 |
| cg10273210 | 3  | 160167665 | TRIM59   | -4.153±0.352 | -4.594±0.466 | 6.07E-07 |
| cg01337047 | 18 | 28897113  | DSG1     | -1.455±0.345 | -0.873±0.673 | 6.09E-07 |
| cg23887396 | 17 | 26699551  | SARM1    | -3.546±0.424 | -2.046±1.838 | 6.09E-07 |
| cg18801691 | 18 | 49866335  | DCC      | -3.164±0.429 | -2.371±0.93  | 6.11E-07 |
| cg20449833 | 2  | 46770299  | RHOQ     | -5.134±0.491 | -4.4±0.827   | 6.17E-07 |
| cg01274660 | 7  | 100465625 | TRIP6    | -1.123±0.377 | -1.947±0.986 | 6.19E-07 |
| cg04039397 | 3  | 111260783 | CD96     | -1.936±0.344 | -1.167±0.922 | 6.20E-07 |
| cg15784332 | 19 | 18902172  | COMP     | -3.214±0.401 | -2.125±1.323 | 6.22E-07 |
| cg20366831 | 19 | 3760955   | APBA3    | 0.827±0.272  | 0.267±0.666  | 6.23E-07 |
| cg11043092 | 8  | 6287904   | MCPH1    | 3.252±0.223  | 3.53±0.292   | 6.27E-07 |
| cg18172186 | 6  | 130758314 | TMEM200A | 2.584±0.156  | 1.849±0.908  | 6.27E-07 |
| cg06096336 | 2  | 231989800 | HTR2B    | -0.23±0.313  | 0.398±0.747  | 6.33E-07 |
| cg19461621 | 18 | 500979    | COLEC12  | -3.408±0.618 | -2.106±1.555 | 6.33E-07 |
| cg01871995 | 8  | 17754363  | GLI1     | 0.735±0.271  | 0.246±0.573  | 6.34E-07 |
| cg25402049 | 1  | 14029875  | PRDM2    | 2.267±0.306  | 1.825±0.495  | 6.36E-07 |
| cg14333565 | 19 | 5824065   | NRTN     | 1.866±0.254  | 1.374±0.582  | 6.38E-07 |
| cg17761453 | 1  | 153231562 | LOR      | 2.187±0.256  | 1.414±0.946  | 6.41E-07 |
| cg01033938 | 11 | 130298880 | ADAMTS8  | -3.051±0.319 | -2.177±1.064 | 6.48E-07 |
| cg08555612 | 3  | 71834640  | PROK2    | -4.317±0.455 | -2.709±1.977 | 6.52E-07 |
| cg23909633 | 1  | 207070539 | IL24     | 2.082±0.34   | 1.64±0.476   | 6.52E-07 |
| cg07763768 | 9  | 125877923 | MIR600HG | 1.445±0.332  | 1.874±0.462  | 6.54E-07 |
| cg25689649 | 19 | 17336377  | OCEL1    | 0.148±0.191  | -0.314±0.559 | 6.55E-07 |
| cg09220361 | 5  | 161494515 | GABRG2   | -2.486±0.433 | -1.559±1.11  | 6.59E-07 |
| cg04106190 | 7  | 120964168 | WNT16    | 0.293±0.252  | 0.779±0.575  | 6.59E-07 |
| cg22975913 | 11 | 32457727  | WT1-AS   | -3.129±0.398 | -2.128±1.214 | 6.60E-07 |
| cg24826867 | 16 | 85932853  | IRF8     | -4.627±0.447 | -2.925±2.097 | 6.61E-07 |
| cg14356550 | 1  | 18808102  | KLHDC7A  | 0.057±0.283  | -0.558±0.738 | 6.63E-07 |
| cg08251036 | 2  | 135008923 | 0        | 3.134±0.413  | 2.631±0.526  | 6.64E-07 |
| cg18089852 | 5  | 76507050  | PDE8B    | -3.895±0.767 | -2.511±1.625 | 6.64E-07 |
| cg15495837 | 2  | 96256880  | TRIM43   | 2.437±0.197  | 1.868±0.695  | 6.70E-07 |
| cg26309134 | 19 | 56879571  | ZNF542   | -4.534±0.542 | -3.01±1.862  | 6.70E-07 |
| cg05896682 | 18 | 74964030  | GALR1    | -2.034±0.561 | -1.272±0.837 | 6.71E-07 |
| cg03128832 | 22 | 36112902  | APOL5    | 1.247±0.325  | 0.65±0.704   | 6.74E-07 |
| cg01110312 | 12 | 124116920 | GTF2H3   | -0.552±0.321 | 0.02±0.672   | 6.74E-07 |
| cg15758700 | 12 | 25707667  | IFLTD1   | 0.734±0.288  | 0.128±0.726  | 6.75E-07 |
| cg25081201 | 10 | 43867071  | FXYP4    | 1.713±0.323  | 1.135±0.679  | 6.76E-07 |
| cg07684809 | 12 | 75728212  | GLIPR1L1 | -4.093±0.467 | -3.1±1.191   | 6.78E-07 |
| cg27285720 | 1  | 89664782  | GBP4     | -0.765±0.355 | -1.582±0.986 | 6.79E-07 |
| cg22202141 | 1  | 161520591 | FCGR3A   | 1.839±0.262  | 1.114±0.885  | 6.79E-07 |
| cg17439694 | 3  | 148939523 | CP       | 1.43±0.368   | 0.737±0.821  | 6.80E-07 |
| cg23366752 | 15 | 78556502  | DNAJA4   | 3.949±0.651  | 2.733±1.439  | 6.85E-07 |
| cg17100200 | 1  | 42618313  | GUCA2B   | 3.103±0.315  | 2.602±0.577  | 6.90E-07 |
| cg25006823 | 14 | 67982456  | TMEM229B | -0.922±0.222 | -1.448±0.637 | 7.07E-07 |
| cg13118849 | 19 | 19327542  | NCAN     | 2.608±0.209  | 1.851±0.935  | 7.11E-07 |
| cg23887102 | 6  | 132891034 | TAAR6    | 0.769±0.393  | 1.314±0.606  | 7.19E-07 |
| cg18740800 | 11 | 27914934  | 0        | 0.803±0.23   | 0.088±0.879  | 7.19E-07 |
| cg09306675 | 20 | 45523996  | EYA2     | -2.796±0.334 | -1.778±1.252 | 7.22E-07 |
| cg12215675 | 6  | 167738594 | TTLL2    | 3.602±0.245  | 3.297±0.325  | 7.22E-07 |
| cg14338062 | 12 | 57883279  | MARS     | 2.66±0.227   | 2.315±0.393  | 7.24E-07 |

|            |    |           |                       |              |              |          |
|------------|----|-----------|-----------------------|--------------|--------------|----------|
| cg15187606 | 1  | 47656853  | <i>PDZK1IP1</i>       | 2.949±0.246  | 2.623±0.356  | 7.26E-07 |
| cg23760945 | 19 | 11665140  | <i>ELOF1</i>          | 1.671±0.468  | 1.006±0.744  | 7.26E-07 |
| cg02136132 | 14 | 90527891  | <i>KCNK13</i>         | -4.059±0.287 | -2.867±1.478 | 7.26E-07 |
| cg08319238 | 19 | 45312525  | <i>BCAM</i>           | -3.04±0.28   | -2.645±0.442 | 7.34E-07 |
| cg24652919 | 16 | 3073191   | <i>THOC6</i>          | 0.282±0.387  | -0.338±0.717 | 7.36E-07 |
| cg27590397 | 14 | 38677218  | <i>SSTR1</i>          | -3.23±0.428  | -2.279±1.149 | 7.36E-07 |
| cg27383956 | 19 | 40732902  | <i>CNTD2</i>          | 1.04±0.229   | 0.388±0.801  | 7.54E-07 |
| cg21237418 | 17 | 27045043  | <i>RAB34</i>          | -0.584±0.291 | -1.417±1.024 | 7.56E-07 |
| cg24724583 | 17 | 37307313  | <i>PLXDC1</i>         | -0.506±0.144 | -0.046±0.568 | 7.56E-07 |
| cg26610808 | 10 | 102046685 | <i>BLOC1S2</i>        | -3.452±0.343 | -3.937±0.543 | 7.56E-07 |
| cg05341878 | 8  | 104831646 | <i>RIMS2</i>          | -0.167±0.203 | -0.791±0.77  | 7.57E-07 |
| cg03905144 | 9  | 13249504  | <i>MPDZ</i>           | 1.541±0.256  | 1.118±0.493  | 7.63E-07 |
| cg27626424 | 1  | 153232348 | <i>LOR</i>            | 3.169±0.264  | 2.335±1.029  | 7.63E-07 |
| cg02210887 | 4  | 156586680 | <i>GUCY1A3</i>        | 2.026±0.265  | 1.434±0.717  | 7.64E-07 |
| cg17833578 | 10 | 86001560  | <i>LRIT1</i>          | -0.202±0.259 | -0.81±0.739  | 7.64E-07 |
| cg06499652 | 11 | 13299410  | <i>ARNTL</i>          | -3.49±0.337  | -3.003±0.55  | 7.64E-07 |
| cg21742836 | 16 | 30086175  | <i>PPP4C</i>          | 0.311±0.262  | -0.188±0.594 | 7.64E-07 |
| cg07974303 | 8  | 6783987   | <i>DEFA6</i>          | 1.63±0.198   | 1.216±0.499  | 7.64E-07 |
| cg11675413 | 13 | 98829482  | <i>RNF113B</i>        | 4.413±0.358  | 3.905±0.57   | 7.64E-07 |
| cg09985279 | 16 | 56702134  | <i>MT1G</i>           | -2.735±0.431 | -1.698±1.263 | 7.67E-07 |
| cg23239444 | 6  | 34433320  | <i>PACSIN1</i>        | -1.623±0.298 | -0.87±0.921  | 7.68E-07 |
| cg13181284 | 12 | 52845687  | <i>KRT6B</i>          | 2.927±0.415  | 2.231±0.814  | 7.70E-07 |
| cg00746981 | 1  | 156721141 | <i>HDGF</i>           | -3.295±0.377 | -2.658±0.747 | 7.72E-07 |
| cg03600318 | 10 | 81708991  | <i>SFTPD</i>          | -0.517±0.256 | -1.123±0.738 | 7.72E-07 |
| cg06790862 | 11 | 30601783  | <i>MPPED2</i>         | 2.671±0.257  | 2.145±0.633  | 7.73E-07 |
| cg06677140 | 4  | 4862015   | <i>MSX1</i>           | -4.252±0.575 | -3.118±1.357 | 7.73E-07 |
| cg03381111 | 15 | 25296571  | <i>SNORD116-1</i>     | 0.7±0.163    | 0.297±0.493  | 7.75E-07 |
| cg17178336 | 2  | 219925246 | <i>IHH</i>            | -3.749±0.524 | -2.756±1.183 | 7.76E-07 |
| cg05181279 | 11 | 11982794  | <i>0</i>              | 1.972±0.292  | 1.396±0.69   | 7.78E-07 |
| cg08397758 | 10 | 100174853 | <i>PYROXD2</i>        | -3.513±0.607 | -2.757±0.808 | 7.78E-07 |
| cg12598198 | 11 | 111784386 | <i>HSPB2-C11orf52</i> | 1.681±0.25   | 2.036±0.4    | 7.80E-07 |
| cg10007262 | 7  | 103631219 | <i>RELN</i>           | -3.045±0.556 | -2.133±1.063 | 7.80E-07 |
| cg07042144 | 19 | 54327404  | <i>NLRP12</i>         | 0.432±0.314  | -0.282±0.867 | 7.81E-07 |
| cg07601320 | 12 | 47219841  | <i>SLC38A4</i>        | -2.096±0.612 | -1.065±1.207 | 7.83E-07 |
| cg26986815 | 2  | 202149369 | <i>CASP8</i>          | 2.303±0.312  | 1.932±0.387  | 7.85E-07 |
| cg25058957 | 19 | 3771683   | <i>RAX2</i>           | 3.648±0.36   | 2.809±1.022  | 7.86E-07 |
| cg03054529 | 7  | 30029938  | <i>SCRN1</i>          | 1.129±0.218  | 0.385±0.922  | 7.87E-07 |
| cg12593411 | 19 | 10213722  | <i>ANGPTL6</i>        | 1.397±0.368  | 0.766±0.741  | 7.96E-07 |
| cg01708964 | 7  | 44181791  | <i>MYL7</i>           | 3.792±0.356  | 3.103±0.825  | 7.97E-07 |
| cg25671438 | 17 | 7240223   | <i>ACAP1</i>          | -0.026±0.368 | -0.699±0.8   | 7.98E-07 |
| cg24956866 | 7  | 134464129 | <i>CALD1</i>          | -2.207±0.473 | -1.449±0.88  | 7.98E-07 |
| cg22243733 | 11 | 7506434   | <i>OLFML1</i>         | 0.788±0.229  | 1.193±0.479  | 8.01E-07 |
| cg11213150 | 9  | 129884457 | <i>ANGPTL2</i>        | -0.589±0.448 | 0.217±0.956  | 8.04E-07 |
| cg17880199 | 16 | 15950840  | <i>MYH11</i>          | -4.828±0.45  | -3.733±1.337 | 8.08E-07 |
| cg06424894 | 15 | 45314789  | <i>SORD</i>           | -0.812±0.439 | -1.433±0.699 | 8.09E-07 |
| cg23196831 | 8  | 121137537 | <i>COL14A1</i>        | -2.999±0.601 | -1.902±1.304 | 8.11E-07 |
| cg24562819 | 20 | 23029806  | <i>THBD</i>           | -3.403±0.78  | -2.159±1.445 | 8.16E-07 |
| cg00668685 | 12 | 56624552  | <i>SLC39A5</i>        | 2.691±0.315  | 2.094±0.713  | 8.16E-07 |
| cg18463686 | 7  | 141646690 | <i>CLEC5A</i>         | 0.855±0.28   | 0.123±0.899  | 8.16E-07 |
| cg21066636 | 17 | 4675292   | <i>TM4SF5</i>         | -0.226±0.204 | -0.695±0.571 | 8.17E-07 |
| cg27404050 | 19 | 36303880  | <i>PRODH2</i>         | -0.334±0.278 | -0.998±0.811 | 8.19E-07 |
| cg20015855 | 15 | 68937562  | <i>CORO2B</i>         | 3.433±0.295  | 2.777±0.798  | 8.20E-07 |
| cg17298704 | 3  | 137717607 | <i>CLDN18</i>         | 3.417±0.355  | 2.314±1.367  | 8.27E-07 |
| cg19850370 | 4  | 72205104  | <i>SLC4A4</i>         | 1.363±0.35   | 0.813±0.637  | 8.28E-07 |
| cg12343638 | 5  | 140588231 | <i>PCDHB12</i>        | -2.67±0.392  | -1.965±0.836 | 8.30E-07 |
| cg21032583 | 3  | 197685803 | <i>IQCG</i>           | 2.621±0.301  | 1.602±1.266  | 8.33E-07 |
| cg19862344 | 6  | 49605181  | <i>RHAG</i>           | 0.209±0.329  | 0.847±0.766  | 8.34E-07 |
| cg12875426 | 18 | 46987532  | <i>DYM</i>            | 0.649±0.364  | -0.011±0.785 | 8.35E-07 |
| cg13149307 | 10 | 20104452  | <i>PLXDC2</i>         | -3.59±0.644  | -2.499±1.284 | 8.36E-07 |
| cg09660171 | 9  | 129375847 | <i>LMX1B</i>          | -3.597±0.35  | -2.934±0.792 | 8.36E-07 |
| cg14776962 | 6  | 26251899  | <i>HIST1H2BH</i>      | -3.227±0.466 | -2.275±1.148 | 8.38E-07 |
| cg12532169 | 15 | 23932370  | <i>NDN</i>            | -0.043±0.184 | 0.253±0.345  | 8.38E-07 |
| cg06806711 | 11 | 60223291  | <i>MS4A1</i>          | 0.748±0.339  | -0.054±0.979 | 8.38E-07 |
| cg20520725 | 6  | 26217564  | <i>HIST1H2AE</i>      | -3.171±0.308 | -2.048±1.399 | 8.42E-07 |
| cg27196467 | 4  | 21305490  | <i>KCNIP4</i>         | -1.575±0.376 | -2.163±0.682 | 8.42E-07 |
| cg26918645 | 19 | 44905882  | <i>ZNF285</i>         | -3.834±0.467 | -2.856±1.184 | 8.46E-07 |
| cg26216632 | 2  | 132479319 | <i>C2orf27A</i>       | 1.647±0.236  | 1.37±0.288   | 8.46E-07 |

|            |    |           |                  |              |              |          |
|------------|----|-----------|------------------|--------------|--------------|----------|
| cg25505610 | 11 | 32605184  | <i>EIF3M</i>     | -4.857±0.303 | -5.226±0.393 | 8.47E-07 |
| cg10730174 | 1  | 170633559 | <i>PRRX1</i>     | -4.729±0.752 | -3.358±1.634 | 8.48E-07 |
| cg08331960 | 16 | 2076597   | <i>SLC9A3R2</i>  | -0.597±0.213 | -0.297±0.337 | 8.48E-07 |
| cg22975568 | 5  | 149793436 | <i>CD74</i>      | 2.246±0.301  | 1.771±0.551  | 8.48E-07 |
| cg21043558 | 7  | 140625365 | <i>BRAF</i>      | -0.615±0.302 | 0.041±0.787  | 8.50E-07 |
| cg22349489 | 6  | 27114943  | <i>HIST1H2AH</i> | -4.223±0.83  | -5.082±0.81  | 8.61E-07 |
| cg18286698 | 9  | 74763873  | <i>GDA</i>       | 2.103±0.242  | 1.769±0.374  | 8.62E-07 |
| cg13334054 | 3  | 113956215 | <i>ZNF80</i>     | 2.264±0.254  | 1.883±0.438  | 8.62E-07 |
| cg05156613 | 9  | 111618129 | <i>ACTL7B</i>    | 4.367±0.311  | 3.944±0.472  | 8.64E-07 |
| cg15747595 | 8  | 98289880  | <i>TSPYL5</i>    | -1.693±0.607 | -0.755±1.085 | 8.77E-07 |
| cg08009622 | 6  | 75916327  | <i>COL12A1</i>   | -4.233±0.465 | -2.992±1.531 | 8.77E-07 |
| cg00436282 | 4  | 70861449  | <i>STATH</i>     | 2.284±0.253  | 1.66±0.767   | 8.77E-07 |
| cg26838900 | 3  | 194090132 | <i>LRRC15</i>    | 1.042±0.199  | 0.511±0.655  | 8.78E-07 |
| cg27486427 | 3  | 25469919  | <i>RARB</i>      | -3.705±0.547 | -2.615±1.315 | 8.80E-07 |
| cg21615663 | 16 | 19727911  | <i>IQCK</i>      | 2.295±0.249  | 1.533±0.946  | 8.83E-07 |
| cg04963951 | 5  | 121187764 | <i>FTMT</i>      | 4.097±0.403  | 3.486±0.705  | 8.83E-07 |
| cg00576250 | 20 | 45087765  | <i>ZNF663</i>    | -3.415±0.34  | -2.664±0.916 | 8.87E-07 |
| cg07078114 | 9  | 139606202 | <i>FAM69B</i>    | -1.44±0.323  | -2.224±0.963 | 8.90E-07 |
| cg27365426 | 2  | 143886372 | <i>ARHGAP15</i>  | -0.238±0.38  | -0.909±0.797 | 8.92E-07 |
| cg15595739 | 17 | 63183451  | <i>RGS9</i>      | 2.383±0.253  | 1.683±0.866  | 8.92E-07 |
| cg12588299 | 6  | 167571803 | <i>GPR31</i>     | 1.205±0.269  | 0.79±0.481   | 8.94E-07 |
| cg07935264 | 2  | 113594375 | <i>IL1B</i>      | -0.966±0.382 | -1.705±0.89  | 8.94E-07 |
| cg15983005 | 17 | 39506938  | <i>KRT33A</i>    | 2.458±0.286  | 1.776±0.837  | 8.94E-07 |
| cg10938286 | 20 | 23806999  | <i>CST2</i>      | 3.403±0.258  | 2.635±0.953  | 8.94E-07 |
| cg11830061 | 9  | 5185415   | <i>INSL6</i>     | 4.209±0.334  | 3.681±0.616  | 8.98E-07 |
| cg21530453 | 16 | 56226346  | <i>GNAO1</i>     | -4.466±0.463 | -3.517±1.15  | 9.02E-07 |
| cg00891278 | 3  | 126113784 | <i>CCDC37</i>    | -2.905±0.586 | -1.9±1.19    | 9.07E-07 |
| cg24024214 | 5  | 180326142 | <i>BTNL8</i>     | 2.233±0.285  | 1.622±0.744  | 9.07E-07 |
| cg03782727 | 19 | 35842586  | <i>FFAR1</i>     | 2.957±0.321  | 2.317±0.774  | 9.09E-07 |
| cg07576541 | 1  | 153630883 | <i>SNAPIN</i>    | 2.029±0.306  | 1.336±0.848  | 9.09E-07 |
| cg01443452 | 19 | 36024439  | <i>GAPDHS</i>    | 1.179±0.544  | 1.932±0.848  | 9.13E-07 |
| cg13817266 | 1  | 161494402 | <i>HSPA6</i>     | -0.526±0.302 | -0.205±0.314 | 9.17E-07 |
| cg11668923 | 10 | 128076936 | <i>ADAM12</i>    | -3.019±0.807 | -1.671±1.589 | 9.20E-07 |
| cg26651233 | 14 | 85996101  | <i>FLRT2</i>     | -2.899±0.245 | -2.119±0.973 | 9.21E-07 |
| cg10742801 | 10 | 135161047 | <i>PRAP1</i>     | -1.062±0.344 | -0.468±0.705 | 9.23E-07 |
| cg17897879 | 1  | 12123437  | <i>TNFRSF8</i>   | -4.121±0.355 | -2.984±1.417 | 9.23E-07 |
| cg07948472 | 5  | 95018471  | <i>SPATA9</i>    | 1.491±0.27   | 1.195±0.295  | 9.29E-07 |
| cg10585462 | 4  | 71091866  | <i>FDCSP</i>     | 1.596±0.263  | 0.976±0.762  | 9.30E-07 |
| cg01309152 | 21 | 41239771  | <i>PCP4</i>      | 2.036±0.334  | 1.234±0.986  | 9.34E-07 |
| cg06540636 | 19 | 44174071  | <i>PLAUR</i>     | -3.612±0.447 | -4.154±0.579 | 9.40E-07 |
| cg02633817 | 19 | 35606732  | <i>FXYP3</i>     | 1.208±0.274  | 0.404±1      | 9.47E-07 |
| cg05442902 | 22 | 21369010  | <i>P2RX6</i>     | -2.559±0.247 | -1.994±0.693 | 9.47E-07 |
| cg01200060 | 20 | 657283    | <i>SCRT2</i>     | -4.608±0.346 | -3.391±1.523 | 9.48E-07 |
| cg22396129 | 12 | 42721145  | <i>PPHLN1</i>    | 0.485±0.359  | -0.199±0.825 | 9.52E-07 |
| cg19298821 | 5  | 125967357 | <i>C5orf48</i>   | 2.586±0.26   | 2.107±0.575  | 9.57E-07 |
| cg24607535 | 20 | 58533495  | <i>CDH26</i>     | 2.044±0.347  | 1.415±0.753  | 9.58E-07 |
| cg25947945 | 1  | 201368946 | <i>LAD1</i>      | -1.132±0.231 | -1.663±0.652 | 9.72E-07 |
| cg02786378 | 8  | 17396844  | <i>SLC7A2</i>    | 0.839±0.263  | 0.425±0.479  | 9.74E-07 |
| cg23843812 | 8  | 38385977  | <i>C8orf86</i>   | -3.53±0.397  | -3.049±0.515 | 9.79E-07 |
| cg15957394 | 4  | 7941823   | <i>AFAP1</i>     | -3.302±0.5   | -2.658±0.71  | 9.80E-07 |
| cg25770411 | 7  | 73946901  | <i>GTF2IRD1</i>  | 0.894±0.219  | 1.26±0.433   | 9.80E-07 |
| cg20092728 | 11 | 26744467  | <i>SLC5A12</i>   | 1.724±0.283  | 1.023±0.865  | 9.82E-07 |
| cg09691574 | 11 | 18193674  | <i>MRGPRX4</i>   | 2.276±0.185  | 1.735±0.675  | 9.89E-07 |
| cg12388309 | 20 | 9819805   | <i>PAK7</i>      | -3.94±0.718  | -2.614±1.595 | 9.91E-07 |
| cg15742700 | 8  | 11350853  | <i>BLK</i>       | 1.539±0.366  | 0.832±0.856  | 1.00E-06 |
| cg15272684 | 1  | 36024473  | <i>NCDN</i>      | 0.733±0.157  | 1.071±0.414  | 1.00E-06 |
| cg00563926 | 1  | 92352481  | <i>TGFBP3</i>    | -0.583±0.285 | -1.207±0.765 | 1.00E-06 |
| cg27378216 | 18 | 42281171  | <i>SETBP1</i>    | 2.346±0.236  | 1.595±0.94   | 1.00E-06 |
| cg20740029 | 12 | 101603835 | <i>SLC5A8</i>    | -3.629±0.592 | -2.542±1.308 | 1.01E-06 |
| cg22828602 | 7  | 122338579 | <i>RNF133</i>    | 1.095±0.32   | 0.519±0.691  | 1.01E-06 |
| cg20279283 | 8  | 11566863  | <i>GATA4</i>     | -0.211±0.379 | 0.316±0.599  | 1.01E-06 |
| cg00616135 | 15 | 63413614  | <i>LACTB</i>     | -0.448±0.373 | 0.239±0.828  | 1.02E-06 |
| cg06362985 | 12 | 70132208  | <i>RAB3IP</i>    | -1.268±0.174 | -1.593±0.391 | 1.02E-06 |
| cg06330621 | 16 | 87525461  | <i>ZCCHC14</i>   | -0.261±0.35  | 0.257±0.599  | 1.02E-06 |
| cg27446185 | 1  | 117753965 | <i>VTCN1</i>     | 0.746±0.303  | 0.209±0.643  | 1.03E-06 |
| cg22572779 | 6  | 10434761  | <i>LINC00518</i> | 1.595±0.289  | 0.891±0.871  | 1.03E-06 |
| cg26404725 | 10 | 94819802  | <i>CYP26C1</i>   | 1.571±0.258  | 1.928±0.405  | 1.03E-06 |

|            |    |           |                  |              |              |          |
|------------|----|-----------|------------------|--------------|--------------|----------|
| cg17204100 | 2  | 131357715 | <i>CFC1B</i>     | 3.632±0.437  | 2.828±0.968  | 1.03E-06 |
| cg17745122 | 16 | 54320230  | <i>IRX3</i>      | -4.559±1.303 | -3.162±1.383 | 1.03E-06 |
| cg13492340 | 10 | 15762222  | <i>ITGA8</i>     | -3.601±0.295 | -2.747±1.066 | 1.03E-06 |
| cg21608192 | 16 | 17563827  | <i>XYLT1</i>     | -4.038±0.387 | -3.011±1.277 | 1.04E-06 |
| cg22026853 | 6  | 99282887  | <i>POU3F2</i>    | -4.396±1.005 | -3.17±1.322  | 1.04E-06 |
| cg04834572 | 10 | 76868766  | <i>DUSP13</i>    | 3.472±0.281  | 2.707±0.953  | 1.05E-06 |
| cg21685427 | 20 | 42187356  | <i>SGK2</i>      | 1.523±0.283  | 0.713±1.011  | 1.05E-06 |
| cg09531892 | 8  | 105601835 | <i>LRP12</i>     | -3.158±0.481 | -2.341±0.973 | 1.05E-06 |
| cg26035366 | 3  | 26664621  | <i>LRRC3B</i>    | -4.259±0.607 | -3.324±1.093 | 1.05E-06 |
| cg15321211 | 10 | 43905515  | <i>HNRNPF</i>    | -1.603±0.452 | -2.094±0.492 | 1.05E-06 |
| cg03724463 | 3  | 42306524  | <i>CCK</i>       | -2.169±0.349 | -1.43±0.905  | 1.05E-06 |
| cg27403635 | 5  | 113698291 | <i>KCNN2</i>     | -3.425±0.586 | -2.352±1.293 | 1.05E-06 |
| cg07958192 | 4  | 90033974  | <i>TIGD2</i>     | -0.313±0.361 | 0.222±0.619  | 1.05E-06 |
| cg14839898 | 11 | 111956362 | <i>TIMM8B</i>    | 2.02±0.297   | 1.502±0.619  | 1.06E-06 |
| cg00685836 | 12 | 82153256  | <i>PPFIA2</i>    | -4.362±0.642 | -3.412±1.1   | 1.07E-06 |
| cg04063348 | 6  | 52109347  | <i>IL17F</i>     | 1.799±0.227  | 1.204±0.741  | 1.08E-06 |
| cg00862290 | 3  | 178984973 | <i>KCNMB3</i>    | 0.647±0.299  | 1.179±0.64   | 1.08E-06 |
| cg25455753 | 15 | 93014970  | <i>C15orf32</i>  | 2.633±0.265  | 1.937±0.868  | 1.08E-06 |
| cg01906055 | 2  | 97000811  | <i>NCAPH</i>     | -0.081±0.288 | -0.516±0.506 | 1.09E-06 |
| cg07264679 | 12 | 7657396   | <i>CD163</i>     | 1.869±0.257  | 1.317±0.677  | 1.09E-06 |
| cg13470920 | 19 | 6772831   | <i>VAV1</i>      | 0.432±0.22   | -0.165±0.745 | 1.10E-06 |
| cg17142183 | 2  | 102608192 | <i>IL1R2</i>     | 1.157±0.375  | 0.226±1.156  | 1.10E-06 |
| cg26333641 | 12 | 68647015  | <i>IL22</i>      | 2.613±0.257  | 1.814±1.003  | 1.11E-06 |
| cg03852144 | 5  | 95159639  | <i>GLRX</i>      | -1.352±0.339 | -2.466±1.402 | 1.11E-06 |
| cg09425611 | 16 | 55868370  | <i>CES1</i>      | -0.317±0.244 | -0.872±0.686 | 1.11E-06 |
| cg26247501 | 1  | 89642561  | <i>GBP7</i>      | 0.85±0.284   | 1.28±0.503   | 1.12E-06 |
| cg15820955 | 12 | 48192939  | <i>HDAC7</i>     | 1.676±0.24   | 2.126±0.546  | 1.12E-06 |
| cg07745725 | 19 | 43245860  | <i>PSG3</i>      | 1.048±0.29   | 0.475±0.699  | 1.13E-06 |
| cg07436807 | 10 | 90712767  | <i>ACTA2</i>     | 1.363±0.31   | 1.901±0.645  | 1.13E-06 |
| cg09485593 | 16 | 17566099  | <i>XYLT1</i>     | 2.989±0.19   | 2.331±0.83   | 1.13E-06 |
| cg04583874 | 8  | 144242268 | <i>LY6H</i>      | -1.872±0.299 | -1.249±0.765 | 1.13E-06 |
| cg00347904 | 6  | 35182508  | <i>SCUBE3</i>    | -3.065±0.58  | -1.875±1.458 | 1.13E-06 |
| cg01794265 | 5  | 14582549  | <i>FAM105A</i>   | -4.411±0.384 | -5.009±0.704 | 1.13E-06 |
| cg20862496 | 8  | 143823734 | <i>SLURP1</i>    | 3.232±0.251  | 2.755±0.58   | 1.13E-06 |
| cg06572160 | 19 | 50831901  | <i>KCNC3</i>     | -2.98±0.553  | -1.864±1.366 | 1.14E-06 |
| cg26711820 | 12 | 81101689  | <i>MYF6</i>      | 0.259±0.331  | -0.432±0.848 | 1.14E-06 |
| cg01717150 | 8  | 140716495 | <i>KCNK9</i>     | -4.3±0.527   | -3.246±1.288 | 1.14E-06 |
| cg16112050 | 18 | 713200    | <i>ENOSF1</i>    | 2.216±0.592  | 1.288±1.093  | 1.14E-06 |
| cg02449608 | 19 | 58486600  | <i>C19orf18</i>  | 2.486±0.432  | 1.913±0.645  | 1.14E-06 |
| cg15761405 | 1  | 157746405 | <i>FCRL2</i>     | 0.869±0.258  | 0.075±0.998  | 1.15E-06 |
| cg16933388 | 3  | 49592529  | <i>BSN</i>       | -3.817±0.353 | -2.977±1.044 | 1.15E-06 |
| cg07337598 | 1  | 150953943 | <i>ANXA9</i>     | 0.647±0.225  | 0.043±0.755  | 1.15E-06 |
| cg11846956 | 19 | 51520382  | <i>KLK10</i>     | -3.099±0.64  | -2.099±1.178 | 1.16E-06 |
| cg02989257 | 1  | 32169274  | <i>COL16A1</i>   | 0.869±0.258  | 1.331±0.558  | 1.16E-06 |
| cg09421562 | 17 | 56357994  | <i>MPO</i>       | 0.733±0.248  | 0.196±0.663  | 1.16E-06 |
| cg23040064 | 16 | 87635784  | <i>JPH3</i>      | -4.391±0.499 | -3.344±1.289 | 1.16E-06 |
| cg01322134 | 1  | 228194448 | <i>WNT3A</i>     | -4.531±0.715 | -2.993±1.897 | 1.17E-06 |
| cg15534366 | 20 | 59826207  | <i>CDH4</i>      | 0.272±0.341  | 0.922±0.792  | 1.17E-06 |
| cg01204985 | 19 | 54849738  | <i>LILRA4</i>    | 1.491±0.18   | 0.874±0.78   | 1.18E-06 |
| cg25864727 | 21 | 26803075  | <i>LINC00158</i> | 2.015±0.275  | 1.234±0.98   | 1.18E-06 |
| cg23219570 | 12 | 4488893   | <i>FGF23</i>     | -2.21±0.46   | -1.443±0.916 | 1.18E-06 |
| cg05633152 | 14 | 70263811  | <i>SLC10A1</i>   | 3.161±0.205  | 2.697±0.576  | 1.18E-06 |
| cg19252956 | 9  | 273072    | <i>DOCK8</i>     | 0.896±0.422  | 0.18±0.858   | 1.18E-06 |
| cg26962295 | 16 | 28961797  | <i>NFATC2IP</i>  | -1.247±0.409 | -1.828±0.67  | 1.18E-06 |
| cg01671881 | 20 | 31804901  | <i>BPIFA3</i>    | 1.139±0.238  | 0.425±0.899  | 1.18E-06 |
| cg02580606 | 17 | 39526726  | <i>KRT33B</i>    | 2.174±0.181  | 1.681±0.618  | 1.19E-06 |
| cg04398282 | 4  | 68424256  | <i>STAP1</i>     | 1.492±0.312  | 1.047±0.512  | 1.19E-06 |
| cg00400263 | 20 | 58514201  | <i>PPP1R3D</i>   | 4.997±0.5    | 3.64±1.701   | 1.19E-06 |
| cg23610820 | 19 | 43774921  | <i>PSG9</i>      | 1.232±0.148  | 0.994±0.282  | 1.21E-06 |
| cg00757952 | 22 | 27014415  | <i>CRYBB1</i>    | 1.378±0.247  | 0.874±0.62   | 1.21E-06 |
| cg09682183 | 6  | 167705253 | <i>UNC93A</i>    | -0.361±0.313 | -1.063±0.87  | 1.21E-06 |
| cg14348532 | 11 | 14993562  | <i>CALCA</i>     | -2.504±0.406 | -1.881±0.733 | 1.21E-06 |
| cg05190718 | 1  | 116310712 | <i>CASQ2</i>     | 0.99±0.291   | 0.354±0.786  | 1.21E-06 |
| cg00613255 | 11 | 2182376   | <i>INS</i>       | 1.953±0.265  | 1.368±0.725  | 1.21E-06 |
| cg04387658 | 3  | 121775080 | <i>CD86</i>      | 1.243±0.277  | 0.626±0.764  | 1.21E-06 |
| cg20437604 | 1  | 150954554 | <i>ANXA9</i>     | 0.705±0.197  | 0.005±0.887  | 1.22E-06 |
| cg11591325 | 5  | 76012591  | <i>F2R</i>       | -5.082±0.572 | -3.775±1.622 | 1.22E-06 |

|            |    |           |               |              |              |          |
|------------|----|-----------|---------------|--------------|--------------|----------|
| cg22546318 | 12 | 54070378  | ATP5G2        | -2.851±0.336 | -3.645±0.989 | 1.23E-06 |
| cg01555431 | 6  | 151562026 | AKAP12        | -3.461±0.382 | -2.603±1.065 | 1.23E-06 |
| cg22165175 | 1  | 111148915 | KCNA2         | -1.863±0.518 | -1.03±0.991  | 1.23E-06 |
| cg25917510 | 12 | 54402888  | HOXC8         | -4.736±0.399 | -3.204±1.946 | 1.24E-06 |
| cg02966851 | 6  | 5260200   | LYRM4         | -0.219±0.267 | -0.705±0.591 | 1.24E-06 |
| cg06059810 | 4  | 71587722  | RUFY3         | 1.332±0.332  | 1.791±0.526  | 1.24E-06 |
| cg11976616 | 5  | 41213172  | C6            | 1.507±0.306  | 0.81±0.866   | 1.25E-06 |
| cg12213910 | 6  | 150211211 | LOC100652739  | 2.232±0.328  | 1.797±0.491  | 1.25E-06 |
| cg17384214 | 6  | 31801701  | C6orf48       | 2.685±0.239  | 2.361±0.369  | 1.25E-06 |
| cg00619207 | 1  | 111743368 | DENND2D       | 0.285±0.238  | -0.195±0.591 | 1.26E-06 |
| cg06194186 | 2  | 207803693 | CPO           | 1.274±0.288  | 0.74±0.651   | 1.26E-06 |
| cg15234096 | 5  | 96479253  | LIX1          | 1.644±0.351  | 1.2±0.493    | 1.26E-06 |
| cg19030554 | 16 | 1822289   | NME3          | -2.142±0.589 | -2.913±0.868 | 1.27E-06 |
| cg08495878 | 14 | 95027859  | SERPINA4      | 1.387±0.287  | 0.768±0.766  | 1.27E-06 |
| cg12815142 | 17 | 4872603   | SPAG7         | 1.161±0.292  | 0.468±0.864  | 1.27E-06 |
| cg12382902 | 12 | 4383699   | CCND2         | -5.528±0.652 | -3.792±2.182 | 1.27E-06 |
| cg04289385 | 6  | 36355825  | ETV7          | -1.158±0.402 | -1.983±1.017 | 1.28E-06 |
| cg23910243 | 16 | 31484618  | TGFB1I1       | 0.185±0.354  | 0.864±0.832  | 1.28E-06 |
| cg18241647 | 20 | 43753347  | WFDC12        | 2.296±0.318  | 1.791±0.6    | 1.28E-06 |
| cg01450842 | 2  | 48796213  | STON1-GTF2A1L | 2.576±0.361  | 1.995±0.692  | 1.28E-06 |
| cg03292149 | 19 | 45279765  | CBLC          | 1.668±0.345  | 0.798±1.091  | 1.29E-06 |
| cg01988129 | 8  | 67344936  | ADHFE1        | -2.314±0.834 | -1.194±1.274 | 1.29E-06 |
| cg18506679 | 9  | 127563860 | OLFML2A       | 3.315±0.185  | 2.902±0.514  | 1.29E-06 |
| cg09878269 | 13 | 113812524 | PROZ          | 2.644±0.214  | 2.322±0.378  | 1.30E-06 |
| cg23663332 | 8  | 33341954  | MAK16         | 1.123±0.214  | 0.531±0.745  | 1.30E-06 |
| cg26385222 | 7  | 150497077 | TMEM176B      | -1.383±0.463 | -0.64±0.886  | 1.30E-06 |
| cg04126335 | 1  | 145525223 | ITGA10        | 1.388±0.217  | 1.807±0.514  | 1.30E-06 |
| cg08398233 | 1  | 20811641  | CAMK2N1       | -2.148±0.275 | -1.394±0.95  | 1.30E-06 |
| cg02330106 | 10 | 131264840 | MGMT          | 2.031±0.35   | 1.343±0.844  | 1.30E-06 |
| cg14035045 | 3  | 50606289  | HEMK1         | -1.013±0.173 | -1.446±0.543 | 1.31E-06 |
| cg14009688 | 7  | 134464242 | CALD1         | -2.145±0.441 | -1.479±0.784 | 1.31E-06 |
| cg24650229 | 3  | 118864825 | IGSF11        | 3.668±0.267  | 2.786±1.119  | 1.31E-06 |
| cg04446579 | 1  | 173639071 | ANKRD45       | -3.076±0.37  | -2.226±1.061 | 1.32E-06 |
| cg26620356 | 5  | 175789238 | KIAA1191      | -0.75±0.516  | -1.426±0.762 | 1.32E-06 |
| cg10124201 | 2  | 198650752 | BOLL          | -0.281±0.181 | 0.101±0.474  | 1.32E-06 |
| cg05209917 | 3  | 1134730   | CNTN6         | -0.174±0.365 | 0.547±0.888  | 1.33E-06 |
| cg16940935 | 16 | 20702428  | ACSM1         | 2.904±0.23   | 2.427±0.59   | 1.33E-06 |
| cg03382797 | 9  | 135755363 | C9orf9        | 0.825±0.359  | 0.382±0.49   | 1.34E-06 |
| cg12854483 | 19 | 11649671  | CNN1          | -2.476±0.364 | -1.672±1.001 | 1.36E-06 |
| cg10269439 | 2  | 113670582 | IL37          | 1.321±0.266  | 0.692±0.788  | 1.36E-06 |
| cg22228134 | 14 | 25078609  | GZMH          | 1.758±0.25   | 1.039±0.91   | 1.36E-06 |
| cg14732540 | 1  | 92414722  | BRDT          | 0.212±0.29   | -0.522±0.922 | 1.36E-06 |
| cg01226811 | 12 | 21927612  | KCNJ8         | -3.212±0.318 | -2.295±1.161 | 1.36E-06 |
| cg01693350 | 11 | 32452187  | WT1           | -0.178±0.437 | 0.518±0.833  | 1.37E-06 |
| cg10490064 | 22 | 25617422  | CRYBB2        | 1.773±0.22   | 1.301±0.586  | 1.38E-06 |
| cg02361557 | 1  | 107682963 | NTNG1         | -4.875±0.327 | -3.516±1.74  | 1.39E-06 |
| cg08458487 | 10 | 81709191  | SFTPD         | 0.466±0.319  | -0.365±1.048 | 1.39E-06 |
| cg00334507 | 16 | 29824599  | PRRT2         | 1.028±0.267  | 0.573±0.549  | 1.39E-06 |
| cg09440289 | 12 | 15475990  | PTPRO         | -4.101±0.442 | -3.222±1.085 | 1.40E-06 |
| cg18754342 | 12 | 14849268  | GUCY2C        | 1.807±0.279  | 1.218±0.732  | 1.40E-06 |
| cg05072008 | 7  | 50518647  | FIGNL1        | -0.137±0.38  | -0.966±1.033 | 1.40E-06 |
| cg15149645 | 16 | 28550619  | NUPR1         | -0.847±0.48  | 0.196±1.299  | 1.40E-06 |
| cg09462575 | 20 | 43803485  | PI3           | -0.892±0.236 | -1.329±0.536 | 1.41E-06 |
| cg15207619 | 13 | 49975643  | CAB39L        | -1.641±0.324 | -2.222±0.709 | 1.42E-06 |
| cg04818845 | 1  | 6580167   | PLEKHG5       | -0.655±0.259 | -0.147±0.627 | 1.42E-06 |
| cg23577242 | 11 | 30603015  | MPPED2        | 3.154±0.295  | 2.559±0.738  | 1.43E-06 |
| cg15869642 | 16 | 49326109  | 0             | 2.923±0.297  | 2.357±0.696  | 1.43E-06 |
| cg15842483 | 8  | 90914033  | OSGIN2        | -3.976±0.405 | -4.445±0.502 | 1.43E-06 |
| cg00519208 | 1  | 93258319  | EV15          | 0.008±0.295  | 0.564±0.684  | 1.44E-06 |
| cg15261665 | 3  | 46506374  | LTF           | -0.666±0.317 | -1.433±0.965 | 1.44E-06 |
| cg10624445 | 16 | 58006124  | CNGB1         | 1.097±0.293  | 0.623±0.571  | 1.44E-06 |
| cg23557926 | 1  | 196620963 | CFH           | -2.469±0.474 | -3.116±0.744 | 1.44E-06 |
| cg17177660 | 4  | 177714456 | VEGFC         | -0.906±0.212 | -0.352±0.7   | 1.45E-06 |
| cg13553204 | 1  | 26504548  | CNKSRI1       | 0.176±0.273  | -0.48±0.824  | 1.45E-06 |
| cg27440834 | 3  | 125239841 | SNX4          | 1.704±0.321  | 1.086±0.762  | 1.45E-06 |
| cg16911220 | 12 | 52695728  | KRT86         | 1.581±0.273  | 1.862±0.275  | 1.46E-06 |
| cg06378617 | 17 | 39095141  | KRT23         | 0.85±0.278   | 0.23±0.776   | 1.47E-06 |

|            |    |           |            |              |              |          |
|------------|----|-----------|------------|--------------|--------------|----------|
| cg12811135 | 2  | 88824472  | TEX37      | 3.194±0.238  | 2.759±0.534  | 1.47E-06 |
| cg22767466 | 11 | 89541866  | TRIM49     | 2.589±0.245  | 1.882±0.899  | 1.47E-06 |
| cg01457622 | 22 | 22988833  | GGTLC2     | 2.837±0.213  | 2.353±0.606  | 1.47E-06 |
| cg00079056 | 9  | 33239641  | SPINK4     | 1.844±0.24   | 2.253±0.497  | 1.48E-06 |
| cg18180783 | 10 | 75402320  | MYOZ1      | 3.03±0.184   | 2.672±0.443  | 1.49E-06 |
| cg19579782 | 10 | 17243880  | TRDMT1     | -0.644±0.203 | -0.236±0.507 | 1.49E-06 |
| cg05262335 | 6  | 159466062 | TAGAP      | -0.764±0.473 | -1.513±0.899 | 1.49E-06 |
| cg15765694 | 9  | 104358101 | PPP3R2     | 1.062±0.197  | 0.56±0.633   | 1.50E-06 |
| cg09329225 | 14 | 57734381  | AP5M1      | -0.803±0.279 | -0.187±0.769 | 1.50E-06 |
| cg04713521 | 9  | 132428538 | PRRX2      | -3.84±0.747  | -2.863±1.112 | 1.50E-06 |
| cg21992250 | 11 | 60718709  | SLC15A3    | -1.76±0.301  | -0.915±1.075 | 1.51E-06 |
| cg12601757 | 1  | 76540465  | ST6GALNAC3 | -3.989±0.459 | -3.07±1.14   | 1.51E-06 |
| cg10743104 | 1  | 13910206  | PDPN       | -4.156±0.464 | -3.044±1.401 | 1.51E-06 |
| cg12324144 | 3  | 169531663 | LRRC34     | -1.03±0.375  | -1.743±0.879 | 1.52E-06 |
| cg24693368 | 2  | 155554844 | KCNJ3      | -2.787±0.366 | -2.012±0.968 | 1.52E-06 |
| cg23719124 | 1  | 110254919 | GSTM5      | 0.51±0.578   | 1.216±0.78   | 1.52E-06 |
| cg10098888 | 2  | 227665799 | 0          | -3.746±0.613 | -4.462±0.774 | 1.53E-06 |
| cg27270684 | 7  | 55757158  | FKBP9L     | -3.41±0.349  | -2.722±0.854 | 1.53E-06 |
| cg12089439 | 8  | 15398333  | TUSC3      | -2.628±0.33  | -2.16±0.547  | 1.53E-06 |
| cg27157038 | 10 | 98063999  | DNTT       | 3.079±0.287  | 2.739±0.371  | 1.54E-06 |
| cg27221338 | 7  | 6525025   | KDELR2     | 2.445±0.393  | 1.521±1.163  | 1.54E-06 |
| cg20113732 | 11 | 20691180  | NELL1      | -3.836±0.808 | -2.588±1.491 | 1.55E-06 |
| cg24171152 | 12 | 90051243  | ATP2B1     | 3.312±0.313  | 2.94±0.406   | 1.55E-06 |
| cg00958560 | 4  | 5990039   | 0          | 1.215±0.244  | 0.649±0.712  | 1.56E-06 |
| cg05768141 | 1  | 160039847 | KCNJ10     | -3.797±0.312 | -2.76±1.327  | 1.56E-06 |
| cg24477636 | 19 | 15919005  | OR10H1     | 1.612±0.337  | 0.944±0.829  | 1.56E-06 |
| cg13059782 | 9  | 39288689  | CNTNAP3    | -2.397±0.301 | -1.829±0.702 | 1.57E-06 |
| cg00551244 | 8  | 125183776 | FER1L6-AS2 | 2.106±0.323  | 2.514±0.459  | 1.58E-06 |
| cg11560645 | 14 | 106238198 | 0          | 1.094±0.185  | 0.657±0.551  | 1.58E-06 |
| cg01114088 | 4  | 5021111   | CYTL1      | -3.059±0.846 | -1.824±1.458 | 1.58E-06 |
| cg12346881 | 5  | 150283885 | ZNF300     | 2.106±0.27   | 1.563±0.675  | 1.58E-06 |
| cg05105913 | 17 | 48422990  | XYLT2      | -0.582±0.184 | -0.98±0.498  | 1.59E-06 |
| cg01658815 | 10 | 116444040 | ABLIM1     | -0.939±0.386 | -0.326±0.737 | 1.59E-06 |
| cg23665568 | 1  | 85745053  | 0          | 0.925±0.342  | 0.327±0.732  | 1.59E-06 |
| cg20300246 | 9  | 139096747 | LHX3       | -2.296±0.302 | -1.391±1.157 | 1.59E-06 |
| cg04340502 | 6  | 52775209  | GSTA3      | 0.54±0.348   | -0.146±0.852 | 1.60E-06 |
| cg11469778 | 2  | 131674201 | ARHGEF4    | -0.604±0.351 | 0.075±0.842  | 1.60E-06 |
| cg05799317 | 6  | 165723796 | C6orf118   | 2.854±0.238  | 2.47±0.464   | 1.60E-06 |
| cg04994456 | 1  | 20141662  | RNF186     | 1.219±0.276  | 0.501±0.911  | 1.60E-06 |
| cg04991214 | 1  | 161089118 | NIT1       | 2.352±0.325  | 1.724±0.78   | 1.61E-06 |
| cg09457245 | 12 | 54778750  | ZNF385A    | 1.117±0.333  | 0.636±0.567  | 1.62E-06 |
| cg00121640 | 9  | 120176515 | ASTN2      | -3.064±0.271 | -2.213±1.09  | 1.64E-06 |
| cg18596794 | 1  | 167689891 | MPZL1      | 1.637±0.334  | 1.104±0.644  | 1.64E-06 |
| cg12351433 | 2  | 48982957  | LHCGR      | -2.077±0.403 | -1.182±1.127 | 1.64E-06 |
| cg18121684 | 18 | 61254561  | SERPINB13  | 2.694±0.386  | 2.094±0.721  | 1.64E-06 |
| cg14541950 | 1  | 228645704 | HIST3H2BB  | -5.393±0.457 | -3.8±2.049   | 1.65E-06 |
| cg13742532 | 3  | 42850848  | ACKR2      | 0.469±0.304  | -0.002±0.564 | 1.65E-06 |
| cg07747970 | 17 | 35293719  | LHX1       | -3.241±0.245 | -2.472±0.987 | 1.65E-06 |
| cg12339029 | 2  | 211179902 | MYL1       | 2.722±0.291  | 1.94±0.997   | 1.65E-06 |
| cg08946332 | 17 | 6899888   | ALOX12     | 2.073±0.356  | 2.638±0.681  | 1.66E-06 |
| cg12864581 | 1  | 31660916  | NKAIN1     | 2.411±0.221  | 1.981±0.535  | 1.66E-06 |
| cg14696820 | 1  | 152800168 | LCE1A      | 0.359±0.231  | -0.196±0.703 | 1.66E-06 |
| cg15997411 | 1  | 65352384  | JAK1       | 2.984±0.298  | 3.275±0.274  | 1.67E-06 |
| cg16937611 | 14 | 95048102  | SERPINA5   | 1.277±0.182  | 0.793±0.617  | 1.67E-06 |
| cg17961200 | 9  | 135937572 | CEL        | 3.089±0.301  | 2.747±0.367  | 1.68E-06 |
| cg22572159 | 1  | 115880646 | NGF        | -3.995±0.486 | -3.118±1.082 | 1.69E-06 |
| cg22402007 | 9  | 87282823  | NTRK2      | -2.831±0.319 | -2.047±0.995 | 1.69E-06 |
| cg11270633 | 19 | 39736956  | IFNL3      | 0.397±0.241  | -0.118±0.647 | 1.70E-06 |
| cg02431687 | 9  | 130828652 | NAIF1      | 3.333±0.384  | 2.793±0.633  | 1.70E-06 |
| cg00273124 | 5  | 177581512 | NHP2       | 2.487±0.203  | 1.839±0.832  | 1.70E-06 |
| cg25900806 | 2  | 33953779  | MYADML     | 0.374±0.21   | 0.015±0.439  | 1.70E-06 |
| cg09188980 | 11 | 14993378  | CALCA      | -2.532±0.45  | -1.781±0.916 | 1.71E-06 |
| cg03005261 | 4  | 110480828 | CCDC109B   | -1.928±0.437 | -2.707±0.958 | 1.71E-06 |
| cg18552939 | 15 | 23932620  | NDN        | -1.253±0.334 | -0.813±0.505 | 1.73E-06 |
| cg02150910 | 14 | 25079357  | GZMH       | 0.746±0.263  | 0.265±0.595  | 1.73E-06 |
| cg26212229 | 18 | 19191611  | SNRPD1     | 2.662±0.241  | 2.102±0.708  | 1.73E-06 |
| cg27462160 | 16 | 89768630  | SPATA2L    | -3.484±0.301 | -3.793±0.305 | 1.73E-06 |

|            |    |           |          |              |              |          |
|------------|----|-----------|----------|--------------|--------------|----------|
| cg25829729 | 13 | 36788667  | SOHLH2   | 2.12±0.208   | 1.718±0.5    | 1.73E-06 |
| cg15057726 | 3  | 127317466 | MCM2     | -4.792±0.345 | -5.145±0.351 | 1.74E-06 |
| cg04987894 | 1  | 110254616 | GSTM5    | -0.812±0.809 | 0.055±0.896  | 1.74E-06 |
| cg19584957 | 1  | 1114579   | TTLL10   | 4.595±0.433  | 3.898±0.844  | 1.74E-06 |
| cg07197059 | 14 | 23836012  | EFS      | -0.703±0.358 | -0.034±0.83  | 1.74E-06 |
| cg10784090 | 3  | 137717598 | CLDN18   | 2.784±0.326  | 1.904±1.124  | 1.74E-06 |
| cg15003158 | 5  | 68628431  | 0        | -2.575±0.66  | -3.315±0.788 | 1.74E-06 |
| cg22416721 | 4  | 88570574  | DMP1     | 0.923±0.292  | 1.546±0.784  | 1.74E-06 |
| cg14076161 | 12 | 11463379  | PRB4     | 0.37±0.246   | -0.16±0.668  | 1.76E-06 |
| cg16509658 | 5  | 160975347 | GABRB2   | -4.515±0.626 | -3.388±1.392 | 1.77E-06 |
| cg07456645 | 19 | 4769146   | MIR7-3HG | -2.816±0.426 | -2.049±0.947 | 1.78E-06 |
| cg23744433 | 1  | 67390759  | MIER1    | -2.93±0.285  | -2.521±0.484 | 1.78E-06 |
| cg14479329 | 6  | 167370587 | RNASET2  | -3.136±0.371 | -2.753±0.385 | 1.78E-06 |
| cg01086895 | 11 | 6676515   | DCHS1    | -3.286±0.546 | -2.318±1.194 | 1.78E-06 |
| cg03292388 | 4  | 8594514   | CPZ      | -3.98±0.877  | -2.765±1.423 | 1.79E-06 |
| cg01144286 | 20 | 9495596   | LAMP5    | -3.848±0.36  | -2.897±1.215 | 1.80E-06 |
| cg04127255 | 19 | 43588055  | PSG2     | 3.304±0.237  | 2.89±0.51    | 1.83E-06 |
| cg09911755 | 17 | 45899773  | OSBPL7   | -0.389±0.252 | 0.104±0.617  | 1.83E-06 |
| cg20468883 | 15 | 59982396  | BNIP2    | -1.449±0.314 | -1.926±0.574 | 1.83E-06 |
| cg01593190 | 5  | 178772793 | ADAMTS2  | -4.274±0.486 | -3.264±1.271 | 1.83E-06 |
| cg20209009 | 17 | 45811322  | TBX21    | -3.618±0.289 | -2.367±1.625 | 1.83E-06 |
| cg18901940 | 10 | 69869364  | MYPN     | 0.618±0.351  | 1.036±0.463  | 1.84E-06 |
| cg06552037 | 2  | 220435838 | OBSL1    | -5.248±1.118 | -4.009±1.316 | 1.84E-06 |
| cg00214794 | 17 | 39780623  | KRT17    | 0.648±0.242  | 0.249±0.488  | 1.85E-06 |
| cg06907544 | 15 | 23255227  | GOLGA8I  | 1.72±0.234   | 1.33±0.478   | 1.85E-06 |
| cg11177693 | 2  | 27604063  | ZNF513   | -0.864±0.339 | -0.085±0.99  | 1.87E-06 |
| cg00401678 | 19 | 14787227  | EMR3     | -0.453±0.202 | -0.784±0.404 | 1.87E-06 |
| cg24331162 | 11 | 1855665   | SYT8     | 0.686±0.157  | 0.176±0.659  | 1.87E-06 |
| cg26900154 | 2  | 26781731  | OTOF     | -0.175±0.327 | 0.465±0.801  | 1.88E-06 |
| cg27465849 | 10 | 15084843  | OLAH     | 2.406±0.276  | 1.861±0.683  | 1.88E-06 |
| cg26750002 | 19 | 49244674  | RASIP1   | -0.856±0.414 | -0.081±0.966 | 1.89E-06 |
| cg14289461 | 6  | 112575929 | LAMA4    | -0.925±0.338 | -0.293±0.787 | 1.89E-06 |
| cg11277126 | 20 | 33680945  | TRPC4AP  | -2.514±0.288 | -2.995±0.591 | 1.90E-06 |
| cg04341806 | 13 | 46757395  | LCP1     | 1.812±0.421  | 1.282±0.604  | 1.90E-06 |
| cg26757673 | 22 | 37545423  | IL2RB    | 2.288±0.421  | 1.655±0.761  | 1.90E-06 |
| cg05860890 | 8  | 110986870 | KCNV1    | -3.418±0.354 | -2.495±1.184 | 1.92E-06 |
| cg11849692 | 10 | 103875969 | LDB1     | 1.66±0.316   | 2.147±0.589  | 1.93E-06 |
| cg16178491 | 12 | 101603996 | SLC5A8   | -4.116±0.491 | -3.141±1.225 | 1.93E-06 |
| cg20707333 | 20 | 58514079  | PPP1R3D  | 4.591±0.295  | 3.588±1.299  | 1.93E-06 |
| cg10065825 | 16 | 65157050  | CDH11    | -3.042±0.711 | -2.009±1.233 | 1.96E-06 |
| cg18552413 | 1  | 159174610 | DARC     | -0.486±0.165 | -1.039±0.716 | 1.97E-06 |
| cg27050793 | 19 | 36018925  | SBSN     | 2.865±0.183  | 2.27±0.771   | 1.99E-06 |
| cg00661485 | 5  | 169533372 | FOXI1    | 0.893±0.349  | 0.071±1.049  | 1.99E-06 |
| cg01731685 | 22 | 17565455  | IL17RA   | -4.427±0.456 | -3.791±0.752 | 2.00E-06 |
| cg06494782 | 12 | 52995446  | KRT72    | -0.334±0.255 | 0.188±0.66   | 2.00E-06 |
| cg03478689 | 5  | 83680717  | EDIL3    | -3.926±0.682 | -2.857±1.3   | 2.00E-06 |
| cg09079275 | 5  | 157003083 | ADAM19   | -3.569±0.302 | -2.649±1.189 | 2.00E-06 |
| cg16564824 | 20 | 10199536  | SNAP25   | -4.408±0.364 | -3.296±1.437 | 2.00E-06 |
| cg12315997 | 4  | 39461668  | LIAS     | -2.906±0.368 | -3.341±0.484 | 2.01E-06 |
| cg23402444 | 10 | 104178866 | PSD      | -4.28±0.366  | -3.489±1.003 | 2.02E-06 |
| cg15302379 | 10 | 102821848 | KAZALD1  | 1.329±0.194  | 0.82±0.655   | 2.02E-06 |
| cg19224837 | 14 | 95236615  | GSC      | -4.986±0.526 | -3.614±1.764 | 2.05E-06 |
| cg10784813 | 16 | 11348678  | SOCS1    | 0.428±0.297  | -0.333±0.978 | 2.06E-06 |
| cg00654814 | 17 | 74865068  | MGAT5B   | -2.523±0.263 | -1.778±0.963 | 2.07E-06 |
| cg06899329 | 19 | 19627922  | NDUFA13  | 2.599±0.408  | 1.955±0.785  | 2.08E-06 |
| cg24914244 | 6  | 107078674 | QRSL1    | 2.782±0.381  | 2.345±0.477  | 2.08E-06 |
| cg21509023 | 16 | 222380    | HBA2     | -4.355±0.592 | -3.16±1.509  | 2.10E-06 |
| cg22908581 | 12 | 6898975   | CD4      | -1.361±0.292 | -1.902±0.677 | 2.10E-06 |
| cg11226328 | 1  | 29213367  | EPB41    | -4.313±0.405 | -4.741±0.443 | 2.10E-06 |
| cg10673431 | 1  | 152010110 | S100A11  | 4.021±0.284  | 2.866±1.508  | 2.11E-06 |
| cg20668607 | 1  | 6762257   | DNAJC11  | 1.556±0.28   | 1±0.702      | 2.11E-06 |
| cg26540515 | 20 | 896349    | ANGPT4   | 1.471±0.196  | 0.901±0.739  | 2.11E-06 |
| cg25133753 | 20 | 44299726  | WDFC11   | 0.27±0.259   | -0.368±0.819 | 2.11E-06 |
| cg16211684 | 10 | 85954622  | CDHR1    | -4.243±0.275 | -3.37±1.133  | 2.12E-06 |
| cg19570545 | 1  | 201252472 | PKP1     | -5.16±0.651  | -4.148±1.232 | 2.13E-06 |
| cg23978322 | 6  | 97010439  | FHL5     | 1.449±0.176  | 1.054±0.504  | 2.14E-06 |
| cg07125166 | 3  | 48413613  | FBXW12   | 2.178±0.26   | 1.736±0.547  | 2.14E-06 |

|            |    |           |          |              |              |          |
|------------|----|-----------|----------|--------------|--------------|----------|
| cg23473904 | 21 | 47517690  | COL6A2   | -3.867±0.759 | -2.894±1.122 | 2.16E-06 |
| cg08016383 | 15 | 100882020 | ADAMTS17 | -4.357±0.386 | -3.211±1.486 | 2.17E-06 |
| cg24399405 | 16 | 189577    | NPRL3    | 3.246±0.23   | 2.623±0.805  | 2.17E-06 |
| cg09126273 | 12 | 15475767  | PTPRO    | -2.926±0.505 | -1.959±1.216 | 2.17E-06 |
| cg13410437 | 11 | 7818165   | OR5P2    | 2.983±0.348  | 2.245±0.939  | 2.17E-06 |
| cg25306170 | 13 | 37680502  | CSNK1A1L | 2.782±0.18   | 2.263±0.673  | 2.17E-06 |
| cg02019333 | 3  | 118892215 | UPK1B    | -0.878±0.33  | -0.251±0.789 | 2.18E-06 |
| cg00515905 | 1  | 110306507 | EPS8L3   | 3.154±0.343  | 2.441±0.905  | 2.20E-06 |
| cg12514506 | 11 | 3121286   | OSBPL5   | 2.487±0.285  | 2.098±0.459  | 2.21E-06 |
| cg00278366 | 12 | 110940287 | RAD9B    | -0.39±0.219  | -0.941±0.71  | 2.23E-06 |
| cg02364642 | 12 | 58005758  | ARHGEF25 | -2.495±0.362 | -1.764±0.927 | 2.24E-06 |
| cg23771661 | 19 | 17905332  | B3GNT3   | -0.172±0.293 | -0.719±0.687 | 2.24E-06 |
| cg10839997 | 11 | 66115647  | B3GNT1   | -4.841±0.544 | -3.794±1.321 | 2.24E-06 |
| cg00744433 | 21 | 18884067  | CXADR    | 0.52±0.28    | -0.221±0.957 | 2.24E-06 |
| cg24831427 | 6  | 99842353  | COQ3     | 1.098±0.362  | 0.476±0.773  | 2.24E-06 |
| cg26426582 | 4  | 165953193 | TRIM60   | 2.582±0.29   | 2.292±0.287  | 2.24E-06 |
| cg17067005 | 1  | 206945346 | IL10     | 2.788±0.264  | 2.447±0.396  | 2.26E-06 |
| cg13152535 | 19 | 51226557  | CLEC11A  | -1.998±0.332 | -1.372±0.789 | 2.26E-06 |
| cg22772878 | 19 | 2721800   | DIRAS1   | -1.517±0.255 | -1.021±0.626 | 2.27E-06 |
| cg13282837 | 14 | 96180648  | TCL1A    | -0.618±0.353 | 0.159±0.994  | 2.27E-06 |
| cg23748737 | 22 | 20791733  | SCARF2   | -3.63±0.633  | -2.696±1.128 | 2.28E-06 |
| cg21649520 | 8  | 82359799  | PMP2     | 1.826±0.28   | 1.281±0.69   | 2.28E-06 |
| cg03165378 | 1  | 153329882 | S100A9   | 1.583±0.353  | 1.001±0.718  | 2.28E-06 |
| cg17918700 | 11 | 65363503  | KCNK7    | 1.618±0.172  | 1.197±0.542  | 2.28E-06 |
| cg19970051 | 16 | 226184    | HBA1     | -4.127±0.528 | -3±1.438     | 2.29E-06 |
| cg17665193 | 10 | 26506008  | GAD2     | -3.709±0.434 | -3.004±0.869 | 2.29E-06 |
| cg22518733 | 17 | 34417575  | CCL3     | -0.753±0.309 | -1.586±1.079 | 2.29E-06 |
| cg10016608 | 17 | 34079665  | GAS2L2   | -0.522±0.19  | -0.959±0.56  | 2.30E-06 |
| cg20867633 | 1  | 204183116 | GOLT1A   | -2.824±0.358 | -3.315±0.582 | 2.31E-06 |
| cg05396987 | 4  | 122686269 | TMEM155  | -3.865±0.568 | -2.723±1.45  | 2.31E-06 |
| cg08918749 | 8  | 19797445  | LPL      | -3.146±0.575 | -2.207±1.16  | 2.32E-06 |
| cg00936626 | 3  | 196694856 | PIGZ     | 0.004±0.295  | 0.593±0.747  | 2.32E-06 |
| cg25657700 | 15 | 25123491  | SNRPN    | 0.872±0.798  | 1.692±0.838  | 2.34E-06 |
| cg20356482 | 9  | 97356092  | FBP2     | 0.935±0.288  | 1.546±0.781  | 2.34E-06 |
| cg02927346 | 17 | 34059260  | RASL10B  | -2.047±0.378 | -1.355±0.87  | 2.35E-06 |
| cg25430696 | 17 | 2240014   | TSR1     | -4.184±0.216 | -4.426±0.265 | 2.36E-06 |
| cg18020749 | 17 | 44372704  | LRRC37A  | 3.68±0.269   | 3.153±0.669  | 2.37E-06 |
| cg04405541 | 20 | 31870405  | BPIFB1   | 2.476±0.185  | 2.173±0.375  | 2.38E-06 |
| cg06952310 | 19 | 19327990  | NCAN     | 0.144±0.306  | -0.429±0.723 | 2.38E-06 |
| cg21554552 | 3  | 50378425  | RASSF1   | -4.499±0.85  | -2.846±2.096 | 2.40E-06 |
| cg04474832 | 3  | 52008487  | ABHD14B  | -1.624±0.174 | -1.918±0.366 | 2.41E-06 |
| cg24075743 | 16 | 11375385  | PRM1     | 1.159±0.286  | 1.58±0.51    | 2.41E-06 |
| cg00968931 | 19 | 3762178   | MRPL54   | 0.351±0.238  | -0.099±0.569 | 2.41E-06 |
| cg08840010 | 1  | 8000314   | TNFRSF9  | -0.13±0.339  | -0.699±0.707 | 2.41E-06 |
| cg05064352 | 22 | 45406545  | PHF21B   | -3.813±0.541 | -2.992±1.002 | 2.42E-06 |
| cg18913951 | 11 | 129685362 | TMEM45B  | 4.164±0.338  | 3.193±1.265  | 2.43E-06 |
| cg11732619 | 5  | 168728076 | SLIT3    | -3.651±0.899 | -2.205±1.786 | 2.43E-06 |
| cg12277666 | 1  | 179560870 | TDRD5    | -2.223±0.699 | -1.249±1.164 | 2.44E-06 |
| cg16792800 | 13 | 93879361  | GPC6     | -2.449±0.502 | -1.584±1.08  | 2.44E-06 |
| cg07294734 | 19 | 1242323   | ATP5D    | 0.138±0.224  | -0.277±0.524 | 2.44E-06 |
| cg03504078 | 5  | 140480218 | PCDHB3   | -0.416±0.402 | 0.097±0.595  | 2.45E-06 |
| cg03476195 | 4  | 113970745 | ANK2     | -3.243±0.386 | -2.519±0.915 | 2.45E-06 |
| cg10237469 | 19 | 42133409  | CEACAM4  | -1.175±0.231 | -1.569±0.492 | 2.46E-06 |
| cg11225410 | 12 | 93966317  | SOCS2    | -5.132±0.504 | -3.743±1.809 | 2.48E-06 |
| cg10887021 | 5  | 140474145 | PCDHB2   | -3.464±0.429 | -2.545±1.178 | 2.48E-06 |
| cg16779976 | 10 | 98031125  | BLNK     | -1.28±0.382  | -1.928±0.809 | 2.49E-06 |
| cg13030582 | 17 | 19290708  | MFAP4    | -1.182±0.276 | -0.66±0.661  | 2.50E-06 |
| cg05028467 | 5  | 176057097 | SNCB     | -3.154±0.549 | -2.136±1.286 | 2.52E-06 |
| cg25157408 | 20 | 7921059   | HAO1     | 1.899±0.303  | 1.374±0.658  | 2.52E-06 |
| cg22341104 | 1  | 92952261  | GFI1     | -4.215±0.59  | -2.843±1.771 | 2.53E-06 |
| cg26473272 | 11 | 1856268   | SYT8     | 2.196±0.347  | 1.65±0.673   | 2.53E-06 |
| cg02250787 | 13 | 47470989  | HTR2A    | -2.957±0.275 | -2.122±1.093 | 2.55E-06 |
| cg08056146 | 8  | 10588013  | SOX7     | -4.522±0.885 | -2.901±2.048 | 2.55E-06 |
| cg20692569 | 7  | 72848481  | FZD9     | -0.44±0.194  | 0.041±0.624  | 2.56E-06 |
| cg23606023 | 16 | 89042948  | CBFA2T3  | 0.735±0.234  | 0.207±0.68   | 2.57E-06 |
| cg11577097 | 15 | 58430682  | AQP9     | -1.194±0.245 | -1.753±0.721 | 2.58E-06 |
| cg20625138 | 1  | 7913667   | UTS2     | 0.106±0.279  | 0.69±0.748   | 2.58E-06 |

|            |    |           |           |              |              |          |
|------------|----|-----------|-----------|--------------|--------------|----------|
| cg23324787 | 11 | 36619694  | RAG2      | 2.066±0.329  | 1.637±0.504  | 2.58E-06 |
| cg27495908 | 9  | 90498223  | SPATA31E1 | 1.965±0.277  | 1.493±0.59   | 2.59E-06 |
| cg07580475 | 3  | 50304049  | SEMA3B    | 1.81±0.227   | 2.102±0.341  | 2.59E-06 |
| cg00690280 | 20 | 44332733  | WFDC10B   | 1.332±0.34   | 0.695±0.807  | 2.60E-06 |
| cg23867494 | 1  | 1150322   | TNFRSF4   | 0.361±0.205  | -0.256±0.808 | 2.60E-06 |
| cg23273897 | 3  | 154796861 | MME       | -2.617±0.238 | -1.825±1.041 | 2.61E-06 |
| cg20092036 | 12 | 109914141 | KCTD10    | -0.976±0.368 | -0.294±0.863 | 2.61E-06 |
| cg25434223 | 19 | 11591491  | ELAVL3    | -2.812±0.449 | -1.953±1.091 | 2.62E-06 |
| cg27257408 | 15 | 78526836  | ACSBG1    | 2.359±0.219  | 2.044±0.382  | 2.63E-06 |
| cg13669740 | 3  | 114012833 | TIGIT     | 2.367±0.337  | 1.845±0.644  | 2.63E-06 |
| cg24898863 | 1  | 153363580 | S100A8    | -1.08±0.25   | -1.641±0.724 | 2.63E-06 |
| cg14789590 | 22 | 32853844  | BPIFC     | 2.797±0.267  | 2.295±0.638  | 2.64E-06 |
| cg22920417 | 18 | 74401671  | 0         | -0.584±0.26  | -1.146±0.724 | 2.64E-06 |
| cg18655915 | 7  | 87109799  | 0         | 1.414±0.221  | 1.002±0.521  | 2.65E-06 |
| cg19439399 | 6  | 80656595  | ELOVL4    | -3.052±0.201 | -2.191±1.139 | 2.66E-06 |
| cg09914304 | 10 | 72362292  | PRF1      | 1.815±0.397  | 1.228±0.715  | 2.68E-06 |
| cg02166532 | 11 | 2159853   | IGF2      | -1.459±0.612 | -0.85±0.611  | 2.68E-06 |
| cg01985396 | 6  | 39760833  | DAAM2     | -0.494±0.234 | -0.086±0.513 | 2.69E-06 |
| cg17260124 | 11 | 77734744  | KCTD14    | 3.48±0.291   | 2.92±0.714   | 2.69E-06 |
| cg08823182 | 1  | 153514482 | S100A5    | -0.34±0.283  | 0.16±0.632   | 2.70E-06 |
| cg11821702 | 9  | 5891258   | MLANA     | 2.595±0.237  | 2.27±0.389   | 2.70E-06 |
| cg01643624 | 11 | 8954893   | C11orf16  | 1.533±0.213  | 1.114±0.535  | 2.71E-06 |
| cg15729869 | 9  | 135457839 | BARHL1    | -4.708±0.523 | -3.749±1.216 | 2.74E-06 |
| cg27462398 | 1  | 86174642  | ZNHIT6    | 2.7±0.383    | 1.744±1.244  | 2.74E-06 |
| cg24512400 | 19 | 51522561  | KLK10     | -4.91±0.644  | -3.962±1.158 | 2.75E-06 |
| cg26333317 | 12 | 51319063  | METTL7A   | -3.232±0.363 | -2.676±0.685 | 2.75E-06 |
| cg19409156 | 15 | 48413040  | SLC24A5   | 2.546±0.245  | 1.952±0.772  | 2.76E-06 |
| cg10951619 | 1  | 190447232 | FAM5C     | -2.816±0.311 | -2.157±0.849 | 2.76E-06 |
| cg00407150 | 3  | 42743794  | HHATL     | 1.113±0.218  | 0.609±0.654  | 2.77E-06 |
| cg21230133 | 17 | 39553520  | KRT31     | 1.967±0.19   | 1.606±0.46   | 2.77E-06 |
| cg11435943 | 18 | 61222687  | SERPINB12 | 1.201±0.321  | 0.451±0.974  | 2.77E-06 |
| cg26507477 | 1  | 104197869 | AMY1A     | 0.498±0.174  | 0.134±0.468  | 2.79E-06 |
| cg00689010 | 1  | 160311893 | NCSTN     | 1.148±0.245  | 0.528±0.809  | 2.80E-06 |
| cg02616808 | 5  | 176236654 | UNC5A     | -4.219±0.453 | -3.492±0.905 | 2.81E-06 |
| cg21652958 | 6  | 169653961 | THBS2     | -3.624±0.439 | -2.93±0.861  | 2.81E-06 |
| cg02789485 | 12 | 75783428  | GLIPR1L2  | -1.668±0.3   | -1.018±0.84  | 2.81E-06 |
| cg18838701 | 19 | 55668612  | TNNI3     | -2.055±0.712 | -1.171±1.027 | 2.83E-06 |
| cg12582965 | 15 | 25972328  | ATP10A    | 3.964±0.359  | 3.383±0.725  | 2.84E-06 |
| cg15928398 | 3  | 186647950 | ST6GAL1   | -2.471±0.845 | -1.354±1.327 | 2.84E-06 |
| cg23698287 | 1  | 32758300  | HDAC1     | -3.451±0.227 | -3.746±0.347 | 2.84E-06 |
| cg19264571 | 18 | 10454085  | APCDD1    | 0.14±0.262   | 0.83±0.903   | 2.84E-06 |
| cg16051027 | 20 | 32320358  | ZNF341    | -4.439±0.338 | -4.788±0.365 | 2.84E-06 |
| cg21972382 | 2  | 29339076  | CLIP4     | -3.572±0.444 | -4.117±0.629 | 2.84E-06 |
| cg22189286 | 12 | 119616193 | HSPB8     | 0.082±0.295  | 0.564±0.602  | 2.84E-06 |
| cg20095587 | 6  | 41130718  | TREM2     | 2.147±0.214  | 1.59±0.729   | 2.85E-06 |
| cg03133269 | 1  | 22468902  | WNT4      | -4.08±0.402  | -3.637±0.482 | 2.85E-06 |
| cg04425624 | 6  | 31543565  | TNF       | 0.368±0.358  | -0.455±1.069 | 2.85E-06 |
| cg21770145 | 17 | 79869997  | PCYT2     | 2.759±0.291  | 2.027±0.956  | 2.85E-06 |
| cg21129531 | 7  | 127670703 | LRRC4     | 1.169±0.51   | 1.979±1.007  | 2.85E-06 |
| cg10967280 | 12 | 91348999  | CCER1     | 4.815±0.276  | 4.498±0.354  | 2.86E-06 |
| cg13344740 | 7  | 96654132  | DLX5      | -1.477±0.343 | -0.804±0.863 | 2.87E-06 |
| cg24435704 | 7  | 139763773 | PARP12    | 3.201±0.361  | 2.544±0.835  | 2.90E-06 |
| cg06397510 | 1  | 32403634  | PTP4A2    | -4.74±0.557  | -4.077±0.758 | 2.90E-06 |
| cg05731779 | 5  | 72463687  | 0         | 2.709±0.237  | 2.143±0.738  | 2.90E-06 |
| cg01402255 | 1  | 153800699 | GATAD2B   | -0.534±0.22  | 0.006±0.705  | 2.92E-06 |
| cg20225681 | 15 | 65503447  | CILP      | 3.011±0.271  | 2.556±0.573  | 2.94E-06 |
| cg08763351 | 1  | 152943210 | SPRR4     | 1.884±0.437  | 1.117±0.97   | 2.96E-06 |
| cg13755070 | 11 | 128563714 | FLI1      | -4.41±0.515  | -3.225±1.541 | 2.96E-06 |
| cg16150435 | 6  | 31080529  | C6orf15   | 1.451±0.195  | 1.149±0.373  | 2.96E-06 |
| cg20795913 | 17 | 40718830  | MLX       | -0.179±0.205 | 0.181±0.455  | 2.99E-06 |
| cg17279839 | 7  | 150038598 | RARRES2   | -1.86±0.528  | -1.134±0.876 | 3.00E-06 |
| cg16776350 | 1  | 160549158 | CD84      | 0.211±0.375  | -0.533±0.957 | 3.01E-06 |
| cg20345978 | 1  | 26798271  | HMGN2     | -5.166±0.3   | -5.48±0.333  | 3.02E-06 |
| cg15052901 | 14 | 92788602  | SLC24A4   | -2.235±0.431 | -1.729±0.576 | 3.03E-06 |
| cg26309498 | 2  | 109607038 | EDAR      | 2.064±0.332  | 1.63±0.515   | 3.03E-06 |
| cg09511421 | 4  | 116034871 | NDST4     | -1.846±0.377 | -1.295±0.677 | 3.08E-06 |
| cg06697251 | 19 | 6501613   | TUBB4A    | -0.428±0.28  | 0.111±0.691  | 3.08E-06 |

|            |    |           |                 |              |              |          |
|------------|----|-----------|-----------------|--------------|--------------|----------|
| cg26366091 | 1  | 111770274 | <i>CHI3L2</i>   | -1.511±0.32  | -2.129±0.793 | 3.09E-06 |
| cg26929536 | 15 | 51973460  | <i>SCG3</i>     | -1.779±0.27  | -1.119±0.864 | 3.10E-06 |
| cg24392274 | 9  | 130921842 | <i>C9orf16</i>  | -0.929±0.223 | -1.453±0.685 | 3.10E-06 |
| cg03724882 | 14 | 54864244  | <i>CDKN3</i>    | -3.357±0.299 | -3.726±0.431 | 3.10E-06 |
| cg20543571 | 15 | 45248878  | <i>C15orf43</i> | 3.062±0.209  | 2.624±0.568  | 3.11E-06 |
| cg19601035 | 12 | 48399140  | <i>COL2A1</i>   | -1.908±0.304 | -1.306±0.775 | 3.11E-06 |
| cg25022327 | 11 | 128812462 | <i>TP53AIP1</i> | 3.12±0.356   | 2.495±0.794  | 3.12E-06 |
| cg07971188 | 6  | 31431100  | <i>HCP5</i>     | -2.24±0.332  | -2.796±0.701 | 3.12E-06 |
| cg00003994 | 7  | 15725862  | <i>MEOX2</i>    | -3.832±0.337 | -2.969±1.134 | 3.12E-06 |
| cg09495977 | 4  | 8271507   | <i>HTRA3</i>    | -4.143±0.519 | -2.986±1.507 | 3.12E-06 |
| cg08657449 | 8  | 105351661 | <i>DCSTAMP</i>  | 2.334±0.397  | 1.645±0.875  | 3.13E-06 |
| cg26344532 | 13 | 28494174  | <i>PDX1</i>     | -3.209±0.677 | -1.918±1.657 | 3.13E-06 |
| cg04488758 | 12 | 95945366  | <i>USP44</i>    | 1.214±0.292  | 1.709±0.625  | 3.14E-06 |
| cg01078689 | 19 | 43691869  | <i>PSG5</i>     | 1.049±0.168  | 0.843±0.24   | 3.15E-06 |
| cg18979491 | 20 | 36974445  | <i>LBP</i>      | -0.495±0.268 | -1.101±0.79  | 3.16E-06 |
| cg19378133 | 16 | 6068835   | <i>RBFOX1</i>   | -2.878±0.463 | -1.945±1.205 | 3.17E-06 |
| cg09829176 | 22 | 46545347  | <i>PPARA</i>    | -3.099±0.361 | -3.662±0.702 | 3.18E-06 |
| cg04748704 | 7  | 136553243 | <i>CHRM2</i>    | -3.364±0.449 | -2.755±0.734 | 3.19E-06 |
| cg01835489 | 12 | 53299310  | <i>KRT8</i>     | 0.77±0.238   | 0.066±0.931  | 3.19E-06 |
| cg27606341 | 5  | 39219632  | <i>FYB</i>      | 1.472±0.383  | 0.588±1.155  | 3.20E-06 |
| cg13507429 | 1  | 18807550  | <i>KLHDC7A</i>  | 0.076±0.29   | -0.407±0.609 | 3.20E-06 |
| cg05260966 | 22 | 33197394  | <i>TIMP3</i>    | -1.69±0.326  | -1.043±0.834 | 3.20E-06 |
| cg27420236 | 2  | 154334716 | <i>RPRM</i>     | -3.407±0.541 | -2.364±1.342 | 3.20E-06 |
| cg22473973 | 10 | 133794911 | <i>BNIP3</i>    | -2.923±0.327 | -2.424±0.621 | 3.22E-06 |
| cg18150721 | 3  | 134514881 | <i>EPHB1</i>    | -4.538±0.508 | -3.39±1.499  | 3.23E-06 |
| cg06616245 | 12 | 57854236  | <i>GLI1</i>     | -2.461±0.39  | -2.94±0.558  | 3.23E-06 |
| cg10073091 | 1  | 55352301  | <i>DHCR24</i>   | -2.793±0.327 | -3.208±0.491 | 3.23E-06 |
| cg04411625 | 14 | 105953462 | <i>CRIP1</i>    | -4.169±0.4   | -4.868±0.888 | 3.24E-06 |
| cg25028542 | 7  | 36429120  | <i>ANLN</i>     | -1.967±0.261 | -2.618±0.856 | 3.24E-06 |
| cg20721467 | 10 | 76597927  | <i>KAT6B</i>    | 0.877±0.222  | 1.166±0.344  | 3.24E-06 |
| cg01567482 | 5  | 176784318 | <i>RGS14</i>    | 1.541±0.362  | 0.988±0.687  | 3.26E-06 |
| cg11504897 | 6  | 6007412   | <i>NRN1</i>     | -2.639±0.208 | -1.863±1.034 | 3.26E-06 |
| cg23043245 | 6  | 34434076  | <i>PACIN1</i>   | -2.417±0.349 | -1.86±0.698  | 3.27E-06 |
| cg20579480 | 1  | 183622007 | <i>APOBEC4</i>  | -1.057±0.339 | -0.459±0.762 | 3.32E-06 |
| cg05203877 | 14 | 70655686  | <i>SLC8A3</i>   | -4.18±0.253  | -2.996±1.587 | 3.35E-06 |
| cg24027342 | 11 | 108131609 | <i>ATM</i>      | 1.66±0.464   | 1.243±0.375  | 3.35E-06 |
| cg24854010 | 12 | 1726033   | <i>WNT5B</i>    | 2.256±0.312  | 1.894±0.413  | 3.36E-06 |
| cg17264470 | 19 | 49260285  | <i>FGF21</i>    | 2.897±0.319  | 2.385±0.644  | 3.36E-06 |
| cg10494770 | 22 | 23922454  | <i>IGLL1</i>    | 0.652±0.189  | 0.318±0.427  | 3.36E-06 |
| cg07664183 | 9  | 19103231  | <i>HAUS6</i>    | -2.484±0.612 | -3.211±0.837 | 3.37E-06 |
| cg14436761 | 17 | 40912963  | <i>RAMP2</i>    | -3.938±0.393 | -2.946±1.307 | 3.40E-06 |
| cg06490951 | 18 | 580435    | <i>CETN1</i>    | 4.186±0.392  | 3.655±0.642  | 3.40E-06 |
| cg19589427 | 1  | 173019720 | <i>TNFSF18</i>  | -0.117±0.494 | 0.661±0.976  | 3.41E-06 |
| cg14845091 | 13 | 114107956 | <i>ADPRHL1</i>  | 1.501±0.174  | 1.787±0.361  | 3.43E-06 |
| cg17703324 | 1  | 203462465 | <i>OPTC</i>     | 3.007±0.224  | 2.44±0.747   | 3.43E-06 |
| cg09447105 | 12 | 15126020  | <i>PDE6H</i>    | 2.875±0.239  | 2.452±0.541  | 3.43E-06 |
| cg03907174 | 19 | 50030461  | <i>RCN3</i>     | 2.21±0.376   | 2.71±0.602   | 3.43E-06 |
| cg27394566 | 14 | 105391635 | <i>PLD4</i>     | 2.339±0.226  | 2.033±0.37   | 3.43E-06 |
| cg26924825 | 16 | 67977865  | <i>LCAT</i>     | 1.362±0.298  | 1.864±0.638  | 3.45E-06 |
| cg21885995 | 17 | 74069256  | <i>SRP68</i>    | 1.148±0.192  | 0.672±0.626  | 3.45E-06 |
| cg08209133 | 4  | 48485624  | <i>SLC10A4</i>  | -1.788±0.299 | -1.201±0.76  | 3.45E-06 |
| cg19636871 | 15 | 59499391  | <i>LDHAL6B</i>  | 3.548±0.214  | 3.248±0.366  | 3.45E-06 |
| cg09196942 | 1  | 12851619  | <i>PRAMEF1</i>  | 1.035±0.397  | 0.537±0.587  | 3.45E-06 |
| cg05067286 | 11 | 129686365 | <i>TMEM45B</i>  | -1.643±0.326 | -1.119±0.66  | 3.47E-06 |
| cg22419732 | 6  | 116832047 | <i>FAM26E</i>   | 2.189±0.327  | 1.705±0.599  | 3.48E-06 |
| cg03139377 | 12 | 323242    | <i>SLC6A12</i>  | -0.097±0.206 | -0.591±0.651 | 3.49E-06 |
| cg21194776 | 10 | 75314128  | <i>USP54</i>    | 1.071±0.209  | 1.42±0.443   | 3.49E-06 |
| cg03623878 | 13 | 113655560 | <i>MCF2L</i>    | -2.888±0.698 | -3.597±0.742 | 3.50E-06 |
| cg14607642 | 1  | 225617030 | <i>LBR</i>      | 1.022±0.26   | 0.594±0.541  | 3.52E-06 |
| cg24133115 | 6  | 166075520 | <i>PDE10A</i>   | -2.32±0.777  | -1.266±1.278 | 3.53E-06 |
| cg05657090 | 19 | 12917086  | <i>RNASEH2A</i> | 3.096±0.327  | 2.564±0.673  | 3.53E-06 |
| cg01413516 | 19 | 17932328  | <i>INSL3</i>    | 1.785±0.425  | 2.393±0.748  | 3.54E-06 |
| cg03312792 | 20 | 43849759  | <i>SEMG2</i>    | 2.85±0.213   | 2.359±0.645  | 3.55E-06 |
| cg12791465 | 8  | 133093721 | <i>HHLA1</i>    | 1.098±0.154  | 0.93±0.185   | 3.57E-06 |
| cg21279865 | 17 | 18430908  | <i>FAM106A</i>  | 2.081±0.279  | 1.704±0.457  | 3.57E-06 |
| cg04586023 | 22 | 50690380  | <i>HDAC10</i>   | -0.239±0.148 | -0.635±0.526 | 3.59E-06 |
| cg15974062 | 12 | 6833012   | <i>COPS7A</i>   | -4.357±0.345 | -4.773±0.484 | 3.60E-06 |

|            |    |           |                   |              |              |          |
|------------|----|-----------|-------------------|--------------|--------------|----------|
| cg24454143 | 13 | 28675265  | <i>FLT3</i>       | -2.082±0.317 | -1.513±0.732 | 3.61E-06 |
| cg00988256 | 19 | 11406173  | <i>TSPAN16</i>    | 2.933±0.203  | 2.643±0.357  | 3.61E-06 |
| cg15835232 | 17 | 53343075  | <i>HLF</i>        | -3.832±0.676 | -2.909±1.125 | 3.64E-06 |
| cg01556075 | 19 | 7741454   | <i>C19orf59</i>   | -3.015±0.345 | -3.476±0.556 | 3.65E-06 |
| cg16617137 | 19 | 52036199  | <i>SIGLEC6</i>    | 1.02±0.244   | 0.484±0.702  | 3.65E-06 |
| cg17162024 | 8  | 53478454  | <i>FAM150A</i>    | -3.117±0.676 | -1.973±1.457 | 3.65E-06 |
| cg08491964 | 18 | 53255771  | <i>TCF4</i>       | -2.73±0.237  | -2.086±0.854 | 3.67E-06 |
| cg14494313 | 8  | 18248453  | <i>NAT2</i>       | 2.137±0.234  | 1.848±0.341  | 3.68E-06 |
| cg09492887 | 7  | 103085978 | <i>SLC26A5</i>    | -3.039±0.384 | -2.186±1.12  | 3.68E-06 |
| cg08256781 | 19 | 6135510   | <i>ACSBG2</i>     | 2.778±0.284  | 2.204±0.748  | 3.70E-06 |
| cg08999895 | 11 | 2925869   | <i>SLC22A18AS</i> | 1.14±0.26    | 0.749±0.931  | 3.72E-06 |
| cg15209169 | 9  | 125702779 | <i>RABGAP1</i>    | -0.567±0.187 | -0.903±0.432 | 3.73E-06 |
| cg19690214 | 6  | 154678326 | <i>IPCEF1</i>     | 0.815±0.297  | 0.167±0.85   | 3.73E-06 |
| cg06912252 | 9  | 104248926 | <i>TMEM246</i>    | -4.863±0.659 | -3.796±1.352 | 3.73E-06 |
| cg16516400 | 1  | 231177201 | <i>FAM89A</i>     | -3.435±0.49  | -2.552±1.138 | 3.76E-06 |
| cg22064129 | 18 | 43194482  | <i>SLC14A2</i>    | 1.888±0.262  | 1.567±0.377  | 3.77E-06 |
| cg23144899 | 2  | 208994373 | <i>CRYGC</i>      | 1.858±0.191  | 1.604±0.308  | 3.80E-06 |
| cg12588301 | 1  | 152487335 | <i>CRCT1</i>      | 1.094±0.203  | 0.686±0.532  | 3.80E-06 |
| cg21942082 | 5  | 80690225  | <i>ACOT12</i>     | -4.429±0.497 | -3.492±1.213 | 3.80E-06 |
| cg16989248 | 7  | 56117955  | <i>PSPH</i>       | 2.908±0.277  | 2.335±0.749  | 3.81E-06 |
| cg22284975 | 7  | 40174843  | <i>C7orf10</i>    | -3.657±0.305 | -3.048±0.794 | 3.81E-06 |
| cg23660082 | 20 | 23732166  | <i>CST1</i>       | 1.204±0.256  | 0.784±0.535  | 3.81E-06 |
| cg04270835 | 11 | 22359188  | <i>SLC17A6</i>    | -3.583±0.383 | -2.61±1.29   | 3.81E-06 |
| cg12073779 | 2  | 208989469 | <i>CRYGD</i>      | -1.528±0.261 | -0.821±0.941 | 3.82E-06 |
| cg22766145 | 8  | 65492528  | <i>BHLHE22</i>    | -3.047±0.27  | -2.301±0.994 | 3.84E-06 |
| cg26232558 | 17 | 3195808   | <i>OR3A1</i>      | 1.696±0.261  | 1.26±0.556   | 3.84E-06 |
| cg11384427 | 12 | 6553585   | <i>CD27</i>       | 1.929±0.349  | 1.366±0.714  | 3.85E-06 |
| cg15585987 | 8  | 50824749  | <i>SNTG1</i>      | 0.276±0.249  | -0.244±0.681 | 3.85E-06 |
| cg00777121 | 3  | 50378191  | <i>RASSF1</i>     | -3.872±0.879 | -2.195±2.175 | 3.85E-06 |
| cg11328149 | 6  | 31689459  | <i>LY6G6C</i>     | 2.05±0.213   | 1.766±0.343  | 3.86E-06 |
| cg00239071 | 14 | 100789737 | <i>SLC25A47</i>   | 3.964±0.313  | 3.629±0.369  | 3.87E-06 |
| cg04761824 | 9  | 117905075 | <i>42705</i>      | 3.049±0.215  | 2.603±0.585  | 3.87E-06 |
| cg26866325 | 4  | 74920559  | <i>PPBPP2</i>     | -0.158±0.289 | -0.687±0.683 | 3.88E-06 |
| cg16514843 | 7  | 127255483 | <i>PAX4</i>       | 1.32±0.205   | 0.683±0.852  | 3.89E-06 |
| cg03649060 | 19 | 11665451  | <i>ELOF1</i>      | 1.038±0.367  | 0.571±0.558  | 3.89E-06 |
| cg26870566 | 1  | 157962475 | <i>KIRREL</i>     | 1.385±0.24   | 0.888±0.651  | 3.89E-06 |
| cg09025324 | 6  | 116691685 | <i>DSE</i>        | -2.912±0.426 | -2.07±1.098  | 3.90E-06 |
| cg22705929 | 11 | 57417974  | <i>YPEL4</i>      | -1.691±0.402 | -1.025±0.85  | 3.90E-06 |
| cg22598028 | 3  | 44626492  | <i>ZNF660</i>     | -3.563±0.59  | -2.348±1.591 | 3.90E-06 |
| cg13594711 | 7  | 76038785  | <i>SRCRB4D</i>    | 1.254±0.281  | 1.775±0.674  | 3.92E-06 |
| cg10533434 | 18 | 61329226  | <i>SERPINB3</i>   | 0.739±0.575  | 0.051±0.803  | 3.93E-06 |
| cg18595258 | 11 | 61128572  | <i>TMEM138</i>    | 0.541±0.214  | 0.125±0.542  | 3.93E-06 |
| cg22305782 | 16 | 30937214  | <i>FBXL19</i>     | 3.97±0.348   | 4.348±0.421  | 3.95E-06 |
| cg00113020 | 19 | 55173482  | <i>LILRB4</i>     | 2.249±0.377  | 1.808±0.511  | 3.95E-06 |
| cg08441170 | 10 | 26223100  | <i>MYO3A</i>      | -2.385±0.679 | -1.283±1.403 | 3.97E-06 |
| cg02090283 | 9  | 39288218  | <i>CNTNAP3</i>    | -4.726±0.865 | -3.492±1.529 | 4.00E-06 |
| cg22580512 | 12 | 125002474 | <i>NCOR2</i>      | -0.611±0.537 | 0.217±1.043  | 4.00E-06 |
| cg20674521 | 22 | 38850521  | <i>KCNJ4</i>      | -0.174±0.203 | -0.612±0.577 | 4.01E-06 |
| cg18871276 | 14 | 60386030  | <i>LRRC9</i>      | -3.724±0.266 | -2.443±1.734 | 4.01E-06 |
| cg07657236 | 3  | 19190202  | <i>KCNH8</i>      | -3.063±0.386 | -2.266±1.046 | 4.01E-06 |
| cg27641018 | 7  | 37959755  | <i>EPDR1</i>      | 1.69±0.269   | 1.113±0.758  | 4.01E-06 |
| cg18956481 | 20 | 52790139  | <i>CYP24A1</i>    | -3.328±0.44  | -2.405±1.212 | 4.03E-06 |
| cg17030820 | 10 | 51549260  | <i>MSMB</i>       | 2.836±0.297  | 2.048±1.051  | 4.04E-06 |
| cg20998885 | 20 | 18794833  | <i>SCP2D1</i>     | 2.343±0.233  | 1.81±0.705   | 4.07E-06 |
| cg10548978 | 10 | 72545053  | <i>TBATA</i>      | 1.336±0.364  | 0.708±0.808  | 4.07E-06 |
| cg20695587 | 4  | 68995759  | <i>TMPRSS11F</i>  | 0.916±0.248  | 0.3±0.818    | 4.08E-06 |
| cg23367478 | 12 | 20521299  | <i>PDE3A</i>      | -5.224±0.736 | -3.911±1.697 | 4.09E-06 |
| cg24222324 | 13 | 43145414  | <i>TNFSF11</i>    | 2.523±0.198  | 1.873±0.874  | 4.10E-06 |
| cg00930873 | 15 | 58357973  | <i>ALDH1A2</i>    | -3.017±0.37  | -2.114±1.2   | 4.14E-06 |
| cg05959508 | 1  | 209929512 | <i>TRAF3IP3</i>   | 0.903±0.363  | 0.198±0.921  | 4.17E-06 |
| cg16778148 | 11 | 2817922   | <i>KCNQ1</i>      | 3.305±0.331  | 2.905±0.471  | 4.17E-06 |
| cg01405761 | 8  | 62200689  | <i>CLVS1</i>      | -3.057±0.517 | -2.121±1.212 | 4.17E-06 |
| cg24675098 | 5  | 35617879  | <i>SPEF2</i>      | -2.776±0.764 | -3.739±1.154 | 4.19E-06 |
| cg22919728 | 3  | 126242490 | <i>CHST13</i>     | -0.197±0.323 | -0.806±0.794 | 4.19E-06 |
| cg18223379 | 20 | 31619647  | <i>BPIFB6</i>     | 1.365±0.252  | 0.704±0.882  | 4.21E-06 |
| cg17233506 | 17 | 46608293  | <i>HOXB1</i>      | 0.271±0.351  | 1.028±0.999  | 4.21E-06 |
| cg00830029 | 12 | 2943902   | <i>NRIP2</i>      | -0.688±0.402 | 0.074±0.993  | 4.22E-06 |

|            |    |           |               |              |              |          |
|------------|----|-----------|---------------|--------------|--------------|----------|
| cg00852964 | 6  | 133035150 | VNN1          | 0.099±0.308  | -0.486±0.763 | 4.22E-06 |
| cg06255227 | 20 | 62738125  | NPBWR2        | 2.321±0.32   | 1.592±0.967  | 4.23E-06 |
| cg05485062 | 14 | 94983863  | SERPINA12     | 3.134±0.362  | 2.438±0.909  | 4.26E-06 |
| cg03620376 | 19 | 54984272  | CDC42EP5      | -3.72±0.378  | -3.069±0.839 | 4.27E-06 |
| cg04979933 | 1  | 67266801  | INSL5         | 1.936±0.225  | 1.403±0.709  | 4.27E-06 |
| cg06240124 | 16 | 23690079  | PLK1          | -4.842±0.354 | -5.235±0.446 | 4.31E-06 |
| cg17791936 | 11 | 118902213 | SLC37A4       | 2.192±0.221  | 1.661±0.706  | 4.34E-06 |
| cg01965939 | 5  | 148442694 | SH3TC2        | -1.832±0.419 | -1.083±0.971 | 4.34E-06 |
| cg17185543 | 9  | 139760589 | EDF1          | -2.291±0.292 | -2.011±0.282 | 4.35E-06 |
| cg10089145 | 11 | 130030103 | ST14          | -1.864±0.493 | -2.509±0.784 | 4.35E-06 |
| cg03468463 | 18 | 61223564  | SERPINB12     | 1.894±0.27   | 1.158±0.987  | 4.36E-06 |
| cg13656062 | 19 | 16008723  | CYP4F2        | 2.65±0.303   | 2.07±0.759   | 4.38E-06 |
| cg10057295 | 13 | 99230004  | STK24         | -3.033±0.369 | -2.46±0.727  | 4.38E-06 |
| cg05722918 | 12 | 101603929 | SLC5A8        | -4.173±0.627 | -3.047±1.462 | 4.38E-06 |
| cg09745307 | 5  | 35048945  | AGXT2         | 0.571±0.314  | -0.029±0.784 | 4.41E-06 |
| cg24073022 | 9  | 108424034 | TAL2          | 3.196±0.327  | 2.58±0.804   | 4.42E-06 |
| cg01987509 | 11 | 101002045 | LOC101054525  | 0.949±0.253  | 0.353±0.793  | 4.42E-06 |
| cg11843304 | 12 | 15501337  | PTPRO         | 1.041±0.306  | 0.415±0.824  | 4.42E-06 |
| cg13514050 | 20 | 33460585  | GGT7          | -4.451±0.415 | -4.953±0.595 | 4.43E-06 |
| cg24110063 | 16 | 31439752  | COX6A2        | -0.381±0.291 | 0.239±0.819  | 4.44E-06 |
| cg12718440 | 10 | 99393576  | MORN4         | -1.142±0.228 | -1.637±0.655 | 4.46E-06 |
| cg01684579 | 5  | 175816834 | NOP16         | -0.578±0.22  | -0.989±0.536 | 4.48E-06 |
| cg21578207 | 1  | 44870088  | RNF220        | -0.619±0.297 | -1.095±0.608 | 4.49E-06 |
| cg08044694 | 19 | 15391927  | BRD4          | -1.812±0.546 | -0.954±1.093 | 4.49E-06 |
| cg09864712 | 16 | 726786    | RHBDL1        | 4.081±0.848  | 2.883±1.492  | 4.49E-06 |
| cg14037665 | 2  | 1748617   | PXDN          | -3.754±0.616 | -2.67±1.405  | 4.54E-06 |
| cg15060813 | 19 | 36428308  | LRFN3         | -0.551±0.342 | 0.098±0.849  | 4.55E-06 |
| cg18888520 | 19 | 58609806  | ZSCAN18       | -4.282±0.571 | -3.103±1.557 | 4.55E-06 |
| cg04001802 | 10 | 15085279  | OLAH          | 0.882±0.376  | 0.357±0.645  | 4.56E-06 |
| cg25919221 | 1  | 9006680   | CA6           | 0.753±0.335  | 0.294±0.568  | 4.57E-06 |
| cg02643667 | 21 | 43786699  | TFF1          | 2.217±0.295  | 1.528±0.918  | 4.57E-06 |
| cg19921389 | 3  | 128780164 | GP9           | 2.848±0.249  | 2.523±0.396  | 4.58E-06 |
| cg27447740 | 20 | 61148587  | C20orf166-AS1 | -4.137±0.371 | -3.367±1.017 | 4.59E-06 |
| cg12317456 | 16 | 55512868  | MMP2          | -3.119±0.427 | -1.975±1.537 | 4.61E-06 |
| cg09543783 | 19 | 47248096  | FKRP          | 2.538±0.298  | 2.897±0.425  | 4.62E-06 |
| cg15586352 | 19 | 43691143  | PSG5          | 0.804±0.142  | 0.512±0.386  | 4.62E-06 |
| cg03399971 | 12 | 57828847  | INHBC         | 2.509±0.219  | 2.76±0.291   | 4.63E-06 |
| cg02430692 | 3  | 179754239 | PEX5L         | -4.092±0.465 | -3.342±0.961 | 4.64E-06 |
| cg02415431 | 22 | 23923255  | IGLL1         | 0.272±0.301  | -0.325±0.787 | 4.67E-06 |
| cg06557358 | 17 | 32907002  | C17orf102     | -4.407±0.511 | -3.264±1.521 | 4.67E-06 |
| cg06200697 | 11 | 57528838  | CTNND1        | -1.128±0.355 | -0.495±0.824 | 4.67E-06 |
| cg01897036 | 2  | 120282327 | SCTR          | 2.96±0.462   | 2.66±1.185   | 4.69E-06 |
| cg09018862 | 19 | 42882644  | MEGF8         | 2.104±0.222  | 1.662±0.583  | 4.70E-06 |
| cg01661993 | 19 | 54926966  | TTYH1         | -3.121±0.313 | -2.284±1.126 | 4.72E-06 |
| cg11189837 | 21 | 28218596  | ADAMTS1       | -3.852±0.52  | -2.985±1.119 | 4.72E-06 |
| cg16604516 | 3  | 13590419  | FBLN2         | -2.008±0.477 | -1.218±1.02  | 4.73E-06 |
| cg19241311 | 20 | 30028893  | DEFB123       | 0.792±0.319  | 0.2±0.775    | 4.75E-06 |
| cg10467098 | 11 | 65687892  | DRAP1         | -1.586±0.276 | -1.069±0.678 | 4.79E-06 |
| cg02255004 | 4  | 80748660  | PCAT4         | 1.488±0.225  | 0.909±0.777  | 4.82E-06 |
| cg06230736 | 10 | 8096650   | GATA3         | -2.801±0.363 | -1.494±1.778 | 4.83E-06 |
| cg13180098 | 3  | 129246923 | RHO           | 1.075±0.281  | 0.638±0.556  | 4.85E-06 |
| cg21988041 | 12 | 104444060 | GLT8D2        | -4.508±0.424 | -3.49±1.364  | 4.85E-06 |
| cg11857445 | 17 | 35305905  | AATF          | -3.733±0.393 | -4.11±0.387  | 4.85E-06 |
| cg10347418 | 1  | 23693926  | ZNF436        | 2.471±0.254  | 1.764±0.954  | 4.90E-06 |
| cg25780543 | 7  | 154862770 | LOC100128264  | -0.54±0.302  | 0.027±0.745  | 4.90E-06 |
| cg08368934 | 16 | 57701455  | GPR97         | 0.891±0.311  | 0.203±0.916  | 4.91E-06 |
| cg08450168 | 1  | 28918231  | RAB42         | 2.752±0.295  | 2.459±0.31   | 4.92E-06 |
| cg19664945 | 2  | 54087343  | GPR75         | 0.121±0.247  | 0.701±0.776  | 4.93E-06 |
| cg22970435 | 6  | 44310228  | SPATS1        | -2.134±0.323 | -1.335±1.072 | 4.93E-06 |
| cg06303238 | 20 | 50418959  | SALL4         | 1.095±0.409  | 1.869±1.018  | 4.93E-06 |
| cg22199080 | 12 | 58135833  | AGAP2         | -1.748±0.332 | -2.44±0.919  | 4.93E-06 |
| cg23323671 | 1  | 26233623  | STMN1         | -0.159±0.273 | -0.696±0.708 | 4.97E-06 |
| cg07846220 | 18 | 7117680   | LAMA1         | -2.748±0.916 | -1.42±1.674  | 4.99E-06 |
| cg04856858 | 2  | 236402015 | AGAP1         | -2.89±0.5    | -2.037±1.108 | 5.00E-06 |
| cg02629257 | 17 | 19271627  | B9D1          | 2.435±0.325  | 1.93±0.647   | 5.01E-06 |
| cg09628601 | 19 | 47523630  | NPAS1         | -3.222±0.45  | -2.368±1.124 | 5.03E-06 |
| cg03375833 | 3  | 9859360   | TTLL3         | 1.931±0.446  | 1.337±0.733  | 5.04E-06 |

|             |    |           |                  |              |              |          |
|-------------|----|-----------|------------------|--------------|--------------|----------|
| cg02983451  | 2  | 10183013  | <i>KLF11</i>     | -4.253±0.615 | -3.461±0.968 | 5.07E-06 |
| cg22045288  | 10 | 134258421 | <i>C10orf91</i>  | 0.638±0.245  | 0.182±0.599  | 5.07E-06 |
| cg04747322  | 5  | 121647308 | <i>SNCAIP</i>    | -2.111±0.33  | -1.303±1.086 | 5.08E-06 |
| cg24063470  | 16 | 86600389  | <i>FOXC2</i>     | -4.361±0.467 | -3.521±1.099 | 5.08E-06 |
| cg11403598  | 16 | 69374664  | <i>COG8</i>      | 0.557±0.223  | 0.176±0.495  | 5.09E-06 |
| cg12554476  | 16 | 20338808  | <i>GP2</i>       | 1.722±0.299  | 1.07±0.87    | 5.11E-06 |
| cg07658590  | 21 | 46963587  | <i>SLC19A1</i>   | -0.726±0.23  | -0.187±0.723 | 5.11E-06 |
| cg13614181  | 13 | 42031103  | <i>RGCC</i>      | -2.801±0.337 | -2.196±0.793 | 5.12E-06 |
| cg12530021  | 19 | 52004630  | <i>SIGLEC12</i>  | -0.163±0.156 | -0.656±0.67  | 5.12E-06 |
| cg00098162  | 10 | 90619573  | <i>0</i>         | 2.109±0.21   | 1.875±0.268  | 5.14E-06 |
| cg26251865  | 19 | 44220214  | <i>IRGC</i>      | -1.295±0.32  | -0.74±0.723  | 5.14E-06 |
| cg08040471  | 17 | 80407779  | <i>C17orf62</i>  | 0.799±0.478  | -0.079±1.154 | 5.15E-06 |
| cg02327719  | 1  | 26185386  | <i>AUNIP</i>     | -1.163±0.233 | -1.63±0.62   | 5.16E-06 |
| cg02288165  | 20 | 3687992   | <i>SIGLEC1</i>   | -0.545±0.353 | -1.037±0.617 | 5.18E-06 |
| cg21949781  | 18 | 43652366  | <i>PSTPIP2</i>   | -4.496±0.773 | -3.597±1.056 | 5.18E-06 |
| cg18938204  | 20 | 39994857  | <i>EMILIN3</i>   | -2.851±0.504 | -1.925±1.217 | 5.18E-06 |
| cg18638496  | 4  | 81187198  | <i>FGF5</i>      | -3.15±0.291  | -2.411±0.996 | 5.18E-06 |
| cg18489434  | 14 | 77228510  | <i>VASH1</i>     | -5.575±0.616 | -4.416±1.527 | 5.19E-06 |
| cg06034822  | 1  | 161016081 | <i>USF1</i>      | -2.266±0.291 | -2.599±0.387 | 5.19E-06 |
| cg21633698  | 11 | 119294534 | <i>THY1</i>      | 1.646±0.279  | 0.954±0.932  | 5.22E-06 |
| cg09610963  | 17 | 44372720  | <i>LRRC37A</i>   | 2.908±0.171  | 2.558±0.464  | 5.22E-06 |
| cg17886204  | 15 | 100346994 | <i>DNM1P46</i>   | -5.803±0.743 | -4.012±2.409 | 5.23E-06 |
| cg20588045  | 10 | 56561096  | <i>PCDH15</i>    | -1.832±0.292 | -1.283±0.723 | 5.23E-06 |
| cg24662718  | 1  | 108507468 | <i>VAV3</i>      | -3.789±0.261 | -2.441±1.853 | 5.25E-06 |
| cg26015133  | 1  | 161692247 | <i>FCRLB</i>     | 2.2±0.158    | 1.834±0.492  | 5.29E-06 |
| cg16899306  | 6  | 32732585  | <i>HLA-DQB2</i>  | 1.496±0.573  | 0.696±1.003  | 5.30E-06 |
| cg19154438  | 19 | 45825730  | <i>CKM</i>       | 1.244±0.255  | 0.742±0.666  | 5.32E-06 |
| cg13590277  | 5  | 150019496 | <i>SYNPO</i>     | -1.456±0.287 | -1.05±0.51   | 5.32E-06 |
| cg08448751  | 3  | 52479601  | <i>SEMA3G</i>    | 1.746±0.217  | 2.08±0.427   | 5.33E-06 |
| cg09296212  | 9  | 130828969 | <i>NAIF1</i>     | 2.253±0.204  | 1.848±0.538  | 5.34E-06 |
| cg17040807  | 17 | 74533282  | <i>CYGB</i>      | -0.526±0.232 | -0.078±0.592 | 5.34E-06 |
| cg18312429  | 13 | 103718930 | <i>SLC10A2</i>   | 0.141±0.256  | -0.376±0.687 | 5.35E-06 |
| cg24641352  | 8  | 144328078 | <i>ZFP41</i>     | -0.398±0.34  | 0.268±0.883  | 5.36E-06 |
| cg10207917  | 17 | 61997029  | <i>GH1</i>       | 0.258±0.093  | 0.033±0.303  | 5.39E-06 |
| cg23915111  | 1  | 200589553 | <i>KIF14</i>     | -2.616±0.189 | -2.817±0.227 | 5.42E-06 |
| cg15840985  | 3  | 32023475  | <i>OSBPL10</i>   | -0.296±0.334 | -0.811±0.661 | 5.42E-06 |
| cg23828595  | 10 | 52833610  | <i>PRKG1</i>     | -4.382±0.61  | -3.254±1.487 | 5.42E-06 |
| cg12343082  | 16 | 87970145  | <i>CA5A</i>      | 1.954±0.196  | 1.494±0.618  | 5.42E-06 |
| cg09630404  | 8  | 38008543  | <i>STAR</i>      | -4.261±0.383 | -3.277±1.332 | 5.44E-06 |
| cg22199118  | 8  | 69350927  | <i>C8orf34</i>   | 0.115±0.281  | -0.586±0.946 | 5.45E-06 |
| cg26112901  | 6  | 137494988 | <i>IL22RA2</i>   | 3.024±0.298  | 2.422±0.801  | 5.46E-06 |
| cg271133864 | 6  | 26216541  | <i>HIST1H2BG</i> | -3.463±0.411 | -2.506±1.288 | 5.47E-06 |
| cg06088314  | 2  | 201730276 | <i>CLK1</i>      | 3.343±0.284  | 2.773±0.758  | 5.50E-06 |
| cg12970008  | 11 | 3186095   | <i>OSBPL5</i>    | -3.653±0.528 | -2.836±1.051 | 5.51E-06 |
| cg26450866  | 19 | 49576241  | <i>KCNA7</i>     | -4.283±0.498 | -3.491±1.024 | 5.54E-06 |
| cg16377872  | 19 | 15084823  | <i>SLC1A6</i>    | 1.877±0.271  | 1.246±0.849  | 5.55E-06 |
| cg12268344  | 16 | 11374723  | <i>PRM1</i>      | 2.598±0.185  | 2.191±0.546  | 5.55E-06 |
| cg16773028  | 1  | 111148339 | <i>KCNA2</i>     | 0.272±0.269  | 0.875±0.811  | 5.58E-06 |
| cg10918202  | 8  | 104153173 | <i>BAALC</i>     | -3.318±0.524 | -2.426±1.165 | 5.59E-06 |
| cg16879115  | 12 | 7819180   | <i>APOBEC1</i>   | 0.99±0.334   | 0.439±0.716  | 5.59E-06 |
| cg13560436  | 5  | 56248587  | <i>MIER3</i>     | -2.091±0.329 | -1.564±0.682 | 5.59E-06 |
| cg03945021  | 16 | 24682074  | <i>0</i>         | -2.207±0.406 | -1.549±0.854 | 5.60E-06 |
| cg25787984  | 11 | 12031508  | <i>DKK3</i>      | 0.014±0.252  | -0.493±0.675 | 5.61E-06 |
| cg19521927  | 1  | 20395367  | <i>PLA2G5</i>    | 1.46±0.25    | 0.881±0.78   | 5.61E-06 |
| cg07359545  | 22 | 19711327  | <i>GP1BB</i>     | 0.167±0.174  | -0.271±0.593 | 5.64E-06 |
| cg15787039  | 15 | 32934185  | <i>SCG5</i>      | -0.95±0.341  | -0.369±0.759 | 5.65E-06 |
| cg07052880  | 2  | 71161697  | <i>ATP6V1B1</i>  | 2.844±0.224  | 2.595±0.289  | 5.66E-06 |
| cg00687686  | 16 | 58497236  | <i>NDRG4</i>     | -4.698±0.334 | -3.726±1.324 | 5.67E-06 |
| cg04523589  | 3  | 48265146  | <i>CAMP</i>      | 2.849±0.342  | 2.214±0.84   | 5.68E-06 |
| cg10052840  | 19 | 4558119   | <i>SEMA6B</i>    | 0.233±0.247  | -0.182±0.541 | 5.70E-06 |
| cg00410576  | 15 | 52311136  | <i>MAPK6</i>     | -5.036±0.39  | -5.458±0.481 | 5.73E-06 |
| cg05556202  | 3  | 196065106 | <i>TM4SF19</i>   | 1.583±0.275  | 0.893±0.935  | 5.73E-06 |
| cg25427580  | 2  | 168675357 | <i>B3GALT1</i>   | 2.941±0.362  | 2.2±0.99     | 5.73E-06 |
| cg22386311  | 18 | 28898907  | <i>DSG1</i>      | 0.482±0.252  | 0.015±0.618  | 5.73E-06 |
| cg22679003  | 18 | 25756510  | <i>CDH2</i>      | -3.988±0.334 | -3.11±1.193  | 5.73E-06 |
| cg23623692  | 15 | 26003464  | <i>ATP10A</i>    | 2.261±0.318  | 1.86±0.49    | 5.74E-06 |
| cg05384917  | 12 | 123200953 | <i>HCAR3</i>     | 3.342±0.373  | 2.685±0.864  | 5.75E-06 |

|            |    |           |          |              |              |          |
|------------|----|-----------|----------|--------------|--------------|----------|
| cg19286604 | 11 | 125365138 | FEZ1     | -2.988±0.411 | -2.161±1.104 | 5.75E-06 |
| cg07832674 | 3  | 9943884   | IL17RE   | 0.253±0.38   | -0.313±0.725 | 5.76E-06 |
| cg23174481 | 19 | 7562555   | C19orf45 | 2.151±0.301  | 1.801±0.414  | 5.77E-06 |
| cg19132372 | 2  | 207079152 | GPR1     | 2.305±0.223  | 1.783±0.706  | 5.79E-06 |
| cg27352992 | 12 | 41087092  | CNTN1    | -3.362±0.487 | -2.525±1.098 | 5.80E-06 |
| cg23566503 | 20 | 36149750  | NNAT     | 0.989±0.181  | 1.354±0.487  | 5.80E-06 |
| cg06142324 | 11 | 124805538 | HEPACAM  | 2.759±0.363  | 1.996±1.023  | 5.83E-06 |
| cg16575408 | 11 | 102669291 | MMP1     | 3.65±0.308   | 2.878±1.048  | 5.85E-06 |
| cg01637734 | 1  | 157811303 | CD5L     | 1.822±0.234  | 1.08±1.017   | 5.85E-06 |
| cg10201668 | 15 | 45422393  | DUOX1    | -1.847±0.486 | -1.187±0.827 | 5.87E-06 |
| cg00620024 | 9  | 127952891 | PPP6C    | 1.332±0.268  | 0.706±0.846  | 5.88E-06 |
| cg18114671 | 18 | 31803836  | NOL4     | -3.474±0.341 | -2.839±0.841 | 5.88E-06 |
| cg07074571 | 6  | 161695561 | AGPAT4   | -1.812±0.266 | -1.454±0.449 | 5.95E-06 |
| cg17663463 | 19 | 57349709  | PEG3     | 0.801±0.198  | 1.249±0.605  | 5.97E-06 |
| cg06141025 | 12 | 21757466  | GYS2     | 0.364±0.223  | 0.736±0.487  | 6.00E-06 |
| cg06641366 | 1  | 90097604  | FLJ27354 | 1.408±0.242  | 2.073±0.907  | 6.03E-06 |
| cg03160135 | 6  | 117586918 | VGLL2    | -1.978±0.243 | -1.226±1.032 | 6.07E-06 |
| cg14823162 | 6  | 99281628  | POU3F2   | -3.832±0.487 | -2.975±1.13  | 6.07E-06 |
| cg08631151 | 17 | 45056976  | RPRML    | -4.532±0.391 | -3.844±0.909 | 6.08E-06 |
| cg11871280 | 12 | 60082038  | SLC16A7  | 2.584±0.265  | 1.81±1.06    | 6.08E-06 |
| cg11784785 | 11 | 20620089  | SLC6A5   | -3.313±0.263 | -2.857±0.6   | 6.10E-06 |
| cg07459489 | 8  | 118147163 | SLC30A8  | 2.342±0.308  | 1.47±1.192   | 6.11E-06 |
| cg24877842 | 3  | 42201898  | TRAK1    | -1.403±0.433 | -0.814±0.74  | 6.14E-06 |
| cg01618660 | 9  | 100882376 | TRIM14   | 2.814±0.297  | 2.368±0.575  | 6.18E-06 |
| cg15756091 | 1  | 182419655 | RGSL1    | 2.064±0.21   | 1.465±0.82   | 6.21E-06 |
| cg26181372 | 9  | 104198262 | ALDOB    | 1.552±0.231  | 1.053±0.673  | 6.22E-06 |
| cg07476030 | 6  | 107078648 | QRSL1    | 1.218±0.254  | 0.806±0.537  | 6.22E-06 |
| cg07845390 | 1  | 196577709 | KCNT2    | -4.304±0.43  | -3.488±1.087 | 6.25E-06 |
| cg19777470 | 15 | 78633455  | CRABP1   | -3.768±0.484 | -2.901±1.148 | 6.26E-06 |
| cg08132711 | 4  | 15964743  | FGFBP2   | 0.565±0.304  | -0.023±0.787 | 6.27E-06 |
| cg14738823 | 12 | 15090958  | ERP27    | 1.473±0.258  | 0.971±0.67   | 6.27E-06 |
| cg14934821 | 9  | 139228820 | GPSM1    | 2.277±0.351  | 1.661±0.813  | 6.28E-06 |
| cg00096922 | 7  | 96654185  | DLX5     | -4.433±0.485 | -3.506±1.237 | 6.29E-06 |
| cg02945019 | 1  | 160550488 | CD84     | -0.117±0.248 | -0.754±0.869 | 6.29E-06 |
| cg13500819 | 5  | 138725400 | MZB1     | 1.816±0.409  | 1.271±0.683  | 6.31E-06 |
| cg05755354 | 10 | 14372596  | FRMD4A   | 1.474±0.243  | 1.916±0.588  | 6.35E-06 |
| cg12164282 | 2  | 1748112   | PXDN     | -1.479±1.074 | -0.416±1.148 | 6.35E-06 |
| cg19662708 | 11 | 12785573  | TEAD1    | 1.234±0.351  | 0.853±0.439  | 6.35E-06 |
| cg07380496 | 5  | 71403420  | MAP1B    | -4.591±0.965 | -3.258±1.687 | 6.36E-06 |
| cg16483916 | 19 | 5567758   | TINCR    | -2.361±0.534 | -1.667±0.864 | 6.36E-06 |
| cg15910208 | 19 | 51522588  | KLK10    | -4.941±0.505 | -4.284±0.818 | 6.36E-06 |
| cg22029275 | 13 | 25745784  | AMER2    | -3.852±0.543 | -2.526±1.805 | 6.42E-06 |
| cg12491659 | 5  | 57786356  | GAPT     | 0.977±0.356  | 0.321±0.874  | 6.42E-06 |
| cg02515725 | 4  | 186456935 | PDLIM3   | -3.095±0.47  | -2.577±0.602 | 6.47E-06 |
| cg16853860 | 6  | 32823116  | PSMB9    | 0.197±0.314  | -0.349±0.721 | 6.48E-06 |
| cg22778947 | 9  | 108211064 | FSD1L    | -2.401±0.441 | -1.938±0.524 | 6.49E-06 |
| cg21817450 | 13 | 44240722  | ENOX1    | 2.344±0.253  | 1.842±0.673  | 6.50E-06 |
| cg11269533 | 2  | 219850301 | FEV      | -3.179±0.283 | -2.472±0.965 | 6.52E-06 |
| cg24926042 | 12 | 52799999  | KRT82    | 0.84±0.198   | 0.404±0.591  | 6.53E-06 |
| cg17749456 | 19 | 55792696  | HSPBP1   | -2.111±0.371 | -1.448±0.879 | 6.54E-06 |
| cg24399106 | 4  | 183065224 | MGC45800 | -3.824±0.321 | -3.192±0.848 | 6.55E-06 |
| cg14417329 | 17 | 80186273  | SLC16A3  | -1±0.321     | -1.636±0.853 | 6.56E-06 |
| cg07443748 | 22 | 17073594  | CCT8L2   | 0.821±0.296  | 0.212±0.82   | 6.57E-06 |
| cg12643877 | 17 | 43502145  | ARHGAP27 | 1.331±0.18   | 1.081±0.317  | 6.58E-06 |
| cg20725021 | 3  | 187009575 | MASP1    | -0.149±0.28  | 0.38±0.707   | 6.59E-06 |
| cg06577725 | 3  | 172858917 | SPATA16  | 1.356±0.259  | 0.654±0.963  | 6.60E-06 |
| cg09069593 | 16 | 57576285  | GPR114   | -0.088±0.272 | -0.783±0.95  | 6.61E-06 |
| cg20979799 | 6  | 117198560 | RFX6     | -2.073±0.35  | -1.375±0.937 | 6.61E-06 |
| cg04101379 | 13 | 96297197  | DZIP1    | -3.811±0.483 | -2.893±1.229 | 6.66E-06 |
| cg14659404 | 1  | 177134019 | ASTN1    | -2.468±0.205 | -1.825±0.888 | 6.67E-06 |
| cg13626881 | 1  | 203059178 | 0        | 1.014±0.198  | 0.625±0.522  | 6.69E-06 |
| cg20158826 | 11 | 66359489  | CCDC87   | 2.099±0.305  | 1.757±0.404  | 6.70E-06 |
| cg11546621 | 9  | 139872161 | PTGDS    | 0.57±0.211   | 0.906±0.439  | 6.70E-06 |
| cg10193817 | 11 | 115375226 | CADM1    | -3.632±0.776 | -2.76±1.027  | 6.75E-06 |
| cg14654731 | 4  | 122685145 | PP12613  | 1.231±0.292  | 0.67±0.751   | 6.77E-06 |
| cg09191232 | 4  | 108642411 | PAPSS1   | -0.602±0.29  | -1.284±0.929 | 6.81E-06 |
| cg15554401 | 1  | 35226891  | GJB4     | 2.749±0.396  | 2.262±0.598  | 6.86E-06 |

|            |    |           |          |              |              |          |
|------------|----|-----------|----------|--------------|--------------|----------|
| cg12582959 | 19 | 56159199  | CCDC106  | -1.519±0.425 | -0.781±0.979 | 6.91E-06 |
| cg01566170 | 1  | 223899746 | CAPN2    | 0.276±0.259  | -0.325±0.82  | 6.96E-06 |
| cg24310246 | 19 | 3773172   | RAX2     | 1.326±0.298  | 0.945±0.475  | 6.96E-06 |
| cg10904672 | 1  | 149753367 | FCGR1A   | 1.536±0.26   | 1.139±0.516  | 6.97E-06 |
| cg20342082 | 1  | 228003402 | PRSS38   | 4.089±0.321  | 3.485±0.809  | 6.97E-06 |
| cg18705776 | 10 | 5565829   | CALML3   | 1.837±0.308  | 1.411±0.543  | 6.97E-06 |
| cg21688264 | 6  | 84418724  | SNAP91   | -4.221±0.941 | -2.798±1.848 | 6.98E-06 |
| cg16834187 | 16 | 50404286  | BRD7     | 2.415±0.324  | 1.998±0.521  | 6.99E-06 |
| cg12941369 | 3  | 33839389  | PDCD6IP  | -1.269±0.18  | -1.574±0.403 | 7.01E-06 |
| cg12319004 | 1  | 226078237 | LEFTY1   | 1.641±0.153  | 1.259±0.523  | 7.05E-06 |
| cg24461814 | 12 | 52779281  | KRT84    | 2.563±0.206  | 2.151±0.555  | 7.05E-06 |
| cg25187533 | 19 | 43586787  | PSG2     | 0.116±0.104  | -0.112±0.31  | 7.05E-06 |
| cg03386869 | 13 | 102104848 | ITGBL1   | 1.304±0.409  | 1.838±0.669  | 7.05E-06 |
| cg20664247 | 1  | 2345475   | PEX10    | -0.053±0.146 | -0.428±0.515 | 7.05E-06 |
| cg14784653 | 10 | 13545008  | BEND7    | 1.669±0.24   | 1.225±0.595  | 7.08E-06 |
| cg07253191 | 11 | 34936862  | PDHX     | -2.044±0.33  | -2.474±0.54  | 7.12E-06 |
| cg11946165 | 1  | 150781434 | CTSK     | 1.241±0.289  | 1.662±0.544  | 7.13E-06 |
| cg08970446 | 1  | 53608262  | SLC1A7   | 4.132±0.322  | 3.716±0.521  | 7.13E-06 |
| cg10671802 | 17 | 27230278  | DHRS13   | -4.579±0.373 | -4.955±0.416 | 7.14E-06 |
| cg27043141 | 3  | 111851265 | GCSAM    | 1.196±0.355  | 0.77±0.518   | 7.15E-06 |
| cg24576425 | 2  | 158114404 | GALNT5   | -2.281±0.458 | -1.584±0.907 | 7.17E-06 |
| cg06479216 | 9  | 21218462  | IFNA16   | 0.658±0.3    | 0.23±0.542   | 7.17E-06 |
| cg01580568 | 1  | 209825856 | LAMB3    | 1.363±0.38   | 0.618±1.004  | 7.21E-06 |
| cg20797766 | 16 | 2770866   | PRSS27   | -4.104±0.344 | -4.498±0.47  | 7.24E-06 |
| cg06626655 | 1  | 38099916  | RSPO1    | -3.455±0.405 | -2.716±0.989 | 7.24E-06 |
| cg18277754 | 2  | 30144152  | ALK      | -3.799±0.508 | -2.867±1.248 | 7.24E-06 |
| cg15613048 | 1  | 21044031  | KIF17    | -4.683±1.069 | -3.25±1.814  | 7.24E-06 |
| cg12071073 | 13 | 52436281  | CCDC70   | 2.103±0.325  | 1.705±0.489  | 7.26E-06 |
| cg03714397 | 1  | 91818834  | HFM1     | 2.334±0.359  | 1.89±0.548   | 7.28E-06 |
| cg01585703 | 15 | 40074646  | FSIP1    | -4.036±0.267 | -4.413±0.483 | 7.29E-06 |
| cg27387222 | 12 | 32831504  | DNM1L    | 3.067±0.226  | 2.505±0.771  | 7.29E-06 |
| cg19896198 | 1  | 12123262  | TNFRSF8  | -3.408±0.267 | -2.61±1.104  | 7.32E-06 |
| cg19776201 | 19 | 58951434  | ZNF132   | -4.218±0.442 | -3.29±1.259  | 7.37E-06 |
| cg26063872 | 20 | 30028206  | DEFB123  | 1.552±0.316  | 0.948±0.814  | 7.39E-06 |
| cg10694152 | 13 | 99404506  | SLC15A1  | -2.312±0.542 | -1.526±1.016 | 7.40E-06 |
| cg07549194 | 19 | 49927076  | PTH2     | -1.386±0.262 | -0.888±0.67  | 7.40E-06 |
| cg26806924 | 20 | 33760017  | PROCR    | -3.589±0.399 | -2.919±0.888 | 7.42E-06 |
| cg10315334 | 17 | 34207332  | CCL5     | 1.089±0.401  | 0.526±0.722  | 7.46E-06 |
| cg01820374 | 12 | 6882083   | LAG3     | 0.456±0.26   | 0.035±0.555  | 7.47E-06 |
| cg17253459 | 1  | 114522670 | OLFML3   | 0.984±0.23   | 1.45±0.631   | 7.47E-06 |
| cg23771603 | 10 | 26223310  | MYO3A    | -3.064±0.807 | -1.754±1.728 | 7.48E-06 |
| cg19250891 | 1  | 160121412 | ATP1A4   | 1.975±0.164  | 1.74±0.304   | 7.50E-06 |
| cg13619915 | 3  | 164914437 | SLITRK3  | -4.373±0.57  | -3.29±1.459  | 7.51E-06 |
| cg10376763 | 2  | 217724363 | TNP1     | 3.072±0.22   | 2.402±0.929  | 7.54E-06 |
| cg03495868 | 1  | 78956905  | PTGFR    | -3.535±0.416 | -2.83±0.937  | 7.55E-06 |
| cg08116137 | 2  | 73870653  | NAT8     | -1.964±0.347 | -1.402±0.742 | 7.57E-06 |
| cg19556572 | 9  | 117156701 | AKNA     | 1.678±0.267  | 1.977±0.355  | 7.57E-06 |
| cg05711886 | 14 | 101292680 | MEG3     | 0.49±0.101   | 0.763±0.377  | 7.60E-06 |
| cg10840135 | 22 | 42526619  | CYP2D6   | 1.93±0.321   | 1.549±0.465  | 7.61E-06 |
| cg15044041 | 3  | 113160313 | WDR52    | -0.136±0.251 | 0.392±0.719  | 7.62E-06 |
| cg07376029 | 4  | 72650992  | GC       | -0.123±0.23  | -0.628±0.691 | 7.64E-06 |
| cg16584573 | 10 | 103535637 | FGF8     | -4.789±0.911 | -3.51±1.642  | 7.65E-06 |
| cg06638433 | 17 | 47075175  | IGF2BP1  | -2.446±0.253 | -1.414±1.444 | 7.66E-06 |
| cg05449607 | 6  | 111279612 | GTF3C6   | -3.177±0.341 | -3.673±0.644 | 7.70E-06 |
| cg23472215 | 1  | 110282815 | GSTM3    | -5.586±1.049 | -4.243±1.684 | 7.73E-06 |
| cg22692158 | 12 | 11463844  | PRB4     | 2.808±0.183  | 2.532±0.36   | 7.79E-06 |
| cg11504739 | 11 | 62186060  | SCGB1A1  | 2.099±0.233  | 1.653±0.604  | 7.80E-06 |
| cg06653796 | 20 | 62367805  | LIME1    | 0.776±0.415  | 0.135±0.841  | 7.80E-06 |
| cg05564251 | 2  | 231090640 | SP140    | 1.752±0.49   | 1.106±0.817  | 7.81E-06 |
| cg17607231 | 2  | 231090329 | SP140    | 0.556±0.389  | -0.071±0.829 | 7.81E-06 |
| cg25712380 | 22 | 40297826  | GRAP2    | 1.664±0.341  | 1.084±0.774  | 7.86E-06 |
| cg02564733 | 11 | 130319074 | ADAMTS15 | -3.029±0.466 | -2.354±0.875 | 7.88E-06 |
| cg08107272 | 2  | 79739942  | CTNNA2   | -3.148±0.662 | -2.204±1.221 | 7.93E-06 |
| cg02664205 | 6  | 136171652 | PDE7B    | 2.858±0.216  | 2.456±0.542  | 7.93E-06 |
| cg21165219 | 18 | 10698044  | PIEZO2   | 1.762±0.469  | 1.088±0.853  | 7.96E-06 |
| cg10935709 | 9  | 179280    | CBWD1    | -5.002±0.311 | -5.31±0.341  | 7.98E-06 |
| cg14159672 | 1  | 205819179 | PM20D1   | -3.136±0.819 | -1.95±1.538  | 8.02E-06 |

|            |    |           |              |              |              |          |
|------------|----|-----------|--------------|--------------|--------------|----------|
| cg22724153 | 7  | 123565925 | SPAM1        | 1.298±0.292  | 0.716±0.791  | 8.02E-06 |
| cg14003512 | 2  | 88047546  | PLGLB2       | 0.458±0.155  | 0.018±0.611  | 8.02E-06 |
| cg13237829 | 19 | 14640386  | TECR         | -3.658±0.374 | -3.308±0.368 | 8.04E-06 |
| cg08074477 | 17 | 38657949  | TNS4         | 0.429±0.136  | 0.07±0.498   | 8.07E-06 |
| cg14533138 | 17 | 39525921  | KRT33B       | 1.845±0.258  | 1.251±0.818  | 8.07E-06 |
| cg08185661 | 11 | 7273498   | SYT9         | -1.86±0.72   | -0.765±1.436 | 8.07E-06 |
| cg07236190 | 12 | 96338038  | AMDHD1       | 1.415±0.44   | 0.819±0.762  | 8.07E-06 |
| cg13311440 | 1  | 160681404 | CD48         | 0.323±0.346  | -0.421±1.018 | 8.09E-06 |
| cg02490034 | 7  | 130125836 | MEST         | -0.014±0.24  | -0.541±0.723 | 8.09E-06 |
| cg25882056 | 22 | 50311056  | ALG12        | 2.156±0.279  | 1.859±0.345  | 8.12E-06 |
| cg14759043 | 12 | 3862597   | EFCAB4B      | -1.589±0.323 | -2.436±1.173 | 8.12E-06 |
| cg23881725 | 3  | 38080642  | DLEC1        | -3.812±0.342 | -2.57±1.739  | 8.14E-06 |
| cg25778166 | 1  | 171059935 | FMO3         | 2.31±0.257   | 1.662±0.897  | 8.20E-06 |
| cg03794550 | 11 | 22646597  | FANCF        | -4.81±0.392  | -5.241±0.51  | 8.20E-06 |
| cg04008455 | 15 | 75661449  | MAN2C1       | -1.293±0.224 | -1.751±0.624 | 8.21E-06 |
| cg19642007 | 11 | 1944464   | TNNT3        | 2.036±0.362  | 1.426±0.815  | 8.22E-06 |
| cg05522383 | 4  | 111557894 | PITX2        | -2.478±0.257 | -1.518±1.346 | 8.22E-06 |
| cg03548857 | 19 | 35940174  | FFAR2        | -0.759±0.402 | -1.408±0.861 | 8.24E-06 |
| cg03684977 | 17 | 37893803  | GRB7         | 0.86±0.274   | 0.085±1.077  | 8.25E-06 |
| cg12340144 | 3  | 38388808  | XYLB         | -1.7±0.302   | -2.21±0.681  | 8.27E-06 |
| cg05861567 | 22 | 50523686  | MLC1         | -1.255±0.397 | -1.849±0.777 | 8.27E-06 |
| cg13315690 | 17 | 1944831   | OVCA2        | -2.438±0.426 | -1.866±0.73  | 8.29E-06 |
| cg05475277 | 22 | 36902578  | FOXRED2      | 4.414±0.313  | 3.695±0.988  | 8.29E-06 |
| cg09548084 | 6  | 8436218   | LOC100506207 | 0.771±0.413  | 0.064±0.947  | 8.31E-06 |
| cg09261262 | 10 | 88414554  | OPN4         | 2.046±0.394  | 1.447±0.788  | 8.36E-06 |
| cg21274570 | 19 | 8117671   | CCL25        | 0.944±0.258  | 1.404±0.62   | 8.37E-06 |
| cg25468723 | 22 | 26566058  | SEZ6L        | -4.987±0.446 | -4.082±1.235 | 8.37E-06 |
| cg05965402 | 4  | 25235416  | PI4K2B       | -3.693±0.289 | -3.961±0.278 | 8.39E-06 |
| cg26624134 | 11 | 128761419 | KCNJ5        | -2.731±0.331 | -2.086±0.877 | 8.43E-06 |
| cg15584813 | 12 | 47219626  | SLC38A4      | -2.057±0.626 | -1.239±1.039 | 8.44E-06 |
| cg08223235 | 18 | 60903834  | BCL2         | 1.738±0.319  | 1.215±0.696  | 8.48E-06 |
| cg15034135 | 5  | 128796168 | ADAMTS19     | -5.185±0.548 | -4.125±1.441 | 8.48E-06 |
| cg22375192 | 15 | 99193466  | IGF1R        | -3.514±1.109 | -2.369±1.308 | 8.52E-06 |
| cg02416716 | 11 | 6948024   | ZNF215       | -5.577±0.375 | -4.233±1.887 | 8.55E-06 |
| cg13391638 | 7  | 112430772 | TMEM168      | -3.025±0.339 | -3.479±0.581 | 8.55E-06 |
| cg05569220 | 17 | 79138873  | AATK-AS1     | 0.632±0.244  | 0.204±0.575  | 8.56E-06 |
| cg18678185 | 19 | 48895030  | KDELR1       | -3.018±0.295 | -3.431±0.535 | 8.59E-06 |
| cg03870261 | 19 | 2428514   | TMM13        | -0.038±0.379 | 0.657±0.94   | 8.59E-06 |
| cg12081743 | 7  | 18535499  | HDAC9        | -2.918±0.329 | -1.957±1.341 | 8.61E-06 |
| cg07955887 | 18 | 8717926   | SOGA2        | 2.716±0.237  | 2.112±0.839  | 8.67E-06 |
| cg16507522 | 14 | 95077557  | SERPINA3     | 1.627±0.291  | 1.217±0.53   | 8.70E-06 |
| cg00625653 | 3  | 13921227  | WNT7A        | -3.665±0.727 | -2.579±1.427 | 8.71E-06 |
| cg11564670 | 18 | 13915006  | MC2R         | 2.646±0.264  | 2.064±0.8    | 8.71E-06 |
| cg20699736 | 2  | 71127226  | VAX2         | -4.099±0.463 | -3.321±1.042 | 8.71E-06 |
| cg16175725 | 12 | 121416796 | HNF1A        | 3.121±0.293  | 2.082±1.46   | 8.72E-06 |
| cg00022866 | 11 | 64108440  | CCDC88B      | 0.302±0.158  | 0.756±0.635  | 8.73E-06 |
| cg10345936 | 5  | 150727812 | SLC36A2      | 0.635±0.254  | 0.057±0.798  | 8.76E-06 |
| cg15915418 | 9  | 84303601  | TLE1         | -1.913±1.394 | -0.758±1.019 | 8.77E-06 |
| cg08124722 | 17 | 32597714  | CCL7         | 2.95±0.168   | 2.383±0.796  | 8.77E-06 |
| cg20131596 | 5  | 102201128 | PAM          | -0.846±0.289 | -0.387±0.611 | 8.77E-06 |
| cg14256699 | 17 | 41836026  | SOST         | 3.689±0.363  | 2.898±1.088  | 8.83E-06 |
| cg09874752 | 10 | 99531309  | SFRP5        | -4.537±0.576 | -3.637±1.193 | 8.84E-06 |
| cg02196805 | 5  | 131409637 | CSF2         | 0.137±0.224  | -0.378±0.712 | 8.84E-06 |
| cg21474838 | 12 | 10460612  | KLRD1        | 1.548±0.211  | 1.168±0.515  | 8.85E-06 |
| cg02058918 | 9  | 101470884 | GABBR2       | -3.438±0.656 | -2.573±1.104 | 8.86E-06 |
| cg10795646 | 1  | 151975566 | 0            | 0.074±0.343  | -0.509±0.784 | 8.92E-06 |
| cg00756887 | 1  | 161059654 | PVRL4        | 1.012±0.295  | 0.469±0.737  | 8.93E-06 |
| cg08878323 | 7  | 96652464  | DLX5         | -2.257±0.325 | -1.77±0.641  | 8.93E-06 |
| cg17503456 | 3  | 138666054 | C3orf72      | -3.781±0.466 | -2.868±1.245 | 8.94E-06 |
| cg04686412 | 5  | 139175658 | PSD2         | -2.669±0.421 | -2.126±0.69  | 8.95E-06 |
| cg22182975 | 6  | 167571172 | GPR31        | 2.916±0.286  | 2.434±0.647  | 8.96E-06 |
| cg17778867 | 21 | 46032026  | KRTAP10-8    | 2.371±0.288  | 1.67±0.973   | 8.98E-06 |
| cg19014419 | 5  | 150284504 | ZNF300       | -1.708±0.337 | -1.147±0.753 | 9.02E-06 |
| cg20227165 | 11 | 45115819  | PRDM11       | 0.758±0.173  | 0.258±0.701  | 9.05E-06 |
| cg01512854 | 5  | 140480967 | PCDHB3       | -0.557±0.54  | 0.031±0.698  | 9.08E-06 |
| cg13140267 | 2  | 96971704  | SNRNP200     | -3.354±0.408 | -4.08±0.982  | 9.10E-06 |
| cg12125117 | 16 | 57701461  | GPR97        | 0.812±0.346  | 0.122±0.945  | 9.13E-06 |

|            |    |           |            |              |              |          |
|------------|----|-----------|------------|--------------|--------------|----------|
| cg10063179 | 4  | 187476326 | MTNR1A     | -2.849±0.501 | -2.254±0.735 | 9.17E-06 |
| cg19235307 | 3  | 129160154 | MBD4       | -2.638±0.306 | -2.072±0.77  | 9.22E-06 |
| cg04167867 | 3  | 108837130 | MORC1      | 3.17±0.298   | 2.663±0.682  | 9.23E-06 |
| cg15516226 | 5  | 180467519 | BTNL9      | 2.493±0.779  | 3.187±0.696  | 9.23E-06 |
| cg23173455 | 22 | 22988684  | GGTLC2     | 0.699±0.213  | 0.331±0.496  | 9.25E-06 |
| cg08489623 | 7  | 55902220  | 42627      | 0.553±0.3    | 0.091±0.605  | 9.34E-06 |
| cg10709021 | 8  | 30890108  | PURG       | -1.624±0.311 | -0.988±0.874 | 9.36E-06 |
| cg27501458 | 22 | 44258690  | SULT4A1    | -2.847±0.469 | -2.143±0.93  | 9.38E-06 |
| cg11631518 | 12 | 75603585  | KCNC2      | -3.282±0.357 | -2.503±1.075 | 9.38E-06 |
| cg02620769 | 12 | 49298070  | CCDC65     | -4.055±0.397 | -2.547±2.13  | 9.39E-06 |
| cg25713185 | 2  | 228582486 | SLC19A3    | -2.678±0.354 | -2.174±0.658 | 9.40E-06 |
| cg04439215 | 13 | 45768901  | KCTD4      | 0.803±0.313  | 1.34±0.724   | 9.40E-06 |
| cg14719352 | 19 | 49258131  | FUT1       | 1.012±0.203  | 0.628±0.525  | 9.46E-06 |
| cg24105933 | 4  | 8270795   | HTRA3      | 3.727±0.218  | 3.433±0.379  | 9.47E-06 |
| cg23851011 | 1  | 153585915 | S100A16    | 0.826±0.316  | 0.096±1.014  | 9.50E-06 |
| cg07011110 | 6  | 26500482  | BTN1A1     | 2.151±0.164  | 1.671±0.674  | 9.51E-06 |
| cg14617642 | 10 | 71812630  | H2AFY2     | -5.085±0.648 | -4.113±1.285 | 9.53E-06 |
| cg18118795 | 1  | 33117735  | RBBP4      | 0.163±0.388  | -0.255±0.485 | 9.55E-06 |
| cg10062803 | 8  | 82396644  | FABP4      | 1.617±0.281  | 1.08±0.734   | 9.56E-06 |
| cg15329642 | 1  | 45308298  | PTCH2      | 1.015±0.229  | 0.455±0.781  | 9.56E-06 |
| cg20881888 | 3  | 50383079  | ZMYND10    | -0.392±0.586 | -1.424±1.399 | 9.58E-06 |
| cg12532477 | 16 | 75529504  | CHST6      | 0.077±0.217  | -0.357±0.596 | 9.58E-06 |
| cg05365670 | 5  | 1524551   | LPCAT1     | 0.354±0.307  | -0.223±0.788 | 9.59E-06 |
| cg02202484 | 1  | 152942688 | SPRR4      | 1.451±0.284  | 0.815±0.882  | 9.59E-06 |
| cg04968426 | 15 | 41120711  | PPP1R14D   | 2.944±0.243  | 2.162±1.102  | 9.60E-06 |
| cg06643227 | 9  | 114557239 | 0          | 2.381±0.282  | 1.854±0.719  | 9.61E-06 |
| cg06397837 | 7  | 27240251  | HOTTIP     | -4.371±0.392 | -3.061±1.848 | 9.65E-06 |
| cg08221207 | 11 | 125366421 | FEZ1       | -3.645±0.351 | -2.951±0.953 | 9.67E-06 |
| cg10801369 | 17 | 33417179  | RFFL       | 1.067±0.489  | 0.301±1.021  | 9.68E-06 |
| cg25463409 | 4  | 46848264  | COX7B2     | 1.189±0.276  | 0.573±0.854  | 9.68E-06 |
| cg11845202 | 12 | 53242392  | KRT78      | 2.757±0.197  | 2.525±0.286  | 9.68E-06 |
| cg15422784 | 1  | 90023713  | LRRC8B     | 2.872±0.17   | 2.7±0.195    | 9.68E-06 |
| cg00090147 | 8  | 11562367  | GATA4      | -2.395±0.322 | -1.636±1.057 | 9.71E-06 |
| cg09902130 | 11 | 60739178  | CD6        | 1.649±0.422  | 0.944±0.95   | 9.74E-06 |
| cg06821120 | 3  | 50375459  | RASSF1     | -0.725±0.311 | -1.446±1.001 | 9.74E-06 |
| cg03221914 | 6  | 27783331  | HIST1H2AJ  | -0.291±0.206 | 0.324±0.866  | 9.74E-06 |
| cg10171125 | 8  | 27850315  | SCARA5     | -3.573±0.436 | -2.818±1.022 | 9.76E-06 |
| cg11337780 | 19 | 11977718  | ZNF439     | 1.698±0.33   | 1.259±0.565  | 9.81E-06 |
| cg07546360 | 22 | 46482023  | MIRLET7BHG | -0.716±0.31  | -0.042±0.934 | 9.88E-06 |
| cg20166532 | 1  | 101702782 | S1PR1      | -3.965±0.228 | -2.927±1.476 | 9.94E-06 |
| cg14114267 | 2  | 174831503 | SP3        | 0.494±0.273  | -0.085±0.801 | 9.97E-06 |
| cg24056567 | 8  | 18871909  | PSD3       | -1.379±0.211 | -1.812±0.598 | 1.00E-05 |
| cg18630040 | 6  | 46702983  | PLA2G7     | -3.957±0.909 | -2.571±1.842 | 1.00E-05 |
| cg16377880 | 19 | 15751167  | CYP4F3     | 0.574±0.27   | 0.165±0.544  | 1.00E-05 |
| cg08446111 | 16 | 48279428  | LONP2      | -0.51±0.343  | 0.105±0.838  | 1.00E-05 |
| cg14401837 | 7  | 34697493  | NPSR1      | 1.429±0.208  | 0.752±0.956  | 1.00E-05 |
| cg17676129 | 10 | 135382545 | SYCE1      | 0.452±0.189  | 0.722±0.355  | 1.01E-05 |
| cg23398173 | 7  | 135662345 | MTPN       | -2.314±0.386 | -2.695±0.427 | 1.01E-05 |
| cg10377274 | 11 | 125616888 | PATE1      | 2.157±0.227  | 1.584±0.802  | 1.01E-05 |
| cg16778809 | 2  | 207308375 | ADAM23     | -4.227±0.416 | -2.875±1.913 | 1.02E-05 |
| cg02229946 | 2  | 113669912 | IL37       | 1.794±0.302  | 1.243±0.753  | 1.02E-05 |
| cg17127823 | 8  | 71520941  | LOC286190  | -1.333±0.318 | -1.812±0.635 | 1.03E-05 |
| cg10447080 | 6  | 76203225  | FILIP1     | -2.118±0.437 | -1.499±0.812 | 1.03E-05 |
| cg05346140 | 17 | 40275057  | HSPB9      | 2.704±0.271  | 1.863±1.189  | 1.03E-05 |
| cg05714479 | 13 | 21634945  | LATS2      | -5.152±0.986 | -4.059±1.322 | 1.03E-05 |
| cg27584171 | 15 | 49338887  | SECISBP2L  | -4.763±0.558 | -5.299±0.589 | 1.04E-05 |
| cg03886110 | 0  | 0         | 0          | 0.428±0.252  | 0.943±0.712  | 1.04E-05 |
| cg01795161 | 7  | 87506981  | SLC25A40   | -1.098±0.322 | -1.614±0.693 | 1.04E-05 |
| cg24197445 | 3  | 167045873 | ZBBX       | 2.26±0.235   | 1.579±0.961  | 1.04E-05 |
| cg07330329 | 11 | 55028768  | TRIM48     | -1.51±0.279  | -1.949±0.588 | 1.04E-05 |
| cg18995088 | 5  | 134914734 | CXCL14     | -4.768±0.849 | -3.822±1.147 | 1.04E-05 |
| cg10834677 | 1  | 113263289 | FAM19A3    | 1.581±0.18   | 1.206±0.519  | 1.04E-05 |
| cg16357921 | 9  | 90589634  | CDK20      | -4.256±1.041 | -3.117±1.369 | 1.05E-05 |
| cg13615963 | 6  | 167536521 | CCR6       | -0.672±0.236 | -1.286±0.862 | 1.06E-05 |
| cg12619509 | 16 | 2286601   | DNASE1L2   | -0.447±0.366 | 0.093±0.716  | 1.06E-05 |
| cg00943245 | 5  | 140867386 | PCDHGC5    | 1.702±0.204  | 1.311±0.539  | 1.06E-05 |
| cg22325572 | 1  | 111416181 | CD53       | 0.144±0.418  | -0.577±0.982 | 1.07E-05 |

|            |    |           |              |              |              |          |
|------------|----|-----------|--------------|--------------|--------------|----------|
| cg16427670 | 13 | 111766902 | ARHGEF7      | -3.686±0.343 | -3.143±0.73  | 1.07E-05 |
| cg15518883 | 9  | 35650561  | SIT1         | 1.856±0.4    | 1.323±0.691  | 1.07E-05 |
| cg06264060 | 22 | 41075007  | MCHR1        | 1.371±0.269  | 1.841±0.64   | 1.08E-05 |
| cg02855426 | 7  | 129984350 | CPA5         | 0.211±0.361  | -0.203±0.51  | 1.08E-05 |
| cg04759439 | 3  | 56502612  | ERC2         | -1.936±0.728 | -1.078±1.069 | 1.08E-05 |
| cg02870945 | 2  | 86565124  | REEP1        | -2.119±0.349 | -2.683±0.759 | 1.08E-05 |
| cg07422345 | 19 | 33793987  | CEBPA-AS1    | -4.203±0.662 | -3.483±0.865 | 1.08E-05 |
| cg20022541 | 14 | 94385395  | FAM181A      | 2.596±0.362  | 1.97±0.852   | 1.08E-05 |
| cg13306164 | 1  | 33352184  | HPCA         | -4.973±0.652 | -4.061±1.197 | 1.08E-05 |
| cg07347645 | 20 | 58507171  | SYCP2        | 2.784±0.224  | 2.417±0.497  | 1.09E-05 |
| cg25545210 | 17 | 39538417  | KRT34        | 1.895±0.238  | 1.302±0.832  | 1.09E-05 |
| cg19823847 | 6  | 138539706 | PBOV1        | 1.34±0.341   | 0.866±0.622  | 1.10E-05 |
| cg18860847 | 15 | 72103457  | NR2E3        | 1.894±0.179  | 1.487±0.568  | 1.10E-05 |
| cg00135056 | 3  | 128997295 | C3orf37      | -3.07±0.386  | -2.611±0.575 | 1.11E-05 |
| cg14061619 | 2  | 235860118 | SH3BP4       | -4.172±0.458 | -3.501±0.891 | 1.11E-05 |
| cg20585500 | 11 | 64703192  | GPHA2        | 1.906±0.225  | 2.174±0.336  | 1.11E-05 |
| cg23983449 | 17 | 7146757   | GABARAP      | -1.281±0.316 | -0.796±0.649 | 1.12E-05 |
| cg00573606 | 2  | 238322680 | COL6A3       | 0.286±0.271  | 0.819±0.737  | 1.12E-05 |
| cg25366404 | 6  | 39895360  | MOCS1        | 0.61±0.174   | 0.206±0.566  | 1.12E-05 |
| cg19781133 | 7  | 150674980 | KCNH2        | -3.183±0.808 | -2.187±1.267 | 1.13E-05 |
| cg00554682 | 2  | 185463132 | ZNF804A      | -3.922±0.3   | -3.158±1.075 | 1.13E-05 |
| cg16749930 | 11 | 71709978  | IL18BP       | -1.144±0.254 | -0.668±0.656 | 1.13E-05 |
| cg04595372 | 6  | 49681233  | CRISP2       | 0.165±0.262  | 0.661±0.686  | 1.13E-05 |
| cg24365013 | 3  | 150691910 | CLRN1        | 2.011±0.229  | 1.561±0.622  | 1.13E-05 |
| cg04969878 | 12 | 72079240  | TMEM19       | 0.065±0.275  | -0.502±0.787 | 1.13E-05 |
| cg07881407 | 17 | 34313744  | CCL14        | 0.114±0.201  | 0.491±0.52   | 1.14E-05 |
| cg06872331 | 2  | 119981960 | STEAP3       | -3.461±0.319 | -3.815±0.432 | 1.14E-05 |
| cg07732037 | 12 | 123707827 | MPHOSPH9     | 1.352±0.398  | 0.81±0.709   | 1.14E-05 |
| cg06546607 | 19 | 34013019  | PEPD         | -3.833±0.457 | -3.034±1.094 | 1.14E-05 |
| cg20786074 | 2  | 56150255  | EFEMP1       | -2.242±0.283 | -1.471±1.091 | 1.14E-05 |
| cg15677294 | 19 | 6502938   | TUBB4A       | 1.219±0.224  | 0.794±0.586  | 1.15E-05 |
| cg09936762 | 10 | 80959688  | ZMIZ1        | 2.143±0.309  | 1.731±0.536  | 1.16E-05 |
| cg12891678 | 1  | 153015281 | 0            | 0.373±0.184  | -0.136±0.721 | 1.16E-05 |
| cg11527279 | 9  | 124854846 | TTL11        | -3.203±0.374 | -2.555±0.885 | 1.16E-05 |
| cg27096144 | 5  | 174151779 | MSX2         | -2.14±0.767  | -1.295±1.029 | 1.16E-05 |
| cg08578734 | 5  | 152870490 | GRIA1        | -2.374±0.395 | -1.446±1.304 | 1.16E-05 |
| cg09480837 | 10 | 95789501  | PLCE1        | 2.031±0.239  | 1.494±0.752  | 1.16E-05 |
| cg07639198 | 10 | 5004250   | AKR1C1       | 0.798±0.392  | 0.388±0.482  | 1.18E-05 |
| cg04237663 | 8  | 110987019 | KCNV1        | -3.893±0.371 | -2.945±1.34  | 1.18E-05 |
| cg27034836 | 3  | 33139098  | GLB1         | -2.266±0.42  | -2.695±0.502 | 1.18E-05 |
| cg19795898 | 9  | 139693196 | KIAA1984     | 0.668±0.19   | 0.208±0.648  | 1.18E-05 |
| cg03609102 | 11 | 1244533   | MUC5B        | 0.107±0.202  | -0.263±0.51  | 1.18E-05 |
| cg11147886 | 16 | 69598170  | 0            | 0.682±0.46   | -0.07±1.021  | 1.18E-05 |
| cg19257200 | 22 | 38380983  | SOX10        | 2.312±0.18   | 2.034±0.374  | 1.19E-05 |
| cg05621401 | 10 | 43572065  | RET          | -3.551±0.573 | -2.493±1.46  | 1.19E-05 |
| cg10846922 | 5  | 104435608 | RAB9BP1      | 1.968±0.267  | 1.56±0.548   | 1.19E-05 |
| cg11054936 | 13 | 20766170  | GJB2         | -0.956±0.213 | -1.401±0.622 | 1.20E-05 |
| cg12311132 | 11 | 32112154  | RCN1         | -1.969±0.333 | -1.421±0.747 | 1.20E-05 |
| cg26516759 | 20 | 55840973  | BMP7         | -3.902±0.567 | -2.885±1.4   | 1.20E-05 |
| cg23101680 | 13 | 46277286  | SPERT        | -0.65±0.276  | -1.07±0.564  | 1.21E-05 |
| cg25437385 | 1  | 234040833 | SLC35F3      | -2.929±0.701 | -1.96±1.278  | 1.21E-05 |
| cg05389183 | 5  | 122372942 | PPIC         | -3.245±0.418 | -2.8±0.534   | 1.21E-05 |
| cg25629118 | 6  | 146113270 | LOC100507557 | 1.931±0.301  | 1.639±0.329  | 1.21E-05 |
| cg02037013 | 18 | 58039530  | MC4R         | 0.5±0.294    | 0.983±0.658  | 1.22E-05 |
| cg17606785 | 14 | 23834808  | EFS          | -2.66±0.438  | -2.027±0.844 | 1.22E-05 |
| cg25823578 | 14 | 52781312  | PTGER2       | -4.437±0.366 | -3.401±1.474 | 1.22E-05 |
| cg05125838 | 3  | 48601585  | UCN2         | -0.004±0.215 | -0.447±0.618 | 1.22E-05 |
| cg22607339 | 1  | 43803159  | MPL          | 2.056±0.333  | 1.549±0.682  | 1.23E-05 |
| cg20200335 | 12 | 52967554  | KRT74        | 2.402±0.259  | 1.964±0.599  | 1.23E-05 |
| cg18719571 | 6  | 15664231  | DTNBP1       | 2.224±0.23   | 1.703±0.733  | 1.23E-05 |
| cg02124291 | 19 | 14939260  | OR7A5        | 1.54±0.28    | 1.114±0.574  | 1.23E-05 |
| cg26087862 | 1  | 150602029 | ENSA         | -0.388±0.166 | -0.644±0.345 | 1.23E-05 |
| cg19240938 | 11 | 2942036   | SLC22A18     | 2.962±0.31   | 2.637±0.387  | 1.24E-05 |
| cg17163751 | 10 | 71812596  | H2AFY2       | -5.35±0.629  | -4.455±1.191 | 1.24E-05 |
| cg19255783 | 4  | 84035953  | PLAC8        | -1.325±0.324 | -1.798±0.632 | 1.24E-05 |
| cg10161121 | 1  | 172628020 | FASLG        | 1.131±0.314  | 0.664±0.627  | 1.25E-05 |
| cg02218324 | 19 | 46318439  | RSPH6A       | 1.451±0.283  | 1.915±0.633  | 1.25E-05 |

|            |    |           |           |              |              |          |
|------------|----|-----------|-----------|--------------|--------------|----------|
| cg20661303 | 1  | 226129561 | LEFTY2    | -0.271±0.221 | 0.111±0.526  | 1.25E-05 |
| cg22262964 | 2  | 89629580  | 0         | -0.607±0.214 | -1.027±0.585 | 1.25E-05 |
| cg18676053 | 9  | 124133094 | STOM      | 1.764±0.293  | 1.346±0.557  | 1.25E-05 |
| cg20275133 | 1  | 1342361   | MRPL20    | -4.306±0.383 | -3.918±0.452 | 1.26E-05 |
| cg20249919 | 15 | 102029706 | PCSK6     | -1.938±1.303 | -0.668±1.443 | 1.27E-05 |
| cg02503850 | 10 | 72432552  | ADAMTS14  | -3.205±0.83  | -2.342±1.025 | 1.28E-05 |
| cg23886755 | 1  | 33841166  | PHC2      | 3.292±0.226  | 3.077±0.24   | 1.28E-05 |
| cg04348872 | 2  | 25141696  | ADCY3     | 2.792±0.187  | 3.21±0.589   | 1.28E-05 |
| cg24751129 | 6  | 42928920  | GNMT      | 1.343±0.265  | 0.715±0.888  | 1.28E-05 |
| cg23433607 | 20 | 5892338   | CHGB      | -4.542±0.494 | -5.177±0.825 | 1.28E-05 |
| cg26490372 | 8  | 125552608 | NDUFB9    | 0.424±0.297  | 0.933±0.7    | 1.28E-05 |
| cg16506346 | 17 | 3302176   | OR1E1     | 1.979±0.331  | 1.544±0.569  | 1.28E-05 |
| cg16501235 | 1  | 150245988 | C1orf54   | 0.174±0.194  | 0.578±0.567  | 1.28E-05 |
| cg14156381 | 19 | 8212675   | FBN3      | -0.53±0.195  | -0.869±0.468 | 1.28E-05 |
| cg12322132 | 11 | 2165656   | IGF2-AS   | -4.211±0.477 | -3.105±1.562 | 1.28E-05 |
| cg13351161 | 8  | 27490921  | SCARA3    | -1.512±0.332 | -0.959±0.757 | 1.29E-05 |
| cg17627559 | 11 | 2323896   | TSPAN32   | 0.107±0.294  | -0.497±0.846 | 1.29E-05 |
| cg18201198 | 6  | 6623578   | LY86-AS1  | 1.932±0.213  | 1.32±0.874   | 1.30E-05 |
| cg08145590 | 3  | 119422161 | MAATS1    | -2.214±0.41  | -2.927±0.982 | 1.30E-05 |
| cg23029519 | 9  | 21187344  | IFNA4     | 1.733±0.279  | 1.42±0.387   | 1.30E-05 |
| cg08097973 | 11 | 71793051  | NUMA1     | 1.318±0.233  | 0.703±0.875  | 1.30E-05 |
| cg18047970 | 3  | 30893036  | GADL1     | 2.854±0.222  | 2.556±0.391  | 1.30E-05 |
| cg09953122 | 20 | 23471693  | CST8      | 3.298±0.259  | 2.913±0.518  | 1.30E-05 |
| cg12062492 | 14 | 24423140  | DHRS4     | -1.996±0.281 | -2.378±0.505 | 1.31E-05 |
| cg25461905 | 1  | 178481807 | TEX35     | 3.83±0.343   | 3.493±0.385  | 1.31E-05 |
| cg21859434 | 2  | 136876021 | CXCR4     | -5.965±0.517 | -4.51±2.078  | 1.32E-05 |
| cg15134649 | 16 | 56659336  | MT1E      | -5.017±0.535 | -3.765±1.772 | 1.32E-05 |
| cg23641145 | 11 | 101000566 | PGR       | -3.482±0.344 | -2.855±0.871 | 1.32E-05 |
| cg26124016 | 3  | 25469402  | RARB      | -3.29±0.465  | -2.65±0.848  | 1.32E-05 |
| cg19510604 | 15 | 74901076  | CLK3      | 2.259±0.169  | 1.926±0.466  | 1.33E-05 |
| cg04532952 | 17 | 58227745  | CA4       | -2.957±0.485 | -2.112±1.166 | 1.33E-05 |
| cg15046675 | 19 | 49838777  | CD37      | 0.794±0.473  | 0.095±0.941  | 1.34E-05 |
| cg06341721 | 19 | 1406759   | DAZAP1    | -3.347±0.296 | -3.634±0.327 | 1.34E-05 |
| cg24237576 | 16 | 2285775   | DNASE1L2  | 1.904±0.36   | 1.413±0.649  | 1.34E-05 |
| cg16293105 | 19 | 52034970  | SIGLEC6   | -1.976±0.616 | -2.72±0.951  | 1.35E-05 |
| cg17980508 | 1  | 79085713  | IFI44L    | -2.668±0.475 | -2.126±0.677 | 1.36E-05 |
| cg23352695 | 17 | 29648811  | EVI2A     | 0.217±0.387  | -0.51±1.013  | 1.37E-05 |
| cg00213044 | 12 | 52886438  | KRT6A     | 1.391±0.218  | 1.049±0.466  | 1.37E-05 |
| cg12939547 | 6  | 31744037  | VWA7      | 2.655±0.398  | 1.884±1.078  | 1.37E-05 |
| cg13765785 | 11 | 123524938 | SCN3B     | -2.404±0.236 | -1.764±0.915 | 1.37E-05 |
| cg18440048 | 22 | 24093826  | ZNF70     | -2.321±0.371 | -2.858±0.722 | 1.38E-05 |
| cg06154597 | 4  | 924812    | GAK       | 0.508±0.206  | 0.045±0.656  | 1.39E-05 |
| cg24834740 | 20 | 37434552  | PPP1R16B  | -5.014±0.423 | -3.913±1.572 | 1.39E-05 |
| cg04349727 | 19 | 51457389  | KLK5      | 0.715±0.281  | 0.154±0.786  | 1.39E-05 |
| cg24331079 | 2  | 192016205 | STAT4     | 3.587±0.181  | 2.932±0.945  | 1.39E-05 |
| cg02813121 | 1  | 153348911 | S100A12   | 2.23±0.258   | 1.758±0.657  | 1.39E-05 |
| cg14789259 | 2  | 14773457  | FAM84A    | -1.93±0.399  | -1.38±0.733  | 1.39E-05 |
| cg26149550 | 19 | 51334496  | KLK15     | 1.486±0.284  | 0.979±0.704  | 1.40E-05 |
| cg09671611 | 16 | 57577474  | GPR114    | 1.279±0.218  | 0.96±0.43    | 1.40E-05 |
| cg01720520 | 19 | 55127892  | LILRB1    | -0.44±0.224  | -0.902±0.65  | 1.40E-05 |
| cg08136806 | 12 | 52867793  | KRT6C     | 0.104±0.233  | -0.389±0.695 | 1.40E-05 |
| cg19279346 | 19 | 54785518  | MIR4752   | 1.237±0.246  | 0.698±0.762  | 1.40E-05 |
| cg21152662 | 4  | 48231543  | TEC       | 1.453±0.227  | 1.225±0.267  | 1.41E-05 |
| cg20895028 | 20 | 58533443  | CDH26     | 1.801±0.351  | 1.284±0.698  | 1.41E-05 |
| cg00839584 | 2  | 113542091 | IL1A      | -0.159±0.312 | -0.767±0.853 | 1.42E-05 |
| cg02938601 | 8  | 22961088  | TNFRSF10C | -2.733±0.368 | -3.393±0.918 | 1.43E-05 |
| cg25766774 | 3  | 45018909  | EXOSC7    | -0.303±0.316 | 0.399±0.995  | 1.43E-05 |
| cg14483391 | 3  | 183749227 | HTR3D     | 0.867±0.245  | 0.283±0.831  | 1.43E-05 |
| cg26750319 | 11 | 2593960   | KCNQ1     | 5.051±0.367  | 4.289±1.075  | 1.44E-05 |
| cg12385643 | 2  | 234600149 | UGT1A6    | 2.247±0.388  | 1.631±0.844  | 1.44E-05 |
| cg19403023 | 16 | 2848797   | PRSS41    | 0.666±0.61   | 1.281±0.724  | 1.44E-05 |
| cg14893161 | 1  | 205819251 | PM20D1    | -2.176±0.706 | -1.268±1.189 | 1.45E-05 |
| cg00615377 | 22 | 36236649  | RBFOX2    | -3.182±0.48  | -2.559±0.818 | 1.46E-05 |
| cg22879515 | 11 | 111383515 | MIR34B    | -3.873±0.583 | -2.907±1.331 | 1.46E-05 |
| cg03717979 | 4  | 4862184   | MSX1      | -4.629±0.413 | -3.451±1.693 | 1.46E-05 |
| cg20582779 | 1  | 222721375 | HHIPL2    | -0.043±0.23  | -0.512±0.662 | 1.46E-05 |
| cg04201526 | 6  | 49833706  | CRISP1    | 2.791±0.294  | 2.321±0.645  | 1.46E-05 |

|            |    |           |          |              |              |          |
|------------|----|-----------|----------|--------------|--------------|----------|
| cg14913925 | 7  | 99149239  | FAM200A  | -3.463±0.369 | -2.804±0.917 | 1.46E-05 |
| cg11091262 | 7  | 151653454 | GALNTL5  | 0.952±0.22   | 0.41±0.775   | 1.47E-05 |
| cg26299767 | 20 | 30062987  | REM1     | -3.347±0.325 | -2.655±0.979 | 1.48E-05 |
| cg08104838 | 5  | 217068    | CCDC127  | 2.184±0.207  | 2.406±0.271  | 1.48E-05 |
| cg10081899 | 22 | 22307482  | PPM1F    | -4.644±0.395 | -5.092±0.562 | 1.48E-05 |
| cg09076123 | 1  | 183559527 | NCF2     | 0.098±0.392  | -0.516±0.84  | 1.48E-05 |
| cg05559445 | 11 | 2907674   | CDKN1C   | -1.166±0.311 | -0.689±0.651 | 1.48E-05 |
| cg11075745 | 1  | 43205976  | CLDN19   | 0.468±0.208  | 0.848±0.53   | 1.48E-05 |
| cg05444024 | 19 | 5841072   | FUT6     | 2.669±0.315  | 2.383±0.31   | 1.49E-05 |
| cg00823148 | 2  | 209012295 | CRYGB    | 1.446±0.282  | 1.018±0.583  | 1.49E-05 |
| cg27049761 | 12 | 122688708 | B3GNT4   | -4.251±0.634 | -3.05±1.685  | 1.49E-05 |
| cg18242139 | 1  | 50574837  | ELAVL4   | 2.454±0.268  | 1.978±0.665  | 1.49E-05 |
| cg04797323 | 12 | 93966978  | SOCS2    | -2.329±0.607 | -1.05±1.811  | 1.49E-05 |
| cg11809085 | 9  | 117567756 | TNFSF15  | 0.531±0.249  | 0.032±0.702  | 1.49E-05 |
| cg04970352 | 11 | 44327399  | ALX4     | -2.958±0.556 | -1.917±1.459 | 1.50E-05 |
| cg17939444 | 8  | 40010443  | C8orf4   | -0.7±0.318   | -0.157±0.754 | 1.50E-05 |
| cg14260458 | 7  | 97620123  | OCM2     | 0.893±0.267  | 0.539±0.47   | 1.50E-05 |
| cg05016508 | 11 | 63871570  | FLRT1    | 5.237±0.519  | 4.724±0.598  | 1.50E-05 |
| cg25464840 | 10 | 14372910  | FRMD4A   | 0.094±0.237  | 0.5±0.564    | 1.50E-05 |
| cg05921324 | 11 | 116694114 | APOA4    | 0.751±0.24   | 0.351±0.554  | 1.50E-05 |
| cg11243196 | 4  | 73434856  | ADAMTS3  | -4.602±0.428 | -4±0.809     | 1.52E-05 |
| cg06130787 | 19 | 51523550  | KLK10    | -2.388±0.377 | -2.864±0.623 | 1.53E-05 |
| cg17696091 | 1  | 115396629 | SYCP1    | 2.156±0.2    | 1.712±0.633  | 1.53E-05 |
| cg23861715 | 9  | 99382235  | CDC14B   | -2.735±0.29  | -3.098±0.475 | 1.53E-05 |
| cg24353217 | 12 | 111358188 | MYL2     | 2.179±0.309  | 2.594±0.551  | 1.53E-05 |
| cg09871043 | 6  | 51952361  | PKHD1    | -0.08±0.217  | -0.548±0.666 | 1.54E-05 |
| cg00020533 | 6  | 35480916  | TULP1    | 2.602±0.312  | 2.238±0.465  | 1.54E-05 |
| cg21750887 | 8  | 68658237  | CPA6     | 1.033±0.184  | 0.452±0.841  | 1.54E-05 |
| cg27651218 | 14 | 93813520  | COX8C    | 4.476±0.487  | 3.826±0.863  | 1.54E-05 |
| cg16512727 | 12 | 4649136   | RAD51AP1 | -0.481±0.237 | -0.074±0.566 | 1.54E-05 |
| cg10995925 | 6  | 31539601  | LTA      | 0.506±0.29   | 0.031±0.657  | 1.55E-05 |
| cg15690721 | 19 | 21106016  | ZNF85    | -4.31±0.487  | -3.756±0.7   | 1.55E-05 |
| cg01791232 | 22 | 29469490  | KREMEN1  | -2.611±0.403 | -2.195±0.5   | 1.55E-05 |
| cg25136926 | 12 | 9602219   | DDX12P   | 1.289±0.293  | 0.979±0.377  | 1.56E-05 |
| cg16713808 | 1  | 152388040 | CRNN     | 1.818±0.242  | 1.192±0.9    | 1.57E-05 |
| cg21457147 | 13 | 45768695  | KCTD4    | 1.73±0.326   | 2.07±0.412   | 1.57E-05 |
| cg15144793 | 2  | 235861303 | SH3BP4   | -5.18±0.762  | -4.471±0.791 | 1.57E-05 |
| cg11752275 | 2  | 85921036  | GNLY     | 1.171±0.328  | 0.635±0.741  | 1.58E-05 |
| cg09425898 | 20 | 4721250   | PRNT     | 3.043±0.284  | 2.549±0.689  | 1.58E-05 |
| cg09841009 | 4  | 145061960 | GYPA     | 2.189±0.175  | 1.713±0.686  | 1.59E-05 |
| cg03192551 | 17 | 42403152  | SLC25A39 | -2.934±0.52  | -3.628±0.924 | 1.59E-05 |
| cg08521225 | 18 | 29171977  | TTR      | 2.285±0.204  | 1.744±0.779  | 1.59E-05 |
| cg26825412 | 20 | 62681428  | SOX18    | -0.351±0.159 | 0.114±0.673  | 1.60E-05 |
| cg21979032 | 3  | 42917517  | CYP8B1   | 2.296±0.327  | 1.856±0.587  | 1.60E-05 |
| cg21051086 | 3  | 73046214  | PPP4R2   | -1.423±0.25  | -1.2±0.239   | 1.60E-05 |
| cg26954174 | 16 | 50730813  | NOD2     | -0.913±0.338 | -1.708±1.139 | 1.60E-05 |
| cg19290962 | 20 | 2517613   | TMC2     | 0.612±0.253  | 0.127±0.685  | 1.60E-05 |
| cg09358725 | 11 | 33914088  | LMO2     | 1.647±0.352  | 0.976±0.947  | 1.61E-05 |
| cg13258700 | 7  | 156433997 | RNF32    | -2.593±0.268 | -3.185±0.845 | 1.61E-05 |
| cg01558777 | 10 | 85933798  | C10orf99 | 2.553±0.215  | 2.115±0.621  | 1.62E-05 |
| cg08001895 | 6  | 94129582  | EPHA7    | -4.622±0.479 | -3.459±1.671 | 1.65E-05 |
| cg13287780 | 21 | 40751665  | WRB      | 2.061±0.264  | 1.318±1.075  | 1.65E-05 |
| cg21435394 | 14 | 105648024 | NUDT14   | -2.288±0.253 | -2.652±0.495 | 1.65E-05 |
| cg02377083 | 3  | 42851019  | ACKR2    | 3.056±0.356  | 2.492±0.78   | 1.66E-05 |
| cg06456031 | 7  | 134832850 | TMEM140  | -4.205±0.409 | -4.59±0.436  | 1.66E-05 |
| cg20747455 | 20 | 43933383  | MATN4    | 2.335±0.442  | 2.772±0.514  | 1.67E-05 |
| cg14951292 | 16 | 4525986   | HMOX2    | 0.313±0.331  | -0.268±0.814 | 1.67E-05 |
| cg03309967 | 19 | 36235184  | U2AF1L4  | 0.805±0.279  | 0.34±0.647   | 1.67E-05 |
| cg15239123 | 14 | 70346413  | SMOC1    | -4.177±0.33  | -2.986±1.736 | 1.67E-05 |
| cg13064571 | 8  | 67587053  | C8orf44  | -0.061±0.342 | -0.629±0.773 | 1.69E-05 |
| cg05948654 | 6  | 25930507  | SLC17A2  | 1.168±0.281  | 0.751±0.562  | 1.69E-05 |
| cg20847746 | 1  | 153600865 | S100A1   | 1.214±0.185  | 0.748±0.672  | 1.69E-05 |
| cg13047892 | 7  | 15726649  | MEOX2    | -4.26±0.373  | -3.423±1.2   | 1.70E-05 |
| cg25165880 | 1  | 6454326   | ACOT7    | -2.488±0.32  | -2.909±0.56  | 1.72E-05 |
| cg17177699 | 19 | 10120594  | COL5A3   | -0.969±0.239 | -0.583±0.535 | 1.72E-05 |
| cg14324675 | 6  | 31554848  | LST1     | 1.039±0.348  | 0.474±0.785  | 1.72E-05 |
| cg03349935 | 15 | 65361335  | RASL12   | 1.829±0.226  | 2.146±0.429  | 1.72E-05 |

|            |    |           |             |              |              |          |
|------------|----|-----------|-------------|--------------|--------------|----------|
| cg07602200 | 12 | 121570875 | P2RX7       | -3.982±0.361 | -3.296±0.972 | 1.73E-05 |
| cg24778383 | 19 | 6590895   | CD70        | -5.454±0.434 | -4.553±1.286 | 1.74E-05 |
| cg07005513 | 11 | 61595956  | FADS2       | -2.888±0.323 | -2.311±0.812 | 1.75E-05 |
| cg22633722 | 21 | 44496743  | CBS         | -3.891±0.253 | -3.11±1.138  | 1.75E-05 |
| cg10371914 | 8  | 69350061  | C8orf34     | 1.188±0.295  | 0.694±0.681  | 1.76E-05 |
| cg19968631 | 4  | 175750792 | GLRA3       | -4.485±0.363 | -3.716±1.1   | 1.77E-05 |
| cg04443324 | 5  | 150948306 | FAT2        | 3.22±0.165   | 2.787±0.627  | 1.78E-05 |
| cg16785344 | 12 | 120703817 | PXN         | -4.165±0.345 | -3.842±0.366 | 1.78E-05 |
| cg01593385 | 4  | 155534149 | FGG         | 0.143±0.205  | -0.342±0.699 | 1.78E-05 |
| cg27351998 | 9  | 21304618  | IFNA5       | 2.517±0.286  | 2.092±0.584  | 1.79E-05 |
| cg19292712 | 7  | 123564194 | SPAM1       | 2.444±0.234  | 1.906±0.774  | 1.79E-05 |
| cg26646370 | 19 | 4279441   | SHD         | -2.87±0.485  | -1.999±1.229 | 1.79E-05 |
| cg01885635 | 3  | 40566085  | ZNF621      | -2.752±0.233 | -3.138±0.539 | 1.80E-05 |
| cg15691199 | 14 | 23589419  | CEBPE       | 0.765±0.424  | 0.104±0.914  | 1.80E-05 |
| cg06466797 | 7  | 35735019  | HERPUD2     | -4.492±0.342 | -4.804±0.348 | 1.82E-05 |
| cg18671950 | 15 | 48936953  | FBN1        | -4.167±0.584 | -2.865±1.873 | 1.83E-05 |
| cg05922591 | 19 | 55174624  | LILRB4      | 2.908±0.224  | 2.515±0.553  | 1.83E-05 |
| cg20029652 | 6  | 28249545  | PGBD1       | -4.471±0.354 | -3.432±1.513 | 1.83E-05 |
| cg13322449 | 19 | 42300200  | CEACAM3     | 0.9±0.307    | 1.265±0.474  | 1.84E-05 |
| cg26174752 | 6  | 97285948  | GPR63       | -2.527±0.36  | -1.906±0.873 | 1.84E-05 |
| cg05902852 | 7  | 79082393  | MAGI2-AS3   | -3.795±0.657 | -2.928±1.164 | 1.84E-05 |
| cg10878307 | 17 | 46034455  | PRR15L      | 0.669±0.222  | 0.105±0.818  | 1.84E-05 |
| cg22296149 | 19 | 2249330   | AMH         | 1.071±0.23   | 0.608±0.662  | 1.85E-05 |
| cg01804429 | 4  | 69216077  | YTHDC1      | -0.848±0.211 | -1.257±0.583 | 1.85E-05 |
| cg14201417 | 9  | 136400057 | ADAMTSL2    | -4.001±0.407 | -3.288±1.005 | 1.85E-05 |
| cg01459453 | 1  | 169599212 | SELP        | 0.784±0.308  | 1.322±0.758  | 1.85E-05 |
| cg01775414 | 22 | 45405404  | PHF21B      | -3.932±0.47  | -2.803±1.634 | 1.85E-05 |
| cg17480438 | 6  | 138528677 | KIAA1244    | 0.215±0.373  | -0.165±0.46  | 1.85E-05 |
| cg08047457 | 3  | 50378413  | RASSF1      | -4.317±1.1   | -2.512±2.523 | 1.85E-05 |
| cg23753610 | 17 | 76567830  | DNAH17      | 4.481±0.306  | 4.118±0.473  | 1.87E-05 |
| cg04968473 | 15 | 75040734  | CYP1A2      | 0.357±0.262  | -0.099±0.643 | 1.87E-05 |
| cg17194182 | 7  | 100318154 | EPO         | -4.323±0.519 | -3.371±1.35  | 1.87E-05 |
| cg23743114 | 17 | 34328396  | CCL15-CCL14 | 1.49±0.476   | 0.9±0.777    | 1.87E-05 |
| cg20781967 | 12 | 772688    | NINJ2       | 0.293±0.321  | -0.193±0.672 | 1.87E-05 |
| cg15544721 | 7  | 94536691  | PPP1R9A     | 1.234±0.275  | 0.624±0.879  | 1.88E-05 |
| cg13384498 | 2  | 209010629 | CRYGB       | 2.986±0.17   | 2.722±0.367  | 1.88E-05 |
| cg07753583 | 7  | 150020206 | LRRC61      | -2.453±0.41  | -2.985±0.712 | 1.89E-05 |
| cg15501381 | 14 | 77737800  | NGB         | -0.226±0.271 | 0.328±0.793  | 1.89E-05 |
| cg25753817 | 2  | 191208232 | INPP1       | -3.949±0.383 | -4.443±0.659 | 1.90E-05 |
| cg19070798 | 22 | 38240558  | MIR658      | -5.337±0.511 | -5.842±0.599 | 1.90E-05 |
| cg25990647 | 8  | 54164081  | OPRK1       | -3.724±0.673 | -2.755±1.328 | 1.91E-05 |
| cg24712395 | 19 | 39234666  | CAPN12      | 1.371±0.273  | 1.776±0.558  | 1.91E-05 |
| cg00260778 | 10 | 15140412  | C10orf111   | 0.199±0.39   | -0.261±0.597 | 1.91E-05 |
| cg09014354 | 12 | 55413878  | NEUROD4     | -3.299±0.349 | -2.568±1.049 | 1.91E-05 |
| cg10190509 | 17 | 34308137  | CCL16       | 1.941±0.318  | 1.39±0.778   | 1.91E-05 |
| cg20632573 | 11 | 20621341  | SLC6A5      | -3.81±0.421  | -3.046±1.084 | 1.92E-05 |
| cg21303011 | 3  | 24537177  | THRB        | -2.322±0.67  | -3.093±0.992 | 1.92E-05 |
| cg25332298 | 19 | 11592958  | ELAVL3      | -3.83±0.303  | -2.972±1.254 | 1.92E-05 |
| cg23534142 | 1  | 212739113 | ATF3        | 2.444±0.331  | 1.947±0.688  | 1.93E-05 |
| cg19229991 | 12 | 18242549  | RERGL       | 2.115±0.199  | 1.712±0.579  | 1.94E-05 |
| cg07366967 | 14 | 69675438  | EXD2        | 2.31±0.32    | 1.899±0.55   | 1.94E-05 |
| cg07595943 | 16 | 84224901  | ADAD2       | 4.139±0.436  | 3.328±1.155  | 1.94E-05 |
| cg24147596 | 3  | 160395420 | ARL14       | 1.171±0.212  | 0.548±0.911  | 1.94E-05 |
| cg19236727 | 5  | 178287717 | ZNF354B     | 0.174±0.15   | 0.328±0.188  | 1.95E-05 |
| cg00053647 | 7  | 6866072   | CCZ1B       | -3.476±0.312 | -3.759±0.314 | 1.95E-05 |
| cg20509080 | 3  | 56835873  | ARHGEF3     | -4.807±0.44  | -5.19±0.407  | 1.96E-05 |
| cg18053607 | 22 | 31518963  | INPP5J      | -1.473±0.419 | -0.899±0.779 | 1.96E-05 |
| cg05941634 | 2  | 97481230  | CNNM3       | -3.645±0.322 | -3.954±0.36  | 1.97E-05 |
| cg21902544 | 18 | 70211515  | CBLN2       | -3.279±0.411 | -2.378±1.302 | 1.97E-05 |
| cg16998872 | 4  | 144826832 | GYPE        | 2.096±0.168  | 1.628±0.683  | 1.97E-05 |
| cg09096383 | 4  | 70796842  | CSN1S1      | 1.622±0.334  | 1.121±0.694  | 1.98E-05 |
| cg20359349 | 17 | 41994531  | FAM215A     | 1.29±0.277   | 0.854±0.608  | 1.98E-05 |
| cg00443307 | 12 | 9141740   | KLRG1       | 0.696±0.356  | 0.14±0.775   | 1.98E-05 |
| cg14607011 | 10 | 135171746 | FUOM        | 1.889±0.396  | 2.449±0.766  | 1.98E-05 |
| cg03417466 | 11 | 88910418  | TYR         | 1.442±0.334  | 0.76±0.98    | 1.98E-05 |
| cg15201877 | 1  | 71512973  | PTGER3      | -1.877±0.353 | -1.212±0.948 | 1.99E-05 |
| cg24333473 | 16 | 3493428   | ZNF597      | -1.128±0.41  | -0.759±0.409 | 1.99E-05 |

|            |    |           |           |              |              |          |
|------------|----|-----------|-----------|--------------|--------------|----------|
| cg10467022 | 11 | 14994983  | CALCA     | -2.387±0.295 | -1.782±0.869 | 1.99E-05 |
| cg13781408 | 17 | 79095700  | AATK      | 1.759±0.338  | 2.35±0.837   | 2.00E-05 |
| cg03163246 | 4  | 74921023  | PPBPP2    | 2.513±0.287  | 2.186±0.42   | 2.00E-05 |
| cg11479877 | 21 | 41029500  | B3GALT5   | 1.678±0.292  | 1.213±0.65   | 2.01E-05 |
| cg08307092 | 6  | 26200174  | HIST1H2BF | -4.32±0.372  | -3.213±1.624 | 2.01E-05 |
| cg05836145 | 7  | 20827117  | SP8       | -0.332±0.146 | 0.051±0.559  | 2.01E-05 |
| cg06659073 | 6  | 158589307 | SERAC1    | -3.01±0.356  | -2.7±0.332   | 2.01E-05 |
| cg26264314 | 19 | 56510965  | NLRP5     | 1.649±0.862  | 0.826±0.954  | 2.01E-05 |
| cg06243556 | 19 | 58609473  | ZSCAN18   | -4.529±0.748 | -3.44±1.501  | 2.01E-05 |
| cg04958703 | 17 | 4844722   | RNF167    | -2.827±0.311 | -3.207±0.501 | 2.01E-05 |
| cg11265941 | 15 | 25068738  | SNRPN     | -0.875±0.261 | -0.455±0.589 | 2.01E-05 |
| cg05422352 | 2  | 232650747 | COPS7B    | -1.466±0.257 | -1.916±0.639 | 2.02E-05 |
| cg08020808 | 14 | 24977773  | CMA1      | -0.548±0.314 | -1.067±0.731 | 2.03E-05 |
| cg08186362 | 20 | 60794868  | HRH3      | -3.635±0.564 | -2.429±1.742 | 2.03E-05 |
| cg23639989 | 5  | 14581642  | FAM105A   | -3.755±0.437 | -4.396±0.887 | 2.04E-05 |
| cg16052901 | 6  | 33240864  | RPS18     | -0.47±0.273  | -1.001±0.761 | 2.05E-05 |
| cg26466858 | 1  | 152595842 | LCE3A     | -1.261±0.231 | -0.774±0.703 | 2.05E-05 |
| cg04577715 | 5  | 147211181 | SPINK1    | 3.528±0.242  | 2.89±0.932   | 2.06E-05 |
| cg07434382 | 16 | 69984372  | CLEC18A   | 1.267±0.177  | 0.924±0.492  | 2.06E-05 |
| cg10617171 | 19 | 35521856  | SCN1B     | -4.264±0.892 | -3.357±1.107 | 2.06E-05 |
| cg09083627 | 13 | 88324597  | SLITRK5   | -3.079±0.962 | -1.99±1.402  | 2.07E-05 |
| cg10900550 | 9  | 100173984 | TDRD7     | -3.249±0.193 | -3.46±0.267  | 2.08E-05 |
| cg12232274 | 6  | 150185854 | LRP11     | -2.786±0.301 | -3.291±0.714 | 2.08E-05 |
| cg01678321 | 5  | 150683530 | SLC36A3   | 1.396±0.28   | 0.94±0.642   | 2.09E-05 |
| cg16725130 | 12 | 56236647  | MMP19     | -1.623±0.35  | -1.072±0.771 | 2.09E-05 |
| cg14772955 | 1  | 36024404  | NCDN      | 0.461±0.2    | 0.779±0.446  | 2.10E-05 |
| cg20340596 | 10 | 100206925 | HPS1      | 2.259±0.326  | 1.671±0.839  | 2.12E-05 |
| cg26755793 | 18 | 24220540  | KCTD1     | 0.192±0.277  | -0.224±0.579 | 2.12E-05 |
| cg22319147 | 16 | 66400599  | CDH5      | 0.423±0.233  | 1.065±0.943  | 2.12E-05 |
| cg22963452 | 11 | 312766    | IFITM1    | 1.764±0.318  | 1.471±0.333  | 2.12E-05 |
| cg15425280 | 4  | 158141492 | GRIA2     | -2.665±0.303 | -2.004±0.959 | 2.13E-05 |
| cg02569613 | 10 | 50323127  | VSTM4     | -2.411±0.458 | -1.788±0.851 | 2.14E-05 |
| cg01138020 | 17 | 4337094   | SPNS3     | 0.076±0.353  | -0.644±1.039 | 2.16E-05 |
| cg07409200 | 13 | 43354674  | FAM216B   | 0.3±0.235    | -0.353±0.959 | 2.16E-05 |
| cg22333888 | 20 | 3663421   | ADAM33    | -0.803±0.326 | -0.283±0.732 | 2.16E-05 |
| cg17118262 | 17 | 32690569  | CCL1      | -0.758±0.264 | -1.403±0.943 | 2.18E-05 |
| cg05899618 | 2  | 20865847  | GDF7      | -3.825±0.33  | -2.698±1.666 | 2.18E-05 |
| cg01431114 | 6  | 166076971 | PDE10A    | -3.011±0.437 | -2.129±1.273 | 2.18E-05 |
| cg15937958 | 19 | 42947133  | CXCL17    | 1.266±0.339  | 0.652±0.878  | 2.18E-05 |
| cg00540769 | 5  | 80689492  | ACOT12    | -1.22±0.345  | -0.581±0.915 | 2.18E-05 |
| cg19837751 | 22 | 17645416  | CECR5     | 1.455±0.305  | 1.15±0.37    | 2.18E-05 |
| cg20773127 | 4  | 111397155 | ENPEP     | -1.246±0.363 | -0.736±0.702 | 2.19E-05 |
| cg20340242 | 2  | 102608349 | IL1R2     | -0.297±0.192 | -0.874±0.852 | 2.19E-05 |
| cg19098268 | 19 | 57352269  | MIMT1     | 1.152±0.188  | 1.573±0.612  | 2.19E-05 |
| cg04058169 | 10 | 124913438 | BUB3      | 1.562±0.424  | 0.972±0.811  | 2.19E-05 |
| cg22655224 | 16 | 56623448  | MT3       | -5.211±0.545 | -4.205±1.442 | 2.20E-05 |
| cg17398595 | 9  | 17578725  | SH3GL2    | -1.906±0.347 | -1.129±1.131 | 2.20E-05 |
| cg25268718 | 14 | 24604711  | PSME1     | -0.523±0.199 | -0.851±0.464 | 2.21E-05 |
| cg21636577 | 17 | 7121881   | DLG4      | 1.353±0.179  | 1.004±0.503  | 2.21E-05 |
| cg24765446 | 20 | 44167974  | WFDC6     | 1.616±0.28   | 1.059±0.803  | 2.21E-05 |
| cg04037228 | 3  | 45636386  | LIMD1     | -0.403±0.314 | -0.873±0.655 | 2.21E-05 |
| cg21674595 | 12 | 48877384  | C12orf54  | 0.365±0.317  | -0.156±0.7   | 2.22E-05 |
| cg23264413 | 19 | 43710277  | PSG4      | 1.361±0.246  | 0.949±0.584  | 2.23E-05 |
| cg22421766 | 1  | 1217658   | SCNN1D    | -1.633±0.256 | -2.078±0.634 | 2.23E-05 |
| cg08274552 | 2  | 220491834 | SLC4A3    | -0.034±0.303 | 0.518±0.79   | 2.23E-05 |
| cg25827139 | 17 | 8128467   | LINC00324 | 3.307±0.254  | 2.897±0.578  | 2.23E-05 |
| cg15782391 | 19 | 51293367  | ACPT      | 1.88±0.225   | 1.241±0.942  | 2.23E-05 |
| cg09547190 | 9  | 95857577  | C9orf89   | -0.256±0.648 | -0.888±0.757 | 2.24E-05 |
| cg12053284 | 18 | 40857256  | SYT4      | -4.563±0.387 | -3.799±1.104 | 2.24E-05 |
| cg19875656 | 3  | 46759096  | PRSS50    | 2.549±0.477  | 3.018±0.565  | 2.24E-05 |
| cg26681123 | 9  | 140125311 | SLC34A3   | 1.909±0.18   | 1.475±0.634  | 2.26E-05 |
| cg26415633 | 19 | 51327356  | KLK1      | -0.427±0.215 | -0.954±0.772 | 2.26E-05 |
| cg08801754 | 5  | 132363022 | ZCCHC10   | 1.625±0.236  | 1.423±0.214  | 2.27E-05 |
| cg05193832 | 11 | 128736844 | KCNJ1     | 2.479±0.2    | 1.844±0.94   | 2.27E-05 |
| cg04311964 | 8  | 143833942 | LYPD2     | 1.633±0.295  | 1.234±0.545  | 2.27E-05 |
| cg19420968 | 1  | 32084964  | HCRTR1    | 3.219±0.326  | 2.786±0.59   | 2.28E-05 |
| cg15582789 | 9  | 99145525  | SLC35D2   | -1.944±0.371 | -1.517±0.556 | 2.28E-05 |

|            |    |           |                    |              |              |          |
|------------|----|-----------|--------------------|--------------|--------------|----------|
| cg19464252 | 16 | 30675233  | <i>FBRS</i>        | 1.684±0.386  | 1.209±0.634  | 2.28E-05 |
| cg08849574 | 19 | 58125953  | <i>ZNF134</i>      | -3.016±0.346 | -2.295±1.047 | 2.30E-05 |
| cg27600794 | 10 | 118349430 | <i>PNLIPRP1</i>    | 1.103±0.291  | 0.449±0.955  | 2.30E-05 |
| cg08261094 | 7  | 37956276  | <i>SFRP4</i>       | -2.222±0.444 | -1.552±0.937 | 2.30E-05 |
| cg22827524 | 1  | 222910746 | <i>FAM177B</i>     | 2.655±0.214  | 2.02±0.938   | 2.30E-05 |
| cg13378388 | 4  | 177713813 | <i>VEGFC</i>       | -4.783±0.455 | -3.667±1.637 | 2.30E-05 |
| cg14323109 | 4  | 55991943  | <i>KDR</i>         | -3.822±0.407 | -3.143±0.965 | 2.32E-05 |
| cg19118812 | 7  | 37488438  | <i>ELMO1</i>       | -4.967±0.498 | -3.556±2.085 | 2.33E-05 |
| cg06614002 | 22 | 38380439  | <i>SOX10</i>       | 3.285±0.339  | 2.633±0.941  | 2.33E-05 |
| cg04783231 | 19 | 57050834  | <i>ZFP28</i>       | -2.19±0.357  | -1.815±0.471 | 2.34E-05 |
| cg24870273 | 6  | 31938891  | <i>STK19</i>       | 1.625±0.271  | 1.04±0.853   | 2.34E-05 |
| cg07196761 | 11 | 73586776  | <i>PAAF1</i>       | 2.625±0.261  | 2.194±0.613  | 2.34E-05 |
| cg21629895 | 2  | 25565795  | <i>DNMT3A</i>      | 0.98±0.157   | 0.64±0.497   | 2.35E-05 |
| cg22476084 | 11 | 117747874 | <i>FXYP6-FXYP2</i> | -3.349±0.311 | -2.823±0.749 | 2.35E-05 |
| cg11465971 | 4  | 54966336  | <i>GSX2</i>        | -3.473±0.391 | -2.788±0.98  | 2.36E-05 |
| cg25242557 | 11 | 31833264  | <i>PAX6</i>        | -2±0.438     | -1.414±0.802 | 2.36E-05 |
| cg01321151 | 11 | 925523    | <i>AP2A2</i>       | -0.246±0.206 | 0.141±0.559  | 2.36E-05 |
| cg01316071 | 14 | 95876996  | <i>LINC00341</i>   | 2.8±0.313    | 2.245±0.796  | 2.36E-05 |
| cg22222251 | 7  | 44039076  | <i>SPDYE1</i>      | 0.932±0.27   | 0.664±0.326  | 2.36E-05 |
| cg02552572 | 16 | 56597746  | <i>MT4</i>         | 1.499±0.199  | 1.045±0.665  | 2.37E-05 |
| cg00297600 | 8  | 35401670  | <i>UNC5D</i>       | -0.67±0.235  | -1.18±0.744  | 2.38E-05 |
| cg00307685 | 1  | 92415524  | <i>BRDT</i>        | 2.823±0.187  | 2.394±0.627  | 2.38E-05 |
| cg15777570 | 9  | 34662951  | <i>CCL27</i>       | 2.6±0.155    | 2.407±0.26   | 2.38E-05 |
| cg26045434 | 8  | 21987861  | <i>HR</i>          | -2.498±0.403 | -1.716±1.133 | 2.38E-05 |
| cg14345882 | 6  | 26364793  | <i>BTN3A2</i>      | -0.204±0.484 | -0.854±0.891 | 2.38E-05 |
| cg25554036 | 4  | 62711136  | <i>WFS1</i>        | -2.153±0.294 | -2.605±0.637 | 2.38E-05 |
| cg00138126 | 20 | 56286697  | <i>PMEPA1</i>      | 1.028±0.205  | 0.556±0.691  | 2.39E-05 |
| cg27560922 | 16 | 330267    | <i>ARHGDIG</i>     | -4.345±0.475 | -3.207±1.673 | 2.40E-05 |
| cg17810944 | 20 | 42876091  | <i>GDAP1L1</i>     | -3.184±0.313 | -2.43±1.108  | 2.40E-05 |
| cg10520887 | 4  | 96470094  | <i>UNC5C</i>       | -3.294±0.477 | -2.505±1.123 | 2.41E-05 |
| cg17982102 | 18 | 9707896   | <i>RAB31</i>       | -3.127±0.324 | -2.246±1.302 | 2.41E-05 |
| cg17036737 | 1  | 145507675 | <i>RBM8A</i>       | -0.197±0.243 | -0.547±0.488 | 2.41E-05 |
| cg08341874 | 17 | 4689655   | <i>VMO1</i>        | -3.18±0.285  | -2.215±1.437 | 2.42E-05 |
| cg04011402 | 5  | 95188290  | <i>C5orf27</i>     | 1.251±0.154  | 1.116±0.148  | 2.43E-05 |
| cg22836229 | 8  | 49647717  | <i>EFCAB1</i>      | -2.037±0.513 | -1.105±1.342 | 2.43E-05 |
| cg10226546 | 20 | 50158996  | <i>NFATC2</i>      | -2.075±0.51  | -2.542±0.535 | 2.43E-05 |
| cg27480700 | 19 | 52800524  | <i>ZNF480</i>      | -5.118±0.643 | -4.202±1.272 | 2.43E-05 |
| cg13246592 | 17 | 3600461   | <i>P2RX5</i>       | -1.262±0.288 | -0.876±0.53  | 2.43E-05 |
| cg02498063 | 12 | 119772577 | <i>CCDC60</i>      | 0.046±0.337  | 0.543±0.694  | 2.44E-05 |
| cg15381313 | 12 | 100867509 | <i>NR1H4</i>       | -0.026±0.372 | 0.469±0.68   | 2.47E-05 |
| cg26832879 | 19 | 54620073  | <i>TFPT</i>        | 1.15±0.326   | 1.665±0.73   | 2.47E-05 |
| cg04600618 | 6  | 43612980  | <i>RSPH9</i>       | -3.528±0.503 | -2.527±1.456 | 2.48E-05 |
| cg10531372 | 1  | 212798363 | <i>FAM71A</i>      | 2.309±0.185  | 2.033±0.388  | 2.48E-05 |
| cg16692277 | 13 | 51640948  | <i>GUCY1B2</i>     | -1.271±0.311 | -1.893±0.905 | 2.48E-05 |
| cg26894575 | 1  | 153518054 | <i>S100A4</i>      | -1.777±0.363 | -2.423±0.931 | 2.49E-05 |
| cg01963696 | 19 | 851650    | <i>ELANE</i>       | 0.406±0.35   | -0.231±0.918 | 2.49E-05 |
| cg14183455 | 1  | 31196733  | <i>MATN1</i>       | 1.94±0.238   | 2.271±0.46   | 2.49E-05 |
| cg19547629 | 3  | 39851641  | <i>MYRIP</i>       | -4.606±0.602 | -3.466±1.652 | 2.50E-05 |
| cg15538820 | 9  | 136084818 | <i>OBP2B</i>       | 4.425±0.346  | 3.795±0.91   | 2.52E-05 |
| cg21062347 | 11 | 62783543  | <i>SLC22A8</i>     | -1.86±0.289  | -1.342±0.746 | 2.52E-05 |
| cg23002761 | 1  | 16085642  | <i>FBLIM1</i>      | -4.14±0.796  | -3.157±1.323 | 2.53E-05 |
| cg19517291 | 15 | 85201039  | <i>NMB</i>         | 2.317±0.2    | 1.733±0.868  | 2.53E-05 |
| cg16994506 | 12 | 4383724   | <i>CCND2</i>       | -4.122±0.481 | -3.007±1.64  | 2.54E-05 |
| cg07663789 | 5  | 32711429  | <i>NPR3</i>        | -4.955±0.521 | -3.961±1.442 | 2.57E-05 |
| cg04914105 | 15 | 75872043  | <i>PTPN9</i>       | -3.638±0.256 | -3.896±0.32  | 2.58E-05 |
| cg16759954 | 17 | 6461153   | <i>ACKR6</i>       | 3.265±0.205  | 3.041±0.291  | 2.60E-05 |
| cg10777851 | 3  | 112051808 | <i>CD200</i>       | -4.062±0.283 | -3.222±1.252 | 2.60E-05 |
| cg04132607 | 20 | 61041456  | <i>GATA5</i>       | 2.628±0.372  | 2.058±0.807  | 2.61E-05 |
| cg09809672 | 1  | 236557682 | <i>EDARADD</i>     | 1.306±0.389  | 0.674±0.902  | 2.61E-05 |
| cg12491710 | 19 | 51891526  | <i>LIM2</i>        | 3.242±0.55   | 3.806±0.708  | 2.62E-05 |
| cg09272256 | 10 | 5238881   | <i>AKR1C4</i>      | 1.841±0.321  | 1.312±0.757  | 2.62E-05 |
| cg24800810 | 1  | 241520926 | <i>RGS7</i>        | -2.401±0.346 | -1.599±1.182 | 2.63E-05 |
| cg25886284 | 19 | 36909418  | <i>ZFP82</i>       | -5.197±0.509 | -3.707±2.221 | 2.64E-05 |
| cg03533058 | 12 | 52437571  | <i>NR4A1</i>       | 1.07±0.234   | 1.436±0.52   | 2.64E-05 |
| cg26466094 | 1  | 77748129  | <i>AK5</i>         | -4.927±0.312 | -4.039±1.321 | 2.65E-05 |
| cg13346411 | 11 | 6280512   | <i>CCKBR</i>       | -3.479±0.409 | -2.761±1.037 | 2.65E-05 |
| cg15272690 | 16 | 58284024  | <i>CCDC113</i>     | -4.203±0.231 | -4.417±0.251 | 2.65E-05 |

|            |    |           |                    |              |              |          |
|------------|----|-----------|--------------------|--------------|--------------|----------|
| cg21137417 | 2  | 234959456 | <i>SPP2</i>        | 2.181±0.249  | 1.656±0.77   | 2.65E-05 |
| cg15770654 | 1  | 12078821  | <i>MIIP</i>        | 3.372±0.233  | 2.756±0.914  | 2.66E-05 |
| cg08375941 | 3  | 98250382  | <i>GPR15</i>       | 1.115±0.236  | 0.598±0.76   | 2.66E-05 |
| cg03818682 | 11 | 1213459   | <i>0</i>           | 1.639±0.209  | 1.199±0.646  | 2.66E-05 |
| cg16257091 | 11 | 27743580  | <i>BDNF</i>        | -3.374±0.536 | -2.524±1.211 | 2.67E-05 |
| cg03843951 | 7  | 50629634  | <i>DDC</i>         | 1.818±0.257  | 1.534±0.37   | 2.67E-05 |
| cg24051818 | 1  | 55107918  | <i>HEATR8-TTC4</i> | 2.643±0.189  | 2.28±0.529   | 2.67E-05 |
| cg18546419 | 5  | 176433891 | <i>UIMC1</i>       | -4.348±0.391 | -4.715±0.435 | 2.67E-05 |
| cg15319451 | 1  | 15480748  | <i>TMEM51</i>      | -3.598±0.39  | -3.182±0.531 | 2.67E-05 |
| cg03991512 | 16 | 75150456  | <i>LDHD</i>        | -1.942±0.401 | -1.39±0.768  | 2.70E-05 |
| cg08929103 | 17 | 43860355  | <i>CRHR1</i>       | 1.033±0.244  | 0.543±0.718  | 2.70E-05 |
| cg02867079 | 14 | 100111269 | <i>HHIPL1</i>      | -3.547±0.59  | -2.668±1.241 | 2.70E-05 |
| cg14223995 | 4  | 141489799 | <i>UCP1</i>        | -2.718±0.426 | -1.861±1.253 | 2.71E-05 |
| cg04645843 | 6  | 30918653  | <i>DPCR1</i>       | 1.383±0.229  | 0.934±0.656  | 2.72E-05 |
| cg01557989 | 20 | 19192675  | <i>SLC24A3</i>     | -4.296±0.516 | -3.478±1.167 | 2.72E-05 |
| cg04149472 | 8  | 18066144  | <i>NAT1</i>        | 2.593±0.163  | 2.097±0.742  | 2.72E-05 |
| cg20324165 | 12 | 53299145  | <i>KRT8</i>        | -0.067±0.208 | -0.59±0.776  | 2.73E-05 |
| cg03663715 | 5  | 72744904  | <i>FOXD1</i>       | -3.086±0.233 | -2.188±1.35  | 2.73E-05 |
| cg13259290 | 5  | 131408382 | <i>CSF2</i>        | 0.992±0.258  | 0.455±0.787  | 2.73E-05 |
| cg17108383 | 5  | 140867724 | <i>PCDHGC5</i>     | 3.199±0.303  | 2.794±0.561  | 2.74E-05 |
| cg26815021 | 17 | 74733172  | <i>SRSF2</i>       | -2.332±0.246 | -2.101±0.273 | 2.74E-05 |
| cg25764570 | 6  | 32407289  | <i>HLA-DRA</i>     | 0.902±0.226  | 0.468±0.633  | 2.76E-05 |
| cg21522797 | 16 | 81806083  | <i>0</i>           | 2.787±0.24   | 2.219±0.842  | 2.76E-05 |
| cg23713520 | 16 | 57318087  | <i>PLLP</i>        | -2.801±0.479 | -2.175±0.861 | 2.77E-05 |
| cg02401149 | 22 | 25595409  | <i>CRYBB3</i>      | 2.634±0.196  | 2.396±0.32   | 2.77E-05 |
| cg19167673 | 22 | 39640835  | <i>PDGFB</i>       | -4.438±0.646 | -3.726±0.928 | 2.77E-05 |
| cg13445249 | 18 | 28957111  | <i>DSG4</i>        | 1.079±0.293  | 0.675±0.563  | 2.78E-05 |
| cg00094319 | 13 | 25670530  | <i>PABPC3</i>      | 1.637±0.307  | 1.924±0.339  | 2.78E-05 |
| cg22543128 | 9  | 67786307  | <i>FAM27E3</i>     | 2.362±0.208  | 2.126±0.31   | 2.78E-05 |
| cg11754206 | 8  | 73448579  | <i>KCNB2</i>       | -3.038±0.291 | -2.412±0.922 | 2.79E-05 |
| cg06029655 | 19 | 42881132  | <i>MEGF8</i>       | 2.907±0.348  | 2.495±0.551  | 2.79E-05 |
| cg19205533 | 12 | 15373987  | <i>RERG</i>        | -0.275±0.138 | -0.707±0.647 | 2.79E-05 |
| cg06621126 | 16 | 67198243  | <i>HSF4</i>        | -4.535±0.463 | -3.917±0.856 | 2.80E-05 |
| cg27363486 | 1  | 228603645 | <i>TRIM17</i>      | 0.825±0.219  | 1.219±0.571  | 2.80E-05 |
| cg17759354 | 16 | 56898786  | <i>SLC12A3</i>     | 3.097±0.337  | 2.742±0.453  | 2.82E-05 |
| cg13021384 | 15 | 50474754  | <i>SLC27A2</i>     | -4.755±0.44  | -5.173±0.502 | 2.84E-05 |
| cg24497819 | 12 | 109027683 | <i>SELPLG</i>      | 0.087±0.34   | -0.471±0.803 | 2.85E-05 |
| cg27653134 | 12 | 8975309   | <i>A2ML1</i>       | 1.204±0.286  | 0.763±0.628  | 2.87E-05 |
| cg05484458 | 12 | 6949260   | <i>GNB3</i>        | 1.354±0.261  | 0.996±0.5    | 2.87E-05 |
| cg02735486 | 4  | 113970935 | <i>ANK2</i>        | -0.939±0.365 | -0.312±0.907 | 2.87E-05 |
| cg18399321 | 22 | 39853590  | <i>MGAT3</i>       | -5.259±0.628 | -4.066±1.742 | 2.87E-05 |
| cg03386373 | 2  | 231860456 | <i>LOC348761</i>   | 1.422±0.272  | 0.973±0.646  | 2.89E-05 |
| cg00035347 | 10 | 104953608 | <i>NT5C2</i>       | -0.458±0.312 | -0.876±0.58  | 2.89E-05 |
| cg16338347 | 3  | 105085463 | <i>ALCAM</i>       | -4.236±0.325 | -4.514±0.304 | 2.90E-05 |
| cg14358743 | 13 | 114568252 | <i>GAS6-AS2</i>    | 3.485±0.236  | 2.97±0.761   | 2.90E-05 |
| cg09429111 | 9  | 96792562  | <i>PTPDC1</i>      | -4.163±0.354 | -4.535±0.475 | 2.90E-05 |
| cg17291001 | 14 | 95107626  | <i>SERPINA13P</i>  | 2.047±0.23   | 1.58±0.686   | 2.90E-05 |
| cg22085335 | 2  | 11052081  | <i>KCNF1</i>       | -4.483±0.521 | -3.916±0.739 | 2.92E-05 |
| cg08578641 | 9  | 34457440  | <i>FAM219A</i>     | -0.582±0.439 | 0.068±0.922  | 2.92E-05 |
| cg15955341 | 1  | 110198890 | <i>GSTM4</i>       | -5.927±0.456 | -5.388±0.725 | 2.92E-05 |
| cg19764555 | 11 | 62315119  | <i>AHNAK</i>       | -1.907±0.516 | -1.364±0.696 | 2.93E-05 |
| cg13002506 | 11 | 76998821  | <i>GDPD4</i>       | 1.024±0.3    | 0.431±0.871  | 2.93E-05 |
| cg20103758 | 5  | 128300696 | <i>SLC27A6</i>     | -2.78±0.251  | -2.098±1.019 | 2.93E-05 |
| cg19703610 | 11 | 117667737 | <i>DSCAML1</i>     | -3.215±0.412 | -2.473±1.082 | 2.94E-05 |
| cg11668512 | 20 | 39929580  | <i>ZHX3</i>        | 3.358±0.304  | 3.007±0.469  | 2.96E-05 |
| cg19668234 | 3  | 46759449  | <i>PRSS50</i>      | -0.035±0.572 | 0.575±0.786  | 2.97E-05 |
| cg08164315 | 5  | 40679182  | <i>PTGER4</i>      | -4.335±0.501 | -4.839±0.632 | 2.97E-05 |
| cg17274742 | 7  | 23286539  | <i>GPNCB</i>       | 0.248±0.26   | -0.387±0.946 | 2.98E-05 |
| cg08853659 | 3  | 139654245 | <i>CLSTN2</i>      | -4.709±0.467 | -3.462±1.866 | 2.98E-05 |
| cg00229387 | 6  | 43445942  | <i>TJAP1</i>       | -1.192±0.189 | -1.632±0.654 | 2.99E-05 |
| cg20651681 | 7  | 50861418  | <i>GRB10</i>       | -3.439±0.493 | -2.832±0.828 | 3.01E-05 |
| cg19463518 | 19 | 634035    | <i>POLRMT</i>      | -3.202±0.431 | -3.58±0.426  | 3.02E-05 |
| cg23580000 | 16 | 50322156  | <i>ADCY7</i>       | 3.433±0.329  | 3.798±0.48   | 3.04E-05 |
| cg08942875 | 4  | 48908902  | <i>OCIAD2</i>      | -3.602±0.341 | -4.084±0.68  | 3.05E-05 |
| cg12271671 | 7  | 76829059  | <i>FGL2</i>        | -2.924±0.302 | -2.153±1.154 | 3.05E-05 |
| cg19740375 | 3  | 38690410  | <i>SCN5A</i>       | -2.276±0.307 | -1.667±0.896 | 3.05E-05 |
| cg25677709 | 5  | 149900459 | <i>NDST1</i>       | 1.895±0.217  | 2.137±0.317  | 3.05E-05 |

|            |    |           |                  |              |              |          |
|------------|----|-----------|------------------|--------------|--------------|----------|
| cg16539629 | 14 | 96505722  | <i>C14orf132</i> | -3.543±0.9   | -2.588±1.232 | 3.06E-05 |
| cg09702010 | 19 | 51531393  | <i>KLK11</i>     | -0.55±0.28   | -1.009±0.662 | 3.07E-05 |
| cg08256691 | 1  | 155881846 | <i>RIT1</i>      | 1.341±0.293  | 0.583±1.135  | 3.08E-05 |
| cg11051139 | 12 | 52580428  | <i>KRT80</i>     | 1.624±0.272  | 1.185±0.634  | 3.09E-05 |
| cg04123409 | 12 | 113841617 | <i>SDS</i>       | -0.746±0.292 | -1.239±0.715 | 3.11E-05 |
| cg21279955 | 1  | 153747551 | <i>SLC27A3</i>   | -2.509±0.401 | -2.086±0.544 | 3.11E-05 |
| cg00745543 | 12 | 48722754  | <i>H1FNT</i>     | 3.045±0.26   | 2.647±0.57   | 3.12E-05 |
| cg18959422 | 1  | 203145364 | <i>MYBPH</i>     | -0.159±0.247 | -0.739±0.865 | 3.13E-05 |
| cg08548888 | 3  | 38180840  | <i>MYD88</i>     | -2.77±0.24   | -3.059±0.391 | 3.13E-05 |
| cg17342759 | 5  | 146461855 | <i>PPP2R2B</i>   | 1.399±0.25   | 0.888±0.755  | 3.15E-05 |
| cg15557833 | 4  | 128886857 | <i>MFSD8</i>     | -2.423±0.326 | -2.117±0.368 | 3.16E-05 |
| cg06353948 | 9  | 135231016 | <i>SETX</i>      | 2.489±0.363  | 2.033±0.627  | 3.16E-05 |
| cg16001913 | 10 | 71029644  | <i>HK1</i>       | 1.588±0.28   | 1.219±0.514  | 3.18E-05 |
| cg14319409 | 5  | 151304409 | <i>GLRA1</i>     | -2.86±0.442  | -2.123±1.068 | 3.18E-05 |
| cg02066681 | 21 | 46823800  | <i>COL18A1</i>   | 1.034±0.254  | 0.626±0.589  | 3.18E-05 |
| cg23739862 | 12 | 3600666   | <i>PRMT8</i>     | -3.694±0.718 | -2.599±1.568 | 3.19E-05 |
| cg21281799 | 12 | 68041322  | <i>DYRK2</i>     | 1.304±0.261  | 0.693±0.913  | 3.19E-05 |
| cg01313514 | 1  | 228194916 | <i>WNT3A</i>     | -3.232±0.626 | -2.418±1.129 | 3.20E-05 |
| cg05871136 | 10 | 72971961  | <i>UNC5B</i>     | -3.953±0.372 | -3.403±0.785 | 3.21E-05 |
| cg12815841 | 10 | 126150822 | <i>LHPP</i>      | -2.313±0.331 | -2.663±0.454 | 3.22E-05 |
| cg25736482 | 19 | 54677232  | <i>TMC4</i>      | -1.156±0.41  | -1.615±0.608 | 3.22E-05 |
| cg22022041 | 3  | 45928137  | <i>CCR9</i>      | 2.326±0.132  | 1.965±0.544  | 3.22E-05 |
| cg01982833 | 12 | 27174596  | <i>MED21</i>     | -0.985±0.315 | -1.457±0.676 | 3.23E-05 |
| cg26251101 | 2  | 46768944  | <i>RHOQ</i>      | -3.605±0.394 | -4.068±0.626 | 3.23E-05 |
| cg15746187 | 1  | 11713123  | <i>FBXO44</i>    | 1.164±0.435  | 0.59±0.801   | 3.23E-05 |
| cg23274244 | 17 | 16875951  | <i>TNFRSF13B</i> | 2.328±0.183  | 1.98±0.512   | 3.24E-05 |
| cg02595219 | 11 | 74178761  | <i>KCNE3</i>     | -2.881±0.518 | -1.999±1.284 | 3.24E-05 |
| cg15802898 | 9  | 100615201 | <i>FOXE1</i>     | -3.783±0.298 | -2.906±1.323 | 3.25E-05 |
| cg13694749 | 17 | 62050038  | <i>SCN4A</i>     | 1.958±0.276  | 1.411±0.81   | 3.25E-05 |
| cg11768416 | 12 | 91348697  | <i>CCER1</i>     | 4.813±0.391  | 4.402±0.53   | 3.26E-05 |
| cg01316819 | 12 | 54982281  | <i>PPP1R1A</i>   | -3.548±0.756 | -2.777±0.981 | 3.26E-05 |
| cg05825950 | 1  | 207669576 | <i>CR1</i>       | -2.916±0.326 | -2.253±0.983 | 3.27E-05 |
| cg20769842 | 15 | 23810238  | <i>MKRN3</i>     | 0.901±0.334  | 0.506±0.535  | 3.27E-05 |
| cg07595113 | 8  | 67525279  | <i>MYBL1</i>     | -4.086±0.395 | -3.743±0.387 | 3.28E-05 |
| cg19734228 | 9  | 90113593  | <i>DAPK1</i>     | -3.968±0.92  | -3.141±0.964 | 3.28E-05 |
| cg25423576 | 6  | 117197952 | <i>RFX6</i>      | -3.788±0.489 | -2.945±1.232 | 3.32E-05 |
| cg17886028 | 12 | 4383507   | <i>CCND2</i>     | -4.459±0.418 | -3.422±1.557 | 3.32E-05 |
| cg22552966 | 17 | 19620595  | <i>SLC47A2</i>   | 3.978±0.414  | 3.461±0.712  | 3.32E-05 |
| cg27436184 | 19 | 45449006  | <i>APOC2</i>     | 2.088±0.269  | 1.812±0.352  | 3.32E-05 |
| cg13191808 | 1  | 55505327  | <i>PCSK9</i>     | -4.395±0.631 | -3.705±0.907 | 3.32E-05 |
| cg24254206 | 19 | 46196934  | <i>QPCTL</i>     | -1.62±0.278  | -2.015±0.56  | 3.33E-05 |
| cg04278702 | 6  | 87647399  | <i>HTR1E</i>     | -3.548±0.458 | -2.74±1.184  | 3.33E-05 |
| cg21518947 | 11 | 67222648  | <i>CABP4</i>     | 0.88±0.218   | 0.552±0.471  | 3.33E-05 |
| cg18011401 | 19 | 13617366  | <i>CACNA1A</i>   | -3.774±0.471 | -2.862±1.348 | 3.35E-05 |
| cg02347114 | 2  | 99871669  | <i>LYG2</i>      | 2.626±0.269  | 2.291±0.462  | 3.35E-05 |
| cg18896687 | 7  | 1571125   | <i>MAFK</i>      | -4.844±0.364 | -5.219±0.479 | 3.35E-05 |
| cg04335339 | 10 | 116853118 | <i>ATRNL1</i>    | -2.266±0.433 | -1.499±1.125 | 3.36E-05 |
| cg11456838 | 6  | 159278754 | <i>OSTCP1</i>    | 0.588±0.274  | 0.091±0.731  | 3.37E-05 |
| cg18270343 | 8  | 143748005 | <i>JRK</i>       | 0.744±0.311  | 1.435±1.032  | 3.37E-05 |
| cg25040282 | 4  | 70893962  | <i>HTN3</i>      | 1.649±0.228  | 1.179±0.698  | 3.37E-05 |
| cg13553498 | 12 | 9821986   | <i>CLEC2D</i>    | 1.731±0.373  | 1.267±0.64   | 3.37E-05 |
| cg11648289 | 7  | 155249674 | <i>EN2</i>       | -4.671±0.466 | -3.643±1.535 | 3.38E-05 |
| cg27601516 | 14 | 23452417  | <i>AJUBA</i>     | -3.167±0.248 | -2.885±0.378 | 3.38E-05 |
| cg13666729 | 1  | 32930473  | <i>ZBTB8B</i>    | -4.662±0.447 | -3.739±1.374 | 3.38E-05 |
| cg12032049 | 17 | 56314779  | <i>LPO</i>       | 1.628±0.18   | 1.116±0.774  | 3.41E-05 |
| cg17926869 | 19 | 18046000  | <i>CCDC124</i>   | 2.56±0.261   | 2.857±0.399  | 3.42E-05 |
| cg08427977 | 10 | 50323832  | <i>VSTM4</i>     | -0.45±0.198  | -0.873±0.632 | 3.42E-05 |
| cg14376424 | 5  | 156592780 | <i>FAM71B</i>    | 4.052±0.352  | 3.414±0.94   | 3.43E-05 |
| cg00601486 | 12 | 48723148  | <i>H1FNT</i>     | 3.414±0.283  | 2.836±0.858  | 3.43E-05 |
| cg04749372 | 7  | 30791871  | <i>INMT</i>      | 0.26±0.188   | 0.601±0.501  | 3.44E-05 |
| cg13462160 | 22 | 39916704  | <i>ATF4</i>      | -1.252±0.164 | -1.096±0.19  | 3.47E-05 |
| cg15804973 | 6  | 137114513 | <i>MAP3K5</i>    | -2.039±0.414 | -2.415±0.446 | 3.47E-05 |
| cg17703212 | 10 | 82117257  | <i>DYDC2</i>     | -1.125±0.331 | -0.58±0.794  | 3.50E-05 |
| cg11037818 | 1  | 208041879 | <i>O</i>         | -3.34±0.388  | -2.967±0.46  | 3.50E-05 |
| cg10430690 | 3  | 123813596 | <i>KALRN</i>     | 2.955±0.314  | 2.435±0.759  | 3.52E-05 |
| cg11161873 | 7  | 112120943 | <i>LSMEM1</i>    | 0.534±0.366  | 1.012±0.67   | 3.53E-05 |
| cg23180489 | 8  | 143859786 | <i>LYNX1</i>     | 1.814±0.306  | 1.359±0.654  | 3.53E-05 |

|            |    |           |            |              |              |          |
|------------|----|-----------|------------|--------------|--------------|----------|
| cg12556325 | 7  | 150026731 | ZBED6CL    | 0.582±0.278  | 0.922±0.468  | 3.53E-05 |
| cg11059341 | 2  | 211179560 | MYL1       | 1.954±0.242  | 1.425±0.792  | 3.53E-05 |
| cg20774846 | 8  | 105479420 | DPYS       | -0.646±0.247 | -0.07±0.866  | 3.54E-05 |
| cg27180443 | 12 | 125348871 | SCARB1     | 0.68±0.165   | 0.386±0.433  | 3.54E-05 |
| cg07816439 | 5  | 159797845 | C1QTNF2    | -0.662±0.209 | -0.31±0.515  | 3.55E-05 |
| cg14045072 | 6  | 46884362  | GPR116     | 1.594±0.23   | 1.153±0.654  | 3.55E-05 |
| cg06781209 | 11 | 61594997  | FADS2      | -3.096±0.764 | -2.23±1.162  | 3.55E-05 |
| cg14896516 | 7  | 30722361  | CRHR2      | -4.925±0.544 | -3.599±1.998 | 3.55E-05 |
| cg23968383 | 8  | 125984927 | ZNF572     | 1.787±0.287  | 1.052±1.11   | 3.58E-05 |
| cg25112191 | 1  | 151804260 | RORC       | 0.229±0.156  | -0.246±0.722 | 3.58E-05 |
| cg03568718 | 1  | 3579873   | TP73       | 3.412±0.334  | 2.836±0.845  | 3.58E-05 |
| cg13823136 | 1  | 77333138  | ST6GALNAC5 | -5.205±0.544 | -4.154±1.561 | 3.64E-05 |
| cg11221132 | 22 | 42540342  | CYP2D7P1   | 1.856±0.222  | 1.617±0.315  | 3.65E-05 |
| cg06386517 | 7  | 50860866  | GRB10      | -4.688±1.113 | -3.567±1.429 | 3.66E-05 |
| cg04953015 | 8  | 27338236  | CHRNA2     | 2.123±0.276  | 1.673±0.656  | 3.67E-05 |
| cg07380416 | 11 | 60739172  | CD6        | 1.529±0.381  | 0.961±0.819  | 3.68E-05 |
| cg02456292 | 19 | 42817262  | TMEM145    | -2.888±0.221 | -2.457±0.641 | 3.68E-05 |
| cg27380758 | 8  | 22408571  | SORBS3     | -1.682±0.348 | -1.154±0.763 | 3.69E-05 |
| cg19465374 | 7  | 99573278  | AZGP1      | 2.179±0.218  | 1.722±0.685  | 3.69E-05 |
| cg20118424 | 2  | 169887275 | ABCB11     | 1.736±0.343  | 2.073±0.423  | 3.70E-05 |
| cg17682828 | 19 | 35632767  | FXYP1      | -2.101±0.277 | -2.596±0.73  | 3.71E-05 |
| cg11884243 | 9  | 137772886 | FCN2       | 1.753±0.428  | 1.175±0.818  | 3.71E-05 |
| cg20675440 | 16 | 69374895  | COG8       | 2.099±0.238  | 1.776±0.457  | 3.74E-05 |
| cg24116886 | 20 | 137877    | DEFB127    | 2.906±0.311  | 2.507±0.559  | 3.74E-05 |
| cg24727203 | 8  | 9007933   | PPP1R3B    | -3.738±0.344 | -3.369±0.487 | 3.75E-05 |
| cg12599000 | 9  | 99961508  | 0          | 2.475±0.296  | 2.153±0.426  | 3.78E-05 |
| cg22100821 | 20 | 656743    | SCRT2      | -3.755±0.439 | -3.002±1.108 | 3.79E-05 |
| cg08958015 | 12 | 49297901  | CCDC65     | -4.15±0.453  | -2.927±1.858 | 3.79E-05 |
| cg10287137 | 11 | 72929054  | P2RY2      | 0.619±0.272  | 0.066±0.827  | 3.80E-05 |
| cg25397076 | 1  | 10057305  | RBP7       | -5.421±0.848 | -4.406±1.395 | 3.80E-05 |
| cg22580353 | 19 | 45146900  | PVR        | -0.191±0.169 | -0.54±0.523  | 3.80E-05 |
| cg04290964 | 13 | 77564689  | CLN5       | 2.585±0.153  | 2.377±0.294  | 3.80E-05 |
| cg25107791 | 6  | 35764958  | CLPS       | 1.216±0.233  | 0.859±0.519  | 3.81E-05 |
| cg08505473 | 14 | 94255513  | PRIMA1     | -4.832±0.577 | -3.93±1.313  | 3.81E-05 |
| cg22789545 | 20 | 31871352  | BPIFB1     | 1.425±0.153  | 1.048±0.571  | 3.81E-05 |
| cg22586527 | 11 | 16499411  | SOX6       | 0.319±0.286  | -0.102±0.6   | 3.82E-05 |
| cg22792910 | 2  | 70009351  | ANXA4      | -0.783±0.323 | -1.208±0.599 | 3.82E-05 |
| cg05449414 | 4  | 467983    | ABCA11P    | -4.097±0.277 | -3.803±0.386 | 3.82E-05 |
| cg07861564 | 12 | 119616618 | HSPB8      | -4.537±0.515 | -4.031±0.638 | 3.83E-05 |
| cg18752854 | 2  | 218809254 | TNS1       | 0.604±0.248  | 0.977±0.54   | 3.83E-05 |
| cg24641737 | 1  | 111743271 | DENND2D    | -0.309±0.317 | -0.917±0.906 | 3.83E-05 |
| cg10240853 | 7  | 100210548 | MOSPD3     | -4.32±0.408  | -3.715±0.874 | 3.84E-05 |
| cg05595345 | 15 | 98504173  | ARRDC4     | -3.163±1.147 | -2.036±1.424 | 3.85E-05 |
| cg08797471 | 9  | 90113120  | DAPK1      | -2.525±0.617 | -1.871±0.861 | 3.85E-05 |
| cg16529592 | 1  | 25292215  | RUNX3      | 1.52±0.313   | 1.118±0.563  | 3.86E-05 |
| cg27610561 | 20 | 45337784  | SLC2A10    | 2.267±0.521  | 1.54±1.04    | 3.86E-05 |
| cg03343942 | 12 | 56625109  | SLC39A5    | 1.143±0.282  | 0.629±0.762  | 3.86E-05 |
| cg15903395 | 2  | 88824153  | TEX37      | 1.571±0.223  | 1.216±0.518  | 3.86E-05 |
| cg11920519 | 20 | 33135025  | MAP1LC3A   | 2.513±0.29   | 1.918±0.892  | 3.86E-05 |
| cg00168942 | 10 | 35894430  | GJD4       | 0.273±0.182  | -0.129±0.606 | 3.87E-05 |
| cg02100848 | 3  | 8693859   | SSUH2      | 1.5±0.266    | 1.044±0.673  | 3.87E-05 |
| cg16670497 | 1  | 110210913 | GSTM2      | -3.844±0.551 | -2.98±1.259  | 3.88E-05 |
| cg16773899 | 5  | 83680326  | EDIL3      | -3.059±0.659 | -2.139±1.316 | 3.89E-05 |
| cg26770281 | 19 | 56109975  | FIZ1       | 3.3±0.233    | 3.533±0.299  | 3.91E-05 |
| cg24505375 | 8  | 11188774  | SLC35G5    | 1.075±0.344  | 0.786±0.32   | 3.92E-05 |
| cg23877385 | 15 | 59908652  | GCNT3      | 1.531±0.265  | 0.887±0.976  | 3.92E-05 |
| cg06960698 | 13 | 103054846 | FGF14      | -2.748±0.303 | -2.258±0.718 | 3.94E-05 |
| cg21937886 | 5  | 179779954 | GFPT2      | -3.486±0.597 | -2.828±0.88  | 3.95E-05 |
| cg18113270 | 11 | 102713490 | MMP3       | 2.894±0.216  | 2.578±0.455  | 3.97E-05 |
| cg14174099 | 14 | 70655862  | SLC8A3     | -5.33±0.471  | -4.03±1.982  | 3.98E-05 |
| cg12289045 | 19 | 51141361  | SYT3       | -0.453±0.421 | 0.121±0.819  | 4.02E-05 |
| cg01108476 | 6  | 35109383  | TCP11      | 3.487±0.341  | 2.928±0.822  | 4.02E-05 |
| cg06790324 | 7  | 50860564  | GRB10      | -3.797±1.016 | -2.791±1.282 | 4.02E-05 |
| cg16176600 | 6  | 116381609 | FRK        | -0.444±0.316 | -0.911±0.676 | 4.03E-05 |
| cg17500962 | 16 | 73178951  | C16orf47   | 1.23±0.232   | 0.778±0.678  | 4.03E-05 |
| cg25552492 | 8  | 22013999  | LGI3       | -3.541±0.449 | -2.83±1.04   | 4.03E-05 |
| cg24919884 | 1  | 3380288   | ARHGEF16   | 2.526±0.353  | 2.109±0.573  | 4.03E-05 |

|            |    |           |           |              |              |          |
|------------|----|-----------|-----------|--------------|--------------|----------|
| cg20670302 | 18 | 43652172  | PSTPIP2   | -5.707±1.292 | -4.475±1.533 | 4.03E-05 |
| cg09864990 | 20 | 61041274  | GATA5     | 1.921±0.226  | 1.504±0.622  | 4.03E-05 |
| cg08203715 | 11 | 126226154 | ST3GAL4   | -1.804±0.439 | -2.598±1.182 | 4.04E-05 |
| cg02810134 | 20 | 44455922  | TNNC2     | 3.368±0.229  | 3.034±0.483  | 4.05E-05 |
| cg14894216 | 11 | 65794352  | CATSPER1  | 0.412±0.292  | -0.111±0.777 | 4.05E-05 |
| cg07331806 | 22 | 21319894  | AIFM3     | -1.88±0.319  | -1.346±0.789 | 4.09E-05 |
| cg15095327 | 3  | 9944512   | IL17RE    | -0.277±0.19  | -0.734±0.695 | 4.12E-05 |
| cg14832904 | 2  | 54087028  | GPR75     | 0.721±0.196  | 1.28±0.856   | 4.12E-05 |
| cg20308817 | 19 | 51225848  | CLEC11A   | 0.675±0.276  | 1.154±0.71   | 4.13E-05 |
| cg24713204 | 19 | 57019373  | ZNF471    | -0.843±0.363 | -0.404±0.61  | 4.13E-05 |
| cg08958913 | 19 | 40193890  | LGALS14   | 1.585±0.196  | 1.196±0.584  | 4.14E-05 |
| cg06224510 | 10 | 7745454   | ITIH2     | 0.037±0.24   | -0.418±0.679 | 4.16E-05 |
| cg16607065 | 1  | 3607222   | TP73      | 1.596±0.473  | 1.066±0.718  | 4.16E-05 |
| cg22285621 | 11 | 67071322  | SSH3      | -2.36±1.182  | -1.269±1.331 | 4.17E-05 |
| cg08598221 | 8  | 121824929 | SNTB1     | 0.046±0.308  | -0.598±0.972 | 4.18E-05 |
| cg01200177 | 2  | 128616082 | POLR2D    | -0.926±0.381 | -1.384±0.636 | 4.18E-05 |
| cg01040850 | 1  | 181002669 | MR1       | 0.799±0.31   | 0.324±0.694  | 4.18E-05 |
| cg11822659 | 20 | 53092781  | DOK5      | -3.005±0.293 | -2.279±1.105 | 4.18E-05 |
| cg20083676 | 9  | 91605999  | C9orf47   | -1.3±0.4     | -0.655±0.949 | 4.18E-05 |
| cg25416372 | 19 | 10628014  | S1PR5     | -4.534±0.487 | -4.046±0.63  | 4.21E-05 |
| cg02921257 | 3  | 39233858  | XIRP1     | 1.405±0.236  | 1.094±0.441  | 4.21E-05 |
| cg21663722 | 20 | 26034952  | FAM182A   | 1.473±0.175  | 1.022±0.689  | 4.24E-05 |
| cg18920397 | 1  | 160765805 | LY9       | 1.017±0.32   | 0.498±0.765  | 4.24E-05 |
| cg06938878 | 11 | 15094364  | CALCB     | 3.017±0.378  | 2.426±0.866  | 4.25E-05 |
| cg13434852 | 10 | 128768181 | DOCK1     | 2.716±0.294  | 2.401±0.419  | 4.25E-05 |
| cg24058132 | 14 | 88459866  | GALC      | -1.09±0.203  | -1.443±0.524 | 4.25E-05 |
| cg21358381 | 17 | 42019637  | PPY       | 2.554±0.215  | 2.146±0.612  | 4.26E-05 |
| cg22820108 | 12 | 125003218 | NCOR2     | -0.694±0.304 | -0.298±0.562 | 4.28E-05 |
| cg05184394 | 2  | 131512773 | AMER3     | -0.403±0.298 | 0.09±0.728   | 4.28E-05 |
| cg03718677 | 1  | 151148266 | TMOD4     | 2.013±0.321  | 2.329±0.404  | 4.28E-05 |
| cg10364182 | 11 | 36615998  | C11orf74  | -3.403±0.481 | -2.904±0.654 | 4.28E-05 |
| cg00298357 | 5  | 148758791 | IL17B     | 2.829±0.257  | 2.527±0.418  | 4.28E-05 |
| cg17498321 | 19 | 15311304  | NOTCH3    | -3.84±0.577  | -3.256±0.756 | 4.30E-05 |
| cg03469082 | 4  | 46126448  | GABRG1    | -4.066±0.395 | -3.611±0.625 | 4.30E-05 |
| cg22737001 | 1  | 25257029  | RUNX3     | -4.091±0.339 | -2.831±1.948 | 4.30E-05 |
| cg00498604 | 4  | 166793789 | TLL1      | -2.991±0.374 | -2.096±1.364 | 4.30E-05 |
| cg17774418 | 6  | 6622864   | LY86-AS1  | 1.673±0.256  | 1.072±0.915  | 4.31E-05 |
| cg01252496 | 19 | 17326655  | USE1      | -0.42±0.176  | -0.135±0.422 | 4.33E-05 |
| cg02131995 | 19 | 35772917  | HAMP      | 0.414±0.308  | -0.215±0.95  | 4.34E-05 |
| cg21553524 | 2  | 39893185  | TMEM178A  | -5.605±0.781 | -4.417±1.739 | 4.35E-05 |
| cg12563178 | 10 | 20105641  | PLXDC2    | -4.184±0.781 | -3.124±1.52  | 4.36E-05 |
| cg06584407 | 1  | 11907324  | NPPA      | 2.557±0.174  | 2.384±0.224  | 4.39E-05 |
| cg19042062 | 17 | 68164784  | KCNJ2-AS1 | -4.133±0.449 | -3.199±1.413 | 4.39E-05 |
| cg01062029 | 9  | 94712909  | ROR2      | -4.951±0.32  | -4.125±1.264 | 4.40E-05 |
| cg14370448 | 16 | 30103978  | TBX6      | -3.272±0.3   | -3.819±0.819 | 4.41E-05 |
| cg14127659 | 22 | 38350784  | C22orf23  | 0.422±0.186  | 0.774±0.529  | 4.41E-05 |
| cg11563860 | 3  | 2141937   | CNTN4     | -1.543±0.246 | -1.106±0.652 | 4.41E-05 |
| cg02588309 | 5  | 40756462  | TTC33     | -1.511±0.295 | -2.013±0.747 | 4.41E-05 |
| cg26984805 | 10 | 71176501  | TACR2     | 1.478±0.319  | 1.87±0.549   | 4.41E-05 |
| cg13619408 | 1  | 109756118 | SARS      | -0.428±0.214 | -0.975±0.836 | 4.41E-05 |
| cg23514672 | 16 | 10788644  | TEKT5     | 3.67±0.348   | 3.184±0.701  | 4.42E-05 |
| cg06759890 | 5  | 77806538  | LHFPL2    | -0.839±0.28  | -0.395±0.654 | 4.42E-05 |
| cg27214365 | 4  | 144940612 | GYPB      | 2.181±0.163  | 1.727±0.698  | 4.44E-05 |
| cg24919972 | 3  | 46037608  | FYCO1     | -1.954±0.311 | -2.347±0.554 | 4.46E-05 |
| cg17133183 | 15 | 78632861  | CRABP1    | -5.088±0.686 | -3.953±1.684 | 4.49E-05 |
| cg06497752 | 20 | 61448534  | COL9A3    | -5.167±0.62  | -4.149±1.508 | 4.49E-05 |
| cg19781251 | 7  | 94294278  | PEG10     | 5.067±0.328  | 4.695±0.509  | 4.49E-05 |
| cg18638581 | 2  | 75059602  | HK2       | 0.913±0.274  | 0.327±0.89   | 4.51E-05 |
| cg13765303 | 3  | 112931390 | BOC       | -4.116±0.451 | -3.282±1.253 | 4.54E-05 |
| cg09204187 | 2  | 130940668 | SMPD4     | -0.251±0.253 | -0.711±0.691 | 4.55E-05 |
| cg08785534 | 11 | 68451827  | GAL       | -3.352±0.333 | -2.742±0.916 | 4.55E-05 |
| cg05380982 | 21 | 39288378  | KCNJ6     | -2.451±0.497 | -1.757±1.004 | 4.56E-05 |
| cg21012874 | 10 | 88718393  | SNCG      | -0.237±0.437 | 0.284±0.725  | 4.56E-05 |
| cg04113075 | 6  | 146865487 | RAB32     | -3.319±0.409 | -2.784±0.763 | 4.57E-05 |
| cg03097995 | 19 | 55669091  | TNNI3     | -0.911±0.371 | -0.419±0.704 | 4.58E-05 |
| cg00480115 | 19 | 35606877  | FXVD3     | 1.036±0.3    | 0.337±1.067  | 4.58E-05 |
| cg12428447 | 11 | 62753072  | SLC22A6   | 0.932±0.309  | 0.48±0.66    | 4.58E-05 |

|            |    |           |                    |              |              |          |
|------------|----|-----------|--------------------|--------------|--------------|----------|
| cg01144251 | 19 | 51514146  | <i>KLK9</i>        | 1.395±0.319  | 0.914±0.706  | 4.58E-05 |
| cg23208881 | 15 | 91411495  | <i>FURIN</i>       | 2.206±0.433  | 1.664±0.765  | 4.58E-05 |
| cg21142398 | 1  | 54200078  | <i>GLIS1</i>       | 1.606±0.398  | 1.037±0.826  | 4.60E-05 |
| cg08612037 | 12 | 107712210 | <i>BTBD11</i>      | -4.21±0.438  | -3.449±1.138 | 4.61E-05 |
| cg03777459 | 20 | 61051802  | <i>GATA5</i>       | -3.2±0.267   | -2.342±1.327 | 4.61E-05 |
| cg16706631 | 6  | 26204823  | <i>HIST1H4E</i>    | -3.684±0.561 | -2.546±1.724 | 4.62E-05 |
| cg16666160 | 9  | 127269631 | <i>NR5A1</i>       | 5.486±0.454  | 4.999±0.654  | 4.63E-05 |
| cg16772207 | 20 | 62795807  | <i>MYT1</i>        | 2.778±0.323  | 2.024±1.153  | 4.63E-05 |
| cg06007645 | 1  | 55107421  | <i>HEATR8-TTC4</i> | 1.639±0.3    | 1.209±0.624  | 4.63E-05 |
| cg14312526 | 3  | 138665291 | <i>FOXL2</i>       | -2.858±0.393 | -1.909±1.455 | 4.67E-05 |
| cg26723847 | 11 | 134095652 | <i>VPS26B</i>      | -3.709±0.488 | -3.058±0.935 | 4.68E-05 |
| cg23762517 | 1  | 42384310  | <i>HIVEP3</i>      | -2.527±0.519 | -1.959±0.769 | 4.69E-05 |
| cg11158374 | 21 | 43771664  | <i>TFF2</i>        | 1.705±0.212  | 1.274±0.654  | 4.71E-05 |
| cg21301148 | 14 | 23878195  | <i>MYH6</i>        | -0.865±0.182 | -1.219±0.535 | 4.71E-05 |
| cg03852570 | 10 | 100175106 | <i>PYROXD2</i>     | -2.29±0.475  | -1.758±0.727 | 4.71E-05 |
| cg08370996 | 15 | 96874031  | <i>NR2F2</i>       | -3.139±0.641 | -2.485±0.858 | 4.71E-05 |
| cg19125606 | 1  | 230850299 | <i>AGT</i>         | -0.066±0.305 | 0.471±0.806  | 4.74E-05 |
| cg00912942 | 1  | 11024484  | <i>C1orf127</i>    | 2.942±0.29   | 3.202±0.313  | 4.75E-05 |
| cg03580247 | 17 | 42345488  | <i>SLC4A1</i>      | 2.268±0.34   | 1.658±0.916  | 4.75E-05 |
| cg26093148 | 1  | 151690075 | <i>CELF3</i>       | -1.16±0.291  | -0.687±0.703 | 4.75E-05 |
| cg16792160 | 10 | 52008593  | <i>ASAH2</i>       | 0.901±0.259  | 0.411±0.739  | 4.75E-05 |
| cg16501028 | 11 | 32450000  | <i>WT1</i>         | -0.058±0.342 | 0.382±0.628  | 4.79E-05 |
| cg06186808 | 14 | 24600901  | <i>FITM1</i>       | 2.31±0.338   | 2.594±0.322  | 4.81E-05 |
| cg03086857 | 13 | 78492568  | <i>EDNRB</i>       | -2.896±0.477 | -2.12±1.154  | 4.82E-05 |
| cg19580810 | 1  | 156031182 | <i>RAB25</i>       | 0.283±0.227  | -0.314±0.92  | 4.82E-05 |
| cg07621456 | 3  | 128749537 | <i>EFCC1</i>       | 2.652±0.272  | 2.166±0.731  | 4.84E-05 |
| cg09565688 | 12 | 10161879  | <i>CLEC12B</i>     | 1.563±0.222  | 1.344±0.283  | 4.84E-05 |
| cg18942631 | 1  | 116311341 | <i>CASQ2</i>       | -0.125±0.249 | 0.236±0.528  | 4.84E-05 |
| cg16363586 | 19 | 17516329  | <i>BST2</i>        | -0.025±0.291 | -0.843±1.264 | 4.85E-05 |
| cg06812844 | 21 | 45773782  | <i>TRPM2</i>       | 1.257±0.267  | 0.636±0.953  | 4.85E-05 |
| cg07348311 | 2  | 163174896 | <i>IFIH1</i>       | -4.584±0.475 | -4.977±0.44  | 4.86E-05 |
| cg17860158 | 1  | 205012569 | <i>CNTN2</i>       | -2.351±0.263 | -1.839±0.776 | 4.88E-05 |
| cg21051046 | 7  | 155248393 | <i>0</i>           | -2.573±0.355 | -1.93±0.968  | 4.88E-05 |
| cg16434306 | 5  | 32788128  | <i>NPR3</i>        | 2.919±0.213  | 2.445±0.725  | 4.89E-05 |
| cg24505122 | 12 | 1726292   | <i>WNT5B</i>       | 2.582±0.322  | 2.176±0.577  | 4.90E-05 |
| cg21488617 | 1  | 38022586  | <i>DNALI1</i>      | -1.302±0.34  | -0.81±0.72   | 4.90E-05 |
| cg21171615 | 1  | 198607548 | <i>PTPRC</i>       | 1.206±0.322  | 0.711±0.731  | 4.91E-05 |
| cg00983520 | 22 | 51017067  | <i>CPT1B</i>       | -2.047±0.521 | -1.445±0.835 | 4.92E-05 |
| cg15083227 | 15 | 65133289  | <i>PLEKHO2</i>     | -3.304±0.395 | -2.804±0.711 | 4.93E-05 |
| cg20191453 | 3  | 49459855  | <i>AMT</i>         | 0.338±0.278  | 1.005±1.025  | 4.94E-05 |
| cg01777397 | 2  | 29337946  | <i>CLIP4</i>       | -3.07±0.44   | -3.701±0.924 | 4.98E-05 |
| cg04943986 | 15 | 96873868  | <i>NR2F2</i>       | -3.543±0.863 | -2.758±0.966 | 4.98E-05 |
| cg12438037 | 9  | 138393570 | <i>MRPS2</i>       | -0.218±0.19  | 0.171±0.593  | 4.99E-05 |
| cg08351331 | 20 | 36975083  | <i>LBP</i>         | 1.306±0.267  | 0.886±0.623  | 4.99E-05 |
| cg10994379 | 5  | 35939420  | <i>CAPSL</i>       | -0.861±0.313 | -1.328±0.688 | 5.00E-05 |
| cg23637791 | 15 | 76016262  | <i>ODF3L1</i>      | -3.209±0.212 | -2.941±0.382 | 5.03E-05 |
| cg02838877 | 13 | 97873877  | <i>MBNL2</i>       | -0.397±0.278 | -0.025±0.539 | 5.03E-05 |
| cg25598083 | 14 | 74034893  | <i>ACOT2</i>       | 0.525±0.316  | -0.034±0.841 | 5.05E-05 |
| cg17647273 | 22 | 24891452  | <i>UPB1</i>        | 2.779±0.187  | 2.453±0.491  | 5.09E-05 |
| cg18971671 | 19 | 49401721  | <i>TULP2</i>       | 2.215±0.265  | 1.902±0.438  | 5.09E-05 |
| cg27022827 | 19 | 3728751   | <i>TJP3</i>        | 0.298±0.22   | -0.091±0.586 | 5.10E-05 |
| cg26170660 | 6  | 28493601  | <i>GPX5</i>        | -1.391±0.319 | -1.993±0.913 | 5.13E-05 |
| cg05876918 | 12 | 57985234  | <i>PIP4K2C</i>     | -3.848±0.3   | -4.109±0.309 | 5.14E-05 |
| cg24628744 | 5  | 134735654 | <i>H2AFY</i>       | -0.801±0.329 | -0.219±0.878 | 5.15E-05 |
| cg16249711 | 14 | 55907501  | <i>TBPL2</i>       | 3.037±0.331  | 3.422±0.536  | 5.15E-05 |
| cg01857260 | 19 | 50666552  | <i>IZUMO2</i>      | -2.244±0.402 | -1.689±0.807 | 5.15E-05 |
| cg09305224 | 9  | 139927245 | <i>FUT7</i>        | 1.609±0.316  | 1.15±0.675   | 5.17E-05 |
| cg07051960 | 19 | 42499619  | <i>ATP1A3</i>      | 1.032±0.205  | 0.689±0.514  | 5.19E-05 |
| cg09965258 | 9  | 14313762  | <i>NFIB</i>        | -4.662±0.504 | -4.191±0.594 | 5.20E-05 |
| cg06800962 | 3  | 149096029 | <i>TM4SF1</i>      | -1.053±0.279 | -1.49±0.65   | 5.22E-05 |
| cg10714284 | 6  | 32908901  | <i>HLA-DMB</i>     | -4.037±0.363 | -4.392±0.461 | 5.24E-05 |
| cg25426743 | 7  | 27166103  | <i>HOXA3</i>       | 1.079±0.275  | 1.572±0.746  | 5.26E-05 |
| cg04473030 | 10 | 131354782 | <i>MGMT</i>        | 2.685±0.253  | 2.373±0.443  | 5.26E-05 |
| cg00476577 | 20 | 52200408  | <i>ZNF217</i>      | -3.395±0.416 | -3.819±0.562 | 5.30E-05 |
| cg18413900 | 12 | 58160989  | <i>CYP27B1</i>     | 0.83±0.235   | 0.339±0.753  | 5.32E-05 |
| cg15940569 | 15 | 27019356  | <i>GABRB3</i>      | -2.419±0.377 | -1.899±0.758 | 5.32E-05 |
| cg18858343 | 10 | 72972901  | <i>UNC5B</i>       | -4.589±0.436 | -4.062±0.744 | 5.33E-05 |

|            |    |           |                  |              |              |          |
|------------|----|-----------|------------------|--------------|--------------|----------|
| cg18303397 | 3  | 129160135 | <i>MBD4</i>      | -0.979±0.285 | -0.475±0.763 | 5.36E-05 |
| cg11902458 | 1  | 154842746 | <i>KCNN3</i>     | -3.121±0.445 | -2.354±1.157 | 5.37E-05 |
| cg26227005 | 1  | 50574517  | <i>ELAVL4</i>    | -0.075±0.282 | -0.718±0.992 | 5.39E-05 |
| cg10275770 | 17 | 62084205  | <i>ICAM2</i>     | -0.541±0.305 | 0.093±0.973  | 5.39E-05 |
| cg13984181 | 1  | 92495720  | <i>EPHX4</i>     | -3.59±0.493  | -2.928±0.962 | 5.42E-05 |
| cg20540428 | 3  | 73045686  | <i>PPP4R2</i>    | 0.37±0.525   | -0.113±0.603 | 5.43E-05 |
| cg13216057 | 11 | 12030643  | <i>DKK3</i>      | -4.198±0.751 | -3.429±1.024 | 5.45E-05 |
| cg24194132 | 11 | 368966    | <i>B4GALNT4</i>  | -3.749±0.525 | -3.152±0.831 | 5.45E-05 |
| cg09210315 | 20 | 61273055  | <i>SLCO4A1</i>   | -0.705±0.311 | -1.29±0.891  | 5.46E-05 |
| cg26747293 | 5  | 38258670  | <i>EGFLAM</i>    | -4.487±0.558 | -3.474±1.539 | 5.47E-05 |
| cg04689061 | 8  | 79427993  | <i>PKIA</i>      | -3.479±0.52  | -2.661±1.221 | 5.47E-05 |
| cg21578541 | 3  | 52260090  | <i>TLR9</i>      | 0.969±0.297  | 0.42±0.834   | 5.48E-05 |
| cg22915732 | 8  | 62200518  | <i>CLVS1</i>     | -3.577±0.407 | -2.96±0.916  | 5.48E-05 |
| cg13488201 | 10 | 128077323 | <i>ADAM12</i>    | -1.469±0.401 | -0.735±1.115 | 5.50E-05 |
| cg16405957 | 12 | 53045793  | <i>KRT2</i>      | 3.029±0.211  | 2.692±0.504  | 5.50E-05 |
| cg12564962 | 21 | 38377938  | <i>RIPPLY3</i>   | 2.538±0.253  | 2.786±0.323  | 5.50E-05 |
| cg21631409 | 11 | 67449882  | <i>ALDH3B2</i>   | -0.23±0.239  | -0.619±0.584 | 5.52E-05 |
| cg10145926 | 14 | 95875792  | <i>LINC00341</i> | 1.028±0.221  | 0.508±0.803  | 5.55E-05 |
| cg10000775 | 4  | 186456556 | <i>PDLIM3</i>    | -3.54±0.578  | -3.008±0.668 | 5.56E-05 |
| cg14963897 | 20 | 34288750  | <i>NFS1</i>      | 3.285±0.276  | 2.986±0.409  | 5.56E-05 |
| cg21130124 | 10 | 5542328   | <i>CALML5</i>    | 3.12±0.262   | 2.793±0.468  | 5.56E-05 |
| cg01664666 | 1  | 242687465 | <i>PLD5</i>      | -3.62±0.545  | -2.714±1.364 | 5.56E-05 |
| cg00350478 | 6  | 168480013 | <i>FRMD1</i>     | 0.515±0.189  | 0.188±0.495  | 5.58E-05 |
| cg12177677 | 2  | 158300475 | <i>CYTIP</i>     | 0.077±0.411  | -0.609±1.033 | 5.59E-05 |
| cg15427448 | 11 | 117186896 | <i>BACE1</i>     | -4.35±1.083  | -3.351±1.256 | 5.59E-05 |
| cg18972811 | 4  | 20254736  | <i>SLIT2</i>     | -2.57±0.638  | -1.759±1.167 | 5.59E-05 |
| cg13097816 | 2  | 241568439 | <i>GPR35</i>     | 0.086±0.317  | 0.568±0.719  | 5.60E-05 |
| cg05022306 | 12 | 54403254  | <i>HOXC8</i>     | -4.685±0.41  | -3.683±1.555 | 5.62E-05 |
| cg05369166 | 1  | 204797507 | <i>NFASC</i>     | -3.632±0.421 | -2.784±1.301 | 5.64E-05 |
| cg07035740 | 5  | 176057740 | <i>EIF4E1B</i>   | -4.058±0.307 | -3.004±1.655 | 5.65E-05 |
| cg13849691 | 10 | 114133304 | <i>ACSL5</i>     | 3.203±0.314  | 2.581±0.952  | 5.67E-05 |
| cg15700739 | 12 | 54427700  | <i>MIR615</i>    | -2.185±0.262 | -1.527±1.024 | 5.67E-05 |
| cg07501965 | 15 | 30685190  | <i>CHRFAM7A</i>  | -3.194±0.173 | -2.627±0.89  | 5.68E-05 |
| cg09632136 | 11 | 114165661 | <i>NNMT</i>      | -1.179±0.38  | -0.701±0.687 | 5.68E-05 |
| cg15125472 | 19 | 36248077  | <i>HSPB6</i>     | -1.711±0.319 | -1.17±0.817  | 5.68E-05 |
| cg04629204 | 1  | 26348325  | <i>EXTL1</i>     | -0.865±0.189 | -0.538±0.495 | 5.69E-05 |
| cg15926585 | 22 | 19928445  | <i>COMT</i>      | 2.194±0.208  | 1.574±0.97   | 5.70E-05 |
| cg08450982 | 19 | 41195910  | <i>NUMBL</i>     | 0.956±0.312  | 1.572±0.945  | 5.70E-05 |
| cg23776012 | 17 | 38821403  | <i>KRT222</i>    | -1.053±0.326 | -0.511±0.818 | 5.71E-05 |
| cg10242476 | 3  | 46619364  | <i>TDGF1</i>     | 0.01±0.355   | 0.418±0.573  | 5.71E-05 |
| cg05135156 | 1  | 184355420 | <i>C1orf21</i>   | -1.83±0.419  | -2.412±0.855 | 5.73E-05 |
| cg01185080 | 15 | 90543813  | <i>ZNF710</i>    | -0.672±0.398 | -0.195±0.677 | 5.73E-05 |
| cg25608041 | 4  | 37891834  | <i>TBC1D1</i>    | -0.35±0.334  | 0.091±0.64   | 5.74E-05 |
| cg07186138 | 22 | 39410396  | <i>APOBEC3C</i>  | -2.761±0.52  | -3.586±1.238 | 5.74E-05 |
| cg26511075 | 5  | 36301436  | <i>RANBP3L</i>   | 2.04±0.288   | 1.448±0.912  | 5.78E-05 |
| cg18598959 | 1  | 151298666 | <i>PI4KB</i>     | 0.641±0.248  | 1.214±0.888  | 5.79E-05 |
| cg10730712 | 5  | 178017827 | <i>COL23A1</i>   | -4.371±0.592 | -3.231±1.746 | 5.80E-05 |
| cg21289015 | 11 | 17566048  | <i>USH1C</i>     | -3.405±0.631 | -2.58±1.199  | 5.84E-05 |
| cg03243506 | 20 | 2517231   | <i>TMC2</i>      | 1.316±0.282  | 1.68±0.527   | 5.84E-05 |
| cg05832051 | 19 | 54369469  | <i>MYADM</i>     | -4.601±0.564 | -3.971±0.877 | 5.85E-05 |
| cg07935568 | 13 | 49794126  | <i>MLNR</i>      | -2.51±0.348  | -1.81±1.078  | 5.92E-05 |
| cg27303880 | 1  | 64240188  | <i>ROR1</i>      | -3.533±0.723 | -2.831±0.918 | 5.92E-05 |
| cg23886551 | 14 | 105992619 | <i>TMEM121</i>   | -4.872±0.607 | -3.949±1.379 | 5.94E-05 |
| cg11360149 | 5  | 180581315 | <i>OR2V2</i>     | 4.329±0.33   | 3.798±0.8    | 5.96E-05 |
| cg23983884 | 5  | 176900806 | <i>DBN1</i>      | -2.272±0.316 | -2±0.325     | 5.97E-05 |
| cg01560871 | 10 | 72545424  | <i>TBATA</i>     | 2.528±0.284  | 2.068±0.694  | 5.98E-05 |
| cg19096475 | 11 | 123066529 | <i>CLMP</i>      | -0.127±0.209 | 0.358±0.753  | 5.98E-05 |
| cg25533774 | 7  | 16505409  | <i>SOSTDC1</i>   | -2.212±0.311 | -1.502±1.102 | 5.98E-05 |
| cg18908499 | 1  | 247712237 | <i>GCSAML</i>    | 0.694±0.497  | 0.076±0.887  | 5.99E-05 |
| cg02981703 | 1  | 9005734   | <i>CA6</i>       | 2.444±0.286  | 2.026±0.621  | 5.99E-05 |
| cg03234661 | 14 | 70265290  | <i>SLC10A1</i>   | 1.981±0.274  | 2.366±0.568  | 6.01E-05 |
| cg23617760 | 16 | 84681507  | <i>KLHL36</i>    | 1.178±0.253  | 0.502±1.058  | 6.02E-05 |
| cg09037813 | 2  | 238599761 | <i>LRRFIP1</i>   | 0.887±0.309  | 0.218±1.037  | 6.04E-05 |
| cg18619398 | 20 | 57416506  | <i>GNAS</i>      | 0.316±0.116  | 0.528±0.324  | 6.04E-05 |
| cg17550582 | 20 | 45338652  | <i>SLC2A10</i>   | -4.933±0.589 | -4.053±1.314 | 6.05E-05 |
| cg17348429 | 17 | 77705081  | <i>ENPP7</i>     | 2.287±0.485  | 1.824±0.598  | 6.05E-05 |
| cg13316424 | 9  | 130968009 | <i>CIZ1</i>      | 1.984±0.176  | 1.602±0.591  | 6.06E-05 |

|            |    |           |                  |              |              |          |
|------------|----|-----------|------------------|--------------|--------------|----------|
| cg18884137 | 17 | 7348490   | <i>CHRNA1</i>    | -2.982±0.286 | -3.399±0.619 | 6.06E-05 |
| cg15780361 | 2  | 202484098 | <i>ALS2CR11</i>  | -0.557±0.294 | -0.054±0.765 | 6.07E-05 |
| cg06281795 | 8  | 91095114  | <i>CALB1</i>     | -5.241±0.514 | -4.382±1.303 | 6.07E-05 |
| cg11134443 | 2  | 143635318 | <i>KYNU</i>      | 0.817±0.307  | 0.353±0.694  | 6.08E-05 |
| cg21755709 | 21 | 45149398  | <i>PDXK</i>      | 0.258±0.322  | 0.677±0.61   | 6.08E-05 |
| cg27337148 | 1  | 209756976 | <i>CAMK1G</i>    | -1.734±0.272 | -1.328±0.607 | 6.10E-05 |
| cg10876928 | 20 | 43977473  | <i>SDC4</i>      | -0.536±0.227 | -0.941±0.618 | 6.15E-05 |
| cg08090772 | 8  | 67344640  | <i>ADHFE1</i>    | -4.267±0.519 | -3.346±1.406 | 6.15E-05 |
| cg06110728 | 12 | 45270886  | <i>NELL2</i>     | -4.181±0.467 | -3.234±1.462 | 6.16E-05 |
| cg12163490 | 16 | 65155841  | <i>CDH11</i>     | -2.399±0.824 | -1.488±1.267 | 6.19E-05 |
| cg06048973 | 15 | 35088107  | <i>ACTC1</i>     | 0.597±0.279  | 0.968±0.543  | 6.19E-05 |
| cg05554718 | 6  | 26235699  | <i>HIST1H1D</i>  | -0.133±0.227 | -0.628±0.769 | 6.21E-05 |
| cg16799087 | 16 | 90128361  | <i>PRDM7</i>     | 1.736±0.329  | 1.2±0.811    | 6.21E-05 |
| cg20879768 | 18 | 44562136  | <i>TCEB3B</i>    | 2.32±0.335   | 1.956±0.503  | 6.22E-05 |
| cg15750705 | 1  | 35226707  | <i>GJB4</i>      | 3.156±0.222  | 2.637±0.809  | 6.23E-05 |
| cg08244028 | 5  | 79949339  | <i>MSH3</i>      | 1.34±0.276   | 0.857±0.737  | 6.23E-05 |
| cg06852652 | 10 | 96442031  | <i>CYP2C18</i>   | 2.252±0.18   | 1.748±0.792  | 6.23E-05 |
| cg08008233 | 18 | 44557819  | <i>TCEB3C</i>    | 1.226±0.368  | 0.888±0.428  | 6.27E-05 |
| cg19335327 | 19 | 57351642  | <i>PEG3</i>      | 0.034±0.153  | 0.335±0.464  | 6.29E-05 |
| cg19110684 | 5  | 156536955 | <i>HAVCR2</i>    | -0.511±0.278 | -0.989±0.729 | 6.29E-05 |
| cg02916816 | 14 | 24047021  | <i>JPH4</i>      | -3.103±0.47  | -2.399±1.055 | 6.29E-05 |
| cg16466334 | 11 | 102714358 | <i>MMP3</i>      | 1.858±0.242  | 1.39±0.721   | 6.29E-05 |
| cg16648841 | 1  | 57320685  | <i>C8A</i>       | 1.252±0.264  | 0.7±0.854    | 6.30E-05 |
| cg07360692 | 4  | 106066952 | <i>TET2</i>      | -1.377±0.418 | -1.961±0.866 | 6.31E-05 |
| cg05055150 | 19 | 35783292  | <i>MAG</i>       | 1.1±0.217    | 0.765±0.505  | 6.31E-05 |
| cg26637069 | 11 | 57004294  | <i>APLN</i>      | 1.043±0.32   | 1.403±0.504  | 6.33E-05 |
| cg05279864 | 7  | 87109319  | <i>0</i>         | 1.405±0.216  | 0.866±0.844  | 6.34E-05 |
| cg25550573 | 4  | 121994288 | <i>NDNF</i>      | -4.191±0.505 | -3.328±1.316 | 6.35E-05 |
| cg02741177 | 4  | 71263061  | <i>PROL1</i>     | 0.731±0.194  | 0.298±0.674  | 6.35E-05 |
| cg06206628 | 10 | 49482826  | <i>FRMPD2</i>    | 0.77±0.256   | 1.132±0.538  | 6.36E-05 |
| cg15544036 | 7  | 73245564  | <i>CLDN4</i>     | 0.829±0.245  | 0.4±0.657    | 6.38E-05 |
| cg03743584 | 10 | 135160908 | <i>PRAP1</i>     | -2.136±0.44  | -1.547±0.866 | 6.39E-05 |
| cg13950558 | 19 | 45683263  | <i>BLOC1S3</i>   | 1.079±0.205  | 0.597±0.754  | 6.40E-05 |
| cg21210758 | 4  | 5713005   | <i>EVC</i>       | -2.792±0.511 | -2.162±0.908 | 6.40E-05 |
| cg27416067 | 1  | 67773128  | <i>IL12RB2</i>   | -4.352±0.374 | -3.527±1.285 | 6.42E-05 |
| cg16682903 | 2  | 158694670 | <i>ACVR1</i>     | -1.235±0.327 | -0.614±0.957 | 6.44E-05 |
| cg15945602 | 17 | 41175317  | <i>VAT1</i>      | 1.644±0.231  | 1.462±0.2    | 6.46E-05 |
| cg21270015 | 4  | 113567813 | <i>LARP7</i>     | 1.529±0.326  | 1.856±0.439  | 6.48E-05 |
| cg25946758 | 10 | 60936025  | <i>PHYHIP</i>    | -3.087±0.319 | -2.541±0.834 | 6.50E-05 |
| cg05769169 | 14 | 34419832  | <i>EGLN3</i>     | -4.105±0.619 | -3.191±1.368 | 6.51E-05 |
| cg19953406 | 19 | 51487360  | <i>KLK7</i>      | -3.367±0.441 | -2.613±1.15  | 6.51E-05 |
| cg03875195 | 2  | 27486363  | <i>SLC30A3</i>   | -2.71±0.247  | -2.283±0.653 | 6.51E-05 |
| cg16519742 | 19 | 57306847  | <i>ZIM2</i>      | 1.394±0.358  | 1.746±0.468  | 6.52E-05 |
| cg15077070 | 2  | 102803290 | <i>IL1RL2</i>    | -0.318±0.333 | -0.93±0.941  | 6.53E-05 |
| cg11953824 | 9  | 111697545 | <i>FAM206A</i>   | 0.923±0.183  | 0.528±0.616  | 6.54E-05 |
| cg00691625 | 9  | 127269807 | <i>NR5A1</i>     | 2.426±0.328  | 2.019±0.589  | 6.56E-05 |
| cg23519969 | 3  | 39371797  | <i>CCR8</i>      | 2.692±0.24   | 2.358±0.496  | 6.57E-05 |
| cg15105703 | 15 | 45421860  | <i>DUOX1</i>     | -3.012±0.445 | -2.471±0.78  | 6.57E-05 |
| cg17687962 | 19 | 51358244  | <i>KLK3</i>      | 0.591±0.219  | 0.225±0.559  | 6.57E-05 |
| cg26713220 | 16 | 15528565  | <i>C16orf45</i>  | -5.291±0.482 | -4.53±1.151  | 6.58E-05 |
| cg20938689 | 5  | 85913915  | <i>COX7C</i>     | -0.755±0.274 | -0.515±0.295 | 6.58E-05 |
| cg06196379 | 6  | 41254885  | <i>TREM1</i>     | -0.94±0.262  | -1.352±0.623 | 6.61E-05 |
| cg22901840 | 1  | 68512777  | <i>DIRAS3</i>    | 0.796±0.153  | 1.134±0.526  | 6.61E-05 |
| cg14967066 | 11 | 314341    | <i>IFITM1</i>    | -1.771±0.426 | -2.442±1.016 | 6.62E-05 |
| cg13685294 | 3  | 51743318  | <i>GRM2</i>      | 3.67±0.372   | 3.178±0.723  | 6.62E-05 |
| cg16540259 | 10 | 75572220  | <i>NDST2</i>     | 2.247±0.225  | 1.939±0.456  | 6.63E-05 |
| cg25351036 | 4  | 48018582  | <i>NIPAL1</i>    | -4.041±0.253 | -4.261±0.271 | 6.64E-05 |
| cg11961618 | 11 | 2951844   | <i>PHLDA2</i>    | -4.244±0.296 | -4.534±0.385 | 6.65E-05 |
| cg02955504 | 18 | 77749374  | <i>TXNL4A</i>    | 1.745±0.4    | 1.157±0.882  | 6.65E-05 |
| cg16175792 | 1  | 120050104 | <i>HSD3B1</i>    | 0.239±0.254  | -0.3±0.839   | 6.65E-05 |
| cg00687674 | 15 | 69373260  | <i>LINC00277</i> | 0.03±0.299   | -0.439±0.711 | 6.67E-05 |
| cg27246571 | 12 | 96389588  | <i>HAL</i>       | 3.73±0.57    | 2.875±1.287  | 6.69E-05 |
| cg25697314 | 12 | 68619556  | <i>IL26</i>      | 1.207±0.214  | 0.672±0.84   | 6.70E-05 |
| cg22625415 | 5  | 52084413  | <i>ITGA1</i>     | -4.226±0.521 | -3.781±0.536 | 6.70E-05 |
| cg17741572 | 6  | 31914305  | <i>CFB</i>       | 1.498±0.396  | 0.878±0.939  | 6.71E-05 |
| cg15824056 | 6  | 158402261 | <i>SYNJ2</i>     | -0.935±0.24  | -1.585±1.025 | 6.73E-05 |
| cg11301598 | 12 | 121476792 | <i>OASL</i>      | -4.533±0.343 | -4.826±0.354 | 6.73E-05 |

|            |    |           |              |              |              |          |
|------------|----|-----------|--------------|--------------|--------------|----------|
| cg26851374 | 1  | 57432150  | C8B          | 2.465±0.28   | 2.076±0.578  | 6.74E-05 |
| cg02192965 | 2  | 44502740  | SLC3A1       | 1.391±0.304  | 0.875±0.79   | 6.76E-05 |
| cg24022301 | 1  | 78956570  | PTGFR        | -3.365±0.459 | -2.722±0.958 | 6.79E-05 |
| cg22807700 | 1  | 94345672  | DNTTIP2      | 1.496±0.346  | 1.019±0.709  | 6.81E-05 |
| cg01126560 | 9  | 139886304 | C9orf142     | -0.114±0.263 | -0.531±0.632 | 6.82E-05 |
| cg00116234 | 9  | 18474243  | ADAMTSL1     | -3.747±0.433 | -2.844±1.407 | 6.83E-05 |
| cg24892510 | 19 | 53636309  | ZNF415       | -3.931±0.506 | -3.261±0.988 | 6.83E-05 |
| cg22534509 | 12 | 123215119 | HCAR1        | -0.815±0.286 | -1.317±0.771 | 6.84E-05 |
| cg17296078 | 10 | 99259721  | UBTD1        | -2.341±0.542 | -1.639±1.03  | 6.87E-05 |
| cg22972055 | 7  | 872293    | SUN1         | 0.78±0.346   | 0.143±0.982  | 6.87E-05 |
| cg06765947 | 3  | 126236742 | UROC1        | 2.579±0.23   | 2.202±0.575  | 6.87E-05 |
| cg16155702 | 19 | 49260210  | FGF21        | 1.852±0.296  | 1.431±0.629  | 6.88E-05 |
| cg02945646 | 14 | 24037169  | AP1G2        | -2.286±0.397 | -2.653±0.472 | 6.89E-05 |
| cg02104644 | 11 | 61347820  | SYT7         | -2.624±0.37  | -2.12±0.748  | 6.97E-05 |
| cg10307548 | 4  | 24795830  | SOD3         | 1.289±0.405  | 0.793±0.718  | 6.99E-05 |
| cg11916609 | 2  | 102927488 | IL1RL1       | 0.722±0.278  | 0.171±0.856  | 6.99E-05 |
| cg19346193 | 10 | 127513190 | BCCIP        | 1.909±0.274  | 1.265±1.013  | 6.99E-05 |
| cg04189838 | 10 | 96523347  | CYP2C19      | 2.503±0.209  | 2.232±0.397  | 6.99E-05 |
| cg13694867 | 21 | 38072100  | SIM2         | -4.159±0.769 | -3.141±1.503 | 7.00E-05 |
| cg12629325 | 5  | 140306458 | PCDHAC1      | -3.486±0.771 | -2.687±1.095 | 7.00E-05 |
| cg14558138 | 10 | 92680510  | ANKRD1       | 1.836±0.205  | 1.467±0.57   | 7.02E-05 |
| cg07008386 | 20 | 8113630   | PLCB1        | -4.45±0.488  | -3.63±1.256  | 7.02E-05 |
| cg02001410 | 5  | 71403045  | MAP1B        | -3.487±0.507 | -2.79±1.037  | 7.02E-05 |
| cg06602857 | 16 | 86542807  | FENDRR       | -4.709±0.334 | -3.838±1.377 | 7.04E-05 |
| cg13379763 | 2  | 219892516 | CCDC108      | 1.609±0.246  | 1.183±0.655  | 7.08E-05 |
| cg01151699 | 22 | 37099259  | CACNG2       | -4.576±0.46  | -3.967±0.9   | 7.08E-05 |
| cg25599211 | 11 | 74023050  | P4HA3        | 1.048±0.2    | 1.374±0.498  | 7.08E-05 |
| cg16158807 | 9  | 95946891  | WNK2         | -2.929±0.371 | -2.377±0.834 | 7.10E-05 |
| cg18809535 | 15 | 59498670  | LDHAL6B      | 2.66±0.187   | 2.49±0.217   | 7.12E-05 |
| cg06201642 | 1  | 77333198  | ST6GALNAC5   | -4.058±0.263 | -3.404±1.033 | 7.16E-05 |
| cg00240312 | 16 | 68771514  | CDH1         | -3.717±0.825 | -2.906±1.087 | 7.21E-05 |
| cg00666746 | 19 | 15217781  | SYDE1        | -2.223±0.471 | -1.65±0.832  | 7.21E-05 |
| cg04541607 | 22 | 27013978  | CRYBB1       | 0.913±0.297  | 0.366±0.848  | 7.22E-05 |
| cg26374101 | 9  | 140500813 | ARRDC1       | -4.031±0.324 | -4.349±0.426 | 7.23E-05 |
| cg13162577 | 11 | 6226437   | C11orf42     | 2.744±0.27   | 2.445±0.42   | 7.27E-05 |
| cg19208681 | 17 | 56769628  | TEX14        | 0.35±0.379   | -0.207±0.84  | 7.30E-05 |
| cg04329454 | 6  | 33561099  | LINC00336    | 0.056±0.191  | -0.39±0.704  | 7.31E-05 |
| cg02590345 | 9  | 103790959 | LPPR1        | -2.99±0.474  | -2.422±0.822 | 7.31E-05 |
| cg04297093 | 21 | 31864374  | KRTAP19-3    | 1.34±0.308   | 0.773±0.88   | 7.34E-05 |
| cg24448259 | 7  | 29186110  | CPVL         | -4.52±0.546  | -3.612±1.393 | 7.35E-05 |
| cg03138668 | 19 | 49944488  | SLC17A7      | -3.961±0.348 | -3.347±0.949 | 7.35E-05 |
| cg25808906 | 3  | 186080023 | DGKG         | -4.39±0.254  | -3.685±1.12  | 7.37E-05 |
| cg09326702 | 11 | 64323448  | SLC22A11     | 2.599±0.236  | 2.084±0.809  | 7.41E-05 |
| cg26410550 | 15 | 25229256  | PWAR5        | 0.726±0.253  | 0.391±0.497  | 7.43E-05 |
| cg20688340 | 10 | 127464237 | MMP21        | 2.879±0.282  | 2.383±0.766  | 7.43E-05 |
| cg14972271 | 1  | 223899736 | CAPN2        | -1.061±0.279 | -1.479±0.633 | 7.46E-05 |
| cg16722118 | 7  | 143599982 | FAM115A      | 2.372±0.275  | 2.058±0.448  | 7.46E-05 |
| cg11011938 | 5  | 9545976   | SEMA5A       | -3.161±0.563 | -2.319±1.278 | 7.47E-05 |
| cg24816455 | 3  | 50310766  | SEMA3B       | -0.661±0.327 | -1.435±1.221 | 7.47E-05 |
| cg10977115 | 11 | 122709471 | CRTAM        | 1.149±0.362  | 0.788±0.489  | 7.53E-05 |
| cg01920829 | 2  | 219824761 | CDK5R2       | -1.343±0.201 | -0.852±0.778 | 7.55E-05 |
| cg02205739 | 9  | 132427570 | PRRX2        | -5.03±0.499  | -4.116±1.419 | 7.56E-05 |
| cg05294455 | 17 | 45286609  | MYL4         | 2.306±0.298  | 1.826±0.736  | 7.56E-05 |
| cg11159299 | 19 | 543432    | GZMM         | 1.171±0.217  | 0.886±0.422  | 7.56E-05 |
| cg26608667 | 7  | 1196370   | ZFAND2A      | 2.669±0.328  | 1.8±1.379    | 7.56E-05 |
| cg24653181 | 15 | 90039582  | RHCG         | -3.469±0.402 | -2.573±1.412 | 7.58E-05 |
| cg07512517 | 7  | 38408106  | LOC100506776 | -0.774±0.363 | -1.215±0.643 | 7.58E-05 |
| cg00986320 | 5  | 156695551 | CYFIP2       | 2.351±0.293  | 2.09±0.331   | 7.62E-05 |
| cg12970084 | 1  | 201977080 | 0            | 0.209±0.255  | -0.334±0.853 | 7.62E-05 |
| cg10332700 | 19 | 53636077  | ZNF415       | -4.674±0.821 | -3.65±1.503  | 7.68E-05 |
| cg17356181 | 14 | 50999707  | ATL1         | -4.871±0.366 | -5.189±0.395 | 7.68E-05 |
| cg20083730 | 16 | 56659724  | MT1E         | -4.43±0.52   | -3.585±1.297 | 7.68E-05 |
| cg12038710 | 8  | 95220583  | CDH17        | 2.517±0.134  | 2.051±0.747  | 7.70E-05 |
| cg23579062 | 9  | 34457500  | FAM219A      | 0.427±0.229  | 0.767±0.517  | 7.70E-05 |
| cg27035806 | 5  | 175817338 | 0            | 3.027±0.27   | 2.456±0.897  | 7.75E-05 |
| cg18904346 | 9  | 126773656 | LHX2         | -3.389±0.373 | -2.501±1.406 | 7.75E-05 |
| cg15875314 | 5  | 55035197  | DDX4         | 0.573±0.219  | 0.189±0.596  | 7.76E-05 |

|            |    |           |                |              |              |          |
|------------|----|-----------|----------------|--------------|--------------|----------|
| cg01775265 | 20 | 31780882  | <i>BPIFA4P</i> | -0.68±0.298  | -0.181±0.769 | 7.80E-05 |
| cg03113824 | 19 | 48807322  | <i>CCDC114</i> | 2.752±0.216  | 2.494±0.375  | 7.81E-05 |
| cg27345534 | 12 | 11509583  | <i>PRB1</i>    | 0.268±0.319  | -0.195±0.701 | 7.84E-05 |
| cg27276456 | 19 | 58180770  | <i>ZSCAN4</i>  | 3.625±0.289  | 3.221±0.607  | 7.86E-05 |
| cg09997082 | 19 | 46170946  | <i>GIPR</i>    | -0.475±0.215 | -0.903±0.656 | 7.87E-05 |
| cg13877895 | 2  | 69201009  | <i>GKN1</i>    | 2.593±0.28   | 2.116±0.738  | 7.87E-05 |
| cg01726775 | 12 | 7261710   | <i>C1RL</i>    | -5.009±0.374 | -5.321±0.375 | 7.89E-05 |
| cg00995327 | 3  | 142838847 | <i>CHST2</i>   | -3.594±0.246 | -2.844±1.2   | 7.90E-05 |
| cg16469386 | 12 | 46662743  | <i>SLC38A1</i> | -5.266±0.62  | -5.751±0.539 | 7.91E-05 |
| cg17501569 | 16 | 811064    | <i>MSLN</i>    | 1.627±0.369  | 1.102±0.794  | 7.93E-05 |
| cg03025569 | 17 | 15586426  | <i>TRIM16</i>  | 1.621±0.244  | 1.251±0.564  | 7.93E-05 |
| cg02537023 | 7  | 74588054  | <i>NCF1C</i>   | 1.224±0.378  | 0.786±0.631  | 7.93E-05 |
| cg04278905 | 17 | 40273815  | <i>KAT2A</i>   | 2.964±0.249  | 2.603±0.547  | 7.98E-05 |
| cg13067215 | 16 | 67427285  | <i>TPPP3</i>   | -3.077±0.451 | -2.572±0.72  | 7.99E-05 |
| cg11171719 | 3  | 37903684  | <i>CTDSPL</i>  | -3.922±1.114 | -2.958±1.198 | 8.00E-05 |
| cg22892904 | 17 | 77751089  | <i>CBX2</i>    | -0.799±0.21  | -0.252±0.871 | 8.03E-05 |
| cg04698187 | 1  | 204654145 | <i>LRRN2</i>   | -3.707±0.411 | -3.057±0.999 | 8.04E-05 |
| cg11220060 | 19 | 12997418  | <i>KLF1</i>    | -0.662±0.283 | -0.175±0.755 | 8.05E-05 |
| cg22266967 | 4  | 6695698   | <i>S100P</i>   | 1.449±0.294  | 0.719±1.162  | 8.06E-05 |
| cg15423764 | 11 | 58499533  | <i>GLYAT</i>   | 0.619±0.249  | 0.201±0.647  | 8.08E-05 |
| cg18834029 | 10 | 103349097 | <i>DPCD</i>    | 3.005±0.233  | 2.5±0.798    | 8.09E-05 |
| cg09863066 | 22 | 37214864  | <i>PVALB</i>   | 0.041±0.159  | -0.36±0.638  | 8.09E-05 |
| cg05820087 | 3  | 193272561 | <i>ATP13A4</i> | -0.098±0.277 | -0.688±0.931 | 8.09E-05 |
| cg12531542 | 11 | 75429059  | <i>MOGAT2</i>  | 2.662±0.218  | 2.163±0.79   | 8.10E-05 |
| cg17386181 | 16 | 56685902  | <i>MT1B</i>    | 1.962±0.249  | 1.607±0.538  | 8.16E-05 |
| cg03993463 | 21 | 39627271  | <i>KCNJ15</i>  | 2.411±0.369  | 1.924±0.727  | 8.16E-05 |
| cg06595693 | 15 | 40649989  | <i>DISP2</i>   | -1.615±0.303 | -1.16±0.695  | 8.16E-05 |
| cg25870263 | 1  | 33335831  | <i>FNDC5</i>   | -0.311±0.144 | -0.036±0.431 | 8.18E-05 |
| cg25202471 | 6  | 10415540  | <i>TFAP2A</i>  | -2.404±0.315 | -1.76±1.015  | 8.18E-05 |
| cg22620680 | 3  | 122920514 | <i>SEC22A</i>  | -3.548±0.163 | -3.678±0.149 | 8.19E-05 |
| cg10676060 | 9  | 135546789 | <i>DDX31</i>   | -1.599±0.257 | -1.269±0.49  | 8.22E-05 |
| cg18396533 | 10 | 82116208  | <i>DYDC1</i>   | -1.275±0.297 | -0.686±0.925 | 8.23E-05 |
| cg10322876 | 19 | 41496749  | <i>CYP2B6</i>  | 2.007±0.217  | 1.623±0.598  | 8.23E-05 |
| cg18129786 | 3  | 44519983  | <i>ZNF445</i>  | 3.362±0.241  | 2.978±0.592  | 8.23E-05 |
| cg05847038 | 8  | 24298771  | <i>ADAM7</i>   | 0.78±0.279   | 0.302±0.742  | 8.24E-05 |
| cg19296958 | 13 | 48891270  | <i>RB1</i>     | 2.354±0.257  | 2.577±0.28   | 8.25E-05 |
| cg19006008 | 19 | 16999768  | <i>F2RL3</i>   | -3.459±0.457 | -2.532±1.461 | 8.25E-05 |
| cg23817637 | 10 | 129691429 | <i>CLRN3</i>   | 1.211±0.293  | 0.815±0.595  | 8.25E-05 |
| cg27039606 | 19 | 36305049  | <i>PRODH2</i>  | 2.041±0.179  | 1.627±0.658  | 8.26E-05 |
| cg09582042 | 13 | 95253676  | <i>GPR180</i>  | -1.504±0.373 | -0.992±0.771 | 8.30E-05 |
| cg04144768 | 7  | 50628154  | <i>DDC</i>     | 1.623±0.186  | 1.322±0.465  | 8.31E-05 |
| cg27318281 | 18 | 33078719  | <i>INO80C</i>  | 2.477±0.134  | 2.13±0.554   | 8.31E-05 |
| cg00819310 | 1  | 116193783 | <i>VANGL1</i>  | 2.493±0.21   | 2.037±0.721  | 8.31E-05 |
| cg01136458 | 8  | 4853275   | <i>CSMD1</i>   | -0.535±0.344 | -0.942±0.593 | 8.32E-05 |
| cg19136075 | 1  | 19968885  | <i>NBL1</i>    | 0.99±0.234   | 0.675±0.473  | 8.33E-05 |
| cg02540157 | 7  | 99816814  | <i>PVRIG</i>   | 1.571±0.189  | 1.358±0.305  | 8.33E-05 |
| cg01713938 | 9  | 21368292  | <i>IFNA13</i>  | 1.686±0.281  | 1.373±0.447  | 8.35E-05 |
| cg13894021 | 22 | 23487383  | <i>RAB36</i>   | -3.095±0.374 | -3.398±0.355 | 8.39E-05 |
| cg16950616 | 17 | 53045046  | <i>COX11</i>   | -2.588±0.229 | -2.801±0.279 | 8.41E-05 |
| cg23922708 | 18 | 78005180  | <i>PARD6G</i>  | -3.896±0.878 | -3.083±1.07  | 8.45E-05 |
| cg21696393 | 16 | 1030401   | <i>LMF1</i>    | -1.578±0.215 | -0.893±1.103 | 8.46E-05 |
| cg26556719 | 5  | 140261810 | <i>PCDHA13</i> | -2.349±0.348 | -1.708±1.003 | 8.47E-05 |
| cg00575744 | 6  | 32908642  | <i>HLA-DMB</i> | -2.991±0.391 | -3.43±0.631  | 8.48E-05 |
| cg06542614 | 10 | 97051255  | <i>PDLIM1</i>  | 0.761±0.276  | 0.346±0.637  | 8.48E-05 |
| cg09058542 | 1  | 115572863 | <i>TSHB</i>    | 2.452±0.301  | 2.039±0.622  | 8.48E-05 |
| cg27227797 | 19 | 375831    | <i>THEG</i>    | 0.685±0.173  | 0.96±0.424   | 8.49E-05 |
| cg25600236 | 4  | 71091212  | <i>FDCSP</i>   | 1.168±0.321  | 0.681±0.737  | 8.51E-05 |
| cg06088032 | 3  | 50383227  | <i>ZMYND10</i> | -1.431±0.787 | -2.536±1.674 | 8.51E-05 |
| cg07654934 | 3  | 158390329 | <i>LXN</i>     | -3.971±0.422 | -3.129±1.328 | 8.51E-05 |
| cg20919133 | 7  | 152134133 | <i>FABP5P3</i> | -4.071±0.547 | -3.436±0.922 | 8.51E-05 |
| cg14072120 | 22 | 37640402  | <i>RAC2</i>    | -3.196±0.307 | -3.704±0.787 | 8.51E-05 |
| cg22392276 | 14 | 103988476 | <i>CKB</i>     | -3.817±0.428 | -3.463±0.424 | 8.58E-05 |
| cg07070934 | 1  | 35258435  | <i>GJA4</i>    | -3.953±0.428 | -3.414±0.799 | 8.61E-05 |
| cg08132931 | 2  | 70994962  | <i>ADD2</i>    | -4.445±0.35  | -3.348±1.767 | 8.63E-05 |
| cg25741452 | 12 | 88974161  | <i>KITLG</i>   | -3.395±0.921 | -2.544±1.121 | 8.64E-05 |
| cg21672276 | 3  | 44754072  | <i>ZNF502</i>  | -3.37±0.389  | -2.735±0.984 | 8.65E-05 |
| cg18176712 | 4  | 671489    | <i>MYL5</i>    | 0.969±0.115  | 0.719±0.398  | 8.67E-05 |

|            |    |           |                 |              |              |          |
|------------|----|-----------|-----------------|--------------|--------------|----------|
| cg11657615 | 16 | 67449861  | <i>ZDHH1</i>    | -3.422±0.432 | -2.828±0.898 | 8.67E-05 |
| cg13496838 | 2  | 223164747 | <i>PAX3</i>     | -2.645±0.211 | -2.122±0.837 | 8.67E-05 |
| cg23211240 | 11 | 111383624 | <i>MIR34B</i>   | -2.022±0.566 | -1.335±1.01  | 8.68E-05 |
| cg27601582 | 19 | 3933195   | <i>NMRK2</i>    | -4.123±0.488 | -3.249±1.368 | 8.69E-05 |
| cg05593325 | 9  | 101569696 | <i>GALNT12</i>  | -1.375±0.214 | -1.889±0.82  | 8.69E-05 |
| cg12424907 | 12 | 11151522  | <i>TAS2R20</i>  | 3.813±0.295  | 3.524±0.392  | 8.70E-05 |
| cg21472642 | 7  | 29233468  | <i>CHN2</i>     | 0.711±0.239  | 0.097±0.985  | 8.74E-05 |
| cg05724065 | 7  | 56160528  | <i>PHKG1</i>    | -1.279±0.437 | -0.664±0.934 | 8.74E-05 |
| cg07207789 | 16 | 84852909  | <i>CRISPLD2</i> | 0.157±0.311  | -0.396±0.865 | 8.82E-05 |
| cg19056418 | 17 | 76127217  | <i>TMC8</i>     | 1.234±0.362  | 0.691±0.832  | 8.82E-05 |
| cg01639256 | 2  | 70189903  | <i>ASPRV1</i>   | 3.349±0.272  | 3.074±0.38   | 8.82E-05 |
| cg02254461 | 3  | 39195904  | <i>CSRNP1</i>   | 0.407±0.401  | 1.043±0.984  | 8.84E-05 |
| cg09606564 | 17 | 19290353  | <i>MFAP4</i>    | -1.866±0.299 | -1.403±0.715 | 8.84E-05 |
| cg13424229 | 3  | 148581837 | <i>CPA3</i>     | 1.088±0.359  | 0.603±0.733  | 8.85E-05 |
| cg19394737 | 2  | 219892361 | <i>CCDC108</i>  | 4.795±0.375  | 4.128±1.046  | 8.86E-05 |
| cg02194878 | 1  | 22890278  | <i>EPHA8</i>    | -2.86±0.777  | -2.004±1.226 | 8.87E-05 |
| cg14613546 | 9  | 16729103  | <i>BNC2</i>     | 1.43±0.29    | 0.997±0.651  | 8.87E-05 |
| cg16778903 | 15 | 72612567  | <i>CELF6</i>    | -4.333±0.469 | -4.754±0.544 | 8.88E-05 |
| cg03044435 | 4  | 1144077   | <i>0</i>        | 2.036±0.258  | 1.562±0.745  | 8.90E-05 |
| cg17677397 | 17 | 72543519  | <i>CD300C</i>   | 1.372±0.271  | 0.91±0.722   | 8.91E-05 |
| cg06244906 | 19 | 57307081  | <i>ZIM2</i>     | 0.926±0.308  | 0.419±0.789  | 8.91E-05 |
| cg05248781 | 1  | 152483199 | <i>LCE5A</i>    | 3.004±0.224  | 2.455±0.879  | 8.92E-05 |
| cg25692621 | 7  | 95115163  | <i>ASB4</i>     | -0.821±0.366 | -0.173±1.016 | 8.96E-05 |
| cg11979959 | 20 | 46414900  | <i>SULF2</i>    | -3.863±0.497 | -2.995±1.359 | 8.98E-05 |
| cg21919219 | 1  | 104197899 | <i>AMY1A</i>    | 2.125±0.129  | 1.791±0.537  | 8.99E-05 |
| cg21296676 | 6  | 133561660 | <i>EYA4</i>     | -0.347±0.245 | 0.119±0.734  | 8.99E-05 |
| cg17491456 | 5  | 39424524  | <i>DAB2</i>     | -2.853±0.366 | -2.39±0.69   | 9.00E-05 |
| cg11761535 | 3  | 149051031 | <i>TM4SF18</i>  | 0.627±0.279  | 1.097±0.733  | 9.02E-05 |
| cg10604168 | 15 | 65360370  | <i>RASL12</i>   | -2.969±0.359 | -2.353±0.962 | 9.02E-05 |
| cg25355803 | 10 | 99473032  | <i>MARVELD1</i> | 0.225±0.146  | 0.429±0.311  | 9.02E-05 |
| cg12497692 | 19 | 36203089  | <i>ZBTB32</i>   | 4.523±0.392  | 4.034±0.728  | 9.04E-05 |
| cg26682500 | 13 | 43356116  | <i>FAM216B</i>  | 1.924±0.253  | 1.579±0.523  | 9.10E-05 |
| cg07566050 | 1  | 160174755 | <i>PEA15</i>    | 2.184±0.256  | 1.876±0.453  | 9.14E-05 |
| cg24845207 | 1  | 53924998  | <i>DMRTB1</i>   | 4.888±0.288  | 4.506±0.576  | 9.17E-05 |
| cg06862644 | 17 | 3375469   | <i>SPATA22</i>  | 2.48±0.269   | 2.102±0.576  | 9.21E-05 |
| cg23219720 | 7  | 88388555  | <i>ZNF804B</i>  | -2.643±0.288 | -2.148±0.775 | 9.24E-05 |
| cg26928682 | 6  | 41168801  | <i>TREML2</i>   | 1.375±0.323  | 0.808±0.889  | 9.27E-05 |
| cg17031773 | 19 | 51513611  | <i>KLK9</i>     | 0.017±0.275  | -0.458±0.745 | 9.27E-05 |
| cg00967316 | 7  | 113558794 | <i>PPP1R3A</i>  | 2.087±0.328  | 1.47±0.975   | 9.28E-05 |
| cg27431150 | 16 | 50715135  | <i>SNX20</i>    | 0.528±0.274  | -0.006±0.846 | 9.35E-05 |
| cg15250797 | 2  | 120281526 | <i>SCTR</i>     | -2.473±0.35  | -1.956±0.795 | 9.38E-05 |
| cg13185177 | 3  | 194119885 | <i>GP5</i>      | 1.911±0.299  | 1.539±0.555  | 9.40E-05 |
| cg06206626 | 22 | 26825900  | <i>ASPHD2</i>   | -0.467±0.139 | -0.222±0.385 | 9.47E-05 |
| cg25412453 | 1  | 155006219 | <i>DCST2</i>    | 1.75±0.158   | 1.587±0.229  | 9.48E-05 |
| cg23124451 | 22 | 39548131  | <i>CBX7</i>     | -1.169±0.393 | -0.675±0.739 | 9.48E-05 |
| cg09260441 | 20 | 53091739  | <i>DOK5</i>     | -3.657±0.39  | -2.893±1.211 | 9.49E-05 |
| cg08210616 | 3  | 44754195  | <i>ZNF502</i>   | -3.794±0.46  | -3.191±0.909 | 9.49E-05 |
| cg09068528 | 2  | 211090171 | <i>ACADL</i>    | -3.896±0.531 | -3.066±1.289 | 9.50E-05 |
| cg18661868 | 15 | 91427965  | <i>FES</i>      | -1.466±0.27  | -1.081±0.59  | 9.52E-05 |
| cg02218260 | 3  | 51742878  | <i>GRM2</i>     | 2.233±0.193  | 1.961±0.415  | 9.56E-05 |
| cg02589695 | 1  | 206730999 | <i>RASSF5</i>   | -1.786±0.376 | -2.43±1.011  | 9.57E-05 |
| cg11154879 | 20 | 61001775  | <i>RBBP8NL</i>  | 1.215±0.236  | 0.796±0.66   | 9.58E-05 |
| cg16793061 | 8  | 72273984  | <i>EYA1</i>     | -4.997±0.524 | -4.031±1.528 | 9.60E-05 |
| cg22340747 | 15 | 45683210  | <i>0</i>        | 1.462±0.156  | 1.129±0.532  | 9.61E-05 |
| cg15050111 | 1  | 24645850  | <i>GRHL3</i>    | -3.537±0.211 | -3.792±0.377 | 9.62E-05 |
| cg13007988 | 12 | 49449136  | <i>KMT2D</i>    | 0.695±0.262  | 0.963±0.377  | 9.65E-05 |
| cg26530497 | 13 | 36789025  | <i>SOHLH2</i>   | 2.795±0.193  | 2.476±0.5    | 9.65E-05 |
| cg05674944 | 1  | 26372290  | <i>SLC30A2</i>  | -2.718±0.722 | -1.896±1.198 | 9.69E-05 |
| cg13504059 | 17 | 38721942  | <i>CCR7</i>     | 1.319±0.325  | 0.906±0.619  | 9.69E-05 |
| cg04518155 | 4  | 170679294 | <i>C4orf27</i>  | -4.803±0.334 | -5.176±0.541 | 9.80E-05 |
| cg06630737 | 1  | 11752109  | <i>DRAXIN</i>   | -4.447±0.549 | -3.811±0.934 | 9.80E-05 |
| cg21522988 | 12 | 29376872  | <i>FAR2</i>     | 1.066±0.211  | 0.468±0.97   | 9.83E-05 |
| cg13828758 | 15 | 23932373  | <i>NDN</i>      | 0.25±0.137   | 0.464±0.334  | 9.84E-05 |
| cg15258980 | 2  | 68961597  | <i>ARHGAP25</i> | 0.602±0.414  | 0.063±0.813  | 9.85E-05 |
| cg11520395 | 1  | 227924115 | <i>JMJD4</i>    | 0.343±0.162  | 0.007±0.538  | 9.89E-05 |
| cg01618851 | 19 | 7812265   | <i>CD209</i>    | -0.28±0.23   | -0.681±0.632 | 9.90E-05 |
| cg22621695 | 12 | 68042799  | <i>DYRK2</i>    | -2.066±0.29  | -1.79±0.375  | 9.90E-05 |

|            |    |           |              |              |              |          |
|------------|----|-----------|--------------|--------------|--------------|----------|
| cg10173723 | 17 | 38940118  | KRT27        | 2.291±0.21   | 1.932±0.564  | 9.90E-05 |
| cg13966710 | 1  | 113392781 | LOC100996702 | -4.526±0.448 | -3.806±1.124 | 9.90E-05 |
| cg06374075 | 17 | 42836931  | ADAM11       | -3.276±0.253 | -2.735±0.867 | 9.91E-05 |
| cg12251804 | 10 | 135171083 | FUOM         | -4.548±0.399 | -3.391±1.877 | 9.94E-05 |
| cg05037688 | 9  | 139556554 | EGFL7        | -0.581±0.286 | -1.183±0.964 | 9.94E-05 |
| cg17034109 | 1  | 110036417 | CYB561D1     | -0.457±0.237 | -0.846±0.609 | 9.95E-05 |
| cg15821095 | 3  | 51428079  | RBM15B       | 1.957±0.236  | 1.483±0.757  | 9.96E-05 |
| cg17903316 | 18 | 44181660  | LOXHD1       | -0.958±0.254 | -0.482±0.755 | 1.00E-04 |
| cg10335931 | 11 | 47374575  | MYBPC3       | 2.624±0.188  | 2.433±0.268  | 1.01E-04 |
| cg07131544 | 6  | 41303030  | NCR2         | 1.258±0.167  | 0.882±0.604  | 1.01E-04 |
| cg26059632 | 1  | 153030751 | SPRR2A       | -0.144±0.329 | -0.653±0.792 | 1.01E-04 |
| cg17471102 | 19 | 5851255   | FUT3         | -1.074±0.345 | -0.666±0.604 | 1.01E-04 |
| cg15542496 | 7  | 142828356 | PIP          | 2.574±0.266  | 2.172±0.624  | 1.01E-04 |
| cg16719404 | 1  | 117296242 | CD2          | -0.688±0.301 | -1.125±0.676 | 1.01E-04 |
| cg11547724 | 11 | 6462452   | HPX          | 0.851±0.252  | 1.141±0.427  | 1.02E-04 |
| cg23815000 | 9  | 138413012 | LCN1         | 1.654±0.266  | 1.112±0.866  | 1.02E-04 |
| cg20542800 | 14 | 24782534  | LTB4R        | -0.609±0.27  | -0.043±0.907 | 1.02E-04 |
| cg08818984 | 5  | 142814827 | NR3C1        | -0.114±0.37  | -0.784±1.064 | 1.02E-04 |
| cg04398978 | 17 | 77814064  | CBX4         | -1.578±0.28  | -1.132±0.699 | 1.02E-04 |
| cg23146358 | 11 | 2905496   | CDKN1C       | -4.679±1.164 | -3.615±1.415 | 1.03E-04 |
| cg20019546 | 7  | 37955824  | SFRP4        | -1.879±0.366 | -1.247±0.997 | 1.03E-04 |
| cg04609640 | 1  | 45254092  | BEST4        | 0.114±0.257  | 0.467±0.54   | 1.04E-04 |
| cg10735607 | 11 | 60680515  | TMEM109      | 0.229±0.373  | 0.798±0.886  | 1.04E-04 |
| cg15733266 | 2  | 118775305 | 0            | 3.048±0.275  | 2.695±0.534  | 1.04E-04 |
| cg15954792 | 2  | 98986971  | CNGA3        | 1.258±0.263  | 0.893±0.56   | 1.04E-04 |
| cg23363832 | 3  | 139258939 | RBP1         | -3.207±0.37  | -2.499±1.129 | 1.04E-04 |
| cg27631256 | 9  | 117692745 | TNFSF8       | 0.331±0.441  | -0.262±0.904 | 1.04E-04 |
| cg11459714 | 19 | 51520658  | KLK10        | -3.524±0.479 | -2.932±0.887 | 1.04E-04 |
| cg20684549 | 19 | 822842    | LPPR3        | -0.145±0.248 | 0.284±0.679  | 1.04E-04 |
| cg09494188 | 11 | 62186529  | SCGB1A1      | 2.359±0.342  | 2.057±0.392  | 1.04E-04 |
| cg11177404 | 19 | 49535079  | SNAR-G2      | -0.843±0.337 | -0.365±0.737 | 1.04E-04 |
| cg06641503 | 3  | 48959341  | ARIH2        | 1.285±0.368  | 0.878±0.591  | 1.05E-04 |
| cg17281600 | 1  | 157568591 | FCRL4        | 2.279±0.387  | 1.679±0.937  | 1.05E-04 |
| cg22088594 | 13 | 37634133  | SUPT20H      | -2.61±0.232  | -2.854±0.348 | 1.05E-04 |
| cg22575540 | 2  | 27505625  | TRIM54       | 1.487±0.259  | 1.86±0.577   | 1.05E-04 |
| cg07426848 | 1  | 153521712 | S100A3       | 0.861±0.378  | 0.466±0.564  | 1.05E-04 |
| cg19950767 | 13 | 20110871  | TPTE2        | 0.565±0.326  | 0.23±0.473   | 1.05E-04 |
| cg26620959 | 6  | 152958489 | SYNE1        | -3.73±0.325  | -3.173±0.88  | 1.06E-04 |
| cg13697378 | 1  | 68512845  | DIRAS3       | 1.011±0.23   | 1.339±0.506  | 1.06E-04 |
| cg24974599 | 1  | 196620428 | CFH          | 1.67±0.216   | 1.284±0.611  | 1.06E-04 |
| cg02099418 | 2  | 204571146 | CD28         | 0.465±0.392  | -0.108±0.888 | 1.07E-04 |
| cg13645078 | 1  | 201438647 | PHLDA3       | -3.848±0.445 | -3.251±0.912 | 1.07E-04 |
| cg22337624 | 16 | 72126421  | TXNL4B       | -0.112±0.237 | 0.35±0.74    | 1.07E-04 |
| cg22197787 | 1  | 211306986 | KCNH1        | -5.042±0.508 | -4.277±1.192 | 1.07E-04 |
| cg27655855 | 20 | 23549455  | CST9L        | 1.717±0.172  | 1.298±0.679  | 1.07E-04 |
| cg01655355 | 19 | 17982748  | SLC5A5       | -4.153±0.325 | -3.683±0.729 | 1.07E-04 |
| cg18962105 | 11 | 66444806  | RBM4B        | -4.741±0.451 | -3.863±1.407 | 1.08E-04 |
| cg27217148 | 10 | 105111158 | PCGF6        | -2.89±0.321  | -2.516±0.555 | 1.08E-04 |
| cg13083810 | 6  | 31139156  | POU5F1       | 2.858±0.15   | 2.685±0.255  | 1.08E-04 |
| cg07800320 | 3  | 125899567 | ALDH1L1      | -3.991±0.534 | -3.197±1.236 | 1.08E-04 |
| cg01926595 | 17 | 4851808   | PFN1         | -2.975±0.374 | -2.633±0.456 | 1.08E-04 |
| cg25141490 | 5  | 148759090 | IL17B        | 1.504±0.261  | 1.011±0.787  | 1.08E-04 |
| cg20053158 | 12 | 103351206 | ASCL1        | -2.924±0.424 | -2.311±0.949 | 1.08E-04 |
| cg11868900 | 8  | 49648035  | EFCAB1       | -2.986±0.595 | -2.182±1.232 | 1.09E-04 |
| cg17747005 | 8  | 68864324  | PREX2        | -4.374±0.63  | -3.669±1.032 | 1.09E-04 |
| cg05937453 | 10 | 99531765  | SFRP5        | -4.812±0.703 | -3.703±1.74  | 1.09E-04 |
| cg15043801 | 19 | 10305911  | DNMT1        | -4.537±0.3   | -4.838±0.423 | 1.09E-04 |
| cg13226172 | 9  | 34589381  | CNTFR        | -5.143±0.61  | -4.373±1.165 | 1.09E-04 |
| cg18910313 | 19 | 10222409  | P2RY11       | 0.411±0.364  | -0.059±0.714 | 1.10E-04 |
| cg13500388 | 16 | 67062135  | CBFB         | 0.777±0.216  | 0.401±0.596  | 1.10E-04 |
| cg05596756 | 12 | 47610220  | PCED1B-AS1   | 0.862±0.438  | 0.264±0.92   | 1.10E-04 |
| cg12144803 | 3  | 123813383 | KALRN        | 2.513±0.183  | 2.119±0.635  | 1.10E-04 |
| cg02096656 | 7  | 139025181 | C7orf55      | -3.37±0.379  | -3.082±0.324 | 1.11E-04 |
| cg07537523 | 12 | 25102311  | BCAT1        | -4.339±0.42  | -3.711±0.98  | 1.11E-04 |
| cg03721967 | 13 | 114009720 | GRTP1        | 3.076±0.201  | 2.86±0.314   | 1.11E-04 |
| cg20176532 | 19 | 58458979  | ZNF256       | -4.739±0.432 | -3.573±1.903 | 1.11E-04 |
| cg21026663 | 6  | 26189234  | HIST1H4D     | -5.345±0.546 | -3.999±2.19  | 1.11E-04 |

|            |    |           |                   |              |              |          |
|------------|----|-----------|-------------------|--------------|--------------|----------|
| cg11203041 | 12 | 16500185  | <i>MGST1</i>      | 0.302±0.278  | -0.184±0.772 | 1.12E-04 |
| cg23492043 | 1  | 177134266 | <i>ASTN1</i>      | -2.916±0.252 | -2.32±0.968  | 1.12E-04 |
| cg26851800 | 5  | 147548826 | <i>SPINK14</i>    | 2.017±0.319  | 1.731±0.379  | 1.12E-04 |
| cg19408398 | 4  | 54243328  | <i>FIP1L1</i>     | -0.495±0.235 | -0.097±0.631 | 1.12E-04 |
| cg13968061 | 1  | 159557257 | <i>APCS</i>       | 1.588±0.264  | 1.1±0.78     | 1.12E-04 |
| cg21663431 | 19 | 10736355  | <i>SLC44A2</i>    | 0.336±0.366  | 0.732±0.576  | 1.12E-04 |
| cg21096591 | 16 | 32265019  | <i>TP53TG3D</i>   | -0.613±0.251 | -0.339±0.398 | 1.13E-04 |
| cg21399079 | 2  | 105858139 | <i>GPR45</i>      | 3.535±0.239  | 3.135±0.633  | 1.13E-04 |
| cg14264994 | 20 | 56099548  | <i>CTCFL</i>      | 3.339±0.152  | 3.139±0.307  | 1.14E-04 |
| cg07150830 | 17 | 26127542  | <i>NOS2</i>       | 4.178±0.346  | 3.474±1.133  | 1.14E-04 |
| cg10222534 | 19 | 48958894  | <i>KCNJ14</i>     | 1.899±0.32   | 2.229±0.472  | 1.14E-04 |
| cg20304401 | 8  | 101733920 | <i>PABPC1</i>     | -2.406±0.409 | -2.077±0.398 | 1.14E-04 |
| cg17749384 | 10 | 28571186  | <i>MPP7</i>       | 1.5±0.226    | 1.823±0.502  | 1.15E-04 |
| cg23824713 | 18 | 61157738  | <i>SERPINB5</i>   | 1.755±0.551  | 2.196±0.532  | 1.15E-04 |
| cg11710560 | 17 | 39389144  | <i>KRTAP9-3</i>   | 2.473±0.227  | 2.108±0.576  | 1.15E-04 |
| cg13883681 | 16 | 58768565  | <i>GOT2</i>       | 0.107±0.262  | 0.514±0.64   | 1.15E-04 |
| cg02863947 | 3  | 119499190 | <i>NR1I2</i>      | 2.22±0.404   | 1.586±0.999  | 1.15E-04 |
| cg20380069 | 12 | 120806617 | <i>MSI1</i>       | -4.481±0.933 | -3.525±1.363 | 1.15E-04 |
| cg22407458 | 6  | 35109121  | <i>TCP11</i>      | -0.361±0.32  | 0.164±0.831  | 1.15E-04 |
| cg22750254 | 10 | 13043421  | <i>CCDC3</i>      | -3.779±0.588 | -2.916±1.346 | 1.15E-04 |
| cg01031251 | 1  | 26855423  | <i>RPS6KA1</i>    | -0.169±0.318 | 0.287±0.709  | 1.15E-04 |
| cg24396745 | 15 | 73660614  | <i>HCN4</i>       | -2.097±0.943 | -1.182±1.271 | 1.15E-04 |
| cg07703337 | 19 | 52847943  | <i>ZNF610</i>     | 1.984±0.323  | 1.587±0.6    | 1.15E-04 |
| cg06220208 | 9  | 66555032  | <i>0</i>          | 2.014±0.407  | 1.602±0.584  | 1.16E-04 |
| cg13274713 | 17 | 59477286  | <i>TBX2</i>       | -4.225±0.653 | -3.312±1.414 | 1.16E-04 |
| cg08080029 | 1  | 6239970   | <i>CHD5</i>       | -3.286±0.771 | -2.344±1.421 | 1.16E-04 |
| cg24849648 | 7  | 120964019 | <i>WNT16</i>      | -1.175±0.308 | -0.681±0.782 | 1.16E-04 |
| cg13300756 | 19 | 52228038  | <i>HAS1</i>       | -0.058±0.306 | 0.383±0.687  | 1.16E-04 |
| cg01240931 | 5  | 112074043 | <i>APC</i>        | -0.233±0.212 | 0.132±0.582  | 1.17E-04 |
| cg15836722 | 2  | 113593785 | <i>IL1B</i>       | 0.933±0.35   | 0.424±0.795  | 1.17E-04 |
| cg18905252 | 2  | 131356362 | <i>CFC1</i>       | -0.549±0.254 | -0.152±0.627 | 1.17E-04 |
| cg27038439 | 4  | 4864320   | <i>MSX1</i>       | 2.165±0.3    | 2.538±0.566  | 1.17E-04 |
| cg24997944 | 3  | 19189709  | <i>KCNH8</i>      | -3.929±0.413 | -3.113±1.316 | 1.18E-04 |
| cg02719634 | 11 | 2924899   | <i>SLC22A18AS</i> | 2.146±0.524  | 1.526±0.928  | 1.18E-04 |
| cg25936385 | 12 | 50298731  | <i>FAIM2</i>      | 3.324±0.268  | 2.83±0.792   | 1.18E-04 |
| cg04712892 | 10 | 115424103 | <i>NRAP</i>       | 3.153±0.222  | 2.882±0.41   | 1.19E-04 |
| cg04898797 | 11 | 64570331  | <i>MAP4K2</i>     | -1.677±0.219 | -2.167±0.797 | 1.19E-04 |
| cg06388544 | 1  | 25598878  | <i>RHD</i>        | 0.688±0.25   | 1.07±0.603   | 1.19E-04 |
| cg24453664 | 11 | 33758413  | <i>CD59</i>       | -1.79±0.496  | -1.171±0.939 | 1.19E-04 |
| cg24084891 | 18 | 49868788  | <i>DCC</i>        | -2.922±0.378 | -2.462±0.694 | 1.20E-04 |
| cg10059104 | 22 | 21986360  | <i>CCDC116</i>    | 4.472±0.361  | 3.911±0.886  | 1.20E-04 |
| cg15662251 | 1  | 26197855  | <i>PAQR7</i>      | -0.6±0.238   | -0.165±0.697 | 1.20E-04 |
| cg22198623 | 16 | 56701868  | <i>MT1G</i>       | -3.069±0.295 | -2.51±0.899  | 1.20E-04 |
| cg22182666 | 17 | 56405155  | <i>BZRAP1</i>     | 1.396±0.252  | 0.977±0.666  | 1.20E-04 |
| cg23502772 | 5  | 43191975  | <i>NIM1</i>       | -4.071±0.343 | -3.241±1.356 | 1.20E-04 |
| cg07143898 | 10 | 98945300  | <i>SLIT1</i>      | -4.519±0.388 | -3.642±1.428 | 1.21E-04 |
| cg12119029 | 16 | 89752879  | <i>CDK10</i>      | -0.689±0.285 | -1.088±0.62  | 1.21E-04 |
| cg20134151 | 6  | 150463500 | <i>PPP1R14C</i>   | -3.474±0.335 | -2.956±0.817 | 1.21E-04 |
| cg18364088 | 3  | 123676909 | <i>CCDC14</i>     | 1.198±0.254  | 1.461±0.377  | 1.21E-04 |
| cg00756058 | 13 | 96296844  | <i>DZIP1</i>      | -5.676±0.688 | -4.668±1.58  | 1.21E-04 |
| cg22780475 | 19 | 45281526  | <i>CBLC</i>       | 1.051±0.254  | 0.6±0.721    | 1.21E-04 |
| cg24662961 | 16 | 54320670  | <i>IRX3</i>       | -2.792±0.649 | -2.201±0.799 | 1.21E-04 |
| cg10866709 | 8  | 11561361  | <i>GATA4</i>      | -3.344±0.269 | -2.88±0.741  | 1.21E-04 |
| cg17078393 | 1  | 32717002  | <i>LCK</i>        | 1.752±0.462  | 1.182±0.864  | 1.21E-04 |
| cg22339278 | 19 | 36347276  | <i>KIRREL2</i>    | -3.636±0.338 | -3.269±0.536 | 1.21E-04 |
| cg06353318 | 17 | 72920378  | <i>OTOP2</i>      | -3.163±0.345 | -2.612±0.874 | 1.21E-04 |
| cg19005210 | 6  | 41168960  | <i>TREML2</i>     | 0.846±0.326  | 0.281±0.903  | 1.21E-04 |
| cg04329382 | 22 | 46480891  | <i>MIRLET7BHG</i> | -0.681±0.367 | 0.057±1.194  | 1.22E-04 |
| cg17386433 | 1  | 28052708  | <i>FAM76A</i>     | -5.278±0.646 | -4.716±0.734 | 1.22E-04 |
| cg00119079 | 3  | 182880278 | <i>LAMP3</i>      | -4.44±0.271  | -4.695±0.352 | 1.23E-04 |
| cg22229142 | 22 | 37447306  | <i>KCTD17</i>     | 0.225±0.184  | -0.201±0.696 | 1.23E-04 |
| cg14070162 | 17 | 40575582  | <i>PTRF</i>       | -1.877±0.386 | -1.476±0.578 | 1.23E-04 |
| cg10150530 | 12 | 25205468  | <i>LRMP</i>       | -3.122±0.434 | -2.405±1.142 | 1.23E-04 |
| cg07085271 | 20 | 33813815  | <i>MMP24</i>      | -0.055±0.289 | 0.377±0.679  | 1.23E-04 |
| cg15800421 | 17 | 40834743  | <i>CNTNAP1</i>    | -3.462±0.285 | -3.094±0.563 | 1.23E-04 |
| cg25092283 | 10 | 97321585  | <i>SORBS1</i>     | -1.564±0.254 | -1.922±0.557 | 1.23E-04 |
| cg10562586 | 2  | 210444154 | <i>MAP2</i>       | -0.841±0.321 | -0.366±0.746 | 1.24E-04 |

|            |    |           |           |              |              |          |
|------------|----|-----------|-----------|--------------|--------------|----------|
| cg10507231 | 1  | 204459638 | PIK3C2B   | 3.238±0.255  | 3.432±0.222  | 1.24E-04 |
| cg25832796 | 14 | 24038103  | AP1G2     | -2.125±0.352 | -1.576±0.868 | 1.24E-04 |
| cg01836044 | 13 | 61989203  | PCDH20    | -4.611±0.585 | -3.934±1.012 | 1.24E-04 |
| cg10057218 | 17 | 38074149  | GSDMB     | 2.414±0.284  | 1.87±0.878   | 1.24E-04 |
| cg10999429 | 12 | 52300973  | ACVRL1    | -4.507±0.429 | -3.93±0.894  | 1.24E-04 |
| cg10964421 | 8  | 23021093  | TNFRSF10D | -3.279±0.378 | -2.961±0.406 | 1.24E-04 |
| cg15702701 | 12 | 56075367  | METTL7B   | -3.544±0.347 | -3.822±0.339 | 1.25E-04 |
| cg03856723 | 19 | 14229466  | PRKACA    | -3.817±0.441 | -3.366±0.646 | 1.25E-04 |
| cg06941093 | 1  | 54199696  | GLIS1     | 2.259±0.177  | 2.05±0.315   | 1.25E-04 |
| cg00463202 | 13 | 114107710 | ADPRHL1   | 2.263±0.241  | 2.474±0.279  | 1.25E-04 |
| cg06429195 | 3  | 16646582  | DAZL      | 3.229±0.202  | 3.055±0.226  | 1.25E-04 |
| cg00673191 | 21 | 37536923  | DOPEY2    | -1.394±0.365 | -0.92±0.729  | 1.25E-04 |
| cg03294557 | 18 | 61312477  | SERPINB4  | -0.338±0.264 | -0.668±0.505 | 1.26E-04 |
| cg22233974 | 1  | 39546511  | 0         | -1.247±0.303 | -0.714±0.856 | 1.26E-04 |
| cg18153060 | 12 | 52779793  | KRT84     | 2.181±0.217  | 1.754±0.692  | 1.26E-04 |
| cg14681629 | 5  | 43041808  | LOC153684 | -3.148±0.289 | -3.545±0.618 | 1.27E-04 |
| cg08623383 | 1  | 28205926  | THEMIS2   | -0.626±0.237 | -0.151±0.772 | 1.27E-04 |
| cg19918758 | 1  | 108508113 | VAV3      | -5.723±0.518 | -4.872±1.358 | 1.27E-04 |
| cg16245844 | 12 | 1800488   | ADIPOR2   | -4.607±0.409 | -4.267±0.432 | 1.27E-04 |
| cg24884084 | 1  | 153003198 | SPRR1B    | -0.879±0.207 | -1.356±0.782 | 1.28E-04 |
| cg18530324 | 18 | 46064992  | CTIF      | -0.591±0.288 | -0.094±0.798 | 1.28E-04 |
| cg17864730 | 7  | 20370899  | ITGB8     | -4.575±0.358 | -4.979±0.601 | 1.28E-04 |
| cg00108454 | 1  | 22963614  | C1QA      | -0.278±0.146 | -0.545±0.431 | 1.28E-04 |
| cg17095797 | 16 | 86612013  | FOXL1     | -0.921±0.377 | -0.437±0.745 | 1.28E-04 |
| cg24646414 | 8  | 11565725  | GATA4     | -0.509±0.473 | 0.006±0.758  | 1.29E-04 |
| cg09988116 | 1  | 43750693  | C1orf210  | 1.428±0.32   | 0.797±1.024  | 1.29E-04 |
| cg26111757 | 20 | 31642120  | BPIFB3    | 1.13±0.257   | 0.553±0.945  | 1.30E-04 |
| cg06037693 | 1  | 25292072  | RUNX3     | 2.055±0.337  | 1.728±0.46   | 1.30E-04 |
| cg08301503 | 6  | 33561188  | LINC00336 | -0.74±0.267  | -1.368±1.031 | 1.30E-04 |
| cg00245878 | 7  | 64450875  | ZNF117    | 2.302±0.255  | 1.742±0.916  | 1.30E-04 |
| cg00625425 | 1  | 62785512  | KANK4     | 0.786±0.255  | 0.355±0.69   | 1.31E-04 |
| cg19713460 | 22 | 39745530  | SYNGR1    | -2.117±0.452 | -1.395±1.151 | 1.31E-04 |
| cg05822532 | 7  | 73442531  | ELN       | -2.135±0.569 | -1.402±1.128 | 1.31E-04 |
| cg23470272 | 19 | 14640395  | TECR      | -4.467±0.347 | -4.152±0.429 | 1.31E-04 |
| cg00311768 | 8  | 144698857 | TSTA3     | 0.857±0.233  | 0.397±0.747  | 1.31E-04 |
| cg06242000 | 3  | 183966155 | ALG3      | -3.613±0.381 | -3.957±0.466 | 1.31E-04 |
| cg17942553 | 1  | 150850380 | ARNT      | 1.857±0.233  | 1.558±0.461  | 1.31E-04 |
| cg21505334 | 19 | 42213020  | CEACAM5   | 2.265±0.258  | 1.714±0.901  | 1.32E-04 |
| cg09699159 | 11 | 45115528  | PRDM11    | 2.338±0.258  | 1.924±0.66   | 1.32E-04 |
| cg08081725 | 16 | 15743607  | NDE1      | -3.236±0.427 | -2.85±0.523  | 1.32E-04 |
| cg23152772 | 9  | 133813632 | FIBCD1    | -2.358±0.278 | -1.878±0.772 | 1.32E-04 |
| cg10108208 | 19 | 33571252  | GPATCH1   | 1.05±0.275   | 0.608±0.706  | 1.33E-04 |
| cg12850636 | 19 | 3727602   | TJP3      | 1.904±0.209  | 1.672±0.345  | 1.33E-04 |
| cg17705056 | 18 | 77711560  | PQLC1     | -3.122±0.326 | -2.857±0.331 | 1.33E-04 |
| cg01425670 | 1  | 72749015  | NEGR1     | -5.255±0.527 | -4.459±1.262 | 1.33E-04 |
| cg18695917 | 4  | 163085342 | FSTL5     | -4.435±0.462 | -3.635±1.287 | 1.33E-04 |
| cg09754413 | 6  | 13925567  | RNF182    | -3.164±0.238 | -2.465±1.158 | 1.33E-04 |
| cg18915143 | 5  | 149323959 | PDE6A     | 3.201±0.214  | 3.015±0.246  | 1.34E-04 |
| cg24727182 | 4  | 109684250 | ETNPPL    | -4.347±0.516 | -3.704±0.986 | 1.34E-04 |
| cg05498681 | 20 | 35973318  | SRC       | 1.7±0.257    | 1.078±1.025  | 1.34E-04 |
| cg11799561 | 4  | 71227017  | SMR3A     | 1.683±0.338  | 1.3±0.574    | 1.34E-04 |
| cg17503750 | 21 | 31913933  | KRTAP19-6 | 1.814±0.428  | 1.314±0.753  | 1.34E-04 |
| cg06293195 | 22 | 36878654  | TXN2      | 0.777±0.18   | 0.55±0.349   | 1.34E-04 |
| cg10087081 | 19 | 34789667  | KIAA0355  | 0.694±0.24   | 0.949±0.373  | 1.34E-04 |
| cg07671208 | 6  | 26457220  | BTN2A1    | 1.749±0.232  | 1.482±0.4    | 1.35E-04 |
| cg14143055 | 8  | 24240597  | ADAMDEC1  | 2.123±0.312  | 1.806±0.457  | 1.36E-04 |
| cg22777952 | 15 | 60296425  | FOXB1     | -3.554±0.368 | -2.75±1.32   | 1.37E-04 |
| cg05869964 | 5  | 111095756 | NREP      | 2.828±0.194  | 2.643±0.26   | 1.37E-04 |
| cg12869240 | 10 | 127569973 | DHX32     | 0.001±0.228  | 0.343±0.543  | 1.38E-04 |
| cg04394102 | 22 | 24321863  | DDT       | -2.306±0.394 | -1.914±0.562 | 1.38E-04 |
| cg18987220 | 6  | 146864247 | RAB32     | 1.994±0.196  | 1.597±0.648  | 1.38E-04 |
| cg24691255 | 18 | 61553966  | SERPINB2  | 2.773±0.296  | 2.147±1.026  | 1.38E-04 |
| cg12941931 | 19 | 4559799   | SEMA6B    | 0.285±0.287  | -0.384±1.103 | 1.38E-04 |
| cg04428453 | 16 | 20420652  | ACSM5     | 3.04±0.255   | 2.62±0.675   | 1.38E-04 |
| cg18034859 | 20 | 30406688  | MYLK2     | 3.258±0.231  | 2.85±0.66    | 1.39E-04 |
| cg18555555 | 6  | 123099534 | FABP7     | 5.29±0.387   | 4.929±0.501  | 1.40E-04 |
| cg01939681 | 5  | 160975024 | GABRB2    | -4.084±0.36  | -3.255±1.366 | 1.40E-04 |

|            |    |           |            |              |              |          |
|------------|----|-----------|------------|--------------|--------------|----------|
| cg13301933 | 15 | 61521439  | RORA       | -4.584±0.438 | -3.803±1.265 | 1.40E-04 |
| cg11466485 | 9  | 136605868 | SARDH      | 3.009±0.238  | 2.7±0.481    | 1.41E-04 |
| cg07608333 | 19 | 7813422   | CD209      | 0.066±0.248  | -0.289±0.561 | 1.41E-04 |
| cg27092035 | 5  | 175792880 | ARL10      | -4.707±0.268 | -3.878±1.382 | 1.41E-04 |
| cg23391785 | 1  | 171810972 | DNM3       | -4.981±0.546 | -3.923±1.726 | 1.41E-04 |
| cg19884658 | 1  | 6664268   | KLHL21     | -1.211±0.378 | -0.513±1.134 | 1.41E-04 |
| cg24076399 | 20 | 23618348  | CST3       | -4.66±0.75   | -3.986±0.915 | 1.41E-04 |
| cg22247240 | 14 | 74815187  | VRTN       | 1.115±0.334  | 1.497±0.576  | 1.42E-04 |
| cg24030609 | 1  | 15802611  | CELA2B     | 0.511±0.28   | 0.816±0.452  | 1.42E-04 |
| cg13644052 | 16 | 3010410   | 0          | 1.401±0.304  | 0.848±0.9    | 1.43E-04 |
| cg23001457 | 11 | 18956283  | MRGPRX1    | 0.11±0.268   | -0.344±0.732 | 1.43E-04 |
| cg04103514 | 19 | 14889425  | EMR2       | -1.482±0.292 | -1.994±0.83  | 1.44E-04 |
| cg26583078 | 4  | 186877778 | SORBS2     | 2.966±0.35   | 2.521±0.689  | 1.44E-04 |
| cg22842233 | 3  | 118892068 | UPK1B      | 1.623±0.279  | 1.937±0.472  | 1.44E-04 |
| cg17878972 | 3  | 192959356 | MGC2889    | -3.347±0.392 | -2.765±0.927 | 1.45E-04 |
| cg00754617 | 19 | 49109288  | SPACA4     | 0.567±0.259  | 0.851±0.423  | 1.45E-04 |
| cg24392574 | 10 | 5541423   | CALML5     | 4.498±0.245  | 4.134±0.581  | 1.47E-04 |
| cg21794225 | 14 | 30397464  | PRKD1      | -1.713±0.309 | -1.208±0.814 | 1.47E-04 |
| cg09801065 | 5  | 150949152 | FAT2       | 0.098±0.24   | -0.296±0.637 | 1.48E-04 |
| cg01851208 | 10 | 82168043  | FAM213A    | -4.012±0.3   | -4.297±0.402 | 1.49E-04 |
| cg15743985 | 19 | 35819809  | CD22       | 1.219±0.336  | 0.635±0.947  | 1.49E-04 |
| cg11398517 | 20 | 42355625  | GTSF1L     | 0.168±0.318  | 0.677±0.82   | 1.50E-04 |
| cg10883621 | 2  | 26624604  | DRC1       | -2.174±0.33  | -1.768±0.627 | 1.50E-04 |
| cg08211091 | 4  | 2061923   | NAT8L      | -3.351±0.365 | -2.381±1.617 | 1.51E-04 |
| cg10691387 | 3  | 51895618  | IQCF2      | 1.103±0.218  | 0.606±0.824  | 1.51E-04 |
| cg13074965 | 11 | 66395305  | RBM14-RBM4 | 3.032±0.206  | 2.834±0.283  | 1.52E-04 |
| cg00514895 | 4  | 8594413   | CPZ        | -4.348±0.761 | -3.49±1.295  | 1.52E-04 |
| cg19947621 | 9  | 34263021  | KIF24      | 1.483±0.317  | 1.089±0.61   | 1.52E-04 |
| cg06898923 | 10 | 27792905  | RAB18      | -3.791±0.348 | -4.079±0.37  | 1.52E-04 |
| cg07545925 | 11 | 118214927 | CD3G       | -0.776±0.272 | -0.392±0.61  | 1.52E-04 |
| cg15475323 | 19 | 49220102  | MAMSTR     | -0.541±0.464 | 0.159±1.121  | 1.53E-04 |
| cg12493160 | 9  | 71628957  | PRKACG     | 2.879±0.351  | 2.508±0.547  | 1.53E-04 |
| cg25104511 | 17 | 38333503  | RAPGEFL1   | -0.79±0.202  | -1.051±0.407 | 1.53E-04 |
| cg26782833 | 2  | 128642103 | AMMECR1L   | -0.1±0.283   | 0.407±0.827  | 1.53E-04 |
| cg13643585 | 17 | 46704004  | HOXB9      | -4.537±0.411 | -3.531±1.673 | 1.53E-04 |
| cg23713742 | 20 | 34202721  | SPAG4      | 1.33±0.256   | 0.778±0.912  | 1.54E-04 |
| cg17465827 | 4  | 148538229 | TMEM184C   | -2.143±0.296 | -2.419±0.387 | 1.54E-04 |
| cg12091331 | 8  | 42065314  | PLAT       | -0.938±0.379 | -0.329±0.983 | 1.54E-04 |
| cg25192419 | 8  | 25042348  | DOCK5      | -5.47±0.938  | -4.675±1.048 | 1.54E-04 |
| cg10946435 | 1  | 154843044 | KCNN3      | -3.841±0.357 | -3.09±1.24   | 1.54E-04 |
| cg14290291 | 2  | 130940680 | SMPD4      | 0.08±0.276   | -0.339±0.671 | 1.54E-04 |
| cg05471297 | 19 | 38924349  | RYR1       | -4.148±0.254 | -3.489±1.1   | 1.55E-04 |
| cg22268231 | 19 | 50922484  | SPIB       | -1.211±0.296 | -0.656±0.909 | 1.55E-04 |
| cg11516377 | 17 | 1933153   | DPH1       | -2.861±0.357 | -2.282±0.936 | 1.55E-04 |
| cg05010967 | 6  | 44310640  | SPATS1     | -2.086±0.353 | -1.475±0.995 | 1.56E-04 |
| cg14681767 | 8  | 1772393   | ARHGEF10   | -4.032±0.821 | -3.265±1.078 | 1.56E-04 |
| cg10869069 | 6  | 101329502 | ASCC3      | -3.422±0.124 | -3.529±0.142 | 1.56E-04 |
| cg04376312 | 3  | 123602485 | MYLK       | -0.973±0.202 | -0.432±0.903 | 1.56E-04 |
| cg07452799 | 10 | 35103869  | PARD3      | -4.202±0.947 | -3.418±1.016 | 1.56E-04 |
| cg21505886 | 4  | 1724428   | TACC3      | 0.488±0.298  | -0.017±0.821 | 1.57E-04 |
| cg22161476 | 4  | 163085081 | FSTL5      | -4.072±0.491 | -3.322±1.204 | 1.57E-04 |
| cg16222762 | 18 | 40857464  | SYT4       | -4.502±0.428 | -3.879±0.994 | 1.57E-04 |
| cg25101936 | 11 | 113929164 | ZBTB16     | 0.507±0.195  | 0.139±0.604  | 1.57E-04 |
| cg06501084 | 14 | 63568195  | KCNH5      | 0.434±0.335  | 0.021±0.641  | 1.57E-04 |
| cg13689073 | 5  | 154093260 | LARP1      | 0.342±0.221  | -0.112±0.749 | 1.57E-04 |
| cg08332212 | 6  | 33770850  | MLN        | 1.678±0.233  | 1.14±0.894   | 1.57E-04 |
| cg06874144 | 2  | 231576873 | CAB39      | 1.214±0.273  | 0.691±0.859  | 1.58E-04 |
| cg13801381 | 12 | 4384022   | CCND2      | -5.335±0.535 | -4.128±2.004 | 1.58E-04 |
| cg13474734 | 15 | 40630791  | C15orf52   | 1.828±0.17   | 1.478±0.578  | 1.59E-04 |
| cg00043004 | 16 | 2030892   | NOXO1      | -3.704±0.418 | -3.149±0.874 | 1.59E-04 |
| cg03440267 | 6  | 6321061   | F13A1      | -2.401±0.267 | -2.863±0.755 | 1.60E-04 |
| cg08244522 | 20 | 23030533  | THBD       | -4.919±0.467 | -4.219±1.124 | 1.60E-04 |
| cg18524091 | 1  | 19185772  | TAS1R2     | 2.174±0.228  | 1.866±0.487  | 1.60E-04 |
| cg01307730 | 6  | 25726597  | HIST1H2AA  | 2.994±0.206  | 2.694±0.48   | 1.60E-04 |
| cg19731268 | 10 | 73724697  | CHST3      | -3.738±0.572 | -2.843±1.446 | 1.61E-04 |
| cg23773532 | 12 | 13103216  | GPRC5D     | 2.384±0.429  | 1.929±0.678  | 1.61E-04 |
| cg02128567 | 6  | 39196998  | KCNK5      | -4.339±0.779 | -3.536±1.184 | 1.61E-04 |

|            |    |           |           |              |              |          |
|------------|----|-----------|-----------|--------------|--------------|----------|
| cg24198840 | 2  | 233897561 | NEU2      | 3.296±0.327  | 2.903±0.607  | 1.62E-04 |
| cg11164400 | 7  | 94536787  | PPP1R9A   | -1.634±0.307 | -2.051±0.659 | 1.63E-04 |
| cg16222568 | 2  | 220308071 | SPEG      | 2.014±0.213  | 1.696±0.51   | 1.63E-04 |
| cg03817621 | 10 | 52645399  | A1CF      | 1.708±0.335  | 1.173±0.866  | 1.63E-04 |
| cg10414058 | 5  | 141017903 | RELL2     | -2.561±0.399 | -1.946±0.992 | 1.63E-04 |
| cg04282622 | 12 | 100040922 | FAM71C    | 0.886±0.257  | 0.46±0.693   | 1.65E-04 |
| cg22782492 | 3  | 10184007  | VHL       | -4.236±0.273 | -4.502±0.383 | 1.65E-04 |
| cg25225073 | 14 | 90528983  | KCNK13    | -4.644±0.355 | -3.9±1.234   | 1.65E-04 |
| cg01620785 | 2  | 27436111  | ATRAID    | -2.121±0.298 | -2.441±0.479 | 1.65E-04 |
| cg25668626 | 12 | 113343603 | OAS1      | 0.676±0.299  | 0.226±0.725  | 1.65E-04 |
| cg18403361 | 14 | 38725750  | CLEC14A   | -1.179±0.435 | -0.44±1.205  | 1.65E-04 |
| cg22424746 | 1  | 117753313 | VTCN1     | 1.014±0.218  | 0.704±0.494  | 1.65E-04 |
| cg23439277 | 10 | 95790874  | PLCE1     | 2.223±0.373  | 1.849±0.546  | 1.65E-04 |
| cg02756845 | 22 | 51038542  | MAPK8IP2  | -2.153±0.366 | -1.748±0.614 | 1.66E-04 |
| cg13813391 | 16 | 66613407  | CMTM2     | 1.41±0.324   | 1.734±0.474  | 1.67E-04 |
| cg23337754 | 15 | 78632859  | CRABP1    | -4.525±0.504 | -3.629±1.471 | 1.68E-04 |
| cg15639951 | 17 | 43367609  | MAP3K14   | 1.118±0.285  | 1.756±1.063  | 1.68E-04 |
| cg19998328 | 19 | 11038320  | YIPF2     | 1.347±0.212  | 0.954±0.648  | 1.68E-04 |
| cg24454579 | 19 | 53794794  | BIRC8     | 1.637±0.273  | 1.23±0.656   | 1.68E-04 |
| cg22549408 | 18 | 57566300  | PMAIP1    | -0.589±0.328 | -1.008±0.657 | 1.69E-04 |
| cg09722555 | 9  | 34662282  | CCL27     | 2.662±0.306  | 2.254±0.647  | 1.69E-04 |
| cg08508325 | 11 | 3079039   | CARS      | -2.905±0.511 | -2.429±0.672 | 1.69E-04 |
| cg21789545 | 6  | 71012391  | COL9A1    | 0.275±0.235  | -0.153±0.704 | 1.70E-04 |
| cg22533573 | 11 | 32452771  | WT1       | -2.192±0.476 | -1.568±0.985 | 1.70E-04 |
| cg02046340 | 20 | 48552742  | RNF114    | -3.84±0.361  | -4.161±0.443 | 1.70E-04 |
| cg13314167 | 9  | 114557553 | 0         | 3.099±0.301  | 2.467±1.051  | 1.70E-04 |
| cg06391660 | 2  | 74608183  | DCTN1     | 3.036±0.194  | 2.855±0.256  | 1.70E-04 |
| cg00059225 | 5  | 151304357 | GLRA1     | -0.583±0.236 | -0.194±0.635 | 1.70E-04 |
| cg17530977 | 7  | 42275872  | GLI3      | -4.612±0.431 | -3.981±1.015 | 1.71E-04 |
| cg02192855 | 6  | 26273199  | HIST1H2BI | -4.536±0.51  | -3.59±1.559  | 1.71E-04 |
| cg07465609 | 6  | 66205227  | EYS       | 1.736±0.313  | 1.221±0.842  | 1.72E-04 |
| cg13506226 | 13 | 48990685  | LPAR6     | 1.559±0.201  | 1.391±0.221  | 1.72E-04 |
| cg07378350 | 20 | 34027324  | GDF5      | -0.095±0.327 | -0.566±0.757 | 1.72E-04 |
| cg27401095 | 19 | 58977904  | ZNF324    | -0.017±0.211 | -0.403±0.637 | 1.72E-04 |
| cg05492845 | 11 | 64002298  | VEGFB     | -5.64±0.46   | -5.22±0.589  | 1.73E-04 |
| cg19147390 | 19 | 4911058   | UHRF1     | -1.65±0.255  | -2.227±0.964 | 1.73E-04 |
| cg18219418 | 15 | 72563529  | PARP6     | 1.804±0.229  | 2.122±0.508  | 1.73E-04 |
| cg26054540 | 5  | 1009204   | NKD2      | -6.05±1.234  | -4.579±2.279 | 1.73E-04 |
| cg03578041 | 15 | 71147307  | LARP6     | -0.776±0.201 | -1.19±0.687  | 1.73E-04 |
| cg19680672 | 10 | 131412579 | MGMT      | 1.685±0.236  | 1.407±0.431  | 1.73E-04 |
| cg09212468 | 16 | 57728632  | CCDC135   | -2.428±0.277 | -2.783±0.558 | 1.74E-04 |
| cg00297584 | 12 | 116971031 | LINC00173 | -2.948±0.267 | -3.412±0.762 | 1.74E-04 |
| cg05243874 | 15 | 84898042  | LOC388152 | -3.973±0.278 | -4.228±0.359 | 1.74E-04 |
| cg04785227 | 15 | 32321637  | CHRNA7    | -4.606±0.382 | -4.11±0.782  | 1.74E-04 |
| cg03190825 | 19 | 16045788  | CYP4F11   | -0.264±0.365 | -0.676±0.63  | 1.75E-04 |
| cg23670203 | 6  | 36515856  | STK38     | 2.211±0.295  | 1.84±0.583   | 1.75E-04 |
| cg13062935 | 11 | 19082514  | MRGPRX2   | 0.266±0.368  | -0.304±0.925 | 1.75E-04 |
| cg17191178 | 3  | 157824217 | SHOX2     | -3.496±0.518 | -2.576±1.515 | 1.75E-04 |
| cg19516009 | 8  | 22018080  | SFTPC     | 1.476±0.272  | 1.814±0.53   | 1.77E-04 |
| cg12681402 | 12 | 113229989 | RPH3A     | -2.483±0.401 | -1.982±0.785 | 1.77E-04 |
| cg04618528 | 17 | 39645876  | KRT36     | 2.683±0.213  | 2.425±0.402  | 1.78E-04 |
| cg15453943 | 5  | 104434827 | RAB9BP1   | 2.218±0.258  | 1.89±0.516   | 1.78E-04 |
| cg26059153 | 20 | 13976190  | MACROD2   | -3.54±0.902  | -2.546±1.51  | 1.78E-04 |
| cg13696887 | 12 | 52800423  | KRT82     | 3.256±0.314  | 2.765±0.8    | 1.78E-04 |
| cg03316864 | 19 | 17906309  | B3GNT3    | -2.578±0.399 | -2.114±0.716 | 1.78E-04 |
| cg11594137 | 9  | 91605981  | C9orf47   | -1.979±0.389 | -1.394±0.947 | 1.79E-04 |
| cg14043602 | 17 | 3301340   | OR1E1     | -1.353±0.185 | -1.649±0.484 | 1.79E-04 |
| cg14795968 | 2  | 211089815 | ACADL     | -3.061±0.88  | -2.114±1.43  | 1.79E-04 |
| cg24690731 | 8  | 10589093  | SOX7      | -1.103±0.293 | -1.61±0.833  | 1.79E-04 |
| cg09150117 | 7  | 96653867  | DLX5      | -3.852±0.515 | -3.072±1.265 | 1.79E-04 |
| cg15210427 | 20 | 23548991  | CST9L     | 0.298±0.218  | -0.123±0.699 | 1.79E-04 |
| cg10545682 | 1  | 151512625 | TUFT1     | -4.921±0.354 | -5.208±0.371 | 1.79E-04 |
| cg05288803 | 22 | 33198055  | TIMP3     | -5.372±0.902 | -4.341±1.586 | 1.81E-04 |
| cg05393484 | 11 | 6818466   | OR6A2     | 2.317±0.371  | 1.853±0.729  | 1.81E-04 |
| cg00131557 | 13 | 43596656  | DNAJC15   | 3.028±0.267  | 2.746±0.424  | 1.81E-04 |
| cg15242570 | 9  | 90341048  | CTSL      | -2.995±0.692 | -2.404±0.798 | 1.82E-04 |
| cg15096123 | 19 | 51413937  | KLK4      | 2.452±0.295  | 1.976±0.777  | 1.82E-04 |

|            |    |           |           |              |              |          |
|------------|----|-----------|-----------|--------------|--------------|----------|
| cg07660236 | 6  | 28367883  | ZSCAN12   | -3.034±0.342 | -2.297±1.234 | 1.82E-04 |
| cg26240939 | 16 | 20913414  | LYRM1     | 0.352±0.291  | -0.102±0.74  | 1.82E-04 |
| cg06090864 | 19 | 35842448  | FFAR1     | 3.516±0.501  | 2.949±0.87   | 1.82E-04 |
| cg10057065 | 1  | 155292227 | RUSC1     | -1.985±0.447 | -1.451±0.832 | 1.83E-04 |
| cg07714374 | 18 | 53255577  | TCF4      | -2.427±0.436 | -1.799±1.014 | 1.83E-04 |
| cg09276978 | 20 | 34995517  | DLGAP4    | 1.92±0.216   | 1.458±0.774  | 1.83E-04 |
| cg12022621 | 1  | 203734505 | LAX1      | -0.793±0.211 | -1.22±0.713  | 1.84E-04 |
| cg04369341 | 20 | 42545022  | TOX2      | -2.647±0.367 | -1.995±1.077 | 1.84E-04 |
| cg10501128 | 13 | 29069100  | FLT1      | -5.281±0.659 | -4.384±1.436 | 1.84E-04 |
| cg12044210 | 15 | 29213858  | APBA2     | 2.928±0.35   | 2.541±0.59   | 1.84E-04 |
| cg00520135 | 15 | 63333846  | TPM1      | 2.039±0.324  | 2.507±0.755  | 1.85E-04 |
| cg03473294 | 20 | 13619704  | TASP1     | -5.021±0.349 | -5.314±0.391 | 1.85E-04 |
| cg03819692 | 16 | 89225639  | LINC00304 | 0.045±0.372  | 0.596±0.894  | 1.85E-04 |
| cg12949760 | 11 | 2542862   | KCNQ1     | 0.98±0.306   | 0.493±0.797  | 1.86E-04 |
| cg26312920 | 7  | 31380390  | NEUROD6   | 0.505±0.243  | 0.007±0.831  | 1.86E-04 |
| cg01550148 | 5  | 134735544 | H2AFY     | 0.337±0.193  | 0.706±0.614  | 1.87E-04 |
| cg21416022 | 15 | 99789661  | TTC23     | -2.394±0.452 | -1.757±1.026 | 1.89E-04 |
| cg03543593 | 6  | 32076417  | TNXB      | -1.875±0.412 | -1.379±0.775 | 1.89E-04 |
| cg26565975 | 21 | 31988616  | KRTAP20-1 | 2.868±0.356  | 2.359±0.823  | 1.89E-04 |
| cg07826255 | 17 | 48243707  | SGCA      | -1.065±0.311 | -1.497±0.696 | 1.89E-04 |
| cg01386493 | 8  | 37824529  | ADRB3     | -1.484±0.351 | -1.018±0.745 | 1.89E-04 |
| cg21835643 | 20 | 43935361  | RBPJL     | -1.279±0.322 | -0.773±0.829 | 1.89E-04 |
| cg10157098 | 7  | 128354967 | FAM71F1   | 1.076±0.352  | 1.509±0.682  | 1.90E-04 |
| cg04731384 | 16 | 90076766  | DBNDD1    | 1.43±0.251   | 1.059±0.603  | 1.90E-04 |
| cg20226593 | 15 | 48498485  | SLC12A1   | 1.499±0.319  | 1.072±0.683  | 1.90E-04 |
| cg20318748 | 20 | 25605178  | NANP      | -2.197±0.384 | -2.617±0.642 | 1.91E-04 |
| cg03143849 | 11 | 2904951   | CDKN1C    | -0.97±0.338  | -0.54±0.681  | 1.91E-04 |
| cg08995424 | 12 | 54070891  | ATP5G2    | -4.393±0.479 | -3.28±1.878  | 1.92E-04 |
| cg11386709 | 6  | 131278559 | EPB41L2   | 2.783±0.426  | 2.243±0.855  | 1.92E-04 |
| cg03465320 | 6  | 32823078  | PSMB9     | -0.62±0.314  | -1.082±0.75  | 1.93E-04 |
| cg07013734 | 11 | 101454683 | TRPC6     | -4.138±0.546 | -3.548±0.898 | 1.94E-04 |
| cg27015047 | 10 | 124320805 | DMBT1     | 1.152±0.315  | 0.651±0.821  | 1.94E-04 |
| cg25681177 | 19 | 36024313  | GAPDHS    | -2.742±0.471 | -2.241±0.759 | 1.94E-04 |
| cg06656924 | 6  | 35228319  | ZNF76     | -1.588±0.368 | -1.176±0.635 | 1.96E-04 |
| cg19561186 | 3  | 108673045 | GUCA1C    | 0.93±0.324   | 0.509±0.662  | 1.96E-04 |
| cg02512860 | 7  | 100880751 | CLDN15    | 1.169±0.353  | 1.589±0.656  | 1.96E-04 |
| cg00816620 | 1  | 185127501 | SWT1      | -1.876±0.357 | -1.46±0.648  | 1.97E-04 |
| cg18769818 | 11 | 72433059  | ARAP1     | -3.753±0.336 | -2.752±1.706 | 1.97E-04 |
| cg09542291 | 1  | 152850992 | SMCP      | 2.388±0.288  | 1.945±0.725  | 1.97E-04 |
| cg01789267 | 15 | 45545111  | SLC28A2   | 1.652±0.305  | 1.36±0.424   | 1.97E-04 |
| cg18432384 | 11 | 61248084  | PPP1R32   | 2.556±0.283  | 2.237±0.494  | 1.97E-04 |
| cg03874127 | 6  | 109169135 | ARMC2     | 1.267±0.346  | 0.771±0.805  | 1.97E-04 |
| cg18392482 | 12 | 96338011  | AMDHD1    | 2.154±0.393  | 1.644±0.813  | 1.97E-04 |
| cg18130069 | 4  | 3315422   | RGS12     | 3.018±0.227  | 2.742±0.435  | 1.98E-04 |
| cg11402505 | 19 | 39523436  | FBXO27    | -2.089±0.435 | -2.443±0.466 | 1.98E-04 |
| cg22179082 | 13 | 27334259  | GPR12     | -2.903±0.346 | -2.276±1.043 | 1.98E-04 |
| cg07127957 | 10 | 75411571  | SYNPO2L   | 1.391±0.22   | 1.675±0.453  | 1.99E-04 |
| cg09354331 | 10 | 80961382  | ZMIZ1     | 2.356±0.322  | 2.004±0.538  | 1.99E-04 |
| cg18636641 | 9  | 134165268 | PPAPDC3   | 1.07±0.271   | 1.378±0.477  | 1.99E-04 |
| cg07107453 | 1  | 79114976  | IFI44     | -1.262±0.243 | -1.624±0.59  | 2.00E-04 |
| cg15599064 | 6  | 26285655  | HIST1H4H  | -1.8±0.4     | -1.261±0.868 | 2.00E-04 |
| cg21991396 | 1  | 247581417 | NLRP3     | 1.853±0.389  | 1.185±1.107  | 2.00E-04 |
| cg24674220 | 20 | 62251901  | GMEB2     | 1.692±0.207  | 2.018±0.536  | 2.00E-04 |
| cg03087937 | 11 | 26593556  | MUC15     | 1.482±0.259  | 0.877±1.026  | 2.01E-04 |
| cg16614500 | 11 | 694704    | TMEM80    | -3.175±0.409 | -3.623±0.687 | 2.01E-04 |
| cg20322977 | 10 | 94821085  | CYP26C1   | 0.101±0.154  | 0.378±0.462  | 2.02E-04 |
| cg20006825 | 12 | 6874964   | PTMS      | -3.144±0.408 | -2.658±0.763 | 2.02E-04 |
| cg15796941 | 12 | 107711872 | BTBD11    | -3.446±0.457 | -2.769±1.104 | 2.02E-04 |
| cg04819539 | 12 | 58167550  | METTL21B  | 1.764±0.209  | 1.938±0.234  | 2.02E-04 |
| cg07973967 | 17 | 62009607  | CD79B     | 0.612±0.503  | -0.047±1.056 | 2.02E-04 |
| cg24469977 | 7  | 132333391 | PLXNA4    | 2.349±0.341  | 1.869±0.777  | 2.03E-04 |
| cg19777783 | 12 | 129309376 | SLC15A4   | 0.747±0.286  | 0.313±0.711  | 2.03E-04 |
| cg20089715 | 17 | 37354769  | CACNB1    | 2.134±0.193  | 1.811±0.536  | 2.04E-04 |
| cg18797282 | 3  | 50387146  | CYB561D2  | 3.53±0.163   | 3.38±0.217   | 2.05E-04 |
| cg14580567 | 4  | 145567271 | HHIP-AS1  | -3.056±0.753 | -2.339±1.045 | 2.05E-04 |
| cg16174071 | 10 | 47746195  | ANXA8L1   | 1.904±0.282  | 1.687±0.272  | 2.05E-04 |
| cg03098643 | 4  | 187644620 | FAT1      | -2.143±0.603 | -1.577±0.819 | 2.06E-04 |

|            |    |           |                  |              |              |          |
|------------|----|-----------|------------------|--------------|--------------|----------|
| cg03104936 | 7  | 50849168  | <i>GRB10</i>     | 1.069±0.302  | 1.502±0.704  | 2.06E-04 |
| cg20557104 | 19 | 41934313  | <i>B3GNT8</i>    | -2.601±0.262 | -1.975±1.064 | 2.06E-04 |
| cg16626670 | 19 | 7797031   | <i>CLEC4G</i>    | 0.55±0.171   | 0.91±0.607   | 2.07E-04 |
| cg19693403 | 3  | 119962884 | <i>GPR156</i>    | 3.222±0.256  | 2.942±0.43   | 2.07E-04 |
| cg24857721 | 1  | 25599055  | <i>RHD</i>       | 0.966±0.218  | 1.257±0.469  | 2.07E-04 |
| cg13338132 | 12 | 100041984 | <i>FAM71C</i>    | 3.088±0.309  | 2.502±0.983  | 2.09E-04 |
| cg20895877 | 14 | 94254586  | <i>PRIMA1</i>    | -3.171±0.486 | -2.461±1.158 | 2.09E-04 |
| cg02399455 | 7  | 87855714  | <i>SRI</i>       | 3.239±0.289  | 2.633±1.023  | 2.09E-04 |
| cg13877915 | 19 | 58951672  | <i>ZNF132</i>    | -5.158±0.908 | -3.862±2.11  | 2.10E-04 |
| cg15767406 | 3  | 44626029  | <i>ZNF660</i>    | -4.819±0.441 | -4.217±0.973 | 2.10E-04 |
| cg16660041 | 3  | 51938430  | <i>IQCF1</i>     | 1.842±0.233  | 1.397±0.746  | 2.10E-04 |
| cg18881501 | 17 | 21187376  | <i>MAP2K3</i>    | -1.213±0.407 | -1.645±0.658 | 2.10E-04 |
| cg24794531 | 3  | 142443837 | <i>TRPC1</i>     | -3.618±0.436 | -3.123±0.771 | 2.10E-04 |
| cg09526693 | 4  | 123378308 | <i>IL2</i>       | 0.86±0.243   | 1.229±0.607  | 2.11E-04 |
| cg19728577 | 1  | 42619163  | <i>GUCA2B</i>    | 1.95±0.359   | 1.473±0.769  | 2.11E-04 |
| cg10775273 | 2  | 219857927 | <i>CRYBA2</i>    | -5.744±0.847 | -4.811±1.439 | 2.12E-04 |
| cg18142353 | 12 | 12420574  | <i>LRP6</i>      | -2.741±0.332 | -2.404±0.508 | 2.13E-04 |
| cg23471482 | 16 | 57392198  | <i>CCL22</i>     | 2.119±0.324  | 1.782±0.511  | 2.13E-04 |
| cg03634982 | 11 | 60047979  | <i>MS4A4A</i>    | 0.439±0.403  | -0.141±0.948 | 2.13E-04 |
| cg25836301 | 14 | 101292306 | <i>MEG3</i>      | 0.212±0.121  | 0.451±0.402  | 2.14E-04 |
| cg16714091 | 9  | 18473902  | <i>ADAMTSL1</i>  | -1.654±0.328 | -1.07±0.977  | 2.14E-04 |
| cg09914444 | 1  | 46972183  | <i>DMBX1</i>     | 0.047±0.446  | -0.51±0.889  | 2.15E-04 |
| cg20546002 | 5  | 178017376 | <i>COL23A1</i>   | -5.001±0.6   | -4.12±1.443  | 2.16E-04 |
| cg19614321 | 20 | 4804581   | <i>RASSF2</i>    | -2.477±0.379 | -1.9±0.95    | 2.18E-04 |
| cg04845579 | 8  | 70378673  | <i>SULF1</i>     | -1.131±0.355 | -1.71±0.961  | 2.18E-04 |
| cg05067973 | 20 | 360745    | <i>TRIB3</i>     | 3.898±0.207  | 3.561±0.559  | 2.19E-04 |
| cg17105014 | 2  | 127413363 | <i>GYPC</i>      | -2.283±0.421 | -1.659±1.023 | 2.19E-04 |
| cg12004206 | 9  | 138987102 | <i>NACC2</i>     | -4.08±0.497  | -3.544±0.824 | 2.19E-04 |
| cg20469837 | 2  | 158114300 | <i>GALNT5</i>    | -1.356±0.337 | -0.983±0.579 | 2.19E-04 |
| cg08670691 | 1  | 3668942   | <i>CCDC27</i>    | 0.638±0.253  | 0.266±0.612  | 2.19E-04 |
| cg00143998 | 1  | 228645859 | <i>HIST3H2BB</i> | -4.22±0.399  | -3.192±1.759 | 2.20E-04 |
| cg02803836 | 10 | 131412507 | <i>MGMT</i>      | 3.264±0.281  | 2.937±0.514  | 2.20E-04 |
| cg11540997 | 15 | 45407818  | <i>DUOXA2</i>    | 0.307±0.13   | 0.477±0.275  | 2.20E-04 |
| cg11016563 | 11 | 101454626 | <i>TRPC6</i>     | -3.159±0.35  | -2.751±0.641 | 2.20E-04 |
| cg18152517 | 7  | 134915756 | <i>STRA8</i>     | 2.352±0.236  | 1.996±0.587  | 2.21E-04 |
| cg17342283 | 10 | 70847882  | <i>SRGN</i>      | -3.005±0.379 | -2.361±1.075 | 2.22E-04 |
| cg07090813 | 1  | 120254330 | <i>PHGDH</i>     | -1.583±0.253 | -1.972±0.644 | 2.23E-04 |
| cg05421673 | 17 | 54671575  | <i>NOG</i>       | -3.562±0.374 | -3.1±0.739   | 2.25E-04 |
| cg03945800 | 16 | 4165515   | <i>ADCY9</i>     | -3.165±0.513 | -2.562±0.953 | 2.25E-04 |
| cg02097420 | 3  | 186383874 | <i>HRG</i>       | 2.202±0.303  | 2.472±0.382  | 2.25E-04 |
| cg19105504 | 11 | 60524472  | <i>MS4A15</i>    | -0.393±0.428 | -1.019±1.028 | 2.25E-04 |
| cg26956535 | 12 | 6880640   | <i>LAG3</i>      | 3.046±0.269  | 2.788±0.38   | 2.26E-04 |
| cg01910481 | 20 | 31824068  | <i>BPIFA1</i>    | 2.515±0.265  | 2.069±0.745  | 2.26E-04 |
| cg08108311 | 17 | 40932746  | <i>WNK4</i>      | -4.509±0.69  | -3.51±1.639  | 2.26E-04 |
| cg16509569 | 12 | 54891634  | <i>NCKAP1L</i>   | 0.937±0.422  | 0.384±0.894  | 2.27E-04 |
| cg01946401 | 6  | 45296101  | <i>RUNX2</i>     | 0.333±0.296  | -0.257±1     | 2.28E-04 |
| cg03301801 | 1  | 109264283 | <i>FNDC7</i>     | 2.074±0.282  | 1.557±0.872  | 2.30E-04 |
| cg00027083 | 18 | 5543801   | <i>EPB41L3</i>   | -1.155±1.359 | -0.09±1.377  | 2.30E-04 |
| cg22215728 | 3  | 61236652  | <i>FHIT</i>      | -1.693±0.402 | -2.157±0.732 | 2.30E-04 |
| cg06866657 | 9  | 124990754 | <i>LHX6</i>      | -3.667±0.279 | -3.155±0.863 | 2.30E-04 |
| cg26401870 | 8  | 21882439  | <i>NPM2</i>      | -2.314±0.455 | -1.815±0.775 | 2.30E-04 |
| cg23655719 | 9  | 34692578  | <i>CCL19</i>     | 2.896±0.24   | 2.659±0.355  | 2.31E-04 |
| cg15526708 | 9  | 101866433 | <i>TGFBR1</i>    | -3.144±0.478 | -2.538±0.975 | 2.32E-04 |
| cg08008403 | 1  | 197881741 | <i>LHX9</i>      | -3.709±0.358 | -3.156±0.916 | 2.32E-04 |
| cg25167838 | 7  | 155605092 | <i>SHH</i>       | -5.615±0.663 | -4.664±1.562 | 2.32E-04 |
| cg05468303 | 22 | 18894389  | <i>DGCR6</i>     | -2.208±0.303 | -2.643±0.713 | 2.33E-04 |
| cg23322523 | 8  | 67039041  | <i>TRIM55</i>    | 0.113±0.284  | 0.599±0.814  | 2.33E-04 |
| cg01344171 | 6  | 43612647  | <i>RSPH9</i>     | -0.306±0.282 | 0.22±0.888   | 2.33E-04 |
| cg04592706 | 1  | 94586592  | <i>ABCA4</i>     | 2.963±0.288  | 2.65±0.486   | 2.33E-04 |
| cg20951539 | 6  | 36367819  | <i>PXT1</i>      | 1.211±0.288  | 0.771±0.73   | 2.35E-04 |
| cg00892798 | 17 | 47572909  | <i>NGFR</i>      | -4.294±0.349 | -3.342±1.64  | 2.35E-04 |
| cg09971811 | 20 | 24930099  | <i>CST7</i>      | 1.885±0.437  | 1.067±1.382  | 2.36E-04 |
| cg09149294 | 15 | 98503793  | <i>ARRDC4</i>    | -5.086±0.602 | -4.441±0.996 | 2.36E-04 |
| cg17307280 | 5  | 174871636 | <i>DRD1</i>      | -3.936±0.574 | -3.213±1.164 | 2.36E-04 |
| cg20573420 | 19 | 35451129  | <i>ZNF792</i>    | 2.011±0.49   | 2.406±0.526  | 2.36E-04 |
| cg19682367 | 3  | 188888486 | <i>TPRG1</i>     | -1.165±0.426 | -0.611±0.897 | 2.36E-04 |
| cg10328573 | 17 | 39728221  | <i>KRT9</i>      | -0.502±0.262 | -0.132±0.607 | 2.37E-04 |

|            |    |           |          |              |              |          |
|------------|----|-----------|----------|--------------|--------------|----------|
| cg21624359 | 19 | 35848801  | FFAR3    | 0.564±0.263  | 0.075±0.826  | 2.38E-04 |
| cg23464269 | 2  | 234637667 | UGT1A3   | 0.098±0.194  | -0.311±0.697 | 2.39E-04 |
| cg00327483 | 1  | 160160587 | CASQ1    | 3.846±0.276  | 3.523±0.513  | 2.39E-04 |
| cg22821324 | 4  | 176923439 | GPM6A    | -3.748±0.411 | -3.046±1.18  | 2.40E-04 |
| cg18602314 | 5  | 179780802 | GFPT2    | -5.548±0.541 | -4.877±1.078 | 2.40E-04 |
| cg22736354 | 6  | 18122719  | NHLRC1   | -1.602±0.311 | -2.02±0.682  | 2.41E-04 |
| cg08897388 | 6  | 112575705 | LAMA4    | -2.92±0.464  | -2.32±0.972  | 2.41E-04 |
| cg20535085 | 1  | 160616604 | SLAMF1   | 1.115±0.424  | 0.588±0.848  | 2.42E-04 |
| cg14538332 | 8  | 97506180  | SDC2     | -3.682±0.227 | -3.196±0.831 | 2.43E-04 |
| cg15433631 | 5  | 2751541   | IRX2     | -1.273±0.693 | -0.569±1.072 | 2.45E-04 |
| cg00413066 | 15 | 52405464  | BCL2L10  | 2.061±0.321  | 2.359±0.435  | 2.45E-04 |
| cg00282347 | 1  | 6241040   | CHD5     | -3.68±0.321  | -2.975±1.208 | 2.45E-04 |
| cg22764925 | 22 | 24979964  | GGT1     | -1.526±0.364 | -1.092±0.693 | 2.45E-04 |
| cg16152813 | 16 | 30042407  | FAM57B   | -3.981±0.351 | -3.55±0.692  | 2.46E-04 |
| cg01291404 | 12 | 48397872  | COL2A1   | -4.252±0.35  | -3.489±1.307 | 2.48E-04 |
| cg02902770 | 7  | 150039406 | RARRES2  | 2.124±0.254  | 1.627±0.846  | 2.49E-04 |
| cg21435336 | 19 | 17392852  | ANKLE1   | -4.119±0.341 | -3.407±1.216 | 2.49E-04 |
| cg17430393 | 2  | 17722068  | VSNL1    | -5.325±0.541 | -4.384±1.588 | 2.49E-04 |
| cg19219437 | 3  | 142607715 | PCOLCE2  | -4.452±0.528 | -3.873±0.906 | 2.49E-04 |
| cg05316065 | 8  | 130799007 | GSDMC    | -1.117±0.211 | -1.499±0.647 | 2.49E-04 |
| cg24091474 | 19 | 36399185  | TYROBP   | 0.385±0.377  | 0.989±1.011  | 2.50E-04 |
| cg23205633 | 17 | 39334352  | KRTAP4-2 | 1.05±0.175   | 1.256±0.327  | 2.50E-04 |
| cg03109701 | 12 | 117174758 | C12orf49 | 0.033±0.21   | -0.325±0.604 | 2.50E-04 |
| cg26796283 | 5  | 174151334 | MSX2     | -3.391±0.444 | -2.757±1.049 | 2.51E-04 |
| cg23984434 | 11 | 106888656 | GUCY1A2  | -3.442±0.513 | -2.485±1.626 | 2.51E-04 |
| cg14409958 | 8  | 120651652 | ENPP2    | -3.912±0.586 | -3.22±1.104  | 2.51E-04 |
| cg14704941 | 11 | 19224659  | CSRP3    | 3.133±0.328  | 2.636±0.827  | 2.52E-04 |
| cg19836283 | 15 | 68724690  | ITGA11   | -3.772±0.458 | -3.166±0.989 | 2.53E-04 |
| cg13574590 | 12 | 4382141   | CCND2    | -4.209±0.333 | -3.557±1.114 | 2.54E-04 |
| cg03693099 | 9  | 135936901 | CEL      | 1.342±0.264  | 1.561±0.299  | 2.54E-04 |
| cg14435807 | 15 | 74218780  | LOXL1    | -1.283±0.422 | -0.779±0.807 | 2.54E-04 |
| cg06776256 | 12 | 13043728  | GPRC5A   | -1.701±0.231 | -0.222±0.53  | 2.54E-04 |
| cg14519350 | 22 | 30661949  | OSM      | 0.889±0.283  | 0.537±0.57   | 2.55E-04 |
| cg18488855 | 14 | 27066634  | NOVA1    | -3.928±0.402 | -3.333±0.989 | 2.55E-04 |
| cg25953146 | 2  | 132558939 | C2orf27B | 1.761±0.206  | 1.508±0.408  | 2.55E-04 |
| cg25553916 | 5  | 177558755 | RMND5B   | 0.447±0.186  | 0.095±0.599  | 2.56E-04 |
| cg07038400 | 3  | 135684163 | PPP2R3A  | -1.56±0.44   | -1.07±0.771  | 2.56E-04 |
| cg19815720 | 3  | 183770650 | HTR3C    | -0.081±0.256 | 0.321±0.672  | 2.56E-04 |
| cg10895130 | 1  | 151007925 | BNIP1    | 2.014±0.262  | 2.347±0.541  | 2.57E-04 |
| cg26258845 | 2  | 207308087 | ADAM23   | -5.346±0.607 | -4.362±1.654 | 2.57E-04 |
| cg21950518 | 5  | 55290746  | IL6ST    | -3.428±0.479 | -2.894±0.841 | 2.57E-04 |
| cg04030848 | 22 | 30960881  | GAL3ST1  | 0.101±0.216  | 0.433±0.556  | 2.58E-04 |
| cg19001226 | 2  | 177053345 | HOXD1    | -3.306±0.714 | -2.666±0.924 | 2.58E-04 |
| cg19162158 | 8  | 32405427  | NRG1     | -3.536±0.681 | -2.759±1.232 | 2.58E-04 |
| cg06905514 | 7  | 44364941  | CAMK2B   | -4.613±0.997 | -3.279±2.187 | 2.58E-04 |
| cg25156443 | 10 | 99531929  | SFRP5    | -2.037±0.357 | -1.527±0.845 | 2.59E-04 |
| cg16408970 | 10 | 28965584  | BAMBI    | -2.41±0.243  | -1.855±0.957 | 2.59E-04 |
| cg00472814 | 21 | 28217676  | ADAMTS1  | -4.209±0.697 | -3.332±1.422 | 2.60E-04 |
| cg22215192 | 1  | 104160257 | AMY2A    | 1.762±0.197  | 1.329±0.746  | 2.60E-04 |
| cg07638935 | 10 | 102821427 | KAZALD1  | -2.264±0.399 | -2.839±0.954 | 2.61E-04 |
| cg26980692 | 11 | 60719947  | SLC15A3  | -2.521±0.431 | -2.078±0.682 | 2.61E-04 |
| cg11822932 | 11 | 33913716  | LMO2     | 1.73±0.311   | 1.155±0.979  | 2.61E-04 |
| cg06778853 | 1  | 6672620   | PHF13    | -1.592±0.304 | -2.078±0.816 | 2.62E-04 |
| cg19632760 | 8  | 71581729  | XKR9     | -0.372±0.155 | -0.667±0.504 | 2.62E-04 |
| cg04614339 | 1  | 196743672 | CFHR3    | 0.115±0.336  | -0.331±0.73  | 2.62E-04 |
| cg04569233 | 3  | 39321449  | CX3CR1   | 0.519±0.197  | 0.149±0.631  | 2.62E-04 |
| cg21019522 | 11 | 2920789   | SLC22A18 | -0.846±0.254 | -0.438±0.686 | 2.62E-04 |
| cg13633026 | 11 | 60466573  | MS4A8    | 1.065±0.283  | 0.637±0.714  | 2.62E-04 |
| cg15339605 | 7  | 115670795 | TFEC     | -2.835±0.362 | -3.234±0.628 | 2.62E-04 |
| cg16879596 | 7  | 99277978  | CYP3A5   | 1.539±0.259  | 1.052±0.831  | 2.62E-04 |
| cg12870705 | 10 | 33624623  | NRP1     | -4.173±0.919 | -3.37±1.147  | 2.62E-04 |
| cg11885098 | 19 | 1285397   | EFNA2    | -1.705±0.317 | -1.175±0.896 | 2.65E-04 |
| cg23234999 | 15 | 23811205  | MKRN3    | 2.135±0.283  | 1.756±0.624  | 2.65E-04 |
| cg14094960 | 7  | 55086890  | EGFR     | -3.511±1.162 | -2.585±1.239 | 2.66E-04 |
| cg14590817 | 10 | 1779730   | ADARB2   | -4.371±0.327 | -3.8±0.969   | 2.66E-04 |
| cg14345676 | 5  | 175109098 | HRH2     | 0.748±0.339  | 1.104±0.552  | 2.66E-04 |
| cg13960192 | 19 | 3093904   | GNA11    | -3.108±0.387 | -2.681±0.673 | 2.67E-04 |

|            |    |           |            |              |              |          |
|------------|----|-----------|------------|--------------|--------------|----------|
| cg13264741 | 12 | 14133426  | GRIN2B     | -4.072±0.425 | -3.412±1.107 | 2.67E-04 |
| cg15837252 | 22 | 19138822  | GSC2       | -2.191±0.334 | -1.67±0.874  | 2.68E-04 |
| cg15755548 | 16 | 331050    | ARHGDIG    | -3.433±0.345 | -2.809±1.064 | 2.68E-04 |
| cg12331389 | 10 | 95360736  | RBP4       | -3.333±0.769 | -2.442±1.423 | 2.70E-04 |
| cg00406188 | 1  | 152647216 | LCE2C      | 1.43±0.289   | 0.976±0.765  | 2.72E-04 |
| cg10615091 | 10 | 61122313  | FAM13C     | -4.739±0.462 | -4.201±0.862 | 2.72E-04 |
| cg15988792 | 20 | 25039314  | ACSS1      | -3.35±0.513  | -2.565±1.317 | 2.72E-04 |
| cg22224704 | 11 | 67352041  | GSTP1      | -1.622±0.4   | -1.062±0.929 | 2.73E-04 |
| cg04645342 | 1  | 72748124  | NEGR1      | -3.834±0.32  | -3.044±1.372 | 2.73E-04 |
| cg22580173 | 15 | 39873304  | THBS1      | -4.62±0.472  | -4.181±0.65  | 2.74E-04 |
| cg09052983 | 18 | 52495605  | RAB27B     | -4.148±0.387 | -3.785±0.541 | 2.75E-04 |
| cg22264436 | 17 | 41836423  | SOST       | 1.586±0.342  | 1.079±0.849  | 2.76E-04 |
| cg06883149 | 18 | 47901188  | SKA1       | -4.841±0.407 | -5.176±0.463 | 2.76E-04 |
| cg11346450 | 2  | 234638043 | UGT1A3     | 2.061±0.219  | 1.715±0.584  | 2.77E-04 |
| cg03640944 | 10 | 106093819 | ITPRIP     | 1.361±0.325  | 1.672±0.469  | 2.78E-04 |
| cg16601385 | 19 | 858846    | CFD        | 1.043±0.223  | 0.734±0.511  | 2.78E-04 |
| cg03498559 | 4  | 70361062  | UGT2B4     | 1.637±0.303  | 1.356±0.419  | 2.80E-04 |
| cg07285953 | 17 | 27572551  | CRYBA1     | 3.112±0.234  | 2.91±0.288   | 2.81E-04 |
| cg25141674 | 6  | 72130689  | LINC00472  | -2.684±0.585 | -1.929±1.239 | 2.81E-04 |
| cg19399100 | 4  | 70519695  | UGT2A1     | 0.668±0.233  | 0.939±0.436  | 2.82E-04 |
| cg06193397 | 8  | 120651069 | ENPP2      | -2.733±0.332 | -2.18±0.938  | 2.82E-04 |
| cg19096540 | 5  | 133748191 | CDKN2AIPNL | -1.927±0.277 | -2.231±0.48  | 2.83E-04 |
| cg09539438 | 9  | 87283789  | NTRK2      | -4.464±0.322 | -3.778±1.186 | 2.83E-04 |
| cg16652259 | 2  | 172949501 | DLX1       | -2.247±0.377 | -1.459±1.36  | 2.83E-04 |
| cg27596068 | 11 | 75272301  | SERPINH1   | 2.112±0.182  | 1.797±0.537  | 2.85E-04 |
| cg23431988 | 8  | 22132563  | PIWIL2     | 2.456±0.202  | 2.205±0.41   | 2.85E-04 |
| cg07015629 | 2  | 213403212 | ERBB4      | -3.283±0.652 | -2.5±1.267   | 2.86E-04 |
| cg11619390 | 1  | 32931179  | ZBTB8B     | -1.925±0.248 | -1.422±0.868 | 2.86E-04 |
| cg08687163 | 3  | 49940853  | MST1R      | 1.612±0.349  | 1.137±0.789  | 2.87E-04 |
| cg08592761 | 15 | 71146185  | LARP6      | -4.038±0.861 | -3.3±1.051   | 2.87E-04 |
| cg13798289 | 16 | 67875619  | THAP11     | 0.039±0.184  | -0.347±0.667 | 2.87E-04 |
| cg00698688 | 19 | 49055432  | SULT2B1    | 0.675±0.272  | 0.272±0.677  | 2.88E-04 |
| cg08291098 | 20 | 62285239  | STMN3      | -4.299±0.529 | -3.546±1.258 | 2.88E-04 |
| cg16004226 | 11 | 369875    | B4GALNT4   | -3.067±0.343 | -2.437±1.082 | 2.88E-04 |
| cg08965143 | 2  | 24308246  | TP53I3     | -1.928±0.553 | -1.346±0.911 | 2.88E-04 |
| cg14839257 | 6  | 167275999 | RPS6KA2    | -5.959±0.7   | -5.02±1.555  | 2.88E-04 |
| cg23615676 | 5  | 113697632 | KCNN2      | -3.897±0.5   | -3.109±1.333 | 2.90E-04 |
| cg03389164 | 14 | 94423872  | ASB2       | 2.489±0.249  | 2.145±0.574  | 2.91E-04 |
| cg03597525 | 19 | 51920435  | SIGLEC10   | 0.097±0.205  | -0.276±0.641 | 2.93E-04 |
| cg23058901 | 11 | 44324759  | ALX4       | -0.273±0.289 | 0.096±0.606  | 2.94E-04 |
| cg15262984 | 7  | 43965648  | URGCP      | -4.419±0.587 | -4.845±0.525 | 2.94E-04 |
| cg26832211 | 11 | 71259251  | KRTAP5-9   | 1.893±0.254  | 2.288±0.668  | 2.94E-04 |
| cg02658214 | 12 | 57327964  | SDR9C7     | 1.989±0.203  | 1.686±0.509  | 2.94E-04 |
| cg19430430 | 19 | 10121323  | COL5A3     | -4.179±0.419 | -3.65±0.868  | 2.95E-04 |
| cg09411212 | 3  | 119379220 | POPDC2     | 2.699±0.321  | 2.379±0.493  | 2.95E-04 |
| cg01211097 | 16 | 84732969  | USP10      | -0.666±0.267 | -0.993±0.533 | 2.96E-04 |
| cg00888007 | 12 | 4382184   | CCND2      | -4.978±0.433 | -3.822±2.025 | 2.96E-04 |
| cg10092957 | 19 | 39687079  | NCCRP1     | -3.242±0.459 | -2.46±1.336  | 2.96E-04 |
| cg02756698 | 17 | 39023008  | KRT12      | 2.078±0.267  | 1.824±0.384  | 2.97E-04 |
| cg15120942 | 3  | 38071578  | PLCD1      | -1.114±0.282 | -0.739±0.621 | 2.97E-04 |
| cg02995295 | 13 | 51796962  | FAM124A    | -4.385±0.36  | -3.892±0.82  | 2.98E-04 |
| cg11981599 | 8  | 11566526  | GATA4      | -1.133±0.661 | -0.582±0.775 | 2.98E-04 |
| cg06981182 | 10 | 90343208  | RNLS       | -1.763±0.694 | -2.731±1.618 | 2.99E-04 |
| cg00509616 | 15 | 57884415  | GCOM1      | -2.328±0.511 | -1.823±0.777 | 3.00E-04 |
| cg18619267 | 4  | 7940375   | AFAP1      | -4.404±0.508 | -3.909±0.756 | 3.01E-04 |
| cg12067287 | 18 | 3221598   | MYOM1      | 2.029±0.276  | 1.764±0.404  | 3.01E-04 |
| cg26589285 | 19 | 39787011  | IFNL1      | 0.627±0.282  | 0.136±0.841  | 3.02E-04 |
| cg11529128 | 6  | 35772890  | LHFPL5     | -4.3±0.34    | -3.727±0.978 | 3.02E-04 |
| cg26504021 | 5  | 2752882   | C5orf38    | -2.614±0.485 | -1.942±1.122 | 3.02E-04 |
| cg13877465 | 17 | 47074670  | IGF2BP1    | -4.615±0.413 | -3.747±1.508 | 3.02E-04 |
| cg26751195 | 16 | 29673680  | SPN        | 2.329±0.277  | 2.029±0.474  | 3.02E-04 |
| cg26090652 | 11 | 119211440 | C1QTNF5    | -4.519±0.543 | -3.91±0.975  | 3.02E-04 |
| cg11930592 | 4  | 4861820   | MSX1       | -5.445±0.716 | -4.466±1.632 | 3.03E-04 |
| cg18216249 | 12 | 48100805  | RPAP3      | -1.033±0.378 | -1.536±0.835 | 3.04E-04 |
| cg06210526 | 19 | 41619850  | CYP2F1     | 2.283±0.26   | 1.864±0.714  | 3.05E-04 |
| cg04155793 | 16 | 89752847  | CDK10      | -0.23±0.387  | -0.718±0.802 | 3.06E-04 |
| cg20731798 | 11 | 36616365  | C11orf74   | -4.799±0.555 | -4.347±0.627 | 3.06E-04 |

|            |    |           |                  |              |              |          |
|------------|----|-----------|------------------|--------------|--------------|----------|
| cg19979896 | 6  | 150212118 | <i>RAET1E</i>    | -0.572±0.238 | -0.201±0.631 | 3.06E-04 |
| cg08654334 | 2  | 189655589 | <i>DIRC1</i>     | 1.034±0.342  | 0.657±0.601  | 3.06E-04 |
| cg18133957 | 19 | 1450493   | <i>APC2</i>      | 0.381±0.351  | 0.88±0.838   | 3.06E-04 |
| cg20485165 | 20 | 43753049  | <i>WFDC12</i>    | 1.406±0.303  | 0.903±0.859  | 3.06E-04 |
| cg00648883 | 13 | 32524761  | <i>EEF1DP3</i>   | -0.65±0.318  | -1.094±0.745 | 3.06E-04 |
| cg14837082 | 3  | 11294604  | <i>HRH1</i>      | 1.431±0.259  | 1.184±0.375  | 3.09E-04 |
| cg01293647 | 17 | 37764264  | <i>NEUROD2</i>   | -3.9±0.415   | -3.178±1.24  | 3.09E-04 |
| cg13697387 | 1  | 152670843 | <i>LCE2A</i>     | -2.5±0.259   | -2.871±0.623 | 3.10E-04 |
| cg24512973 | 1  | 155161784 | <i>MUC1</i>      | 0.922±0.351  | 0.131±1.38   | 3.10E-04 |
| cg00516481 | 21 | 44073202  | <i>PDE9A</i>     | -2.543±0.403 | -1.922±1.054 | 3.12E-04 |
| cg19246110 | 19 | 58238928  | <i>ZNF671</i>    | -5.047±0.403 | -3.786±2.227 | 3.12E-04 |
| cg15512851 | 6  | 36973518  | <i>FGD2</i>      | 0.86±0.311   | 0.35±0.873   | 3.12E-04 |
| cg01697865 | 11 | 117856007 | <i>IL10RA</i>    | 0.748±0.257  | 0.273±0.821  | 3.12E-04 |
| cg08084415 | 19 | 32836414  | <i>ZNF507</i>    | -3.776±0.328 | -4.032±0.343 | 3.13E-04 |
| cg18879041 | 2  | 110656797 | <i>LIMS3L</i>    | 0.926±0.313  | 1.198±0.394  | 3.13E-04 |
| cg02130905 | 8  | 27116213  | <i>STMN4</i>     | 1.275±0.205  | 0.952±0.551  | 3.14E-04 |
| cg01781266 | 11 | 12398966  | <i>PARVA</i>     | -3.03±0.514  | -2.539±0.748 | 3.14E-04 |
| cg00317680 | 8  | 97274070  | <i>PTDSS1</i>    | -3.098±0.376 | -2.799±0.408 | 3.17E-04 |
| cg13297249 | 2  | 242945663 | <i>0</i>         | 2.247±0.363  | 1.774±0.785  | 3.17E-04 |
| cg17561452 | 16 | 84224707  | <i>ADAD2</i>     | 2.53±0.282   | 2.205±0.525  | 3.17E-04 |
| cg00033516 | 4  | 38666773  | <i>FLJ13197</i>  | -3.966±0.399 | -3.619±0.506 | 3.18E-04 |
| cg18881269 | 12 | 6936267   | <i>LEPREL2</i>   | 1.901±0.252  | 1.516±0.655  | 3.19E-04 |
| cg11846236 | 3  | 48632568  | <i>COL7A1</i>    | -2.733±0.675 | -2.062±1.04  | 3.19E-04 |
| cg19714296 | 1  | 47407400  | <i>CYP4A11</i>   | 2.382±0.184  | 2.123±0.436  | 3.19E-04 |
| cg20541456 | 5  | 156696520 | <i>CYFIP2</i>    | -1.682±0.311 | -2.1±0.698   | 3.20E-04 |
| cg18330203 | 1  | 201346647 | <i>TNNT2</i>     | 1.512±0.212  | 1.117±0.683  | 3.20E-04 |
| cg02794695 | 8  | 134072611 | <i>SLA</i>       | 0.609±0.398  | 0.076±0.89   | 3.21E-04 |
| cg00354572 | 12 | 81471419  | <i>ACSS3</i>     | -3.928±0.314 | -3.479±0.758 | 3.22E-04 |
| cg10065416 | 17 | 41910894  | <i>MPP3</i>      | -4.512±0.481 | -4.028±0.754 | 3.22E-04 |
| cg14310034 | 14 | 54423433  | <i>BMP4</i>      | -4.32±0.545  | -3.568±1.261 | 3.23E-04 |
| cg02309431 | 20 | 31618931  | <i>BPIFB6</i>    | 2.417±0.21   | 2.067±0.6    | 3.23E-04 |
| cg03667047 | 13 | 33589962  | <i>KL</i>        | -1.271±0.275 | -0.692±1.012 | 3.24E-04 |
| cg26524263 | 19 | 51568336  | <i>KLK13</i>     | -4.007±0.49  | -3.477±0.847 | 3.24E-04 |
| cg07894717 | 1  | 10508598  | <i>CORT</i>      | 3.529±0.288  | 3.145±0.641  | 3.25E-04 |
| cg16616769 | 16 | 19727142  | <i>IQCK</i>      | 2.246±0.359  | 1.66±1.005   | 3.27E-04 |
| cg16579646 | 1  | 120048352 | <i>HSD3B1</i>    | 1.919±0.242  | 1.633±0.467  | 3.29E-04 |
| cg00042156 | 10 | 42970842  | <i>LINC00839</i> | 0.928±0.473  | 0.484±0.675  | 3.29E-04 |
| cg02473123 | 17 | 80274776  | <i>CD7</i>       | 2.175±0.262  | 1.858±0.522  | 3.29E-04 |
| cg03742272 | 17 | 7990705   | <i>ALOX12B</i>   | 1.351±0.245  | 0.99±0.612   | 3.30E-04 |
| cg20357806 | 4  | 74853779  | <i>PPBP</i>      | 1.845±0.247  | 1.554±0.477  | 3.30E-04 |
| cg11668844 | 13 | 113655622 | <i>MCF2L</i>     | -1.537±0.612 | -2.097±0.841 | 3.30E-04 |
| cg08532057 | 13 | 25875436  | <i>NUPL1</i>     | -2.172±0.529 | -1.593±0.929 | 3.30E-04 |
| cg19573166 | 14 | 23822408  | <i>SLC22A17</i>  | -2.016±0.307 | -1.558±0.778 | 3.31E-04 |
| cg01593886 | 17 | 48278778  | <i>COL1A1</i>    | -3.477±0.442 | -2.924±0.916 | 3.32E-04 |
| cg17694279 | 9  | 503890    | <i>KANK1</i>     | -2.376±0.219 | -2.612±0.376 | 3.32E-04 |
| cg17237881 | 20 | 61867533  | <i>BIRC7</i>     | 3.017±0.212  | 2.777±0.388  | 3.33E-04 |
| cg05399697 | 2  | 96610206  | <i>0</i>         | 1.329±0.293  | 1.046±0.434  | 3.34E-04 |
| cg05492503 | 17 | 19140765  | <i>EPN2</i>      | -5.153±0.439 | -4.819±0.443 | 3.34E-04 |
| cg22007439 | 9  | 22446972  | <i>DMRTA1</i>    | -5.685±0.661 | -5.116±0.829 | 3.35E-04 |
| cg02856727 | 17 | 61959416  | <i>GH2</i>       | 0.696±0.201  | 0.36±0.578   | 3.35E-04 |
| cg14662172 | 13 | 46679081  | <i>CPB2</i>      | 1.621±0.288  | 1.124±0.857  | 3.35E-04 |
| cg21325760 | 15 | 23891402  | <i>MAGEL2</i>    | 3.682±0.32   | 3.355±0.514  | 3.35E-04 |
| cg24605304 | 12 | 5152766   | <i>KCNA5</i>     | -1.954±0.312 | -2.436±0.822 | 3.36E-04 |
| cg05101920 | 1  | 160040217 | <i>KCNJ10</i>    | -3.506±0.23  | -2.899±1.073 | 3.36E-04 |
| cg02142461 | 4  | 4293079   | <i>ZBTB49</i>    | 0.907±0.293  | 1.249±0.558  | 3.37E-04 |
| cg19250907 | 8  | 68659328  | <i>CPA6</i>      | 2.407±0.238  | 1.888±0.912  | 3.37E-04 |
| cg13169373 | 21 | 27542843  | <i>APP</i>       | -4.146±0.691 | -3.586±0.782 | 3.38E-04 |
| cg02096633 | 9  | 35162499  | <i>UNC13B</i>    | -4.175±0.424 | -3.835±0.472 | 3.39E-04 |
| cg03329572 | 1  | 157523253 | <i>FCRL5</i>     | 2.553±0.442  | 1.999±0.919  | 3.40E-04 |
| cg21948169 | 10 | 70320051  | <i>TET1</i>      | -4.376±0.374 | -3.836±0.917 | 3.40E-04 |
| cg06236276 | 6  | 160680078 | <i>SLC22A2</i>   | 0.954±0.165  | 1.24±0.494   | 3.43E-04 |
| cg09553448 | 9  | 134000424 | <i>NUP214</i>    | -2.171±0.498 | -2.542±0.483 | 3.43E-04 |
| cg17651821 | 6  | 27841683  | <i>HIST1H4L</i>  | -3.843±0.301 | -2.946±1.595 | 3.43E-04 |
| cg20822628 | 20 | 61041592  | <i>GATA5</i>     | 4.26±0.565   | 3.388±1.493  | 3.43E-04 |
| cg01185754 | 1  | 95006729  | <i>F3</i>        | -1.496±0.256 | -1.864±0.624 | 3.44E-04 |
| cg09208010 | 14 | 23305780  | <i>MMP14</i>     | -2.171±0.565 | -1.532±1.038 | 3.45E-04 |
| cg15559737 | 22 | 27016806  | <i>CRYBA4</i>    | 2.121±0.257  | 1.838±0.457  | 3.46E-04 |

|            |    |           |               |              |              |          |
|------------|----|-----------|---------------|--------------|--------------|----------|
| cg03826976 | 11 | 7695433   | CYB5R2        | -2.489±0.443 | -1.81±1.16   | 3.46E-04 |
| cg15665653 | 1  | 27561270  | WDTC1         | -3.596±0.409 | -3.248±0.505 | 3.47E-04 |
| cg13053396 | 12 | 7168545   | C1S           | 0.501±0.174  | 0.808±0.532  | 3.47E-04 |
| cg11388238 | 2  | 201375098 | KCTD18        | -4.041±0.302 | -4.311±0.403 | 3.49E-04 |
| cg21351102 | 18 | 3247294   | MYL12A        | -4.608±0.384 | -4.93±0.464  | 3.50E-04 |
| cg06566994 | 3  | 44596384  | ZKSCAN7       | 0.681±0.296  | 1.259±1.011  | 3.50E-04 |
| cg08146221 | 12 | 6875198   | PTMS          | -3.747±0.24  | -3.473±0.447 | 3.51E-04 |
| cg25425005 | 16 | 202905    | HBZ           | 2.794±0.272  | 2.525±0.421  | 3.51E-04 |
| cg10734665 | 15 | 26107410  | ATP10A        | -0.737±0.254 | -1.116±0.647 | 3.53E-04 |
| cg17091851 | 16 | 69984939  | CLEC18A       | 0.654±0.412  | 0.288±0.545  | 3.53E-04 |
| cg19504888 | 2  | 228191306 | MFF           | 1.825±0.286  | 1.48±0.569   | 3.53E-04 |
| cg19450025 | 16 | 30206073  | SLX1B-SULT1A4 | -2.975±0.51  | -2.279±1.175 | 3.53E-04 |
| cg02798801 | 7  | 99005263  | PDAP1         | -1.249±0.227 | -1.596±0.593 | 3.54E-04 |
| cg26163537 | 7  | 50861592  | GRB10         | -3.092±0.548 | -2.427±1.099 | 3.54E-04 |
| cg07804582 | 16 | 49407186  | C16orf78      | 2.136±0.262  | 1.614±0.915  | 3.55E-04 |
| cg02512226 | 10 | 28288192  | ARMC4         | -1.33±0.235  | -0.918±0.715 | 3.55E-04 |
| cg16772514 | 17 | 43046872  | C1QL1         | -0.236±0.214 | 0.118±0.611  | 3.55E-04 |
| cg03310469 | 2  | 45236672  | SIX2          | -4.137±1.12  | -3.176±1.404 | 3.56E-04 |
| cg17461214 | 1  | 241799063 | CHML          | 1.902±0.215  | 1.674±0.363  | 3.58E-04 |
| cg19462352 | 17 | 27038664  | PROCA1        | -5.174±0.352 | -4.306±1.539 | 3.59E-04 |
| cg26766480 | 9  | 21350197  | 0             | 1.924±0.275  | 1.453±0.817  | 3.59E-04 |
| cg21842274 | 5  | 76248637  | CRHBP         | 0.669±0.304  | 0.231±0.746  | 3.60E-04 |
| cg08766149 | 14 | 25103301  | GZMB          | 2.056±0.288  | 1.624±0.741  | 3.60E-04 |
| cg01333788 | 1  | 35220814  | GJB5          | 1.032±0.447  | 0.611±0.647  | 3.60E-04 |
| cg04835638 | 3  | 60363505  | FHIT          | 2.971±0.273  | 2.751±0.309  | 3.60E-04 |
| cg10037005 | 19 | 49838478  | CD37          | 0.042±0.409  | -0.461±0.835 | 3.61E-04 |
| cg16270990 | 11 | 130542897 | C11orf44      | 1.108±0.206  | 0.71±0.697   | 3.61E-04 |
| cg07618900 | 12 | 70093350  | BEST3         | -0.36±0.24   | -0.716±0.611 | 3.62E-04 |
| cg02762689 | 6  | 42163422  | GUCA1B        | 2.099±0.21   | 1.848±0.415  | 3.63E-04 |
| cg15457079 | 10 | 101841816 | CPN1          | 0.881±0.214  | 0.513±0.64   | 3.64E-04 |
| cg14460735 | 1  | 246728727 | TFB2M         | -0.753±0.265 | -1.111±0.605 | 3.64E-04 |
| cg20784775 | 12 | 29937585  | TMTC1         | -2.451±0.264 | -2.138±0.518 | 3.65E-04 |
| cg04451988 | 10 | 15412706  | FAM171A1      | -5.712±0.79  | -4.771±1.554 | 3.65E-04 |
| cg03552688 | 3  | 138822369 | BPESC1        | 2.205±0.257  | 1.718±0.852  | 3.65E-04 |
| cg12408911 | 16 | 87903671  | SLC7A5        | 0.962±0.143  | 1.194±0.401  | 3.65E-04 |
| cg06112415 | 2  | 27342158  | CGREF1        | -0.133±0.129 | 0.088±0.384  | 3.66E-04 |
| cg25306927 | 2  | 17721751  | VSNL1         | -4.592±0.473 | -3.886±1.209 | 3.68E-04 |
| cg21380842 | 21 | 39288830  | KCNJ6         | -4.996±0.584 | -4.309±1.132 | 3.68E-04 |
| cg11397854 | 3  | 13008878  | IQSEC1        | -3.588±0.555 | -3.061±0.815 | 3.68E-04 |
| cg16454349 | 16 | 4837889   | SMIM22        | 1.681±0.222  | 1.46±0.348   | 3.69E-04 |
| cg13906416 | 19 | 45147440  | PVR           | -3.862±0.554 | -3.341±0.8   | 3.69E-04 |
| cg11015241 | 15 | 26026249  | ATP10A        | 3.33±0.308   | 2.801±0.921  | 3.70E-04 |
| cg19070873 | 14 | 96505448  | C14orf132     | -3.308±0.297 | -2.904±0.682 | 3.70E-04 |
| cg21166999 | 6  | 117746793 | ROS1          | 1.074±0.244  | 0.711±0.621  | 3.71E-04 |
| cg08632701 | 21 | 37451849  | LOC100133286  | 2.784±0.464  | 2.38±0.599   | 3.72E-04 |
| cg03510310 | 11 | 63331286  | HRASLS2       | 2.689±0.146  | 2.45±0.414   | 3.73E-04 |
| cg04551925 | 7  | 30951740  | AQP1          | 0.655±0.311  | 1.182±0.918  | 3.73E-04 |
| cg19876838 | 19 | 48958664  | KCNJ14        | 1.403±0.133  | 1.232±0.287  | 3.74E-04 |
| cg15559700 | 2  | 234579873 | UGT1A9        | 2.009±0.207  | 2.289±0.474  | 3.75E-04 |
| cg08082692 | 10 | 125805493 | CHST15        | 1.778±0.297  | 1.472±0.488  | 3.75E-04 |
| cg16097079 | 6  | 31239916  | HLA-C         | -3.939±0.549 | -3.355±0.94  | 3.75E-04 |
| cg19280968 | 3  | 195270614 | PPP1R2        | -2.223±0.26  | -2.618±0.68  | 3.76E-04 |
| cg09851465 | 1  | 60539671  | C1orf87       | -2.321±0.424 | -1.627±1.203 | 3.76E-04 |
| cg17607024 | 10 | 126630765 | ZRANB1        | 0.744±0.341  | 1.018±0.373  | 3.76E-04 |
| cg08942800 | 6  | 49681310  | CRISP2        | -0.15±0.451  | 0.492±1.097  | 3.76E-04 |
| cg14197923 | 4  | 81187906  | FGF5          | -4.827±0.488 | -4.073±1.299 | 3.78E-04 |
| cg19404832 | 6  | 50681114  | TFAP2D        | -2.838±0.322 | -2.284±0.966 | 3.79E-04 |
| cg06379754 | 7  | 82073573  | CACNA2D1      | -2.954±0.483 | -2.312±1.087 | 3.79E-04 |
| cg17725472 | 1  | 203198757 | CHIT1         | 4.016±0.243  | 3.683±0.567  | 3.80E-04 |
| cg08818784 | 19 | 51522198  | KLK10         | -4.577±0.627 | -3.948±0.994 | 3.81E-04 |
| cg26208930 | 1  | 3607425   | TP73          | 3.681±0.564  | 3.047±1.037  | 3.81E-04 |
| cg27345946 | 3  | 9835511   | ARPC4         | -0.797±0.242 | -1.185±0.673 | 3.81E-04 |
| cg13282594 | 1  | 156211609 | BGLAP         | 1.328±0.219  | 1.08±0.408   | 3.82E-04 |
| cg03520136 | 2  | 158851300 | UPP2          | 2.125±0.294  | 1.839±0.448  | 3.82E-04 |
| cg16504798 | 19 | 8643540   | MYO1F         | -0.834±0.298 | -0.445±0.655 | 3.83E-04 |
| cg24680924 | 7  | 142552940 | EPHB6         | -5.481±0.497 | -4.235±2.221 | 3.83E-04 |
| cg13828839 | 11 | 117747166 | FXND6         | -4.974±0.736 | -4.285±1.062 | 3.83E-04 |

|            |    |           |            |              |              |          |
|------------|----|-----------|------------|--------------|--------------|----------|
| cg19404190 | 5  | 147692173 | SPINK7     | 2.005±0.234  | 1.639±0.632  | 3.84E-04 |
| cg00826384 | 7  | 121513065 | PTPRZ1     | -3.894±0.599 | -3.34±0.85   | 3.84E-04 |
| cg05654164 | 1  | 85725892  | C1orf52    | -0.778±0.443 | -0.23±0.918  | 3.85E-04 |
| cg15320474 | 6  | 29528005  | UBD        | 1.434±0.462  | 0.829±1.024  | 3.87E-04 |
| cg19912436 | 19 | 708918    | PALM       | -3.739±1.379 | -2.693±1.41  | 3.87E-04 |
| cg02676865 | 10 | 99259738  | UBTD1      | -2.537±0.477 | -1.949±0.983 | 3.88E-04 |
| cg16293656 | 8  | 21900438  | FGF17      | -3.094±0.355 | -2.445±1.139 | 3.88E-04 |
| cg25870420 | 3  | 37493949  | ITGA9      | -5.411±0.885 | -4.59±1.26   | 3.88E-04 |
| cg16312163 | 3  | 125899401 | ALDH1L1    | -4.049±0.57  | -3.363±1.142 | 3.89E-04 |
| cg05517711 | 9  | 130662451 | ST6GALNAC6 | -0.947±0.283 | -0.622±0.537 | 3.89E-04 |
| cg00433406 | 1  | 20616975  | VWA5B1     | 1.371±0.374  | 1.853±0.813  | 3.89E-04 |
| cg12400041 | 6  | 56709328  | DST        | 0.895±0.214  | 0.607±0.489  | 3.90E-04 |
| cg08965324 | 12 | 96429827  | LTA4H      | -2.711±0.751 | -2.067±0.944 | 3.90E-04 |
| cg01289103 | 17 | 38821277  | KRT222     | -1.82±0.294  | -1.297±0.916 | 3.93E-04 |
| cg06288632 | 2  | 27358152  | PREB       | 4.282±0.347  | 4.019±0.355  | 3.94E-04 |
| cg19382175 | 5  | 149324712 | PDE6A      | 1.803±0.151  | 1.618±0.31   | 3.95E-04 |
| cg07603484 | 19 | 50434179  | NUP62      | 2.733±0.268  | 2.512±0.318  | 3.95E-04 |
| cg19135706 | 5  | 57878390  | RAB3C      | -3.521±0.371 | -3.053±0.785 | 3.95E-04 |
| cg23032612 | 13 | 38173340  | POSTN      | 0.506±0.306  | 0.108±0.674  | 3.97E-04 |
| cg17974185 | 20 | 36323340  | CTNBL1     | 1.144±0.544  | 1.792±1.08   | 3.97E-04 |
| cg03549571 | 12 | 49488198  | DHH        | -5.039±0.661 | -4.312±1.187 | 3.97E-04 |
| cg21094669 | 4  | 175750109 | GLRA3      | -2.619±0.284 | -2.232±0.66  | 3.98E-04 |
| cg20937139 | 4  | 157892758 | PDGFC      | -2.222±0.961 | -1.495±0.982 | 3.98E-04 |
| cg26145103 | 11 | 120196505 | TMEM136    | -3.136±0.404 | -2.775±0.548 | 3.98E-04 |
| cg17685628 | 14 | 37051693  | NKX2-8     | -2.491±0.683 | -1.852±0.988 | 4.00E-04 |
| cg13297865 | 6  | 80657415  | ELOVL4     | -3.831±0.646 | -2.703±1.979 | 4.01E-04 |
| cg02157083 | 11 | 116662800 | APOA5      | 1.746±0.224  | 1.479±0.446  | 4.01E-04 |
| cg02417264 | 7  | 45197727  | RAMP3      | -0.839±0.306 | -0.487±0.581 | 4.01E-04 |
| cg14338887 | 6  | 42928500  | GNMT       | -3.096±0.831 | -2.424±0.96  | 4.03E-04 |
| cg14080001 | 15 | 75940555  | SNX33      | -4.338±0.323 | -4.05±0.436  | 4.04E-04 |
| cg01813965 | 16 | 57729104  | CCDC135    | 0.975±0.31   | 0.594±0.639  | 4.06E-04 |
| cg18312782 | 17 | 62341028  | TEX2       | -2.876±0.466 | -3.221±0.456 | 4.07E-04 |
| cg11387131 | 11 | 128761211 | KCNJ5      | -3.977±0.587 | -3.451±0.8   | 4.08E-04 |
| cg17347389 | 14 | 51562646  | TRIM9      | -4.478±0.447 | -3.862±1.053 | 4.08E-04 |
| cg12286890 | 1  | 168513067 | XCL2       | 1.835±0.489  | 1.332±0.806  | 4.09E-04 |
| cg24949049 | 13 | 61013241  | TDRD3      | 2.528±0.212  | 2.068±0.82   | 4.11E-04 |
| cg14401592 | 4  | 156787800 | ASIC5      | 1.352±0.273  | 0.989±0.618  | 4.12E-04 |
| cg25759381 | 22 | 19118539  | TSSK2      | 2.216±0.244  | 2.448±0.364  | 4.13E-04 |
| cg07981495 | 6  | 87804765  | CGA        | 2.147±0.257  | 1.846±0.501  | 4.15E-04 |
| cg01888601 | 11 | 47736182  | AGBL2      | -0.568±0.289 | -1±0.748     | 4.15E-04 |
| cg27235662 | 3  | 190105986 | CLDN16     | 1.492±0.314  | 1.11±0.642   | 4.15E-04 |
| cg20624391 | 6  | 105584149 | BVES       | -1.912±0.246 | -1.466±0.787 | 4.16E-04 |
| cg17929627 | 10 | 129924035 | MKI67      | -4.233±0.22  | -4.418±0.273 | 4.17E-04 |
| cg11747771 | 9  | 6645468   | GLDC       | -4.557±0.585 | -3.649±1.58  | 4.17E-04 |
| cg14396117 | 13 | 109248047 | MYO16      | -0.849±0.252 | -0.434±0.727 | 4.17E-04 |
| cg26718420 | 12 | 10331666  | TMEM52B    | 1.849±0.265  | 1.451±0.689  | 4.18E-04 |
| cg16131766 | 15 | 23810280  | MKRN3      | 1.387±0.328  | 0.958±0.729  | 4.20E-04 |
| cg26981881 | 9  | 117903424 | 42705      | 1.8±0.254    | 1.45±0.601   | 4.21E-04 |
| cg20777437 | 1  | 54619703  | CDCP2      | -0.388±0.253 | -0.783±0.689 | 4.21E-04 |
| cg11964474 | 17 | 41278655  | NBR2       | 2.366±0.281  | 1.899±0.82   | 4.21E-04 |
| cg01283289 | 12 | 81472177  | ACSS3      | -3.372±0.398 | -2.747±1.091 | 4.21E-04 |
| cg22957381 | 1  | 112532078 | KCND3      | -4.083±0.544 | -3.36±1.233  | 4.22E-04 |
| cg03050748 | 5  | 42423555  | GHR        | -4.218±0.446 | -3.621±1.02  | 4.22E-04 |
| cg03862760 | 7  | 1609483   | PSMG3      | -0.381±0.142 | -0.586±0.355 | 4.23E-04 |
| cg24219058 | 4  | 30721353  | PCDH7      | -4.399±0.589 | -3.684±1.201 | 4.24E-04 |
| cg03805684 | 11 | 61561219  | FEN1       | -0.878±0.213 | -1.171±0.504 | 4.25E-04 |
| cg11166999 | 15 | 25226929  | SNORD107   | 2.177±0.35   | 1.84±0.531   | 4.26E-04 |
| cg12940073 | 16 | 48180664  | ABCC12     | 1.534±0.327  | 1.2±0.538    | 4.26E-04 |
| cg18589858 | 11 | 74860985  | SLCO2B1    | 1.66±0.244   | 1.384±0.458  | 4.27E-04 |
| cg24459209 | 11 | 57148215  | PRG3       | 1.285±0.34   | 0.765±0.906  | 4.27E-04 |
| cg26062856 | 15 | 26109425  | ATP10A     | 1.215±0.242  | 0.87±0.596   | 4.27E-04 |
| cg10334385 | 2  | 11272868  | C2orf50    | -2.953±0.194 | -3.213±0.445 | 4.27E-04 |
| cg02240622 | 15 | 40601467  | PLCB2      | 0.73±0.259   | 0.292±0.77   | 4.27E-04 |
| cg04663487 | 7  | 115670804 | TVEC       | -2.672±0.317 | -2.983±0.494 | 4.31E-04 |
| cg02273392 | 7  | 100770414 | SERPINE1   | -5.026±0.458 | -4.318±1.235 | 4.31E-04 |
| cg00405677 | 5  | 153858102 | HAND1      | -3.396±0.365 | -2.714±1.21  | 4.33E-04 |
| cg00647741 | 19 | 58693450  | ZNF274     | -0.819±0.271 | -1.12±0.498  | 4.33E-04 |

|            |    |           |              |              |              |          |
|------------|----|-----------|--------------|--------------|--------------|----------|
| cg17784922 | 7  | 142659425 | KEL          | 1.631±0.269  | 1.231±0.694  | 4.34E-04 |
| cg11195662 | 9  | 79520720  | PRUNE2       | -3.512±0.318 | -3.15±0.602  | 4.34E-04 |
| cg16557944 | 1  | 53068197  | GPX7         | -5.998±0.764 | -4.63±2.421  | 4.35E-04 |
| cg22415472 | 2  | 108602361 | SLC5A7       | 1.649±0.221  | 1.18±0.84    | 4.38E-04 |
| cg16893574 | 16 | 71392095  | CALB2        | -0.291±0.223 | -0.618±0.567 | 4.39E-04 |
| cg24290574 | 3  | 148583152 | CPA3         | -0.52±0.307  | -1.07±0.973  | 4.39E-04 |
| cg24231716 | 5  | 76934501  | OTP          | -2.626±0.256 | -2.304±0.547 | 4.39E-04 |
| cg24053375 | 10 | 48392130  | RBP3         | 3.31±0.202   | 2.946±0.644  | 4.39E-04 |
| cg11952714 | 1  | 99126623  | SNX7         | -2.969±0.356 | -2.611±0.575 | 4.40E-04 |
| cg14870271 | 17 | 76976010  | LGALS3BP     | -1.455±0.214 | -1.835±0.673 | 4.41E-04 |
| cg02089348 | 4  | 1724449   | TACC3        | -0.4±0.165   | -0.73±0.589  | 4.41E-04 |
| cg19439331 | 10 | 70320470  | TET1         | -4.922±0.437 | -4.458±0.758 | 4.41E-04 |
| cg00011459 | 16 | 8890425   | TMEM186      | 2.713±0.377  | 2.979±0.339  | 4.41E-04 |
| cg19363546 | 11 | 120110701 | POU2F3       | -3.869±0.5   | -3.354±0.834 | 4.41E-04 |
| cg11879577 | 16 | 18813519  | ARL6IP1      | -2.175±0.293 | -2.614±0.766 | 4.42E-04 |
| cg25234611 | 1  | 1371347   | VWA1         | -3.067±0.727 | -2.433±0.96  | 4.43E-04 |
| cg20423977 | 21 | 42557641  | PLAC4        | 2.769±0.3    | 2.26±0.898   | 4.43E-04 |
| cg03390211 | 16 | 325826    | RGS11        | -5.226±1.048 | -4.281±1.454 | 4.44E-04 |
| cg01236137 | 5  | 32585526  | SUB1         | -3.491±0.577 | -3.951±0.656 | 4.47E-04 |
| cg00101227 | 1  | 161280266 | MPZ          | 1.475±0.215  | 1.73±0.429   | 4.48E-04 |
| cg02905245 | 3  | 112359652 | CCDC80       | -1.2±0.389   | -0.721±0.81  | 4.50E-04 |
| cg02883161 | 12 | 120807618 | MSI1         | -3.057±0.404 | -2.578±0.807 | 4.52E-04 |
| cg01528948 | 4  | 100242624 | ADH1B        | -1.832±0.353 | -1.474±0.578 | 4.52E-04 |
| cg14736911 | 4  | 120057818 | MYOZ2        | 0.16±0.348   | 0.557±0.664  | 4.53E-04 |
| cg17915429 | 19 | 15590069  | PGLYRP2      | 1.342±0.19   | 1.087±0.439  | 4.53E-04 |
| cg20225915 | 11 | 805726    | PIDD         | -1.593±0.172 | -1.41±0.301  | 4.53E-04 |
| cg24443367 | 10 | 61496187  | 0            | 1.601±0.252  | 1.253±0.601  | 4.54E-04 |
| cg18641937 | 1  | 160924389 | ITLN2        | 2.29±0.302   | 1.872±0.722  | 4.54E-04 |
| cg22401066 | 6  | 123110741 | SMPDL3A      | -4.516±0.422 | -4.22±0.375  | 4.55E-04 |
| cg21407055 | 11 | 3666483   | ART1         | 1.883±0.269  | 1.476±0.711  | 4.55E-04 |
| cg10574499 | 16 | 67918754  | NRN1L        | 0.072±0.302  | 0.602±0.941  | 4.56E-04 |
| cg05417950 | 4  | 123843025 | NUDT6        | -2.418±0.437 | -1.951±0.767 | 4.57E-04 |
| cg13401339 | 2  | 24272928  | FKBP1B       | -4.323±0.367 | -3.801±0.906 | 4.57E-04 |
| cg01124420 | 2  | 109605518 | EDAR         | -1.231±0.217 | -1.599±0.65  | 4.57E-04 |
| cg26187237 | 2  | 217498574 | IGFBP2       | -3.939±0.95  | -3.124±1.227 | 4.58E-04 |
| cg06572974 | 15 | 93442219  | CHD2         | 2.612±0.246  | 2.066±0.984  | 4.59E-04 |
| cg11063110 | 7  | 129985205 | CPA5         | 0.767±0.411  | 1.262±0.836  | 4.59E-04 |
| cg05656364 | 2  | 85804732  | VAMP8        | -2.524±0.544 | -3.09±0.923  | 4.60E-04 |
| cg06601473 | 11 | 33694151  | KIAA1549L    | 2.721±0.341  | 2.303±0.709  | 4.60E-04 |
| cg25427638 | 19 | 41389357  | CYP2A7       | 1.869±0.254  | 1.554±0.537  | 4.60E-04 |
| cg21770617 | 3  | 58652897  | FAM3D        | 2.159±0.209  | 1.866±0.508  | 4.60E-04 |
| cg03427831 | 1  | 11867453  | MTHFR        | -1.579±0.33  | -1.9±0.512   | 4.60E-04 |
| cg08551633 | 19 | 43099046  | CEACAM8      | 0.019±0.125  | -0.201±0.391 | 4.60E-04 |
| cg23452458 | 17 | 45899388  | OSBPL7       | -3.84±0.411  | -3.418±0.686 | 4.62E-04 |
| cg23871933 | 16 | 85722399  | GINS2        | -4.308±0.236 | -4.492±0.26  | 4.63E-04 |
| cg02144933 | 2  | 201450690 | AOX1         | -4.401±0.511 | -3.806±0.998 | 4.64E-04 |
| cg11554507 | 7  | 31380572  | NEUROD6      | 2.276±0.24   | 1.802±0.849  | 4.64E-04 |
| cg21948655 | 1  | 152849738 | SMCP         | 3.143±0.334  | 2.457±1.231  | 4.65E-04 |
| cg27460755 | 2  | 154800287 | GALNT13      | 1.528±0.252  | 1.329±0.283  | 4.65E-04 |
| cg17826679 | 19 | 10736038  | SLC44A2      | -0.152±0.401 | 0.251±0.652  | 4.65E-04 |
| cg06367117 | 17 | 26903928  | ALDOC        | -4.703±0.562 | -3.817±1.559 | 4.66E-04 |
| cg07640473 | 3  | 50193232  | SEMA3F       | -3.514±0.483 | -2.868±1.112 | 4.66E-04 |
| cg10313633 | 11 | 44972890  | TP53I11      | 2.217±0.275  | 1.748±0.83   | 4.66E-04 |
| cg07899016 | 5  | 140588299 | PCDHB12      | -0.569±0.207 | -0.266±0.529 | 4.66E-04 |
| cg14885742 | 11 | 320956    | IFITM3       | -1.407±0.481 | -0.91±0.799  | 4.67E-04 |
| cg19297232 | 16 | 68483021  | SMPD3        | -0.085±0.317 | 0.384±0.82   | 4.68E-04 |
| cg11434468 | 8  | 11059277  | XKR6         | -5.399±0.499 | -4.709±1.195 | 4.68E-04 |
| cg25738273 | 8  | 33457336  | DUSP26       | -4.206±0.496 | -3.634±0.958 | 4.68E-04 |
| cg17453778 | 3  | 121902561 | CASR         | -1.956±0.29  | -1.486±0.829 | 4.69E-04 |
| cg25085950 | 21 | 27108830  | ATP5J        | -3.077±0.423 | -2.703±0.573 | 4.70E-04 |
| cg07617246 | 15 | 65715951  | IGDCC4       | 0.435±0.158  | 0.69±0.45    | 4.72E-04 |
| cg16276199 | 2  | 28974102  | PPP1CB       | -5.148±0.385 | -5.471±0.482 | 4.72E-04 |
| cg02883230 | 15 | 72564263  | PARP6        | -1.431±0.25  | -1.75±0.547  | 4.73E-04 |
| cg18627308 | 11 | 71497489  | FAM86C1      | -3.348±0.43  | -2.848±0.841 | 4.73E-04 |
| cg01293143 | 20 | 62688326  | TCEA2        | -0.239±0.178 | 0.043±0.497  | 4.74E-04 |
| cg14737613 | 19 | 5978790   | LOC100128568 | -3.905±0.415 | -4.197±0.372 | 4.74E-04 |
| cg06509239 | 2  | 19558569  | OSR1         | -3.862±0.298 | -3.191±1.212 | 4.75E-04 |

|            |    |           |           |              |              |          |
|------------|----|-----------|-----------|--------------|--------------|----------|
| cg22764341 | 4  | 47487088  | ATP10D    | -3.453±0.358 | -3.084±0.602 | 4.75E-04 |
| cg00133909 | 15 | 73977201  | CD276     | -3.82±0.428  | -3.457±0.545 | 4.75E-04 |
| cg05585544 | 11 | 47624801  | 0         | 1.802±0.315  | 1.436±0.616  | 4.76E-04 |
| cg03775123 | 15 | 65214075  | ANKDD1A   | 0.034±0.174  | -0.386±0.759 | 4.77E-04 |
| cg00674922 | 3  | 18465772  | SATB1     | -5.392±0.579 | -4.592±1.389 | 4.77E-04 |
| cg06832950 | 14 | 51025891  | ATL1      | 3.002±0.186  | 2.743±0.45   | 4.77E-04 |
| cg16796951 | 20 | 34555073  | CNBD2     | 2.051±0.176  | 1.567±0.881  | 4.78E-04 |
| cg20692181 | 19 | 7733174   | RETN      | 1.023±0.308  | 0.722±0.483  | 4.78E-04 |
| cg04726446 | 2  | 26624865  | DRC1      | -3.533±0.488 | -2.998±0.889 | 4.78E-04 |
| cg10180697 | 5  | 79948941  | DHFR      | 1.642±0.396  | 1.261±0.602  | 4.79E-04 |
| cg12452946 | 4  | 128886867 | MFSD8     | -2.608±0.256 | -2.375±0.363 | 4.79E-04 |
| cg05089968 | 6  | 166722773 | PRR18     | 0.967±0.261  | 0.577±0.683  | 4.80E-04 |
| cg16155382 | 1  | 24646191  | GRHL3     | -3.273±0.317 | -3.599±0.532 | 4.82E-04 |
| cg02310296 | 20 | 44637358  | MMP9      | -1.714±0.257 | -2.097±0.673 | 4.82E-04 |
| cg25461934 | 20 | 33759150  | PROCR     | 2.541±0.392  | 2.845±0.432  | 4.83E-04 |
| cg09911342 | 7  | 117067919 | ASZ1      | 2.543±0.368  | 1.981±0.989  | 4.84E-04 |
| cg09736162 | 3  | 48700443  | CELSR3    | -3.95±0.716  | -2.974±1.692 | 4.86E-04 |
| cg25162301 | 3  | 186330055 | AHSG      | 2.487±0.201  | 2.191±0.518  | 4.88E-04 |
| cg25781123 | 3  | 9404598   | THUMPD3   | -3.945±0.372 | -4.234±0.411 | 4.88E-04 |
| cg10995380 | 16 | 31484032  | TGFB11    | -1.956±0.383 | -1.61±0.539  | 4.89E-04 |
| cg21400896 | 17 | 47288569  | NGT2      | 0.007±0.234  | 0.382±0.664  | 4.89E-04 |
| cg19451466 | 1  | 162467441 | UHMK1     | -4.381±0.313 | -4.683±0.482 | 4.90E-04 |
| cg27585441 | 3  | 107096886 | CCDC54    | 1.14±0.383   | 0.788±0.537  | 4.91E-04 |
| cg06312477 | 1  | 228003900 | PRSS38    | 2.4±0.164    | 2.202±0.338  | 4.91E-04 |
| cg19180828 | 1  | 6265220   | RNF207    | -2.505±0.378 | -2.021±0.832 | 4.92E-04 |
| cg08130265 | 15 | 77519170  | LINC00597 | -0.309±0.283 | 0.159±0.832  | 4.93E-04 |
| cg20199333 | 11 | 46740790  | F2        | 2.625±0.228  | 2.196±0.771  | 4.94E-04 |
| cg20576510 | 4  | 16077324  | PROM1     | 3.759±0.267  | 3.386±0.651  | 4.94E-04 |
| cg01782486 | 1  | 154986512 | ZBTB7B    | 2.174±0.221  | 1.947±0.371  | 4.95E-04 |
| cg25584626 | 5  | 119800234 | PRR16     | -4.104±0.462 | -3.235±1.559 | 4.96E-04 |
| cg25077328 | 22 | 43546988  | TSPO      | 3.129±0.17   | 2.886±0.427  | 4.96E-04 |
| cg25040783 | 3  | 57261306  | APPL1     | -3.583±0.437 | -3.234±0.507 | 4.98E-04 |
| cg03213216 | 19 | 46001735  | PPM1N     | -4.236±0.379 | -3.593±1.146 | 5.01E-04 |
| cg08815652 | 15 | 71055727  | UACA      | -3.34±0.449  | -2.766±0.989 | 5.01E-04 |
| cg16256504 | 2  | 219724157 | WNT6      | -3.641±0.412 | -3.175±0.783 | 5.01E-04 |
| cg03278643 | 4  | 5710767   | EVC2      | -0.156±0.214 | 0.246±0.723  | 5.02E-04 |
| cg13468685 | 2  | 68592737  | PLEK      | 1.047±0.386  | 0.499±0.958  | 5.04E-04 |
| cg16215361 | 11 | 26594620  | MUC15     | 1.43±0.264   | 0.869±1.017  | 5.08E-04 |
| cg24059075 | 12 | 49688316  | PRPH      | -1.348±0.211 | -1.721±0.668 | 5.08E-04 |
| cg15423862 | 3  | 155838109 | KCNAB1    | 2.907±0.208  | 2.678±0.383  | 5.08E-04 |
| cg18626709 | 3  | 189838693 | LEPREL1   | -4.409±0.648 | -3.869±0.809 | 5.08E-04 |
| cg04597449 | 5  | 94955575  | GPR150    | -1.918±0.277 | -1.385±0.962 | 5.10E-04 |
| cg07426960 | 11 | 69469290  | 0         | -0.201±0.231 | -0.61±0.732  | 5.10E-04 |
| cg25211252 | 3  | 178984797 | KCNMB3    | 1.049±0.214  | 1.373±0.573  | 5.11E-04 |
| cg14045283 | 19 | 495737    | MADCAM1   | -3.95±0.349  | -4.316±0.605 | 5.11E-04 |
| cg11078738 | 2  | 69240453  | ANTXR1    | -4.373±0.332 | -3.953±0.723 | 5.11E-04 |
| cg05454446 | 10 | 43277757  | BMS1      | -1.254±0.262 | -1.616±0.631 | 5.11E-04 |
| cg23698969 | 11 | 2931165   | SLC22A18  | 3.586±0.242  | 3.781±0.286  | 5.11E-04 |
| cg02672220 | 21 | 38070588  | SIM2      | -2.537±0.248 | -1.972±1.027 | 5.11E-04 |
| cg21391660 | 17 | 73522123  | LLGL2     | -4.918±0.33  | -5.192±0.409 | 5.12E-04 |
| cg23208152 | 3  | 50383134  | ZMYND10   | -1.773±0.795 | -2.771±1.718 | 5.15E-04 |
| cg10338338 | 12 | 8088931   | SLC2A3    | -3.432±0.471 | -2.814±1.072 | 5.16E-04 |
| cg09986574 | 9  | 135544256 | GTF3C4    | 1.025±0.245  | 1.194±0.214  | 5.17E-04 |
| cg04711324 | 18 | 40695633  | RIT2      | 1.95±0.357   | 1.396±0.981  | 5.17E-04 |
| cg16340268 | 1  | 226925172 | ITPKB     | -3.863±0.211 | -3.136±1.339 | 5.18E-04 |
| cg08739282 | 4  | 24586511  | DHX15     | -2.831±0.376 | -3.22±0.642  | 5.20E-04 |
| cg08465774 | 8  | 39771756  | IDO1      | 0.921±0.359  | 0.568±0.572  | 5.21E-04 |
| cg18474934 | 4  | 122853965 | TRPC3     | 1.067±0.393  | 1.435±0.588  | 5.22E-04 |
| cg10917602 | 16 | 30996630  | HSD3B7    | -0.181±0.264 | -0.535±0.615 | 5.22E-04 |
| cg18411891 | 11 | 86666000  | FZD4      | -5.423±0.512 | -4.998±0.636 | 5.22E-04 |
| cg03944089 | 6  | 134497379 | SGK1      | -3.135±0.517 | -2.719±0.613 | 5.22E-04 |
| cg15619794 | 5  | 131880649 | IL5       | 2.081±0.18   | 1.848±0.404  | 5.23E-04 |
| cg08349573 | 17 | 77020243  | C1QTNF1   | -5.842±0.516 | -5.037±1.429 | 5.23E-04 |
| cg26033710 | 2  | 75426249  | TACR1     | -0.812±0.298 | -0.402±0.717 | 5.23E-04 |
| cg09037858 | 8  | 22103057  | POLR3D    | -3.872±0.361 | -3.602±0.373 | 5.23E-04 |
| cg00333528 | 6  | 89927485  | GABRR1    | -1.147±0.263 | -0.675±0.848 | 5.23E-04 |
| cg21547708 | 17 | 71161160  | SSTR2     | -4.153±0.392 | -3.506±1.156 | 5.25E-04 |

|            |    |           |           |              |              |          |
|------------|----|-----------|-----------|--------------|--------------|----------|
| cg18669381 | 1  | 16539088  | ARHGEF19  | -0.473±0.181 | -0.805±0.596 | 5.25E-04 |
| cg02322989 | 2  | 142888598 | LRP1B     | -3.963±0.399 | -3.326±1.134 | 5.25E-04 |
| cg00622552 | 15 | 76016335  | ODF3L1    | -2.485±0.351 | -2.129±0.585 | 5.26E-04 |
| cg12370791 | 17 | 46703650  | HOXB9     | -4.183±0.281 | -3.142±1.923 | 5.26E-04 |
| cg02519806 | 4  | 119810036 | SYNPO2    | -4.484±0.436 | -3.732±1.349 | 5.26E-04 |
| cg12727795 | 5  | 149535695 | PDGFRB    | -4.046±0.324 | -3.365±1.237 | 5.26E-04 |
| cg00412772 | 19 | 38794845  | C19orf33  | 0.776±0.274  | 0.356±0.745  | 5.28E-04 |
| cg13888886 | 20 | 55904640  | SPO11     | 2.635±0.206  | 2.352±0.496  | 5.29E-04 |
| cg04801003 | 2  | 69240754  | ANTXR1    | -4.323±0.386 | -3.925±0.657 | 5.30E-04 |
| cg21161070 | 12 | 50419399  | RACGAP1   | -1.772±0.261 | -2.007±0.368 | 5.31E-04 |
| cg20972495 | 3  | 42624879  | SEC22C    | 2.435±0.116  | 2.32±0.188   | 5.32E-04 |
| cg22861316 | 5  | 159656660 | FABP6     | 2.302±0.274  | 1.966±0.577  | 5.32E-04 |
| cg20066677 | 12 | 133424420 | CHFR      | 2.486±0.273  | 2.805±0.544  | 5.34E-04 |
| cg00557354 | 13 | 111767899 | ARHGEF7   | -3.561±0.546 | -2.834±1.268 | 5.34E-04 |
| cg11418559 | 1  | 26487928  | FAM110D   | -0.876±0.352 | -0.487±0.654 | 5.35E-04 |
| cg02275359 | 19 | 36719719  | ZNF146    | 2.352±0.212  | 2.538±0.289  | 5.36E-04 |
| cg23609672 | 1  | 203144862 | MYBPH     | 1.689±0.365  | 1.178±0.9    | 5.37E-04 |
| cg22417789 | 13 | 80915465  | SPRY2     | -3.959±0.664 | -3.406±0.835 | 5.38E-04 |
| cg25177452 | 5  | 72416677  | TMEM171   | -3.9±0.621   | -3.354±0.849 | 5.38E-04 |
| cg09947274 | 2  | 27439915  | CAD       | -0.142±0.237 | -0.51±0.657  | 5.40E-04 |
| cg22262140 | 22 | 21986976  | CCDC116   | -0.235±0.208 | -0.634±0.722 | 5.40E-04 |
| cg21022395 | 10 | 112722440 | SHOC2     | 1.952±0.309  | 1.603±0.592  | 5.41E-04 |
| cg05254747 | 8  | 22223937  | SLC39A14  | 1.453±0.303  | 1.857±0.706  | 5.42E-04 |
| cg07642638 | 20 | 5891786   | CHGB      | -3.019±0.255 | -2.47±1.002  | 5.43E-04 |
| cg15958424 | 3  | 132036067 | ACPP      | -1.561±0.253 | -1.976±0.744 | 5.43E-04 |
| cg23323879 | 15 | 65504534  | CILP      | 2.238±0.219  | 1.852±0.695  | 5.44E-04 |
| cg27377450 | 19 | 7446301   | 0         | 2.711±0.377  | 2.384±0.507  | 5.44E-04 |
| cg19149125 | 8  | 37619350  | PROSC     | 2.644±0.213  | 2.342±0.532  | 5.44E-04 |
| cg06973652 | 17 | 41278622  | NBR2      | 2.51±0.431   | 1.813±1.247  | 5.51E-04 |
| cg22917487 | 3  | 39322103  | CX3CR1    | 3.013±0.315  | 2.747±0.405  | 5.52E-04 |
| cg01029592 | 17 | 7493453   | SOX15     | 1.142±0.189  | 0.784±0.649  | 5.52E-04 |
| cg07066326 | 11 | 910094    | CHID1     | -0.749±0.227 | -1.086±0.599 | 5.52E-04 |
| cg16729794 | 3  | 39509195  | MOBP      | 1.177±0.236  | 0.914±0.443  | 5.52E-04 |
| cg18821742 | 4  | 30722274  | PCDH7     | -4.095±0.652 | -3.459±1.037 | 5.57E-04 |
| cg01237132 | 20 | 23807958  | CST2      | 0.931±0.641  | 0.336±0.95   | 5.58E-04 |
| cg16925486 | 9  | 19380496  | RPS6      | -4.653±0.422 | -5.015±0.558 | 5.60E-04 |
| cg27390220 | 3  | 45268523  | TMEM158   | -0.401±0.315 | -0.06±0.575  | 5.61E-04 |
| cg15087147 | 7  | 127672169 | LRRC4     | -5.253±0.285 | -4.28±1.804  | 5.61E-04 |
| cg11679069 | 13 | 43596577  | DNAJC15   | 1.59±0.29    | 1.24±0.604   | 5.61E-04 |
| cg02887841 | 22 | 19744670  | TBX1      | -4.316±0.385 | -3.677±1.147 | 5.61E-04 |
| cg20789620 | 19 | 4304334   | FSD1      | 0.738±0.169  | 0.372±0.669  | 5.61E-04 |
| cg19063972 | 13 | 95364908  | SOX21     | -4.161±0.74  | -3.382±1.301 | 5.61E-04 |
| cg04151683 | 9  | 28718459  | LINGO2    | -0.729±0.325 | -1.177±0.79  | 5.63E-04 |
| cg13343486 | 19 | 51520533  | KLK10     | -4.963±0.684 | -4.183±1.328 | 5.63E-04 |
| cg18424091 | 6  | 31781814  | HSPA1L    | -2.541±0.339 | -2.905±0.609 | 5.63E-04 |
| cg21144270 | 2  | 242448675 | STK25     | -2.568±0.439 | -2.03±0.931  | 5.66E-04 |
| cg05216141 | 6  | 36354960  | ETV7      | -3.817±0.543 | -3.294±0.85  | 5.68E-04 |
| cg01130192 | 9  | 32385002  | ACO1      | -3.546±0.492 | -3.128±0.641 | 5.68E-04 |
| cg26384034 | 6  | 84744055  | MRAP2     | -4.188±0.302 | -3.704±0.866 | 5.69E-04 |
| cg13878456 | 17 | 38020344  | IKZF3     | -1.691±0.222 | -1.907±0.353 | 5.71E-04 |
| cg23265096 | 20 | 57582594  | CTSZ      | -0.78±0.2    | -1.104±0.582 | 5.71E-04 |
| cg10664272 | 2  | 85638053  | CAPG      | 3.059±0.341  | 2.602±0.802  | 5.73E-04 |
| cg02788102 | 11 | 115374969 | CADM1     | -3.397±0.492 | -2.84±0.948  | 5.74E-04 |
| cg04582938 | 9  | 139971429 | UAP1L1    | -1.428±0.244 | -1.008±0.758 | 5.75E-04 |
| cg10503138 | 3  | 2142391   | CNTN4     | 1.272±0.312  | 0.845±0.752  | 5.76E-04 |
| cg02431964 | 2  | 119700029 | MARCO     | 2.474±0.235  | 2.029±0.809  | 5.76E-04 |
| cg11656547 | 9  | 72658747  | MAMDC2    | -2.623±0.43  | -2.111±0.881 | 5.76E-04 |
| cg08659707 | 2  | 20527677  | PUM2      | 1.413±0.265  | 1.026±0.689  | 5.79E-04 |
| cg13974531 | 16 | 31228444  | PYDC1     | -1.694±0.214 | -1.355±0.608 | 5.79E-04 |
| cg21942546 | 7  | 73154357  | ABHD11    | 3.948±0.512  | 3.381±0.963  | 5.82E-04 |
| cg15737168 | 11 | 120974095 | TECTA     | 2.644±0.224  | 2.345±0.526  | 5.82E-04 |
| cg23487586 | 16 | 85315923  | LINC00311 | 3.085±0.255  | 2.749±0.589  | 5.85E-04 |
| cg18712919 | 2  | 28112170  | RBKS      | 1.356±0.279  | 1.001±0.613  | 5.85E-04 |
| cg21153758 | 5  | 52083992  | ITGA1     | -5.168±0.621 | -4.66±0.767  | 5.85E-04 |
| cg08315277 | 22 | 46659398  | PKDREJ    | 3.879±0.349  | 3.596±0.426  | 5.85E-04 |
| cg21307628 | 3  | 112360952 | CCDC80    | 1.65±0.235   | 1.162±0.894  | 5.86E-04 |
| cg10693071 | 5  | 114516422 | TRIM36    | -1.913±0.291 | -1.355±1.018 | 5.86E-04 |

|            |    |           |              |              |              |          |
|------------|----|-----------|--------------|--------------|--------------|----------|
| cg02765328 | 12 | 4383281   | CCND2        | -5.212±0.444 | -4.255±1.756 | 5.87E-04 |
| cg26756083 | 8  | 89339622  | MMP16        | -4.061±0.345 | -3.329±1.341 | 5.87E-04 |
| cg16413777 | 17 | 48555933  | RSAD1        | -4.424±0.429 | -4.765±0.506 | 5.87E-04 |
| cg22563815 | 15 | 78856949  | CHRNA5       | 0.082±0.247  | 0.491±0.738  | 5.88E-04 |
| cg24926276 | 19 | 4539943   | LRG1         | -0.368±0.279 | -0.829±0.831 | 5.89E-04 |
| cg14743462 | 1  | 228646946 | HIST3H2A     | -4.624±0.407 | -3.51±2.065  | 5.90E-04 |
| cg18966791 | 1  | 156399305 | C1orf61      | -4.28±0.466  | -3.564±1.282 | 5.90E-04 |
| cg17301902 | 9  | 80263219  | GNA14        | -3.118±0.478 | -2.623±0.825 | 5.91E-04 |
| cg12205591 | 21 | 44588552  | CRYAA        | 0.545±0.248  | 0.212±0.587  | 5.93E-04 |
| cg18145683 | 19 | 17959281  | JAK3         | 1.404±0.188  | 1.208±0.328  | 5.93E-04 |
| cg20900524 | 1  | 40563271  | PPT1         | -4.018±0.501 | -4.374±0.479 | 5.94E-04 |
| cg09096950 | 11 | 118230095 | UBE4A        | -1.473±0.349 | -1.925±0.793 | 5.95E-04 |
| cg09837169 | 6  | 155410740 | TIAM2        | 2.92±0.319   | 2.616±0.494  | 5.95E-04 |
| cg18679190 | 1  | 17308781  | MFAP2        | 3.557±0.227  | 3.169±0.702  | 5.95E-04 |
| cg01500097 | 6  | 110011156 | AK9          | -0.905±0.283 | -0.598±0.519 | 5.98E-04 |
| cg11826486 | 4  | 91761695  | CCSER1       | 1.41±0.313   | 1.159±0.376  | 5.99E-04 |
| cg14375111 | 3  | 14165186  | CHCHD4       | 1.772±0.474  | 1.303±0.773  | 6.01E-04 |
| cg17321617 | 11 | 64764490  | BATF2        | -2.461±0.309 | -2.143±0.532 | 6.05E-04 |
| cg12623088 | 15 | 66585521  | DIS3L        | -4.067±0.466 | -4.431±0.533 | 6.07E-04 |
| cg14049461 | 4  | 93224987  | GRID2        | -4.555±0.332 | -3.949±1.105 | 6.08E-04 |
| cg16509045 | 9  | 77502963  | TRPM6        | 0.214±0.296  | -0.259±0.854 | 6.09E-04 |
| cg14473145 | 14 | 38725656  | CLEC14A      | -0.548±0.216 | -0.13±0.765  | 6.11E-04 |
| cg05778847 | 19 | 38746538  | PPP1R14A     | -3.261±0.374 | -2.674±1.057 | 6.12E-04 |
| cg09259772 | 7  | 12726089  | ARL4A        | -0.865±0.214 | -1.229±0.661 | 6.13E-04 |
| cg11195002 | 19 | 10399805  | ICAM5        | -3.129±0.275 | -3.555±0.765 | 6.16E-04 |
| cg21416237 | 17 | 39970091  | FKBP10       | 1.953±0.286  | 2.314±0.633  | 6.20E-04 |
| cg17571291 | 7  | 43797787  | BLVRA        | -1.238±0.273 | -1.694±0.827 | 6.21E-04 |
| cg04719491 | 8  | 122654045 | HAS2         | -4.558±0.464 | -3.979±1.014 | 6.22E-04 |
| cg15045441 | 6  | 72130432  | LINC00472    | -3.87±0.678  | -3.123±1.273 | 6.24E-04 |
| cg26704579 | 15 | 75018690  | CYP1A1       | -2.351±0.276 | -2.127±0.34  | 6.24E-04 |
| cg13269964 | 17 | 41924577  | CD300LG      | 1.427±0.35   | 1.832±0.7    | 6.24E-04 |
| cg12182525 | 4  | 177190321 | ASB5         | 2.506±0.258  | 2.131±0.671  | 6.25E-04 |
| cg27160701 | 12 | 55248424  | MUCL1        | 2.059±0.273  | 1.749±0.531  | 6.25E-04 |
| cg19044630 | 9  | 79521532  | PRUNE2       | -4.234±0.418 | -3.664±1.012 | 6.26E-04 |
| cg11714502 | 9  | 130640212 | AK1          | -1.369±0.443 | -0.922±0.744 | 6.28E-04 |
| cg04881903 | 2  | 85637116  | CAPG         | 0.89±0.329   | 0.539±0.594  | 6.30E-04 |
| cg13612524 | 8  | 37593879  | ERLIN2       | -3.122±0.287 | -2.886±0.361 | 6.32E-04 |
| cg05497616 | 5  | 110560372 | CAMK4        | -5.375±0.44  | -4.411±1.781 | 6.32E-04 |
| cg08385610 | 8  | 20112683  | LZTS1        | 3.287±0.34   | 2.808±0.855  | 6.32E-04 |
| cg16959606 | 1  | 169074934 | ATP1B1       | -4.41±0.313  | -4.641±0.326 | 6.32E-04 |
| cg25124030 | 11 | 73498278  | MRPL48       | -0.063±0.301 | -0.41±0.599  | 6.34E-04 |
| cg16202564 | 8  | 98881927  | MATN2        | -2.294±0.22  | -1.984±0.554 | 6.35E-04 |
| cg15774495 | 7  | 50861549  | GRB10        | -3.591±0.678 | -2.865±1.232 | 6.36E-04 |
| cg02293044 | 22 | 29703543  | GAS2L1       | -1.723±0.447 | -1.2±0.906   | 6.38E-04 |
| cg18999668 | 9  | 86983400  | SLC28A3      | 2.174±0.25   | 1.973±0.304  | 6.38E-04 |
| cg03568064 | 11 | 45907500  | MAPK8IP1     | -3.325±0.407 | -2.726±1.076 | 6.38E-04 |
| cg25182523 | 1  | 184944288 | FAM129A      | 0.123±0.246  | -0.389±0.944 | 6.38E-04 |
| cg03364504 | 1  | 113393176 | LOC100996702 | 2.627±0.267  | 2.046±1.074  | 6.40E-04 |
| cg09630437 | 19 | 2740301   | SLC39A3      | -3.058±0.22  | -3.418±0.653 | 6.41E-04 |
| cg12717594 | 9  | 36037454  | RECK         | -5.283±0.627 | -4.344±1.69  | 6.41E-04 |
| cg07269146 | 9  | 34710657  | CCL21        | 1.645±0.239  | 1.407±0.396  | 6.43E-04 |
| cg01263716 | 11 | 2951590   | PHLDA2       | -4.779±0.419 | -4.467±0.446 | 6.45E-04 |
| cg13315147 | 10 | 135341528 | CYP2E1       | -1.527±1.705 | -0.43±1.302  | 6.48E-04 |
| cg22639768 | 10 | 61122535  | FAM13C       | -4.509±0.482 | -4.005±0.853 | 6.50E-04 |
| cg15284635 | 3  | 10858504  | SLC6A11      | -0.807±0.234 | -0.483±0.577 | 6.50E-04 |
| cg19539004 | 22 | 30643376  | LIF          | -0.095±0.158 | -0.501±0.755 | 6.50E-04 |
| cg09879099 | 18 | 55102210  | ONECUT2      | -4.285±0.392 | -3.769±0.913 | 6.51E-04 |
| cg19525717 | 20 | 43160249  | PKIG         | -1.91±0.252  | -2.241±0.585 | 6.52E-04 |
| cg05511517 | 1  | 120612730 | NOTCH2       | -2.879±0.293 | -3.265±0.684 | 6.58E-04 |
| cg16542081 | 20 | 61041701  | GATA5        | 2.795±0.417  | 2.285±0.893  | 6.58E-04 |
| cg19764418 | 1  | 237205098 | RYR2         | -0.005±0.32  | 0.517±0.949  | 6.60E-04 |
| cg10681065 | 7  | 100239172 | TFR2         | 0.248±0.219  | 0.669±0.777  | 6.61E-04 |
| cg23338993 | 2  | 234600423 | UGT1A6       | 1.082±0.351  | 0.604±0.852  | 6.61E-04 |
| cg02899723 | 5  | 55033614  | DDX4         | 4.312±0.332  | 4.007±0.494  | 6.62E-04 |
| cg22571217 | 9  | 90112519  | DAPK1        | -4.756±0.428 | -4.403±0.543 | 6.63E-04 |
| cg24430616 | 8  | 23320416  | 0            | 1.734±0.265  | 1.478±0.424  | 6.65E-04 |
| cg12069042 | 3  | 48466700  | PLXNB1       | 0.658±0.266  | 1.058±0.723  | 6.66E-04 |

|            |    |           |                |              |              |          |
|------------|----|-----------|----------------|--------------|--------------|----------|
| cg04553559 | 8  | 37552657  | ZNF703         | -4.143±0.297 | -3.932±0.288 | 6.66E-04 |
| cg20291222 | 12 | 75784541  | GLIPR1L2       | -2.513±0.345 | -2.896±0.659 | 6.67E-04 |
| cg02629761 | 14 | 89020745  | PTPN21         | -3.493±0.312 | -3.227±0.417 | 6.69E-04 |
| cg02545192 | 5  | 1294729   | TERT           | -4.082±0.455 | -3.28±1.47   | 6.69E-04 |
| cg26853640 | 19 | 38879673  | GGN            | -4.304±0.366 | -3.835±0.828 | 6.70E-04 |
| cg02800334 | 8  | 124750855 | ANXA13         | 0.441±0.342  | 0.776±0.549  | 6.71E-04 |
| cg22967016 | 11 | 12131739  | MICAL2         | -4.452±0.451 | -4.083±0.567 | 6.73E-04 |
| cg14100184 | 16 | 851298    | GNG13          | -2.332±0.374 | -1.861±0.831 | 6.74E-04 |
| cg23504707 | 14 | 60712563  | PPM1A          | 2.39±0.196   | 2.183±0.353  | 6.76E-04 |
| cg24076830 | 6  | 29325133  | OR5V1          | 1.725±0.28   | 1.205±0.956  | 6.77E-04 |
| cg14314889 | 17 | 3336771   | OR1E2          | -1.334±0.212 | -1.688±0.647 | 6.78E-04 |
| cg07061145 | 15 | 78556178  | DNAJA4         | 2.258±0.33   | 1.909±0.594  | 6.78E-04 |
| cg23830611 | 16 | 14927461  | NOMO1          | -4.72±0.325  | -4.961±0.345 | 6.78E-04 |
| cg07914866 | 12 | 66583431  | IRAK3          | -2.14±0.366  | -1.461±1.251 | 6.80E-04 |
| cg14261309 | 1  | 53164287  | SELRC1         | -3.126±0.415 | -3.489±0.576 | 6.82E-04 |
| cg07434278 | 6  | 32006244  | CYP21A2        | 2.098±0.396  | 1.582±0.916  | 6.84E-04 |
| cg13726463 | 16 | 31439681  | COX6A2         | 1.899±0.294  | 2.393±0.905  | 6.84E-04 |
| cg15703357 | 2  | 97171449  | NEURL3         | 0.161±0.364  | -0.306±0.828 | 6.86E-04 |
| cg08917718 | 3  | 52002169  | PCBP4          | -3.807±0.434 | -3.396±0.678 | 6.89E-04 |
| cg01808508 | 3  | 64009536  | PSMD6          | -0.298±0.247 | -0.593±0.518 | 6.89E-04 |
| cg04603184 | 6  | 13924929  | RNF182         | -4.208±0.326 | -3.636±1.05  | 6.89E-04 |
| cg01869233 | 20 | 6035139   | LRRN4          | -1.641±0.396 | -1.237±0.682 | 6.92E-04 |
| cg24664957 | 12 | 123381003 | VPS37B         | 0.207±0.344  | 0.662±0.811  | 6.95E-04 |
| cg11653500 | 13 | 80915061  | SPRY2          | -3.351±0.748 | -2.739±0.942 | 6.95E-04 |
| cg15415545 | 16 | 30206046  | SLX1A-SULT1A3  | -4.826±0.455 | -4.039±1.445 | 6.96E-04 |
| cg19423196 | 10 | 82049429  | MAT1A          | -1.394±0.28  | -1.777±0.687 | 6.97E-04 |
| cg12095167 | 8  | 61428991  | RAB2A          | -2.757±0.484 | -3.102±0.477 | 6.97E-04 |
| cg06791867 | 11 | 44880944  | TSPAN18        | 2.487±0.273  | 1.895±1.102  | 6.97E-04 |
| cg00615241 | 19 | 839689    | PRTN3          | -1.052±0.241 | -0.61±0.816  | 6.98E-04 |
| cg00025991 | 10 | 736625    | DIP2C          | 0.198±0.19   | -0.007±0.351 | 6.99E-04 |
| cg15786541 | 3  | 110791063 | PVRL3          | -5.077±0.527 | -4.663±0.62  | 7.00E-04 |
| cg23173910 | 2  | 74120274  | ACTG2          | 1.807±0.211  | 2.06±0.444   | 7.01E-04 |
| cg26155617 | 6  | 110737501 | DDO            | 1.492±0.265  | 1.261±0.367  | 7.01E-04 |
| cg13265789 | 4  | 96470584  | UNC5C          | -3.279±0.648 | -2.565±1.231 | 7.02E-04 |
| cg01827098 | 7  | 150211152 | GIMAP7         | 2.355±0.453  | 1.852±0.87   | 7.02E-04 |
| cg07260017 | 5  | 149492480 | CSF1R          | 0.331±0.291  | -0.144±0.867 | 7.03E-04 |
| cg07789083 | 17 | 72427563  | GPRC5C         | -3.93±0.873  | -3.223±1.086 | 7.03E-04 |
| cg14343107 | 15 | 40453695  | BUB1B          | -4.892±0.251 | -5.109±0.344 | 7.04E-04 |
| cg22469841 | 3  | 120169368 | FSTL1          | -4.639±0.691 | -4.011±1.02  | 7.04E-04 |
| cg06668300 | 2  | 95691755  | MAL            | -4.739±0.517 | -3.873±1.589 | 7.05E-04 |
| cg02555579 | 22 | 18043043  | SLC25A18       | 0.352±0.281  | 0.666±0.545  | 7.06E-04 |
| cg11554937 | 9  | 99064321  | HSD17B3        | 3.479±0.214  | 3.233±0.428  | 7.07E-04 |
| cg11452221 | 12 | 58004830  | ARHGEF25       | -2.149±0.272 | -1.644±0.934 | 7.07E-04 |
| cg26955850 | 20 | 3052345   | OXT            | -0.604±0.309 | -0.194±0.732 | 7.07E-04 |
| cg15195353 | 16 | 4382775   | GLIS2          | 2.537±0.149  | 2.367±0.295  | 7.07E-04 |
| cg24115040 | 7  | 96652375  | DLX5           | -2.868±0.374 | -2.356±0.921 | 7.08E-04 |
| cg24680602 | 17 | 5026393   | ZNF232         | -3.358±0.477 | -2.676±1.231 | 7.10E-04 |
| cg20697204 | 2  | 47382593  | C2orf61        | 1.286±0.309  | 1.547±0.409  | 7.10E-04 |
| cg19292008 | 9  | 100615796 | FOXE1          | -3.989±0.443 | -3.28±1.296  | 7.14E-04 |
| cg18123948 | 8  | 11560781  | GATA4          | -1.989±0.414 | -1.439±0.982 | 7.15E-04 |
| cg25216696 | 8  | 11565351  | GATA4          | -1.182±0.748 | -0.503±1.105 | 7.15E-04 |
| cg13643796 | 4  | 73434209  | ADAMTS3        | -4.681±0.495 | -4.12±0.974  | 7.15E-04 |
| cg21041127 | 7  | 16922421  | AGR3           | 1.17±0.216   | 0.869±0.544  | 7.16E-04 |
| cg02077702 | 15 | 74465888  | ISLR           | 0.343±0.297  | 0.618±0.451  | 7.17E-04 |
| cg02828104 | 20 | 48770800  | TMEM189-UBE2V1 | -0.873±0.358 | -1.242±0.628 | 7.20E-04 |
| cg11997899 | 7  | 96654183  | DLX5           | -0.91±0.344  | -0.567±0.578 | 7.24E-04 |
| cg16243646 | 4  | 110651822 | PLA2G12A       | -3.363±0.316 | -3.589±0.314 | 7.25E-04 |
| cg26831415 | 8  | 16885270  | MICU3          | -5.206±0.854 | -4.264±1.631 | 7.26E-04 |
| cg15481539 | 8  | 6913441   | DEFA5          | 2.952±0.192  | 2.578±0.696  | 7.31E-04 |
| cg21065959 | 1  | 152758755 | LCE1E          | 0.702±0.214  | 0.369±0.608  | 7.32E-04 |
| cg20862119 | 12 | 53171017  | KRT76          | 2.196±0.173  | 1.907±0.533  | 7.32E-04 |
| cg21459867 | 4  | 981492    | IDUA           | 1.088±0.191  | 0.817±0.492  | 7.33E-04 |
| cg14401454 | 14 | 21497485  | TPPP2          | 3.285±0.284  | 2.984±0.517  | 7.34E-04 |
| cg09944147 | 9  | 116918247 | COL27A1        | -5.541±0.88  | -4.85±1.044  | 7.35E-04 |
| cg08623947 | 20 | 30640164  | HCK            | -4.519±0.424 | -3.642±1.636 | 7.35E-04 |
| cg01172972 | 1  | 52608558  | ZFYVE9         | -3.249±0.367 | -2.9±0.579   | 7.35E-04 |
| cg22062068 | 11 | 7110074   | RBMXL2         | 0.268±0.423  | -0.158±0.721 | 7.38E-04 |

|            |    |           |            |              |              |          |
|------------|----|-----------|------------|--------------|--------------|----------|
| cg14217157 | 4  | 2011877   | NELFA      | -2.811±0.318 | -3.081±0.427 | 7.38E-04 |
| cg05681757 | 12 | 32655034  | FGD4       | -1.214±0.36  | -0.681±0.97  | 7.39E-04 |
| cg20125091 | 1  | 92952641  | GFI1       | -1.485±0.239 | -0.94±1.023  | 7.40E-04 |
| cg01095482 | 1  | 43765796  | TIE1       | 2.55±0.366   | 2.861±0.492  | 7.41E-04 |
| cg17536071 | 4  | 71383999  | AMTN       | 0.724±0.311  | 0.357±0.639  | 7.43E-04 |
| cg06832039 | 7  | 153111226 | 0          | 3.006±0.321  | 2.76±0.364   | 7.45E-04 |
| cg26499611 | 16 | 1384311   | BAIAP3     | -3.084±0.229 | -2.626±0.855 | 7.45E-04 |
| cg18239753 | 6  | 62995963  | KHDRBS2    | -2.579±0.514 | -1.916±1.187 | 7.45E-04 |
| cg00187380 | 12 | 54427384  | MIR615     | -2.735±0.287 | -2.085±1.22  | 7.47E-04 |
| cg03860890 | 7  | 55086288  | EGFR       | -3.258±0.517 | -2.773±0.804 | 7.48E-04 |
| cg10240083 | 16 | 12608382  | SNX29      | 2.177±0.218  | 1.954±0.38   | 7.51E-04 |
| cg12532500 | 13 | 33859636  | STARD13    | -3.649±0.447 | -3.223±0.709 | 7.51E-04 |
| cg24901042 | 21 | 42880554  | TMPRSS2    | -3.522±0.476 | -2.951±1.009 | 7.54E-04 |
| cg07483064 | 1  | 8938751   | ENO1-AS1   | -5.229±0.457 | -4.883±0.512 | 7.55E-04 |
| cg03020951 | 6  | 34203887  | HMGA1      | -3.329±0.392 | -3.817±0.869 | 7.55E-04 |
| cg13703941 | 6  | 131465644 | AKAP7      | 1.857±0.336  | 1.479±0.661  | 7.55E-04 |
| cg08151470 | 1  | 10092299  | UBE4B      | -0.239±0.352 | -0.566±0.54  | 7.55E-04 |
| cg20483374 | 11 | 119211646 | C1QTNF5    | -2.402±0.552 | -1.803±1.038 | 7.55E-04 |
| cg26385286 | 6  | 10527815  | GCNT2      | -0.145±0.271 | 0.336±0.891  | 7.55E-04 |
| cg16823701 | 9  | 21440219  | IFNA1      | 1.79±0.305   | 1.509±0.462  | 7.55E-04 |
| cg02043070 | 14 | 105190158 | ADSSL1     | -4.963±0.491 | -5.32±0.509  | 7.57E-04 |
| cg17483510 | 3  | 179168677 | GNB4       | -3.377±0.457 | -2.461±1.71  | 7.57E-04 |
| cg01605984 | 9  | 136216154 | SNORD24    | 0.493±0.242  | 0.171±0.579  | 7.59E-04 |
| cg23328404 | 8  | 19539991  | CSGALNACT1 | -1.698±0.326 | -2.074±0.661 | 7.63E-04 |
| cg01919208 | 3  | 49170496  | LAMB2      | -1.237±0.427 | -0.844±0.648 | 7.63E-04 |
| cg21369988 | 12 | 30907191  | CAPRIN2    | -4.919±0.277 | -5.183±0.441 | 7.64E-04 |
| cg21550442 | 19 | 36499839  | SYNE4      | 0.394±0.335  | -0.132±0.966 | 7.65E-04 |
| cg20647137 | 7  | 137761289 | AKR1D1     | 2.841±0.187  | 2.632±0.364  | 7.65E-04 |
| cg13580728 | 9  | 95168155  | OGN        | 1.601±0.344  | 1.887±0.45   | 7.66E-04 |
| cg05807991 | 4  | 118006808 | TRAM1L1    | -3.134±0.881 | -2.375±1.217 | 7.66E-04 |
| cg12952136 | 4  | 71705777  | GRSF1      | -3.655±0.379 | -3.962±0.475 | 7.66E-04 |
| cg19706602 | 10 | 131265435 | MGMT       | -3.567±0.403 | -3.238±0.512 | 7.68E-04 |
| cg03574571 | 19 | 35820181  | CD22       | 1.747±0.396  | 1.204±0.981  | 7.69E-04 |
| cg22370370 | 17 | 47439802  | ZNF652     | -5.495±0.554 | -5.099±0.559 | 7.69E-04 |
| cg16026550 | 11 | 121323544 | SORL1      | -4.888±0.431 | -5.202±0.45  | 7.69E-04 |
| cg23771929 | 9  | 132934195 | NCS1       | -1.567±0.375 | -1.066±0.902 | 7.69E-04 |
| cg09034896 | 13 | 114321466 | GRK1       | 0.485±0.207  | 0.77±0.515   | 7.70E-04 |
| cg06613840 | 3  | 49395574  | GPX1       | -0.174±0.271 | -0.437±0.441 | 7.70E-04 |
| cg08296824 | 7  | 25019901  | OSBPL3     | -4.243±0.375 | -4.479±0.279 | 7.70E-04 |
| cg17095279 | 17 | 64225346  | APOH       | 0.893±0.381  | 0.228±1.233  | 7.72E-04 |
| cg14892768 | 19 | 41725332  | AXL        | -2.263±0.485 | -1.706±0.979 | 7.73E-04 |
| cg16606638 | 12 | 89918221  | GALNT4     | -3.692±0.441 | -3.218±0.82  | 7.73E-04 |
| cg26413827 | 13 | 72441184  | DACH1      | -3.61±0.459  | -3.186±0.7   | 7.73E-04 |
| cg21948783 | 12 | 49372474  | WNT1       | -2.564±0.258 | -2.082±0.899 | 7.73E-04 |
| cg08343834 | 17 | 15168658  | PMP22      | -0.329±0.307 | -0.736±0.734 | 7.74E-04 |
| cg18732541 | 19 | 7741602   | C19orf59   | -1.073±0.352 | -1.621±1.005 | 7.75E-04 |
| cg09881855 | 8  | 49834618  | SNAI2      | -4.512±0.294 | -3.943±1.063 | 7.75E-04 |
| cg10146929 | 6  | 26017939  | HIST1H1A   | -1.695±0.42  | -1.076±1.13  | 7.76E-04 |
| cg20349377 | 13 | 70683127  | KLHL1      | 1.722±0.263  | 1.479±0.402  | 7.76E-04 |
| cg04660234 | 9  | 37800484  | DCAF10     | -3.535±0.328 | -3.763±0.312 | 7.77E-04 |
| cg12515638 | 7  | 37956018  | SFRP4      | -3.274±0.494 | -2.601±1.22  | 7.81E-04 |
| cg07780979 | 5  | 303287    | AHRR       | 3.251±0.41   | 3.663±0.702  | 7.83E-04 |
| cg12402251 | 8  | 91094811  | CALB1      | -3.433±0.438 | -2.801±1.152 | 7.83E-04 |
| cg11115702 | 16 | 28986698  | SPNS1      | -3.402±0.373 | -2.923±0.859 | 7.85E-04 |
| cg27285616 | 1  | 2487110   | TNFRSF14   | -1.866±0.357 | -2.282±0.735 | 7.86E-04 |
| cg21637033 | 12 | 3068077   | TEAD4      | -4.298±0.499 | -3.846±0.742 | 7.86E-04 |
| cg18499731 | 15 | 25522171  | SNORD109B  | 1.422±0.287  | 1.087±0.592  | 7.87E-04 |
| cg08558340 | 7  | 100472263 | SRRT       | -1.402±0.409 | -0.849±1     | 7.90E-04 |
| cg23274030 | 10 | 120925632 | SFXN4      | -1.464±0.248 | -1.701±0.396 | 7.91E-04 |
| cg04969808 | 3  | 13922158  | WNT7A      | -3.413±0.279 | -2.905±0.947 | 7.91E-04 |
| cg04796162 | 7  | 45961102  | IGFBP3     | -3.841±0.555 | -3.286±0.944 | 7.98E-04 |
| cg26750747 | 11 | 71899966  | FOLR1      | 1.853±0.244  | 2.099±0.42   | 7.99E-04 |
| cg04305913 | 9  | 139228912 | GPSM1      | 2.151±0.209  | 1.829±0.593  | 8.03E-04 |
| cg05252264 | 19 | 55385587  | FCAR       | -0.141±0.33  | -0.607±0.842 | 8.05E-04 |
| cg01278291 | 5  | 176937363 | DOK3       | 1.39±0.349   | 1.001±0.682  | 8.06E-04 |
| cg20555507 | 9  | 73736452  | TRPM3      | -3.065±0.294 | -2.478±1.104 | 8.06E-04 |
| cg17469978 | 7  | 116164704 | CAV1       | -4.821±0.444 | -4.286±0.952 | 8.06E-04 |

|            |    |           |          |              |              |          |
|------------|----|-----------|----------|--------------|--------------|----------|
| cg18199266 | 2  | 71048136  | CLEC4F   | 1.673±0.243  | 1.439±0.395  | 8.07E-04 |
| cg10084993 | 16 | 2077647   | SLC9A3R2 | -2.055±0.382 | -1.698±0.597 | 8.10E-04 |
| cg09585781 | 17 | 61951136  | CSH2     | 0.15±0.174   | -0.161±0.58  | 8.11E-04 |
| cg03362494 | 3  | 195938668 | ZDHHC19  | 1.332±0.184  | 1.031±0.557  | 8.16E-04 |
| cg14494596 | 3  | 48542040  | SHISA5   | -2.817±0.356 | -2.519±0.476 | 8.19E-04 |
| cg07499072 | 5  | 52776694  | FST      | -3.336±0.315 | -2.866±0.862 | 8.19E-04 |
| cg27504805 | 4  | 156129725 | NPY2R    | -4.353±0.239 | -3.87±0.91   | 8.19E-04 |
| cg11990309 | 6  | 87647644  | HTR1E    | -2.05±0.354  | -1.57±0.873  | 8.21E-04 |
| cg00386408 | 5  | 135364970 | TGFB1    | -2.038±0.579 | -1.544±0.794 | 8.21E-04 |
| cg06692957 | 9  | 80647629  | GNAQ     | -4.071±0.461 | -3.691±0.6   | 8.22E-04 |
| cg16356956 | 22 | 37317934  | CSF2RB   | 2.449±0.315  | 2.191±0.405  | 8.25E-04 |
| cg10080004 | 19 | 55691827  | SYT5     | -3.078±0.38  | -2.687±0.673 | 8.27E-04 |
| cg24489015 | 17 | 56316162  | LPO      | 0.629±0.227  | 0.051±1.1    | 8.27E-04 |
| cg14141399 | 19 | 52228048  | HAS1     | 0.447±0.353  | 0.925±0.869  | 8.28E-04 |
| cg21509097 | 16 | 68279613  | PLA2G15  | -3.255±0.231 | -3.031±0.38  | 8.30E-04 |
| cg22577136 | 1  | 206644165 | IKBKE    | -5.144±0.497 | -5.646±0.861 | 8.31E-04 |
| cg08069899 | 12 | 4383770   | CCND2    | -3.857±0.335 | -3.126±1.383 | 8.32E-04 |
| cg02488871 | 2  | 219288203 | VIL1     | 1.536±0.178  | 1.755±0.392  | 8.33E-04 |
| cg22213042 | 7  | 129906627 | CPA2     | 1.915±0.311  | 1.475±0.806  | 8.33E-04 |
| cg17071957 | 9  | 124029926 | GSN      | -2.154±0.396 | -1.669±0.87  | 8.34E-04 |
| cg16854606 | 19 | 13080743  | DAND5    | 0.961±0.215  | 0.604±0.664  | 8.34E-04 |
| cg07297178 | 19 | 42193084  | CEACAM7  | 2.406±0.257  | 2.073±0.602  | 8.34E-04 |
| cg01986577 | 12 | 27485373  | ARNTL2   | -2.43±0.233  | -2.748±0.58  | 8.35E-04 |
| cg01262913 | 21 | 38580486  | DSCR9    | -2.136±0.419 | -2.592±0.8   | 8.36E-04 |
| cg09407859 | 16 | 66995461  | CES3     | 2.369±0.312  | 1.934±0.796  | 8.38E-04 |
| cg23075286 | 19 | 56687199  | GALP     | 0.818±0.22   | 1.088±0.484  | 8.40E-04 |
| cg13037275 | 11 | 94965364  | SESN3    | -3.817±0.455 | -3.156±1.216 | 8.41E-04 |
| cg00676660 | 3  | 64672609  | ADAMTS9  | -5.101±0.598 | -4.573±0.864 | 8.45E-04 |
| cg06956273 | 1  | 110155623 | GNAT2    | 2.335±0.236  | 2.042±0.527  | 8.46E-04 |
| cg06665322 | 1  | 167059365 | GPA33    | 2.028±0.392  | 1.518±0.924  | 8.47E-04 |
| cg11880211 | 17 | 61973468  | CSH1     | 2.552±0.117  | 2.411±0.251  | 8.48E-04 |
| cg26790059 | 5  | 156772562 | FNDC9    | 2.73±0.375   | 2.275±0.816  | 8.48E-04 |
| cg21625881 | 20 | 57430313  | GNAS     | 0.961±0.11   | 1.148±0.35   | 8.50E-04 |
| cg21697134 | 17 | 80693839  | FN3K     | -3.696±0.547 | -3.162±0.909 | 8.50E-04 |
| cg19133618 | 9  | 22008970  | CDKN2B   | -4.562±0.606 | -4.121±0.643 | 8.51E-04 |
| cg09119665 | 14 | 74181285  | PNMA1    | -4.925±0.497 | -5.371±0.737 | 8.52E-04 |
| cg22172494 | 11 | 2017362   | H19      | 1.145±0.217  | 1.476±0.613  | 8.53E-04 |
| cg01172735 | 1  | 28586943  | SESN2    | -3.674±0.367 | -3.341±0.552 | 8.53E-04 |
| cg20839149 | 1  | 156786601 | SH2D2A   | -1.58±0.323  | -2.121±1.008 | 8.54E-04 |
| cg14944269 | 14 | 65439602  | RAB15    | -0.947±0.319 | -1.333±0.692 | 8.55E-04 |
| cg15660077 | 17 | 7311620   | NLGN2    | 0.977±0.259  | 1.303±0.59   | 8.56E-04 |
| cg07432969 | 2  | 241569557 | GPR35    | 3.768±0.225  | 3.431±0.621  | 8.56E-04 |
| cg11800672 | 8  | 145642291 | SLC39A4  | 0.799±0.265  | 0.292±0.957  | 8.56E-04 |
| cg26359240 | 16 | 84179959  | DNAAF1   | 2.909±0.241  | 2.615±0.528  | 8.60E-04 |
| cg10608333 | 6  | 27799360  | HIST1H4K | -2.862±0.567 | -3.705±1.556 | 8.61E-04 |
| cg00158308 | 13 | 97646341  | OXGR1    | -2.613±0.394 | -1.978±1.182 | 8.62E-04 |
| cg05745457 | 4  | 164394816 | TKTL2    | 2.437±0.195  | 2.26±0.295   | 8.66E-04 |
| cg05163588 | 7  | 73498778  | LIMK1    | -3.522±0.267 | -3.728±0.315 | 8.66E-04 |
| cg15357945 | 11 | 57158361  | PRG2     | -0.181±0.205 | -0.549±0.692 | 8.69E-04 |
| cg18384097 | 1  | 202129566 | PTPN7    | 1.093±0.358  | 0.68±0.734   | 8.69E-04 |
| cg14108394 | 12 | 62997291  | C12orf61 | -4.492±0.475 | -4.167±0.447 | 8.70E-04 |
| cg19403377 | 17 | 53800225  | TMEM100  | -2.329±0.358 | -1.885±0.801 | 8.70E-04 |
| cg09935228 | 8  | 81557650  | ZNF704   | 3.188±0.349  | 2.889±0.484  | 8.70E-04 |
| cg06222851 | 10 | 50970358  | OGDHL    | -4.334±0.627 | -3.569±1.376 | 8.73E-04 |
| cg19216731 | 11 | 19223635  | CSRP3    | 0.601±0.287  | 0.277±0.575  | 8.77E-04 |
| cg13184872 | 22 | 44319719  | PNPLA3   | -2.913±0.37  | -2.547±0.629 | 8.77E-04 |
| cg17067993 | 17 | 38721675  | CCR7     | -0.094±0.317 | -0.576±0.894 | 8.77E-04 |
| cg23189044 | 11 | 74178114  | KCNE3    | -3.576±0.525 | -2.856±1.318 | 8.77E-04 |
| cg27371741 | 3  | 46619158  | TDGF1    | 1.36±0.353   | 1.745±0.678  | 8.79E-04 |
| cg14021073 | 11 | 1410385   | BRSK2    | -4.057±0.414 | -3.446±1.131 | 8.80E-04 |
| cg11874272 | 3  | 121773564 | CD86     | 0.411±0.253  | 0.042±0.682  | 8.80E-04 |
| cg26822241 | 10 | 96697661  | CYP2C9   | 2.54±0.227   | 2.219±0.591  | 8.81E-04 |
| cg02471507 | 8  | 82644747  | CHMP4C   | -4.655±0.456 | -5.019±0.57  | 8.81E-04 |
| cg26928603 | 1  | 157963176 | KIRREL   | -3.079±0.32  | -2.687±0.706 | 8.82E-04 |
| cg12114524 | 1  | 201390794 | TNNI1    | 1.252±0.177  | 0.898±0.669  | 8.83E-04 |
| cg09107315 | 1  | 78511488  | GIPC2    | -1.295±0.322 | -0.757±1.008 | 8.84E-04 |
| cg24833176 | 8  | 133788347 | PHF20L1  | -3.652±0.385 | -3.337±0.5   | 8.86E-04 |

|            |    |           |           |              |              |          |
|------------|----|-----------|-----------|--------------|--------------|----------|
| cg00859655 | 11 | 7694524   | CYB5R2    | 1.822±0.207  | 1.416±0.767  | 8.86E-04 |
| cg04107037 | 4  | 94750205  | ATOH1     | -3.026±0.498 | -2.439±1.051 | 8.89E-04 |
| cg20444256 | 19 | 45826341  | CKM       | -0.693±0.25  | -1.051±0.66  | 8.93E-04 |
| cg17132967 | 19 | 53142304  | ZNF83     | -1.457±0.407 | -0.955±0.907 | 8.95E-04 |
| cg13471990 | 10 | 97515222  | ENTPD1    | -1.237±0.298 | -1.616±0.69  | 8.95E-04 |
| cg16240480 | 1  | 236557473 | EDARADD   | -0.136±0.423 | -0.766±1.168 | 8.95E-04 |
| cg01216369 | 3  | 172859022 | SPATA16   | 3.551±0.466  | 2.944±1.105  | 8.95E-04 |
| cg21942438 | 3  | 40518091  | ZNF619    | 1.551±0.304  | 1.164±0.704  | 8.96E-04 |
| cg05011018 | 17 | 15585906  | TRIM16    | 1.908±0.211  | 1.685±0.391  | 8.96E-04 |
| cg06720956 | 15 | 53082145  | ONECUT1   | -4.362±0.461 | -3.909±0.776 | 8.97E-04 |
| cg25341653 | 16 | 67233277  | ELMO3     | 1.594±0.279  | 1.172±0.783  | 8.97E-04 |
| cg23641267 | 11 | 58343791  | LPXN      | 1.499±0.332  | 1.214±0.463  | 9.01E-04 |
| cg01507173 | 2  | 113816662 | IL36RN    | 0.757±0.29   | 1.141±0.702  | 9.02E-04 |
| cg20075229 | 19 | 41388937  | CYP2A7    | 2.589±0.195  | 2.419±0.279  | 9.07E-04 |
| cg24098951 | 8  | 105601036 | LRP12     | -4.932±0.725 | -4.309±1.019 | 9.08E-04 |
| cg15042080 | 8  | 109799756 | TMEM74    | -4.369±0.365 | -3.574±1.516 | 9.08E-04 |
| cg07842062 | 16 | 3306524   | MEFV      | 0.989±0.208  | 0.68±0.573   | 9.08E-04 |
| cg04273431 | 6  | 30523215  | PRR3      | -1.046±0.312 | -0.548±0.929 | 9.08E-04 |
| cg01173186 | 6  | 24126221  | NRSN1     | -1.198±0.22  | -0.935±0.472 | 9.12E-04 |
| cg18508525 | 7  | 80230062  | CD36      | 2.588±0.316  | 2.093±0.923  | 9.12E-04 |
| cg00949554 | 2  | 181845489 | UBE2E3    | -3.514±0.517 | -3.064±0.739 | 9.14E-04 |
| cg02248540 | 6  | 27776308  | HIST1H2AI | -4.418±0.462 | -3.922±0.874 | 9.14E-04 |
| cg15426734 | 16 | 67695272  | PARD6A    | -3.569±0.473 | -2.886±1.265 | 9.15E-04 |
| cg10333959 | 10 | 131354940 | MGMT      | 3.075±0.31   | 2.832±0.377  | 9.16E-04 |
| cg03513163 | 5  | 140431149 | PCDHB1    | -3.279±0.457 | -2.865±0.692 | 9.16E-04 |
| cg09539538 | 20 | 6104215   | FERMT1    | -0.059±0.22  | -0.361±0.556 | 9.22E-04 |
| cg16303453 | 16 | 66879016  | CA7       | -3.199±0.359 | -2.704±0.913 | 9.22E-04 |
| cg03462055 | 6  | 3227556   | TUBB2B    | -4.274±0.339 | -3.685±1.108 | 9.24E-04 |
| cg00116838 | 19 | 46001746  | PPM1N     | -3.677±0.287 | -3.156±0.983 | 9.26E-04 |
| cg18755783 | 13 | 36919905  | SPG20OS   | -4.153±0.706 | -3.472±1.167 | 9.28E-04 |
| cg00233307 | 19 | 39109076  | MAP4K1    | -2.383±0.545 | -1.657±1.333 | 9.28E-04 |
| cg16068833 | 1  | 26644515  | CD52      | 0.489±0.34   | 0.156±0.573  | 9.29E-04 |
| cg12603560 | 11 | 57090070  | TNKS1BP1  | -0.629±0.383 | -0.228±0.704 | 9.32E-04 |
| cg09980522 | 11 | 105481802 | GRIA4     | -1.33±0.49   | -0.92±0.665  | 9.35E-04 |
| cg07047653 | 12 | 50344626  | AQP2      | 2.579±0.219  | 2.31±0.489   | 9.40E-04 |
| cg22956483 | 11 | 2154432   | IGF2      | -0.49±0.228  | -0.766±0.5   | 9.43E-04 |
| cg17269277 | 4  | 1796142   | FGFR3     | -4.81±0.548  | -4.333±0.787 | 9.43E-04 |
| cg21513385 | 12 | 51663484  | SMAGP     | -2.169±0.305 | -2.513±0.614 | 9.48E-04 |
| cg08328671 | 14 | 96671262  | BDKRB2    | -3.08±0.538  | -2.571±0.868 | 9.50E-04 |
| cg17286640 | 4  | 55991202  | KDR       | -4.667±0.428 | -4.119±1.004 | 9.50E-04 |
| cg18651821 | 6  | 170894141 | PDCD2     | -5.164±0.381 | -5.437±0.397 | 9.55E-04 |
| cg15013019 | 19 | 13213451  | LYL1      | -2.843±0.425 | -2.261±1.074 | 9.56E-04 |
| cg21230392 | 4  | 16077697  | PROM1     | 2.964±0.161  | 2.772±0.348  | 9.57E-04 |
| cg21745164 | 16 | 23765304  | CHP2      | 0.041±0.275  | 0.38±0.616   | 9.57E-04 |
| cg17793621 | 15 | 26108084  | ATP10A    | -4.27±0.651  | -3.636±1.093 | 9.59E-04 |
| cg11154542 | 9  | 90340652  | CTSL      | -2.578±0.411 | -2.165±0.717 | 9.61E-04 |
| cg19963522 | 6  | 154677796 | IPCEF1    | 0.319±0.285  | -0.114±0.808 | 9.62E-04 |
| cg24262469 | 3  | 156391694 | TIPARP    | -1.708±0.388 | -2.023±0.503 | 9.63E-04 |
| cg18043195 | 9  | 19033231  | FAM154A   | 1.387±0.356  | 1.752±0.638  | 9.64E-04 |
| cg19219366 | 11 | 6495536   | TRIM3     | -3.575±0.416 | -3.218±0.588 | 9.69E-04 |
| cg12792367 | 7  | 100238750 | TFR2      | -0.111±0.209 | -0.429±0.595 | 9.70E-04 |
| cg04640913 | 20 | 44880515  | CDH22     | -0.649±0.229 | -0.939±0.53  | 9.71E-04 |
| cg02748427 | 1  | 92764574  | GLMN      | -3.674±0.299 | -3.434±0.381 | 9.71E-04 |
| cg00577464 | 7  | 155604780 | SHH       | -4.589±0.432 | -4.012±1.064 | 9.72E-04 |
| cg06490988 | 3  | 128212001 | GATA2     | -1.58±0.694  | -0.86±1.267  | 9.77E-04 |
| cg11255163 | 16 | 68771200  | CDH1      | -4.745±0.655 | -4.133±1.044 | 9.79E-04 |
| cg00644033 | 7  | 100544704 | 0         | 3.998±0.341  | 3.674±0.556  | 9.84E-04 |
| cg05898524 | 1  | 156083276 | LMNA      | -1.755±0.326 | -1.433±0.559 | 9.88E-04 |
| cg24356544 | 10 | 50970863  | OGDHL     | 1.525±0.395  | 1.853±0.532  | 9.89E-04 |
| cg18272264 | 2  | 152956036 | CACNB4    | -4.049±0.318 | -3.514±1.012 | 9.90E-04 |
| cg21877855 | 1  | 63989125  | EFCAB7    | -4.645±0.433 | -4.948±0.436 | 9.90E-04 |
| cg13335112 | 14 | 51339216  | ABHD12B   | 1.394±0.227  | 1.126±0.486  | 9.93E-04 |
| cg03021690 | 14 | 103591964 | TNFAIP2   | 2.761±0.199  | 2.593±0.275  | 9.94E-04 |
| cg11718090 | 1  | 145208654 | NOTCH2NL  | -2.811±0.288 | -3.173±0.661 | 9.97E-04 |
| cg04404982 | 16 | 30483287  | ITGAL     | 1.768±0.332  | 1.452±0.544  | 9.98E-04 |
| cg16708012 | 12 | 108992114 | TMEM119   | 0.309±0.219  | 0.616±0.569  | 9.98E-04 |
| cg22954265 | 20 | 29520583  | 0         | 1.991±0.352  | 1.737±0.374  | 9.98E-04 |

|            |    |           |           |              |              |          |
|------------|----|-----------|-----------|--------------|--------------|----------|
| cg19622372 | 22 | 42540696  | CYP2D7P1  | 2.682±0.176  | 2.55±0.199   | 9.98E-04 |
| cg15334028 | 19 | 10829162  | MIR638    | -3.246±0.268 | -3.017±0.378 | 9.98E-04 |
| cg21238457 | 11 | 75917353  | WNT11     | -4.216±0.322 | -3.579±1.217 | 1.00E-03 |
| cg02044161 | 3  | 136675705 | IL20RB    | 2.746±0.174  | 2.596±0.249  | 1.01E-03 |
| cg07384961 | 16 | 3068128   | CLDN6     | -3.025±0.375 | -2.332±1.322 | 1.01E-03 |
| cg02583151 | 14 | 61116211  | SIX1      | -3.768±0.382 | -3.31±0.834  | 1.01E-03 |
| cg23704362 | 8  | 67405742  | C8orf46   | 1.448±0.247  | 1.774±0.601  | 1.01E-03 |
| cg11960393 | 5  | 121414172 | LOX       | -4.512±0.486 | -4.147±0.559 | 1.01E-03 |
| cg23659398 | 8  | 22298060  | PPP3CC    | -2.945±0.366 | -3.323±0.667 | 1.02E-03 |
| cg08062469 | 17 | 26926627  | SPAG5-AS1 | -4.756±0.579 | -5.168±0.602 | 1.02E-03 |
| cg13735697 | 1  | 203055296 | MYOG      | 2.583±0.253  | 2.26±0.594   | 1.02E-03 |
| cg09374949 | 19 | 18548964  | ISYNA1    | -3.261±0.323 | -2.89±0.67   | 1.02E-03 |
| cg05510041 | 10 | 75758427  | VCL       | -3.779±0.313 | -3.504±0.46  | 1.02E-03 |
| cg01371477 | 1  | 150207822 | ANP32E    | -2.37±0.609  | -2.781±0.569 | 1.02E-03 |
| cg05358291 | 19 | 16009219  | CYP4F2    | 0.183±0.493  | -0.249±0.721 | 1.02E-03 |
| cg03752885 | 19 | 3969736   | DAPK3     | -0.587±0.377 | -0.152±0.785 | 1.02E-03 |
| cg09448875 | 10 | 101542449 | ABCC2     | 1.684±0.252  | 1.139±1.05   | 1.02E-03 |
| cg23303074 | 4  | 155665625 | LRAT      | -3.108±0.42  | -2.632±0.857 | 1.02E-03 |
| cg18989919 | 3  | 133648584 | C3orf36   | 3.083±0.188  | 2.75±0.635   | 1.02E-03 |
| cg01889448 | 6  | 32635871  | HLA-DQB1  | 0.799±0.318  | 0.347±0.807  | 1.02E-03 |
| cg26073060 | 1  | 32686736  | TMEM234   | 2.255±0.326  | 1.899±0.637  | 1.02E-03 |
| cg18780284 | 1  | 153004322 | SPRR1B    | 0.399±0.196  | -0.096±0.96  | 1.03E-03 |
| cg16050349 | 3  | 138478129 | PIK3CB    | 2.065±0.255  | 1.855±0.34   | 1.03E-03 |
| cg21673646 | 15 | 45479977  | SHF       | -5.459±0.4   | -4.874±1.096 | 1.03E-03 |
| cg01697732 | 17 | 66597500  | FAM20A    | -4.154±0.743 | -3.511±1.069 | 1.03E-03 |
| cg24492022 | 16 | 18802110  | RPS15A    | 2.351±0.3    | 2.01±0.615   | 1.03E-03 |
| cg22484793 | 3  | 52261325  | TLR9      | 1.475±0.231  | 1.25±0.391   | 1.03E-03 |
| cg08684473 | 19 | 54761090  | LILRB5    | 1.367±0.188  | 1.023±0.656  | 1.03E-03 |
| cg16307860 | 1  | 222886951 | BROX      | -2.315±0.372 | -2.011±0.491 | 1.04E-03 |
| cg11507178 | 11 | 118781515 | BCL9L     | -1.786±0.435 | -1.455±0.512 | 1.04E-03 |
| cg10726357 | 9  | 115653543 | SLC46A2   | 0.428±0.22   | 0.681±0.457  | 1.04E-03 |
| cg18493238 | 10 | 37414261  | ANKRD30A  | 3.684±0.353  | 3.249±0.797  | 1.04E-03 |
| cg21731286 | 1  | 19186805  | TAS1R2    | 2.768±0.154  | 2.492±0.528  | 1.04E-03 |
| cg27222589 | 12 | 52968762  | KRT74     | 1.706±0.276  | 1.505±0.301  | 1.04E-03 |
| cg16193203 | 10 | 75313138  | USP54     | 2.574±0.305  | 2.351±0.336  | 1.05E-03 |
| cg27619475 | 17 | 73083881  | SLC16A5   | -4.771±0.903 | -3.832±1.662 | 1.05E-03 |
| cg07054095 | 19 | 58038856  | ZNF549    | -4.967±0.433 | -4.118±1.629 | 1.05E-03 |
| cg22197708 | 11 | 59855616  | MS4A2     | 1.624±0.253  | 1.254±0.693  | 1.05E-03 |
| cg05362516 | 16 | 54965089  | IRX5      | -3.72±0.805  | -3.096±0.982 | 1.05E-03 |
| cg20657421 | 17 | 34430518  | CCL4      | 1.716±0.722  | 1.189±0.792  | 1.05E-03 |
| cg10708675 | 16 | 69760758  | NQO1      | -3.794±0.348 | -4.084±0.475 | 1.05E-03 |
| cg24358465 | 6  | 27100860  | HIST1H2AG | -5.229±0.502 | -3.961±2.462 | 1.05E-03 |
| cg09169283 | 17 | 72856452  | GRIN2C    | -3.486±0.257 | -3.069±0.792 | 1.06E-03 |
| cg10539808 | 18 | 24220737  | KCTD1     | 0.249±0.195  | -0.096±0.659 | 1.06E-03 |
| cg13406768 | 2  | 228192416 | MFF       | 1.557±0.307  | 1.902±0.623  | 1.06E-03 |
| cg07327347 | 16 | 25228004  | AQP8      | 0.619±0.263  | 0.215±0.763  | 1.06E-03 |
| cg09260830 | 9  | 80263587  | GNA14     | -3.037±0.389 | -2.677±0.617 | 1.07E-03 |
| cg12011267 | 14 | 104314583 | LINC00637 | -2.957±0.282 | -3.179±0.353 | 1.07E-03 |
| cg13274254 | 2  | 189157566 | GULP1     | -3.983±0.598 | -3.456±0.885 | 1.07E-03 |
| cg17775235 | 17 | 78450855  | NPTX1     | -3.934±0.377 | -3.307±1.192 | 1.07E-03 |
| cg10766289 | 12 | 53073506  | KRT1      | 1.999±0.244  | 1.547±0.866  | 1.07E-03 |
| cg25616762 | 5  | 1345650   | CLPTM1L   | -4.594±0.52  | -4.971±0.567 | 1.07E-03 |
| cg08317263 | 5  | 150603169 | CCDC69    | -4.546±0.354 | -3.887±1.264 | 1.07E-03 |
| cg22152192 | 16 | 21315153  | CRYM      | 1.42±0.353   | 1.708±0.461  | 1.07E-03 |
| cg25307902 | 20 | 10199210  | SNAP25    | -3.757±0.47  | -3.163±1.097 | 1.07E-03 |
| cg05483509 | 16 | 2563435   | ATP6V0C   | -2.959±0.32  | -2.304±1.264 | 1.07E-03 |
| cg05104081 | 18 | 8717011   | SOGA2     | 2.893±0.176  | 2.655±0.444  | 1.08E-03 |
| cg18374517 | 2  | 233271575 | ALPPL2    | 1.022±0.178  | 0.723±0.572  | 1.08E-03 |
| cg14046986 | 1  | 167599371 | RCSD1     | -5.566±0.517 | -4.783±1.478 | 1.08E-03 |
| cg03260744 | 1  | 36549062  | TEKT2     | 3.12±0.287   | 2.857±0.448  | 1.08E-03 |
| cg25446086 | 1  | 155829549 | SYT11     | -3.413±0.337 | -3.791±0.683 | 1.09E-03 |
| cg10590292 | 12 | 51717674  | BIN2      | 1.415±0.419  | 0.946±0.849  | 1.09E-03 |
| cg21665000 | 17 | 12569135  | MYOCD     | -3.796±0.438 | -3.323±0.848 | 1.09E-03 |
| cg18750756 | 17 | 4337231   | SPNS3     | -0.093±0.278 | -0.605±0.983 | 1.09E-03 |
| cg24354652 | 1  | 28502908  | PTAFR     | 1.564±0.272  | 1.252±0.568  | 1.10E-03 |
| cg01437411 | 12 | 7033911   | ATN1      | -2.195±0.336 | -2.532±0.594 | 1.10E-03 |
| cg08460435 | 1  | 109203610 | HENMT1    | -2.752±0.359 | -2.233±0.977 | 1.10E-03 |

|            |    |           |                 |              |              |          |
|------------|----|-----------|-----------------|--------------|--------------|----------|
| cg02200584 | 4  | 157892546 | <i>PDGFC</i>    | -4.327±0.758 | -3.768±0.853 | 1.10E-03 |
| cg23401756 | 16 | 68013981  | <i>DPEP3</i>    | 5.13±0.597   | 4.657±0.757  | 1.10E-03 |
| cg16225091 | 11 | 197224    | <i>ODF3</i>     | 2.111±0.26   | 1.701±0.779  | 1.11E-03 |
| cg18422443 | 12 | 88974386  | <i>KITLG</i>    | -3.464±0.671 | -2.964±0.771 | 1.11E-03 |
| cg00269932 | 19 | 55013296  | <i>LAIR2</i>    | 3.769±0.427  | 3.228±1.002  | 1.11E-03 |
| cg23900225 | 10 | 35894222  | <i>GJD4</i>     | 0.641±0.168  | 0.309±0.643  | 1.11E-03 |
| cg02947354 | 2  | 99917392  | <i>LYG1</i>     | 1.697±0.266  | 1.488±0.334  | 1.11E-03 |
| cg18236297 | 13 | 49280407  | <i>CYSLTR2</i>  | 1.483±0.553  | 1.037±0.723  | 1.11E-03 |
| cg24297976 | 2  | 20189487  | <i>WDR35</i>    | -4.222±0.335 | -4.499±0.454 | 1.11E-03 |
| cg25106814 | 9  | 26892479  | <i>CAAP1</i>    | -4.303±0.481 | -3.954±0.526 | 1.11E-03 |
| cg11530960 | 9  | 1052239   | <i>DMRT2</i>    | -2.718±0.347 | -2.205±0.971 | 1.12E-03 |
| cg07888040 | 15 | 51669526  | <i>GLDN</i>     | 2.581±0.282  | 2.327±0.434  | 1.12E-03 |
| cg24698533 | 10 | 30918625  | <i>LYZL2</i>    | 1.953±0.288  | 1.617±0.615  | 1.12E-03 |
| cg27377213 | 20 | 37433803  | <i>PPP1R16B</i> | -0.079±0.278 | 0.429±0.978  | 1.12E-03 |
| cg11094938 | 16 | 28888844  | <i>ATP2A1</i>   | 1.616±0.201  | 1.85±0.427   | 1.13E-03 |
| cg11521325 | 19 | 48808268  | <i>CCDC114</i>  | -0.235±0.219 | -0.569±0.635 | 1.13E-03 |
| cg09580336 | 1  | 116915122 | <i>ATP1A1</i>   | -2.118±0.264 | -2.453±0.622 | 1.13E-03 |
| cg03750606 | 1  | 217262978 | <i>ESRRG</i>    | -3.614±0.337 | -3.112±0.951 | 1.13E-03 |
| cg14329157 | 2  | 228736135 | <i>DAW1</i>     | -2.411±0.328 | -1.93±0.91   | 1.13E-03 |
| cg07699362 | 5  | 150400139 | <i>GPX3</i>     | -4.52±0.596  | -3.881±1.15  | 1.13E-03 |
| cg22686523 | 17 | 26940926  | <i>SGK494</i>   | 1.638±0.43   | 1.922±0.392  | 1.14E-03 |
| cg03686067 | 18 | 66504389  | <i>CCDC102B</i> | 1.848±0.321  | 1.469±0.696  | 1.14E-03 |
| cg21177096 | 2  | 20212440  | <i>MATN3</i>    | -4.635±0.732 | -4.014±1.034 | 1.14E-03 |
| cg02787991 | 17 | 80291405  | <i>SECTM1</i>   | -4.921±0.707 | -4.27±1.122  | 1.14E-03 |
| cg21448423 | 1  | 55013956  | <i>ACOT11</i>   | -0.677±0.29  | -0.266±0.774 | 1.14E-03 |
| cg23741330 | 6  | 116832940 | <i>FAM26E</i>   | -1.261±0.369 | -0.879±0.684 | 1.14E-03 |
| cg05958582 | 10 | 102090366 | <i>PKD2L1</i>   | 0.448±0.196  | 0.687±0.442  | 1.14E-03 |
| cg03075662 | 3  | 146213648 | <i>PLSCR2</i>   | 2.139±0.302  | 1.85±0.504   | 1.15E-03 |
| cg05722906 | 19 | 15783791  | <i>CYP4F12</i>  | -2.549±0.313 | -2.229±0.572 | 1.15E-03 |
| cg07664856 | 3  | 1134528   | <i>CNTN6</i>    | -1.556±0.351 | -1.124±0.799 | 1.15E-03 |
| cg04993257 | 19 | 5568163   | <i>TINCR</i>    | -1.122±0.292 | -0.767±0.657 | 1.15E-03 |
| cg14189614 | 5  | 33984660  | <i>SLC45A2</i>  | 2.064±0.111  | 1.95±0.203   | 1.16E-03 |
| cg18511007 | 7  | 94023822  | <i>COL1A2</i>   | -3.249±0.647 | -2.606±1.137 | 1.16E-03 |
| cg12741488 | 16 | 2933841   | <i>FLYWCH2</i>  | -4.156±0.401 | -3.857±0.465 | 1.16E-03 |
| cg15536230 | 21 | 44985092  | <i>HSF2BP</i>   | 2.226±0.476  | 1.787±0.757  | 1.16E-03 |
| cg12133004 | 12 | 48876160  | <i>C12orf54</i> | 2.41±0.402   | 2.023±0.679  | 1.16E-03 |
| cg01770400 | 1  | 173886485 | <i>SERPINC1</i> | 2.898±0.213  | 2.508±0.752  | 1.16E-03 |
| cg13547237 | 11 | 65687877  | <i>DRAP1</i>    | -1.542±0.25  | -1.255±0.525 | 1.16E-03 |
| cg24621354 | 7  | 115850382 | <i>TES</i>      | -4.454±0.424 | -4.745±0.422 | 1.16E-03 |
| cg20484352 | 4  | 38869779  | <i>FAM114A1</i> | -1.785±0.4   | -1.35±0.788  | 1.17E-03 |
| cg01234133 | 17 | 48279072  | <i>COL1A1</i>   | -2.635±0.45  | -1.904±1.4   | 1.17E-03 |
| cg11759378 | 3  | 109035469 | <i>DPPA2</i>    | 1.633±0.221  | 1.234±0.77   | 1.17E-03 |
| cg03277051 | 3  | 99356666  | <i>COL8A1</i>   | -4.437±0.337 | -4.057±0.694 | 1.18E-03 |
| cg16069910 | 19 | 17571528  | <i>NXNL1</i>    | 1.088±0.229  | 0.753±0.635  | 1.18E-03 |
| cg15898840 | 7  | 45960834  | <i>IGFBP3</i>   | -2.898±1.103 | -2.076±1.278 | 1.18E-03 |
| cg12937434 | 17 | 56405948  | <i>BZRAP1</i>   | -1.885±0.335 | -1.337±1.052 | 1.18E-03 |
| cg00250430 | 9  | 1051579   | <i>DMRT2</i>    | -2.94±0.393  | -2.366±1.09  | 1.18E-03 |
| cg14517922 | 7  | 65889460  | <i>0</i>        | 2.965±0.147  | 2.846±0.196  | 1.18E-03 |
| cg05322019 | 10 | 102732323 | <i>SEMA4G</i>   | 2.205±0.234  | 1.939±0.486  | 1.19E-03 |
| cg18979762 | 1  | 231560395 | <i>EGLN1</i>    | 1.677±0.305  | 1.974±0.523  | 1.19E-03 |
| cg10126923 | 19 | 51875451  | <i>NKG7</i>     | 1.661±0.297  | 1.135±1.015  | 1.19E-03 |
| cg07560096 | 11 | 86383182  | <i>ME3</i>      | -3.87±0.301  | -3.475±0.742 | 1.19E-03 |
| cg23679141 | 4  | 165118930 | <i>ANP32C</i>   | -1.918±0.367 | -2.266±0.611 | 1.19E-03 |
| cg20718816 | 14 | 75078842  | <i>LTBP2</i>    | -5.195±0.499 | -4.676±0.933 | 1.19E-03 |
| cg16204289 | 2  | 75796759  | <i>EVA1A</i>    | 1.992±0.16   | 1.694±0.578  | 1.19E-03 |
| cg18602919 | 15 | 23931674  | <i>NDN</i>      | 0.867±0.292  | 1.126±0.444  | 1.20E-03 |
| cg23617121 | 11 | 3121460   | <i>OSBPL5</i>   | 4.036±0.411  | 4.328±0.437  | 1.20E-03 |
| cg14059963 | 12 | 12815026  | <i>GPR19</i>    | 3.294±0.189  | 3.132±0.274  | 1.20E-03 |
| cg07728874 | 11 | 118213272 | <i>CD3D</i>     | 2.003±0.345  | 1.67±0.587   | 1.20E-03 |
| cg02318535 | 17 | 56832804  | <i>PPM1E</i>    | 1.199±0.319  | 1.538±0.613  | 1.20E-03 |
| cg27532722 | 22 | 24115568  | <i>MMP11</i>    | 0.316±0.253  | -0.109±0.82  | 1.21E-03 |
| cg11245384 | 20 | 1974646   | <i>PDYN</i>     | -0.333±0.197 | -0.653±0.615 | 1.21E-03 |
| cg04720358 | 17 | 9808263   | <i>RCVRN</i>    | 5.245±0.344  | 4.991±0.391  | 1.21E-03 |
| cg06025017 | 1  | 182419218 | <i>RGSL1</i>    | 1.419±0.218  | 1.017±0.779  | 1.21E-03 |
| cg08952029 | 11 | 74442900  | <i>CHRD2</i>    | 0.097±0.421  | 0.536±0.791  | 1.21E-03 |
| cg26155152 | 19 | 2943999   | <i>ZNF77</i>    | 1.951±0.275  | 1.57±0.722   | 1.21E-03 |
| cg18565355 | 8  | 95653874  | <i>ESRP1</i>    | -1.042±0.284 | -1.384±0.634 | 1.21E-03 |

|            |    |           |            |              |              |          |
|------------|----|-----------|------------|--------------|--------------|----------|
| cg17977409 | 9  | 17579227  | SH3GL2     | -2.948±0.615 | -2.197±1.398 | 1.22E-03 |
| cg15878317 | 3  | 139396782 | NMNAT3     | -4.035±0.492 | -3.359±1.277 | 1.22E-03 |
| cg19192120 | 11 | 67070517  | SSH3       | -3.199±0.48  | -2.84±0.563  | 1.22E-03 |
| cg00727947 | 19 | 54825100  | LILRA5     | 3.345±0.225  | 3.12±0.401   | 1.22E-03 |
| cg07354209 | 2  | 163100039 | FAP        | -0.834±0.35  | -1.213±0.689 | 1.23E-03 |
| cg07251788 | 22 | 19280165  | CLTCL1     | 1.869±0.518  | 1.393±0.827  | 1.23E-03 |
| cg11115427 | 10 | 13342610  | PHYH       | -2.628±0.358 | -2.295±0.581 | 1.24E-03 |
| cg03389133 | 22 | 37608611  | SSTR3      | -0.016±0.221 | 0.292±0.584  | 1.24E-03 |
| cg07189381 | 19 | 55660514  | TNNT1      | -1.85±0.333  | -1.483±0.67  | 1.24E-03 |
| cg06327515 | 5  | 140603261 | PCDHB14    | -1.648±0.359 | -1.216±0.802 | 1.24E-03 |
| cg25457027 | 2  | 128175179 | PROC       | 3.548±0.346  | 3.291±0.405  | 1.25E-03 |
| cg06069731 | 6  | 26043791  | HIST1H2BB  | -4.376±0.407 | -3.932±0.81  | 1.25E-03 |
| cg03714916 | 6  | 36645886  | CDKN1A     | -3.25±0.39   | -2.916±0.566 | 1.26E-03 |
| cg04807655 | 21 | 32930828  | TIAM1      | -4.39±0.403  | -3.643±1.455 | 1.26E-03 |
| cg13873733 | 4  | 83352560  | ENOPH1     | -3.014±0.315 | -3.272±0.427 | 1.26E-03 |
| cg07339327 | 11 | 69461109  | CCND1      | 3.446±0.442  | 3.724±0.365  | 1.26E-03 |
| cg00093177 | 17 | 37185495  | LRRC37A11P | 2.372±0.234  | 2.186±0.304  | 1.26E-03 |
| cg01442426 | 3  | 46069366  | XCR1       | 2.384±0.25   | 2.011±0.713  | 1.26E-03 |
| cg25168545 | 7  | 150413893 | GIMAP1     | -0.935±0.237 | -1.4±0.908   | 1.27E-03 |
| cg01892727 | 3  | 3221728   | CRBN       | -2.301±0.293 | -2.531±0.372 | 1.27E-03 |
| cg16977035 | 11 | 44330474  | ALX4       | 0.339±0.245  | 0.657±0.6    | 1.27E-03 |
| cg11757293 | 8  | 145692581 | KIFC2      | -2.104±0.286 | -2.353±0.427 | 1.27E-03 |
| cg24030449 | 8  | 16859671  | FGF20      | -2.879±0.371 | -2.432±0.833 | 1.27E-03 |
| cg23674788 | 17 | 39623313  | KRT32      | 1.759±0.249  | 1.509±0.449  | 1.27E-03 |
| cg09018824 | 4  | 41361919  | LIMCH1     | 0.439±0.246  | -0.004±0.86  | 1.27E-03 |
| cg25569462 | 4  | 189026860 | TRIML2     | 2.443±0.783  | 1.831±0.987  | 1.27E-03 |
| cg10198837 | 2  | 87090202  | CD8B       | 3.802±0.295  | 3.581±0.35   | 1.28E-03 |
| cg24443925 | 17 | 16118806  | NCOR1      | -3.296±0.313 | -3.055±0.387 | 1.28E-03 |
| cg11503011 | 5  | 158526729 | EBF1       | -3.348±0.473 | -2.877±0.843 | 1.28E-03 |
| cg11911418 | 18 | 48493759  | ELAC1      | 3.607±0.314  | 3.194±0.78   | 1.28E-03 |
| cg16894211 | 22 | 33403542  | SYN3       | 1.26±0.244   | 0.826±0.844  | 1.28E-03 |
| cg01638025 | 8  | 25041768  | DOCK5      | -5.099±0.658 | -4.554±0.912 | 1.28E-03 |
| cg24593475 | 8  | 49833956  | SNAI2      | -5.045±0.513 | -4.439±1.126 | 1.28E-03 |
| cg03782453 | 4  | 7043935   | CCDC96     | -0.864±0.402 | -0.428±0.798 | 1.28E-03 |
| cg22368262 | 10 | 71390173  | C10orf35   | -2.604±0.675 | -2.067±0.882 | 1.28E-03 |
| cg02071305 | 15 | 41185973  | VPS18      | -2.702±0.302 | -2.341±0.672 | 1.28E-03 |
| cg00995152 | 9  | 124496315 | DAB2IP     | 0.492±0.257  | 0.202±0.535  | 1.28E-03 |
| cg25982743 | 3  | 12200236  | TIMP4      | -0.151±0.355 | -0.498±0.618 | 1.29E-03 |
| cg21232015 | 12 | 133424221 | CHFR       | 2.401±0.246  | 2.141±0.471  | 1.29E-03 |
| cg27292431 | 6  | 160543261 | SLC22A1    | 2.81±0.214   | 2.633±0.298  | 1.29E-03 |
| cg15862544 | 19 | 42840403  | MEGF8      | 2.398±0.19   | 2.248±0.245  | 1.29E-03 |
| cg14154330 | 17 | 43503401  | ARHGAP27   | -0.243±0.272 | -0.584±0.642 | 1.29E-03 |
| cg08993557 | 15 | 25231326  | SNORD108   | 0.8±0.237    | 0.517±0.528  | 1.29E-03 |
| cg21022247 | 12 | 51718310  | BIN2       | 2.426±0.423  | 2.047±0.656  | 1.29E-03 |
| cg01103730 | 1  | 207038704 | IL20       | 3.244±0.322  | 2.88±0.672   | 1.29E-03 |
| cg04527989 | 5  | 71614752  | MRPS27     | 1.284±0.293  | 1.004±0.495  | 1.30E-03 |
| cg07850221 | 19 | 36235109  | U2AF1L4    | 2.75±0.238   | 2.591±0.229  | 1.30E-03 |
| cg14167596 | 4  | 4862910   | MSX1       | -3.573±0.418 | -2.986±1.12  | 1.30E-03 |
| cg08654655 | 1  | 159141063 | CADM3      | -1.588±0.349 | -1.181±0.758 | 1.30E-03 |
| cg01557297 | 14 | 23822017  | SLC22A17   | -4.947±0.818 | -4.047±1.654 | 1.30E-03 |
| cg24046474 | 9  | 130212550 | RPL12      | -1.573±0.369 | -1.938±0.655 | 1.30E-03 |
| cg01346152 | 1  | 12678761  | DHRS3      | -3.374±0.385 | -3.654±0.433 | 1.30E-03 |
| cg23398241 | 2  | 233390712 | CHRNA      | -2.82±0.381  | -2.464±0.627 | 1.30E-03 |
| cg23695504 | 1  | 247275344 | C1orf229   | -2.348±1.01  | -1.628±1.098 | 1.30E-03 |
| cg17559711 | 14 | 23451724  | AJUBA      | -5.324±0.399 | -4.981±0.585 | 1.31E-03 |
| cg07836370 | 12 | 110318755 | GLTP       | -4.269±0.282 | -4.49±0.359  | 1.31E-03 |
| cg14918082 | 17 | 7833237   | KCNAB3     | 1.224±0.35   | 1.652±0.801  | 1.31E-03 |
| cg14550518 | 3  | 21792938  | ZNF385D    | -4.168±0.375 | -3.762±0.745 | 1.31E-03 |
| cg00896220 | 17 | 34639327  | CCL4L2     | 1.657±0.693  | 1.155±0.779  | 1.32E-03 |
| cg22930187 | 1  | 44398959  | ARTN       | -0.889±0.256 | -1.217±0.619 | 1.32E-03 |
| cg19280776 | 8  | 82024586  | PAG1       | -2.622±0.236 | -2.904±0.528 | 1.32E-03 |
| cg03003745 | 19 | 42948167  | CXCL17     | -0.286±0.216 | -0.689±0.787 | 1.32E-03 |
| cg15637528 | 6  | 4078959   | C6orf201   | 3.723±0.249  | 3.902±0.276  | 1.32E-03 |
| cg26952662 | 8  | 104383499 | CTHRC1     | -3.331±0.635 | -4.049±1.327 | 1.32E-03 |
| cg00521434 | 1  | 110081965 | GPR61      | 2.663±0.232  | 2.258±0.789  | 1.33E-03 |
| cg06806080 | 3  | 107810791 | CD47       | 2.51±0.278   | 2.872±0.686  | 1.33E-03 |
| cg26081812 | 5  | 131880480 | IL5        | 1.797±0.289  | 1.536±0.454  | 1.33E-03 |

|            |    |           |          |              |              |          |
|------------|----|-----------|----------|--------------|--------------|----------|
| cg17178888 | 5  | 159739851 | CCNJL    | -4.777±0.466 | -4.401±0.623 | 1.33E-03 |
| cg00903242 | 3  | 238161    | CHL1     | -2.927±0.384 | -2.415±0.973 | 1.33E-03 |
| cg16898420 | 9  | 103791078 | LPPR1    | -3.138±0.528 | -2.621±0.924 | 1.33E-03 |
| cg04450876 | 12 | 54866945  | GTSF1    | 2.66±0.241   | 2.228±0.844  | 1.33E-03 |
| cg15967525 | 4  | 40517938  | RBM47    | -0.03±0.292  | -0.445±0.794 | 1.34E-03 |
| cg02611419 | 6  | 39282532  | KCNK17   | 0.19±0.321   | -0.352±1.057 | 1.34E-03 |
| cg22585988 | 1  | 161059327 | PVRL4    | 0.696±0.265  | 0.33±0.7     | 1.35E-03 |
| cg07944811 | 7  | 44228830  | GCK      | 2.723±0.27   | 2.431±0.537  | 1.35E-03 |
| cg19357849 | 19 | 8071093   | ELAVL1   | -3.374±0.311 | -3.65±0.48   | 1.35E-03 |
| cg10541755 | 3  | 170625872 | EIF5A2   | -4.548±0.386 | -3.671±1.735 | 1.35E-03 |
| cg16969623 | 19 | 54024182  | ZNF331   | -4.757±0.488 | -4.236±0.954 | 1.35E-03 |
| cg19539519 | 17 | 26553687  | PYY2     | 3.615±0.311  | 3.386±0.36   | 1.36E-03 |
| cg19485804 | 2  | 233878714 | NGEF     | 1.736±0.268  | 1.342±0.758  | 1.36E-03 |
| cg21440587 | 6  | 31583458  | AIF1     | -2.187±0.283 | -1.729±0.89  | 1.36E-03 |
| cg05511685 | 17 | 63184288  | RGS9     | 2.004±0.328  | 1.583±0.797  | 1.36E-03 |
| cg06284244 | 18 | 813059    | YES1     | -4.562±0.351 | -4.853±0.491 | 1.37E-03 |
| cg11768886 | 4  | 5052795   | STK32B   | -5.239±0.551 | -4.752±0.844 | 1.37E-03 |
| cg06730286 | 16 | 1657372   | IFT140   | 2.15±0.397   | 2.409±0.363  | 1.37E-03 |
| cg18466173 | 21 | 46726267  | 0        | 2.219±0.176  | 1.956±0.508  | 1.37E-03 |
| cg25494064 | 9  | 100286340 | TMOD1    | 2.005±0.227  | 1.842±0.253  | 1.37E-03 |
| cg22699362 | 2  | 118775427 | 0        | 1.304±0.267  | 0.945±0.663  | 1.37E-03 |
| cg21353232 | 22 | 26564879  | SEZ6L    | -2.975±0.423 | -2.438±1.016 | 1.37E-03 |
| cg11080718 | 3  | 42846415  | HIGD1A   | -2.854±0.362 | -3.107±0.382 | 1.38E-03 |
| cg23460697 | 16 | 4902898   | UBN1     | 1.529±0.22   | 1.697±0.272  | 1.38E-03 |
| cg04000821 | 19 | 55014066  | LAIR2    | -0.817±0.314 | -1.315±0.966 | 1.38E-03 |
| cg14667273 | 1  | 1369934   | VWA1     | -3.324±0.476 | -2.68±1.231  | 1.38E-03 |
| cg05873268 | 16 | 1290058   | TPSAB1   | 1.487±0.196  | 1.17±0.617   | 1.38E-03 |
| cg21591452 | 17 | 79304628  | TMEM105  | 2.474±0.396  | 1.863±1.183  | 1.38E-03 |
| cg17028039 | 10 | 123357695 | FGFR2    | -2.615±0.698 | -2.091±0.838 | 1.38E-03 |
| cg19403346 | 4  | 183066597 | MGC45800 | -2.911±0.407 | -2.515±0.71  | 1.38E-03 |
| cg06943865 | 7  | 94293780  | PEG10    | 2.871±0.179  | 2.69±0.329   | 1.38E-03 |
| cg06667406 | 7  | 121773889 | AASS     | 2.416±0.215  | 2.216±0.354  | 1.38E-03 |
| cg23578193 | 1  | 202163189 | LGR6     | -4.597±0.601 | -4.09±0.864  | 1.39E-03 |
| cg20239740 | 19 | 55690495  | SYT5     | -4.509±0.295 | -3.715±1.585 | 1.39E-03 |
| cg19046959 | 1  | 36565856  | COL8A2   | -3.057±0.462 | -3.377±0.482 | 1.39E-03 |
| cg09425228 | 2  | 228678005 | CCL20    | 1.981±0.234  | 1.702±0.524  | 1.39E-03 |
| cg20210637 | 20 | 1246100   | SNPH     | 3.108±0.213  | 2.916±0.337  | 1.39E-03 |
| cg06692050 | 10 | 99532398  | SFRP5    | 2.456±0.428  | 2.994±1.019  | 1.40E-03 |
| cg17749520 | 17 | 42466567  | ITGA2B   | 3.281±0.186  | 3.054±0.426  | 1.40E-03 |
| cg12874092 | 10 | 17271519  | VIM      | -5.988±0.658 | -4.745±2.447 | 1.40E-03 |
| cg13795840 | 19 | 1274794   | C19orf24 | 0.814±0.308  | 1.228±0.79   | 1.40E-03 |
| cg11600161 | 11 | 67171585  | TBC1D10C | 0.956±0.302  | 0.624±0.612  | 1.40E-03 |
| cg11099899 | 21 | 37852334  | CLDN14   | 0.565±0.193  | 0.796±0.435  | 1.40E-03 |
| cg14833160 | 19 | 49457855  | BAX      | -3.648±0.414 | -3.965±0.515 | 1.41E-03 |
| cg15149938 | 22 | 50018392  | C22orf34 | 0.916±0.282  | 0.504±0.795  | 1.41E-03 |
| cg20217872 | 12 | 78224480  | NAV3     | -1.987±0.28  | -2.433±0.867 | 1.41E-03 |
| cg13042288 | 15 | 90349979  | ANPEP    | 2.513±0.249  | 2.03±0.953   | 1.41E-03 |
| cg19561774 | 6  | 160679690 | SLC22A2  | 2.872±0.281  | 2.659±0.343  | 1.42E-03 |
| cg26815414 | 13 | 113300120 | C13orf35 | 1.325±0.301  | 1.648±0.596  | 1.42E-03 |
| cg08247612 | 1  | 160336486 | NHLH1    | 1.774±0.251  | 2.101±0.623  | 1.42E-03 |
| cg07572341 | 20 | 22565881  | FOXA2    | -2.934±0.521 | -2.452±0.853 | 1.42E-03 |
| cg23218877 | 10 | 35536010  | CCNY     | 1.637±0.244  | 1.417±0.386  | 1.42E-03 |
| cg14087150 | 17 | 39316639  | KRTAP4-4 | 1.473±0.185  | 1.285±0.342  | 1.42E-03 |
| cg03454353 | 9  | 115819364 | ZFP37    | -2.261±0.666 | -1.6±1.196   | 1.42E-03 |
| cg09748975 | 4  | 4864532   | MSX1     | 1.576±0.303  | 1.934±0.673  | 1.42E-03 |
| cg21787291 | 6  | 124125170 | NKAIN2   | -3.918±0.874 | -3.003±1.68  | 1.43E-03 |
| cg05532892 | 11 | 14666436  | PDE3B    | -4.863±0.393 | -4.367±0.941 | 1.44E-03 |
| cg04790874 | 19 | 42381950  | CD79A    | 1.148±0.33   | 0.749±0.753  | 1.44E-03 |
| cg17829936 | 6  | 132910681 | TAAR5    | 0.755±0.579  | 0.278±0.808  | 1.44E-03 |
| cg22367970 | 1  | 155826954 | GON4L    | -2.315±0.477 | -2.675±0.58  | 1.44E-03 |
| cg03657766 | 2  | 172967014 | DLX2     | -4.494±0.466 | -3.736±1.48  | 1.44E-03 |
| cg26904406 | 6  | 111927312 | TRAF3IP2 | -4.035±0.384 | -4.401±0.655 | 1.44E-03 |
| cg00888479 | 20 | 19193824  | SLC24A3  | -2.506±0.479 | -1.948±1.046 | 1.44E-03 |
| cg07388493 | 1  | 39491459  | NDUFS5   | -0.044±0.279 | -0.389±0.654 | 1.45E-03 |
| cg13126790 | 6  | 160010346 | 0        | 1.103±0.302  | 0.798±0.555  | 1.45E-03 |
| cg20277250 | 5  | 74061999  | NSA2     | 2.281±0.211  | 1.934±0.68   | 1.45E-03 |
| cg13833831 | 19 | 3802558   | MATK     | 2.101±0.216  | 1.693±0.807  | 1.45E-03 |

|            |    |           |                  |              |              |          |
|------------|----|-----------|------------------|--------------|--------------|----------|
| cg15464148 | 12 | 6745057   | <i>LPAR5</i>     | 0.674±0.264  | 0.344±0.627  | 1.46E-03 |
| cg21927975 | 1  | 6320757   | <i>GPR153</i>    | -3.919±0.458 | -4.242±0.498 | 1.46E-03 |
| cg18952560 | 20 | 1875040   | <i>SIRPA</i>     | -3.89±0.709  | -3.127±1.412 | 1.47E-03 |
| cg27360098 | 7  | 73442480  | <i>ELN</i>       | -2.978±0.64  | -2.367±1.097 | 1.47E-03 |
| cg18777554 | 12 | 97042657  | <i>0</i>         | 4.063±0.295  | 3.748±0.58   | 1.47E-03 |
| cg13571802 | 3  | 44916473  | <i>TGM4</i>      | 2.373±0.296  | 2±0.711      | 1.48E-03 |
| cg11638200 | 10 | 6621965   | <i>PRKCQ</i>     | -5.317±0.428 | -4.573±1.465 | 1.48E-03 |
| cg01868782 | 6  | 126071099 | <i>HEY2</i>      | -3.846±0.298 | -3.335±1.006 | 1.48E-03 |
| cg04276232 | 4  | 70362022  | <i>UGT2B4</i>    | 1.814±0.25   | 1.59±0.394   | 1.48E-03 |
| cg07327468 | 6  | 133561765 | <i>EYA4</i>      | -2.387±0.33  | -1.932±0.878 | 1.48E-03 |
| cg26829529 | 17 | 31317536  | <i>SPACA3</i>    | -0.178±0.213 | -0.6±0.837   | 1.49E-03 |
| cg24798047 | 1  | 204183655 | <i>GOLT1A</i>    | -0.223±0.252 | 0.16±0.745   | 1.49E-03 |
| cg15352315 | 2  | 160655036 | <i>CD302</i>     | -2.205±0.482 | -1.717±0.893 | 1.49E-03 |
| cg03532957 | 15 | 101792098 | <i>CHSY1</i>     | -4.141±0.413 | -3.882±0.354 | 1.49E-03 |
| cg22959932 | 3  | 8693706   | <i>SSUH2</i>     | 1.825±0.234  | 1.452±0.73   | 1.50E-03 |
| cg18472228 | 10 | 28966822  | <i>BAMBI</i>     | -3.1±0.31    | -2.896±0.295 | 1.51E-03 |
| cg13765621 | 1  | 158149228 | <i>CD1D</i>      | -1.475±0.274 | -2.017±1.077 | 1.51E-03 |
| cg08727202 | 22 | 37414747  | <i>TST</i>       | -0.458±0.289 | -0.113±0.653 | 1.51E-03 |
| cg07935151 | 6  | 31774618  | <i>LSM2</i>      | -3.901±0.348 | -3.66±0.366  | 1.51E-03 |
| cg19935424 | 17 | 74706305  | <i>MXRA7</i>     | -4.052±0.379 | -3.729±0.559 | 1.51E-03 |
| cg15166050 | 15 | 66857133  | <i>LCTL</i>      | 3.623±0.353  | 3.384±0.355  | 1.51E-03 |
| cg25250998 | 10 | 106028373 | <i>MIR4482-1</i> | -4.134±0.441 | -4.48±0.577  | 1.51E-03 |
| cg22406518 | 3  | 134093627 | <i>AMOTL2</i>    | -3.33±0.271  | -3.099±0.401 | 1.52E-03 |
| cg00431549 | 12 | 15039025  | <i>MGP</i>       | -1.378±0.302 | -0.921±0.891 | 1.52E-03 |
| cg04378886 | 19 | 50031395  | <i>RCN3</i>      | -1.29±0.404  | -0.605±1.348 | 1.52E-03 |
| cg10821722 | 11 | 64571899  | <i>MAP4K2</i>    | 3.548±0.363  | 3.218±0.585  | 1.53E-03 |
| cg05942574 | 17 | 48637104  | <i>CACNA1G</i>   | -3.353±0.22  | -2.931±0.838 | 1.53E-03 |
| cg10878998 | 18 | 71959092  | <i>CYB5A</i>     | -3.908±0.451 | -3.532±0.645 | 1.53E-03 |
| cg14191360 | 7  | 116311773 | <i>MET</i>       | -3.646±0.27  | -3.876±0.4   | 1.55E-03 |
| cg23074453 | 15 | 44487924  | <i>FRMD5</i>     | -3.682±0.401 | -3.97±0.454  | 1.55E-03 |
| cg06813842 | 15 | 43910131  | <i>STRC</i>      | 0.442±0.187  | 0.224±0.413  | 1.55E-03 |
| cg25635500 | 22 | 29712139  | <i>RASL10A</i>   | -1.798±0.277 | -1.302±0.983 | 1.55E-03 |
| cg18793806 | 2  | 95826087  | <i>ZNF514</i>    | -1.384±0.319 | -0.96±0.817  | 1.55E-03 |
| cg19742789 | 5  | 159739256 | <i>CCNJL</i>     | -4.113±0.547 | -3.669±0.753 | 1.55E-03 |
| cg25934198 | 9  | 139920781 | <i>C9orf139</i>  | 2.557±0.245  | 2.382±0.275  | 1.56E-03 |
| cg15278682 | 10 | 71175852  | <i>TACR2</i>     | 3.558±0.222  | 3.365±0.338  | 1.57E-03 |
| cg01305625 | 5  | 131593812 | <i>PDLIM4</i>    | 0.971±0.305  | 0.635±0.63   | 1.57E-03 |
| cg14133708 | 18 | 2846834   | <i>EMILIN2</i>   | -3.629±0.392 | -3.14±0.937  | 1.57E-03 |
| cg11905488 | 12 | 10123604  | <i>CLEC12A</i>   | 1.625±0.276  | 1.177±0.881  | 1.57E-03 |
| cg09643186 | 14 | 65409452  | <i>GPX2</i>      | 2.981±0.487  | 2.339±1.237  | 1.58E-03 |
| cg17642353 | 19 | 43423265  | <i>PSG6</i>      | 2.501±0.247  | 2.272±0.41   | 1.58E-03 |
| cg16303562 | 8  | 16050333  | <i>MSR1</i>      | -0.441±0.23  | -0.129±0.605 | 1.58E-03 |
| cg15840658 | 9  | 72287152  | <i>APBA1</i>     | -4.363±0.716 | -3.809±0.918 | 1.58E-03 |
| cg03116740 | 11 | 841335    | <i>POLR2L</i>    | 0.92±0.199   | 0.58±0.672   | 1.58E-03 |
| cg00010193 | 4  | 1145216   | <i>0</i>         | 0.305±0.141  | 0.2±0.17     | 1.58E-03 |
| cg27226949 | 13 | 107187177 | <i>EFNB2</i>     | -4.743±0.552 | -4.169±1.063 | 1.58E-03 |
| cg05619712 | 2  | 208994720 | <i>CRYGC</i>     | 1.015±0.262  | 1.296±0.524  | 1.59E-03 |
| cg08274234 | 7  | 83277971  | <i>SEMA3E</i>    | -3.693±0.502 | -3.21±0.876  | 1.59E-03 |
| cg17465304 | 9  | 116861442 | <i>KIF12</i>     | -0.498±0.376 | -0.025±0.908 | 1.59E-03 |
| cg22637834 | 1  | 244007281 | <i>AKT3</i>      | 2.984±0.312  | 2.604±0.726  | 1.59E-03 |
| cg05010058 | 2  | 65284262  | <i>CEP68</i>     | -4.062±0.459 | -3.729±0.532 | 1.60E-03 |
| cg09434995 | 7  | 76040387  | <i>SRCRB4D</i>   | 1.598±0.177  | 1.427±0.311  | 1.60E-03 |
| cg01375871 | 16 | 1305420   | <i>TPSD1</i>     | 0.24±0.22    | -0.137±0.746 | 1.60E-03 |
| cg16114640 | 13 | 52980000  | <i>THSD1</i>     | -3.731±0.626 | -3.196±0.933 | 1.60E-03 |
| cg00901493 | 17 | 7197375   | <i>YBX2</i>      | -3.601±0.383 | -3.199±0.747 | 1.60E-03 |
| cg23833452 | 6  | 146864752 | <i>RAB32</i>     | -2.348±0.733 | -1.819±0.843 | 1.61E-03 |
| cg07404485 | 7  | 94953653  | <i>PON1</i>      | 0.1±0.382    | 0.57±0.901   | 1.61E-03 |
| cg03931808 | 19 | 14139099  | <i>RLN3</i>      | 2.834±0.335  | 3.239±0.774  | 1.61E-03 |
| cg20395072 | 14 | 53258601  | <i>GNPNAT1</i>   | -2.188±0.28  | -1.843±0.661 | 1.62E-03 |
| cg18023724 | 4  | 164088493 | <i>NAF1</i>      | 2.284±0.36   | 1.857±0.815  | 1.62E-03 |
| cg07710481 | 13 | 88325384  | <i>SLITRK5</i>   | -4.225±0.471 | -3.715±0.954 | 1.62E-03 |
| cg27446233 | 12 | 48516484  | <i>PFKM</i>      | 0.815±0.326  | 1.249±0.84   | 1.62E-03 |
| cg00342530 | 9  | 130027020 | <i>GARNL3</i>    | 0.068±0.216  | 0.353±0.551  | 1.62E-03 |
| cg02763671 | 22 | 20103541  | <i>RANBP1</i>    | 2.208±0.353  | 1.768±0.844  | 1.62E-03 |
| cg26551843 | 14 | 75390007  | <i>RPS6KL1</i>   | -4.109±0.536 | -4.422±0.386 | 1.63E-03 |
| cg18493147 | 19 | 474445    | <i>ODF3L2</i>    | 1.98±0.403   | 2.407±0.797  | 1.63E-03 |
| cg17541922 | 11 | 86511813  | <i>PRSS23</i>    | -4.835±0.873 | -4.238±0.913 | 1.63E-03 |

|            |    |           |           |              |              |          |
|------------|----|-----------|-----------|--------------|--------------|----------|
| cg17272094 | 3  | 50317223  | LSMEM2    | 1.998±0.211  | 1.819±0.311  | 1.63E-03 |
| cg04985144 | 11 | 66488638  | SPTBN2    | 1.157±0.215  | 1.467±0.607  | 1.64E-03 |
| cg14481339 | 11 | 128737319 | KCNJ1     | 0.976±0.278  | 0.565±0.806  | 1.64E-03 |
| cg16536918 | 20 | 3065403   | AVP       | 1.282±0.244  | 1.032±0.464  | 1.65E-03 |
| cg01001286 | 15 | 81475638  | 0         | -1.295±0.291 | -1.734±0.865 | 1.65E-03 |
| cg14912575 | 14 | 70038236  | CCDC177   | 0.775±0.353  | 1.155±0.711  | 1.66E-03 |
| cg17714799 | 4  | 110625080 | CASP6     | -1.428±0.437 | -0.989±0.811 | 1.67E-03 |
| cg08377000 | 4  | 90033921  | TIGD2     | 1.219±0.354  | 1.557±0.614  | 1.67E-03 |
| cg12428416 | 13 | 20717597  | GJA3      | 2.222±0.304  | 1.827±0.765  | 1.67E-03 |
| cg24200059 | 17 | 80375975  | HEXDC     | -2.931±0.288 | -3.167±0.408 | 1.67E-03 |
| cg26764244 | 1  | 68299511  | GNG12     | -3.337±0.481 | -2.925±0.723 | 1.68E-03 |
| cg14694011 | 15 | 51631024  | CYP19A1   | 2.078±0.235  | 1.79±0.553   | 1.68E-03 |
| cg22747092 | 9  | 138987818 | NACC2     | -1.887±0.529 | -1.402±0.874 | 1.68E-03 |
| cg21486954 | 17 | 42385289  | RUNDC3A   | -4.88±0.504  | -4.451±0.753 | 1.68E-03 |
| cg02044879 | 10 | 74714935  | PLA2G12B  | 1.041±0.302  | 0.504±1.072  | 1.69E-03 |
| cg03055440 | 11 | 59950405  | MS4A6A    | 1.266±0.228  | 0.868±0.795  | 1.69E-03 |
| cg04164824 | 19 | 51628196  | SIGLEC9   | -0.482±0.243 | -0.098±0.759 | 1.69E-03 |
| cg08145625 | 4  | 118006405 | TRAM1L1   | -3.62±0.465  | -3.222±0.698 | 1.69E-03 |
| cg26198807 | 11 | 46957758  | C11orf49  | 0.353±0.201  | 0.05±0.599   | 1.70E-03 |
| cg18109798 | 12 | 20848473  | SLCO1C1   | 0.378±0.247  | -0.011±0.772 | 1.70E-03 |
| cg22392708 | 17 | 39093770  | KRT23     | -1.574±0.313 | -1.099±0.938 | 1.70E-03 |
| cg13053608 | 17 | 40345673  | GHDC      | 0.004±0.22   | 0.394±0.78   | 1.70E-03 |
| cg13368786 | 20 | 33463522  | ACSS2     | -1.869±0.42  | -2.18±0.508  | 1.70E-03 |
| cg10839521 | 7  | 133811911 | LRGUK     | -4.673±0.368 | -4.236±0.836 | 1.70E-03 |
| cg07540118 | 5  | 157002713 | ADAM19    | -4.505±0.6   | -3.864±1.206 | 1.71E-03 |
| cg19955257 | 19 | 699032    | 0         | 3.007±0.385  | 2.746±0.398  | 1.71E-03 |
| cg09892203 | 17 | 64961140  | CACNG4    | -5.976±0.848 | -5.248±1.281 | 1.71E-03 |
| cg21430666 | 1  | 228613073 | HIST3H3   | 5.29±0.31    | 5.059±0.381  | 1.71E-03 |
| cg19955521 | 10 | 1102667   | WDR37     | -2.704±0.276 | -2.515±0.292 | 1.71E-03 |
| cg10791260 | 9  | 117568588 | TNFSF15   | -3.539±0.314 | -3.868±0.615 | 1.71E-03 |
| cg26488636 | 11 | 746801    | TALDO1    | -4.386±0.376 | -4.71±0.572  | 1.72E-03 |
| cg20171451 | 20 | 23420109  | CSTL1     | 2.717±0.305  | 2.494±0.361  | 1.72E-03 |
| cg10840864 | 17 | 61903314  | PSMC5     | 2.101±0.27   | 2.389±0.542  | 1.72E-03 |
| cg12513481 | 17 | 46507830  | SKAP1     | -0.466±0.331 | -0.978±1.015 | 1.72E-03 |
| cg25097436 | 14 | 60336972  | RTN1      | -3.527±0.334 | -2.869±1.324 | 1.73E-03 |
| cg12973651 | 19 | 42894453  | CNFN      | -2.291±0.376 | -1.839±0.871 | 1.73E-03 |
| cg02968557 | 17 | 40275126  | HSPB9     | 2.522±0.302  | 1.98±1.084   | 1.73E-03 |
| cg18993334 | 1  | 156307348 | TSACC     | -2.912±0.376 | -3.204±0.494 | 1.74E-03 |
| cg09816471 | 16 | 11761860  | SNN       | -1.21±0.342  | -0.67±1.073  | 1.75E-03 |
| cg24441350 | 5  | 694015    | TPPP      | -4.5±0.638   | -3.91±1.07   | 1.75E-03 |
| cg24490338 | 1  | 154164054 | TPM3      | 2.135±0.259  | 1.743±0.775  | 1.75E-03 |
| cg21072025 | 19 | 47137863  | GNG8      | -3.357±0.347 | -3.866±1.006 | 1.75E-03 |
| cg14473016 | 22 | 35937495  | RASD2     | -4.308±0.481 | -3.948±0.595 | 1.75E-03 |
| cg07265310 | 12 | 53242922  | KRT78     | 0.032±0.147  | 0.274±0.482  | 1.76E-03 |
| cg21596317 | 5  | 102201545 | PAM       | -4.034±0.457 | -3.587±0.825 | 1.76E-03 |
| cg25301180 | 3  | 56502091  | ERC2      | -4.443±0.362 | -3.996±0.864 | 1.76E-03 |
| cg00796728 | 11 | 94276898  | FUT4      | -4.796±0.513 | -5.141±0.524 | 1.76E-03 |
| cg02704907 | 6  | 27116113  | HIST1H2BK | 1.266±0.268  | 0.912±0.691  | 1.77E-03 |
| cg07393322 | 22 | 43117318  | A4GALT    | -2.894±0.332 | -2.571±0.596 | 1.77E-03 |
| cg25995916 | 12 | 108155205 | PRDM4     | -3.92±0.164  | -4.03±0.167  | 1.77E-03 |
| cg21415080 | 11 | 65768416  | BANF1     | 0.284±0.152  | 0.161±0.213  | 1.77E-03 |
| cg04532229 | 2  | 103235411 | SLC9A2    | -5.383±0.537 | -4.742±1.234 | 1.77E-03 |
| cg19666391 | 4  | 71383307  | AMTN      | 1.708±0.319  | 1.438±0.462  | 1.77E-03 |
| cg22628873 | 17 | 4464400   | GGT6      | 0.57±0.393   | 1.126±1.095  | 1.78E-03 |
| cg21428681 | 8  | 23540856  | NKX3-1    | -2.625±0.263 | -2.114±1.031 | 1.78E-03 |
| cg08141989 | 17 | 7082562   | ASGR1     | 1.605±0.212  | 1.36±0.468   | 1.78E-03 |
| cg14876043 | 19 | 55458730  | NLRP7     | 2.494±0.266  | 2.166±0.636  | 1.78E-03 |
| cg05467458 | 19 | 33361032  | SLC7A9    | -0.434±0.193 | -0.071±0.731 | 1.79E-03 |
| cg00135393 | 4  | 155533661 | FGG       | -0.811±0.257 | -1.127±0.613 | 1.79E-03 |
| cg09595479 | 12 | 49689212  | PRPH      | -0.406±0.44  | -1.072±1.322 | 1.79E-03 |
| cg06461848 | 1  | 241846190 | WDR64     | -0.55±0.259  | -0.863±0.594 | 1.81E-03 |
| cg24256211 | 14 | 55035215  | SAMD4A    | -2.862±0.483 | -2.373±0.912 | 1.81E-03 |
| cg17044311 | 10 | 101542983 | ABCC2     | 1.451±0.339  | 0.998±0.888  | 1.81E-03 |
| cg11102782 | 19 | 18549136  | ISYNA1    | -2.997±0.499 | -2.49±0.946  | 1.81E-03 |
| cg11599505 | 20 | 36532096  | VSTM2L    | 3.211±0.444  | 2.588±1.227  | 1.81E-03 |
| cg05921699 | 19 | 42380725  | CD79A     | 1.345±0.255  | 1.007±0.662  | 1.81E-03 |
| cg06168324 | 2  | 161349637 | RBMS1     | -4.582±0.503 | -4.211±0.611 | 1.81E-03 |

|            |    |           |                  |              |              |          |
|------------|----|-----------|------------------|--------------|--------------|----------|
| cg24235633 | 16 | 29875177  | <i>CDIPT-AS1</i> | 2.451±0.35   | 1.983±0.918  | 1.82E-03 |
| cg02324920 | 10 | 105253152 | <i>NEURL</i>     | -0.166±0.173 | 0.213±0.769  | 1.82E-03 |
| cg03160309 | 1  | 186650080 | <i>PTGS2</i>     | -3.703±0.367 | -3.244±0.894 | 1.83E-03 |
| cg21039679 | 15 | 38989738  | <i>C15orf53</i>  | 1.607±0.309  | 1.263±0.657  | 1.83E-03 |
| cg11432797 | 16 | 29674487  | <i>SPN</i>       | 0.493±0.26   | 0.066±0.853  | 1.83E-03 |
| cg02622316 | 6  | 28367410  | <i>ZSCAN12</i>   | -4.954±0.408 | -4.015±1.915 | 1.83E-03 |
| cg06465194 | 11 | 120531034 | <i>GRIK4</i>     | -0.711±0.205 | -1.005±0.582 | 1.83E-03 |
| cg22171829 | 7  | 95225520  | <i>PDK4</i>      | -1.584±0.48  | -1.138±0.815 | 1.83E-03 |
| cg24364574 | 20 | 47443694  | <i>PREX1</i>     | -2.888±0.324 | -2.411±0.946 | 1.84E-03 |
| cg03569637 | 12 | 47609357  | <i>PCED1B</i>    | 0.424±0.4    | -0.03±0.869  | 1.84E-03 |
| cg24599739 | 22 | 24322308  | <i>GSTT2</i>     | -5.26±0.645  | -4.609±1.217 | 1.84E-03 |
| cg14089692 | 20 | 3662546   | <i>ADAM33</i>    | -3.536±0.392 | -3.109±0.812 | 1.84E-03 |
| cg12356261 | 1  | 156647259 | <i>NES</i>       | -4.062±0.315 | -3.822±0.404 | 1.85E-03 |
| cg10319505 | 9  | 85678251  | <i>RASEF</i>     | -4.262±0.829 | -3.624±1.079 | 1.85E-03 |
| cg13625403 | 11 | 120008510 | <i>TRIM29</i>    | 3.395±0.918  | 2.68±1.217   | 1.85E-03 |
| cg03251079 | 12 | 66218285  | <i>HMGA2</i>     | -2.918±0.652 | -2.373±0.96  | 1.85E-03 |
| cg01599709 | 5  | 139725677 | <i>HBEGF</i>     | -2.151±0.55  | -1.699±0.792 | 1.86E-03 |
| cg15037004 | 5  | 71803938  | <i>ZNF366</i>    | -0.747±0.244 | -0.386±0.715 | 1.86E-03 |
| cg16957313 | 5  | 172199661 | <i>DUSP1</i>     | -4.114±0.523 | -4.478±0.576 | 1.86E-03 |
| cg12499211 | 1  | 156786643 | <i>SH2D2A</i>    | -1.254±0.295 | -1.901±1.318 | 1.86E-03 |
| cg20401945 | 16 | 29912460  | <i>ASPHD1</i>    | -0.77±0.257  | -0.471±0.577 | 1.86E-03 |
| cg21623671 | 5  | 150536851 | <i>ANXA6</i>     | -4.176±0.488 | -3.528±1.274 | 1.88E-03 |
| cg26320696 | 11 | 12399109  | <i>PARVA</i>     | -2.861±0.659 | -2.334±0.912 | 1.88E-03 |
| cg24421410 | 6  | 32920220  | <i>HLA-DMA</i>   | -1.26±0.314  | -1.714±0.902 | 1.88E-03 |
| cg25843439 | 19 | 15852574  | <i>OR10H3</i>    | -0.299±0.32  | -0.669±0.714 | 1.88E-03 |
| cg14523284 | 5  | 131993614 | <i>IL13</i>      | 2.703±0.16   | 2.575±0.223  | 1.88E-03 |
| cg11715903 | 14 | 53417327  | <i>FERMT2</i>    | -6.26±0.658  | -5.681±1.042 | 1.89E-03 |
| cg07559730 | 19 | 53497048  | <i>ZNF702P</i>   | -4.156±0.384 | -3.706±0.869 | 1.89E-03 |
| cg27056559 | 10 | 131348484 | <i>MGMT</i>      | 3.076±0.194  | 2.792±0.565  | 1.89E-03 |
| cg10094277 | 12 | 91451887  | <i>KERA</i>      | 1.244±0.301  | 0.851±0.771  | 1.89E-03 |
| cg20427865 | 16 | 57406353  | <i>CX3CL1</i>    | -0.86±0.408  | -0.343±1.01  | 1.90E-03 |
| cg21643191 | 7  | 20685988  | <i>ABCB5</i>     | 1.914±0.294  | 1.565±0.678  | 1.90E-03 |
| cg19172575 | 8  | 11567721  | <i>GATA4</i>     | 0.61±0.322   | 0.274±0.638  | 1.90E-03 |
| cg00563845 | 3  | 58318305  | <i>PXK</i>       | -2.196±0.292 | -1.907±0.54  | 1.90E-03 |
| cg22192762 | 12 | 94542778  | <i>PLXNC1</i>    | -5.617±0.586 | -5.047±1.06  | 1.90E-03 |
| cg25133685 | 6  | 29013336  | <i>OR2W1</i>     | -1.24±0.439  | -1.677±0.817 | 1.90E-03 |
| cg06454084 | 19 | 47158242  | <i>DACT3</i>     | 0.641±0.269  | 0.969±0.64   | 1.91E-03 |
| cg12517944 | 17 | 33520939  | <i>SLC35G3</i>   | 4.608±0.31   | 4.365±0.416  | 1.91E-03 |
| cg24928161 | 17 | 7533115   | <i>SHBG</i>      | 2.476±0.439  | 2.145±0.557  | 1.91E-03 |
| cg21226234 | 8  | 145741991 | <i>RECQL4</i>    | 2.959±0.26   | 2.725±0.425  | 1.91E-03 |
| cg25996835 | 15 | 72978165  | <i>HIGD2B</i>    | -3.652±0.326 | -3.917±0.462 | 1.93E-03 |
| cg20884362 | 21 | 46358702  | <i>C21orf67</i>  | 0.908±0.251  | 0.573±0.66   | 1.93E-03 |
| cg25182621 | 3  | 184097440 | <i>CHRD</i>      | 0.574±0.253  | 0.925±0.695  | 1.94E-03 |
| cg23141855 | 7  | 93519892  | <i>TFPI2</i>     | -3.912±0.361 | -3.324±1.182 | 1.94E-03 |
| cg12351042 | 6  | 27879749  | <i>OR2B2</i>     | 1.351±0.235  | 1.09±0.501   | 1.94E-03 |
| cg16017492 | 17 | 74022575  | <i>EVPL</i>      | 2.034±0.275  | 1.574±0.928  | 1.95E-03 |
| cg08321346 | 2  | 241496983 | <i>ANKMY1</i>    | -1.001±0.401 | -0.589±0.777 | 1.95E-03 |
| cg06459066 | 14 | 64855287  | <i>MTHFD1</i>    | -4.591±0.304 | -4.78±0.268  | 1.95E-03 |
| cg09646392 | 13 | 108921052 | <i>TNFSF13B</i>  | -0.275±0.27  | -0.629±0.698 | 1.95E-03 |
| cg07027513 | 18 | 29265840  | <i>B4GALT6</i>   | -3.709±0.313 | -3.15±1.133  | 1.96E-03 |
| cg03732056 | 8  | 21771059  | <i>DOK2</i>      | -1.428±0.354 | -1.824±0.764 | 1.97E-03 |
| cg01399317 | 8  | 144810339 | <i>FAM83H</i>    | 1.101±0.348  | 1.434±0.62   | 1.97E-03 |
| cg21626086 | 6  | 35704928  | <i>ARMC12</i>    | 2.391±0.158  | 2.238±0.286  | 1.97E-03 |
| cg22563697 | 8  | 145722190 | <i>PPP1R16A</i>  | 2.596±0.28   | 2.323±0.51   | 1.98E-03 |
| cg19237753 | 20 | 1876215   | <i>SIRPA</i>     | -3.782±0.302 | -3.187±1.212 | 1.98E-03 |
| cg19781053 | 15 | 30114912  | <i>TJP1</i>      | -3.747±0.559 | -3.352±0.64  | 1.98E-03 |
| cg03679734 | 15 | 43885090  | <i>CKMT1B</i>    | -2.361±0.323 | -2.081±0.504 | 1.98E-03 |
| cg03447931 | 6  | 7726645   | <i>BMP6</i>      | -5.18±0.544  | -4.305±1.761 | 1.98E-03 |
| cg16944093 | 2  | 128422120 | <i>LIMS2</i>     | -1.085±0.296 | -0.757±0.631 | 1.98E-03 |
| cg16378421 | 3  | 183736171 | <i>ABCC5</i>     | -4.701±0.477 | -4.329±0.641 | 1.98E-03 |
| cg19553721 | 17 | 18429951  | <i>FAM106A</i>   | 1.492±0.224  | 1.279±0.396  | 1.99E-03 |
| cg08831348 | 19 | 46142212  | <i>EML2</i>      | -2.191±0.369 | -2.449±0.413 | 1.99E-03 |
| cg01545079 | 14 | 24541377  | <i>CPNE6</i>     | 1.828±0.235  | 1.35±0.976   | 1.99E-03 |
| cg00063144 | 17 | 39554055  | <i>KRT31</i>     | 2.448±0.203  | 2.298±0.251  | 2.00E-03 |
| cg18877514 | 12 | 133262879 | <i>POLE</i>      | 2.801±0.347  | 2.383±0.816  | 2.00E-03 |
| cg25141720 | 9  | 89561826  | <i>GAS1</i>      | -3.567±0.304 | -2.922±1.32  | 2.00E-03 |
| cg14809191 | 6  | 1311825   | <i>FOXQ1</i>     | -4.217±0.526 | -3.76±0.825  | 2.00E-03 |

|            |    |           |               |              |              |          |
|------------|----|-----------|---------------|--------------|--------------|----------|
| cg00567749 | 5  | 82767908  | VCAN          | -3.938±0.404 | -3.478±0.89  | 2.00E-03 |
| cg12497564 | 3  | 139258295 | RBP1          | -3.061±0.77  | -2.286±1.464 | 2.01E-03 |
| cg12072973 | 1  | 150121727 | PLEKHO1       | -5.824±0.664 | -4.952±1.726 | 2.01E-03 |
| cg24678429 | 10 | 129705785 | PTPRE         | -5.104±0.86  | -4.426±1.176 | 2.01E-03 |
| cg23591853 | 2  | 27712996  | IFT172        | -1.992±0.307 | -2.276±0.524 | 2.01E-03 |
| cg15443822 | 17 | 3867014   | ATP2A3        | -4.007±0.424 | -3.221±1.601 | 2.02E-03 |
| cg00044245 | 6  | 94128889  | EPHA7         | -3.453±0.322 | -2.947±1.019 | 2.02E-03 |
| cg13675849 | 7  | 142631215 | TRPV5         | 2.274±0.252  | 1.792±0.984  | 2.02E-03 |
| cg05508558 | 1  | 207627372 | CR2           | -2.242±0.318 | -2.582±0.651 | 2.02E-03 |
| cg16608348 | 1  | 214724481 | PTPN14        | -4.684±0.719 | -4.112±0.996 | 2.03E-03 |
| cg24173049 | 17 | 6939795   | SLC16A13      | -4.706±0.471 | -4.99±0.388  | 2.03E-03 |
| cg16005443 | 19 | 54727139  | LILRB3        | -2.095±0.422 | -1.687±0.763 | 2.03E-03 |
| cg06878726 | 12 | 114404035 | RBM19         | -5.196±0.392 | -4.917±0.457 | 2.03E-03 |
| cg22173227 | 6  | 31948523  | C4A           | 2.895±0.183  | 2.755±0.237  | 2.03E-03 |
| cg02688643 | 4  | 140585523 | MGST2         | 2.718±0.262  | 2.395±0.635  | 2.04E-03 |
| cg27457941 | 3  | 139258754 | RBP1          | -4.481±0.368 | -3.968±1.025 | 2.04E-03 |
| cg04281204 | 10 | 115612802 | DCLRE1A       | 1.136±0.286  | 0.8±0.655    | 2.04E-03 |
| cg05221264 | 1  | 15783513  | CELA2A        | 3.129±0.329  | 2.858±0.479  | 2.05E-03 |
| cg27094076 | 7  | 50132541  | ZBPB          | -3.412±0.397 | -2.935±0.936 | 2.05E-03 |
| cg07823935 | 2  | 183902842 | NCKAP1        | -4.825±0.749 | -4.218±1.071 | 2.05E-03 |
| cg05795313 | 12 | 48745136  | ZNF641        | -3.089±0.43  | -2.726±0.649 | 2.06E-03 |
| cg23751724 | 20 | 13976403  | MACROD2       | -3.308±0.61  | -2.775±0.968 | 2.06E-03 |
| cg26041297 | 11 | 62009811  | SCGB1D2       | -0.327±0.245 | -0.598±0.522 | 2.06E-03 |
| cg16547450 | 13 | 21141711  | IFT88         | -4.559±0.516 | -4.209±0.553 | 2.07E-03 |
| cg01861509 | 10 | 73849626  | SPOCK2        | 1.314±0.426  | 1.682±0.664  | 2.07E-03 |
| cg00412805 | 3  | 42726970  | KLHL40        | 3.115±0.354  | 3.476±0.684  | 2.07E-03 |
| cg14594876 | 20 | 32031951  | SNTA1         | -3.251±0.456 | -3.583±0.552 | 2.08E-03 |
| cg10073723 | 7  | 33944213  | BMPER         | -5.602±0.511 | -5.021±1.129 | 2.08E-03 |
| cg21264055 | 6  | 30523242  | PRR3          | -2.768±0.405 | -2.195±1.147 | 2.09E-03 |
| cg19591206 | 3  | 133748809 | SLCO2A1       | -4.867±0.917 | -4.101±1.37  | 2.09E-03 |
| cg26571739 | 19 | 6772688   | VAV1          | -0.561±0.21  | -0.889±0.661 | 2.09E-03 |
| cg09231514 | 19 | 5681323   | C19orf70      | -3.611±0.362 | -3.163±0.881 | 2.09E-03 |
| cg17625032 | 16 | 57054740  | NLRC5         | 0.535±0.205  | 0.806±0.538  | 2.09E-03 |
| cg18746357 | 11 | 65429465  | RELA          | 0.389±0.191  | 0.751±0.741  | 2.09E-03 |
| cg16927606 | 19 | 36233324  | IGFLR1        | 1.085±0.389  | 0.68±0.773   | 2.09E-03 |
| cg12791554 | 12 | 11151622  | TAS2R20       | 2.697±0.295  | 2.501±0.302  | 2.09E-03 |
| cg09034836 | 22 | 22986350  | POM121L1P     | 3.34±0.351   | 3.122±0.314  | 2.09E-03 |
| cg14267151 | 6  | 8066098   | BLOC1S5-TXND5 | 0.755±0.299  | 0.352±0.805  | 2.10E-03 |
| cg24362016 | 19 | 12406154  | ZNF44         | -1.907±0.332 | -1.548±0.691 | 2.10E-03 |
| cg13976438 | 12 | 88423076  | C12orf50      | 2.201±0.285  | 1.947±0.465  | 2.10E-03 |
| cg17777592 | 13 | 49975418  | CAB39L        | -0.553±0.31  | -0.904±0.682 | 2.10E-03 |
| cg08496998 | 7  | 5822206   | RAB216        | 2.346±0.303  | 2.557±0.341  | 2.12E-03 |
| cg26702254 | 7  | 119912586 | KCND2         | -4.545±0.497 | -3.908±1.263 | 2.12E-03 |
| cg17812431 | 16 | 20364284  | UMOD          | 0.705±0.386  | 0.214±0.971  | 2.12E-03 |
| cg15698196 | 19 | 39236354  | CAPN12        | 0.916±0.237  | 0.61±0.608   | 2.12E-03 |
| cg06517798 | 1  | 160121283 | ATP1A4        | 2.721±0.194  | 2.496±0.44   | 2.13E-03 |
| cg02507952 | 14 | 106390641 | KIAA0125      | 0.189±0.251  | -0.094±0.552 | 2.14E-03 |
| cg22983092 | 17 | 38911538  | KRT25         | 2.51±0.311   | 2.005±1.026  | 2.14E-03 |
| cg17805404 | 12 | 6930624   | GPR162        | -4.099±0.33  | -3.693±0.802 | 2.14E-03 |
| cg19923326 | 11 | 2828778   | KCNQ1         | 0.074±0.258  | 0.337±0.502  | 2.14E-03 |
| cg12099032 | 7  | 37888745  | NME8          | 5.295±0.377  | 4.892±0.776  | 2.14E-03 |
| cg16728114 | 1  | 156697793 | ISG20L2       | -4.191±0.378 | -4.465±0.457 | 2.14E-03 |
| cg01127428 | 12 | 102133040 | SYCP3         | 3.883±0.248  | 3.703±0.3    | 2.14E-03 |
| cg23093496 | 16 | 29757323  | C16orf54      | 0.598±0.355  | 0.207±0.759  | 2.15E-03 |
| cg26743024 | 17 | 64960282  | CACNG4        | -1.008±0.218 | -0.722±0.57  | 2.15E-03 |
| cg18440474 | 2  | 175869653 | CHN1          | -4.877±0.423 | -4.417±0.888 | 2.15E-03 |
| cg23352747 | 1  | 21835436  | ALPL          | -3.818±0.367 | -3.498±0.585 | 2.15E-03 |
| cg11521965 | 7  | 137028604 | PTN           | -2.435±0.296 | -1.984±0.913 | 2.15E-03 |
| cg21172540 | 1  | 32827840  | FAM229A       | -4.078±0.838 | -3.412±1.17  | 2.15E-03 |
| cg08936952 | 14 | 74026160  | HEATR4        | 2.695±0.208  | 2.535±0.277  | 2.16E-03 |
| cg03835158 | 8  | 52773607  | PCMTD1        | 3.342±0.244  | 3.511±0.274  | 2.17E-03 |
| cg25020204 | 9  | 136500234 | DBH           | 0.973±0.184  | 0.738±0.466  | 2.17E-03 |
| cg11368509 | 19 | 55851365  | SUV420H2      | -3.206±0.289 | -2.973±0.412 | 2.19E-03 |
| cg16248277 | 10 | 103536063 | FGF8          | -1.693±0.214 | -1.459±0.454 | 2.19E-03 |
| cg10453758 | 3  | 132380190 | UBA5          | -1.362±0.236 | -1.627±0.516 | 2.19E-03 |
| cg12638745 | 21 | 40816464  | LCA5L         | -1.508±0.373 | -1.104±0.782 | 2.19E-03 |
| cg10570177 | 9  | 136324586 | CACFD1        | -4.049±0.328 | -3.756±0.539 | 2.19E-03 |

|             |    |           |          |              |              |          |
|-------------|----|-----------|----------|--------------|--------------|----------|
| cg22521310  | 2  | 64881850  | SERTAD2  | -4.091±0.513 | -3.716±0.63  | 2.19E-03 |
| cg03430998  | 4  | 38807057  | TLR1     | -0.137±0.279 | -0.466±0.647 | 2.20E-03 |
| cg24901474  | 1  | 163173040 | RGS5     | -0.816±0.379 | -0.366±0.886 | 2.20E-03 |
| cg14019317  | 1  | 214161306 | PROX1    | -4.148±0.378 | -3.622±1.058 | 2.20E-03 |
| cg09424896  | 19 | 16284351  | CIB3     | 0.466±0.234  | 0.194±0.534  | 2.20E-03 |
| cg17993949  | 11 | 64357910  | SLC22A12 | 2.546±0.193  | 2.327±0.429  | 2.21E-03 |
| cg09328024  | 1  | 206808174 | DYRK3    | -2.915±0.299 | -2.386±1.084 | 2.21E-03 |
| cg15057581  | 20 | 1875084   | SIRPA    | -3.77±0.714  | -3.034±1.412 | 2.21E-03 |
| cg24824266  | 15 | 91643655  | SV2B     | -5.386±0.342 | -4.822±1.151 | 2.21E-03 |
| cg23082877  | 19 | 49243427  | RASIP1   | -0.09±0.253  | 0.256±0.695  | 2.22E-03 |
| cg261111030 | 17 | 37856378  | ERBB2    | -3.247±0.613 | -2.793±0.772 | 2.22E-03 |
| cg01044662  | 2  | 75938360  | GCFC2    | -3.441±0.409 | -3.111±0.585 | 2.23E-03 |
| cg19562969  | 20 | 35233582  | C20orf24 | 0.184±0.279  | -0.222±0.819 | 2.23E-03 |
| cg10523671  | 3  | 121612956 | SLC15A2  | 0.349±0.389  | 0.952±1.225  | 2.24E-03 |
| cg13407883  | 19 | 51627843  | SIGLEC9  | 1.599±0.205  | 1.264±0.685  | 2.25E-03 |
| cg22730830  | 16 | 2867434   | PRSS21   | 0.779±0.465  | 1.217±0.823  | 2.25E-03 |
| cg00314943  | 2  | 233270750 | ALPPL2   | 2.139±0.199  | 1.982±0.276  | 2.25E-03 |
| cg15731815  | 1  | 6269260   | RNF207   | -0.425±0.335 | 0.064±0.991  | 2.25E-03 |
| cg24841244  | 11 | 118213330 | CD3D     | 1.527±0.359  | 1.151±0.726  | 2.26E-03 |
| cg19478478  | 6  | 123957927 | TRDN     | 1.135±0.36   | 0.795±0.639  | 2.27E-03 |
| cg20888386  | 2  | 219858260 | CRYBA2   | -4.704±0.46  | -4.145±1.11  | 2.28E-03 |
| cg00186954  | 11 | 8933980   | AKIP1    | 0.738±0.328  | 1.052±0.595  | 2.28E-03 |
| cg02407785  | 13 | 67804285  | PCDH9    | -5.193±0.454 | -4.818±0.675 | 2.29E-03 |
| cg12707353  | 4  | 8440629   | ACOX3    | 0.659±0.298  | 0.922±0.487  | 2.29E-03 |
| cg14173969  | 17 | 72541932  | CD300C   | 0.283±0.268  | -0.132±0.847 | 2.30E-03 |
| cg06481786  | 17 | 34257936  | RDM1     | -2.955±0.368 | -3.19±0.358  | 2.30E-03 |
| cg08013810  | 20 | 34389239  | PHF20    | 1.294±0.317  | 0.983±0.593  | 2.30E-03 |
| cg15120497  | 3  | 129692899 | TRH      | 2.892±0.186  | 2.558±0.69   | 2.30E-03 |
| cg09553358  | 11 | 790184    | CEND1    | -3.912±0.364 | -3.405±1.022 | 2.30E-03 |
| cg14426682  | 15 | 79164100  | MORF4L1  | 2.327±0.255  | 2.018±0.615  | 2.31E-03 |
| cg22101098  | 6  | 25830789  | SLC17A1  | 2.085±0.252  | 1.726±0.726  | 2.32E-03 |
| cg20495040  | 1  | 155107961 | SLC50A1  | -3.012±0.459 | -3.332±0.527 | 2.32E-03 |
| cg01947224  | 19 | 58089885  | ZNF416   | -4.244±0.32  | -4.48±0.403  | 2.32E-03 |
| cg03460682  | 2  | 219646316 | CYP27A1  | -3.765±0.54  | -3.293±0.872 | 2.32E-03 |
| cg15278948  | 2  | 220071103 | ZFAND2B  | -4.689±0.332 | -4.903±0.328 | 2.33E-03 |
| cg12845808  | 5  | 141338604 | PCDH12   | -0.002±0.207 | 0.326±0.672  | 2.33E-03 |
| cg09863772  | 2  | 11886400  | LPIN1    | -2.497±0.189 | -2.156±0.704 | 2.34E-03 |
| cg01367992  | 1  | 160766535 | LY9      | 0.993±0.365  | 0.491±1.013  | 2.35E-03 |
| cg00239419  | 17 | 57969186  | TUBD1    | 1.994±0.268  | 1.72±0.528   | 2.35E-03 |
| cg06508445  | 5  | 121414088 | LOX      | -5.014±0.641 | -4.503±0.909 | 2.36E-03 |
| cg27508002  | 13 | 37454023  | SMAD9    | 1.126±0.237  | 0.767±0.732  | 2.37E-03 |
| cg02947253  | 1  | 112046700 | ADORA3   | 2.201±0.375  | 1.808±0.763  | 2.37E-03 |
| cg10929387  | 3  | 52864659  | ITIH4    | 2.079±0.434  | 1.61±0.916   | 2.37E-03 |
| cg19224278  | 15 | 101419017 | ALDH1A3  | -1.609±0.346 | -1.159±0.904 | 2.37E-03 |
| cg25415932  | 3  | 9791051   | OGG1     | -1.965±0.455 | -1.561±0.75  | 2.38E-03 |
| cg19663795  | 16 | 30393854  | 42614    | -0.308±0.357 | -0.699±0.766 | 2.38E-03 |
| cg22873892  | 15 | 49447651  | COPS2    | -3.963±0.395 | -3.716±0.368 | 2.38E-03 |
| cg26661481  | 11 | 117855870 | IL10RA   | 2.036±0.287  | 1.595±0.902  | 2.39E-03 |
| cg24239808  | 3  | 15641908  | HACL1    | 1.833±0.177  | 2.061±0.457  | 2.39E-03 |
| cg18902090  | 5  | 140306249 | PCDHAC1  | -2.782±0.655 | -2.279±0.881 | 2.39E-03 |
| cg24820508  | 3  | 138048370 | NME9     | -3.822±0.192 | -3.667±0.277 | 2.39E-03 |
| cg16540704  | 7  | 117067416 | ASZ1     | 2.664±0.284  | 2.329±0.663  | 2.39E-03 |
| cg02941816  | 10 | 131265696 | MGMT     | -3.839±0.378 | -4.256±0.817 | 2.39E-03 |
| cg03573747  | 3  | 186560617 | ADIPOQ   | 1.649±0.213  | 1.342±0.626  | 2.40E-03 |
| cg04502814  | 5  | 42811952  | SEPP1    | -3.022±0.412 | -2.62±0.77   | 2.40E-03 |
| cg12506971  | 4  | 171011264 | AADAT    | -3.541±0.785 | -2.935±1.063 | 2.40E-03 |
| cg14550066  | 19 | 55417500  | NCR1     | -0.244±0.463 | 0.136±0.684  | 2.40E-03 |
| cg22297305  | 22 | 18923471  | PRODH    | -4.755±0.5   | -4.367±0.683 | 2.40E-03 |
| cg17412560  | 2  | 95963403  | KCNIP3   | -0.587±0.254 | -0.951±0.739 | 2.40E-03 |
| cg03964111  | 7  | 150498493 | TMEM176B | -0.761±0.37  | -1.19±0.85   | 2.41E-03 |
| cg15322932  | 11 | 67777682  | ALDH3B1  | -3.641±0.318 | -3.361±0.519 | 2.41E-03 |
| cg09537031  | 8  | 19171706  | SH2D4A   | -4.605±0.564 | -4.173±0.757 | 2.42E-03 |
| cg18587271  | 16 | 46917496  | GPT2     | -1.987±0.2   | -2.178±0.365 | 2.43E-03 |
| cg18190433  | 17 | 10573397  | 0        | -0.069±0.274 | 0.182±0.475  | 2.43E-03 |
| cg05936800  | 1  | 173020492 | TNFSF18  | 0.666±0.362  | 1.04±0.717   | 2.44E-03 |
| cg18302652  | 4  | 74606192  | IL8      | -2.514±0.45  | -2.871±0.638 | 2.44E-03 |
| cg21351994  | 2  | 73145006  | EMX1     | -4.175±0.591 | -3.312±1.762 | 2.44E-03 |

|            |    |           |                     |              |              |          |
|------------|----|-----------|---------------------|--------------|--------------|----------|
| cg16792632 | 14 | 64761208  | <i>ESR2</i>         | -5.186±0.464 | -5.68±0.965  | 2.45E-03 |
| cg07657776 | 12 | 109914065 | <i>KCTD10</i>       | 0.785±0.222  | 1.075±0.585  | 2.45E-03 |
| cg23756272 | 18 | 60904418  | <i>BCL2</i>         | 1.865±0.259  | 1.528±0.68   | 2.45E-03 |
| cg22037121 | 2  | 210635618 | <i>UNC80</i>        | 0.909±0.243  | 0.529±0.78   | 2.45E-03 |
| cg12627583 | 2  | 201450731 | <i>AOX1</i>         | -4.216±0.354 | -3.788±0.855 | 2.46E-03 |
| cg05845178 | 3  | 9957531   | <i>IL17RC</i>       | -5.305±0.675 | -4.462±1.693 | 2.46E-03 |
| cg08896945 | 11 | 15095068  | <i>CALCB</i>        | -2.996±0.345 | -2.514±0.979 | 2.46E-03 |
| cg21237591 | 11 | 2162510   | <i>IGF2</i>         | -2.125±0.319 | -1.623±1.034 | 2.47E-03 |
| cg20398120 | 2  | 219696690 | <i>PRKAG3</i>       | 2.833±0.191  | 2.576±0.519  | 2.47E-03 |
| cg22506453 | 17 | 39122753  | <i>KRT39</i>        | 1.206±0.278  | 1.499±0.572  | 2.47E-03 |
| cg16745604 | 2  | 202047459 | <i>CASP10</i>       | -0.55±0.276  | -0.916±0.742 | 2.47E-03 |
| cg14383135 | 2  | 101436923 | <i>NPAS2</i>        | -3.744±1.157 | -2.924±1.377 | 2.47E-03 |
| cg10922280 | 16 | 68034227  | <i>DPEP2</i>        | -0.675±0.228 | -0.38±0.596  | 2.48E-03 |
| cg14576824 | 1  | 213224402 | <i>RPS6KC1</i>      | -1.341±0.43  | -1.759±0.8   | 2.48E-03 |
| cg20993403 | 20 | 34700329  | <i>EPB41L1</i>      | 0.483±0.263  | 0.124±0.728  | 2.48E-03 |
| cg26018901 | 4  | 47840011  | <i>CORIN</i>        | -2.351±0.314 | -2.77±0.849  | 2.48E-03 |
| cg15603885 | 8  | 107782373 | <i>ABRA</i>         | 4.512±0.407  | 4.167±0.633  | 2.48E-03 |
| cg11897314 | 5  | 119799832 | <i>PRR16</i>        | -4.069±0.49  | -3.377±1.411 | 2.48E-03 |
| cg19427610 | 12 | 65515031  | <i>WIF1</i>         | -3.181±0.533 | -2.7±0.905   | 2.49E-03 |
| cg06747888 | 2  | 162271859 | <i>TBR1</i>         | -2.63±0.312  | -2.942±0.603 | 2.49E-03 |
| cg10215079 | 12 | 57410788  | <i>TAC3</i>         | 2.207±0.368  | 1.975±0.351  | 2.49E-03 |
| cg15896447 | 14 | 24683287  | <i>CHMP4A</i>       | 2.712±0.217  | 2.589±0.159  | 2.49E-03 |
| cg18443378 | 4  | 176986950 | <i>WDR17</i>        | -4.754±0.511 | -3.89±1.788  | 2.49E-03 |
| cg13326338 | 5  | 138463619 | <i>SIL1</i>         | 4.027±0.293  | 3.814±0.365  | 2.50E-03 |
| cg07064406 | 20 | 43513064  | <i>YWHAB</i>        | 2.984±0.171  | 2.842±0.26   | 2.50E-03 |
| cg24739326 | 19 | 34175354  | <i>CHST8</i>        | -2.803±0.348 | -2.463±0.652 | 2.50E-03 |
| cg25655096 | 12 | 6745292   | <i>LPAR5</i>        | -0.62±0.268  | -0.985±0.742 | 2.51E-03 |
| cg18006568 | 2  | 71205891  | <i>ANKRD53</i>      | -1.397±0.488 | -0.887±0.996 | 2.51E-03 |
| cg14540297 | 1  | 87597473  | <i>LOC339524</i>    | -3.952±0.302 | -4.154±0.324 | 2.53E-03 |
| cg09748960 | 6  | 32374926  | <i>BTNL2</i>        | 0.216±0.318  | -0.197±0.837 | 2.53E-03 |
| cg15830940 | 2  | 217278069 | <i>SMARCAL1</i>     | -0.027±0.284 | 0.306±0.664  | 2.53E-03 |
| cg05020203 | 2  | 242968829 | <i>0</i>            | 1.268±0.125  | 1.133±0.264  | 2.53E-03 |
| cg20637307 | 2  | 213403960 | <i>ERBB4</i>        | -4.063±0.744 | -3.34±1.389  | 2.54E-03 |
| cg19954000 | 5  | 142065671 | <i>FGF1</i>         | -0.321±0.391 | 0.081±0.784  | 2.55E-03 |
| cg16334795 | 21 | 42538894  | <i>MIR3197</i>      | -1.474±0.299 | -1.046±0.876 | 2.55E-03 |
| cg08972170 | 7  | 30185776  | <i>C7orf41</i>      | 1.907±0.273  | 2.159±0.478  | 2.57E-03 |
| cg05058973 | 7  | 31002599  | <i>GHRHR</i>        | 0.776±0.352  | 0.481±0.543  | 2.58E-03 |
| cg22799321 | 7  | 93519621  | <i>TFPI2</i>        | -4.255±0.37  | -3.709±1.121 | 2.58E-03 |
| cg10503234 | 19 | 676739    | <i>FSTL3</i>        | -1.901±0.439 | -1.523±0.702 | 2.58E-03 |
| cg13086467 | 19 | 12779373  | <i>WDR83OS</i>      | 1.78±0.209   | 2.052±0.553  | 2.58E-03 |
| cg00877887 | 15 | 45406654  | <i>DUOXA2</i>       | -4.231±0.371 | -3.789±0.885 | 2.59E-03 |
| cg23750142 | 8  | 61193876  | <i>CA8</i>          | -5.359±0.596 | -4.523±1.711 | 2.59E-03 |
| cg23833896 | 8  | 1711046   | <i>CLN8</i>         | -3.598±0.605 | -3.175±0.709 | 2.59E-03 |
| cg14386691 | 14 | 23479657  | <i>C14orf93</i>     | -2.833±0.279 | -3.069±0.437 | 2.59E-03 |
| cg21922731 | 12 | 57157130  | <i>HSD17B6</i>      | -1.772±0.317 | -1.43±0.674  | 2.60E-03 |
| cg26117431 | 1  | 100643544 | <i>LRRC39</i>       | 1.969±0.222  | 2.145±0.317  | 2.60E-03 |
| cg07950803 | 1  | 158223934 | <i>CD1A</i>         | 1.312±0.33   | 0.837±0.977  | 2.60E-03 |
| cg11808757 | 22 | 50683907  | <i>TUBGCP6</i>      | -2.01±0.156  | -2.169±0.31  | 2.60E-03 |
| cg15983520 | 8  | 145729106 | <i>GPT</i>          | 1.222±0.202  | 0.89±0.688   | 2.60E-03 |
| cg14458615 | 3  | 118864952 | <i>C3orf30</i>      | 1.375±0.371  | 0.849±1.078  | 2.60E-03 |
| cg08538752 | 21 | 10990890  | <i>TPTE</i>         | 0.033±0.207  | 0.217±0.345  | 2.60E-03 |
| cg11262815 | 17 | 48638703  | <i>CACNA1G</i>      | -4.256±0.29  | -3.535±1.525 | 2.61E-03 |
| cg27650434 | 1  | 40368189  | <i>MYCL</i>         | -3.624±0.257 | -3.83±0.372  | 2.61E-03 |
| cg00518911 | 7  | 27221304  | <i>HOXA10-HOXA9</i> | 0.32±0.324   | 0.668±0.684  | 2.62E-03 |
| cg27238470 | 1  | 41950325  | <i>EDN2</i>         | 0.355±0.248  | 0.081±0.544  | 2.62E-03 |
| cg05600174 | 9  | 77704537  | <i>OSTF1</i>        | -3.61±0.357  | -3.267±0.662 | 2.62E-03 |
| cg26239233 | 16 | 10970801  | <i>CIITA</i>        | -1.338±0.405 | -1.894±1.137 | 2.64E-03 |
| cg01468868 | 22 | 30642653  | <i>LIF</i>          | -4.499±0.341 | -3.798±1.473 | 2.64E-03 |
| cg20295671 | 22 | 22090486  | <i>YPEL1</i>        | -5.785±0.868 | -4.988±1.517 | 2.64E-03 |
| cg15517609 | 19 | 38924045  | <i>RYR1</i>         | -1.711±0.393 | -1.279±0.856 | 2.64E-03 |
| cg19467928 | 16 | 16317435  | <i>ABCC6</i>        | -5.235±0.719 | -4.713±0.899 | 2.65E-03 |
| cg17050972 | 6  | 27782197  | <i>HIST1H2AJ</i>    | -2.869±0.358 | -3.44±1.186  | 2.65E-03 |
| cg06041363 | 22 | 46663418  | <i>TTC38</i>        | -2.4±0.322   | -2.121±0.523 | 2.65E-03 |
| cg08996521 | 3  | 50649994  | <i>MAPKAPK3</i>     | -4.281±0.346 | -3.979±0.566 | 2.66E-03 |
| cg01536400 | 9  | 124923283 | <i>MORN5</i>        | 2.765±0.314  | 2.483±0.533  | 2.68E-03 |
| cg26534508 | 1  | 236306311 | <i>GPR137B</i>      | -4.885±0.398 | -4.434±0.902 | 2.68E-03 |
| cg08820801 | 19 | 39465821  | <i>FBXO17</i>       | -0.68±0.391  | -0.226±0.909 | 2.68E-03 |

|            |    |           |          |              |              |          |
|------------|----|-----------|----------|--------------|--------------|----------|
| cg07749074 | 3  | 186383386 | HRG      | 0.593±0.28   | 0.819±0.413  | 2.69E-03 |
| cg19008649 | 2  | 217560292 | IGFBP5   | -3.301±0.36  | -2.973±0.623 | 2.69E-03 |
| cg02111587 | 2  | 75426512  | TACR1    | -3.626±0.297 | -3.136±1.02  | 2.69E-03 |
| cg21481775 | 8  | 23539627  | NKX3-1   | -3.428±0.352 | -3.088±0.658 | 2.69E-03 |
| cg07719512 | 2  | 219246576 | SLC11A1  | 0.771±0.233  | 0.521±0.494  | 2.70E-03 |
| cg25683904 | 10 | 51622198  | TIMM23   | -0.868±0.347 | -1.139±0.488 | 2.70E-03 |
| cg18542098 | 19 | 36499326  | SYNE4    | 0.965±0.255  | 0.636±0.67   | 2.70E-03 |
| cg21388029 | 2  | 102003306 | CREG2    | -4.144±0.458 | -3.602±1.091 | 2.70E-03 |
| cg12529801 | 16 | 9184705   | C16orf72 | -5.256±0.392 | -5.534±0.474 | 2.71E-03 |
| cg22084611 | 20 | 46414934  | SULF2    | -1.883±0.279 | -1.488±0.814 | 2.71E-03 |
| cg05348123 | 4  | 174321584 | SCRG1    | 2.04±0.268   | 1.802±0.449  | 2.71E-03 |
| cg17663577 | 17 | 7185232   | SLC2A4   | -5.845±0.62  | -5.406±0.747 | 2.71E-03 |
| cg25422943 | 13 | 67804733  | PCDH9    | -5.295±0.787 | -4.563±1.402 | 2.72E-03 |
| cg24530795 | 12 | 111807189 | FAM109A  | -4.067±0.462 | -3.705±0.653 | 2.72E-03 |
| cg05788437 | 3  | 197476880 | FYTTD1   | -5.325±0.417 | -5.016±0.543 | 2.72E-03 |
| cg17561435 | 7  | 33944927  | BMPER    | -3.858±0.373 | -3.294±1.167 | 2.73E-03 |
| cg17823175 | 19 | 828170    | AZU1     | 1.696±0.324  | 1.358±0.667  | 2.73E-03 |
| cg20333306 | 13 | 49039678  | RB1      | 3.395±0.343  | 3.178±0.336  | 2.73E-03 |
| cg25729716 | 17 | 62010607  | CD79B    | 2.483±0.178  | 2.297±0.367  | 2.73E-03 |
| cg23904249 | 11 | 60608951  | CCDC86   | 0.94±0.395   | 1.348±0.801  | 2.73E-03 |
| cg14204735 | 17 | 61524304  | CYB561   | -3.753±0.449 | -4.23±0.945  | 2.74E-03 |
| cg02043477 | 19 | 41357152  | CYP2A6   | 1.888±0.149  | 1.747±0.27   | 2.74E-03 |
| cg07376232 | 11 | 118084920 | AMICA1   | 0.454±0.295  | -0.018±0.981 | 2.74E-03 |
| cg04180953 | 18 | 28743074  | DSC1     | 0.888±0.205  | 0.638±0.508  | 2.75E-03 |
| cg12820608 | 12 | 53626390  | RARG     | -4.478±0.22  | -4.657±0.328 | 2.75E-03 |
| cg05761971 | 2  | 38177677  | RMDN2    | 1.22±0.338   | 0.954±0.48   | 2.76E-03 |
| cg23765993 | 20 | 44176029  | EPPIN    | 1.092±0.254  | 0.713±0.785  | 2.76E-03 |
| cg23165541 | 15 | 64338164  | DAPK2    | -0.753±0.338 | -0.372±0.763 | 2.76E-03 |
| cg27465566 | 5  | 14142574  | TRIO     | -4.051±0.396 | -3.568±0.977 | 2.77E-03 |
| cg25583174 | 4  | 123748386 | FGF2     | -4.727±0.426 | -3.91±1.72   | 2.77E-03 |
| cg03622431 | 1  | 84864880  | DNASE2B  | 2.689±0.225  | 2.511±0.323  | 2.77E-03 |
| cg08235271 | 1  | 82266030  | LPHN2    | -4.144±0.585 | -3.607±1.028 | 2.77E-03 |
| cg13951472 | 22 | 37956103  | CDC42EP1 | -2.525±0.353 | -2.23±0.546  | 2.78E-03 |
| cg07152925 | 21 | 48024683  | S100B    | 0.503±0.221  | 0.203±0.617  | 2.78E-03 |
| cg23964386 | 9  | 114362249 | PTGR1    | -2.813±0.439 | -2.419±0.75  | 2.79E-03 |
| cg08555657 | 1  | 153068231 | SPRR2E   | 1.363±0.224  | 1.006±0.745  | 2.79E-03 |
| cg10500283 | 1  | 7913081   | UTS2     | 1.012±0.358  | 1.381±0.726  | 2.79E-03 |
| cg16109297 | 1  | 43824900  | CDC20    | -2.244±0.251 | -2.476±0.444 | 2.80E-03 |
| cg27159719 | 8  | 133772742 | TMEM71   | -0.766±0.338 | -1.298±1.11  | 2.80E-03 |
| cg04036898 | 1  | 46664598  | POMGNT1  | -1.575±0.279 | -1.865±0.572 | 2.81E-03 |
| cg10940418 | 6  | 33167305  | RXRB     | -0.27±0.314  | 0.153±0.871  | 2.81E-03 |
| cg26607785 | 17 | 45810424  | TBX21    | -2.026±0.235 | -1.62±0.852  | 2.81E-03 |
| cg02105377 | 3  | 66024554  | MAGI1    | -5.504±0.499 | -5.149±0.608 | 2.82E-03 |
| cg03001305 | 17 | 40439492  | STAT5A   | -1.435±0.378 | -0.886±1.137 | 2.82E-03 |
| cg27388462 | 6  | 31138133  | POU5F1   | 2.744±0.249  | 2.524±0.417  | 2.83E-03 |
| cg20891301 | 4  | 4864711   | MSX1     | 0.812±0.186  | 1.022±0.422  | 2.83E-03 |
| cg01182873 | 7  | 141464291 | TAS2R3   | 1.987±0.233  | 1.794±0.358  | 2.83E-03 |
| cg08935301 | 3  | 8543732   | LMCD1    | -1.999±0.385 | -1.624±0.731 | 2.84E-03 |
| cg21331335 | 9  | 2717325   | KCNV2    | 3.334±0.205  | 3.211±0.181  | 2.84E-03 |
| cg09852871 | 16 | 739598    | WDR24    | 2.403±0.377  | 2.063±0.649  | 2.84E-03 |
| cg23953831 | 1  | 117544416 | CD101    | -0.067±0.439 | -0.515±0.883 | 2.84E-03 |
| cg20550118 | 15 | 78633662  | CRABP1   | -2.946±0.318 | -2.552±0.804 | 2.84E-03 |
| cg04338788 | 3  | 52478874  | SEMA3G   | 2.207±0.509  | 2.555±0.583  | 2.84E-03 |
| cg10938446 | 2  | 113875723 | IL1RN    | 2.917±0.258  | 2.562±0.733  | 2.84E-03 |
| cg09144422 | 16 | 68056595  | DUS2L    | -4.839±0.418 | -4.348±0.991 | 2.85E-03 |
| cg10210238 | 9  | 22005995  | CDKN2B   | -0.466±0.333 | 0.036±1.046  | 2.85E-03 |
| cg15003434 | 9  | 136202985 | SURF6    | -3.677±0.463 | -3.372±0.498 | 2.85E-03 |
| cg26220350 | 20 | 44540621  | PLTP     | -3.569±0.462 | -2.934±1.312 | 2.86E-03 |
| cg14799446 | 19 | 47250607  | STRN4    | 0.006±0.223  | 0.318±0.644  | 2.86E-03 |
| cg25866075 | 19 | 54327780  | NLRP12   | -0.421±0.393 | -0.902±0.978 | 2.86E-03 |
| cg10247252 | 17 | 74071168  | GALR2    | -2.29±0.361  | -1.813±0.98  | 2.87E-03 |
| cg03712843 | 13 | 39565534  | STOML3   | 2.324±0.13   | 2.191±0.262  | 2.87E-03 |
| cg17558126 | 1  | 206680250 | RASSF5   | -2.05±0.653  | -2.609±1.051 | 2.87E-03 |
| cg14747225 | 16 | 103024    | POLR3K   | -3.122±0.495 | -3.415±0.424 | 2.88E-03 |
| cg16747567 | 14 | 71373858  | PCNX     | -4.131±0.432 | -4.441±0.536 | 2.88E-03 |
| cg26053864 | 15 | 35087635  | ACTC1    | -3.494±0.489 | -2.772±1.5   | 2.88E-03 |
| cg23166362 | 1  | 9711965   | PIK3CD   | -5.187±0.574 | -4.368±1.698 | 2.88E-03 |

|            |    |           |           |              |              |          |
|------------|----|-----------|-----------|--------------|--------------|----------|
| cg13614083 | 1  | 6085872   | KCNAB2    | 0.631±0.407  | 0.176±0.915  | 2.88E-03 |
| cg22510822 | 17 | 3337427   | OR1E2     | 1.711±0.251  | 1.309±0.84   | 2.88E-03 |
| cg15612847 | 2  | 99796318  | MITD1     | 2.562±0.372  | 2.082±0.984  | 2.88E-03 |
| cg07705835 | 3  | 9959128   | IL17RC    | -1.076±0.346 | -0.744±0.648 | 2.89E-03 |
| cg18219951 | 5  | 161494810 | GABRG2    | -4.128±0.58  | -3.739±0.644 | 2.89E-03 |
| cg10731022 | 5  | 139927252 | EIF4EBP3  | -5.863±0.671 | -5.074±1.6   | 2.89E-03 |
| cg17416146 | 5  | 139927242 | EIF4EBP3  | -4.541±0.558 | -3.853±1.404 | 2.90E-03 |
| cg20891917 | 7  | 112064031 | IFRD1     | 3.65±0.33    | 3.377±0.507  | 2.90E-03 |
| cg04382920 | 4  | 128651526 | SLC25A31  | 5.941±0.489  | 5.637±0.467  | 2.90E-03 |
| cg08373610 | 2  | 198540621 | RFTN2     | -3.141±0.408 | -2.77±0.711  | 2.90E-03 |
| cg21324308 | 1  | 110993852 | PROK1     | 0.81±0.285   | 1.136±0.656  | 2.91E-03 |
| cg14424530 | 13 | 30170129  | SLC7A1    | -4.807±0.44  | -5.06±0.351  | 2.91E-03 |
| cg15755084 | 4  | 4861683   | MSX1      | -4.355±0.616 | -3.647±1.43  | 2.92E-03 |
| cg09604428 | 3  | 52721277  | GNL3      | 1.79±0.396   | 1.367±0.844  | 2.92E-03 |
| cg20792833 | 11 | 67205195  | PTPRCAP   | 0.966±0.347  | 0.632±0.649  | 2.92E-03 |
| cg01192952 | 19 | 40195142  | LGALS14   | 0.303±0.318  | 0.666±0.735  | 2.92E-03 |
| cg10099900 | 20 | 1093733   | PSMF1     | 1.739±0.204  | 1.483±0.525  | 2.92E-03 |
| cg07149772 | 8  | 25314972  | KCTD9     | -4.089±0.417 | -3.823±0.422 | 2.92E-03 |
| cg02282237 | 14 | 61788862  | PRKCH     | -5.125±0.472 | -4.739±0.716 | 2.93E-03 |
| cg11953334 | 19 | 48897863  | GRIN2D    | -3.203±0.271 | -2.809±0.821 | 2.94E-03 |
| cg11372831 | 4  | 57303157  | PAICS     | -3.152±0.314 | -3.384±0.41  | 2.94E-03 |
| cg07210490 | 12 | 50479634  | SMARCD1   | -4.804±0.491 | -4.38±0.802  | 2.94E-03 |
| cg16977872 | 11 | 64008132  | FKBP2     | -4.938±0.446 | -5.205±0.394 | 2.95E-03 |
| cg10128164 | 14 | 31344535  | COCH      | -3.552±0.318 | -3.136±0.855 | 2.95E-03 |
| cg10712623 | 3  | 25469577  | RARB      | -2.436±0.222 | -2.229±0.4   | 2.95E-03 |
| cg22815534 | 22 | 17646263  | CECR5     | 0.619±0.25   | 0.377±0.474  | 2.96E-03 |
| cg08045757 | 12 | 48192686  | HDAC7     | 2.192±0.158  | 2.306±0.198  | 2.96E-03 |
| cg26021627 | 8  | 53478706  | FAM150A   | -3.37±0.363  | -2.823±1.143 | 2.96E-03 |
| cg00174500 | 14 | 23846479  | CMTM5     | -0.169±0.294 | 0.213±0.785  | 2.97E-03 |
| cg00211661 | 11 | 72433619  | ARAP1     | -4.389±0.311 | -3.748±1.366 | 2.97E-03 |
| cg12663253 | 5  | 67522532  | PIK3R1    | 2.868±0.175  | 2.975±0.161  | 2.97E-03 |
| cg09628707 | 20 | 43729410  | KCNS1     | -1.047±0.165 | -0.764±0.599 | 2.98E-03 |
| cg17470697 | 10 | 81205925  | ZCCHC24   | -4.57±0.46   | -4.259±0.519 | 2.98E-03 |
| cg09155025 | 8  | 145642024 | SLC39A4   | 1.854±0.307  | 1.411±0.923  | 2.98E-03 |
| cg13352495 | 5  | 54529851  | CCNO      | -4.054±0.238 | -4.243±0.346 | 2.99E-03 |
| cg06940574 | 1  | 6297128   | LINC00337 | 3.51±0.211   | 3.27±0.486   | 2.99E-03 |
| cg25025866 | 19 | 7598787   | PNPLA6    | -3.178±0.435 | -2.771±0.791 | 2.99E-03 |
| cg13084335 | 11 | 111782670 | CRYAB     | -2.612±0.473 | -2.174±0.849 | 2.99E-03 |
| cg24697184 | 1  | 55266578  | TTC22     | -3.033±0.695 | -2.489±0.992 | 2.99E-03 |
| cg24934431 | 10 | 104597864 | CYP17A1   | 1.798±0.301  | 1.548±0.469  | 3.00E-03 |
| cg22748573 | 1  | 41327924  | CITED4    | -4.441±0.552 | -3.848±1.187 | 3.00E-03 |
| cg07115820 | 17 | 56270249  | EPX       | 0.003±0.237  | 0.336±0.692  | 3.00E-03 |
| cg02314308 | 1  | 184006972 | COLGALT2  | -2.708±0.267 | -3.126±0.875 | 3.00E-03 |
| cg22428102 | 4  | 184020710 | WWC2      | -4.941±0.759 | -4.373±1.015 | 3.00E-03 |
| cg24498554 | 17 | 61974237  | CSH1      | 1.097±0.162  | 0.768±0.703  | 3.00E-03 |
| cg04394967 | 14 | 68189457  | RDH12     | -3.708±0.324 | -3.119±1.249 | 3.00E-03 |
| cg18127191 | 1  | 91966734  | CDC7      | -4.573±0.377 | -4.333±0.382 | 3.00E-03 |
| cg15182360 | 13 | 61989737  | PCDH20    | -3.893±0.424 | -3.507±0.744 | 3.00E-03 |
| cg23221013 | 7  | 99817027  | PVRIG     | 0.784±0.295  | 0.543±0.449  | 3.00E-03 |
| cg14913610 | 12 | 9142341   | KLRG1     | 1.311±0.388  | 0.874±0.883  | 3.00E-03 |
| cg11469321 | 4  | 104021294 | BDH2      | -2.072±0.297 | -1.782±0.57  | 3.01E-03 |
| cg24574111 | 1  | 85331084  | LPAR3     | 2.299±0.214  | 1.919±0.804  | 3.02E-03 |
| cg19324627 | 11 | 116708329 | APOA1     | 1.491±0.332  | 1.822±0.654  | 3.02E-03 |
| cg07328579 | 12 | 104443770 | GLT8D2    | -3.052±0.336 | -2.588±0.964 | 3.03E-03 |
| cg23548479 | 11 | 2906679   | CDKN1C    | -4.592±0.612 | -4.155±0.762 | 3.03E-03 |
| cg12616277 | 3  | 138153763 | ESYT3     | -3.068±0.451 | -2.723±0.623 | 3.03E-03 |
| cg05001145 | 5  | 95297731  | ELL2      | -3.588±0.473 | -3.247±0.598 | 3.04E-03 |
| cg24981018 | 8  | 143695376 | ARC       | 0.052±0.201  | 0.291±0.487  | 3.04E-03 |
| cg13140464 | 15 | 83380023  | AP3B2     | 3.441±0.252  | 3.235±0.384  | 3.05E-03 |
| cg14904464 | 12 | 45269790  | NELL2     | -4.759±0.361 | -4.273±1.009 | 3.05E-03 |
| cg03264209 | 16 | 3931885   | 0         | 0.44±0.133   | 0.218±0.468  | 3.05E-03 |
| cg08837884 | 19 | 4540782   | LRG1      | 0.533±0.252  | 0.789±0.509  | 3.06E-03 |
| cg19177941 | 15 | 101420185 | ALDH1A3   | -1.336±0.379 | -1.025±0.581 | 3.06E-03 |
| cg04588079 | 12 | 13153012  | HEBP1     | -5.035±0.621 | -4.553±0.88  | 3.06E-03 |
| cg08023751 | 2  | 112655112 | MERTK     | 1.377±0.322  | 1.75±0.76    | 3.06E-03 |
| cg10244047 | 6  | 69346114  | BAI3      | -4.251±0.276 | -3.795±0.964 | 3.07E-03 |
| cg21516478 | 5  | 150400328 | GPX3      | -3.32±0.268  | -2.955±0.76  | 3.07E-03 |

|            |    |           |                  |              |              |          |
|------------|----|-----------|------------------|--------------|--------------|----------|
| cg14658362 | 8  | 30241661  | <i>RBPMS</i>     | -4.756±0.486 | -4.42±0.572  | 3.08E-03 |
| cg21577049 | 2  | 228736449 | <i>DAW1</i>      | -4.685±0.487 | -3.896±1.665 | 3.08E-03 |
| cg04070847 | 3  | 112693867 | <i>CD200R1</i>   | -1.59±0.27   | -1.207±0.799 | 3.08E-03 |
| cg25425078 | 12 | 4381777   | <i>CCND2</i>     | -4.735±0.502 | -3.961±1.63  | 3.09E-03 |
| cg16991589 | 13 | 25670047  | <i>PABPC3</i>    | -0.359±0.468 | 0.069±0.828  | 3.10E-03 |
| cg23037133 | 13 | 97646811  | <i>OXGR1</i>     | -2.879±0.342 | -2.473±0.829 | 3.10E-03 |
| cg07753644 | 19 | 10222175  | <i>P2RY11</i>    | -0.104±0.411 | -0.52±0.829  | 3.10E-03 |
| cg15228639 | 15 | 42289939  | <i>PLA2G4E</i>   | 0.209±0.23   | -0.106±0.656 | 3.11E-03 |
| cg08695830 | 7  | 73703459  | <i>CLIP2</i>     | -3.894±0.361 | -4.141±0.42  | 3.11E-03 |
| cg12243271 | 4  | 110722702 | <i>CFI</i>       | 0.105±0.341  | 0.448±0.682  | 3.12E-03 |
| cg10889792 | 11 | 71258917  | <i>KRTAP5-9</i>  | 1.888±0.232  | 1.552±0.703  | 3.12E-03 |
| cg16636110 | 19 | 57702479  | <i>ZNF264</i>    | 0.375±0.267  | 0.7±0.668    | 3.13E-03 |
| cg12529228 | 1  | 160336994 | <i>NHLH1</i>     | 2.752±0.292  | 2.397±0.728  | 3.13E-03 |
| cg01765461 | 18 | 59992984  | <i>TNFRSF11A</i> | -4.518±0.286 | -4.769±0.48  | 3.14E-03 |
| cg25665528 | 16 | 2260870   | <i>BRICD5</i>    | 1.442±0.257  | 1.675±0.452  | 3.14E-03 |
| cg08514736 | 5  | 54529368  | <i>CCNO</i>      | -4.549±0.32  | -4.933±0.787 | 3.15E-03 |
| cg07139440 | 1  | 151030981 | <i>CDC42SE1</i>  | -3.821±0.365 | -3.223±1.268 | 3.16E-03 |
| cg08717396 | 6  | 27100775  | <i>HIST1H2AG</i> | -3.884±0.489 | -3.116±1.621 | 3.17E-03 |
| cg21478437 | 1  | 206317403 | <i>CTSE</i>      | 1.012±0.321  | 0.503±1.076  | 3.17E-03 |
| cg22458065 | 6  | 31108108  | <i>PSORS1C2</i>  | 2.351±0.237  | 2.159±0.359  | 3.19E-03 |
| cg03354772 | 10 | 134756503 | <i>TTC40</i>     | -2.861±0.443 | -2.441±0.826 | 3.19E-03 |
| cg01471713 | 1  | 220864279 | <i>C1orf115</i>  | -2.249±0.385 | -1.761±1.01  | 3.19E-03 |
| cg12240237 | 7  | 73946402  | <i>GTF2IRD1</i>  | 1.264±0.351  | 0.943±0.625  | 3.19E-03 |
| cg24888049 | 15 | 91426667  | <i>FES</i>       | 0.569±0.171  | 0.79±0.457   | 3.20E-03 |
| cg07031996 | 1  | 38324738  | <i>MTF1</i>      | -3.41±0.343  | -3.068±0.681 | 3.21E-03 |
| cg11299964 | 9  | 128469783 | <i>MAPKAP1</i>   | -2.586±0.387 | -2.911±0.615 | 3.21E-03 |
| cg00436603 | 10 | 135340740 | <i>CYP2E1</i>    | 1.151±0.312  | 0.809±0.692  | 3.21E-03 |
| cg04008901 | 7  | 82072779  | <i>CACNA2D1</i>  | -2.715±0.575 | -2.174±1.061 | 3.21E-03 |
| cg20664201 | 12 | 57849270  | <i>INHBE</i>     | 0.409±0.212  | 0.721±0.656  | 3.21E-03 |
| cg07706362 | 19 | 23578365  | <i>ZNF91</i>     | -4.053±0.347 | -3.714±0.674 | 3.24E-03 |
| cg23657409 | 20 | 8112754   | <i>PLCB1</i>     | -3.821±0.427 | -3.288±1.104 | 3.24E-03 |
| cg21081971 | 13 | 38444765  | <i>TRPC4</i>     | -0.133±0.192 | 0.126±0.54   | 3.25E-03 |
| cg05998426 | 11 | 66103925  | <i>RIN1</i>      | -4.716±0.557 | -4.298±0.756 | 3.26E-03 |
| cg17518965 | 19 | 3178955   | <i>S1PR4</i>     | 1.099±0.306  | 0.774±0.657  | 3.26E-03 |
| cg21944455 | 17 | 42994269  | <i>GFAP</i>      | 2.433±0.402  | 2.067±0.715  | 3.27E-03 |
| cg03636183 | 19 | 17000585  | <i>F2RL3</i>     | 1.046±0.203  | 1.354±0.652  | 3.27E-03 |
| cg11139878 | 1  | 157811790 | <i>CD5L</i>      | -1.006±0.304 | -0.557±0.948 | 3.27E-03 |
| cg07123548 | 19 | 40896163  | <i>HIPK4</i>     | 1.805±0.286  | 1.576±0.429  | 3.27E-03 |
| cg22325823 | 17 | 72667062  | <i>RAB37</i>     | -1.732±0.383 | -2.092±0.71  | 3.28E-03 |
| cg03940103 | 19 | 41698823  | <i>CYP2S1</i>    | -3.604±0.358 | -3.306±0.565 | 3.29E-03 |
| cg11513856 | 7  | 100965680 | <i>RABL5</i>     | -0.342±0.203 | -0.615±0.573 | 3.30E-03 |
| cg19342782 | 1  | 70821806  | <i>HHLA3</i>     | -2.037±0.42  | -1.653±0.751 | 3.31E-03 |
| cg23326301 | 1  | 120439812 | <i>ADAM30</i>    | 2.529±0.151  | 2.378±0.303  | 3.31E-03 |
| cg04683240 | 1  | 221052886 | <i>HLX</i>       | -4.315±0.379 | -3.57±1.602  | 3.31E-03 |
| cg01549015 | 9  | 21206380  | <i>IFNA10</i>    | 1.881±0.408  | 1.592±0.509  | 3.31E-03 |
| cg16585682 | 5  | 180017623 | <i>SCGB3A1</i>   | -4.112±0.43  | -3.595±1.067 | 3.31E-03 |
| cg14430111 | 11 | 64879374  | <i>TM7SF2</i>    | -5.615±0.644 | -6.029±0.675 | 3.31E-03 |
| cg17484237 | 5  | 156536107 | <i>HAVCR2</i>    | -1.159±0.316 | -1.615±0.962 | 3.31E-03 |
| cg09775312 | 10 | 93392839  | <i>PPP1R3C</i>   | -5.115±0.752 | -4.387±1.445 | 3.32E-03 |
| cg04286933 | 22 | 39472743  | <i>APOBEC3G</i>  | -1.824±0.199 | -1.463±0.774 | 3.33E-03 |
| cg26623286 | 17 | 6555130   | <i>C17orf100</i> | -5.605±0.422 | -5.873±0.432 | 3.33E-03 |
| cg12148919 | 6  | 128841705 | <i>PTPRK</i>     | -3.639±0.738 | -3.112±0.932 | 3.33E-03 |
| cg19974223 | 12 | 52281676  | <i>ANKRD33</i>   | 0.668±0.382  | 1.082±0.843  | 3.33E-03 |
| cg13801416 | 7  | 134143919 | <i>AKR1B1</i>    | -4.714±0.469 | -3.816±1.928 | 3.33E-03 |
| cg23917399 | 5  | 118691751 | <i>TNFAIP8</i>   | -3.57±0.722  | -2.783±1.604 | 3.34E-03 |
| cg13129046 | 10 | 71389696  | <i>C10orf35</i>  | -2.034±0.208 | -2.275±0.495 | 3.35E-03 |
| cg05010623 | 2  | 158485762 | <i>ACVR1C</i>    | -4.106±0.305 | -4.374±0.519 | 3.35E-03 |
| cg03641225 | 1  | 68512539  | <i>DIRAS3</i>    | -0.297±0.2   | -0.64±0.733  | 3.36E-03 |
| cg01991150 | 11 | 46407677  | <i>CHRM4</i>     | 3.07±0.231   | 2.928±0.223  | 3.36E-03 |
| cg04353483 | 4  | 26493496  | <i>CCKAR</i>     | 1.587±0.255  | 1.21±0.797   | 3.36E-03 |
| cg27567335 | 2  | 238768074 | <i>RAMP1</i>     | -2.707±0.262 | -2.901±0.349 | 3.37E-03 |
| cg11765205 | 13 | 50202547  | <i>ARL11</i>     | -1.512±0.302 | -1.994±1.028 | 3.38E-03 |
| cg11919694 | 16 | 30380600  | <i>TBC1D10B</i>  | -3.66±0.324  | -3.256±0.841 | 3.38E-03 |
| cg22825487 | 6  | 133055183 | <i>VNN3</i>      | 1.402±0.444  | 0.884±1.068  | 3.38E-03 |
| cg19596755 | 11 | 68609747  | <i>CPT1A</i>     | -2.199±0.352 | -2.665±0.975 | 3.38E-03 |
| cg24477567 | 19 | 11495295  | <i>EPOR</i>      | 0.179±0.279  | 0.544±0.762  | 3.38E-03 |
| cg14974772 | 14 | 92414425  | <i>FBLN5</i>     | -2.418±0.485 | -1.973±0.874 | 3.39E-03 |

|            |    |           |                    |              |              |          |
|------------|----|-----------|--------------------|--------------|--------------|----------|
| cg23036025 | 19 | 59023916  | <i>SLC27A5</i>     | 2.243±0.155  | 2.006±0.503  | 3.39E-03 |
| cg10670077 | 19 | 7293341   | <i>INSR</i>        | -0.379±0.29  | -0.058±0.656 | 3.39E-03 |
| cg26847490 | 7  | 95115289  | <i>ASB4</i>        | -0.384±0.331 | 0.04±0.885   | 3.40E-03 |
| cg19356189 | 19 | 51524690  | <i>KLK10</i>       | -1.08±0.258  | -1.387±0.635 | 3.40E-03 |
| cg22991148 | 21 | 46131099  | <i>TSPEAR</i>      | -3.386±0.353 | -3.655±0.495 | 3.40E-03 |
| cg07799947 | 2  | 101436171 | <i>NPAS2</i>       | -1.254±0.155 | -1.122±0.255 | 3.41E-03 |
| cg23871659 | 2  | 161993364 | <i>TANK</i>        | -2.235±0.345 | -1.838±0.816 | 3.41E-03 |
| cg02117021 | 6  | 29425960  | <i>OR2H1</i>       | 3.031±0.231  | 2.805±0.451  | 3.42E-03 |
| cg11769360 | 5  | 96215016  | <i>ERAP2</i>       | 2.535±0.275  | 2.351±0.313  | 3.42E-03 |
| cg16852892 | 8  | 89339473  | <i>MMP16</i>       | -5.112±0.469 | -4.691±0.822 | 3.42E-03 |
| cg12800028 | 6  | 110300146 | <i>GPR6</i>        | -1.461±0.273 | -1.13±0.687  | 3.43E-03 |
| cg15842430 | 14 | 21237111  | <i>EDDM3B</i>      | 2.055±0.302  | 1.735±0.65   | 3.45E-03 |
| cg20041257 | 19 | 10828819  | <i>DNM2</i>        | -3.391±0.396 | -3.112±0.493 | 3.45E-03 |
| cg04504095 | 6  | 1610688   | <i>FOXC1</i>       | -4.508±0.602 | -4.078±0.765 | 3.45E-03 |
| cg12766348 | 5  | 178054039 | <i>CLK4</i>        | -5.368±0.623 | -4.965±0.668 | 3.45E-03 |
| cg26267310 | 19 | 49340593  | <i>HSD17B14</i>    | -2.585±0.54  | -1.795±1.676 | 3.45E-03 |
| cg03886898 | 1  | 54359132  | <i>DIO1</i>        | 1.378±0.18   | 1.589±0.435  | 3.47E-03 |
| cg20654468 | 11 | 58342997  | <i>LPXN</i>        | 0.226±0.32   | -0.091±0.636 | 3.47E-03 |
| cg23109897 | 8  | 48871883  | <i>PRKDC</i>       | -1.214±0.261 | -1.483±0.539 | 3.47E-03 |
| cg02382666 | 7  | 134463454 | <i>CALD1</i>       | 2.014±0.243  | 1.675±0.717  | 3.49E-03 |
| cg16711185 | 15 | 49255875  | <i>SHC4</i>        | -4.477±0.477 | -4.153±0.56  | 3.50E-03 |
| cg07786760 | 4  | 155412677 | <i>DCHS2</i>       | -4.776±0.407 | -4.378±0.798 | 3.50E-03 |
| cg13302154 | 12 | 15039432  | <i>MGP</i>         | -1.927±0.393 | -1.569±0.706 | 3.51E-03 |
| cg00481227 | 20 | 36322069  | <i>CTNBL1</i>      | -2.579±0.297 | -2.874±0.594 | 3.52E-03 |
| cg20451680 | 5  | 54281336  | <i>ESM1</i>        | -0.407±0.36  | -0.084±0.635 | 3.53E-03 |
| cg18416881 | 7  | 134143823 | <i>AKR1B1</i>      | -5.482±0.52  | -4.5±2.121   | 3.53E-03 |
| cg03115746 | 4  | 1895023   | <i>WHSC1</i>       | 1.523±0.245  | 1.385±0.196  | 3.53E-03 |
| cg17407908 | 6  | 32153115  | <i>AGER</i>        | 1.866±0.202  | 1.627±0.497  | 3.53E-03 |
| cg19118533 | 6  | 111927323 | <i>TRAF3IP2</i>    | -4.004±0.456 | -4.321±0.557 | 3.55E-03 |
| cg01400401 | 19 | 4769531   | <i>MIR7-3HG</i>    | -1.54±0.272  | -1.252±0.589 | 3.55E-03 |
| cg06251129 | 1  | 155990657 | <i>SSR2</i>        | -2.743±0.535 | -3.076±0.536 | 3.57E-03 |
| cg02034222 | 2  | 74753281  | <i>DQX1</i>        | 2.309±0.379  | 1.938±0.736  | 3.57E-03 |
| cg17505463 | 22 | 18780198  | <i>GGT3P</i>       | 1.9±0.323    | 1.635±0.507  | 3.58E-03 |
| cg10559803 | 1  | 178693897 | <i>RALGPS2</i>     | -0.291±0.193 | -0.576±0.605 | 3.58E-03 |
| cg13599477 | 10 | 5488485   | <i>NET1</i>        | -3.097±0.552 | -2.685±0.754 | 3.58E-03 |
| cg27600136 | 13 | 27844156  | <i>RASL11A</i>     | 1.307±0.192  | 1.16±0.273   | 3.59E-03 |
| cg23686014 | 7  | 93519924  | <i>TFPI2</i>       | -4.179±0.337 | -3.6±1.245   | 3.59E-03 |
| cg19564367 | 4  | 7941852   | <i>AFAP1</i>       | -2.429±0.355 | -2.058±0.756 | 3.59E-03 |
| cg18954434 | 22 | 46692881  | <i>GTSE1</i>       | -4.618±0.631 | -4.211±0.679 | 3.59E-03 |
| cg03621001 | 19 | 16221719  | <i>RAB8A</i>       | 1.347±0.449  | 1.745±0.78   | 3.61E-03 |
| cg00128560 | 16 | 3352013   | <i>TIGD7</i>       | 2.41±0.346   | 2.622±0.334  | 3.62E-03 |
| cg11814446 | 12 | 65562996  | <i>LEMD3</i>       | -3.928±0.362 | -4.184±0.455 | 3.62E-03 |
| cg26632776 | 21 | 45875534  | <i>LRRC3</i>       | -3.946±0.654 | -3.369±1.131 | 3.63E-03 |
| cg11170179 | 19 | 51522767  | <i>KLK10</i>       | -3.402±0.374 | -3.077±0.634 | 3.64E-03 |
| cg05275605 | 21 | 46844883  | <i>COL18A1-AS1</i> | 2.773±0.218  | 2.49±0.598   | 3.64E-03 |
| cg03528946 | 9  | 38069800  | <i>SHB</i>         | -3.317±0.336 | -3.617±0.59  | 3.64E-03 |
| cg10557828 | 3  | 145879642 | <i>PLOD2</i>       | -2.641±0.455 | -2.286±0.664 | 3.65E-03 |
| cg02523400 | 22 | 21128191  | <i>SERPIND1</i>    | 1.983±0.291  | 2.296±0.636  | 3.65E-03 |
| cg11113534 | 20 | 31756024  | <i>BPIFA2</i>      | 3.08±0.33    | 2.701±0.786  | 3.66E-03 |
| cg06990298 | 17 | 17399700  | <i>RASD1</i>       | -4.968±0.444 | -4.611±0.677 | 3.66E-03 |
| cg12853521 | 18 | 13824359  | <i>MC5R</i>        | -2.619±0.481 | -2.974±0.647 | 3.66E-03 |
| cg19615059 | 12 | 110270919 | <i>MIR4497</i>     | -3.58±0.433  | -3.2±0.745   | 3.67E-03 |
| cg13857100 | 8  | 20041700  | <i>SLC18A1</i>     | 3.625±0.367  | 3.335±0.548  | 3.68E-03 |
| cg03491478 | 11 | 45906914  | <i>MAPK8IP1</i>    | -2.39±0.266  | -2.042±0.736 | 3.69E-03 |
| cg10126874 | 12 | 107487097 | <i>CRY1</i>        | -5.517±0.751 | -5.015±0.864 | 3.71E-03 |
| cg15696627 | 4  | 4861183   | <i>MSX1</i>        | -3.884±0.39  | -3.272±1.317 | 3.72E-03 |
| cg09470640 | 12 | 15476028  | <i>PTPRO</i>       | -4.269±0.358 | -3.85±0.875  | 3.73E-03 |
| cg04483754 | 17 | 26128980  | <i>NOS2</i>        | 2.695±0.201  | 2.447±0.521  | 3.73E-03 |
| cg19646028 | 19 | 4769240   | <i>MIR7-3HG</i>    | -1.656±0.293 | -1.316±0.707 | 3.73E-03 |
| cg26260350 | 2  | 63277932  | <i>OTX1</i>        | -4.811±0.516 | -5.181±0.669 | 3.73E-03 |
| cg26675382 | 6  | 150067846 | <i>NUP43</i>       | -2.466±0.348 | -2.727±0.483 | 3.73E-03 |
| cg20727114 | 19 | 50194120  | <i>CPT1C</i>       | -3.548±0.484 | -3.004±1.129 | 3.74E-03 |
| cg13745870 | 3  | 57094763  | <i>SPATA12</i>     | -0.774±0.255 | -1.101±0.689 | 3.75E-03 |
| cg14498423 | 3  | 139653328 | <i>CLSTN2</i>      | -1.259±0.337 | -0.88±0.785  | 3.75E-03 |
| cg08909157 | 9  | 215561    | <i>C9orf66</i>     | -1.807±0.396 | -2.164±0.706 | 3.77E-03 |
| cg08901867 | 17 | 46871042  | <i>TTLL6</i>       | 1.925±0.387  | 1.562±0.726  | 3.77E-03 |
| cg17457560 | 8  | 32405851  | <i>NRG1</i>        | -2.899±0.71  | -2.31±1.135  | 3.78E-03 |

|            |    |           |                   |              |              |          |
|------------|----|-----------|-------------------|--------------|--------------|----------|
| cg20352371 | 12 | 41831595  | <i>PDZRN4</i>     | 1.007±0.34   | 1.274±0.504  | 3.78E-03 |
| cg10994430 | 9  | 112542080 | <i>PALM2</i>      | -3.14±0.382  | -2.697±0.924 | 3.78E-03 |
| cg14120436 | 15 | 52483498  | <i>GNB5</i>       | 0.209±0.253  | 0.493±0.589  | 3.78E-03 |
| cg12374577 | 4  | 69817049  | <i>UGT2A3</i>     | 0.644±0.279  | 0.919±0.559  | 3.80E-03 |
| cg25189085 | 12 | 57644658  | <i>STAC3</i>      | 1.821±0.259  | 2.046±0.441  | 3.80E-03 |
| cg07489134 | 10 | 96305958  | <i>HELLS</i>      | -4.935±0.312 | -5.138±0.345 | 3.80E-03 |
| cg09238677 | 12 | 8218922   | <i>C3AR1</i>      | -1.017±0.385 | -1.375±0.716 | 3.81E-03 |
| cg09039163 | 2  | 239009036 | <i>ESPNL</i>      | 0.598±0.235  | 0.295±0.642  | 3.81E-03 |
| cg19616230 | 4  | 25657429  | <i>SLC34A2</i>    | -3.622±1.141 | -2.811±1.46  | 3.84E-03 |
| cg19985911 | 12 | 58209674  | <i>AVIL</i>       | 2.007±0.201  | 1.646±0.786  | 3.84E-03 |
| cg04688368 | 10 | 79397346  | <i>KCNMA1</i>     | -3.78±0.308  | -3.186±1.296 | 3.84E-03 |
| cg03740216 | 19 | 10397561  | <i>ICAM4</i>      | -3.303±0.352 | -2.987±0.626 | 3.84E-03 |
| cg09134726 | 19 | 841082    | <i>PRTN3</i>      | 1.085±0.271  | 0.656±0.926  | 3.84E-03 |
| cg26385743 | 2  | 131101463 | <i>IMP4</i>       | 3.278±0.389  | 2.819±0.961  | 3.84E-03 |
| cg06101324 | 1  | 152955543 | <i>SPRR1A</i>     | -0.559±0.271 | -1.01±0.976  | 3.85E-03 |
| cg14727512 | 22 | 19118918  | <i>TSSK2</i>      | 2.694±0.232  | 2.898±0.401  | 3.85E-03 |
| cg14341579 | 13 | 110438906 | <i>IRS2</i>       | -4.176±1.488 | -3.259±1.481 | 3.85E-03 |
| cg26399035 | 16 | 20753649  | <i>THUMPD1</i>    | 0.753±0.205  | 0.477±0.588  | 3.85E-03 |
| cg24105685 | 9  | 95298969  | <i>ECM2</i>       | 0.607±0.28   | 0.895±0.589  | 3.87E-03 |
| cg10517312 | 15 | 45027253  | <i>TRIM69</i>     | -0.079±0.251 | -0.396±0.672 | 3.87E-03 |
| cg21939221 | 11 | 47737371  | <i>AGBL2</i>      | 2.727±0.255  | 2.553±0.308  | 3.88E-03 |
| cg27035169 | 14 | 23653098  | <i>SLC7A8</i>     | -1.627±0.371 | -1.26±0.747  | 3.88E-03 |
| cg06229674 | 22 | 39492189  | <i>APOBEC3H</i>   | 2.719±0.289  | 2.512±0.374  | 3.88E-03 |
| cg18429742 | 5  | 851101    | <i>ZDHHC11</i>    | 0.714±0.344  | 0.341±0.774  | 3.89E-03 |
| cg08872493 | 1  | 23521417  | <i>HTR1D</i>      | 0.185±0.258  | -0.152±0.717 | 3.90E-03 |
| cg27425675 | 16 | 11035733  | <i>DEXI</i>       | 0.021±0.228  | 0.184±0.295  | 3.90E-03 |
| cg14984920 | 7  | 25164393  | <i>CYCS</i>       | -3.879±0.604 | -4.224±0.51  | 3.91E-03 |
| cg11120551 | 1  | 146713996 | <i>CHD1L</i>      | -1.244±0.276 | -1.618±0.799 | 3.91E-03 |
| cg10003443 | 20 | 22567170  | <i>FOXA2</i>      | -1.651±0.234 | -1.265±0.836 | 3.92E-03 |
| cg19850348 | 15 | 55880997  | <i>PYGO1</i>      | -4.292±0.675 | -3.722±1.113 | 3.92E-03 |
| cg13585240 | 3  | 48959375  | <i>ARIH2</i>      | 0.854±0.292  | 0.576±0.561  | 3.94E-03 |
| cg21184011 | 16 | 88636102  | <i>ZC3H18</i>     | -2.736±0.287 | -2.942±0.375 | 3.95E-03 |
| cg10560038 | 14 | 23844876  | <i>CMTM5</i>      | 3.572±0.288  | 3.192±0.811  | 3.95E-03 |
| cg00614413 | 19 | 5286594   | <i>PTPRS</i>      | -0.419±0.392 | -0.705±0.523 | 3.95E-03 |
| cg11498156 | 10 | 102890145 | <i>TLX1NB</i>     | -0.931±0.34  | -0.586±0.707 | 3.95E-03 |
| cg13850625 | 4  | 159131690 | <i>TMEM144</i>    | -4.053±0.788 | -3.438±1.164 | 3.95E-03 |
| cg05044994 | 3  | 187896605 | <i>FLJ42393</i>   | 0.422±0.297  | 0.68±0.507   | 3.95E-03 |
| cg07924575 | 22 | 26881231  | <i>SRRD</i>       | -0.381±0.273 | 0.034±0.896  | 3.96E-03 |
| cg23583739 | 22 | 38863908  | <i>KDELR3</i>     | -4.744±0.51  | -4.405±0.589 | 3.96E-03 |
| cg00658007 | 1  | 211666129 | <i>RD3</i>        | -0.463±0.294 | -0.978±1.122 | 3.96E-03 |
| cg19283196 | 4  | 48485233  | <i>SLC10A4</i>    | -2.597±0.215 | -2.234±0.79  | 3.96E-03 |
| cg11884546 | 16 | 31366377  | <i>ITGAX</i>      | -3.118±0.394 | -3.444±0.632 | 3.97E-03 |
| cg14865516 | 5  | 43557751  | <i>PAIP1</i>      | -4.179±0.344 | -4.449±0.513 | 3.97E-03 |
| cg19948393 | 12 | 52281810  | <i>ANKRD33</i>    | 0.4±0.276    | 0.689±0.596  | 3.97E-03 |
| cg15503752 | 17 | 74639731  | <i>ST6GALNAC1</i> | -0.194±0.281 | -0.588±0.846 | 3.97E-03 |
| cg21607649 | 10 | 134884177 | <i>0</i>          | -0.619±0.235 | -0.879±0.542 | 3.98E-03 |
| cg06812977 | 10 | 90343036  | <i>RNLS</i>       | -1.613±1.114 | -2.634±2.044 | 3.99E-03 |
| cg09499849 | 2  | 158695158 | <i>ACVR1</i>      | -1.784±0.386 | -1.251±1.143 | 3.99E-03 |
| cg26776924 | 19 | 1969666   | <i>CSNK1G2</i>    | 2.665±0.289  | 2.479±0.316  | 3.99E-03 |
| cg21487207 | 12 | 54410576  | <i>HOXC5</i>      | -2.726±0.301 | -2.099±1.379 | 4.00E-03 |
| cg06192619 | 19 | 15083616  | <i>SLC1A6</i>     | 3.116±0.161  | 2.942±0.36   | 4.00E-03 |
| cg27654142 | 5  | 178322924 | <i>ZFP2</i>       | -3.472±0.565 | -3.033±0.835 | 4.02E-03 |
| cg06233503 | 11 | 2812674   | <i>KCNQ1</i>      | -2.23±0.297  | -2.489±0.513 | 4.03E-03 |
| cg13118748 | 6  | 30614722  | <i>C6orf136</i>   | -4.911±0.287 | -5.1±0.323   | 4.03E-03 |
| cg03302287 | 12 | 33049650  | <i>PKP2</i>       | -4.839±0.665 | -4.211±1.268 | 4.03E-03 |
| cg17391877 | 6  | 41714182  | <i>PGC</i>        | 2.142±0.268  | 1.844±0.622  | 4.04E-03 |
| cg11081833 | 22 | 37975941  | <i>LGALS2</i>     | 0.274±0.266  | -0.006±0.579 | 4.04E-03 |
| cg09533063 | 6  | 135271589 | <i>ALDH8A1</i>    | 0.371±0.188  | 0.066±0.662  | 4.05E-03 |
| cg07313155 | 17 | 38218601  | <i>THRA</i>       | -3.884±0.412 | -3.512±0.746 | 4.05E-03 |
| cg19905251 | 5  | 168728495 | <i>SLIT3</i>      | -4.635±0.513 | -4.243±0.74  | 4.05E-03 |
| cg26368842 | 10 | 23004020  | <i>PIP4K2A</i>    | 0.723±0.305  | 0.354±0.779  | 4.05E-03 |
| cg23613317 | 5  | 154092109 | <i>LARP1</i>      | 1.022±0.271  | 0.619±0.872  | 4.07E-03 |
| cg00501366 | 17 | 7992476   | <i>ALOX12B</i>    | 1.558±0.17   | 1.223±0.735  | 4.07E-03 |
| cg12575181 | 14 | 68067658  | <i>PIGH</i>       | 3.128±0.194  | 2.916±0.443  | 4.09E-03 |
| cg17083925 | 20 | 36793373  | <i>TGM2</i>       | -1.076±0.278 | -0.789±0.592 | 4.09E-03 |
| cg06399881 | 4  | 69111391  | <i>TMPRSS11B</i>  | 1.593±0.316  | 1.315±0.553  | 4.10E-03 |
| cg03626672 | 2  | 237478664 | <i>ACKR3</i>      | -2.163±0.398 | -1.805±0.715 | 4.10E-03 |

|            |    |           |                     |              |              |          |
|------------|----|-----------|---------------------|--------------|--------------|----------|
| cg25723866 | 19 | 41099080  | <i>LTBP4</i>        | 2.918±0.249  | 2.702±0.426  | 4.11E-03 |
| cg03908676 | 11 | 10590282  | <i>LYVE1</i>        | -0.992±0.256 | -0.695±0.624 | 4.11E-03 |
| cg01765641 | 3  | 17781888  | <i>TBC1D5</i>       | 1.076±0.326  | 0.612±1.002  | 4.12E-03 |
| cg01459162 | 1  | 17574330  | <i>PADI3</i>        | 1.679±0.216  | 1.424±0.537  | 4.12E-03 |
| cg18138500 | 19 | 2653655   | <i>GNG7</i>         | 0.206±0.19   | 0.025±0.366  | 4.12E-03 |
| cg12308275 | 15 | 43558855  | <i>TGM5</i>         | 2.251±0.376  | 1.946±0.59   | 4.12E-03 |
| cg06190053 | 9  | 70972125  | <i>PGM5</i>         | -1.072±0.298 | -0.784±0.586 | 4.13E-03 |
| cg22757447 | 18 | 22006316  | <i>IMPACT</i>       | -3.287±0.501 | -2.858±0.846 | 4.14E-03 |
| cg11939071 | 12 | 113494429 | <i>DTX1</i>         | -4.025±0.419 | -3.262±1.674 | 4.14E-03 |
| cg19717150 | 20 | 42984878  | <i>HNF4A</i>        | 0.616±0.281  | 0.226±0.839  | 4.15E-03 |
| cg12459502 | 18 | 60904237  | <i>BCL2</i>         | 1.671±0.304  | 1.378±0.599  | 4.17E-03 |
| cg08040428 | 8  | 18870913  | <i>PSD3</i>         | -3.318±0.307 | -3.081±0.45  | 4.17E-03 |
| cg26499286 | 17 | 39472498  | <i>KRTAP17-1</i>    | -0.768±0.304 | -1.113±0.724 | 4.17E-03 |
| cg06043042 | 10 | 71333202  | <i>NEUROG3</i>      | -4.309±0.361 | -3.785±1.134 | 4.17E-03 |
| cg02605634 | 20 | 44258384  | <i>WFDC10A</i>      | -2.918±0.338 | -2.603±0.639 | 4.20E-03 |
| cg19756611 | 13 | 72441705  | <i>DACH1</i>        | -3.249±0.43  | -2.85±0.808  | 4.22E-03 |
| cg17306637 | 6  | 155584709 | <i>CLDN20</i>       | 1.937±0.334  | 2.138±0.324  | 4.22E-03 |
| cg10716163 | 19 | 1355910   | <i>MUM1</i>         | -3.96±0.431  | -3.631±0.625 | 4.22E-03 |
| cg21402071 | 15 | 78933902  | <i>CHRNA4</i>       | -1.807±0.299 | -2.182±0.802 | 4.23E-03 |
| cg08859916 | 10 | 89624102  | <i>KLLN</i>         | -4.139±0.268 | -3.737±0.874 | 4.26E-03 |
| cg06235429 | 11 | 67373114  | <i>NDUFV1</i>       | 1.866±0.215  | 2.057±0.384  | 4.26E-03 |
| cg23444894 | 16 | 19297743  | <i>CLEC19A</i>      | 2.246±0.213  | 1.994±0.533  | 4.26E-03 |
| cg09991975 | 22 | 39096760  | <i>JOSD1</i>        | -4.617±0.338 | -4.425±0.288 | 4.27E-03 |
| cg03776060 | 9  | 133972575 | <i>AIF1L</i>        | -2.474±0.403 | -2.133±0.672 | 4.28E-03 |
| cg21030400 | 19 | 2052564   | <i>MKNK2</i>        | 0.211±0.371  | -0.105±0.626 | 4.30E-03 |
| cg14249872 | 1  | 233749672 | <i>KCNK1</i>        | -3.092±0.674 | -2.574±0.986 | 4.30E-03 |
| cg25473396 | 16 | 126819    | <i>MPG</i>          | -4.139±0.488 | -3.708±0.865 | 4.30E-03 |
| cg13823701 | 6  | 32078411  | <i>TNXB</i>         | 0.094±0.359  | 0.451±0.738  | 4.30E-03 |
| cg17252960 | 6  | 19837350  | <i>ID4</i>          | -2.369±0.467 | -1.797±1.221 | 4.31E-03 |
| cg00704310 | 19 | 34288103  | <i>KCTD15</i>       | -4.266±0.324 | -3.839±0.918 | 4.31E-03 |
| cg13477510 | 22 | 19700797  | <i>42618</i>        | 3.235±0.318  | 2.889±0.727  | 4.32E-03 |
| cg04691961 | 3  | 161091175 | <i>SPTSSB</i>       | 2.11±0.258   | 1.784±0.698  | 4.32E-03 |
| cg21640749 | 17 | 72709731  | <i>CD300LF</i>      | 1.54±0.356   | 1.14±0.842   | 4.32E-03 |
| cg13701273 | 4  | 66535780  | <i>LOC100144602</i> | -3.286±0.428 | -2.848±0.911 | 4.32E-03 |
| cg12293634 | 2  | 101924667 | <i>RNF149</i>       | -5.486±0.508 | -5.82±0.584  | 4.32E-03 |
| cg11393453 | 18 | 30050326  | <i>GAREM</i>        | -4.614±0.616 | -4.174±0.811 | 4.33E-03 |
| cg14841875 | 1  | 116916411 | <i>ATP1A1</i>       | -3.75±0.527  | -3.438±0.497 | 4.33E-03 |
| cg09799156 | 1  | 45253079  | <i>BEST4</i>        | 4.031±0.313  | 3.814±0.393  | 4.34E-03 |
| cg04637372 | 1  | 20617456  | <i>VWA5B1</i>       | 0.499±0.273  | 0.944±0.975  | 4.34E-03 |
| cg24975222 | 3  | 45187717  | <i>CDCP1</i>        | -4.157±0.727 | -3.628±0.983 | 4.34E-03 |
| cg07965823 | 14 | 77964712  | <i>ISM2</i>         | -3.267±0.372 | -2.691±1.258 | 4.35E-03 |
| cg15674432 | 6  | 35992082  | <i>SLC26A8</i>      | -1.405±0.233 | -1.016±0.855 | 4.35E-03 |
| cg06630241 | 12 | 93967711  | <i>SOC2</i>         | -0.533±0.29  | -0.097±0.95  | 4.37E-03 |
| cg02959669 | 19 | 58459358  | <i>ZNF256</i>       | -4.523±0.431 | -4.117±0.827 | 4.37E-03 |
| cg02055483 | 11 | 66188019  | <i>NPAS4</i>        | -2.978±0.426 | -2.613±0.728 | 4.38E-03 |
| cg23214764 | 11 | 86511210  | <i>PRSS23</i>       | -3.207±0.544 | -2.758±0.884 | 4.38E-03 |
| cg22680812 | 15 | 43512998  | <i>EPB42</i>        | 2.593±0.247  | 2.344±0.517  | 4.38E-03 |
| cg14528319 | 19 | 14607713  | <i>GLPC1</i>        | 0.753±0.333  | 1.203±0.972  | 4.39E-03 |
| cg17699374 | 22 | 37403802  | <i>TEX33</i>        | -0.797±0.307 | -1.253±0.993 | 4.39E-03 |
| cg14450506 | 7  | 44614519  | <i>DDX56</i>        | 1.548±0.188  | 1.271±0.603  | 4.41E-03 |
| cg08955609 | 19 | 45409353  | <i>APOE</i>         | -4.097±0.326 | -3.786±0.638 | 4.41E-03 |
| cg15331039 | 6  | 80341283  | <i>SH3BGRL2</i>     | -5.647±0.774 | -5.167±0.804 | 4.42E-03 |
| cg23350274 | 14 | 68188663  | <i>RDH12</i>        | 1.923±0.275  | 1.658±0.544  | 4.42E-03 |
| cg24192663 | 1  | 161493011 | <i>HSPA6</i>        | 2.385±0.17   | 2.102±0.622  | 4.42E-03 |
| cg26646411 | 22 | 19841374  | <i>C22orf29</i>     | -0.647±0.22  | -0.924±0.595 | 4.43E-03 |
| cg18604842 | 22 | 21987190  | <i>CCDC116</i>      | 3.743±0.396  | 3.269±1.012  | 4.43E-03 |
| cg24715735 | 19 | 35531403  | <i>HPN</i>          | -0.265±0.276 | 0.159±0.926  | 4.44E-03 |
| cg09787254 | 16 | 74808678  | <i>FA2H</i>         | -4.89±0.48   | -5.179±0.47  | 4.45E-03 |
| cg12374431 | 2  | 71126953  | <i>VAX2</i>         | -4.289±0.347 | -3.724±1.243 | 4.45E-03 |
| cg20861607 | 15 | 32323114  | <i>CHRNA7</i>       | -3.732±0.293 | -3.335±0.861 | 4.45E-03 |
| cg11075556 | 7  | 117865112 | <i>ANKRD7</i>       | 2.179±0.243  | 1.855±0.702  | 4.45E-03 |
| cg11811840 | 2  | 234669166 | <i>UGT1A1</i>       | 1.95±0.3     | 1.647±0.629  | 4.46E-03 |
| cg05112299 | 19 | 14991491  | <i>ORTA17</i>       | -0.269±0.23  | -0.468±0.397 | 4.46E-03 |
| cg21341271 | 7  | 39605683  | <i>YAE1D1</i>       | -5.022±0.397 | -5.295±0.494 | 4.47E-03 |
| cg15262516 | 13 | 110958418 | <i>COL4A1</i>       | -1.414±0.2   | -1.226±0.385 | 4.47E-03 |
| cg15923513 | 2  | 160654168 | <i>CD302</i>        | -3.422±0.48  | -2.993±0.868 | 4.47E-03 |
| cg18055007 | 6  | 31698226  | <i>DDAH2</i>        | -1.815±0.443 | -1.195±1.349 | 4.48E-03 |

|            |    |           |                   |              |              |          |
|------------|----|-----------|-------------------|--------------|--------------|----------|
| cg24730207 | 9  | 130891743 | <i>PTGES2-AS1</i> | 4.143±0.286  | 3.845±0.624  | 4.50E-03 |
| cg20771670 | 1  | 201438018 | <i>PHLDA3</i>     | -4.303±0.575 | -3.892±0.762 | 4.50E-03 |
| cg22635155 | 11 | 72385075  | <i>PDE2A</i>      | -3.934±0.375 | -3.551±0.8   | 4.50E-03 |
| cg03986640 | 12 | 56848355  | <i>MIP</i>        | 2.028±0.264  | 1.755±0.571  | 4.50E-03 |
| cg25580018 | 9  | 136399808 | <i>ADAMTSL2</i>   | -5.2±0.531   | -4.607±1.256 | 4.50E-03 |
| cg27285599 | 17 | 80798023  | <i>ZNF750</i>     | 1.801±0.406  | 1.192±1.332  | 4.51E-03 |
| cg15952725 | 1  | 15783190  | <i>CELA2A</i>     | 2.279±0.21   | 2.085±0.395  | 4.51E-03 |
| cg26615830 | 4  | 4861330   | <i>MSX1</i>       | -4.899±0.753 | -4.029±1.853 | 4.51E-03 |
| cg03695693 | 19 | 3932959   | <i>NMRK2</i>      | -3.062±0.256 | -2.785±0.585 | 4.51E-03 |
| cg03633120 | 19 | 8387262   | <i>RPS28</i>      | -2.357±0.327 | -2.013±0.721 | 4.51E-03 |
| cg12507125 | 3  | 149375528 | <i>WWTR1</i>      | -4.74±0.629  | -4.361±0.62  | 4.51E-03 |
| cg09555879 | 19 | 42569956  | <i>GRIK5</i>      | 2.039±0.256  | 1.625±0.91   | 4.52E-03 |
| cg16689634 | 1  | 47489539  | <i>CYP4X1</i>     | -3.59±0.535  | -3.171±0.81  | 4.52E-03 |
| cg04992673 | 7  | 92848714  | <i>HEPACAM2</i>   | 2.858±0.27   | 2.528±0.708  | 4.53E-03 |
| cg05675373 | 1  | 110754257 | <i>KCNC4</i>      | -3.85±0.413  | -2.977±1.947 | 4.53E-03 |
| cg26143719 | 22 | 37584227  | <i>C1QTNF6</i>    | -0.06±0.279  | 0.237±0.624  | 4.53E-03 |
| cg24216701 | 5  | 149545928 | <i>CDX1</i>       | 3.56±0.347   | 3.174±0.82   | 4.54E-03 |
| cg07435592 | 3  | 98619796  | <i>DCBLD2</i>     | -3.105±0.399 | -2.832±0.497 | 4.54E-03 |
| cg19428336 | 4  | 187645448 | <i>FAT1</i>       | -3.301±0.528 | -2.869±0.85  | 4.55E-03 |
| cg23240895 | 22 | 45071884  | <i>PRR5</i>       | 1.933±0.19   | 1.627±0.673  | 4.55E-03 |
| cg14605021 | 8  | 16859754  | <i>FGF20</i>      | -2.216±0.404 | -1.885±0.653 | 4.56E-03 |
| cg21974239 | 22 | 50700478  | <i>MAPK12</i>     | -4.145±0.339 | -3.776±0.78  | 4.56E-03 |
| cg01617750 | 3  | 32279261  | <i>CMTM8</i>      | -0.348±0.455 | 0.139±1.026  | 4.56E-03 |
| cg09772154 | 10 | 123358284 | <i>FGFR2</i>      | -3.365±0.474 | -2.969±0.786 | 4.57E-03 |
| cg14236389 | 20 | 58631038  | <i>C20orf197</i>  | 0.198±0.221  | -0.193±0.866 | 4.60E-03 |
| cg12610744 | 12 | 53208762  | <i>KRT4</i>       | 0.408±0.222  | 0.062±0.76   | 4.60E-03 |
| cg27140220 | 8  | 79428434  | <i>PKIA</i>       | -4.546±0.301 | -3.922±1.394 | 4.60E-03 |
| cg25999867 | 11 | 134145940 | <i>GLB1L3</i>     | -4.692±0.457 | -3.974±1.581 | 4.63E-03 |
| cg09119967 | 20 | 9494838   | <i>LAMP5</i>      | -1.335±0.289 | -1.74±0.885  | 4.63E-03 |
| cg05558390 | 20 | 57415377  | <i>GNAS</i>       | -0.214±0.201 | 0.007±0.471  | 4.63E-03 |
| cg20300655 | 5  | 134303572 | <i>CATSPER3</i>   | 1.995±0.23   | 1.724±0.58   | 4.63E-03 |
| cg00729875 | 1  | 100111713 | <i>PALMD</i>      | -2.722±0.517 | -2.328±0.758 | 4.63E-03 |
| cg15591678 | 10 | 64134155  | <i>ZNF365</i>     | -5.096±0.653 | -4.369±1.544 | 4.63E-03 |
| cg10451565 | 19 | 47840131  | <i>C5AR2</i>      | -0.488±0.236 | -0.72±0.482  | 4.63E-03 |
| cg22734085 | 4  | 184020261 | <i>WWC2-AS2</i>   | -5.638±0.832 | -5.027±1.154 | 4.64E-03 |
| cg27044702 | 16 | 1290763   | <i>TPSAB1</i>     | 0.075±0.365  | -0.151±0.381 | 4.65E-03 |
| cg24612198 | 11 | 118175631 | <i>CD3E</i>       | 0.496±0.362  | 0.257±0.424  | 4.65E-03 |
| cg26709863 | 17 | 40976775  | <i>BECN1</i>      | 2.988±0.163  | 2.807±0.385  | 4.66E-03 |
| cg02614818 | 16 | 16318168  | <i>ABCC6</i>      | 2.679±0.229  | 2.441±0.499  | 4.67E-03 |
| cg12775613 | 3  | 88040034  | <i>HTR1F</i>      | 2.641±0.304  | 2.462±0.289  | 4.68E-03 |
| cg03608167 | 2  | 136875637 | <i>CXCR4</i>      | -5.687±0.431 | -5.057±1.382 | 4.68E-03 |
| cg22176895 | 1  | 214162039 | <i>PROX1</i>      | -3.726±0.407 | -3.247±1.027 | 4.68E-03 |
| cg06543018 | 3  | 139258822 | <i>RBP1</i>       | -3.752±0.21  | -3.364±0.865 | 4.68E-03 |
| cg15415507 | 1  | 16482553  | <i>EPHA2</i>      | -2.022±0.269 | -1.829±0.359 | 4.69E-03 |
| cg23727043 | 15 | 79104124  | <i>ADAMTS7</i>    | -3.183±0.322 | -2.793±0.839 | 4.69E-03 |
| cg06425515 | 4  | 100356035 | <i>ADH7</i>       | -0.01±0.303  | 0.271±0.579  | 4.71E-03 |
| cg17446142 | 5  | 132201483 | <i>UQCRQ</i>      | 3.056±0.323  | 2.761±0.603  | 4.71E-03 |
| cg25957967 | 1  | 55505148  | <i>PCSK9</i>      | -4.771±0.531 | -4.441±0.559 | 4.74E-03 |
| cg08570521 | 4  | 166794471 | <i>TLL1</i>       | -4.207±0.413 | -3.711±1.067 | 4.74E-03 |
| cg10014293 | 16 | 56703833  | <i>MT1H</i>       | -3.217±0.39  | -2.743±1.022 | 4.74E-03 |
| cg11460029 | 17 | 7608747   | <i>EFNB3</i>      | -3.872±0.299 | -3.513±0.774 | 4.74E-03 |
| cg01942127 | 3  | 53529259  | <i>CACNA1D</i>    | -3.46±0.408  | -3.04±0.883  | 4.74E-03 |
| cg01671575 | 1  | 230513566 | <i>PGBD5</i>      | 2.448±0.285  | 2.788±0.732  | 4.74E-03 |
| cg17229197 | 11 | 2542688   | <i>KCNQ1</i>      | 1.803±0.262  | 1.505±0.636  | 4.75E-03 |
| cg06810647 | 16 | 1665094   | <i>CRAMP1L</i>    | -1.5±0.4     | -1.039±0.986 | 4.75E-03 |
| cg08026144 | 9  | 78505312  | <i>PCSK5</i>      | -3.855±0.316 | -3.576±0.566 | 4.76E-03 |
| cg16345226 | 19 | 16771394  | <i>SMIM7</i>      | -2.772±0.348 | -3.005±0.419 | 4.76E-03 |
| cg03048535 | 12 | 109747100 | <i>FOXN4</i>      | -4.464±0.371 | -4.041±0.905 | 4.76E-03 |
| cg12371177 | 12 | 6419148   | <i>PLEKHG6</i>    | 3.831±0.233  | 3.556±0.591  | 4.76E-03 |
| cg02885771 | 6  | 144163654 | <i>LTV1</i>       | 0.375±0.258  | 0.762±0.851  | 4.76E-03 |
| cg00112517 | 17 | 37783011  | <i>PPP1R1B</i>    | -2.543±0.246 | -2.149±0.871 | 4.76E-03 |
| cg03914452 | 7  | 155464145 | <i>RBM33</i>      | 1.16±0.374   | 1.414±0.46   | 4.76E-03 |
| cg11722531 | 19 | 1449857   | <i>APC2</i>       | -3.635±0.279 | -3.267±0.8   | 4.77E-03 |
| cg15379858 | 8  | 19540466  | <i>CSGALNACT1</i> | 1.176±0.292  | 0.82±0.768   | 4.77E-03 |
| cg05924191 | 15 | 35279830  | <i>ZNF770</i>     | 1.082±0.314  | 0.854±0.432  | 4.79E-03 |
| cg20751395 | 11 | 2594153   | <i>KCNQ1</i>      | 2.696±0.177  | 2.43±0.588   | 4.82E-03 |
| cg18103150 | 11 | 6518907   | <i>DNHD1</i>      | 2.53±0.384   | 2.823±0.566  | 4.83E-03 |

|            |    |           |          |              |              |          |
|------------|----|-----------|----------|--------------|--------------|----------|
| cg24183958 | 7  | 50860173  | GRB10    | -4.472±0.512 | -4.02±0.92   | 4.83E-03 |
| cg14401897 | 19 | 1174667   | SBNO2    | 3.234±0.339  | 2.907±0.679  | 4.83E-03 |
| cg01344518 | 16 | 326728    | RGS11    | 0.781±0.162  | 1.002±0.484  | 4.85E-03 |
| cg20764656 | 14 | 65410479  | GPX2     | 1.197±0.35   | 0.803±0.842  | 4.85E-03 |
| cg11747499 | 12 | 109252653 | SSH1     | -3.294±0.476 | -2.907±0.768 | 4.86E-03 |
| cg02564523 | 7  | 102073539 | ORAI2    | -1.899±0.3   | -2.317±0.919 | 4.87E-03 |
| cg18931888 | 3  | 137851874 | A4GNT    | 2.506±0.291  | 2.234±0.564  | 4.89E-03 |
| cg15096140 | 2  | 192109731 | MYO1B    | -0.635±0.301 | -0.892±0.519 | 4.89E-03 |
| cg22732515 | 19 | 44031385  | ETHE1    | -3.207±0.385 | -2.982±0.363 | 4.90E-03 |
| cg24698622 | 8  | 30670597  | PPP2CB   | -3.475±0.365 | -3.788±0.632 | 4.91E-03 |
| cg27234090 | 11 | 119251854 | USP2     | -1.947±0.273 | -2.347±0.883 | 4.91E-03 |
| cg06074920 | 17 | 39539075  | KRT34    | 3.27±0.271   | 2.964±0.658  | 4.91E-03 |
| cg16935075 | 11 | 18062359  | TPH1     | 1.512±0.336  | 1.247±0.521  | 4.93E-03 |
| cg22833027 | 3  | 184098790 | CHRD     | -4.067±0.42  | -3.707±0.728 | 4.93E-03 |
| cg24315860 | 7  | 105029492 | SRPK2    | -4.542±0.494 | -4.21±0.602  | 4.94E-03 |
| cg04386405 | 19 | 53141394  | ZNF83    | -4.607±0.416 | -4.129±1.028 | 4.94E-03 |
| cg25852715 | 11 | 3121024   | OSBPL5   | 3.732±0.255  | 3.561±0.311  | 4.95E-03 |
| cg00226923 | 6  | 36972027  | FGD2     | 1.433±0.341  | 1.803±0.787  | 4.96E-03 |
| cg09547777 | 1  | 160160232 | CASQ1    | 2.87±0.285   | 2.566±0.647  | 4.96E-03 |
| cg01155039 | 14 | 103389814 | AMN      | -2.21±0.306  | -1.824±0.841 | 4.97E-03 |
| cg03887787 | 11 | 65647532  | CTSW     | 0.353±0.374  | 0.017±0.691  | 4.97E-03 |
| cg15352829 | 14 | 105391018 | PLD4     | 1.689±0.432  | 1.304±0.789  | 4.98E-03 |
| cg15092802 | 9  | 138438052 | OBP2A    | 1.753±0.259  | 1.483±0.574  | 4.98E-03 |
| cg01013324 | 17 | 7608068   | EFNB3    | -3.942±0.472 | -3.484±0.956 | 4.99E-03 |
| cg21265783 | 7  | 73704324  | CLIP2    | -4.531±0.248 | -4.285±0.517 | 4.99E-03 |
| cg10908369 | 2  | 68547256  | CNRIP1   | -4.043±0.415 | -3.552±1.062 | 5.00E-03 |
| cg25599242 | 11 | 63304337  | RARRES3  | -3.569±0.284 | -3.279±0.614 | 5.00E-03 |
| cg17870792 | 1  | 82266841  | LPHN2    | -4.382±0.451 | -3.965±0.862 | 5.01E-03 |
| cg22851319 | 20 | 39765363  | PLCG1    | -3.64±0.283  | -3.374±0.55  | 5.01E-03 |
| cg15514848 | 1  | 171217555 | FMO1     | 0.073±0.326  | 0.408±0.708  | 5.01E-03 |
| cg27291231 | 9  | 140081916 | SSNA1    | 1.948±0.284  | 1.619±0.711  | 5.05E-03 |
| cg24813212 | 1  | 36549726  | TEKT2    | -5.182±0.623 | -4.534±1.376 | 5.05E-03 |
| cg12991341 | 8  | 109800287 | TMEM74   | 3.151±0.248  | 2.914±0.493  | 5.07E-03 |
| cg26029902 | 20 | 56884425  | PPP4R1L  | -2.363±0.417 | -1.868±1.071 | 5.07E-03 |
| cg22836153 | 5  | 121412702 | LOX      | -4.806±0.529 | -4.442±0.672 | 5.07E-03 |
| cg08453096 | 2  | 44065893  | ABCG5    | 1.827±0.269  | 1.552±0.581  | 5.07E-03 |
| cg24789424 | 3  | 197300143 | BDH1     | 2.515±0.229  | 2.207±0.678  | 5.07E-03 |
| cg23410627 | 10 | 90966807  | CH25H    | -4.288±0.49  | -3.483±1.799 | 5.09E-03 |
| cg17428423 | 16 | 30022132  | DOC2A    | -3.165±0.202 | -2.919±0.533 | 5.09E-03 |
| cg24046110 | 8  | 143859143 | LYNX1    | -4.149±0.609 | -3.753±0.708 | 5.09E-03 |
| cg22444610 | 2  | 201375087 | KCTD18   | -3.687±0.303 | -3.896±0.389 | 5.10E-03 |
| cg07810156 | 1  | 47655682  | PDZK1IP1 | 0.93±0.285   | 0.556±0.822  | 5.10E-03 |
| cg17788682 | 15 | 80697029  | ARNT2    | -4.277±1.072 | -3.436±1.658 | 5.10E-03 |
| cg04719766 | 11 | 2542580   | KCNQ1    | 2.399±0.212  | 2.159±0.517  | 5.10E-03 |
| cg07315298 | 9  | 70430360  | FOXO4L4  | 3.861±0.383  | 3.622±0.413  | 5.11E-03 |
| cg00931491 | 16 | 28608288  | SULT1A2  | -1.085±0.305 | -0.808±0.574 | 5.11E-03 |
| cg20195812 | 2  | 192015677 | STAT4    | -4.192±0.343 | -4.51±0.661  | 5.12E-03 |
| cg24357161 | 17 | 9810114   | RCVRN    | -0.048±0.198 | 0.142±0.398  | 5.12E-03 |
| cg18081313 | 12 | 132378192 | ULK1     | 2.207±0.253  | 2.467±0.552  | 5.13E-03 |
| cg03109047 | 9  | 140032686 | GRIN1    | -3.972±0.186 | -3.631±0.768 | 5.14E-03 |
| cg10845200 | 10 | 135150485 | CALY     | -6.071±0.828 | -5.26±1.706  | 5.15E-03 |
| cg08711674 | 19 | 50381878  | AKT1S1   | 0.266±0.208  | 0.489±0.477  | 5.15E-03 |
| cg17226343 | 19 | 2720776   | DIRAS1   | -3.892±0.448 | -3.511±0.775 | 5.15E-03 |
| cg27519373 | 19 | 57350292  | PEG3     | 0.873±0.235  | 0.619±0.543  | 5.15E-03 |
| cg12040555 | 10 | 131321830 | MGMT     | 3.127±0.388  | 2.85±0.524   | 5.16E-03 |
| cg15459773 | 1  | 231472445 | EXOC8    | 2.273±0.281  | 1.858±0.92   | 5.16E-03 |
| cg26718585 | 2  | 128176454 | PROC     | 2.017±0.21   | 1.82±0.41    | 5.16E-03 |
| cg17892556 | 19 | 12267464  | ZNF625   | -4.087±0.698 | -3.453±1.312 | 5.16E-03 |
| cg16698623 | 10 | 131412968 | MGMT     | 2.423±0.364  | 2.105±0.653  | 5.18E-03 |
| cg06458239 | 19 | 58038573  | ZNF549   | -1.9±0.344   | -2.326±0.931 | 5.18E-03 |
| cg22700017 | 3  | 183979894 | CAMK2N2  | -3.948±0.384 | -4.196±0.443 | 5.19E-03 |
| cg21615171 | 3  | 38307564  | SLC22A13 | 2.821±0.205  | 2.682±0.257  | 5.21E-03 |
| cg22189019 | 19 | 640346    | FGF22    | 0.423±0.314  | 0.019±0.888  | 5.21E-03 |
| cg17854440 | 4  | 111397581 | ENPEP    | 0.292±0.237  | 0.652±0.803  | 5.23E-03 |
| cg11692477 | 2  | 190445477 | SLC40A1  | -5.399±0.644 | -4.954±0.833 | 5.24E-03 |
| cg15240064 | 7  | 6746837   | ZNF12    | -3.037±0.444 | -3.34±0.562  | 5.25E-03 |
| cg11012046 | 11 | 134202336 | GLB1L2   | -4.581±0.619 | -4.181±0.715 | 5.25E-03 |

|            |    |           |          |              |              |          |
|------------|----|-----------|----------|--------------|--------------|----------|
| cg02149446 | 19 | 47812519  | C5AR1    | -1.01±0.293  | -0.665±0.75  | 5.25E-03 |
| cg16154416 | 15 | 79382767  | RASGRF1  | -1.912±0.411 | -1.514±0.839 | 5.26E-03 |
| cg08707819 | 14 | 103059391 | RCOR1    | -1.308±0.289 | -1.132±0.303 | 5.27E-03 |
| cg16465769 | 6  | 43266151  | SLC22A7  | 1.895±0.18   | 1.63±0.59    | 5.27E-03 |
| cg02029926 | 4  | 74734874  | CXCL1    | -3.515±0.425 | -3.056±0.986 | 5.27E-03 |
| cg03257423 | 19 | 44860820  | ZFP112   | -2.25±0.462  | -1.913±0.649 | 5.27E-03 |
| cg24030627 | 19 | 40440416  | FCGBP    | 2.563±0.325  | 2.289±0.558  | 5.27E-03 |
| cg27472295 | 6  | 83073619  | TPBG     | -4.094±0.369 | -3.816±0.542 | 5.28E-03 |
| cg17155167 | 1  | 155881046 | RIT1     | -3.3±0.422   | -3.558±0.441 | 5.32E-03 |
| cg11378686 | 6  | 43336278  | ZNF318   | -3.366±0.394 | -2.975±0.829 | 5.32E-03 |
| cg00338702 | 12 | 133463694 | CHFR     | -3.631±0.328 | -3.235±0.866 | 5.33E-03 |
| cg17869167 | 2  | 102979704 | IL18R1   | 2.614±0.289  | 2.35±0.551   | 5.34E-03 |
| cg26096837 | 11 | 69519974  | FGF19    | -1.903±0.302 | -1.354±1.239 | 5.34E-03 |
| cg09721047 | 2  | 68962012  | ARHGAP25 | 0.016±0.432  | -0.441±0.98  | 5.34E-03 |
| cg19428417 | 16 | 66959729  | RRAD     | -1.412±0.289 | -1.121±0.621 | 5.35E-03 |
| cg20484002 | 17 | 38956500  | KRT28    | 1.535±0.344  | 1.2±0.71     | 5.35E-03 |
| cg26545162 | 17 | 74075092  | ZACN     | 0.202±0.318  | -0.123±0.692 | 5.36E-03 |
| cg16005224 | 12 | 101603174 | SLC5A8   | -0.249±0.238 | 0.035±0.619  | 5.36E-03 |
| cg02548238 | 5  | 121413050 | LOX      | -4.119±0.463 | -3.718±0.823 | 5.37E-03 |
| cg19895197 | 17 | 37887061  | MIEN1    | -4.397±0.286 | -4.635±0.483 | 5.37E-03 |
| cg27126442 | 4  | 106473806 | ARHGEF38 | -0.053±0.345 | -0.463±0.895 | 5.38E-03 |
| cg10071275 | 20 | 62795830  | MYT1     | 1.611±0.264  | 1.248±0.805  | 5.38E-03 |
| cg03439703 | 11 | 14664991  | PSMA1    | -1.468±0.271 | -1.107±0.799 | 5.38E-03 |
| cg01797527 | 20 | 6749480   | BMP2     | -4.222±0.649 | -3.722±0.989 | 5.39E-03 |
| cg09190408 | 11 | 67170610  | TBC1D10C | 1.852±0.295  | 1.596±0.525  | 5.39E-03 |
| cg16218424 | 12 | 22198973  | CMAS     | -3.2±0.314   | -3.436±0.461 | 5.42E-03 |
| cg18370227 | 17 | 39507261  | KRT33A   | 2.789±0.228  | 2.571±0.46   | 5.43E-03 |
| cg03611555 | 14 | 37641600  | SLC25A21 | -4.283±0.803 | -3.726±1.05  | 5.45E-03 |
| cg19033555 | 8  | 6736385   | DEFB1    | 1.353±0.23   | 1.049±0.674  | 5.45E-03 |
| cg10534672 | 5  | 159797275 | C1QTNF2  | -3.355±0.404 | -3.061±0.568 | 5.45E-03 |
| cg20833786 | 11 | 18141393  | MRGPRX3  | 0.276±0.28   | 0.014±0.55   | 5.46E-03 |
| cg21917349 | 15 | 29213860  | APBA2    | 1.568±0.225  | 1.315±0.55   | 5.46E-03 |
| cg14566624 | 1  | 6321582   | GPR153   | -2.852±0.414 | -2.52±0.668  | 5.46E-03 |
| cg05226008 | 8  | 13372132  | DLC1     | -1.346±0.331 | -1.782±0.965 | 5.46E-03 |
| cg22129364 | 1  | 53067894  | GPX7     | -4.249±0.322 | -3.618±1.432 | 5.47E-03 |
| cg15720535 | 9  | 139582585 | AGPAT2   | -0.369±0.372 | -0.752±0.821 | 5.49E-03 |
| cg11027570 | 3  | 139258431 | RBP1     | -3.63±0.367  | -3.16±1.038  | 5.50E-03 |
| cg10976172 | 16 | 30597528  | ZNF785   | -3.667±0.225 | -3.445±0.473 | 5.50E-03 |
| cg18320336 | 7  | 89783848  | STEAP1   | -2.735±0.38  | -2.3±0.947   | 5.51E-03 |
| cg19136717 | 15 | 72766740  | ARIH1    | -3.62±0.363  | -3.403±0.368 | 5.51E-03 |
| cg14203179 | 20 | 57430663  | GNAS     | 0.581±0.154  | 0.793±0.473  | 5.52E-03 |
| cg23154064 | 3  | 56699146  | FAM208A  | 1.025±0.232  | 0.878±0.263  | 5.53E-03 |
| cg14437986 | 6  | 31691035  | C6orf25  | 0.278±0.359  | -0.08±0.762  | 5.54E-03 |
| cg03112869 | 3  | 48413769  | FBXW12   | 2.401±0.227  | 2.217±0.373  | 5.55E-03 |
| cg22512531 | 11 | 122709551 | CRTAM    | 2.045±0.318  | 1.79±0.513   | 5.55E-03 |
| cg06433658 | 1  | 150979092 | FAM63A   | -4.183±0.415 | -3.862±0.637 | 5.55E-03 |
| cg05275752 | 2  | 38892887  | GALM     | -3.064±0.536 | -2.672±0.76  | 5.57E-03 |
| cg19258973 | 12 | 52714891  | KRT83    | 1.042±0.244  | 1.291±0.533  | 5.57E-03 |
| cg15105660 | 3  | 190039935 | CLDN1    | -2.883±0.31  | -3.187±0.646 | 5.57E-03 |
| cg19399532 | 1  | 178512495 | C1orf220 | -1.308±0.408 | -1.712±0.862 | 5.58E-03 |
| cg11835197 | 1  | 36038514  | TFAP2E   | 0.383±0.249  | 0.654±0.587  | 5.59E-03 |
| cg14088161 | 7  | 100255043 | ACTL6B   | 0.703±0.257  | 0.377±0.72   | 5.59E-03 |
| cg04473302 | 7  | 107301217 | SLC26A4  | -4.712±0.465 | -4.196±1.122 | 5.60E-03 |
| cg08775793 | 22 | 36648692  | APOL1    | 2.735±0.173  | 2.501±0.522  | 5.61E-03 |
| cg01429321 | 5  | 121413797 | LOX      | -4.094±0.438 | -3.791±0.573 | 5.62E-03 |
| cg07117700 | 17 | 61903327  | PSMC5    | 2.185±0.234  | 2.435±0.54   | 5.62E-03 |
| cg15528736 | 19 | 50015780  | FCGRT    | -1.536±0.43  | -1.104±0.923 | 5.62E-03 |
| cg14391855 | 11 | 66104174  | RIN1     | -2.855±0.387 | -3.247±0.84  | 5.63E-03 |
| cg12167239 | 22 | 19166808  | SLC25A1  | -5.264±0.574 | -5.594±0.536 | 5.63E-03 |
| cg14865868 | 2  | 12856040  | TRIB2    | -2.595±0.42  | -2.278±0.625 | 5.65E-03 |
| cg23838531 | 17 | 15902837  | TTC19    | -4.659±0.437 | -4.397±0.447 | 5.66E-03 |
| cg10194829 | 8  | 21900177  | FGF17    | -2.232±0.36  | -1.967±0.518 | 5.67E-03 |
| cg27256309 | 19 | 49220485  | MAMSTR   | -0.154±0.293 | 0.222±0.834  | 5.70E-03 |
| cg04878727 | 6  | 28317483  | ZKSCAN3  | -3.867±0.379 | -3.466±0.865 | 5.71E-03 |
| cg03012280 | 15 | 41098255  | ZFYVE19  | 2.116±0.321  | 1.844±0.561  | 5.72E-03 |
| cg09450238 | 14 | 105715783 | BRF1     | -0.768±0.465 | -0.295±1.017 | 5.72E-03 |
| cg23440155 | 1  | 47264601  | CYP4B1   | -1.033±0.281 | -0.706±0.718 | 5.73E-03 |

|            |    |           |              |              |              |          |
|------------|----|-----------|--------------|--------------|--------------|----------|
| cg13060997 | 13 | 37006611  | CCNA1        | -4.784±0.582 | -4.077±1.562 | 5.73E-03 |
| cg03751414 | 7  | 100797809 | AP1S1        | -3.654±0.424 | -3.904±0.419 | 5.75E-03 |
| cg11572744 | 5  | 146832933 | DPYSL3       | -4.633±0.614 | -4.243±0.698 | 5.75E-03 |
| cg27236973 | 17 | 39781997  | KRT17        | -1.742±0.36  | -2.057±0.653 | 5.76E-03 |
| cg02154186 | 8  | 26371353  | PNMA2        | -2.343±0.496 | -1.897±0.935 | 5.76E-03 |
| cg07039113 | 1  | 153329013 | S100A9       | 2.104±0.302  | 1.814±0.616  | 5.76E-03 |
| cg19256236 | 12 | 49932216  | KCNH3        | -2.989±0.26  | -2.689±0.66  | 5.77E-03 |
| cg02347487 | 11 | 7059103   | NLRP14       | -0.671±0.274 | -1.02±0.777  | 5.80E-03 |
| cg01747665 | 16 | 1843424   | IGFALS       | 1.334±0.228  | 1.57±0.51    | 5.81E-03 |
| cg06894812 | 5  | 112630225 | MCC          | -4.655±0.311 | -4.297±0.788 | 5.86E-03 |
| cg17010112 | 4  | 77227123  | STBD1        | -3.504±0.501 | -3.163±0.642 | 5.87E-03 |
| cg24922992 | 6  | 43265547  | SLC22A7      | -0.249±0.194 | -0.003±0.547 | 5.90E-03 |
| cg06980460 | 11 | 49230548  | FOLH1        | 1.308±0.402  | 1.68±0.785   | 5.91E-03 |
| cg09624565 | 22 | 37256900  | NCF4         | 0.749±0.261  | 0.423±0.723  | 5.91E-03 |
| cg13474750 | 22 | 38037408  | SH3BP1       | 3.32±0.361   | 3.066±0.488  | 5.93E-03 |
| cg25059899 | 18 | 60904328  | BCL2         | 2.231±0.327  | 1.923±0.654  | 5.93E-03 |
| cg05389024 | 2  | 170366131 | KLHL41       | -0.582±0.306 | -0.308±0.575 | 5.94E-03 |
| cg11674404 | 4  | 176987359 | WDR17        | -4.155±0.389 | -3.708±0.984 | 5.95E-03 |
| cg16075940 | 6  | 109557698 | LOC100996634 | 2.084±0.311  | 1.724±0.794  | 5.96E-03 |
| cg13181019 | 10 | 28571582  | MPP7         | 2.011±0.21   | 1.832±0.371  | 5.96E-03 |
| cg20368904 | 14 | 103593088 | TNFAIP2      | 1.233±0.284  | 1.721±1.113  | 5.97E-03 |
| cg10663017 | 1  | 159750305 | DUSP23       | -4.209±0.368 | -4.512±0.621 | 5.98E-03 |
| cg02000005 | 14 | 105953642 | CRIP1        | -3.353±0.302 | -3.769±0.933 | 5.98E-03 |
| cg23065097 | 2  | 24271827  | FKBP1B       | -0.048±0.35  | -0.412±0.788 | 5.98E-03 |
| cg22560190 | 12 | 41086198  | CNTN1        | -4.074±0.289 | -3.805±0.573 | 5.99E-03 |
| cg19393006 | 9  | 135820767 | TSC1         | -0.227±0.205 | -0.518±0.656 | 6.00E-03 |
| cg26884581 | 11 | 64527414  | PYGM         | -0.946±0.339 | -0.49±1.023  | 6.00E-03 |
| cg09426307 | 22 | 30868048  | SEC14L3      | -0.033±0.22  | -0.316±0.63  | 6.00E-03 |
| cg25477928 | 2  | 24583610  | ITSN2        | -3.649±0.334 | -3.844±0.328 | 6.03E-03 |
| cg23989635 | 16 | 68771203  | CDH1         | -2.894±0.437 | -2.527±0.76  | 6.05E-03 |
| cg24329717 | 11 | 57106093  | P2RX3        | 3.554±0.305  | 3.337±0.421  | 6.05E-03 |
| cg12118437 | 9  | 136283820 | REXO4        | 0.877±0.154  | 0.63±0.561   | 6.05E-03 |
| cg14721213 | 1  | 171154612 | FMO2         | 0.045±0.349  | 0.397±0.762  | 6.05E-03 |
| cg12955583 | 10 | 134974048 | KNDC1        | -5.109±0.811 | -4.531±1.121 | 6.06E-03 |
| cg18321354 | 7  | 3084516   | CARD11       | 1.767±0.228  | 2.001±0.509  | 6.08E-03 |
| cg02982690 | 8  | 65492846  | BHLHE22      | -4.959±0.477 | -4.316±1.445 | 6.09E-03 |
| cg16124337 | 6  | 90062879  | UBE2J1       | -4.414±0.319 | -4.625±0.391 | 6.10E-03 |
| cg21906716 | 1  | 3579978   | TP73         | 3.287±0.319  | 2.873±0.926  | 6.10E-03 |
| cg24541550 | 11 | 10715360  | MRVI1        | 0.842±0.22   | 1.06±0.469   | 6.11E-03 |
| cg18452600 | 8  | 9911543   | MSRA         | -3.605±0.341 | -3.312±0.611 | 6.11E-03 |
| cg02131967 | 17 | 61554106  | ACE          | -5.269±0.624 | -4.615±1.426 | 6.12E-03 |
| cg20641660 | 11 | 76155487  | C11orf30     | -3.77±0.435  | -4.037±0.471 | 6.14E-03 |
| cg12228611 | 22 | 22020169  | PPIL2        | -3.383±0.235 | -3.519±0.227 | 6.17E-03 |
| cg14851685 | 19 | 15618559  | CYP4F22      | 0.842±0.399  | 1.239±0.858  | 6.17E-03 |
| cg10159529 | 3  | 3152530   | IL5RA        | 1.286±0.273  | 0.946±0.76   | 6.18E-03 |
| cg14587868 | 14 | 24732737  | TGM1         | 0.914±0.215  | 1.102±0.396  | 6.19E-03 |
| cg15822411 | 11 | 85566560  | CCDC83       | 2.122±0.179  | 1.845±0.629  | 6.20E-03 |
| cg15301700 | 8  | 145560531 | SCRT1        | -3.7±0.29    | -3.37±0.731  | 6.22E-03 |
| cg03668539 | 19 | 7553324   | PEX11G       | 2.139±0.265  | 1.769±0.838  | 6.25E-03 |
| cg15842884 | 20 | 5591925   | GPCPD1       | -5.351±0.445 | -5.617±0.462 | 6.25E-03 |
| cg01958189 | 20 | 68396     | DEFB125      | 0.466±0.304  | 0.106±0.8    | 6.25E-03 |
| cg09450020 | 7  | 89841435  | STEAP2       | -4.943±0.781 | -4.356±1.174 | 6.25E-03 |
| cg12422683 | 11 | 12132611  | MICAL2       | -4.38±0.47   | -4.063±0.601 | 6.25E-03 |
| cg01100796 | 1  | 53662040  | CPT2         | -3.097±0.601 | -2.702±0.736 | 6.26E-03 |
| cg16250754 | 5  | 40841579  | CARD6        | -2.016±0.385 | -2.328±0.635 | 6.26E-03 |
| cg17509612 | 9  | 132598774 | USP20        | -2.101±0.291 | -1.713±0.874 | 6.26E-03 |
| cg20176648 | 7  | 30951064  | AQP1         | -1.05±0.238  | -0.749±0.675 | 6.28E-03 |
| cg02397514 | 1  | 935139    | HES4         | -4.821±0.732 | -4.315±0.974 | 6.30E-03 |
| cg27553637 | 22 | 37957154  | CDC42EP1     | -4.582±0.48  | -4.249±0.644 | 6.30E-03 |
| cg18912933 | 16 | 15031749  | NPIPA1       | 1.477±0.137  | 1.317±0.355  | 6.30E-03 |
| cg05473677 | 3  | 195943713 | SLC51A       | -0.158±0.485 | 0.283±0.937  | 6.31E-03 |
| cg23588759 | 6  | 88039288  | GJB7         | 2.1±0.291    | 1.877±0.452  | 6.32E-03 |
| cg14847688 | 14 | 59932113  | GPR135       | -5.335±0.645 | -4.667±1.458 | 6.33E-03 |
| cg26287988 | 21 | 11098970  | BAGE         | 2.743±0.167  | 2.586±0.336  | 6.33E-03 |
| cg17918239 | 1  | 200379718 | ZNF281       | -2.726±0.548 | -3.054±0.558 | 6.34E-03 |
| cg15319457 | 2  | 239148132 | HES6         | -4.691±0.573 | -4.167±1.116 | 6.35E-03 |
| cg03160637 | 11 | 61101089  | DDB1         | -4.344±0.483 | -4.645±0.543 | 6.35E-03 |

|            |    |           |              |              |              |          |
|------------|----|-----------|--------------|--------------|--------------|----------|
| cg00895324 | 21 | 41238517  | PCP4         | 1.069±0.253  | 0.736±0.75   | 6.35E-03 |
| cg17639046 | 17 | 14204027  | HS3ST3B1     | -3.163±0.219 | -2.76±0.93   | 6.36E-03 |
| cg17813891 | 14 | 100532036 | EVL          | 0.721±0.351  | 0.359±0.79   | 6.38E-03 |
| cg20907471 | 20 | 21679525  | 0            | -2.34±0.252  | -2.107±0.498 | 6.38E-03 |
| cg04872689 | 2  | 68592375  | PLEK         | 0.627±0.3    | 0.246±0.855  | 6.38E-03 |
| cg06475327 | 19 | 43099482  | CEACAM8      | 3.862±0.242  | 3.557±0.685  | 6.40E-03 |
| cg00152644 | 1  | 153068236 | SPRR2E       | 1.974±0.233  | 1.53±1.027   | 6.41E-03 |
| cg16101800 | 20 | 56136569  | PCK1         | 1.478±0.288  | 1.159±0.704  | 6.43E-03 |
| cg00945862 | 2  | 74570240  | SLC4A5       | 2.688±0.259  | 2.444±0.524  | 6.43E-03 |
| cg07463059 | 1  | 158979810 | IFI16        | -3.561±0.448 | -3.955±0.836 | 6.45E-03 |
| cg13744194 | 5  | 68788087  | OCLN         | -2.335±0.323 | -2.099±0.468 | 6.45E-03 |
| cg09276363 | 1  | 112531488 | KCND3        | -1.198±0.241 | -0.886±0.704 | 6.48E-03 |
| cg03606258 | 20 | 57426935  | GNAS-AS1     | 0.816±0.126  | 1.005±0.43   | 6.50E-03 |
| cg18292711 | 10 | 32346148  | KIF5B        | 1.341±0.285  | 1.086±0.542  | 6.54E-03 |
| cg23278885 | 20 | 2361431   | TGM6         | 1.406±0.215  | 1.043±0.835  | 6.55E-03 |
| cg01410472 | 8  | 75896975  | CRISPLD1     | -3.424±0.535 | -2.851±1.266 | 6.61E-03 |
| cg18589624 | 7  | 30791294  | INMT-FAM188B | 1.551±0.161  | 1.705±0.334  | 6.62E-03 |
| cg02873524 | 9  | 118916493 | PAPPA        | -3.856±0.655 | -3.354±1.021 | 6.63E-03 |
| cg19123107 | 9  | 136324577 | CACFD1       | -3.217±0.384 | -2.924±0.595 | 6.63E-03 |
| cg12591323 | 2  | 217278609 | SMARCA1      | 3.379±0.236  | 3.228±0.28   | 6.64E-03 |
| cg08338368 | 12 | 68620926  | IL26         | 2.328±0.252  | 2.026±0.678  | 6.67E-03 |
| cg11483915 | 2  | 190446080 | SLC40A1      | -4.147±0.426 | -3.851±0.577 | 6.67E-03 |
| cg12711530 | 2  | 69099285  | BMP10        | 1.755±0.252  | 1.391±0.832  | 6.68E-03 |
| cg02780295 | 5  | 140855463 | PCDHGC3      | -4.635±0.428 | -4.069±1.287 | 6.68E-03 |
| cg05624932 | 8  | 75897310  | CRISPLD1     | -3.526±0.394 | -3.039±1.098 | 6.69E-03 |
| cg26781150 | 1  | 45792542  | HPDL         | -5.106±0.39  | -4.604±1.137 | 6.72E-03 |
| cg14258236 | 6  | 29323330  | OR5V1        | 2.235±0.255  | 1.832±0.928  | 6.72E-03 |
| cg11219178 | 11 | 3120949   | OSBPL5       | 0.898±0.168  | 1.076±0.394  | 6.72E-03 |
| cg08946117 | 2  | 132560175 | C2orf27B     | -0.163±0.219 | -0.006±0.311 | 6.73E-03 |
| cg04590978 | 10 | 97802941  | CCNJ         | -4.126±0.434 | -3.851±0.508 | 6.74E-03 |
| cg05301852 | 2  | 88427827  | FABP1        | 1.27±0.257   | 0.984±0.637  | 6.74E-03 |
| cg25217765 | 6  | 90604299  | GJA10        | 1.818±0.354  | 1.529±0.603  | 6.82E-03 |
| cg09163021 | 11 | 47470768  | RAPSN        | 0.784±0.199  | 1±0.479      | 6.83E-03 |
| cg14688272 | 17 | 80673958  | FN3KRP       | -1.584±0.326 | -1.293±0.623 | 6.84E-03 |
| cg19612574 | 10 | 49608952  | MAPK8        | 2.586±0.232  | 2.355±0.506  | 6.84E-03 |
| cg14693893 | 14 | 102430593 | DYNC1H1      | -4.523±0.375 | -4.301±0.389 | 6.85E-03 |
| cg18849169 | 5  | 150399781 | GPX3         | 0.83±0.172   | 0.54±0.673   | 6.85E-03 |
| cg22082462 | 14 | 24540415  | CPNE6        | 1.33±0.375   | 0.871±1.035  | 6.85E-03 |
| cg03149130 | 9  | 93404977  | DIRAS2       | -3.664±0.286 | -3.376±0.633 | 6.85E-03 |
| cg06043114 | 1  | 115632455 | TSPAN2       | -4.511±0.397 | -4.094±0.922 | 6.85E-03 |
| cg02901679 | 1  | 206945999 | IL10         | 1.104±0.349  | 0.705±0.894  | 6.87E-03 |
| cg06150468 | 1  | 212874085 | BATF3        | -4.366±0.343 | -3.922±1.01  | 6.88E-03 |
| cg14563260 | 9  | 113801320 | LPAR1        | -3.332±0.548 | -2.826±1.093 | 6.88E-03 |
| cg18503260 | 8  | 86157410  | CA13         | -3.519±0.445 | -3.198±0.642 | 6.88E-03 |
| cg02838492 | 9  | 116861288 | KIF12        | -0.378±0.301 | -0.022±0.802 | 6.93E-03 |
| cg23829949 | 1  | 244214679 | ZBTB18       | 0.236±0.337  | 0.752±1.19   | 6.93E-03 |
| cg22854223 | 11 | 44586505  | CD82         | -3.108±0.453 | -2.707±0.856 | 6.95E-03 |
| cg03156547 | 14 | 23525003  | CDH24        | 0.624±0.155  | 0.448±0.395  | 6.96E-03 |
| cg22430790 | 14 | 52117833  | FRMD6-AS1    | -2.758±0.213 | -2.524±0.522 | 6.97E-03 |
| cg22024657 | 7  | 122839955 | SLC13A1      | 2.907±0.452  | 2.549±0.741  | 6.99E-03 |
| cg24499411 | 7  | 47580247  | TNS3         | 1.226±0.357  | 1.497±0.553  | 7.00E-03 |
| cg18412984 | 14 | 102604722 | HSP90AA1     | 1.223±0.391  | 1.469±0.444  | 7.00E-03 |
| cg13565215 | 11 | 117668336 | DSCAML1      | -0.906±0.286 | -0.613±0.649 | 7.01E-03 |
| cg21700166 | 14 | 91720227  | GPR68        | -3.062±0.358 | -3.438±0.834 | 7.01E-03 |
| cg03614513 | 1  | 115632038 | TSPAN2       | -3.876±0.307 | -3.37±1.173  | 7.03E-03 |
| cg07845392 | 17 | 79678158  | SLC25A10     | -0.473±0.197 | -0.147±0.757 | 7.04E-03 |
| cg17838765 | 11 | 43902310  | ALKBH3       | -6.187±0.829 | -5.672±0.945 | 7.04E-03 |
| cg19756068 | 19 | 41497222  | CYP2B6       | 0.946±0.243  | 0.687±0.575  | 7.04E-03 |
| cg09038676 | 11 | 67351608  | GSTP1        | -4.47±0.394  | -4.066±0.893 | 7.04E-03 |
| cg14189571 | 4  | 188916943 | ZFP42        | -1.119±0.387 | -0.648±1.066 | 7.04E-03 |
| cg21421701 | 1  | 212872679 | BATF3        | -5.06±0.466  | -5.336±0.488 | 7.05E-03 |
| cg05830416 | 9  | 35665010  | ARHGEF39     | -4.356±0.201 | -4.488±0.252 | 7.05E-03 |
| cg26185508 | 1  | 54619445  | CDCP2        | 0.812±0.263  | 0.484±0.746  | 7.07E-03 |
| cg18282543 | 16 | 1384682   | BAIAP3       | -3.877±0.384 | -3.398±1.087 | 7.08E-03 |
| cg10601168 | 6  | 154831192 | CNKSRR3      | -4.625±0.426 | -4.322±0.602 | 7.09E-03 |
| cg01605517 | 1  | 247081873 | AHCTF1       | 1.916±0.303  | 2.104±0.344  | 7.09E-03 |
| cg26227465 | 12 | 68553577  | IFNG         | 0.947±0.295  | 0.571±0.858  | 7.12E-03 |

|            |    |           |            |              |              |          |
|------------|----|-----------|------------|--------------|--------------|----------|
| cg06407137 | 17 | 72527515  | CD300LB    | 2.173±0.251  | 1.955±0.467  | 7.13E-03 |
| cg14271690 | 20 | 37209999  | ADIG       | 2.25±0.271   | 1.989±0.57   | 7.13E-03 |
| cg17339202 | 1  | 33160900  | SYNC       | -2.907±0.987 | -2.302±1.102 | 7.15E-03 |
| cg25443975 | 19 | 55794597  | BRSK1      | 2.712±0.274  | 2.485±0.478  | 7.15E-03 |
| cg09173897 | 14 | 94639732  | PPP4R4     | -1.147±0.281 | -0.817±0.746 | 7.15E-03 |
| cg23696834 | 6  | 42928345  | GNMT       | -4.204±0.654 | -3.758±0.87  | 7.16E-03 |
| cg06317209 | 12 | 58210878  | AVIL       | -0.095±0.283 | 0.201±0.658  | 7.16E-03 |
| cg13960126 | 19 | 6462999   | CRB3       | 1.338±0.216  | 1.52±0.389   | 7.18E-03 |
| cg01785568 | 4  | 4864833   | MSX1       | 0.44±0.257   | 0.122±0.722  | 7.18E-03 |
| cg23523368 | 1  | 115238494 | AMPD1      | 1.178±0.26   | 0.85±0.749   | 7.18E-03 |
| cg20520888 | 8  | 145086243 | SPATC1     | -1.606±0.301 | -1.269±0.758 | 7.19E-03 |
| cg05590294 | 12 | 9913395   | CD69       | 0.106±0.288  | -0.277±0.879 | 7.20E-03 |
| cg23552468 | 9  | 35040926  | C9orf131   | 0.766±0.327  | 0.532±0.47   | 7.21E-03 |
| cg25724441 | 17 | 68165759  | KCNJ2      | -4.471±0.355 | -3.862±1.42  | 7.22E-03 |
| cg13669583 | 16 | 30546630  | ZNF747     | -0.413±0.174 | -0.525±0.213 | 7.24E-03 |
| cg25149155 | 14 | 23775777  | BCL2L2     | -1.998±0.264 | -1.813±0.367 | 7.24E-03 |
| cg12894984 | 17 | 37823631  | PNMT       | 0.839±0.185  | 0.585±0.586  | 7.25E-03 |
| cg11286122 | 11 | 118477406 | PHLDB1     | 1.345±0.25   | 1.58±0.513   | 7.26E-03 |
| cg16964535 | 2  | 27498334  | DNAJC5G    | 4.08±0.277   | 3.886±0.386  | 7.27E-03 |
| cg18110535 | 18 | 3012413   | LPIN2      | -4.321±0.264 | -3.935±0.891 | 7.29E-03 |
| cg26431343 | 22 | 32808764  | RTCB       | -0.069±0.301 | -0.43±0.819  | 7.29E-03 |
| cg10644361 | 14 | 37667230  | MIPOL1     | -3.232±0.622 | -2.803±0.845 | 7.30E-03 |
| cg14209518 | 11 | 114166636 | NNMT       | 0.494±0.384  | 0.199±0.608  | 7.30E-03 |
| cg23181434 | 17 | 60556158  | TLK2       | -0.681±0.283 | -0.873±0.375 | 7.31E-03 |
| cg04799664 | 16 | 57053850  | NLRC5      | 1.363±0.302  | 1.135±0.466  | 7.32E-03 |
| cg14238120 | 1  | 22328026  | CELA3A     | 1.314±0.231  | 1.106±0.453  | 7.33E-03 |
| cg01441777 | 22 | 38714416  | CSNK1E     | -1.441±0.441 | -1.055±0.83  | 7.33E-03 |
| cg27349244 | 12 | 122611918 | MLXIP      | 3.724±0.269  | 3.225±1.169  | 7.34E-03 |
| cg04684516 | 5  | 121647858 | SNCAIP     | -3.187±1.078 | -2.488±1.331 | 7.34E-03 |
| cg06236061 | 12 | 110317318 | GLTP       | -3.033±0.323 | -2.786±0.51  | 7.35E-03 |
| cg11856697 | 17 | 72276937  | DNAI2      | 2.014±0.263  | 1.769±0.533  | 7.36E-03 |
| cg10731149 | 2  | 172378686 | CYBRD1     | -3.702±0.376 | -3.251±1.028 | 7.37E-03 |
| cg27592318 | 9  | 100707064 | HEMGN      | 2.553±0.275  | 2.223±0.75   | 7.37E-03 |
| cg19855618 | 8  | 144731579 | ZNF623     | 2.929±0.213  | 2.778±0.303  | 7.37E-03 |
| cg00657582 | 14 | 21904906  | CHD8       | -3.652±0.388 | -3.296±0.775 | 7.38E-03 |
| cg12604192 | 1  | 111062127 | KCNA10     | -0.866±0.329 | -0.543±0.715 | 7.40E-03 |
| cg21017752 | 10 | 93393203  | PPP1R3C    | -3.746±0.335 | -3.27±1.1    | 7.40E-03 |
| cg26928972 | 3  | 122043799 | CSTA       | 0.297±0.366  | -0.151±1.02  | 7.41E-03 |
| cg19219503 | 10 | 37414802  | ANKRD30A   | 3.083±0.414  | 2.807±0.533  | 7.41E-03 |
| cg24912023 | 2  | 110979750 | LINC00116  | -0.4±0.321   | -0.073±0.725 | 7.44E-03 |
| cg07981910 | 9  | 124461412 | DAB2IP     | -6.254±0.63  | -5.345±2.106 | 7.45E-03 |
| cg06507244 | 10 | 127569494 | DHX32      | 1.693±0.254  | 1.886±0.4    | 7.52E-03 |
| cg15537850 | 8  | 144661051 | NAPRT1     | -0.158±0.305 | 0.19±0.788   | 7.53E-03 |
| cg04755031 | 22 | 44287841  | PNPLA5     | -3.523±0.326 | -3.239±0.614 | 7.54E-03 |
| cg16219122 | 7  | 87343956  | ABCB1      | -0.03±0.427  | -0.391±0.771 | 7.54E-03 |
| cg24164563 | 17 | 74136395  | RNF157-AS1 | -2.256±0.315 | -1.805±1.048 | 7.56E-03 |
| cg16139316 | 1  | 153330758 | S100A9     | 1.338±0.473  | 0.797±1.227  | 7.56E-03 |
| cg24688248 | 15 | 73976389  | CD276      | -3.033±0.333 | -2.799±0.469 | 7.56E-03 |
| cg16609957 | 5  | 132161867 | SHROOM1    | 1.08±0.318   | 0.759±0.714  | 7.57E-03 |
| cg24315815 | 3  | 145969579 | PLSCR4     | -0.102±0.328 | 0.307±0.937  | 7.58E-03 |
| cg21951612 | 3  | 138092089 | MRAS       | 2.797±0.173  | 2.662±0.281  | 7.59E-03 |
| cg04518808 | 19 | 54384822  | PRKCG      | -3.144±0.33  | -2.666±1.112 | 7.60E-03 |
| cg07091552 | 11 | 73721170  | UCP3       | 2.566±0.178  | 2.47±0.155   | 7.62E-03 |
| cg08452348 | 5  | 134303703 | CATSPER3   | 3.662±0.398  | 3.391±0.536  | 7.63E-03 |
| cg25732252 | 9  | 130679915 | ST6GALNAC4 | 0.068±0.206  | -0.159±0.514 | 7.63E-03 |
| cg04587829 | 17 | 80692947  | FN3K       | 0.487±0.314  | 0.106±0.871  | 7.64E-03 |
| cg25670376 | 17 | 49295249  | MBTD1      | 1.5±0.327    | 1.21±0.629   | 7.65E-03 |
| cg26071823 | 14 | 24583182  | DCAF11     | -4.252±0.246 | -4.113±0.236 | 7.65E-03 |
| cg08253405 | 1  | 109401072 | AKNAD1     | 1.712±0.352  | 1.524±0.304  | 7.65E-03 |
| cg05251000 | 9  | 132935664 | NCS1       | -1.283±0.307 | -1.626±0.777 | 7.66E-03 |
| cg05743054 | 3  | 158288903 | MLF1       | -5.361±0.455 | -4.932±0.945 | 7.66E-03 |
| cg24623694 | 19 | 40919760  | PRX        | -1.518±0.293 | -1.093±0.988 | 7.67E-03 |
| cg06186861 | 3  | 44771174  | ZNF501     | -3.642±0.324 | -3.245±0.909 | 7.69E-03 |
| cg13588354 | 20 | 54823303  | MC3R       | -1.937±0.359 | -2.199±0.537 | 7.72E-03 |
| cg20126106 | 3  | 111718135 | TAGLN3     | -2.989±0.342 | -2.647±0.761 | 7.72E-03 |
| cg03752087 | 19 | 15163470  | CASP14     | 1.78±0.281   | 1.481±0.674  | 7.73E-03 |
| cg09998519 | 1  | 245028194 | HNRNP      | -4.506±0.431 | -4.779±0.518 | 7.73E-03 |

|            |    |           |              |              |              |          |
|------------|----|-----------|--------------|--------------|--------------|----------|
| cg03558807 | 5  | 111495981 | EPB41L4A-AS1 | 3.385±0.241  | 3.146±0.532  | 7.74E-03 |
| cg26372517 | 1  | 36039159  | TFAP2E       | -2.114±0.71  | -1.647±0.904 | 7.74E-03 |
| cg05988645 | 16 | 8715306   | METTL22      | -1.89±0.516  | -2.268±0.773 | 7.74E-03 |
| cg14912034 | 10 | 30918851  | LYZL2        | 0.57±0.264   | 0.256±0.717  | 7.75E-03 |
| cg18602811 | 3  | 32612253  | DYNC1LI1     | -3.576±0.427 | -3.349±0.363 | 7.75E-03 |
| cg05475904 | 1  | 85743377  | BCL10        | 4.93±0.363   | 4.53±0.906   | 7.76E-03 |
| cg24023606 | 14 | 90421208  | EFCAB11      | -5.624±0.354 | -5.051±1.345 | 7.79E-03 |
| cg03455458 | 1  | 213124545 | VASH2        | -4.167±0.345 | -3.671±1.155 | 7.79E-03 |
| cg17769158 | 8  | 103563327 | ODF1         | 3.103±0.199  | 2.927±0.383  | 7.80E-03 |
| cg21368354 | 13 | 111267856 | CARKD        | -4.6±0.466   | -4.324±0.496 | 7.80E-03 |
| cg20776317 | 9  | 139292793 | SNAPC4       | 2.495±0.276  | 2.723±0.486  | 7.80E-03 |
| cg22637941 | 8  | 134203841 | WISP1        | 2.107±0.493  | 1.729±0.788  | 7.85E-03 |
| cg13928306 | 16 | 3162397   | ZNF205       | -1.701±0.479 | -1.256±0.98  | 7.86E-03 |
| cg19626078 | 10 | 134973796 | KNDC1        | -4.498±0.524 | -4.117±0.778 | 7.86E-03 |
| cg03763616 | 19 | 50921997  | SPIB         | -2.31±0.372  | -1.975±0.734 | 7.87E-03 |
| cg26105232 | 10 | 6105656   | IL2RA        | -0.538±0.281 | -0.858±0.73  | 7.88E-03 |
| cg04558553 | 4  | 69960869  | UGT2B7       | 0.753±0.264  | 0.442±0.711  | 7.88E-03 |
| cg23673107 | 19 | 11908712  | ZNF491       | -1.313±0.348 | -0.951±0.816 | 7.89E-03 |
| cg16270890 | 16 | 1875963   | HAGH         | -1.805±0.256 | -2.145±0.789 | 7.89E-03 |
| cg00145118 | 5  | 141393931 | GNPDA1       | -0.813±0.314 | -0.497±0.707 | 7.90E-03 |
| cg11462865 | 17 | 39684124  | KRT19        | -4.038±0.779 | -3.459±1.196 | 7.90E-03 |
| cg26563737 | 16 | 89725269  | SPATA33      | 0.594±0.186  | 0.355±0.553  | 7.94E-03 |
| cg16065186 | 17 | 37856663  | ERBB2        | -3.849±0.671 | -3.36±1.002  | 7.95E-03 |
| cg09258965 | 6  | 13329625  | TBC1D7       | 1.735±0.236  | 1.501±0.525  | 7.95E-03 |
| cg06185738 | 11 | 22359868  | SLC17A6      | -4.197±0.435 | -3.761±0.976 | 7.99E-03 |
| cg03077836 | 2  | 9347292   | ASAP2        | -5.203±0.808 | -4.62±1.191  | 7.99E-03 |
| cg15264273 | 9  | 97040460  | ZNF169       | 2.301±0.331  | 2.064±0.482  | 8.04E-03 |
| cg20919556 | 6  | 154832050 | CNKSR3       | -4.414±0.382 | -4.154±0.517 | 8.04E-03 |
| cg21198021 | 1  | 33841581  | PHC2         | 1.557±0.275  | 1.36±0.4     | 8.05E-03 |
| cg18191162 | 6  | 39693228  | KIF6         | -4.28±0.29   | -3.895±0.897 | 8.06E-03 |
| cg07495664 | 1  | 150978905 | FAM63A       | -4.632±0.498 | -4.306±0.633 | 8.06E-03 |
| cg04356968 | 1  | 156212005 | BGLAP        | 2.416±0.141  | 2.315±0.207  | 8.09E-03 |
| cg07138512 | 1  | 21996317  | RAP1GAP      | -4.084±0.373 | -3.633±1.04  | 8.13E-03 |
| cg19872681 | 14 | 23284518  | SLC7A7       | 1.12±0.284   | 0.727±0.917  | 8.15E-03 |
| cg22005565 | 1  | 41487437  | SLFNL1       | 0.359±0.244  | 0.678±0.742  | 8.16E-03 |
| cg23495733 | 12 | 39299132  | CPNE8        | -5.341±0.681 | -4.809±1.124 | 8.17E-03 |
| cg23953396 | 17 | 72427941  | GPRC5C       | -4.43±0.745  | -3.889±1.112 | 8.20E-03 |
| cg19713083 | 2  | 176046495 | ATP5G3       | -4.358±0.474 | -4.637±0.506 | 8.20E-03 |
| cg05423257 | 2  | 233321600 | ALPI         | 3.636±0.309  | 3.378±0.558  | 8.21E-03 |
| cg11745019 | 8  | 108509756 | ANGPT1       | -4.075±0.27  | -3.611±1.1   | 8.22E-03 |
| cg25123470 | 10 | 103603722 | KCNIP2       | -1.691±0.328 | -2.231±1.28  | 8.22E-03 |
| cg23423382 | 17 | 16472440  | ZNF287       | -4.49±0.366  | -4.008±1.121 | 8.24E-03 |
| cg11201532 | 22 | 37882078  | MFNG         | -0.111±0.264 | 0.206±0.732  | 8.25E-03 |
| cg04008913 | 3  | 43327465  | SNRK         | -0.982±0.278 | -0.721±0.579 | 8.26E-03 |
| cg03919781 | 8  | 16884225  | MICU3        | -3.904±0.445 | -3.515±0.848 | 8.26E-03 |
| cg00176879 | 20 | 2843525   | PTPRA        | 5.779±0.295  | 5.6±0.334    | 8.26E-03 |
| cg15301694 | 14 | 31496854  | AP4S1        | 1.637±0.341  | 1.217±0.972  | 8.27E-03 |
| cg06094150 | 16 | 56685637  | MT1B         | 1.662±0.301  | 1.357±0.688  | 8.28E-03 |
| cg02376703 | 7  | 143106130 | EPHA1        | -4.49±0.56   | -4.809±0.564 | 8.30E-03 |
| cg01344452 | 17 | 54912143  | DGKE         | -4.854±0.605 | -3.739±2.657 | 8.34E-03 |
| cg16500334 | 21 | 46238534  | SUMO3        | -3.414±0.408 | -3.697±0.572 | 8.34E-03 |
| cg05698090 | 22 | 47134664  | CERK         | -3.388±0.354 | -3.663±0.581 | 8.34E-03 |
| cg27040030 | 16 | 325184    | RGS11        | -3.018±0.333 | -2.673±0.783 | 8.34E-03 |
| cg07433344 | 6  | 33172450  | HSD17B8      | -6.167±0.743 | -5.243±2.145 | 8.34E-03 |
| cg03003256 | 6  | 116849557 | FAM26D       | 0.792±0.306  | 0.503±0.644  | 8.35E-03 |
| cg00837103 | 20 | 61447268  | COL9A3       | -0.616±0.133 | -0.779±0.378 | 8.39E-03 |
| cg03086563 | 1  | 149857152 | HIST2H2BE    | -4.144±0.513 | -4.441±0.533 | 8.39E-03 |
| cg17162271 | 19 | 14640371  | TECR         | -4.722±0.389 | -4.49±0.427  | 8.41E-03 |
| cg26847866 | 8  | 27492077  | SCARA3       | -0.006±0.245 | -0.224±0.48  | 8.45E-03 |
| cg10822172 | 7  | 28338757  | CREB5        | -1.084±0.426 | -0.734±0.757 | 8.47E-03 |
| cg01735903 | 8  | 22102669  | POLR3D       | -3.15±0.321  | -2.965±0.331 | 8.47E-03 |
| cg03017653 | 1  | 231115871 | ARV1         | -1.571±0.405 | -1.888±0.674 | 8.49E-03 |
| cg08626653 | 7  | 100082322 | NYAP1        | 3.14±0.414   | 2.874±0.518  | 8.51E-03 |
| cg15374234 | 17 | 72709026  | CD300LF      | 0.358±0.263  | 0.023±0.783  | 8.52E-03 |
| cg15381769 | 6  | 128841972 | PTPRK        | -5.089±0.52  | -4.67±0.9    | 8.53E-03 |
| cg13337865 | 17 | 6734991   | TEKT1        | -3.952±0.35  | -3.56±0.902  | 8.54E-03 |
| cg27083787 | 2  | 113543245 | IL1A         | 3.173±0.294  | 2.888±0.64   | 8.57E-03 |

|            |    |           |           |              |              |          |
|------------|----|-----------|-----------|--------------|--------------|----------|
| cg01656955 | 1  | 40137966  | NT5C1A    | -2.996±0.327 | -2.701±0.655 | 8.57E-03 |
| cg02217159 | 6  | 62996697  | KHDRBS2   | -3.476±0.441 | -2.98±1.142  | 8.57E-03 |
| cg26091981 | 2  | 136594866 | LCT       | 2.39±0.328   | 2.053±0.766  | 8.58E-03 |
| cg06547766 | 3  | 187930704 | LPP       | 0.394±0.218  | 0.056±0.802  | 8.58E-03 |
| cg22619563 | 3  | 89156830  | EPHA3     | -4.597±0.425 | -4.154±1.007 | 8.58E-03 |
| cg22190819 | 20 | 26036118  | FAM182A   | 0.687±0.141  | 0.562±0.276  | 8.60E-03 |
| cg26625319 | 2  | 97001960  | NCAPH     | -5.563±0.347 | -5.777±0.406 | 8.60E-03 |
| cg20627916 | 6  | 152128328 | ESR1      | -2.158±0.412 | -1.75±0.922  | 8.62E-03 |
| cg06784466 | 19 | 52297968  | FPR3      | -0.24±0.254  | -0.557±0.741 | 8.63E-03 |
| cg13591701 | 17 | 66597007  | FAM20A    | -2.093±0.269 | -1.877±0.464 | 8.63E-03 |
| cg20082641 | 15 | 69590255  | PAQR5     | 1.94±0.435   | 2.389±1.022  | 8.63E-03 |
| cg08614201 | 1  | 145715134 | CD160     | 2.262±0.244  | 2.434±0.353  | 8.64E-03 |
| cg21252483 | 19 | 49399788  | TULP2     | 0.901±0.153  | 1.116±0.508  | 8.64E-03 |
| cg22647507 | 7  | 94293635  | PEG10     | 2.862±0.226  | 2.693±0.355  | 8.65E-03 |
| cg07864632 | 2  | 230785697 | TRIP12    | -5.116±0.45  | -4.602±1.186 | 8.66E-03 |
| cg08833432 | 20 | 60719824  | SS18L1    | -1.604±0.257 | -1.262±0.804 | 8.66E-03 |
| cg11524446 | 1  | 34642184  | C1orf94   | 0.178±0.243  | 0.397±0.486  | 8.67E-03 |
| cg14350002 | 9  | 89562473  | GAS1      | -4.792±0.414 | -4.17±1.474  | 8.68E-03 |
| cg18253802 | 6  | 135501780 | MYB       | -3.955±0.425 | -4.203±0.453 | 8.68E-03 |
| cg18365380 | 22 | 24641011  | GGT5      | 0.073±0.118  | 0.18±0.238   | 8.68E-03 |
| cg23538064 | 6  | 31913275  | CFB       | -0.741±0.373 | -0.396±0.769 | 8.70E-03 |
| cg13530039 | 11 | 62689557  | CHRM1     | -0.262±0.204 | -0.487±0.518 | 8.70E-03 |
| cg21803680 | 2  | 216946845 | TMEM169   | -4.611±0.351 | -4.337±0.586 | 8.71E-03 |
| cg22443330 | 15 | 31196599  | FAN1      | -2.097±0.513 | -1.702±0.838 | 8.72E-03 |
| cg22940152 | 20 | 62669102  | LINC00176 | -0.512±0.141 | -0.674±0.374 | 8.73E-03 |
| cg03898365 | 11 | 6897491   | OR10A4    | -0.466±0.341 | -0.817±0.799 | 8.73E-03 |
| cg06720660 | 14 | 21248497  | RNASE6    | 2.189±0.327  | 1.863±0.739  | 8.73E-03 |
| cg10978355 | 5  | 80529340  | CKMT2     | -1.384±0.373 | -0.93±1.057  | 8.74E-03 |
| cg16907514 | 14 | 56046098  | KTN1-AS1  | -3.05±0.448  | -2.701±0.745 | 8.74E-03 |
| cg20790540 | 6  | 42884350  | PTCRA     | 1.907±0.189  | 1.666±0.564  | 8.76E-03 |
| cg18632631 | 17 | 7284049   | TNK1      | -1.337±0.417 | -0.969±0.813 | 8.77E-03 |
| cg09076077 | 20 | 58630315  | C20orf197 | 1.202±0.308  | 0.713±1.164  | 8.79E-03 |
| cg03330058 | 3  | 127392403 | ABTB1     | -0.837±0.402 | -1.12±0.583  | 8.79E-03 |
| cg27182761 | 12 | 76426593  | PHLDA1    | -0.983±0.236 | -1.404±1.011 | 8.79E-03 |
| cg26359204 | 4  | 85419877  | NKX6-1    | -4.831±0.465 | -4.271±1.303 | 8.80E-03 |
| cg26158980 | 11 | 3692187   | CHRNA10   | 3.072±0.283  | 2.898±0.333  | 8.81E-03 |
| cg26149678 | 11 | 71709917  | IL18BP    | -0.652±0.32  | -0.269±0.891 | 8.82E-03 |
| cg08088390 | 20 | 68170     | DEFB125   | 0.633±0.291  | 0.287±0.806  | 8.83E-03 |
| cg03340878 | 6  | 27925166  | OR2B6     | 0.7±0.198    | 0.4±0.714    | 8.86E-03 |
| cg15777781 | 10 | 11047271  | CELF2     | 0.581±0.302  | 0.98±0.939   | 8.87E-03 |
| cg17769238 | 11 | 2019568   | H19       | 0.629±0.121  | 0.461±0.398  | 8.89E-03 |
| cg04180868 | 10 | 25241462  | PRTFDC1   | -4.003±0.876 | -3.482±0.97  | 8.90E-03 |
| cg02875404 | 19 | 57966896  | VN1R1     | 3.056±0.254  | 2.894±0.318  | 8.92E-03 |
| cg07504718 | 10 | 127465376 | MMP21     | 0.819±0.222  | 0.583±0.542  | 8.92E-03 |
| cg09814877 | 19 | 51293677  | ACPT      | 2.897±0.248  | 2.61±0.666   | 8.93E-03 |
| cg03361068 | 14 | 51561562  | TRIM9     | -4.783±0.362 | -4.193±1.409 | 8.95E-03 |
| cg09429185 | 17 | 15603481  | ZNF286A   | -3.18±0.402  | -2.868±0.668 | 8.95E-03 |
| cg26205432 | 6  | 118869571 | PLN       | 1.13±0.286   | 0.905±0.471  | 8.96E-03 |
| cg01612158 | 1  | 157567720 | FCRL4     | -0.578±0.252 | -0.936±0.849 | 8.96E-03 |
| cg27278802 | 11 | 66359430  | CCDC87    | 2.678±0.34   | 2.447±0.467  | 8.98E-03 |
| cg00755709 | 9  | 104147631 | BAAT      | 1.954±0.189  | 1.826±0.26   | 8.99E-03 |
| cg06763078 | 11 | 17756761  | KCNC1     | -4.418±0.36  | -3.862±1.324 | 9.00E-03 |
| cg00769470 | 20 | 207338    | DEFB129   | 1.757±0.28   | 1.478±0.635  | 9.03E-03 |
| cg24311382 | 6  | 132272408 | CTGF      | -3.883±0.935 | -3.35±0.96   | 9.04E-03 |
| cg19311812 | 5  | 140700259 | TAF7      | -5.312±0.347 | -5.575±0.56  | 9.07E-03 |
| cg10715231 | 5  | 157079546 | SOX30     | 3.408±0.227  | 3.173±0.539  | 9.10E-03 |
| cg04365980 | 16 | 78056736  | CLEC3A    | 0.429±0.255  | 0.128±0.702  | 9.11E-03 |
| cg19017177 | 19 | 51141227  | SYT3      | -0.104±0.333 | 0.198±0.674  | 9.11E-03 |
| cg11695684 | 2  | 233391265 | CHRND     | 0.801±0.389  | 1.161±0.809  | 9.13E-03 |
| cg15014549 | 17 | 19437003  | SLC47A1   | -3.857±0.285 | -3.535±0.748 | 9.14E-03 |
| cg17412351 | 7  | 75678396  | MDH2      | -1.117±0.312 | -1.391±0.609 | 9.14E-03 |
| cg04632683 | 19 | 54620122  | TFPT      | 1.848±0.332  | 2.146±0.667  | 9.15E-03 |
| cg23384185 | 18 | 657227    | TYMS      | -3.298±0.354 | -3.582±0.617 | 9.15E-03 |
| cg21712685 | 6  | 35744605  | CLPSL2    | -4.373±0.271 | -4.584±0.455 | 9.15E-03 |
| cg25692323 | 10 | 44101569  | ZNF485    | 0.406±0.16   | 0.181±0.536  | 9.17E-03 |
| cg04633384 | 18 | 13218816  | LDLRAD4   | -4.033±0.468 | -3.61±0.948  | 9.17E-03 |
| cg01426743 | 1  | 178994243 | FAM20B    | 1.295±0.208  | 0.964±0.794  | 9.20E-03 |

|            |    |           |              |              |              |          |
|------------|----|-----------|--------------|--------------|--------------|----------|
| cg17575811 | 11 | 2466409   | KCNQ1        | -3.841±0.431 | -3.446±0.885 | 9.23E-03 |
| cg22805632 | 17 | 38978827  | KRT10        | 2.338±0.302  | 2.058±0.629  | 9.23E-03 |
| cg27178345 | 17 | 61950572  | CSH2         | 2.86±0.16    | 2.731±0.281  | 9.23E-03 |
| cg15153383 | 16 | 57770620  | KATNB1       | -4.171±0.391 | -3.892±0.581 | 9.25E-03 |
| cg15727249 | 11 | 116693415 | APOA4        | 0.65±0.219   | 0.372±0.655  | 9.30E-03 |
| cg08900043 | 12 | 54378896  | HOXC10       | -2.081±0.228 | -1.532±1.337 | 9.33E-03 |
| cg03402876 | 2  | 11051991  | KCNF1        | -5.804±0.748 | -5.313±0.984 | 9.33E-03 |
| cg04749104 | 2  | 119981169 | STEAP3       | -4.189±0.331 | -4.397±0.406 | 9.34E-03 |
| cg23179168 | 8  | 127570165 | FAM84B       | -4.423±0.47  | -4.119±0.607 | 9.34E-03 |
| cg20950277 | 4  | 122085241 | TNIP3        | 1.424±0.395  | 1.158±0.54   | 9.36E-03 |
| cg01795122 | 19 | 48828859  | EMP3         | -4.228±0.849 | -4.815±1.208 | 9.38E-03 |
| cg13140740 | 7  | 12726553  | ARL4A        | -1.962±0.45  | -1.682±0.544 | 9.38E-03 |
| cg20261915 | 17 | 9729424   | GLP2R        | -0.031±0.232 | 0.248±0.656  | 9.38E-03 |
| cg09276883 | 1  | 210501966 | HHAT         | -3.169±0.26  | -3.467±0.695 | 9.38E-03 |
| cg26189983 | 1  | 12227700  | TNFRSF1B     | -3.86±0.553  | -3.101±1.804 | 9.39E-03 |
| cg00107488 | 22 | 19930437  | TXNRD2       | -0.95±0.264  | -1.194±0.549 | 9.40E-03 |
| cg01774645 | 1  | 161040044 | ARHGAP30     | 1.271±0.328  | 0.97±0.679   | 9.42E-03 |
| cg18173454 | 10 | 15209775  | NMT2         | -4.306±0.385 | -4.104±0.334 | 9.46E-03 |
| cg01432087 | 11 | 67242162  | 0            | 0.417±0.302  | 0.111±0.702  | 9.47E-03 |
| cg05696092 | 19 | 50084283  | PRRG2        | -0.282±0.385 | -0.64±0.811  | 9.48E-03 |
| cg12699145 | 16 | 18995637  | TMC7         | -3.245±0.507 | -2.878±0.774 | 9.50E-03 |
| cg12181621 | 6  | 27840068  | HIST1H3I     | -4.252±0.331 | -3.608±1.563 | 9.50E-03 |
| cg02387679 | 5  | 75699865  | IQGAP2       | -4.051±0.362 | -3.602±1.06  | 9.52E-03 |
| cg19586576 | 17 | 42906845  | GJC1         | -3.619±0.261 | -3.121±1.209 | 9.52E-03 |
| cg01888166 | 2  | 20527635  | PUM2         | 1.842±0.324  | 1.481±0.842  | 9.55E-03 |
| cg03218374 | 20 | 896981    | ANGPT4       | -2.383±0.26  | -2.132±0.571 | 9.55E-03 |
| cg15195276 | 9  | 113799936 | LPAR1        | -4.512±0.689 | -4.086±0.829 | 9.55E-03 |
| cg24478387 | 7  | 56131848  | SUMF2        | -3.023±0.392 | -3.227±0.334 | 9.56E-03 |
| cg08321330 | 16 | 1280834   | TPSB2        | 1.496±0.216  | 1.222±0.647  | 9.57E-03 |
| cg00261781 | 2  | 20212517  | MATN3        | -4.92±0.963  | -4.333±1.128 | 9.58E-03 |
| cg24937126 | 7  | 107643285 | LAMB1        | -4.981±0.493 | -4.581±0.877 | 9.58E-03 |
| cg05385377 | 1  | 15480844  | TMEM51       | -3.493±0.473 | -3.093±0.885 | 9.58E-03 |
| cg02784874 | 17 | 39728962  | KRT9         | 0.819±0.189  | 0.635±0.422  | 9.60E-03 |
| cg11173246 | 11 | 841376    | POLR2L       | -0.546±0.189 | -0.841±0.71  | 9.61E-03 |
| cg26369667 | 11 | 101981789 | YAP1         | -5.495±0.812 | -4.971±1.047 | 9.62E-03 |
| cg15589354 | 1  | 229760606 | TAF5L        | -1.849±0.258 | -2.12±0.627  | 9.62E-03 |
| cg06834875 | 14 | 100111263 | HHIPL1       | -2.875±0.348 | -2.438±1.035 | 9.64E-03 |
| cg10620457 | 1  | 57432110  | C8B          | 1.489±0.333  | 1.185±0.685  | 9.66E-03 |
| cg08539093 | 9  | 136084560 | OBP2B        | 1.796±0.26   | 1.537±0.596  | 9.68E-03 |
| cg11058932 | 7  | 130372167 | TSGA13       | 0.956±0.22   | 0.668±0.686  | 9.70E-03 |
| cg24101359 | 6  | 42928495  | GNMT         | -3.645±0.843 | -3.089±1.125 | 9.70E-03 |
| cg17983064 | 5  | 131396357 | IL3          | 2.197±0.308  | 1.934±0.585  | 9.70E-03 |
| cg07112154 | 17 | 41985074  | MPP2         | -2.663±0.29  | -2.287±0.893 | 9.74E-03 |
| cg05023116 | 19 | 56510892  | NLRP5        | 3.572±0.439  | 3.238±0.719  | 9.76E-03 |
| cg18431127 | 15 | 43513563  | EPB42        | 0.464±0.238  | 0.115±0.838  | 9.76E-03 |
| cg06335889 | 20 | 32077519  | CBFA2T2      | -4.466±0.352 | -4.692±0.45  | 9.76E-03 |
| cg03251857 | 9  | 134164580 | PPAPDC3      | 1.898±0.193  | 1.692±0.479  | 9.77E-03 |
| cg02261346 | 22 | 43898597  | MPPED1       | 2.731±0.382  | 2.419±0.686  | 9.77E-03 |
| cg16863382 | 16 | 75252695  | CTRB1        | 3.318±0.233  | 3.442±0.212  | 9.77E-03 |
| cg13017345 | 10 | 111966029 | MXI1         | 1.828±0.285  | 1.427±0.961  | 9.77E-03 |
| cg11554605 | 7  | 95115354  | ASB4         | 1.592±0.343  | 1.992±0.942  | 9.78E-03 |
| cg12998491 | 9  | 134152531 | FAM78A       | -6.278±0.664 | -5.194±2.622 | 9.79E-03 |
| cg19221959 | 7  | 94537347  | PPP1R9A      | -4.498±0.988 | -3.917±1.092 | 9.79E-03 |
| cg22794078 | 15 | 65904012  | VWA9         | -3.889±0.49  | -3.521±0.791 | 9.81E-03 |
| cg15778232 | 12 | 7081145   | EMG1         | 0.557±0.258  | 0.308±0.567  | 9.84E-03 |
| cg04788442 | 1  | 186265397 | PRG4         | -0.528±0.33  | -0.783±0.552 | 9.85E-03 |
| cg19188612 | 8  | 104384291 | CTHRC1       | 1.548±0.282  | 1.262±0.661  | 9.90E-03 |
| cg16986720 | 11 | 84634735  | DLG2         | 2.124±0.218  | 1.827±0.709  | 9.92E-03 |
| cg07676849 | 11 | 71845665  | FOLR3        | 0.333±0.221  | 0.074±0.611  | 9.93E-03 |
| cg01049530 | 4  | 81952008  | BMP3         | -4.064±0.479 | -3.553±1.191 | 9.94E-03 |
| cg07986773 | 22 | 45558609  | LOC100506714 | 0.726±0.347  | 0.417±0.7    | 9.95E-03 |
| cg06321883 | 6  | 70576541  | COL19A1      | -3.356±0.227 | -2.753±1.485 | 9.95E-03 |
| cg10500716 | 1  | 111993148 | WDR77        | 2.055±0.251  | 1.919±0.239  | 9.97E-03 |
| cg00818872 | 1  | 154540271 | CHRNA2       | -4.053±0.435 | -3.661±0.886 | 9.97E-03 |
| cg24388263 | 19 | 4241983   | 0            | 3.541±0.305  | 3.367±0.323  | 9.99E-03 |
| cg07310951 | 19 | 57350503  | PEG3         | 0.561±0.083  | 0.439±0.292  | 9.99E-03 |
| cg25314216 | 18 | 55301903  | LOC100505549 | 3.089±0.394  | 2.853±0.451  | 1.00E-02 |

---

<sup>a</sup>Probe IDs for the Infinium HumanMethylation27 BeadChip (Illumina). <sup>b</sup>National Center for Biotechnology Information (NCBI) Database (Genome Build 37).

Supplementary Table 6. Probes showing significant differences in DNA methylation levels between non-cancerous and cancerous tissue samples from patients belonging to the EGFR mutation, ALK fusion, KRAS mutation, ROS1 fusion, HER2 mutation and pan-negative groups.

| Probe ID <sup>a</sup> | Chromosome | Position <sup>b</sup> | Gene symbol      | Number of genomic driver aberration groups sharing DNA methylation alterations | Genomic driver aberration groups             |
|-----------------------|------------|-----------------------|------------------|--------------------------------------------------------------------------------|----------------------------------------------|
| cg24199834            | 4          | 147560126             | <i>POU4F2</i>    | 6                                                                              | EGFR, ALK, KRAS, ROS1, HER2 and pan-negative |
| cg26316946            | 6          | 101846967             | <i>GRIK2</i>     | 6                                                                              | EGFR, ALK, KRAS, ROS1, HER2 and pan-negative |
| cg01381846            | 7          | 27204785              | <i>HOXA9</i>     | 6                                                                              | EGFR, ALK, KRAS, ROS1, HER2 and pan-negative |
| cg01354473            | 7          | 27204803              | <i>HOXA9</i>     | 6                                                                              | EGFR, ALK, KRAS, ROS1, HER2 and pan-negative |
| cg23290344            | 8          | 24771466              | <i>NEFM</i>      | 6                                                                              | EGFR, ALK, KRAS, ROS1, HER2 and pan-negative |
| cg26162582            | 12         | 4918391               | <i>KCNA6</i>     | 6                                                                              | EGFR, ALK, KRAS, ROS1, HER2 and pan-negative |
| cg07703401            | 16         | 230341                | <i>HBQ1</i>      | 6                                                                              | EGFR, ALK, KRAS, ROS1, HER2 and pan-negative |
| cg08118311            | 18         | 76740401              | <i>SALL3</i>     | 6                                                                              | EGFR, ALK, KRAS, ROS1, HER2 and pan-negative |
| cg06910100            | 19         | 17375091              | <i>USHBP1</i>    | 6                                                                              | EGFR, ALK, KRAS, ROS1, HER2 and pan-negative |
| cg20959866            | 1          | 4714008               | <i>AJAP1</i>     | 5                                                                              | EGFR, ALK, KRAS, ROS1 and pan-negative       |
| cg17945001            | 1          | 18434118              | <i>IGSF21</i>    | 5                                                                              | EGFR, ALK, KRAS, ROS1 and pan-negative       |
| cg14333454            | 1          | 27189298              | <i>SFN</i>       | 5                                                                              | EGFR, ALK, KRAS, ROS1 and pan-negative       |
| cg21604615            | 1          | 27668610              | <i>SYTL1</i>     | 5                                                                              | EGFR, ALK, KRAS, ROS1 and pan-negative       |
| cg19979773            | 1          | 27702651              | <i>FCN3</i>      | 5                                                                              | EGFR, ALK, KRAS, ROS1 and pan-negative       |
| cg26555310            | 1          | 68914717              | <i>RPE65</i>     | 5                                                                              | EGFR, ALK, KRAS, ROS1 and pan-negative       |
| cg06615154            | 1          | 153522553             | <i>S100A3</i>    | 5                                                                              | EGFR, ALK, KRAS, ROS1 and pan-negative       |
| cg00446235            | 1          | 161008644             | <i>TSTD1</i>     | 5                                                                              | EGFR, ALK, KRAS, ROS1 and pan-negative       |
| cg14701962            | 1          | 162348010             | <i>C1orf226</i>  | 5                                                                              | EGFR, ALK, KRAS, ROS1 and pan-negative       |
| cg10604646            | 1          | 163172649             | <i>RGS5</i>      | 5                                                                              | EGFR, ALK, KRAS, ROS1 and pan-negative       |
| cg14287742            | 1          | 169335773             | <i>NME7</i>      | 5                                                                              | EGFR, ALK, KRAS, ROS1 and pan-negative       |
| cg24407065            | 1          | 169335802             | <i>NME7</i>      | 5                                                                              | EGFR, ALK, KRAS, ROS1 and pan-negative       |
| cg05337441            | 2          | 21266568              | <i>APOB</i>      | 5                                                                              | EGFR, ALK, KRAS, ROS1 and pan-negative       |
| cg03177025            | 2          | 28112917              | <i>RBKS</i>      | 5                                                                              | EGFR, ALK, KRAS, ROS1 and pan-negative       |
| cg06627364            | 2          | 87755088              | <i>LINC00152</i> | 5                                                                              | EGFR, ALK, KRAS, ROS1 and pan-negative       |
| cg20291049            | 2          | 105472217             | <i>POU3F3</i>    | 5                                                                              | EGFR, ALK, KRAS, ROS1 and pan-negative       |
| cg01280080            | 2          | 216177276             | <i>ATIC</i>      | 5                                                                              | EGFR, ALK, KRAS, ROS1 and pan-negative       |
| cg19352038            | 2          | 223164869             | <i>PAX3</i>      | 5                                                                              | EGFR, ALK, KRAS, ROS1 and pan-negative       |
| cg02332525            | 3          | 6903153               | <i>GRM7</i>      | 5                                                                              | EGFR, ALK, KRAS, ROS1 and pan-negative       |
| cg15540820            | 3          | 27765283              | <i>EOMES</i>     | 5                                                                              | EGFR, ALK, KRAS, ROS1 and pan-negative       |
| cg12441928            | 3          | 46249985              | <i>CCR1</i>      | 5                                                                              | EGFR, ALK, KRAS, ROS1 and pan-negative       |
| cg20881888            | 3          | 50383079              | <i>ZMYND10</i>   | 5                                                                              | EGFR, ALK, KRAS, ROS1 and pan-negative       |
| cg06088032            | 3          | 50383227              | <i>ZMYND10</i>   | 5                                                                              | EGFR, ALK, KRAS, ROS1 and pan-negative       |
| cg26575445            | 3          | 169756530             | <i>GPR160</i>    | 5                                                                              | EGFR, ALK, KRAS, ROS1 and pan-negative       |
| cg10481740            | 4          | 1857103               | <i>LETM1</i>     | 5                                                                              | EGFR, ALK, KRAS, ROS1 and pan-negative       |
| cg09936561            | 4          | 9783623               | <i>DRD5</i>      | 5                                                                              | EGFR, ALK, KRAS, ROS1 and pan-negative       |
| cg03103192            | 4          | 52917271              | <i>SPATA18</i>   | 5                                                                              | EGFR, ALK, KRAS, ROS1 and pan-negative       |
| cg06771126            | 4          | 57547699              | <i>HOPX</i>      | 5                                                                              | EGFR, ALK, KRAS, ROS1 and pan-negative       |
| cg21614638            | 4          | 100737821             | <i>DAPP1</i>     | 5                                                                              | EGFR, ALK, KRAS, ROS1 and pan-negative       |
| cg20644981            | 4          | 152020400             | <i>RPS3A</i>     | 5                                                                              | EGFR, ALK, KRAS, ROS1 and pan-negative       |
| cg17166338            | 5          | 1295969               | <i>TERT</i>      | 5                                                                              | EGFR, ALK, KRAS, ROS1 and pan-negative       |
| cg23317501            | 5          | 35991215              | <i>UGT3A1</i>    | 5                                                                              | EGFR, ALK, KRAS, ROS1 and pan-negative       |
| cg00066816            | 5          | 158758353             | <i>LOC285626</i> | 5                                                                              | EGFR, ALK, KRAS, ROS1 and pan-negative       |
| cg25942450            | 5          | 170736251             | <i>TLX3</i>      | 5                                                                              | EGFR, ALK, KRAS, ROS1 and pan-negative       |
| cg25720804            | 5          | 170736389             | <i>TLX3</i>      | 5                                                                              | EGFR, ALK, KRAS, ROS1 and pan-negative       |
| cg04304130            | 6          | 11111894              | <i>ERVFRD-1</i>  | 5                                                                              | EGFR, ALK, KRAS, ROS1 and pan-negative       |
| cg23509869            | 6          | 31553441              | <i>LST1</i>      | 5                                                                              | EGFR, ALK, KRAS, ROS1 and pan-negative       |
| cg26626042            | 6          | 32151594              | <i>AGER</i>      | 5                                                                              | EGFR, ALK, KRAS, ROS1 and pan-negative       |
| cg22346765            | 6          | 41007522              | <i>UNC5CL</i>    | 5                                                                              | EGFR, ALK, KRAS, ROS1 and pan-negative       |
| cg03958979            | 6          | 108486387             | <i>NR2E1</i>     | 5                                                                              | EGFR, ALK, KRAS, ROS1 and pan-negative       |
| cg00411097            | 7          | 1596050               | <i>TMEM184A</i>  | 5                                                                              | EGFR, ALK, KRAS, ROS1 and pan-negative       |
| cg06194808            | 7          | 1596217               | <i>TMEM184A</i>  | 5                                                                              | EGFR, ALK, KRAS, ROS1 and pan-negative       |
| cg26322315            | 7          | 7758995               | <i>RPA3</i>      | 5                                                                              | EGFR, ALK, KRAS, ROS1 and pan-negative       |
| cg25778479            | 7          | 16686771              | <i>BZW2</i>      | 5                                                                              | EGFR, ALK, KRAS, ROS1 and pan-negative       |
| cg25691167            | 7          | 19184961              | <i>FERD3L</i>    | 5                                                                              | EGFR, ALK, KRAS, ROS1 and pan-negative       |
| cg26521404            | 7          | 27204981              | <i>HOXA9</i>     | 5                                                                              | EGFR, ALK, KRAS, ROS1 and pan-negative       |
| cg07778029            | 7          | 27205114              | <i>HOXA9</i>     | 5                                                                              | EGFR, ALK, KRAS, ROS1 and pan-negative       |
| cg13870866            | 7          | 35293130              | <i>TBX20</i>     | 5                                                                              | EGFR, ALK, KRAS, ROS1 and pan-negative       |
| cg09325711            | 7          | 39662764              | <i>RALA</i>      | 5                                                                              | EGFR, ALK, KRAS, ROS1 and pan-negative       |
| cg10896774            | 7          | 142636840             | <i>C7orf34</i>   | 5                                                                              | EGFR, ALK, KRAS, ROS1 and pan-negative       |
| cg09243021            | 7          | 142985019             | <i>CASP2</i>     | 5                                                                              | EGFR, ALK, KRAS, ROS1 and pan-negative       |
| cg24670715            | 8          | 6420506               | <i>ANGPT2</i>    | 5                                                                              | EGFR, ALK, KRAS, ROS1 and pan-negative       |
| cg16142218            | 8          | 23101221              | <i>CHMP7</i>     | 5                                                                              | EGFR, ALK, KRAS, ROS1 and pan-negative       |
| cg13153865            | 8          | 90914101              | <i>OSGIN2</i>    | 5                                                                              | EGFR, ALK, KRAS, ROS1 and pan-negative       |
| cg01242619            | 8          | 145049472             | <i>PLEC</i>      | 5                                                                              | EGFR, ALK, KRAS, ROS1 and pan-negative       |
| cg23447996            | 9          | 93564603              | <i>SYK</i>       | 5                                                                              | EGFR, ALK, KRAS, ROS1 and pan-negative       |
| cg03283569            | 9          | 127963181             | <i>RABEPK</i>    | 5                                                                              | EGFR, ALK, KRAS, ROS1 and pan-negative       |
| cg05050341            | 9          | 130617534             | <i>ENG</i>       | 5                                                                              | EGFR, ALK, KRAS, ROS1 and pan-negative       |
| cg02189785            | 9          | 139891008             | <i>CLIC3</i>     | 5                                                                              | EGFR, ALK, KRAS, ROS1 and pan-negative       |
| cg15387123            | 9          | 139891058             | <i>CLIC3</i>     | 5                                                                              | EGFR, ALK, KRAS, ROS1 and pan-negative       |
| cg19368582            | 10         | 88716646              | <i>MMRN2</i>     | 5                                                                              | EGFR, ALK, KRAS, ROS1 and pan-negative       |
| cg09944526            | 10         | 94594201              | <i>EXOC6</i>     | 5                                                                              | EGFR, ALK, KRAS, ROS1 and pan-negative       |
| cg22858288            | 11         | 2930322               | <i>SLC22A18</i>  | 5                                                                              | EGFR, ALK, KRAS, ROS1 and pan-negative       |
| cg04720330            | 11         | 2949813               | <i>PHLDA2</i>    | 5                                                                              | EGFR, ALK, KRAS, ROS1 and pan-negative       |
| cg27409364            | 11         | 17757743              | <i>KCNC1</i>     | 5                                                                              | EGFR, ALK, KRAS, ROS1 and pan-negative       |
| cg25563456            | 11         | 32456069              | <i>WT1</i>       | 5                                                                              | EGFR, ALK, KRAS, ROS1 and pan-negative       |
| cg15107670            | 11         | 32456759              | <i>WT1</i>       | 5                                                                              | EGFR, ALK, KRAS, ROS1 and pan-negative       |
| cg24898753            | 11         | 61735917              | <i>FTH1</i>      | 5                                                                              | EGFR, ALK, KRAS, ROS1 and pan-negative       |
| cg15842276            | 11         | 92702648              | <i>MTNR1B</i>    | 5                                                                              | EGFR, ALK, KRAS, ROS1 and pan-negative       |
| cg06491116            | 11         | 118122715             | <i>MPZL3</i>     | 5                                                                              | EGFR, ALK, KRAS, ROS1 and pan-negative       |
| cg13323752            | 12         | 8025567               | <i>SLC2A14</i>   | 5                                                                              | EGFR, ALK, KRAS, ROS1 and pan-negative       |
| cg24921858            | 12         | 12223989              | <i>BCL2L14</i>   | 5                                                                              | EGFR, ALK, KRAS, ROS1 and pan-negative       |
| cg05261299            | 12         | 52437299              | <i>NR4A1</i>     | 5                                                                              | EGFR, ALK, KRAS, ROS1 and pan-negative       |
| cg09924998            | 12         | 122751933             | <i>VPS33A</i>    | 5                                                                              | EGFR, ALK, KRAS, ROS1 and pan-negative       |
| cg12111714            | 13         | 26043472              | <i>ATP8A2</i>    | 5                                                                              | EGFR, ALK, KRAS, ROS1 and pan-negative       |
| cg00221494            | 13         | 98794593              | <i>FARP1</i>     | 5                                                                              | EGFR, ALK, KRAS, ROS1 and pan-negative       |
| cg10186456            | 16         | 2892912               | <i>PRSS30P</i>   | 5                                                                              | EGFR, ALK, KRAS, ROS1 and pan-negative       |
| cg25645462            | 16         | 57653702              | <i>GPR56</i>     | 5                                                                              | EGFR, ALK, KRAS, ROS1 and pan-negative       |
| cg06766367            | 16         | 67062687              | <i>CBFB</i>      | 5                                                                              | EGFR, ALK, KRAS, ROS1 and pan-negative       |
| cg25964007            | 17         | 9479910               | <i>WDR16</i>     | 5                                                                              | EGFR, ALK, KRAS, ROS1 and pan-negative       |
| cg04420907            | 17         | 9480215               | <i>WDR16</i>     | 5                                                                              | EGFR, ALK, KRAS, ROS1 and pan-negative       |
| cg07195577            | 17         | 27052828              | <i>TLCD1</i>     | 5                                                                              | EGFR, ALK, KRAS, ROS1 and pan-negative       |

|            |    |           |            |   |                                         |
|------------|----|-----------|------------|---|-----------------------------------------|
| cg05109049 | 17 | 29641333  | EVI2B      | 5 | EGFR, ALK, KRAS, ROS1 and pan-negative  |
| cg21460081 | 17 | 46656012  | HOXB4      | 5 | EGFR, ALK, KRAS, ROS1 and pan-negative  |
| cg12374721 | 17 | 46799640  | PRAC       | 5 | EGFR, ALK, KRAS, ROS1 and pan-negative  |
| cg01261503 | 17 | 62493599  | POLG2      | 5 | EGFR, ALK, KRAS, ROS1 and pan-negative  |
| cg06409153 | 17 | 67323953  | ABCA5      | 5 | EGFR, ALK, KRAS, ROS1 and pan-negative  |
| cg04534765 | 18 | 74962369  | GALR1      | 5 | EGFR, ALK, KRAS, ROS1 and pan-negative  |
| cg06005396 | 19 | 590541    | HCN2       | 5 | EGFR, ALK, KRAS, ROS1 and pan-negative  |
| cg05221167 | 19 | 9609397   | ZNF560     | 5 | EGFR, ALK, KRAS, ROS1 and pan-negative  |
| cg01656853 | 19 | 49199172  | FUT2       | 5 | EGFR, ALK, KRAS, ROS1 and pan-negative  |
| cg03289872 | 19 | 56989102  | ZNF667-AS1 | 5 | EGFR, ALK, KRAS, ROS1 and pan-negative  |
| cg25750259 | 20 | 43104962  | TTPAL      | 5 | EGFR, ALK, KRAS, ROS1 and pan-negative  |
| cg13699808 | 20 | 45985339  | ZMYND8     | 5 | EGFR, ALK, KRAS, ROS1 and pan-negative  |
| cg27214774 | 20 | 49253710  | FAM65C     | 5 | EGFR, ALK, KRAS, ROS1 and pan-negative  |
| cg10238818 | 21 | 27945554  | CYYR1      | 5 | EGFR, ALK, KRAS, ROS1 and pan-negative  |
| cg21130374 | 21 | 42734266  | MX2        | 5 | EGFR, ALK, KRAS, ROS1 and pan-negative  |
| cg12003230 | 21 | 44899139  | LINC00313  | 5 | EGFR, ALK, KRAS, ROS1 and pan-negative  |
| cg11450827 | 22 | 19513006  | CLDN5      | 5 | EGFR, ALK, KRAS, ROS1 and pan-negative  |
| cg26133068 | 22 | 24199008  | SLC2A11    | 5 | EGFR, ALK, KRAS, ROS1 and pan-negative  |
| cg18940763 | 22 | 29197846  | XBP1       | 5 | EGFR, ALK, KRAS, ROS1 and pan-negative  |
| cg24929834 | 22 | 29457241  | C22orf31   | 5 | EGFR, ALK, KRAS, ROS1 and pan-negative  |
| cg11172423 | 1  | 43205623  | CLDN19     | 5 | EGFR, ALK, ROS1, HER2 and pan-negative  |
| cg11921829 | 1  | 157746930 | FCRL2      | 5 | EGFR, ALK, ROS1, HER2 and pan-negative  |
| cg03734874 | 14 | 105071382 | TMEM179    | 5 | EGFR, ALK, ROS1, HER2 and pan-negative  |
| cg02245378 | 2  | 223161771 | CCDC140    | 5 | EGFR, ALK, KRAS, HER2 and pan-negative  |
| cg02164046 | 3  | 187388148 | SST        | 5 | EGFR, ALK, KRAS, HER2 and pan-negative  |
| cg10114327 | 4  | 122301573 | QRFP       | 5 | EGFR, ALK, KRAS, HER2 and pan-negative  |
| cg08109815 | 6  | 142409831 | NMBR       | 5 | EGFR, ALK, KRAS, HER2 and pan-negative  |
| cg08369065 | 8  | 11562683  | GATA4      | 5 | EGFR, ALK, KRAS, HER2 and pan-negative  |
| cg18555440 | 11 | 17741687  | MYOD1      | 5 | EGFR, ALK, KRAS, HER2 and pan-negative  |
| cg22660578 | 17 | 35294029  | LHX1       | 5 | EGFR, ALK, KRAS, HER2 and pan-negative  |
| cg25875213 | 19 | 38183055  | ZNF781     | 5 | EGFR, ALK, KRAS, HER2 and pan-negative  |
| cg13549845 | 4  | 93225960  | GRID2      | 5 | EGFR, KRAS, ROS1, HER2 and pan-negative |
| cg27626299 | 7  | 27282431  | EVX1       | 5 | EGFR, KRAS, ROS1, HER2 and pan-negative |
| cg02757432 | 10 | 125426048 | GPR26      | 5 | EGFR, KRAS, ROS1, HER2 and pan-negative |
| cg26609631 | 13 | 28366814  | GSX1       | 5 | EGFR, KRAS, ROS1, HER2 and pan-negative |
| cg18952647 | 15 | 83953744  | BNC1       | 5 | EGFR, KRAS, ROS1, HER2 and pan-negative |
| cg20023231 | 16 | 22825282  | HS3ST2     | 5 | EGFR, KRAS, ROS1, HER2 and pan-negative |
| cg14183455 | 1  | 31196733  | MATN1      | 4 | EGFR, ALK, KRAS and pan-negative        |
| cg06722633 | 1  | 37499309  | GRIK3      | 4 | EGFR, ALK, KRAS and pan-negative        |
| cg17241310 | 1  | 91182856  | BARHL2     | 4 | EGFR, ALK, KRAS and pan-negative        |
| cg18087477 | 1  | 115397597 | SYCP1      | 4 | EGFR, ALK, KRAS and pan-negative        |
| cg17166812 | 1  | 161169574 | NDUFS2     | 4 | EGFR, ALK, KRAS and pan-negative        |
| cg14448116 | 1  | 161170110 | NDUFS2     | 4 | EGFR, ALK, KRAS and pan-negative        |
| cg24272559 | 1  | 166572716 | FMO9P      | 4 | EGFR, ALK, KRAS and pan-negative        |
| cg09784259 | 1  | 169703422 | SELE       | 4 | EGFR, ALK, KRAS and pan-negative        |
| cg12467090 | 1  | 204459139 | PIK3C2B    | 4 | EGFR, ALK, KRAS and pan-negative        |
| cg10031456 | 2  | 33661691  | RASGRP3    | 4 | EGFR, ALK, KRAS and pan-negative        |
| cg27553955 | 2  | 42720326  | KCNQ3      | 4 | EGFR, ALK, KRAS and pan-negative        |
| cg17518825 | 2  | 46523461  | EPAS1      | 4 | EGFR, ALK, KRAS and pan-negative        |
| cg14902389 | 2  | 99342685  | MGAT4A     | 4 | EGFR, ALK, KRAS and pan-negative        |
| cg07403255 | 2  | 114036170 | PAX8       | 4 | EGFR, ALK, KRAS and pan-negative        |
| cg03874199 | 2  | 176964456 | HOXD12     | 4 | EGFR, ALK, KRAS and pan-negative        |
| cg15520279 | 2  | 176995088 | HOXD8      | 4 | EGFR, ALK, KRAS and pan-negative        |
| cg12127282 | 2  | 177014685 | MIR10B     | 4 | EGFR, ALK, KRAS and pan-negative        |
| cg25356886 | 2  | 208988967 | CRYGD      | 4 | EGFR, ALK, KRAS and pan-negative        |
| cg06092815 | 2  | 229046406 | SPHKAP     | 4 | EGFR, ALK, KRAS and pan-negative        |
| cg23095584 | 2  | 237077704 | GBX2       | 4 | EGFR, ALK, KRAS and pan-negative        |
| cg05073035 | 3  | 147127193 | ZIC1       | 4 | EGFR, ALK, KRAS and pan-negative        |
| cg03996822 | 4  | 74486558  | RASSF6     | 4 | EGFR, ALK, KRAS and pan-negative        |
| cg19466563 | 4  | 88450506  | SPARCL1    | 4 | EGFR, ALK, KRAS and pan-negative        |
| cg05350879 | 4  | 88451223  | SPARCL1    | 4 | EGFR, ALK, KRAS and pan-negative        |
| cg00534274 | 4  | 139163341 | SLC7A11    | 4 | EGFR, ALK, KRAS and pan-negative        |
| cg23207990 | 4  | 154710535 | SFRP2      | 4 | EGFR, ALK, KRAS and pan-negative        |
| cg01580681 | 4  | 174450016 | HAND2      | 4 | EGFR, ALK, KRAS and pan-negative        |
| cg07644368 | 5  | 115152785 | CDO1       | 4 | EGFR, ALK, KRAS and pan-negative        |
| cg02257405 | 5  | 131346985 | ACSL6      | 4 | EGFR, ALK, KRAS and pan-negative        |
| cg14196790 | 5  | 131705035 | SLC22A5    | 4 | EGFR, ALK, KRAS and pan-negative        |
| cg23563234 | 5  | 140797286 | PCDHGB7    | 4 | EGFR, ALK, KRAS and pan-negative        |
| cg23037403 | 5  | 178368183 | ZNF454     | 4 | EGFR, ALK, KRAS and pan-negative        |
| cg03355526 | 5  | 178368415 | ZNF454     | 4 | EGFR, ALK, KRAS and pan-negative        |
| cg08260959 | 6  | 26240920  | HIST1H4F   | 4 | EGFR, ALK, KRAS and pan-negative        |
| cg13903548 | 6  | 90024543  | GABRR2     | 4 | EGFR, ALK, KRAS and pan-negative        |
| cg25176823 | 7  | 5632593   | FSCN1      | 4 | EGFR, ALK, KRAS and pan-negative        |
| cg26069745 | 7  | 27142200  | HOXA2      | 4 | EGFR, ALK, KRAS and pan-negative        |
| cg09871315 | 7  | 27142682  | HOXA2      | 4 | EGFR, ALK, KRAS and pan-negative        |
| cg23432345 | 7  | 27196153  | HOXA7      | 4 | EGFR, ALK, KRAS and pan-negative        |
| cg27009703 | 7  | 27204894  | HOXA9      | 4 | EGFR, ALK, KRAS and pan-negative        |
| cg02008154 | 7  | 35293537  | TBX20      | 4 | EGFR, ALK, KRAS and pan-negative        |
| cg03775422 | 7  | 54610192  | VSTM2A     | 4 | EGFR, ALK, KRAS and pan-negative        |
| cg15279364 | 7  | 98466963  | TMEM130    | 4 | EGFR, ALK, KRAS and pan-negative        |
| cg27665659 | 7  | 100797595 | AP1S1      | 4 | EGFR, ALK, KRAS and pan-negative        |
| cg04106190 | 7  | 120964168 | WNT16      | 4 | EGFR, ALK, KRAS and pan-negative        |
| cg12782180 | 7  | 127880932 | LEP        | 4 | EGFR, ALK, KRAS and pan-negative        |
| cg18601426 | 7  | 158381220 | PTPRN2     | 4 | EGFR, ALK, KRAS and pan-negative        |
| cg04057858 | 8  | 10383763  | PRSS55     | 4 | EGFR, ALK, KRAS and pan-negative        |
| cg18267374 | 8  | 24771273  | NEFM       | 4 | EGFR, ALK, KRAS and pan-negative        |
| cg01295203 | 8  | 70984199  | PRDM14     | 4 | EGFR, ALK, KRAS and pan-negative        |
| cg27041096 | 8  | 120079173 | COLEC10    | 4 | EGFR, ALK, KRAS and pan-negative        |
| cg05755779 | 8  | 120079625 | COLEC10    | 4 | EGFR, ALK, KRAS and pan-negative        |
| cg23067535 | 8  | 124195133 | FAM83A     | 4 | EGFR, ALK, KRAS and pan-negative        |
| cg13870494 | 9  | 72658358  | MAMDC2     | 4 | EGFR, ALK, KRAS and pan-negative        |
| cg16832407 | 9  | 73736539  | TRPM3      | 4 | EGFR, ALK, KRAS and pan-negative        |
| cg14614211 | 10 | 28034247  | MKX        | 4 | EGFR, ALK, KRAS and pan-negative        |
| cg12354377 | 10 | 62149557  | ANK3       | 4 | EGFR, ALK, KRAS and pan-negative        |
| cg19358493 | 10 | 119300942 | EMX2       | 4 | EGFR, ALK, KRAS and pan-negative        |

|            |    |           |          |   |                                  |
|------------|----|-----------|----------|---|----------------------------------|
| cg04726200 | 11 | 2930485   | SLC22A18 | 4 | EGFR, ALK, KRAS and pan-negative |
| cg22243733 | 11 | 7506434   | OLFML1   | 4 | EGFR, ALK, KRAS and pan-negative |
| cg18343862 | 11 | 10590003  | LYVE1    | 4 | EGFR, ALK, KRAS and pan-negative |
| cg13641903 | 11 | 32452608  | WT1      | 4 | EGFR, ALK, KRAS and pan-negative |
| cg16092786 | 11 | 32455735  | WT1      | 4 | EGFR, ALK, KRAS and pan-negative |
| cg00187686 | 11 | 59634218  | TCN1     | 4 | EGFR, ALK, KRAS and pan-negative |
| cg01882150 | 11 | 63933998  | MACROD1  | 4 | EGFR, ALK, KRAS and pan-negative |
| cg22134325 | 11 | 66188745  | NPAS4    | 4 | EGFR, ALK, KRAS and pan-negative |
| cg21747271 | 11 | 67250052  | AIP      | 4 | EGFR, ALK, KRAS and pan-negative |
| cg21115990 | 11 | 68079081  | LRP5     | 4 | EGFR, ALK, KRAS and pan-negative |
| cg12266049 | 11 | 69461334  | CCND1    | 4 | EGFR, ALK, KRAS and pan-negative |
| cg17063929 | 11 | 89224799  | NOX4     | 4 | EGFR, ALK, KRAS and pan-negative |
| cg13348944 | 11 | 118047121 | SCN2B    | 4 | EGFR, ALK, KRAS and pan-negative |
| cg11965370 | 11 | 131780946 | NTM      | 4 | EGFR, ALK, KRAS and pan-negative |
| cg05521696 | 12 | 8025495   | SLC2A14  | 4 | EGFR, ALK, KRAS and pan-negative |
| cg27188703 | 12 | 50297581  | FAIM2    | 4 | EGFR, ALK, KRAS and pan-negative |
| cg22709192 | 12 | 54366909  | HOXC11   | 4 | EGFR, ALK, KRAS and pan-negative |
| cg01335367 | 12 | 110172208 | FAM222A  | 4 | EGFR, ALK, KRAS and pan-negative |
| cg03013422 | 12 | 125550350 | AACS     | 4 | EGFR, ALK, KRAS and pan-negative |
| cg13234863 | 12 | 130389138 | TMEM132D | 4 | EGFR, ALK, KRAS and pan-negative |
| cg05482722 | 13 | 52598175  | UTP14C   | 4 | EGFR, ALK, KRAS and pan-negative |
| cg02681442 | 14 | 29236008  | FOXG1    | 4 | EGFR, ALK, KRAS and pan-negative |
| cg19456540 | 14 | 60976285  | SIX6     | 4 | EGFR, ALK, KRAS and pan-negative |
| cg05023540 | 14 | 96116970  | TCL6     | 4 | EGFR, ALK, KRAS and pan-negative |
| cg21296230 | 15 | 33010536  | GREM1    | 4 | EGFR, ALK, KRAS and pan-negative |
| cg01091565 | 15 | 90294762  | MESP1    | 4 | EGFR, ALK, KRAS and pan-negative |
| cg10078415 | 16 | 20775011  | ACSM3    | 4 | EGFR, ALK, KRAS and pan-negative |
| cg23582919 | 16 | 23568380  | EARS2    | 4 | EGFR, ALK, KRAS and pan-negative |
| cg04802221 | 16 | 67223955  | EXOC3L1  | 4 | EGFR, ALK, KRAS and pan-negative |
| cg26388152 | 17 | 27944453  | CORO6    | 4 | EGFR, ALK, KRAS and pan-negative |
| cg18043280 | 17 | 40996886  | AOC2     | 4 | EGFR, ALK, KRAS and pan-negative |
| cg08089301 | 17 | 46655561  | HOXB4    | 4 | EGFR, ALK, KRAS and pan-negative |
| cg00466249 | 17 | 79269884  | SLC38A10 | 4 | EGFR, ALK, KRAS and pan-negative |
| cg06850526 | 17 | 79269886  | SLC38A10 | 4 | EGFR, ALK, KRAS and pan-negative |
| cg12432709 | 18 | 52627333  | CCDC68   | 4 | EGFR, ALK, KRAS and pan-negative |
| cg15191648 | 18 | 76740262  | SALL3    | 4 | EGFR, ALK, KRAS and pan-negative |
| cg09643544 | 19 | 9473696   | ZNF177   | 4 | EGFR, ALK, KRAS and pan-negative |
| cg22187630 | 19 | 13616871  | CACNA1A  | 4 | EGFR, ALK, KRAS and pan-negative |
| cg26986236 | 19 | 34855715  | GPI      | 4 | EGFR, ALK, KRAS and pan-negative |
| cg14166009 | 19 | 37825309  | HKR1     | 4 | EGFR, ALK, KRAS and pan-negative |
| cg03975694 | 19 | 38042472  | ZNF540   | 4 | EGFR, ALK, KRAS and pan-negative |
| cg26200585 | 19 | 40919245  | PRX      | 4 | EGFR, ALK, KRAS and pan-negative |
| cg16708981 | 19 | 53758609  | ZNF677   | 4 | EGFR, ALK, KRAS and pan-negative |
| cg05508084 | 19 | 56988398  | ZNF667   | 4 | EGFR, ALK, KRAS and pan-negative |
| cg21331821 | 19 | 58545149  | ZSCAN1   | 4 | EGFR, ALK, KRAS and pan-negative |
| cg16638540 | 19 | 58570468  | ZNF135   | 4 | EGFR, ALK, KRAS and pan-negative |
| cg15127733 | 20 | 3713584   | HSPA12B  | 4 | EGFR, ALK, KRAS and pan-negative |
| cg25993718 | 20 | 54580196  | CBLN4    | 4 | EGFR, ALK, KRAS and pan-negative |
| cg09964921 | 21 | 35885767  | KCNE1    | 4 | EGFR, ALK, KRAS and pan-negative |
| cg06958537 | 21 | 40176950  | ETS2     | 4 | EGFR, ALK, KRAS and pan-negative |
| cg17398613 | 21 | 43919853  | SLC37A1  | 4 | EGFR, ALK, KRAS and pan-negative |
| cg02994956 | 22 | 29876534  | NEFH     | 4 | EGFR, ALK, KRAS and pan-negative |
| cg04081402 | 22 | 31003587  | TCN2     | 4 | EGFR, ALK, KRAS and pan-negative |
| cg18533225 | 22 | 50986813  | KLHDC7B  | 4 | EGFR, ALK, KRAS and pan-negative |
| cg12869058 | 1  | 94587872  | ABCA4    | 4 | EGFR, ALK, ROS1 and pan-negative |
| cg26366091 | 1  | 111770274 | CHI3L2   | 4 | EGFR, ALK, ROS1 and pan-negative |
| cg11935147 | 1  | 145075831 | PDE4DIP  | 4 | EGFR, ALK, ROS1 and pan-negative |
| cg26894575 | 1  | 153518054 | S100A4   | 4 | EGFR, ALK, ROS1 and pan-negative |
| cg14265075 | 1  | 157016521 | ARHGEF11 | 4 | EGFR, ALK, ROS1 and pan-negative |
| cg07837085 | 1  | 160708990 | SLAMF7   | 4 | EGFR, ALK, ROS1 and pan-negative |
| cg10106388 | 1  | 160832662 | CD244    | 4 | EGFR, ALK, ROS1 and pan-negative |
| cg01459453 | 1  | 169599212 | SELP     | 4 | EGFR, ALK, ROS1 and pan-negative |
| cg13449778 | 1  | 179712298 | FAM163A  | 4 | EGFR, ALK, ROS1 and pan-negative |
| cg25781162 | 2  | 44065996  | ABCG5    | 4 | EGFR, ALK, ROS1 and pan-negative |
| cg15781838 | 2  | 128422717 | LIMS2    | 4 | EGFR, ALK, ROS1 and pan-negative |
| cg07455975 | 2  | 175112849 | OLA1     | 4 | EGFR, ALK, ROS1 and pan-negative |
| cg10957151 | 2  | 176986956 | HOXD9    | 4 | EGFR, ALK, ROS1 and pan-negative |
| cg01152019 | 2  | 177015044 | MIR10B   | 4 | EGFR, ALK, ROS1 and pan-negative |
| cg00005847 | 2  | 177029073 | HOXD3    | 4 | EGFR, ALK, ROS1 and pan-negative |
| cg03270167 | 2  | 238768916 | RAMP1    | 4 | EGFR, ALK, ROS1 and pan-negative |
| cg08319404 | 3  | 24537435  | THRB     | 4 | EGFR, ALK, ROS1 and pan-negative |
| cg04569233 | 3  | 39321449  | CX3CR1   | 4 | EGFR, ALK, ROS1 and pan-negative |
| cg21458907 | 3  | 62860802  | CADPS    | 4 | EGFR, ALK, ROS1 and pan-negative |
| cg21995126 | 3  | 165555262 | BCHE     | 4 | EGFR, ALK, ROS1 and pan-negative |
| cg18741908 | 3  | 169756818 | GPR160   | 4 | EGFR, ALK, ROS1 and pan-negative |
| cg02630888 | 4  | 15657820  | FBXL5    | 4 | EGFR, ALK, ROS1 and pan-negative |
| cg07780979 | 5  | 303287    | AHRR     | 4 | EGFR, ALK, ROS1 and pan-negative |
| cg15128898 | 5  | 35618029  | SPEF2    | 4 | EGFR, ALK, ROS1 and pan-negative |
| cg07086380 | 5  | 118691033 | TNFAIP8  | 4 | EGFR, ALK, ROS1 and pan-negative |
| cg27541541 | 6  | 22298146  | PRL      | 4 | EGFR, ALK, ROS1 and pan-negative |
| cg16009558 | 6  | 101846707 | GRIK2    | 4 | EGFR, ALK, ROS1 and pan-negative |
| cg04317399 | 7  | 27170313  | HOXA4    | 4 | EGFR, ALK, ROS1 and pan-negative |
| cg24169822 | 7  | 27170994  | HOXA4    | 4 | EGFR, ALK, ROS1 and pan-negative |
| cg12128839 | 7  | 27183436  | HOXA5    | 4 | EGFR, ALK, ROS1 and pan-negative |
| cg06084117 | 7  | 132334901 | FLJ40288 | 4 | EGFR, ALK, ROS1 and pan-negative |
| cg19947621 | 9  | 34263021  | KIF24    | 4 | EGFR, ALK, ROS1 and pan-negative |
| cg24754277 | 9  | 90114156  | DAPK1    | 4 | EGFR, ALK, ROS1 and pan-negative |
| cg12953249 | 9  | 126118772 | CRB2     | 4 | EGFR, ALK, ROS1 and pan-negative |
| cg05441133 | 10 | 48416891  | GDF2     | 4 | EGFR, ALK, ROS1 and pan-negative |
| cg22545356 | 10 | 88716659  | MMRN2    | 4 | EGFR, ALK, ROS1 and pan-negative |
| cg06692050 | 10 | 99532398  | SFRP5    | 4 | EGFR, ALK, ROS1 and pan-negative |
| cg11204562 | 10 | 115511153 | PLEKHS1  | 4 | EGFR, ALK, ROS1 and pan-negative |
| cg10368842 | 10 | 115511504 | PLEKHS1  | 4 | EGFR, ALK, ROS1 and pan-negative |
| cg05064181 | 10 | 116445398 | ABLIM1   | 4 | EGFR, ALK, ROS1 and pan-negative |
| cg14607011 | 10 | 135171746 | FUOM     | 4 | EGFR, ALK, ROS1 and pan-negative |

|            |    |           |          |   |                                   |
|------------|----|-----------|----------|---|-----------------------------------|
| cg16873863 | 11 | 2921176   | SLC22A18 | 4 | EGFR, ALK, ROS1 and pan-negative  |
| cg13608094 | 11 | 69461236  | CCND1    | 4 | EGFR, ALK, ROS1 and pan-negative  |
| cg06531741 | 11 | 113775450 | HTR3B    | 4 | EGFR, ALK, ROS1 and pan-negative  |
| cg24441911 | 12 | 7280988   | RBP5     | 4 | EGFR, ALK, ROS1 and pan-negative  |
| cg07959477 | 12 | 10251879  | CLEC1A   | 4 | EGFR, ALK, ROS1 and pan-negative  |
| cg04228042 | 12 | 14996527  | ART4     | 4 | EGFR, ALK, ROS1 and pan-negative  |
| cg07123069 | 12 | 54367250  | HOXC11   | 4 | EGFR, ALK, ROS1 and pan-negative  |
| cg13634319 | 12 | 56323727  | DGKA     | 4 | EGFR, ALK, ROS1 and pan-negative  |
| cg12014417 | 12 | 123187920 | HCAR2    | 4 | EGFR, ALK, ROS1 and pan-negative  |
| cg24762359 | 13 | 25254447  | ATP12A   | 4 | EGFR, ALK, ROS1 and pan-negative  |
| cg18236477 | 13 | 26043066  | ATP8A2   | 4 | EGFR, ALK, ROS1 and pan-negative  |
| cg18401406 | 13 | 37247537  | SERTM1   | 4 | EGFR, ALK, ROS1 and pan-negative  |
| cg16692277 | 13 | 51640948  | GUCY1B2  | 4 | EGFR, ALK, ROS1 and pan-negative  |
| cg10549973 | 14 | 58863097  | TOMM20L  | 4 | EGFR, ALK, ROS1 and pan-negative  |
| cg16313343 | 14 | 105768109 | BRF1     | 4 | EGFR, ALK, ROS1 and pan-negative  |
| cg27169020 | 15 | 83954229  | BNC1     | 4 | EGFR, ALK, ROS1 and pan-negative  |
| cg26728422 | 16 | 1429015   | UNKL     | 4 | EGFR, ALK, ROS1 and pan-negative  |
| cg07059052 | 16 | 2828302   | TCEB2    | 4 | EGFR, ALK, ROS1 and pan-negative  |
| cg02510853 | 16 | 3031707   | PKMYT1   | 4 | EGFR, ALK, ROS1 and pan-negative  |
| cg20158248 | 16 | 16042956  | ABCC1    | 4 | EGFR, ALK, ROS1 and pan-negative  |
| cg13247990 | 16 | 46782176  | MYLK3    | 4 | EGFR, ALK, ROS1 and pan-negative  |
| cg04809787 | 17 | 7348339   | CHRNB1   | 4 | EGFR, ALK, ROS1 and pan-negative  |
| cg02337447 | 17 | 10602032  | ADPRM    | 4 | EGFR, ALK, ROS1 and pan-negative  |
| cg22485810 | 17 | 29248725  | ADAP2    | 4 | EGFR, ALK, ROS1 and pan-negative  |
| cg13376158 | 17 | 73128023  | NT5C     | 4 | EGFR, ALK, ROS1 and pan-negative  |
| cg03294491 | 18 | 45458243  | SMAD2    | 4 | EGFR, ALK, ROS1 and pan-negative  |
| cg02250594 | 18 | 55103353  | ONECUT2  | 4 | EGFR, ALK, ROS1 and pan-negative  |
| cg10521852 | 19 | 19739820  | LPAR2    | 4 | EGFR, ALK, ROS1 and pan-negative  |
| cg13301014 | 19 | 38754768  | SPINT2   | 4 | EGFR, ALK, ROS1 and pan-negative  |
| cg26060255 | 20 | 3025968   | MRPS26   | 4 | EGFR, ALK, ROS1 and pan-negative  |
| cg14564494 | 21 | 37506911  | CBR3     | 4 | EGFR, ALK, ROS1 and pan-negative  |
| cg05726109 | 22 | 19709755  | GP1BB    | 4 | EGFR, ALK, ROS1 and pan-negative  |
| cg00234616 | 2  | 74740572  | TLX2     | 4 | EGFR, ALK, HER2 and pan-negative  |
| cg13262687 | 4  | 147559579 | POU4F2   | 4 | EGFR, ALK, HER2 and pan-negative  |
| cg09786257 | 5  | 95768695  | PCSK1    | 4 | EGFR, ALK, HER2 and pan-negative  |
| cg25044651 | 5  | 115298720 | AQPEP    | 4 | EGFR, ALK, HER2 and pan-negative  |
| cg26282384 | 5  | 140767200 | PCDHGB4  | 4 | EGFR, ALK, HER2 and pan-negative  |
| cg16954341 | 6  | 25652381  | SCGN     | 4 | EGFR, ALK, HER2 and pan-negative  |
| cg06493994 | 6  | 25652602  | SCGN     | 4 | EGFR, ALK, HER2 and pan-negative  |
| cg24243265 | 8  | 130799851 | GSDMC    | 4 | EGFR, ALK, HER2 and pan-negative  |
| cg15748507 | 10 | 120354627 | PRLHR    | 4 | EGFR, ALK, HER2 and pan-negative  |
| cg20792294 | 11 | 2165425   | IGF2-AS  | 4 | EGFR, ALK, HER2 and pan-negative  |
| cg19064258 | 16 | 22826117  | HS3ST2   | 4 | EGFR, ALK, HER2 and pan-negative  |
| cg12448933 | 17 | 72667378  | RAB37    | 4 | EGFR, ALK, HER2 and pan-negative  |
| cg24101578 | 20 | 44880263  | CDH22    | 4 | EGFR, ALK, HER2 and pan-negative  |
| cg18888403 | 1  | 24152774  | HMGCL    | 4 | EGFR, KRAS, ROS1 and pan-negative |
| cg20903926 | 1  | 55271677  | C1orf177 | 4 | EGFR, KRAS, ROS1 and pan-negative |
| cg26963271 | 1  | 66259081  | PDE4B    | 4 | EGFR, KRAS, ROS1 and pan-negative |
| cg00392257 | 1  | 156696747 | ISG20L2  | 4 | EGFR, KRAS, ROS1 and pan-negative |
| cg02833725 | 1  | 156696768 | ISG20L2  | 4 | EGFR, KRAS, ROS1 and pan-negative |
| cg10636246 | 1  | 159046973 | AIM2     | 4 | EGFR, KRAS, ROS1 and pan-negative |
| cg22740835 | 1  | 162602559 | DDR2     | 4 | EGFR, KRAS, ROS1 and pan-negative |
| cg19220586 | 1  | 167522470 | CREG1    | 4 | EGFR, KRAS, ROS1 and pan-negative |
| cg23696949 | 1  | 183155644 | LAMC2    | 4 | EGFR, KRAS, ROS1 and pan-negative |
| cg23213217 | 1  | 224370155 | DEGS1    | 4 | EGFR, KRAS, ROS1 and pan-negative |
| cg03802191 | 1  | 234615169 | TARBP1   | 4 | EGFR, KRAS, ROS1 and pan-negative |
| cg07533148 | 1  | 248020812 | TRIM58   | 4 | EGFR, KRAS, ROS1 and pan-negative |
| cg12447832 | 2  | 3383257   | TRAPPC12 | 4 | EGFR, KRAS, ROS1 and pan-negative |
| cg04348872 | 2  | 25141696  | ADCY3    | 4 | EGFR, KRAS, ROS1 and pan-negative |
| cg26767897 | 2  | 31637348  | XDH      | 4 | EGFR, KRAS, ROS1 and pan-negative |
| cg23752985 | 2  | 85803571  | VAMP8    | 4 | EGFR, KRAS, ROS1 and pan-negative |
| cg16708281 | 2  | 114256673 | FOXO4L1  | 4 | EGFR, KRAS, ROS1 and pan-negative |
| cg26799474 | 2  | 202098951 | CASP8    | 4 | EGFR, KRAS, ROS1 and pan-negative |
| cg27091787 | 3  | 50360690  | HYAL2    | 4 | EGFR, KRAS, ROS1 and pan-negative |
| cg08785215 | 3  | 57993979  | FLNB     | 4 | EGFR, KRAS, ROS1 and pan-negative |
| cg06436504 | 3  | 99833735  | CMSS1    | 4 | EGFR, KRAS, ROS1 and pan-negative |
| cg21572897 | 3  | 119277821 | CD80     | 4 | EGFR, KRAS, ROS1 and pan-negative |
| cg03131527 | 3  | 197301250 | BDH1     | 4 | EGFR, KRAS, ROS1 and pan-negative |
| cg02131853 | 4  | 39034637  | TMEM156  | 4 | EGFR, KRAS, ROS1 and pan-negative |
| cg08647446 | 4  | 74486298  | RASSF6   | 4 | EGFR, KRAS, ROS1 and pan-negative |
| cg26215428 | 4  | 88928251  | PKD2     | 4 | EGFR, KRAS, ROS1 and pan-negative |
| cg15633390 | 4  | 99851211  | EIF4E    | 4 | EGFR, KRAS, ROS1 and pan-negative |
| cg03909500 | 5  | 33936597  | RXFP3    | 4 | EGFR, KRAS, ROS1 and pan-negative |
| cg03934354 | 5  | 34043140  | C1QTNF3  | 4 | EGFR, KRAS, ROS1 and pan-negative |
| cg18752880 | 5  | 34043509  | C1QTNF3  | 4 | EGFR, KRAS, ROS1 and pan-negative |
| cg15089387 | 5  | 110406661 | TSLP     | 4 | EGFR, KRAS, ROS1 and pan-negative |
| cg00489401 | 5  | 180075875 | FLT4     | 4 | EGFR, KRAS, ROS1 and pan-negative |
| cg05859264 | 6  | 36097692  | MAPK13   | 4 | EGFR, KRAS, ROS1 and pan-negative |
| cg27504991 | 6  | 43022209  | CUL7     | 4 | EGFR, KRAS, ROS1 and pan-negative |
| cg11540692 | 6  | 100912072 | SIM1     | 4 | EGFR, KRAS, ROS1 and pan-negative |
| cg13676215 | 7  | 17337976  | AHR      | 4 | EGFR, KRAS, ROS1 and pan-negative |
| cg07651914 | 7  | 100881986 | CLDN15   | 4 | EGFR, KRAS, ROS1 and pan-negative |
| cg14646244 | 7  | 107300287 | SLC26A4  | 4 | EGFR, KRAS, ROS1 and pan-negative |
| cg08744726 | 7  | 149323101 | ZNF767   | 4 | EGFR, KRAS, ROS1 and pan-negative |
| cg01072821 | 8  | 10382165  | PRSS55   | 4 | EGFR, KRAS, ROS1 and pan-negative |
| cg02919422 | 8  | 55370544  | SOX17    | 4 | EGFR, KRAS, ROS1 and pan-negative |
| cg10303487 | 8  | 105479058 | DPYS     | 4 | EGFR, KRAS, ROS1 and pan-negative |
| cg18410627 | 9  | 129677882 | RALGPS1  | 4 | EGFR, KRAS, ROS1 and pan-negative |
| cg14552982 | 9  | 133568226 | EXOSC2   | 4 | EGFR, KRAS, ROS1 and pan-negative |
| cg25802093 | 10 | 22634038  | SPAG6    | 4 | EGFR, KRAS, ROS1 and pan-negative |
| cg14008883 | 10 | 50818911  | SLC18A3  | 4 | EGFR, KRAS, ROS1 and pan-negative |
| cg19780563 | 10 | 94594494  | EXOC6    | 4 | EGFR, KRAS, ROS1 and pan-negative |
| cg08141873 | 11 | 534632    | HRAS     | 4 | EGFR, KRAS, ROS1 and pan-negative |
| cg02994974 | 11 | 13984544  | SPON1    | 4 | EGFR, KRAS, ROS1 and pan-negative |
| cg12611860 | 11 | 17191617  | PIK3C2A  | 4 | EGFR, KRAS, ROS1 and pan-negative |

|            |    |           |          |   |                                   |
|------------|----|-----------|----------|---|-----------------------------------|
| cg20018806 | 11 | 59633874  | TCN1     | 4 | EGFR, KRAS, ROS1 and pan-negative |
| cg17998964 | 11 | 63655903  | MARK2    | 4 | EGFR, KRAS, ROS1 and pan-negative |
| cg18818531 | 11 | 65668277  | FOSL1    | 4 | EGFR, KRAS, ROS1 and pan-negative |
| cg08876932 | 11 | 71955547  | PHOX2A   | 4 | EGFR, KRAS, ROS1 and pan-negative |
| cg27347104 | 12 | 6233657   | VWF      | 4 | EGFR, KRAS, ROS1 and pan-negative |
| cg04956511 | 12 | 7056008   | PTPN6    | 4 | EGFR, KRAS, ROS1 and pan-negative |
| cg09229912 | 12 | 111471963 | CUX2     | 4 | EGFR, KRAS, ROS1 and pan-negative |
| cg19789466 | 12 | 113344923 | OAS1     | 4 | EGFR, KRAS, ROS1 and pan-negative |
| cg21418052 | 13 | 31773806  | B3GALT1  | 4 | EGFR, KRAS, ROS1 and pan-negative |
| cg00708598 | 13 | 53313895  | LECT1    | 4 | EGFR, KRAS, ROS1 and pan-negative |
| cg20366906 | 13 | 53422381  | PCDH8    | 4 | EGFR, KRAS, ROS1 and pan-negative |
| cg07104706 | 13 | 84456127  | SLITRK1  | 4 | EGFR, KRAS, ROS1 and pan-negative |
| cg11208483 | 13 | 95364233  | SOX21    | 4 | EGFR, KRAS, ROS1 and pan-negative |
| cg22303211 | 13 | 112722171 | SOX1     | 4 | EGFR, KRAS, ROS1 and pan-negative |
| cg20822579 | 14 | 24809073  | RIPK3    | 4 | EGFR, KRAS, ROS1 and pan-negative |
| cg22881914 | 14 | 52536147  | NID2     | 4 | EGFR, KRAS, ROS1 and pan-negative |
| cg24989962 | 14 | 52734286  | PTGDR    | 4 | EGFR, KRAS, ROS1 and pan-negative |
| cg15645309 | 14 | 75988747  | BATF     | 4 | EGFR, KRAS, ROS1 and pan-negative |
| cg17412258 | 14 | 101193017 | DLK1     | 4 | EGFR, KRAS, ROS1 and pan-negative |
| cg00792849 | 15 | 35046610  | GJD2     | 4 | EGFR, KRAS, ROS1 and pan-negative |
| cg19988449 | 15 | 83952808  | BNC1     | 4 | EGFR, KRAS, ROS1 and pan-negative |
| cg19091641 | 16 | 21223674  | ZIP2     | 4 | EGFR, KRAS, ROS1 and pan-negative |
| cg02989940 | 16 | 31539234  | AHSP     | 4 | EGFR, KRAS, ROS1 and pan-negative |
| cg11998307 | 17 | 1549434   | SCARF1   | 4 | EGFR, KRAS, ROS1 and pan-negative |
| cg05790038 | 17 | 3461143   | TRPV3    | 4 | EGFR, KRAS, ROS1 and pan-negative |
| cg23033845 | 17 | 7758662   | TMEM88   | 4 | EGFR, KRAS, ROS1 and pan-negative |
| cg26673195 | 17 | 41052729  | G6PC     | 4 | EGFR, KRAS, ROS1 and pan-negative |
| cg12559031 | 17 | 48046365  | DLX4     | 4 | EGFR, KRAS, ROS1 and pan-negative |
| cg18536148 | 17 | 59533844  | TBX4     | 4 | EGFR, KRAS, ROS1 and pan-negative |
| cg15177359 | 17 | 73840750  | UNC13D   | 4 | EGFR, KRAS, ROS1 and pan-negative |
| cg04947157 | 17 | 76128481  | TMC6     | 4 | EGFR, KRAS, ROS1 and pan-negative |
| cg26721264 | 18 | 74961727  | GALR1    | 4 | EGFR, KRAS, ROS1 and pan-negative |
| cg26482939 | 19 | 3136710   | GNA15    | 4 | EGFR, KRAS, ROS1 and pan-negative |
| cg02806777 | 19 | 46526317  | PGLYRP1  | 4 | EGFR, KRAS, ROS1 and pan-negative |
| cg06151165 | 20 | 25062254  | VSX1     | 4 | EGFR, KRAS, ROS1 and pan-negative |
| cg10217445 | 21 | 34397784  | OLIG2    | 4 | EGFR, KRAS, ROS1 and pan-negative |
| cg17274064 | 21 | 40033892  | ERG      | 4 | EGFR, KRAS, ROS1 and pan-negative |
| cg21513553 | 21 | 47518637  | COL6A2   | 4 | EGFR, KRAS, ROS1 and pan-negative |
| cg16993794 | 22 | 24199328  | SLC2A11  | 4 | EGFR, KRAS, ROS1 and pan-negative |
| cg26050734 | 1  | 151689032 | CELF3    | 4 | EGFR, KRAS, HER2 and pan-negative |
| cg27549944 | 1  | 204328843 | PLEKHA6  | 4 | EGFR, KRAS, HER2 and pan-negative |
| cg11657808 | 1  | 237205950 | RYR2     | 4 | EGFR, KRAS, HER2 and pan-negative |
| cg20028470 | 2  | 27530829  | UCN      | 4 | EGFR, KRAS, HER2 and pan-negative |
| cg08251399 | 2  | 31457608  | EHD3     | 4 | EGFR, KRAS, HER2 and pan-negative |
| cg07175883 | 2  | 176957908 | HOXD13   | 4 | EGFR, KRAS, HER2 and pan-negative |
| cg23130254 | 2  | 176964588 | HOXD12   | 4 | EGFR, KRAS, HER2 and pan-negative |
| cg04072323 | 2  | 229046325 | SPHKAP   | 4 | EGFR, KRAS, HER2 and pan-negative |
| cg07442479 | 5  | 37839769  | GDNF     | 4 | EGFR, KRAS, HER2 and pan-negative |
| cg14859460 | 5  | 178422244 | GRM6     | 4 | EGFR, KRAS, HER2 and pan-negative |
| cg17267907 | 8  | 6838024   | DEFA1B   | 4 | EGFR, KRAS, HER2 and pan-negative |
| cg18674980 | 8  | 86350581  | CA3      | 4 | EGFR, KRAS, HER2 and pan-negative |
| cg20792062 | 12 | 5153288   | KCNA5    | 4 | EGFR, KRAS, HER2 and pan-negative |
| cg22471346 | 17 | 10101473  | GAS7     | 4 | EGFR, KRAS, HER2 and pan-negative |
| cg19576304 | 18 | 56940022  | RAX      | 4 | EGFR, KRAS, HER2 and pan-negative |
| cg12699371 | 18 | 74961424  | GALR1    | 4 | EGFR, KRAS, HER2 and pan-negative |
| cg10486998 | 18 | 74961787  | GALR1    | 4 | EGFR, KRAS, HER2 and pan-negative |
| cg17525406 | 1  | 4715520   | AJAP1    | 4 | EGFR, ROS1, HER2 and pan-negative |
| cg11946503 | 5  | 134870514 | NEUROG1  | 4 | EGFR, ROS1, HER2 and pan-negative |
| cg14144305 | 11 | 44325960  | ALX4     | 4 | EGFR, ROS1, HER2 and pan-negative |
| cg22143352 | 14 | 75897841  | JDP2     | 4 | EGFR, ROS1, HER2 and pan-negative |
| cg17385448 | 1  | 15911702  | AGMAT    | 3 | EGFR, ALK and pan-negative        |
| cg00433406 | 1  | 20616975  | VWA5B1   | 3 | EGFR, ALK and pan-negative        |
| cg06377278 | 1  | 25256369  | RUNX3    | 3 | EGFR, ALK and pan-negative        |
| cg18107827 | 1  | 26488988  | FAM110D  | 3 | EGFR, ALK and pan-negative        |
| cg20367961 | 1  | 41950237  | EDN2     | 3 | EGFR, ALK and pan-negative        |
| cg01095482 | 1  | 43765796  | TIE1     | 3 | EGFR, ALK and pan-negative        |
| cg06710648 | 1  | 58716377  | DAB1     | 3 | EGFR, ALK and pan-negative        |
| cg22815110 | 1  | 63788933  | FOXD3    | 3 | EGFR, ALK and pan-negative        |
| cg20059151 | 1  | 95286311  | SLC44A3  | 3 | EGFR, ALK and pan-negative        |
| cg26117431 | 1  | 100643544 | LRRC39   | 3 | EGFR, ALK and pan-negative        |
| cg00916635 | 1  | 114414312 | PTPN22   | 3 | EGFR, ALK and pan-negative        |
| cg02173484 | 1  | 147245168 | GJA5     | 3 | EGFR, ALK and pan-negative        |
| cg20767356 | 1  | 150693100 | HORMAD1  | 3 | EGFR, ALK and pan-negative        |
| cg25856811 | 1  | 152973957 | SPRR3    | 3 | EGFR, ALK and pan-negative        |
| cg27138018 | 1  | 156589303 | HAPLN2   | 3 | EGFR, ALK and pan-negative        |
| cg00101227 | 1  | 161280266 | MPZ      | 3 | EGFR, ALK and pan-negative        |
| cg08047907 | 1  | 169396858 | CCDC181  | 3 | EGFR, ALK and pan-negative        |
| cg14721213 | 1  | 171154612 | FMO2     | 3 | EGFR, ALK and pan-negative        |
| cg19589427 | 1  | 173019720 | TNFSF18  | 3 | EGFR, ALK and pan-negative        |
| cg09656934 | 1  | 179561500 | TDRD5    | 3 | EGFR, ALK and pan-negative        |
| cg02314308 | 1  | 184006972 | COLGALT2 | 3 | EGFR, ALK and pan-negative        |
| cg23557926 | 1  | 196620963 | CFH      | 3 | EGFR, ALK and pan-negative        |
| cg22815214 | 1  | 201083145 | ASCL5    | 3 | EGFR, ALK and pan-negative        |
| cg03625911 | 1  | 203155737 | CH3L1    | 3 | EGFR, ALK and pan-negative        |
| cg24309555 | 2  | 21266956  | APOB     | 3 | EGFR, ALK and pan-negative        |
| cg01753375 | 2  | 74607600  | DCTN1    | 3 | EGFR, ALK and pan-negative        |
| cg20775254 | 2  | 95940705  | PROM2    | 3 | EGFR, ALK and pan-negative        |
| cg17142183 | 2  | 102608192 | IL1R2    | 3 | EGFR, ALK and pan-negative        |
| cg20340242 | 2  | 102608349 | IL1R2    | 3 | EGFR, ALK and pan-negative        |
| cg07935264 | 2  | 113594375 | IL1B     | 3 | EGFR, ALK and pan-negative        |
| cg07785936 | 2  | 133174635 | GPR39    | 3 | EGFR, ALK and pan-negative        |
| cg16652259 | 2  | 172949501 | DLX1     | 3 | EGFR, ALK and pan-negative        |
| cg03918304 | 2  | 176981654 | HOXD10   | 3 | EGFR, ALK and pan-negative        |
| cg21815667 | 2  | 176993841 | HOXD8    | 3 | EGFR, ALK and pan-negative        |
| cg00767581 | 2  | 177015125 | MIR10B   | 3 | EGFR, ALK and pan-negative        |

|            |    |           |           |   |                            |
|------------|----|-----------|-----------|---|----------------------------|
| cg27248887 | 2  | 207025417 | EEF1B2    | 3 | EGFR, ALK and pan-negative |
| cg13531460 | 2  | 231790813 | GPR55     | 3 | EGFR, ALK and pan-negative |
| cg02932167 | 2  | 233352951 | ECEL1     | 3 | EGFR, ALK and pan-negative |
| cg01798589 | 3  | 36421572  | STAC      | 3 | EGFR, ALK and pan-negative |
| cg15261665 | 3  | 46506374  | LTF       | 3 | EGFR, ALK and pan-negative |
| cg17527798 | 3  | 46506404  | LTF       | 3 | EGFR, ALK and pan-negative |
| cg06621358 | 3  | 48699637  | CELSR3    | 3 | EGFR, ALK and pan-negative |
| cg11532513 | 3  | 54962242  | LRTM1     | 3 | EGFR, ALK and pan-negative |
| cg19574488 | 3  | 61236547  | FHIT      | 3 | EGFR, ALK and pan-negative |
| cg24505341 | 3  | 62861544  | CADPS     | 3 | EGFR, ALK and pan-negative |
| cg23967169 | 3  | 68981503  | FAM19A4   | 3 | EGFR, ALK and pan-negative |
| cg25298754 | 3  | 111314102 | ZBED2     | 3 | EGFR, ALK and pan-negative |
| cg05062178 | 3  | 124605247 | ITGB5     | 3 | EGFR, ALK and pan-negative |
| cg03199651 | 4  | 4862770   | MSX1      | 3 | EGFR, ALK and pan-negative |
| cg03544320 | 4  | 5894691   | CRMP1     | 3 | EGFR, ALK and pan-negative |
| cg22680204 | 4  | 5895098   | CRMP1     | 3 | EGFR, ALK and pan-negative |
| cg21279601 | 4  | 9782931   | DRD5      | 3 | EGFR, ALK and pan-negative |
| cg19712821 | 4  | 15965016  | FGFBP2    | 3 | EGFR, ALK and pan-negative |
| cg24715245 | 4  | 41258794  | UCHL1-AS1 | 3 | EGFR, ALK and pan-negative |
| cg24402880 | 4  | 84035837  | PLAC8     | 3 | EGFR, ALK and pan-negative |
| cg10539507 | 4  | 85420782  | NKX6-1    | 3 | EGFR, ALK and pan-negative |
| cg03005261 | 4  | 110480828 | CCDC109B  | 3 | EGFR, ALK and pan-negative |
| cg17214107 | 4  | 123747542 | FGF2      | 3 | EGFR, ALK and pan-negative |
| cg05774801 | 4  | 154709756 | SFRP2     | 3 | EGFR, ALK and pan-negative |
| cg04517429 | 4  | 155413618 | DCHS2     | 3 | EGFR, ALK and pan-negative |
| cg13958614 | 5  | 72744196  | FOXD1     | 3 | EGFR, ALK and pan-negative |
| cg14012294 | 5  | 72794041  | BTf3      | 3 | EGFR, ALK and pan-negative |
| cg18110483 | 5  | 79330959  | THBS4     | 3 | EGFR, ALK and pan-negative |
| cg20714328 | 5  | 79331850  | THBS4     | 3 | EGFR, ALK and pan-negative |
| cg23187653 | 5  | 95769008  | PCSK1     | 3 | EGFR, ALK and pan-negative |
| cg01512854 | 5  | 140480967 | PCDHB3    | 3 | EGFR, ALK and pan-negative |
| cg11864993 | 5  | 140559832 | PCDHB16   | 3 | EGFR, ALK and pan-negative |
| cg00911351 | 5  | 140767255 | PCDHGB4   | 3 | EGFR, ALK and pan-negative |
| cg11647681 | 5  | 140810161 | PCDHGA12  | 3 | EGFR, ALK and pan-negative |
| cg23303408 | 5  | 145718597 | POU4F3    | 3 | EGFR, ALK and pan-negative |
| cg09220361 | 5  | 161494515 | GABRG2    | 3 | EGFR, ALK and pan-negative |
| cg19885761 | 5  | 175223646 | CPLX2     | 3 | EGFR, ALK and pan-negative |
| cg14709481 | 5  | 176325836 | HK3       | 3 | EGFR, ALK and pan-negative |
| cg15674997 | 5  | 178421314 | GRM6      | 3 | EGFR, ALK and pan-negative |
| cg05414338 | 6  | 26250347  | 0         | 3 | EGFR, ALK and pan-negative |
| cg06254453 | 6  | 26250350  | 0         | 3 | EGFR, ALK and pan-negative |
| cg21663122 | 6  | 26250936  | HIST1H3F  | 3 | EGFR, ALK and pan-negative |
| cg05598246 | 6  | 29624414  | MOG       | 3 | EGFR, ALK and pan-negative |
| cg05345286 | 6  | 41606641  | MDFI      | 3 | EGFR, ALK and pan-negative |
| cg04595372 | 6  | 49681233  | CRISP2    | 3 | EGFR, ALK and pan-negative |
| cg08942800 | 6  | 49681310  | CRISP2    | 3 | EGFR, ALK and pan-negative |
| cg19697981 | 6  | 108487820 | NR2E1     | 3 | EGFR, ALK and pan-negative |
| cg03160135 | 6  | 117586918 | VGLL2     | 3 | EGFR, ALK and pan-negative |
| cg04481779 | 6  | 137366125 | IL20RA    | 3 | EGFR, ALK and pan-negative |
| cg27316956 | 6  | 152958899 | SYNE1     | 3 | EGFR, ALK and pan-negative |
| cg05836145 | 7  | 20827117  | SP8       | 3 | EGFR, ALK and pan-negative |
| cg01770232 | 7  | 22766155  | IL6       | 3 | EGFR, ALK and pan-negative |
| cg17950095 | 7  | 27224700  | HOXA11    | 3 | EGFR, ALK and pan-negative |
| cg08005849 | 7  | 81399399  | HGF       | 3 | EGFR, ALK and pan-negative |
| cg18873386 | 7  | 96651915  | DLX5      | 3 | EGFR, ALK and pan-negative |
| cg06537230 | 7  | 96653183  | DLX5      | 3 | EGFR, ALK and pan-negative |
| cg16924616 | 7  | 96653617  | DLX5      | 3 | EGFR, ALK and pan-negative |
| cg00548268 | 7  | 98245830  | NPTX2     | 3 | EGFR, ALK and pan-negative |
| cg00292971 | 7  | 143060536 | FAM131B   | 3 | EGFR, ALK and pan-negative |
| cg19831077 | 7  | 151107924 | WDR86     | 3 | EGFR, ALK and pan-negative |
| cg24056567 | 8  | 18871909  | PSD3      | 3 | EGFR, ALK and pan-negative |
| cg01281904 | 8  | 54164757  | OPRK1     | 3 | EGFR, ALK and pan-negative |
| cg03973663 | 8  | 56791576  | LYN       | 3 | EGFR, ALK and pan-negative |
| cg17347634 | 8  | 65711916  | CYP7B1    | 3 | EGFR, ALK and pan-negative |
| cg17449882 | 8  | 67406020  | C8orf46   | 3 | EGFR, ALK and pan-negative |
| cg22289837 | 8  | 86350278  | CA3       | 3 | EGFR, ALK and pan-negative |
| cg17788832 | 8  | 87081654  | PSKH2     | 3 | EGFR, ALK and pan-negative |
| cg19007731 | 8  | 93107394  | RUNX1T1   | 3 | EGFR, ALK and pan-negative |
| cg11536940 | 8  | 97658076  | CPQ       | 3 | EGFR, ALK and pan-negative |
| cg06821993 | 8  | 114449011 | CSMD3     | 3 | EGFR, ALK and pan-negative |
| cg26490372 | 8  | 125552608 | NDUFB9    | 3 | EGFR, ALK and pan-negative |
| cg13784855 | 8  | 128806938 | MIR1204   | 3 | EGFR, ALK and pan-negative |
| cg24641352 | 8  | 144328078 | ZFP41     | 3 | EGFR, ALK and pan-negative |
| cg09155025 | 8  | 145642024 | SLC39A4   | 3 | EGFR, ALK and pan-negative |
| cg21504624 | 9  | 34653580  | IL11RA    | 3 | EGFR, ALK and pan-negative |
| cg11880010 | 9  | 79328644  | PRUNE2    | 3 | EGFR, ALK and pan-negative |
| cg11546621 | 9  | 139872161 | PTGDS     | 3 | EGFR, ALK and pan-negative |
| cg04837071 | 9  | 140318649 | NOXA1     | 3 | EGFR, ALK and pan-negative |
| cg19118077 | 10 | 5137178   | AKR1C3    | 3 | EGFR, ALK and pan-negative |
| cg05755354 | 10 | 14372596  | FRMD4A    | 3 | EGFR, ALK and pan-negative |
| cg01861509 | 10 | 73849626  | SPOCK2    | 3 | EGFR, ALK and pan-negative |
| cg20831708 | 10 | 102279373 | SEC31B    | 3 | EGFR, ALK and pan-negative |
| cg16715722 | 10 | 102890296 | TLX1NB    | 3 | EGFR, ALK and pan-negative |
| cg13548361 | 10 | 104178949 | PSD       | 3 | EGFR, ALK and pan-negative |
| cg25524473 | 10 | 112258394 | DUSP5     | 3 | EGFR, ALK and pan-negative |
| cg14826456 | 10 | 115804095 | ADRB1     | 3 | EGFR, ALK and pan-negative |
| cg17349199 | 10 | 118429452 | C10orf82  | 3 | EGFR, ALK and pan-negative |
| cg03522063 | 10 | 119302167 | EMX2      | 3 | EGFR, ALK and pan-negative |
| cg16196812 | 10 | 120355139 | PRLHR     | 3 | EGFR, ALK and pan-negative |
| cg09619146 | 10 | 125651034 | CPXM2     | 3 | EGFR, ALK and pan-negative |
| cg03630088 | 10 | 125651526 | CPXM2     | 3 | EGFR, ALK and pan-negative |
| cg02941816 | 10 | 131265696 | MGMT      | 3 | EGFR, ALK and pan-negative |
| cg07295678 | 10 | 134000009 | DPYSL4    | 3 | EGFR, ALK and pan-negative |
| cg03743584 | 10 | 135160908 | PRAP1     | 3 | EGFR, ALK and pan-negative |
| cg08961832 | 11 | 279185    | NLRP6     | 3 | EGFR, ALK and pan-negative |

|            |    |           |           |   |                            |
|------------|----|-----------|-----------|---|----------------------------|
| cg14967066 | 11 | 314341    | IFITM1    | 3 | EGFR, ALK and pan-negative |
| cg12907644 | 11 | 18270341  | SAA2      | 3 | EGFR, ALK and pan-negative |
| cg15484375 | 11 | 18287647  | SAA1      | 3 | EGFR, ALK and pan-negative |
| cg25094569 | 11 | 32448769  | WT1       | 3 | EGFR, ALK and pan-negative |
| cg12006284 | 11 | 32449638  | WT1       | 3 | EGFR, ALK and pan-negative |
| cg04456238 | 11 | 32450104  | WT1       | 3 | EGFR, ALK and pan-negative |
| cg16463460 | 11 | 32454718  | WT1       | 3 | EGFR, ALK and pan-negative |
| cg11260848 | 11 | 44326260  | ALX4      | 3 | EGFR, ALK and pan-negative |
| cg26637069 | 11 | 57004294  | APLNR     | 3 | EGFR, ALK and pan-negative |
| cg07221454 | 11 | 60552841  | MS4A10    | 3 | EGFR, ALK and pan-negative |
| cg07339327 | 11 | 69461109  | CCND1     | 3 | EGFR, ALK and pan-negative |
| cg04396791 | 11 | 70508180  | SHANK2    | 3 | EGFR, ALK and pan-negative |
| cg26750747 | 11 | 71899966  | FOLR1     | 3 | EGFR, ALK and pan-negative |
| cg25511807 | 11 | 102401438 | MMP7      | 3 | EGFR, ALK and pan-negative |
| cg08596000 | 11 | 104035204 | PDGFD     | 3 | EGFR, ALK and pan-negative |
| cg12508624 | 11 | 119293780 | THY1      | 3 | EGFR, ALK and pan-negative |
| cg19096475 | 11 | 123066529 | CLMP      | 3 | EGFR, ALK and pan-negative |
| cg24625128 | 11 | 133939064 | JAM3      | 3 | EGFR, ALK and pan-negative |
| cg12058490 | 12 | 92683379  | A2M       | 3 | EGFR, ALK and pan-negative |
| cg13354523 | 12 | 10251574  | CLEC1A    | 3 | EGFR, ALK and pan-negative |
| cg26066361 | 12 | 10282621  | CLEC7A    | 3 | EGFR, ALK and pan-negative |
| cg02813863 | 12 | 12938287  | APOLD1    | 3 | EGFR, ALK and pan-negative |
| cg15820955 | 12 | 48192939  | HDAC7     | 3 | EGFR, ALK and pan-negative |
| cg23640701 | 12 | 52301634  | ACVRL1    | 3 | EGFR, ALK and pan-negative |
| cg08900043 | 12 | 54378896  | HOXC10    | 3 | EGFR, ALK and pan-negative |
| cg21272774 | 12 | 54393725  | HOXC9     | 3 | EGFR, ALK and pan-negative |
| cg16521028 | 12 | 75874414  | GLIPR1    | 3 | EGFR, ALK and pan-negative |
| cg03064067 | 12 | 85306916  | SLC6A15   | 3 | EGFR, ALK and pan-negative |
| cg14116122 | 12 | 85673884  | ALX1      | 3 | EGFR, ALK and pan-negative |
| cg09813840 | 12 | 109027422 | SELPLG    | 3 | EGFR, ALK and pan-negative |
| cg23801057 | 12 | 121569969 | P2RX7     | 3 | EGFR, ALK and pan-negative |
| cg24664957 | 12 | 123381003 | VPS37B    | 3 | EGFR, ALK and pan-negative |
| cg11054936 | 13 | 20766170  | GJB2      | 3 | EGFR, ALK and pan-negative |
| cg02055963 | 13 | 28543520  | CDX2      | 3 | EGFR, ALK and pan-negative |
| cg08097882 | 13 | 79177516  | POU4F1    | 3 | EGFR, ALK and pan-negative |
| cg03623878 | 13 | 113655560 | MCF2L     | 3 | EGFR, ALK and pan-negative |
| cg09112782 | 13 | 115047484 | UPF3A     | 3 | EGFR, ALK and pan-negative |
| cg12062492 | 14 | 24423140  | DHRS4     | 3 | EGFR, ALK and pan-negative |
| cg20812929 | 14 | 24458345  | DHRS4L2   | 3 | EGFR, ALK and pan-negative |
| cg22918700 | 14 | 24600067  | ITIM1     | 3 | EGFR, ALK and pan-negative |
| cg03875678 | 14 | 25103546  | GZMB      | 3 | EGFR, ALK and pan-negative |
| cg04784672 | 14 | 42077674  | LRFN5     | 3 | EGFR, ALK and pan-negative |
| cg13282837 | 14 | 96180648  | TCL1A     | 3 | EGFR, ALK and pan-negative |
| cg09873258 | 14 | 101192894 | DLK1      | 3 | EGFR, ALK and pan-negative |
| cg10734665 | 15 | 26107410  | ATP10A    | 3 | EGFR, ALK and pan-negative |
| cg21053529 | 15 | 35046760  | GJD2      | 3 | EGFR, ALK and pan-negative |
| cg02329886 | 15 | 50557917  | HDC       | 3 | EGFR, ALK and pan-negative |
| cg16831889 | 15 | 50558051  | HDC       | 3 | EGFR, ALK and pan-negative |
| cg07084709 | 15 | 57883511  | MYZAP     | 3 | EGFR, ALK and pan-negative |
| cg08583049 | 15 | 60296815  | FOXB1     | 3 | EGFR, ALK and pan-negative |
| cg26416466 | 15 | 66546708  | MEGF11    | 3 | EGFR, ALK and pan-negative |
| cg00687674 | 15 | 69373260  | LINC00277 | 3 | EGFR, ALK and pan-negative |
| cg19328294 | 16 | 2908554   | PRSS22    | 3 | EGFR, ALK and pan-negative |
| cg01351032 | 16 | 10971191  | CIITA     | 3 | EGFR, ALK and pan-negative |
| cg00882451 | 16 | 21222863  | ZP2       | 3 | EGFR, ALK and pan-negative |
| cg13552869 | 16 | 29909924  | SEZ6L2    | 3 | EGFR, ALK and pan-negative |
| cg10316764 | 16 | 29984665  | TAOK2     | 3 | EGFR, ALK and pan-negative |
| cg14370448 | 16 | 30103978  | TBX6      | 3 | EGFR, ALK and pan-negative |
| cg23910243 | 16 | 31484618  | TGFB11    | 3 | EGFR, ALK and pan-negative |
| cg21960882 | 16 | 32264404  | TP53TG3D  | 3 | EGFR, ALK and pan-negative |
| cg00891541 | 16 | 68481487  | SMPD3     | 3 | EGFR, ALK and pan-negative |
| cg10556064 | 16 | 68481489  | SMPD3     | 3 | EGFR, ALK and pan-negative |
| cg19297232 | 16 | 68483021  | SMPD3     | 3 | EGFR, ALK and pan-negative |
| cg17217677 | 16 | 68483194  | SMPD3     | 3 | EGFR, ALK and pan-negative |
| cg03317245 | 17 | 3600514   | P2RX5     | 3 | EGFR, ALK and pan-negative |
| cg12951282 | 17 | 7018416   | ASGR2     | 3 | EGFR, ALK and pan-negative |
| cg12989650 | 17 | 8213328   | ARHGEF15  | 3 | EGFR, ALK and pan-negative |
| cg23352695 | 17 | 29648811  | EVI2A     | 3 | EGFR, ALK and pan-negative |
| cg22506453 | 17 | 39122753  | KRT39     | 3 | EGFR, ALK and pan-negative |
| cg20795913 | 17 | 40718830  | MLX       | 3 | EGFR, ALK and pan-negative |
| cg25882366 | 17 | 46622037  | HOXB-AS1  | 3 | EGFR, ALK and pan-negative |
| cg06760035 | 17 | 46655245  | HOXB4     | 3 | EGFR, ALK and pan-negative |
| cg02422694 | 17 | 46655790  | HOXB4     | 3 | EGFR, ALK and pan-negative |
| cg15979932 | 17 | 55980107  | CUEDC1    | 3 | EGFR, ALK and pan-negative |
| cg20247048 | 17 | 62972358  | AMZ2P1    | 3 | EGFR, ALK and pan-negative |
| cg27243140 | 17 | 72931664  | OTOP3     | 3 | EGFR, ALK and pan-negative |
| cg24697031 | 17 | 74023714  | EVPL      | 3 | EGFR, ALK and pan-negative |
| cg14165663 | 17 | 74070269  | GALR2     | 3 | EGFR, ALK and pan-negative |
| cg05140736 | 17 | 78195518  | SGSH      | 3 | EGFR, ALK and pan-negative |
| cg15913671 | 17 | 79304420  | TMEM105   | 3 | EGFR, ALK and pan-negative |
| cg21591452 | 17 | 79304628  | TMEM105   | 3 | EGFR, ALK and pan-negative |
| cg27285599 | 17 | 80798023  | ZNF750    | 3 | EGFR, ALK and pan-negative |
| cg17376813 | 19 | 750024    | MISP      | 3 | EGFR, ALK and pan-negative |
| cg23673107 | 19 | 11908712  | ZNF491    | 3 | EGFR, ALK and pan-negative |
| cg15078027 | 19 | 13858619  | CCDC130   | 3 | EGFR, ALK and pan-negative |
| cg03931808 | 19 | 14139099  | RLN3      | 3 | EGFR, ALK and pan-negative |
| cg09949775 | 19 | 18902107  | COMP      | 3 | EGFR, ALK and pan-negative |
| cg05976074 | 19 | 33716273  | SLC7A10   | 3 | EGFR, ALK and pan-negative |
| cg27442349 | 19 | 39389219  | NFKB1B    | 3 | EGFR, ALK and pan-negative |
| cg15937958 | 19 | 42947133  | CXCL17    | 3 | EGFR, ALK and pan-negative |
| cg09543783 | 19 | 47248096  | FKRP      | 3 | EGFR, ALK and pan-negative |
| cg03907174 | 19 | 50030461  | RCN3      | 3 | EGFR, ALK and pan-negative |
| cg06572160 | 19 | 50831901  | KCNC3     | 3 | EGFR, ALK and pan-negative |
| cg04080057 | 19 | 54495183  | CACNG6    | 3 | EGFR, ALK and pan-negative |
| cg14289985 | 19 | 57018848  | ZNF471    | 3 | EGFR, ALK and pan-negative |

|            |    |           |                     |   |                             |
|------------|----|-----------|---------------------|---|-----------------------------|
| cg24713204 | 19 | 57019373  | <i>ZNF471</i>       | 3 | EGFR, ALK and pan-negative  |
| cg16173067 | 20 | 1309722   | <i>SDCBP2</i>       | 3 | EGFR, ALK and pan-negative  |
| cg09614401 | 20 | 4229009   | <i>ADRA1D</i>       | 3 | EGFR, ALK and pan-negative  |
| cg01775265 | 20 | 31780882  | <i>BPIFA4P</i>      | 3 | EGFR, ALK and pan-negative  |
| cg23713742 | 20 | 34202721  | <i>SPAG4</i>        | 3 | EGFR, ALK and pan-negative  |
| cg02442161 | 20 | 43803637  | <i>PI3</i>          | 3 | EGFR, ALK and pan-negative  |
| cg15534366 | 20 | 59826207  | <i>CDH4</i>         | 3 | EGFR, ALK and pan-negative  |
| cg15310162 | 21 | 37852822  | <i>CLDN14</i>       | 3 | EGFR, ALK and pan-negative  |
| cg21241823 | 21 | 43300024  | <i>PRDM15</i>       | 3 | EGFR, ALK and pan-negative  |
| cg26608332 | 22 | 20861476  | <i>MED15</i>        | 3 | EGFR, ALK and pan-negative  |
| cg24820809 | 22 | 36019252  | <i>MB</i>           | 3 | EGFR, ALK and pan-negative  |
| cg07186138 | 22 | 39410396  | <i>APOBEC3C</i>     | 3 | EGFR, ALK and pan-negative  |
| cg00343092 | 22 | 43547974  | <i>TSPO</i>         | 3 | EGFR, ALK and pan-negative  |
| cg18883209 | 22 | 44394601  | <i>PARVB</i>        | 3 | EGFR, ALK and pan-negative  |
| cg24867501 | 22 | 50925337  | <i>MIOX</i>         | 3 | EGFR, ALK and pan-negative  |
| cg24895052 | 17 | 41909601  | <i>MPP3</i>         | 3 | EGFR, ALK and ROS1          |
| cg26128092 | 1  | 3567550   | <i>WRAP73</i>       | 3 | EGFR, KRAS and pan-negative |
| cg13631913 | 1  | 9600345   | <i>SLC25A33</i>     | 3 | EGFR, KRAS and pan-negative |
| cg18839416 | 1  | 12805849  | <i>C1orf158</i>     | 3 | EGFR, KRAS and pan-negative |
| cg17657618 | 1  | 15427654  | <i>KAZN</i>         | 3 | EGFR, KRAS and pan-negative |
| cg08477744 | 1  | 17308032  | <i>MFAP2</i>        | 3 | EGFR, KRAS and pan-negative |
| cg14356550 | 1  | 18808102  | <i>KLHDC7A</i>      | 3 | EGFR, KRAS and pan-negative |
| cg15613048 | 1  | 21044031  | <i>KIF17</i>        | 3 | EGFR, KRAS and pan-negative |
| cg20645065 | 1  | 21836138  | <i>ALPL</i>         | 3 | EGFR, KRAS and pan-negative |
| cg26991199 | 1  | 24307153  | <i>SRSF10</i>       | 3 | EGFR, KRAS and pan-negative |
| cg13804316 | 1  | 28286884  | <i>XKR8</i>         | 3 | EGFR, KRAS and pan-negative |
| cg24468890 | 1  | 32757294  | <i>HDAC1</i>        | 3 | EGFR, KRAS and pan-negative |
| cg20951444 | 1  | 33337112  | <i>FNDCE5</i>       | 3 | EGFR, KRAS and pan-negative |
| cg24109894 | 1  | 36108212  | <i>PSMB2</i>        | 3 | EGFR, KRAS and pan-negative |
| cg06165395 | 1  | 37500790  | <i>GRIK3</i>        | 3 | EGFR, KRAS and pan-negative |
| cg12128017 | 1  | 38230769  | <i>EPHA10</i>       | 3 | EGFR, KRAS and pan-negative |
| cg21243096 | 1  | 38511557  | <i>POU3F1</i>       | 3 | EGFR, KRAS and pan-negative |
| cg19797376 | 1  | 47695475  | <i>TAL1</i>         | 3 | EGFR, KRAS and pan-negative |
| cg15868302 | 1  | 47900327  | <i>FOXO2-AS1</i>    | 3 | EGFR, KRAS and pan-negative |
| cg10266490 | 1  | 55013709  | <i>ACOT11</i>       | 3 | EGFR, KRAS and pan-negative |
| cg24110050 | 1  | 67217853  | <i>TCF7L1</i>       | 3 | EGFR, KRAS and pan-negative |
| cg24496666 | 1  | 78511979  | <i>GIPC2</i>        | 3 | EGFR, KRAS and pan-negative |
| cg22074858 | 1  | 89488430  | <i>GBP3</i>         | 3 | EGFR, KRAS and pan-negative |
| cg02421543 | 1  | 93810826  | <i>LOC100131564</i> | 3 | EGFR, KRAS and pan-negative |
| cg10298815 | 1  | 101004474 | <i>GPR88</i>        | 3 | EGFR, KRAS and pan-negative |
| cg13619408 | 1  | 109756118 | <i>SARS</i>         | 3 | EGFR, KRAS and pan-negative |
| cg08307963 | 1  | 147245485 | <i>GJA5</i>         | 3 | EGFR, KRAS and pan-negative |
| cg23499956 | 1  | 153584920 | <i>S100A16</i>      | 3 | EGFR, KRAS and pan-negative |
| cg14467840 | 1  | 153600972 | <i>S100A1</i>       | 3 | EGFR, KRAS and pan-negative |
| cg25912717 | 1  | 155176951 | <i>THBS3</i>        | 3 | EGFR, KRAS and pan-negative |
| cg21475402 | 1  | 156612140 | <i>BCAN</i>         | 3 | EGFR, KRAS and pan-negative |
| cg25259754 | 1  | 157670220 | <i>FCRL3</i>        | 3 | EGFR, KRAS and pan-negative |
| cg09340639 | 1  | 157789662 | <i>FCRL1</i>        | 3 | EGFR, KRAS and pan-negative |
| cg17399166 | 1  | 158149795 | <i>CD1D</i>         | 3 | EGFR, KRAS and pan-negative |
| cg13817266 | 1  | 161494402 | <i>HSPA6</i>        | 3 | EGFR, KRAS and pan-negative |
| cg24650501 | 1  | 165324990 | <i>LMX1A</i>        | 3 | EGFR, KRAS and pan-negative |
| cg17095936 | 1  | 168250628 | <i>TBX19</i>        | 3 | EGFR, KRAS and pan-negative |
| cg21581873 | 1  | 204329307 | <i>PLEKHA6</i>      | 3 | EGFR, KRAS and pan-negative |
| cg16855929 | 1  | 231561414 | <i>EGLN1</i>        | 3 | EGFR, KRAS and pan-negative |
| cg21376883 | 1  | 236850232 | <i>ACTN2</i>        | 3 | EGFR, KRAS and pan-negative |
| cg20855565 | 1  | 248020350 | <i>TRIM58</i>       | 3 | EGFR, KRAS and pan-negative |
| cg08432727 | 2  | 5831722   | <i>SOX11</i>        | 3 | EGFR, KRAS and pan-negative |
| cg05404787 | 2  | 10281526  | <i>C2orf48</i>      | 3 | EGFR, KRAS and pan-negative |
| cg05782445 | 2  | 26915207  | <i>KCNK3</i>        | 3 | EGFR, KRAS and pan-negative |
| cg14424579 | 2  | 27274309  | <i>AGBL5</i>        | 3 | EGFR, KRAS and pan-negative |
| cg04527918 | 2  | 27531170  | <i>UCN</i>          | 3 | EGFR, KRAS and pan-negative |
| cg19502744 | 2  | 31805915  | <i>SRD5A2</i>       | 3 | EGFR, KRAS and pan-negative |
| cg14201617 | 2  | 47382452  | <i>C2orf61</i>      | 3 | EGFR, KRAS and pan-negative |
| cg02868123 | 2  | 79382913  | <i>0</i>            | 3 | EGFR, KRAS and pan-negative |
| cg24240626 | 2  | 79386720  | <i>REG3A</i>        | 3 | EGFR, KRAS and pan-negative |
| cg27342801 | 2  | 79387273  | <i>REG3A</i>        | 3 | EGFR, KRAS and pan-negative |
| cg00718513 | 2  | 89215272  | <i>0</i>            | 3 | EGFR, KRAS and pan-negative |
| cg27011193 | 2  | 91848204  | <i>LOC654342</i>    | 3 | EGFR, KRAS and pan-negative |
| cg21245652 | 2  | 95691051  | <i>MAL</i>          | 3 | EGFR, KRAS and pan-negative |
| cg26514942 | 2  | 103378506 | <i>TMEM182</i>      | 3 | EGFR, KRAS and pan-negative |
| cg25549459 | 2  | 105471252 | <i>POU3F3</i>       | 3 | EGFR, KRAS and pan-negative |
| cg10236239 | 2  | 108994514 | <i>SULT1C4</i>      | 3 | EGFR, KRAS and pan-negative |
| cg11206634 | 2  | 128458399 | <i>SFT2D3</i>       | 3 | EGFR, KRAS and pan-negative |
| cg21591742 | 2  | 176980998 | <i>HOXD10</i>       | 3 | EGFR, KRAS and pan-negative |
| cg18750960 | 2  | 177016417 | <i>HOXD4</i>        | 3 | EGFR, KRAS and pan-negative |
| cg16478145 | 2  | 188419830 | <i>TFPI</i>         | 3 | EGFR, KRAS and pan-negative |
| cg22774472 | 2  | 190044636 | <i>COL5A2</i>       | 3 | EGFR, KRAS and pan-negative |
| cg15998761 | 2  | 191300784 | <i>MFSO6</i>        | 3 | EGFR, KRAS and pan-negative |
| cg10124201 | 2  | 198650752 | <i>BOLL</i>         | 3 | EGFR, KRAS and pan-negative |
| cg17560332 | 2  | 198651303 | <i>BOLL</i>         | 3 | EGFR, KRAS and pan-negative |
| cg02833180 | 2  | 198815064 | <i>PLCL1</i>        | 3 | EGFR, KRAS and pan-negative |
| cg14419187 | 2  | 210637094 | <i>UNC80</i>        | 3 | EGFR, KRAS and pan-negative |
| cg21165909 | 2  | 211419938 | <i>CPS1</i>         | 3 | EGFR, KRAS and pan-negative |
| cg25596297 | 2  | 223162875 | <i>CCDC140</i>      | 3 | EGFR, KRAS and pan-negative |
| cg01447817 | 2  | 241630251 | <i>AQP12A</i>       | 3 | EGFR, KRAS and pan-negative |
| cg04415689 | 2  | 242128250 | <i>ANO7</i>         | 3 | EGFR, KRAS and pan-negative |
| cg16869108 | 3  | 10184319  | <i>VHL</i>          | 3 | EGFR, KRAS and pan-negative |
| cg20916523 | 3  | 10184584  | <i>VHL</i>          | 3 | EGFR, KRAS and pan-negative |
| cg14547335 | 3  | 10491247  | <i>ATP2B2</i>       | 3 | EGFR, KRAS and pan-negative |
| cg00201234 | 3  | 13590968  | <i>FBLN2</i>        | 3 | EGFR, KRAS and pan-negative |
| cg18267381 | 3  | 21792434  | <i>ZNF385D</i>      | 3 | EGFR, KRAS and pan-negative |
| cg05615150 | 3  | 35683815  | <i>ARPP21</i>       | 3 | EGFR, KRAS and pan-negative |
| cg15439078 | 3  | 46904643  | <i>MYL3</i>         | 3 | EGFR, KRAS and pan-negative |
| cg15988232 | 3  | 47621127  | <i>CSPG5</i>        | 3 | EGFR, KRAS and pan-negative |
| cg17217654 | 3  | 49058043  | <i>NDUFAF3</i>      | 3 | EGFR, KRAS and pan-negative |

|            |   |           |           |   |                             |
|------------|---|-----------|-----------|---|-----------------------------|
| cg03019000 | 3 | 51704351  | TEX264    | 3 | EGFR, KRAS and pan-negative |
| cg03329165 | 3 | 112052218 | CD200     | 3 | EGFR, KRAS and pan-negative |
| cg07054641 | 3 | 113160554 | WDR52     | 3 | EGFR, KRAS and pan-negative |
| cg14294758 | 3 | 116163694 | LSAMP     | 3 | EGFR, KRAS and pan-negative |
| cg25564800 | 3 | 122234134 | KPNA1     | 3 | EGFR, KRAS and pan-negative |
| cg13878010 | 3 | 123167276 | ADCY5     | 3 | EGFR, KRAS and pan-negative |
| cg03704024 | 3 | 129598923 | TMCC1     | 3 | EGFR, KRAS and pan-negative |
| cg01009664 | 3 | 129693613 | TRH       | 3 | EGFR, KRAS and pan-negative |
| cg16428251 | 3 | 137483479 | SOX14     | 3 | EGFR, KRAS and pan-negative |
| cg03811478 | 3 | 137483696 | SOX14     | 3 | EGFR, KRAS and pan-negative |
| cg00970325 | 3 | 142683176 | PAQR9     | 3 | EGFR, KRAS and pan-negative |
| cg14456683 | 3 | 147127010 | ZIC1      | 3 | EGFR, KRAS and pan-negative |
| cg11761535 | 3 | 149051031 | TM4SF18   | 3 | EGFR, KRAS and pan-negative |
| cg11812218 | 3 | 172166920 | GHSR      | 3 | EGFR, KRAS and pan-negative |
| cg16555388 | 3 | 172241216 | TNFSF10   | 3 | EGFR, KRAS and pan-negative |
| cg15105987 | 3 | 181430317 | SOX2      | 3 | EGFR, KRAS and pan-negative |
| cg08749917 | 3 | 186915320 | RTP1      | 3 | EGFR, KRAS and pan-negative |
| cg21269934 | 4 | 2060219   | NAT8L     | 3 | EGFR, KRAS and pan-negative |
| cg22980079 | 4 | 2627118   | FAM193A   | 3 | EGFR, KRAS and pan-negative |
| cg20163033 | 4 | 2627194   | FAM193A   | 3 | EGFR, KRAS and pan-negative |
| cg10235817 | 4 | 3768555   | ADRA2C    | 3 | EGFR, KRAS and pan-negative |
| cg14882700 | 4 | 4228571   | OTOP1     | 3 | EGFR, KRAS and pan-negative |
| cg20073553 | 4 | 13545291  | NKX3-2    | 3 | EGFR, KRAS and pan-negative |
| cg04301614 | 4 | 37585993  | C4orf19   | 3 | EGFR, KRAS and pan-negative |
| cg09067967 | 4 | 39529342  | UGDH-AS1  | 3 | EGFR, KRAS and pan-negative |
| cg00629217 | 4 | 54425349  | LNK1      | 3 | EGFR, KRAS and pan-negative |
| cg10409560 | 4 | 76481299  | C4orf26   | 3 | EGFR, KRAS and pan-negative |
| cg24432073 | 4 | 76555634  | CDKL2     | 3 | EGFR, KRAS and pan-negative |
| cg07958192 | 4 | 90033974  | TIGD2     | 3 | EGFR, KRAS and pan-negative |
| cg01471384 | 4 | 107957265 | DKK2      | 3 | EGFR, KRAS and pan-negative |
| cg26701826 | 4 | 108814604 | SGMS2     | 3 | EGFR, KRAS and pan-negative |
| cg14056644 | 4 | 111559105 | PITX2     | 3 | EGFR, KRAS and pan-negative |
| cg00015770 | 4 | 122302007 | QRFPF     | 3 | EGFR, KRAS and pan-negative |
| cg00136405 | 4 | 123542198 | IL21      | 3 | EGFR, KRAS and pan-negative |
| cg02955988 | 4 | 128885294 | C4orf29   | 3 | EGFR, KRAS and pan-negative |
| cg23587449 | 4 | 155663689 | LRAT      | 3 | EGFR, KRAS and pan-negative |
| cg11011938 | 5 | 9545976   | SEMA5A    | 3 | EGFR, KRAS and pan-negative |
| cg06126510 | 5 | 22142613  | PMCHL1    | 3 | EGFR, KRAS and pan-negative |
| cg12238343 | 5 | 33936402  | RXFP3     | 3 | EGFR, KRAS and pan-negative |
| cg07084163 | 5 | 36066783  | UGT3A2    | 3 | EGFR, KRAS and pan-negative |
| cg14654926 | 5 | 44388688  | FGF10     | 3 | EGFR, KRAS and pan-negative |
| cg06498267 | 5 | 45695922  | HCN1      | 3 | EGFR, KRAS and pan-negative |
| cg21410991 | 5 | 50678451  | ISL1      | 3 | EGFR, KRAS and pan-negative |
| cg08514736 | 5 | 54529368  | CCNO      | 3 | EGFR, KRAS and pan-negative |
| cg14277764 | 5 | 70671764  | PMCHL2    | 3 | EGFR, KRAS and pan-negative |
| cg15852891 | 5 | 76934946  | OTP       | 3 | EGFR, KRAS and pan-negative |
| cg15739437 | 5 | 110407538 | TSLP      | 3 | EGFR, KRAS and pan-negative |
| cg12880658 | 5 | 115152386 | CDO1      | 3 | EGFR, KRAS and pan-negative |
| cg15489294 | 5 | 115297853 | AQPEP     | 3 | EGFR, KRAS and pan-negative |
| cg27223047 | 5 | 127874825 | FBN2      | 3 | EGFR, KRAS and pan-negative |
| cg20103758 | 5 | 128300696 | SLC27A6   | 3 | EGFR, KRAS and pan-negative |
| cg14958635 | 5 | 134870977 | NEUROG1   | 3 | EGFR, KRAS and pan-negative |
| cg04330449 | 5 | 134871166 | NEUROG1   | 3 | EGFR, KRAS and pan-negative |
| cg11368643 | 5 | 140625059 | PCDHB15   | 3 | EGFR, KRAS and pan-negative |
| cg10757144 | 5 | 140625237 | PCDHB15   | 3 | EGFR, KRAS and pan-negative |
| cg14011639 | 5 | 140797234 | PCDHGB7   | 3 | EGFR, KRAS and pan-negative |
| cg19928046 | 5 | 149792249 | CD74      | 3 | EGFR, KRAS and pan-negative |
| cg08331313 | 5 | 151066460 | SPARC     | 3 | EGFR, KRAS and pan-negative |
| cg21233722 | 5 | 169064660 | DOCK2     | 3 | EGFR, KRAS and pan-negative |
| cg15699524 | 5 | 170845610 | FGF18     | 3 | EGFR, KRAS and pan-negative |
| cg00848461 | 5 | 176732093 | PRELID1   | 3 | EGFR, KRAS and pan-negative |
| cg01348086 | 5 | 176785296 | RGS14     | 3 | EGFR, KRAS and pan-negative |
| cg25511429 | 6 | 6008125   | NRN1      | 3 | EGFR, KRAS and pan-negative |
| cg02844545 | 6 | 10882043  | GCM2      | 3 | EGFR, KRAS and pan-negative |
| cg12457773 | 6 | 24126497  | NRSN1     | 3 | EGFR, KRAS and pan-negative |
| cg24784109 | 6 | 26200116  | HIST1H2BF | 3 | EGFR, KRAS and pan-negative |
| cg07922606 | 6 | 26225389  | HIST1H3E  | 3 | EGFR, KRAS and pan-negative |
| cg05159188 | 6 | 26240579  | HIST1H4F  | 3 | EGFR, KRAS and pan-negative |
| cg21414251 | 6 | 29364554  | OR12D2    | 3 | EGFR, KRAS and pan-negative |
| cg00679556 | 6 | 30080782  | TRIM31    | 3 | EGFR, KRAS and pan-negative |
| cg06051311 | 6 | 30131001  | TRIM15    | 3 | EGFR, KRAS and pan-negative |
| cg11484872 | 6 | 31543169  | TNF       | 3 | EGFR, KRAS and pan-negative |
| cg25391023 | 6 | 32374754  | BTNL2     | 3 | EGFR, KRAS and pan-negative |
| cg14948436 | 6 | 39290159  | KCNK16    | 3 | EGFR, KRAS and pan-negative |
| cg18159180 | 6 | 43022213  | CUL7      | 3 | EGFR, KRAS and pan-negative |
| cg25226247 | 6 | 50785152  | TFAP2B    | 3 | EGFR, KRAS and pan-negative |
| cg25593948 | 6 | 50786670  | TFAP2B    | 3 | EGFR, KRAS and pan-negative |
| cg09617773 | 6 | 76783708  | IMPG1     | 3 | EGFR, KRAS and pan-negative |
| cg06445611 | 6 | 90025053  | GABRR2    | 3 | EGFR, KRAS and pan-negative |
| cg12865837 | 6 | 100911526 | SIM1      | 3 | EGFR, KRAS and pan-negative |
| cg26252167 | 6 | 110300573 | GPR6      | 3 | EGFR, KRAS and pan-negative |
| cg26656135 | 6 | 133562774 | EYA4      | 3 | EGFR, KRAS and pan-negative |
| cg24176563 | 6 | 133562776 | EYA4      | 3 | EGFR, KRAS and pan-negative |
| cg24215443 | 6 | 134210598 | TCF21     | 3 | EGFR, KRAS and pan-negative |
| cg10784341 | 6 | 143929300 | PHACTR2   | 3 | EGFR, KRAS and pan-negative |
| cg19205041 | 6 | 143929511 | PHACTR2   | 3 | EGFR, KRAS and pan-negative |
| cg17181653 | 6 | 144417537 | SF3B5     | 3 | EGFR, KRAS and pan-negative |
| cg14262937 | 6 | 154360351 | OPRM1     | 3 | EGFR, KRAS and pan-negative |
| cg07260592 | 6 | 161100122 | 0         | 3 | EGFR, KRAS and pan-negative |
| cg20498685 | 7 | 19156086  | TWIST1    | 3 | EGFR, KRAS and pan-negative |
| cg26312150 | 7 | 19156550  | TWIST1    | 3 | EGFR, KRAS and pan-negative |
| cg09674215 | 7 | 19158134  | TWIST1    | 3 | EGFR, KRAS and pan-negative |
| cg12614105 | 7 | 24324435  | NPY       | 3 | EGFR, KRAS and pan-negative |
| cg26511321 | 7 | 27196790  | HOXA7     | 3 | EGFR, KRAS and pan-negative |
| cg25047280 | 7 | 27205479  | HOXA9     | 3 | EGFR, KRAS and pan-negative |

|            |    |           |            |   |                             |
|------------|----|-----------|------------|---|-----------------------------|
| cg15760840 | 7  | 27225222  | HOXA11-AS  | 3 | EGFR, KRAS and pan-negative |
| cg04454951 | 7  | 49813031  | VWC2       | 3 | EGFR, KRAS and pan-negative |
| cg12943082 | 7  | 75419311  | CCL26      | 3 | EGFR, KRAS and pan-negative |
| cg20537629 | 7  | 79083944  | MAGI2-AS3  | 3 | EGFR, KRAS and pan-negative |
| cg03112433 | 7  | 90338555  | CDK14      | 3 | EGFR, KRAS and pan-negative |
| cg00503840 | 7  | 96650509  | DLX5       | 3 | EGFR, KRAS and pan-negative |
| cg20080624 | 7  | 96651111  | DLX5       | 3 | EGFR, KRAS and pan-negative |
| cg13462129 | 7  | 96651281  | DLX5       | 3 | EGFR, KRAS and pan-negative |
| cg16879596 | 7  | 99277978  | CYP3A5     | 3 | EGFR, KRAS and pan-negative |
| cg18691434 | 7  | 99775425  | STAG3      | 3 | EGFR, KRAS and pan-negative |
| cg08572611 | 7  | 100253914 | ACTL6B     | 3 | EGFR, KRAS and pan-negative |
| cg17923358 | 7  | 103629618 | RELN       | 3 | EGFR, KRAS and pan-negative |
| cg24777710 | 7  | 127636733 | SND1-JT1   | 3 | EGFR, KRAS and pan-negative |
| cg21129531 | 7  | 127670703 | LRRC4      | 3 | EGFR, KRAS and pan-negative |
| cg17347253 | 7  | 130130288 | MESTT1     | 3 | EGFR, KRAS and pan-negative |
| cg18183281 | 7  | 130132505 | MEST       | 3 | EGFR, KRAS and pan-negative |
| cg15489301 | 7  | 134213038 | AKR1B10    | 3 | EGFR, KRAS and pan-negative |
| cg22920873 | 7  | 139025153 | C7orf55    | 3 | EGFR, KRAS and pan-negative |
| cg03634234 | 7  | 152132218 | KMT2C      | 3 | EGFR, KRAS and pan-negative |
| cg26738880 | 7  | 154429032 | DPP6       | 3 | EGFR, KRAS and pan-negative |
| cg00933411 | 8  | 13373090  | DLC1       | 3 | EGFR, KRAS and pan-negative |
| cg26530341 | 8  | 23083353  | LOC389641  | 3 | EGFR, KRAS and pan-negative |
| cg17963840 | 8  | 26722861  | ADRA1A     | 3 | EGFR, KRAS and pan-negative |
| cg02115041 | 8  | 53852101  | NPBWR1     | 3 | EGFR, KRAS and pan-negative |
| cg04598121 | 8  | 57358505  | PENK       | 3 | EGFR, KRAS and pan-negative |
| cg24645221 | 8  | 57358928  | PENK       | 3 | EGFR, KRAS and pan-negative |
| cg25974617 | 8  | 71520962  | LOC286190  | 3 | EGFR, KRAS and pan-negative |
| cg23710218 | 8  | 72756656  | MSC        | 3 | EGFR, KRAS and pan-negative |
| cg01248426 | 8  | 87111155  | ATP6V0D2   | 3 | EGFR, KRAS and pan-negative |
| cg05373457 | 8  | 99439948  | KCNK2      | 3 | EGFR, KRAS and pan-negative |
| cg05412531 | 8  | 125183758 | FER1L6-AS2 | 3 | EGFR, KRAS and pan-negative |
| cg08996413 | 8  | 134072427 | SLA        | 3 | EGFR, KRAS and pan-negative |
| cg23641264 | 8  | 143748641 | JRK        | 3 | EGFR, KRAS and pan-negative |
| cg12680609 | 8  | 144328500 | ZFP41      | 3 | EGFR, KRAS and pan-negative |
| cg03679581 | 9  | 5304511   | RLN2       | 3 | EGFR, KRAS and pan-negative |
| cg00055233 | 9  | 5339677   | RLN1       | 3 | EGFR, KRAS and pan-negative |
| cg12840719 | 9  | 21968233  | CDKN2A     | 3 | EGFR, KRAS and pan-negative |
| cg04995717 | 9  | 27109293  | TEK        | 3 | EGFR, KRAS and pan-negative |
| cg13246269 | 9  | 33403037  | AQP7       | 3 | EGFR, KRAS and pan-negative |
| cg04322134 | 9  | 34328884  | KIF24      | 3 | EGFR, KRAS and pan-negative |
| cg03662459 | 9  | 34654290  | IL11RA     | 3 | EGFR, KRAS and pan-negative |
| cg24194775 | 9  | 35791475  | NPR2       | 3 | EGFR, KRAS and pan-negative |
| cg12876594 | 9  | 35791798  | NPR2       | 3 | EGFR, KRAS and pan-negative |
| cg17141902 | 9  | 95897216  | NINJ1      | 3 | EGFR, KRAS and pan-negative |
| cg18521771 | 9  | 117373239 | C9orf91    | 3 | EGFR, KRAS and pan-negative |
| cg08758850 | 9  | 127533554 | NR6A1      | 3 | EGFR, KRAS and pan-negative |
| cg20789824 | 9  | 127562861 | OLFML2A    | 3 | EGFR, KRAS and pan-negative |
| cg11299964 | 9  | 128469783 | MAPKAP1    | 3 | EGFR, KRAS and pan-negative |
| cg10082841 | 9  | 130689321 | PIP5KL1    | 3 | EGFR, KRAS and pan-negative |
| cg26164184 | 9  | 137771506 | FCN2       | 3 | EGFR, KRAS and pan-negative |
| cg17357062 | 9  | 137810348 | FCN1       | 3 | EGFR, KRAS and pan-negative |
| cg25483003 | 9  | 139948856 | ENTPD2     | 3 | EGFR, KRAS and pan-negative |
| cg19404582 | 9  | 140032953 | GRIN1      | 3 | EGFR, KRAS and pan-negative |
| cg06908778 | 10 | 22634602  | SPAG6      | 3 | EGFR, KRAS and pan-negative |
| cg17389519 | 10 | 23480730  | PTF1A      | 3 | EGFR, KRAS and pan-negative |
| cg02161900 | 10 | 28035631  | MKX        | 3 | EGFR, KRAS and pan-negative |
| cg12052765 | 10 | 50816963  | CHAT       | 3 | EGFR, KRAS and pan-negative |
| cg13686115 | 10 | 60936626  | PHYHIPL    | 3 | EGFR, KRAS and pan-negative |
| cg17827767 | 10 | 86001154  | LRIT1      | 3 | EGFR, KRAS and pan-negative |
| cg06817917 | 10 | 88515527  | BMPR1A     | 3 | EGFR, KRAS and pan-negative |
| cg24949488 | 10 | 98064362  | DNTT       | 3 | EGFR, KRAS and pan-negative |
| cg15227982 | 10 | 104535854 | WBP1L      | 3 | EGFR, KRAS and pan-negative |
| cg23642747 | 10 | 105036645 | INA        | 3 | EGFR, KRAS and pan-negative |
| cg16415058 | 10 | 108923781 | SORCS1     | 3 | EGFR, KRAS and pan-negative |
| cg00263760 | 10 | 118897366 | VAX1       | 3 | EGFR, KRAS and pan-negative |
| cg26147480 | 10 | 126490099 | FAM175B    | 3 | EGFR, KRAS and pan-negative |
| cg13929328 | 10 | 129535898 | FOXI2      | 3 | EGFR, KRAS and pan-negative |
| cg19884262 | 10 | 129535968 | FOXI2      | 3 | EGFR, KRAS and pan-negative |
| cg12109455 | 10 | 134000737 | DPYSL4     | 3 | EGFR, KRAS and pan-negative |
| cg13791131 | 11 | 2161892   | IGF2-AS    | 3 | EGFR, KRAS and pan-negative |
| cg25574024 | 11 | 2161894   | IGF2-AS    | 3 | EGFR, KRAS and pan-negative |
| cg06263495 | 11 | 2292004   | ASCL2      | 3 | EGFR, KRAS and pan-negative |
| cg04457979 | 11 | 2890647   | KCNQ1DN    | 3 | EGFR, KRAS and pan-negative |
| cg19497444 | 11 | 2930794   | SLC22A18   | 3 | EGFR, KRAS and pan-negative |
| cg03336167 | 11 | 2930995   | SLC22A18   | 3 | EGFR, KRAS and pan-negative |
| cg12493906 | 11 | 5009311   | MMP26      | 3 | EGFR, KRAS and pan-negative |
| cg14544583 | 11 | 5248566   | HBB        | 3 | EGFR, KRAS and pan-negative |
| cg06353345 | 11 | 5322976   | OR51B4     | 3 | EGFR, KRAS and pan-negative |
| cg01369413 | 11 | 5530544   | UBQLN3     | 3 | EGFR, KRAS and pan-negative |
| cg01806928 | 11 | 7272804   | SYT9       | 3 | EGFR, KRAS and pan-negative |
| cg11201229 | 11 | 17191235  | PIK3C2A    | 3 | EGFR, KRAS and pan-negative |
| cg04622802 | 11 | 27015872  | FIBIN      | 3 | EGFR, KRAS and pan-negative |
| cg03506489 | 11 | 30038788  | KCNA4      | 3 | EGFR, KRAS and pan-negative |
| cg02255732 | 11 | 31150189  | 0          | 3 | EGFR, KRAS and pan-negative |
| cg15446391 | 11 | 32452370  | WT1        | 3 | EGFR, KRAS and pan-negative |
| cg22511262 | 11 | 32455192  | WT1        | 3 | EGFR, KRAS and pan-negative |
| cg18546622 | 11 | 44325029  | ALX4       | 3 | EGFR, KRAS and pan-negative |
| cg26365854 | 11 | 44330903  | ALX4       | 3 | EGFR, KRAS and pan-negative |
| cg22705929 | 11 | 57417974  | YPEL4      | 3 | EGFR, KRAS and pan-negative |
| cg25072962 | 11 | 60524575  | MS4A15     | 3 | EGFR, KRAS and pan-negative |
| cg24674703 | 11 | 60869960  | CD5        | 3 | EGFR, KRAS and pan-negative |
| cg10848367 | 11 | 62009065  | SCGB1D2    | 3 | EGFR, KRAS and pan-negative |
| cg06204948 | 11 | 63656090  | MARK2      | 3 | EGFR, KRAS and pan-negative |
| cg02586730 | 11 | 65639869  | EFEMP2     | 3 | EGFR, KRAS and pan-negative |
| cg18338293 | 11 | 66277283  | BBS1       | 3 | EGFR, KRAS and pan-negative |

|            |    |           |                   |   |                             |
|------------|----|-----------|-------------------|---|-----------------------------|
| cg18722841 | 11 | 71954982  | <i>PHOX2A</i>     | 3 | EGFR, KRAS and pan-negative |
| cg22994720 | 11 | 74441988  | <i>CHRD12</i>     | 3 | EGFR, KRAS and pan-negative |
| cg11670211 | 11 | 89224288  | <i>NOX4</i>       | 3 | EGFR, KRAS and pan-negative |
| cg00325491 | 11 | 93286170  | <i>0</i>          | 3 | EGFR, KRAS and pan-negative |
| cg22658979 | 11 | 102826469 | <i>MMP13</i>      | 3 | EGFR, KRAS and pan-negative |
| cg19343464 | 11 | 105481509 | <i>GRIA4</i>      | 3 | EGFR, KRAS and pan-negative |
| cg12758687 | 11 | 113346327 | <i>DRD2</i>       | 3 | EGFR, KRAS and pan-negative |
| cg25894551 | 11 | 117699851 | <i>FXVD2</i>      | 3 | EGFR, KRAS and pan-negative |
| cg25087423 | 11 | 118754535 | <i>CXCR5</i>      | 3 | EGFR, KRAS and pan-negative |
| cg16280667 | 11 | 118754593 | <i>CXCR5</i>      | 3 | EGFR, KRAS and pan-negative |
| cg19345602 | 11 | 125615388 | <i>PATE1</i>      | 3 | EGFR, KRAS and pan-negative |
| cg25943276 | 11 | 131533284 | <i>NTM</i>        | 3 | EGFR, KRAS and pan-negative |
| cg21902327 | 12 | 4554786   | <i>FGF6</i>       | 3 | EGFR, KRAS and pan-negative |
| cg13255190 | 12 | 4829286   | <i>GALNT8</i>     | 3 | EGFR, KRAS and pan-negative |
| cg26590537 | 12 | 5020202   | <i>KCNA1</i>      | 3 | EGFR, KRAS and pan-negative |
| cg08832227 | 12 | 5020693   | <i>KCNA1</i>      | 3 | EGFR, KRAS and pan-negative |
| cg15974062 | 12 | 6833012   | <i>COPS7A</i>     | 3 | EGFR, KRAS and pan-negative |
| cg10207745 | 12 | 13529963  | <i>C12orf36</i>   | 3 | EGFR, KRAS and pan-negative |
| cg20967028 | 12 | 14996272  | <i>ART4</i>       | 3 | EGFR, KRAS and pan-negative |
| cg27196745 | 12 | 15475319  | <i>PTPRO</i>      | 3 | EGFR, KRAS and pan-negative |
| cg00495491 | 12 | 26822813  | <i>ITPR2</i>      | 3 | EGFR, KRAS and pan-negative |
| cg22941086 | 12 | 40019883  | <i>C12orf40</i>   | 3 | EGFR, KRAS and pan-negative |
| cg15701111 | 12 | 52685334  | <i>KRT81</i>      | 3 | EGFR, KRAS and pan-negative |
| cg20050826 | 12 | 52995295  | <i>KRT72</i>      | 3 | EGFR, KRAS and pan-negative |
| cg03928182 | 12 | 71314662  | <i>PTPRR</i>      | 3 | EGFR, KRAS and pan-negative |
| cg24719984 | 12 | 82153464  | <i>PPFIA2</i>     | 3 | EGFR, KRAS and pan-negative |
| cg10141715 | 12 | 101603453 | <i>SLC5A8</i>     | 3 | EGFR, KRAS and pan-negative |
| cg02351381 | 12 | 110172346 | <i>FAM222A</i>    | 3 | EGFR, KRAS and pan-negative |
| cg26789453 | 12 | 112452424 | <i>ERP29</i>      | 3 | EGFR, KRAS and pan-negative |
| cg21907579 | 12 | 114845868 | <i>TBX5-AS1</i>   | 3 | EGFR, KRAS and pan-negative |
| cg23054883 | 12 | 130647580 | <i>FZD10</i>      | 3 | EGFR, KRAS and pan-negative |
| cg16422907 | 13 | 37006734  | <i>CCNA1</i>      | 3 | EGFR, KRAS and pan-negative |
| cg12571423 | 13 | 37006748  | <i>CCNA1</i>      | 3 | EGFR, KRAS and pan-negative |
| cg17906786 | 13 | 37247708  | <i>SERTM1</i>     | 3 | EGFR, KRAS and pan-negative |
| cg27065979 | 13 | 52734134  | <i>NEK3</i>       | 3 | EGFR, KRAS and pan-negative |
| cg22398616 | 13 | 53314203  | <i>LECT1</i>      | 3 | EGFR, KRAS and pan-negative |
| cg23316360 | 13 | 78492916  | <i>EDNRB</i>      | 3 | EGFR, KRAS and pan-negative |
| cg02932669 | 13 | 102068258 | <i>NALCN</i>      | 3 | EGFR, KRAS and pan-negative |
| cg06675478 | 13 | 112721786 | <i>SOX1</i>       | 3 | EGFR, KRAS and pan-negative |
| cg07218880 | 13 | 115046279 | <i>UPF3A</i>      | 3 | EGFR, KRAS and pan-negative |
| cg18081258 | 14 | 21494161  | <i>NDRG2</i>      | 3 | EGFR, KRAS and pan-negative |
| cg24355048 | 14 | 25045028  | <i>CTSG</i>       | 3 | EGFR, KRAS and pan-negative |
| cg10300684 | 14 | 29236323  | <i>FOXG1</i>      | 3 | EGFR, KRAS and pan-negative |
| cg15607672 | 14 | 57277227  | <i>OTX2</i>       | 3 | EGFR, KRAS and pan-negative |
| cg27120999 | 14 | 65008050  | <i>HSPA2</i>      | 3 | EGFR, KRAS and pan-negative |
| cg26780333 | 14 | 74058972  | <i>ACOT4</i>      | 3 | EGFR, KRAS and pan-negative |
| cg11525285 | 14 | 74706336  | <i>VSX2</i>       | 3 | EGFR, KRAS and pan-negative |
| cg08675585 | 14 | 77292733  | <i>C14orf166B</i> | 3 | EGFR, KRAS and pan-negative |
| cg04514469 | 14 | 95942666  | <i>SYNE3</i>      | 3 | EGFR, KRAS and pan-negative |
| cg08278554 | 15 | 45722919  | <i>C15orf48</i>   | 3 | EGFR, KRAS and pan-negative |
| cg27584171 | 15 | 49338887  | <i>SECISBP2L</i>  | 3 | EGFR, KRAS and pan-negative |
| cg05964373 | 15 | 56657478  | <i>TEX9</i>       | 3 | EGFR, KRAS and pan-negative |
| cg06993413 | 15 | 65810204  | <i>DPP8</i>       | 3 | EGFR, KRAS and pan-negative |
| cg21164303 | 15 | 79603277  | <i>TMED3</i>      | 3 | EGFR, KRAS and pan-negative |
| cg02196730 | 15 | 80188777  | <i>MTHFS</i>      | 3 | EGFR, KRAS and pan-negative |
| cg23855392 | 15 | 80189782  | <i>MTHFS</i>      | 3 | EGFR, KRAS and pan-negative |
| cg17051321 | 15 | 83952508  | <i>BNC1</i>       | 3 | EGFR, KRAS and pan-negative |
| cg14384532 | 15 | 88800624  | <i>NTRK3</i>      | 3 | EGFR, KRAS and pan-negative |
| cg02423618 | 15 | 97325725  | <i>SPATA8-AS1</i> | 3 | EGFR, KRAS and pan-negative |
| cg20249919 | 15 | 102029706 | <i>PCSK6</i>      | 3 | EGFR, KRAS and pan-negative |
| cg05135288 | 16 | 717707    | <i>RHOT2</i>      | 3 | EGFR, KRAS and pan-negative |
| cg17199483 | 16 | 16042767  | <i>ABCC1</i>      | 3 | EGFR, KRAS and pan-negative |
| cg05436658 | 16 | 23847568  | <i>PRKCB</i>      | 3 | EGFR, KRAS and pan-negative |
| cg03297731 | 16 | 30124293  | <i>GDPD3</i>      | 3 | EGFR, KRAS and pan-negative |
| cg13897627 | 16 | 49378497  | <i>0</i>          | 3 | EGFR, KRAS and pan-negative |
| cg04490714 | 16 | 55690564  | <i>SLC6A2</i>     | 3 | EGFR, KRAS and pan-negative |
| cg07039362 | 16 | 55908870  | <i>CES5A</i>      | 3 | EGFR, KRAS and pan-negative |
| cg23092086 | 16 | 55909573  | <i>CES5A</i>      | 3 | EGFR, KRAS and pan-negative |
| cg12564453 | 16 | 56995840  | <i>CETP</i>       | 3 | EGFR, KRAS and pan-negative |
| cg11323198 | 16 | 62069806  | <i>CDH8</i>       | 3 | EGFR, KRAS and pan-negative |
| cg01683883 | 16 | 66613053  | <i>CMTM2</i>      | 3 | EGFR, KRAS and pan-negative |
| cg10432620 | 16 | 74808963  | <i>FA2H</i>       | 3 | EGFR, KRAS and pan-negative |
| cg06793062 | 16 | 76343868  | <i>CNTNAP4</i>    | 3 | EGFR, KRAS and pan-negative |
| cg02168291 | 16 | 82671520  | <i>CDH13</i>      | 3 | EGFR, KRAS and pan-negative |
| cg21066636 | 17 | 4675292   | <i>TM4SF5</i>     | 3 | EGFR, KRAS and pan-negative |
| cg22628926 | 17 | 4844700   | <i>RNF167</i>     | 3 | EGFR, KRAS and pan-negative |
| cg07480567 | 17 | 13505174  | <i>HS3ST3A1</i>   | 3 | EGFR, KRAS and pan-negative |
| cg09606564 | 17 | 19290353  | <i>MFAP4</i>      | 3 | EGFR, KRAS and pan-negative |
| cg27000831 | 17 | 32645748  | <i>CCL8</i>       | 3 | EGFR, KRAS and pan-negative |
| cg16826286 | 17 | 34266290  | <i>LYZL6</i>      | 3 | EGFR, KRAS and pan-negative |
| cg25659818 | 17 | 34431747  | <i>CCL4</i>       | 3 | EGFR, KRAS and pan-negative |
| cg04901273 | 17 | 34503359  | <i>TBC1D3B</i>    | 3 | EGFR, KRAS and pan-negative |
| cg23350580 | 17 | 34592075  | <i>TBC1D3C</i>    | 3 | EGFR, KRAS and pan-negative |
| cg15005385 | 17 | 34626054  | <i>CCL3L1</i>     | 3 | EGFR, KRAS and pan-negative |
| cg15129294 | 17 | 34639274  | <i>CCL4L2</i>     | 3 | EGFR, KRAS and pan-negative |
| cg01680823 | 17 | 37822045  | <i>TCAP</i>       | 3 | EGFR, KRAS and pan-negative |
| cg21546671 | 17 | 46655387  | <i>HOXB4</i>      | 3 | EGFR, KRAS and pan-negative |
| cg15539420 | 17 | 46692248  | <i>HOXB8</i>      | 3 | EGFR, KRAS and pan-negative |
| cg03866607 | 17 | 59532826  | <i>TBX4</i>       | 3 | EGFR, KRAS and pan-negative |
| cg16008138 | 17 | 60885892  | <i>42439</i>      | 3 | EGFR, KRAS and pan-negative |
| cg18345635 | 17 | 80186080  | <i>SLC16A3</i>    | 3 | EGFR, KRAS and pan-negative |
| cg19461621 | 18 | 500979    | <i>COLEC12</i>    | 3 | EGFR, KRAS and pan-negative |
| cg11214889 | 18 | 597111    | <i>CLUL1</i>      | 3 | EGFR, KRAS and pan-negative |
| cg07307078 | 18 | 12307630  | <i>TUBB6</i>      | 3 | EGFR, KRAS and pan-negative |
| cg02624705 | 18 | 49868678  | <i>DCC</i>        | 3 | EGFR, KRAS and pan-negative |

|            |    |           |            |   |                             |
|------------|----|-----------|------------|---|-----------------------------|
| cg08411049 | 18 | 61144250  | SERPINB5   | 3 | EGFR, KRAS and pan-negative |
| cg15422147 | 18 | 61144339  | SERPINB5   | 3 | EGFR, KRAS and pan-negative |
| cg26186727 | 18 | 70534534  | NETO1      | 3 | EGFR, KRAS and pan-negative |
| cg15059932 | 18 | 74535233  | ZNF236     | 3 | EGFR, KRAS and pan-negative |
| cg15343119 | 18 | 74961785  | GALR1      | 3 | EGFR, KRAS and pan-negative |
| cg12334759 | 19 | 475154    | ODF3L2     | 3 | EGFR, KRAS and pan-negative |
| cg19463518 | 19 | 634035    | POLRMT     | 3 | EGFR, KRAS and pan-negative |
| cg13266292 | 19 | 1438084   | RPS15      | 3 | EGFR, KRAS and pan-negative |
| cg16592658 | 19 | 4229887   | EBI3       | 3 | EGFR, KRAS and pan-negative |
| cg04062391 | 19 | 9609204   | ZNF560     | 3 | EGFR, KRAS and pan-negative |
| cg23018448 | 19 | 10811855  | QTRT1      | 3 | EGFR, KRAS and pan-negative |
| cg05718253 | 19 | 11347359  | DOCK6      | 3 | EGFR, KRAS and pan-negative |
| cg19103609 | 19 | 14543524  | PKN1       | 3 | EGFR, KRAS and pan-negative |
| cg15746620 | 19 | 14785849  | EMR3       | 3 | EGFR, KRAS and pan-negative |
| cg27067618 | 19 | 15751949  | CYP4F3     | 3 | EGFR, KRAS and pan-negative |
| cg14449575 | 19 | 19373743  | HAPLN4     | 3 | EGFR, KRAS and pan-negative |
| cg15046693 | 19 | 33863876  | CEBPG      | 3 | EGFR, KRAS and pan-negative |
| cg26026726 | 19 | 35862414  | 0          | 3 | EGFR, KRAS and pan-negative |
| cg06123346 | 19 | 36054519  | ATP4A      | 3 | EGFR, KRAS and pan-negative |
| cg24335895 | 19 | 36643771  | COX7A1     | 3 | EGFR, KRAS and pan-negative |
| cg02358804 | 19 | 36719212  | ZNF146     | 3 | EGFR, KRAS and pan-negative |
| cg27389185 | 19 | 38042123  | ZNF571-AS1 | 3 | EGFR, KRAS and pan-negative |
| cg15664905 | 19 | 44009429  | PHLDB3     | 3 | EGFR, KRAS and pan-negative |
| cg06540636 | 19 | 44174071  | PLAUR      | 3 | EGFR, KRAS and pan-negative |
| cg12768605 | 19 | 44324951  | LYPD5      | 3 | EGFR, KRAS and pan-negative |
| cg22341310 | 19 | 48048583  | ZNF541     | 3 | EGFR, KRAS and pan-negative |
| cg18534730 | 19 | 48547448  | CABP5      | 3 | EGFR, KRAS and pan-negative |
| cg18967533 | 19 | 51472725  | KLK6       | 3 | EGFR, KRAS and pan-negative |
| cg21930712 | 19 | 51761116  | SIGLECL1   | 3 | EGFR, KRAS and pan-negative |
| cg16731240 | 19 | 52391250  | ZNF577     | 3 | EGFR, KRAS and pan-negative |
| cg22472290 | 19 | 52391480  | ZNF577     | 3 | EGFR, KRAS and pan-negative |
| cg15062535 | 19 | 52847933  | ZNF610     | 3 | EGFR, KRAS and pan-negative |
| cg18335068 | 19 | 53757910  | ZNF677     | 3 | EGFR, KRAS and pan-negative |
| cg06392096 | 19 | 54824275  | LILRA5     | 3 | EGFR, KRAS and pan-negative |
| cg20542190 | 19 | 54850619  | LILRA4     | 3 | EGFR, KRAS and pan-negative |
| cg11261264 | 19 | 55720737  | PTPRH      | 3 | EGFR, KRAS and pan-negative |
| cg26309134 | 19 | 56879571  | ZNF542     | 3 | EGFR, KRAS and pan-negative |
| cg09837943 | 19 | 57306631  | ZIM2       | 3 | EGFR, KRAS and pan-negative |
| cg02793099 | 19 | 57350004  | PEG3       | 3 | EGFR, KRAS and pan-negative |
| cg02162069 | 19 | 57352134  | ZIM2       | 3 | EGFR, KRAS and pan-negative |
| cg21790626 | 19 | 58220494  | ZNF154     | 3 | EGFR, KRAS and pan-negative |
| cg08668790 | 19 | 58220662  | ZNF154     | 3 | EGFR, KRAS and pan-negative |
| cg22449114 | 20 | 590243    | TCF15      | 3 | EGFR, KRAS and pan-negative |
| cg20289911 | 20 | 816362    | FAM110A    | 3 | EGFR, KRAS and pan-negative |
| cg11004890 | 20 | 3218500   | SLC4A11    | 3 | EGFR, KRAS and pan-negative |
| cg11804789 | 20 | 24929716  | CST7       | 3 | EGFR, KRAS and pan-negative |
| cg20312687 | 20 | 29956585  | DEFB118    | 3 | EGFR, KRAS and pan-negative |
| cg12552392 | 20 | 34288511  | NFS1       | 3 | EGFR, KRAS and pan-negative |
| cg08254089 | 20 | 36933189  | BPI        | 3 | EGFR, KRAS and pan-negative |
| cg03567830 | 20 | 61339871  | NTSR1      | 3 | EGFR, KRAS and pan-negative |
| cg02920216 | 21 | 19616939  | CHODL      | 3 | EGFR, KRAS and pan-negative |
| cg24130010 | 21 | 19617176  | CHODL      | 3 | EGFR, KRAS and pan-negative |
| cg18822544 | 21 | 31692465  | KRTAP26-1  | 3 | EGFR, KRAS and pan-negative |
| cg02493771 | 21 | 31744328  | KRTAP13-2  | 3 | EGFR, KRAS and pan-negative |
| cg02764897 | 21 | 31768311  | KRTAP13-1  | 3 | EGFR, KRAS and pan-negative |
| cg16431978 | 21 | 31797932  | KRTAP13-3  | 3 | EGFR, KRAS and pan-negative |
| cg15606663 | 21 | 31812603  | KRTAP15-1  | 3 | EGFR, KRAS and pan-negative |
| cg16812893 | 21 | 31813075  | KRTAP15-1  | 3 | EGFR, KRAS and pan-negative |
| cg25388528 | 21 | 31987978  | KRTAP20-1  | 3 | EGFR, KRAS and pan-negative |
| cg00948500 | 21 | 32006706  | KRTAP20-2  | 3 | EGFR, KRAS and pan-negative |
| cg24423088 | 21 | 32185365  | KRTAP8-1   | 3 | EGFR, KRAS and pan-negative |
| cg07014174 | 21 | 32253760  | KRTAP11-1  | 3 | EGFR, KRAS and pan-negative |
| cg04915566 | 21 | 36421472  | RUNX1      | 3 | EGFR, KRAS and pan-negative |
| cg19836199 | 21 | 36421941  | RUNX1      | 3 | EGFR, KRAS and pan-negative |
| cg18729973 | 21 | 43785785  | TFF1       | 3 | EGFR, KRAS and pan-negative |
| cg14785479 | 22 | 20792535  | SCARF2     | 3 | EGFR, KRAS and pan-negative |
| cg15448245 | 22 | 24641654  | GGT5       | 3 | EGFR, KRAS and pan-negative |
| cg16612562 | 22 | 29712045  | RASL10A    | 3 | EGFR, KRAS and pan-negative |
| cg20904010 | 22 | 33402393  | SYN3       | 3 | EGFR, KRAS and pan-negative |
| cg13351406 | 22 | 36031241  | 0          | 3 | EGFR, KRAS and pan-negative |
| cg04958389 | 0  | 0         | 0          | 3 | EGFR, KRAS and pan-negative |
| cg13944141 | 0  | 0         | 0          | 3 | EGFR, KRAS and pan-negative |
| cg20664247 | 1  | 2345475   | PEX10      | 3 | EGFR, ROS1 and pan-negative |
| cg14506552 | 1  | 11918954  | NPPB       | 3 | EGFR, ROS1 and pan-negative |
| cg20404387 | 1  | 20879296  | FAM43B     | 3 | EGFR, ROS1 and pan-negative |
| cg19228118 | 1  | 34631324  | CSMD2      | 3 | EGFR, ROS1 and pan-negative |
| cg10705800 | 1  | 41328420  | CITED4     | 3 | EGFR, ROS1 and pan-negative |
| cg20876010 | 1  | 64971752  | CACHD1     | 3 | EGFR, ROS1 and pan-negative |
| cg00519208 | 1  | 93258319  | EVI5       | 3 | EGFR, ROS1 and pan-negative |
| cg16773028 | 1  | 111148339 | KCNA2      | 3 | EGFR, ROS1 and pan-negative |
| cg14826683 | 1  | 153013830 | SPRR2D     | 3 | EGFR, ROS1 and pan-negative |
| cg13997435 | 1  | 153538406 | S100A2     | 3 | EGFR, ROS1 and pan-negative |
| cg11721194 | 1  | 160709239 | SLAMF7     | 3 | EGFR, ROS1 and pan-negative |
| cg09060914 | 1  | 169599558 | SELP       | 3 | EGFR, ROS1 and pan-negative |
| cg15514848 | 1  | 171217555 | FMO1       | 3 | EGFR, ROS1 and pan-negative |
| cg04983977 | 1  | 200842145 | GPR25      | 3 | EGFR, ROS1 and pan-negative |
| cg13645078 | 1  | 201438647 | PHLDA3     | 3 | EGFR, ROS1 and pan-negative |
| cg11455040 | 1  | 205649941 | SLC45A3    | 3 | EGFR, ROS1 and pan-negative |
| cg20530056 | 1  | 206643377 | IKBKE      | 3 | EGFR, ROS1 and pan-negative |
| cg22462235 | 1  | 226129481 | LEFTY2     | 3 | EGFR, ROS1 and pan-negative |
| cg22844623 | 1  | 228336130 | GJC2       | 3 | EGFR, ROS1 and pan-negative |
| cg22879289 | 1  | 236237743 | 0          | 3 | EGFR, ROS1 and pan-negative |
| cg20234959 | 1  | 236237760 | 0          | 3 | EGFR, ROS1 and pan-negative |
| cg03082060 | 1  | 236680224 | LGALS8     | 3 | EGFR, ROS1 and pan-negative |
| cg04434339 | 2  | 107503547 | ST6GAL2    | 3 | EGFR, ROS1 and pan-negative |

|            |    |           |                   |   |                             |
|------------|----|-----------|-------------------|---|-----------------------------|
| cg17966192 | 2  | 108994116 | <i>SULT1C4</i>    | 3 | EGFR, ROS1 and pan-negative |
| cg03266453 | 2  | 119606055 | <i>EN1</i>        | 3 | EGFR, ROS1 and pan-negative |
| cg02812142 | 2  | 135595323 | <i>ACMSD</i>      | 3 | EGFR, ROS1 and pan-negative |
| cg10107725 | 2  | 160761556 | <i>LY75-CD302</i> | 3 | EGFR, ROS1 and pan-negative |
| cg14991487 | 2  | 176987404 | <i>HOXD9</i>      | 3 | EGFR, ROS1 and pan-negative |
| cg05130485 | 2  | 202098257 | <i>CASP8</i>      | 3 | EGFR, ROS1 and pan-negative |
| cg25057743 | 2  | 209271505 | <i>PTH2R</i>      | 3 | EGFR, ROS1 and pan-negative |
| cg10140638 | 2  | 220174207 | <i>PTPRN</i>      | 3 | EGFR, ROS1 and pan-negative |
| cg00539322 | 2  | 234216360 | <i>SAG</i>        | 3 | EGFR, ROS1 and pan-negative |
| cg08548888 | 3  | 38180840  | <i>MYD88</i>      | 3 | EGFR, ROS1 and pan-negative |
| cg01885635 | 3  | 40566085  | <i>ZNF621</i>     | 3 | EGFR, ROS1 and pan-negative |
| cg03724463 | 3  | 42306524  | <i>CCK</i>        | 3 | EGFR, ROS1 and pan-negative |
| cg16842214 | 3  | 42727160  | <i>KLHL40</i>     | 3 | EGFR, ROS1 and pan-negative |
| cg26614073 | 3  | 47517819  | <i>SCAP</i>       | 3 | EGFR, ROS1 and pan-negative |
| cg12554573 | 3  | 51976667  | <i>PARP3</i>      | 3 | EGFR, ROS1 and pan-negative |
| cg07369274 | 3  | 58200599  | <i>0</i>          | 3 | EGFR, ROS1 and pan-negative |
| cg15113803 | 3  | 129247119 | <i>RHO</i>        | 3 | EGFR, ROS1 and pan-negative |
| cg04121771 | 3  | 149191624 | <i>TM4SF4</i>     | 3 | EGFR, ROS1 and pan-negative |
| cg09432154 | 3  | 151034669 | <i>GPR87</i>      | 3 | EGFR, ROS1 and pan-negative |
| cg07027075 | 4  | 39461721  | <i>LIAS</i>       | 3 | EGFR, ROS1 and pan-negative |
| cg19399100 | 4  | 70519695  | <i>UGT2A1</i>     | 3 | EGFR, ROS1 and pan-negative |
| cg06059810 | 4  | 71587722  | <i>RUFY3</i>      | 3 | EGFR, ROS1 and pan-negative |
| cg06690548 | 4  | 139162808 | <i>SLC7A11</i>    | 3 | EGFR, ROS1 and pan-negative |
| cg01601573 | 4  | 144256835 | <i>GAB1</i>       | 3 | EGFR, ROS1 and pan-negative |
| cg26218269 | 4  | 151503227 | <i>MAB21L2</i>    | 3 | EGFR, ROS1 and pan-negative |
| cg03616357 | 4  | 156297942 | <i>MAP9</i>       | 3 | EGFR, ROS1 and pan-negative |
| cg01324261 | 4  | 174320378 | <i>SCRG1</i>      | 3 | EGFR, ROS1 and pan-negative |
| cg15037004 | 5  | 71803938  | <i>ZNF366</i>     | 3 | EGFR, ROS1 and pan-negative |
| cg09952204 | 5  | 80256664  | <i>RASGRF2</i>    | 3 | EGFR, ROS1 and pan-negative |
| cg23941599 | 5  | 114880796 | <i>FEM1C</i>      | 3 | EGFR, ROS1 and pan-negative |
| cg18482268 | 5  | 145718965 | <i>POU4F3</i>     | 3 | EGFR, ROS1 and pan-negative |
| cg04424621 | 6  | 27101941  | <i>HIST1H2BJ</i>  | 3 | EGFR, ROS1 and pan-negative |
| cg03099771 | 6  | 27215365  | <i>PRSS16</i>     | 3 | EGFR, ROS1 and pan-negative |
| cg15679095 | 6  | 42789053  | <i>GLTSCR1L</i>   | 3 | EGFR, ROS1 and pan-negative |
| cg00229387 | 6  | 43445942  | <i>TJAP1</i>      | 3 | EGFR, ROS1 and pan-negative |
| cg01946401 | 6  | 45296101  | <i>RUNX2</i>      | 3 | EGFR, ROS1 and pan-negative |
| cg22884082 | 6  | 88039023  | <i>GBJ7</i>       | 3 | EGFR, ROS1 and pan-negative |
| cg13603171 | 6  | 132723164 | <i>MOXD1</i>      | 3 | EGFR, ROS1 and pan-negative |
| cg15749858 | 7  | 20256996  | <i>MACC1</i>      | 3 | EGFR, ROS1 and pan-negative |
| cg10883303 | 7  | 27239024  | <i>HOXA13</i>     | 3 | EGFR, ROS1 and pan-negative |
| cg18884741 | 7  | 66204797  | <i>RABGEF1</i>    | 3 | EGFR, ROS1 and pan-negative |
| cg07033083 | 7  | 72424763  | <i>NSUN5P2</i>    | 3 | EGFR, ROS1 and pan-negative |
| cg06745740 | 7  | 81399587  | <i>HGF</i>        | 3 | EGFR, ROS1 and pan-negative |
| cg00096922 | 7  | 96654185  | <i>DLX5</i>       | 3 | EGFR, ROS1 and pan-negative |
| cg01274660 | 7  | 100465625 | <i>TRIP6</i>      | 3 | EGFR, ROS1 and pan-negative |
| cg22828602 | 7  | 122338579 | <i>RNF133</i>     | 3 | EGFR, ROS1 and pan-negative |
| cg09872616 | 7  | 130126182 | <i>MEST</i>       | 3 | EGFR, ROS1 and pan-negative |
| cg01888566 | 7  | 130126513 | <i>MEST</i>       | 3 | EGFR, ROS1 and pan-negative |
| cg15164103 | 7  | 130126871 | <i>MEST</i>       | 3 | EGFR, ROS1 and pan-negative |
| cg04810997 | 7  | 143140674 | <i>TAS2R60</i>    | 3 | EGFR, ROS1 and pan-negative |
| cg10709021 | 8  | 30890108  | <i>PURG</i>       | 3 | EGFR, ROS1 and pan-negative |
| cg22418909 | 8  | 41166738  | <i>SFRP1</i>      | 3 | EGFR, ROS1 and pan-negative |
| cg23732024 | 8  | 74903801  | <i>LY96</i>       | 3 | EGFR, ROS1 and pan-negative |
| cg03561565 | 8  | 99438624  | <i>KCNS2</i>      | 3 | EGFR, ROS1 and pan-negative |
| cg01484156 | 8  | 102802615 | <i>NCALD</i>      | 3 | EGFR, ROS1 and pan-negative |
| cg13302823 | 8  | 145559792 | <i>SCRT1</i>      | 3 | EGFR, ROS1 and pan-negative |
| cg15840658 | 9  | 72287152  | <i>APBA1</i>      | 3 | EGFR, ROS1 and pan-negative |
| cg13351583 | 9  | 91793648  | <i>SHC3</i>       | 3 | EGFR, ROS1 and pan-negative |
| cg23114594 | 10 | 13544648  | <i>BEND7</i>      | 3 | EGFR, ROS1 and pan-negative |
| cg11438428 | 10 | 23481594  | <i>PTF1A</i>      | 3 | EGFR, ROS1 and pan-negative |
| cg08427977 | 10 | 50323832  | <i>VSTM4</i>      | 3 | EGFR, ROS1 and pan-negative |
| cg18901940 | 10 | 69869364  | <i>MYPN</i>       | 3 | EGFR, ROS1 and pan-negative |
| cg04268405 | 10 | 73723221  | <i>CHST3</i>      | 3 | EGFR, ROS1 and pan-negative |
| cg15302379 | 10 | 102821848 | <i>KAZALD1</i>    | 3 | EGFR, ROS1 and pan-negative |
| cg03755123 | 10 | 135043508 | <i>UTF1</i>       | 3 | EGFR, ROS1 and pan-negative |
| cg15856055 | 10 | 135121295 | <i>ZNF511</i>     | 3 | EGFR, ROS1 and pan-negative |
| cg24528523 | 11 | 2923808   | <i>SLC22A18</i>   | 3 | EGFR, ROS1 and pan-negative |
| cg07271264 | 11 | 17740977  | <i>MYOD1</i>      | 3 | EGFR, ROS1 and pan-negative |
| cg25363445 | 11 | 44326516  | <i>ALX4</i>       | 3 | EGFR, ROS1 and pan-negative |
| cg05244766 | 11 | 67350499  | <i>GSTP1</i>      | 3 | EGFR, ROS1 and pan-negative |
| cg02254407 | 11 | 73357159  | <i>PLEKHB1</i>    | 3 | EGFR, ROS1 and pan-negative |
| cg19324627 | 11 | 116708329 | <i>APOA1</i>      | 3 | EGFR, ROS1 and pan-negative |
| cg03490200 | 12 | 8975196   | <i>A2ML1</i>      | 3 | EGFR, ROS1 and pan-negative |
| cg04123507 | 12 | 52695270  | <i>KRT86</i>      | 3 | EGFR, ROS1 and pan-negative |
| cg03815350 | 12 | 53663042  | <i>ESPL1</i>      | 3 | EGFR, ROS1 and pan-negative |
| cg26153631 | 12 | 54379056  | <i>HOXC10</i>     | 3 | EGFR, ROS1 and pan-negative |
| cg22876908 | 12 | 56325149  | <i>DGKA</i>       | 3 | EGFR, ROS1 and pan-negative |
| cg15381313 | 12 | 100867509 | <i>NR1H4</i>      | 3 | EGFR, ROS1 and pan-negative |
| cg10281002 | 12 | 114846399 | <i>TBX5</i>       | 3 | EGFR, ROS1 and pan-negative |
| cg03311899 | 12 | 123187857 | <i>HCAR2</i>      | 3 | EGFR, ROS1 and pan-negative |
| cg22534509 | 12 | 123215119 | <i>HCAR1</i>      | 3 | EGFR, ROS1 and pan-negative |
| cg03667047 | 13 | 33589962  | <i>KL</i>         | 3 | EGFR, ROS1 and pan-negative |
| cg01668383 | 13 | 37679573  | <i>CSNK1A1L</i>   | 3 | EGFR, ROS1 and pan-negative |
| cg10484958 | 13 | 53424127  | <i>PCDH8</i>      | 3 | EGFR, ROS1 and pan-negative |
| cg03386869 | 13 | 102104848 | <i>ITGBL1</i>     | 3 | EGFR, ROS1 and pan-negative |
| cg26191951 | 14 | 21423466  | <i>RNASE2</i>     | 3 | EGFR, ROS1 and pan-negative |
| cg10318258 | 14 | 24809759  | <i>RIPK3</i>      | 3 | EGFR, ROS1 and pan-negative |
| cg18403361 | 14 | 38725750  | <i>CLEC14A</i>    | 3 | EGFR, ROS1 and pan-negative |
| cg24058132 | 14 | 88459866  | <i>GALC</i>       | 3 | EGFR, ROS1 and pan-negative |
| cg04411625 | 14 | 105953462 | <i>CRIP1</i>      | 3 | EGFR, ROS1 and pan-negative |
| cg02000005 | 14 | 105953642 | <i>CRIP1</i>      | 3 | EGFR, ROS1 and pan-negative |
| cg27496506 | 15 | 43559170  | <i>TGM5</i>       | 3 | EGFR, ROS1 and pan-negative |
| cg26929536 | 15 | 51973460  | <i>SCG3</i>       | 3 | EGFR, ROS1 and pan-negative |
| cg06817269 | 15 | 59909035  | <i>GCNT3</i>      | 3 | EGFR, ROS1 and pan-negative |
| cg20468883 | 15 | 59982396  | <i>BNIP2</i>      | 3 | EGFR, ROS1 and pan-negative |

|            |    |           |             |   |                             |
|------------|----|-----------|-------------|---|-----------------------------|
| cg13301933 | 15 | 61521439  | RORA        | 3 | EGFR, ROS1 and pan-negative |
| cg24447890 | 15 | 75105144  | LMAN1L      | 3 | EGFR, ROS1 and pan-negative |
| cg07639720 | 15 | 83952875  | BNC1        | 3 | EGFR, ROS1 and pan-negative |
| cg03312532 | 15 | 90166033  | TICRR       | 3 | EGFR, ROS1 and pan-negative |
| cg19030554 | 16 | 1822289   | NME3        | 3 | EGFR, ROS1 and pan-negative |
| cg02331561 | 16 | 2391081   | ABCA17P     | 3 | EGFR, ROS1 and pan-negative |
| cg21275690 | 16 | 3072970   | THOC6       | 3 | EGFR, ROS1 and pan-negative |
| cg24652919 | 16 | 3073191   | THOC6       | 3 | EGFR, ROS1 and pan-negative |
| cg10784813 | 16 | 11348678  | SOC51       | 3 | EGFR, ROS1 and pan-negative |
| cg08747377 | 16 | 82660670  | CDH13       | 3 | EGFR, ROS1 and pan-negative |
| cg27429194 | 17 | 3099847   | OR1A2       | 3 | EGFR, ROS1 and pan-negative |
| cg23671708 | 17 | 7758291   | TMEM88      | 3 | EGFR, ROS1 and pan-negative |
| cg26771272 | 17 | 18163183  | SMCR7       | 3 | EGFR, ROS1 and pan-negative |
| cg27478659 | 17 | 39769012  | KRT16       | 3 | EGFR, ROS1 and pan-negative |
| cg22373112 | 17 | 40307717  | RAB5C       | 3 | EGFR, ROS1 and pan-negative |
| cg25145670 | 17 | 46655164  | HOXB4       | 3 | EGFR, ROS1 and pan-negative |
| cg14458834 | 17 | 46655394  | HOXB4       | 3 | EGFR, ROS1 and pan-negative |
| cg22061523 | 17 | 76183551  | AFMID       | 3 | EGFR, ROS1 and pan-negative |
| cg16112050 | 18 | 713200    | ENOSF1      | 3 | EGFR, ROS1 and pan-negative |
| cg07846220 | 18 | 7117680   | LAMA1       | 3 | EGFR, ROS1 and pan-negative |
| cg26727372 | 18 | 48404491  | ME2         | 3 | EGFR, ROS1 and pan-negative |
| cg22549408 | 18 | 57566300  | PMAIP1      | 3 | EGFR, ROS1 and pan-negative |
| cg18493147 | 19 | 474445    | ODF3L2      | 3 | EGFR, ROS1 and pan-negative |
| cg09936839 | 19 | 4181854   | SIRT6       | 3 | EGFR, ROS1 and pan-negative |
| cg21665774 | 19 | 34790692  | KIAA0355    | 3 | EGFR, ROS1 and pan-negative |
| cg08539991 | 19 | 36203832  | ZBTB32      | 3 | EGFR, ROS1 and pan-negative |
| cg17982671 | 19 | 39735568  | IFNL3       | 3 | EGFR, ROS1 and pan-negative |
| cg23147597 | 19 | 45174681  | CEACAM19    | 3 | EGFR, ROS1 and pan-negative |
| cg20313722 | 19 | 47248003  | FKRP        | 3 | EGFR, ROS1 and pan-negative |
| cg19025034 | 19 | 49198900  | FUT2        | 3 | EGFR, ROS1 and pan-negative |
| cg09577651 | 20 | 1600705   | SIRPB1      | 3 | EGFR, ROS1 and pan-negative |
| cg10019507 | 20 | 23016315  | SSTR4       | 3 | EGFR, ROS1 and pan-negative |
| cg16098981 | 20 | 24449865  | SYNDIG1     | 3 | EGFR, ROS1 and pan-negative |
| cg01355739 | 20 | 57416888  | GNAS        | 3 | EGFR, ROS1 and pan-negative |
| cg04048259 | 20 | 57875346  | EDN3        | 3 | EGFR, ROS1 and pan-negative |
| cg21484834 | 20 | 62168579  | PTK6        | 3 | EGFR, ROS1 and pan-negative |
| cg08190291 | 21 | 28339442  | ADAMTS5     | 3 | EGFR, ROS1 and pan-negative |
| cg25468723 | 22 | 26566058  | SEZ6L       | 3 | EGFR, ROS1 and pan-negative |
| cg14072120 | 22 | 37640402  | RAC2        | 3 | EGFR, ROS1 and pan-negative |
| cg07536847 | 1  | 18957232  | PAX7        | 3 | EGFR, HER2 and pan-negative |
| cg01868128 | 1  | 152483675 | LCE5A       | 3 | EGFR, HER2 and pan-negative |
| cg14225485 | 2  | 14772568  | FAM84A      | 3 | EGFR, HER2 and pan-negative |
| cg00579393 | 2  | 79316004  | REG1B       | 3 | EGFR, HER2 and pan-negative |
| cg22231902 | 2  | 119604901 | EN1         | 3 | EGFR, HER2 and pan-negative |
| cg22359606 | 2  | 182545492 | NEUROD1     | 3 | EGFR, HER2 and pan-negative |
| cg24879335 | 3  | 133465180 | TF          | 3 | EGFR, HER2 and pan-negative |
| cg17783509 | 4  | 41751001  | PHOX2B      | 3 | EGFR, HER2 and pan-negative |
| cg03963198 | 5  | 1882871   | IRX4        | 3 | EGFR, HER2 and pan-negative |
| cg12530080 | 5  | 22141639  | PMCHL1      | 3 | EGFR, HER2 and pan-negative |
| cg10660256 | 5  | 78407683  | BHMT        | 3 | EGFR, HER2 and pan-negative |
| cg05056120 | 5  | 158527702 | EBF1        | 3 | EGFR, HER2 and pan-negative |
| cg00546491 | 7  | 32111062  | PDE1C       | 3 | EGFR, HER2 and pan-negative |
| cg00333226 | 7  | 49813763  | VWC2        | 3 | EGFR, HER2 and pan-negative |
| cg15835825 | 7  | 154862030 | HTR5A       | 3 | EGFR, HER2 and pan-negative |
| cg07109287 | 9  | 126774073 | LHX2        | 3 | EGFR, HER2 and pan-negative |
| cg23771603 | 10 | 26223310  | MYO3A       | 3 | EGFR, HER2 and pan-negative |
| cg23828595 | 10 | 52833610  | PRKG1       | 3 | EGFR, HER2 and pan-negative |
| cg10175795 | 10 | 133109194 | TCERG1L     | 3 | EGFR, HER2 and pan-negative |
| cg08441806 | 10 | 134599149 | NKX6-2      | 3 | EGFR, HER2 and pan-negative |
| cg05840031 | 11 | 31832353  | PAX6        | 3 | EGFR, HER2 and pan-negative |
| cg04549333 | 11 | 44325823  | ALX4        | 3 | EGFR, HER2 and pan-negative |
| cg13807496 | 11 | 44332540  | ALX4        | 3 | EGFR, HER2 and pan-negative |
| cg20587394 | 12 | 54332209  | HOXC13      | 3 | EGFR, HER2 and pan-negative |
| cg12847373 | 13 | 78493349  | EDNRB       | 3 | EGFR, HER2 and pan-negative |
| cg04623955 | 14 | 102026376 | DIO3        | 3 | EGFR, HER2 and pan-negative |
| cg16571399 | 15 | 62939540  | TLN2        | 3 | EGFR, HER2 and pan-negative |
| cg24396745 | 15 | 73660614  | HCN4        | 3 | EGFR, HER2 and pan-negative |
| cg15736165 | 15 | 83951732  | BNC1        | 3 | EGFR, HER2 and pan-negative |
| cg27652350 | 15 | 101420989 | ALDH1A3     | 3 | EGFR, HER2 and pan-negative |
| cg10362591 | 16 | 55689865  | SLC6A2      | 3 | EGFR, HER2 and pan-negative |
| cg06818777 | 17 | 48546620  | CHAD        | 3 | EGFR, HER2 and pan-negative |
| cg10275770 | 17 | 62084205  | ICAM2       | 3 | EGFR, HER2 and pan-negative |
| cg00662556 | 18 | 74963364  | GALR1       | 3 | EGFR, HER2 and pan-negative |
| cg17861230 | 19 | 18343901  | PDE4C       | 3 | EGFR, HER2 and pan-negative |
| cg21461100 | 19 | 46477338  | NOVA2       | 3 | EGFR, HER2 and pan-negative |
| cg02501779 | 20 | 54579355  | CBLN4       | 3 | EGFR, HER2 and pan-negative |
| cg14546153 | 20 | 57090315  | APCDD1L-AS1 | 3 | EGFR, HER2 and pan-negative |
| cg23208152 | 3  | 50383134  | ZMYND10     | 3 | KRAS, ROS1 and pan-negative |
| cg18270343 | 8  | 143748005 | JRK         | 3 | KRAS, HER2 and pan-negative |
| cg08840010 | 1  | 8000314   | TNFRSF9     | 2 | ALK and pan-negative        |
| cg20692569 | 7  | 72848481  | FZD9        | 2 | ALK and pan-negative        |
| cg10482024 | 1  | 65613042  | AK4         | 2 | EGFR and ALK                |
| cg01359534 | 1  | 154293651 | AQP10       | 2 | EGFR and ALK                |
| cg24928687 | 1  | 226012913 | EPHX1       | 2 | EGFR and ALK                |
| cg11108890 | 2  | 85811471  | VAMP5       | 2 | EGFR and ALK                |
| cg19910382 | 2  | 88427561  | FABP1       | 2 | EGFR and ALK                |
| cg10062065 | 2  | 220308747 | PEG         | 2 | EGFR and ALK                |
| cg26153642 | 3  | 183818368 | HTR3E       | 2 | EGFR and ALK                |
| cg16776717 | 5  | 147163101 | JAKMIP2     | 2 | EGFR and ALK                |
| cg11884699 | 6  | 132023285 | OR2A4       | 2 | EGFR and ALK                |
| cg18705067 | 7  | 75914998  | SRRM3       | 2 | EGFR and ALK                |
| cg01581111 | 9  | 125028327 | RBM18       | 2 | EGFR and ALK                |
| cg10983208 | 10 | 73848320  | SPOCK2      | 2 | EGFR and ALK                |
| cg15227610 | 11 | 111782016 | CRYAB       | 2 | EGFR and ALK                |
| cg26202340 | 11 | 126152357 | TIRAP       | 2 | EGFR and ALK                |

|            |    |          |             |   |                       |
|------------|----|----------|-------------|---|-----------------------|
| cg08888956 | 12 | 86267839 | NTS         | 2 | EGFR and ALK          |
| cg06022562 | 17 | 80797881 | ZNF750      | 2 | EGFR and ALK          |
| cg21277505 | 19 | 50978348 | EMC10       | 2 | EGFR and ALK          |
| cg26457013 | 19 | 55740188 | TMEM86B     | 2 | EGFR and ALK          |
| cg23662675 | 20 | 45985596 | ZMYND8      | 2 | EGFR and KRAS         |
| cg03886110 | 0  | 0        | 0           | 2 | EGFR and pan-negative |
| cg02397514 | 1  | 935139   | HES4        | 2 | EGFR and pan-negative |
| cg19584957 | 1  | 1114579  | TLL1        | 2 | EGFR and pan-negative |
| cg22335801 | 1  | 1149091  | TNFRSF4     | 2 | EGFR and pan-negative |
| cg23867494 | 1  | 1150322  | TNFRSF4     | 2 | EGFR and pan-negative |
| cg13587552 | 1  | 1216441  | SCNN1D      | 2 | EGFR and pan-negative |
| cg22421766 | 1  | 1217658  | SCNN1D      | 2 | EGFR and pan-negative |
| cg20275133 | 1  | 1342361  | MRPL20      | 2 | EGFR and pan-negative |
| cg25234611 | 1  | 1371347  | VWA1        | 2 | EGFR and pan-negative |
| cg08528984 | 1  | 2985218  | PRDM16      | 2 | EGFR and pan-negative |
| cg24919884 | 1  | 3380288  | ARHGEF16    | 2 | EGFR and pan-negative |
| cg19135761 | 1  | 3567214  | WRAP73      | 2 | EGFR and pan-negative |
| cg04391111 | 1  | 3568004  | TP73        | 2 | EGFR and pan-negative |
| cg08670691 | 1  | 3668942  | CCDC27      | 2 | EGFR and pan-negative |
| cg10051054 | 1  | 3669172  | CCDC27      | 2 | EGFR and pan-negative |
| cg13614083 | 1  | 6085872  | KCNAB2      | 2 | EGFR and pan-negative |
| cg19814116 | 1  | 6086448  | KCNAB2      | 2 | EGFR and pan-negative |
| cg08080029 | 1  | 6239970  | CHD5        | 2 | EGFR and pan-negative |
| cg00282347 | 1  | 6241040  | CHD5        | 2 | EGFR and pan-negative |
| cg19180828 | 1  | 6265220  | RNF207      | 2 | EGFR and pan-negative |
| cg00030047 | 1  | 6268790  | RNF207      | 2 | EGFR and pan-negative |
| cg15731815 | 1  | 6269260  | RNF207      | 2 | EGFR and pan-negative |
| cg06940574 | 1  | 6297128  | LINC00337   | 2 | EGFR and pan-negative |
| cg14566624 | 1  | 6321582  | GPR153      | 2 | EGFR and pan-negative |
| cg25165880 | 1  | 6454326  | ACOT7       | 2 | EGFR and pan-negative |
| cg06859828 | 1  | 6526718  | TNFRSF25    | 2 | EGFR and pan-negative |
| cg19884658 | 1  | 6664268  | KLHL21      | 2 | EGFR and pan-negative |
| cg06778853 | 1  | 6672620  | PHF13       | 2 | EGFR and pan-negative |
| cg20668607 | 1  | 6762257  | DNAJC11     | 2 | EGFR and pan-negative |
| cg10500283 | 1  | 7913081  | UTS2        | 2 | EGFR and pan-negative |
| cg20625138 | 1  | 7913667  | UTS2        | 2 | EGFR and pan-negative |
| cg12711814 | 1  | 8939529  | ENO1        | 2 | EGFR and pan-negative |
| cg22601917 | 1  | 9294274  | H6PD        | 2 | EGFR and pan-negative |
| cg23166362 | 1  | 9711965  | PIK3CD      | 2 | EGFR and pan-negative |
| cg03406535 | 1  | 10056957 | RBP7        | 2 | EGFR and pan-negative |
| cg25397076 | 1  | 10057305 | RBP7        | 2 | EGFR and pan-negative |
| cg08151470 | 1  | 10092299 | UBE4B       | 2 | EGFR and pan-negative |
| cg09242541 | 1  | 10490025 | APITD1-CORT | 2 | EGFR and pan-negative |
| cg07894717 | 1  | 10508598 | CORT        | 2 | EGFR and pan-negative |
| cg00912942 | 1  | 11024484 | C1orf127    | 2 | EGFR and pan-negative |
| cg04508649 | 1  | 11249046 | ANGPTL7     | 2 | EGFR and pan-negative |
| cg15746187 | 1  | 11713123 | FBXO44      | 2 | EGFR and pan-negative |
| cg10667970 | 1  | 11724057 | FBXO6       | 2 | EGFR and pan-negative |
| cg06630737 | 1  | 11752109 | DRAXIN      | 2 | EGFR and pan-negative |
| cg06584407 | 1  | 11907324 | NPPA        | 2 | EGFR and pan-negative |
| cg20202438 | 1  | 11907986 | NPPA        | 2 | EGFR and pan-negative |
| cg15770654 | 1  | 12078821 | MIIP        | 2 | EGFR and pan-negative |
| cg19896198 | 1  | 12123262 | TNFRSF8     | 2 | EGFR and pan-negative |
| cg17897879 | 1  | 12123437 | TNFRSF8     | 2 | EGFR and pan-negative |
| cg26189983 | 1  | 12227700 | TNFRSF1B    | 2 | EGFR and pan-negative |
| cg01346152 | 1  | 12678761 | DHRS3       | 2 | EGFR and pan-negative |
| cg24338843 | 1  | 12806667 | C1orf158    | 2 | EGFR and pan-negative |
| cg09196942 | 1  | 12851619 | PRAMEF1     | 2 | EGFR and pan-negative |
| cg18807515 | 1  | 12916315 | PRAMEF2     | 2 | EGFR and pan-negative |
| cg03891191 | 1  | 12916998 | PRAMEF2     | 2 | EGFR and pan-negative |
| cg10743104 | 1  | 13910206 | PDPN        | 2 | EGFR and pan-negative |
| cg18877506 | 1  | 13910555 | PDPN        | 2 | EGFR and pan-negative |
| cg25402049 | 1  | 14029875 | PRDM2       | 2 | EGFR and pan-negative |
| cg21045388 | 1  | 15428172 | KAZN        | 2 | EGFR and pan-negative |
| cg15319451 | 1  | 15480748 | TMEM51      | 2 | EGFR and pan-negative |
| cg05385377 | 1  | 15480844 | TMEM51      | 2 | EGFR and pan-negative |
| cg05221264 | 1  | 15783513 | CELA2A      | 2 | EGFR and pan-negative |
| cg24030609 | 1  | 15802611 | CELA2B      | 2 | EGFR and pan-negative |
| cg07846167 | 1  | 16084758 | FBLIM1      | 2 | EGFR and pan-negative |
| cg23002761 | 1  | 16085642 | FBLIM1      | 2 | EGFR and pan-negative |
| cg08887581 | 1  | 16330716 | C1orf64     | 2 | EGFR and pan-negative |
| cg27210447 | 1  | 16348849 | CLCNKA      | 2 | EGFR and pan-negative |
| cg13770446 | 1  | 16349792 | CLCNKA      | 2 | EGFR and pan-negative |
| cg15415507 | 1  | 16482553 | EPHA2       | 2 | EGFR and pan-negative |
| cg18669381 | 1  | 16539088 | ARHGEF19    | 2 | EGFR and pan-negative |
| cg26845278 | 1  | 16763671 | SPATA21     | 2 | EGFR and pan-negative |
| cg18679190 | 1  | 17308781 | MFAP2       | 2 | EGFR and pan-negative |
| cg15185794 | 1  | 17446087 | PADI2       | 2 | EGFR and pan-negative |
| cg19685066 | 1  | 18082003 | ACTL8       | 2 | EGFR and pan-negative |
| cg23349790 | 1  | 18434576 | IGSF21      | 2 | EGFR and pan-negative |
| cg13507429 | 1  | 18807550 | KLHDC7A     | 2 | EGFR and pan-negative |
| cg11428724 | 1  | 18957632 | PAX7        | 2 | EGFR and pan-negative |
| cg11376198 | 1  | 19600730 | AKR7L       | 2 | EGFR and pan-negative |
| cg23519022 | 1  | 19746204 | CAPZB       | 2 | EGFR and pan-negative |
| cg13319175 | 1  | 19746564 | CAPZB       | 2 | EGFR and pan-negative |
| cg19136075 | 1  | 19968885 | NBL1        | 2 | EGFR and pan-negative |
| cg10741760 | 1  | 19992024 | HTR6        | 2 | EGFR and pan-negative |
| cg04994456 | 1  | 20141662 | RNF186      | 2 | EGFR and pan-negative |
| cg09195271 | 1  | 20142497 | RNF186      | 2 | EGFR and pan-negative |
| cg22220722 | 1  | 20306641 | PLA2G2A     | 2 | EGFR and pan-negative |
| cg19521927 | 1  | 20395367 | PLA2G5      | 2 | EGFR and pan-negative |
| cg04637372 | 1  | 20617456 | VWA5B1      | 2 | EGFR and pan-negative |
| cg08398233 | 1  | 20811641 | CAMK2N1     | 2 | EGFR and pan-negative |
| cg26557658 | 1  | 20878787 | FAM43B      | 2 | EGFR and pan-negative |
| cg00750606 | 1  | 20899121 | 0           | 2 | EGFR and pan-negative |

|            |   |          |           |   |                       |
|------------|---|----------|-----------|---|-----------------------|
| cg08911391 | 1 | 20988590 | DDOST     | 2 | EGFR and pan-negative |
| cg26885858 | 1 | 21766368 | NBPF3     | 2 | EGFR and pan-negative |
| cg23352747 | 1 | 21835436 | ALPL      | 2 | EGFR and pan-negative |
| cg22396755 | 1 | 21995097 | RAP1GAP   | 2 | EGFR and pan-negative |
| cg07138512 | 1 | 21996317 | RAP1GAP   | 2 | EGFR and pan-negative |
| cg03133269 | 1 | 22468902 | WNT4      | 2 | EGFR and pan-negative |
| cg11847808 | 1 | 22889611 | EPHA8     | 2 | EGFR and pan-negative |
| cg02194878 | 1 | 22890278 | EPHA8     | 2 | EGFR and pan-negative |
| cg11393848 | 1 | 22969340 | C1QC      | 2 | EGFR and pan-negative |
| cg00136477 | 1 | 22970339 | C1QC      | 2 | EGFR and pan-negative |
| cg22477971 | 1 | 22984594 | C1QB      | 2 | EGFR and pan-negative |
| cg03941108 | 1 | 22985937 | C1QB      | 2 | EGFR and pan-negative |
| cg08872493 | 1 | 23521417 | HTR1D     | 2 | EGFR and pan-negative |
| cg20887241 | 1 | 23522636 | HTR1D     | 2 | EGFR and pan-negative |
| cg10347418 | 1 | 23693926 | ZNF436    | 2 | EGFR and pan-negative |
| cg26151675 | 1 | 24240069 | CNR2      | 2 | EGFR and pan-negative |
| cg15050111 | 1 | 24645850 | GRHL3     | 2 | EGFR and pan-negative |
| cg16155382 | 1 | 24646191 | GRHL3     | 2 | EGFR and pan-negative |
| cg02641560 | 1 | 24828811 | RCAN3     | 2 | EGFR and pan-negative |
| cg00117172 | 1 | 25255838 | RUNX3     | 2 | EGFR and pan-negative |
| cg22737001 | 1 | 25257029 | RUNX3     | 2 | EGFR and pan-negative |
| cg24019564 | 1 | 25257566 | RUNX3     | 2 | EGFR and pan-negative |
| cg03171924 | 1 | 25258332 | RUNX3     | 2 | EGFR and pan-negative |
| cg14182690 | 1 | 25290947 | RUNX3     | 2 | EGFR and pan-negative |
| cg13461622 | 1 | 25291385 | RUNX3     | 2 | EGFR and pan-negative |
| cg06037693 | 1 | 25292072 | RUNX3     | 2 | EGFR and pan-negative |
| cg06388544 | 1 | 25598878 | RHD       | 2 | EGFR and pan-negative |
| cg24857721 | 1 | 25599055 | RHD       | 2 | EGFR and pan-negative |
| cg15156836 | 1 | 26126415 | SEPN1     | 2 | EGFR and pan-negative |
| cg15662251 | 1 | 26197855 | PAQR7     | 2 | EGFR and pan-negative |
| cg04471507 | 1 | 26233376 | STMN1     | 2 | EGFR and pan-negative |
| cg23323671 | 1 | 26233623 | STMN1     | 2 | EGFR and pan-negative |
| cg04629204 | 1 | 26348325 | EXTL1     | 2 | EGFR and pan-negative |
| cg05674944 | 1 | 26372290 | SLC30A2   | 2 | EGFR and pan-negative |
| cg07766612 | 1 | 26372887 | SLC30A2   | 2 | EGFR and pan-negative |
| cg13998293 | 1 | 26394435 | TRIM63    | 2 | EGFR and pan-negative |
| cg11418559 | 1 | 26487928 | FAM110D   | 2 | EGFR and pan-negative |
| cg25229964 | 1 | 26503623 | CNKSR1    | 2 | EGFR and pan-negative |
| cg13553204 | 1 | 26504548 | CNKSR1    | 2 | EGFR and pan-negative |
| cg16530429 | 1 | 26737470 | LIN28A    | 2 | EGFR and pan-negative |
| cg20345978 | 1 | 26798271 | HMGN2     | 2 | EGFR and pan-negative |
| cg01031251 | 1 | 26855423 | RPS6KA1   | 2 | EGFR and pan-negative |
| cg03421300 | 1 | 27189787 | SFN       | 2 | EGFR and pan-negative |
| cg05436231 | 1 | 27709789 | CD164L2   | 2 | EGFR and pan-negative |
| cg15166089 | 1 | 27710030 | CD164L2   | 2 | EGFR and pan-negative |
| cg17386433 | 1 | 28052708 | FAM76A    | 2 | EGFR and pan-negative |
| cg08623383 | 1 | 28205926 | THEMIS2   | 2 | EGFR and pan-negative |
| cg01172735 | 1 | 28586943 | SESN2     | 2 | EGFR and pan-negative |
| cg11226328 | 1 | 29213367 | EPB41     | 2 | EGFR and pan-negative |
| cg18084114 | 1 | 31197218 | MATN1     | 2 | EGFR and pan-negative |
| cg12864581 | 1 | 31660916 | NKAIN1    | 2 | EGFR and pan-negative |
| cg19420968 | 1 | 32084964 | HCRTR1    | 2 | EGFR and pan-negative |
| cg02989257 | 1 | 32169274 | COL16A1   | 2 | EGFR and pan-negative |
| cg06397510 | 1 | 32403634 | PTP4A2    | 2 | EGFR and pan-negative |
| cg26073060 | 1 | 32686736 | TMEM234   | 2 | EGFR and pan-negative |
| cg12278770 | 1 | 32712780 | FAM167B   | 2 | EGFR and pan-negative |
| cg17078393 | 1 | 32717002 | LCK       | 2 | EGFR and pan-negative |
| cg23698287 | 1 | 32758300 | HDAC1     | 2 | EGFR and pan-negative |
| cg21172540 | 1 | 32827840 | FAM229A   | 2 | EGFR and pan-negative |
| cg13666729 | 1 | 32930473 | ZBTB8B    | 2 | EGFR and pan-negative |
| cg11619390 | 1 | 32931179 | ZBTB8B    | 2 | EGFR and pan-negative |
| cg18118795 | 1 | 33117735 | RBBP4     | 2 | EGFR and pan-negative |
| cg25870263 | 1 | 33335831 | FNDC5     | 2 | EGFR and pan-negative |
| cg24417499 | 1 | 33351653 | HPCA      | 2 | EGFR and pan-negative |
| cg13306164 | 1 | 33352184 | HPCA      | 2 | EGFR and pan-negative |
| cg05382123 | 1 | 34632585 | C1orf94   | 2 | EGFR and pan-negative |
| cg11524446 | 1 | 34642184 | C1orf94   | 2 | EGFR and pan-negative |
| cg08612871 | 1 | 35220334 | GJB5      | 2 | EGFR and pan-negative |
| cg01333788 | 1 | 35220814 | GJB5      | 2 | EGFR and pan-negative |
| cg15750705 | 1 | 35226707 | GJB4      | 2 | EGFR and pan-negative |
| cg15554401 | 1 | 35226891 | GJB4      | 2 | EGFR and pan-negative |
| cg07070934 | 1 | 35258435 | GJA4      | 2 | EGFR and pan-negative |
| cg15006973 | 1 | 35258933 | GJA4      | 2 | EGFR and pan-negative |
| cg14772955 | 1 | 36024404 | NCDN      | 2 | EGFR and pan-negative |
| cg15272684 | 1 | 36024473 | NCDN      | 2 | EGFR and pan-negative |
| cg11835197 | 1 | 36038514 | TFAP2E    | 2 | EGFR and pan-negative |
| cg18931815 | 1 | 36565772 | COL8A2    | 2 | EGFR and pan-negative |
| cg19046959 | 1 | 36565856 | COL8A2    | 2 | EGFR and pan-negative |
| cg09088576 | 1 | 36947785 | CSF3R     | 2 | EGFR and pan-negative |
| cg15949277 | 1 | 37939724 | LOC728431 | 2 | EGFR and pan-negative |
| cg21488617 | 1 | 38022586 | DNAL1     | 2 | EGFR and pan-negative |
| cg06626655 | 1 | 38099916 | RSP01     | 2 | EGFR and pan-negative |
| cg22063989 | 1 | 38100795 | RSP01     | 2 | EGFR and pan-negative |
| cg07447922 | 1 | 38230827 | EPHA10    | 2 | EGFR and pan-negative |
| cg07031996 | 1 | 38324738 | MTF1      | 2 | EGFR and pan-negative |
| cg10784030 | 1 | 38412688 | INPP5B    | 2 | EGFR and pan-negative |
| cg02309273 | 1 | 38412744 | INPP5B    | 2 | EGFR and pan-negative |
| cg17791651 | 1 | 38513489 | POU3F1    | 2 | EGFR and pan-negative |
| cg22233974 | 1 | 39546511 | 0         | 2 | EGFR and pan-negative |
| cg21280510 | 1 | 40137089 | NT5C1A    | 2 | EGFR and pan-negative |
| cg11462533 | 1 | 40156840 | HPCAL4    | 2 | EGFR and pan-negative |
| cg04144788 | 1 | 40236420 | OXC22     | 2 | EGFR and pan-negative |
| cg27650434 | 1 | 40368189 | MYCL      | 2 | EGFR and pan-negative |
| cg20900524 | 1 | 40563271 | PPT1      | 2 | EGFR and pan-negative |
| cg00594952 | 1 | 41130641 | RIMS3     | 2 | EGFR and pan-negative |

|            |   |          |             |   |                       |
|------------|---|----------|-------------|---|-----------------------|
| cg22748573 | 1 | 41327924 | CITED4      | 2 | EGFR and pan-negative |
| cg03387723 | 1 | 41708464 | SCMH1       | 2 | EGFR and pan-negative |
| cg27238470 | 1 | 41950325 | EDN2        | 2 | EGFR and pan-negative |
| cg23762517 | 1 | 42384310 | HIVEP3      | 2 | EGFR and pan-negative |
| cg17100200 | 1 | 42618313 | GUCA2B      | 2 | EGFR and pan-negative |
| cg11075745 | 1 | 43205976 | CLDN19      | 2 | EGFR and pan-negative |
| cg04355435 | 1 | 43736290 | TMEM125     | 2 | EGFR and pan-negative |
| cg09988116 | 1 | 43750693 | C1orf210    | 2 | EGFR and pan-negative |
| cg14036856 | 1 | 43751563 | C1orf210    | 2 | EGFR and pan-negative |
| cg16109297 | 1 | 43824900 | CDC20       | 2 | EGFR and pan-negative |
| cg16570917 | 1 | 43996062 | PTPRF       | 2 | EGFR and pan-negative |
| cg22930187 | 1 | 44398959 | ARTN        | 2 | EGFR and pan-negative |
| cg18202456 | 1 | 44584930 | KLF17       | 2 | EGFR and pan-negative |
| cg04609640 | 1 | 45254092 | BEST4       | 2 | EGFR and pan-negative |
| cg15329642 | 1 | 45308298 | PTCH2       | 2 | EGFR and pan-negative |
| cg21942576 | 1 | 46126885 | GPBP1L1     | 2 | EGFR and pan-negative |
| cg04975920 | 1 | 46646224 | TSPAN1      | 2 | EGFR and pan-negative |
| cg04036898 | 1 | 46664598 | POMGNT1     | 2 | EGFR and pan-negative |
| cg08032971 | 1 | 46972736 | DMBX1       | 2 | EGFR and pan-negative |
| cg19714296 | 1 | 47407400 | CYP4A11     | 2 | EGFR and pan-negative |
| cg16689634 | 1 | 47489539 | CYP4X1      | 2 | EGFR and pan-negative |
| cg07810156 | 1 | 47655682 | PDZK1IP1    | 2 | EGFR and pan-negative |
| cg15187606 | 1 | 47656853 | PDZK1IP1    | 2 | EGFR and pan-negative |
| cg00875272 | 1 | 47695321 | TAL1        | 2 | EGFR and pan-negative |
| cg18815943 | 1 | 47882314 | FOXE3       | 2 | EGFR and pan-negative |
| cg14106085 | 1 | 47902269 | FOXO2       | 2 | EGFR and pan-negative |
| cg18242139 | 1 | 50574837 | ELAVL4      | 2 | EGFR and pan-negative |
| cg01172972 | 1 | 52608558 | ZFYVE9      | 2 | EGFR and pan-negative |
| cg22129364 | 1 | 53067894 | GPX7        | 2 | EGFR and pan-negative |
| cg14261309 | 1 | 53164287 | SELRC1      | 2 | EGFR and pan-negative |
| cg13461509 | 1 | 53387576 | ECHDC2      | 2 | EGFR and pan-negative |
| cg16028753 | 1 | 53527435 | PODN        | 2 | EGFR and pan-negative |
| cg23092823 | 1 | 53528612 | PODN        | 2 | EGFR and pan-negative |
| cg08970446 | 1 | 53608262 | SLC1A7      | 2 | EGFR and pan-negative |
| cg01100796 | 1 | 53662040 | CPT2        | 2 | EGFR and pan-negative |
| cg24845207 | 1 | 53924998 | DMRTB1      | 2 | EGFR and pan-negative |
| cg26185508 | 1 | 54619445 | CDGCP2      | 2 | EGFR and pan-negative |
| cg20777437 | 1 | 54619703 | CDGCP2      | 2 | EGFR and pan-negative |
| cg12514620 | 1 | 54871858 | SSBP3       | 2 | EGFR and pan-negative |
| cg21448423 | 1 | 55013956 | ACOT11      | 2 | EGFR and pan-negative |
| cg24051818 | 1 | 55107918 | HEATR8-TTC4 | 2 | EGFR and pan-negative |
| cg22130834 | 1 | 55267046 | TTC22       | 2 | EGFR and pan-negative |
| cg10073091 | 1 | 55352301 | DHCR24      | 2 | EGFR and pan-negative |
| cg14615807 | 1 | 55464173 | BSND        | 2 | EGFR and pan-negative |
| cg13191808 | 1 | 55505327 | PCSK9       | 2 | EGFR and pan-negative |
| cg00848728 | 1 | 58716018 | DAB1        | 2 | EGFR and pan-negative |
| cg18870231 | 1 | 60539135 | C1orf87     | 2 | EGFR and pan-negative |
| cg09851465 | 1 | 60539671 | C1orf87     | 2 | EGFR and pan-negative |
| cg14850026 | 1 | 62660191 | L1TD1       | 2 | EGFR and pan-negative |
| cg07558455 | 1 | 62784762 | KANK4       | 2 | EGFR and pan-negative |
| cg00625425 | 1 | 62785512 | KANK4       | 2 | EGFR and pan-negative |
| cg21877855 | 1 | 63989125 | EFCAB7      | 2 | EGFR and pan-negative |
| cg27303880 | 1 | 64240188 | ROR1        | 2 | EGFR and pan-negative |
| cg02755455 | 1 | 65352382 | JAK1        | 2 | EGFR and pan-negative |
| cg15997411 | 1 | 65352384 | JAK1        | 2 | EGFR and pan-negative |
| cg26304237 | 1 | 65730384 | DNAJC6      | 2 | EGFR and pan-negative |
| cg09082287 | 1 | 65730494 | DNAJC6      | 2 | EGFR and pan-negative |
| cg26832142 | 1 | 66258441 | PDE4B       | 2 | EGFR and pan-negative |
| cg17819635 | 1 | 67217673 | TCTEX1D1    | 2 | EGFR and pan-negative |
| cg04979933 | 1 | 67266801 | INSL5       | 2 | EGFR and pan-negative |
| cg23744433 | 1 | 67390759 | MIER1       | 2 | EGFR and pan-negative |
| cg27416067 | 1 | 67773128 | IL12RB2     | 2 | EGFR and pan-negative |
| cg22901840 | 1 | 68512777 | DIRAS3      | 2 | EGFR and pan-negative |
| cg13697378 | 1 | 68512845 | DIRAS3      | 2 | EGFR and pan-negative |
| cg09768051 | 1 | 70224402 | LRRC7       | 2 | EGFR and pan-negative |
| cg10576828 | 1 | 70225863 | LRRC7       | 2 | EGFR and pan-negative |
| cg19342782 | 1 | 70821806 | HHLA3       | 2 | EGFR and pan-negative |
| cg15201877 | 1 | 71512973 | PTGER3      | 2 | EGFR and pan-negative |
| cg04645342 | 1 | 72748124 | NEGR1       | 2 | EGFR and pan-negative |
| cg01425670 | 1 | 72749015 | NEGR1       | 2 | EGFR and pan-negative |
| cg27336379 | 1 | 76078230 | SLC44A5     | 2 | EGFR and pan-negative |
| cg17041296 | 1 | 76397847 | ASB17       | 2 | EGFR and pan-negative |
| cg26363196 | 1 | 76540236 | ST6GALNAC3  | 2 | EGFR and pan-negative |
| cg12601757 | 1 | 76540465 | ST6GALNAC3  | 2 | EGFR and pan-negative |
| cg13823136 | 1 | 77333138 | ST6GALNAC5  | 2 | EGFR and pan-negative |
| cg25604883 | 1 | 77747387 | AK5         | 2 | EGFR and pan-negative |
| cg26466094 | 1 | 77748129 | AK5         | 2 | EGFR and pan-negative |
| cg09107315 | 1 | 78511488 | GIPC2       | 2 | EGFR and pan-negative |
| cg24022301 | 1 | 78956570 | PTGFR       | 2 | EGFR and pan-negative |
| cg03495868 | 1 | 78956905 | PTGFR       | 2 | EGFR and pan-negative |
| cg17980508 | 1 | 79085713 | IFI44L      | 2 | EGFR and pan-negative |
| cg07107453 | 1 | 79114976 | IFI44       | 2 | EGFR and pan-negative |
| cg08235271 | 1 | 82266030 | LPHN2       | 2 | EGFR and pan-negative |
| cg17870792 | 1 | 82266841 | LPHN2       | 2 | EGFR and pan-negative |
| cg03622431 | 1 | 84864880 | DNASE2B     | 2 | EGFR and pan-negative |
| cg10515956 | 1 | 85514610 | MCOLN3      | 2 | EGFR and pan-negative |
| cg23665568 | 1 | 85745053 | O           | 2 | EGFR and pan-negative |
| cg14322224 | 1 | 85931226 | DDAH1       | 2 | EGFR and pan-negative |
| cg27462398 | 1 | 86174642 | ZNHIT6      | 2 | EGFR and pan-negative |
| cg14540297 | 1 | 87597473 | LOC339524   | 2 | EGFR and pan-negative |
| cg13406950 | 1 | 89530664 | GBP1        | 2 | EGFR and pan-negative |
| cg26247501 | 1 | 89642561 | GBP7        | 2 | EGFR and pan-negative |
| cg27285720 | 1 | 89664782 | GBP4        | 2 | EGFR and pan-negative |
| cg17740305 | 1 | 89738358 | GBP5        | 2 | EGFR and pan-negative |
| cg15422784 | 1 | 90023713 | LRRC8B      | 2 | EGFR and pan-negative |

|            |   |           |              |   |                       |
|------------|---|-----------|--------------|---|-----------------------|
| cg06641366 | 1 | 90097604  | FLJ27354     | 2 | EGFR and pan-negative |
| cg26783856 | 1 | 90287523  | LRRC8D       | 2 | EGFR and pan-negative |
| cg06384463 | 1 | 91182708  | BARHL2       | 2 | EGFR and pan-negative |
| cg11119884 | 1 | 91818587  | HFM1         | 2 | EGFR and pan-negative |
| cg00563926 | 1 | 92352481  | TGFBR3       | 2 | EGFR and pan-negative |
| cg14732540 | 1 | 92414722  | BRDT         | 2 | EGFR and pan-negative |
| cg00307685 | 1 | 92415524  | BRDT         | 2 | EGFR and pan-negative |
| cg13984181 | 1 | 92495720  | EPHX4        | 2 | EGFR and pan-negative |
| cg26580095 | 1 | 92545650  | BTBD8        | 2 | EGFR and pan-negative |
| cg22341104 | 1 | 92952261  | GF11         | 2 | EGFR and pan-negative |
| cg20125091 | 1 | 92952641  | GF11         | 2 | EGFR and pan-negative |
| cg10989326 | 1 | 93258908  | EV15         | 2 | EGFR and pan-negative |
| cg01185754 | 1 | 95006729  | F3           | 2 | EGFR and pan-negative |
| cg22424108 | 1 | 95285531  | SLC44A3      | 2 | EGFR and pan-negative |
| cg19514928 | 1 | 95583636  | TMEM56-RWDD3 | 2 | EGFR and pan-negative |
| cg05596294 | 1 | 99729757  | LPPR4        | 2 | EGFR and pan-negative |
| cg26164310 | 1 | 99729780  | LPPR4        | 2 | EGFR and pan-negative |
| cg20166532 | 1 | 101702782 | S1PR1        | 2 | EGFR and pan-negative |
| cg12884406 | 1 | 103573989 | COL11A1      | 2 | EGFR and pan-negative |
| cg26256793 | 1 | 103574469 | COL11A1      | 2 | EGFR and pan-negative |
| cg15573237 | 1 | 104159187 | AMY2A        | 2 | EGFR and pan-negative |
| cg26507477 | 1 | 104197869 | AMY1A        | 2 | EGFR and pan-negative |
| cg26145228 | 1 | 107682504 | NTNG1        | 2 | EGFR and pan-negative |
| cg02361557 | 1 | 107682963 | NTNG1        | 2 | EGFR and pan-negative |
| cg24662718 | 1 | 108507468 | VAV3         | 2 | EGFR and pan-negative |
| cg19918758 | 1 | 108508113 | VAV3         | 2 | EGFR and pan-negative |
| cg08460435 | 1 | 109203610 | HENMT1       | 2 | EGFR and pan-negative |
| cg00328227 | 1 | 109204325 | HENMT1       | 2 | EGFR and pan-negative |
| cg03301801 | 1 | 109264283 | FNDC7        | 2 | EGFR and pan-negative |
| cg19221369 | 1 | 109618856 | TAF13        | 2 | EGFR and pan-negative |
| cg17034109 | 1 | 110036417 | CYB561D1     | 2 | EGFR and pan-negative |
| cg00521434 | 1 | 110081965 | GPR61        | 2 | EGFR and pan-negative |
| cg23749046 | 1 | 110082924 | GPR61        | 2 | EGFR and pan-negative |
| cg06956273 | 1 | 110155623 | GNAT2        | 2 | EGFR and pan-negative |
| cg20885089 | 1 | 110162701 | AMPD2        | 2 | EGFR and pan-negative |
| cg15955341 | 1 | 110198890 | GSTM4        | 2 | EGFR and pan-negative |
| cg16670497 | 1 | 110210913 | GSTM2        | 2 | EGFR and pan-negative |
| cg04987894 | 1 | 110254616 | GSTM5        | 2 | EGFR and pan-negative |
| cg23719124 | 1 | 110254919 | GSTM5        | 2 | EGFR and pan-negative |
| cg23472215 | 1 | 110282815 | GSTM3        | 2 | EGFR and pan-negative |
| cg00515905 | 1 | 110306507 | EPS8L3       | 2 | EGFR and pan-negative |
| cg00491404 | 1 | 110306591 | EPS8L3       | 2 | EGFR and pan-negative |
| cg21324308 | 1 | 110993852 | PROK1        | 2 | EGFR and pan-negative |
| cg07830847 | 1 | 111061374 | KCNA10       | 2 | EGFR and pan-negative |
| cg12604192 | 1 | 111062127 | KCNA10       | 2 | EGFR and pan-negative |
| cg22165175 | 1 | 111148915 | KCNA2        | 2 | EGFR and pan-negative |
| cg03483626 | 1 | 111218276 | KCNA3        | 2 | EGFR and pan-negative |
| cg00995520 | 1 | 111218282 | KCNA3        | 2 | EGFR and pan-negative |
| cg10516886 | 1 | 111415232 | CD53         | 2 | EGFR and pan-negative |
| cg22325572 | 1 | 111416181 | CD53         | 2 | EGFR and pan-negative |
| cg00619207 | 1 | 111743368 | DENND2D      | 2 | EGFR and pan-negative |
| cg22957381 | 1 | 112532078 | KCNQ3        | 2 | EGFR and pan-negative |
| cg10834677 | 1 | 113263289 | FAM19A3      | 2 | EGFR and pan-negative |
| cg13966710 | 1 | 113392781 | LOC100996702 | 2 | EGFR and pan-negative |
| cg14385738 | 1 | 114414340 | PTPN22       | 2 | EGFR and pan-negative |
| cg17253459 | 1 | 114522670 | OLFML3       | 2 | EGFR and pan-negative |
| cg05368341 | 1 | 114696465 | SYT6         | 2 | EGFR and pan-negative |
| cg22646710 | 1 | 114696798 | SYT6         | 2 | EGFR and pan-negative |
| cg23523368 | 1 | 115238494 | AMPD1        | 2 | EGFR and pan-negative |
| cg17696091 | 1 | 115396629 | SYCP1        | 2 | EGFR and pan-negative |
| cg03614513 | 1 | 115632038 | TSPAN2       | 2 | EGFR and pan-negative |
| cg22572159 | 1 | 115880646 | NGF          | 2 | EGFR and pan-negative |
| cg05190718 | 1 | 116310712 | CASQ2        | 2 | EGFR and pan-negative |
| cg18942631 | 1 | 116311341 | CASQ2        | 2 | EGFR and pan-negative |
| cg09580336 | 1 | 116915122 | ATP1A1       | 2 | EGFR and pan-negative |
| cg22424746 | 1 | 117753313 | VTCN1        | 2 | EGFR and pan-negative |
| cg27446185 | 1 | 117753965 | VTCN1        | 2 | EGFR and pan-negative |
| cg16579646 | 1 | 120048352 | HSD3B1       | 2 | EGFR and pan-negative |
| cg07090813 | 1 | 120254330 | PHGDH        | 2 | EGFR and pan-negative |
| cg23326301 | 1 | 120439812 | ADAM30       | 2 | EGFR and pan-negative |
| cg05511517 | 1 | 120612730 | NOTCH2       | 2 | EGFR and pan-negative |
| cg11718090 | 1 | 145208654 | NOTCH2NL     | 2 | EGFR and pan-negative |
| cg17036737 | 1 | 145507675 | RBM8A        | 2 | EGFR and pan-negative |
| cg04126335 | 1 | 145525223 | ITGA10       | 2 | EGFR and pan-negative |
| cg08614201 | 1 | 145715134 | CD160        | 2 | EGFR and pan-negative |
| cg12832565 | 1 | 145715672 | CD160        | 2 | EGFR and pan-negative |
| cg01377755 | 1 | 147143258 | ACP6         | 2 | EGFR and pan-negative |
| cg10904672 | 1 | 149753367 | FCGR1A       | 2 | EGFR and pan-negative |
| cg19464944 | 1 | 149754000 | FCGR1A       | 2 | EGFR and pan-negative |
| cg14415300 | 1 | 149813944 | HIST2H2AA4   | 2 | EGFR and pan-negative |
| cg16387606 | 1 | 149832652 | HIST2H4B     | 2 | EGFR and pan-negative |
| cg03086563 | 1 | 149857152 | HIST2H2BE    | 2 | EGFR and pan-negative |
| cg01705587 | 1 | 149889364 | SV2A         | 2 | EGFR and pan-negative |
| cg12072973 | 1 | 150121727 | PLEKHO1      | 2 | EGFR and pan-negative |
| cg01371477 | 1 | 150207822 | ANP32E       | 2 | EGFR and pan-negative |
| cg16501235 | 1 | 150245988 | C1orf54      | 2 | EGFR and pan-negative |
| cg04863713 | 1 | 150521201 | ADAMTSL4     | 2 | EGFR and pan-negative |
| cg26087862 | 1 | 150602029 | ENSA         | 2 | EGFR and pan-negative |
| cg20802392 | 1 | 150780684 | CTSK         | 2 | EGFR and pan-negative |
| cg11946165 | 1 | 150781434 | CTSK         | 2 | EGFR and pan-negative |
| cg17942553 | 1 | 150850380 | ARNT         | 2 | EGFR and pan-negative |
| cg07337598 | 1 | 150953943 | ANXA9        | 2 | EGFR and pan-negative |
| cg20437604 | 1 | 150954554 | ANXA9        | 2 | EGFR and pan-negative |
| cg07495664 | 1 | 150978905 | FAM63A       | 2 | EGFR and pan-negative |
| cg06433658 | 1 | 150979092 | FAM63A       | 2 | EGFR and pan-negative |

|            |   |           |                 |   |                       |
|------------|---|-----------|-----------------|---|-----------------------|
| cg10895130 | 1 | 151007925 | <i>BNIP1</i>    | 2 | EGFR and pan-negative |
| cg07139440 | 1 | 151030981 | <i>CDC42SE1</i> | 2 | EGFR and pan-negative |
| cg24262376 | 1 | 151137274 | <i>LYSMD1</i>   | 2 | EGFR and pan-negative |
| cg11928198 | 1 | 151137319 | <i>LYSMD1</i>   | 2 | EGFR and pan-negative |
| cg03718677 | 1 | 151148266 | <i>TMOD4</i>    | 2 | EGFR and pan-negative |
| cg18598959 | 1 | 151298666 | <i>PI4KB</i>    | 2 | EGFR and pan-negative |
| cg10545682 | 1 | 151512625 | <i>TUFT1</i>    | 2 | EGFR and pan-negative |
| cg25112191 | 1 | 151804260 | <i>RORC</i>     | 2 | EGFR and pan-negative |
| cg10795646 | 1 | 151975566 | <i>0</i>        | 2 | EGFR and pan-negative |
| cg10673431 | 1 | 152010110 | <i>S100A11</i>  | 2 | EGFR and pan-negative |
| cg13447818 | 1 | 152298884 | <i>FLG</i>      | 2 | EGFR and pan-negative |
| cg26390526 | 1 | 152299078 | <i>FLG</i>      | 2 | EGFR and pan-negative |
| cg19370451 | 1 | 152386561 | <i>CRNN</i>     | 2 | EGFR and pan-negative |
| cg16713808 | 1 | 152388040 | <i>CRNN</i>     | 2 | EGFR and pan-negative |
| cg05248781 | 1 | 152483199 | <i>LCE5A</i>    | 2 | EGFR and pan-negative |
| cg11750883 | 1 | 152486950 | <i>CRCT1</i>    | 2 | EGFR and pan-negative |
| cg12588301 | 1 | 152487335 | <i>CRCT1</i>    | 2 | EGFR and pan-negative |
| cg23110514 | 1 | 152538888 | <i>LCE3E</i>    | 2 | EGFR and pan-negative |
| cg20676475 | 1 | 152552494 | <i>LCE3D</i>    | 2 | EGFR and pan-negative |
| cg03741352 | 1 | 152573450 | <i>LCE3C</i>    | 2 | EGFR and pan-negative |
| cg26135325 | 1 | 152595322 | <i>LCE3A</i>    | 2 | EGFR and pan-negative |
| cg26466858 | 1 | 152595842 | <i>LCE3A</i>    | 2 | EGFR and pan-negative |
| cg21312148 | 1 | 152636074 | <i>LCE2D</i>    | 2 | EGFR and pan-negative |
| cg00406188 | 1 | 152647216 | <i>LCE2C</i>    | 2 | EGFR and pan-negative |
| cg03960217 | 1 | 152647777 | <i>LCE2C</i>    | 2 | EGFR and pan-negative |
| cg25098401 | 1 | 152658407 | <i>LCE2B</i>    | 2 | EGFR and pan-negative |
| cg21754343 | 1 | 152658797 | <i>LCE2B</i>    | 2 | EGFR and pan-negative |
| cg13697387 | 1 | 152670843 | <i>LCE2A</i>    | 2 | EGFR and pan-negative |
| cg21846488 | 1 | 152680843 | <i>LCE4A</i>    | 2 | EGFR and pan-negative |
| cg17542385 | 1 | 152681979 | <i>0</i>        | 2 | EGFR and pan-negative |
| cg23413307 | 1 | 152747472 | <i>LCE1F</i>    | 2 | EGFR and pan-negative |
| cg21065959 | 1 | 152758755 | <i>LCE1E</i>    | 2 | EGFR and pan-negative |
| cg15531099 | 1 | 152770502 | <i>LCE1D</i>    | 2 | EGFR and pan-negative |
| cg24304714 | 1 | 152779374 | <i>LCE1C</i>    | 2 | EGFR and pan-negative |
| cg21434954 | 1 | 152783137 | <i>LCE1B</i>    | 2 | EGFR and pan-negative |
| cg08878744 | 1 | 152783674 | <i>LCE1B</i>    | 2 | EGFR and pan-negative |
| cg14696820 | 1 | 152800168 | <i>LCE1A</i>    | 2 | EGFR and pan-negative |
| cg21948655 | 1 | 152849738 | <i>SMCP</i>     | 2 | EGFR and pan-negative |
| cg09542291 | 1 | 152850992 | <i>SMCP</i>     | 2 | EGFR and pan-negative |
| cg25082710 | 1 | 152880108 | <i>IVL</i>      | 2 | EGFR and pan-negative |
| cg05440289 | 1 | 152881119 | <i>IVL</i>      | 2 | EGFR and pan-negative |
| cg02202484 | 1 | 152942688 | <i>SPRR4</i>    | 2 | EGFR and pan-negative |
| cg08763351 | 1 | 152943210 | <i>SPRR4</i>    | 2 | EGFR and pan-negative |
| cg06101324 | 1 | 152955543 | <i>SPRR1A</i>   | 2 | EGFR and pan-negative |
| cg04505023 | 1 | 152956186 | <i>SPRR1A</i>   | 2 | EGFR and pan-negative |
| cg04138756 | 1 | 152973849 | <i>SPRR3</i>    | 2 | EGFR and pan-negative |
| cg24884084 | 1 | 153003198 | <i>SPRR1B</i>   | 2 | EGFR and pan-negative |
| cg18780284 | 1 | 153004322 | <i>SPRR1B</i>   | 2 | EGFR and pan-negative |
| cg12891678 | 1 | 153015281 | <i>0</i>        | 2 | EGFR and pan-negative |
| cg18766755 | 1 | 153029939 | <i>SPRR2A</i>   | 2 | EGFR and pan-negative |
| cg26059632 | 1 | 153030751 | <i>SPRR2A</i>   | 2 | EGFR and pan-negative |
| cg08555657 | 1 | 153068231 | <i>SPRR2E</i>   | 2 | EGFR and pan-negative |
| cg00152644 | 1 | 153068236 | <i>SPRR2E</i>   | 2 | EGFR and pan-negative |
| cg17761453 | 1 | 153231562 | <i>LOR</i>      | 2 | EGFR and pan-negative |
| cg27626424 | 1 | 153232348 | <i>LOR</i>      | 2 | EGFR and pan-negative |
| cg09448880 | 1 | 153283841 | <i>PGLYRP3</i>  | 2 | EGFR and pan-negative |
| cg03165378 | 1 | 153329882 | <i>S100A9</i>   | 2 | EGFR and pan-negative |
| cg16139316 | 1 | 153330758 | <i>S100A9</i>   | 2 | EGFR and pan-negative |
| cg02813121 | 1 | 153348911 | <i>S100A12</i>  | 2 | EGFR and pan-negative |
| cg20070090 | 1 | 153363489 | <i>S100A8</i>   | 2 | EGFR and pan-negative |
| cg24898863 | 1 | 153363580 | <i>S100A8</i>   | 2 | EGFR and pan-negative |
| cg08823182 | 1 | 153514482 | <i>S100A5</i>   | 2 | EGFR and pan-negative |
| cg07426848 | 1 | 153521712 | <i>S100A3</i>   | 2 | EGFR and pan-negative |
| cg23851011 | 1 | 153585915 | <i>S100A16</i>  | 2 | EGFR and pan-negative |
| cg25433648 | 1 | 153588782 | <i>S100A14</i>  | 2 | EGFR and pan-negative |
| cg20847746 | 1 | 153600865 | <i>S100A1</i>   | 2 | EGFR and pan-negative |
| cg14188111 | 1 | 153608034 | <i>S100A13</i>  | 2 | EGFR and pan-negative |
| cg07576541 | 1 | 153630883 | <i>SNAPIN</i>   | 2 | EGFR and pan-negative |
| cg21279955 | 1 | 153747551 | <i>SLC27A3</i>  | 2 | EGFR and pan-negative |
| cg01402255 | 1 | 153800699 | <i>GATAD2B</i>  | 2 | EGFR and pan-negative |
| cg20495040 | 1 | 155107961 | <i>SLC50A1</i>  | 2 | EGFR and pan-negative |
| cg24512973 | 1 | 155161784 | <i>MUC1</i>     | 2 | EGFR and pan-negative |
| cg22234962 | 1 | 155291297 | <i>RUSC1</i>    | 2 | EGFR and pan-negative |
| cg10057065 | 1 | 155292227 | <i>RUSC1</i>    | 2 | EGFR and pan-negative |
| cg22367970 | 1 | 155826954 | <i>GON4L</i>    | 2 | EGFR and pan-negative |
| cg08256691 | 1 | 155881846 | <i>RIT1</i>     | 2 | EGFR and pan-negative |
| cg09243900 | 1 | 156030844 | <i>RAB25</i>    | 2 | EGFR and pan-negative |
| cg19580810 | 1 | 156031182 | <i>RAB25</i>    | 2 | EGFR and pan-negative |
| cg15983538 | 1 | 156123411 | <i>SEMA4A</i>   | 2 | EGFR and pan-negative |
| cg04356968 | 1 | 156212005 | <i>BGLAP</i>    | 2 | EGFR and pan-negative |
| cg24042452 | 1 | 156305664 | <i>TSACC</i>    | 2 | EGFR and pan-negative |
| cg18966791 | 1 | 156399305 | <i>C1orf61</i>  | 2 | EGFR and pan-negative |
| cg17727529 | 1 | 156399685 | <i>C1orf61</i>  | 2 | EGFR and pan-negative |
| cg03218909 | 1 | 156589008 | <i>HAPLN2</i>   | 2 | EGFR and pan-negative |
| cg21838334 | 1 | 156646653 | <i>NES</i>      | 2 | EGFR and pan-negative |
| cg12356261 | 1 | 156647259 | <i>NES</i>      | 2 | EGFR and pan-negative |
| cg16728114 | 1 | 156697793 | <i>ISG20L2</i>  | 2 | EGFR and pan-negative |
| cg00746981 | 1 | 156721141 | <i>HDGF</i>     | 2 | EGFR and pan-negative |
| cg03329572 | 1 | 157523253 | <i>FCRL5</i>    | 2 | EGFR and pan-negative |
| cg08786003 | 1 | 157670710 | <i>FCRL3</i>    | 2 | EGFR and pan-negative |
| cg15761405 | 1 | 157746405 | <i>FCRL2</i>    | 2 | EGFR and pan-negative |
| cg01637734 | 1 | 157811303 | <i>CD5L</i>     | 2 | EGFR and pan-negative |
| cg11139878 | 1 | 157811790 | <i>CD5L</i>     | 2 | EGFR and pan-negative |
| cg26870566 | 1 | 157962475 | <i>KIRREL</i>   | 2 | EGFR and pan-negative |
| cg07548313 | 1 | 158259926 | <i>CD1C</i>     | 2 | EGFR and pan-negative |

|            |   |           |          |   |                       |
|------------|---|-----------|----------|---|-----------------------|
| cg15952487 | 1 | 158300733 | CD1B     | 2 | EGFR and pan-negative |
| cg04574507 | 1 | 158301038 | CD1B     | 2 | EGFR and pan-negative |
| cg09478478 | 1 | 158322845 | CD1E     | 2 | EGFR and pan-negative |
| cg12200412 | 1 | 158324331 | CD1E     | 2 | EGFR and pan-negative |
| cg22730004 | 1 | 158656718 | SPTA1    | 2 | EGFR and pan-negative |
| cg25119415 | 1 | 158799935 | MNDA     | 2 | EGFR and pan-negative |
| cg19884600 | 1 | 158901938 | PYHIN1   | 2 | EGFR and pan-negative |
| cg07463059 | 1 | 158979810 | IFI16    | 2 | EGFR and pan-negative |
| cg11003133 | 1 | 159046391 | AIM2     | 2 | EGFR and pan-negative |
| cg08654655 | 1 | 159141063 | CADM3    | 2 | EGFR and pan-negative |
| cg18552413 | 1 | 159174610 | DARC     | 2 | EGFR and pan-negative |
| cg14696870 | 1 | 159258877 | FCER1A   | 2 | EGFR and pan-negative |
| cg15700197 | 1 | 159409207 | OR10J1   | 2 | EGFR and pan-negative |
| cg25076881 | 1 | 159409836 | OR10J1   | 2 | EGFR and pan-negative |
| cg13968061 | 1 | 159557257 | APCS     | 2 | EGFR and pan-negative |
| cg26353877 | 1 | 159557886 | APCS     | 2 | EGFR and pan-negative |
| cg08474603 | 1 | 159684431 | CRP      | 2 | EGFR and pan-negative |
| cg10663017 | 1 | 159750305 | DUSP23   | 2 | EGFR and pan-negative |
| cg09451092 | 1 | 159869223 | CCDC19   | 2 | EGFR and pan-negative |
| cg19111262 | 1 | 159916126 | IGSF9    | 2 | EGFR and pan-negative |
| cg05768141 | 1 | 160039847 | KCNJ10   | 2 | EGFR and pan-negative |
| cg05101920 | 1 | 160040217 | KCNJ10   | 2 | EGFR and pan-negative |
| cg08665772 | 1 | 160051377 | KCNJ9    | 2 | EGFR and pan-negative |
| cg06517798 | 1 | 160121283 | ATP1A4   | 2 | EGFR and pan-negative |
| cg19250891 | 1 | 160121412 | ATP1A4   | 2 | EGFR and pan-negative |
| cg07566050 | 1 | 160174755 | PEA15    | 2 | EGFR and pan-negative |
| cg08247612 | 1 | 160336486 | NHLH1    | 2 | EGFR and pan-negative |
| cg10671066 | 1 | 160492861 | SLAMF6   | 2 | EGFR and pan-negative |
| cg02945019 | 1 | 160550488 | CD84     | 2 | EGFR and pan-negative |
| cg18920397 | 1 | 160765805 | LY9      | 2 | EGFR and pan-negative |
| cg06034822 | 1 | 161016081 | USF1     | 2 | EGFR and pan-negative |
| cg22585988 | 1 | 161059327 | PVRL4    | 2 | EGFR and pan-negative |
| cg00756887 | 1 | 161059654 | PVRL4    | 2 | EGFR and pan-negative |
| cg04991214 | 1 | 161089118 | NIT1     | 2 | EGFR and pan-negative |
| cg07354440 | 1 | 161168889 | ADAMTS4  | 2 | EGFR and pan-negative |
| cg04384208 | 1 | 161519396 | FCGR3A   | 2 | EGFR and pan-negative |
| cg04567009 | 1 | 161600769 | FCGR3B   | 2 | EGFR and pan-negative |
| cg26015133 | 1 | 161692247 | FCRLB    | 2 | EGFR and pan-negative |
| cg27495845 | 1 | 161693088 | FCRLB    | 2 | EGFR and pan-negative |
| cg19451466 | 1 | 162467441 | UHMK1    | 2 | EGFR and pan-negative |
| cg17496788 | 1 | 162601807 | DDR2     | 2 | EGFR and pan-negative |
| cg07686479 | 1 | 165325030 | LMX1A    | 2 | EGFR and pan-negative |
| cg10364513 | 1 | 165414379 | RXRG     | 2 | EGFR and pan-negative |
| cg08623787 | 1 | 165414611 | RXRG     | 2 | EGFR and pan-negative |
| cg06665322 | 1 | 167059365 | GPA33    | 2 | EGFR and pan-negative |
| cg18596794 | 1 | 167689891 | MPZL1    | 2 | EGFR and pan-negative |
| cg12286890 | 1 | 168513067 | XCL2     | 2 | EGFR and pan-negative |
| cg04616963 | 1 | 168545592 | XCL1     | 2 | EGFR and pan-negative |
| cg16959606 | 1 | 169074934 | ATP1B1   | 2 | EGFR and pan-negative |
| cg13958426 | 1 | 169396637 | CCDC181  | 2 | EGFR and pan-negative |
| cg10730174 | 1 | 170633559 | PRRX1    | 2 | EGFR and pan-negative |
| cg23391785 | 1 | 171810972 | DNM3     | 2 | EGFR and pan-negative |
| cg15883716 | 1 | 173638701 | ANKRD45  | 2 | EGFR and pan-negative |
| cg04446579 | 1 | 173639071 | ANKRD45  | 2 | EGFR and pan-negative |
| cg10331038 | 1 | 175376028 | TNR      | 2 | EGFR and pan-negative |
| cg10994126 | 1 | 176432498 | PAPPA2   | 2 | EGFR and pan-negative |
| cg14659404 | 1 | 177134019 | ASTN1    | 2 | EGFR and pan-negative |
| cg23492043 | 1 | 177134266 | ASTN1    | 2 | EGFR and pan-negative |
| cg13843613 | 1 | 177140126 | FAM5B    | 2 | EGFR and pan-negative |
| cg13589108 | 1 | 177140680 | FAM5B    | 2 | EGFR and pan-negative |
| cg25461905 | 1 | 178481807 | TEX35    | 2 | EGFR and pan-negative |
| cg07044282 | 1 | 178840137 | ANGPTL1  | 2 | EGFR and pan-negative |
| cg12277666 | 1 | 179560870 | TDRD5    | 2 | EGFR and pan-negative |
| cg05421688 | 1 | 179711859 | FAM163A  | 2 | EGFR and pan-negative |
| cg01040850 | 1 | 181002669 | MR1      | 2 | EGFR and pan-negative |
| cg15756091 | 1 | 182419655 | RGS1     | 2 | EGFR and pan-negative |
| cg00208830 | 1 | 183154778 | LAMC2    | 2 | EGFR and pan-negative |
| cg20579480 | 1 | 183622007 | APOBEC4  | 2 | EGFR and pan-negative |
| cg14313310 | 1 | 184006816 | COLGALT2 | 2 | EGFR and pan-negative |
| cg05135156 | 1 | 184355420 | C1orf21  | 2 | EGFR and pan-negative |
| cg25182523 | 1 | 184944288 | FAM129A  | 2 | EGFR and pan-negative |
| cg00816620 | 1 | 185127501 | SWT1     | 2 | EGFR and pan-negative |
| cg10951619 | 1 | 190447232 | FAM5C    | 2 | EGFR and pan-negative |
| cg24133080 | 1 | 192128253 | RGS18    | 2 | EGFR and pan-negative |
| cg16608652 | 1 | 193155390 | B3GALT2  | 2 | EGFR and pan-negative |
| cg00725635 | 1 | 193155806 | B3GALT2  | 2 | EGFR and pan-negative |
| cg07845390 | 1 | 196577709 | KCNT2    | 2 | EGFR and pan-negative |
| cg04614339 | 1 | 196743672 | CFHR3    | 2 | EGFR and pan-negative |
| cg25840094 | 1 | 196945530 | CFHR5    | 2 | EGFR and pan-negative |
| cg00321478 | 1 | 197238398 | CRB1     | 2 | EGFR and pan-negative |
| cg17918239 | 1 | 200379718 | ZNF281   | 2 | EGFR and pan-negative |
| cg23915111 | 1 | 200589553 | KIF14    | 2 | EGFR and pan-negative |
| cg21870884 | 1 | 200842429 | GPR25    | 2 | EGFR and pan-negative |
| cg17983307 | 1 | 201181402 | IGFN1    | 2 | EGFR and pan-negative |
| cg05666713 | 1 | 201181883 | IGFN1    | 2 | EGFR and pan-negative |
| cg19570545 | 1 | 201252472 | PKP1     | 2 | EGFR and pan-negative |
| cg09009380 | 1 | 201252974 | PKP1     | 2 | EGFR and pan-negative |
| cg18692273 | 1 | 201347483 | TNNT2    | 2 | EGFR and pan-negative |
| cg25947945 | 1 | 201368946 | LAD1     | 2 | EGFR and pan-negative |
| cg11688469 | 1 | 201391061 | TNNI1    | 2 | EGFR and pan-negative |
| cg14920846 | 1 | 201618209 | NAV1     | 2 | EGFR and pan-negative |
| cg12970084 | 1 | 201977080 | 0        | 2 | EGFR and pan-negative |
| cg23578193 | 1 | 202163189 | LGR6     | 2 | EGFR and pan-negative |
| cg22594309 | 1 | 202679504 | SYT2     | 2 | EGFR and pan-negative |
| cg01194444 | 1 | 203054722 | MYOG     | 2 | EGFR and pan-negative |

|            |   |           |           |   |                       |
|------------|---|-----------|-----------|---|-----------------------|
| cg23609672 | 1 | 203144862 | MYBPH     | 2 | EGFR and pan-negative |
| cg18959422 | 1 | 203145364 | MYBPH     | 2 | EGFR and pan-negative |
| cg17725472 | 1 | 203198757 | CHIT1     | 2 | EGFR and pan-negative |
| cg17703324 | 1 | 203462465 | OPTC      | 2 | EGFR and pan-negative |
| cg05657520 | 1 | 203462521 | OPTC      | 2 | EGFR and pan-negative |
| cg12022621 | 1 | 203734505 | LAX1      | 2 | EGFR and pan-negative |
| cg04498511 | 1 | 203768441 | ZBED6     | 2 | EGFR and pan-negative |
| cg04902405 | 1 | 203768517 | ZBED6     | 2 | EGFR and pan-negative |
| cg20867633 | 1 | 204183116 | GOLT1A    | 2 | EGFR and pan-negative |
| cg24798047 | 1 | 204183655 | GOLT1A    | 2 | EGFR and pan-negative |
| cg10507231 | 1 | 204459638 | PIK3C2B   | 2 | EGFR and pan-negative |
| cg04698187 | 1 | 204654145 | LRRN2     | 2 | EGFR and pan-negative |
| cg05369166 | 1 | 204797507 | NFASC     | 2 | EGFR and pan-negative |
| cg22571530 | 1 | 204797929 | NFASC     | 2 | EGFR and pan-negative |
| cg03732545 | 1 | 205012130 | CNTN2     | 2 | EGFR and pan-negative |
| cg17860158 | 1 | 205012569 | CNTN2     | 2 | EGFR and pan-negative |
| cg14159672 | 1 | 205819179 | PM20D1    | 2 | EGFR and pan-negative |
| cg14893161 | 1 | 205819251 | PM20D1    | 2 | EGFR and pan-negative |
| cg21478437 | 1 | 206317403 | CTSE      | 2 | EGFR and pan-negative |
| cg22577136 | 1 | 206644165 | IKBKE     | 2 | EGFR and pan-negative |
| cg17558126 | 1 | 206680250 | RASSF5    | 2 | EGFR and pan-negative |
| cg10167296 | 1 | 206680628 | RASSF5    | 2 | EGFR and pan-negative |
| cg02589695 | 1 | 206730999 | RASSF5    | 2 | EGFR and pan-negative |
| cg09328024 | 1 | 206808174 | DYRK3     | 2 | EGFR and pan-negative |
| cg17067005 | 1 | 206945346 | IL10      | 2 | EGFR and pan-negative |
| cg01103730 | 1 | 207038704 | IL20      | 2 | EGFR and pan-negative |
| cg23909633 | 1 | 207070539 | IL24      | 2 | EGFR and pan-negative |
| cg06640279 | 1 | 207095153 | FAIM3     | 2 | EGFR and pan-negative |
| cg17460386 | 1 | 207095668 | FAIM3     | 2 | EGFR and pan-negative |
| cg01119135 | 1 | 207205525 | C1orf116  | 2 | EGFR and pan-negative |
| cg15485859 | 1 | 207206447 | C1orf116  | 2 | EGFR and pan-negative |
| cg05508558 | 1 | 207627372 | CR2       | 2 | EGFR and pan-negative |
| cg14726637 | 1 | 207669308 | CR1       | 2 | EGFR and pan-negative |
| cg05825950 | 1 | 207669576 | CR1       | 2 | EGFR and pan-negative |
| cg19591881 | 1 | 208084640 | CD34      | 2 | EGFR and pan-negative |
| cg27337148 | 1 | 209756976 | CAMK1G    | 2 | EGFR and pan-negative |
| cg03977657 | 1 | 209825747 | LAMB3     | 2 | EGFR and pan-negative |
| cg01580568 | 1 | 209825856 | LAMB3     | 2 | EGFR and pan-negative |
| cg05959508 | 1 | 209929512 | TRAF3IP3  | 2 | EGFR and pan-negative |
| cg23166289 | 1 | 210001082 | DIEXF     | 2 | EGFR and pan-negative |
| cg22197787 | 1 | 211306986 | KCNH1     | 2 | EGFR and pan-negative |
| cg23909343 | 1 | 212457915 | PPP2R5A   | 2 | EGFR and pan-negative |
| cg23534142 | 1 | 212739113 | ATF3      | 2 | EGFR and pan-negative |
| cg06150468 | 1 | 212874085 | BATF3     | 2 | EGFR and pan-negative |
| cg14576824 | 1 | 213224402 | RPS6KC1   | 2 | EGFR and pan-negative |
| cg14019317 | 1 | 214161306 | PROX1     | 2 | EGFR and pan-negative |
| cg16608348 | 1 | 214724481 | PTPN14    | 2 | EGFR and pan-negative |
| cg15590780 | 1 | 216596639 | USH2A     | 2 | EGFR and pan-negative |
| cg03750606 | 1 | 217262978 | ESRRG     | 2 | EGFR and pan-negative |
| cg13530946 | 1 | 220266799 | IARS2     | 2 | EGFR and pan-negative |
| cg01471713 | 1 | 220864279 | C1orf115  | 2 | EGFR and pan-negative |
| cg13170032 | 1 | 221052143 | HLX       | 2 | EGFR and pan-negative |
| cg20582779 | 1 | 222721375 | HHIPL2    | 2 | EGFR and pan-negative |
| cg22827524 | 1 | 222910746 | FAM177B   | 2 | EGFR and pan-negative |
| cg10942056 | 1 | 223101848 | DISP1     | 2 | EGFR and pan-negative |
| cg14972271 | 1 | 223899736 | CAPN2     | 2 | EGFR and pan-negative |
| cg01566170 | 1 | 223899746 | CAPN2     | 2 | EGFR and pan-negative |
| cg00290506 | 1 | 224804226 | CNIH3     | 2 | EGFR and pan-negative |
| cg10774440 | 1 | 226076153 | LEFTY1    | 2 | EGFR and pan-negative |
| cg12319004 | 1 | 226078237 | LEFTY1    | 2 | EGFR and pan-negative |
| cg20661303 | 1 | 226129561 | LEFTY2    | 2 | EGFR and pan-negative |
| cg16340268 | 1 | 226925172 | ITPKB     | 2 | EGFR and pan-negative |
| cg11520395 | 1 | 227924115 | JMJD4     | 2 | EGFR and pan-negative |
| cg20342082 | 1 | 228003402 | PRSS38    | 2 | EGFR and pan-negative |
| cg06312477 | 1 | 228003900 | PRSS38    | 2 | EGFR and pan-negative |
| cg01322134 | 1 | 228194448 | WNT3A     | 2 | EGFR and pan-negative |
| cg01313514 | 1 | 228194916 | WNT3A     | 2 | EGFR and pan-negative |
| cg20848130 | 1 | 228337776 | GJC2      | 2 | EGFR and pan-negative |
| cg27363486 | 1 | 228603645 | TRIM17    | 2 | EGFR and pan-negative |
| cg14541950 | 1 | 228645704 | HIST3H2BB | 2 | EGFR and pan-negative |
| cg00143998 | 1 | 228645859 | HIST3H2BB | 2 | EGFR and pan-negative |
| cg14743462 | 1 | 228646946 | HIST3H2A  | 2 | EGFR and pan-negative |
| cg13547644 | 1 | 229569608 | ACTA1     | 2 | EGFR and pan-negative |
| cg20025656 | 1 | 229570230 | ACTA1     | 2 | EGFR and pan-negative |
| cg15589354 | 1 | 229760606 | TAF5L     | 2 | EGFR and pan-negative |
| cg01671575 | 1 | 230513566 | PGBD5     | 2 | EGFR and pan-negative |
| cg19125606 | 1 | 230850299 | AGT       | 2 | EGFR and pan-negative |
| cg03017653 | 1 | 231115871 | ARV1      | 2 | EGFR and pan-negative |
| cg16516400 | 1 | 231177201 | FAM89A    | 2 | EGFR and pan-negative |
| cg18979762 | 1 | 231560395 | EGLN1     | 2 | EGFR and pan-negative |
| cg14249872 | 1 | 233749672 | KCNK1     | 2 | EGFR and pan-negative |
| cg25437385 | 1 | 234040833 | SLC35F3   | 2 | EGFR and pan-negative |
| cg09649610 | 1 | 235814039 | GNG4      | 2 | EGFR and pan-negative |
| cg02780849 | 1 | 235814163 | GNG4      | 2 | EGFR and pan-negative |
| cg26534508 | 1 | 236306311 | GPR137B   | 2 | EGFR and pan-negative |
| cg09809672 | 1 | 236557682 | EDARADD   | 2 | EGFR and pan-negative |
| cg16853982 | 1 | 236849389 | ACTN2     | 2 | EGFR and pan-negative |
| cg03872376 | 1 | 238053828 | ZP4       | 2 | EGFR and pan-negative |
| cg03673470 | 1 | 238055429 | ZP4       | 2 | EGFR and pan-negative |
| cg15602809 | 1 | 239792464 | CHRM3     | 2 | EGFR and pan-negative |
| cg24800810 | 1 | 241520926 | RGS7      | 2 | EGFR and pan-negative |
| cg18087514 | 1 | 241696246 | KMO       | 2 | EGFR and pan-negative |
| cg01664666 | 1 | 242687465 | PLD5      | 2 | EGFR and pan-negative |
| cg12613383 | 1 | 242688681 | PLD5      | 2 | EGFR and pan-negative |
| cg11314684 | 1 | 244006288 | AKT3      | 2 | EGFR and pan-negative |

|            |   |           |               |   |                       |
|------------|---|-----------|---------------|---|-----------------------|
| cg22637834 | 1 | 244007281 | AKT3          | 2 | EGFR and pan-negative |
| cg23829949 | 1 | 244214679 | ZBTB18        | 2 | EGFR and pan-negative |
| cg14460735 | 1 | 246728727 | TFB2M         | 2 | EGFR and pan-negative |
| cg01605517 | 1 | 247081873 | AHCTF1        | 2 | EGFR and pan-negative |
| cg23695504 | 1 | 247275344 | C1orf229      | 2 | EGFR and pan-negative |
| cg21991396 | 1 | 247581417 | NLRP3         | 2 | EGFR and pan-negative |
| cg13397379 | 1 | 247696628 | OR2C3         | 2 | EGFR and pan-negative |
| cg18908499 | 1 | 247712237 | GCSAML        | 2 | EGFR and pan-negative |
| cg05767404 | 1 | 247712591 | GCSAML        | 2 | EGFR and pan-negative |
| cg27341860 | 1 | 248099880 | OR2L13        | 2 | EGFR and pan-negative |
| cg20507276 | 1 | 248100600 | OR2L13        | 2 | EGFR and pan-negative |
| cg16016036 | 2 | 1417109   | TPO           | 2 | EGFR and pan-negative |
| cg10370591 | 2 | 1417431   | TPO           | 2 | EGFR and pan-negative |
| cg12164282 | 2 | 1748112   | PXDN          | 2 | EGFR and pan-negative |
| cg14037665 | 2 | 1748617   | PXDN          | 2 | EGFR and pan-negative |
| cg18105675 | 2 | 3642400   | COLEC11       | 2 | EGFR and pan-negative |
| cg26615126 | 2 | 3642867   | COLEC11       | 2 | EGFR and pan-negative |
| cg20008332 | 2 | 5833169   | SOX11         | 2 | EGFR and pan-negative |
| cg09781594 | 2 | 8469388   | LINC00299     | 2 | EGFR and pan-negative |
| cg03077836 | 2 | 9347292   | ASAP2         | 2 | EGFR and pan-negative |
| cg02983451 | 2 | 10183013  | KLF11         | 2 | EGFR and pan-negative |
| cg18623836 | 2 | 10261907  | RRM2          | 2 | EGFR and pan-negative |
| cg03402876 | 2 | 11051991  | KCNF1         | 2 | EGFR and pan-negative |
| cg22085335 | 2 | 11052081  | KCNF1         | 2 | EGFR and pan-negative |
| cg10334385 | 2 | 11272868  | C2orf50       | 2 | EGFR and pan-negative |
| cg10612997 | 2 | 11673928  | GREB1         | 2 | EGFR and pan-negative |
| cg10849854 | 2 | 11674557  | GREB1         | 2 | EGFR and pan-negative |
| cg09863772 | 2 | 11886400  | LPIN1         | 2 | EGFR and pan-negative |
| cg14789259 | 2 | 14773457  | FAM84A        | 2 | EGFR and pan-negative |
| cg17430393 | 2 | 17722068  | VSNL1         | 2 | EGFR and pan-negative |
| cg06509239 | 2 | 19558569  | OSR1          | 2 | EGFR and pan-negative |
| cg24297976 | 2 | 20189487  | WDR35         | 2 | EGFR and pan-negative |
| cg21177096 | 2 | 20212440  | MATN3         | 2 | EGFR and pan-negative |
| cg00261781 | 2 | 20212517  | MATN3         | 2 | EGFR and pan-negative |
| cg01888166 | 2 | 20527635  | PUM2          | 2 | EGFR and pan-negative |
| cg08659707 | 2 | 20527677  | PUM2          | 2 | EGFR and pan-negative |
| cg23065097 | 2 | 24271827  | FKBP1B        | 2 | EGFR and pan-negative |
| cg13401339 | 2 | 24272928  | FKBP1B        | 2 | EGFR and pan-negative |
| cg08965143 | 2 | 24308246  | TP53I3        | 2 | EGFR and pan-negative |
| cg17644208 | 2 | 25142391  | ADCY3         | 2 | EGFR and pan-negative |
| cg10883621 | 2 | 26624604  | DRC1          | 2 | EGFR and pan-negative |
| cg04726446 | 2 | 26624865  | DRC1          | 2 | EGFR and pan-negative |
| cg26900154 | 2 | 26781731  | OTOF          | 2 | EGFR and pan-negative |
| cg01643580 | 2 | 26916399  | KCNK3         | 2 | EGFR and pan-negative |
| cg26195812 | 2 | 27071332  | DPYSL5        | 2 | EGFR and pan-negative |
| cg15895197 | 2 | 27301490  | EMILIN1       | 2 | EGFR and pan-negative |
| cg20516209 | 2 | 27301943  | EMILIN1       | 2 | EGFR and pan-negative |
| cg22740783 | 2 | 27341458  | CGREF1        | 2 | EGFR and pan-negative |
| cg01620785 | 2 | 27436111  | ATRAID        | 2 | EGFR and pan-negative |
| cg09947274 | 2 | 27439915  | CAD           | 2 | EGFR and pan-negative |
| cg03875195 | 2 | 27486363  | SLC30A3       | 2 | EGFR and pan-negative |
| cg25218351 | 2 | 27505446  | TRIM54        | 2 | EGFR and pan-negative |
| cg22575540 | 2 | 27505625  | TRIM54        | 2 | EGFR and pan-negative |
| cg14948822 | 2 | 27545006  | MPV17         | 2 | EGFR and pan-negative |
| cg11177693 | 2 | 27604063  | ZNF513        | 2 | EGFR and pan-negative |
| cg23591853 | 2 | 27712996  | IFT172        | 2 | EGFR and pan-negative |
| cg16276199 | 2 | 28974102  | PPP1CB        | 2 | EGFR and pan-negative |
| cg04786857 | 2 | 29033897  | SPDYA         | 2 | EGFR and pan-negative |
| cg21972382 | 2 | 29339076  | CLIP4         | 2 | EGFR and pan-negative |
| cg18277754 | 2 | 30144152  | ALK           | 2 | EGFR and pan-negative |
| cg16862361 | 2 | 31637622  | XDH           | 2 | EGFR and pan-negative |
| cg15403517 | 2 | 31806275  | SRD5A2        | 2 | EGFR and pan-negative |
| cg25900806 | 2 | 33953779  | MYADML        | 2 | EGFR and pan-negative |
| cg21553524 | 2 | 39893185  | TMEM178A      | 2 | EGFR and pan-negative |
| cg10807560 | 2 | 40656665  | SLC8A1        | 2 | EGFR and pan-negative |
| cg08453096 | 2 | 44065893  | ABCG5         | 2 | EGFR and pan-negative |
| cg03902905 | 2 | 44502262  | SLC3A1        | 2 | EGFR and pan-negative |
| cg02192965 | 2 | 44502740  | SLC3A1        | 2 | EGFR and pan-negative |
| cg13163729 | 2 | 45169447  | SIX3          | 2 | EGFR and pan-negative |
| cg03310469 | 2 | 45236672  | SIX2          | 2 | EGFR and pan-negative |
| cg26251101 | 2 | 46768944  | RHOQ          | 2 | EGFR and pan-negative |
| cg20449833 | 2 | 46770299  | RHOQ          | 2 | EGFR and pan-negative |
| cg27138584 | 2 | 47796781  | KCNK12        | 2 | EGFR and pan-negative |
| cg01450842 | 2 | 48796213  | STON1-GTF2A1L | 2 | EGFR and pan-negative |
| cg25061755 | 2 | 48808114  | STON1-GTF2A1L | 2 | EGFR and pan-negative |
| cg12351433 | 2 | 48982957  | LHCGR         | 2 | EGFR and pan-negative |
| cg10917619 | 2 | 51255627  | NRXN1         | 2 | EGFR and pan-negative |
| cg14832904 | 2 | 54087028  | GPR75         | 2 | EGFR and pan-negative |
| cg19664945 | 2 | 54087343  | GPR75         | 2 | EGFR and pan-negative |
| cg23192899 | 2 | 55746287  | CCDC104       | 2 | EGFR and pan-negative |
| cg25711779 | 2 | 56149825  | EFEMP1        | 2 | EGFR and pan-negative |
| cg20786074 | 2 | 56150255  | EFEMP1        | 2 | EGFR and pan-negative |
| cg05253327 | 2 | 62420915  | O             | 2 | EGFR and pan-negative |
| cg26260350 | 2 | 63277932  | OTX1          | 2 | EGFR and pan-negative |
| cg22521310 | 2 | 64881850  | SERTAD2       | 2 | EGFR and pan-negative |
| cg07080358 | 2 | 68546507  | CNRIP1        | 2 | EGFR and pan-negative |
| cg10908369 | 2 | 68547256  | CNRIP1        | 2 | EGFR and pan-negative |
| cg24626923 | 2 | 68873205  | PROKR1        | 2 | EGFR and pan-negative |
| cg11308639 | 2 | 69098272  | BMP10         | 2 | EGFR and pan-negative |
| cg13877895 | 2 | 69201009  | GKN1          | 2 | EGFR and pan-negative |
| cg11078738 | 2 | 69240453  | ANTXR1        | 2 | EGFR and pan-negative |
| cg04801003 | 2 | 69240754  | ANTXR1        | 2 | EGFR and pan-negative |
| cg22792910 | 2 | 70009351  | ANXA4         | 2 | EGFR and pan-negative |
| cg01639256 | 2 | 70189903  | ASPRV1        | 2 | EGFR and pan-negative |
| cg11808874 | 2 | 70529494  | FAM136A       | 2 | EGFR and pan-negative |

|            |   |           |           |   |                       |
|------------|---|-----------|-----------|---|-----------------------|
| cg08132931 | 2 | 70994962  | ADD2      | 2 | EGFR and pan-negative |
| cg25631352 | 2 | 70995527  | ADD2      | 2 | EGFR and pan-negative |
| cg18199266 | 2 | 71048136  | CLEC4F    | 2 | EGFR and pan-negative |
| cg20699736 | 2 | 71127226  | VAX2      | 2 | EGFR and pan-negative |
| cg07052880 | 2 | 71161697  | ATP6V1B1  | 2 | EGFR and pan-negative |
| cg04884908 | 2 | 72374840  | CYP26B1   | 2 | EGFR and pan-negative |
| cg21351994 | 2 | 73145006  | EMX1      | 2 | EGFR and pan-negative |
| cg08116137 | 2 | 73870653  | NAT8      | 2 | EGFR and pan-negative |
| cg23173910 | 2 | 74120274  | ACTG2     | 2 | EGFR and pan-negative |
| cg06391660 | 2 | 74608183  | DCTN1     | 2 | EGFR and pan-negative |
| cg25361106 | 2 | 74740746  | TLX2      | 2 | EGFR and pan-negative |
| cg26033710 | 2 | 75426249  | TACR1     | 2 | EGFR and pan-negative |
| cg02111587 | 2 | 75426512  | TACR1     | 2 | EGFR and pan-negative |
| cg16204289 | 2 | 75796759  | EVA1A     | 2 | EGFR and pan-negative |
| cg01044662 | 2 | 75938360  | GCFC2     | 2 | EGFR and pan-negative |
| cg00627233 | 2 | 79251911  | REG3G     | 2 | EGFR and pan-negative |
| cg00918005 | 2 | 79253210  | REG3G     | 2 | EGFR and pan-negative |
| cg07841014 | 2 | 79314745  | REG1B     | 2 | EGFR and pan-negative |
| cg23111544 | 2 | 79347474  | REG1A     | 2 | EGFR and pan-negative |
| cg05828624 | 2 | 79347699  | REG1A     | 2 | EGFR and pan-negative |
| cg16158220 | 2 | 79383891  | 0         | 2 | EGFR and pan-negative |
| cg08107272 | 2 | 79739942  | CTNNA2    | 2 | EGFR and pan-negative |
| cg23699324 | 2 | 79740308  | CTNNA2    | 2 | EGFR and pan-negative |
| cg21621248 | 2 | 80531842  | LRRTM1    | 2 | EGFR and pan-negative |
| cg00465284 | 2 | 80531898  | LRRTM1    | 2 | EGFR and pan-negative |
| cg16324018 | 2 | 85580627  | RETSAT    | 2 | EGFR and pan-negative |
| cg05656364 | 2 | 85804732  | VAMP8     | 2 | EGFR and pan-negative |
| cg26394380 | 2 | 85896001  | SFTPB     | 2 | EGFR and pan-negative |
| cg25066857 | 2 | 85921438  | GNLY      | 2 | EGFR and pan-negative |
| cg02870945 | 2 | 86565124  | REEP1     | 2 | EGFR and pan-negative |
| cg02972551 | 2 | 86668068  | KDM3A     | 2 | EGFR and pan-negative |
| cg17108819 | 2 | 87017953  | CD8A      | 2 | EGFR and pan-negative |
| cg26850754 | 2 | 87088796  | ANAPC1P1  | 2 | EGFR and pan-negative |
| cg14003512 | 2 | 88047546  | PLGLB2    | 2 | EGFR and pan-negative |
| cg24977027 | 2 | 88469347  | THNSL2    | 2 | EGFR and pan-negative |
| cg15903395 | 2 | 88824153  | TEX37     | 2 | EGFR and pan-negative |
| cg12811135 | 2 | 88824472  | TEX37     | 2 | EGFR and pan-negative |
| cg23984130 | 2 | 89215185  | 0         | 2 | EGFR and pan-negative |
| cg22262964 | 2 | 89629580  | 0         | 2 | EGFR and pan-negative |
| cg13279585 | 2 | 89630389  | 0         | 2 | EGFR and pan-negative |
| cg17412560 | 2 | 95963403  | KCNIP3    | 2 | EGFR and pan-negative |
| cg05399697 | 2 | 96610206  | 0         | 2 | EGFR and pan-negative |
| cg21542793 | 2 | 96781891  | ADRA2B    | 2 | EGFR and pan-negative |
| cg01148741 | 2 | 96811453  | DUSP2     | 2 | EGFR and pan-negative |
| cg04533291 | 2 | 96930398  | TMEM127   | 2 | EGFR and pan-negative |
| cg13672342 | 2 | 96930546  | TMEM127   | 2 | EGFR and pan-negative |
| cg13140267 | 2 | 96971704  | SNRNP200  | 2 | EGFR and pan-negative |
| cg01906055 | 2 | 97000811  | NCAPH     | 2 | EGFR and pan-negative |
| cg03102516 | 2 | 97171383  | NEURL3    | 2 | EGFR and pan-negative |
| cg15703357 | 2 | 97171449  | NEURL3    | 2 | EGFR and pan-negative |
| cg05941634 | 2 | 97481230  | CNNM3     | 2 | EGFR and pan-negative |
| cg02347114 | 2 | 99871669  | LYG2      | 2 | EGFR and pan-negative |
| cg07349094 | 2 | 100759014 | AFF3      | 2 | EGFR and pan-negative |
| cg06183267 | 2 | 100759134 | AFF3      | 2 | EGFR and pan-negative |
| cg07799947 | 2 | 101436171 | NPAS2     | 2 | EGFR and pan-negative |
| cg14383135 | 2 | 101436923 | NPAS2     | 2 | EGFR and pan-negative |
| cg21388029 | 2 | 102003306 | CREG2     | 2 | EGFR and pan-negative |
| cg20387706 | 2 | 102097314 | 0         | 2 | EGFR and pan-negative |
| cg15077070 | 2 | 102803290 | IL1RL2    | 2 | EGFR and pan-negative |
| cg22797169 | 2 | 102803407 | IL1RL2    | 2 | EGFR and pan-negative |
| cg11916609 | 2 | 102927488 | IL1RL1    | 2 | EGFR and pan-negative |
| cg17869167 | 2 | 102979704 | IL18R1    | 2 | EGFR and pan-negative |
| cg18156583 | 2 | 103035227 | IL18RAP   | 2 | EGFR and pan-negative |
| cg21282997 | 2 | 103035835 | IL18RAP   | 2 | EGFR and pan-negative |
| cg04532229 | 2 | 103235411 | SLC9A2    | 2 | EGFR and pan-negative |
| cg21399079 | 2 | 105858139 | GPR45     | 2 | EGFR and pan-negative |
| cg22253945 | 2 | 105858489 | GPR45     | 2 | EGFR and pan-negative |
| cg27223827 | 2 | 106054920 | FHL2      | 2 | EGFR and pan-negative |
| cg10635061 | 2 | 106055006 | FHL2      | 2 | EGFR and pan-negative |
| cg25725843 | 2 | 107504169 | ST6GAL2   | 2 | EGFR and pan-negative |
| cg16232126 | 2 | 108603005 | SLC5A7    | 2 | EGFR and pan-negative |
| cg12433691 | 2 | 109065314 | GCC2      | 2 | EGFR and pan-negative |
| cg01124420 | 2 | 109605518 | EDAR      | 2 | EGFR and pan-negative |
| cg26309498 | 2 | 109607038 | EDAR      | 2 | EGFR and pan-negative |
| cg02148642 | 2 | 110549586 | RGPD6     | 2 | EGFR and pan-negative |
| cg18879041 | 2 | 110656797 | LIMS3L    | 2 | EGFR and pan-negative |
| cg24912023 | 2 | 110979750 | LINC00116 | 2 | EGFR and pan-negative |
| cg08023751 | 2 | 112655112 | MERTK     | 2 | EGFR and pan-negative |
| cg08861115 | 2 | 113735377 | IL36G     | 2 | EGFR and pan-negative |
| cg01507173 | 2 | 113816662 | IL36RN    | 2 | EGFR and pan-negative |
| cg25042226 | 2 | 114036571 | PAX8      | 2 | EGFR and pan-negative |
| cg08451957 | 2 | 114256406 | FOXD4L1   | 2 | EGFR and pan-negative |
| cg22699362 | 2 | 118775427 | 0         | 2 | EGFR and pan-negative |
| cg11009736 | 2 | 119699682 | MARCO     | 2 | EGFR and pan-negative |
| cg02431964 | 2 | 119700029 | MARCO     | 2 | EGFR and pan-negative |
| cg06872331 | 2 | 119981960 | STEAP3    | 2 | EGFR and pan-negative |
| cg01897036 | 2 | 120282327 | SCTR      | 2 | EGFR and pan-negative |
| cg12108912 | 2 | 120435949 | TMEM177   | 2 | EGFR and pan-negative |
| cg17099569 | 2 | 121549866 | 0         | 2 | EGFR and pan-negative |
| cg17105014 | 2 | 127413363 | GYPC      | 2 | EGFR and pan-negative |
| cg25457027 | 2 | 128175179 | PROC      | 2 | EGFR and pan-negative |
| cg26718585 | 2 | 128176454 | PROC      | 2 | EGFR and pan-negative |
| cg16944093 | 2 | 128422120 | LIMS2     | 2 | EGFR and pan-negative |
| cg01200177 | 2 | 128616082 | POLR2D    | 2 | EGFR and pan-negative |
| cg26782833 | 2 | 128642103 | AMMECR1L  | 2 | EGFR and pan-negative |

|            |   |           |                 |   |                       |
|------------|---|-----------|-----------------|---|-----------------------|
| cg12815916 | 2 | 131114432 | <i>PTPN18</i>   | 2 | EGFR and pan-negative |
| cg18905252 | 2 | 131356362 | <i>CFC1</i>     | 2 | EGFR and pan-negative |
| cg17204100 | 2 | 131357715 | <i>CFC1B</i>    | 2 | EGFR and pan-negative |
| cg25784308 | 2 | 131513216 | <i>AMER3</i>    | 2 | EGFR and pan-negative |
| cg11469778 | 2 | 131674201 | <i>ARHGEF4</i>  | 2 | EGFR and pan-negative |
| cg26216632 | 2 | 132479319 | <i>C2orf27A</i> | 2 | EGFR and pan-negative |
| cg11084611 | 2 | 132480958 | <i>C2orf27A</i> | 2 | EGFR and pan-negative |
| cg25953146 | 2 | 132558939 | <i>C2orf27B</i> | 2 | EGFR and pan-negative |
| cg08251036 | 2 | 135008923 | <i>0</i>        | 2 | EGFR and pan-negative |
| cg18766847 | 2 | 135595627 | <i>ACMSD</i>    | 2 | EGFR and pan-negative |
| cg03608167 | 2 | 136875637 | <i>CXCR4</i>    | 2 | EGFR and pan-negative |
| cg21859434 | 2 | 136876021 | <i>CXCR4</i>    | 2 | EGFR and pan-negative |
| cg02906939 | 2 | 138721315 | <i>HNMT</i>     | 2 | EGFR and pan-negative |
| cg15441973 | 2 | 138721317 | <i>HNMT</i>     | 2 | EGFR and pan-negative |
| cg02322989 | 2 | 142888598 | <i>LRP1B</i>    | 2 | EGFR and pan-negative |
| cg11134443 | 2 | 143635318 | <i>KYNU</i>     | 2 | EGFR and pan-negative |
| cg27365426 | 2 | 143886372 | <i>ARHGAP15</i> | 2 | EGFR and pan-negative |
| cg23627134 | 2 | 143886375 | <i>ARHGAP15</i> | 2 | EGFR and pan-negative |
| cg15377518 | 2 | 145278113 | <i>ZEB2</i>     | 2 | EGFR and pan-negative |
| cg08475827 | 2 | 152266230 | <i>RIF1</i>     | 2 | EGFR and pan-negative |
| cg18272264 | 2 | 152956036 | <i>CACNB4</i>   | 2 | EGFR and pan-negative |
| cg27420236 | 2 | 154334716 | <i>RPRM</i>     | 2 | EGFR and pan-negative |
| cg27460755 | 2 | 154800287 | <i>GALNT13</i>  | 2 | EGFR and pan-negative |
| cg01161611 | 2 | 154801634 | <i>GALNT13</i>  | 2 | EGFR and pan-negative |
| cg24693368 | 2 | 155554844 | <i>KCNJ3</i>    | 2 | EGFR and pan-negative |
| cg20469837 | 2 | 158114300 | <i>GALNT5</i>   | 2 | EGFR and pan-negative |
| cg24576425 | 2 | 158114404 | <i>GALNT5</i>   | 2 | EGFR and pan-negative |
| cg12177677 | 2 | 158300475 | <i>CYTIP</i>    | 2 | EGFR and pan-negative |
| cg16682903 | 2 | 158694670 | <i>ACVR1</i>    | 2 | EGFR and pan-negative |
| cg09499849 | 2 | 158695158 | <i>ACVR1</i>    | 2 | EGFR and pan-negative |
| cg03520136 | 2 | 158851300 | <i>UPP2</i>     | 2 | EGFR and pan-negative |
| cg15923513 | 2 | 160654168 | <i>CD302</i>    | 2 | EGFR and pan-negative |
| cg15352315 | 2 | 160655036 | <i>CD302</i>    | 2 | EGFR and pan-negative |
| cg21105318 | 2 | 161056520 | <i>ITGB6</i>    | 2 | EGFR and pan-negative |
| cg18437633 | 2 | 161056639 | <i>ITGB6</i>    | 2 | EGFR and pan-negative |
| cg06168324 | 2 | 161349637 | <i>RBMS1</i>    | 2 | EGFR and pan-negative |
| cg06747888 | 2 | 162271859 | <i>TBR1</i>     | 2 | EGFR and pan-negative |
| cg07354209 | 2 | 163100039 | <i>FAP</i>      | 2 | EGFR and pan-negative |
| cg19965810 | 2 | 163695793 | <i>KCNH7</i>    | 2 | EGFR and pan-negative |
| cg25668368 | 2 | 163695882 | <i>KCNH7</i>    | 2 | EGFR and pan-negative |
| cg03464655 | 2 | 165811982 | <i>SLC38A11</i> | 2 | EGFR and pan-negative |
| cg19320612 | 2 | 167168190 | <i>SCN9A</i>    | 2 | EGFR and pan-negative |
| cg25995212 | 2 | 167342984 | <i>SCN7A</i>    | 2 | EGFR and pan-negative |
| cg19723473 | 2 | 168675040 | <i>B3GALT1</i>  | 2 | EGFR and pan-negative |
| cg25427580 | 2 | 168675357 | <i>B3GALT1</i>  | 2 | EGFR and pan-negative |
| cg13605690 | 2 | 169746671 | <i>SPC25</i>    | 2 | EGFR and pan-negative |
| cg06580318 | 2 | 169747119 | <i>SPC25</i>    | 2 | EGFR and pan-negative |
| cg20118424 | 2 | 169887275 | <i>ABCB11</i>   | 2 | EGFR and pan-negative |
| cg05389024 | 2 | 170366131 | <i>KLHL41</i>   | 2 | EGFR and pan-negative |
| cg24611092 | 2 | 172778432 | <i>HAT1</i>     | 2 | EGFR and pan-negative |
| cg15236866 | 2 | 172948825 | <i>DLX1</i>     | 2 | EGFR and pan-negative |
| cg03657766 | 2 | 172967014 | <i>DLX2</i>     | 2 | EGFR and pan-negative |
| cg20795401 | 2 | 173291908 | <i>ITGA6</i>    | 2 | EGFR and pan-negative |
| cg14114267 | 2 | 174831503 | <i>SP3</i>      | 2 | EGFR and pan-negative |
| cg10037068 | 2 | 175500072 | <i>WIPF1</i>    | 2 | EGFR and pan-negative |
| cg22925639 | 2 | 175628739 | <i>CHRNA1</i>   | 2 | EGFR and pan-negative |
| cg05649009 | 2 | 175629850 | <i>CHRNA1</i>   | 2 | EGFR and pan-negative |
| cg18440474 | 2 | 175869653 | <i>CHN1</i>     | 2 | EGFR and pan-negative |
| cg19713083 | 2 | 176046495 | <i>ATP5G3</i>   | 2 | EGFR and pan-negative |
| cg19325985 | 2 | 176956761 | <i>HOXD13</i>   | 2 | EGFR and pan-negative |
| cg08806153 | 2 | 176971961 | <i>HOXD11</i>   | 2 | EGFR and pan-negative |
| cg16632715 | 2 | 176972113 | <i>HOXD11</i>   | 2 | EGFR and pan-negative |
| cg14399060 | 2 | 177015070 | <i>MIR10B</i>   | 2 | EGFR and pan-negative |
| cg18702197 | 2 | 177027641 | <i>HOXD3</i>    | 2 | EGFR and pan-negative |
| cg19001226 | 2 | 177053345 | <i>HOXD1</i>    | 2 | EGFR and pan-negative |
| cg03283842 | 2 | 179343803 | <i>FKBP7</i>    | 2 | EGFR and pan-negative |
| cg00949554 | 2 | 181845489 | <i>UBE2E3</i>   | 2 | EGFR and pan-negative |
| cg20415809 | 2 | 182321855 | <i>ITGA4</i>    | 2 | EGFR and pan-negative |
| cg02836529 | 2 | 182544413 | <i>NEUROD1</i>  | 2 | EGFR and pan-negative |
| cg20308679 | 2 | 183731407 | <i>FRZB</i>     | 2 | EGFR and pan-negative |
| cg19568591 | 2 | 183731599 | <i>FRZB</i>     | 2 | EGFR and pan-negative |
| cg07823935 | 2 | 183902842 | <i>NCKAP1</i>   | 2 | EGFR and pan-negative |
| cg13121699 | 2 | 185462397 | <i>ZNF804A</i>  | 2 | EGFR and pan-negative |
| cg00554682 | 2 | 185463132 | <i>ZNF804A</i>  | 2 | EGFR and pan-negative |
| cg21350115 | 2 | 188312833 | <i>CALCRL</i>   | 2 | EGFR and pan-negative |
| cg13274254 | 2 | 189157566 | <i>GULP1</i>    | 2 | EGFR and pan-negative |
| cg11692477 | 2 | 190445477 | <i>SLC40A1</i>  | 2 | EGFR and pan-negative |
| cg11483915 | 2 | 190446080 | <i>SLC40A1</i>  | 2 | EGFR and pan-negative |
| cg11778001 | 2 | 191512851 | <i>NAB1</i>     | 2 | EGFR and pan-negative |
| cg20195812 | 2 | 192015677 | <i>STAT4</i>    | 2 | EGFR and pan-negative |
| cg24331079 | 2 | 192016205 | <i>STAT4</i>    | 2 | EGFR and pan-negative |
| cg18221862 | 2 | 193059230 | <i>TMEFF2</i>   | 2 | EGFR and pan-negative |
| cg06856528 | 2 | 193059405 | <i>TMEFF2</i>   | 2 | EGFR and pan-negative |
| cg02358761 | 2 | 197036780 | <i>STK17B</i>   | 2 | EGFR and pan-negative |
| cg15944856 | 2 | 197676146 | <i>C2orf66</i>  | 2 | EGFR and pan-negative |
| cg09096031 | 2 | 198540569 | <i>RFTN2</i>    | 2 | EGFR and pan-negative |
| cg08373610 | 2 | 198540621 | <i>RFTN2</i>    | 2 | EGFR and pan-negative |
| cg27609819 | 2 | 198816177 | <i>PLCL1</i>    | 2 | EGFR and pan-negative |
| cg15761233 | 2 | 200819070 | <i>C2orf47</i>  | 2 | EGFR and pan-negative |
| cg13038560 | 2 | 200819113 | <i>C2orf47</i>  | 2 | EGFR and pan-negative |
| cg22444610 | 2 | 201375087 | <i>KCTD18</i>   | 2 | EGFR and pan-negative |
| cg11388238 | 2 | 201375098 | <i>KCTD18</i>   | 2 | EGFR and pan-negative |
| cg02144933 | 2 | 201450690 | <i>AOX1</i>     | 2 | EGFR and pan-negative |
| cg12627583 | 2 | 201450731 | <i>AOX1</i>     | 2 | EGFR and pan-negative |
| cg06088314 | 2 | 201730276 | <i>CLK1</i>     | 2 | EGFR and pan-negative |

|            |   |           |           |   |                       |
|------------|---|-----------|-----------|---|-----------------------|
| cg18119407 | 2 | 201980504 | CFLAR     | 2 | EGFR and pan-negative |
| cg16745604 | 2 | 202047459 | CASP10    | 2 | EGFR and pan-negative |
| cg25095814 | 2 | 202098016 | CASP8     | 2 | EGFR and pan-negative |
| cg22898761 | 2 | 202148976 | CASP8     | 2 | EGFR and pan-negative |
| cg23410113 | 2 | 202149083 | CASP8     | 2 | EGFR and pan-negative |
| cg26986815 | 2 | 202149369 | CASP8     | 2 | EGFR and pan-negative |
| cg11052143 | 2 | 202484020 | ALS2CR11  | 2 | EGFR and pan-negative |
| cg02099418 | 2 | 204571146 | CD28      | 2 | EGFR and pan-negative |
| cg04098585 | 2 | 204571215 | CD28      | 2 | EGFR and pan-negative |
| cg08460026 | 2 | 204732474 | CTLA4     | 2 | EGFR and pan-negative |
| cg19132372 | 2 | 207079152 | GPR1      | 2 | EGFR and pan-negative |
| cg26258845 | 2 | 207308087 | ADAM23    | 2 | EGFR and pan-negative |
| cg16778809 | 2 | 207308375 | ADAM23    | 2 | EGFR and pan-negative |
| cg06194186 | 2 | 207803693 | CPO       | 2 | EGFR and pan-negative |
| cg03731898 | 2 | 207804081 | CPO       | 2 | EGFR and pan-negative |
| cg10723020 | 2 | 208393829 | CREB1     | 2 | EGFR and pan-negative |
| cg12073779 | 2 | 208989469 | CRYGD     | 2 | EGFR and pan-negative |
| cg23144899 | 2 | 208994373 | CRYGC     | 2 | EGFR and pan-negative |
| cg05619712 | 2 | 208994720 | CRYGC     | 2 | EGFR and pan-negative |
| cg00823148 | 2 | 209012295 | CRYGB     | 2 | EGFR and pan-negative |
| cg10562586 | 2 | 210444154 | MAP2      | 2 | EGFR and pan-negative |
| cg14795968 | 2 | 211089815 | ACADL     | 2 | EGFR and pan-negative |
| cg09068528 | 2 | 211090171 | ACADL     | 2 | EGFR and pan-negative |
| cg11059341 | 2 | 211179560 | MYL1      | 2 | EGFR and pan-negative |
| cg12339029 | 2 | 211179902 | MYL1      | 2 | EGFR and pan-negative |
| cg07015629 | 2 | 213403212 | ERBB4     | 2 | EGFR and pan-negative |
| cg20637307 | 2 | 213403960 | ERBB4     | 2 | EGFR and pan-negative |
| cg21803680 | 2 | 216946845 | TMEM169   | 2 | EGFR and pan-negative |
| cg15830940 | 2 | 217278069 | SMARCAL1  | 2 | EGFR and pan-negative |
| cg26187237 | 2 | 217498574 | IGFBP2    | 2 | EGFR and pan-negative |
| cg19008649 | 2 | 217560292 | IGFBP5    | 2 | EGFR and pan-negative |
| cg10376763 | 2 | 217724363 | TNP1      | 2 | EGFR and pan-negative |
| cg13980719 | 2 | 217725560 | TNP1      | 2 | EGFR and pan-negative |
| cg18328334 | 2 | 218808652 | TNS1      | 2 | EGFR and pan-negative |
| cg18752854 | 2 | 218809254 | TNS1      | 2 | EGFR and pan-negative |
| cg14150666 | 2 | 218991310 | CXCR2     | 2 | EGFR and pan-negative |
| cg13519373 | 2 | 219030898 | CXCR1     | 2 | EGFR and pan-negative |
| cg21004129 | 2 | 219032024 | CXCR1     | 2 | EGFR and pan-negative |
| cg10498097 | 2 | 219221131 | C2orf62   | 2 | EGFR and pan-negative |
| cg18854666 | 2 | 219247055 | SLC11A1   | 2 | EGFR and pan-negative |
| cg02488871 | 2 | 219288203 | VIL1      | 2 | EGFR and pan-negative |
| cg03460682 | 2 | 219646316 | CYP27A1   | 2 | EGFR and pan-negative |
| cg16256504 | 2 | 219724157 | WNT6      | 2 | EGFR and pan-negative |
| cg22156632 | 2 | 219725069 | WNT6      | 2 | EGFR and pan-negative |
| cg01920829 | 2 | 219824761 | CDK5R2    | 2 | EGFR and pan-negative |
| cg11269533 | 2 | 219850301 | FEV       | 2 | EGFR and pan-negative |
| cg24178740 | 2 | 219850465 | FEV       | 2 | EGFR and pan-negative |
| cg10775273 | 2 | 219857927 | CRYBA2    | 2 | EGFR and pan-negative |
| cg25908985 | 2 | 219925065 | IHH       | 2 | EGFR and pan-negative |
| cg17178336 | 2 | 219925246 | IHH       | 2 | EGFR and pan-negative |
| cg04587910 | 2 | 220025744 | NHEJ1     | 2 | EGFR and pan-negative |
| cg06971096 | 2 | 220173591 | PTPRN     | 2 | EGFR and pan-negative |
| cg18182399 | 2 | 220283175 | DES       | 2 | EGFR and pan-negative |
| cg19210770 | 2 | 220379091 | ASIC4     | 2 | EGFR and pan-negative |
| cg06552037 | 2 | 220435838 | OBSL1     | 2 | EGFR and pan-negative |
| cg25928444 | 2 | 220437437 | INHA      | 2 | EGFR and pan-negative |
| cg08274552 | 2 | 220491834 | SLC4A3    | 2 | EGFR and pan-negative |
| cg13496838 | 2 | 223164747 | PAX3      | 2 | EGFR and pan-negative |
| cg11300809 | 2 | 223288637 | SGPP2     | 2 | EGFR and pan-negative |
| cg24516901 | 2 | 225266801 | FAM124B   | 2 | EGFR and pan-negative |
| cg07310661 | 2 | 225449833 | CUL3      | 2 | EGFR and pan-negative |
| cg10098888 | 2 | 227665799 | 0         | 2 | EGFR and pan-negative |
| cg13406768 | 2 | 228192416 | MFF       | 2 | EGFR and pan-negative |
| cg25713185 | 2 | 228582486 | SLC19A3   | 2 | EGFR and pan-negative |
| cg09425228 | 2 | 228678005 | CCL20     | 2 | EGFR and pan-negative |
| cg21643045 | 2 | 228678693 | CCL20     | 2 | EGFR and pan-negative |
| cg14329157 | 2 | 228736135 | DAW1      | 2 | EGFR and pan-negative |
| cg07864632 | 2 | 230785697 | TRIP12    | 2 | EGFR and pan-negative |
| cg17607231 | 2 | 231090329 | SP140     | 2 | EGFR and pan-negative |
| cg05564251 | 2 | 231090640 | SP140     | 2 | EGFR and pan-negative |
| cg20287234 | 2 | 231789465 | GPR55     | 2 | EGFR and pan-negative |
| cg03386373 | 2 | 231860456 | LOC348761 | 2 | EGFR and pan-negative |
| cg06096336 | 2 | 231989800 | HTR2B     | 2 | EGFR and pan-negative |
| cg26862286 | 2 | 232330307 | NCL       | 2 | EGFR and pan-negative |
| cg05422352 | 2 | 232650747 | COPS7B    | 2 | EGFR and pan-negative |
| cg18374517 | 2 | 233271575 | ALPPL2    | 2 | EGFR and pan-negative |
| cg25431974 | 2 | 233352936 | ECEL1     | 2 | EGFR and pan-negative |
| cg23398241 | 2 | 233390712 | CHRNA1    | 2 | EGFR and pan-negative |
| cg11695684 | 2 | 233391265 | CHRNA1    | 2 | EGFR and pan-negative |
| cg20059312 | 2 | 233877857 | NGEF      | 2 | EGFR and pan-negative |
| cg19485804 | 2 | 233878714 | NGEF      | 2 | EGFR and pan-negative |
| cg24198840 | 2 | 233897561 | NEU2      | 2 | EGFR and pan-negative |
| cg15559700 | 2 | 234579873 | UGT1A9    | 2 | EGFR and pan-negative |
| cg12385643 | 2 | 234600149 | UGT1A6    | 2 | EGFR and pan-negative |
| cg23464269 | 2 | 234637667 | UGT1A3    | 2 | EGFR and pan-negative |
| cg11346450 | 2 | 234638043 | UGT1A3    | 2 | EGFR and pan-negative |
| cg11811840 | 2 | 234669166 | UGT1A1    | 2 | EGFR and pan-negative |
| cg15746445 | 2 | 234824933 | TRPM8     | 2 | EGFR and pan-negative |
| cg14061619 | 2 | 235860118 | SH3BP4    | 2 | EGFR and pan-negative |
| cg15144793 | 2 | 235861303 | SH3BP4    | 2 | EGFR and pan-negative |
| cg04856858 | 2 | 236402015 | AGAP1     | 2 | EGFR and pan-negative |
| cg06954481 | 2 | 237076497 | GBX2      | 2 | EGFR and pan-negative |
| cg03626672 | 2 | 237478664 | ACKR3     | 2 | EGFR and pan-negative |
| cg00573606 | 2 | 238322680 | COL6A3    | 2 | EGFR and pan-negative |
| cg09037813 | 2 | 238599761 | LRRFIP1   | 2 | EGFR and pan-negative |

|            |   |           |          |   |                       |
|------------|---|-----------|----------|---|-----------------------|
| cg27567335 | 2 | 238768074 | RAMP1    | 2 | EGFR and pan-negative |
| cg10832945 | 2 | 240499879 | 0        | 2 | EGFR and pan-negative |
| cg09222115 | 2 | 241079766 | OTOS     | 2 | EGFR and pan-negative |
| cg08321346 | 2 | 241496983 | ANKMY1   | 2 | EGFR and pan-negative |
| cg13097816 | 2 | 241568439 | GPR35    | 2 | EGFR and pan-negative |
| cg07432969 | 2 | 241569557 | GPR35    | 2 | EGFR and pan-negative |
| cg14662379 | 2 | 241759279 | KIF1A    | 2 | EGFR and pan-negative |
| cg21321735 | 2 | 241760164 | KIF1A    | 2 | EGFR and pan-negative |
| cg16967583 | 2 | 241807859 | AGXT     | 2 | EGFR and pan-negative |
| cg16358738 | 2 | 241808595 | AGXT     | 2 | EGFR and pan-negative |
| cg19372178 | 2 | 242126680 | ANO7     | 2 | EGFR and pan-negative |
| cg23888423 | 2 | 242254170 | 42615    | 2 | EGFR and pan-negative |
| cg21144270 | 2 | 242448675 | STK25    | 2 | EGFR and pan-negative |
| cg18096388 | 2 | 242800973 | PDCD1    | 2 | EGFR and pan-negative |
| cg16173109 | 2 | 242945447 | 0        | 2 | EGFR and pan-negative |
| cg13297249 | 2 | 242945663 | 0        | 2 | EGFR and pan-negative |
| cg00903242 | 3 | 238161    | CHL1     | 2 | EGFR and pan-negative |
| cg07664856 | 3 | 1134528   | CNTN6    | 2 | EGFR and pan-negative |
| cg05209917 | 3 | 1134730   | CNTN6    | 2 | EGFR and pan-negative |
| cg11563860 | 3 | 2141937   | CNTN4    | 2 | EGFR and pan-negative |
| cg01892727 | 3 | 3221728   | CRBN     | 2 | EGFR and pan-negative |
| cg04527363 | 3 | 6902337   | GRM7     | 2 | EGFR and pan-negative |
| cg02100848 | 3 | 8693859   | SSUH2    | 2 | EGFR and pan-negative |
| cg16191009 | 3 | 9745369   | CPNE9    | 2 | EGFR and pan-negative |
| cg25415932 | 3 | 9791051   | OGG1     | 2 | EGFR and pan-negative |
| cg27345946 | 3 | 9835511   | ARPC4    | 2 | EGFR and pan-negative |
| cg03375833 | 3 | 9859360   | TLL3     | 2 | EGFR and pan-negative |
| cg05684195 | 3 | 9920572   | CIDEC    | 2 | EGFR and pan-negative |
| cg07832674 | 3 | 9943884   | IL17RE   | 2 | EGFR and pan-negative |
| cg15095327 | 3 | 9944512   | IL17RE   | 2 | EGFR and pan-negative |
| cg07705835 | 3 | 9959128   | IL17RC   | 2 | EGFR and pan-negative |
| cg13560548 | 3 | 10150139  | FANCD2OS | 2 | EGFR and pan-negative |
| cg24092914 | 3 | 10184877  | VHL      | 2 | EGFR and pan-negative |
| cg15284635 | 3 | 10858504  | SLC6A11  | 2 | EGFR and pan-negative |
| cg11021744 | 3 | 11034279  | SLC6A1   | 2 | EGFR and pan-negative |
| cg14837082 | 3 | 11294604  | HRH1     | 2 | EGFR and pan-negative |
| cg15873301 | 3 | 12045459  | SYN2     | 2 | EGFR and pan-negative |
| cg04172348 | 3 | 12046004  | SYN2     | 2 | EGFR and pan-negative |
| cg25982743 | 3 | 12200236  | TIMP4    | 2 | EGFR and pan-negative |
| cg03534410 | 3 | 12801112  | TMEM40   | 2 | EGFR and pan-negative |
| cg11397854 | 3 | 13008878  | IQSEC1   | 2 | EGFR and pan-negative |
| cg16604516 | 3 | 13590419  | FBLN2    | 2 | EGFR and pan-negative |
| cg00625653 | 3 | 13921227  | WNT7A    | 2 | EGFR and pan-negative |
| cg04969808 | 3 | 13922158  | WNT7A    | 2 | EGFR and pan-negative |
| cg24239808 | 3 | 15641908  | HACL1    | 2 | EGFR and pan-negative |
| cg01765641 | 3 | 17781888  | TBC1D5   | 2 | EGFR and pan-negative |
| cg24997944 | 3 | 19189709  | KCNH8    | 2 | EGFR and pan-negative |
| cg07657236 | 3 | 19190202  | KCNH8    | 2 | EGFR and pan-negative |
| cg14550518 | 3 | 21792938  | ZNF385D  | 2 | EGFR and pan-negative |
| cg21303011 | 3 | 24537177  | THRB     | 2 | EGFR and pan-negative |
| cg26124016 | 3 | 25469402  | RARB     | 2 | EGFR and pan-negative |
| cg10712623 | 3 | 25469577  | RARB     | 2 | EGFR and pan-negative |
| cg27486427 | 3 | 25469919  | RARB     | 2 | EGFR and pan-negative |
| cg26035366 | 3 | 26664621  | LRRC3B   | 2 | EGFR and pan-negative |
| cg15840985 | 3 | 32023475  | OSBPL10  | 2 | EGFR and pan-negative |
| cg01617750 | 3 | 32279261  | CMTM8    | 2 | EGFR and pan-negative |
| cg27034836 | 3 | 33139098  | GLB1     | 2 | EGFR and pan-negative |
| cg12941369 | 3 | 33839389  | PDCD6IP  | 2 | EGFR and pan-negative |
| cg12417466 | 3 | 35683819  | ARPP21   | 2 | EGFR and pan-negative |
| cg25870420 | 3 | 37493949  | ITGA9    | 2 | EGFR and pan-negative |
| cg11171719 | 3 | 37903684  | CTDSPL   | 2 | EGFR and pan-negative |
| cg24868271 | 3 | 38070460  | PLCD1    | 2 | EGFR and pan-negative |
| cg15120942 | 3 | 38071578  | PLCD1    | 2 | EGFR and pan-negative |
| cg23881725 | 3 | 38080642  | DLEC1    | 2 | EGFR and pan-negative |
| cg21615171 | 3 | 38307564  | SLC22A13 | 2 | EGFR and pan-negative |
| cg12340144 | 3 | 38388808  | XYLB     | 2 | EGFR and pan-negative |
| cg21707816 | 3 | 38537451  | EXOGL    | 2 | EGFR and pan-negative |
| cg19740375 | 3 | 38690410  | SCN5A    | 2 | EGFR and pan-negative |
| cg02254461 | 3 | 39195904  | CSRNP1   | 2 | EGFR and pan-negative |
| cg02921257 | 3 | 39233858  | XIRP1    | 2 | EGFR and pan-negative |
| cg12413566 | 3 | 39235366  | XIRP1    | 2 | EGFR and pan-negative |
| cg22917487 | 3 | 39322103  | CX3CR1   | 2 | EGFR and pan-negative |
| cg26647600 | 3 | 39369720  | CCR8     | 2 | EGFR and pan-negative |
| cg23519969 | 3 | 39371797  | CCR8     | 2 | EGFR and pan-negative |
| cg16729794 | 3 | 39509195  | MOBP     | 2 | EGFR and pan-negative |
| cg19547629 | 3 | 39851641  | MYRIP    | 2 | EGFR and pan-negative |
| cg24877842 | 3 | 42201898  | TRAK1    | 2 | EGFR and pan-negative |
| cg16864658 | 3 | 42306150  | CCK      | 2 | EGFR and pan-negative |
| cg21044104 | 3 | 42451876  | LYZL4    | 2 | EGFR and pan-negative |
| cg20972495 | 3 | 42624879  | SEC22C   | 2 | EGFR and pan-negative |
| cg00412805 | 3 | 42726970  | KLHL40   | 2 | EGFR and pan-negative |
| cg00407150 | 3 | 42743794  | HHATL    | 2 | EGFR and pan-negative |
| cg13742532 | 3 | 42850848  | ACKR2    | 2 | EGFR and pan-negative |
| cg02377083 | 3 | 42851019  | ACKR2    | 2 | EGFR and pan-negative |
| cg04008913 | 3 | 43327465  | SNRK     | 2 | EGFR and pan-negative |
| cg14121103 | 3 | 43731973  | ABHD5    | 2 | EGFR and pan-negative |
| cg06566994 | 3 | 44596384  | ZKSCAN7  | 2 | EGFR and pan-negative |
| cg15767406 | 3 | 44626029  | ZNF660   | 2 | EGFR and pan-negative |
| cg22598028 | 3 | 44626492  | ZNF660   | 2 | EGFR and pan-negative |
| cg21672276 | 3 | 44754072  | ZNF502   | 2 | EGFR and pan-negative |
| cg08210616 | 3 | 44754195  | ZNF502   | 2 | EGFR and pan-negative |
| cg13571802 | 3 | 44916473  | TGM4     | 2 | EGFR and pan-negative |
| cg25766774 | 3 | 45018909  | EXOSC7   | 2 | EGFR and pan-negative |
| cg06117855 | 3 | 45067788  | CLEC3B   | 2 | EGFR and pan-negative |
| cg24975222 | 3 | 45187717  | CDGP1    | 2 | EGFR and pan-negative |

|            |   |           |          |   |                       |
|------------|---|-----------|----------|---|-----------------------|
| cg27390220 | 3 | 45268523  | TMEM158  | 2 | EGFR and pan-negative |
| cg04037228 | 3 | 45636386  | LIMD1    | 2 | EGFR and pan-negative |
| cg14415034 | 3 | 45730717  | SACM1L   | 2 | EGFR and pan-negative |
| cg22022041 | 3 | 45928137  | CCR9     | 2 | EGFR and pan-negative |
| cg25226014 | 3 | 45984942  | CXCR6    | 2 | EGFR and pan-negative |
| cg24919972 | 3 | 46037608  | FYCO1    | 2 | EGFR and pan-negative |
| cg15888522 | 3 | 46068932  | XCR1     | 2 | EGFR and pan-negative |
| cg13144783 | 3 | 46249795  | CCR1     | 2 | EGFR and pan-negative |
| cg27371741 | 3 | 46619158  | TDGF1    | 2 | EGFR and pan-negative |
| cg10242476 | 3 | 46619364  | TDGF1    | 2 | EGFR and pan-negative |
| cg19875656 | 3 | 46759096  | PRSS50   | 2 | EGFR and pan-negative |
| cg19668234 | 3 | 46759449  | PRSS50   | 2 | EGFR and pan-negative |
| cg13156411 | 3 | 46919454  | PTH1R    | 2 | EGFR and pan-negative |
| cg23042138 | 3 | 47165568  | SETD2    | 2 | EGFR and pan-negative |
| cg04523589 | 3 | 48265146  | CAMP     | 2 | EGFR and pan-negative |
| cg07125166 | 3 | 48413613  | FBXW12   | 2 | EGFR and pan-negative |
| cg03112869 | 3 | 48413769  | FBXW12   | 2 | EGFR and pan-negative |
| cg12069042 | 3 | 48466700  | PLXNB1   | 2 | EGFR and pan-negative |
| cg09837648 | 3 | 48466751  | PLXNB1   | 2 | EGFR and pan-negative |
| cg14494596 | 3 | 48542040  | SHISA5   | 2 | EGFR and pan-negative |
| cg11846236 | 3 | 48632568  | COL7A1   | 2 | EGFR and pan-negative |
| cg09736162 | 3 | 48700443  | CELSR3   | 2 | EGFR and pan-negative |
| cg06641503 | 3 | 48959341  | ARIH2    | 2 | EGFR and pan-negative |
| cg07109801 | 3 | 49057661  | MIR425   | 2 | EGFR and pan-negative |
| cg01919208 | 3 | 49170496  | LAMB2    | 2 | EGFR and pan-negative |
| cg20191453 | 3 | 49459855  | AMT      | 2 | EGFR and pan-negative |
| cg16933388 | 3 | 49592529  | BSN      | 2 | EGFR and pan-negative |
| cg03688818 | 3 | 49711147  | APEH     | 2 | EGFR and pan-negative |
| cg08687163 | 3 | 49940853  | MST1R    | 2 | EGFR and pan-negative |
| cg07640473 | 3 | 50193232  | SEMA3F   | 2 | EGFR and pan-negative |
| cg07580475 | 3 | 50304049  | SEMA3B   | 2 | EGFR and pan-negative |
| cg24816455 | 3 | 50310766  | SEMA3B   | 2 | EGFR and pan-negative |
| cg13550608 | 3 | 50314654  | 0        | 2 | EGFR and pan-negative |
| cg14757296 | 3 | 50349918  | HYAL1    | 2 | EGFR and pan-negative |
| cg00840516 | 3 | 50360097  | HYAL2    | 2 | EGFR and pan-negative |
| cg06821120 | 3 | 50375459  | RASSF1   | 2 | EGFR and pan-negative |
| cg00777121 | 3 | 50378191  | RASSF1   | 2 | EGFR and pan-negative |
| cg08047457 | 3 | 50378413  | RASSF1   | 2 | EGFR and pan-negative |
| cg21554552 | 3 | 50378425  | RASSF1   | 2 | EGFR and pan-negative |
| cg18797282 | 3 | 50387146  | CYB561D2 | 2 | EGFR and pan-negative |
| cg14035045 | 3 | 50606289  | HEMK1    | 2 | EGFR and pan-negative |
| cg15821095 | 3 | 51428079  | RBM15B   | 2 | EGFR and pan-negative |
| cg02218260 | 3 | 51742878  | GRM2     | 2 | EGFR and pan-negative |
| cg13685294 | 3 | 51743318  | GRM2     | 2 | EGFR and pan-negative |
| cg10691387 | 3 | 51895618  | IQCF2    | 2 | EGFR and pan-negative |
| cg14940420 | 3 | 51895692  | IQCF2    | 2 | EGFR and pan-negative |
| cg16660041 | 3 | 51938430  | IQCF1    | 2 | EGFR and pan-negative |
| cg20804821 | 3 | 51988454  | GPR62    | 2 | EGFR and pan-negative |
| cg08072716 | 3 | 51989692  | GPR62    | 2 | EGFR and pan-negative |
| cg08917718 | 3 | 52002169  | PCBP4    | 2 | EGFR and pan-negative |
| cg04474832 | 3 | 52008487  | ABHD14B  | 2 | EGFR and pan-negative |
| cg18328933 | 3 | 52008538  | ABHD14B  | 2 | EGFR and pan-negative |
| cg03929796 | 3 | 52231840  | ALAS1    | 2 | EGFR and pan-negative |
| cg21578541 | 3 | 52260090  | TLR9     | 2 | EGFR and pan-negative |
| cg22484793 | 3 | 52261325  | TLR9     | 2 | EGFR and pan-negative |
| cg18669588 | 3 | 52274051  | TWF2     | 2 | EGFR and pan-negative |
| cg17386185 | 3 | 52321266  | GLYCTK   | 2 | EGFR and pan-negative |
| cg04338788 | 3 | 52478874  | SEMA3G   | 2 | EGFR and pan-negative |
| cg08448751 | 3 | 52479601  | SEMA3G   | 2 | EGFR and pan-negative |
| cg10061138 | 3 | 52529085  | STAB1    | 2 | EGFR and pan-negative |
| cg15407570 | 3 | 52529524  | STAB1    | 2 | EGFR and pan-negative |
| cg10929387 | 3 | 52864659  | ITI4     | 2 | EGFR and pan-negative |
| cg25301180 | 3 | 56502091  | ERC2     | 2 | EGFR and pan-negative |
| cg04759439 | 3 | 56502612  | ERC2     | 2 | EGFR and pan-negative |
| cg20509080 | 3 | 56835873  | ARHGEF3  | 2 | EGFR and pan-negative |
| cg04563996 | 3 | 57093519  | SPATA12  | 2 | EGFR and pan-negative |
| cg13745870 | 3 | 57094763  | SPATA12  | 2 | EGFR and pan-negative |
| cg25040783 | 3 | 57261306  | APPL1    | 2 | EGFR and pan-negative |
| cg10235741 | 3 | 58200326  | 0        | 2 | EGFR and pan-negative |
| cg06638451 | 3 | 58563269  | FAM107A  | 2 | EGFR and pan-negative |
| cg01446393 | 3 | 58563609  | FAM107A  | 2 | EGFR and pan-negative |
| cg21770617 | 3 | 58652897  | FAM3D    | 2 | EGFR and pan-negative |
| cg22215728 | 3 | 61236652  | FHIT     | 2 | EGFR and pan-negative |
| cg19629292 | 3 | 62358980  | FEZF2    | 2 | EGFR and pan-negative |
| cg06423920 | 3 | 62359420  | FEZF2    | 2 | EGFR and pan-negative |
| cg11378484 | 3 | 63848695  | THOC7    | 2 | EGFR and pan-negative |
| cg01808508 | 3 | 64009536  | PSMD6    | 2 | EGFR and pan-negative |
| cg00676660 | 3 | 64672609  | ADAMTS9  | 2 | EGFR and pan-negative |
| cg13921352 | 3 | 68981890  | FAM19A4  | 2 | EGFR and pan-negative |
| cg22631938 | 3 | 71802420  | GPR27    | 2 | EGFR and pan-negative |
| cg13562542 | 3 | 71803339  | GPR27    | 2 | EGFR and pan-negative |
| cg15798455 | 3 | 71833907  | PROK2    | 2 | EGFR and pan-negative |
| cg08555612 | 3 | 71834640  | PROK2    | 2 | EGFR and pan-negative |
| cg20540428 | 3 | 73045686  | PPP4R2   | 2 | EGFR and pan-negative |
| cg21051086 | 3 | 73046214  | PPP4R2   | 2 | EGFR and pan-negative |
| cg26055770 | 3 | 73674070  | PDZRN3   | 2 | EGFR and pan-negative |
| cg14473924 | 3 | 73674170  | PDZRN3   | 2 | EGFR and pan-negative |
| cg10874403 | 3 | 87325835  | POU1F1   | 2 | EGFR and pan-negative |
| cg22619563 | 3 | 89156830  | EPHA3    | 2 | EGFR and pan-negative |
| cg04845628 | 3 | 97690690  | MINA     | 2 | EGFR and pan-negative |
| cg08375941 | 3 | 98250382  | GPR15    | 2 | EGFR and pan-negative |
| cg07435592 | 3 | 98619796  | DCBLD2   | 2 | EGFR and pan-negative |
| cg23855093 | 3 | 100328713 | GPR128   | 2 | EGFR and pan-negative |
| cg01913908 | 3 | 102154676 | ZPLD1    | 2 | EGFR and pan-negative |
| cg16338347 | 3 | 105085463 | ALCAM    | 2 | EGFR and pan-negative |

|            |   |           |              |   |                       |
|------------|---|-----------|--------------|---|-----------------------|
| cg06806080 | 3 | 107810791 | CD47         | 2 | EGFR and pan-negative |
| cg14659547 | 3 | 108476126 | RETNLB       | 2 | EGFR and pan-negative |
| cg05163071 | 3 | 108476540 | RETNLB       | 2 | EGFR and pan-negative |
| cg19561186 | 3 | 108673045 | GUCA1C       | 2 | EGFR and pan-negative |
| cg19857541 | 3 | 108836800 | MORC1        | 2 | EGFR and pan-negative |
| cg04167867 | 3 | 108837130 | MORC1        | 2 | EGFR and pan-negative |
| cg04039397 | 3 | 111260783 | CD96         | 2 | EGFR and pan-negative |
| cg24323726 | 3 | 111314186 | ZBED2        | 2 | EGFR and pan-negative |
| cg27043141 | 3 | 111851265 | GCSAM        | 2 | EGFR and pan-negative |
| cg10777851 | 3 | 112051808 | CD200        | 2 | EGFR and pan-negative |
| cg02905245 | 3 | 112359652 | CCDC80       | 2 | EGFR and pan-negative |
| cg21307628 | 3 | 112360952 | CCDC80       | 2 | EGFR and pan-negative |
| cg04070847 | 3 | 112693867 | CD200R1      | 2 | EGFR and pan-negative |
| cg13765303 | 3 | 112931390 | BOC          | 2 | EGFR and pan-negative |
| cg13334054 | 3 | 113956215 | ZNF80        | 2 | EGFR and pan-negative |
| cg03109316 | 3 | 113957903 | ZNF80        | 2 | EGFR and pan-negative |
| cg13669740 | 3 | 114012833 | TIGIT        | 2 | EGFR and pan-negative |
| cg20832020 | 3 | 114012912 | TIGIT        | 2 | EGFR and pan-negative |
| cg24650229 | 3 | 118864825 | IGSF11       | 2 | EGFR and pan-negative |
| cg14458615 | 3 | 118864952 | C3orf30      | 2 | EGFR and pan-negative |
| cg22842233 | 3 | 118892068 | UPK1B        | 2 | EGFR and pan-negative |
| cg02019333 | 3 | 118892215 | UPK1B        | 2 | EGFR and pan-negative |
| cg06509940 | 3 | 119278914 | CD80         | 2 | EGFR and pan-negative |
| cg09411212 | 3 | 119379220 | POPDC2       | 2 | EGFR and pan-negative |
| cg08145590 | 3 | 119422161 | MAATS1       | 2 | EGFR and pan-negative |
| cg02863947 | 3 | 119499190 | NR1I2        | 2 | EGFR and pan-negative |
| cg19693403 | 3 | 119962884 | GPR156       | 2 | EGFR and pan-negative |
| cg22469841 | 3 | 120169368 | FSTL1        | 2 | EGFR and pan-negative |
| cg04059863 | 3 | 121741630 | ILDR1        | 2 | EGFR and pan-negative |
| cg04387658 | 3 | 121775080 | CD86         | 2 | EGFR and pan-negative |
| cg22620680 | 3 | 122920514 | SEC22A       | 2 | EGFR and pan-negative |
| cg13384396 | 3 | 123167677 | ADCY5        | 2 | EGFR and pan-negative |
| cg04376312 | 3 | 123602485 | MYLK         | 2 | EGFR and pan-negative |
| cg18364088 | 3 | 123676909 | CCDC14       | 2 | EGFR and pan-negative |
| cg12144803 | 3 | 123813383 | KALRN        | 2 | EGFR and pan-negative |
| cg09081544 | 3 | 124652790 | MUC13        | 2 | EGFR and pan-negative |
| cg27440834 | 3 | 125239841 | SNX4         | 2 | EGFR and pan-negative |
| cg16312163 | 3 | 125899401 | ALDH1L1      | 2 | EGFR and pan-negative |
| cg07800320 | 3 | 125899567 | ALDH1L1      | 2 | EGFR and pan-negative |
| cg20312228 | 3 | 126113707 | LOC100506907 | 2 | EGFR and pan-negative |
| cg00891278 | 3 | 126113784 | CCDC37       | 2 | EGFR and pan-negative |
| cg06765947 | 3 | 126236742 | UROC1        | 2 | EGFR and pan-negative |
| cg17676574 | 3 | 126237373 | UROC1        | 2 | EGFR and pan-negative |
| cg22919728 | 3 | 126242490 | CHST13       | 2 | EGFR and pan-negative |
| cg02765820 | 3 | 126278020 | C3orf22      | 2 | EGFR and pan-negative |
| cg15057726 | 3 | 127317466 | MCM2         | 2 | EGFR and pan-negative |
| cg18353563 | 3 | 127390935 | ABTB1        | 2 | EGFR and pan-negative |
| cg03330058 | 3 | 127392403 | ABTB1        | 2 | EGFR and pan-negative |
| cg16953612 | 3 | 128185690 | DNAJB8       | 2 | EGFR and pan-negative |
| cg03022541 | 3 | 128186859 | DNAJB8       | 2 | EGFR and pan-negative |
| cg06490988 | 3 | 128212001 | GATA2        | 2 | EGFR and pan-negative |
| cg24287460 | 3 | 128748026 | EFCC1        | 2 | EGFR and pan-negative |
| cg19921389 | 3 | 128780164 | GP9          | 2 | EGFR and pan-negative |
| cg00135056 | 3 | 128997295 | C3orf37      | 2 | EGFR and pan-negative |
| cg18303397 | 3 | 129160135 | MBD4         | 2 | EGFR and pan-negative |
| cg19235307 | 3 | 129160154 | MBD4         | 2 | EGFR and pan-negative |
| cg14519134 | 3 | 129261830 | H1FOO        | 2 | EGFR and pan-negative |
| cg16673198 | 3 | 131754273 | CPNE4        | 2 | EGFR and pan-negative |
| cg15958424 | 3 | 132036067 | ACPP         | 2 | EGFR and pan-negative |
| cg20383064 | 3 | 133117420 | BFSP2        | 2 | EGFR and pan-negative |
| cg25249068 | 3 | 133118940 | BFSP2        | 2 | EGFR and pan-negative |
| cg18989919 | 3 | 133648584 | C3orf36      | 2 | EGFR and pan-negative |
| cg04757243 | 3 | 133648823 | C3orf36      | 2 | EGFR and pan-negative |
| cg19591206 | 3 | 133748809 | SLCO2A1      | 2 | EGFR and pan-negative |
| cg22406518 | 3 | 134093627 | AMOTL2       | 2 | EGFR and pan-negative |
| cg06541857 | 3 | 134203789 | CEP63        | 2 | EGFR and pan-negative |
| cg18150721 | 3 | 134514881 | EPHB1        | 2 | EGFR and pan-negative |
| cg07038400 | 3 | 135684163 | PPP2R3A      | 2 | EGFR and pan-negative |
| cg02044161 | 3 | 136675705 | IL20RB       | 2 | EGFR and pan-negative |
| cg10784090 | 3 | 137717598 | CLDN18       | 2 | EGFR and pan-negative |
| cg17298704 | 3 | 137717607 | CLDN18       | 2 | EGFR and pan-negative |
| cg18931888 | 3 | 137851874 | A4GNT        | 2 | EGFR and pan-negative |
| cg12616277 | 3 | 138153763 | ESYT3        | 2 | EGFR and pan-negative |
| cg14312526 | 3 | 138665291 | FOXJ2        | 2 | EGFR and pan-negative |
| cg17503456 | 3 | 138666054 | C3orf72      | 2 | EGFR and pan-negative |
| cg03552688 | 3 | 138822369 | BPESC1       | 2 | EGFR and pan-negative |
| cg20630151 | 3 | 138823086 | BPESC1       | 2 | EGFR and pan-negative |
| cg17778120 | 3 | 139195319 | RBP2         | 2 | EGFR and pan-negative |
| cg12497564 | 3 | 139258295 | RBP1         | 2 | EGFR and pan-negative |
| cg11027570 | 3 | 139258431 | RBP1         | 2 | EGFR and pan-negative |
| cg27457941 | 3 | 139258754 | RBP1         | 2 | EGFR and pan-negative |
| cg23363832 | 3 | 139258939 | RBP1         | 2 | EGFR and pan-negative |
| cg15878317 | 3 | 139396782 | NMNAT3       | 2 | EGFR and pan-negative |
| cg14498423 | 3 | 139653328 | CLSTN2       | 2 | EGFR and pan-negative |
| cg08853659 | 3 | 139654245 | CLSTN2       | 2 | EGFR and pan-negative |
| cg13998904 | 3 | 140396803 | TRIM42       | 2 | EGFR and pan-negative |
| cg12242338 | 3 | 140397089 | TRIM42       | 2 | EGFR and pan-negative |
| cg08380205 | 3 | 140769691 | SPSB4        | 2 | EGFR and pan-negative |
| cg22036988 | 3 | 140770345 | SPSB4        | 2 | EGFR and pan-negative |
| cg15550350 | 3 | 141497168 | GRK7         | 2 | EGFR and pan-negative |
| cg24794531 | 3 | 142443837 | TRPC1        | 2 | EGFR and pan-negative |
| cg19219437 | 3 | 142607715 | PCOLCE2      | 2 | EGFR and pan-negative |
| cg15051063 | 3 | 142893947 | 0            | 2 | EGFR and pan-negative |
| cg10883352 | 3 | 142895375 | 0            | 2 | EGFR and pan-negative |
| cg20586531 | 3 | 146263147 | PLSCR1       | 2 | EGFR and pan-negative |

|            |   |           |           |   |                       |
|------------|---|-----------|-----------|---|-----------------------|
| cg20530314 | 3 | 148415511 | AGTR1     | 2 | EGFR and pan-negative |
| cg04878152 | 3 | 148415960 | AGTR1     | 2 | EGFR and pan-negative |
| cg17439694 | 3 | 148939523 | CP        | 2 | EGFR and pan-negative |
| cg06800962 | 3 | 149096029 | TM4SF1    | 2 | EGFR and pan-negative |
| cg13688966 | 3 | 149192377 | TM4SF4    | 2 | EGFR and pan-negative |
| cg12507125 | 3 | 149375528 | WWTR1     | 2 | EGFR and pan-negative |
| cg24365013 | 3 | 150691910 | CLRN1     | 2 | EGFR and pan-negative |
| cg11630392 | 3 | 150920964 | GPR171    | 2 | EGFR and pan-negative |
| cg23273897 | 3 | 154796861 | MME       | 2 | EGFR and pan-negative |
| cg24262469 | 3 | 156391694 | TIPARP    | 2 | EGFR and pan-negative |
| cg17191178 | 3 | 157824217 | SHOX2     | 2 | EGFR and pan-negative |
| cg07654934 | 3 | 158390329 | LXN       | 2 | EGFR and pan-negative |
| cg10273210 | 3 | 160167665 | TRIM59    | 2 | EGFR and pan-negative |
| cg24147596 | 3 | 160395420 | ARL14     | 2 | EGFR and pan-negative |
| cg13619915 | 3 | 164914437 | SLITRK3   | 2 | EGFR and pan-negative |
| cg14717170 | 3 | 164914471 | SLITRK3   | 2 | EGFR and pan-negative |
| cg24197445 | 3 | 167045873 | ZBBX      | 2 | EGFR and pan-negative |
| cg12324144 | 3 | 169531663 | LRRC34    | 2 | EGFR and pan-negative |
| cg20449692 | 3 | 170136920 | CLDN11    | 2 | EGFR and pan-negative |
| cg10541755 | 3 | 170625872 | EIF5A2    | 2 | EGFR and pan-negative |
| cg22459146 | 3 | 172167030 | GHSR      | 2 | EGFR and pan-negative |
| cg06577725 | 3 | 172858917 | SPATA16   | 2 | EGFR and pan-negative |
| cg01216369 | 3 | 172859022 | SPATA16   | 2 | EGFR and pan-negative |
| cg08812936 | 3 | 178254213 | KCNMB2    | 2 | EGFR and pan-negative |
| cg10634551 | 3 | 178254242 | KCNMB2    | 2 | EGFR and pan-negative |
| cg25211252 | 3 | 178984797 | KCNMB3    | 2 | EGFR and pan-negative |
| cg00862290 | 3 | 178984973 | KCNMB3    | 2 | EGFR and pan-negative |
| cg17483510 | 3 | 179168677 | GNB4      | 2 | EGFR and pan-negative |
| cg02430692 | 3 | 179754239 | PEX5L     | 2 | EGFR and pan-negative |
| cg21176048 | 3 | 179755235 | PEX5L     | 2 | EGFR and pan-negative |
| cg27239157 | 3 | 183145817 | MCF2L2    | 2 | EGFR and pan-negative |
| cg16378421 | 3 | 183736171 | ABCC5     | 2 | EGFR and pan-negative |
| cg19815720 | 3 | 183770650 | HTR3C     | 2 | EGFR and pan-negative |
| cg18271969 | 3 | 183771499 | HTR3C     | 2 | EGFR and pan-negative |
| cg06242000 | 3 | 183966155 | ALG3      | 2 | EGFR and pan-negative |
| cg00971396 | 3 | 184081400 | POLR2H    | 2 | EGFR and pan-negative |
| cg11819637 | 3 | 184095505 | THPO      | 2 | EGFR and pan-negative |
| cg09736922 | 3 | 184095976 | THPO      | 2 | EGFR and pan-negative |
| cg25182621 | 3 | 184097440 | CHRD      | 2 | EGFR and pan-negative |
| cg03733371 | 3 | 185270528 | LIPH      | 2 | EGFR and pan-negative |
| cg01390445 | 3 | 185271312 | LIPH      | 2 | EGFR and pan-negative |
| cg25808906 | 3 | 186080023 | DGKG      | 2 | EGFR and pan-negative |
| cg25162301 | 3 | 186330055 | AHSG      | 2 | EGFR and pan-negative |
| cg07749074 | 3 | 186383386 | HRG       | 2 | EGFR and pan-negative |
| cg02097420 | 3 | 186383874 | HRG       | 2 | EGFR and pan-negative |
| cg03573747 | 3 | 186560617 | ADIPOQ    | 2 | EGFR and pan-negative |
| cg15928398 | 3 | 186647950 | ST6GAL1   | 2 | EGFR and pan-negative |
| cg07693270 | 3 | 186856928 | RPL39L    | 2 | EGFR and pan-negative |
| cg20725021 | 3 | 187009575 | MASP1     | 2 | EGFR and pan-negative |
| cg13206017 | 3 | 187388225 | SST       | 2 | EGFR and pan-negative |
| cg05044994 | 3 | 187896605 | FLJ42393  | 2 | EGFR and pan-negative |
| cg06547766 | 3 | 187930704 | LPP       | 2 | EGFR and pan-negative |
| cg18626709 | 3 | 189838693 | LEPREL1   | 2 | EGFR and pan-negative |
| cg15105660 | 3 | 190039935 | CLDN1     | 2 | EGFR and pan-negative |
| cg27235662 | 3 | 190105986 | CLDN16    | 2 | EGFR and pan-negative |
| cg11158430 | 3 | 191001413 | UTS2B     | 2 | EGFR and pan-negative |
| cg16739580 | 3 | 191179074 | PYDC2     | 2 | EGFR and pan-negative |
| cg15543551 | 3 | 192445202 | FGF12     | 2 | EGFR and pan-negative |
| cg02992632 | 3 | 192445380 | FGF12     | 2 | EGFR and pan-negative |
| cg17878972 | 3 | 192959356 | MGC2889   | 2 | EGFR and pan-negative |
| cg05820087 | 3 | 193272561 | ATP13A4   | 2 | EGFR and pan-negative |
| cg26838900 | 3 | 194090132 | LRRC15    | 2 | EGFR and pan-negative |
| cg26294551 | 3 | 194120827 | GP5       | 2 | EGFR and pan-negative |
| cg19280968 | 3 | 195270614 | PPP1R2    | 2 | EGFR and pan-negative |
| cg03362494 | 3 | 195938668 | ZDHHC19   | 2 | EGFR and pan-negative |
| cg21030598 | 3 | 196466425 | PAK2      | 2 | EGFR and pan-negative |
| cg00936626 | 3 | 196694856 | PIGZ      | 2 | EGFR and pan-negative |
| cg05788437 | 3 | 197476880 | FYTTD1    | 2 | EGFR and pan-negative |
| cg21032583 | 3 | 197685803 | IQCG      | 2 | EGFR and pan-negative |
| cg02141570 | 3 | 197808633 | ANKRD18DP | 2 | EGFR and pan-negative |
| cg05449414 | 4 | 467983    | ABCA11P   | 2 | EGFR and pan-negative |
| cg18176712 | 4 | 671489    | MYL5      | 2 | EGFR and pan-negative |
| cg23595927 | 4 | 671851    | MYL5      | 2 | EGFR and pan-negative |
| cg06154597 | 4 | 924812    | GAK       | 2 | EGFR and pan-negative |
| cg21459867 | 4 | 981492    | IDUA      | 2 | EGFR and pan-negative |
| cg03044435 | 4 | 1144077   | 0         | 2 | EGFR and pan-negative |
| cg14822966 | 4 | 1714979   | SLBP      | 2 | EGFR and pan-negative |
| cg14217157 | 4 | 2011877   | NELFA     | 2 | EGFR and pan-negative |
| cg08211091 | 4 | 2061923   | NAT8L     | 2 | EGFR and pan-negative |
| cg16474684 | 4 | 2470049   | RNF4      | 2 | EGFR and pan-negative |
| cg02142461 | 4 | 4293079   | ZBTB49    | 2 | EGFR and pan-negative |
| cg17183546 | 4 | 4387879   | NSG1      | 2 | EGFR and pan-negative |
| cg23239039 | 4 | 4389115   | NSG1      | 2 | EGFR and pan-negative |
| cg20588069 | 4 | 4860439   | MSX1      | 2 | EGFR and pan-negative |
| cg15696627 | 4 | 4861183   | MSX1      | 2 | EGFR and pan-negative |
| cg26615830 | 4 | 4861330   | MSX1      | 2 | EGFR and pan-negative |
| cg15755084 | 4 | 4861683   | MSX1      | 2 | EGFR and pan-negative |
| cg11930592 | 4 | 4861820   | MSX1      | 2 | EGFR and pan-negative |
| cg06677140 | 4 | 4862015   | MSX1      | 2 | EGFR and pan-negative |
| cg03717979 | 4 | 4862184   | MSX1      | 2 | EGFR and pan-negative |
| cg14167596 | 4 | 4862910   | MSX1      | 2 | EGFR and pan-negative |
| cg27038439 | 4 | 4864320   | MSX1      | 2 | EGFR and pan-negative |
| cg09748975 | 4 | 4864532   | MSX1      | 2 | EGFR and pan-negative |
| cg20891301 | 4 | 4864711   | MSX1      | 2 | EGFR and pan-negative |
| cg01785568 | 4 | 4864833   | MSX1      | 2 | EGFR and pan-negative |

|            |   |          |           |   |                       |
|------------|---|----------|-----------|---|-----------------------|
| cg01114088 | 4 | 5021111  | CYTL1     | 2 | EGFR and pan-negative |
| cg11768886 | 4 | 5052795  | STK32B    | 2 | EGFR and pan-negative |
| cg03278643 | 4 | 5710767  | EVC2      | 2 | EGFR and pan-negative |
| cg21210758 | 4 | 5713005  | EVC       | 2 | EGFR and pan-negative |
| cg00958560 | 4 | 5990039  | 0         | 2 | EGFR and pan-negative |
| cg25554036 | 4 | 6271136  | WFS1      | 2 | EGFR and pan-negative |
| cg03782453 | 4 | 7043935  | CCDC96    | 2 | EGFR and pan-negative |
| cg18619267 | 4 | 7940375  | AFAP1     | 2 | EGFR and pan-negative |
| cg10250107 | 4 | 7940843  | AFAP1     | 2 | EGFR and pan-negative |
| cg15957394 | 4 | 7941823  | AFAP1     | 2 | EGFR and pan-negative |
| cg07816074 | 4 | 8201560  | SH3TC1    | 2 | EGFR and pan-negative |
| cg24105933 | 4 | 8270795  | HTRA3     | 2 | EGFR and pan-negative |
| cg09495977 | 4 | 8271507  | HTRA3     | 2 | EGFR and pan-negative |
| cg10189695 | 4 | 8582300  | GPR78     | 2 | EGFR and pan-negative |
| cg00514895 | 4 | 8594413  | CPZ       | 2 | EGFR and pan-negative |
| cg03292388 | 4 | 8594514  | CPZ       | 2 | EGFR and pan-negative |
| cg08649013 | 4 | 10042198 | SLC2A9    | 2 | EGFR and pan-negative |
| cg08132711 | 4 | 15964743 | FGFBP2    | 2 | EGFR and pan-negative |
| cg21230392 | 4 | 16077697 | PROM1     | 2 | EGFR and pan-negative |
| cg08899626 | 4 | 16900199 | LDB2      | 2 | EGFR and pan-negative |
| cg18972811 | 4 | 20254736 | SLIT2     | 2 | EGFR and pan-negative |
| cg03742003 | 4 | 20255264 | SLIT2     | 2 | EGFR and pan-negative |
| cg27196467 | 4 | 21305490 | KCNIP4    | 2 | EGFR and pan-negative |
| cg08739282 | 4 | 24586511 | DHX15     | 2 | EGFR and pan-negative |
| cg05965402 | 4 | 25235416 | PI4K2B    | 2 | EGFR and pan-negative |
| cg19616230 | 4 | 25657429 | SLC34A2   | 2 | EGFR and pan-negative |
| cg10150813 | 4 | 25865178 | SEL1L3    | 2 | EGFR and pan-negative |
| cg24219058 | 4 | 30721353 | PCDH7     | 2 | EGFR and pan-negative |
| cg18821742 | 4 | 30722274 | PCDH7     | 2 | EGFR and pan-negative |
| cg15127324 | 4 | 36246442 | ARAP2     | 2 | EGFR and pan-negative |
| cg06500476 | 4 | 37584954 | C4orf19   | 2 | EGFR and pan-negative |
| cg25608041 | 4 | 37891834 | TBC1D1    | 2 | EGFR and pan-negative |
| cg00033516 | 4 | 38666773 | FLJ13197  | 2 | EGFR and pan-negative |
| cg21880903 | 4 | 39408665 | KLB       | 2 | EGFR and pan-negative |
| cg12315997 | 4 | 39461668 | LIAS      | 2 | EGFR and pan-negative |
| cg15967525 | 4 | 40517938 | RBM47     | 2 | EGFR and pan-negative |
| cg09018824 | 4 | 41361919 | LIMCH1    | 2 | EGFR and pan-negative |
| cg24719601 | 4 | 41750466 | PHOX2B    | 2 | EGFR and pan-negative |
| cg12300353 | 4 | 44450358 | KCTD8     | 2 | EGFR and pan-negative |
| cg03469082 | 4 | 46126448 | GABRG1    | 2 | EGFR and pan-negative |
| cg21820677 | 4 | 46392528 | GABRA2    | 2 | EGFR and pan-negative |
| cg15918284 | 4 | 46392657 | GABRA2    | 2 | EGFR and pan-negative |
| cg25463409 | 4 | 46848264 | COX7B2    | 2 | EGFR and pan-negative |
| cg03593419 | 4 | 46995474 | GABRA4    | 2 | EGFR and pan-negative |
| cg16358826 | 4 | 46996264 | GABRA4    | 2 | EGFR and pan-negative |
| cg12294121 | 4 | 47033575 | GABRB1    | 2 | EGFR and pan-negative |
| cg18016365 | 4 | 47033634 | GABRB1    | 2 | EGFR and pan-negative |
| cg22764341 | 4 | 47487088 | ATP10D    | 2 | EGFR and pan-negative |
| cg26018901 | 4 | 47840011 | CORIN     | 2 | EGFR and pan-negative |
| cg25351036 | 4 | 48018582 | NIPAL1    | 2 | EGFR and pan-negative |
| cg08209133 | 4 | 48485624 | SLC10A4   | 2 | EGFR and pan-negative |
| cg08942875 | 4 | 48908902 | OCIAD2    | 2 | EGFR and pan-negative |
| cg25484904 | 4 | 48988015 | CWH43     | 2 | EGFR and pan-negative |
| cg04005707 | 4 | 48988321 | CWH43     | 2 | EGFR and pan-negative |
| cg19408398 | 4 | 54243328 | FIP1L1    | 2 | EGFR and pan-negative |
| cg11465971 | 4 | 54966336 | GSX2      | 2 | EGFR and pan-negative |
| cg17286640 | 4 | 55991202 | KDR       | 2 | EGFR and pan-negative |
| cg14323109 | 4 | 55991943 | KDR       | 2 | EGFR and pan-negative |
| cg11372831 | 4 | 57303157 | PAICS     | 2 | EGFR and pan-negative |
| cg00019495 | 4 | 57547525 | HOPX      | 2 | EGFR and pan-negative |
| cg03876618 | 4 | 57976034 | LOC255130 | 2 | EGFR and pan-negative |
| cg18420965 | 4 | 66535145 | EPHA5     | 2 | EGFR and pan-negative |
| cg04398282 | 4 | 68424256 | STAP1     | 2 | EGFR and pan-negative |
| cg05480532 | 4 | 68830216 | TMPRSS11A | 2 | EGFR and pan-negative |
| cg20695587 | 4 | 68995759 | TMPRSS11F | 2 | EGFR and pan-negative |
| cg02936740 | 4 | 68995995 | TMPRSS11F | 2 | EGFR and pan-negative |
| cg01804429 | 4 | 69216077 | YTHDC1    | 2 | EGFR and pan-negative |
| cg12374577 | 4 | 69817049 | UGT2A3    | 2 | EGFR and pan-negative |
| cg04558553 | 4 | 69960869 | UGT2B7    | 2 | EGFR and pan-negative |
| cg10648113 | 4 | 70627751 | SULT1B1   | 2 | EGFR and pan-negative |
| cg00436282 | 4 | 70861449 | STATH     | 2 | EGFR and pan-negative |
| cg25040282 | 4 | 70893962 | HTN3      | 2 | EGFR and pan-negative |
| cg06545504 | 4 | 70915792 | HTN1      | 2 | EGFR and pan-negative |
| cg25600236 | 4 | 71091212 | FDCSP     | 2 | EGFR and pan-negative |
| cg10585462 | 4 | 71091866 | FDCSP     | 2 | EGFR and pan-negative |
| cg22182945 | 4 | 71200583 | CABS1     | 2 | EGFR and pan-negative |
| cg16418329 | 4 | 71200751 | CABS1     | 2 | EGFR and pan-negative |
| cg11799561 | 4 | 71227017 | SMR3A     | 2 | EGFR and pan-negative |
| cg06585690 | 4 | 71262957 | PROL1     | 2 | EGFR and pan-negative |
| cg02741177 | 4 | 71263061 | PROL1     | 2 | EGFR and pan-negative |
| cg10189763 | 4 | 71337726 | MUC7      | 2 | EGFR and pan-negative |
| cg25623640 | 4 | 71532172 | IGJ       | 2 | EGFR and pan-negative |
| cg03173722 | 4 | 71587640 | RUFY3     | 2 | EGFR and pan-negative |
| cg19850370 | 4 | 72205104 | SLC4A4    | 2 | EGFR and pan-negative |
| cg09816180 | 4 | 72650088 | GC        | 2 | EGFR and pan-negative |
| cg13643796 | 4 | 73434209 | ADAMTS3   | 2 | EGFR and pan-negative |
| cg11243196 | 4 | 73434856 | ADAMTS3   | 2 | EGFR and pan-negative |
| cg18302652 | 4 | 74606192 | IL8       | 2 | EGFR and pan-negative |
| cg22670329 | 4 | 74702075 | CXCL6     | 2 | EGFR and pan-negative |
| cg02029926 | 4 | 74734874 | CXCL1     | 2 | EGFR and pan-negative |
| cg10088985 | 4 | 74864313 | CXCL5     | 2 | EGFR and pan-negative |
| cg26866325 | 4 | 74920559 | PBPPP2    | 2 | EGFR and pan-negative |
| cg03163246 | 4 | 74921023 | PBPPP2    | 2 | EGFR and pan-negative |
| cg19302283 | 4 | 75720398 | BTC       | 2 | EGFR and pan-negative |
| cg14178991 | 4 | 76440699 | THAP6     | 2 | EGFR and pan-negative |

|            |   |           |           |   |                       |
|------------|---|-----------|-----------|---|-----------------------|
| cg22960952 | 4 | 76481169  | C4orf26   | 2 | EGFR and pan-negative |
| cg17010112 | 4 | 77227123  | STBD1     | 2 | EGFR and pan-negative |
| cg14078518 | 4 | 80329284  | GK2       | 2 | EGFR and pan-negative |
| cg17738194 | 4 | 80329388  | GK2       | 2 | EGFR and pan-negative |
| cg26090660 | 4 | 80747125  | PCAT4     | 2 | EGFR and pan-negative |
| cg02255004 | 4 | 80748660  | PCAT4     | 2 | EGFR and pan-negative |
| cg18638496 | 4 | 81187198  | FGF5      | 2 | EGFR and pan-negative |
| cg14197923 | 4 | 81187906  | FGF5      | 2 | EGFR and pan-negative |
| cg19255783 | 4 | 84035953  | PLAC8     | 2 | EGFR and pan-negative |
| cg22416721 | 4 | 88570574  | DMP1      | 2 | EGFR and pan-negative |
| cg13255629 | 4 | 88752660  | MEPE      | 2 | EGFR and pan-negative |
| cg08377000 | 4 | 90033921  | TIGD2     | 2 | EGFR and pan-negative |
| cg26578617 | 4 | 90757533  | LOC644248 | 2 | EGFR and pan-negative |
| cg15452573 | 4 | 90758843  | SNCA      | 2 | EGFR and pan-negative |
| cg14049461 | 4 | 93224987  | GRID2     | 2 | EGFR and pan-negative |
| cg04107037 | 4 | 94750205  | ATOH1     | 2 | EGFR and pan-negative |
| cg10520887 | 4 | 96470094  | UNC5C     | 2 | EGFR and pan-negative |
| cg13265789 | 4 | 96470584  | UNC5C     | 2 | EGFR and pan-negative |
| cg17725968 | 4 | 96761026  | PDHA2     | 2 | EGFR and pan-negative |
| cg27108154 | 4 | 96761377  | PDHA2     | 2 | EGFR and pan-negative |
| cg14972143 | 4 | 99851003  | EIF4E     | 2 | EGFR and pan-negative |
| cg01528948 | 4 | 100242624 | ADH1B     | 2 | EGFR and pan-negative |
| cg04263186 | 4 | 104640489 | TACR3     | 2 | EGFR and pan-negative |
| cg05389335 | 4 | 104641319 | TACR3     | 2 | EGFR and pan-negative |
| cg07360692 | 4 | 106066952 | TET2      | 2 | EGFR and pan-negative |
| cg27126442 | 4 | 106473806 | ARHGEF38  | 2 | EGFR and pan-negative |
| cg01404615 | 4 | 107958572 | DKK2      | 2 | EGFR and pan-negative |
| cg09191232 | 4 | 108642411 | PAPSS1    | 2 | EGFR and pan-negative |
| cg24727182 | 4 | 109684250 | ETNPPL    | 2 | EGFR and pan-negative |
| cg17714799 | 4 | 110625080 | CASP6     | 2 | EGFR and pan-negative |
| cg16243646 | 4 | 110651822 | PLA2G12A  | 2 | EGFR and pan-negative |
| cg05522383 | 4 | 111557894 | PITX2     | 2 | EGFR and pan-negative |
| cg03364781 | 4 | 113298593 | ALPK1     | 2 | EGFR and pan-negative |
| cg21270015 | 4 | 113567813 | LARP7     | 2 | EGFR and pan-negative |
| cg03476195 | 4 | 113970745 | ANK2      | 2 | EGFR and pan-negative |
| cg02735486 | 4 | 113970935 | ANK2      | 2 | EGFR and pan-negative |
| cg09511421 | 4 | 116034871 | NDST4     | 2 | EGFR and pan-negative |
| cg27063986 | 4 | 116035232 | NDST4     | 2 | EGFR and pan-negative |
| cg08145625 | 4 | 118006405 | TRAM1L1   | 2 | EGFR and pan-negative |
| cg05807991 | 4 | 118006808 | TRAM1L1   | 2 | EGFR and pan-negative |
| cg02519806 | 4 | 119810036 | SYNPO2    | 2 | EGFR and pan-negative |
| cg14736911 | 4 | 120057818 | MYOZ2     | 2 | EGFR and pan-negative |
| cg25550573 | 4 | 121994288 | NDNF      | 2 | EGFR and pan-negative |
| cg14654731 | 4 | 122685145 | PP12613   | 2 | EGFR and pan-negative |
| cg05396987 | 4 | 122686269 | TMEM155   | 2 | EGFR and pan-negative |
| cg18474934 | 4 | 122853965 | TRPC3     | 2 | EGFR and pan-negative |
| cg25583174 | 4 | 123748386 | FGF2      | 2 | EGFR and pan-negative |
| cg05417950 | 4 | 123843025 | NUDT6     | 2 | EGFR and pan-negative |
| cg04382920 | 4 | 128651526 | SLC25A31  | 2 | EGFR and pan-negative |
| cg15557833 | 4 | 128886857 | MFSD8     | 2 | EGFR and pan-negative |
| cg03963654 | 4 | 141177084 | SCOC      | 2 | EGFR and pan-negative |
| cg14223995 | 4 | 141489799 | UCP1      | 2 | EGFR and pan-negative |
| cg16998872 | 4 | 144826832 | GYPE      | 2 | EGFR and pan-negative |
| cg27214365 | 4 | 144940612 | GYPB      | 2 | EGFR and pan-negative |
| cg09841009 | 4 | 145061960 | GYPA      | 2 | EGFR and pan-negative |
| cg13749822 | 4 | 145566663 | HHIP      | 2 | EGFR and pan-negative |
| cg14580567 | 4 | 145567271 | HHIP-AS1  | 2 | EGFR and pan-negative |
| cg17465827 | 4 | 148538229 | TMEM184C  | 2 | EGFR and pan-negative |
| cg20334738 | 4 | 151502939 | MAB21L2   | 2 | EGFR and pan-negative |
| cg12968903 | 4 | 153601789 | TMEM154   | 2 | EGFR and pan-negative |
| cg07694025 | 4 | 154709441 | SFRP2     | 2 | EGFR and pan-negative |
| cg11354906 | 4 | 154710371 | SFRP2     | 2 | EGFR and pan-negative |
| cg23910835 | 4 | 154710900 | SFRP2     | 2 | EGFR and pan-negative |
| cg12827188 | 4 | 155511987 | FGA       | 2 | EGFR and pan-negative |
| cg00135393 | 4 | 155533661 | FGG       | 2 | EGFR and pan-negative |
| cg01593385 | 4 | 155534149 | FGG       | 2 | EGFR and pan-negative |
| cg02992596 | 4 | 155702220 | RBM46     | 2 | EGFR and pan-negative |
| cg27504805 | 4 | 156129725 | NPY2R     | 2 | EGFR and pan-negative |
| cg14586939 | 4 | 156130206 | NPY2R     | 2 | EGFR and pan-negative |
| cg02200584 | 4 | 157892546 | PDGFC     | 2 | EGFR and pan-negative |
| cg20937139 | 4 | 157892758 | PDGFC     | 2 | EGFR and pan-negative |
| cg15425280 | 4 | 158141492 | GRIA2     | 2 | EGFR and pan-negative |
| cg25148589 | 4 | 158141936 | GRIA2     | 2 | EGFR and pan-negative |
| cg13850625 | 4 | 159131690 | TMEM144   | 2 | EGFR and pan-negative |
| cg22161476 | 4 | 163085081 | FSTL5     | 2 | EGFR and pan-negative |
| cg18695917 | 4 | 163085342 | FSTL5     | 2 | EGFR and pan-negative |
| cg13975625 | 4 | 164264796 | NPY5R     | 2 | EGFR and pan-negative |
| cg18438777 | 4 | 164265745 | NPY5R     | 2 | EGFR and pan-negative |
| cg05745457 | 4 | 164394816 | TKTL2     | 2 | EGFR and pan-negative |
| cg16413535 | 4 | 164395149 | TKTL2     | 2 | EGFR and pan-negative |
| cg17271365 | 4 | 164534752 | 42430     | 2 | EGFR and pan-negative |
| cg07259382 | 4 | 164536228 | 42430     | 2 | EGFR and pan-negative |
| cg07485777 | 4 | 165952835 | TRIM60    | 2 | EGFR and pan-negative |
| cg26426582 | 4 | 165953193 | TRIM60    | 2 | EGFR and pan-negative |
| cg00498604 | 4 | 166793789 | TLL1      | 2 | EGFR and pan-negative |
| cg08570521 | 4 | 166794471 | TLL1      | 2 | EGFR and pan-negative |
| cg04518155 | 4 | 170679294 | C4orf27   | 2 | EGFR and pan-negative |
| cg12506971 | 4 | 171011264 | AADAT     | 2 | EGFR and pan-negative |
| cg27433088 | 4 | 174089019 | GALNT7    | 2 | EGFR and pan-negative |
| cg02774439 | 4 | 174451251 | HAND2     | 2 | EGFR and pan-negative |
| cg22461018 | 4 | 174538011 | 0         | 2 | EGFR and pan-negative |
| cg19968631 | 4 | 175750792 | GLRA3     | 2 | EGFR and pan-negative |
| cg22821324 | 4 | 176923439 | GPM6A     | 2 | EGFR and pan-negative |
| cg11698653 | 4 | 177190191 | ASB5      | 2 | EGFR and pan-negative |
| cg12182525 | 4 | 177190321 | ASB5      | 2 | EGFR and pan-negative |

|            |   |           |           |   |                       |
|------------|---|-----------|-----------|---|-----------------------|
| cg13378388 | 4 | 177713813 | VEGFC     | 2 | EGFR and pan-negative |
| cg17177660 | 4 | 177714456 | VEGFC     | 2 | EGFR and pan-negative |
| cg19403346 | 4 | 183066597 | MGC45800  | 2 | EGFR and pan-negative |
| cg22734085 | 4 | 184020261 | WWC2-AS2  | 2 | EGFR and pan-negative |
| cg22428102 | 4 | 184020710 | WWC2      | 2 | EGFR and pan-negative |
| cg11414151 | 4 | 185747826 | ACSL1     | 2 | EGFR and pan-negative |
| cg10000775 | 4 | 186456556 | PDLIM3    | 2 | EGFR and pan-negative |
| cg02515725 | 4 | 186456935 | PDLIM3    | 2 | EGFR and pan-negative |
| cg10063179 | 4 | 187476326 | MTNR1A    | 2 | EGFR and pan-negative |
| cg03098643 | 4 | 187644620 | FAT1      | 2 | EGFR and pan-negative |
| cg19428336 | 4 | 187645448 | FAT1      | 2 | EGFR and pan-negative |
| cg06274159 | 4 | 188916867 | ZFP42     | 2 | EGFR and pan-negative |
| cg14189571 | 4 | 188916943 | ZFP42     | 2 | EGFR and pan-negative |
| cg25569462 | 4 | 189026860 | TRIML2    | 2 | EGFR and pan-negative |
| cg04086012 | 4 | 189060900 | TRIML1    | 2 | EGFR and pan-negative |
| cg08104838 | 5 | 217068    | CCDC127   | 2 | EGFR and pan-negative |
| cg02748539 | 5 | 524269    | SLC9A3    | 2 | EGFR and pan-negative |
| cg18429742 | 5 | 851101    | ZDHHC11   | 2 | EGFR and pan-negative |
| cg26054540 | 5 | 1009204   | NKD2      | 2 | EGFR and pan-negative |
| cg19421752 | 5 | 1225224   | SLC6A18   | 2 | EGFR and pan-negative |
| cg02064402 | 5 | 1225719   | SLC6A18   | 2 | EGFR and pan-negative |
| cg02545192 | 5 | 1294729   | TERT      | 2 | EGFR and pan-negative |
| cg26205131 | 5 | 1444878   | SLC6A3    | 2 | EGFR and pan-negative |
| cg13202751 | 5 | 1446443   | SLC6A3    | 2 | EGFR and pan-negative |
| cg05365670 | 5 | 1524551   | LPCAT1    | 2 | EGFR and pan-negative |
| cg00243313 | 5 | 1883413   | IRX4      | 2 | EGFR and pan-negative |
| cg15433631 | 5 | 2751541   | IRX2      | 2 | EGFR and pan-negative |
| cg26504021 | 5 | 2752882   | C5orf38   | 2 | EGFR and pan-negative |
| cg04907257 | 5 | 7395318   | ADCY2     | 2 | EGFR and pan-negative |
| cg03663215 | 5 | 7396491   | ADCY2     | 2 | EGFR and pan-negative |
| cg23248452 | 5 | 9631117   | TAS2R1    | 2 | EGFR and pan-negative |
| cg09532664 | 5 | 9631216   | TAS2R1    | 2 | EGFR and pan-negative |
| cg25302419 | 5 | 11904015  | CTNND2    | 2 | EGFR and pan-negative |
| cg10331779 | 5 | 11904811  | CTNND2    | 2 | EGFR and pan-negative |
| cg27465566 | 5 | 14142574  | TRIO      | 2 | EGFR and pan-negative |
| cg23639989 | 5 | 14581642  | FAM105A   | 2 | EGFR and pan-negative |
| cg01794265 | 5 | 14582549  | FAM105A   | 2 | EGFR and pan-negative |
| cg03504701 | 5 | 19980857  | CDH18     | 2 | EGFR and pan-negative |
| cg27043873 | 5 | 19981429  | CDH18     | 2 | EGFR and pan-negative |
| cg10303842 | 5 | 22853730  | CDH12     | 2 | EGFR and pan-negative |
| cg15175266 | 5 | 22854704  | CDH12     | 2 | EGFR and pan-negative |
| cg19475870 | 5 | 27038605  | CDH9      | 2 | EGFR and pan-negative |
| cg12864235 | 5 | 27038782  | CDH9      | 2 | EGFR and pan-negative |
| cg05822100 | 5 | 31194410  | CDH6      | 2 | EGFR and pan-negative |
| cg01236137 | 5 | 32585526  | SUB1      | 2 | EGFR and pan-negative |
| cg07663789 | 5 | 32711429  | NPR3      | 2 | EGFR and pan-negative |
| cg05839235 | 5 | 32712237  | NPR3      | 2 | EGFR and pan-negative |
| cg16434306 | 5 | 32788128  | NPR3      | 2 | EGFR and pan-negative |
| cg24363955 | 5 | 32788467  | NPR3      | 2 | EGFR and pan-negative |
| cg14189614 | 5 | 33984660  | SLC45A2   | 2 | EGFR and pan-negative |
| cg16297030 | 5 | 35047946  | AGXT2     | 2 | EGFR and pan-negative |
| cg09745307 | 5 | 35048945  | AGXT2     | 2 | EGFR and pan-negative |
| cg17397493 | 5 | 35231272  | PRLR      | 2 | EGFR and pan-negative |
| cg24675098 | 5 | 35617879  | SPEF2     | 2 | EGFR and pan-negative |
| cg04312209 | 5 | 35857130  | IL7R      | 2 | EGFR and pan-negative |
| cg10994379 | 5 | 35939420  | CAPSL     | 2 | EGFR and pan-negative |
| cg26511075 | 5 | 36301436  | RANBP3L   | 2 | EGFR and pan-negative |
| cg07715201 | 5 | 37840839  | GDNF-AS1  | 2 | EGFR and pan-negative |
| cg23029193 | 5 | 38258216  | EGFLAM    | 2 | EGFR and pan-negative |
| cg26747293 | 5 | 38258670  | EGFLAM    | 2 | EGFR and pan-negative |
| cg27606341 | 5 | 39219632  | FYB       | 2 | EGFR and pan-negative |
| cg13703437 | 5 | 39219698  | FYB       | 2 | EGFR and pan-negative |
| cg17491456 | 5 | 39424524  | DAB2      | 2 | EGFR and pan-negative |
| cg08164315 | 5 | 40679182  | PTGER4    | 2 | EGFR and pan-negative |
| cg02588309 | 5 | 40756462  | TTC33     | 2 | EGFR and pan-negative |
| cg16250754 | 5 | 40841579  | CARD6     | 2 | EGFR and pan-negative |
| cg09179845 | 5 | 40909532  | C7        | 2 | EGFR and pan-negative |
| cg11976616 | 5 | 41213172  | C6        | 2 | EGFR and pan-negative |
| cg03050748 | 5 | 42423555  | GHR       | 2 | EGFR and pan-negative |
| cg14681629 | 5 | 43041808  | LOC153684 | 2 | EGFR and pan-negative |
| cg23502772 | 5 | 43191975  | NIM1      | 2 | EGFR and pan-negative |
| cg06597095 | 5 | 43480361  | C5orf28   | 2 | EGFR and pan-negative |
| cg14865516 | 5 | 43557751  | PAIP1     | 2 | EGFR and pan-negative |
| cg20387341 | 5 | 44389282  | FGF10     | 2 | EGFR and pan-negative |
| cg11285003 | 5 | 45696592  | HCN1      | 2 | EGFR and pan-negative |
| cg26896762 | 5 | 50679361  | LOC642366 | 2 | EGFR and pan-negative |
| cg21153758 | 5 | 52083992  | ITGA1     | 2 | EGFR and pan-negative |
| cg22625415 | 5 | 52084413  | ITGA1     | 2 | EGFR and pan-negative |
| cg07499072 | 5 | 52776694  | FST       | 2 | EGFR and pan-negative |
| cg11391732 | 5 | 53751919  | HSPB3     | 2 | EGFR and pan-negative |
| cg04705866 | 5 | 54320790  | GZMK      | 2 | EGFR and pan-negative |
| cg13352495 | 5 | 54529851  | CCNO      | 2 | EGFR and pan-negative |
| cg13560436 | 5 | 56248587  | MIER3     | 2 | EGFR and pan-negative |
| cg19135706 | 5 | 57878390  | RAB3C     | 2 | EGFR and pan-negative |
| cg14787704 | 5 | 65449380  | SREK1     | 2 | EGFR and pan-negative |
| cg09298289 | 5 | 68485754  | CENPH     | 2 | EGFR and pan-negative |
| cg15003158 | 5 | 68628431  | O         | 2 | EGFR and pan-negative |
| cg13744194 | 5 | 68788087  | OCLN      | 2 | EGFR and pan-negative |
| cg01449591 | 5 | 70320537  | NAIP      | 2 | EGFR and pan-negative |
| cg16794882 | 5 | 70670374  | PMCHL2    | 2 | EGFR and pan-negative |
| cg20798152 | 5 | 71014900  | CARTPT    | 2 | EGFR and pan-negative |
| cg23300372 | 5 | 71015432  | CARTPT    | 2 | EGFR and pan-negative |
| cg02001410 | 5 | 71403045  | MAP1B     | 2 | EGFR and pan-negative |
| cg07380496 | 5 | 71403420  | MAP1B     | 2 | EGFR and pan-negative |
| cg25177452 | 5 | 72416677  | TMEM171   | 2 | EGFR and pan-negative |

|            |   |           |              |   |                       |
|------------|---|-----------|--------------|---|-----------------------|
| cg05731779 | 5 | 72463687  | 0            | 2 | EGFR and pan-negative |
| cg15905124 | 5 | 72464325  | 0            | 2 | EGFR and pan-negative |
| cg03663715 | 5 | 72744904  | FOXD1        | 2 | EGFR and pan-negative |
| cg11743470 | 5 | 74327277  | GCNT4        | 2 | EGFR and pan-negative |
| cg19297823 | 5 | 74327281  | GCNT4        | 2 | EGFR and pan-negative |
| cg11591325 | 5 | 76012591  | F2R          | 2 | EGFR and pan-negative |
| cg06339657 | 5 | 76505932  | PDE8B        | 2 | EGFR and pan-negative |
| cg18089852 | 5 | 76507050  | PDE8B        | 2 | EGFR and pan-negative |
| cg24231716 | 5 | 76934501  | OTP          | 2 | EGFR and pan-negative |
| cg01692815 | 5 | 77591420  | AP3B1        | 2 | EGFR and pan-negative |
| cg06759890 | 5 | 77806538  | LHFPL2       | 2 | EGFR and pan-negative |
| cg03400060 | 5 | 78365801  | BHMT2        | 2 | EGFR and pan-negative |
| cg05890484 | 5 | 78407552  | BHMT         | 2 | EGFR and pan-negative |
| cg22979433 | 5 | 80528609  | CKMT2        | 2 | EGFR and pan-negative |
| cg00540769 | 5 | 80689492  | ACOT12       | 2 | EGFR and pan-negative |
| cg21942082 | 5 | 80690225  | ACOT12       | 2 | EGFR and pan-negative |
| cg00567749 | 5 | 82767908  | VCAN         | 2 | EGFR and pan-negative |
| cg06434428 | 5 | 83016630  | HAPLN1       | 2 | EGFR and pan-negative |
| cg16773899 | 5 | 83680326  | EDIL3        | 2 | EGFR and pan-negative |
| cg03478689 | 5 | 83680717  | EDIL3        | 2 | EGFR and pan-negative |
| cg20938689 | 5 | 85913915  | COX7C        | 2 | EGFR and pan-negative |
| cg03952109 | 5 | 93409932  | FAM172A      | 2 | EGFR and pan-negative |
| cg09244244 | 5 | 94891907  | ARSK         | 2 | EGFR and pan-negative |
| cg04597449 | 5 | 94955575  | GPR150       | 2 | EGFR and pan-negative |
| cg19108718 | 5 | 94982330  | RFESD        | 2 | EGFR and pan-negative |
| cg04011402 | 5 | 95188290  | C5orf27      | 2 | EGFR and pan-negative |
| cg15234096 | 5 | 96479253  | LIX1         | 2 | EGFR and pan-negative |
| cg20131596 | 5 | 102201128 | PAM          | 2 | EGFR and pan-negative |
| cg21596317 | 5 | 102201545 | PAM          | 2 | EGFR and pan-negative |
| cg15453943 | 5 | 104434827 | RAB9BP1      | 2 | EGFR and pan-negative |
| cg10846922 | 5 | 104435608 | RAB9BP1      | 2 | EGFR and pan-negative |
| cg05497616 | 5 | 110560372 | CAMK4        | 2 | EGFR and pan-negative |
| cg03775246 | 5 | 111095049 | NREP         | 2 | EGFR and pan-negative |
| cg03558807 | 5 | 111495981 | EPB41L4A-AS1 | 2 | EGFR and pan-negative |
| cg01240931 | 5 | 112074043 | APC          | 2 | EGFR and pan-negative |
| cg06894812 | 5 | 112630225 | MCC          | 2 | EGFR and pan-negative |
| cg23973000 | 5 | 112770527 | TSSK1B       | 2 | EGFR and pan-negative |
| cg16581199 | 5 | 112770721 | TSSK1B       | 2 | EGFR and pan-negative |
| cg23615676 | 5 | 113697632 | KCNN2        | 2 | EGFR and pan-negative |
| cg27403635 | 5 | 113698291 | KCNN2        | 2 | EGFR and pan-negative |
| cg10693071 | 5 | 114516422 | TRIM36       | 2 | EGFR and pan-negative |
| cg11897314 | 5 | 119799832 | PRR16        | 2 | EGFR and pan-negative |
| cg11234457 | 5 | 121187547 | FTMT         | 2 | EGFR and pan-negative |
| cg04963951 | 5 | 121187764 | FTMT         | 2 | EGFR and pan-negative |
| cg22836153 | 5 | 121412702 | LOX          | 2 | EGFR and pan-negative |
| cg02548238 | 5 | 121413050 | LOX          | 2 | EGFR and pan-negative |
| cg01429321 | 5 | 121413797 | LOX          | 2 | EGFR and pan-negative |
| cg06508445 | 5 | 121414088 | LOX          | 2 | EGFR and pan-negative |
| cg22282672 | 5 | 121465223 | ZNF474       | 2 | EGFR and pan-negative |
| cg04747322 | 5 | 121647308 | SNCAIP       | 2 | EGFR and pan-negative |
| cg04684516 | 5 | 121647858 | SNCAIP       | 2 | EGFR and pan-negative |
| cg05389183 | 5 | 122372942 | PPIC         | 2 | EGFR and pan-negative |
| cg19298821 | 5 | 125967357 | C5orf48      | 2 | EGFR and pan-negative |
| cg06940792 | 5 | 126626557 | MEGF10       | 2 | EGFR and pan-negative |
| cg26465611 | 5 | 126626719 | MEGF10       | 2 | EGFR and pan-negative |
| cg25084878 | 5 | 127873711 | FBN2         | 2 | EGFR and pan-negative |
| cg07103493 | 5 | 128301232 | SLC27A6      | 2 | EGFR and pan-negative |
| cg13701109 | 5 | 128795472 | ADAMTS19     | 2 | EGFR and pan-negative |
| cg15034135 | 5 | 128796168 | ADAMTS19     | 2 | EGFR and pan-negative |
| cg13259290 | 5 | 131408382 | CSF2         | 2 | EGFR and pan-negative |
| cg02196805 | 5 | 131409637 | CSF2         | 2 | EGFR and pan-negative |
| cg01305625 | 5 | 131593812 | PDLIM4       | 2 | EGFR and pan-negative |
| cg26081812 | 5 | 131880480 | IL5          | 2 | EGFR and pan-negative |
| cg15619794 | 5 | 131880649 | IL5          | 2 | EGFR and pan-negative |
| cg14523284 | 5 | 131993614 | IL13         | 2 | EGFR and pan-negative |
| cg08801754 | 5 | 132363022 | ZCCHC10      | 2 | EGFR and pan-negative |
| cg27543230 | 5 | 133562604 | PPP2CA       | 2 | EGFR and pan-negative |
| cg19096540 | 5 | 133748191 | CDKN2AIPNL   | 2 | EGFR and pan-negative |
| cg20300655 | 5 | 134303572 | CATSPER3     | 2 | EGFR and pan-negative |
| cg08452348 | 5 | 134303703 | CATSPER3     | 2 | EGFR and pan-negative |
| cg01550148 | 5 | 134735544 | H2AFY        | 2 | EGFR and pan-negative |
| cg24628744 | 5 | 134735654 | H2AFY        | 2 | EGFR and pan-negative |
| cg13349425 | 5 | 134783075 | C5orf20      | 2 | EGFR and pan-negative |
| cg14722162 | 5 | 134783186 | C5orf20      | 2 | EGFR and pan-negative |
| cg04897683 | 5 | 134871462 | NEUROG1      | 2 | EGFR and pan-negative |
| cg11248413 | 5 | 134871658 | NEUROG1      | 2 | EGFR and pan-negative |
| cg17830308 | 5 | 134872124 | NEUROG1      | 2 | EGFR and pan-negative |
| cg18995088 | 5 | 134914734 | CXCL14       | 2 | EGFR and pan-negative |
| cg21783004 | 5 | 135290288 | LECT2        | 2 | EGFR and pan-negative |
| cg00386408 | 5 | 135364970 | TGFB1        | 2 | EGFR and pan-negative |
| cg12832649 | 5 | 136834863 | SPOCK1       | 2 | EGFR and pan-negative |
| cg13847070 | 5 | 137071523 | KLHL3        | 2 | EGFR and pan-negative |
| cg09513026 | 5 | 137419242 | WNT8A        | 2 | EGFR and pan-negative |
| cg08603768 | 5 | 137420044 | WNT8A        | 2 | EGFR and pan-negative |
| cg02276665 | 5 | 138088442 | CTNNA1       | 2 | EGFR and pan-negative |
| cg13500819 | 5 | 138725400 | MZB1         | 2 | EGFR and pan-negative |
| cg16983159 | 5 | 138862441 | TMEM173      | 2 | EGFR and pan-negative |
| cg04686412 | 5 | 139175658 | PSD2         | 2 | EGFR and pan-negative |
| cg01599709 | 5 | 139725677 | HBEGF        | 2 | EGFR and pan-negative |
| cg10731022 | 5 | 139927252 | EIF4EBP3     | 2 | EGFR and pan-negative |
| cg26556719 | 5 | 140261810 | PCDHA13      | 2 | EGFR and pan-negative |
| cg18902090 | 5 | 140306249 | PCDHAC1      | 2 | EGFR and pan-negative |
| cg12629325 | 5 | 140306458 | PCDHAC1      | 2 | EGFR and pan-negative |
| cg10887021 | 5 | 140474145 | PCDHB2       | 2 | EGFR and pan-negative |
| cg02260587 | 5 | 140474248 | PCDHB2       | 2 | EGFR and pan-negative |

|            |   |           |          |   |                       |
|------------|---|-----------|----------|---|-----------------------|
| cg03504078 | 5 | 140480218 | PCDHB3   | 2 | EGFR and pan-negative |
| cg03349953 | 5 | 140515207 | PCDHB5   | 2 | EGFR and pan-negative |
| cg12343638 | 5 | 140588231 | PCDHB12  | 2 | EGFR and pan-negative |
| cg07899016 | 5 | 140588299 | PCDHB12  | 2 | EGFR and pan-negative |
| cg06327515 | 5 | 140603261 | PCDHB14  | 2 | EGFR and pan-negative |
| cg07730329 | 5 | 140810137 | PCDHGA12 | 2 | EGFR and pan-negative |
| cg02780295 | 5 | 140855463 | PCDHGC3  | 2 | EGFR and pan-negative |
| cg00943245 | 5 | 140867386 | PCDHGC5  | 2 | EGFR and pan-negative |
| cg17108383 | 5 | 140867724 | PCDHGC5  | 2 | EGFR and pan-negative |
| cg10414058 | 5 | 141017903 | RELL2    | 2 | EGFR and pan-negative |
| cg11136562 | 5 | 141061285 | ARAP3    | 2 | EGFR and pan-negative |
| cg08158289 | 5 | 141302729 | KIAA0141 | 2 | EGFR and pan-negative |
| cg12845808 | 5 | 141338604 | PCDH12   | 2 | EGFR and pan-negative |
| cg04797496 | 5 | 141339086 | PCDH12   | 2 | EGFR and pan-negative |
| cg00145118 | 5 | 141393931 | GNPDA1   | 2 | EGFR and pan-negative |
| cg08818984 | 5 | 142814827 | NR3C1    | 2 | EGFR and pan-negative |
| cg11572744 | 5 | 146832933 | DPYSL3   | 2 | EGFR and pan-negative |
| cg04577715 | 5 | 147211181 | SPINK1   | 2 | EGFR and pan-negative |
| cg17788013 | 5 | 147443252 | SPINK5   | 2 | EGFR and pan-negative |
| cg07102705 | 5 | 148033896 | HTR4     | 2 | EGFR and pan-negative |
| cg01965939 | 5 | 148442694 | SH3TC2   | 2 | EGFR and pan-negative |
| cg00298357 | 5 | 148758791 | IL17B    | 2 | EGFR and pan-negative |
| cg25141490 | 5 | 148759090 | IL17B    | 2 | EGFR and pan-negative |
| cg19382175 | 5 | 149324712 | PDE6A    | 2 | EGFR and pan-negative |
| cg07260017 | 5 | 149492480 | CSF1R    | 2 | EGFR and pan-negative |
| cg04569804 | 5 | 149493814 | CSF1R    | 2 | EGFR and pan-negative |
| cg12727795 | 5 | 149535695 | PDGFRB   | 2 | EGFR and pan-negative |
| cg09588653 | 5 | 149569276 | SLC6A7   | 2 | EGFR and pan-negative |
| cg19435264 | 5 | 149569537 | SLC6A7   | 2 | EGFR and pan-negative |
| cg22975568 | 5 | 149793436 | CD74     | 2 | EGFR and pan-negative |
| cg25677709 | 5 | 149900459 | NDST1    | 2 | EGFR and pan-negative |
| cg13590277 | 5 | 150019496 | SYNPO    | 2 | EGFR and pan-negative |
| cg12172720 | 5 | 150019603 | SYNPO    | 2 | EGFR and pan-negative |
| cg12346881 | 5 | 150283885 | ZNF300   | 2 | EGFR and pan-negative |
| cg19014419 | 5 | 150284504 | ZNF300   | 2 | EGFR and pan-negative |
| cg18849169 | 5 | 150399781 | GPX3     | 2 | EGFR and pan-negative |
| cg07699362 | 5 | 150400139 | GPX3     | 2 | EGFR and pan-negative |
| cg21516478 | 5 | 150400328 | GPX3     | 2 | EGFR and pan-negative |
| cg21623671 | 5 | 150536851 | ANXA6    | 2 | EGFR and pan-negative |
| cg08317263 | 5 | 150603169 | CCDC69   | 2 | EGFR and pan-negative |
| cg22445920 | 5 | 150683178 | SLC36A3  | 2 | EGFR and pan-negative |
| cg01678321 | 5 | 150683530 | SLC36A3  | 2 | EGFR and pan-negative |
| cg04443324 | 5 | 150948306 | FAT2     | 2 | EGFR and pan-negative |
| cg09801065 | 5 | 150949152 | FAT2     | 2 | EGFR and pan-negative |
| cg25913233 | 5 | 151066683 | SPARC    | 2 | EGFR and pan-negative |
| cg00059225 | 5 | 151304357 | GLRA1    | 2 | EGFR and pan-negative |
| cg03914397 | 5 | 151784441 | NMUR2    | 2 | EGFR and pan-negative |
| cg17020834 | 5 | 152870258 | GRIA1    | 2 | EGFR and pan-negative |
| cg08578734 | 5 | 152870490 | GRIA1    | 2 | EGFR and pan-negative |
| cg19721889 | 5 | 153857789 | HAND1    | 2 | EGFR and pan-negative |
| cg00405677 | 5 | 153858102 | HAND1    | 2 | EGFR and pan-negative |
| cg23613317 | 5 | 154092109 | LARP1    | 2 | EGFR and pan-negative |
| cg13689073 | 5 | 154093260 | LARP1    | 2 | EGFR and pan-negative |
| cg10257049 | 5 | 154230308 | FAXDC2   | 2 | EGFR and pan-negative |
| cg04435420 | 5 | 155754009 | SGCD     | 2 | EGFR and pan-negative |
| cg17484237 | 5 | 156536107 | HAVCR2   | 2 | EGFR and pan-negative |
| cg19110684 | 5 | 156536955 | HAVCR2   | 2 | EGFR and pan-negative |
| cg14376424 | 5 | 156592780 | FAM71B   | 2 | EGFR and pan-negative |
| cg01546430 | 5 | 156607836 | ITK      | 2 | EGFR and pan-negative |
| cg09453312 | 5 | 156608118 | ITK      | 2 | EGFR and pan-negative |
| cg00986320 | 5 | 156695551 | CYFIP2   | 2 | EGFR and pan-negative |
| cg20541456 | 5 | 156696520 | CYFIP2   | 2 | EGFR and pan-negative |
| cg26790059 | 5 | 156772562 | FNDC9    | 2 | EGFR and pan-negative |
| cg07540118 | 5 | 157002713 | ADAM19   | 2 | EGFR and pan-negative |
| cg09079275 | 5 | 157003083 | ADAM19   | 2 | EGFR and pan-negative |
| cg10715231 | 5 | 157079546 | SOX30    | 2 | EGFR and pan-negative |
| cg21575929 | 5 | 159344281 | ADRA1B   | 2 | EGFR and pan-negative |
| cg22861316 | 5 | 159656660 | FABP6    | 2 | EGFR and pan-negative |
| cg19742789 | 5 | 159739256 | CCNJL    | 2 | EGFR and pan-negative |
| cg17178888 | 5 | 159739851 | CCNJL    | 2 | EGFR and pan-negative |
| cg01939681 | 5 | 160975024 | GABRB2   | 2 | EGFR and pan-negative |
| cg16509658 | 5 | 160975347 | GABRB2   | 2 | EGFR and pan-negative |
| cg22672790 | 5 | 161112787 | GABRA6   | 2 | EGFR and pan-negative |
| cg07592353 | 5 | 161113339 | GABRA6   | 2 | EGFR and pan-negative |
| cg02065387 | 5 | 161274307 | GABRA1   | 2 | EGFR and pan-negative |
| cg11732619 | 5 | 168728076 | SLIT3    | 2 | EGFR and pan-negative |
| cg19233472 | 5 | 169532752 | FOXI1    | 2 | EGFR and pan-negative |
| cg00661485 | 5 | 169533372 | FOXI1    | 2 | EGFR and pan-negative |
| cg08422599 | 5 | 169931092 | KCNIP1   | 2 | EGFR and pan-negative |
| cg23181170 | 5 | 170210672 | GABRP    | 2 | EGFR and pan-negative |
| cg21652012 | 5 | 170211009 | GABRP    | 2 | EGFR and pan-negative |
| cg10837843 | 5 | 172199244 | DUSP1    | 2 | EGFR and pan-negative |
| cg16957313 | 5 | 172199661 | DUSP1    | 2 | EGFR and pan-negative |
| cg03294619 | 5 | 172661803 | NKX2-5   | 2 | EGFR and pan-negative |
| cg03032025 | 5 | 173316748 | CPEB4    | 2 | EGFR and pan-negative |
| cg27096144 | 5 | 174151779 | MSX2     | 2 | EGFR and pan-negative |
| cg16112129 | 5 | 174870968 | DRD1     | 2 | EGFR and pan-negative |
| cg17307280 | 5 | 174871636 | DRD1     | 2 | EGFR and pan-negative |
| cg20277670 | 5 | 175110375 | HRH2     | 2 | EGFR and pan-negative |
| cg22776578 | 5 | 175223497 | CPLX2    | 2 | EGFR and pan-negative |
| cg26620356 | 5 | 175789238 | KIAA1191 | 2 | EGFR and pan-negative |
| cg27092035 | 5 | 175792880 | ARL10    | 2 | EGFR and pan-negative |
| cg01684579 | 5 | 175816834 | NOP16    | 2 | EGFR and pan-negative |
| cg27035806 | 5 | 175817338 | 0        | 2 | EGFR and pan-negative |
| cg05028467 | 5 | 176057097 | SNCB     | 2 | EGFR and pan-negative |

|            |   |           |                |   |                       |
|------------|---|-----------|----------------|---|-----------------------|
| cg07035740 | 5 | 176057740 | EIF4E1B        | 2 | EGFR and pan-negative |
| cg02616808 | 5 | 176236654 | UNC5A          | 2 | EGFR and pan-negative |
| cg12893143 | 5 | 176237996 | UNC5A          | 2 | EGFR and pan-negative |
| cg18546419 | 5 | 176433891 | UIMC1          | 2 | EGFR and pan-negative |
| cg13284426 | 5 | 176732122 | PRELID1        | 2 | EGFR and pan-negative |
| cg01567482 | 5 | 176784318 | RGS14          | 2 | EGFR and pan-negative |
| cg23983884 | 5 | 176900806 | DBN1           | 2 | EGFR and pan-negative |
| cg25553916 | 5 | 177558755 | RMND5B         | 2 | EGFR and pan-negative |
| cg00273124 | 5 | 177581512 | NHP2           | 2 | EGFR and pan-negative |
| cg20546002 | 5 | 178017376 | COL23A1        | 2 | EGFR and pan-negative |
| cg10730712 | 5 | 178017827 | COL23A1        | 2 | EGFR and pan-negative |
| cg12766348 | 5 | 178054039 | CLK4           | 2 | EGFR and pan-negative |
| cg19236727 | 5 | 178287717 | ZNF354B        | 2 | EGFR and pan-negative |
| cg27654142 | 5 | 178322924 | ZFP2           | 2 | EGFR and pan-negative |
| cg11538128 | 5 | 178487481 | ZNF354C        | 2 | EGFR and pan-negative |
| cg04488521 | 5 | 178487716 | ZNF354C        | 2 | EGFR and pan-negative |
| cg14409941 | 5 | 178771781 | ADAMTS2        | 2 | EGFR and pan-negative |
| cg01593190 | 5 | 178772793 | ADAMTS2        | 2 | EGFR and pan-negative |
| cg16361890 | 5 | 179220545 | LTC4S          | 2 | EGFR and pan-negative |
| cg11394785 | 5 | 179221090 | LTC4S          | 2 | EGFR and pan-negative |
| cg21937886 | 5 | 179779954 | GFPT2          | 2 | EGFR and pan-negative |
| cg18602314 | 5 | 179780802 | GFPT2          | 2 | EGFR and pan-negative |
| cg16585682 | 5 | 180017623 | SCGB3A1        | 2 | EGFR and pan-negative |
| cg14472601 | 5 | 180019112 | SCGB3A1        | 2 | EGFR and pan-negative |
| cg24024214 | 5 | 180326142 | BTNL8          | 2 | EGFR and pan-negative |
| cg15516226 | 5 | 180467519 | BTNL9          | 2 | EGFR and pan-negative |
| cg11360149 | 5 | 180581315 | OR2V2          | 2 | EGFR and pan-negative |
| cg05071677 | 5 | 180581950 | OR2V2          | 2 | EGFR and pan-negative |
| cg12741420 | 6 | 392131    | IRF4           | 2 | EGFR and pan-negative |
| cg14809191 | 6 | 1311825   | FOXQ1          | 2 | EGFR and pan-negative |
| cg03848675 | 6 | 1389146   | FOXF2          | 2 | EGFR and pan-negative |
| cg08045570 | 6 | 1390502   | FOXF2          | 2 | EGFR and pan-negative |
| cg04504095 | 6 | 1610688   | FOXC1          | 2 | EGFR and pan-negative |
| cg03462055 | 6 | 3227556   | TUBB2B         | 2 | EGFR and pan-negative |
| cg15637528 | 6 | 4078959   | C6orf201       | 2 | EGFR and pan-negative |
| cg11504897 | 6 | 6007412   | NRN1           | 2 | EGFR and pan-negative |
| cg03440267 | 6 | 6321061   | F13A1          | 2 | EGFR and pan-negative |
| cg20162076 | 6 | 6588089   | LY86           | 2 | EGFR and pan-negative |
| cg17774418 | 6 | 6622864   | LY86-AS1       | 2 | EGFR and pan-negative |
| cg18201198 | 6 | 6623578   | LY86-AS1       | 2 | EGFR and pan-negative |
| cg14267151 | 6 | 8066098   | BLOC1S5-TXNDC5 | 2 | EGFR and pan-negative |
| cg09548084 | 6 | 8436218   | LOC100506207   | 2 | EGFR and pan-negative |
| cg12439899 | 6 | 10415232  | TFAP2A         | 2 | EGFR and pan-negative |
| cg25202471 | 6 | 10415540  | TFAP2A         | 2 | EGFR and pan-negative |
| cg26385286 | 6 | 10527815  | GCNT2          | 2 | EGFR and pan-negative |
| cg09829319 | 6 | 10882238  | GCM2           | 2 | EGFR and pan-negative |
| cg13562911 | 6 | 11044106  | ELOVL2-AS1     | 2 | EGFR and pan-negative |
| cg11249173 | 6 | 11112209  | ERVFRD-1       | 2 | EGFR and pan-negative |
| cg09754413 | 6 | 13925567  | RNF182         | 2 | EGFR and pan-negative |
| cg01288598 | 6 | 14118227  | CD83           | 2 | EGFR and pan-negative |
| cg22736354 | 6 | 18122719  | NHLRC1         | 2 | EGFR and pan-negative |
| cg17252960 | 6 | 19837350  | ID4            | 2 | EGFR and pan-negative |
| cg01173186 | 6 | 24126221  | NRSN1          | 2 | EGFR and pan-negative |
| cg02854090 | 6 | 25726895  | HIST1H2AA      | 2 | EGFR and pan-negative |
| cg03835296 | 6 | 25830922  | SLC17A1        | 2 | EGFR and pan-negative |
| cg10146929 | 6 | 26017939  | HIST1H1A       | 2 | EGFR and pan-negative |
| cg14652095 | 6 | 26018185  | HIST1H1A       | 2 | EGFR and pan-negative |
| cg08797106 | 6 | 26021008  | HIST1H3A       | 2 | EGFR and pan-negative |
| cg06069731 | 6 | 26043791  | HIST1H2BB      | 2 | EGFR and pan-negative |
| cg17711541 | 6 | 26124704  | HIST1H2AC      | 2 | EGFR and pan-negative |
| cg21146268 | 6 | 26183508  | HIST1H2BE      | 2 | EGFR and pan-negative |
| cg21026663 | 6 | 26189234  | HIST1H4D       | 2 | EGFR and pan-negative |
| cg08307092 | 6 | 26200174  | HIST1H2BF      | 2 | EGFR and pan-negative |
| cg16706631 | 6 | 26204823  | HIST1H4E       | 2 | EGFR and pan-negative |
| cg08687901 | 6 | 26204924  | HIST1H4E       | 2 | EGFR and pan-negative |
| cg27133864 | 6 | 26216541  | HIST1H2BG      | 2 | EGFR and pan-negative |
| cg20520725 | 6 | 26217564  | HIST1H2AE      | 2 | EGFR and pan-negative |
| cg14776962 | 6 | 26251899  | HIST1H2BH      | 2 | EGFR and pan-negative |
| cg02909790 | 6 | 26271587  | HIST1H3G       | 2 | EGFR and pan-negative |
| cg02192855 | 6 | 26273199  | HIST1H2BI      | 2 | EGFR and pan-negative |
| cg27059238 | 6 | 26273326  | HIST1H2BI      | 2 | EGFR and pan-negative |
| cg15599064 | 6 | 26285655  | HIST1H4H       | 2 | EGFR and pan-negative |
| cg14345882 | 6 | 26364793  | BTN3A2         | 2 | EGFR and pan-negative |
| cg07011110 | 6 | 26500482  | BTN1A1         | 2 | EGFR and pan-negative |
| cg08717396 | 6 | 27100775  | HIST1H2AG      | 2 | EGFR and pan-negative |
| cg24358465 | 6 | 27100860  | HIST1H2AG      | 2 | EGFR and pan-negative |
| cg21269897 | 6 | 27107002  | HIST1H4I       | 2 | EGFR and pan-negative |
| cg02599464 | 6 | 27107097  | HIST1H4I       | 2 | EGFR and pan-negative |
| cg05142576 | 6 | 27114781  | HIST1H2AH      | 2 | EGFR and pan-negative |
| cg22349489 | 6 | 27114943  | HIST1H2AH      | 2 | EGFR and pan-negative |
| cg02704907 | 6 | 27116113  | HIST1H2BK      | 2 | EGFR and pan-negative |
| cg02248540 | 6 | 27776308  | HIST1H2AI      | 2 | EGFR and pan-negative |
| cg03221914 | 6 | 27783331  | HIST1H2AJ      | 2 | EGFR and pan-negative |
| cg10608333 | 6 | 27799360  | HIST1H4K       | 2 | EGFR and pan-negative |
| cg02367951 | 6 | 27806562  | HIST1H2BN      | 2 | EGFR and pan-negative |
| cg12181621 | 6 | 27840068  | HIST1H3I       | 2 | EGFR and pan-negative |
| cg17651821 | 6 | 27841683  | HIST1H4L       | 2 | EGFR and pan-negative |
| cg17965019 | 6 | 27858545  | HIST1H3J       | 2 | EGFR and pan-negative |
| cg17718302 | 6 | 27858637  | HIST1H3J       | 2 | EGFR and pan-negative |
| cg12629515 | 6 | 27859811  | HIST1H3J       | 2 | EGFR and pan-negative |
| cg20029652 | 6 | 28249545  | PGBD1          | 2 | EGFR and pan-negative |
| cg04878727 | 6 | 28317483  | ZKSCAN3        | 2 | EGFR and pan-negative |
| cg02622316 | 6 | 28367410  | ZSCAN12        | 2 | EGFR and pan-negative |
| cg07660236 | 6 | 28367883  | ZSCAN12        | 2 | EGFR and pan-negative |
| cg26170660 | 6 | 28493601  | GPX5           | 2 | EGFR and pan-negative |

|            |   |          |           |   |                       |
|------------|---|----------|-----------|---|-----------------------|
| cg13283751 | 6 | 28493811 | GPX5      | 2 | EGFR and pan-negative |
| cg05779068 | 6 | 29014046 | OR2W1     | 2 | EGFR and pan-negative |
| cg20856834 | 6 | 29342522 | OR12D3    | 2 | EGFR and pan-negative |
| cg03608577 | 6 | 29342679 | OR12D3    | 2 | EGFR and pan-negative |
| cg02117021 | 6 | 29425960 | OR2H1     | 2 | EGFR and pan-negative |
| cg24063382 | 6 | 29457061 | MAS1L     | 2 | EGFR and pan-negative |
| cg21529533 | 6 | 29796015 | HLA-G     | 2 | EGFR and pan-negative |
| cg23244913 | 6 | 29943401 | HCG9      | 2 | EGFR and pan-negative |
| cg04623837 | 6 | 29943414 | HCG9      | 2 | EGFR and pan-negative |
| cg15238224 | 6 | 30081408 | TRIM31    | 2 | EGFR and pan-negative |
| cg09196959 | 6 | 30104440 | TRIM40    | 2 | EGFR and pan-negative |
| cg07405796 | 6 | 30104552 | TRIM40    | 2 | EGFR and pan-negative |
| cg27519140 | 6 | 30312645 | RPP21     | 2 | EGFR and pan-negative |
| cg04273431 | 6 | 30523215 | PRR3      | 2 | EGFR and pan-negative |
| cg21264055 | 6 | 30523242 | PRR3      | 2 | EGFR and pan-negative |
| cg03270204 | 6 | 30851638 | DDR1      | 2 | EGFR and pan-negative |
| cg14034870 | 6 | 30900197 | SFTA2     | 2 | EGFR and pan-negative |
| cg16150435 | 6 | 31080529 | C6orf15   | 2 | EGFR and pan-negative |
| cg08424423 | 6 | 31088188 | CDSN      | 2 | EGFR and pan-negative |
| cg24735489 | 6 | 31088352 | CDSN      | 2 | EGFR and pan-negative |
| cg09508556 | 6 | 31106982 | PSORS1C2  | 2 | EGFR and pan-negative |
| cg22458065 | 6 | 31108108 | PSORS1C2  | 2 | EGFR and pan-negative |
| cg13083810 | 6 | 31139156 | POU5F1    | 2 | EGFR and pan-negative |
| cg16097079 | 6 | 31239916 | HLA-C     | 2 | EGFR and pan-negative |
| cg13784557 | 6 | 31430916 | HCP5      | 2 | EGFR and pan-negative |
| cg07971188 | 6 | 31431100 | HCP5      | 2 | EGFR and pan-negative |
| cg16268563 | 6 | 31513680 | ATP6V1G2  | 2 | EGFR and pan-negative |
| cg10995925 | 6 | 31539601 | LTA       | 2 | EGFR and pan-negative |
| cg17709873 | 6 | 31540456 | LTA       | 2 | EGFR and pan-negative |
| cg04425624 | 6 | 31543565 | TNF       | 2 | EGFR and pan-negative |
| cg21440587 | 6 | 31583458 | AIF1      | 2 | EGFR and pan-negative |
| cg11328149 | 6 | 31689459 | LY6G6C    | 2 | EGFR and pan-negative |
| cg18055007 | 6 | 31698226 | DDAH2     | 2 | EGFR and pan-negative |
| cg12939547 | 6 | 31744037 | VWA7      | 2 | EGFR and pan-negative |
| cg07935151 | 6 | 31774618 | LSM2      | 2 | EGFR and pan-negative |
| cg18424091 | 6 | 31781814 | HSPA1L    | 2 | EGFR and pan-negative |
| cg17384214 | 6 | 31801701 | C6orf48   | 2 | EGFR and pan-negative |
| cg17741572 | 6 | 31914305 | CFB       | 2 | EGFR and pan-negative |
| cg01883966 | 6 | 31938886 | STK19     | 2 | EGFR and pan-negative |
| cg24870273 | 6 | 31938891 | STK19     | 2 | EGFR and pan-negative |
| cg07434278 | 6 | 32006244 | CYP21A2   | 2 | EGFR and pan-negative |
| cg03543593 | 6 | 32076417 | TNXB      | 2 | EGFR and pan-negative |
| cg13035743 | 6 | 32119685 | PRRT1     | 2 | EGFR and pan-negative |
| cg18699916 | 6 | 32133929 | EGFL8     | 2 | EGFR and pan-negative |
| cg05973262 | 6 | 32191895 | NOTCH4    | 2 | EGFR and pan-negative |
| cg09748960 | 6 | 32374926 | BTNL2     | 2 | EGFR and pan-negative |
| cg25764570 | 6 | 32407289 | HLA-DRA   | 2 | EGFR and pan-negative |
| cg19248557 | 6 | 32407838 | HLA-DRA   | 2 | EGFR and pan-negative |
| cg10746737 | 6 | 32498604 | HLA-DRB5  | 2 | EGFR and pan-negative |
| cg01889448 | 6 | 32635871 | HLA-DQB1  | 2 | EGFR and pan-negative |
| cg04345908 | 6 | 32731327 | HLA-DQB2  | 2 | EGFR and pan-negative |
| cg16899306 | 6 | 32732585 | HLA-DQB2  | 2 | EGFR and pan-negative |
| cg04576021 | 6 | 32784255 | HLA-DOB   | 2 | EGFR and pan-negative |
| cg00575744 | 6 | 32908642 | HLA-DMB   | 2 | EGFR and pan-negative |
| cg10714284 | 6 | 32908901 | HLA-DMB   | 2 | EGFR and pan-negative |
| cg24421410 | 6 | 32920220 | HLA-DMA   | 2 | EGFR and pan-negative |
| cg12365667 | 6 | 33043976 | HLA-DPB1  | 2 | EGFR and pan-negative |
| cg10143146 | 6 | 33161377 | COL11A2   | 2 | EGFR and pan-negative |
| cg10940418 | 6 | 33167305 | RXR8      | 2 | EGFR and pan-negative |
| cg10301967 | 6 | 33240022 | RPS18     | 2 | EGFR and pan-negative |
| cg04329454 | 6 | 33561099 | LINC00336 | 2 | EGFR and pan-negative |
| cg08301503 | 6 | 33561188 | LINC00336 | 2 | EGFR and pan-negative |
| cg01962826 | 6 | 34100967 | GRM4      | 2 | EGFR and pan-negative |
| cg26424956 | 6 | 34101526 | GRM4      | 2 | EGFR and pan-negative |
| cg23239444 | 6 | 34433320 | PACSIN1   | 2 | EGFR and pan-negative |
| cg23043245 | 6 | 34434076 | PACSIN1   | 2 | EGFR and pan-negative |
| cg07705908 | 6 | 34523925 | SPDEF     | 2 | EGFR and pan-negative |
| cg17240454 | 6 | 34524278 | SPDEF     | 2 | EGFR and pan-negative |
| cg22407458 | 6 | 35109121 | TCP11     | 2 | EGFR and pan-negative |
| cg21604042 | 6 | 35181401 | SCUBE3    | 2 | EGFR and pan-negative |
| cg00347904 | 6 | 35182508 | SCUBE3    | 2 | EGFR and pan-negative |
| cg06656924 | 6 | 35228319 | ZNF76     | 2 | EGFR and pan-negative |
| cg21712685 | 6 | 35744605 | CLPSL2    | 2 | EGFR and pan-negative |
| cg25107791 | 6 | 35764958 | CLPS      | 2 | EGFR and pan-negative |
| cg11529128 | 6 | 35772890 | LHFPL5    | 2 | EGFR and pan-negative |
| cg15674432 | 6 | 35992082 | SLC26A8   | 2 | EGFR and pan-negative |
| cg05216141 | 6 | 36354960 | ETV7      | 2 | EGFR and pan-negative |
| cg04289385 | 6 | 36355825 | ETV7      | 2 | EGFR and pan-negative |
| cg20951539 | 6 | 36367819 | PXT1      | 2 | EGFR and pan-negative |
| cg03714916 | 6 | 36645886 | CDKN1A    | 2 | EGFR and pan-negative |
| cg01907837 | 6 | 37321337 | RNF8      | 2 | EGFR and pan-negative |
| cg25014318 | 6 | 39016776 | GLP1R     | 2 | EGFR and pan-negative |
| cg02128567 | 6 | 39196998 | KCNK5     | 2 | EGFR and pan-negative |
| cg08315770 | 6 | 39281885 | KCNK17    | 2 | EGFR and pan-negative |
| cg01669948 | 6 | 39290877 | KCNK16    | 2 | EGFR and pan-negative |
| cg18191162 | 6 | 39693228 | KIF6      | 2 | EGFR and pan-negative |
| cg01985396 | 6 | 39760833 | DAAM2     | 2 | EGFR and pan-negative |
| cg25366404 | 6 | 39895360 | MOCS1     | 2 | EGFR and pan-negative |
| cg20095587 | 6 | 41130718 | TREM2     | 2 | EGFR and pan-negative |
| cg02762689 | 6 | 42163422 | GUCA1B    | 2 | EGFR and pan-negative |
| cg14378057 | 6 | 42788563 | GLTSCR1L  | 2 | EGFR and pan-negative |
| cg23696834 | 6 | 42928345 | GNMT      | 2 | EGFR and pan-negative |
| cg24101359 | 6 | 42928495 | GNMT      | 2 | EGFR and pan-negative |
| cg14338887 | 6 | 42928500 | GNMT      | 2 | EGFR and pan-negative |
| cg24751129 | 6 | 42928920 | GNMT      | 2 | EGFR and pan-negative |

|            |   |           |           |   |                       |
|------------|---|-----------|-----------|---|-----------------------|
| cg13678049 | 6 | 43149356  | CUL9      | 2 | EGFR and pan-negative |
| cg24922992 | 6 | 43265547  | SLC22A7   | 2 | EGFR and pan-negative |
| cg16465769 | 6 | 43266151  | SLC22A7   | 2 | EGFR and pan-negative |
| cg11378686 | 6 | 43336278  | ZNF318    | 2 | EGFR and pan-negative |
| cg25545088 | 6 | 43398446  | ABCC10    | 2 | EGFR and pan-negative |
| cg01344171 | 6 | 43612647  | RSPH9     | 2 | EGFR and pan-negative |
| cg04600618 | 6 | 43612980  | RSPH9     | 2 | EGFR and pan-negative |
| cg01993576 | 6 | 44187674  | SLC29A1   | 2 | EGFR and pan-negative |
| cg00775197 | 6 | 44265054  | TCTE1     | 2 | EGFR and pan-negative |
| cg22970435 | 6 | 44310228  | SPATS1    | 2 | EGFR and pan-negative |
| cg05010967 | 6 | 44310640  | SPATS1    | 2 | EGFR and pan-negative |
| cg17142149 | 6 | 46293016  | RCAN2     | 2 | EGFR and pan-negative |
| cg18630040 | 6 | 46702983  | PLA2G7    | 2 | EGFR and pan-negative |
| cg14045072 | 6 | 46884362  | GPR116    | 2 | EGFR and pan-negative |
| cg18841952 | 6 | 47652462  | GPR111    | 2 | EGFR and pan-negative |
| cg19862344 | 6 | 49605181  | RHAG      | 2 | EGFR and pan-negative |
| cg06403553 | 6 | 49754848  | PGK2      | 2 | EGFR and pan-negative |
| cg09299388 | 6 | 49755190  | PGK2      | 2 | EGFR and pan-negative |
| cg15435730 | 6 | 50680222  | TFAP2D    | 2 | EGFR and pan-negative |
| cg19404832 | 6 | 50681114  | TFAP2D    | 2 | EGFR and pan-negative |
| cg09871043 | 6 | 51952361  | PKHD1     | 2 | EGFR and pan-negative |
| cg27168844 | 6 | 52051317  | IL17A     | 2 | EGFR and pan-negative |
| cg04063348 | 6 | 52109347  | IL17F     | 2 | EGFR and pan-negative |
| cg04340502 | 6 | 52775209  | GSTA3     | 2 | EGFR and pan-negative |
| cg12397274 | 6 | 54172183  | TINAG     | 2 | EGFR and pan-negative |
| cg27090087 | 6 | 54172378  | TINAG     | 2 | EGFR and pan-negative |
| cg13948987 | 6 | 55039259  | HCRTR2    | 2 | EGFR and pan-negative |
| cg04452713 | 6 | 56707687  | DST       | 2 | EGFR and pan-negative |
| cg18239753 | 6 | 62995963  | KHDRBS2   | 2 | EGFR and pan-negative |
| cg07465609 | 6 | 66205227  | EYS       | 2 | EGFR and pan-negative |
| cg10244047 | 6 | 69346114  | BAI3      | 2 | EGFR and pan-negative |
| cg06321883 | 6 | 70576541  | COL19A1   | 2 | EGFR and pan-negative |
| cg15045441 | 6 | 72130432  | LINC00472 | 2 | EGFR and pan-negative |
| cg25141674 | 6 | 72130689  | LINC00472 | 2 | EGFR and pan-negative |
| cg19339848 | 6 | 74170937  | MTO1      | 2 | EGFR and pan-negative |
| cg08009622 | 6 | 75916327  | COL12A1   | 2 | EGFR and pan-negative |
| cg10447080 | 6 | 76203225  | FILIP1    | 2 | EGFR and pan-negative |
| cg25763788 | 6 | 78172950  | HTR1B     | 2 | EGFR and pan-negative |
| cg08614481 | 6 | 78173250  | HTR1B     | 2 | EGFR and pan-negative |
| cg15331039 | 6 | 80341283  | SH3BGRL2  | 2 | EGFR and pan-negative |
| cg19439399 | 6 | 80656595  | ELOVL4    | 2 | EGFR and pan-negative |
| cg13297865 | 6 | 80657415  | ELOVL4    | 2 | EGFR and pan-negative |
| cg21688264 | 6 | 84418724  | SNAP91    | 2 | EGFR and pan-negative |
| cg26384034 | 6 | 84744055  | MRAP2     | 2 | EGFR and pan-negative |
| cg04278702 | 6 | 87647399  | HTR1E     | 2 | EGFR and pan-negative |
| cg07981495 | 6 | 87804765  | CGA       | 2 | EGFR and pan-negative |
| cg24276445 | 6 | 88854953  | CNR1      | 2 | EGFR and pan-negative |
| cg23276695 | 6 | 88855716  | CNR1      | 2 | EGFR and pan-negative |
| cg00333528 | 6 | 89927485  | GABRR1    | 2 | EGFR and pan-negative |
| cg08947964 | 6 | 90603803  | GJA10     | 2 | EGFR and pan-negative |
| cg00044245 | 6 | 94128889  | EPHA7     | 2 | EGFR and pan-negative |
| cg08001895 | 6 | 94129582  | EPHA7     | 2 | EGFR and pan-negative |
| cg01837719 | 6 | 96463185  | FUT9      | 2 | EGFR and pan-negative |
| cg23978322 | 6 | 97010439  | FHL5      | 2 | EGFR and pan-negative |
| cg26174752 | 6 | 97285948  | GPR63     | 2 | EGFR and pan-negative |
| cg14823162 | 6 | 99281628  | POU3F2    | 2 | EGFR and pan-negative |
| cg22026853 | 6 | 99282887  | POU3F2    | 2 | EGFR and pan-negative |
| cg24831427 | 6 | 99842353  | COQ3      | 2 | EGFR and pan-negative |
| cg20134215 | 6 | 100441407 | LOC728012 | 2 | EGFR and pan-negative |
| cg20624391 | 6 | 105584149 | BVES      | 2 | EGFR and pan-negative |
| cg07476030 | 6 | 107078648 | QRSL1     | 2 | EGFR and pan-negative |
| cg03874127 | 6 | 109169135 | ARMC2     | 2 | EGFR and pan-negative |
| cg01500097 | 6 | 110011156 | AK9       | 2 | EGFR and pan-negative |
| cg20011134 | 6 | 110736422 | DDO       | 2 | EGFR and pan-negative |
| cg22334665 | 6 | 110797497 | SLC22A16  | 2 | EGFR and pan-negative |
| cg05449607 | 6 | 111279612 | GTF3C6    | 2 | EGFR and pan-negative |
| cg26904406 | 6 | 111927312 | TRAF3IP2  | 2 | EGFR and pan-negative |
| cg19118533 | 6 | 111927323 | TRAF3IP2  | 2 | EGFR and pan-negative |
| cg20985014 | 6 | 112374151 | WISP3     | 2 | EGFR and pan-negative |
| cg10525372 | 6 | 112375333 | WISP3     | 2 | EGFR and pan-negative |
| cg08897388 | 6 | 112575705 | LAMA4     | 2 | EGFR and pan-negative |
| cg14289461 | 6 | 112575929 | LAMA4     | 2 | EGFR and pan-negative |
| cg19815376 | 6 | 114225306 | FLJ34503  | 2 | EGFR and pan-negative |
| cg16176600 | 6 | 116381609 | FRK       | 2 | EGFR and pan-negative |
| cg09025324 | 6 | 116691685 | DSE       | 2 | EGFR and pan-negative |
| cg22419732 | 6 | 116832047 | FAM26E    | 2 | EGFR and pan-negative |
| cg03003256 | 6 | 116849557 | FAM26D    | 2 | EGFR and pan-negative |
| cg25423576 | 6 | 117197952 | RFX6      | 2 | EGFR and pan-negative |
| cg20979799 | 6 | 117198560 | RFX6      | 2 | EGFR and pan-negative |
| cg11191210 | 6 | 117585815 | VGLL2     | 2 | EGFR and pan-negative |
| cg21166999 | 6 | 117746793 | ROS1      | 2 | EGFR and pan-negative |
| cg04183425 | 6 | 119221279 | ASF1A     | 2 | EGFR and pan-negative |
| cg18555555 | 6 | 123099534 | FABP7     | 2 | EGFR and pan-negative |
| cg05798712 | 6 | 123100907 | FABP7     | 2 | EGFR and pan-negative |
| cg19478478 | 6 | 123957927 | TRDN      | 2 | EGFR and pan-negative |
| cg14462830 | 6 | 123959184 | TRDN      | 2 | EGFR and pan-negative |
| cg21787291 | 6 | 124125170 | NKAIN2    | 2 | EGFR and pan-negative |
| cg20034100 | 6 | 125304496 | RNF217    | 2 | EGFR and pan-negative |
| cg24298280 | 6 | 125305108 | RNF217    | 2 | EGFR and pan-negative |
| cg01868782 | 6 | 126071099 | HEY2      | 2 | EGFR and pan-negative |
| cg12148919 | 6 | 128841705 | PTPRK     | 2 | EGFR and pan-negative |
| cg15381769 | 6 | 128841972 | PTPRK     | 2 | EGFR and pan-negative |
| cg20640433 | 6 | 129204206 | LAMA2     | 2 | EGFR and pan-negative |
| cg19774122 | 6 | 129204622 | LAMA2     | 2 | EGFR and pan-negative |
| cg18172186 | 6 | 130758314 | TMEM200A  | 2 | EGFR and pan-negative |

|            |   |           |              |   |                       |
|------------|---|-----------|--------------|---|-----------------------|
| cg25488021 | 6 | 131277447 | EPB41L2      | 2 | EGFR and pan-negative |
| cg11386709 | 6 | 131278559 | EPB41L2      | 2 | EGFR and pan-negative |
| cg08678755 | 6 | 131957011 | ENPP3        | 2 | EGFR and pan-negative |
| cg17026542 | 6 | 132022490 | OR2A4        | 2 | EGFR and pan-negative |
| cg24311382 | 6 | 132272408 | CTGF         | 2 | EGFR and pan-negative |
| cg23887102 | 6 | 132891034 | TAAR6        | 2 | EGFR and pan-negative |
| cg17829936 | 6 | 132910681 | TAAR5        | 2 | EGFR and pan-negative |
| cg21296676 | 6 | 133561660 | EYA4         | 2 | EGFR and pan-negative |
| cg07327468 | 6 | 133561765 | EYA4         | 2 | EGFR and pan-negative |
| cg20330472 | 6 | 133561932 | EYA4         | 2 | EGFR and pan-negative |
| cg20286200 | 6 | 133562267 | EYA4         | 2 | EGFR and pan-negative |
| cg01401376 | 6 | 133563342 | EYA4         | 2 | EGFR and pan-negative |
| cg01805282 | 6 | 133563764 | EYA4         | 2 | EGFR and pan-negative |
| cg09533063 | 6 | 135271589 | ALDH8A1      | 2 | EGFR and pan-negative |
| cg18253802 | 6 | 135501780 | MYB          | 2 | EGFR and pan-negative |
| cg02664205 | 6 | 136171652 | PDE7B        | 2 | EGFR and pan-negative |
| cg15804973 | 6 | 137114513 | MAP3K5       | 2 | EGFR and pan-negative |
| cg22487322 | 6 | 137366322 | IL20RA       | 2 | EGFR and pan-negative |
| cg26112901 | 6 | 137494988 | IL22RA2      | 2 | EGFR and pan-negative |
| cg03889226 | 6 | 137815333 | OLIG3        | 2 | EGFR and pan-negative |
| cg06918467 | 6 | 137815539 | OLIG3        | 2 | EGFR and pan-negative |
| cg17480438 | 6 | 138528677 | KIAA1244     | 2 | EGFR and pan-negative |
| cg02500392 | 6 | 138539372 | PBOV1        | 2 | EGFR and pan-negative |
| cg19823847 | 6 | 138539706 | PBOV1        | 2 | EGFR and pan-negative |
| cg17256157 | 6 | 142410100 | NMBR         | 2 | EGFR and pan-negative |
| cg22858308 | 6 | 143095613 | HIVEP2       | 2 | EGFR and pan-negative |
| cg02885771 | 6 | 144163654 | LTV1         | 2 | EGFR and pan-negative |
| cg13722123 | 6 | 146350346 | GRM1         | 2 | EGFR and pan-negative |
| cg06015218 | 6 | 146350434 | GRM1         | 2 | EGFR and pan-negative |
| cg23833452 | 6 | 146864752 | RAB32        | 2 | EGFR and pan-negative |
| cg04113075 | 6 | 146865487 | RAB32        | 2 | EGFR and pan-negative |
| cg05360265 | 6 | 147525477 | STXBP5       | 2 | EGFR and pan-negative |
| cg26675382 | 6 | 150067846 | NUP43        | 2 | EGFR and pan-negative |
| cg12232274 | 6 | 150185854 | LRP11        | 2 | EGFR and pan-negative |
| cg12213910 | 6 | 150211211 | LOC100652739 | 2 | EGFR and pan-negative |
| cg19979896 | 6 | 150212118 | RAET1E       | 2 | EGFR and pan-negative |
| cg20134151 | 6 | 150463500 | PPP1R14C     | 2 | EGFR and pan-negative |
| cg12061236 | 6 | 151560886 | AKAP12       | 2 | EGFR and pan-negative |
| cg01555431 | 6 | 151562026 | AKAP12       | 2 | EGFR and pan-negative |
| cg20627916 | 6 | 152128328 | ESR1         | 2 | EGFR and pan-negative |
| cg15626350 | 6 | 152130207 | ESR1         | 2 | EGFR and pan-negative |
| cg26620959 | 6 | 152958489 | SYNE1        | 2 | EGFR and pan-negative |
| cg22719623 | 6 | 154360732 | OPRM1        | 2 | EGFR and pan-negative |
| cg10601168 | 6 | 154831192 | CNKSR3       | 2 | EGFR and pan-negative |
| cg20919556 | 6 | 154832050 | CNKSR3       | 2 | EGFR and pan-negative |
| cg09837169 | 6 | 155410740 | TIAM2        | 2 | EGFR and pan-negative |
| cg17306637 | 6 | 155584709 | CLDN20       | 2 | EGFR and pan-negative |
| cg13645811 | 6 | 158403520 | SYNJ2        | 2 | EGFR and pan-negative |
| cg06659073 | 6 | 158589307 | SERAC1       | 2 | EGFR and pan-negative |
| cg11456838 | 6 | 159278754 | OSTCP1       | 2 | EGFR and pan-negative |
| cg05262335 | 6 | 159466062 | TAGAP        | 2 | EGFR and pan-negative |
| cg13126790 | 6 | 160010346 | 0            | 2 | EGFR and pan-negative |
| cg08784110 | 6 | 160328002 | MAS1         | 2 | EGFR and pan-negative |
| cg27292431 | 6 | 160543261 | SLC22A1      | 2 | EGFR and pan-negative |
| cg19561774 | 6 | 160679690 | SLC22A2      | 2 | EGFR and pan-negative |
| cg06236276 | 6 | 160680078 | SLC22A2      | 2 | EGFR and pan-negative |
| cg07237939 | 6 | 160769754 | SLC22A3      | 2 | EGFR and pan-negative |
| cg09087901 | 6 | 161123803 | PLG          | 2 | EGFR and pan-negative |
| cg07074571 | 6 | 161695561 | AGPAT4       | 2 | EGFR and pan-negative |
| cg02064106 | 6 | 165722858 | C6orf118     | 2 | EGFR and pan-negative |
| cg05799317 | 6 | 165723796 | C6orf118     | 2 | EGFR and pan-negative |
| cg24133115 | 6 | 166075520 | PDE10A       | 2 | EGFR and pan-negative |
| cg01431114 | 6 | 166076971 | PDE10A       | 2 | EGFR and pan-negative |
| cg17188046 | 6 | 166582197 | T            | 2 | EGFR and pan-negative |
| cg13217373 | 6 | 167275395 | RPS6KA2      | 2 | EGFR and pan-negative |
| cg14839257 | 6 | 167275999 | RPS6KA2      | 2 | EGFR and pan-negative |
| cg14479329 | 6 | 167370587 | RNASET2      | 2 | EGFR and pan-negative |
| cg05824215 | 6 | 167536046 | CCR6         | 2 | EGFR and pan-negative |
| cg22182975 | 6 | 167571172 | GPR31        | 2 | EGFR and pan-negative |
| cg21970438 | 6 | 167738277 | TLL2         | 2 | EGFR and pan-negative |
| cg12215675 | 6 | 167738594 | TLL2         | 2 | EGFR and pan-negative |
| cg13954572 | 6 | 167798544 | TCP10        | 2 | EGFR and pan-negative |
| cg09214254 | 6 | 168841455 | SMOC2        | 2 | EGFR and pan-negative |
| cg11612345 | 6 | 168842491 | SMOC2        | 2 | EGFR and pan-negative |
| cg21652958 | 6 | 169653961 | THBS2        | 2 | EGFR and pan-negative |
| cg13577076 | 7 | 752456    | PRKAR1B      | 2 | EGFR and pan-negative |
| cg22972055 | 7 | 872293    | SUN1         | 2 | EGFR and pan-negative |
| cg06942110 | 7 | 1545385   | INTS1        | 2 | EGFR and pan-negative |
| cg18896687 | 7 | 1571125   | MAFK         | 2 | EGFR and pan-negative |
| cg03862760 | 7 | 1609483   | PSMG3        | 2 | EGFR and pan-negative |
| cg22679120 | 7 | 2353402   | SNX8         | 2 | EGFR and pan-negative |
| cg21349901 | 7 | 4630518   | 0            | 2 | EGFR and pan-negative |
| cg06914598 | 7 | 5085121   | RBAK         | 2 | EGFR and pan-negative |
| cg01870826 | 7 | 5111875   | RBAKDN       | 2 | EGFR and pan-negative |
| cg08496998 | 7 | 5822206   | RNF216       | 2 | EGFR and pan-negative |
| cg27221338 | 7 | 6525025   | KDEL2        | 2 | EGFR and pan-negative |
| cg15240064 | 7 | 6746837   | ZNF12        | 2 | EGFR and pan-negative |
| cg00053647 | 7 | 6866072   | CCZ1B        | 2 | EGFR and pan-negative |
| cg09259772 | 7 | 12726089  | ARL4A        | 2 | EGFR and pan-negative |
| cg13140740 | 7 | 12726553  | ARL4A        | 2 | EGFR and pan-negative |
| cg00003994 | 7 | 15725862  | MEOX2        | 2 | EGFR and pan-negative |
| cg13047892 | 7 | 15726649  | MEOX2        | 2 | EGFR and pan-negative |
| cg25533774 | 7 | 16505409  | SOSTDC1      | 2 | EGFR and pan-negative |
| cg06363129 | 7 | 16505602  | SOSTDC1      | 2 | EGFR and pan-negative |
| cg21201572 | 7 | 16844606  | AGR2         | 2 | EGFR and pan-negative |

|            |   |          |              |   |                       |
|------------|---|----------|--------------|---|-----------------------|
| cg24426405 | 7 | 16844852 | AGR2         | 2 | EGFR and pan-negative |
| cg21041127 | 7 | 16922421 | AGR3         | 2 | EGFR and pan-negative |
| cg12081743 | 7 | 18535499 | HDAC9        | 2 | EGFR and pan-negative |
| cg20052718 | 7 | 19156902 | TWIST1       | 2 | EGFR and pan-negative |
| cg24446548 | 7 | 19157263 | TWIST1       | 2 | EGFR and pan-negative |
| cg00240432 | 7 | 19157296 | TWIST1       | 2 | EGFR and pan-negative |
| cg22498251 | 7 | 19157710 | TWIST1       | 2 | EGFR and pan-negative |
| cg11241627 | 7 | 19185165 | FERD3L       | 2 | EGFR and pan-negative |
| cg17864730 | 7 | 20370899 | ITGB8        | 2 | EGFR and pan-negative |
| cg20377955 | 7 | 20827825 | SP8          | 2 | EGFR and pan-negative |
| cg17274742 | 7 | 23286539 | GNPMB        | 2 | EGFR and pan-negative |
| cg05158615 | 7 | 24323559 | NPY          | 2 | EGFR and pan-negative |
| cg14984920 | 7 | 25164393 | CYCS         | 2 | EGFR and pan-negative |
| cg12686016 | 7 | 27135477 | HOXA1        | 2 | EGFR and pan-negative |
| cg03700462 | 7 | 27135684 | HOTAIRM1     | 2 | EGFR and pan-negative |
| cg02248486 | 7 | 27183196 | HOXA5        | 2 | EGFR and pan-negative |
| cg00518911 | 7 | 27221304 | HOXA10-HOXA9 | 2 | EGFR and pan-negative |
| cg06397837 | 7 | 27240251 | HOTTIP       | 2 | EGFR and pan-negative |
| cg18397523 | 7 | 27282351 | EVX1         | 2 | EGFR and pan-negative |
| cg10822172 | 7 | 28338757 | CREB5        | 2 | EGFR and pan-negative |
| cg02611282 | 7 | 28338985 | CREB5        | 2 | EGFR and pan-negative |
| cg24448259 | 7 | 29186110 | CPVL         | 2 | EGFR and pan-negative |
| cg03054529 | 7 | 30029938 | SCRN1        | 2 | EGFR and pan-negative |
| cg08972170 | 7 | 30185776 | C7orf41      | 2 | EGFR and pan-negative |
| cg04922810 | 7 | 30721888 | CRHR2        | 2 | EGFR and pan-negative |
| cg14896516 | 7 | 30722361 | CRHR2        | 2 | EGFR and pan-negative |
| cg18589624 | 7 | 30791294 | INMT-FAM188B | 2 | EGFR and pan-negative |
| cg04749372 | 7 | 30791871 | INMT         | 2 | EGFR and pan-negative |
| cg20176648 | 7 | 30951064 | AQP1         | 2 | EGFR and pan-negative |
| cg04551925 | 7 | 30951740 | AQP1         | 2 | EGFR and pan-negative |
| cg27076139 | 7 | 31091718 | ADCYAP1R1    | 2 | EGFR and pan-negative |
| cg01353448 | 7 | 31726912 | PPP1R17      | 2 | EGFR and pan-negative |
| cg22131691 | 7 | 32110988 | PDE1C        | 2 | EGFR and pan-negative |
| cg17786776 | 7 | 32996145 | FKBP9        | 2 | EGFR and pan-negative |
| cg10073723 | 7 | 33944213 | BMPER        | 2 | EGFR and pan-negative |
| cg17561435 | 7 | 33944927 | BMPER        | 2 | EGFR and pan-negative |
| cg14401837 | 7 | 34697493 | NPSR1        | 2 | EGFR and pan-negative |
| cg06466797 | 7 | 35735019 | HERPUD2      | 2 | EGFR and pan-negative |
| cg25028542 | 7 | 36429120 | ANLN         | 2 | EGFR and pan-negative |
| cg19118812 | 7 | 37488438 | ELMO1        | 2 | EGFR and pan-negative |
| cg08453021 | 7 | 37488575 | ELMO1        | 2 | EGFR and pan-negative |
| cg24995381 | 7 | 37780156 | GPR141       | 2 | EGFR and pan-negative |
| cg15028436 | 7 | 37888078 | NME8         | 2 | EGFR and pan-negative |
| cg20019546 | 7 | 37955824 | SFRP4        | 2 | EGFR and pan-negative |
| cg12515638 | 7 | 37956018 | SFRP4        | 2 | EGFR and pan-negative |
| cg08261094 | 7 | 37956276 | SFRP4        | 2 | EGFR and pan-negative |
| cg27641018 | 7 | 37959755 | EPDR1        | 2 | EGFR and pan-negative |
| cg07512517 | 7 | 38408106 | LOC100506776 | 2 | EGFR and pan-negative |
| cg10293925 | 7 | 38670985 | AMPH         | 2 | EGFR and pan-negative |
| cg22284975 | 7 | 40174843 | C7orf10      | 2 | EGFR and pan-negative |
| cg17530977 | 7 | 42275872 | GLI3         | 2 | EGFR and pan-negative |
| cg17628717 | 7 | 43351208 | HECW1        | 2 | EGFR and pan-negative |
| cg17571291 | 7 | 43797787 | BLVRA        | 2 | EGFR and pan-negative |
| cg15262984 | 7 | 43965648 | URGCP        | 2 | EGFR and pan-negative |
| cg22222251 | 7 | 44039076 | SPDYE1       | 2 | EGFR and pan-negative |
| cg06852744 | 7 | 44142973 | AEBP1        | 2 | EGFR and pan-negative |
| cg02126753 | 7 | 44143998 | AEBP1        | 2 | EGFR and pan-negative |
| cg23370883 | 7 | 44180604 | MYL7         | 2 | EGFR and pan-negative |
| cg01708964 | 7 | 44181791 | MYL7         | 2 | EGFR and pan-negative |
| cg07944811 | 7 | 44228830 | GCK          | 2 | EGFR and pan-negative |
| cg06905514 | 7 | 44364941 | CAMK2B       | 2 | EGFR and pan-negative |
| cg07408740 | 7 | 44645306 | OGDH         | 2 | EGFR and pan-negative |
| cg02417264 | 7 | 45197727 | RAMP3        | 2 | EGFR and pan-negative |
| cg13523557 | 7 | 45613725 | ADCY1        | 2 | EGFR and pan-negative |
| cg07651242 | 7 | 45614720 | ADCY1        | 2 | EGFR and pan-negative |
| cg15898840 | 7 | 45960834 | IGFBP3       | 2 | EGFR and pan-negative |
| cg04796162 | 7 | 45961102 | IGFBP3       | 2 | EGFR and pan-negative |
| cg24499411 | 7 | 47580247 | TNS3         | 2 | EGFR and pan-negative |
| cg27094076 | 7 | 50132541 | ZPBP         | 2 | EGFR and pan-negative |
| cg27183007 | 7 | 50132975 | ZPBP         | 2 | EGFR and pan-negative |
| cg05072008 | 7 | 50518647 | FIGNL1       | 2 | EGFR and pan-negative |
| cg04144768 | 7 | 50628154 | DDC          | 2 | EGFR and pan-negative |
| cg03843951 | 7 | 50629634 | DDC          | 2 | EGFR and pan-negative |
| cg03104936 | 7 | 50849168 | GRB10        | 2 | EGFR and pan-negative |
| cg06790324 | 7 | 50860564 | GRB10        | 2 | EGFR and pan-negative |
| cg06386517 | 7 | 50860866 | GRB10        | 2 | EGFR and pan-negative |
| cg24302095 | 7 | 50861049 | GRB10        | 2 | EGFR and pan-negative |
| cg20651681 | 7 | 50861418 | GRB10        | 2 | EGFR and pan-negative |
| cg15774495 | 7 | 50861549 | GRB10        | 2 | EGFR and pan-negative |
| cg26163537 | 7 | 50861592 | GRB10        | 2 | EGFR and pan-negative |
| cg15164958 | 7 | 54609587 | VSTM2A       | 2 | EGFR and pan-negative |
| cg14094960 | 7 | 55086890 | EGFR         | 2 | EGFR and pan-negative |
| cg27270684 | 7 | 55757158 | FKBP9L       | 2 | EGFR and pan-negative |
| cg08489623 | 7 | 55902220 | 42627        | 2 | EGFR and pan-negative |
| cg23839680 | 7 | 56118238 | PSPH         | 2 | EGFR and pan-negative |
| cg12555334 | 7 | 56120290 | CCT6A        | 2 | EGFR and pan-negative |
| cg00245878 | 7 | 64450875 | ZNF117       | 2 | EGFR and pan-negative |
| cg14517922 | 7 | 65889460 | 0            | 2 | EGFR and pan-negative |
| cg01366419 | 7 | 70597091 | WBSCR17      | 2 | EGFR and pan-negative |
| cg21003606 | 7 | 71877237 | CALN1        | 2 | EGFR and pan-negative |
| cg11828089 | 7 | 71878121 | CALN1        | 2 | EGFR and pan-negative |
| cg03882305 | 7 | 72439946 | LOC541473    | 2 | EGFR and pan-negative |
| cg21942546 | 7 | 73154357 | ABHD11       | 2 | EGFR and pan-negative |
| cg15544036 | 7 | 73245564 | CLDN4        | 2 | EGFR and pan-negative |
| cg27360098 | 7 | 73442480 | ELN          | 2 | EGFR and pan-negative |

|            |   |           |           |   |                       |
|------------|---|-----------|-----------|---|-----------------------|
| cg05822532 | 7 | 73442531  | ELN       | 2 | EGFR and pan-negative |
| cg05592398 | 7 | 73497778  | LIMK1     | 2 | EGFR and pan-negative |
| cg05163588 | 7 | 73498778  | LIMK1     | 2 | EGFR and pan-negative |
| cg03375002 | 7 | 73623876  | LAT2      | 2 | EGFR and pan-negative |
| cg01318557 | 7 | 73624319  | LAT2      | 2 | EGFR and pan-negative |
| cg08695830 | 7 | 73703459  | CLIP2     | 2 | EGFR and pan-negative |
| cg21265783 | 7 | 73704324  | CLIP2     | 2 | EGFR and pan-negative |
| cg12240237 | 7 | 73946402  | GTF2IRD1  | 2 | EGFR and pan-negative |
| cg25770411 | 7 | 73946901  | GTF2IRD1  | 2 | EGFR and pan-negative |
| cg05556717 | 7 | 75419304  | CCL26     | 2 | EGFR and pan-negative |
| cg17412351 | 7 | 75678396  | MDH2      | 2 | EGFR and pan-negative |
| cg13594711 | 7 | 76038785  | SRCRB4D   | 2 | EGFR and pan-negative |
| cg12271671 | 7 | 76829059  | FGL2      | 2 | EGFR and pan-negative |
| cg05902852 | 7 | 79082393  | MAGI2-AS3 | 2 | EGFR and pan-negative |
| cg04008901 | 7 | 82072779  | CACNA2D1  | 2 | EGFR and pan-negative |
| cg06379754 | 7 | 82073573  | CACNA2D1  | 2 | EGFR and pan-negative |
| cg08274234 | 7 | 83277971  | SEMA3E    | 2 | EGFR and pan-negative |
| cg14724613 | 7 | 86273429  | GRM3      | 2 | EGFR and pan-negative |
| cg18655915 | 7 | 87109799  | 0         | 2 | EGFR and pan-negative |
| cg01795161 | 7 | 87506981  | SLC25A40  | 2 | EGFR and pan-negative |
| cg16639595 | 7 | 87856984  | SRI       | 2 | EGFR and pan-negative |
| cg23219720 | 7 | 88388555  | ZNF804B   | 2 | EGFR and pan-negative |
| cg27319898 | 7 | 88389003  | ZNF804B   | 2 | EGFR and pan-negative |
| cg09450020 | 7 | 89841435  | STEAP2    | 2 | EGFR and pan-negative |
| cg04992673 | 7 | 92848714  | HEPACAM2  | 2 | EGFR and pan-negative |
| cg23239396 | 7 | 93203695  | CALCR     | 2 | EGFR and pan-negative |
| cg22799321 | 7 | 93519621  | TFPI2     | 2 | EGFR and pan-negative |
| cg23141855 | 7 | 93519892  | TFPI2     | 2 | EGFR and pan-negative |
| cg23686014 | 7 | 93519924  | TFPI2     | 2 | EGFR and pan-negative |
| cg18511007 | 7 | 94023822  | COL1A2    | 2 | EGFR and pan-negative |
| cg19781251 | 7 | 94294278  | PEG10     | 2 | EGFR and pan-negative |
| cg15544721 | 7 | 94536691  | PPP1R9A   | 2 | EGFR and pan-negative |
| cg11164400 | 7 | 94536787  | PPP1R9A   | 2 | EGFR and pan-negative |
| cg19221959 | 7 | 94537347  | PPP1R9A   | 2 | EGFR and pan-negative |
| cg07404485 | 7 | 94953653  | PON1      | 2 | EGFR and pan-negative |
| cg25692621 | 7 | 95115163  | ASB4      | 2 | EGFR and pan-negative |
| cg26847490 | 7 | 95115289  | ASB4      | 2 | EGFR and pan-negative |
| cg11554605 | 7 | 95115354  | ASB4      | 2 | EGFR and pan-negative |
| cg22171829 | 7 | 95225520  | PDK4      | 2 | EGFR and pan-negative |
| cg10281478 | 7 | 95402528  | DYNC111   | 2 | EGFR and pan-negative |
| cg27016494 | 7 | 96651586  | DLX5      | 2 | EGFR and pan-negative |
| cg11500797 | 7 | 96652123  | DLX5      | 2 | EGFR and pan-negative |
| cg24115040 | 7 | 96652375  | DLX5      | 2 | EGFR and pan-negative |
| cg08878323 | 7 | 96652464  | DLX5      | 2 | EGFR and pan-negative |
| cg06911084 | 7 | 96652894  | DLX5      | 2 | EGFR and pan-negative |
| cg09150117 | 7 | 96653867  | DLX5      | 2 | EGFR and pan-negative |
| cg13344740 | 7 | 96654132  | DLX5      | 2 | EGFR and pan-negative |
| cg11997899 | 7 | 96654183  | DLX5      | 2 | EGFR and pan-negative |
| cg01169726 | 7 | 96654425  | DLX5      | 2 | EGFR and pan-negative |
| cg07550362 | 7 | 97361201  | TAC1      | 2 | EGFR and pan-negative |
| cg14221171 | 7 | 97361759  | TAC1      | 2 | EGFR and pan-negative |
| cg14975238 | 7 | 97841591  | BHLHA15   | 2 | EGFR and pan-negative |
| cg12799895 | 7 | 98246652  | NPTX2     | 2 | EGFR and pan-negative |
| cg02798801 | 7 | 99005263  | PDAP1     | 2 | EGFR and pan-negative |
| cg03665605 | 7 | 99064212  | ATP5J2    | 2 | EGFR and pan-negative |
| cg14913925 | 7 | 99149239  | FAM200A   | 2 | EGFR and pan-negative |
| cg23326197 | 7 | 99382370  | CYP3A4    | 2 | EGFR and pan-negative |
| cg12019109 | 7 | 99574383  | AZGP1     | 2 | EGFR and pan-negative |
| cg02540157 | 7 | 99816814  | PVRIG     | 2 | EGFR and pan-negative |
| cg23221013 | 7 | 99817027  | PVRIG     | 2 | EGFR and pan-negative |
| cg12584718 | 7 | 100028402 | MEPCE     | 2 | EGFR and pan-negative |
| cg15547534 | 7 | 100034410 | PPP1R35   | 2 | EGFR and pan-negative |
| cg10240853 | 7 | 100210548 | MOSPD3    | 2 | EGFR and pan-negative |
| cg10681065 | 7 | 100239172 | TFR2      | 2 | EGFR and pan-negative |
| cg17194182 | 7 | 100318154 | EPO       | 2 | EGFR and pan-negative |
| cg08575537 | 7 | 100318626 | EPO       | 2 | EGFR and pan-negative |
| cg08558340 | 7 | 100472263 | SRRT      | 2 | EGFR and pan-negative |
| cg07873488 | 7 | 100662570 | MUC17     | 2 | EGFR and pan-negative |
| cg01584473 | 7 | 100663367 | MUC17     | 2 | EGFR and pan-negative |
| cg02273392 | 7 | 100770414 | SERPINE1  | 2 | EGFR and pan-negative |
| cg08097755 | 7 | 100808488 | VGf       | 2 | EGFR and pan-negative |
| cg19528976 | 7 | 100823280 | NAT16     | 2 | EGFR and pan-negative |
| cg25527547 | 7 | 100862300 | PLOD3     | 2 | EGFR and pan-negative |
| cg02512860 | 7 | 100880751 | CLDN15    | 2 | EGFR and pan-negative |
| cg11513856 | 7 | 100965680 | RABL5     | 2 | EGFR and pan-negative |
| cg02564523 | 7 | 102073539 | ORAI2     | 2 | EGFR and pan-negative |
| cg02724472 | 7 | 102553293 | LRRC17    | 2 | EGFR and pan-negative |
| cg20442697 | 7 | 102553432 | LRRC17    | 2 | EGFR and pan-negative |
| cg09492887 | 7 | 103085978 | SLC26A5   | 2 | EGFR and pan-negative |
| cg10007262 | 7 | 103631219 | RELN      | 2 | EGFR and pan-negative |
| cg18294158 | 7 | 103849187 | ORC5      | 2 | EGFR and pan-negative |
| cg24315860 | 7 | 105029492 | SRPK2     | 2 | EGFR and pan-negative |
| cg04996020 | 7 | 107443898 | SLC26A3   | 2 | EGFR and pan-negative |
| cg22294577 | 7 | 107444728 | SLC26A3   | 2 | EGFR and pan-negative |
| cg24937126 | 7 | 107643285 | LAMB1     | 2 | EGFR and pan-negative |
| cg09837977 | 7 | 110731201 | LRRN3     | 2 | EGFR and pan-negative |
| cg13391638 | 7 | 112430772 | TMEM168   | 2 | EGFR and pan-negative |
| cg00967316 | 7 | 113558794 | PPP1R3A   | 2 | EGFR and pan-negative |
| cg15339605 | 7 | 115670795 | TFEC      | 2 | EGFR and pan-negative |
| cg17469978 | 7 | 116164704 | CAV1      | 2 | EGFR and pan-negative |
| cg14191360 | 7 | 116311773 | MET       | 2 | EGFR and pan-negative |
| cg01830294 | 7 | 116963492 | WNT2      | 2 | EGFR and pan-negative |
| cg15647515 | 7 | 116963802 | WNT2      | 2 | EGFR and pan-negative |
| cg09911342 | 7 | 117067919 | ASZ1      | 2 | EGFR and pan-negative |
| cg25509184 | 7 | 117119382 | CFTR      | 2 | EGFR and pan-negative |

|            |   |           |              |   |                       |
|------------|---|-----------|--------------|---|-----------------------|
| cg27603796 | 7 | 117512803 | CTTNBP2      | 2 | EGFR and pan-negative |
| cg16192029 | 7 | 117864674 | ANKRD7       | 2 | EGFR and pan-negative |
| cg11075556 | 7 | 117865112 | ANKRD7       | 2 | EGFR and pan-negative |
| cg26702254 | 7 | 119912586 | KCND2        | 2 | EGFR and pan-negative |
| cg24849648 | 7 | 120964019 | WNT16        | 2 | EGFR and pan-negative |
| cg14175438 | 7 | 121036729 | FAM3C        | 2 | EGFR and pan-negative |
| cg00826384 | 7 | 121513065 | PTPRZ1       | 2 | EGFR and pan-negative |
| cg12150401 | 7 | 122635522 | TAS2R16      | 2 | EGFR and pan-negative |
| cg15560337 | 7 | 123484898 | HYAL4        | 2 | EGFR and pan-negative |
| cg19292712 | 7 | 123564194 | SPAM1        | 2 | EGFR and pan-negative |
| cg22724153 | 7 | 123565925 | SPAM1        | 2 | EGFR and pan-negative |
| cg21792432 | 7 | 124538660 | POT1         | 2 | EGFR and pan-negative |
| cg02946850 | 7 | 126882944 | GRM8         | 2 | EGFR and pan-negative |
| cg09868882 | 7 | 126883640 | GRM8         | 2 | EGFR and pan-negative |
| cg16514843 | 7 | 127255483 | PAX4         | 2 | EGFR and pan-negative |
| cg08886154 | 7 | 127256676 | PAX4         | 2 | EGFR and pan-negative |
| cg15087147 | 7 | 127672169 | LRRC4        | 2 | EGFR and pan-negative |
| cg19594666 | 7 | 127881280 | LEP          | 2 | EGFR and pan-negative |
| cg24127989 | 7 | 128049508 | IMPDH1       | 2 | EGFR and pan-negative |
| cg10157098 | 7 | 128354967 | FAM71F1      | 2 | EGFR and pan-negative |
| cg11303670 | 7 | 128784442 | TSPAN33      | 2 | EGFR and pan-negative |
| cg04478795 | 7 | 128828120 | SMO          | 2 | EGFR and pan-negative |
| cg01796223 | 7 | 129933014 | CPA4         | 2 | EGFR and pan-negative |
| cg19690404 | 7 | 129933646 | CPA4         | 2 | EGFR and pan-negative |
| cg02855426 | 7 | 129984350 | CPA5         | 2 | EGFR and pan-negative |
| cg14761227 | 7 | 130021088 | CPA1         | 2 | EGFR and pan-negative |
| cg02490034 | 7 | 130125836 | MEST         | 2 | EGFR and pan-negative |
| cg09059945 | 7 | 130126018 | MEST         | 2 | EGFR and pan-negative |
| cg08077673 | 7 | 130126368 | MEST         | 2 | EGFR and pan-negative |
| cg07427065 | 7 | 130130596 | MESTT1       | 2 | EGFR and pan-negative |
| cg04528819 | 7 | 130418315 | KLF14        | 2 | EGFR and pan-negative |
| cg06533629 | 7 | 130419370 | KLF14        | 2 | EGFR and pan-negative |
| cg24469977 | 7 | 132333391 | PLXNA4       | 2 | EGFR and pan-negative |
| cg10839521 | 7 | 133811911 | LRGUK        | 2 | EGFR and pan-negative |
| cg18416881 | 7 | 134143823 | AKR1B1       | 2 | EGFR and pan-negative |
| cg13801416 | 7 | 134143919 | AKR1B1       | 2 | EGFR and pan-negative |
| cg02382666 | 7 | 134463454 | CALD1        | 2 | EGFR and pan-negative |
| cg24956866 | 7 | 134464129 | CALD1        | 2 | EGFR and pan-negative |
| cg14009688 | 7 | 134464242 | CALD1        | 2 | EGFR and pan-negative |
| cg06456031 | 7 | 134832850 | TMEM140      | 2 | EGFR and pan-negative |
| cg18152517 | 7 | 134915756 | STRA8        | 2 | EGFR and pan-negative |
| cg02005755 | 7 | 135412849 | SLC13A4      | 2 | EGFR and pan-negative |
| cg23398173 | 7 | 135662345 | MTPN         | 2 | EGFR and pan-negative |
| cg04748704 | 7 | 136553243 | CHRM2        | 2 | EGFR and pan-negative |
| cg00973677 | 7 | 136553595 | CHRM2        | 2 | EGFR and pan-negative |
| cg11521965 | 7 | 137028604 | PTN          | 2 | EGFR and pan-negative |
| cg08434234 | 7 | 137531173 | DGKI         | 2 | EGFR and pan-negative |
| cg06277657 | 7 | 137532374 | DGKI         | 2 | EGFR and pan-negative |
| cg02096656 | 7 | 139025181 | C7orf55      | 2 | EGFR and pan-negative |
| cg24435704 | 7 | 139763773 | PARP12       | 2 | EGFR and pan-negative |
| cg21043558 | 7 | 140625365 | BRAF         | 2 | EGFR and pan-negative |
| cg01182873 | 7 | 141464291 | TAS2R3       | 2 | EGFR and pan-negative |
| cg18463686 | 7 | 141646690 | CLEC5A       | 2 | EGFR and pan-negative |
| cg25481253 | 7 | 141673384 | TAS2R38      | 2 | EGFR and pan-negative |
| cg03017475 | 7 | 141674341 | TAS2R38      | 2 | EGFR and pan-negative |
| cg18971054 | 7 | 141695759 | MGAM         | 2 | EGFR and pan-negative |
| cg14153740 | 7 | 141957702 | PRSS58       | 2 | EGFR and pan-negative |
| cg10466917 | 7 | 141958449 | PRSS58       | 2 | EGFR and pan-negative |
| cg12878228 | 7 | 142456124 | PRSS1        | 2 | EGFR and pan-negative |
| cg24680924 | 7 | 142552940 | EPHB6        | 2 | EGFR and pan-negative |
| cg02786019 | 7 | 142582859 | TRPV6        | 2 | EGFR and pan-negative |
| cg14269477 | 7 | 142630597 | TRPV5        | 2 | EGFR and pan-negative |
| cg13675849 | 7 | 142631215 | TRPV5        | 2 | EGFR and pan-negative |
| cg22298208 | 7 | 142635611 | C7orf34      | 2 | EGFR and pan-negative |
| cg26628847 | 7 | 142829304 | PIP          | 2 | EGFR and pan-negative |
| cg26756862 | 7 | 143012960 | CLCN1        | 2 | EGFR and pan-negative |
| cg18997129 | 7 | 143105850 | EPHA1        | 2 | EGFR and pan-negative |
| cg15905634 | 7 | 143140053 | TAS2R60      | 2 | EGFR and pan-negative |
| cg08634024 | 7 | 143657177 | OR2F1        | 2 | EGFR and pan-negative |
| cg07028533 | 7 | 145813439 | CNTNAP2      | 2 | EGFR and pan-negative |
| cg16254309 | 7 | 145814152 | CNTNAP2      | 2 | EGFR and pan-negative |
| cg07753583 | 7 | 150020206 | LRRC61       | 2 | EGFR and pan-negative |
| cg21516287 | 7 | 150020855 | ACTR3C       | 2 | EGFR and pan-negative |
| cg12556325 | 7 | 150026731 | ZBED6CL      | 2 | EGFR and pan-negative |
| cg04999691 | 7 | 150027050 | ZBED6CL      | 2 | EGFR and pan-negative |
| cg17279839 | 7 | 150038598 | RARRES2      | 2 | EGFR and pan-negative |
| cg02902770 | 7 | 150039406 | RARRES2      | 2 | EGFR and pan-negative |
| cg01827098 | 7 | 150211152 | GIMAP7       | 2 | EGFR and pan-negative |
| cg25168545 | 7 | 150413893 | GIMAP1       | 2 | EGFR and pan-negative |
| cg26385222 | 7 | 150497077 | TMEM176B     | 2 | EGFR and pan-negative |
| cg02244695 | 7 | 150497346 | TMEM176B     | 2 | EGFR and pan-negative |
| cg03964111 | 7 | 150498493 | TMEM176B     | 2 | EGFR and pan-negative |
| cg07897701 | 7 | 150549370 | AOC1         | 2 | EGFR and pan-negative |
| cg13603551 | 7 | 150549406 | AOC1         | 2 | EGFR and pan-negative |
| cg19781133 | 7 | 150674980 | KCNH2        | 2 | EGFR and pan-negative |
| cg25007250 | 7 | 150687712 | NOS3         | 2 | EGFR and pan-negative |
| cg03842617 | 7 | 150688556 | NOS3         | 2 | EGFR and pan-negative |
| cg26159905 | 7 | 150884914 | ASB10        | 2 | EGFR and pan-negative |
| cg24068372 | 7 | 151107261 | WDR86        | 2 | EGFR and pan-negative |
| cg25310567 | 7 | 151653890 | GALNTL5      | 2 | EGFR and pan-negative |
| cg20919133 | 7 | 152134133 | FABP5P3      | 2 | EGFR and pan-negative |
| cg08782122 | 7 | 153110994 | 0            | 2 | EGFR and pan-negative |
| cg06832039 | 7 | 153111226 | 0            | 2 | EGFR and pan-negative |
| cg06434470 | 7 | 154429544 | DPP6         | 2 | EGFR and pan-negative |
| cg25780543 | 7 | 154862770 | LOC100128264 | 2 | EGFR and pan-negative |

|            |   |           |            |   |                       |
|------------|---|-----------|------------|---|-----------------------|
| cg21051046 | 7 | 155248393 | 0          | 2 | EGFR and pan-negative |
| cg11648289 | 7 | 155249674 | EN2        | 2 | EGFR and pan-negative |
| cg03914452 | 7 | 155464145 | RBM33      | 2 | EGFR and pan-negative |
| cg00577464 | 7 | 155604780 | SHH        | 2 | EGFR and pan-negative |
| cg25167838 | 7 | 155605092 | SHH        | 2 | EGFR and pan-negative |
| cg13258700 | 7 | 156433997 | RNF32      | 2 | EGFR and pan-negative |
| cg18349835 | 7 | 158937107 | VIPR2      | 2 | EGFR and pan-negative |
| cg23833896 | 8 | 1711046   | CLN8       | 2 | EGFR and pan-negative |
| cg14681767 | 8 | 1772393   | ARHGEF10   | 2 | EGFR and pan-negative |
| cg22619018 | 8 | 4852624   | CSMD1      | 2 | EGFR and pan-negative |
| cg01136458 | 8 | 4853275   | CSMD1      | 2 | EGFR and pan-negative |
| cg11043092 | 8 | 6287904   | MCPH1      | 2 | EGFR and pan-negative |
| cg19033555 | 8 | 6736385   | DEFB1      | 2 | EGFR and pan-negative |
| cg27212977 | 8 | 6783407   | DEFA6      | 2 | EGFR and pan-negative |
| cg07974303 | 8 | 6783987   | DEFA6      | 2 | EGFR and pan-negative |
| cg19304352 | 8 | 6796176   | DEFA4      | 2 | EGFR and pan-negative |
| cg10758292 | 8 | 6837381   | DEFA1B     | 2 | EGFR and pan-negative |
| cg22218909 | 8 | 6876386   | DEFA1B     | 2 | EGFR and pan-negative |
| cg15481539 | 8 | 6913441   | DEFA5      | 2 | EGFR and pan-negative |
| cg04747619 | 8 | 6914838   | DEFA5      | 2 | EGFR and pan-negative |
| cg25214366 | 8 | 7287673   | DEFB103B   | 2 | EGFR and pan-negative |
| cg17288121 | 8 | 7288014   | DEFB103A   | 2 | EGFR and pan-negative |
| cg19787037 | 8 | 7321179   | SPAG11B    | 2 | EGFR and pan-negative |
| cg25107903 | 8 | 7321359   | SPAG11B    | 2 | EGFR and pan-negative |
| cg08753553 | 8 | 7343357   | DEFB106A   | 2 | EGFR and pan-negative |
| cg05810550 | 8 | 7343451   | DEFB106B   | 2 | EGFR and pan-negative |
| cg14120879 | 8 | 7344638   | DEFB105B   | 2 | EGFR and pan-negative |
| cg23152755 | 8 | 7346035   | DEFB105B   | 2 | EGFR and pan-negative |
| cg22478614 | 8 | 7752260   | DEFB4A     | 2 | EGFR and pan-negative |
| cg24727203 | 8 | 9007933   | PPP1R3B    | 2 | EGFR and pan-negative |
| cg08056146 | 8 | 10588013  | SOX7       | 2 | EGFR and pan-negative |
| cg24690731 | 8 | 10589093  | SOX7       | 2 | EGFR and pan-negative |
| cg11434468 | 8 | 11059277  | XKR6       | 2 | EGFR and pan-negative |
| cg24505375 | 8 | 11188774  | SLC35G5    | 2 | EGFR and pan-negative |
| cg15742700 | 8 | 11350853  | BLK        | 2 | EGFR and pan-negative |
| cg03860768 | 8 | 11351571  | BLK        | 2 | EGFR and pan-negative |
| cg18123948 | 8 | 11560781  | GATA4      | 2 | EGFR and pan-negative |
| cg10866709 | 8 | 11561361  | GATA4      | 2 | EGFR and pan-negative |
| cg14900471 | 8 | 11561620  | GATA4      | 2 | EGFR and pan-negative |
| cg21073927 | 8 | 11562155  | GATA4      | 2 | EGFR and pan-negative |
| cg00090147 | 8 | 11562367  | GATA4      | 2 | EGFR and pan-negative |
| cg14134005 | 8 | 11563042  | GATA4      | 2 | EGFR and pan-negative |
| cg25216696 | 8 | 11565351  | GATA4      | 2 | EGFR and pan-negative |
| cg24646414 | 8 | 11565725  | GATA4      | 2 | EGFR and pan-negative |
| cg09626984 | 8 | 11566096  | GATA4      | 2 | EGFR and pan-negative |
| cg11981599 | 8 | 11566526  | GATA4      | 2 | EGFR and pan-negative |
| cg20279283 | 8 | 11566863  | GATA4      | 2 | EGFR and pan-negative |
| cg26104469 | 8 | 14411685  | SGCZ       | 2 | EGFR and pan-negative |
| cg19353006 | 8 | 15397237  | TUSC3      | 2 | EGFR and pan-negative |
| cg12089439 | 8 | 15398333  | TUSC3      | 2 | EGFR and pan-negative |
| cg16303562 | 8 | 16050333  | MSR1       | 2 | EGFR and pan-negative |
| cg01668126 | 8 | 16050740  | MSR1       | 2 | EGFR and pan-negative |
| cg24030449 | 8 | 16859671  | FGF20      | 2 | EGFR and pan-negative |
| cg26831415 | 8 | 16885270  | MICU3      | 2 | EGFR and pan-negative |
| cg02786378 | 8 | 17396844  | SLC7A2     | 2 | EGFR and pan-negative |
| cg01871995 | 8 | 17754363  | FGL1       | 2 | EGFR and pan-negative |
| cg04149472 | 8 | 18066144  | NAT1       | 2 | EGFR and pan-negative |
| cg21363706 | 8 | 18066485  | NAT1       | 2 | EGFR and pan-negative |
| cg14494313 | 8 | 18248453  | NAT2       | 2 | EGFR and pan-negative |
| cg12639234 | 8 | 18248964  | NAT2       | 2 | EGFR and pan-negative |
| cg08040428 | 8 | 18870913  | PSD3       | 2 | EGFR and pan-negative |
| cg09537031 | 8 | 19171706  | SH2D4A     | 2 | EGFR and pan-negative |
| cg23328404 | 8 | 19539991  | CSGALNACT1 | 2 | EGFR and pan-negative |
| cg15379858 | 8 | 19540466  | CSGALNACT1 | 2 | EGFR and pan-negative |
| cg08918749 | 8 | 19797445  | LPL        | 2 | EGFR and pan-negative |
| cg13857100 | 8 | 20041700  | SLC18A1    | 2 | EGFR and pan-negative |
| cg09950370 | 8 | 21609373  | GFRA2      | 2 | EGFR and pan-negative |
| cg14386061 | 8 | 21771446  | DOK2       | 2 | EGFR and pan-negative |
| cg26401870 | 8 | 21882439  | NPM2       | 2 | EGFR and pan-negative |
| cg10194829 | 8 | 21900177  | FGF17      | 2 | EGFR and pan-negative |
| cg16293656 | 8 | 21900438  | FGF17      | 2 | EGFR and pan-negative |
| cg14706739 | 8 | 21916355  | DMTN       | 2 | EGFR and pan-negative |
| cg26045434 | 8 | 21987861  | HR         | 2 | EGFR and pan-negative |
| cg12748258 | 8 | 21988173  | HR         | 2 | EGFR and pan-negative |
| cg25552492 | 8 | 22013999  | LGI3       | 2 | EGFR and pan-negative |
| cg19516009 | 8 | 22018080  | SFTPC      | 2 | EGFR and pan-negative |
| cg05947740 | 8 | 22089778  | PHYHIP     | 2 | EGFR and pan-negative |
| cg01735903 | 8 | 22102669  | POLR3D     | 2 | EGFR and pan-negative |
| cg09037858 | 8 | 22103057  | POLR3D     | 2 | EGFR and pan-negative |
| cg23431988 | 8 | 22132563  | PIWIL2     | 2 | EGFR and pan-negative |
| cg05254747 | 8 | 22223937  | SLC39A14   | 2 | EGFR and pan-negative |
| cg27380758 | 8 | 22408571  | SORBS3     | 2 | EGFR and pan-negative |
| cg02938601 | 8 | 22961088  | TNFRSF10C  | 2 | EGFR and pan-negative |
| cg10964421 | 8 | 23021093  | TNFRSF10D  | 2 | EGFR and pan-negative |
| cg21481775 | 8 | 23539627  | NKX3-1     | 2 | EGFR and pan-negative |
| cg21428681 | 8 | 23540856  | NKX3-1     | 2 | EGFR and pan-negative |
| cg13059335 | 8 | 24242109  | ADAMDEC1   | 2 | EGFR and pan-negative |
| cg15610233 | 8 | 24297874  | ADAM7      | 2 | EGFR and pan-negative |
| cg05847038 | 8 | 24298771  | ADAM7      | 2 | EGFR and pan-negative |
| cg13266631 | 8 | 24815006  | NEFL       | 2 | EGFR and pan-negative |
| cg25192419 | 8 | 25042348  | DOCK5      | 2 | EGFR and pan-negative |
| cg07149772 | 8 | 25314972  | KCTD9      | 2 | EGFR and pan-negative |
| cg02154186 | 8 | 26371353  | PNMA2      | 2 | EGFR and pan-negative |
| cg22461835 | 8 | 26723365  | ADRA1A     | 2 | EGFR and pan-negative |
| cg13351161 | 8 | 27490921  | SCARA3     | 2 | EGFR and pan-negative |

|            |   |          |              |   |                       |
|------------|---|----------|--------------|---|-----------------------|
| cg07634191 | 8 | 27850178 | SCARA5       | 2 | EGFR and pan-negative |
| cg10171125 | 8 | 27850315 | SCARA5       | 2 | EGFR and pan-negative |
| cg19391527 | 8 | 28173732 | PNOC         | 2 | EGFR and pan-negative |
| cg14658362 | 8 | 30241661 | RBPMS        | 2 | EGFR and pan-negative |
| cg20939319 | 8 | 30707701 | TEX15        | 2 | EGFR and pan-negative |
| cg09945801 | 8 | 30890139 | PURG         | 2 | EGFR and pan-negative |
| cg19162158 | 8 | 32405427 | NRG1         | 2 | EGFR and pan-negative |
| cg17457560 | 8 | 32405851 | NRG1         | 2 | EGFR and pan-negative |
| cg23663332 | 8 | 33341954 | MAK16        | 2 | EGFR and pan-negative |
| cg25781202 | 8 | 33424350 | RNF122       | 2 | EGFR and pan-negative |
| cg25738273 | 8 | 33457336 | DUSP26       | 2 | EGFR and pan-negative |
| cg00297600 | 8 | 35401670 | UNC5D        | 2 | EGFR and pan-negative |
| cg08331840 | 8 | 36746760 | KCNU1        | 2 | EGFR and pan-negative |
| cg20011352 | 8 | 37655269 | GPR124       | 2 | EGFR and pan-negative |
| cg17619823 | 8 | 37823475 | ADRB3        | 2 | EGFR and pan-negative |
| cg01386493 | 8 | 37824529 | ADRB3        | 2 | EGFR and pan-negative |
| cg09630404 | 8 | 38008543 | STAR         | 2 | EGFR and pan-negative |
| cg15791248 | 8 | 38326730 | FGFR1        | 2 | EGFR and pan-negative |
| cg23843812 | 8 | 38385977 | C8orf86      | 2 | EGFR and pan-negative |
| cg11653466 | 8 | 38386235 | C8orf86      | 2 | EGFR and pan-negative |
| cg09314766 | 8 | 39695697 | ADAM2        | 2 | EGFR and pan-negative |
| cg03716937 | 8 | 39695862 | ADAM2        | 2 | EGFR and pan-negative |
| cg08465774 | 8 | 39771756 | IDO1         | 2 | EGFR and pan-negative |
| cg17939444 | 8 | 40010443 | C8orf4       | 2 | EGFR and pan-negative |
| cg02388150 | 8 | 41165699 | SFRP1        | 2 | EGFR and pan-negative |
| cg13398291 | 8 | 41166169 | SFRP1        | 2 | EGFR and pan-negative |
| cg15839448 | 8 | 41166530 | SFRP1        | 2 | EGFR and pan-negative |
| cg24599942 | 8 | 41386345 | GINS4        | 2 | EGFR and pan-negative |
| cg12091331 | 8 | 42065314 | PLAT         | 2 | EGFR and pan-negative |
| cg17910564 | 8 | 42248702 | VDAC3        | 2 | EGFR and pan-negative |
| cg02641676 | 8 | 42397764 | SLC20A2      | 2 | EGFR and pan-negative |
| cg25612480 | 8 | 48920460 | UBE2V2       | 2 | EGFR and pan-negative |
| cg25538571 | 8 | 49502710 | 0            | 2 | EGFR and pan-negative |
| cg03167883 | 8 | 49502967 | 0            | 2 | EGFR and pan-negative |
| cg22836229 | 8 | 49647717 | EFCAB1       | 2 | EGFR and pan-negative |
| cg11868900 | 8 | 49648035 | EFCAB1       | 2 | EGFR and pan-negative |
| cg24593475 | 8 | 49833956 | SNAI2        | 2 | EGFR and pan-negative |
| cg09881855 | 8 | 49834618 | SNAI2        | 2 | EGFR and pan-negative |
| cg08896053 | 8 | 50823468 | SNTG1        | 2 | EGFR and pan-negative |
| cg15585987 | 8 | 50824749 | SNTG1        | 2 | EGFR and pan-negative |
| cg03835158 | 8 | 52773607 | PCMTD1       | 2 | EGFR and pan-negative |
| cg17162024 | 8 | 53478454 | FAM150A      | 2 | EGFR and pan-negative |
| cg26021627 | 8 | 53478706 | FAM150A      | 2 | EGFR and pan-negative |
| cg07629017 | 8 | 53851613 | NPBWR1       | 2 | EGFR and pan-negative |
| cg25990647 | 8 | 54164081 | OPRK1        | 2 | EGFR and pan-negative |
| cg21226224 | 8 | 55370171 | SOX17        | 2 | EGFR and pan-negative |
| cg22411207 | 8 | 57026301 | MOS          | 2 | EGFR and pan-negative |
| cg05661838 | 8 | 57026568 | MOS          | 2 | EGFR and pan-negative |
| cg26369642 | 8 | 58987333 | FAM110B      | 2 | EGFR and pan-negative |
| cg23750142 | 8 | 61193876 | CA8          | 2 | EGFR and pan-negative |
| cg12095167 | 8 | 61428991 | RAB2A        | 2 | EGFR and pan-negative |
| cg22915732 | 8 | 62200518 | CLVS1        | 2 | EGFR and pan-negative |
| cg01405761 | 8 | 62200689 | CLVS1        | 2 | EGFR and pan-negative |
| cg22766145 | 8 | 65492528 | BHLHE22      | 2 | EGFR and pan-negative |
| cg23322523 | 8 | 67039041 | TRIM55       | 2 | EGFR and pan-negative |
| cg20329958 | 8 | 67090250 | CRH          | 2 | EGFR and pan-negative |
| cg08090772 | 8 | 67344640 | ADHFE1       | 2 | EGFR and pan-negative |
| cg01988129 | 8 | 67344936 | ADHFE1       | 2 | EGFR and pan-negative |
| cg23704362 | 8 | 67405742 | C8orf46      | 2 | EGFR and pan-negative |
| cg07595113 | 8 | 67525279 | MYBL1        | 2 | EGFR and pan-negative |
| cg21750887 | 8 | 68658237 | CPA6         | 2 | EGFR and pan-negative |
| cg13652336 | 8 | 68864012 | PREX2        | 2 | EGFR and pan-negative |
| cg22199118 | 8 | 69350927 | C8orf34      | 2 | EGFR and pan-negative |
| cg10457247 | 8 | 70983079 | PRDM14       | 2 | EGFR and pan-negative |
| cg17127823 | 8 | 71520941 | LOC286190    | 2 | EGFR and pan-negative |
| cg19632760 | 8 | 71581729 | XKR9         | 2 | EGFR and pan-negative |
| cg16793061 | 8 | 72273984 | EYA1         | 2 | EGFR and pan-negative |
| cg06269753 | 8 | 72755871 | LOC100132891 | 2 | EGFR and pan-negative |
| cg06493386 | 8 | 72987797 | TRPA1        | 2 | EGFR and pan-negative |
| cg01610488 | 8 | 72987870 | TRPA1        | 2 | EGFR and pan-negative |
| cg11754206 | 8 | 73448579 | KCNB2        | 2 | EGFR and pan-negative |
| cg20890210 | 8 | 73450181 | KCNB2        | 2 | EGFR and pan-negative |
| cg01410472 | 8 | 75896975 | CRISPLD1     | 2 | EGFR and pan-negative |
| cg04689061 | 8 | 79427993 | PKIA         | 2 | EGFR and pan-negative |
| cg27140220 | 8 | 79428434 | PKIA         | 2 | EGFR and pan-negative |
| cg23326689 | 8 | 80523461 | STMN2        | 2 | EGFR and pan-negative |
| cg24229963 | 8 | 82633648 | ZFAND1       | 2 | EGFR and pan-negative |
| cg02471507 | 8 | 82644747 | CHMP4C       | 2 | EGFR and pan-negative |
| cg17191715 | 8 | 86290878 | CA1          | 2 | EGFR and pan-negative |
| cg08872550 | 8 | 86375450 | CA2          | 2 | EGFR and pan-negative |
| cg00319692 | 8 | 87111119 | ATP6V0D2     | 2 | EGFR and pan-negative |
| cg06757810 | 8 | 87756528 | CNGB3        | 2 | EGFR and pan-negative |
| cg01587454 | 8 | 88886051 | DCAF4L2      | 2 | EGFR and pan-negative |
| cg17703554 | 8 | 88886339 | DCAF4L2      | 2 | EGFR and pan-negative |
| cg26756083 | 8 | 89339622 | MMP16        | 2 | EGFR and pan-negative |
| cg15842483 | 8 | 90914033 | OSGIN2       | 2 | EGFR and pan-negative |
| cg12402251 | 8 | 91094811 | CALB1        | 2 | EGFR and pan-negative |
| cg06281795 | 8 | 91095114 | CALB1        | 2 | EGFR and pan-negative |
| cg12038710 | 8 | 95220583 | CDH17        | 2 | EGFR and pan-negative |
| cg18565355 | 8 | 95653874 | ESRP1        | 2 | EGFR and pan-negative |
| cg21197871 | 8 | 96036803 | NDUFAF6      | 2 | EGFR and pan-negative |
| cg17987660 | 8 | 96281909 | C8orf37      | 2 | EGFR and pan-negative |
| cg00317680 | 8 | 97274070 | PTDSS1       | 2 | EGFR and pan-negative |
| cg15747595 | 8 | 98289880 | TSPYL5       | 2 | EGFR and pan-negative |
| cg10039928 | 8 | 98880860 | MATN2        | 2 | EGFR and pan-negative |

|            |   |           |                   |   |                       |
|------------|---|-----------|-------------------|---|-----------------------|
| cg16202564 | 8 | 98881927  | <i>MATN2</i>      | 2 | EGFR and pan-negative |
| cg20304401 | 8 | 101733920 | <i>PABPC1</i>     | 2 | EGFR and pan-negative |
| cg24812103 | 8 | 101735630 | <i>PABPC1</i>     | 2 | EGFR and pan-negative |
| cg10918202 | 8 | 104153173 | <i>BAALC</i>      | 2 | EGFR and pan-negative |
| cg05341878 | 8 | 104831646 | <i>RIMS2</i>      | 2 | EGFR and pan-negative |
| cg08657449 | 8 | 105351661 | <i>DCSTAMP</i>    | 2 | EGFR and pan-negative |
| cg20774846 | 8 | 105479420 | <i>DPYS</i>       | 2 | EGFR and pan-negative |
| cg24098951 | 8 | 105601036 | <i>LRP12</i>      | 2 | EGFR and pan-negative |
| cg09531892 | 8 | 105601835 | <i>LRP12</i>      | 2 | EGFR and pan-negative |
| cg15603885 | 8 | 107782373 | <i>ABRA</i>       | 2 | EGFR and pan-negative |
| cg11745019 | 8 | 108509756 | <i>ANGPT1</i>     | 2 | EGFR and pan-negative |
| cg14070647 | 8 | 109095264 | <i>RSPO2</i>      | 2 | EGFR and pan-negative |
| cg26989103 | 8 | 110099582 | <i>TRHR</i>       | 2 | EGFR and pan-negative |
| cg22268164 | 8 | 110099750 | <i>TRHR</i>       | 2 | EGFR and pan-negative |
| cg05860890 | 8 | 110986870 | <i>KCNV1</i>      | 2 | EGFR and pan-negative |
| cg04237663 | 8 | 110987019 | <i>KCNV1</i>      | 2 | EGFR and pan-negative |
| cg01911082 | 8 | 114449272 | <i>CSMD3</i>      | 2 | EGFR and pan-negative |
| cg19620294 | 8 | 119964729 | <i>TNFRSF11B</i>  | 2 | EGFR and pan-negative |
| cg14409958 | 8 | 120651652 | <i>ENPP2</i>      | 2 | EGFR and pan-negative |
| cg23196831 | 8 | 121137537 | <i>COL14A1</i>    | 2 | EGFR and pan-negative |
| cg08598221 | 8 | 121824929 | <i>SNTB1</i>      | 2 | EGFR and pan-negative |
| cg14992108 | 8 | 121825470 | <i>SNTB1</i>      | 2 | EGFR and pan-negative |
| cg04719491 | 8 | 122654045 | <i>HAS2</i>       | 2 | EGFR and pan-negative |
| cg24833277 | 8 | 124194361 | <i>FAM83A</i>     | 2 | EGFR and pan-negative |
| cg02800334 | 8 | 124750855 | <i>ANXA13</i>     | 2 | EGFR and pan-negative |
| cg00551244 | 8 | 125183776 | <i>FER1L6-AS2</i> | 2 | EGFR and pan-negative |
| cg23968383 | 8 | 125984927 | <i>ZNF572</i>     | 2 | EGFR and pan-negative |
| cg27089714 | 8 | 126097158 | <i>KIAA0196</i>   | 2 | EGFR and pan-negative |
| cg23179168 | 8 | 127570165 | <i>FAM84B</i>     | 2 | EGFR and pan-negative |
| cg05316065 | 8 | 130799007 | <i>GSDMC</i>      | 2 | EGFR and pan-negative |
| cg13912117 | 8 | 132054555 | <i>0</i>          | 2 | EGFR and pan-negative |
| cg12791465 | 8 | 133093721 | <i>HHLA1</i>      | 2 | EGFR and pan-negative |
| cg27159719 | 8 | 133772742 | <i>TMEM71</i>     | 2 | EGFR and pan-negative |
| cg24833176 | 8 | 133788347 | <i>PHF20L1</i>    | 2 | EGFR and pan-negative |
| cg06276653 | 8 | 139164635 | <i>FAM135B</i>    | 2 | EGFR and pan-negative |
| cg15642035 | 8 | 139165052 | <i>FAM135B</i>    | 2 | EGFR and pan-negative |
| cg17834752 | 8 | 140715239 | <i>KCNK9</i>      | 2 | EGFR and pan-negative |
| cg01717150 | 8 | 140716495 | <i>KCNK9</i>      | 2 | EGFR and pan-negative |
| cg08569678 | 8 | 143781397 | <i>LY6K</i>       | 2 | EGFR and pan-negative |
| cg20862496 | 8 | 143823734 | <i>SLURP1</i>     | 2 | EGFR and pan-negative |
| cg07441143 | 8 | 143824001 | <i>SLURP1</i>     | 2 | EGFR and pan-negative |
| cg23180489 | 8 | 143859786 | <i>LYNX1</i>      | 2 | EGFR and pan-negative |
| cg05800321 | 8 | 143867799 | <i>LY6D</i>       | 2 | EGFR and pan-negative |
| cg07711097 | 8 | 143915954 | <i>GML</i>        | 2 | EGFR and pan-negative |
| cg09120035 | 8 | 143961145 | <i>CYP11B1</i>    | 2 | EGFR and pan-negative |
| cg10500909 | 8 | 144000015 | <i>CYP11B2</i>    | 2 | EGFR and pan-negative |
| cg24377133 | 8 | 144170375 | <i>0</i>          | 2 | EGFR and pan-negative |
| cg04583874 | 8 | 144242268 | <i>LY6H</i>       | 2 | EGFR and pan-negative |
| cg00311768 | 8 | 144698857 | <i>TSTA3</i>      | 2 | EGFR and pan-negative |
| cg11695358 | 8 | 144797963 | <i>MAPK15</i>     | 2 | EGFR and pan-negative |
| cg01399317 | 8 | 144810339 | <i>FAM83H</i>     | 2 | EGFR and pan-negative |
| cg20520888 | 8 | 145086243 | <i>SPATC1</i>     | 2 | EGFR and pan-negative |
| cg15301700 | 8 | 145560531 | <i>SCRT1</i>      | 2 | EGFR and pan-negative |
| cg11800672 | 8 | 145642291 | <i>SLC39A4</i>    | 2 | EGFR and pan-negative |
| cg11757293 | 8 | 145692581 | <i>KIFC2</i>      | 2 | EGFR and pan-negative |
| cg11290225 | 8 | 145692591 | <i>KIFC2</i>      | 2 | EGFR and pan-negative |
| cg05113558 | 8 | 145702343 | <i>FOXH1</i>      | 2 | EGFR and pan-negative |
| cg10935709 | 9 | 179280    | <i>CBWD1</i>      | 2 | EGFR and pan-negative |
| cg08909157 | 9 | 215561    | <i>C9orf66</i>    | 2 | EGFR and pan-negative |
| cg19252956 | 9 | 273072    | <i>DOCK8</i>      | 2 | EGFR and pan-negative |
| cg17694279 | 9 | 503890    | <i>KANK1</i>      | 2 | EGFR and pan-negative |
| cg25905812 | 9 | 841632    | <i>DMRT1</i>      | 2 | EGFR and pan-negative |
| cg03168582 | 9 | 841850    | <i>DMRT1</i>      | 2 | EGFR and pan-negative |
| cg26489108 | 9 | 975856    | <i>DMRT3</i>      | 2 | EGFR and pan-negative |
| cg12420104 | 9 | 977109    | <i>DMRT3</i>      | 2 | EGFR and pan-negative |
| cg00250430 | 9 | 1051579   | <i>DMRT2</i>      | 2 | EGFR and pan-negative |
| cg24471894 | 9 | 2838508   | <i>KIAA0020</i>   | 2 | EGFR and pan-negative |
| cg18988395 | 9 | 4152606   | <i>GLIS3</i>      | 2 | EGFR and pan-negative |
| cg11830061 | 9 | 5185415   | <i>INSL6</i>      | 2 | EGFR and pan-negative |
| cg19297688 | 9 | 5231360   | <i>INSL4</i>      | 2 | EGFR and pan-negative |
| cg12067261 | 9 | 5231539   | <i>INSL4</i>      | 2 | EGFR and pan-negative |
| cg20789691 | 9 | 5340039   | <i>RLN1</i>       | 2 | EGFR and pan-negative |
| cg11821702 | 9 | 5891258   | <i>MLANA</i>      | 2 | EGFR and pan-negative |
| cg11747771 | 9 | 6645468   | <i>GLDC</i>       | 2 | EGFR and pan-negative |
| cg09440243 | 9 | 9019757   | <i>PTPRD</i>      | 2 | EGFR and pan-negative |
| cg25989745 | 9 | 12693326  | <i>TYRP1</i>      | 2 | EGFR and pan-negative |
| cg03905144 | 9 | 13249504  | <i>MPDZ</i>       | 2 | EGFR and pan-negative |
| cg22117143 | 9 | 13251431  | <i>MPDZ</i>       | 2 | EGFR and pan-negative |
| cg09965258 | 9 | 14313762  | <i>NFIB</i>       | 2 | EGFR and pan-negative |
| cg17398595 | 9 | 17578725  | <i>SH3GL2</i>     | 2 | EGFR and pan-negative |
| cg17977409 | 9 | 17579227  | <i>SH3GL2</i>     | 2 | EGFR and pan-negative |
| cg16714091 | 9 | 18473902  | <i>ADAMTSL1</i>   | 2 | EGFR and pan-negative |
| cg00116234 | 9 | 18474243  | <i>ADAMTSL1</i>   | 2 | EGFR and pan-negative |
| cg07664183 | 9 | 19103231  | <i>HAUS6</i>      | 2 | EGFR and pan-negative |
| cg16925486 | 9 | 19380496  | <i>RPS6</i>       | 2 | EGFR and pan-negative |
| cg12348970 | 9 | 19786543  | <i>SLC24A2</i>    | 2 | EGFR and pan-negative |
| cg05126264 | 9 | 21077879  | <i>IFNB1</i>      | 2 | EGFR and pan-negative |
| cg07236769 | 9 | 21142491  | <i>IFNW1</i>      | 2 | EGFR and pan-negative |
| cg07373172 | 9 | 21166245  | <i>IFNA21</i>     | 2 | EGFR and pan-negative |
| cg19982860 | 9 | 21166581  | <i>IFNA21</i>     | 2 | EGFR and pan-negative |
| cg23029519 | 9 | 21187344  | <i>IFNA4</i>      | 2 | EGFR and pan-negative |
| cg06479216 | 9 | 21218462  | <i>IFNA16</i>     | 2 | EGFR and pan-negative |
| cg01074640 | 9 | 21228142  | <i>IFNA17</i>     | 2 | EGFR and pan-negative |
| cg00474004 | 9 | 21239944  | <i>IFNA14</i>     | 2 | EGFR and pan-negative |
| cg27351998 | 9 | 21304618  | <i>IFNA5</i>      | 2 | EGFR and pan-negative |

|            |   |           |           |   |                       |
|------------|---|-----------|-----------|---|-----------------------|
| cg26766480 | 9 | 21350197  | 0         | 2 | EGFR and pan-negative |
| cg01906717 | 9 | 21368203  | IFNA13    | 2 | EGFR and pan-negative |
| cg01713938 | 9 | 21368292  | IFNA13    | 2 | EGFR and pan-negative |
| cg13235447 | 9 | 21385440  | IFNA2     | 2 | EGFR and pan-negative |
| cg15669228 | 9 | 21409505  | IFNA8     | 2 | EGFR and pan-negative |
| cg16823701 | 9 | 21440219  | IFNA1     | 2 | EGFR and pan-negative |
| cg11959435 | 9 | 21440836  | IFNA1     | 2 | EGFR and pan-negative |
| cg11653709 | 9 | 21968146  | CDKN2A    | 2 | EGFR and pan-negative |
| cg09099744 | 9 | 21968372  | CDKN2A    | 2 | EGFR and pan-negative |
| cg07752420 | 9 | 21968681  | CDKN2A    | 2 | EGFR and pan-negative |
| cg10895543 | 9 | 21968832  | CDKN2A    | 2 | EGFR and pan-negative |
| cg13479669 | 9 | 21994108  | CDKN2A    | 2 | EGFR and pan-negative |
| cg10210238 | 9 | 22005995  | CDKN2B    | 2 | EGFR and pan-negative |
| cg19133618 | 9 | 22008970  | CDKN2B    | 2 | EGFR and pan-negative |
| cg22007439 | 9 | 22446972  | DMRTA1    | 2 | EGFR and pan-negative |
| cg23693510 | 9 | 23825759  | ELAVL2    | 2 | EGFR and pan-negative |
| cg07623294 | 9 | 23826507  | ELAVL2    | 2 | EGFR and pan-negative |
| cg09827833 | 9 | 27109492  | TEK       | 2 | EGFR and pan-negative |
| cg09179743 | 9 | 27524436  | IFNK      | 2 | EGFR and pan-negative |
| cg04151683 | 9 | 28718459  | LINGO2    | 2 | EGFR and pan-negative |
| cg01130192 | 9 | 32385002  | ACO1      | 2 | EGFR and pan-negative |
| cg14614901 | 9 | 32783463  | TMEM215   | 2 | EGFR and pan-negative |
| cg11308840 | 9 | 32783516  | TMEM215   | 2 | EGFR and pan-negative |
| cg00079056 | 9 | 33239641  | SPINK4    | 2 | EGFR and pan-negative |
| cg13920529 | 9 | 33402426  | AQP7      | 2 | EGFR and pan-negative |
| cg08578641 | 9 | 34457440  | FAM219A   | 2 | EGFR and pan-negative |
| cg23579062 | 9 | 34457500  | FAM219A   | 2 | EGFR and pan-negative |
| cg06308323 | 9 | 34459568  | DNAI1     | 2 | EGFR and pan-negative |
| cg13226172 | 9 | 34589381  | CNTFR     | 2 | EGFR and pan-negative |
| cg09722555 | 9 | 34662282  | CCL27     | 2 | EGFR and pan-negative |
| cg15777570 | 9 | 34662951  | CCL27     | 2 | EGFR and pan-negative |
| cg27443224 | 9 | 34710135  | CCL21     | 2 | EGFR and pan-negative |
| cg23552468 | 9 | 35040926  | C9orf131  | 2 | EGFR and pan-negative |
| cg18557145 | 9 | 35618083  | CD72      | 2 | EGFR and pan-negative |
| cg15518883 | 9 | 35650561  | SIT1      | 2 | EGFR and pan-negative |
| cg05830416 | 9 | 35665010  | ARHGEF39  | 2 | EGFR and pan-negative |
| cg20610181 | 9 | 35674000  | CA9       | 2 | EGFR and pan-negative |
| cg26922202 | 9 | 35957984  | OR2S2     | 2 | EGFR and pan-negative |
| cg12717594 | 9 | 36037454  | RECK      | 2 | EGFR and pan-negative |
| cg10059959 | 9 | 37035381  | PAX5      | 2 | EGFR and pan-negative |
| cg03528946 | 9 | 38069800  | SHB       | 2 | EGFR and pan-negative |
| cg02090283 | 9 | 39288218  | CNTNAP3   | 2 | EGFR and pan-negative |
| cg13059782 | 9 | 39288689  | CNTNAP3   | 2 | EGFR and pan-negative |
| cg05364569 | 9 | 65493790  | FAM74A2   | 2 | EGFR and pan-negative |
| cg26776077 | 9 | 65493891  | FAM74A4   | 2 | EGFR and pan-negative |
| cg06220208 | 9 | 66555032  | 0         | 2 | EGFR and pan-negative |
| cg22543128 | 9 | 67786307  | FAM27E3   | 2 | EGFR and pan-negative |
| cg20090467 | 9 | 67927004  | ANKRD20A3 | 2 | EGFR and pan-negative |
| cg07485588 | 9 | 70429213  | FOXO4L4   | 2 | EGFR and pan-negative |
| cg24142106 | 9 | 71319485  | PIP5K1B   | 2 | EGFR and pan-negative |
| cg12493160 | 9 | 71628957  | PRKACG    | 2 | EGFR and pan-negative |
| cg11656547 | 9 | 72658747  | MAMDC2    | 2 | EGFR and pan-negative |
| cg20555507 | 9 | 73736452  | TRPM3     | 2 | EGFR and pan-negative |
| cg18286698 | 9 | 74763873  | GDA       | 2 | EGFR and pan-negative |
| cg08768421 | 9 | 74764504  | GDA       | 2 | EGFR and pan-negative |
| cg01894895 | 9 | 75766294  | ANXA1     | 2 | EGFR and pan-negative |
| cg22161874 | 9 | 77503042  | TRPM6     | 2 | EGFR and pan-negative |
| cg05600174 | 9 | 77704537  | OSTF1     | 2 | EGFR and pan-negative |
| cg08026144 | 9 | 78505312  | PCSK5     | 2 | EGFR and pan-negative |
| cg13789236 | 9 | 79009433  | RFK       | 2 | EGFR and pan-negative |
| cg19282250 | 9 | 79328522  | PRUNE2    | 2 | EGFR and pan-negative |
| cg11195662 | 9 | 79520720  | PRUNE2    | 2 | EGFR and pan-negative |
| cg19044630 | 9 | 79521532  | PRUNE2    | 2 | EGFR and pan-negative |
| cg17301902 | 9 | 80263219  | GNA14     | 2 | EGFR and pan-negative |
| cg09260830 | 9 | 80263587  | GNA14     | 2 | EGFR and pan-negative |
| cg06692957 | 9 | 80647629  | GNAQ      | 2 | EGFR and pan-negative |
| cg15915418 | 9 | 84303601  | TLE1      | 2 | EGFR and pan-negative |
| cg10319505 | 9 | 85678251  | RASEF     | 2 | EGFR and pan-negative |
| cg22402007 | 9 | 87282823  | NTRK2     | 2 | EGFR and pan-negative |
| cg09539438 | 9 | 87283789  | NTRK2     | 2 | EGFR and pan-negative |
| cg22571217 | 9 | 90112519  | DAPK1     | 2 | EGFR and pan-negative |
| cg08797471 | 9 | 90113120  | DAPK1     | 2 | EGFR and pan-negative |
| cg19734228 | 9 | 90113593  | DAPK1     | 2 | EGFR and pan-negative |
| cg11154542 | 9 | 90340652  | CTSL      | 2 | EGFR and pan-negative |
| cg15242570 | 9 | 90341048  | CTSL      | 2 | EGFR and pan-negative |
| cg27495908 | 9 | 90498223  | SPATA31E1 | 2 | EGFR and pan-negative |
| cg16357921 | 9 | 90589634  | CDK20     | 2 | EGFR and pan-negative |
| cg11594137 | 9 | 91605981  | C9orf47   | 2 | EGFR and pan-negative |
| cg20083676 | 9 | 91605999  | C9orf47   | 2 | EGFR and pan-negative |
| cg22496652 | 9 | 92094625  | SEMA4D    | 2 | EGFR and pan-negative |
| cg25766046 | 9 | 94712122  | ROR2      | 2 | EGFR and pan-negative |
| cg01062029 | 9 | 94712909  | ROR2      | 2 | EGFR and pan-negative |
| cg13580728 | 9 | 95168155  | OGN       | 2 | EGFR and pan-negative |
| cg24105685 | 9 | 95298969  | ECM2      | 2 | EGFR and pan-negative |
| cg26833602 | 9 | 95821549  | SUSD3     | 2 | EGFR and pan-negative |
| cg09547190 | 9 | 95857577  | C9orf89   | 2 | EGFR and pan-negative |
| cg16158807 | 9 | 95946891  | WNK2      | 2 | EGFR and pan-negative |
| cg20616414 | 9 | 95947396  | WNK2      | 2 | EGFR and pan-negative |
| cg09429111 | 9 | 96792562  | PTPDC1    | 2 | EGFR and pan-negative |
| cg20356482 | 9 | 97356092  | FBP2      | 2 | EGFR and pan-negative |
| cg11554937 | 9 | 99064321  | HSD17B3   | 2 | EGFR and pan-negative |
| cg15582789 | 9 | 99145525  | SLC35D2   | 2 | EGFR and pan-negative |
| cg23861715 | 9 | 99382235  | CDC14B    | 2 | EGFR and pan-negative |
| cg12599000 | 9 | 99961508  | 0         | 2 | EGFR and pan-negative |
| cg14414534 | 9 | 100286483 | TMOD1     | 2 | EGFR and pan-negative |

|            |   |           |              |   |                       |
|------------|---|-----------|--------------|---|-----------------------|
| cg15802898 | 9 | 100615201 | FOXE1        | 2 | EGFR and pan-negative |
| cg19292008 | 9 | 100615796 | FOXE1        | 2 | EGFR and pan-negative |
| cg01618660 | 9 | 100882376 | TRIM14       | 2 | EGFR and pan-negative |
| cg02058918 | 9 | 101470884 | GABBR2       | 2 | EGFR and pan-negative |
| cg07903918 | 9 | 101471986 | GABBR2       | 2 | EGFR and pan-negative |
| cg05593325 | 9 | 101569696 | GALNT12      | 2 | EGFR and pan-negative |
| cg19461644 | 9 | 101706617 | COL15A1      | 2 | EGFR and pan-negative |
| cg15526708 | 9 | 101866433 | TGFBF1       | 2 | EGFR and pan-negative |
| cg02590345 | 9 | 103790959 | LPPR1        | 2 | EGFR and pan-negative |
| cg16898420 | 9 | 103791078 | LPPR1        | 2 | EGFR and pan-negative |
| cg26181372 | 9 | 104198262 | ALDOB        | 2 | EGFR and pan-negative |
| cg06912252 | 9 | 104248926 | TMEM246      | 2 | EGFR and pan-negative |
| cg02602411 | 9 | 104357177 | PPP3R2       | 2 | EGFR and pan-negative |
| cg15765694 | 9 | 104358101 | PPP3R2       | 2 | EGFR and pan-negative |
| cg08997253 | 9 | 104500729 | GRIN3A       | 2 | EGFR and pan-negative |
| cg18794577 | 9 | 104501030 | GRIN3A       | 2 | EGFR and pan-negative |
| cg07136161 | 9 | 105758091 | CYLC2        | 2 | EGFR and pan-negative |
| cg22778947 | 9 | 108211064 | FSD1L        | 2 | EGFR and pan-negative |
| cg24073022 | 9 | 108424034 | TAL2         | 2 | EGFR and pan-negative |
| cg06119575 | 9 | 108424905 | TAL2         | 2 | EGFR and pan-negative |
| cg05156613 | 9 | 111618129 | ACTL7B       | 2 | EGFR and pan-negative |
| cg05485060 | 9 | 111776779 | CTNNAL1      | 2 | EGFR and pan-negative |
| cg10994430 | 9 | 112542080 | PALM2        | 2 | EGFR and pan-negative |
| cg15195276 | 9 | 113799936 | LPAR1        | 2 | EGFR and pan-negative |
| cg14563260 | 9 | 113801320 | LPAR1        | 2 | EGFR and pan-negative |
| cg23964386 | 9 | 114362249 | PTGR1        | 2 | EGFR and pan-negative |
| cg10726357 | 9 | 115653543 | SLC46A2      | 2 | EGFR and pan-negative |
| cg17749443 | 9 | 115819190 | ZFP37        | 2 | EGFR and pan-negative |
| cg24012708 | 9 | 116138128 | HDHD3        | 2 | EGFR and pan-negative |
| cg19944367 | 9 | 116223775 | RGS3         | 2 | EGFR and pan-negative |
| cg26354398 | 9 | 116224036 | RGS3         | 2 | EGFR and pan-negative |
| cg06630567 | 9 | 116840435 | AMBP         | 2 | EGFR and pan-negative |
| cg09944147 | 9 | 116918247 | COL27A1      | 2 | EGFR and pan-negative |
| cg19556572 | 9 | 117156701 | AKNA         | 2 | EGFR and pan-negative |
| cg11809085 | 9 | 117567756 | TNFSF15      | 2 | EGFR and pan-negative |
| cg10791260 | 9 | 117568588 | TNFSF15      | 2 | EGFR and pan-negative |
| cg02873524 | 9 | 118916493 | PAPPA        | 2 | EGFR and pan-negative |
| cg00121640 | 9 | 120176515 | ASTN2        | 2 | EGFR and pan-negative |
| cg12024292 | 9 | 120177979 | ASTN2        | 2 | EGFR and pan-negative |
| cg25935911 | 9 | 122132261 | DBC1         | 2 | EGFR and pan-negative |
| cg15551881 | 9 | 123688715 | TRAF1        | 2 | EGFR and pan-negative |
| cg17071957 | 9 | 124029926 | GSN          | 2 | EGFR and pan-negative |
| cg18676053 | 9 | 124133094 | STOM         | 2 | EGFR and pan-negative |
| cg07981910 | 9 | 124461412 | DAB2IP       | 2 | EGFR and pan-negative |
| cg11527279 | 9 | 124854846 | TLL11        | 2 | EGFR and pan-negative |
| cg06866657 | 9 | 124990754 | LHX6         | 2 | EGFR and pan-negative |
| cg14598387 | 9 | 125289357 | OR1N1        | 2 | EGFR and pan-negative |
| cg16473288 | 9 | 125290120 | OR1N1        | 2 | EGFR and pan-negative |
| cg15209169 | 9 | 125702779 | RABGAP1      | 2 | EGFR and pan-negative |
| cg07763768 | 9 | 125877923 | MIR600HG     | 2 | EGFR and pan-negative |
| cg18904346 | 9 | 126773656 | LHX2         | 2 | EGFR and pan-negative |
| cg21468416 | 9 | 127019914 | NEK6         | 2 | EGFR and pan-negative |
| cg16666160 | 9 | 127269631 | NR5A1        | 2 | EGFR and pan-negative |
| cg00691625 | 9 | 127269807 | NR5A1        | 2 | EGFR and pan-negative |
| cg18506679 | 9 | 127563860 | OLFML2A      | 2 | EGFR and pan-negative |
| cg00620024 | 9 | 127952891 | PPP6C        | 2 | EGFR and pan-negative |
| cg09660171 | 9 | 129375847 | LMX1B        | 2 | EGFR and pan-negative |
| cg18453621 | 9 | 129376904 | LMX1B        | 2 | EGFR and pan-negative |
| cg11213150 | 9 | 129884457 | ANGPTL2      | 2 | EGFR and pan-negative |
| cg09427311 | 9 | 129885730 | ANGPTL2      | 2 | EGFR and pan-negative |
| cg00342530 | 9 | 130027020 | GARNL3       | 2 | EGFR and pan-negative |
| cg11714502 | 9 | 130640212 | AK1          | 2 | EGFR and pan-negative |
| cg05517711 | 9 | 130662451 | ST6GALNAC6   | 2 | EGFR and pan-negative |
| cg02431687 | 9 | 130828652 | NAIF1        | 2 | EGFR and pan-negative |
| cg09296212 | 9 | 130828969 | NAIF1        | 2 | EGFR and pan-negative |
| cg24730207 | 9 | 130891743 | PTGES2-AS1   | 2 | EGFR and pan-negative |
| cg01871963 | 9 | 130910995 | LCN2         | 2 | EGFR and pan-negative |
| cg22438810 | 9 | 130911792 | LCN2         | 2 | EGFR and pan-negative |
| cg24392274 | 9 | 130921842 | C9orf16      | 2 | EGFR and pan-negative |
| cg13316424 | 9 | 130968009 | CIZ1         | 2 | EGFR and pan-negative |
| cg12867448 | 9 | 131217480 | ODF2         | 2 | EGFR and pan-negative |
| cg24440147 | 9 | 131464516 | PKN3         | 2 | EGFR and pan-negative |
| cg23003832 | 9 | 131486918 | LOC100506100 | 2 | EGFR and pan-negative |
| cg02205739 | 9 | 132427570 | PRRX2        | 2 | EGFR and pan-negative |
| cg04713521 | 9 | 132428538 | PRRX2        | 2 | EGFR and pan-negative |
| cg17509612 | 9 | 132598774 | USP20        | 2 | EGFR and pan-negative |
| cg23771929 | 9 | 132934195 | NCS1         | 2 | EGFR and pan-negative |
| cg12539975 | 9 | 133539583 | PRDM12       | 2 | EGFR and pan-negative |
| cg09191327 | 9 | 133540108 | PRDM12       | 2 | EGFR and pan-negative |
| cg23152772 | 9 | 133813632 | FIBCD1       | 2 | EGFR and pan-negative |
| cg03776060 | 9 | 133972575 | AIF1L        | 2 | EGFR and pan-negative |
| cg09553448 | 9 | 134000424 | NUP214       | 2 | EGFR and pan-negative |
| cg18636641 | 9 | 134165268 | PPAPDC3      | 2 | EGFR and pan-negative |
| cg06353948 | 9 | 135231016 | SETX         | 2 | EGFR and pan-negative |
| cg15729869 | 9 | 135457839 | BARHL1       | 2 | EGFR and pan-negative |
| cg12622986 | 9 | 135458173 | BARHL1       | 2 | EGFR and pan-negative |
| cg09986574 | 9 | 135544256 | GTF3C4       | 2 | EGFR and pan-negative |
| cg10676060 | 9 | 135546789 | DDX31        | 2 | EGFR and pan-negative |
| cg03382797 | 9 | 135755363 | C9orf9       | 2 | EGFR and pan-negative |
| cg19393006 | 9 | 135820767 | TSC1         | 2 | EGFR and pan-negative |
| cg17961200 | 9 | 135937572 | CEL          | 2 | EGFR and pan-negative |
| cg06974755 | 9 | 135996931 | RALGDS       | 2 | EGFR and pan-negative |
| cg16872071 | 9 | 135997155 | RALGDS       | 2 | EGFR and pan-negative |
| cg01169778 | 9 | 136038690 | GBGT1        | 2 | EGFR and pan-negative |
| cg15538820 | 9 | 136084818 | OBP2B        | 2 | EGFR and pan-negative |

|            |    |           |           |   |                       |
|------------|----|-----------|-----------|---|-----------------------|
| cg20017995 | 9  | 136216076 | SNORD24   | 2 | EGFR and pan-negative |
| cg16112945 | 9  | 136285806 | ADAMTS13  | 2 | EGFR and pan-negative |
| cg14802951 | 9  | 136287409 | ADAMTS13  | 2 | EGFR and pan-negative |
| cg10570177 | 9  | 136324586 | CACFD1    | 2 | EGFR and pan-negative |
| cg25580018 | 9  | 136399808 | ADAMTSL2  | 2 | EGFR and pan-negative |
| cg14201417 | 9  | 136400057 | ADAMTSL2  | 2 | EGFR and pan-negative |
| cg25020204 | 9  | 136500234 | DBH       | 2 | EGFR and pan-negative |
| cg07824742 | 9  | 136501784 | DBH       | 2 | EGFR and pan-negative |
| cg21122774 | 9  | 136604996 | SARDH     | 2 | EGFR and pan-negative |
| cg11466485 | 9  | 136605868 | SARDH     | 2 | EGFR and pan-negative |
| cg26024843 | 9  | 137533949 | COL5A1    | 2 | EGFR and pan-negative |
| cg06244417 | 9  | 137809628 | FCN1      | 2 | EGFR and pan-negative |
| cg08268099 | 9  | 137966584 | OLFM1     | 2 | EGFR and pan-negative |
| cg27286999 | 9  | 137967306 | OLFM1     | 2 | EGFR and pan-negative |
| cg12438037 | 9  | 138393570 | MRPS2     | 2 | EGFR and pan-negative |
| cg23815000 | 9  | 138413012 | LCN1      | 2 | EGFR and pan-negative |
| cg03264414 | 9  | 138453697 | PAEP      | 2 | EGFR and pan-negative |
| cg12004206 | 9  | 138987102 | NACC2     | 2 | EGFR and pan-negative |
| cg22747092 | 9  | 138987818 | NACC2     | 2 | EGFR and pan-negative |
| cg20300246 | 9  | 139096747 | LHX3      | 2 | EGFR and pan-negative |
| cg14934821 | 9  | 139228820 | GPSM1     | 2 | EGFR and pan-negative |
| cg04305913 | 9  | 139228912 | GPSM1     | 2 | EGFR and pan-negative |
| cg20776317 | 9  | 139292793 | SNAPC4    | 2 | EGFR and pan-negative |
| cg08529852 | 9  | 139557920 | EGFL7     | 2 | EGFR and pan-negative |
| cg07078114 | 9  | 139606202 | FAM69B    | 2 | EGFR and pan-negative |
| cg11873854 | 9  | 139642875 | LCN6      | 2 | EGFR and pan-negative |
| cg17074151 | 9  | 139660381 | LCN15     | 2 | EGFR and pan-negative |
| cg19795898 | 9  | 139693196 | KIAA1984  | 2 | EGFR and pan-negative |
| cg17185543 | 9  | 139760589 | EDF1      | 2 | EGFR and pan-negative |
| cg02332492 | 9  | 139840678 | C8G       | 2 | EGFR and pan-negative |
| cg00563932 | 9  | 139871049 | PTGDS     | 2 | EGFR and pan-negative |
| cg01126560 | 9  | 139886304 | C9orf142  | 2 | EGFR and pan-negative |
| cg25934198 | 9  | 139920781 | C9orf139  | 2 | EGFR and pan-negative |
| cg02679745 | 9  | 139927646 | FUT7      | 2 | EGFR and pan-negative |
| cg04582938 | 9  | 139971429 | UAP1L1    | 2 | EGFR and pan-negative |
| cg03109047 | 9  | 140032686 | GRIN1     | 2 | EGFR and pan-negative |
| cg26681123 | 9  | 140125311 | SLC34A3   | 2 | EGFR and pan-negative |
| cg17361154 | 9  | 140336563 | ENTPD8    | 2 | EGFR and pan-negative |
| cg01970325 | 9  | 140354241 | NSMF      | 2 | EGFR and pan-negative |
| cg26374101 | 9  | 140500813 | ARRDC1    | 2 | EGFR and pan-negative |
| cg05307923 | 10 | 1779667   | ADARB2    | 2 | EGFR and pan-negative |
| cg14590817 | 10 | 1779730   | ADARB2    | 2 | EGFR and pan-negative |
| cg13599477 | 10 | 5488485   | NET1      | 2 | EGFR and pan-negative |
| cg24392574 | 10 | 5541423   | CALML5    | 2 | EGFR and pan-negative |
| cg21130124 | 10 | 5542328   | CALML5    | 2 | EGFR and pan-negative |
| cg18705776 | 10 | 5565829   | CALML3    | 2 | EGFR and pan-negative |
| cg11733245 | 10 | 6104312   | IL2RA     | 2 | EGFR and pan-negative |
| cg06224510 | 10 | 7745454   | ITIH2     | 2 | EGFR and pan-negative |
| cg00779924 | 10 | 8094641   | GATA3-AS1 | 2 | EGFR and pan-negative |
| cg04765277 | 10 | 8094679   | GATA3-AS1 | 2 | EGFR and pan-negative |
| cg06230736 | 10 | 8096650   | GATA3     | 2 | EGFR and pan-negative |
| cg15777781 | 10 | 11047271  | CELF2     | 2 | EGFR and pan-negative |
| cg22750254 | 10 | 13043421  | CCDC3     | 2 | EGFR and pan-negative |
| cg14784653 | 10 | 13545008  | BEND7     | 2 | EGFR and pan-negative |
| cg25464840 | 10 | 14372910  | FRMD4A    | 2 | EGFR and pan-negative |
| cg02876062 | 10 | 14816654  | FAM107B   | 2 | EGFR and pan-negative |
| cg12285118 | 10 | 14816973  | FAM107B   | 2 | EGFR and pan-negative |
| cg27465849 | 10 | 15084843  | OLAH      | 2 | EGFR and pan-negative |
| cg04001802 | 10 | 15085279  | OLAH      | 2 | EGFR and pan-negative |
| cg00260778 | 10 | 15140412  | C10orf111 | 2 | EGFR and pan-negative |
| cg18173454 | 10 | 15209775  | NMT2      | 2 | EGFR and pan-negative |
| cg04451988 | 10 | 15412706  | FAM171A1  | 2 | EGFR and pan-negative |
| cg16902509 | 10 | 15761312  | ITGA8     | 2 | EGFR and pan-negative |
| cg13492340 | 10 | 15762222  | ITGA8     | 2 | EGFR and pan-negative |
| cg10707565 | 10 | 17171695  | CUBN      | 2 | EGFR and pan-negative |
| cg19579782 | 10 | 17243880  | TRDMT1    | 2 | EGFR and pan-negative |
| cg26550234 | 10 | 18239793  | SLC39A12  | 2 | EGFR and pan-negative |
| cg18408326 | 10 | 18429037  | CACNB2    | 2 | EGFR and pan-negative |
| cg01805540 | 10 | 18429749  | CACNB2    | 2 | EGFR and pan-negative |
| cg13149307 | 10 | 20104452  | PLXDC2    | 2 | EGFR and pan-negative |
| cg12563178 | 10 | 20105641  | PLXDC2    | 2 | EGFR and pan-negative |
| cg04180868 | 10 | 25241462  | PRTFDC1   | 2 | EGFR and pan-negative |
| cg08441170 | 10 | 26223100  | MYO3A     | 2 | EGFR and pan-negative |
| cg04599297 | 10 | 26505442  | GAD2      | 2 | EGFR and pan-negative |
| cg17665193 | 10 | 26506008  | GAD2      | 2 | EGFR and pan-negative |
| cg06898923 | 10 | 27792905  | RAB18     | 2 | EGFR and pan-negative |
| cg02512226 | 10 | 28288192  | ARMC4     | 2 | EGFR and pan-negative |
| cg17749384 | 10 | 28571186  | MPP7      | 2 | EGFR and pan-negative |
| cg16408970 | 10 | 28965584  | BAMBI     | 2 | EGFR and pan-negative |
| cg01656216 | 10 | 31273710  | ZNF438    | 2 | EGFR and pan-negative |
| cg24861272 | 10 | 31607153  | ZEB1-AS1  | 2 | EGFR and pan-negative |
| cg12870705 | 10 | 33624623  | NRP1      | 2 | EGFR and pan-negative |
| cg07452799 | 10 | 35103869  | PARD3     | 2 | EGFR and pan-negative |
| cg00042156 | 10 | 42970842  | LINC00839 | 2 | EGFR and pan-negative |
| cg21096915 | 10 | 42971209  | LINC00839 | 2 | EGFR and pan-negative |
| cg05621401 | 10 | 43572065  | RET       | 2 | EGFR and pan-negative |
| cg04402875 | 10 | 43572795  | RET       | 2 | EGFR and pan-negative |
| cg25081201 | 10 | 43867071  | FXYD4     | 2 | EGFR and pan-negative |
| cg12619162 | 10 | 43867155  | FXYD4     | 2 | EGFR and pan-negative |
| cg15321211 | 10 | 43905515  | HNRNPF    | 2 | EGFR and pan-negative |
| cg25692323 | 10 | 44101569  | ZNF485    | 2 | EGFR and pan-negative |
| cg20491707 | 10 | 47083283  | NPY4R     | 2 | EGFR and pan-negative |
| cg17964955 | 10 | 48390936  | RBP3      | 2 | EGFR and pan-negative |
| cg24053375 | 10 | 48392130  | RBP3      | 2 | EGFR and pan-negative |
| cg21115977 | 10 | 48416510  | GDF2      | 2 | EGFR and pan-negative |

|            |    |          |                  |   |                       |
|------------|----|----------|------------------|---|-----------------------|
| cg07773116 | 10 | 48438500 | <i>GDF10</i>     | 2 | EGFR and pan-negative |
| cg16192575 | 10 | 48828106 | <i>PTPN20A</i>   | 2 | EGFR and pan-negative |
| cg02222362 | 10 | 48828109 | <i>PTPN20B</i>   | 2 | EGFR and pan-negative |
| cg02569613 | 10 | 50323127 | <i>VSTM4</i>     | 2 | EGFR and pan-negative |
| cg18592174 | 10 | 50817306 | <i>CHAT</i>      | 2 | EGFR and pan-negative |
| cg11389172 | 10 | 50818299 | <i>SLC18A3</i>   | 2 | EGFR and pan-negative |
| cg06222851 | 10 | 50970358 | <i>OGDHL</i>     | 2 | EGFR and pan-negative |
| cg24356544 | 10 | 50970863 | <i>OGDHL</i>     | 2 | EGFR and pan-negative |
| cg17030820 | 10 | 51549260 | <i>MSMB</i>      | 2 | EGFR and pan-negative |
| cg21033494 | 10 | 51550114 | <i>MSMB</i>      | 2 | EGFR and pan-negative |
| cg25683904 | 10 | 51622198 | <i>TIMM23</i>    | 2 | EGFR and pan-negative |
| cg16792160 | 10 | 52008593 | <i>ASAH2</i>     | 2 | EGFR and pan-negative |
| cg09019938 | 10 | 52834498 | <i>PRKG1</i>     | 2 | EGFR and pan-negative |
| cg13882988 | 10 | 54531345 | <i>MBL2</i>      | 2 | EGFR and pan-negative |
| cg27418851 | 10 | 54531653 | <i>MBL2</i>      | 2 | EGFR and pan-negative |
| cg20588045 | 10 | 56561096 | <i>PCDH15</i>    | 2 | EGFR and pan-negative |
| cg25946758 | 10 | 60936025 | <i>PHYHIPL</i>   | 2 | EGFR and pan-negative |
| cg10615091 | 10 | 61122313 | <i>FAM13C</i>    | 2 | EGFR and pan-negative |
| cg22639768 | 10 | 61122535 | <i>FAM13C</i>    | 2 | EGFR and pan-negative |
| cg15591678 | 10 | 64134155 | <i>ZNF365</i>    | 2 | EGFR and pan-negative |
| cg19355190 | 10 | 64575798 | <i>EGR2</i>      | 2 | EGFR and pan-negative |
| cg21948169 | 10 | 70320051 | <i>TET1</i>      | 2 | EGFR and pan-negative |
| cg19439331 | 10 | 70320470 | <i>TET1</i>      | 2 | EGFR and pan-negative |
| cg17342283 | 10 | 70847882 | <i>SRGN</i>      | 2 | EGFR and pan-negative |
| cg16001913 | 10 | 71029644 | <i>HK1</i>       | 2 | EGFR and pan-negative |
| cg15278682 | 10 | 71175852 | <i>TACR2</i>     | 2 | EGFR and pan-negative |
| cg26984805 | 10 | 71176501 | <i>TACR2</i>     | 2 | EGFR and pan-negative |
| cg03425110 | 10 | 71333037 | <i>NEUROG3</i>   | 2 | EGFR and pan-negative |
| cg22368262 | 10 | 71390173 | <i>C10orf35</i>  | 2 | EGFR and pan-negative |
| cg23620639 | 10 | 71561211 | <i>COL13A1</i>   | 2 | EGFR and pan-negative |
| cg17163751 | 10 | 71812596 | <i>H2AFY2</i>    | 2 | EGFR and pan-negative |
| cg14617642 | 10 | 71812630 | <i>H2AFY2</i>    | 2 | EGFR and pan-negative |
| cg09914304 | 10 | 72362292 | <i>PRF1</i>      | 2 | EGFR and pan-negative |
| cg02374486 | 10 | 72362809 | <i>PRF1</i>      | 2 | EGFR and pan-negative |
| cg02503850 | 10 | 72432552 | <i>ADAMTS14</i>  | 2 | EGFR and pan-negative |
| cg10548978 | 10 | 72545053 | <i>TBATA</i>     | 2 | EGFR and pan-negative |
| cg01560871 | 10 | 72545424 | <i>TBATA</i>     | 2 | EGFR and pan-negative |
| cg05871136 | 10 | 72971961 | <i>UNC5B</i>     | 2 | EGFR and pan-negative |
| cg18858343 | 10 | 72972901 | <i>UNC5B</i>     | 2 | EGFR and pan-negative |
| cg19241744 | 10 | 73078790 | <i>SLC29A3</i>   | 2 | EGFR and pan-negative |
| cg19731268 | 10 | 73724697 | <i>CHST3</i>     | 2 | EGFR and pan-negative |
| cg05998983 | 10 | 74653449 | <i>OIT3</i>      | 2 | EGFR and pan-negative |
| cg02044879 | 10 | 74714935 | <i>PLA2G12B</i>  | 2 | EGFR and pan-negative |
| cg18180783 | 10 | 75402320 | <i>MYOZ1</i>     | 2 | EGFR and pan-negative |
| cg07127957 | 10 | 75411571 | <i>SYNPO2L</i>   | 2 | EGFR and pan-negative |
| cg16540259 | 10 | 75572220 | <i>NDST2</i>     | 2 | EGFR and pan-negative |
| cg05510041 | 10 | 75758427 | <i>VCL</i>       | 2 | EGFR and pan-negative |
| cg20721467 | 10 | 76597927 | <i>KAT6B</i>     | 2 | EGFR and pan-negative |
| cg04834572 | 10 | 76868766 | <i>DUSP13</i>    | 2 | EGFR and pan-negative |
| cg09936762 | 10 | 80959688 | <i>ZMIZ1</i>     | 2 | EGFR and pan-negative |
| cg03600318 | 10 | 81708991 | <i>SFTPD</i>     | 2 | EGFR and pan-negative |
| cg08458487 | 10 | 81709191 | <i>SFTPD</i>     | 2 | EGFR and pan-negative |
| cg19423196 | 10 | 82049429 | <i>MAT1A</i>     | 2 | EGFR and pan-negative |
| cg18292394 | 10 | 82049450 | <i>MAT1A</i>     | 2 | EGFR and pan-negative |
| cg18396533 | 10 | 82116208 | <i>DYDC1</i>     | 2 | EGFR and pan-negative |
| cg17703212 | 10 | 82117257 | <i>DYDC2</i>     | 2 | EGFR and pan-negative |
| cg01851208 | 10 | 82168043 | <i>FAM213A</i>   | 2 | EGFR and pan-negative |
| cg26391080 | 10 | 82297397 | <i>SH2D4B</i>    | 2 | EGFR and pan-negative |
| cg04126866 | 10 | 85932763 | <i>C10orf99</i>  | 2 | EGFR and pan-negative |
| cg01558777 | 10 | 85933798 | <i>C10orf99</i>  | 2 | EGFR and pan-negative |
| cg26717133 | 10 | 85953953 | <i>CDHR1</i>     | 2 | EGFR and pan-negative |
| cg16211684 | 10 | 85954622 | <i>CDHR1</i>     | 2 | EGFR and pan-negative |
| cg17833578 | 10 | 86001560 | <i>LRIT1</i>     | 2 | EGFR and pan-negative |
| cg09261262 | 10 | 88414554 | <i>OPN4</i>      | 2 | EGFR and pan-negative |
| cg05046097 | 10 | 88717926 | <i>SNCG</i>      | 2 | EGFR and pan-negative |
| cg21012874 | 10 | 88718393 | <i>SNCG</i>      | 2 | EGFR and pan-negative |
| cg12261786 | 10 | 88727830 | <i>ADIRF</i>     | 2 | EGFR and pan-negative |
| cg08859916 | 10 | 89624102 | <i>KLLN</i>      | 2 | EGFR and pan-negative |
| cg06812977 | 10 | 90343036 | <i>RNLS</i>      | 2 | EGFR and pan-negative |
| cg06981182 | 10 | 90343208 | <i>RNLS</i>      | 2 | EGFR and pan-negative |
| cg00098162 | 10 | 90619573 | <i>0</i>         | 2 | EGFR and pan-negative |
| cg10894512 | 10 | 90712478 | <i>ACTA2</i>     | 2 | EGFR and pan-negative |
| cg07436807 | 10 | 90712767 | <i>ACTA2</i>     | 2 | EGFR and pan-negative |
| cg23410627 | 10 | 90966807 | <i>CH25H</i>     | 2 | EGFR and pan-negative |
| cg09186006 | 10 | 91295299 | <i>SLC16A12</i>  | 2 | EGFR and pan-negative |
| cg12005098 | 10 | 91295338 | <i>SLC16A12</i>  | 2 | EGFR and pan-negative |
| cg06291867 | 10 | 92617162 | <i>HTR7</i>      | 2 | EGFR and pan-negative |
| cg09775312 | 10 | 93392839 | <i>PPP1R3C</i>   | 2 | EGFR and pan-negative |
| cg21017752 | 10 | 93393203 | <i>PPP1R3C</i>   | 2 | EGFR and pan-negative |
| cg26404725 | 10 | 94819802 | <i>CYP26C1</i>   | 2 | EGFR and pan-negative |
| cg20322977 | 10 | 94821085 | <i>CYP26C1</i>   | 2 | EGFR and pan-negative |
| cg12331389 | 10 | 95360736 | <i>RBP4</i>      | 2 | EGFR and pan-negative |
| cg19635695 | 10 | 95372445 | <i>PDE6C</i>     | 2 | EGFR and pan-negative |
| cg06852652 | 10 | 96442031 | <i>CYP2C18</i>   | 2 | EGFR and pan-negative |
| cg04189838 | 10 | 96523347 | <i>CYP2C19</i>   | 2 | EGFR and pan-negative |
| cg26822241 | 10 | 96697661 | <i>CYP2C9</i>    | 2 | EGFR and pan-negative |
| cg12647587 | 10 | 96954252 | <i>C10orf129</i> | 2 | EGFR and pan-negative |
| cg06542614 | 10 | 97051255 | <i>PDLIM1</i>    | 2 | EGFR and pan-negative |
| cg25092283 | 10 | 97321585 | <i>SORBS1</i>    | 2 | EGFR and pan-negative |
| cg16779976 | 10 | 98031125 | <i>BLNK</i>      | 2 | EGFR and pan-negative |
| cg27157038 | 10 | 98063999 | <i>DNMT</i>      | 2 | EGFR and pan-negative |
| cg07143898 | 10 | 98945300 | <i>SLIT1</i>     | 2 | EGFR and pan-negative |
| cg17296078 | 10 | 99259721 | <i>UBTD1</i>     | 2 | EGFR and pan-negative |
| cg02676865 | 10 | 99259738 | <i>UBTD1</i>     | 2 | EGFR and pan-negative |
| cg12718440 | 10 | 99393576 | <i>MORN4</i>     | 2 | EGFR and pan-negative |

|            |    |           |           |   |                       |
|------------|----|-----------|-----------|---|-----------------------|
| cg25355803 | 10 | 99473032  | MARVELD1  | 2 | EGFR and pan-negative |
| cg09874752 | 10 | 99531309  | SFRP5     | 2 | EGFR and pan-negative |
| cg05937453 | 10 | 99531765  | SFRP5     | 2 | EGFR and pan-negative |
| cg25156443 | 10 | 99531929  | SFRP5     | 2 | EGFR and pan-negative |
| cg08397758 | 10 | 100174853 | PYROXD2   | 2 | EGFR and pan-negative |
| cg03852570 | 10 | 100175106 | PYROXD2   | 2 | EGFR and pan-negative |
| cg20340596 | 10 | 100206925 | HPS1      | 2 | EGFR and pan-negative |
| cg03388193 | 10 | 100996070 | HPSE2     | 2 | EGFR and pan-negative |
| cg15430659 | 10 | 101090558 | CNNM1     | 2 | EGFR and pan-negative |
| cg15457079 | 10 | 101841816 | CPN1      | 2 | EGFR and pan-negative |
| cg10365880 | 10 | 102089681 | PKD2L1    | 2 | EGFR and pan-negative |
| cg05958582 | 10 | 102090366 | PKD2L1    | 2 | EGFR and pan-negative |
| cg26705561 | 10 | 102279791 | SEC31B    | 2 | EGFR and pan-negative |
| cg26991946 | 10 | 102732224 | SEMA4G    | 2 | EGFR and pan-negative |
| cg05322019 | 10 | 102732323 | SEMA4G    | 2 | EGFR and pan-negative |
| cg07638935 | 10 | 102821427 | KAZALD1   | 2 | EGFR and pan-negative |
| cg11498156 | 10 | 102890145 | TLX1NB    | 2 | EGFR and pan-negative |
| cg03285457 | 10 | 102988529 | LBX1      | 2 | EGFR and pan-negative |
| cg16584573 | 10 | 103535637 | FGF8      | 2 | EGFR and pan-negative |
| cg16248277 | 10 | 103536063 | FGF8      | 2 | EGFR and pan-negative |
| cg11849692 | 10 | 103875969 | LDB1      | 2 | EGFR and pan-negative |
| cg23402444 | 10 | 104178866 | PSD       | 2 | EGFR and pan-negative |
| cg25117362 | 10 | 104221598 | TMEM180   | 2 | EGFR and pan-negative |
| cg09405083 | 10 | 104536121 | WBP1L     | 2 | EGFR and pan-negative |
| cg00035347 | 10 | 104953608 | NT5C2     | 2 | EGFR and pan-negative |
| cg25764191 | 10 | 105037215 | INA       | 2 | EGFR and pan-negative |
| cg27217148 | 10 | 105111158 | PCGF6     | 2 | EGFR and pan-negative |
| cg09155001 | 10 | 105218401 | CALHM1    | 2 | EGFR and pan-negative |
| cg02324920 | 10 | 105253152 | NEURL     | 2 | EGFR and pan-negative |
| cg13448625 | 10 | 105845238 | COL17A1   | 2 | EGFR and pan-negative |
| cg13553455 | 10 | 105846002 | COL17A1   | 2 | EGFR and pan-negative |
| cg25250998 | 10 | 106028373 | MIR4482-1 | 2 | EGFR and pan-negative |
| cg09551147 | 10 | 106399957 | SORCS3    | 2 | EGFR and pan-negative |
| cg16787600 | 10 | 106400880 | SORCS3    | 2 | EGFR and pan-negative |
| cg13017345 | 10 | 111966029 | MXI1      | 2 | EGFR and pan-negative |
| cg21022395 | 10 | 112722440 | SHOC2     | 2 | EGFR and pan-negative |
| cg26926521 | 10 | 112837240 | ADRA2A    | 2 | EGFR and pan-negative |
| cg13849691 | 10 | 114133304 | ACSL5     | 2 | EGFR and pan-negative |
| cg18833140 | 10 | 115312553 | HABP2     | 2 | EGFR and pan-negative |
| cg26656452 | 10 | 115313165 | HABP2     | 2 | EGFR and pan-negative |
| cg01658815 | 10 | 116444040 | ABLIM1    | 2 | EGFR and pan-negative |
| cg04335339 | 10 | 116853118 | ATRN1     | 2 | EGFR and pan-negative |
| cg23898073 | 10 | 118032948 | GFRA1     | 2 | EGFR and pan-negative |
| cg12087643 | 10 | 118033370 | GFRA1     | 2 | EGFR and pan-negative |
| cg11812202 | 10 | 118305409 | PNLIP     | 2 | EGFR and pan-negative |
| cg27600794 | 10 | 118349430 | PNLIPRP1  | 2 | EGFR and pan-negative |
| cg16272420 | 10 | 118381044 | PNLIPRP2  | 2 | EGFR and pan-negative |
| cg07621046 | 10 | 118429658 | C10orf82  | 2 | EGFR and pan-negative |
| cg25229305 | 10 | 118956639 | KCNK18    | 2 | EGFR and pan-negative |
| cg07637239 | 10 | 118957259 | KCNK18    | 2 | EGFR and pan-negative |
| cg00498305 | 10 | 119000236 | SLC18A2   | 2 | EGFR and pan-negative |
| cg00512279 | 10 | 119000991 | SLC18A2   | 2 | EGFR and pan-negative |
| cg17797815 | 10 | 119806972 | CASC2     | 2 | EGFR and pan-negative |
| cg17028039 | 10 | 123357695 | FGFR2     | 2 | EGFR and pan-negative |
| cg09772154 | 10 | 123358284 | FGFR2     | 2 | EGFR and pan-negative |
| cg25920792 | 10 | 124220729 | HTRA1     | 2 | EGFR and pan-negative |
| cg10588377 | 10 | 124221799 | HTRA1     | 2 | EGFR and pan-negative |
| cg27015047 | 10 | 124320805 | DMBT1     | 2 | EGFR and pan-negative |
| cg07036530 | 10 | 125425262 | GPR26     | 2 | EGFR and pan-negative |
| cg08082692 | 10 | 125805493 | CHST15    | 2 | EGFR and pan-negative |
| cg12815841 | 10 | 126150822 | LHPP      | 2 | EGFR and pan-negative |
| cg17607024 | 10 | 126630765 | ZRANB1    | 2 | EGFR and pan-negative |
| cg20688340 | 10 | 127464237 | MMP21     | 2 | EGFR and pan-negative |
| cg19346193 | 10 | 127513190 | BCCIP     | 2 | EGFR and pan-negative |
| cg06507244 | 10 | 127569494 | DHX32     | 2 | EGFR and pan-negative |
| cg12869240 | 10 | 127569973 | DHX32     | 2 | EGFR and pan-negative |
| cg11668923 | 10 | 128076936 | ADAM12    | 2 | EGFR and pan-negative |
| cg13488201 | 10 | 128077323 | ADAM12    | 2 | EGFR and pan-negative |
| cg00623593 | 10 | 128767610 | DOCK1     | 2 | EGFR and pan-negative |
| cg13434852 | 10 | 128768181 | DOCK1     | 2 | EGFR and pan-negative |
| cg23817637 | 10 | 129691429 | CLRN3     | 2 | EGFR and pan-negative |
| cg24678429 | 10 | 129705785 | PTPRE     | 2 | EGFR and pan-negative |
| cg17929627 | 10 | 129924035 | MKI67     | 2 | EGFR and pan-negative |
| cg02330106 | 10 | 131264840 | MGMT      | 2 | EGFR and pan-negative |
| cg19706602 | 10 | 131265435 | MGMT      | 2 | EGFR and pan-negative |
| cg26201213 | 10 | 131265796 | MGMT      | 2 | EGFR and pan-negative |
| cg12040555 | 10 | 131321830 | MGMT      | 2 | EGFR and pan-negative |
| cg04473030 | 10 | 131354782 | MGMT      | 2 | EGFR and pan-negative |
| cg02803836 | 10 | 131412507 | MGMT      | 2 | EGFR and pan-negative |
| cg16698623 | 10 | 131412968 | MGMT      | 2 | EGFR and pan-negative |
| cg06139836 | 10 | 131762961 | EBF3      | 2 | EGFR and pan-negative |
| cg03943081 | 10 | 133110646 | TCERG1L   | 2 | EGFR and pan-negative |
| cg22473973 | 10 | 133794911 | BNIP3     | 2 | EGFR and pan-negative |
| cg22045288 | 10 | 134258421 | C10orf91  | 2 | EGFR and pan-negative |
| cg09260089 | 10 | 134599860 | NKX6-2    | 2 | EGFR and pan-negative |
| cg03354772 | 10 | 134756503 | TTC40     | 2 | EGFR and pan-negative |
| cg19626078 | 10 | 134973796 | KNDC1     | 2 | EGFR and pan-negative |
| cg12955583 | 10 | 134974048 | KNDC1     | 2 | EGFR and pan-negative |
| cg09053680 | 10 | 135044114 | UTF1      | 2 | EGFR and pan-negative |
| cg20472189 | 10 | 135051475 | VENTX     | 2 | EGFR and pan-negative |
| cg17770886 | 10 | 135121331 | ZNF511    | 2 | EGFR and pan-negative |
| cg07908874 | 10 | 135123006 | TUBGCP2   | 2 | EGFR and pan-negative |
| cg21965997 | 10 | 135150367 | CALY      | 2 | EGFR and pan-negative |
| cg10845200 | 10 | 135150485 | CALY      | 2 | EGFR and pan-negative |
| cg10742801 | 10 | 135161047 | PRAP1     | 2 | EGFR and pan-negative |

|            |    |           |            |   |                       |
|------------|----|-----------|------------|---|-----------------------|
| cg00436603 | 10 | 135340740 | CYP2E1     | 2 | EGFR and pan-negative |
| cg17676129 | 10 | 135382545 | SYCE1      | 2 | EGFR and pan-negative |
| cg10335112 | 11 | 195572    | ODF3       | 2 | EGFR and pan-negative |
| cg16225091 | 11 | 197224    | ODF3       | 2 | EGFR and pan-negative |
| cg14885742 | 11 | 320956    | IFITM3     | 2 | EGFR and pan-negative |
| cg24194132 | 11 | 368966    | B4GALNT4   | 2 | EGFR and pan-negative |
| cg16004226 | 11 | 369875    | B4GALNT4   | 2 | EGFR and pan-negative |
| cg08314660 | 11 | 394199    | PKP3       | 2 | EGFR and pan-negative |
| cg00935364 | 11 | 394607    | PKP3       | 2 | EGFR and pan-negative |
| cg06417962 | 11 | 507970    | RNH1       | 2 | EGFR and pan-negative |
| cg06921282 | 11 | 536299    | HRAS       | 2 | EGFR and pan-negative |
| cg27158867 | 11 | 537638    | LRRC56     | 2 | EGFR and pan-negative |
| cg18714560 | 11 | 628302    | SCT        | 2 | EGFR and pan-negative |
| cg05782292 | 11 | 628318    | SCT        | 2 | EGFR and pan-negative |
| cg06825142 | 11 | 637170    | DRD4       | 2 | EGFR and pan-negative |
| cg16614500 | 11 | 694704    | TMEM80     | 2 | EGFR and pan-negative |
| cg09553358 | 11 | 790184    | CEND1      | 2 | EGFR and pan-negative |
| cg20225915 | 11 | 805726    | PIDD       | 2 | EGFR and pan-negative |
| cg22009923 | 11 | 832065    | CD151      | 2 | EGFR and pan-negative |
| cg03116740 | 11 | 841335    | POLR2L     | 2 | EGFR and pan-negative |
| cg11173246 | 11 | 841376    | POLR2L     | 2 | EGFR and pan-negative |
| cg07066326 | 11 | 910094    | CHID1      | 2 | EGFR and pan-negative |
| cg01321151 | 11 | 925523    | AP2A2      | 2 | EGFR and pan-negative |
| cg03818682 | 11 | 1213459   | 0          | 2 | EGFR and pan-negative |
| cg03609102 | 11 | 1244533   | MUC5B      | 2 | EGFR and pan-negative |
| cg22424444 | 11 | 1331736   | TOLLIP-AS1 | 2 | EGFR and pan-negative |
| cg14021073 | 11 | 1410385   | BRISK2     | 2 | EGFR and pan-negative |
| cg01468621 | 11 | 1411609   | BRISK2     | 2 | EGFR and pan-negative |
| cg24331162 | 11 | 1855665   | SYT8       | 2 | EGFR and pan-negative |
| cg26473272 | 11 | 1856268   | SYT8       | 2 | EGFR and pan-negative |
| cg01909245 | 11 | 1873757   | LSP1       | 2 | EGFR and pan-negative |
| cg26158194 | 11 | 1874320   | LSP1       | 2 | EGFR and pan-negative |
| cg19642007 | 11 | 1944464   | TNNT3      | 2 | EGFR and pan-negative |
| cg22172494 | 11 | 2017362   | H19        | 2 | EGFR and pan-negative |
| cg17769238 | 11 | 2019568   | H19        | 2 | EGFR and pan-negative |
| cg22956483 | 11 | 2154432   | IGF2       | 2 | EGFR and pan-negative |
| cg02166532 | 11 | 2159853   | IGF2       | 2 | EGFR and pan-negative |
| cg20339650 | 11 | 2160882   | IGF2       | 2 | EGFR and pan-negative |
| cg13756879 | 11 | 2161473   | IGF2-AS    | 2 | EGFR and pan-negative |
| cg25163476 | 11 | 2161586   | IGF2-AS    | 2 | EGFR and pan-negative |
| cg17773950 | 11 | 2161598   | IGF2-AS    | 2 | EGFR and pan-negative |
| cg21237591 | 11 | 2162510   | IGF2       | 2 | EGFR and pan-negative |
| cg12322132 | 11 | 2165656   | IGF2-AS    | 2 | EGFR and pan-negative |
| cg13993218 | 11 | 2181866   | INS-IGF2   | 2 | EGFR and pan-negative |
| cg00613255 | 11 | 2182376   | INS        | 2 | EGFR and pan-negative |
| cg25336198 | 11 | 2182618   | INS-IGF2   | 2 | EGFR and pan-negative |
| cg03366382 | 11 | 2182644   | INS        | 2 | EGFR and pan-negative |
| cg00041575 | 11 | 2322741   | C11orf21   | 2 | EGFR and pan-negative |
| cg11474811 | 11 | 2443869   | TRPM5      | 2 | EGFR and pan-negative |
| cg07882535 | 11 | 2445392   | TRPM5      | 2 | EGFR and pan-negative |
| cg04719766 | 11 | 2542580   | KCNQ1      | 2 | EGFR and pan-negative |
| cg08007665 | 11 | 2593857   | KCNQ1      | 2 | EGFR and pan-negative |
| cg26750319 | 11 | 2593960   | KCNQ1      | 2 | EGFR and pan-negative |
| cg20751395 | 11 | 2594153   | KCNQ1      | 2 | EGFR and pan-negative |
| cg06233503 | 11 | 2812674   | KCNQ1      | 2 | EGFR and pan-negative |
| cg16778148 | 11 | 2817922   | KCNQ1      | 2 | EGFR and pan-negative |
| cg26879282 | 11 | 2817991   | KCNQ1      | 2 | EGFR and pan-negative |
| cg03143849 | 11 | 2904951   | CDKN1C     | 2 | EGFR and pan-negative |
| cg23146358 | 11 | 2905496   | CDKN1C     | 2 | EGFR and pan-negative |
| cg23548479 | 11 | 2906679   | CDKN1C     | 2 | EGFR and pan-negative |
| cg05559445 | 11 | 2907674   | CDKN1C     | 2 | EGFR and pan-negative |
| cg02719634 | 11 | 2924899   | SLC22A18AS | 2 | EGFR and pan-negative |
| cg08999895 | 11 | 2925869   | SLC22A18AS | 2 | EGFR and pan-negative |
| cg23698969 | 11 | 2931165   | SLC22A18   | 2 | EGFR and pan-negative |
| cg19240938 | 11 | 2942036   | SLC22A18   | 2 | EGFR and pan-negative |
| cg01263716 | 11 | 2951590   | PHLDA2     | 2 | EGFR and pan-negative |
| cg11961618 | 11 | 2951844   | PHLDA2     | 2 | EGFR and pan-negative |
| cg08508325 | 11 | 3079039   | CARS       | 2 | EGFR and pan-negative |
| cg11219178 | 11 | 3120949   | OSBPL5     | 2 | EGFR and pan-negative |
| cg25852715 | 11 | 3121024   | OSBPL5     | 2 | EGFR and pan-negative |
| cg12514506 | 11 | 3121286   | OSBPL5     | 2 | EGFR and pan-negative |
| cg23617121 | 11 | 3121460   | OSBPL5     | 2 | EGFR and pan-negative |
| cg12970008 | 11 | 3186095   | OSBPL5     | 2 | EGFR and pan-negative |
| cg25322008 | 11 | 4719138   | OR51E2     | 2 | EGFR and pan-negative |
| cg06233985 | 11 | 5249528   | HBB        | 2 | EGFR and pan-negative |
| cg20609368 | 11 | 5257253   | HBD        | 2 | EGFR and pan-negative |
| cg01598642 | 11 | 5272039   | HBG1       | 2 | EGFR and pan-negative |
| cg10920765 | 11 | 5276721   | HBG2       | 2 | EGFR and pan-negative |
| cg08970694 | 11 | 5290746   | HBE1       | 2 | EGFR and pan-negative |
| cg13346411 | 11 | 6280512   | CCKBR      | 2 | EGFR and pan-negative |
| cg11547724 | 11 | 6462452   | HPX        | 2 | EGFR and pan-negative |
| cg19219366 | 11 | 6495536   | TRIM3      | 2 | EGFR and pan-negative |
| cg25368651 | 11 | 6518287   | DNHD1      | 2 | EGFR and pan-negative |
| cg01086895 | 11 | 6676515   | DCHS1      | 2 | EGFR and pan-negative |
| cg03780486 | 11 | 6817280   | OR6A2      | 2 | EGFR and pan-negative |
| cg05393484 | 11 | 6818466   | OR6A2      | 2 | EGFR and pan-negative |
| cg22951794 | 11 | 6867280   | OR10A5     | 2 | EGFR and pan-negative |
| cg03898365 | 11 | 6897491   | OR10A4     | 2 | EGFR and pan-negative |
| cg02416716 | 11 | 6948024   | ZNF215     | 2 | EGFR and pan-negative |
| cg02347487 | 11 | 7059103   | NLRP14     | 2 | EGFR and pan-negative |
| cg25203856 | 11 | 7059980   | NLRP14     | 2 | EGFR and pan-negative |
| cg22062068 | 11 | 7110074   | RBMXL2     | 2 | EGFR and pan-negative |
| cg08185661 | 11 | 7273498   | SYT9       | 2 | EGFR and pan-negative |
| cg06714705 | 11 | 7506940   | OLFML1     | 2 | EGFR and pan-negative |
| cg00859655 | 11 | 7694524   | CYB5R2     | 2 | EGFR and pan-negative |

|            |    |          |           |   |                       |
|------------|----|----------|-----------|---|-----------------------|
| cg03826976 | 11 | 7695433  | CYB5R2    | 2 | EGFR and pan-negative |
| cg13410437 | 11 | 7818165  | OR5P2     | 2 | EGFR and pan-negative |
| cg01469547 | 11 | 7847155  | OR5P3     | 2 | EGFR and pan-negative |
| cg18484189 | 11 | 7984973  | NLRP10    | 2 | EGFR and pan-negative |
| cg20311730 | 11 | 7985183  | NLRP10    | 2 | EGFR and pan-negative |
| cg05492113 | 11 | 8060332  | TUB       | 2 | EGFR and pan-negative |
| cg08383315 | 11 | 8190565  | RIC3      | 2 | EGFR and pan-negative |
| cg00186954 | 11 | 8933980  | AKIP1     | 2 | EGFR and pan-negative |
| cg09674867 | 11 | 8954206  | C11orf16  | 2 | EGFR and pan-negative |
| cg01643624 | 11 | 8954893  | C11orf16  | 2 | EGFR and pan-negative |
| cg24921089 | 11 | 10472840 | AMPD3     | 2 | EGFR and pan-negative |
| cg03908676 | 11 | 10590282 | LYVE1     | 2 | EGFR and pan-negative |
| cg24541550 | 11 | 10715360 | MRVI1     | 2 | EGFR and pan-negative |
| cg24365867 | 11 | 10715595 | MRVI1     | 2 | EGFR and pan-negative |
| cg05181279 | 11 | 11982794 | 0         | 2 | EGFR and pan-negative |
| cg13216057 | 11 | 12030643 | DDK3      | 2 | EGFR and pan-negative |
| cg01781266 | 11 | 12398966 | PARVA     | 2 | EGFR and pan-negative |
| cg26320696 | 11 | 12399109 | PARVA     | 2 | EGFR and pan-negative |
| cg06499652 | 11 | 13299410 | ARNTL     | 2 | EGFR and pan-negative |
| cg24816298 | 11 | 13519025 | PTH       | 2 | EGFR and pan-negative |
| cg09191626 | 11 | 13983986 | SPON1     | 2 | EGFR and pan-negative |
| cg03439703 | 11 | 14664991 | PSMA1     | 2 | EGFR and pan-negative |
| cg05532892 | 11 | 14666436 | PDE3B     | 2 | EGFR and pan-negative |
| cg09188980 | 11 | 14993378 | CALCA     | 2 | EGFR and pan-negative |
| cg14348532 | 11 | 14993562 | CALCA     | 2 | EGFR and pan-negative |
| cg06295856 | 11 | 14993642 | CALCA     | 2 | EGFR and pan-negative |
| cg09068492 | 11 | 14993658 | CALCA     | 2 | EGFR and pan-negative |
| cg22183706 | 11 | 14993818 | CALCA     | 2 | EGFR and pan-negative |
| cg01971122 | 11 | 14993929 | CALCA     | 2 | EGFR and pan-negative |
| cg26833169 | 11 | 14994045 | CALCA     | 2 | EGFR and pan-negative |
| cg10467022 | 11 | 14994983 | CALCA     | 2 | EGFR and pan-negative |
| cg06938878 | 11 | 15094364 | CALCB     | 2 | EGFR and pan-negative |
| cg08896945 | 11 | 15095068 | CALCB     | 2 | EGFR and pan-negative |
| cg11981631 | 11 | 17497967 | ABCC8     | 2 | EGFR and pan-negative |
| cg21289015 | 11 | 17566048 | USH1C     | 2 | EGFR and pan-negative |
| cg24322623 | 11 | 17740430 | MYOD1     | 2 | EGFR and pan-negative |
| cg16519321 | 11 | 17741243 | MYOD1     | 2 | EGFR and pan-negative |
| cg16446783 | 11 | 18193360 | MRGPRX4   | 2 | EGFR and pan-negative |
| cg09691574 | 11 | 18193674 | MRGPRX4   | 2 | EGFR and pan-negative |
| cg14813083 | 11 | 18477280 | LDHAL6A   | 2 | EGFR and pan-negative |
| cg07915343 | 11 | 18477680 | LDHAL6A   | 2 | EGFR and pan-negative |
| cg17233601 | 11 | 18814418 | PTPN5     | 2 | EGFR and pan-negative |
| cg23001457 | 11 | 18956283 | MRGPRX1   | 2 | EGFR and pan-negative |
| cg24252809 | 11 | 18957451 | MRGPRX1   | 2 | EGFR and pan-negative |
| cg18788940 | 11 | 20385085 | HTATIP2   | 2 | EGFR and pan-negative |
| cg11784785 | 11 | 20620089 | SLC6A5    | 2 | EGFR and pan-negative |
| cg20632573 | 11 | 20621341 | SLC6A5    | 2 | EGFR and pan-negative |
| cg17371081 | 11 | 20690957 | NELL1     | 2 | EGFR and pan-negative |
| cg20113732 | 11 | 20691180 | NELL1     | 2 | EGFR and pan-negative |
| cg04270835 | 11 | 22359188 | SLC17A6   | 2 | EGFR and pan-negative |
| cg03794550 | 11 | 22646597 | FANCF     | 2 | EGFR and pan-negative |
| cg03087937 | 11 | 26593556 | MUC15     | 2 | EGFR and pan-negative |
| cg16215361 | 11 | 26594620 | MUC15     | 2 | EGFR and pan-negative |
| cg20910746 | 11 | 27062416 | BBOX1     | 2 | EGFR and pan-negative |
| cg27351358 | 11 | 27743258 | BDNF      | 2 | EGFR and pan-negative |
| cg16257091 | 11 | 27743580 | BDNF      | 2 | EGFR and pan-negative |
| cg18740800 | 11 | 27914934 | 0         | 2 | EGFR and pan-negative |
| cg15183083 | 11 | 30038310 | KCNA4     | 2 | EGFR and pan-negative |
| cg27420123 | 11 | 30251473 | FSHB      | 2 | EGFR and pan-negative |
| cg06790862 | 11 | 30601783 | MPPED2    | 2 | EGFR and pan-negative |
| cg23577242 | 11 | 30603015 | MPPED2    | 2 | EGFR and pan-negative |
| cg25242557 | 11 | 31833264 | PAX6      | 2 | EGFR and pan-negative |
| cg12311132 | 11 | 32112154 | RCN1      | 2 | EGFR and pan-negative |
| cg13301003 | 11 | 32449254 | WT1       | 2 | EGFR and pan-negative |
| cg04096767 | 11 | 32449450 | WT1       | 2 | EGFR and pan-negative |
| cg16501028 | 11 | 32450000 | WT1       | 2 | EGFR and pan-negative |
| cg06516124 | 11 | 32450591 | WT1       | 2 | EGFR and pan-negative |
| cg12781568 | 11 | 32452038 | WT1       | 2 | EGFR and pan-negative |
| cg01693350 | 11 | 32452187 | WT1       | 2 | EGFR and pan-negative |
| cg22533573 | 11 | 32452771 | WT1       | 2 | EGFR and pan-negative |
| cg22975913 | 11 | 32457727 | WT1-AS    | 2 | EGFR and pan-negative |
| cg19718882 | 11 | 32458714 | WT1-AS    | 2 | EGFR and pan-negative |
| cg25577842 | 11 | 32459760 | WT1-AS    | 2 | EGFR and pan-negative |
| cg25505610 | 11 | 32605184 | EIF3M     | 2 | EGFR and pan-negative |
| cg19005368 | 11 | 32851950 | PRRG4     | 2 | EGFR and pan-negative |
| cg07599644 | 11 | 33693866 | KIAA1549L | 2 | EGFR and pan-negative |
| cg06601473 | 11 | 33694151 | KIAA1549L | 2 | EGFR and pan-negative |
| cg24453664 | 11 | 33758413 | CD59      | 2 | EGFR and pan-negative |
| cg13084525 | 11 | 34642463 | EHF       | 2 | EGFR and pan-negative |
| cg18414381 | 11 | 34642885 | EHF       | 2 | EGFR and pan-negative |
| cg07253191 | 11 | 34936862 | PDHX      | 2 | EGFR and pan-negative |
| cg14642338 | 11 | 35547903 | PAMR1     | 2 | EGFR and pan-negative |
| cg11494699 | 11 | 36588217 | RAG1      | 2 | EGFR and pan-negative |
| cg10399228 | 11 | 36590244 | RAG1      | 2 | EGFR and pan-negative |
| cg10364182 | 11 | 36615998 | C11orf74  | 2 | EGFR and pan-negative |
| cg20731798 | 11 | 36616365 | C11orf74  | 2 | EGFR and pan-negative |
| cg23324787 | 11 | 36619694 | RAG2      | 2 | EGFR and pan-negative |
| cg23058901 | 11 | 44324759 | ALX4      | 2 | EGFR and pan-negative |
| cg14753432 | 11 | 44324833 | ALX4      | 2 | EGFR and pan-negative |
| cg15522957 | 11 | 44324925 | ALX4      | 2 | EGFR and pan-negative |
| cg00061629 | 11 | 44325258 | ALX4      | 2 | EGFR and pan-negative |
| cg19358442 | 11 | 44325687 | ALX4      | 2 | EGFR and pan-negative |
| cg07696033 | 11 | 44326410 | ALX4      | 2 | EGFR and pan-negative |
| cg04970352 | 11 | 44327399 | ALX4      | 2 | EGFR and pan-negative |
| cg16977035 | 11 | 44330474 | ALX4      | 2 | EGFR and pan-negative |

|            |    |          |            |   |                       |
|------------|----|----------|------------|---|-----------------------|
| cg11797994 | 11 | 44330731 | ALX4       | 2 | EGFR and pan-negative |
| cg15817236 | 11 | 44331362 | ALX4       | 2 | EGFR and pan-negative |
| cg04988423 | 11 | 44331577 | ALX4       | 2 | EGFR and pan-negative |
| cg27318318 | 11 | 44332849 | ALX4       | 2 | EGFR and pan-negative |
| cg22854223 | 11 | 44586505 | CD82       | 2 | EGFR and pan-negative |
| cg10313633 | 11 | 44972890 | TP53I11    | 2 | EGFR and pan-negative |
| cg09699159 | 11 | 45115528 | PRDM11     | 2 | EGFR and pan-negative |
| cg15461516 | 11 | 45686369 | CHST1      | 2 | EGFR and pan-negative |
| cg03491478 | 11 | 45906914 | MAPK8IP1   | 2 | EGFR and pan-negative |
| cg03568064 | 11 | 45907500 | MAPK8IP1   | 2 | EGFR and pan-negative |
| cg01991150 | 11 | 46407677 | CHRM4      | 2 | EGFR and pan-negative |
| cg00195561 | 11 | 46408584 | CHRM4      | 2 | EGFR and pan-negative |
| cg26198807 | 11 | 46957758 | C11orf49   | 2 | EGFR and pan-negative |
| cg09163021 | 11 | 47470768 | RAPSN      | 2 | EGFR and pan-negative |
| cg05585544 | 11 | 47624801 | 0          | 2 | EGFR and pan-negative |
| cg04962134 | 11 | 55653310 | TRIM51     | 2 | EGFR and pan-negative |
| cg25890048 | 11 | 55703443 | OR5I1      | 2 | EGFR and pan-negative |
| cg24459209 | 11 | 57148215 | PRG3       | 2 | EGFR and pan-negative |
| cg09061733 | 11 | 57364841 | SERPING1   | 2 | EGFR and pan-negative |
| cg12783776 | 11 | 57365948 | SERPING1   | 2 | EGFR and pan-negative |
| cg13473383 | 11 | 57434378 | ZDHHC5     | 2 | EGFR and pan-negative |
| cg06200697 | 11 | 57528838 | CTNND1     | 2 | EGFR and pan-negative |
| cg15423764 | 11 | 58495533 | GLYAT      | 2 | EGFR and pan-negative |
| cg17173423 | 11 | 59823993 | MS4A3      | 2 | EGFR and pan-negative |
| cg25944100 | 11 | 59824260 | MS4A3      | 2 | EGFR and pan-negative |
| cg22197708 | 11 | 59855616 | MS4A2      | 2 | EGFR and pan-negative |
| cg10414946 | 11 | 59856358 | MS4A2      | 2 | EGFR and pan-negative |
| cg03055440 | 11 | 59950405 | MS4A6A     | 2 | EGFR and pan-negative |
| cg08935003 | 11 | 60101561 | MS4A6E     | 2 | EGFR and pan-negative |
| cg05040360 | 11 | 60102449 | MS4A6E     | 2 | EGFR and pan-negative |
| cg13765961 | 11 | 60223238 | MS4A1      | 2 | EGFR and pan-negative |
| cg06806711 | 11 | 60223291 | MS4A1      | 2 | EGFR and pan-negative |
| cg23307338 | 11 | 60260467 | MS4A12     | 2 | EGFR and pan-negative |
| cg19105504 | 11 | 60524472 | MS4A15     | 2 | EGFR and pan-negative |
| cg23904249 | 11 | 60608951 | CCDC86     | 2 | EGFR and pan-negative |
| cg26980692 | 11 | 60719947 | SLC15A3    | 2 | EGFR and pan-negative |
| cg09750183 | 11 | 61008109 | PGA5       | 2 | EGFR and pan-negative |
| cg03160637 | 11 | 61101089 | DDB1       | 2 | EGFR and pan-negative |
| cg25406518 | 11 | 61102165 | DDB1       | 2 | EGFR and pan-negative |
| cg18595258 | 11 | 61128572 | TMEM138    | 2 | EGFR and pan-negative |
| cg06781209 | 11 | 61594997 | FADS2      | 2 | EGFR and pan-negative |
| cg07005513 | 11 | 61595956 | FADS2      | 2 | EGFR and pan-negative |
| cg01772980 | 11 | 61957695 | SCGB1D1    | 2 | EGFR and pan-negative |
| cg08459368 | 11 | 61974948 | SCGB2A1    | 2 | EGFR and pan-negative |
| cg16986846 | 11 | 61976174 | SCGB2A1    | 2 | EGFR and pan-negative |
| cg26041297 | 11 | 62009811 | SCGB1D2    | 2 | EGFR and pan-negative |
| cg14741922 | 11 | 62036934 | SCGB2A2    | 2 | EGFR and pan-negative |
| cg22862656 | 11 | 62037659 | SCGB2A2    | 2 | EGFR and pan-negative |
| cg12640109 | 11 | 62104720 | ASRGL1     | 2 | EGFR and pan-negative |
| cg11504739 | 11 | 62186060 | SCGB1A1    | 2 | EGFR and pan-negative |
| cg09494188 | 11 | 62186529 | SCGB1A1    | 2 | EGFR and pan-negative |
| cg19764555 | 11 | 62315119 | AHNAK      | 2 | EGFR and pan-negative |
| cg25620220 | 11 | 62457325 | LRRN4CL    | 2 | EGFR and pan-negative |
| cg13530039 | 11 | 62689557 | CHRM1      | 2 | EGFR and pan-negative |
| cg12439773 | 11 | 62752119 | SLC22A6    | 2 | EGFR and pan-negative |
| cg06917325 | 11 | 62783123 | SLC22A8    | 2 | EGFR and pan-negative |
| cg21062347 | 11 | 62783543 | SLC22A8    | 2 | EGFR and pan-negative |
| cg11484576 | 11 | 63272554 | LGALS12    | 2 | EGFR and pan-negative |
| cg05016508 | 11 | 63871570 | FLRT1      | 2 | EGFR and pan-negative |
| cg05492845 | 11 | 64002298 | VEGFB      | 2 | EGFR and pan-negative |
| cg16977872 | 11 | 64008132 | FKBP2      | 2 | EGFR and pan-negative |
| cg25400358 | 11 | 64054159 | GPR137     | 2 | EGFR and pan-negative |
| cg13412615 | 11 | 64057807 | KCNK4      | 2 | EGFR and pan-negative |
| cg00022866 | 11 | 64108440 | CCDC88B    | 2 | EGFR and pan-negative |
| cg14170423 | 11 | 64513809 | RASGRP2    | 2 | EGFR and pan-negative |
| cg10821722 | 11 | 64571899 | MAP4K2     | 2 | EGFR and pan-negative |
| cg20585500 | 11 | 64703192 | GPHA2      | 2 | EGFR and pan-negative |
| cg17321617 | 11 | 64764490 | BATF2      | 2 | EGFR and pan-negative |
| cg13853761 | 11 | 64863232 | VPS51      | 2 | EGFR and pan-negative |
| cg13179915 | 11 | 65362949 | KCNK7      | 2 | EGFR and pan-negative |
| cg17918700 | 11 | 65363503 | KCNK7      | 2 | EGFR and pan-negative |
| cg18746357 | 11 | 65429465 | RELA       | 2 | EGFR and pan-negative |
| cg19018097 | 11 | 65601328 | SNX32      | 2 | EGFR and pan-negative |
| cg03887787 | 11 | 65647532 | CTSW       | 2 | EGFR and pan-negative |
| cg13547237 | 11 | 65687877 | DRAP1      | 2 | EGFR and pan-negative |
| cg10467098 | 11 | 65687892 | DRAP1      | 2 | EGFR and pan-negative |
| cg21415080 | 11 | 65768416 | BANF1      | 2 | EGFR and pan-negative |
| cg14894216 | 11 | 65794352 | CATSPER1   | 2 | EGFR and pan-negative |
| cg21238818 | 11 | 65816642 | GAL3ST3    | 2 | EGFR and pan-negative |
| cg00350296 | 11 | 66084841 | CD248      | 2 | EGFR and pan-negative |
| cg05998426 | 11 | 66103925 | RIN1       | 2 | EGFR and pan-negative |
| cg10839997 | 11 | 66115647 | B3GNT1     | 2 | EGFR and pan-negative |
| cg02055483 | 11 | 66188019 | NPAS4      | 2 | EGFR and pan-negative |
| cg06817264 | 11 | 66335649 | CTSF       | 2 | EGFR and pan-negative |
| cg20158826 | 11 | 66359489 | CCDC87     | 2 | EGFR and pan-negative |
| cg13074965 | 11 | 66395305 | RBM14-RBM4 | 2 | EGFR and pan-negative |
| cg18962105 | 11 | 66444806 | RBM4B      | 2 | EGFR and pan-negative |
| cg19192120 | 11 | 67070517 | SSH3       | 2 | EGFR and pan-negative |
| cg22285621 | 11 | 67071322 | SSH3       | 2 | EGFR and pan-negative |
| cg01432087 | 11 | 67242162 | 0          | 2 | EGFR and pan-negative |
| cg25025243 | 11 | 67350234 | GSTP1      | 2 | EGFR and pan-negative |
| cg11566244 | 11 | 67351786 | GSTP1      | 2 | EGFR and pan-negative |
| cg22224704 | 11 | 67352041 | GSTP1      | 2 | EGFR and pan-negative |
| cg06235429 | 11 | 67373114 | NDUFV1     | 2 | EGFR and pan-negative |
| cg11096993 | 11 | 67417958 | ACY3       | 2 | EGFR and pan-negative |

|            |    |           |                |   |                       |
|------------|----|-----------|----------------|---|-----------------------|
| cg06148175 | 11 | 67418148  | ACY3           | 2 | EGFR and pan-negative |
| cg21631409 | 11 | 67449882  | ALDH3B2        | 2 | EGFR and pan-negative |
| cg08785534 | 11 | 68451827  | GAL            | 2 | EGFR and pan-negative |
| cg04438497 | 11 | 68519252  | MTL5           | 2 | EGFR and pan-negative |
| cg19596755 | 11 | 68609747  | CPT1A          | 2 | EGFR and pan-negative |
| cg24776407 | 11 | 69061634  | MYEOV          | 2 | EGFR and pan-negative |
| cg04717045 | 11 | 69468789  | CCND1          | 2 | EGFR and pan-negative |
| cg00953256 | 11 | 69468875  | CCND1          | 2 | EGFR and pan-negative |
| cg02723533 | 11 | 69468991  | CCND1          | 2 | EGFR and pan-negative |
| cg11802013 | 11 | 69469175  | CCND1          | 2 | EGFR and pan-negative |
| cg07426960 | 11 | 69469290  | 0              | 2 | EGFR and pan-negative |
| cg15774153 | 11 | 69518773  | FGF19          | 2 | EGFR and pan-negative |
| cg26096837 | 11 | 69519974  | FGF19          | 2 | EGFR and pan-negative |
| cg17277529 | 11 | 69633959  | FGF3           | 2 | EGFR and pan-negative |
| cg15337897 | 11 | 69634400  | FGF3           | 2 | EGFR and pan-negative |
| cg17913068 | 11 | 70116114  | PPFIA1         | 2 | EGFR and pan-negative |
| cg10362475 | 11 | 70507825  | SHANK2         | 2 | EGFR and pan-negative |
| cg10889792 | 11 | 71258917  | KRTAP5-9       | 2 | EGFR and pan-negative |
| cg26832211 | 11 | 71259251  | KRTAP5-9       | 2 | EGFR and pan-negative |
| cg18627308 | 11 | 71497489  | FAM86C1        | 2 | EGFR and pan-negative |
| cg16749930 | 11 | 71709978  | IL18BP         | 2 | EGFR and pan-negative |
| cg08440425 | 11 | 71790735  | LRTOMT         | 2 | EGFR and pan-negative |
| cg08097973 | 11 | 71793051  | NUMA1          | 2 | EGFR and pan-negative |
| cg07676849 | 11 | 71845665  | FOLR3          | 2 | EGFR and pan-negative |
| cg22635155 | 11 | 72385075  | PDE2A          | 2 | EGFR and pan-negative |
| cg10287137 | 11 | 72929054  | P2RY2          | 2 | EGFR and pan-negative |
| cg25288155 | 11 | 73357396  | PLEKHB1        | 2 | EGFR and pan-negative |
| cg22108265 | 11 | 73471972  | RAB6A          | 2 | EGFR and pan-negative |
| cg25124030 | 11 | 73498278  | MRPL48         | 2 | EGFR and pan-negative |
| cg07196761 | 11 | 73586776  | PAAF1          | 2 | EGFR and pan-negative |
| cg19692710 | 11 | 73661920  | DNAJB13        | 2 | EGFR and pan-negative |
| cg26119740 | 11 | 73881915  | C2CD3          | 2 | EGFR and pan-negative |
| cg25599211 | 11 | 74023050  | P4HA3          | 2 | EGFR and pan-negative |
| cg23189044 | 11 | 74178114  | KCNE3          | 2 | EGFR and pan-negative |
| cg02595219 | 11 | 74178761  | KCNE3          | 2 | EGFR and pan-negative |
| cg08952029 | 11 | 74442900  | CHRD12         | 2 | EGFR and pan-negative |
| cg18589858 | 11 | 74860985  | SLCO2B1        | 2 | EGFR and pan-negative |
| cg16547529 | 11 | 75140681  | KLHL35         | 2 | EGFR and pan-negative |
| cg12531542 | 11 | 75429059  | MOGAT2         | 2 | EGFR and pan-negative |
| cg21238457 | 11 | 75917353  | WNT11          | 2 | EGFR and pan-negative |
| cg20899321 | 11 | 76380605  | LRRC32         | 2 | EGFR and pan-negative |
| cg26952188 | 11 | 76840241  | MYO7A          | 2 | EGFR and pan-negative |
| cg13002506 | 11 | 76998821  | GDPD4          | 2 | EGFR and pan-negative |
| cg14521746 | 11 | 77185492  | PAK1           | 2 | EGFR and pan-negative |
| cg17260124 | 11 | 77734744  | KCTD14         | 2 | EGFR and pan-negative |
| cg00846036 | 11 | 84634126  | DLG2           | 2 | EGFR and pan-negative |
| cg14137939 | 11 | 85397109  | CCDC89         | 2 | EGFR and pan-negative |
| cg24939733 | 11 | 85397684  | CCDC89         | 2 | EGFR and pan-negative |
| cg16404106 | 11 | 86085623  | CCDC81         | 2 | EGFR and pan-negative |
| cg25500444 | 11 | 86086101  | CCDC81         | 2 | EGFR and pan-negative |
| cg07560096 | 11 | 86383182  | ME3            | 2 | EGFR and pan-negative |
| cg23214764 | 11 | 86511210  | PRSS23         | 2 | EGFR and pan-negative |
| cg17541922 | 11 | 86511813  | PRSS23         | 2 | EGFR and pan-negative |
| cg18411891 | 11 | 86666000  | FZD4           | 2 | EGFR and pan-negative |
| cg17173856 | 11 | 88782137  | GRM5           | 2 | EGFR and pan-negative |
| cg02915544 | 11 | 89392829  | FOLH1B         | 2 | EGFR and pan-negative |
| cg02284188 | 11 | 89541672  | TRIM49         | 2 | EGFR and pan-negative |
| cg22767466 | 11 | 89541866  | TRIM49         | 2 | EGFR and pan-negative |
| cg05500015 | 11 | 89867819  | NAALAD2        | 2 | EGFR and pan-negative |
| cg21500966 | 11 | 89867976  | NAALAD2        | 2 | EGFR and pan-negative |
| cg22325703 | 11 | 94134235  | GPR83          | 2 | EGFR and pan-negative |
| cg27634151 | 11 | 94134646  | GPR83          | 2 | EGFR and pan-negative |
| cg00796728 | 11 | 94276898  | FUT4           | 2 | EGFR and pan-negative |
| cg13037275 | 11 | 94965364  | SESN3          | 2 | EGFR and pan-negative |
| cg23641145 | 11 | 101000566 | PGR            | 2 | EGFR and pan-negative |
| cg11016563 | 11 | 101454626 | TRPC6          | 2 | EGFR and pan-negative |
| cg07013734 | 11 | 101454683 | TRPC6          | 2 | EGFR and pan-negative |
| cg26369667 | 11 | 101981789 | YAP1           | 2 | EGFR and pan-negative |
| cg16575408 | 11 | 102669291 | MMP1           | 2 | EGFR and pan-negative |
| cg02212280 | 11 | 102670192 | MMP1           | 2 | EGFR and pan-negative |
| cg18113270 | 11 | 102713490 | MMP3           | 2 | EGFR and pan-negative |
| cg16466334 | 11 | 102714358 | MMP3           | 2 | EGFR and pan-negative |
| cg09980522 | 11 | 105481802 | GRIA4          | 2 | EGFR and pan-negative |
| cg23984434 | 11 | 106888656 | GUCY1A2        | 2 | EGFR and pan-negative |
| cg21958798 | 11 | 106890084 | GUCY1A2        | 2 | EGFR and pan-negative |
| cg12237269 | 11 | 107582734 | SLN            | 2 | EGFR and pan-negative |
| cg17971003 | 11 | 107582804 | SLN            | 2 | EGFR and pan-negative |
| cg24027342 | 11 | 108131609 | ATM            | 2 | EGFR and pan-negative |
| cg22879515 | 11 | 111383515 | MIR34B         | 2 | EGFR and pan-negative |
| cg23211240 | 11 | 111383624 | MIR34B         | 2 | EGFR and pan-negative |
| cg13084335 | 11 | 111782670 | CRYAB          | 2 | EGFR and pan-negative |
| cg12598198 | 11 | 111784386 | HSPB2-C11orf52 | 2 | EGFR and pan-negative |
| cg11304234 | 11 | 112034801 | IL18           | 2 | EGFR and pan-negative |
| cg20268522 | 11 | 112832152 | NCAM1          | 2 | EGFR and pan-negative |
| cg13692433 | 11 | 112832159 | NCAM1          | 2 | EGFR and pan-negative |
| cg21330703 | 11 | 113346388 | DRD2           | 2 | EGFR and pan-negative |
| cg25101936 | 11 | 113929164 | ZBTB16         | 2 | EGFR and pan-negative |
| cg09632136 | 11 | 114165661 | NNMT           | 2 | EGFR and pan-negative |
| cg02788102 | 11 | 115374969 | CADM1          | 2 | EGFR and pan-negative |
| cg10193817 | 11 | 115375226 | CADM1          | 2 | EGFR and pan-negative |
| cg02157083 | 11 | 116662800 | APOA5          | 2 | EGFR and pan-negative |
| cg15727249 | 11 | 116693415 | APOA4          | 2 | EGFR and pan-negative |
| cg05921324 | 11 | 116694114 | APOA4          | 2 | EGFR and pan-negative |
| cg04048249 | 11 | 116700556 | APOC3          | 2 | EGFR and pan-negative |
| cg20691580 | 11 | 116701044 | APOC3          | 2 | EGFR and pan-negative |

|            |    |           |             |   |                       |
|------------|----|-----------|-------------|---|-----------------------|
| cg03856801 | 11 | 116709138 | APOA1       | 2 | EGFR and pan-negative |
| cg15427448 | 11 | 117186896 | BACE1       | 2 | EGFR and pan-negative |
| cg19703610 | 11 | 117667737 | DSCAML1     | 2 | EGFR and pan-negative |
| cg13565215 | 11 | 117668336 | DSCAML1     | 2 | EGFR and pan-negative |
| cg10997248 | 11 | 117699019 | FXVD2       | 2 | EGFR and pan-negative |
| cg13828839 | 11 | 117747166 | FXVD6       | 2 | EGFR and pan-negative |
| cg22476084 | 11 | 117747874 | FXVD6-FXVD2 | 2 | EGFR and pan-negative |
| cg17186803 | 11 | 118023038 | SCN4B       | 2 | EGFR and pan-negative |
| cg27560864 | 11 | 118024339 | SCN4B       | 2 | EGFR and pan-negative |
| cg07728874 | 11 | 118213272 | CD3D        | 2 | EGFR and pan-negative |
| cg07545925 | 11 | 118214927 | CD3G        | 2 | EGFR and pan-negative |
| cg09096950 | 11 | 118230095 | UBE4A       | 2 | EGFR and pan-negative |
| cg11286122 | 11 | 118477406 | PHLDB1      | 2 | EGFR and pan-negative |
| cg11507178 | 11 | 118781515 | BCL9L       | 2 | EGFR and pan-negative |
| cg17791936 | 11 | 118902213 | SLC37A4     | 2 | EGFR and pan-negative |
| cg21096399 | 11 | 119188145 | MCAM        | 2 | EGFR and pan-negative |
| cg26090652 | 11 | 119211440 | C1QTNF5     | 2 | EGFR and pan-negative |
| cg20483374 | 11 | 119211646 | C1QTNF5     | 2 | EGFR and pan-negative |
| cg15075718 | 11 | 119217176 | C1QTNF5     | 2 | EGFR and pan-negative |
| cg19560971 | 11 | 119218238 | MFRP        | 2 | EGFR and pan-negative |
| cg27234090 | 11 | 119251854 | USP2        | 2 | EGFR and pan-negative |
| cg21633698 | 11 | 119294534 | THY1        | 2 | EGFR and pan-negative |
| cg11466837 | 11 | 120009682 | TRIM29      | 2 | EGFR and pan-negative |
| cg26145103 | 11 | 120196505 | TMEM136     | 2 | EGFR and pan-negative |
| cg14252059 | 11 | 120973274 | TECTA       | 2 | EGFR and pan-negative |
| cg16026550 | 11 | 121323544 | SORL1       | 2 | EGFR and pan-negative |
| cg10977115 | 11 | 122709471 | CRTAM       | 2 | EGFR and pan-negative |
| cg22843446 | 11 | 123066252 | CLMP        | 2 | EGFR and pan-negative |
| cg13765785 | 11 | 123524938 | SCN3B       | 2 | EGFR and pan-negative |
| cg15457899 | 11 | 123525665 | SCN3B       | 2 | EGFR and pan-negative |
| cg14620221 | 11 | 124310939 | OR8B8       | 2 | EGFR and pan-negative |
| cg16612699 | 11 | 124311218 | OR8B8       | 2 | EGFR and pan-negative |
| cg03885639 | 11 | 124481310 | PANX3       | 2 | EGFR and pan-negative |
| cg08191915 | 11 | 124481614 | PANX3       | 2 | EGFR and pan-negative |
| cg10148841 | 11 | 124767455 | ROBO4       | 2 | EGFR and pan-negative |
| cg06142324 | 11 | 124805538 | HEPACAM     | 2 | EGFR and pan-negative |
| cg13018903 | 11 | 124806901 | HEPACAM     | 2 | EGFR and pan-negative |
| cg19286604 | 11 | 125365138 | FEZ1        | 2 | EGFR and pan-negative |
| cg08221207 | 11 | 125366421 | FEZ1        | 2 | EGFR and pan-negative |
| cg19433435 | 11 | 125366590 | FEZ1        | 2 | EGFR and pan-negative |
| cg07153965 | 11 | 125552087 | ACRV1       | 2 | EGFR and pan-negative |
| cg10377274 | 11 | 125616888 | PATE1       | 2 | EGFR and pan-negative |
| cg23743472 | 11 | 125649234 | PATE2       | 2 | EGFR and pan-negative |
| cg07747336 | 11 | 125649398 | PATE2       | 2 | EGFR and pan-negative |
| cg13755070 | 11 | 128563714 | FLI1        | 2 | EGFR and pan-negative |
| cg17872757 | 11 | 128564180 | FLI1        | 2 | EGFR and pan-negative |
| cg05193832 | 11 | 128736844 | KCNJ1       | 2 | EGFR and pan-negative |
| cg14481339 | 11 | 128737319 | KCNJ1       | 2 | EGFR and pan-negative |
| cg26624134 | 11 | 128761419 | KCNJ5       | 2 | EGFR and pan-negative |
| cg25022327 | 11 | 128812462 | TP53AIP1    | 2 | EGFR and pan-negative |
| cg20892287 | 11 | 128893851 | ARHGAP32    | 2 | EGFR and pan-negative |
| cg18913951 | 11 | 129685362 | TMEM45B     | 2 | EGFR and pan-negative |
| cg05067286 | 11 | 129686365 | TMEM45B     | 2 | EGFR and pan-negative |
| cg01033938 | 11 | 130298880 | ADAMTS8     | 2 | EGFR and pan-negative |
| cg01260219 | 11 | 130299333 | ADAMTS8     | 2 | EGFR and pan-negative |
| cg02564733 | 11 | 130319074 | ADAMTS15    | 2 | EGFR and pan-negative |
| cg16270990 | 11 | 130542897 | C11orf44    | 2 | EGFR and pan-negative |
| cg02477931 | 11 | 131532721 | NTM         | 2 | EGFR and pan-negative |
| cg20881910 | 11 | 131780332 | NTM         | 2 | EGFR and pan-negative |
| cg03923934 | 11 | 133402230 | OPCML       | 2 | EGFR and pan-negative |
| cg18457737 | 11 | 133715076 | SPATA19     | 2 | EGFR and pan-negative |
| cg26723847 | 11 | 134095652 | VPS26B      | 2 | EGFR and pan-negative |
| cg19674669 | 11 | 134146910 | GLB1L3      | 2 | EGFR and pan-negative |
| cg11012046 | 11 | 134202336 | GLB1L2      | 2 | EGFR and pan-negative |
| cg11038843 | 11 | 134281391 | B3GAT1      | 2 | EGFR and pan-negative |
| cg07845566 | 11 | 134282408 | B3GAT1      | 2 | EGFR and pan-negative |
| cg03139377 | 12 | 323242    | SLC6A12     | 2 | EGFR and pan-negative |
| cg20781967 | 12 | 772688    | NINJ2       | 2 | EGFR and pan-negative |
| cg00237010 | 12 | 772861    | NINJ2       | 2 | EGFR and pan-negative |
| cg24854010 | 12 | 1726033   | WNT5B       | 2 | EGFR and pan-negative |
| cg24505122 | 12 | 1726292   | WNT5B       | 2 | EGFR and pan-negative |
| cg16245844 | 12 | 1800488   | ADIPOR2     | 2 | EGFR and pan-negative |
| cg20033731 | 12 | 2161371   | CACNA1C     | 2 | EGFR and pan-negative |
| cg25519930 | 12 | 2161640   | CACNA1C     | 2 | EGFR and pan-negative |
| cg00830029 | 12 | 2943902   | NRIP2       | 2 | EGFR and pan-negative |
| cg05194726 | 12 | 2944480   | NRIP2       | 2 | EGFR and pan-negative |
| cg21637033 | 12 | 3068077   | TEAD4       | 2 | EGFR and pan-negative |
| cg23739862 | 12 | 3600666   | PRMT8       | 2 | EGFR and pan-negative |
| cg13574590 | 12 | 4382141   | CCND2       | 2 | EGFR and pan-negative |
| cg17886028 | 12 | 4383507   | CCND2       | 2 | EGFR and pan-negative |
| cg12382902 | 12 | 4383699   | CCND2       | 2 | EGFR and pan-negative |
| cg16994506 | 12 | 4383724   | CCND2       | 2 | EGFR and pan-negative |
| cg23219570 | 12 | 4488893   | FGF23       | 2 | EGFR and pan-negative |
| cg01731341 | 12 | 4554295   | FGF6        | 2 | EGFR and pan-negative |
| cg16512727 | 12 | 4649136   | RAD51AP1    | 2 | EGFR and pan-negative |
| cg09418321 | 12 | 4699618   | DYRK4       | 2 | EGFR and pan-negative |
| cg14920334 | 12 | 4829827   | GALNT8      | 2 | EGFR and pan-negative |
| cg03240509 | 12 | 4918169   | KCNA6       | 2 | EGFR and pan-negative |
| cg24605304 | 12 | 5152766   | KCNA5       | 2 | EGFR and pan-negative |
| cg04740359 | 12 | 5603542   | NTF3        | 2 | EGFR and pan-negative |
| cg11384427 | 12 | 6553585   | CD27        | 2 | EGFR and pan-negative |
| cg00363813 | 12 | 6664872   | IFFO1       | 2 | EGFR and pan-negative |
| cg01493517 | 12 | 6665447   | IFFO1       | 2 | EGFR and pan-negative |
| cg15464148 | 12 | 6745057   | LPAR5       | 2 | EGFR and pan-negative |
| cg20006825 | 12 | 6874964   | PTMS        | 2 | EGFR and pan-negative |

|            |    |          |                   |   |                       |
|------------|----|----------|-------------------|---|-----------------------|
| cg08146221 | 12 | 6875198  | <i>PTMS</i>       | 2 | EGFR and pan-negative |
| cg16470760 | 12 | 6898217  | <i>CD4</i>        | 2 | EGFR and pan-negative |
| cg22908581 | 12 | 6898975  | <i>CD4</i>        | 2 | EGFR and pan-negative |
| cg17805404 | 12 | 6930624  | <i>GPR162</i>     | 2 | EGFR and pan-negative |
| cg18881269 | 12 | 6936267  | <i>LEPREL2</i>    | 2 | EGFR and pan-negative |
| cg05484458 | 12 | 6949260  | <i>GNB3</i>       | 2 | EGFR and pan-negative |
| cg13334990 | 12 | 7023763  | <i>ENO2</i>       | 2 | EGFR and pan-negative |
| cg01437411 | 12 | 7033911  | <i>ATN1</i>       | 2 | EGFR and pan-negative |
| cg22335340 | 12 | 7055153  | <i>PTPN6</i>      | 2 | EGFR and pan-negative |
| cg13053396 | 12 | 7168545  | <i>C1S</i>        | 2 | EGFR and pan-negative |
| cg01726775 | 12 | 7261710  | <i>C1RL</i>       | 2 | EGFR and pan-negative |
| cg12207371 | 12 | 7655803  | <i>CD163</i>      | 2 | EGFR and pan-negative |
| cg07264679 | 12 | 7657396  | <i>CD163</i>      | 2 | EGFR and pan-negative |
| cg15992730 | 12 | 7848093  | <i>GDF3</i>       | 2 | EGFR and pan-negative |
| cg20972214 | 12 | 8088818  | <i>SLC2A3</i>     | 2 | EGFR and pan-negative |
| cg10338338 | 12 | 8088931  | <i>SLC2A3</i>     | 2 | EGFR and pan-negative |
| cg09546307 | 12 | 8664963  | <i>CLEC4D</i>     | 2 | EGFR and pan-negative |
| cg14162076 | 12 | 8665092  | <i>CLEC4D</i>     | 2 | EGFR and pan-negative |
| cg22984277 | 12 | 8694212  | <i>CLEC4E</i>     | 2 | EGFR and pan-negative |
| cg06256735 | 12 | 8815894  | <i>MFAP5</i>      | 2 | EGFR and pan-negative |
| cg00443307 | 12 | 9141740  | <i>KLRG1</i>      | 2 | EGFR and pan-negative |
| cg14913610 | 12 | 9142341  | <i>KLRG1</i>      | 2 | EGFR and pan-negative |
| cg01714932 | 12 | 9360854  | <i>PZP</i>        | 2 | EGFR and pan-negative |
| cg25136926 | 12 | 9602219  | <i>DDX12P</i>     | 2 | EGFR and pan-negative |
| cg13553498 | 12 | 9821986  | <i>CLEC2D</i>     | 2 | EGFR and pan-negative |
| cg12810837 | 12 | 9822287  | <i>CLEC2D</i>     | 2 | EGFR and pan-negative |
| cg09565688 | 12 | 10161879 | <i>CLEC12B</i>    | 2 | EGFR and pan-negative |
| cg07829804 | 12 | 10325287 | <i>OLR1</i>       | 2 | EGFR and pan-negative |
| cg21474838 | 12 | 10460612 | <i>KLRD1</i>      | 2 | EGFR and pan-negative |
| cg00616129 | 12 | 10827014 | <i>STYK1</i>      | 2 | EGFR and pan-negative |
| cg14076161 | 12 | 11463379 | <i>PRB4</i>       | 2 | EGFR and pan-negative |
| cg22692158 | 12 | 11463844 | <i>PRB4</i>       | 2 | EGFR and pan-negative |
| cg04520391 | 12 | 11507917 | <i>PRB1</i>       | 2 | EGFR and pan-negative |
| cg27345534 | 12 | 11509583 | <i>PRB1</i>       | 2 | EGFR and pan-negative |
| cg18142353 | 12 | 12420574 | <i>LRP6</i>       | 2 | EGFR and pan-negative |
| cg14059963 | 12 | 12815026 | <i>GPR19</i>      | 2 | EGFR and pan-negative |
| cg26244225 | 12 | 12938082 | <i>APOLD1</i>     | 2 | EGFR and pan-negative |
| cg14463304 | 12 | 12965884 | <i>DDX47</i>      | 2 | EGFR and pan-negative |
| cg06776256 | 12 | 13043728 | <i>GPRC5A</i>     | 2 | EGFR and pan-negative |
| cg23773532 | 12 | 13103216 | <i>GPRC5D</i>     | 2 | EGFR and pan-negative |
| cg04588079 | 12 | 13153012 | <i>HEBP1</i>      | 2 | EGFR and pan-negative |
| cg13264741 | 12 | 14133426 | <i>GRIN2B</i>     | 2 | EGFR and pan-negative |
| cg18754342 | 12 | 14849268 | <i>GUCY2C</i>     | 2 | EGFR and pan-negative |
| cg05060662 | 12 | 14923882 | <i>HIST4H4</i>    | 2 | EGFR and pan-negative |
| cg13302154 | 12 | 15039432 | <i>MGP</i>        | 2 | EGFR and pan-negative |
| cg09447105 | 12 | 15126020 | <i>PDE6H</i>      | 2 | EGFR and pan-negative |
| cg19205533 | 12 | 15373987 | <i>RRG</i>        | 2 | EGFR and pan-negative |
| cg19402885 | 12 | 15475236 | <i>PTPRO</i>      | 2 | EGFR and pan-negative |
| cg06357925 | 12 | 15475331 | <i>PTPRO</i>      | 2 | EGFR and pan-negative |
| cg10646402 | 12 | 15475490 | <i>PTPRO</i>      | 2 | EGFR and pan-negative |
| cg09126273 | 12 | 15475767 | <i>PTPRO</i>      | 2 | EGFR and pan-negative |
| cg09440289 | 12 | 15475990 | <i>PTPRO</i>      | 2 | EGFR and pan-negative |
| cg09470640 | 12 | 15476028 | <i>PTPRO</i>      | 2 | EGFR and pan-negative |
| cg11843304 | 12 | 15501337 | <i>PTPRO</i>      | 2 | EGFR and pan-negative |
| cg11203041 | 12 | 16500185 | <i>MGST1</i>      | 2 | EGFR and pan-negative |
| cg19229991 | 12 | 18242549 | <i>RERGL</i>      | 2 | EGFR and pan-negative |
| cg23367478 | 12 | 20521299 | <i>PDE3A</i>      | 2 | EGFR and pan-negative |
| cg24975564 | 12 | 20522236 | <i>PDE3A</i>      | 2 | EGFR and pan-negative |
| cg04091078 | 12 | 20848285 | <i>SLCO1C1</i>    | 2 | EGFR and pan-negative |
| cg18109798 | 12 | 20848473 | <i>SLCO1C1</i>    | 2 | EGFR and pan-negative |
| cg00995065 | 12 | 21283725 | <i>SLCO1B1</i>    | 2 | EGFR and pan-negative |
| cg06141025 | 12 | 21757466 | <i>GYS2</i>       | 2 | EGFR and pan-negative |
| cg01226811 | 12 | 21927612 | <i>KCNJ8</i>      | 2 | EGFR and pan-negative |
| cg02007844 | 12 | 21927990 | <i>KCNJ8</i>      | 2 | EGFR and pan-negative |
| cg20025970 | 12 | 22089560 | <i>ABCC9</i>      | 2 | EGFR and pan-negative |
| cg24723331 | 12 | 22487219 | <i>ST8SIA1</i>    | 2 | EGFR and pan-negative |
| cg04926244 | 12 | 24737251 | <i>LINC00477</i>  | 2 | EGFR and pan-negative |
| cg07537523 | 12 | 25102311 | <i>BCAT1</i>      | 2 | EGFR and pan-negative |
| cg10150530 | 12 | 25205468 | <i>LRMP</i>       | 2 | EGFR and pan-negative |
| cg10412312 | 12 | 25705861 | <i>IFLTD1</i>     | 2 | EGFR and pan-negative |
| cg02677802 | 12 | 26822870 | <i>ITPR2</i>      | 2 | EGFR and pan-negative |
| cg09257092 | 12 | 26986805 | <i>ITPR2</i>      | 2 | EGFR and pan-negative |
| cg01982833 | 12 | 27174596 | <i>MED21</i>      | 2 | EGFR and pan-negative |
| cg05697976 | 12 | 29376483 | <i>FAR2</i>       | 2 | EGFR and pan-negative |
| cg21522988 | 12 | 29376872 | <i>FAR2</i>       | 2 | EGFR and pan-negative |
| cg20784775 | 12 | 29937585 | <i>TMTC1</i>      | 2 | EGFR and pan-negative |
| cg05681757 | 12 | 32655034 | <i>FGD4</i>       | 2 | EGFR and pan-negative |
| cg27387222 | 12 | 32831504 | <i>DNM1L</i>      | 2 | EGFR and pan-negative |
| cg03302287 | 12 | 33049650 | <i>PKP2</i>       | 2 | EGFR and pan-negative |
| cg00902195 | 12 | 33592500 | <i>SYT10</i>      | 2 | EGFR and pan-negative |
| cg23950724 | 12 | 33593177 | <i>SYT10</i>      | 2 | EGFR and pan-negative |
| cg23495733 | 12 | 39299132 | <i>CPNE8</i>      | 2 | EGFR and pan-negative |
| cg27352992 | 12 | 41087092 | <i>CNTN1</i>      | 2 | EGFR and pan-negative |
| cg20352371 | 12 | 41831595 | <i>PDZRN4</i>     | 2 | EGFR and pan-negative |
| cg22396129 | 12 | 42721145 | <i>PHLN1</i>      | 2 | EGFR and pan-negative |
| cg27465569 | 12 | 44153853 | <i>IRAK4</i>      | 2 | EGFR and pan-negative |
| cg14904464 | 12 | 45269790 | <i>NELL2</i>      | 2 | EGFR and pan-negative |
| cg06110728 | 12 | 45270886 | <i>NELL2</i>      | 2 | EGFR and pan-negative |
| cg15584813 | 12 | 47219626 | <i>SLC38A4</i>    | 2 | EGFR and pan-negative |
| cg07601320 | 12 | 47219841 | <i>SLC38A4</i>    | 2 | EGFR and pan-negative |
| cg03569637 | 12 | 47609357 | <i>PCED1B</i>     | 2 | EGFR and pan-negative |
| cg05596756 | 12 | 47610220 | <i>PCED1B-AS1</i> | 2 | EGFR and pan-negative |
| cg09869858 | 12 | 48120416 | <i>ENDOU</i>      | 2 | EGFR and pan-negative |
| cg08045757 | 12 | 48192686 | <i>HDAC7</i>      | 2 | EGFR and pan-negative |
| cg01291404 | 12 | 48397872 | <i>COL2A1</i>     | 2 | EGFR and pan-negative |

|            |    |          |          |   |                       |
|------------|----|----------|----------|---|-----------------------|
| cg19601035 | 12 | 48399140 | COL2A1   | 2 | EGFR and pan-negative |
| cg27446233 | 12 | 48516484 | PFKM     | 2 | EGFR and pan-negative |
| cg05795313 | 12 | 48745136 | ZNF641   | 2 | EGFR and pan-negative |
| cg13003163 | 12 | 48866481 | ANP32D   | 2 | EGFR and pan-negative |
| cg21674595 | 12 | 48877384 | C12orf54 | 2 | EGFR and pan-negative |
| cg01726767 | 12 | 48965123 | LALBA    | 2 | EGFR and pan-negative |
| cg08958015 | 12 | 49297901 | CCDC65   | 2 | EGFR and pan-negative |
| cg02620769 | 12 | 49298070 | CCDC65   | 2 | EGFR and pan-negative |
| cg13007988 | 12 | 49449136 | KMT2D    | 2 | EGFR and pan-negative |
| cg03549571 | 12 | 49488198 | DHH      | 2 | EGFR and pan-negative |
| cg09595479 | 12 | 49689212 | PRPH     | 2 | EGFR and pan-negative |
| cg19256236 | 12 | 49932216 | KCNH3    | 2 | EGFR and pan-negative |
| cg07047653 | 12 | 50344626 | AQP2     | 2 | EGFR and pan-negative |
| cg19220825 | 12 | 50353951 | AQP5     | 2 | EGFR and pan-negative |
| cg24352499 | 12 | 50360776 | 0        | 2 | EGFR and pan-negative |
| cg07210490 | 12 | 50479634 | SMARCD1  | 2 | EGFR and pan-negative |
| cg26333317 | 12 | 51319063 | METTL7A  | 2 | EGFR and pan-negative |
| cg21513385 | 12 | 51663484 | SMAGP    | 2 | EGFR and pan-negative |
| cg10999429 | 12 | 52300973 | ACVRL1   | 2 | EGFR and pan-negative |
| cg04034767 | 12 | 52400907 | GRASP    | 2 | EGFR and pan-negative |
| cg03533058 | 12 | 52437571 | NR4A1    | 2 | EGFR and pan-negative |
| cg24506604 | 12 | 52579502 | KRT80    | 2 | EGFR and pan-negative |
| cg11051139 | 12 | 52580428 | KRT80    | 2 | EGFR and pan-negative |
| cg16911220 | 12 | 52695728 | KRT86    | 2 | EGFR and pan-negative |
| cg19258973 | 12 | 52714891 | KRT83    | 2 | EGFR and pan-negative |
| cg21518208 | 12 | 52761416 | KRT85    | 2 | EGFR and pan-negative |
| cg24461814 | 12 | 52779281 | KRT84    | 2 | EGFR and pan-negative |
| cg18153060 | 12 | 52779793 | KRT84    | 2 | EGFR and pan-negative |
| cg24926042 | 12 | 52799999 | KRT82    | 2 | EGFR and pan-negative |
| cg13696887 | 12 | 52800423 | KRT82    | 2 | EGFR and pan-negative |
| cg20256783 | 12 | 52827847 | KRT75    | 2 | EGFR and pan-negative |
| cg17255302 | 12 | 52828461 | KRT75    | 2 | EGFR and pan-negative |
| cg13181284 | 12 | 52845687 | KRT6B    | 2 | EGFR and pan-negative |
| cg12795208 | 12 | 52845938 | KRT6B    | 2 | EGFR and pan-negative |
| cg08136806 | 12 | 52867793 | KRT6C    | 2 | EGFR and pan-negative |
| cg00213044 | 12 | 52886438 | KRT6A    | 2 | EGFR and pan-negative |
| cg16112157 | 12 | 52887685 | KRT6A    | 2 | EGFR and pan-negative |
| cg01853981 | 12 | 52946482 | KRT71    | 2 | EGFR and pan-negative |
| cg23767977 | 12 | 52947465 | KRT71    | 2 | EGFR and pan-negative |
| cg20200335 | 12 | 52967554 | KRT74    | 2 | EGFR and pan-negative |
| cg06494782 | 12 | 52995446 | KRT72    | 2 | EGFR and pan-negative |
| cg13928961 | 12 | 53012009 | KRT73    | 2 | EGFR and pan-negative |
| cg07017706 | 12 | 53013331 | KRT73    | 2 | EGFR and pan-negative |
| cg16405957 | 12 | 53045793 | KRT2     | 2 | EGFR and pan-negative |
| cg00463848 | 12 | 53046105 | KRT2     | 2 | EGFR and pan-negative |
| cg10766289 | 12 | 53073506 | KRT1     | 2 | EGFR and pan-negative |
| cg17405586 | 12 | 53074257 | KRT1     | 2 | EGFR and pan-negative |
| cg18982568 | 12 | 53097169 | KRT77    | 2 | EGFR and pan-negative |
| cg11465372 | 12 | 53171191 | KRT76    | 2 | EGFR and pan-negative |
| cg12610744 | 12 | 53208762 | KRT4     | 2 | EGFR and pan-negative |
| cg11845202 | 12 | 53242392 | KRT78    | 2 | EGFR and pan-negative |
| cg07265310 | 12 | 53242922 | KRT78    | 2 | EGFR and pan-negative |
| cg20324165 | 12 | 53299145 | KRT8     | 2 | EGFR and pan-negative |
| cg01835489 | 12 | 53299310 | KRT8     | 2 | EGFR and pan-negative |
| cg19812619 | 12 | 53600654 | ITGB7    | 2 | EGFR and pan-negative |
| cg12820608 | 12 | 53626390 | RARG     | 2 | EGFR and pan-negative |
| cg22546318 | 12 | 54070378 | ATP5G2   | 2 | EGFR and pan-negative |
| cg08995424 | 12 | 54070891 | ATP5G2   | 2 | EGFR and pan-negative |
| cg19928450 | 12 | 54348629 | HOXC12   | 2 | EGFR and pan-negative |
| cg05589246 | 12 | 54348719 | HOXC12   | 2 | EGFR and pan-negative |
| cg26829131 | 12 | 54393375 | HOXC9    | 2 | EGFR and pan-negative |
| cg25917510 | 12 | 54402888 | HOXC8    | 2 | EGFR and pan-negative |
| cg05022306 | 12 | 54403254 | HOXC8    | 2 | EGFR and pan-negative |
| cg21487207 | 12 | 54410576 | HOXC5    | 2 | EGFR and pan-negative |
| cg10918927 | 12 | 54411193 | HOXC5    | 2 | EGFR and pan-negative |
| cg00187380 | 12 | 54427384 | MIR615   | 2 | EGFR and pan-negative |
| cg15700739 | 12 | 54427700 | MIR615   | 2 | EGFR and pan-negative |
| cg24488435 | 12 | 54583029 | SMUG1    | 2 | EGFR and pan-negative |
| cg09457245 | 12 | 54778750 | ZNF385A  | 2 | EGFR and pan-negative |
| cg04450876 | 12 | 54866945 | GTSF1    | 2 | EGFR and pan-negative |
| cg20576002 | 12 | 54867653 | GTSF1    | 2 | EGFR and pan-negative |
| cg17605084 | 12 | 54891491 | NCKAP1L  | 2 | EGFR and pan-negative |
| cg01316819 | 12 | 54982281 | PPP1R1A  | 2 | EGFR and pan-negative |
| cg10125195 | 12 | 55028545 | LACRT    | 2 | EGFR and pan-negative |
| cg07643942 | 12 | 55029147 | LACRT    | 2 | EGFR and pan-negative |
| cg13396068 | 12 | 55041379 | DCD      | 2 | EGFR and pan-negative |
| cg25372195 | 12 | 55042293 | DCD      | 2 | EGFR and pan-negative |
| cg17532978 | 12 | 55413394 | NEUROD4  | 2 | EGFR and pan-negative |
| cg09014354 | 12 | 55413878 | NEUROD4  | 2 | EGFR and pan-negative |
| cg15702701 | 12 | 56075367 | METTL7B  | 2 | EGFR and pan-negative |
| cg11380624 | 12 | 56222881 | TMEM198B | 2 | EGFR and pan-negative |
| cg16725130 | 12 | 56236647 | MMP19    | 2 | EGFR and pan-negative |
| cg15870225 | 12 | 56617083 | NABP2    | 2 | EGFR and pan-negative |
| cg00668685 | 12 | 56624552 | SLC39A5  | 2 | EGFR and pan-negative |
| cg03343942 | 12 | 56625109 | SLC39A5  | 2 | EGFR and pan-negative |
| cg03986640 | 12 | 56848355 | MIP      | 2 | EGFR and pan-negative |
| cg02658214 | 12 | 57327964 | SDR9C7   | 2 | EGFR and pan-negative |
| cg13446622 | 12 | 57328406 | SDR9C7   | 2 | EGFR and pan-negative |
| cg19824441 | 12 | 57388312 | GPR182   | 2 | EGFR and pan-negative |
| cg08640498 | 12 | 57828515 | INHBC    | 2 | EGFR and pan-negative |
| cg03399971 | 12 | 57828847 | INHBC    | 2 | EGFR and pan-negative |
| cg20664201 | 12 | 57849270 | INHBE    | 2 | EGFR and pan-negative |
| cg06616245 | 12 | 57854236 | GLI1     | 2 | EGFR and pan-negative |
| cg14338062 | 12 | 57883279 | MARS     | 2 | EGFR and pan-negative |
| cg04270799 | 12 | 57944059 | KIF5A    | 2 | EGFR and pan-negative |

|            |    |           |           |   |                       |
|------------|----|-----------|-----------|---|-----------------------|
| cg25133016 | 12 | 57984719  | PIP4K2C   | 2 | EGFR and pan-negative |
| cg02364642 | 12 | 58005758  | ARHGEF25  | 2 | EGFR and pan-negative |
| cg22199080 | 12 | 58135833  | AGAP2     | 2 | EGFR and pan-negative |
| cg18413900 | 12 | 58160989  | CYP27B1   | 2 | EGFR and pan-negative |
| cg19985911 | 12 | 58209674  | AVIL      | 2 | EGFR and pan-negative |
| cg02732509 | 12 | 58241200  | CTDSP2    | 2 | EGFR and pan-negative |
| cg11871280 | 12 | 60082038  | SLC16A7   | 2 | EGFR and pan-negative |
| cg00626466 | 12 | 65153982  | GNS       | 2 | EGFR and pan-negative |
| cg19427610 | 12 | 65515031  | WIF1      | 2 | EGFR and pan-negative |
| cg03251079 | 12 | 66218285  | HMGA2     | 2 | EGFR and pan-negative |
| cg07914866 | 12 | 66583431  | IRAK3     | 2 | EGFR and pan-negative |
| cg21281799 | 12 | 68041322  | DYRK2     | 2 | EGFR and pan-negative |
| cg22621695 | 12 | 68042799  | DYRK2     | 2 | EGFR and pan-negative |
| cg26227465 | 12 | 68553577  | IFNG      | 2 | EGFR and pan-negative |
| cg25697314 | 12 | 68619556  | IL26      | 2 | EGFR and pan-negative |
| cg08338368 | 12 | 68620926  | IL26      | 2 | EGFR and pan-negative |
| cg26333641 | 12 | 68647015  | IL22      | 2 | EGFR and pan-negative |
| cg07618900 | 12 | 70093350  | BEST3     | 2 | EGFR and pan-negative |
| cg06362985 | 12 | 70132208  | RAB3IP    | 2 | EGFR and pan-negative |
| cg23694248 | 12 | 71314315  | PTPRR     | 2 | EGFR and pan-negative |
| cg04969878 | 12 | 72079240  | TMEM19    | 2 | EGFR and pan-negative |
| cg01817029 | 12 | 72665510  | TRHDE     | 2 | EGFR and pan-negative |
| cg13663218 | 12 | 72666976  | TRHDE-AS1 | 2 | EGFR and pan-negative |
| cg18573383 | 12 | 75603401  | KCNC2     | 2 | EGFR and pan-negative |
| cg11631518 | 12 | 75603585  | KCNC2     | 2 | EGFR and pan-negative |
| cg07684809 | 12 | 75728212  | GLIPR1L1  | 2 | EGFR and pan-negative |
| cg21087137 | 12 | 75728469  | GLIPR1L1  | 2 | EGFR and pan-negative |
| cg02789485 | 12 | 75783428  | GLIPR1L2  | 2 | EGFR and pan-negative |
| cg20291222 | 12 | 75784541  | GLIPR1L2  | 2 | EGFR and pan-negative |
| cg20217872 | 12 | 78224480  | NAV3      | 2 | EGFR and pan-negative |
| cg09111484 | 12 | 80749651  | OTOGL     | 2 | EGFR and pan-negative |
| cg26711820 | 12 | 81101689  | MYF6      | 2 | EGFR and pan-negative |
| cg05647859 | 12 | 81331718  | LIN7A     | 2 | EGFR and pan-negative |
| cg00354572 | 12 | 81471419  | ACSS3     | 2 | EGFR and pan-negative |
| cg01283289 | 12 | 81472177  | ACSS3     | 2 | EGFR and pan-negative |
| cg00685836 | 12 | 82153256  | PPFIA2    | 2 | EGFR and pan-negative |
| cg14449051 | 12 | 85306474  | SLC6A15   | 2 | EGFR and pan-negative |
| cg02409351 | 12 | 85674022  | ALX1      | 2 | EGFR and pan-negative |
| cg25741452 | 12 | 88974161  | KITLG     | 2 | EGFR and pan-negative |
| cg18422443 | 12 | 88974386  | KITLG     | 2 | EGFR and pan-negative |
| cg16606638 | 12 | 89918221  | GALNT4    | 2 | EGFR and pan-negative |
| cg24171152 | 12 | 90051243  | ATP2B1    | 2 | EGFR and pan-negative |
| cg11768416 | 12 | 91348697  | CCER1     | 2 | EGFR and pan-negative |
| cg10967280 | 12 | 91348999  | CCER1     | 2 | EGFR and pan-negative |
| cg10634424 | 12 | 91506893  | LUM       | 2 | EGFR and pan-negative |
| cg12275348 | 12 | 93966045  | SOCs2     | 2 | EGFR and pan-negative |
| cg11225410 | 12 | 93966317  | SOCs2     | 2 | EGFR and pan-negative |
| cg22125370 | 12 | 93966485  | SOCs2     | 2 | EGFR and pan-negative |
| cg04797323 | 12 | 93966978  | SOCs2     | 2 | EGFR and pan-negative |
| cg06630241 | 12 | 93967711  | SOCs2     | 2 | EGFR and pan-negative |
| cg22141781 | 12 | 95397704  | NDUFA12   | 2 | EGFR and pan-negative |
| cg03453449 | 12 | 95945120  | USP44     | 2 | EGFR and pan-negative |
| cg04488758 | 12 | 95945366  | USP44     | 2 | EGFR and pan-negative |
| cg07236190 | 12 | 96338038  | AMDHD1    | 2 | EGFR and pan-negative |
| cg08965324 | 12 | 96429827  | LTA4H     | 2 | EGFR and pan-negative |
| cg06563300 | 12 | 100750811 | SLC17A8   | 2 | EGFR and pan-negative |
| cg16005224 | 12 | 101603174 | SLC5A8    | 2 | EGFR and pan-negative |
| cg20740029 | 12 | 101603835 | SLC5A8    | 2 | EGFR and pan-negative |
| cg05722918 | 12 | 101603929 | SLC5A8    | 2 | EGFR and pan-negative |
| cg16178491 | 12 | 101603996 | SLC5A8    | 2 | EGFR and pan-negative |
| cg01917648 | 12 | 101871337 | SPIC      | 2 | EGFR and pan-negative |
| cg01127428 | 12 | 102133040 | SYCP3     | 2 | EGFR and pan-negative |
| cg01305421 | 12 | 102874286 | IGF1      | 2 | EGFR and pan-negative |
| cg20053158 | 12 | 103351206 | ASCL1     | 2 | EGFR and pan-negative |
| cg07328579 | 12 | 104443770 | GLT8D2    | 2 | EGFR and pan-negative |
| cg21988041 | 12 | 104444060 | GLT8D2    | 2 | EGFR and pan-negative |
| cg10954182 | 12 | 104532377 | NFYB      | 2 | EGFR and pan-negative |
| cg26940261 | 12 | 105725112 | C12orf75  | 2 | EGFR and pan-negative |
| cg01920232 | 12 | 106976668 | RFX4      | 2 | EGFR and pan-negative |
| cg10126874 | 12 | 107487097 | CRY1      | 2 | EGFR and pan-negative |
| cg15796941 | 12 | 107711872 | BTBD11    | 2 | EGFR and pan-negative |
| cg08612037 | 12 | 107712210 | BTBD11    | 2 | EGFR and pan-negative |
| cg25995916 | 12 | 108155205 | PRDM4     | 2 | EGFR and pan-negative |
| cg06933965 | 12 | 108732994 | CMKLR1    | 2 | EGFR and pan-negative |
| cg16708012 | 12 | 108992114 | TMEM119   | 2 | EGFR and pan-negative |
| cg24497819 | 12 | 109027683 | SELPLG    | 2 | EGFR and pan-negative |
| cg11747499 | 12 | 109252653 | SSH1      | 2 | EGFR and pan-negative |
| cg07657776 | 12 | 109914065 | KCTD10    | 2 | EGFR and pan-negative |
| cg20092036 | 12 | 109914141 | KCTD10    | 2 | EGFR and pan-negative |
| cg19615059 | 12 | 110270919 | MIR4497   | 2 | EGFR and pan-negative |
| cg06236061 | 12 | 110317318 | GLTP      | 2 | EGFR and pan-negative |
| cg07836370 | 12 | 110318755 | GLTP      | 2 | EGFR and pan-negative |
| cg04235146 | 12 | 110718311 | ATP2A2    | 2 | EGFR and pan-negative |
| cg00278366 | 12 | 110940287 | RAD9B     | 2 | EGFR and pan-negative |
| cg24353217 | 12 | 111358188 | MYL2      | 2 | EGFR and pan-negative |
| cg17190608 | 12 | 111471489 | CUX2      | 2 | EGFR and pan-negative |
| cg24530795 | 12 | 111807189 | FAM109A   | 2 | EGFR and pan-negative |
| cg12681402 | 12 | 113229989 | RPH3A     | 2 | EGFR and pan-negative |
| cg25668626 | 12 | 113343603 | OAS1      | 2 | EGFR and pan-negative |
| cg20870559 | 12 | 113416518 | OAS2      | 2 | EGFR and pan-negative |
| cg02939139 | 12 | 113574204 | RASAL1    | 2 | EGFR and pan-negative |
| cg04123409 | 12 | 113841617 | SDS       | 2 | EGFR and pan-negative |
| cg23182299 | 12 | 113909744 | LHX5      | 2 | EGFR and pan-negative |
| cg23922454 | 12 | 113910545 | LHX5      | 2 | EGFR and pan-negative |
| cg10530281 | 12 | 115122054 | TBX3      | 2 | EGFR and pan-negative |

|            |    |           |             |   |                       |
|------------|----|-----------|-------------|---|-----------------------|
| cg00297584 | 12 | 116971031 | LINC00173   | 2 | EGFR and pan-negative |
| cg03109701 | 12 | 117174758 | C12orf49    | 2 | EGFR and pan-negative |
| cg03538436 | 12 | 117799370 | NOS1        | 2 | EGFR and pan-negative |
| cg22189286 | 12 | 119616193 | HSPB8       | 2 | EGFR and pan-negative |
| cg07861564 | 12 | 119616618 | HSPB8       | 2 | EGFR and pan-negative |
| cg02498063 | 12 | 119772577 | CCDC60      | 2 | EGFR and pan-negative |
| cg01199721 | 12 | 120632764 | GCN1L1      | 2 | EGFR and pan-negative |
| cg16785344 | 12 | 120703817 | PXN         | 2 | EGFR and pan-negative |
| cg20380069 | 12 | 120806617 | MSI1        | 2 | EGFR and pan-negative |
| cg02883161 | 12 | 120807618 | MSI1        | 2 | EGFR and pan-negative |
| cg01535453 | 12 | 121163887 | ACADS       | 2 | EGFR and pan-negative |
| cg16175725 | 12 | 121416796 | HNF1A       | 2 | EGFR and pan-negative |
| cg19395441 | 12 | 121454451 | C12orf43    | 2 | EGFR and pan-negative |
| cg24997562 | 12 | 121476720 | OASL        | 2 | EGFR and pan-negative |
| cg11301598 | 12 | 121476792 | OASL        | 2 | EGFR and pan-negative |
| cg07602200 | 12 | 121570875 | P2RX7       | 2 | EGFR and pan-negative |
| cg27049761 | 12 | 122688708 | B3GNT4      | 2 | EGFR and pan-negative |
| cg05384917 | 12 | 123200953 | HCAR3       | 2 | EGFR and pan-negative |
| cg15447486 | 12 | 123201676 | HCAR3       | 2 | EGFR and pan-negative |
| cg07732037 | 12 | 123707827 | MPHOSPH9    | 2 | EGFR and pan-negative |
| cg14086122 | 12 | 123921793 | RILPL2      | 2 | EGFR and pan-negative |
| cg01110312 | 12 | 124116920 | GTF2H3      | 2 | EGFR and pan-negative |
| cg22580512 | 12 | 125002474 | NCOR2       | 2 | EGFR and pan-negative |
| cg22820108 | 12 | 125003218 | NCOR2       | 2 | EGFR and pan-negative |
| cg19777783 | 12 | 129309376 | SLC15A4     | 2 | EGFR and pan-negative |
| cg11877382 | 12 | 129338939 | GLT1D1      | 2 | EGFR and pan-negative |
| cg03469054 | 12 | 130387861 | TMEM132D    | 2 | EGFR and pan-negative |
| cg09847584 | 12 | 131002386 | RIMBP2      | 2 | EGFR and pan-negative |
| cg18081313 | 12 | 132378192 | ULK1        | 2 | EGFR and pan-negative |
| cg18877514 | 12 | 133262879 | POLE        | 2 | EGFR and pan-negative |
| cg21232015 | 12 | 133424221 | CHFR        | 2 | EGFR and pan-negative |
| cg02519218 | 12 | 133424286 | CHFR        | 2 | EGFR and pan-negative |
| cg20066677 | 12 | 133424420 | CHFR        | 2 | EGFR and pan-negative |
| cg24532476 | 12 | 133424566 | CHFR        | 2 | EGFR and pan-negative |
| cg13270853 | 12 | 133435649 | CHFR        | 2 | EGFR and pan-negative |
| cg00338702 | 12 | 133463694 | CHFR        | 2 | EGFR and pan-negative |
| cg06437862 | 13 | 19756096  | TUBA3C      | 2 | EGFR and pan-negative |
| cg19950767 | 13 | 20110871  | TPTE2       | 2 | EGFR and pan-negative |
| cg12428416 | 13 | 20717597  | GJA3        | 2 | EGFR and pan-negative |
| cg16547450 | 13 | 21141711  | IFT88       | 2 | EGFR and pan-negative |
| cg05714479 | 13 | 21634945  | LATS2       | 2 | EGFR and pan-negative |
| cg07440877 | 13 | 24523079  | ANKRD20A19P | 2 | EGFR and pan-negative |
| cg12682367 | 13 | 24523698  | ANKRD20A19P | 2 | EGFR and pan-negative |
| cg16991589 | 13 | 25670047  | PABPC3      | 2 | EGFR and pan-negative |
| cg00094319 | 13 | 25670530  | PABPC3      | 2 | EGFR and pan-negative |
| cg22029275 | 13 | 25745784  | AMER2       | 2 | EGFR and pan-negative |
| cg08532057 | 13 | 25875436  | NUPL1       | 2 | EGFR and pan-negative |
| cg22179082 | 13 | 27334259  | GPR12       | 2 | EGFR and pan-negative |
| cg26270746 | 13 | 28366498  | GSX1        | 2 | EGFR and pan-negative |
| cg26344532 | 13 | 28494174  | PDX1        | 2 | EGFR and pan-negative |
| cg17740399 | 13 | 28494177  | PDX1        | 2 | EGFR and pan-negative |
| cg01424107 | 13 | 28543113  | CDX2        | 2 | EGFR and pan-negative |
| cg07017374 | 13 | 28674451  | FLT3        | 2 | EGFR and pan-negative |
| cg24454143 | 13 | 28675265  | FLT3        | 2 | EGFR and pan-negative |
| cg10501128 | 13 | 29069100  | FLT1        | 2 | EGFR and pan-negative |
| cg08529529 | 13 | 31309799  | ALOX5AP     | 2 | EGFR and pan-negative |
| cg11126134 | 13 | 31480304  | MEDAG       | 2 | EGFR and pan-negative |
| cg24891133 | 13 | 31480335  | MEDAG       | 2 | EGFR and pan-negative |
| cg10923408 | 13 | 31506710  | TEX26-AS1   | 2 | EGFR and pan-negative |
| cg21431536 | 13 | 32313824  | RXFP2       | 2 | EGFR and pan-negative |
| cg00648883 | 13 | 32524761  | EEF1DP3     | 2 | EGFR and pan-negative |
| cg12836863 | 13 | 32889023  | BRCA2       | 2 | EGFR and pan-negative |
| cg12532500 | 13 | 33859636  | STARD13     | 2 | EGFR and pan-negative |
| cg25829729 | 13 | 36788667  | SOHLH2      | 2 | EGFR and pan-negative |
| cg26530497 | 13 | 36789025  | SOHLH2      | 2 | EGFR and pan-negative |
| cg18755783 | 13 | 36919905  | SPG20OS     | 2 | EGFR and pan-negative |
| cg27508002 | 13 | 37454023  | SMAD9       | 2 | EGFR and pan-negative |
| cg25306170 | 13 | 37680502  | CSNK1A1L    | 2 | EGFR and pan-negative |
| cg23032612 | 13 | 38173340  | POSTN       | 2 | EGFR and pan-negative |
| cg21432954 | 13 | 38443809  | TRPC4       | 2 | EGFR and pan-negative |
| cg21081971 | 13 | 38444765  | TRPC4       | 2 | EGFR and pan-negative |
| cg03712843 | 13 | 39565534  | STOML3      | 2 | EGFR and pan-negative |
| cg26301777 | 13 | 41884544  | NAA16       | 2 | EGFR and pan-negative |
| cg13614181 | 13 | 42031103  | RGCC        | 2 | EGFR and pan-negative |
| cg24222324 | 13 | 43145414  | TNFSF11     | 2 | EGFR and pan-negative |
| cg21094154 | 13 | 43146121  | TNFSF11     | 2 | EGFR and pan-negative |
| cg07409200 | 13 | 43354674  | FAM216B     | 2 | EGFR and pan-negative |
| cg26682500 | 13 | 43356116  | FAM216B     | 2 | EGFR and pan-negative |
| cg22539738 | 13 | 45562280  | NUFIP1      | 2 | EGFR and pan-negative |
| cg18843688 | 13 | 45563253  | NUFIP1      | 2 | EGFR and pan-negative |
| cg21457147 | 13 | 45768695  | KCTD4       | 2 | EGFR and pan-negative |
| cg04439215 | 13 | 45768901  | KCTD4       | 2 | EGFR and pan-negative |
| cg16140179 | 13 | 46275352  | SPERT       | 2 | EGFR and pan-negative |
| cg23101680 | 13 | 46277286  | SPERT       | 2 | EGFR and pan-negative |
| cg14662172 | 13 | 46679081  | CPB2        | 2 | EGFR and pan-negative |
| cg17771150 | 13 | 46756209  | LCP1        | 2 | EGFR and pan-negative |
| cg04341806 | 13 | 46757395  | LCP1        | 2 | EGFR and pan-negative |
| cg02250787 | 13 | 47470989  | HTR2A       | 2 | EGFR and pan-negative |
| cg19296958 | 13 | 48891270  | RB1         | 2 | EGFR and pan-negative |
| cg21512370 | 13 | 48990327  | LPAR6       | 2 | EGFR and pan-negative |
| cg13506226 | 13 | 48990685  | LPAR6       | 2 | EGFR and pan-negative |
| cg25002911 | 13 | 49039986  | RB1         | 2 | EGFR and pan-negative |
| cg02655204 | 13 | 49040050  | RB1         | 2 | EGFR and pan-negative |
| cg25165199 | 13 | 49107693  | RCBTB2      | 2 | EGFR and pan-negative |
| cg18236297 | 13 | 49280407  | CYSLTR2     | 2 | EGFR and pan-negative |

|            |    |           |          |   |                       |
|------------|----|-----------|----------|---|-----------------------|
| cg16886259 | 13 | 49281222  | CYSLTR2  | 2 | EGFR and pan-negative |
| cg07935568 | 13 | 49794126  | MLNR     | 2 | EGFR and pan-negative |
| cg02620013 | 13 | 49794681  | MLNR     | 2 | EGFR and pan-negative |
| cg17777592 | 13 | 49975418  | CAB39L   | 2 | EGFR and pan-negative |
| cg15207619 | 13 | 49975643  | CAB39L   | 2 | EGFR and pan-negative |
| cg20399252 | 13 | 50266227  | EBPL     | 2 | EGFR and pan-negative |
| cg02995295 | 13 | 51796962  | FAM124A  | 2 | EGFR and pan-negative |
| cg12071073 | 13 | 52436281  | CCDC70   | 2 | EGFR and pan-negative |
| cg02071074 | 13 | 52585283  | ATP7B    | 2 | EGFR and pan-negative |
| cg16114640 | 13 | 52980000  | THSD1    | 2 | EGFR and pan-negative |
| cg09174741 | 13 | 52981577  | THSD1    | 2 | EGFR and pan-negative |
| cg10246520 | 13 | 53601944  | OLFM4    | 2 | EGFR and pan-negative |
| cg12582008 | 13 | 53603286  | OLFM4    | 2 | EGFR and pan-negative |
| cg13806135 | 13 | 58205045  | PCDH17   | 2 | EGFR and pan-negative |
| cg14893163 | 13 | 58206036  | PCDH17   | 2 | EGFR and pan-negative |
| cg24949049 | 13 | 61013241  | TDRD3    | 2 | EGFR and pan-negative |
| cg01836044 | 13 | 61989203  | PCDH20   | 2 | EGFR and pan-negative |
| cg15182360 | 13 | 61989737  | PCDH20   | 2 | EGFR and pan-negative |
| cg25422943 | 13 | 67804733  | PCDH9    | 2 | EGFR and pan-negative |
| cg20523861 | 13 | 70682324  | KLHL1    | 2 | EGFR and pan-negative |
| cg15901783 | 13 | 77461426  | KCTD12   | 2 | EGFR and pan-negative |
| cg04290964 | 13 | 77564689  | CLN5     | 2 | EGFR and pan-negative |
| cg12120741 | 13 | 78492306  | EDNRB    | 2 | EGFR and pan-negative |
| cg15836660 | 13 | 78493128  | EDNRB    | 2 | EGFR and pan-negative |
| cg08983760 | 13 | 78549582  | EDNRB    | 2 | EGFR and pan-negative |
| cg18003135 | 13 | 78549657  | EDNRB    | 2 | EGFR and pan-negative |
| cg15604467 | 13 | 79177925  | POU4F1   | 2 | EGFR and pan-negative |
| cg11653500 | 13 | 80915061  | SPRY2    | 2 | EGFR and pan-negative |
| cg22417789 | 13 | 80915465  | SPRY2    | 2 | EGFR and pan-negative |
| cg25938646 | 13 | 84456681  | SLITRK1  | 2 | EGFR and pan-negative |
| cg09083627 | 13 | 88324597  | SLITRK5  | 2 | EGFR and pan-negative |
| cg16792800 | 13 | 93879361  | GPC6     | 2 | EGFR and pan-negative |
| cg09582042 | 13 | 95253676  | GPR180   | 2 | EGFR and pan-negative |
| cg19063972 | 13 | 95364908  | SOX21    | 2 | EGFR and pan-negative |
| cg00756058 | 13 | 96296844  | DZIP1    | 2 | EGFR and pan-negative |
| cg04101379 | 13 | 96297197  | DZIP1    | 2 | EGFR and pan-negative |
| cg00158308 | 13 | 97646341  | OXGR1    | 2 | EGFR and pan-negative |
| cg23037133 | 13 | 97646811  | OXGR1    | 2 | EGFR and pan-negative |
| cg02838877 | 13 | 97873877  | MBNL2    | 2 | EGFR and pan-negative |
| cg11675413 | 13 | 98829482  | RNF113B  | 2 | EGFR and pan-negative |
| cg10057295 | 13 | 99230004  | STK24    | 2 | EGFR and pan-negative |
| cg10694152 | 13 | 99404506  | SLC15A1  | 2 | EGFR and pan-negative |
| cg09626634 | 13 | 99960369  | GPR183   | 2 | EGFR and pan-negative |
| cg02600430 | 13 | 100623942 | ZIC5     | 2 | EGFR and pan-negative |
| cg24623271 | 13 | 100635002 | ZIC2     | 2 | EGFR and pan-negative |
| cg15202954 | 13 | 102068996 | NALCN    | 2 | EGFR and pan-negative |
| cg06960698 | 13 | 103054846 | FGF14    | 2 | EGFR and pan-negative |
| cg18312429 | 13 | 103718930 | SLC10A2  | 2 | EGFR and pan-negative |
| cg27226949 | 13 | 107187177 | EFNB2    | 2 | EGFR and pan-negative |
| cg14396117 | 13 | 109248047 | MYO16    | 2 | EGFR and pan-negative |
| cg14341579 | 13 | 110438906 | IRS2     | 2 | EGFR and pan-negative |
| cg19385139 | 13 | 110958361 | COL4A1   | 2 | EGFR and pan-negative |
| cg15262516 | 13 | 110958418 | COL4A1   | 2 | EGFR and pan-negative |
| cg27546237 | 13 | 110960452 | COL4A2   | 2 | EGFR and pan-negative |
| cg16427670 | 13 | 111766902 | ARHGEF7  | 2 | EGFR and pan-negative |
| cg00557354 | 13 | 111767899 | ARHGEF7  | 2 | EGFR and pan-negative |
| cg21624282 | 13 | 113030783 | SPACA7   | 2 | EGFR and pan-negative |
| cg26815414 | 13 | 113300120 | C13orf35 | 2 | EGFR and pan-negative |
| cg11668844 | 13 | 113655622 | MCF2L    | 2 | EGFR and pan-negative |
| cg26608199 | 13 | 113776126 | F10      | 2 | EGFR and pan-negative |
| cg21367957 | 13 | 113776252 | F10      | 2 | EGFR and pan-negative |
| cg09878269 | 13 | 113812524 | PROZ     | 2 | EGFR and pan-negative |
| cg03721967 | 13 | 114009720 | GRTP1    | 2 | EGFR and pan-negative |
| cg00463202 | 13 | 114107710 | ADPRHL1  | 2 | EGFR and pan-negative |
| cg14845091 | 13 | 114107956 | ADPRHL1  | 2 | EGFR and pan-negative |
| cg06811800 | 13 | 114312105 | ATP4B    | 2 | EGFR and pan-negative |
| cg09034896 | 13 | 114321466 | GRK1     | 2 | EGFR and pan-negative |
| cg14358743 | 13 | 114568252 | GAS6-AS2 | 2 | EGFR and pan-negative |
| cg16205058 | 14 | 20924369  | APEX1    | 2 | EGFR and pan-negative |
| cg10934032 | 14 | 21249405  | RNASE6   | 2 | EGFR and pan-negative |
| cg15910079 | 14 | 21359415  | RNASE3   | 2 | EGFR and pan-negative |
| cg07525077 | 14 | 21359943  | RNASE3   | 2 | EGFR and pan-negative |
| cg14030359 | 14 | 21493406  | NDRG2    | 2 | EGFR and pan-negative |
| cg18389810 | 14 | 21498887  | TPPP2    | 2 | EGFR and pan-negative |
| cg16627949 | 14 | 21526351  | RNASE8   | 2 | EGFR and pan-negative |
| cg00657582 | 14 | 21904906  | CHD8     | 2 | EGFR and pan-negative |
| cg19872681 | 14 | 23284518  | SLC7A7   | 2 | EGFR and pan-negative |
| cg09208010 | 14 | 23305780  | MMP14    | 2 | EGFR and pan-negative |
| cg17559711 | 14 | 23451724  | AJUBA    | 2 | EGFR and pan-negative |
| cg27601516 | 14 | 23452417  | AJUBA    | 2 | EGFR and pan-negative |
| cg03565081 | 14 | 23478970  | C14orf93 | 2 | EGFR and pan-negative |
| cg14386691 | 14 | 23479657  | C14orf93 | 2 | EGFR and pan-negative |
| cg03770548 | 14 | 23525040  | CDH24    | 2 | EGFR and pan-negative |
| cg27035169 | 14 | 23653098  | SLC7A8   | 2 | EGFR and pan-negative |
| cg25149155 | 14 | 23775777  | BCL2L2   | 2 | EGFR and pan-negative |
| cg01557297 | 14 | 23822017  | SLC22A17 | 2 | EGFR and pan-negative |
| cg19573166 | 14 | 23822408  | SLC22A17 | 2 | EGFR and pan-negative |
| cg17606785 | 14 | 23834808  | EFS      | 2 | EGFR and pan-negative |
| cg07197059 | 14 | 23836012  | EFS      | 2 | EGFR and pan-negative |
| cg14366598 | 14 | 23841754  | IL25     | 2 | EGFR and pan-negative |
| cg07258507 | 14 | 23842125  | IL25     | 2 | EGFR and pan-negative |
| cg00174500 | 14 | 23846479  | CMTM5    | 2 | EGFR and pan-negative |
| cg21301148 | 14 | 23878195  | MYH6     | 2 | EGFR and pan-negative |
| cg02945646 | 14 | 24037169  | AP1G2    | 2 | EGFR and pan-negative |
| cg25832796 | 14 | 24038103  | AP1G2    | 2 | EGFR and pan-negative |

|            |    |          |            |   |                       |
|------------|----|----------|------------|---|-----------------------|
| cg02916816 | 14 | 24047021 | JPH4       | 2 | EGFR and pan-negative |
| cg06536578 | 14 | 24048555 | JPH4       | 2 | EGFR and pan-negative |
| cg01545079 | 14 | 24541377 | CPNE6      | 2 | EGFR and pan-negative |
| cg26071823 | 14 | 24583182 | DCAF11     | 2 | EGFR and pan-negative |
| cg25268718 | 14 | 24604711 | PSME1      | 2 | EGFR and pan-negative |
| cg20542800 | 14 | 24782534 | LTB4R      | 2 | EGFR and pan-negative |
| cg16761581 | 14 | 24803807 | ADCY4      | 2 | EGFR and pan-negative |
| cg12265829 | 14 | 24804022 | ADCY4      | 2 | EGFR and pan-negative |
| cg22228134 | 14 | 25078609 | GZMH       | 2 | EGFR and pan-negative |
| cg06948294 | 14 | 25518624 | STXBP6     | 2 | EGFR and pan-negative |
| cg18488855 | 14 | 27066634 | NOVA1      | 2 | EGFR and pan-negative |
| cg21794225 | 14 | 30397464 | PRKD1      | 2 | EGFR and pan-negative |
| cg15301694 | 14 | 31496854 | AP4S1      | 2 | EGFR and pan-negative |
| cg05769169 | 14 | 34419832 | EGLN3      | 2 | EGFR and pan-negative |
| cg24276491 | 14 | 35009492 | EAPP       | 2 | EGFR and pan-negative |
| cg17685628 | 14 | 37051693 | NKX2-8     | 2 | EGFR and pan-negative |
| cg26620157 | 14 | 37130297 | PAX9       | 2 | EGFR and pan-negative |
| cg00509670 | 14 | 37130313 | PAX9       | 2 | EGFR and pan-negative |
| cg03611555 | 14 | 37641600 | SLC25A21   | 2 | EGFR and pan-negative |
| cg10644361 | 14 | 37667230 | MIPOL1     | 2 | EGFR and pan-negative |
| cg27590397 | 14 | 38677218 | SSTR1      | 2 | EGFR and pan-negative |
| cg14473145 | 14 | 38725656 | CLEC14A    | 2 | EGFR and pan-negative |
| cg13526007 | 14 | 42076710 | LRFN5      | 2 | EGFR and pan-negative |
| cg11700584 | 14 | 50088544 | MGAT2      | 2 | EGFR and pan-negative |
| cg17356181 | 14 | 50999707 | ATL1       | 2 | EGFR and pan-negative |
| cg06832950 | 14 | 51025891 | ATL1       | 2 | EGFR and pan-negative |
| cg03361068 | 14 | 51561562 | TRIM9      | 2 | EGFR and pan-negative |
| cg17347389 | 14 | 51562646 | TRIM9      | 2 | EGFR and pan-negative |
| cg01231779 | 14 | 52535887 | NID2       | 2 | EGFR and pan-negative |
| cg09516965 | 14 | 52734529 | PTGDR      | 2 | EGFR and pan-negative |
| cg06738602 | 14 | 52780634 | PTGER2     | 2 | EGFR and pan-negative |
| cg25823578 | 14 | 52781312 | PTGER2     | 2 | EGFR and pan-negative |
| cg20395072 | 14 | 53258601 | GNPNAT1    | 2 | EGFR and pan-negative |
| cg18555117 | 14 | 53620401 | DDHD1      | 2 | EGFR and pan-negative |
| cg14310034 | 14 | 54423433 | BMP4       | 2 | EGFR and pan-negative |
| cg03724882 | 14 | 54864244 | CDKN3      | 2 | EGFR and pan-negative |
| cg24256211 | 14 | 55035215 | SAMD4A     | 2 | EGFR and pan-negative |
| cg09329225 | 14 | 57734381 | AP5M1      | 2 | EGFR and pan-negative |
| cg09879869 | 14 | 57734464 | AP5M1      | 2 | EGFR and pan-negative |
| cg25097436 | 14 | 60336972 | RTN1       | 2 | EGFR and pan-negative |
| cg18871276 | 14 | 60386030 | LRRC9      | 2 | EGFR and pan-negative |
| cg01129459 | 14 | 60386828 | LRRC9      | 2 | EGFR and pan-negative |
| cg17884373 | 14 | 60711697 | PPM1A      | 2 | EGFR and pan-negative |
| cg27398547 | 14 | 60952738 | C14orf39   | 2 | EGFR and pan-negative |
| cg14611174 | 14 | 60975837 | SIX6       | 2 | EGFR and pan-negative |
| cg02583151 | 14 | 61116211 | SIX1       | 2 | EGFR and pan-negative |
| cg02282237 | 14 | 61788862 | PRKCH      | 2 | EGFR and pan-negative |
| cg06501084 | 14 | 63568195 | KCNH5      | 2 | EGFR and pan-negative |
| cg07092725 | 14 | 63568796 | KCNH5      | 2 | EGFR and pan-negative |
| cg18771300 | 14 | 63671737 | RHOJ       | 2 | EGFR and pan-negative |
| cg16792632 | 14 | 64761208 | ESR2       | 2 | EGFR and pan-negative |
| cg06459066 | 14 | 64855287 | MTHFD1     | 2 | EGFR and pan-negative |
| cg16319578 | 14 | 65007512 | HSPA2      | 2 | EGFR and pan-negative |
| cg24642523 | 14 | 65009265 | HSPA2      | 2 | EGFR and pan-negative |
| cg09643186 | 14 | 65409452 | GPX2       | 2 | EGFR and pan-negative |
| cg25006823 | 14 | 67982456 | TMEM229B   | 2 | EGFR and pan-negative |
| cg05633152 | 14 | 70263811 | SLC10A1    | 2 | EGFR and pan-negative |
| cg15239123 | 14 | 70346413 | SMOC1      | 2 | EGFR and pan-negative |
| cg05203877 | 14 | 70655686 | SLC8A3     | 2 | EGFR and pan-negative |
| cg14174099 | 14 | 70655862 | SLC8A3     | 2 | EGFR and pan-negative |
| cg05997860 | 14 | 70923895 | ADAM21     | 2 | EGFR and pan-negative |
| cg02998425 | 14 | 70924204 | ADAM21     | 2 | EGFR and pan-negative |
| cg16747567 | 14 | 71373858 | PCNX       | 2 | EGFR and pan-negative |
| cg25598083 | 14 | 74034893 | ACOT2      | 2 | EGFR and pan-negative |
| cg09119665 | 14 | 74181285 | PNMA1      | 2 | EGFR and pan-negative |
| cg12827555 | 14 | 74706031 | VSX2       | 2 | EGFR and pan-negative |
| cg22247240 | 14 | 74815187 | VRTN       | 2 | EGFR and pan-negative |
| cg26551843 | 14 | 75390007 | RPS6KL1    | 2 | EGFR and pan-negative |
| cg09937039 | 14 | 75989203 | BATF       | 2 | EGFR and pan-negative |
| cg20881054 | 14 | 77228508 | VASH1      | 2 | EGFR and pan-negative |
| cg18489434 | 14 | 77228510 | VASH1      | 2 | EGFR and pan-negative |
| cg24887211 | 14 | 77292625 | C14orf166B | 2 | EGFR and pan-negative |
| cg15501381 | 14 | 77737800 | NGB        | 2 | EGFR and pan-negative |
| cg07965823 | 14 | 77964712 | ISM2       | 2 | EGFR and pan-negative |
| cg26651233 | 14 | 85996101 | FLRT2      | 2 | EGFR and pan-negative |
| cg17410236 | 14 | 85996495 | FLRT2      | 2 | EGFR and pan-negative |
| cg15625636 | 14 | 88472437 | GPR65      | 2 | EGFR and pan-negative |
| cg17671157 | 14 | 88793036 | KCNK10     | 2 | EGFR and pan-negative |
| cg02136132 | 14 | 90527891 | KCNK13     | 2 | EGFR and pan-negative |
| cg25225073 | 14 | 90528983 | KCNK13     | 2 | EGFR and pan-negative |
| cg21700166 | 14 | 91720227 | GPR68      | 2 | EGFR and pan-negative |
| cg25729068 | 14 | 92303235 | TC2N       | 2 | EGFR and pan-negative |
| cg02028524 | 14 | 92573410 | ATXN3      | 2 | EGFR and pan-negative |
| cg15052901 | 14 | 92788602 | SLC24A4    | 2 | EGFR and pan-negative |
| cg12422450 | 14 | 93389891 | CHGA       | 2 | EGFR and pan-negative |
| cg27651218 | 14 | 93813520 | COX8C      | 2 | EGFR and pan-negative |
| cg08505473 | 14 | 94255513 | PRIMA1     | 2 | EGFR and pan-negative |
| cg20022541 | 14 | 94385395 | FAM181A    | 2 | EGFR and pan-negative |
| cg24520070 | 14 | 94462337 | LINC00521  | 2 | EGFR and pan-negative |
| cg09173897 | 14 | 94639732 | PPP4R4     | 2 | EGFR and pan-negative |
| cg05788638 | 14 | 94759020 | SERPINA10  | 2 | EGFR and pan-negative |
| cg19937039 | 14 | 94759767 | SERPINA10  | 2 | EGFR and pan-negative |
| cg09147827 | 14 | 94789853 | SERPINA6   | 2 | EGFR and pan-negative |
| cg24621042 | 14 | 94857275 | SERPINA1   | 2 | EGFR and pan-negative |
| cg05485062 | 14 | 94983863 | SERPINA12  | 2 | EGFR and pan-negative |

|            |    |           |            |   |                       |
|------------|----|-----------|------------|---|-----------------------|
| cg19042947 | 14 | 95027441  | SERPINA4   | 2 | EGFR and pan-negative |
| cg08495878 | 14 | 95027859  | SERPINA4   | 2 | EGFR and pan-negative |
| cg25889160 | 14 | 95046342  | SERPINA5   | 2 | EGFR and pan-negative |
| cg16937611 | 14 | 95048102  | SERPINA5   | 2 | EGFR and pan-negative |
| cg16507522 | 14 | 95077557  | SERPINA3   | 2 | EGFR and pan-negative |
| cg17291001 | 14 | 95107626  | SERPINA13P | 2 | EGFR and pan-negative |
| cg20804555 | 14 | 95235869  | GSC        | 2 | EGFR and pan-negative |
| cg19224837 | 14 | 95236615  | GSC        | 2 | EGFR and pan-negative |
| cg10145926 | 14 | 95875792  | LINC00341  | 2 | EGFR and pan-negative |
| cg01316071 | 14 | 95876996  | LINC00341  | 2 | EGFR and pan-negative |
| cg27504299 | 14 | 96152109  | TCL1B      | 2 | EGFR and pan-negative |
| cg14127336 | 14 | 96180319  | TCL1A      | 2 | EGFR and pan-negative |
| cg19070873 | 14 | 96505448  | C14orf132  | 2 | EGFR and pan-negative |
| cg16539629 | 14 | 96505722  | C14orf132  | 2 | EGFR and pan-negative |
| cg08328671 | 14 | 96671262  | BDKRB2     | 2 | EGFR and pan-negative |
| cg10528989 | 14 | 96722306  | BDKRB1     | 2 | EGFR and pan-negative |
| cg06906435 | 14 | 99177777  | C14orf177  | 2 | EGFR and pan-negative |
| cg24169915 | 14 | 99177987  | C14orf177  | 2 | EGFR and pan-negative |
| cg02452985 | 14 | 99737548  | BCL11B     | 2 | EGFR and pan-negative |
| cg06834875 | 14 | 100111263 | HHIPL1     | 2 | EGFR and pan-negative |
| cg02867079 | 14 | 100111269 | HHIPL1     | 2 | EGFR and pan-negative |
| cg17813891 | 14 | 100532036 | EVL        | 2 | EGFR and pan-negative |
| cg13673514 | 14 | 101035818 | BEGAIN     | 2 | EGFR and pan-negative |
| cg09971646 | 14 | 101194145 | DLK1       | 2 | EGFR and pan-negative |
| cg25836301 | 14 | 101292306 | MEG3       | 2 | EGFR and pan-negative |
| cg05711886 | 14 | 101292680 | MEG3       | 2 | EGFR and pan-negative |
| cg04291079 | 14 | 101294430 | MEG3       | 2 | EGFR and pan-negative |
| cg18412984 | 14 | 102604722 | HSP90AA1   | 2 | EGFR and pan-negative |
| cg01155039 | 14 | 103389814 | AMN        | 2 | EGFR and pan-negative |
| cg22392276 | 14 | 103988476 | CKB        | 2 | EGFR and pan-negative |
| cg12011267 | 14 | 104314583 | LINC00637  | 2 | EGFR and pan-negative |
| cg07613153 | 14 | 104436947 | TDRD9      | 2 | EGFR and pan-negative |
| cg00107187 | 14 | 105070998 | TMEM179    | 2 | EGFR and pan-negative |
| cg02043070 | 14 | 105190158 | ADSSL1     | 2 | EGFR and pan-negative |
| cg27394566 | 14 | 105391635 | PLD4       | 2 | EGFR and pan-negative |
| cg26514492 | 14 | 105531893 | GPR132     | 2 | EGFR and pan-negative |
| cg21435394 | 14 | 105648024 | NUDT14     | 2 | EGFR and pan-negative |
| cg23886551 | 14 | 105992619 | TMEM121    | 2 | EGFR and pan-negative |
| cg14804557 | 14 | 106139591 | ELK2AP     | 2 | EGFR and pan-negative |
| cg01753906 | 14 | 106140190 | ELK2AP     | 2 | EGFR and pan-negative |
| cg23663653 | 14 | 106209207 | 0          | 2 | EGFR and pan-negative |
| cg16878021 | 14 | 106209463 | 0          | 2 | EGFR and pan-negative |
| cg23988567 | 14 | 106237542 | 0          | 2 | EGFR and pan-negative |
| cg11560645 | 14 | 106238198 | 0          | 2 | EGFR and pan-negative |
| cg02507952 | 14 | 106390641 | KIAA0125   | 2 | EGFR and pan-negative |
| cg06907544 | 15 | 23255227  | GOLGA8I    | 2 | EGFR and pan-negative |
| cg20769842 | 15 | 23810238  | MKRN3      | 2 | EGFR and pan-negative |
| cg16131766 | 15 | 23810280  | MKRN3      | 2 | EGFR and pan-negative |
| cg03969797 | 15 | 23810664  | MKRN3      | 2 | EGFR and pan-negative |
| cg23234999 | 15 | 23811205  | MKRN3      | 2 | EGFR and pan-negative |
| cg02982734 | 15 | 23891048  | MAGEL2     | 2 | EGFR and pan-negative |
| cg21325760 | 15 | 23891402  | MAGEL2     | 2 | EGFR and pan-negative |
| cg11265941 | 15 | 25068738  | SNRPN      | 2 | EGFR and pan-negative |
| cg19803984 | 15 | 25068790  | SNRPN      | 2 | EGFR and pan-negative |
| cg26033681 | 15 | 25069376  | SNRPN      | 2 | EGFR and pan-negative |
| cg25978208 | 15 | 25093244  | SNRPN      | 2 | EGFR and pan-negative |
| cg02305723 | 15 | 25093456  | SNRPN      | 2 | EGFR and pan-negative |
| cg22678136 | 15 | 25093521  | SNRPN      | 2 | EGFR and pan-negative |
| cg25657700 | 15 | 25123491  | SNRPN      | 2 | EGFR and pan-negative |
| cg24993443 | 15 | 25123549  | SNRPN      | 2 | EGFR and pan-negative |
| cg21870668 | 15 | 25123731  | SNRPN      | 2 | EGFR and pan-negative |
| cg26410550 | 15 | 25229256  | PWAR5      | 2 | EGFR and pan-negative |
| cg07478122 | 15 | 25230421  | PWAR5      | 2 | EGFR and pan-negative |
| cg13994177 | 15 | 25296464  | SNORD116-1 | 2 | EGFR and pan-negative |
| cg10832166 | 15 | 25296628  | SNORD116-1 | 2 | EGFR and pan-negative |
| cg26389232 | 15 | 25296693  | SNORD116-1 | 2 | EGFR and pan-negative |
| cg09839960 | 15 | 25523494  | SNORD109B  | 2 | EGFR and pan-negative |
| cg22269180 | 15 | 25972025  | ATP10A     | 2 | EGFR and pan-negative |
| cg17793621 | 15 | 26108084  | ATP10A     | 2 | EGFR and pan-negative |
| cg24387380 | 15 | 27159158  | GABRA5     | 2 | EGFR and pan-negative |
| cg08099701 | 15 | 27160007  | GABRA5     | 2 | EGFR and pan-negative |
| cg27592112 | 15 | 27670095  | GABRG3     | 2 | EGFR and pan-negative |
| cg24244000 | 15 | 27670335  | GABRG3     | 2 | EGFR and pan-negative |
| cg11412582 | 15 | 28567519  | HERC2      | 2 | EGFR and pan-negative |
| cg19781053 | 15 | 30114912  | TJP1       | 2 | EGFR and pan-negative |
| cg07501965 | 15 | 30685190  | CHRFAM7A   | 2 | EGFR and pan-negative |
| cg06319346 | 15 | 30686892  | CHRFAM7A   | 2 | EGFR and pan-negative |
| cg22443330 | 15 | 31196599  | FAN1       | 2 | EGFR and pan-negative |
| cg14323928 | 15 | 31393845  | TRPM1      | 2 | EGFR and pan-negative |
| cg01421985 | 15 | 31947534  | OTUD7A     | 2 | EGFR and pan-negative |
| cg22458082 | 15 | 31947546  | OTUD7A     | 2 | EGFR and pan-negative |
| cg04785227 | 15 | 32321637  | CHRNA7     | 2 | EGFR and pan-negative |
| cg20861607 | 15 | 32323114  | CHRNA7     | 2 | EGFR and pan-negative |
| cg15787039 | 15 | 32934185  | SCG5       | 2 | EGFR and pan-negative |
| cg18145505 | 15 | 33009498  | GREM1      | 2 | EGFR and pan-negative |
| cg22927134 | 15 | 34349252  | CHRM5      | 2 | EGFR and pan-negative |
| cg26053864 | 15 | 35087635  | ACTC1      | 2 | EGFR and pan-negative |
| cg06048973 | 15 | 35088107  | ACTC1      | 2 | EGFR and pan-negative |
| cg23254045 | 15 | 38226454  | TMCO5A     | 2 | EGFR and pan-negative |
| cg03998348 | 15 | 38227285  | TMCO5A     | 2 | EGFR and pan-negative |
| cg20678353 | 15 | 38988560  | C15orf53   | 2 | EGFR and pan-negative |
| cg19392109 | 15 | 39542693  | C15orf54   | 2 | EGFR and pan-negative |
| cg22580173 | 15 | 39873304  | THBS1      | 2 | EGFR and pan-negative |
| cg01585703 | 15 | 40074646  | FSIP1      | 2 | EGFR and pan-negative |
| cg16543027 | 15 | 40599680  | PLCB2      | 2 | EGFR and pan-negative |

|            |    |          |           |   |                       |
|------------|----|----------|-----------|---|-----------------------|
| cg06595693 | 15 | 40649989 | DISP2     | 2 | EGFR and pan-negative |
| cg21824213 | 15 | 40886047 | CASC5     | 2 | EGFR and pan-negative |
| cg04968426 | 15 | 41120711 | PPP1R14D  | 2 | EGFR and pan-negative |
| cg23382741 | 15 | 41121320 | PPP1R14D  | 2 | EGFR and pan-negative |
| cg04868764 | 15 | 41137019 | SPINT1    | 2 | EGFR and pan-negative |
| cg02071305 | 15 | 41185973 | VPS18     | 2 | EGFR and pan-negative |
| cg26065841 | 15 | 41244853 | CHAC1     | 2 | EGFR and pan-negative |
| cg18705301 | 15 | 41695430 | NDUFAF1   | 2 | EGFR and pan-negative |
| cg15228639 | 15 | 42289939 | PLA2G4E   | 2 | EGFR and pan-negative |
| cg12308275 | 15 | 43558855 | TGM5      | 2 | EGFR and pan-negative |
| cg06813842 | 15 | 43910131 | STRC      | 2 | EGFR and pan-negative |
| cg23074453 | 15 | 44487924 | FRMD5     | 2 | EGFR and pan-negative |
| cg06121469 | 15 | 44956098 | SPG11     | 2 | EGFR and pan-negative |
| cg10517312 | 15 | 45027253 | TRIM69    | 2 | EGFR and pan-negative |
| cg20543571 | 15 | 45248878 | C15orf43  | 2 | EGFR and pan-negative |
| cg06424894 | 15 | 45314789 | SORD      | 2 | EGFR and pan-negative |
| cg15105703 | 15 | 45421860 | DUOXA1    | 2 | EGFR and pan-negative |
| cg10201668 | 15 | 45422393 | DUOX1     | 2 | EGFR and pan-negative |
| cg19409156 | 15 | 48413040 | SLC24A5   | 2 | EGFR and pan-negative |
| cg20226593 | 15 | 48498485 | SLC12A1   | 2 | EGFR and pan-negative |
| cg14930674 | 15 | 48500240 | SLC12A1   | 2 | EGFR and pan-negative |
| cg18671950 | 15 | 48936953 | FBN1      | 2 | EGFR and pan-negative |
| cg16711185 | 15 | 49255875 | SHC4      | 2 | EGFR and pan-negative |
| cg22873892 | 15 | 49447651 | COPS2     | 2 | EGFR and pan-negative |
| cg13021384 | 15 | 50474754 | SLC27A2   | 2 | EGFR and pan-negative |
| cg14694011 | 15 | 51631024 | CYP19A1   | 2 | EGFR and pan-negative |
| cg22886089 | 15 | 51973591 | SCG3      | 2 | EGFR and pan-negative |
| cg19686152 | 15 | 52121542 | TMOD3     | 2 | EGFR and pan-negative |
| cg00410576 | 15 | 52311136 | MAPK6     | 2 | EGFR and pan-negative |
| cg22870280 | 15 | 52404029 | BCL2L10   | 2 | EGFR and pan-negative |
| cg00413066 | 15 | 52405464 | BCL2L10   | 2 | EGFR and pan-negative |
| cg14120436 | 15 | 52483498 | GNB5      | 2 | EGFR and pan-negative |
| cg06720956 | 15 | 53082145 | ONECUT1   | 2 | EGFR and pan-negative |
| cg19850348 | 15 | 55880997 | PYGO1     | 2 | EGFR and pan-negative |
| cg00509616 | 15 | 57884415 | GCOM1     | 2 | EGFR and pan-negative |
| cg03365437 | 15 | 58357874 | ALDH1A2   | 2 | EGFR and pan-negative |
| cg00930873 | 15 | 58357973 | ALDH1A2   | 2 | EGFR and pan-negative |
| cg11577097 | 15 | 58430682 | AQP9      | 2 | EGFR and pan-negative |
| cg18809535 | 15 | 59498670 | LDHAL6B   | 2 | EGFR and pan-negative |
| cg19636871 | 15 | 59499391 | LDHAL6B   | 2 | EGFR and pan-negative |
| cg23877385 | 15 | 59908652 | GCNT3     | 2 | EGFR and pan-negative |
| cg22777952 | 15 | 60296425 | FOXB1     | 2 | EGFR and pan-negative |
| cg27167601 | 15 | 61521923 | RORA      | 2 | EGFR and pan-negative |
| cg00520135 | 15 | 63333846 | TPM1      | 2 | EGFR and pan-negative |
| cg00616135 | 15 | 63413614 | LACTB     | 2 | EGFR and pan-negative |
| cg15083227 | 15 | 65133289 | PLEKHO2   | 2 | EGFR and pan-negative |
| cg03775123 | 15 | 65214075 | ANKDD1A   | 2 | EGFR and pan-negative |
| cg10604168 | 15 | 65360370 | RASL12    | 2 | EGFR and pan-negative |
| cg03349935 | 15 | 65361335 | RASL12    | 2 | EGFR and pan-negative |
| cg20225681 | 15 | 65503447 | CILP      | 2 | EGFR and pan-negative |
| cg23323879 | 15 | 65504534 | CILP      | 2 | EGFR and pan-negative |
| cg16003238 | 15 | 65670876 | IGDCC3    | 2 | EGFR and pan-negative |
| cg07617246 | 15 | 65715951 | IGDCC4    | 2 | EGFR and pan-negative |
| cg22794078 | 15 | 65904012 | VWA9      | 2 | EGFR and pan-negative |
| cg12623088 | 15 | 66585521 | DIS3L     | 2 | EGFR and pan-negative |
| cg16330965 | 15 | 66790390 | SNAPC5    | 2 | EGFR and pan-negative |
| cg15166050 | 15 | 66857133 | LCTL      | 2 | EGFR and pan-negative |
| cg19418515 | 15 | 67539555 | AAGAB     | 2 | EGFR and pan-negative |
| cg19836283 | 15 | 68724690 | ITGA11    | 2 | EGFR and pan-negative |
| cg08290628 | 15 | 68936551 | CORO2B    | 2 | EGFR and pan-negative |
| cg20015855 | 15 | 68937562 | CORO2B    | 2 | EGFR and pan-negative |
| cg20082641 | 15 | 69590255 | PAQR5     | 2 | EGFR and pan-negative |
| cg08815652 | 15 | 71055727 | UACA      | 2 | EGFR and pan-negative |
| cg08592761 | 15 | 71146185 | LARP6     | 2 | EGFR and pan-negative |
| cg07890954 | 15 | 72102874 | NR2E3     | 2 | EGFR and pan-negative |
| cg18219418 | 15 | 72563529 | PARP6     | 2 | EGFR and pan-negative |
| cg16778903 | 15 | 72612567 | CELF6     | 2 | EGFR and pan-negative |
| cg19136717 | 15 | 72766740 | ARIH1     | 2 | EGFR and pan-negative |
| cg02860342 | 15 | 73661484 | HGN4      | 2 | EGFR and pan-negative |
| cg00133909 | 15 | 73977201 | CD276     | 2 | EGFR and pan-negative |
| cg12718562 | 15 | 74165861 | TBC1D21   | 2 | EGFR and pan-negative |
| cg00427635 | 15 | 74166372 | TBC1D21   | 2 | EGFR and pan-negative |
| cg14435807 | 15 | 74218780 | LOXL1     | 2 | EGFR and pan-negative |
| cg02077702 | 15 | 74465888 | ISLR      | 2 | EGFR and pan-negative |
| cg00075967 | 15 | 74495354 | STRA6     | 2 | EGFR and pan-negative |
| cg06285340 | 15 | 74659901 | CYP11A1   | 2 | EGFR and pan-negative |
| cg17790333 | 15 | 74660265 | CYP11A1   | 2 | EGFR and pan-negative |
| cg08025786 | 15 | 74899328 | CLK3      | 2 | EGFR and pan-negative |
| cg26704579 | 15 | 75018690 | CYP1A1    | 2 | EGFR and pan-negative |
| cg04968473 | 15 | 75040734 | CYP1A2    | 2 | EGFR and pan-negative |
| cg09207718 | 15 | 75041386 | CYP1A2    | 2 | EGFR and pan-negative |
| cg04008455 | 15 | 75661449 | MAN2C1    | 2 | EGFR and pan-negative |
| cg04914105 | 15 | 75872043 | PTPN9     | 2 | EGFR and pan-negative |
| cg14080001 | 15 | 75940555 | SNX33     | 2 | EGFR and pan-negative |
| cg27635271 | 15 | 75941576 | SNX33     | 2 | EGFR and pan-negative |
| cg23637791 | 15 | 76016262 | ODF3L1    | 2 | EGFR and pan-negative |
| cg12703269 | 15 | 77286232 | PSTPIP1   | 2 | EGFR and pan-negative |
| cg08130265 | 15 | 77519170 | LINC00597 | 2 | EGFR and pan-negative |
| cg27257408 | 15 | 78526836 | ACSBG1    | 2 | EGFR and pan-negative |
| cg27087809 | 15 | 78527410 | ACSBG1    | 2 | EGFR and pan-negative |
| cg23366752 | 15 | 78556502 | DNAJA4    | 2 | EGFR and pan-negative |
| cg16703647 | 15 | 78632592 | CRABP1    | 2 | EGFR and pan-negative |
| cg11200929 | 15 | 78632670 | CRABP1    | 2 | EGFR and pan-negative |
| cg23337754 | 15 | 78632859 | CRABP1    | 2 | EGFR and pan-negative |
| cg17133183 | 15 | 78632861 | CRABP1    | 2 | EGFR and pan-negative |

|            |    |           |           |   |                       |
|------------|----|-----------|-----------|---|-----------------------|
| cg19777470 | 15 | 78633455  | CRABP1    | 2 | EGFR and pan-negative |
| cg20550118 | 15 | 78633662  | CRABP1    | 2 | EGFR and pan-negative |
| cg22563815 | 15 | 78856949  | CHRNA5    | 2 | EGFR and pan-negative |
| cg04603031 | 15 | 78913156  | CHRNA3    | 2 | EGFR and pan-negative |
| cg23727043 | 15 | 79104124  | ADAMTS7   | 2 | EGFR and pan-negative |
| cg03589001 | 15 | 79164714  | MORF4L1   | 2 | EGFR and pan-negative |
| cg17788682 | 15 | 80697029  | ARNT2     | 2 | EGFR and pan-negative |
| cg20828084 | 15 | 81070851  | KIAA1199  | 2 | EGFR and pan-negative |
| cg13140464 | 15 | 83380023  | AP3B2     | 2 | EGFR and pan-negative |
| cg14696396 | 15 | 83776446  | TM6SF1    | 2 | EGFR and pan-negative |
| cg10398682 | 15 | 83952019  | BNC1      | 2 | EGFR and pan-negative |
| cg22946150 | 15 | 84116107  | SH3GL3    | 2 | EGFR and pan-negative |
| cg25381844 | 15 | 84116340  | SH3GL3    | 2 | EGFR and pan-negative |
| cg11611600 | 15 | 84323154  | ADAMTSL3  | 2 | EGFR and pan-negative |
| cg05243874 | 15 | 84898042  | LOC388152 | 2 | EGFR and pan-negative |
| cg19517291 | 15 | 85201039  | NMB       | 2 | EGFR and pan-negative |
| cg26232187 | 15 | 88799300  | NTRK3     | 2 | EGFR and pan-negative |
| cg02334775 | 15 | 89182676  | ISG20     | 2 | EGFR and pan-negative |
| cg06937608 | 15 | 89346044  | ACAN      | 2 | EGFR and pan-negative |
| cg18230771 | 15 | 89347176  | ACAN      | 2 | EGFR and pan-negative |
| cg10173075 | 15 | 89764836  | RLBP1     | 2 | EGFR and pan-negative |
| cg24653181 | 15 | 90039582  | RHCG      | 2 | EGFR and pan-negative |
| cg13042288 | 15 | 90349979  | ANPEP     | 2 | EGFR and pan-negative |
| cg01185080 | 15 | 90543813  | ZNF710    | 2 | EGFR and pan-negative |
| cg23208881 | 15 | 91411495  | FURIN     | 2 | EGFR and pan-negative |
| cg26377677 | 15 | 91412118  | FURIN     | 2 | EGFR and pan-negative |
| cg24888049 | 15 | 91426667  | FES       | 2 | EGFR and pan-negative |
| cg18661868 | 15 | 91427965  | FES       | 2 | EGFR and pan-negative |
| cg20339230 | 15 | 92937360  | ST8SIA2   | 2 | EGFR and pan-negative |
| cg17978274 | 15 | 93013676  | C15orf32  | 2 | EGFR and pan-negative |
| cg25455753 | 15 | 93014970  | C15orf32  | 2 | EGFR and pan-negative |
| cg04943986 | 15 | 96873868  | NR2F2     | 2 | EGFR and pan-negative |
| cg08370996 | 15 | 96874031  | NR2F2     | 2 | EGFR and pan-negative |
| cg01407341 | 15 | 97326798  | SPATA8    | 2 | EGFR and pan-negative |
| cg09149294 | 15 | 98503793  | ARRDC4    | 2 | EGFR and pan-negative |
| cg05595345 | 15 | 98504173  | ARRDC4    | 2 | EGFR and pan-negative |
| cg22375192 | 15 | 99193466  | IGF1R     | 2 | EGFR and pan-negative |
| cg13191049 | 15 | 99645663  | SYNM      | 2 | EGFR and pan-negative |
| cg12967560 | 15 | 100274195 | LYSMD4    | 2 | EGFR and pan-negative |
| cg17886204 | 15 | 100346994 | DNM1P46   | 2 | EGFR and pan-negative |
| cg08016383 | 15 | 100882020 | ADAMTS17  | 2 | EGFR and pan-negative |
| cg25004981 | 15 | 101085028 | CERS3     | 2 | EGFR and pan-negative |
| cg19224278 | 15 | 101419017 | ALDH1A3   | 2 | EGFR and pan-negative |
| cg19177941 | 15 | 101420185 | ALDH1A3   | 2 | EGFR and pan-negative |
| cg21359747 | 15 | 101420636 | ALDH1A3   | 2 | EGFR and pan-negative |
| cg07421682 | 15 | 102030850 | PCSK6     | 2 | EGFR and pan-negative |
| cg14820573 | 16 | 102121    | POLR3K    | 2 | EGFR and pan-negative |
| cg14747225 | 16 | 103024    | POLR3K    | 2 | EGFR and pan-negative |
| cg25473396 | 16 | 126819    | MPG       | 2 | EGFR and pan-negative |
| cg24399405 | 16 | 189577    | NPRL3     | 2 | EGFR and pan-negative |
| cg25425005 | 16 | 202905    | HBZ       | 2 | EGFR and pan-negative |
| cg21509023 | 16 | 222380    | HBA2      | 2 | EGFR and pan-negative |
| cg16263182 | 16 | 223399    | HBA2      | 2 | EGFR and pan-negative |
| cg19970051 | 16 | 226184    | HBA1      | 2 | EGFR and pan-negative |
| cg10647513 | 16 | 227203    | HBA1      | 2 | EGFR and pan-negative |
| cg27040030 | 16 | 325184    | RGS11     | 2 | EGFR and pan-negative |
| cg03390211 | 16 | 325826    | RGS11     | 2 | EGFR and pan-negative |
| cg21946698 | 16 | 326615    | RGS11     | 2 | EGFR and pan-negative |
| cg01344518 | 16 | 326728    | RGS11     | 2 | EGFR and pan-negative |
| cg27560922 | 16 | 330267    | ARHGDIG   | 2 | EGFR and pan-negative |
| cg15755548 | 16 | 331050    | ARHGDIG   | 2 | EGFR and pan-negative |
| cg10478221 | 16 | 679917    | WFIKK1    | 2 | EGFR and pan-negative |
| cg09864712 | 16 | 726786    | RHBDL1    | 2 | EGFR and pan-negative |
| cg09852871 | 16 | 739598    | WDR24     | 2 | EGFR and pan-negative |
| cg01934790 | 16 | 756400    | FBXL16    | 2 | EGFR and pan-negative |
| cg14100184 | 16 | 851298    | GNF13     | 2 | EGFR and pan-negative |
| cg21696393 | 16 | 1030401   | LMF1      | 2 | EGFR and pan-negative |
| cg21530890 | 16 | 1032260   | SOX8      | 2 | EGFR and pan-negative |
| cg24775607 | 16 | 1129057   | SSTR5     | 2 | EGFR and pan-negative |
| cg25760229 | 16 | 1203595   | CACNA1H   | 2 | EGFR and pan-negative |
| cg08321330 | 16 | 1280834   | TPSB2     | 2 | EGFR and pan-negative |
| cg05873268 | 16 | 1290058   | TPSAB1    | 2 | EGFR and pan-negative |
| cg27044702 | 16 | 1290763   | TPSAB1    | 2 | EGFR and pan-negative |
| cg01375871 | 16 | 1305420   | TPSD1     | 2 | EGFR and pan-negative |
| cg26499611 | 16 | 1384311   | BAIAP3    | 2 | EGFR and pan-negative |
| cg18282543 | 16 | 1384682   | BAIAP3    | 2 | EGFR and pan-negative |
| cg11911951 | 16 | 1430216   | UNKL      | 2 | EGFR and pan-negative |
| cg17706173 | 16 | 1582581   | TMEM204   | 2 | EGFR and pan-negative |
| cg11375102 | 16 | 1583810   | TMEM204   | 2 | EGFR and pan-negative |
| cg06730286 | 16 | 1657372   | IFT140    | 2 | EGFR and pan-negative |
| cg06810647 | 16 | 1665094   | CRAMP1L   | 2 | EGFR and pan-negative |
| cg01747665 | 16 | 1843424   | IGFALS    | 2 | EGFR and pan-negative |
| cg16270890 | 16 | 1875963   | HAGH      | 2 | EGFR and pan-negative |
| cg18279742 | 16 | 2015703   | RPS2      | 2 | EGFR and pan-negative |
| cg00043004 | 16 | 2030892   | NOXO1     | 2 | EGFR and pan-negative |
| cg08331960 | 16 | 2076597   | SLC9A3R2  | 2 | EGFR and pan-negative |
| cg24930915 | 16 | 2199120   | RAB26     | 2 | EGFR and pan-negative |
| cg25665528 | 16 | 2260870   | BRICD5    | 2 | EGFR and pan-negative |
| cg24237576 | 16 | 2285775   | DNASE1L2  | 2 | EGFR and pan-negative |
| cg12619509 | 16 | 2286601   | DNASE1L2  | 2 | EGFR and pan-negative |
| cg00949442 | 16 | 2391828   | ABCA17P   | 2 | EGFR and pan-negative |
| cg05483509 | 16 | 2563435   | ATP6V0C   | 2 | EGFR and pan-negative |
| cg14444710 | 16 | 2587080   | PDPK1     | 2 | EGFR and pan-negative |
| cg12391048 | 16 | 2770336   | PRSS27    | 2 | EGFR and pan-negative |
| cg20797766 | 16 | 2770866   | PRSS27    | 2 | EGFR and pan-negative |

|            |    |          |               |   |                       |
|------------|----|----------|---------------|---|-----------------------|
| cg19403023 | 16 | 2848797  | PRSS41        | 2 | EGFR and pan-negative |
| cg13644052 | 16 | 3010410  | 0             | 2 | EGFR and pan-negative |
| cg07384961 | 16 | 3068128  | CLDN6         | 2 | EGFR and pan-negative |
| cg26705553 | 16 | 3096711  | MMP25         | 2 | EGFR and pan-negative |
| cg07879977 | 16 | 3254567  | OR1F1         | 2 | EGFR and pan-negative |
| cg07842062 | 16 | 3306524  | MEFV          | 2 | EGFR and pan-negative |
| cg00128560 | 16 | 3352013  | TIGD7         | 2 | EGFR and pan-negative |
| cg02825709 | 16 | 3354207  | ZNF75A        | 2 | EGFR and pan-negative |
| cg24264578 | 16 | 3405902  | OR2C1         | 2 | EGFR and pan-negative |
| cg24333473 | 16 | 3493428  | ZNF597        | 2 | EGFR and pan-negative |
| cg06529761 | 16 | 3702486  | DNASE1        | 2 | EGFR and pan-negative |
| cg03264209 | 16 | 3931885  | 0             | 2 | EGFR and pan-negative |
| cg03945800 | 16 | 4165515  | ADCY9         | 2 | EGFR and pan-negative |
| cg15195353 | 16 | 4382775  | GLIS2         | 2 | EGFR and pan-negative |
| cg14951292 | 16 | 4525986  | HMOX2         | 2 | EGFR and pan-negative |
| cg23460697 | 16 | 4902898  | UBN1          | 2 | EGFR and pan-negative |
| cg03586879 | 16 | 6068831  | RBFOX1        | 2 | EGFR and pan-negative |
| cg19378133 | 16 | 6068835  | RBFOX1        | 2 | EGFR and pan-negative |
| cg05988645 | 16 | 8715306  | METTL22       | 2 | EGFR and pan-negative |
| cg00011459 | 16 | 8890425  | TMEM186       | 2 | EGFR and pan-negative |
| cg04007936 | 16 | 8954017  | CARHSP1       | 2 | EGFR and pan-negative |
| cg12529801 | 16 | 9184705  | C16orf72      | 2 | EGFR and pan-negative |
| cg25047001 | 16 | 10277017 | GRIN2A        | 2 | EGFR and pan-negative |
| cg01722994 | 16 | 10277317 | GRIN2A        | 2 | EGFR and pan-negative |
| cg23514672 | 16 | 10788644 | TEKT5         | 2 | EGFR and pan-negative |
| cg26239233 | 16 | 10970801 | CIITA         | 2 | EGFR and pan-negative |
| cg27425675 | 16 | 11035733 | DEXI          | 2 | EGFR and pan-negative |
| cg12268344 | 16 | 11374723 | PRM1          | 2 | EGFR and pan-negative |
| cg24075743 | 16 | 11375385 | PRM1          | 2 | EGFR and pan-negative |
| cg26521448 | 16 | 11876426 | ZC3H7A        | 2 | EGFR and pan-negative |
| cg10240083 | 16 | 12608382 | SNX29         | 2 | EGFR and pan-negative |
| cg08349806 | 16 | 15489904 | MPV17L        | 2 | EGFR and pan-negative |
| cg26713220 | 16 | 15528565 | C16orf45      | 2 | EGFR and pan-negative |
| cg17880199 | 16 | 15950840 | MYH11         | 2 | EGFR and pan-negative |
| cg19467928 | 16 | 16317435 | ABCC6         | 2 | EGFR and pan-negative |
| cg21608192 | 16 | 17563827 | XYLT1         | 2 | EGFR and pan-negative |
| cg09485593 | 16 | 17566099 | XYLT1         | 2 | EGFR and pan-negative |
| cg24492022 | 16 | 18802110 | RPS15A        | 2 | EGFR and pan-negative |
| cg11879577 | 16 | 18813519 | ARL6IP1       | 2 | EGFR and pan-negative |
| cg12699145 | 16 | 18995637 | TMC7          | 2 | EGFR and pan-negative |
| cg16616769 | 16 | 19727142 | IQCK          | 2 | EGFR and pan-negative |
| cg21615663 | 16 | 19727911 | IQCK          | 2 | EGFR and pan-negative |
| cg12554476 | 16 | 20338808 | GP2           | 2 | EGFR and pan-negative |
| cg19238840 | 16 | 20339175 | GP2           | 2 | EGFR and pan-negative |
| cg07456201 | 16 | 20363711 | UMOD          | 2 | EGFR and pan-negative |
| cg17812431 | 16 | 20364284 | UMOD          | 2 | EGFR and pan-negative |
| cg04491443 | 16 | 20415966 | PDILT         | 2 | EGFR and pan-negative |
| cg11297236 | 16 | 20416475 | PDILT         | 2 | EGFR and pan-negative |
| cg04428453 | 16 | 20420652 | ACSM5         | 2 | EGFR and pan-negative |
| cg26825755 | 16 | 20587568 | ACSM2B        | 2 | EGFR and pan-negative |
| cg16940935 | 16 | 20702428 | ACSM1         | 2 | EGFR and pan-negative |
| cg26399035 | 16 | 20753649 | THUMPD1       | 2 | EGFR and pan-negative |
| cg21644826 | 16 | 20775352 | ACSM3         | 2 | EGFR and pan-negative |
| cg26240939 | 16 | 20913414 | LYRM1         | 2 | EGFR and pan-negative |
| cg22152192 | 16 | 21315153 | CRYM          | 2 | EGFR and pan-negative |
| cg19593572 | 16 | 22308486 | POLR3E        | 2 | EGFR and pan-negative |
| cg00925717 | 16 | 23313148 | SCNN1B        | 2 | EGFR and pan-negative |
| cg23113963 | 16 | 23313293 | SCNN1B        | 2 | EGFR and pan-negative |
| cg06240124 | 16 | 23690079 | PLK1          | 2 | EGFR and pan-negative |
| cg15309006 | 16 | 23766116 | CHP2          | 2 | EGFR and pan-negative |
| cg24250393 | 16 | 23846838 | PRKCB         | 2 | EGFR and pan-negative |
| cg04721098 | 16 | 24265703 | CACNG3        | 2 | EGFR and pan-negative |
| cg03945021 | 16 | 24682074 | 0             | 2 | EGFR and pan-negative |
| cg14289511 | 16 | 24682446 | 0             | 2 | EGFR and pan-negative |
| cg02656594 | 16 | 27412496 | IL21R         | 2 | EGFR and pan-negative |
| cg02805028 | 16 | 27899239 | GSGL          | 2 | EGFR and pan-negative |
| cg05590982 | 16 | 28550171 | NUPR1         | 2 | EGFR and pan-negative |
| cg15149645 | 16 | 28550619 | NUPR1         | 2 | EGFR and pan-negative |
| cg26962295 | 16 | 28961797 | NFATC2IP      | 2 | EGFR and pan-negative |
| cg11115702 | 16 | 28986698 | SPNS1         | 2 | EGFR and pan-negative |
| cg24235633 | 16 | 29875177 | CDIPT-AS1     | 2 | EGFR and pan-negative |
| cg20401945 | 16 | 29912460 | ASPHD1        | 2 | EGFR and pan-negative |
| cg16152813 | 16 | 30042407 | FAM57B        | 2 | EGFR and pan-negative |
| cg21742836 | 16 | 30086175 | PPP4C         | 2 | EGFR and pan-negative |
| cg15415545 | 16 | 30206046 | SLX1A-SULT1A3 | 2 | EGFR and pan-negative |
| cg19450025 | 16 | 30206073 | SLX1B-SULT1A4 | 2 | EGFR and pan-negative |
| cg11919694 | 16 | 30380600 | TBC1D10B      | 2 | EGFR and pan-negative |
| cg16014085 | 16 | 30406122 | ZNF48         | 2 | EGFR and pan-negative |
| cg19464252 | 16 | 30675233 | FBR5          | 2 | EGFR and pan-negative |
| cg03766965 | 16 | 30718443 | SRCAP         | 2 | EGFR and pan-negative |
| cg22305782 | 16 | 30937214 | FBXL19        | 2 | EGFR and pan-negative |
| cg10917602 | 16 | 30996630 | HSD3B7        | 2 | EGFR and pan-negative |
| cg26134665 | 16 | 31021544 | STX1B         | 2 | EGFR and pan-negative |
| cg25033993 | 16 | 31022372 | STX1B         | 2 | EGFR and pan-negative |
| cg13974531 | 16 | 31228444 | PYDC1         | 2 | EGFR and pan-negative |
| cg26233914 | 16 | 31366536 | ITGAX         | 2 | EGFR and pan-negative |
| cg13726463 | 16 | 31439681 | COX6A2        | 2 | EGFR and pan-negative |
| cg24110063 | 16 | 31439752 | COX6A2        | 2 | EGFR and pan-negative |
| cg14387505 | 16 | 31538946 | AHSP          | 2 | EGFR and pan-negative |
| cg21096591 | 16 | 32265019 | TP53TG3D      | 2 | EGFR and pan-negative |
| cg18587271 | 16 | 46917496 | GPT2          | 2 | EGFR and pan-negative |
| cg08446111 | 16 | 48279428 | LONP2         | 2 | EGFR and pan-negative |
| cg15869642 | 16 | 49326109 | 0             | 2 | EGFR and pan-negative |
| cg24217877 | 16 | 49378579 | 0             | 2 | EGFR and pan-negative |
| cg07804582 | 16 | 49407186 | C16orf78      | 2 | EGFR and pan-negative |

|            |    |          |                 |   |                       |
|------------|----|----------|-----------------|---|-----------------------|
| cg24642468 | 16 | 49407997 | <i>C16orf78</i> | 2 | EGFR and pan-negative |
| cg23580000 | 16 | 50322156 | <i>ADCY7</i>    | 2 | EGFR and pan-negative |
| cg27081230 | 16 | 50715529 | <i>SNX20</i>    | 2 | EGFR and pan-negative |
| cg22674717 | 16 | 51185394 | <i>SALL1</i>    | 2 | EGFR and pan-negative |
| cg17745122 | 16 | 54320230 | <i>IRX3</i>     | 2 | EGFR and pan-negative |
| cg24662961 | 16 | 54320670 | <i>IRX3</i>     | 2 | EGFR and pan-negative |
| cg05362516 | 16 | 54965089 | <i>IRX5</i>     | 2 | EGFR and pan-negative |
| cg12317456 | 16 | 55512868 | <i>MMP2</i>     | 2 | EGFR and pan-negative |
| cg14400118 | 16 | 55513191 | <i>MMP2</i>     | 2 | EGFR and pan-negative |
| cg09425611 | 16 | 55868370 | <i>CES1</i>     | 2 | EGFR and pan-negative |
| cg21530453 | 16 | 56226346 | <i>GNAO1</i>    | 2 | EGFR and pan-negative |
| cg02552572 | 16 | 56597746 | <i>MT4</i>      | 2 | EGFR and pan-negative |
| cg01015871 | 16 | 56599188 | <i>MT4</i>      | 2 | EGFR and pan-negative |
| cg16158681 | 16 | 56623109 | <i>MT3</i>      | 2 | EGFR and pan-negative |
| cg22655224 | 16 | 56623448 | <i>MT3</i>      | 2 | EGFR and pan-negative |
| cg15134649 | 16 | 56659336 | <i>MT1E</i>     | 2 | EGFR and pan-negative |
| cg20083730 | 16 | 56659724 | <i>MT1E</i>     | 2 | EGFR and pan-negative |
| cg09137696 | 16 | 56672415 | <i>MT1A</i>     | 2 | EGFR and pan-negative |
| cg22198623 | 16 | 56701868 | <i>MT1G</i>     | 2 | EGFR and pan-negative |
| cg09985279 | 16 | 56702134 | <i>MT1G</i>     | 2 | EGFR and pan-negative |
| cg10014293 | 16 | 56703833 | <i>MT1H</i>     | 2 | EGFR and pan-negative |
| cg10586756 | 16 | 56782283 | <i>NUP93</i>    | 2 | EGFR and pan-negative |
| cg17625032 | 16 | 57054740 | <i>NLRC5</i>    | 2 | EGFR and pan-negative |
| cg05700681 | 16 | 57392764 | <i>CCL22</i>    | 2 | EGFR and pan-negative |
| cg19546781 | 16 | 57438715 | <i>CCL17</i>    | 2 | EGFR and pan-negative |
| cg04001668 | 16 | 57654347 | <i>GPR56</i>    | 2 | EGFR and pan-negative |
| cg08368934 | 16 | 57701455 | <i>GPR97</i>    | 2 | EGFR and pan-negative |
| cg09212468 | 16 | 57728632 | <i>CCDC135</i>  | 2 | EGFR and pan-negative |
| cg15153383 | 16 | 57770620 | <i>KATNB1</i>   | 2 | EGFR and pan-negative |
| cg10624445 | 16 | 58006124 | <i>CNGB1</i>    | 2 | EGFR and pan-negative |
| cg13156121 | 16 | 58010114 | <i>TEPP</i>     | 2 | EGFR and pan-negative |
| cg26293512 | 16 | 58010433 | <i>TEPP</i>     | 2 | EGFR and pan-negative |
| cg15272690 | 16 | 58284024 | <i>CCDC113</i>  | 2 | EGFR and pan-negative |
| cg00687686 | 16 | 58497236 | <i>NDRG4</i>    | 2 | EGFR and pan-negative |
| cg13883681 | 16 | 58768565 | <i>GOT2</i>     | 2 | EGFR and pan-negative |
| cg27444994 | 16 | 62070072 | <i>CDH8</i>     | 2 | EGFR and pan-negative |
| cg12163490 | 16 | 65155841 | <i>CDH11</i>    | 2 | EGFR and pan-negative |
| cg10065825 | 16 | 65157050 | <i>CDH11</i>    | 2 | EGFR and pan-negative |
| cg22319147 | 16 | 66400599 | <i>CDH5</i>     | 2 | EGFR and pan-negative |
| cg13813391 | 16 | 66613407 | <i>CMTM2</i>    | 2 | EGFR and pan-negative |
| cg18693704 | 16 | 66731313 | <i>CMTM4</i>    | 2 | EGFR and pan-negative |
| cg11258532 | 16 | 66877873 | <i>CA7</i>      | 2 | EGFR and pan-negative |
| cg16303453 | 16 | 66879016 | <i>CA7</i>      | 2 | EGFR and pan-negative |
| cg19428417 | 16 | 66959729 | <i>RRAD</i>     | 2 | EGFR and pan-negative |
| cg26538442 | 16 | 66994947 | <i>CES3</i>     | 2 | EGFR and pan-negative |
| cg09407859 | 16 | 66995461 | <i>CES3</i>     | 2 | EGFR and pan-negative |
| cg06621126 | 16 | 67198243 | <i>HSF4</i>     | 2 | EGFR and pan-negative |
| cg21142272 | 16 | 67224341 | <i>EXOC3L1</i>  | 2 | EGFR and pan-negative |
| cg25341653 | 16 | 67233277 | <i>ELMO3</i>    | 2 | EGFR and pan-negative |
| cg13067215 | 16 | 67427285 | <i>TPPP3</i>    | 2 | EGFR and pan-negative |
| cg18107072 | 16 | 67427811 | <i>TPPP3</i>    | 2 | EGFR and pan-negative |
| cg11657615 | 16 | 67449861 | <i>ZDHHC1</i>   | 2 | EGFR and pan-negative |
| cg15426734 | 16 | 67695272 | <i>PARD6A</i>   | 2 | EGFR and pan-negative |
| cg13798289 | 16 | 67875619 | <i>THAP11</i>   | 2 | EGFR and pan-negative |
| cg26924825 | 16 | 67977865 | <i>LCAT</i>     | 2 | EGFR and pan-negative |
| cg23401756 | 16 | 68013981 | <i>DPEP3</i>    | 2 | EGFR and pan-negative |
| cg04774694 | 16 | 68033270 | <i>DPEP2</i>    | 2 | EGFR and pan-negative |
| cg10922280 | 16 | 68034227 | <i>DPEP2</i>    | 2 | EGFR and pan-negative |
| cg09144422 | 16 | 68056595 | <i>DUS2L</i>    | 2 | EGFR and pan-negative |
| cg21509097 | 16 | 68279613 | <i>PLA2G15</i>  | 2 | EGFR and pan-negative |
| cg22116290 | 16 | 68481968 | <i>SMPD3</i>    | 2 | EGFR and pan-negative |
| cg11255163 | 16 | 68771200 | <i>CDH1</i>     | 2 | EGFR and pan-negative |
| cg23989635 | 16 | 68771203 | <i>CDH1</i>     | 2 | EGFR and pan-negative |
| cg00240312 | 16 | 68771514 | <i>CDH1</i>     | 2 | EGFR and pan-negative |
| cg11403598 | 16 | 69374664 | <i>COG8</i>     | 2 | EGFR and pan-negative |
| cg10708675 | 16 | 69760758 | <i>NQO1</i>     | 2 | EGFR and pan-negative |
| cg07434382 | 16 | 69984372 | <i>CLEC18A</i>  | 2 | EGFR and pan-negative |
| cg17091851 | 16 | 69984939 | <i>CLEC18A</i>  | 2 | EGFR and pan-negative |
| cg09794131 | 16 | 71264658 | <i>HYDIN</i>    | 2 | EGFR and pan-negative |
| cg16893574 | 16 | 71392095 | <i>CALB2</i>    | 2 | EGFR and pan-negative |
| cg22337624 | 16 | 72126421 | <i>TXNL4B</i>   | 2 | EGFR and pan-negative |
| cg10683939 | 16 | 73178242 | <i>C16orf47</i> | 2 | EGFR and pan-negative |
| cg17500962 | 16 | 73178951 | <i>C16orf47</i> | 2 | EGFR and pan-negative |
| cg09787254 | 16 | 74808678 | <i>FA2H</i>     | 2 | EGFR and pan-negative |
| cg03991512 | 16 | 75150456 | <i>LDHD</i>     | 2 | EGFR and pan-negative |
| cg21686987 | 16 | 75252973 | <i>CTRB1</i>    | 2 | EGFR and pan-negative |
| cg12532477 | 16 | 75529504 | <i>CHST6</i>    | 2 | EGFR and pan-negative |
| cg25383242 | 16 | 76343663 | <i>CNTNAP4</i>  | 2 | EGFR and pan-negative |
| cg03238797 | 16 | 77468893 | <i>ADAMTS18</i> | 2 | EGFR and pan-negative |
| cg20807545 | 16 | 77469538 | <i>ADAMTS18</i> | 2 | EGFR and pan-negative |
| cg04365980 | 16 | 78056736 | <i>CLEC3A</i>   | 2 | EGFR and pan-negative |
| cg10358212 | 16 | 81069005 | <i>ATMIN</i>    | 2 | EGFR and pan-negative |
| cg21522797 | 16 | 81806083 | <i>0</i>        | 2 | EGFR and pan-negative |
| cg20373326 | 16 | 82068803 | <i>HSD17B2</i>  | 2 | EGFR and pan-negative |
| cg19807685 | 16 | 82068980 | <i>HSD17B2</i>  | 2 | EGFR and pan-negative |
| cg08977371 | 16 | 82660490 | <i>CDH13</i>    | 2 | EGFR and pan-negative |
| cg00806490 | 16 | 82660873 | <i>CDH13</i>    | 2 | EGFR and pan-negative |
| cg13759328 | 16 | 82661521 | <i>CDH13</i>    | 2 | EGFR and pan-negative |
| cg16777782 | 16 | 82671333 | <i>CDH13</i>    | 2 | EGFR and pan-negative |
| cg19854301 | 16 | 82671450 | <i>CDH13</i>    | 2 | EGFR and pan-negative |
| cg02899772 | 16 | 84002599 | <i>NECAB2</i>   | 2 | EGFR and pan-negative |
| cg26359240 | 16 | 84179959 | <i>DNAAF1</i>   | 2 | EGFR and pan-negative |
| cg17561452 | 16 | 84224707 | <i>ADAD2</i>    | 2 | EGFR and pan-negative |
| cg07595943 | 16 | 84224901 | <i>ADAD2</i>    | 2 | EGFR and pan-negative |
| cg23865698 | 16 | 84327808 | <i>WFDC1</i>    | 2 | EGFR and pan-negative |

|            |    |          |           |   |                       |
|------------|----|----------|-----------|---|-----------------------|
| cg23617760 | 16 | 84681507 | KLHL36    | 2 | EGFR and pan-negative |
| cg01211097 | 16 | 84732969 | USP10     | 2 | EGFR and pan-negative |
| cg07207789 | 16 | 84852909 | CRISPLD2  | 2 | EGFR and pan-negative |
| cg13391235 | 16 | 85316611 | LINC00311 | 2 | EGFR and pan-negative |
| cg24826867 | 16 | 85932853 | IRF8      | 2 | EGFR and pan-negative |
| cg06602857 | 16 | 86542807 | FENDRR    | 2 | EGFR and pan-negative |
| cg25971347 | 16 | 86544339 | FOXF1     | 2 | EGFR and pan-negative |
| cg24063470 | 16 | 86600389 | FOXC2     | 2 | EGFR and pan-negative |
| cg17095797 | 16 | 86612013 | FOXL1     | 2 | EGFR and pan-negative |
| cg06995715 | 16 | 86612590 | FOXL1     | 2 | EGFR and pan-negative |
| cg06330621 | 16 | 87525461 | ZCCHC14   | 2 | EGFR and pan-negative |
| cg10920957 | 16 | 87635473 | JPH3      | 2 | EGFR and pan-negative |
| cg23040064 | 16 | 87635784 | JPH3      | 2 | EGFR and pan-negative |
| cg26907768 | 16 | 87902420 | SLC7A5    | 2 | EGFR and pan-negative |
| cg12408911 | 16 | 87903671 | SLC7A5    | 2 | EGFR and pan-negative |
| cg23606023 | 16 | 89042948 | CBFA2T3   | 2 | EGFR and pan-negative |
| cg13745346 | 16 | 89044523 | CBFA2T3   | 2 | EGFR and pan-negative |
| cg03819692 | 16 | 89225639 | LINC00304 | 2 | EGFR and pan-negative |
| cg26563737 | 16 | 89725269 | SPATA33   | 2 | EGFR and pan-negative |
| cg04155793 | 16 | 89752847 | CDK10     | 2 | EGFR and pan-negative |
| cg12119029 | 16 | 89752879 | CDK10     | 2 | EGFR and pan-negative |
| cg27462160 | 16 | 89768630 | SPATA2L   | 2 | EGFR and pan-negative |
| cg24800887 | 16 | 89883988 | FANCA     | 2 | EGFR and pan-negative |
| cg16504670 | 16 | 90014253 | DEF8      | 2 | EGFR and pan-negative |
| cg16799087 | 16 | 90128361 | PRDM7     | 2 | EGFR and pan-negative |
| cg27562023 | 17 | 201675   | RPH3AL    | 2 | EGFR and pan-negative |
| cg19731122 | 17 | 1396395  | MYO1C     | 2 | EGFR and pan-negative |
| cg11516377 | 17 | 1933153  | DPH1      | 2 | EGFR and pan-negative |
| cg13315690 | 17 | 1944831  | OVCA2     | 2 | EGFR and pan-negative |
| cg02721374 | 17 | 2996177  | OR1D2     | 2 | EGFR and pan-negative |
| cg27622610 | 17 | 3030185  | OR1G1     | 2 | EGFR and pan-negative |
| cg06882926 | 17 | 3031354  | OR1G1     | 2 | EGFR and pan-negative |
| cg16678925 | 17 | 3100972  | OR1A2     | 2 | EGFR and pan-negative |
| cg26232558 | 17 | 3195808  | OR3A1     | 2 | EGFR and pan-negative |
| cg14043602 | 17 | 3301340  | OR1E1     | 2 | EGFR and pan-negative |
| cg16506346 | 17 | 3302176  | OR1E1     | 2 | EGFR and pan-negative |
| cg05674036 | 17 | 3323791  | OR3A3     | 2 | EGFR and pan-negative |
| cg14314889 | 17 | 3336771  | OR1E2     | 2 | EGFR and pan-negative |
| cg22510822 | 17 | 3337427  | OR1E2     | 2 | EGFR and pan-negative |
| cg12485992 | 17 | 3374971  | SPATA22   | 2 | EGFR and pan-negative |
| cg06862644 | 17 | 3375469  | SPATA22   | 2 | EGFR and pan-negative |
| cg13246592 | 17 | 3600461  | P2RX5     | 2 | EGFR and pan-negative |
| cg26697117 | 17 | 3820518  | P2RX1     | 2 | EGFR and pan-negative |
| cg15443822 | 17 | 3867014  | ATP2A3    | 2 | EGFR and pan-negative |
| cg09872233 | 17 | 4544925  | ALOX15    | 2 | EGFR and pan-negative |
| cg15843823 | 17 | 4544964  | ALOX15    | 2 | EGFR and pan-negative |
| cg18056600 | 17 | 4642047  | CXCL16    | 2 | EGFR and pan-negative |
| cg19841506 | 17 | 4642056  | CXCL16    | 2 | EGFR and pan-negative |
| cg08341874 | 17 | 4689655  | VMO1      | 2 | EGFR and pan-negative |
| cg01739167 | 17 | 4806344  | CHRNE     | 2 | EGFR and pan-negative |
| cg04958703 | 17 | 4844722  | RNF167    | 2 | EGFR and pan-negative |
| cg01926595 | 17 | 4851808  | PFN1      | 2 | EGFR and pan-negative |
| cg12815142 | 17 | 4872603  | SPAG7     | 2 | EGFR and pan-negative |
| cg24680602 | 17 | 5026393  | ZNF232    | 2 | EGFR and pan-negative |
| cg12954718 | 17 | 5031366  | USP6      | 2 | EGFR and pan-negative |
| cg08742106 | 17 | 5031982  | USP6      | 2 | EGFR and pan-negative |
| cg16759954 | 17 | 6461153  | ACKR6     | 2 | EGFR and pan-negative |
| cg26623286 | 17 | 6555130  | C17orf100 | 2 | EGFR and pan-negative |
| cg16652063 | 17 | 6616653  | SLC13A5   | 2 | EGFR and pan-negative |
| cg22040627 | 17 | 6617030  | SLC13A5   | 2 | EGFR and pan-negative |
| cg23571857 | 17 | 6658898  | XAF1      | 2 | EGFR and pan-negative |
| cg02613386 | 17 | 6679533  | FBXO39    | 2 | EGFR and pan-negative |
| cg20723355 | 17 | 6679597  | FBXO39    | 2 | EGFR and pan-negative |
| cg13337865 | 17 | 6734991  | TEKT1     | 2 | EGFR and pan-negative |
| cg08946332 | 17 | 6899888  | ALOX12    | 2 | EGFR and pan-negative |
| cg24173049 | 17 | 6939795  | SLC16A13  | 2 | EGFR and pan-negative |
| cg01472101 | 17 | 6983991  | CLEC10A   | 2 | EGFR and pan-negative |
| cg21636577 | 17 | 7121881  | DLG4      | 2 | EGFR and pan-negative |
| cg12228229 | 17 | 7122261  | ACADVL    | 2 | EGFR and pan-negative |
| cg23983449 | 17 | 7146757  | GABARAP   | 2 | EGFR and pan-negative |
| cg00901493 | 17 | 7197375  | YBX2      | 2 | EGFR and pan-negative |
| cg25671438 | 17 | 7240223  | ACAP1     | 2 | EGFR and pan-negative |
| cg15660077 | 17 | 7311620  | NLGN2     | 2 | EGFR and pan-negative |
| cg18884137 | 17 | 7348490  | CHRNA1    | 2 | EGFR and pan-negative |
| cg00031162 | 17 | 7453377  | TNFSF12   | 2 | EGFR and pan-negative |
| cg24928161 | 17 | 7533115  | SHBG      | 2 | EGFR and pan-negative |
| cg11460029 | 17 | 7608747  | EFNB3     | 2 | EGFR and pan-negative |
| cg14918082 | 17 | 7833237  | KCNAB3    | 2 | EGFR and pan-negative |
| cg25465406 | 17 | 7906098  | GUCY2D    | 2 | EGFR and pan-negative |
| cg03742272 | 17 | 7990705  | ALOX12B   | 2 | EGFR and pan-negative |
| cg25827139 | 17 | 8128467  | LINC00324 | 2 | EGFR and pan-negative |
| cg19537511 | 17 | 8213813  | ARHGEF15  | 2 | EGFR and pan-negative |
| cg14069619 | 17 | 8275273  | KRBA2     | 2 | EGFR and pan-negative |
| cg04720358 | 17 | 9808263  | RCVRN     | 2 | EGFR and pan-negative |
| cg13991233 | 17 | 10102558 | GAS7      | 2 | EGFR and pan-negative |
| cg23400451 | 17 | 10373728 | MYH4      | 2 | EGFR and pan-negative |
| cg00134787 | 17 | 10419499 | MYH1      | 2 | EGFR and pan-negative |
| cg18190433 | 17 | 10573397 | 0         | 2 | EGFR and pan-negative |
| cg12478185 | 17 | 10602001 | ADPRM     | 2 | EGFR and pan-negative |
| cg25174591 | 17 | 11501557 | DNAH9     | 2 | EGFR and pan-negative |
| cg21665000 | 17 | 12569135 | MYOCD     | 2 | EGFR and pan-negative |
| cg18236079 | 17 | 13505590 | HS3ST3A1  | 2 | EGFR and pan-negative |
| cg08343834 | 17 | 15168658 | PMP22     | 2 | EGFR and pan-negative |
| cg26898336 | 17 | 15244519 | TEKT3     | 2 | EGFR and pan-negative |
| cg09429185 | 17 | 15603481 | ZNF286A   | 2 | EGFR and pan-negative |

|            |    |          |                    |   |                       |
|------------|----|----------|--------------------|---|-----------------------|
| cg23838531 | 17 | 15902837 | <i>TTC19</i>       | 2 | EGFR and pan-negative |
| cg24443925 | 17 | 16118806 | <i>NCOR1</i>       | 2 | EGFR and pan-negative |
| cg18152830 | 17 | 16875129 | <i>TNFRSF13B</i>   | 2 | EGFR and pan-negative |
| cg23274244 | 17 | 16875951 | <i>TNFRSF13B</i>   | 2 | EGFR and pan-negative |
| cg02889982 | 17 | 16946247 | <i>MPRIIP</i>      | 2 | EGFR and pan-negative |
| cg13823791 | 17 | 17184990 | <i>COPS3</i>       | 2 | EGFR and pan-negative |
| cg18804206 | 17 | 18162315 | <i>FLII</i>        | 2 | EGFR and pan-negative |
| cg19553721 | 17 | 18429951 | <i>FAM106A</i>     | 2 | EGFR and pan-negative |
| cg21279865 | 17 | 18430908 | <i>FAM106A</i>     | 2 | EGFR and pan-negative |
| cg10762615 | 17 | 18647327 | <i>FBXW10</i>      | 2 | EGFR and pan-negative |
| cg05127924 | 17 | 18647524 | <i>FBXW10</i>      | 2 | EGFR and pan-negative |
| cg05492503 | 17 | 19140765 | <i>EPN2</i>        | 2 | EGFR and pan-negative |
| cg02629257 | 17 | 19271627 | <i>B9D1</i>        | 2 | EGFR and pan-negative |
| cg13030582 | 17 | 19290708 | <i>MFAP4</i>       | 2 | EGFR and pan-negative |
| cg15014549 | 17 | 19437003 | <i>SLC47A1</i>     | 2 | EGFR and pan-negative |
| cg22552966 | 17 | 19620595 | <i>SLC47A2</i>     | 2 | EGFR and pan-negative |
| cg12324629 | 17 | 19771548 | <i>ULK2</i>        | 2 | EGFR and pan-negative |
| cg18881501 | 17 | 21187376 | <i>MAP2K3</i>      | 2 | EGFR and pan-negative |
| cg22642718 | 17 | 21318837 | <i>KCNJ18</i>      | 2 | EGFR and pan-negative |
| cg05246522 | 17 | 25798973 | <i>KSR1</i>        | 2 | EGFR and pan-negative |
| cg14237152 | 17 | 25957777 | <i>LGALS9</i>      | 2 | EGFR and pan-negative |
| cg07150830 | 17 | 26127542 | <i>NOS2</i>        | 2 | EGFR and pan-negative |
| cg04483754 | 17 | 26128980 | <i>NOS2</i>        | 2 | EGFR and pan-negative |
| cg23887396 | 17 | 26699551 | <i>SARM1</i>       | 2 | EGFR and pan-negative |
| cg11653858 | 17 | 26799289 | <i>SLC13A2</i>     | 2 | EGFR and pan-negative |
| cg10213812 | 17 | 26850322 | <i>FOXN1</i>       | 2 | EGFR and pan-negative |
| cg06367117 | 17 | 26903928 | <i>ALDOC</i>       | 2 | EGFR and pan-negative |
| cg08062469 | 17 | 26926627 | <i>SPAG5-AS1</i>   | 2 | EGFR and pan-negative |
| cg22686523 | 17 | 26940926 | <i>SGK494</i>      | 2 | EGFR and pan-negative |
| cg19462352 | 17 | 27038664 | <i>PROCA1</i>      | 2 | EGFR and pan-negative |
| cg21237418 | 17 | 27045043 | <i>RAB34</i>       | 2 | EGFR and pan-negative |
| cg06144905 | 17 | 27369780 | <i>PIPOX</i>       | 2 | EGFR and pan-negative |
| cg06038133 | 17 | 27944585 | <i>CORO6</i>       | 2 | EGFR and pan-negative |
| cg04764624 | 17 | 29718129 | <i>RAB11FIP4</i>   | 2 | EGFR and pan-negative |
| cg10149836 | 17 | 29719312 | <i>RAB11FIP4</i>   | 2 | EGFR and pan-negative |
| cg11161417 | 17 | 31319454 | <i>SPACA3</i>      | 2 | EGFR and pan-negative |
| cg21109025 | 17 | 32580869 | <i>CCL2</i>        | 2 | EGFR and pan-negative |
| cg08124722 | 17 | 32597714 | <i>CCL7</i>        | 2 | EGFR and pan-negative |
| cg24870391 | 17 | 32612675 | <i>CCL11</i>       | 2 | EGFR and pan-negative |
| cg02706575 | 17 | 32683054 | <i>CCL13</i>       | 2 | EGFR and pan-negative |
| cg20556988 | 17 | 32690127 | <i>CCL1</i>        | 2 | EGFR and pan-negative |
| cg06557358 | 17 | 32907002 | <i>C17orf102</i>   | 2 | EGFR and pan-negative |
| cg18338311 | 17 | 32907939 | <i>TMEM132E</i>    | 2 | EGFR and pan-negative |
| cg10801369 | 17 | 33417179 | <i>RFLL</i>        | 2 | EGFR and pan-negative |
| cg02927346 | 17 | 34059260 | <i>RASL10B</i>     | 2 | EGFR and pan-negative |
| cg10016608 | 17 | 34079665 | <i>GAS2L2</i>      | 2 | EGFR and pan-negative |
| cg10315334 | 17 | 34207332 | <i>CCL5</i>        | 2 | EGFR and pan-negative |
| cg06481786 | 17 | 34257936 | <i>RDM1</i>        | 2 | EGFR and pan-negative |
| cg10190509 | 17 | 34308137 | <i>CCL16</i>       | 2 | EGFR and pan-negative |
| cg05766474 | 17 | 34308668 | <i>CCL16</i>       | 2 | EGFR and pan-negative |
| cg07881407 | 17 | 34313744 | <i>CCL14</i>       | 2 | EGFR and pan-negative |
| cg26548883 | 17 | 34329899 | <i>CCL15-CCL14</i> | 2 | EGFR and pan-negative |
| cg08214029 | 17 | 34391478 | <i>CCL18</i>       | 2 | EGFR and pan-negative |
| cg22518733 | 17 | 34417575 | <i>CCL3</i>        | 2 | EGFR and pan-negative |
| cg20657421 | 17 | 34430518 | <i>CCL4</i>        | 2 | EGFR and pan-negative |
| cg14532417 | 17 | 34503322 | <i>TBC1D3B</i>     | 2 | EGFR and pan-negative |
| cg11207564 | 17 | 34523735 | <i>CCL3L3</i>      | 2 | EGFR and pan-negative |
| cg02601403 | 17 | 34592053 | <i>TBC1D3C</i>     | 2 | EGFR and pan-negative |
| cg00896220 | 17 | 34639327 | <i>CCL4L2</i>      | 2 | EGFR and pan-negative |
| cg07747970 | 17 | 35293719 | <i>LHX1</i>        | 2 | EGFR and pan-negative |
| cg11857445 | 17 | 35305905 | <i>AATF</i>        | 2 | EGFR and pan-negative |
| cg23580945 | 17 | 37186341 | <i>LRRC37A11P</i>  | 2 | EGFR and pan-negative |
| cg24724583 | 17 | 37307313 | <i>PLXDC1</i>      | 2 | EGFR and pan-negative |
| cg20089715 | 17 | 37354769 | <i>CACNB1</i>      | 2 | EGFR and pan-negative |
| cg17471928 | 17 | 37381830 | <i>STAC2</i>       | 2 | EGFR and pan-negative |
| cg21309147 | 17 | 37382234 | <i>STAC2</i>       | 2 | EGFR and pan-negative |
| cg11634198 | 17 | 37764158 | <i>NEUROD2</i>     | 2 | EGFR and pan-negative |
| cg01293647 | 17 | 37764264 | <i>NEUROD2</i>     | 2 | EGFR and pan-negative |
| cg11896923 | 17 | 37825027 | <i>PNMT</i>        | 2 | EGFR and pan-negative |
| cg26111030 | 17 | 37856378 | <i>ERBB2</i>       | 2 | EGFR and pan-negative |
| cg16065186 | 17 | 37856663 | <i>ERBB2</i>       | 2 | EGFR and pan-negative |
| cg19895197 | 17 | 37887061 | <i>MIEN1</i>       | 2 | EGFR and pan-negative |
| cg03684977 | 17 | 37893803 | <i>GRB7</i>        | 2 | EGFR and pan-negative |
| cg13878456 | 17 | 38020344 | <i>IKZF3</i>       | 2 | EGFR and pan-negative |
| cg14914852 | 17 | 38024797 | <i>ZBP2</i>        | 2 | EGFR and pan-negative |
| cg10057218 | 17 | 38074149 | <i>GSDMB</i>       | 2 | EGFR and pan-negative |
| cg07313155 | 17 | 38218601 | <i>THRA</i>        | 2 | EGFR and pan-negative |
| cg25104511 | 17 | 38333503 | <i>RAPGEFL1</i>    | 2 | EGFR and pan-negative |
| cg08696192 | 17 | 38657310 | <i>TNS4</i>        | 2 | EGFR and pan-negative |
| cg08074477 | 17 | 38657949 | <i>TNS4</i>        | 2 | EGFR and pan-negative |
| cg01289103 | 17 | 38821277 | <i>KRT222</i>      | 2 | EGFR and pan-negative |
| cg23776012 | 17 | 38821403 | <i>KRT222</i>      | 2 | EGFR and pan-negative |
| cg04484789 | 17 | 38928324 | <i>KRT26</i>       | 2 | EGFR and pan-negative |
| cg22392708 | 17 | 39093770 | <i>KRT23</i>       | 2 | EGFR and pan-negative |
| cg06378617 | 17 | 39095141 | <i>KRT23</i>       | 2 | EGFR and pan-negative |
| cg23205633 | 17 | 39334352 | <i>KRTAP4-2</i>    | 2 | EGFR and pan-negative |
| cg02580606 | 17 | 39526726 | <i>KRT33B</i>      | 2 | EGFR and pan-negative |
| cg25545210 | 17 | 39538417 | <i>KRT34</i>       | 2 | EGFR and pan-negative |
| cg21230133 | 17 | 39553520 | <i>KRT31</i>       | 2 | EGFR and pan-negative |
| cg04618528 | 17 | 39645876 | <i>KRT36</i>       | 2 | EGFR and pan-negative |
| cg11462865 | 17 | 39684124 | <i>KRT19</i>       | 2 | EGFR and pan-negative |
| cg10328573 | 17 | 39728221 | <i>KRT9</i>        | 2 | EGFR and pan-negative |
| cg11068096 | 17 | 39742623 | <i>KRT14</i>       | 2 | EGFR and pan-negative |
| cg00214794 | 17 | 39780623 | <i>KRT17</i>       | 2 | EGFR and pan-negative |
| cg21416237 | 17 | 39970091 | <i>FKBP10</i>      | 2 | EGFR and pan-negative |

|            |    |          |             |   |                       |
|------------|----|----------|-------------|---|-----------------------|
| cg18408487 | 17 | 39993262 | NT5C3B      | 2 | EGFR and pan-negative |
| cg05346140 | 17 | 40275057 | HSPB9       | 2 | EGFR and pan-negative |
| cg02968557 | 17 | 40275126 | HSPB9       | 2 | EGFR and pan-negative |
| cg23559331 | 17 | 40332958 | KCNH4       | 2 | EGFR and pan-negative |
| cg13053608 | 17 | 40345673 | GHDC        | 2 | EGFR and pan-negative |
| cg08468689 | 17 | 40346680 | GHDC        | 2 | EGFR and pan-negative |
| cg04745805 | 17 | 40427474 | STAT5B      | 2 | EGFR and pan-negative |
| cg03001305 | 17 | 40439492 | STAT5A      | 2 | EGFR and pan-negative |
| cg14070162 | 17 | 40575582 | PTRF        | 2 | EGFR and pan-negative |
| cg15800421 | 17 | 40834743 | CNTNAP1     | 2 | EGFR and pan-negative |
| cg14436761 | 17 | 40912963 | RAMP2       | 2 | EGFR and pan-negative |
| cg08108311 | 17 | 40932746 | WNK4        | 2 | EGFR and pan-negative |
| cg26709863 | 17 | 40976775 | BECN1       | 2 | EGFR and pan-negative |
| cg19317715 | 17 | 40996578 | AOC2        | 2 | EGFR and pan-negative |
| cg21639401 | 17 | 41050668 | LINC00671   | 2 | EGFR and pan-negative |
| cg06973652 | 17 | 41278622 | NBR2        | 2 | EGFR and pan-negative |
| cg11964474 | 17 | 41278655 | NBR2        | 2 | EGFR and pan-negative |
| cg14256699 | 17 | 41836026 | SOST        | 2 | EGFR and pan-negative |
| cg10065416 | 17 | 41910894 | MPP3        | 2 | EGFR and pan-negative |
| cg13269964 | 17 | 41924577 | CD300LG     | 2 | EGFR and pan-negative |
| cg07112154 | 17 | 41985074 | MPP2        | 2 | EGFR and pan-negative |
| cg20359349 | 17 | 41994531 | FAM215A     | 2 | EGFR and pan-negative |
| cg04879235 | 17 | 42018862 | PPY         | 2 | EGFR and pan-negative |
| cg21358381 | 17 | 42019637 | PPY         | 2 | EGFR and pan-negative |
| cg21486954 | 17 | 42385289 | RUNDC3A     | 2 | EGFR and pan-negative |
| cg13102585 | 17 | 42386208 | RUNDC3A     | 2 | EGFR and pan-negative |
| cg03192551 | 17 | 42403152 | SLC25A39    | 2 | EGFR and pan-negative |
| cg17749520 | 17 | 42466567 | ITGA2B      | 2 | EGFR and pan-negative |
| cg25228126 | 17 | 42635310 | FZD2        | 2 | EGFR and pan-negative |
| cg06374075 | 17 | 42836931 | ADAM11      | 2 | EGFR and pan-negative |
| cg19586576 | 17 | 42906845 | GJC1        | 2 | EGFR and pan-negative |
| cg21944455 | 17 | 42994269 | GFAP        | 2 | EGFR and pan-negative |
| cg13818573 | 17 | 43045372 | C1QL1       | 2 | EGFR and pan-negative |
| cg16772514 | 17 | 43046872 | C1QL1       | 2 | EGFR and pan-negative |
| cg19601328 | 17 | 43368729 | MAP3K14     | 2 | EGFR and pan-negative |
| cg12643877 | 17 | 43502145 | ARHGAP27    | 2 | EGFR and pan-negative |
| cg14154330 | 17 | 43503401 | ARHGAP27    | 2 | EGFR and pan-negative |
| cg08929103 | 17 | 43860355 | CRHR1       | 2 | EGFR and pan-negative |
| cg18020749 | 17 | 44372704 | LRRC37A     | 2 | EGFR and pan-negative |
| cg09610963 | 17 | 44372720 | LRRC37A     | 2 | EGFR and pan-negative |
| cg23422659 | 17 | 44929215 | WNT9B       | 2 | EGFR and pan-negative |
| cg08631151 | 17 | 45056976 | RPRML       | 2 | EGFR and pan-negative |
| cg10910775 | 17 | 45266517 | CDC27       | 2 | EGFR and pan-negative |
| cg26607785 | 17 | 45810424 | TBX21       | 2 | EGFR and pan-negative |
| cg20209009 | 17 | 45811322 | TBX21       | 2 | EGFR and pan-negative |
| cg23452458 | 17 | 45899388 | OSBPL7      | 2 | EGFR and pan-negative |
| cg09911755 | 17 | 45899773 | OSBPL7      | 2 | EGFR and pan-negative |
| cg10878307 | 17 | 46034455 | PRR15L      | 2 | EGFR and pan-negative |
| cg05106502 | 17 | 46506947 | SKAP1       | 2 | EGFR and pan-negative |
| cg12513481 | 17 | 46507830 | SKAP1       | 2 | EGFR and pan-negative |
| cg07823492 | 17 | 46608099 | HOXB1       | 2 | EGFR and pan-negative |
| cg17233506 | 17 | 46608293 | HOXB1       | 2 | EGFR and pan-negative |
| cg09313705 | 17 | 46622491 | HOXB2       | 2 | EGFR and pan-negative |
| cg12910797 | 17 | 46651722 | HOXB3       | 2 | EGFR and pan-negative |
| cg04609859 | 17 | 46655736 | HOXB4       | 2 | EGFR and pan-negative |
| cg16495265 | 17 | 46671010 | HOXB5       | 2 | EGFR and pan-negative |
| cg01405107 | 17 | 46671635 | HOXB5       | 2 | EGFR and pan-negative |
| cg18878432 | 17 | 46683409 | HOXB6       | 2 | EGFR and pan-negative |
| cg25928579 | 17 | 46692534 | HOXB8       | 2 | EGFR and pan-negative |
| cg12370791 | 17 | 46703650 | HOXB9       | 2 | EGFR and pan-negative |
| cg01543654 | 17 | 46800639 | HOXB-AS5    | 2 | EGFR and pan-negative |
| cg21842478 | 17 | 46806046 | HOXB13      | 2 | EGFR and pan-negative |
| cg15786837 | 17 | 46806935 | HOXB13      | 2 | EGFR and pan-negative |
| cg08901867 | 17 | 46871042 | TLL6        | 2 | EGFR and pan-negative |
| cg13877465 | 17 | 47074670 | IGF2BP1     | 2 | EGFR and pan-negative |
| cg06638433 | 17 | 47075175 | IGF2BP1     | 2 | EGFR and pan-negative |
| cg17839611 | 17 | 47286802 | GNGT2       | 2 | EGFR and pan-negative |
| cg21400896 | 17 | 47288569 | GNGT2       | 2 | EGFR and pan-negative |
| cg07826255 | 17 | 48243707 | SGCA        | 2 | EGFR and pan-negative |
| cg01593886 | 17 | 48278778 | COL1A1      | 2 | EGFR and pan-negative |
| cg01234133 | 17 | 48279072 | COL1A1      | 2 | EGFR and pan-negative |
| cg25949363 | 17 | 48352008 | TMEM92      | 2 | EGFR and pan-negative |
| cg05105913 | 17 | 48422990 | XYLT2       | 2 | EGFR and pan-negative |
| cg23430664 | 17 | 48423021 | XYLT2       | 2 | EGFR and pan-negative |
| cg06958829 | 17 | 48546118 | CHAD        | 2 | EGFR and pan-negative |
| cg16413777 | 17 | 48555933 | RSAD1       | 2 | EGFR and pan-negative |
| cg02593766 | 17 | 48608677 | EPN3        | 2 | EGFR and pan-negative |
| cg11262815 | 17 | 48638703 | CACNA1G     | 2 | EGFR and pan-negative |
| cg18454685 | 17 | 48639239 | CACNA1G-AS1 | 2 | EGFR and pan-negative |
| cg27426707 | 17 | 48639585 | CACNA1G-AS1 | 2 | EGFR and pan-negative |
| cg18490846 | 17 | 48845722 | LINC00483   | 2 | EGFR and pan-negative |
| cg07168556 | 17 | 48912483 | WFIKKN2     | 2 | EGFR and pan-negative |
| cg25670376 | 17 | 49295249 | MBTD1       | 2 | EGFR and pan-negative |
| cg16950616 | 17 | 53045046 | COX11       | 2 | EGFR and pan-negative |
| cg04219321 | 17 | 53341659 | HLF         | 2 | EGFR and pan-negative |
| cg15835232 | 17 | 53343075 | HLF         | 2 | EGFR and pan-negative |
| cg14861570 | 17 | 53499954 | MMD         | 2 | EGFR and pan-negative |
| cg19403377 | 17 | 53800225 | TMEM100     | 2 | EGFR and pan-negative |
| cg05421673 | 17 | 54671575 | NOG         | 2 | EGFR and pan-negative |
| cg01344452 | 17 | 54912143 | DGKE        | 2 | EGFR and pan-negative |
| cg07115820 | 17 | 56270249 | EPX         | 2 | EGFR and pan-negative |
| cg12032049 | 17 | 56314779 | LPO         | 2 | EGFR and pan-negative |
| cg04988978 | 17 | 56359578 | MPO         | 2 | EGFR and pan-negative |
| cg12937434 | 17 | 56405948 | BZRAP1      | 2 | EGFR and pan-negative |
| cg16220183 | 17 | 56609687 | 42617       | 2 | EGFR and pan-negative |

|            |    |          |            |   |                       |
|------------|----|----------|------------|---|-----------------------|
| cg19208681 | 17 | 56769628 | TEX14      | 2 | EGFR and pan-negative |
| cg02318535 | 17 | 56832804 | PPM1E      | 2 | EGFR and pan-negative |
| cg04532952 | 17 | 58227745 | CA4        | 2 | EGFR and pan-negative |
| cg12163132 | 17 | 59475917 | TBX2       | 2 | EGFR and pan-negative |
| cg13274713 | 17 | 59477286 | TBX2       | 2 | EGFR and pan-negative |
| cg17894008 | 17 | 59668604 | NACA2      | 2 | EGFR and pan-negative |
| cg27513764 | 17 | 60457961 | EFCAB3     | 2 | EGFR and pan-negative |
| cg14204735 | 17 | 61524304 | CYB561     | 2 | EGFR and pan-negative |
| cg02131967 | 17 | 61554106 | ACE        | 2 | EGFR and pan-negative |
| cg20099806 | 17 | 61849988 | CCDC47     | 2 | EGFR and pan-negative |
| cg20131968 | 17 | 61850012 | CCDC47     | 2 | EGFR and pan-negative |
| cg10840864 | 17 | 61903314 | PSMC5      | 2 | EGFR and pan-negative |
| cg07117700 | 17 | 61903327 | PSMC5      | 2 | EGFR and pan-negative |
| cg09585781 | 17 | 61951136 | CSH2       | 2 | EGFR and pan-negative |
| cg05131835 | 17 | 61959145 | GH2        | 2 | EGFR and pan-negative |
| cg10207917 | 17 | 61997029 | GH1        | 2 | EGFR and pan-negative |
| cg13694749 | 17 | 62050038 | SCN4A      | 2 | EGFR and pan-negative |
| cg23722792 | 17 | 62050468 | SCN4A      | 2 | EGFR and pan-negative |
| cg18312782 | 17 | 62341028 | TEX2       | 2 | EGFR and pan-negative |
| cg25629694 | 17 | 62657497 | SMURF2     | 2 | EGFR and pan-negative |
| cg15595739 | 17 | 63183451 | RGS9       | 2 | EGFR and pan-negative |
| cg05511685 | 17 | 63184288 | RGS9       | 2 | EGFR and pan-negative |
| cg17095279 | 17 | 64225346 | APOH       | 2 | EGFR and pan-negative |
| cg06226384 | 17 | 64873351 | CACNG5     | 2 | EGFR and pan-negative |
| cg22495124 | 17 | 64873528 | CACNG5     | 2 | EGFR and pan-negative |
| cg26743024 | 17 | 64960282 | CACNG4     | 2 | EGFR and pan-negative |
| cg09892203 | 17 | 64961140 | CACNG4     | 2 | EGFR and pan-negative |
| cg13591701 | 17 | 66597007 | FAM20A     | 2 | EGFR and pan-negative |
| cg26960719 | 17 | 68071302 | KCNJ16     | 2 | EGFR and pan-negative |
| cg19042062 | 17 | 68164784 | KCNJ2-AS1  | 2 | EGFR and pan-negative |
| cg25724441 | 17 | 68165759 | KCNJ2      | 2 | EGFR and pan-negative |
| cg21547708 | 17 | 71161160 | SSTR2      | 2 | EGFR and pan-negative |
| cg25985778 | 17 | 72199373 | RPL38      | 2 | EGFR and pan-negative |
| cg03803009 | 17 | 72363634 | GPR142     | 2 | EGFR and pan-negative |
| cg22377428 | 17 | 72363882 | GPR142     | 2 | EGFR and pan-negative |
| cg07789083 | 17 | 72427563 | GPRC5C     | 2 | EGFR and pan-negative |
| cg23953396 | 17 | 72427941 | GPRC5C     | 2 | EGFR and pan-negative |
| cg10523494 | 17 | 72528386 | CD300LB    | 2 | EGFR and pan-negative |
| cg17677397 | 17 | 72543519 | CD300C     | 2 | EGFR and pan-negative |
| cg04995095 | 17 | 72619556 | CD300E     | 2 | EGFR and pan-negative |
| cg22325823 | 17 | 72667062 | RAB37      | 2 | EGFR and pan-negative |
| cg21640749 | 17 | 72709731 | CD300LF    | 2 | EGFR and pan-negative |
| cg09169283 | 17 | 72856452 | GRIN2C     | 2 | EGFR and pan-negative |
| cg06353318 | 17 | 72920378 | OTOP2      | 2 | EGFR and pan-negative |
| cg00638514 | 17 | 72932048 | OTOP3      | 2 | EGFR and pan-negative |
| cg26612644 | 17 | 73041885 | ATP5H      | 2 | EGFR and pan-negative |
| cg27619475 | 17 | 73083881 | SLC16A5    | 2 | EGFR and pan-negative |
| cg10520594 | 17 | 73127197 | NT5C       | 2 | EGFR and pan-negative |
| cg21391660 | 17 | 73522123 | LLGL2      | 2 | EGFR and pan-negative |
| cg15238200 | 17 | 73893634 | TRIM65     | 2 | EGFR and pan-negative |
| cg16017492 | 17 | 74022575 | EVPL       | 2 | EGFR and pan-negative |
| cg10247252 | 17 | 74071168 | GALR2      | 2 | EGFR and pan-negative |
| cg26545162 | 17 | 74075092 | ZACN       | 2 | EGFR and pan-negative |
| cg17040807 | 17 | 74533282 | CYGB       | 2 | EGFR and pan-negative |
| cg21301440 | 17 | 74534550 | CYGB       | 2 | EGFR and pan-negative |
| cg15503752 | 17 | 74639731 | ST6GALNAC1 | 2 | EGFR and pan-negative |
| cg19935424 | 17 | 74706305 | MXRA7      | 2 | EGFR and pan-negative |
| cg26815021 | 17 | 74733172 | SRSF2      | 2 | EGFR and pan-negative |
| cg00654814 | 17 | 74865068 | MGAT5B     | 2 | EGFR and pan-negative |
| cg16301617 | 17 | 76128906 | TMC6       | 2 | EGFR and pan-negative |
| cg15555014 | 17 | 76164144 | SYNGR2     | 2 | EGFR and pan-negative |
| cg23753610 | 17 | 76567830 | DNAH17     | 2 | EGFR and pan-negative |
| cg14870271 | 17 | 76976010 | LGALS3BP   | 2 | EGFR and pan-negative |
| cg08349573 | 17 | 77020243 | C1QTNF1    | 2 | EGFR and pan-negative |
| cg24844534 | 17 | 77020267 | C1QTNF1    | 2 | EGFR and pan-negative |
| cg25975818 | 17 | 77704298 | ENPP7      | 2 | EGFR and pan-negative |
| cg17348429 | 17 | 77705081 | ENPP7      | 2 | EGFR and pan-negative |
| cg22892904 | 17 | 77751089 | CBX2       | 2 | EGFR and pan-negative |
| cg14893129 | 17 | 78152051 | CARD14     | 2 | EGFR and pan-negative |
| cg05187322 | 17 | 78152328 | CARD14     | 2 | EGFR and pan-negative |
| cg07675682 | 17 | 78195515 | SLC26A11   | 2 | EGFR and pan-negative |
| cg17775235 | 17 | 78450855 | NPTX1      | 2 | EGFR and pan-negative |
| cg05292376 | 17 | 79095236 | AATK       | 2 | EGFR and pan-negative |
| cg13781408 | 17 | 79095700 | AATK       | 2 | EGFR and pan-negative |
| cg07845392 | 17 | 79678158 | SLC25A10   | 2 | EGFR and pan-negative |
| cg21770145 | 17 | 79869997 | PCYT2      | 2 | EGFR and pan-negative |
| cg19202384 | 17 | 79894511 | PYCR1      | 2 | EGFR and pan-negative |
| cg02473123 | 17 | 80274776 | CD7        | 2 | EGFR and pan-negative |
| cg02787991 | 17 | 80291405 | SECTM1     | 2 | EGFR and pan-negative |
| cg10634115 | 17 | 80330743 | UTS2R      | 2 | EGFR and pan-negative |
| cg24200059 | 17 | 80375975 | HEXDC      | 2 | EGFR and pan-negative |
| cg08040471 | 17 | 80407779 | C17orf62   | 2 | EGFR and pan-negative |
| cg14688272 | 17 | 80673958 | FN3KRP     | 2 | EGFR and pan-negative |
| cg04587829 | 17 | 80692947 | FN3K       | 2 | EGFR and pan-negative |
| cg21697134 | 17 | 80693839 | FN3K       | 2 | EGFR and pan-negative |
| cg26738010 | 18 | 580188   | CETN1      | 2 | EGFR and pan-negative |
| cg06490951 | 18 | 580435   | CETN1      | 2 | EGFR and pan-negative |
| cg06284244 | 18 | 813059   | YES1       | 2 | EGFR and pan-negative |
| cg07376535 | 18 | 905450   | ADCYAP1    | 2 | EGFR and pan-negative |
| cg26393983 | 18 | 2571747  | NDC80      | 2 | EGFR and pan-negative |
| cg14133708 | 18 | 2846834  | EMILIN2    | 2 | EGFR and pan-negative |
| cg09009111 | 18 | 2847309  | EMILIN2    | 2 | EGFR and pan-negative |
| cg12067287 | 18 | 3221598  | MYOM1      | 2 | EGFR and pan-negative |
| cg21351102 | 18 | 3247294  | MYL12A     | 2 | EGFR and pan-negative |
| cg13224710 | 18 | 3411743  | TGIF1      | 2 | EGFR and pan-negative |

|            |    |          |                   |   |                       |
|------------|----|----------|-------------------|---|-----------------------|
| cg16128363 | 18 | 3880558  | <i>DLGAP1-AS3</i> | 2 | EGFR and pan-negative |
| cg00027083 | 18 | 5543801  | <i>EPB41L3</i>    | 2 | EGFR and pan-negative |
| cg14950072 | 18 | 7118122  | <i>LAMA1</i>      | 2 | EGFR and pan-negative |
| cg05104081 | 18 | 8717011  | <i>SOGA2</i>      | 2 | EGFR and pan-negative |
| cg07955887 | 18 | 8717926  | <i>SOGA2</i>      | 2 | EGFR and pan-negative |
| cg17982102 | 18 | 9707896  | <i>RAB31</i>      | 2 | EGFR and pan-negative |
| cg05547500 | 18 | 9885809  | <i>TXNDC2</i>     | 2 | EGFR and pan-negative |
| cg19264571 | 18 | 10454085 | <i>APCDD1</i>     | 2 | EGFR and pan-negative |
| cg03426225 | 18 | 10697032 | <i>PIEZO2</i>     | 2 | EGFR and pan-negative |
| cg21165219 | 18 | 10698044 | <i>PIEZO2</i>     | 2 | EGFR and pan-negative |
| cg19883905 | 18 | 12254024 | <i>CIDEA</i>      | 2 | EGFR and pan-negative |
| cg20950011 | 18 | 12254377 | <i>CIDEA</i>      | 2 | EGFR and pan-negative |
| cg03766998 | 18 | 12378044 | <i>AFG3L2</i>     | 2 | EGFR and pan-negative |
| cg18106189 | 18 | 13218595 | <i>LDLRAD4</i>    | 2 | EGFR and pan-negative |
| cg04633384 | 18 | 13218816 | <i>LDLRAD4</i>    | 2 | EGFR and pan-negative |
| cg12853521 | 18 | 13824359 | <i>MC5R</i>       | 2 | EGFR and pan-negative |
| cg11564670 | 18 | 13915006 | <i>MC2R</i>       | 2 | EGFR and pan-negative |
| cg26212229 | 18 | 19191611 | <i>SNRPD1</i>     | 2 | EGFR and pan-negative |
| cg02847216 | 18 | 19997803 | <i>CTAGE1</i>     | 2 | EGFR and pan-negative |
| cg22757447 | 18 | 22006316 | <i>IMPACT</i>     | 2 | EGFR and pan-negative |
| cg10539808 | 18 | 24220737 | <i>KCTD1</i>      | 2 | EGFR and pan-negative |
| cg22679003 | 18 | 25756510 | <i>CDH2</i>       | 2 | EGFR and pan-negative |
| cg09313439 | 18 | 25757211 | <i>CDH2</i>       | 2 | EGFR and pan-negative |
| cg15439862 | 18 | 28622593 | <i>DSC3</i>       | 2 | EGFR and pan-negative |
| cg11832722 | 18 | 28623060 | <i>DSC3</i>       | 2 | EGFR and pan-negative |
| cg01337047 | 18 | 28897113 | <i>DSG1</i>       | 2 | EGFR and pan-negative |
| cg22386311 | 18 | 28898907 | <i>DSG1</i>       | 2 | EGFR and pan-negative |
| cg24711914 | 18 | 28956567 | <i>DSG4</i>       | 2 | EGFR and pan-negative |
| cg13445249 | 18 | 28957111 | <i>DSG4</i>       | 2 | EGFR and pan-negative |
| cg08521225 | 18 | 29171977 | <i>TTR</i>        | 2 | EGFR and pan-negative |
| cg07027513 | 18 | 29265840 | <i>B4GALT6</i>    | 2 | EGFR and pan-negative |
| cg01941619 | 18 | 29770081 | <i>MEP1B</i>      | 2 | EGFR and pan-negative |
| cg11393453 | 18 | 30050326 | <i>GAREM</i>      | 2 | EGFR and pan-negative |
| cg05245861 | 18 | 31020511 | <i>CCDC178</i>    | 2 | EGFR and pan-negative |
| cg06722216 | 18 | 31803067 | <i>NOL4</i>       | 2 | EGFR and pan-negative |
| cg18114671 | 18 | 31803836 | <i>NOL4</i>       | 2 | EGFR and pan-negative |
| cg27318281 | 18 | 33078719 | <i>INO80C</i>     | 2 | EGFR and pan-negative |
| cg22039287 | 18 | 40696075 | <i>RIT2</i>       | 2 | EGFR and pan-negative |
| cg12053284 | 18 | 40857256 | <i>SYT4</i>       | 2 | EGFR and pan-negative |
| cg16222762 | 18 | 40857464 | <i>SYT4</i>       | 2 | EGFR and pan-negative |
| cg27378216 | 18 | 42281171 | <i>SETBP1</i>     | 2 | EGFR and pan-negative |
| cg00037763 | 18 | 42281763 | <i>SETBP1</i>     | 2 | EGFR and pan-negative |
| cg22064129 | 18 | 43194482 | <i>SLC14A2</i>    | 2 | EGFR and pan-negative |
| cg17589341 | 18 | 43304079 | <i>SLC14A1</i>    | 2 | EGFR and pan-negative |
| cg26803305 | 18 | 43304452 | <i>SLC14A1</i>    | 2 | EGFR and pan-negative |
| cg20670302 | 18 | 43652172 | <i>PSTPIP2</i>    | 2 | EGFR and pan-negative |
| cg21949781 | 18 | 43652366 | <i>PSTPIP2</i>    | 2 | EGFR and pan-negative |
| cg17903316 | 18 | 44181660 | <i>LOXHD1</i>     | 2 | EGFR and pan-negative |
| cg19751300 | 18 | 44336399 | <i>ST8SIA5</i>    | 2 | EGFR and pan-negative |
| cg23129478 | 18 | 44337922 | <i>ST8SIA5</i>    | 2 | EGFR and pan-negative |
| cg20879768 | 18 | 44562136 | <i>TCEB3B</i>     | 2 | EGFR and pan-negative |
| cg18530324 | 18 | 46064992 | <i>CTIF</i>       | 2 | EGFR and pan-negative |
| cg12875426 | 18 | 46987532 | <i>DYM</i>        | 2 | EGFR and pan-negative |
| cg06883149 | 18 | 47901188 | <i>SKA1</i>       | 2 | EGFR and pan-negative |
| cg18450227 | 18 | 48190637 | <i>MAPK4</i>      | 2 | EGFR and pan-negative |
| cg11911418 | 18 | 48493759 | <i>ELAC1</i>      | 2 | EGFR and pan-negative |
| cg18801691 | 18 | 49866335 | <i>DCC</i>        | 2 | EGFR and pan-negative |
| cg21669679 | 18 | 49866548 | <i>DCC</i>        | 2 | EGFR and pan-negative |
| cg25266232 | 18 | 49867126 | <i>DCC</i>        | 2 | EGFR and pan-negative |
| cg23242898 | 18 | 49867273 | <i>DCC</i>        | 2 | EGFR and pan-negative |
| cg04272086 | 18 | 49867359 | <i>DCC</i>        | 2 | EGFR and pan-negative |
| cg05420896 | 18 | 49867488 | <i>DCC</i>        | 2 | EGFR and pan-negative |
| cg25602457 | 18 | 49868101 | <i>DCC</i>        | 2 | EGFR and pan-negative |
| cg18841634 | 18 | 49868236 | <i>DCC</i>        | 2 | EGFR and pan-negative |
| cg00399483 | 18 | 49868378 | <i>DCC</i>        | 2 | EGFR and pan-negative |
| cg01839464 | 18 | 49868477 | <i>DCC</i>        | 2 | EGFR and pan-negative |
| cg24084891 | 18 | 49868788 | <i>DCC</i>        | 2 | EGFR and pan-negative |
| cg18572014 | 18 | 51038068 | <i>DCC</i>        | 2 | EGFR and pan-negative |
| cg21284731 | 18 | 51038187 | <i>DCC</i>        | 2 | EGFR and pan-negative |
| cg19553463 | 18 | 51038264 | <i>DCC</i>        | 2 | EGFR and pan-negative |
| cg09052983 | 18 | 52495605 | <i>RAB27B</i>     | 2 | EGFR and pan-negative |
| cg07714374 | 18 | 53255577 | <i>TCF4</i>       | 2 | EGFR and pan-negative |
| cg08491964 | 18 | 53255771 | <i>TCF4</i>       | 2 | EGFR and pan-negative |
| cg09879099 | 18 | 55102210 | <i>ONECUT2</i>    | 2 | EGFR and pan-negative |
| cg25979644 | 18 | 55399003 | <i>ATP8B1</i>     | 2 | EGFR and pan-negative |
| cg15783800 | 18 | 56246997 | <i>ALPK2</i>      | 2 | EGFR and pan-negative |
| cg23357981 | 18 | 56887785 | <i>GRP</i>        | 2 | EGFR and pan-negative |
| cg02037013 | 18 | 58039530 | <i>MC4R</i>       | 2 | EGFR and pan-negative |
| cg13365022 | 18 | 58039932 | <i>MC4R</i>       | 2 | EGFR and pan-negative |
| cg18509435 | 18 | 59157879 | <i>CDH20</i>      | 2 | EGFR and pan-negative |
| cg19423014 | 18 | 59560091 | <i>RNF152</i>     | 2 | EGFR and pan-negative |
| cg07980518 | 18 | 59560394 | <i>RNF152</i>     | 2 | EGFR and pan-negative |
| cg07888234 | 18 | 59992252 | <i>TNFRSF11A</i>  | 2 | EGFR and pan-negative |
| cg01765461 | 18 | 59992984 | <i>TNFRSF11A</i>  | 2 | EGFR and pan-negative |
| cg08223235 | 18 | 60903834 | <i>BCL2</i>       | 2 | EGFR and pan-negative |
| cg05927017 | 18 | 60988155 | <i>0</i>          | 2 | EGFR and pan-negative |
| cg24408313 | 18 | 60988465 | <i>0</i>          | 2 | EGFR and pan-negative |
| cg20837735 | 18 | 61144177 | <i>SERPINB5</i>   | 2 | EGFR and pan-negative |
| cg11435943 | 18 | 61222687 | <i>SERPINB12</i>  | 2 | EGFR and pan-negative |
| cg03468463 | 18 | 61223564 | <i>SERPINB12</i>  | 2 | EGFR and pan-negative |
| cg18121684 | 18 | 61254561 | <i>SERPINB13</i>  | 2 | EGFR and pan-negative |
| cg24546942 | 18 | 61310626 | <i>SERPINB4</i>   | 2 | EGFR and pan-negative |
| cg03294557 | 18 | 61312477 | <i>SERPINB4</i>   | 2 | EGFR and pan-negative |
| cg15772361 | 18 | 61328223 | <i>SERPINB3</i>   | 2 | EGFR and pan-negative |
| cg10533434 | 18 | 61329226 | <i>SERPINB3</i>   | 2 | EGFR and pan-negative |

|            |    |          |              |   |                       |
|------------|----|----------|--------------|---|-----------------------|
| cg01568736 | 18 | 61441730 | SERPINB7     | 2 | EGFR and pan-negative |
| cg17251713 | 18 | 61443038 | SERPINB7     | 2 | EGFR and pan-negative |
| cg24691255 | 18 | 61553966 | SERPINB2     | 2 | EGFR and pan-negative |
| cg13943564 | 18 | 61555117 | SERPINB2     | 2 | EGFR and pan-negative |
| cg23696618 | 18 | 61583699 | SERPINB10    | 2 | EGFR and pan-negative |
| cg10054857 | 18 | 61816543 | LINC00305    | 2 | EGFR and pan-negative |
| cg01722450 | 18 | 61816636 | LINC00305    | 2 | EGFR and pan-negative |
| cg04564030 | 18 | 63417392 | CDH7         | 2 | EGFR and pan-negative |
| cg05637351 | 18 | 63417669 | CDH7         | 2 | EGFR and pan-negative |
| cg15081561 | 18 | 66504226 | CCDC102B     | 2 | EGFR and pan-negative |
| cg03686067 | 18 | 66504389 | CCDC102B     | 2 | EGFR and pan-negative |
| cg20768743 | 18 | 67624846 | CD226        | 2 | EGFR and pan-negative |
| cg21902544 | 18 | 70211515 | CBLN2        | 2 | EGFR and pan-negative |
| cg21922574 | 18 | 70535925 | NETO1        | 2 | EGFR and pan-negative |
| cg22920417 | 18 | 74401671 | 0            | 2 | EGFR and pan-negative |
| cg05896682 | 18 | 74964030 | GALR1        | 2 | EGFR and pan-negative |
| cg01589580 | 18 | 77440800 | CTDP1        | 2 | EGFR and pan-negative |
| cg07851192 | 18 | 77624513 | KCNG2        | 2 | EGFR and pan-negative |
| cg17705056 | 18 | 77711560 | PQLC1        | 2 | EGFR and pan-negative |
| cg02955504 | 18 | 77749374 | TXNL4A       | 2 | EGFR and pan-negative |
| cg23922708 | 18 | 78005180 | PARD6G       | 2 | EGFR and pan-negative |
| cg27227797 | 19 | 375831   | THEG         | 2 | EGFR and pan-negative |
| cg14045283 | 19 | 495737   | MADCAM1      | 2 | EGFR and pan-negative |
| cg26525091 | 19 | 496239   | MADCAM1      | 2 | EGFR and pan-negative |
| cg11159299 | 19 | 543432   | GZMM         | 2 | EGFR and pan-negative |
| cg22189019 | 19 | 640346   | FGF22        | 2 | EGFR and pan-negative |
| cg03605761 | 19 | 663973   | RNF126       | 2 | EGFR and pan-negative |
| cg07073964 | 19 | 698371   | 0            | 2 | EGFR and pan-negative |
| cg19955257 | 19 | 699032   | 0            | 2 | EGFR and pan-negative |
| cg19912436 | 19 | 708918   | PALM         | 2 | EGFR and pan-negative |
| cg00174901 | 19 | 709889   | PALM         | 2 | EGFR and pan-negative |
| cg15640375 | 19 | 821565   | LPPR3        | 2 | EGFR and pan-negative |
| cg20684549 | 19 | 822842   | LPPR3        | 2 | EGFR and pan-negative |
| cg00615241 | 19 | 839689   | PRTN3        | 2 | EGFR and pan-negative |
| cg01963696 | 19 | 851650   | ELANE        | 2 | EGFR and pan-negative |
| cg14401897 | 19 | 1174667  | SBNO2        | 2 | EGFR and pan-negative |
| cg00067471 | 19 | 1241377  | ATP5D        | 2 | EGFR and pan-negative |
| cg07294734 | 19 | 1242323  | ATP5D        | 2 | EGFR and pan-negative |
| cg11885098 | 19 | 1285397  | EFNA2        | 2 | EGFR and pan-negative |
| cg10716163 | 19 | 1355910  | MUM1         | 2 | EGFR and pan-negative |
| cg05989054 | 19 | 1402626  | GAMT         | 2 | EGFR and pan-negative |
| cg06341721 | 19 | 1406759  | DAZAP1       | 2 | EGFR and pan-negative |
| cg11722531 | 19 | 1449857  | APC2         | 2 | EGFR and pan-negative |
| cg18133957 | 19 | 1450493  | APC2         | 2 | EGFR and pan-negative |
| cg11170796 | 19 | 1650224  | TCF3         | 2 | EGFR and pan-negative |
| cg26776924 | 19 | 1969666  | CSNK1G2      | 2 | EGFR and pan-negative |
| cg21030400 | 19 | 2052564  | MKNK2        | 2 | EGFR and pan-negative |
| cg22296149 | 19 | 2249330  | AMH          | 2 | EGFR and pan-negative |
| cg16098170 | 19 | 2255848  | JSRP1        | 2 | EGFR and pan-negative |
| cg20973210 | 19 | 2282729  | C19orf35     | 2 | EGFR and pan-negative |
| cg03870261 | 19 | 2428514  | TIMM13       | 2 | EGFR and pan-negative |
| cg17226343 | 19 | 2720776  | DIRAS1       | 2 | EGFR and pan-negative |
| cg22772878 | 19 | 2721800  | DIRAS1       | 2 | EGFR and pan-negative |
| cg26155152 | 19 | 2943999  | ZNF77        | 2 | EGFR and pan-negative |
| cg13960192 | 19 | 3093904  | GNA11        | 2 | EGFR and pan-negative |
| cg12850636 | 19 | 3727602  | TJP3         | 2 | EGFR and pan-negative |
| cg27022827 | 19 | 3728751  | TJP3         | 2 | EGFR and pan-negative |
| cg20366831 | 19 | 3760955  | APBA3        | 2 | EGFR and pan-negative |
| cg00968931 | 19 | 3762178  | MRPL54       | 2 | EGFR and pan-negative |
| cg25058957 | 19 | 3771683  | RAX2         | 2 | EGFR and pan-negative |
| cg09416313 | 19 | 3801727  | MATK         | 2 | EGFR and pan-negative |
| cg13833831 | 19 | 3802558  | MATK         | 2 | EGFR and pan-negative |
| cg03695693 | 19 | 3932959  | NMRK2        | 2 | EGFR and pan-negative |
| cg27601582 | 19 | 3933195  | NMRK2        | 2 | EGFR and pan-negative |
| cg24748945 | 19 | 4123852  | MAP2K2       | 2 | EGFR and pan-negative |
| cg26646370 | 19 | 4279441  | SHD          | 2 | EGFR and pan-negative |
| cg18581445 | 19 | 4280054  | SHD          | 2 | EGFR and pan-negative |
| cg20789620 | 19 | 4304334  | FSD1         | 2 | EGFR and pan-negative |
| cg25902889 | 19 | 4305090  | FSD1         | 2 | EGFR and pan-negative |
| cg21347412 | 19 | 4339217  | STAP2        | 2 | EGFR and pan-negative |
| cg24926276 | 19 | 4539943  | LRG1         | 2 | EGFR and pan-negative |
| cg08837884 | 19 | 4540782  | LRG1         | 2 | EGFR and pan-negative |
| cg10052840 | 19 | 4558119  | SEMA6B       | 2 | EGFR and pan-negative |
| cg07456645 | 19 | 4769146  | MIR7-3HG     | 2 | EGFR and pan-negative |
| cg19646028 | 19 | 4769240  | MIR7-3HG     | 2 | EGFR and pan-negative |
| cg01400401 | 19 | 4769531  | MIR7-3HG     | 2 | EGFR and pan-negative |
| cg27299588 | 19 | 5286082  | PTPRS        | 2 | EGFR and pan-negative |
| cg16483916 | 19 | 5567758  | TINCR        | 2 | EGFR and pan-negative |
| cg09231514 | 19 | 5681323  | C19orf70     | 2 | EGFR and pan-negative |
| cg14333565 | 19 | 5824065  | NRTN         | 2 | EGFR and pan-negative |
| cg00579402 | 19 | 5838999  | FUT6         | 2 | EGFR and pan-negative |
| cg05444024 | 19 | 5841072  | FUT6         | 2 | EGFR and pan-negative |
| cg17471102 | 19 | 5851255  | FUT3         | 2 | EGFR and pan-negative |
| cg09001777 | 19 | 5851504  | FUT3         | 2 | EGFR and pan-negative |
| cg21570818 | 19 | 5870366  | FUT5         | 2 | EGFR and pan-negative |
| cg14737613 | 19 | 5978790  | LOC100128568 | 2 | EGFR and pan-negative |
| cg25221254 | 19 | 6333547  | ACER1        | 2 | EGFR and pan-negative |
| cg13960126 | 19 | 6462999  | CRB3         | 2 | EGFR and pan-negative |
| cg06697251 | 19 | 6501613  | TUBB4A       | 2 | EGFR and pan-negative |
| cg15677294 | 19 | 6502938  | TUBB4A       | 2 | EGFR and pan-negative |
| cg24778383 | 19 | 6590895  | CD70         | 2 | EGFR and pan-negative |
| cg04891836 | 19 | 6670390  | TNFSF14      | 2 | EGFR and pan-negative |
| cg01036779 | 19 | 6768251  | SH2D3A       | 2 | EGFR and pan-negative |
| cg13470920 | 19 | 6772831  | VAV1         | 2 | EGFR and pan-negative |
| cg10670077 | 19 | 7293341  | INSR         | 2 | EGFR and pan-negative |

|            |    |          |             |   |                       |
|------------|----|----------|-------------|---|-----------------------|
| cg27377450 | 19 | 7446301  | 0           | 2 | EGFR and pan-negative |
| cg03668539 | 19 | 7553324  | PEX11G      | 2 | EGFR and pan-negative |
| cg23174481 | 19 | 7562555  | C19orf45    | 2 | EGFR and pan-negative |
| cg20692181 | 19 | 7733174  | RETN        | 2 | EGFR and pan-negative |
| cg01556075 | 19 | 7741454  | C19orf59    | 2 | EGFR and pan-negative |
| cg18732541 | 19 | 7741602  | C19orf59    | 2 | EGFR and pan-negative |
| cg03221619 | 19 | 7767348  | FCER2       | 2 | EGFR and pan-negative |
| cg16626670 | 19 | 7797031  | CLEC4G      | 2 | EGFR and pan-negative |
| cg07608333 | 19 | 7813422  | CD209       | 2 | EGFR and pan-negative |
| cg19357849 | 19 | 8071093  | ELAVL1      | 2 | EGFR and pan-negative |
| cg21274570 | 19 | 8117671  | CCL25       | 2 | EGFR and pan-negative |
| cg14156381 | 19 | 8212675  | FBN3        | 2 | EGFR and pan-negative |
| cg03633120 | 19 | 8387262  | RPS28       | 2 | EGFR and pan-negative |
| cg20587168 | 19 | 8808829  | ACTL9       | 2 | EGFR and pan-negative |
| cg18885299 | 19 | 8952874  | MBD3L1      | 2 | EGFR and pan-negative |
| cg05250458 | 19 | 9473565  | ZNF177      | 2 | EGFR and pan-negative |
| cg17177699 | 19 | 10120594 | COL5A3      | 2 | EGFR and pan-negative |
| cg19430430 | 19 | 10121323 | COL5A3      | 2 | EGFR and pan-negative |
| cg25661884 | 19 | 10124267 | RDH8        | 2 | EGFR and pan-negative |
| cg12593411 | 19 | 10213722 | ANGPTL6     | 2 | EGFR and pan-negative |
| cg12819826 | 19 | 10216676 | PPAN-P2RY11 | 2 | EGFR and pan-negative |
| cg15043801 | 19 | 10305911 | DNMT1       | 2 | EGFR and pan-negative |
| cg03740216 | 19 | 10397561 | ICAM4       | 2 | EGFR and pan-negative |
| cg11195002 | 19 | 10399805 | ICAM5       | 2 | EGFR and pan-negative |
| cg14145194 | 19 | 10450022 | ICAM3       | 2 | EGFR and pan-negative |
| cg01408558 | 19 | 10563212 | PDE4A       | 2 | EGFR and pan-negative |
| cg25416372 | 19 | 10628014 | S1PR5       | 2 | EGFR and pan-negative |
| cg17826679 | 19 | 10736038 | SLC44A2     | 2 | EGFR and pan-negative |
| cg15334028 | 19 | 10829162 | MIR638      | 2 | EGFR and pan-negative |
| cg02815516 | 19 | 11306319 | KANK2       | 2 | EGFR and pan-negative |
| cg21201109 | 19 | 11307090 | KANK2       | 2 | EGFR and pan-negative |
| cg00988256 | 19 | 11406173 | TSPAN16     | 2 | EGFR and pan-negative |
| cg25434223 | 19 | 11591491 | ELAVL3      | 2 | EGFR and pan-negative |
| cg25332298 | 19 | 11592958 | ELAVL3      | 2 | EGFR and pan-negative |
| cg12854483 | 19 | 11649671 | CNN1        | 2 | EGFR and pan-negative |
| cg23760945 | 19 | 11665140 | ELOF1       | 2 | EGFR and pan-negative |
| cg03649060 | 19 | 11665451 | ELOF1       | 2 | EGFR and pan-negative |
| cg11337780 | 19 | 11977718 | ZNF439      | 2 | EGFR and pan-negative |
| cg17892556 | 19 | 12267464 | ZNF625      | 2 | EGFR and pan-negative |
| cg24362016 | 19 | 12406154 | ZNF44       | 2 | EGFR and pan-negative |
| cg13086467 | 19 | 12779373 | WDR83OS     | 2 | EGFR and pan-negative |
| cg05657090 | 19 | 12917086 | RNASEH2A    | 2 | EGFR and pan-negative |
| cg11220060 | 19 | 12997418 | KLF1        | 2 | EGFR and pan-negative |
| cg26136776 | 19 | 12998426 | KLF1        | 2 | EGFR and pan-negative |
| cg23250700 | 19 | 13056068 | RAD23A      | 2 | EGFR and pan-negative |
| cg16854606 | 19 | 13080743 | DAND5       | 2 | EGFR and pan-negative |
| cg15013019 | 19 | 13213451 | LYL1        | 2 | EGFR and pan-negative |
| cg18011401 | 19 | 13617366 | CACNA1A     | 2 | EGFR and pan-negative |
| cg21517055 | 19 | 14016717 | C19orf57    | 2 | EGFR and pan-negative |
| cg03856723 | 19 | 14229466 | PRKACA      | 2 | EGFR and pan-negative |
| cg14528319 | 19 | 14607713 | GIPC1       | 2 | EGFR and pan-negative |
| cg17162271 | 19 | 14640371 | TECR        | 2 | EGFR and pan-negative |
| cg13237829 | 19 | 14640386 | TECR        | 2 | EGFR and pan-negative |
| cg23470272 | 19 | 14640395 | TECR        | 2 | EGFR and pan-negative |
| cg15649193 | 19 | 14640403 | TECR        | 2 | EGFR and pan-negative |
| cg07072643 | 19 | 14785593 | EMR3        | 2 | EGFR and pan-negative |
| cg15552238 | 19 | 14785749 | EMR3        | 2 | EGFR and pan-negative |
| cg00401678 | 19 | 14787227 | EMR3        | 2 | EGFR and pan-negative |
| cg04103514 | 19 | 14889425 | EMR2        | 2 | EGFR and pan-negative |
| cg24992780 | 19 | 14911551 | ORTC1       | 2 | EGFR and pan-negative |
| cg02124291 | 19 | 14939260 | ORTA5       | 2 | EGFR and pan-negative |
| cg06639544 | 19 | 14940319 | ORTA5       | 2 | EGFR and pan-negative |
| cg05112299 | 19 | 14991491 | ORTA17      | 2 | EGFR and pan-negative |
| cg04645174 | 19 | 14993513 | ORTA17      | 2 | EGFR and pan-negative |
| cg19784470 | 19 | 15052011 | ORTC2       | 2 | EGFR and pan-negative |
| cg03544379 | 19 | 15052824 | ORTC2       | 2 | EGFR and pan-negative |
| cg16377872 | 19 | 15084823 | SLC1A6      | 2 | EGFR and pan-negative |
| cg02489552 | 19 | 15121531 | CCDC105     | 2 | EGFR and pan-negative |
| cg09601629 | 19 | 15122224 | CCDC105     | 2 | EGFR and pan-negative |
| cg01999333 | 19 | 15162623 | CASP14      | 2 | EGFR and pan-negative |
| cg03752087 | 19 | 15163470 | CASP14      | 2 | EGFR and pan-negative |
| cg00666746 | 19 | 15217781 | SYDE1       | 2 | EGFR and pan-negative |
| cg04981492 | 19 | 15218713 | SYDE1       | 2 | EGFR and pan-negative |
| cg17498321 | 19 | 15311304 | NOTCH3      | 2 | EGFR and pan-negative |
| cg02533173 | 19 | 15391124 | BRD4        | 2 | EGFR and pan-negative |
| cg08044694 | 19 | 15391927 | BRD4        | 2 | EGFR and pan-negative |
| cg14851685 | 19 | 15618559 | CYP4F22     | 2 | EGFR and pan-negative |
| cg16377880 | 19 | 15751167 | CYP4F3      | 2 | EGFR and pan-negative |
| cg25813714 | 19 | 15782945 | CYP4F12     | 2 | EGFR and pan-negative |
| cg12513379 | 19 | 15838397 | OR10H2      | 2 | EGFR and pan-negative |
| cg24926780 | 19 | 15838895 | OR10H2      | 2 | EGFR and pan-negative |
| cg25843439 | 19 | 15852574 | OR10H3      | 2 | EGFR and pan-negative |
| cg22593486 | 19 | 15918609 | OR10H1      | 2 | EGFR and pan-negative |
| cg24477636 | 19 | 15919005 | OR10H1      | 2 | EGFR and pan-negative |
| cg13656062 | 19 | 16008723 | CYP4F2      | 2 | EGFR and pan-negative |
| cg05358291 | 19 | 16009219 | CYP4F2      | 2 | EGFR and pan-negative |
| cg03190825 | 19 | 16045788 | CYP4F11     | 2 | EGFR and pan-negative |
| cg03621001 | 19 | 16221719 | RAB8A       | 2 | EGFR and pan-negative |
| cg09424896 | 19 | 16284351 | CIB3        | 2 | EGFR and pan-negative |
| cg16345226 | 19 | 16771394 | SMIM7       | 2 | EGFR and pan-negative |
| cg01252496 | 19 | 17326655 | USE1        | 2 | EGFR and pan-negative |
| cg25689649 | 19 | 17336377 | OCEL1       | 2 | EGFR and pan-negative |
| cg21435336 | 19 | 17392852 | ANKLE1      | 2 | EGFR and pan-negative |
| cg16363586 | 19 | 17516329 | BST2        | 2 | EGFR and pan-negative |
| cg16069910 | 19 | 17571528 | NXNL1       | 2 | EGFR and pan-negative |

|            |    |          |                  |   |                       |
|------------|----|----------|------------------|---|-----------------------|
| cg14366490 | 19 | 17571825 | <i>NXNL1</i>     | 2 | EGFR and pan-negative |
| cg23771661 | 19 | 17905332 | <i>B3GNT3</i>    | 2 | EGFR and pan-negative |
| cg03316864 | 19 | 17906309 | <i>B3GNT3</i>    | 2 | EGFR and pan-negative |
| cg01413516 | 19 | 17932328 | <i>INSL3</i>     | 2 | EGFR and pan-negative |
| cg01655355 | 19 | 17982748 | <i>SLC5A5</i>    | 2 | EGFR and pan-negative |
| cg20557202 | 19 | 17982930 | <i>SLC5A5</i>    | 2 | EGFR and pan-negative |
| cg17926869 | 19 | 18046000 | <i>CCDC124</i>   | 2 | EGFR and pan-negative |
| cg13899108 | 19 | 18344322 | <i>PDE4C</i>     | 2 | EGFR and pan-negative |
| cg00420929 | 19 | 18451112 | <i>PGPEP1</i>    | 2 | EGFR and pan-negative |
| cg09374949 | 19 | 18548964 | <i>ISYNA1</i>    | 2 | EGFR and pan-negative |
| cg11102782 | 19 | 18549136 | <i>ISYNA1</i>    | 2 | EGFR and pan-negative |
| cg07379574 | 19 | 18724173 | <i>TMEM59L</i>   | 2 | EGFR and pan-negative |
| cg12558519 | 19 | 18748017 | <i>KLHL26</i>    | 2 | EGFR and pan-negative |
| cg15784332 | 19 | 18902172 | <i>COMP</i>      | 2 | EGFR and pan-negative |
| cg14757492 | 19 | 19029194 | <i>COPE</i>      | 2 | EGFR and pan-negative |
| cg13118849 | 19 | 19327542 | <i>NCAN</i>      | 2 | EGFR and pan-negative |
| cg06952310 | 19 | 19327990 | <i>NCAN</i>      | 2 | EGFR and pan-negative |
| cg03854071 | 19 | 19626428 | <i>TSSK6</i>     | 2 | EGFR and pan-negative |
| cg06899329 | 19 | 19627922 | <i>NDUFA13</i>   | 2 | EGFR and pan-negative |
| cg19996355 | 19 | 19729375 | <i>PBX4</i>      | 2 | EGFR and pan-negative |
| cg23158811 | 19 | 19729732 | <i>PBX4</i>      | 2 | EGFR and pan-negative |
| cg19282452 | 19 | 19855831 | <i>0</i>         | 2 | EGFR and pan-negative |
| cg15690721 | 19 | 21106016 | <i>ZNF85</i>     | 2 | EGFR and pan-negative |
| cg13858139 | 19 | 22019044 | <i>ZNF43</i>     | 2 | EGFR and pan-negative |
| cg07706362 | 19 | 23578365 | <i>ZNF91</i>     | 2 | EGFR and pan-negative |
| cg11262874 | 19 | 23941711 | <i>ZNF681</i>    | 2 | EGFR and pan-negative |
| cg05512099 | 19 | 30155866 | <i>PLEKHF1</i>   | 2 | EGFR and pan-negative |
| cg18680834 | 19 | 30863349 | <i>ZNF536</i>    | 2 | EGFR and pan-negative |
| cg03555203 | 19 | 31770188 | <i>TSHZ3</i>     | 2 | EGFR and pan-negative |
| cg08458170 | 19 | 31770476 | <i>TSHZ3</i>     | 2 | EGFR and pan-negative |
| cg08084415 | 19 | 32836414 | <i>ZNF507</i>    | 2 | EGFR and pan-negative |
| cg05467458 | 19 | 33361032 | <i>SLC7A9</i>    | 2 | EGFR and pan-negative |
| cg10108208 | 19 | 33571252 | <i>GPATCH1</i>   | 2 | EGFR and pan-negative |
| cg26687173 | 19 | 33623091 | <i>WDR88</i>     | 2 | EGFR and pan-negative |
| cg07422345 | 19 | 33793987 | <i>CEBPA-AS1</i> | 2 | EGFR and pan-negative |
| cg06546607 | 19 | 34013019 | <i>PEPD</i>      | 2 | EGFR and pan-negative |
| cg24739326 | 19 | 34175354 | <i>CHST8</i>     | 2 | EGFR and pan-negative |
| cg13959523 | 19 | 34175481 | <i>CHST8</i>     | 2 | EGFR and pan-negative |
| cg10087081 | 19 | 34789667 | <i>KIAA0355</i>  | 2 | EGFR and pan-negative |
| cg20573420 | 19 | 35451129 | <i>ZNF792</i>    | 2 | EGFR and pan-negative |
| cg10617171 | 19 | 35521856 | <i>SCN1B</i>     | 2 | EGFR and pan-negative |
| cg24715735 | 19 | 35531403 | <i>HPN</i>       | 2 | EGFR and pan-negative |
| cg02633817 | 19 | 35606732 | <i>FXYD3</i>     | 2 | EGFR and pan-negative |
| cg00480115 | 19 | 35606877 | <i>FXYD3</i>     | 2 | EGFR and pan-negative |
| cg17682828 | 19 | 35632767 | <i>FXYD7</i>     | 2 | EGFR and pan-negative |
| cg02131995 | 19 | 35772917 | <i>HAMP</i>      | 2 | EGFR and pan-negative |
| cg14535518 | 19 | 35782015 | <i>MAG</i>       | 2 | EGFR and pan-negative |
| cg05055150 | 19 | 35783292 | <i>MAG</i>       | 2 | EGFR and pan-negative |
| cg06090864 | 19 | 35842448 | <i>FFAR1</i>     | 2 | EGFR and pan-negative |
| cg03782727 | 19 | 35842586 | <i>FFAR1</i>     | 2 | EGFR and pan-negative |
| cg21624359 | 19 | 35848801 | <i>FFAR3</i>     | 2 | EGFR and pan-negative |
| cg03548857 | 19 | 35940174 | <i>FFAR2</i>     | 2 | EGFR and pan-negative |
| cg15479752 | 19 | 35940862 | <i>FFAR2</i>     | 2 | EGFR and pan-negative |
| cg05241571 | 19 | 35981224 | <i>KRTDAP</i>    | 2 | EGFR and pan-negative |
| cg10305797 | 19 | 35981677 | <i>KRTDAP</i>    | 2 | EGFR and pan-negative |
| cg27050793 | 19 | 36018925 | <i>SBSN</i>      | 2 | EGFR and pan-negative |
| cg25681177 | 19 | 36024313 | <i>GAPDHS</i>    | 2 | EGFR and pan-negative |
| cg01443452 | 19 | 36024439 | <i>GAPDHS</i>    | 2 | EGFR and pan-negative |
| cg12497692 | 19 | 36203089 | <i>ZBTB32</i>    | 2 | EGFR and pan-negative |
| cg03309967 | 19 | 36235184 | <i>U2AF1L4</i>   | 2 | EGFR and pan-negative |
| cg24673765 | 19 | 36247869 | <i>HSPB6</i>     | 2 | EGFR and pan-negative |
| cg15125472 | 19 | 36248077 | <i>HSPB6</i>     | 2 | EGFR and pan-negative |
| cg27404050 | 19 | 36303880 | <i>PRODH2</i>    | 2 | EGFR and pan-negative |
| cg27039606 | 19 | 36305049 | <i>PRODH2</i>    | 2 | EGFR and pan-negative |
| cg22339278 | 19 | 36347276 | <i>KIRREL2</i>   | 2 | EGFR and pan-negative |
| cg11767711 | 19 | 36358783 | <i>APLP1</i>     | 2 | EGFR and pan-negative |
| cg24091474 | 19 | 36399185 | <i>TYROBP</i>    | 2 | EGFR and pan-negative |
| cg15060813 | 19 | 36428308 | <i>LRFN3</i>     | 2 | EGFR and pan-negative |
| cg18542098 | 19 | 36499326 | <i>SYNE4</i>     | 2 | EGFR and pan-negative |
| cg21550442 | 19 | 36499839 | <i>SYNE4</i>     | 2 | EGFR and pan-negative |
| cg06432655 | 19 | 36523405 | <i>CLIP3</i>     | 2 | EGFR and pan-negative |
| cg02275359 | 19 | 36719719 | <i>ZNF146</i>    | 2 | EGFR and pan-negative |
| cg25886284 | 19 | 36909418 | <i>ZFP82</i>     | 2 | EGFR and pan-negative |
| cg14399656 | 19 | 37179536 | <i>ZNF567</i>    | 2 | EGFR and pan-negative |
| cg12024906 | 19 | 37825679 | <i>HKR1</i>      | 2 | EGFR and pan-negative |
| cg05778847 | 19 | 38746538 | <i>PPP1R14A</i>  | 2 | EGFR and pan-negative |
| cg07665060 | 19 | 38794598 | <i>C19orf33</i>  | 2 | EGFR and pan-negative |
| cg00412772 | 19 | 38794845 | <i>C19orf33</i>  | 2 | EGFR and pan-negative |
| cg26853640 | 19 | 38879673 | <i>GGN</i>       | 2 | EGFR and pan-negative |
| cg15517609 | 19 | 38924045 | <i>RYR1</i>      | 2 | EGFR and pan-negative |
| cg05471297 | 19 | 38924349 | <i>RYR1</i>      | 2 | EGFR and pan-negative |
| cg00233307 | 19 | 39109076 | <i>MAP4K1</i>    | 2 | EGFR and pan-negative |
| cg24712395 | 19 | 39234666 | <i>CAPN12</i>    | 2 | EGFR and pan-negative |
| cg00204262 | 19 | 39323158 | <i>ECH1</i>      | 2 | EGFR and pan-negative |
| cg08820801 | 19 | 39465821 | <i>FBXO17</i>    | 2 | EGFR and pan-negative |
| cg11402505 | 19 | 39523436 | <i>FBXO27</i>    | 2 | EGFR and pan-negative |
| cg10092957 | 19 | 39687079 | <i>NCCRP1</i>    | 2 | EGFR and pan-negative |
| cg11270633 | 19 | 39736956 | <i>IFNL3</i>     | 2 | EGFR and pan-negative |
| cg26589285 | 19 | 39787011 | <i>IFNL1</i>     | 2 | EGFR and pan-negative |
| cg08958913 | 19 | 40193890 | <i>LGALS14</i>   | 2 | EGFR and pan-negative |
| cg01192952 | 19 | 40195142 | <i>LGALS14</i>   | 2 | EGFR and pan-negative |
| cg19103704 | 19 | 40440963 | <i>FCGBP</i>     | 2 | EGFR and pan-negative |
| cg27383956 | 19 | 40732902 | <i>CNTD2</i>     | 2 | EGFR and pan-negative |
| cg24623694 | 19 | 40919760 | <i>PRX</i>       | 2 | EGFR and pan-negative |
| cg08450982 | 19 | 41195910 | <i>NUMBL</i>     | 2 | EGFR and pan-negative |

|            |    |          |          |   |                       |
|------------|----|----------|----------|---|-----------------------|
| cg10322876 | 19 | 41496749 | CYP2B6   | 2 | EGFR and pan-negative |
| cg06210526 | 19 | 41619850 | CYP2F1   | 2 | EGFR and pan-negative |
| cg03940103 | 19 | 41698823 | CYP2S1   | 2 | EGFR and pan-negative |
| cg14892768 | 19 | 41725332 | AXL      | 2 | EGFR and pan-negative |
| cg10237469 | 19 | 42133409 | CEACAM4  | 2 | EGFR and pan-negative |
| cg21505334 | 19 | 42213020 | CEACAM5  | 2 | EGFR and pan-negative |
| cg26813458 | 19 | 42260485 | CEACAM6  | 2 | EGFR and pan-negative |
| cg13322449 | 19 | 42300200 | CEACAM3  | 2 | EGFR and pan-negative |
| cg11584690 | 19 | 42574196 | 0        | 2 | EGFR and pan-negative |
| cg02456292 | 19 | 42817262 | TMEM145  | 2 | EGFR and pan-negative |
| cg06029655 | 19 | 42881132 | MEGF8    | 2 | EGFR and pan-negative |
| cg09018862 | 19 | 42882644 | MEGF8    | 2 | EGFR and pan-negative |
| cg12973651 | 19 | 42894453 | CNFN     | 2 | EGFR and pan-negative |
| cg03003745 | 19 | 42948167 | CXCL17   | 2 | EGFR and pan-negative |
| cg08551633 | 19 | 43099046 | CEACAM8  | 2 | EGFR and pan-negative |
| cg13434203 | 19 | 43244502 | PSG3     | 2 | EGFR and pan-negative |
| cg07745725 | 19 | 43245860 | PSG3     | 2 | EGFR and pan-negative |
| cg25477904 | 19 | 43383405 | PSG1     | 2 | EGFR and pan-negative |
| cg25839766 | 19 | 43385077 | PSG1     | 2 | EGFR and pan-negative |
| cg11151665 | 19 | 43421584 | PSG6     | 2 | EGFR and pan-negative |
| cg17642353 | 19 | 43423265 | PSG6     | 2 | EGFR and pan-negative |
| cg25187533 | 19 | 43586787 | PSG2     | 2 | EGFR and pan-negative |
| cg04127255 | 19 | 43588055 | PSG2     | 2 | EGFR and pan-negative |
| cg15586352 | 19 | 43691143 | PSG5     | 2 | EGFR and pan-negative |
| cg01078689 | 19 | 43691869 | PSG5     | 2 | EGFR and pan-negative |
| cg23264413 | 19 | 43710277 | PSG4     | 2 | EGFR and pan-negative |
| cg19873701 | 19 | 43773649 | PSG9     | 2 | EGFR and pan-negative |
| cg23610820 | 19 | 43774921 | PSG9     | 2 | EGFR and pan-negative |
| cg26251865 | 19 | 44220214 | IRGC     | 2 | EGFR and pan-negative |
| cg04833845 | 19 | 44286076 | KCNN4    | 2 | EGFR and pan-negative |
| cg09030119 | 19 | 44905343 | ZNF285   | 2 | EGFR and pan-negative |
| cg26918645 | 19 | 44905882 | ZNF285   | 2 | EGFR and pan-negative |
| cg22580353 | 19 | 45146900 | PVR      | 2 | EGFR and pan-negative |
| cg13906416 | 19 | 45147440 | PVR      | 2 | EGFR and pan-negative |
| cg20559736 | 19 | 45174671 | CEACAM19 | 2 | EGFR and pan-negative |
| cg03292149 | 19 | 45279765 | CBLC     | 2 | EGFR and pan-negative |
| cg22780475 | 19 | 45281526 | CBLC     | 2 | EGFR and pan-negative |
| cg08319238 | 19 | 45312525 | BCAM     | 2 | EGFR and pan-negative |
| cg27436184 | 19 | 45449006 | APOC2    | 2 | EGFR and pan-negative |
| cg13950558 | 19 | 45683263 | BLOC1S3  | 2 | EGFR and pan-negative |
| cg03213216 | 19 | 46001735 | PPM1N    | 2 | EGFR and pan-negative |
| cg00116838 | 19 | 46001746 | PPM1N    | 2 | EGFR and pan-negative |
| cg16158874 | 19 | 46095562 | GPR4     | 2 | EGFR and pan-negative |
| cg16620032 | 19 | 46097075 | GPR4     | 2 | EGFR and pan-negative |
| cg24254206 | 19 | 46196934 | QPCTL    | 2 | EGFR and pan-negative |
| cg02218324 | 19 | 46318439 | RSPH6A   | 2 | EGFR and pan-negative |
| cg27118825 | 19 | 46318748 | RSPH6A   | 2 | EGFR and pan-negative |
| cg10862535 | 19 | 46526483 | PGLYRP1  | 2 | EGFR and pan-negative |
| cg07022477 | 19 | 46798869 | HIF3A    | 2 | EGFR and pan-negative |
| cg15984661 | 19 | 46916520 | CCDC8    | 2 | EGFR and pan-negative |
| cg17296166 | 19 | 46974567 | PNMAL1   | 2 | EGFR and pan-negative |
| cg11822964 | 19 | 47129337 | PTGIR    | 2 | EGFR and pan-negative |
| cg06454084 | 19 | 47158242 | DACT3    | 2 | EGFR and pan-negative |
| cg14799446 | 19 | 47250607 | STRN4    | 2 | EGFR and pan-negative |
| cg09628601 | 19 | 47523630 | NPAS1    | 2 | EGFR and pan-negative |
| cg02903525 | 19 | 47813489 | C5AR1    | 2 | EGFR and pan-negative |
| cg10451565 | 19 | 47840131 | C5AR2    | 2 | EGFR and pan-negative |
| cg22123464 | 19 | 47974901 | SLC8A2   | 2 | EGFR and pan-negative |
| cg16791686 | 19 | 48249014 | GLTSCR2  | 2 | EGFR and pan-negative |
| cg19404979 | 19 | 48498031 | ELSPBP1  | 2 | EGFR and pan-negative |
| cg09422355 | 19 | 48547158 | CABP5    | 2 | EGFR and pan-negative |
| cg11521325 | 19 | 48808268 | CCDC114  | 2 | EGFR and pan-negative |
| cg01795122 | 19 | 48828859 | EMP3     | 2 | EGFR and pan-negative |
| cg18678185 | 19 | 48895030 | KDELR1   | 2 | EGFR and pan-negative |
| cg11953334 | 19 | 48897863 | GRIN2D   | 2 | EGFR and pan-negative |
| cg19876838 | 19 | 48958664 | KCNJ14   | 2 | EGFR and pan-negative |
| cg10222534 | 19 | 48958894 | KCNJ14   | 2 | EGFR and pan-negative |
| cg15149098 | 19 | 49055027 | SULT2B1  | 2 | EGFR and pan-negative |
| cg00698688 | 19 | 49055432 | SULT2B1  | 2 | EGFR and pan-negative |
| cg00754617 | 19 | 49109288 | SPACA4   | 2 | EGFR and pan-negative |
| cg15475323 | 19 | 49220102 | MAMSTR   | 2 | EGFR and pan-negative |
| cg27256309 | 19 | 49220485 | MAMSTR   | 2 | EGFR and pan-negative |
| cg23082877 | 19 | 49243427 | RASIP1   | 2 | EGFR and pan-negative |
| cg26750002 | 19 | 49244674 | RASIP1   | 2 | EGFR and pan-negative |
| cg14719352 | 19 | 49258131 | FUT1     | 2 | EGFR and pan-negative |
| cg17264470 | 19 | 49260285 | FGF21    | 2 | EGFR and pan-negative |
| cg21252483 | 19 | 49399788 | TULP2    | 2 | EGFR and pan-negative |
| cg18971671 | 19 | 49401721 | TULP2    | 2 | EGFR and pan-negative |
| cg00062776 | 19 | 49402424 | TULP2    | 2 | EGFR and pan-negative |
| cg14833160 | 19 | 49457855 | BAX      | 2 | EGFR and pan-negative |
| cg11177404 | 19 | 49535079 | SNAR-G2  | 2 | EGFR and pan-negative |
| cg26450866 | 19 | 49576241 | KCNA7    | 2 | EGFR and pan-negative |
| cg10910525 | 19 | 49658232 | HRC      | 2 | EGFR and pan-negative |
| cg10037005 | 19 | 49838478 | CD37     | 2 | EGFR and pan-negative |
| cg15046675 | 19 | 49838777 | CD37     | 2 | EGFR and pan-negative |
| cg07549194 | 19 | 49927076 | PTH2     | 2 | EGFR and pan-negative |
| cg03138668 | 19 | 49944488 | SLC17A7  | 2 | EGFR and pan-negative |
| cg15528736 | 19 | 50015780 | FCGRT    | 2 | EGFR and pan-negative |
| cg05696092 | 19 | 50084283 | PRRG2    | 2 | EGFR and pan-negative |
| cg20727114 | 19 | 50194120 | CPT1C    | 2 | EGFR and pan-negative |
| cg21604803 | 19 | 50194662 | CPT1C    | 2 | EGFR and pan-negative |
| cg08711674 | 19 | 50381878 | AKT1S1   | 2 | EGFR and pan-negative |
| cg23878206 | 19 | 50431425 | ATF5     | 2 | EGFR and pan-negative |
| cg04315771 | 19 | 50433949 | NUP62    | 2 | EGFR and pan-negative |
| cg03283694 | 19 | 50464713 | SIGLEC11 | 2 | EGFR and pan-negative |

|            |    |          |          |   |                       |
|------------|----|----------|----------|---|-----------------------|
| cg24311282 | 19 | 50464887 | SIGLEC11 | 2 | EGFR and pan-negative |
| cg09697795 | 19 | 50666379 | IZUMO2   | 2 | EGFR and pan-negative |
| cg01857260 | 19 | 50666552 | IZUMO2   | 2 | EGFR and pan-negative |
| cg27285056 | 19 | 50868879 | NAPSA    | 2 | EGFR and pan-negative |
| cg03763616 | 19 | 50921997 | SPIB     | 2 | EGFR and pan-negative |
| cg22268231 | 19 | 50922484 | SPIB     | 2 | EGFR and pan-negative |
| cg13521229 | 19 | 51013630 | JOSD2    | 2 | EGFR and pan-negative |
| cg19017177 | 19 | 51141227 | SYT3     | 2 | EGFR and pan-negative |
| cg12289045 | 19 | 51141361 | SYT3     | 2 | EGFR and pan-negative |
| cg24824840 | 19 | 51219975 | SHANK1   | 2 | EGFR and pan-negative |
| cg11801011 | 19 | 51220537 | SHANK1   | 2 | EGFR and pan-negative |
| cg20308817 | 19 | 51225848 | CLEC11A  | 2 | EGFR and pan-negative |
| cg13152535 | 19 | 51226557 | CLEC11A  | 2 | EGFR and pan-negative |
| cg12970081 | 19 | 51273924 | GPR32    | 2 | EGFR and pan-negative |
| cg15782391 | 19 | 51293367 | ACPT     | 2 | EGFR and pan-negative |
| cg26415633 | 19 | 51327356 | KLK1     | 2 | EGFR and pan-negative |
| cg26149550 | 19 | 51334496 | KLK15    | 2 | EGFR and pan-negative |
| cg16742703 | 19 | 51357857 | KLK3     | 2 | EGFR and pan-negative |
| cg17687962 | 19 | 51358244 | KLK3     | 2 | EGFR and pan-negative |
| cg07947016 | 19 | 51375893 | KLK2     | 2 | EGFR and pan-negative |
| cg15096123 | 19 | 51413937 | KLK4     | 2 | EGFR and pan-negative |
| cg04349727 | 19 | 51457389 | KLK5     | 2 | EGFR and pan-negative |
| cg19953406 | 19 | 51487360 | KLK7     | 2 | EGFR and pan-negative |
| cg17031773 | 19 | 51513611 | KLK9     | 2 | EGFR and pan-negative |
| cg01144251 | 19 | 51514146 | KLK9     | 2 | EGFR and pan-negative |
| cg11846956 | 19 | 51520382 | KLK10    | 2 | EGFR and pan-negative |
| cg13343486 | 19 | 51520533 | KLK10    | 2 | EGFR and pan-negative |
| cg11459714 | 19 | 51520658 | KLK10    | 2 | EGFR and pan-negative |
| cg08818784 | 19 | 51522198 | KLK10    | 2 | EGFR and pan-negative |
| cg24512400 | 19 | 51522561 | KLK10    | 2 | EGFR and pan-negative |
| cg15910208 | 19 | 51522588 | KLK10    | 2 | EGFR and pan-negative |
| cg11170179 | 19 | 51522767 | KLK10    | 2 | EGFR and pan-negative |
| cg06130787 | 19 | 51523550 | KLK10    | 2 | EGFR and pan-negative |
| cg26524263 | 19 | 51568336 | KLK13    | 2 | EGFR and pan-negative |
| cg04164824 | 19 | 51628196 | SIGLEC9  | 2 | EGFR and pan-negative |
| cg23458892 | 19 | 51645979 | SIGLEC7  | 2 | EGFR and pan-negative |
| cg11122968 | 19 | 51727295 | CD33     | 2 | EGFR and pan-negative |
| cg10129493 | 19 | 51728586 | CD33     | 2 | EGFR and pan-negative |
| cg10126923 | 19 | 51875451 | NKG7     | 2 | EGFR and pan-negative |
| cg12491710 | 19 | 51891526 | LIM2     | 2 | EGFR and pan-negative |
| cg12530021 | 19 | 52004630 | SIGLEC12 | 2 | EGFR and pan-negative |
| cg18986165 | 19 | 52005990 | SIGLEC12 | 2 | EGFR and pan-negative |
| cg16617137 | 19 | 52036199 | SIGLEC6  | 2 | EGFR and pan-negative |
| cg13300756 | 19 | 52228038 | HAS1     | 2 | EGFR and pan-negative |
| cg14141399 | 19 | 52228048 | HAS1     | 2 | EGFR and pan-negative |
| cg15811427 | 19 | 52254222 | FPR1     | 2 | EGFR and pan-negative |
| cg05376954 | 19 | 52255673 | FPR1     | 2 | EGFR and pan-negative |
| cg24964368 | 19 | 52264413 | FPR2     | 2 | EGFR and pan-negative |
| cg06784466 | 19 | 52297968 | FPR3     | 2 | EGFR and pan-negative |
| cg27480700 | 19 | 52800524 | ZNF480   | 2 | EGFR and pan-negative |
| cg07703337 | 19 | 52847943 | ZNF610   | 2 | EGFR and pan-negative |
| cg04386405 | 19 | 53141394 | ZNF83    | 2 | EGFR and pan-negative |
| cg17132967 | 19 | 53142304 | ZNF83    | 2 | EGFR and pan-negative |
| cg07559730 | 19 | 53497048 | ZNF702P  | 2 | EGFR and pan-negative |
| cg10332700 | 19 | 53636077 | ZNF415   | 2 | EGFR and pan-negative |
| cg24892510 | 19 | 53636309 | ZNF415   | 2 | EGFR and pan-negative |
| cg19554294 | 19 | 53761868 | VN1R2    | 2 | EGFR and pan-negative |
| cg24454579 | 19 | 53794794 | BIRC8    | 2 | EGFR and pan-negative |
| cg07042144 | 19 | 54327404 | NLRP12   | 2 | EGFR and pan-negative |
| cg25866075 | 19 | 54327780 | NLRP12   | 2 | EGFR and pan-negative |
| cg05832051 | 19 | 54369469 | MYADM    | 2 | EGFR and pan-negative |
| cg04518808 | 19 | 54384822 | PRKCG    | 2 | EGFR and pan-negative |
| cg26626089 | 19 | 54385865 | PRKCG    | 2 | EGFR and pan-negative |
| cg12315311 | 19 | 54568443 | VSTM1    | 2 | EGFR and pan-negative |
| cg26832879 | 19 | 54620073 | TFPT     | 2 | EGFR and pan-negative |
| cg04632683 | 19 | 54620122 | TFPT     | 2 | EGFR and pan-negative |
| cg25736482 | 19 | 54677232 | TMC4     | 2 | EGFR and pan-negative |
| cg16005443 | 19 | 54727139 | LILRB3   | 2 | EGFR and pan-negative |
| cg08684473 | 19 | 54761090 | LILRB5   | 2 | EGFR and pan-negative |
| cg05248470 | 19 | 54785348 | LILRB2   | 2 | EGFR and pan-negative |
| cg19279346 | 19 | 54785518 | MIR4752  | 2 | EGFR and pan-negative |
| cg00705255 | 19 | 54804613 | LILRA3   | 2 | EGFR and pan-negative |
| cg00727947 | 19 | 54825100 | LILRA5   | 2 | EGFR and pan-negative |
| cg01204985 | 19 | 54849738 | LILRA4   | 2 | EGFR and pan-negative |
| cg01661993 | 19 | 54926966 | TTYH1    | 2 | EGFR and pan-negative |
| cg03620376 | 19 | 54984272 | CDC42EP5 | 2 | EGFR and pan-negative |
| cg09227563 | 19 | 54984705 | CDC42EP5 | 2 | EGFR and pan-negative |
| cg00269932 | 19 | 55013296 | LAIR2    | 2 | EGFR and pan-negative |
| cg04000821 | 19 | 55014066 | LAIR2    | 2 | EGFR and pan-negative |
| cg03602500 | 19 | 55047721 | KIR3DX1  | 2 | EGFR and pan-negative |
| cg25033144 | 19 | 55048290 | KIR3DX1  | 2 | EGFR and pan-negative |
| cg19486673 | 19 | 55085018 | LILRA2   | 2 | EGFR and pan-negative |
| cg25384595 | 19 | 55105156 | LILRA1   | 2 | EGFR and pan-negative |
| cg01720520 | 19 | 55127892 | LILRB1   | 2 | EGFR and pan-negative |
| cg00113020 | 19 | 55173482 | LILRB4   | 2 | EGFR and pan-negative |
| cg05922591 | 19 | 55174624 | LILRB4   | 2 | EGFR and pan-negative |
| cg11237817 | 19 | 55235762 | KIR3DL3  | 2 | EGFR and pan-negative |
| cg22039846 | 19 | 55281253 | KIR2DL1  | 2 | EGFR and pan-negative |
| cg18221897 | 19 | 55282146 | KIR2DL1  | 2 | EGFR and pan-negative |
| cg15627025 | 19 | 55327906 | KIR3DL1  | 2 | EGFR and pan-negative |
| cg24654350 | 19 | 55328867 | KIR3DL1  | 2 | EGFR and pan-negative |
| cg05252264 | 19 | 55385587 | FCAR     | 2 | EGFR and pan-negative |
| cg14550066 | 19 | 55417500 | NCR1     | 2 | EGFR and pan-negative |
| cg14876043 | 19 | 55458730 | NLRP7    | 2 | EGFR and pan-negative |
| cg07189381 | 19 | 55660514 | TNNT1    | 2 | EGFR and pan-negative |

|            |    |          |           |   |                       |
|------------|----|----------|-----------|---|-----------------------|
| cg18838701 | 19 | 55668612 | TNNI3     | 2 | EGFR and pan-negative |
| cg03097995 | 19 | 55669091 | TNNI3     | 2 | EGFR and pan-negative |
| cg20239740 | 19 | 55690495 | SYT5      | 2 | EGFR and pan-negative |
| cg10080004 | 19 | 55691827 | SYT5      | 2 | EGFR and pan-negative |
| cg17749456 | 19 | 55792696 | HSPBP1    | 2 | EGFR and pan-negative |
| cg25443975 | 19 | 55794597 | BRSK1     | 2 | EGFR and pan-negative |
| cg26770281 | 19 | 56109975 | FIZ1      | 2 | EGFR and pan-negative |
| cg26209676 | 19 | 56154382 | ZNF581    | 2 | EGFR and pan-negative |
| cg12582959 | 19 | 56159199 | CCDC106   | 2 | EGFR and pan-negative |
| cg08475088 | 19 | 56249291 | NLRP9     | 2 | EGFR and pan-negative |
| cg03789934 | 19 | 56342665 | NLRP11    | 2 | EGFR and pan-negative |
| cg22190114 | 19 | 56459234 | NLRP8     | 2 | EGFR and pan-negative |
| cg05023116 | 19 | 56510892 | NLRP5     | 2 | EGFR and pan-negative |
| cg26264314 | 19 | 56510965 | NLRP5     | 2 | EGFR and pan-negative |
| cg23850212 | 19 | 57049857 | ZFP28     | 2 | EGFR and pan-negative |
| cg04783231 | 19 | 57050834 | ZFP28     | 2 | EGFR and pan-negative |
| cg06244906 | 19 | 57307081 | ZIM2      | 2 | EGFR and pan-negative |
| cg17663463 | 19 | 57349709 | PEG3      | 2 | EGFR and pan-negative |
| cg27519373 | 19 | 57350292 | PEG3      | 2 | EGFR and pan-negative |
| cg07310951 | 19 | 57350503 | PEG3      | 2 | EGFR and pan-negative |
| cg22354595 | 19 | 57351440 | PEG3      | 2 | EGFR and pan-negative |
| cg19335327 | 19 | 57351642 | PEG3      | 2 | EGFR and pan-negative |
| cg14849423 | 19 | 57351791 | PEG3      | 2 | EGFR and pan-negative |
| cg19098268 | 19 | 57352269 | MIMT1     | 2 | EGFR and pan-negative |
| cg18668753 | 19 | 57352657 | MIMT1     | 2 | EGFR and pan-negative |
| cg16636110 | 19 | 57702479 | ZNF264    | 2 | EGFR and pan-negative |
| cg07054095 | 19 | 58038856 | ZNF549    | 2 | EGFR and pan-negative |
| cg23854009 | 19 | 58111128 | ZNF530    | 2 | EGFR and pan-negative |
| cg08849574 | 19 | 58125953 | ZNF134    | 2 | EGFR and pan-negative |
| cg27276456 | 19 | 58180770 | ZSCAN4    | 2 | EGFR and pan-negative |
| cg19246110 | 19 | 58238928 | ZNF671    | 2 | EGFR and pan-negative |
| cg20176532 | 19 | 58458979 | ZNF256    | 2 | EGFR and pan-negative |
| cg02959669 | 19 | 58459358 | ZNF256    | 2 | EGFR and pan-negative |
| cg02449608 | 19 | 58486600 | C19orf18  | 2 | EGFR and pan-negative |
| cg12259537 | 19 | 58514694 | ZNF606    | 2 | EGFR and pan-negative |
| cg07942995 | 19 | 58546307 | ZSCAN1    | 2 | EGFR and pan-negative |
| cg06243556 | 19 | 58609473 | ZSCAN18   | 2 | EGFR and pan-negative |
| cg18888520 | 19 | 58609806 | ZSCAN18   | 2 | EGFR and pan-negative |
| cg12792011 | 19 | 58661915 | ZNF329    | 2 | EGFR and pan-negative |
| cg00647741 | 19 | 58693450 | ZNF274    | 2 | EGFR and pan-negative |
| cg19776201 | 19 | 58951434 | ZNF132    | 2 | EGFR and pan-negative |
| cg27401095 | 19 | 58977904 | ZNF324    | 2 | EGFR and pan-negative |
| cg00466436 | 20 | 123163   | DEFB126   | 2 | EGFR and pan-negative |
| cg20305726 | 20 | 123613   | DEFB126   | 2 | EGFR and pan-negative |
| cg24116886 | 20 | 137877   | DEFB127   | 2 | EGFR and pan-negative |
| cg02046532 | 20 | 207858   | DEFB129   | 2 | EGFR and pan-negative |
| cg05067973 | 20 | 360745   | TRIB3     | 2 | EGFR and pan-negative |
| cg06143901 | 20 | 591400   | TCF15     | 2 | EGFR and pan-negative |
| cg22100821 | 20 | 656743   | SCRT2     | 2 | EGFR and pan-negative |
| cg01200060 | 20 | 657283   | SCRT2     | 2 | EGFR and pan-negative |
| cg01479232 | 20 | 748992   | SLC52A3   | 2 | EGFR and pan-negative |
| cg26540515 | 20 | 896349   | ANGPT4    | 2 | EGFR and pan-negative |
| cg03218374 | 20 | 896981   | ANGPT4    | 2 | EGFR and pan-negative |
| cg25737664 | 20 | 1538671  | SIRPD     | 2 | EGFR and pan-negative |
| cg17423978 | 20 | 1539641  | SIRPD     | 2 | EGFR and pan-negative |
| cg25799433 | 20 | 1600623  | SIRPB1    | 2 | EGFR and pan-negative |
| cg15722679 | 20 | 1638393  | SIRPG     | 2 | EGFR and pan-negative |
| cg11061975 | 20 | 1639325  | SIRPG     | 2 | EGFR and pan-negative |
| cg18952560 | 20 | 1875040  | SIRPA     | 2 | EGFR and pan-negative |
| cg15057581 | 20 | 1875084  | SIRPA     | 2 | EGFR and pan-negative |
| cg19237753 | 20 | 1876215  | SIRPA     | 2 | EGFR and pan-negative |
| cg11245384 | 20 | 1974646  | PDYN      | 2 | EGFR and pan-negative |
| cg14944362 | 20 | 1974924  | PDYN      | 2 | EGFR and pan-negative |
| cg21611708 | 20 | 2277040  | TGM3      | 2 | EGFR and pan-negative |
| cg23278885 | 20 | 2361431  | TGM6      | 2 | EGFR and pan-negative |
| cg03243506 | 20 | 2517231  | TMC2      | 2 | EGFR and pan-negative |
| cg19290962 | 20 | 2517613  | TMC2      | 2 | EGFR and pan-negative |
| cg06539804 | 20 | 2781489  | CPXM1     | 2 | EGFR and pan-negative |
| cg01265637 | 20 | 2795930  | C20orf141 | 2 | EGFR and pan-negative |
| cg04267184 | 20 | 3023418  | GNRH2     | 2 | EGFR and pan-negative |
| cg26955850 | 20 | 3052345  | OXT       | 2 | EGFR and pan-negative |
| cg22113807 | 20 | 3140865  | UBOX5     | 2 | EGFR and pan-negative |
| cg14089692 | 20 | 3662546  | ADAM33    | 2 | EGFR and pan-negative |
| cg22333888 | 20 | 3663421  | ADAM33    | 2 | EGFR and pan-negative |
| cg02288165 | 20 | 3687992  | SIGLEC1   | 2 | EGFR and pan-negative |
| cg09458237 | 20 | 3712191  | HSPA12B   | 2 | EGFR and pan-negative |
| cg11934695 | 20 | 4230092  | ADRA1D    | 2 | EGFR and pan-negative |
| cg09425898 | 20 | 4721250  | PRNT      | 2 | EGFR and pan-negative |
| cg19614321 | 20 | 4804581  | RASSF2    | 2 | EGFR and pan-negative |
| cg27114120 | 20 | 5296302  | PROKR2    | 2 | EGFR and pan-negative |
| cg15842884 | 20 | 5591925  | GPCPD1    | 2 | EGFR and pan-negative |
| cg07642638 | 20 | 5891786  | CHGB      | 2 | EGFR and pan-negative |
| cg23433607 | 20 | 5892338  | CHGB      | 2 | EGFR and pan-negative |
| cg09539538 | 20 | 6104215  | FERMT1    | 2 | EGFR and pan-negative |
| cg01797527 | 20 | 6749480  | BMP2      | 2 | EGFR and pan-negative |
| cg23657409 | 20 | 8112754  | PLCB1     | 2 | EGFR and pan-negative |
| cg07008386 | 20 | 8113630  | PLCB1     | 2 | EGFR and pan-negative |
| cg24736099 | 20 | 9077730  | PLCB4     | 2 | EGFR and pan-negative |
| cg01144286 | 20 | 9495596  | LAMP5     | 2 | EGFR and pan-negative |
| cg12645220 | 20 | 9819272  | PAK7      | 2 | EGFR and pan-negative |
| cg12388309 | 20 | 9819805  | PAK7      | 2 | EGFR and pan-negative |
| cg16564824 | 20 | 10199536 | SNAP25    | 2 | EGFR and pan-negative |
| cg03473294 | 20 | 13619704 | TASP1     | 2 | EGFR and pan-negative |
| cg26059153 | 20 | 13976190 | MACROD2   | 2 | EGFR and pan-negative |
| cg23751724 | 20 | 13976403 | MACROD2   | 2 | EGFR and pan-negative |

|            |    |          |          |   |                       |
|------------|----|----------|----------|---|-----------------------|
| cg05846716 | 20 | 17208109 | PCSK2    | 2 | EGFR and pan-negative |
| cg03387497 | 20 | 17680945 | BANF2    | 2 | EGFR and pan-negative |
| cg20998885 | 20 | 18794833 | SCP2D1   | 2 | EGFR and pan-negative |
| cg01557989 | 20 | 19192675 | SLC24A3  | 2 | EGFR and pan-negative |
| cg00888479 | 20 | 19193824 | SLC24A3  | 2 | EGFR and pan-negative |
| cg17016000 | 20 | 19869644 | RIN2     | 2 | EGFR and pan-negative |
| cg17029168 | 20 | 21494547 | NKX2-2   | 2 | EGFR and pan-negative |
| cg07572341 | 20 | 22565881 | FOXA2    | 2 | EGFR and pan-negative |
| cg10003443 | 20 | 22567170 | FOXA2    | 2 | EGFR and pan-negative |
| cg17586860 | 20 | 23015906 | SSTR4    | 2 | EGFR and pan-negative |
| cg24562819 | 20 | 23029806 | THBD     | 2 | EGFR and pan-negative |
| cg08244522 | 20 | 23030533 | THBD     | 2 | EGFR and pan-negative |
| cg20171451 | 20 | 23420109 | CSTL1    | 2 | EGFR and pan-negative |
| cg06489008 | 20 | 23433349 | CST11    | 2 | EGFR and pan-negative |
| cg09953122 | 20 | 23471693 | CST8     | 2 | EGFR and pan-negative |
| cg23033024 | 20 | 23472484 | CST8     | 2 | EGFR and pan-negative |
| cg15210427 | 20 | 23548991 | CST9L    | 2 | EGFR and pan-negative |
| cg27655855 | 20 | 23549455 | CST9L    | 2 | EGFR and pan-negative |
| cg24076399 | 20 | 23618348 | CST3     | 2 | EGFR and pan-negative |
| cg24875415 | 20 | 23669470 | CST4     | 2 | EGFR and pan-negative |
| cg25965576 | 20 | 23670089 | CST4     | 2 | EGFR and pan-negative |
| cg08430598 | 20 | 23731367 | CST1     | 2 | EGFR and pan-negative |
| cg10938286 | 20 | 23806999 | CST2     | 2 | EGFR and pan-negative |
| cg02882813 | 20 | 23860078 | CST5     | 2 | EGFR and pan-negative |
| cg15988792 | 20 | 25039314 | ACSS1    | 2 | EGFR and pan-negative |
| cg23097006 | 20 | 25063817 | VSX1     | 2 | EGFR and pan-negative |
| cg20318748 | 20 | 25605178 | NANP     | 2 | EGFR and pan-negative |
| cg21663722 | 20 | 26034952 | FAM182A  | 2 | EGFR and pan-negative |
| cg22954265 | 20 | 29520583 | 0        | 2 | EGFR and pan-negative |
| cg03014957 | 20 | 29956062 | DEFB118  | 2 | EGFR and pan-negative |
| cg18462653 | 20 | 29978176 | DEFB119  | 2 | EGFR and pan-negative |
| cg26063872 | 20 | 30028206 | DEFB123  | 2 | EGFR and pan-negative |
| cg19241311 | 20 | 30028893 | DEFB123  | 2 | EGFR and pan-negative |
| cg26299767 | 20 | 30062987 | REM1     | 2 | EGFR and pan-negative |
| cg12153542 | 20 | 30063129 | REM1     | 2 | EGFR and pan-negative |
| cg18034859 | 20 | 30406688 | MYLK2    | 2 | EGFR and pan-negative |
| cg08623947 | 20 | 30640164 | HCK      | 2 | EGFR and pan-negative |
| cg10968815 | 20 | 31595346 | BPIFB2   | 2 | EGFR and pan-negative |
| cg13696012 | 20 | 31595360 | BPIFB2   | 2 | EGFR and pan-negative |
| cg02309431 | 20 | 31618931 | BPIFB6   | 2 | EGFR and pan-negative |
| cg16483466 | 20 | 31671234 | BPIFB4   | 2 | EGFR and pan-negative |
| cg01671881 | 20 | 31804901 | BPIFA3   | 2 | EGFR and pan-negative |
| cg11846968 | 20 | 31823545 | BPIFA1   | 2 | EGFR and pan-negative |
| cg04405541 | 20 | 31870405 | BPIFB1   | 2 | EGFR and pan-negative |
| cg06335889 | 20 | 32077519 | CBFA2T2  | 2 | EGFR and pan-negative |
| cg16051027 | 20 | 32320358 | ZNF341   | 2 | EGFR and pan-negative |
| cg11920519 | 20 | 33135025 | MAP1LC3A | 2 | EGFR and pan-negative |
| cg13514050 | 20 | 33460585 | GGT7     | 2 | EGFR and pan-negative |
| cg13368786 | 20 | 33463522 | ACSS2    | 2 | EGFR and pan-negative |
| cg11277126 | 20 | 33680945 | TRPC4AP  | 2 | EGFR and pan-negative |
| cg25461934 | 20 | 33759150 | PROCR    | 2 | EGFR and pan-negative |
| cg26806924 | 20 | 33760017 | PROCR    | 2 | EGFR and pan-negative |
| cg07085271 | 20 | 33813815 | MMP24    | 2 | EGFR and pan-negative |
| cg07378350 | 20 | 34027324 | GDF5     | 2 | EGFR and pan-negative |
| cg14963897 | 20 | 34288750 | NFS1     | 2 | EGFR and pan-negative |
| cg08013810 | 20 | 34389239 | PHF20    | 2 | EGFR and pan-negative |
| cg20993403 | 20 | 34700329 | EPB41L1  | 2 | EGFR and pan-negative |
| cg02701137 | 20 | 34994743 | DLGAP4   | 2 | EGFR and pan-negative |
| cg09276978 | 20 | 34995517 | DLGAP4   | 2 | EGFR and pan-negative |
| cg04459030 | 20 | 35885149 | GHRH     | 2 | EGFR and pan-negative |
| cg05498681 | 20 | 35973318 | SRC      | 2 | EGFR and pan-negative |
| cg23566503 | 20 | 36149750 | NNAT     | 2 | EGFR and pan-negative |
| cg10642330 | 20 | 36150061 | NNAT     | 2 | EGFR and pan-negative |
| cg00481227 | 20 | 36322069 | CTNBNB1  | 2 | EGFR and pan-negative |
| cg17974185 | 20 | 36323340 | CTNBNB1  | 2 | EGFR and pan-negative |
| cg11599505 | 20 | 36532096 | VSTM2L   | 2 | EGFR and pan-negative |
| cg17083925 | 20 | 36793373 | TGM2     | 2 | EGFR and pan-negative |
| cg18979491 | 20 | 36974445 | LBP      | 2 | EGFR and pan-negative |
| cg08351331 | 20 | 36975083 | LBP      | 2 | EGFR and pan-negative |
| cg14271690 | 20 | 37209999 | ADIG     | 2 | EGFR and pan-negative |
| cg08535373 | 20 | 37352612 | SLC32A1  | 2 | EGFR and pan-negative |
| cg03556497 | 20 | 37352792 | SLC32A1  | 2 | EGFR and pan-negative |
| cg27377213 | 20 | 37433803 | PPP1R16B | 2 | EGFR and pan-negative |
| cg24834740 | 20 | 37434552 | PPP1R16B | 2 | EGFR and pan-negative |
| cg02497758 | 20 | 39317194 | MAFB     | 2 | EGFR and pan-negative |
| cg22851319 | 20 | 39765363 | PLCG1    | 2 | EGFR and pan-negative |
| cg11668512 | 20 | 39929580 | ZHX3     | 2 | EGFR and pan-negative |
| cg18938204 | 20 | 39994857 | EMILIN3  | 2 | EGFR and pan-negative |
| cg00273068 | 20 | 39995747 | EMILIN3  | 2 | EGFR and pan-negative |
| cg13168820 | 20 | 41818356 | PTPRT    | 2 | EGFR and pan-negative |
| cg04541293 | 20 | 41819125 | PTPRT    | 2 | EGFR and pan-negative |
| cg21685427 | 20 | 42187356 | SGK2     | 2 | EGFR and pan-negative |
| cg17463527 | 20 | 42187837 | SGK2     | 2 | EGFR and pan-negative |
| cg11398517 | 20 | 42355625 | GTSF1L   | 2 | EGFR and pan-negative |
| cg11319389 | 20 | 42544648 | TOX2     | 2 | EGFR and pan-negative |
| cg04369341 | 20 | 42545022 | TOX2     | 2 | EGFR and pan-negative |
| cg04448487 | 20 | 42875777 | GDAP1L1  | 2 | EGFR and pan-negative |
| cg17810944 | 20 | 42876091 | GDAP1L1  | 2 | EGFR and pan-negative |
| cg17692403 | 20 | 42964959 | R3HDM1   | 2 | EGFR and pan-negative |
| cg23834593 | 20 | 42983920 | HNF4A    | 2 | EGFR and pan-negative |
| cg19525717 | 20 | 43160249 | PKIG     | 2 | EGFR and pan-negative |
| cg20622019 | 20 | 43279793 | ADA      | 2 | EGFR and pan-negative |
| cg03562120 | 20 | 43343997 | WISP2    | 2 | EGFR and pan-negative |
| cg19332710 | 20 | 43438865 | RIMS4    | 2 | EGFR and pan-negative |
| cg09628707 | 20 | 43729410 | KCNS1    | 2 | EGFR and pan-negative |

|            |    |          |                |   |                       |
|------------|----|----------|----------------|---|-----------------------|
| cg18241647 | 20 | 43753347 | WFDC12         | 2 | EGFR and pan-negative |
| cg09462575 | 20 | 43803485 | PI3            | 2 | EGFR and pan-negative |
| cg20015689 | 20 | 43835190 | SEMG1          | 2 | EGFR and pan-negative |
| cg04545516 | 20 | 43836061 | SEMG1          | 2 | EGFR and pan-negative |
| cg03312792 | 20 | 43849759 | SEMG2          | 2 | EGFR and pan-negative |
| cg02311163 | 20 | 43850511 | SEMG2          | 2 | EGFR and pan-negative |
| cg20747455 | 20 | 43933383 | MATN4          | 2 | EGFR and pan-negative |
| cg21835643 | 20 | 43935361 | RBPJL          | 2 | EGFR and pan-negative |
| cg16757724 | 20 | 43935528 | RBPJL          | 2 | EGFR and pan-negative |
| cg10876928 | 20 | 43977473 | SDC4           | 2 | EGFR and pan-negative |
| cg12547930 | 20 | 44168753 | WFDC6          | 2 | EGFR and pan-negative |
| cg02605634 | 20 | 44258384 | WFDC10A        | 2 | EGFR and pan-negative |
| cg25133753 | 20 | 44299726 | WFDC11         | 2 | EGFR and pan-negative |
| cg08108953 | 20 | 44329941 | WFDC13         | 2 | EGFR and pan-negative |
| cg00690280 | 20 | 44332733 | WFDC10B        | 2 | EGFR and pan-negative |
| cg22988566 | 20 | 44334869 | WFDC10B        | 2 | EGFR and pan-negative |
| cg02810134 | 20 | 44455922 | TNNC2          | 2 | EGFR and pan-negative |
| cg21023770 | 20 | 44517227 | SPATA25        | 2 | EGFR and pan-negative |
| cg08260891 | 20 | 44518802 | CTSA           | 2 | EGFR and pan-negative |
| cg19067730 | 20 | 44518824 | CTSA           | 2 | EGFR and pan-negative |
| cg26220350 | 20 | 44540621 | PLTP           | 2 | EGFR and pan-negative |
| cg22752533 | 20 | 44657948 | SLC12A5        | 2 | EGFR and pan-negative |
| cg04640913 | 20 | 44880515 | CDH22          | 2 | EGFR and pan-negative |
| cg00576250 | 20 | 45087765 | ZNF663         | 2 | EGFR and pan-negative |
| cg27610561 | 20 | 45337784 | SLC2A10        | 2 | EGFR and pan-negative |
| cg17550582 | 20 | 45338652 | SLC2A10        | 2 | EGFR and pan-negative |
| cg09306675 | 20 | 45523996 | EYA2           | 2 | EGFR and pan-negative |
| cg11979959 | 20 | 46414900 | SULF2          | 2 | EGFR and pan-negative |
| cg22084611 | 20 | 46414934 | SULF2          | 2 | EGFR and pan-negative |
| cg24364574 | 20 | 47443694 | PREX1          | 2 | EGFR and pan-negative |
| cg24507762 | 20 | 48099890 | KCNB1          | 2 | EGFR and pan-negative |
| cg05932408 | 20 | 48184639 | PTGIS          | 2 | EGFR and pan-negative |
| cg02046340 | 20 | 48552742 | RNF114         | 2 | EGFR and pan-negative |
| cg02828104 | 20 | 48770800 | TMEM189-UBE2V1 | 2 | EGFR and pan-negative |
| cg23293787 | 20 | 49576382 | MOCS3          | 2 | EGFR and pan-negative |
| cg02305261 | 20 | 49638967 | KCNG1          | 2 | EGFR and pan-negative |
| cg24924779 | 20 | 49639998 | KCNG1          | 2 | EGFR and pan-negative |
| cg10226546 | 20 | 50158996 | NFATC2         | 2 | EGFR and pan-negative |
| cg06303238 | 20 | 50418959 | SALL4          | 2 | EGFR and pan-negative |
| cg00476577 | 20 | 52200408 | ZNF217         | 2 | EGFR and pan-negative |
| cg18956481 | 20 | 52790139 | CYP24A1        | 2 | EGFR and pan-negative |
| cg09260441 | 20 | 53091739 | DOK5           | 2 | EGFR and pan-negative |
| cg11822659 | 20 | 53092781 | DOK5           | 2 | EGFR and pan-negative |
| cg13588354 | 20 | 54823303 | MC3R           | 2 | EGFR and pan-negative |
| cg19226099 | 20 | 54824085 | MC3R           | 2 | EGFR and pan-negative |
| cg26516759 | 20 | 55840973 | BMP7           | 2 | EGFR and pan-negative |
| cg13888886 | 20 | 55904640 | SPO11          | 2 | EGFR and pan-negative |
| cg14264994 | 20 | 56099548 | CTCF           | 2 | EGFR and pan-negative |
| cg16101800 | 20 | 56136569 | PCK1           | 2 | EGFR and pan-negative |
| cg22772698 | 20 | 56195991 | ZBP1           | 2 | EGFR and pan-negative |
| cg00138126 | 20 | 56286697 | PMEPA1         | 2 | EGFR and pan-negative |
| cg22175764 | 20 | 56803964 | 0              | 2 | EGFR and pan-negative |
| cg26029902 | 20 | 56884425 | PPP4R1L        | 2 | EGFR and pan-negative |
| cg23418591 | 20 | 57090317 | APCDD1L-AS1    | 2 | EGFR and pan-negative |
| cg05558390 | 20 | 57415377 | GNAS           | 2 | EGFR and pan-negative |
| cg24975842 | 20 | 57416221 | GNAS           | 2 | EGFR and pan-negative |
| cg18619398 | 20 | 57416506 | GNAS           | 2 | EGFR and pan-negative |
| cg20674577 | 20 | 58179540 | PHACTR3        | 2 | EGFR and pan-negative |
| cg20357628 | 20 | 58179847 | PHACTR3        | 2 | EGFR and pan-negative |
| cg07347645 | 20 | 58507171 | SYCP2          | 2 | EGFR and pan-negative |
| cg20707333 | 20 | 58514079 | PPP1R3D        | 2 | EGFR and pan-negative |
| cg00400263 | 20 | 58514201 | PPP1R3D        | 2 | EGFR and pan-negative |
| cg20895028 | 20 | 58533443 | CDH26          | 2 | EGFR and pan-negative |
| cg24607535 | 20 | 58533495 | CDH26          | 2 | EGFR and pan-negative |
| cg08833432 | 20 | 60719824 | SS18L1         | 2 | EGFR and pan-negative |
| cg08186362 | 20 | 60794868 | HRH3           | 2 | EGFR and pan-negative |
| cg10605520 | 20 | 60796141 | HRH3           | 2 | EGFR and pan-negative |
| cg24587268 | 20 | 60813121 | OSBPL2         | 2 | EGFR and pan-negative |
| cg11154879 | 20 | 61001775 | RBBP8NL        | 2 | EGFR and pan-negative |
| cg02537838 | 20 | 61002595 | RBBP8NL        | 2 | EGFR and pan-negative |
| cg04132607 | 20 | 61041456 | GATA5          | 2 | EGFR and pan-negative |
| cg20822628 | 20 | 61041592 | GATA5          | 2 | EGFR and pan-negative |
| cg14519000 | 20 | 61041765 | GATA5          | 2 | EGFR and pan-negative |
| cg15749748 | 20 | 61050560 | GATA5          | 2 | EGFR and pan-negative |
| cg03777459 | 20 | 61051802 | GATA5          | 2 | EGFR and pan-negative |
| cg27447740 | 20 | 61148587 | C20orf166-AS1  | 2 | EGFR and pan-negative |
| cg09210315 | 20 | 61273055 | SLCO4A1        | 2 | EGFR and pan-negative |
| cg00837103 | 20 | 61447268 | COL9A3         | 2 | EGFR and pan-negative |
| cg06497752 | 20 | 61448534 | COL9A3         | 2 | EGFR and pan-negative |
| cg17237881 | 20 | 61867533 | BIRC7          | 2 | EGFR and pan-negative |
| cg07675169 | 20 | 61886262 | NKAIN4         | 2 | EGFR and pan-negative |
| cg12073594 | 20 | 61903495 | ARFGAP1        | 2 | EGFR and pan-negative |
| cg00318573 | 20 | 61993118 | CHRNA4         | 2 | EGFR and pan-negative |
| cg08003150 | 20 | 62103627 | KCNQ2          | 2 | EGFR and pan-negative |
| cg23582408 | 20 | 62130111 | EEF1A2         | 2 | EGFR and pan-negative |
| cg22463915 | 20 | 62131260 | EEF1A2         | 2 | EGFR and pan-negative |
| cg08291098 | 20 | 62285239 | STMN3          | 2 | EGFR and pan-negative |
| cg05358404 | 20 | 62288950 | RTKL           | 2 | EGFR and pan-negative |
| cg03224418 | 20 | 62611858 | PRPF6          | 2 | EGFR and pan-negative |
| cg22940152 | 20 | 62669102 | LINC00176      | 2 | EGFR and pan-negative |
| cg26825412 | 20 | 62681428 | SOX18          | 2 | EGFR and pan-negative |
| cg01293143 | 20 | 62688326 | TCEA2          | 2 | EGFR and pan-negative |
| cg06255227 | 20 | 62738125 | NPBWR2         | 2 | EGFR and pan-negative |
| cg16772207 | 20 | 62795807 | MYT1           | 2 | EGFR and pan-negative |
| cg08538752 | 21 | 10990890 | TPTE           | 2 | EGFR and pan-negative |

|            |    |          |                     |   |                       |
|------------|----|----------|---------------------|---|-----------------------|
| cg02148834 | 21 | 10991354 | <i>TPTE</i>         | 2 | EGFR and pan-negative |
| cg07973461 | 21 | 11098794 | <i>BAGE3</i>        | 2 | EGFR and pan-negative |
| cg05674444 | 21 | 14414818 | <i>ANKRD30BP2</i>   | 2 | EGFR and pan-negative |
| cg00744433 | 21 | 18884067 | <i>CXADR</i>        | 2 | EGFR and pan-negative |
| cg20839025 | 21 | 19776616 | <i>TMPRSS15</i>     | 2 | EGFR and pan-negative |
| cg13297960 | 21 | 22370237 | <i>NCAM2</i>        | 2 | EGFR and pan-negative |
| cg25864727 | 21 | 26803075 | <i>LINC00158</i>    | 2 | EGFR and pan-negative |
| cg11344614 | 21 | 27010160 | <i>JAM2</i>         | 2 | EGFR and pan-negative |
| cg03382304 | 21 | 27012176 | <i>JAM2</i>         | 2 | EGFR and pan-negative |
| cg25085950 | 21 | 27108830 | <i>ATP5J</i>        | 2 | EGFR and pan-negative |
| cg13169373 | 21 | 27542843 | <i>APP</i>          | 2 | EGFR and pan-negative |
| cg00472814 | 21 | 28217676 | <i>ADAMTS1</i>      | 2 | EGFR and pan-negative |
| cg11189837 | 21 | 28218596 | <i>ADAMTS1</i>      | 2 | EGFR and pan-negative |
| cg18895813 | 21 | 28339705 | <i>ADAMTS5</i>      | 2 | EGFR and pan-negative |
| cg17266238 | 21 | 29385056 | <i>LINC00314</i>    | 2 | EGFR and pan-negative |
| cg06940107 | 21 | 29911783 | <i>LINC00161</i>    | 2 | EGFR and pan-negative |
| cg05406101 | 21 | 30392219 | <i>RWDD2B</i>       | 2 | EGFR and pan-negative |
| cg09542111 | 21 | 31312091 | <i>GRIK1</i>        | 2 | EGFR and pan-negative |
| cg21816539 | 21 | 31312328 | <i>GRIK1</i>        | 2 | EGFR and pan-negative |
| cg13792279 | 21 | 31538549 | <i>CLDN17</i>       | 2 | EGFR and pan-negative |
| cg04052038 | 21 | 31588123 | <i>CLDN8</i>        | 2 | EGFR and pan-negative |
| cg27071517 | 21 | 31768726 | <i>KRTAP13-1</i>    | 2 | EGFR and pan-negative |
| cg14062083 | 21 | 31802829 | <i>KRTAP13-4</i>    | 2 | EGFR and pan-negative |
| cg13139843 | 21 | 31852793 | <i>KRTAP19-1</i>    | 2 | EGFR and pan-negative |
| cg09828634 | 21 | 31859610 | <i>KRTAP19-2</i>    | 2 | EGFR and pan-negative |
| cg06748315 | 21 | 31864089 | <i>KRTAP19-3</i>    | 2 | EGFR and pan-negative |
| cg04297093 | 21 | 31864374 | <i>KRTAP19-3</i>    | 2 | EGFR and pan-negative |
| cg07374637 | 21 | 31875448 | <i>KRTAP19-5</i>    | 2 | EGFR and pan-negative |
| cg17503750 | 21 | 31913933 | <i>KRTAP19-6</i>    | 2 | EGFR and pan-negative |
| cg06324671 | 21 | 31933511 | <i>KRTAP19-7</i>    | 2 | EGFR and pan-negative |
| cg19306866 | 21 | 31970997 | <i>0</i>            | 2 | EGFR and pan-negative |
| cg27456885 | 21 | 31972913 | <i>KRTAP22-1</i>    | 2 | EGFR and pan-negative |
| cg03029616 | 21 | 31986034 | <i>KRTAP6-1</i>     | 2 | EGFR and pan-negative |
| cg26565975 | 21 | 31988616 | <i>KRTAP20-1</i>    | 2 | EGFR and pan-negative |
| cg23581186 | 21 | 32119309 | <i>KRTAP21-2</i>    | 2 | EGFR and pan-negative |
| cg06222800 | 21 | 32127416 | <i>0</i>            | 2 | EGFR and pan-negative |
| cg22643217 | 21 | 32253964 | <i>KRTAP11-1</i>    | 2 | EGFR and pan-negative |
| cg04409427 | 21 | 35736023 | <i>KCNE2</i>        | 2 | EGFR and pan-negative |
| cg00673191 | 21 | 37536923 | <i>DOPEY2</i>       | 2 | EGFR and pan-negative |
| cg02672220 | 21 | 38070588 | <i>SIM2</i>         | 2 | EGFR and pan-negative |
| cg13694867 | 21 | 38072100 | <i>SIM2</i>         | 2 | EGFR and pan-negative |
| cg12564962 | 21 | 38377938 | <i>RIPPLY3</i>      | 2 | EGFR and pan-negative |
| cg01262913 | 21 | 38580486 | <i>DSCR9</i>        | 2 | EGFR and pan-negative |
| cg05380982 | 21 | 39288378 | <i>KCNJ6</i>        | 2 | EGFR and pan-negative |
| cg21380842 | 21 | 39288830 | <i>KCNJ6</i>        | 2 | EGFR and pan-negative |
| cg17233935 | 21 | 39577230 | <i>DSCR10</i>       | 2 | EGFR and pan-negative |
| cg00544557 | 21 | 39578742 | <i>DSCR10</i>       | 2 | EGFR and pan-negative |
| cg18829411 | 21 | 40722023 | <i>HMGN1</i>        | 2 | EGFR and pan-negative |
| cg13287780 | 21 | 40751665 | <i>WRB</i>          | 2 | EGFR and pan-negative |
| cg12638745 | 21 | 40816464 | <i>LCA5L</i>        | 2 | EGFR and pan-negative |
| cg19946699 | 21 | 40817645 | <i>SH3BGR</i>       | 2 | EGFR and pan-negative |
| cg26709720 | 21 | 41027960 | <i>B3GALT5</i>      | 2 | EGFR and pan-negative |
| cg01309152 | 21 | 41239771 | <i>PCP4</i>         | 2 | EGFR and pan-negative |
| cg16334795 | 21 | 42538894 | <i>MIR3197</i>      | 2 | EGFR and pan-negative |
| cg03158400 | 21 | 42688886 | <i>FAM3B</i>        | 2 | EGFR and pan-negative |
| cg04828792 | 21 | 42733433 | <i>MX2</i>          | 2 | EGFR and pan-negative |
| cg24901042 | 21 | 42880554 | <i>TMPRSS2</i>      | 2 | EGFR and pan-negative |
| cg18963171 | 21 | 43442940 | <i>ZNF295-AS1</i>   | 2 | EGFR and pan-negative |
| cg04806409 | 21 | 43735505 | <i>TFF3</i>         | 2 | EGFR and pan-negative |
| cg11158374 | 21 | 43771664 | <i>TFF2</i>         | 2 | EGFR and pan-negative |
| cg02643667 | 21 | 43786699 | <i>TFF1</i>         | 2 | EGFR and pan-negative |
| cg00516481 | 21 | 44073202 | <i>PDE9A</i>        | 2 | EGFR and pan-negative |
| cg22633722 | 21 | 44496743 | <i>CBS</i>          | 2 | EGFR and pan-negative |
| cg21755709 | 21 | 45149398 | <i>PDXK</i>         | 2 | EGFR and pan-negative |
| cg08191854 | 21 | 45773294 | <i>TRPM2</i>        | 2 | EGFR and pan-negative |
| cg06812844 | 21 | 45773782 | <i>TRPM2</i>        | 2 | EGFR and pan-negative |
| cg23089840 | 21 | 45874886 | <i>LRRC3-AS1</i>    | 2 | EGFR and pan-negative |
| cg26632776 | 21 | 45875534 | <i>LRRC3</i>        | 2 | EGFR and pan-negative |
| cg02579133 | 21 | 46031741 | <i>KRTAP10-8</i>    | 2 | EGFR and pan-negative |
| cg17778867 | 21 | 46032026 | <i>KRTAP10-8</i>    | 2 | EGFR and pan-negative |
| cg22991148 | 21 | 46131099 | <i>TSPEAR</i>       | 2 | EGFR and pan-negative |
| cg20884362 | 21 | 46358702 | <i>C21orf67</i>     | 2 | EGFR and pan-negative |
| cg10719920 | 21 | 46724843 | <i>0</i>            | 2 | EGFR and pan-negative |
| cg18466173 | 21 | 46726267 | <i>0</i>            | 2 | EGFR and pan-negative |
| cg07658590 | 21 | 46963587 | <i>SLC19A1</i>      | 2 | EGFR and pan-negative |
| cg23473904 | 21 | 47517690 | <i>COL6A2</i>       | 2 | EGFR and pan-negative |
| cg07152925 | 21 | 48024683 | <i>S100B</i>        | 2 | EGFR and pan-negative |
| cg07443748 | 22 | 17073594 | <i>CCT8L2</i>       | 2 | EGFR and pan-negative |
| cg01474260 | 22 | 17073884 | <i>CCT8L2</i>       | 2 | EGFR and pan-negative |
| cg01731685 | 22 | 17565455 | <i>IL17RA</i>       | 2 | EGFR and pan-negative |
| cg18137704 | 22 | 17602681 | <i>LOC100996342</i> | 2 | EGFR and pan-negative |
| cg02555579 | 22 | 18043043 | <i>SLC25A18</i>     | 2 | EGFR and pan-negative |
| cg18003231 | 22 | 18043745 | <i>SLC25A18</i>     | 2 | EGFR and pan-negative |
| cg17505463 | 22 | 18780198 | <i>GGT3P</i>        | 2 | EGFR and pan-negative |
| cg05468303 | 22 | 18894389 | <i>DGCR6</i>        | 2 | EGFR and pan-negative |
| cg22297305 | 22 | 18923471 | <i>PRODH</i>        | 2 | EGFR and pan-negative |
| cg25759381 | 22 | 19118539 | <i>TSSK2</i>        | 2 | EGFR and pan-negative |
| cg26599006 | 22 | 19137371 | <i>GSC2</i>         | 2 | EGFR and pan-negative |
| cg07359545 | 22 | 19711327 | <i>GP1BB</i>        | 2 | EGFR and pan-negative |
| cg02887841 | 22 | 19744670 | <i>TBX1</i>         | 2 | EGFR and pan-negative |
| cg26646411 | 22 | 19841374 | <i>C22orf29</i>     | 2 | EGFR and pan-negative |
| cg15926585 | 22 | 19928445 | <i>COMT</i>         | 2 | EGFR and pan-negative |
| cg00107488 | 22 | 19930437 | <i>TXNRD2</i>       | 2 | EGFR and pan-negative |
| cg23748737 | 22 | 20791733 | <i>SCARF2</i>       | 2 | EGFR and pan-negative |
| cg02523400 | 22 | 21128191 | <i>SERPIND1</i>     | 2 | EGFR and pan-negative |

|            |    |          |           |   |                       |
|------------|----|----------|-----------|---|-----------------------|
| cg07331806 | 22 | 21319894 | AIFM3     | 2 | EGFR and pan-negative |
| cg05442902 | 22 | 21369010 | P2RX6     | 2 | EGFR and pan-negative |
| cg10059104 | 22 | 21986360 | CCDC116   | 2 | EGFR and pan-negative |
| cg20295671 | 22 | 22090486 | YPEL1     | 2 | EGFR and pan-negative |
| cg05546044 | 22 | 22222597 | MAPK1     | 2 | EGFR and pan-negative |
| cg10081899 | 22 | 22307482 | PPM1F     | 2 | EGFR and pan-negative |
| cg15121304 | 22 | 22380100 | 0         | 2 | EGFR and pan-negative |
| cg00013618 | 22 | 22380839 | 0         | 2 | EGFR and pan-negative |
| cg14844130 | 22 | 22598937 | VPREB1    | 2 | EGFR and pan-negative |
| cg18441959 | 22 | 22599332 | VPREB1    | 2 | EGFR and pan-negative |
| cg05208878 | 22 | 22901596 | PRAME     | 2 | EGFR and pan-negative |
| cg10073042 | 22 | 22973200 | 0         | 2 | EGFR and pan-negative |
| cg23173455 | 22 | 22988684 | GGTLC2    | 2 | EGFR and pan-negative |
| cg01457622 | 22 | 22988833 | GGTLC2    | 2 | EGFR and pan-negative |
| cg13894021 | 22 | 23487383 | RAB36     | 2 | EGFR and pan-negative |
| cg00280814 | 22 | 23745389 | ZDHHCH8P1 | 2 | EGFR and pan-negative |
| cg18440048 | 22 | 24093826 | ZNF70     | 2 | EGFR and pan-negative |
| cg26574610 | 22 | 24095989 | VPREB3    | 2 | EGFR and pan-negative |
| cg10756887 | 22 | 24105692 | C22orf15  | 2 | EGFR and pan-negative |
| cg27532722 | 22 | 24115568 | MMP11     | 2 | EGFR and pan-negative |
| cg04394102 | 22 | 24321863 | DDT       | 2 | EGFR and pan-negative |
| cg24599739 | 22 | 24322308 | GSTT2     | 2 | EGFR and pan-negative |
| cg21949305 | 22 | 24828655 | ADORA2A   | 2 | EGFR and pan-negative |
| cg17647273 | 22 | 24891452 | UPB1      | 2 | EGFR and pan-negative |
| cg02401149 | 22 | 25595409 | CRYBB3    | 2 | EGFR and pan-negative |
| cg10490064 | 22 | 25617422 | CRYBB2    | 2 | EGFR and pan-negative |
| cg24113449 | 22 | 25961367 | ADRBK2    | 2 | EGFR and pan-negative |
| cg21353232 | 22 | 26564879 | SEZ6L     | 2 | EGFR and pan-negative |
| cg06206626 | 22 | 26825900 | ASPHD2    | 2 | EGFR and pan-negative |
| cg07924575 | 22 | 26881231 | SRRD      | 2 | EGFR and pan-negative |
| cg00757952 | 22 | 27014415 | CRYBB1    | 2 | EGFR and pan-negative |
| cg15559737 | 22 | 27016806 | CRYBA4    | 2 | EGFR and pan-negative |
| cg27269921 | 22 | 28197091 | MN1       | 2 | EGFR and pan-negative |
| cg02293044 | 22 | 29703543 | GAS2L1    | 2 | EGFR and pan-negative |
| cg25635500 | 22 | 29712139 | RASL10A   | 2 | EGFR and pan-negative |
| cg15303841 | 22 | 29833804 | RFPL1     | 2 | EGFR and pan-negative |
| cg16042149 | 22 | 29875947 | NEFH      | 2 | EGFR and pan-negative |
| cg13797031 | 22 | 29977742 | NIPSNAP1  | 2 | EGFR and pan-negative |
| cg07498879 | 22 | 30663041 | OSM       | 2 | EGFR and pan-negative |
| cg09426307 | 22 | 30868048 | SEC14L3   | 2 | EGFR and pan-negative |
| cg04030848 | 22 | 30960881 | GAL3ST1   | 2 | EGFR and pan-negative |
| cg18053607 | 22 | 31518963 | INPP5J    | 2 | EGFR and pan-negative |
| cg21578906 | 22 | 32651345 | SLC5A4    | 2 | EGFR and pan-negative |
| cg13005002 | 22 | 32752769 | RFPL3     | 2 | EGFR and pan-negative |
| cg00406844 | 22 | 32753939 | RFPL3     | 2 | EGFR and pan-negative |
| cg26431343 | 22 | 32808764 | RTCB      | 2 | EGFR and pan-negative |
| cg14789590 | 22 | 32853844 | BPIFC     | 2 | EGFR and pan-negative |
| cg05260966 | 22 | 33197394 | TIMP3     | 2 | EGFR and pan-negative |
| cg22578204 | 22 | 33197952 | TIMP3     | 2 | EGFR and pan-negative |
| cg05288803 | 22 | 33198055 | TIMP3     | 2 | EGFR and pan-negative |
| cg16894211 | 22 | 33403542 | SYN3      | 2 | EGFR and pan-negative |
| cg00199549 | 22 | 35795374 | MCM5      | 2 | EGFR and pan-negative |
| cg20162146 | 22 | 35795394 | MCM5      | 2 | EGFR and pan-negative |
| cg14473016 | 22 | 35937495 | RASD2     | 2 | EGFR and pan-negative |
| cg09432376 | 22 | 36044226 | APOL6     | 2 | EGFR and pan-negative |
| cg03128832 | 22 | 36112902 | APOL5     | 2 | EGFR and pan-negative |
| cg00615377 | 22 | 36236649 | RBFOX2    | 2 | EGFR and pan-negative |
| cg06293195 | 22 | 36878654 | TXN2      | 2 | EGFR and pan-negative |
| cg05475277 | 22 | 36902578 | FOXRED2   | 2 | EGFR and pan-negative |
| cg01151699 | 22 | 37099259 | CACNG2    | 2 | EGFR and pan-negative |
| cg09624565 | 22 | 37256900 | NCF4      | 2 | EGFR and pan-negative |
| cg16356956 | 22 | 37317934 | CSF2RB    | 2 | EGFR and pan-negative |
| cg22229142 | 22 | 37447306 | KCTD17    | 2 | EGFR and pan-negative |
| cg21271753 | 22 | 37499451 | TMPPRSS6  | 2 | EGFR and pan-negative |
| cg26757673 | 22 | 37545423 | IL2RB     | 2 | EGFR and pan-negative |
| cg14297029 | 22 | 37607676 | SSTR3     | 2 | EGFR and pan-negative |
| cg03389133 | 22 | 37608611 | SSTR3     | 2 | EGFR and pan-negative |
| cg11201532 | 22 | 37882078 | MFNG      | 2 | EGFR and pan-negative |
| cg27553637 | 22 | 37957154 | CDC42EP1  | 2 | EGFR and pan-negative |
| cg06521852 | 22 | 38141419 | TRIOBP    | 2 | EGFR and pan-negative |
| cg19070798 | 22 | 38240558 | MIR658    | 2 | EGFR and pan-negative |
| cg14127659 | 22 | 38350784 | C22orf23  | 2 | EGFR and pan-negative |
| cg06614002 | 22 | 38380439 | SOX10     | 2 | EGFR and pan-negative |
| cg19257200 | 22 | 38380983 | SOX10     | 2 | EGFR and pan-negative |
| cg14014225 | 22 | 38479236 | SLC16A8   | 2 | EGFR and pan-negative |
| cg23583739 | 22 | 38863908 | KDELR3    | 2 | EGFR and pan-negative |
| cg09991975 | 22 | 39096760 | JOSD1     | 2 | EGFR and pan-negative |
| cg04286933 | 22 | 39472743 | APOBEC3G  | 2 | EGFR and pan-negative |
| cg23124451 | 22 | 39548131 | CBX7      | 2 | EGFR and pan-negative |
| cg19167673 | 22 | 39640835 | PDGFB     | 2 | EGFR and pan-negative |
| cg19713460 | 22 | 39745530 | SYNGR1    | 2 | EGFR and pan-negative |
| cg25956985 | 22 | 39795188 | TAB1      | 2 | EGFR and pan-negative |
| cg18399321 | 22 | 39853590 | MGAT3     | 2 | EGFR and pan-negative |
| cg13462160 | 22 | 39916704 | ATF4      | 2 | EGFR and pan-negative |
| cg03840259 | 22 | 40297036 | GRAP2     | 2 | EGFR and pan-negative |
| cg25712380 | 22 | 40297826 | GRAP2     | 2 | EGFR and pan-negative |
| cg21771250 | 22 | 40406049 | FAM83F    | 2 | EGFR and pan-negative |
| cg06594008 | 22 | 41033637 | MKL1      | 2 | EGFR and pan-negative |
| cg06264060 | 22 | 41075007 | MCHR1     | 2 | EGFR and pan-negative |
| cg04283938 | 22 | 42373298 | 42616     | 2 | EGFR and pan-negative |
| cg10840135 | 22 | 42526619 | CYP2D6    | 2 | EGFR and pan-negative |
| cg11221132 | 22 | 42540342 | CYP2D7P1  | 2 | EGFR and pan-negative |
| cg17568996 | 22 | 42828125 | NFAM1     | 2 | EGFR and pan-negative |
| cg07393322 | 22 | 43117318 | A4GALT    | 2 | EGFR and pan-negative |
| cg26453588 | 22 | 43506021 | BIK       | 2 | EGFR and pan-negative |

|            |    |           |            |   |                       |
|------------|----|-----------|------------|---|-----------------------|
| cg26219051 | 22 | 43739629  | SCUBE1     | 2 | EGFR and pan-negative |
| cg02261346 | 22 | 43898597  | MPPED1     | 2 | EGFR and pan-negative |
| cg05472874 | 22 | 44258179  | SULT4A1    | 2 | EGFR and pan-negative |
| cg27501458 | 22 | 44258690  | SULT4A1    | 2 | EGFR and pan-negative |
| cg04755031 | 22 | 44287841  | PNPLA5     | 2 | EGFR and pan-negative |
| cg03118854 | 22 | 44288155  | PNPLA5     | 2 | EGFR and pan-negative |
| cg13184872 | 22 | 44319719  | PNPLA3     | 2 | EGFR and pan-negative |
| cg19863740 | 22 | 44576869  | PARVG      | 2 | EGFR and pan-negative |
| cg23240895 | 22 | 45071884  | PRR5       | 2 | EGFR and pan-negative |
| cg01775414 | 22 | 45405404  | PHF21B     | 2 | EGFR and pan-negative |
| cg05064352 | 22 | 45406545  | PHF21B     | 2 | EGFR and pan-negative |
| cg06575572 | 22 | 45705265  | FAM118A    | 2 | EGFR and pan-negative |
| cg04329382 | 22 | 46480891  | MIRLET7BHG | 2 | EGFR and pan-negative |
| cg07546360 | 22 | 46482023  | MIRLET7BHG | 2 | EGFR and pan-negative |
| cg09829176 | 22 | 46545347  | PPARA      | 2 | EGFR and pan-negative |
| cg11377136 | 22 | 46658960  | PKDREJ     | 2 | EGFR and pan-negative |
| cg08315277 | 22 | 46659398  | PKDREJ     | 2 | EGFR and pan-negative |
| cg06041363 | 22 | 46663418  | TTC38      | 2 | EGFR and pan-negative |
| cg15149938 | 22 | 50018392  | C22orf34   | 2 | EGFR and pan-negative |
| cg25882056 | 22 | 50311056  | ALG12      | 2 | EGFR and pan-negative |
| cg05861567 | 22 | 50523686  | MLC1       | 2 | EGFR and pan-negative |
| cg04586023 | 22 | 50690380  | HDAC10     | 2 | EGFR and pan-negative |
| cg21974239 | 22 | 50700478  | MAPK12     | 2 | EGFR and pan-negative |
| cg00983520 | 22 | 51017067  | CPT1B      | 2 | EGFR and pan-negative |
| cg02756845 | 22 | 51038542  | MAPK8IP2   | 2 | EGFR and pan-negative |
| cg05615487 | 22 | 51176407  | ACR        | 2 | EGFR and pan-negative |
| cg04743650 | 1  | 101185070 | VCAM1      | 2 | EGFR and ROS1         |
| cg00095526 | 1  | 201081686 | CACNA1S    | 2 | EGFR and ROS1         |
| cg22395019 | 2  | 31361692  | GALNT14    | 2 | EGFR and ROS1         |
| cg11783497 | 2  | 113875292 | IL1RN      | 2 | EGFR and ROS1         |
| cg09845785 | 2  | 183387501 | PDE1A      | 2 | EGFR and ROS1         |
| cg18992201 | 3  | 109035381 | DPPA2      | 2 | EGFR and ROS1         |
| cg04653021 | 3  | 122514541 | DIRC2      | 2 | EGFR and ROS1         |
| cg03731616 | 3  | 123603618 | MYLK       | 2 | EGFR and ROS1         |
| cg09156233 | 4  | 95679705  | BMPR1B     | 2 | EGFR and ROS1         |
| cg05996042 | 6  | 45295718  | RUNX2      | 2 | EGFR and ROS1         |
| cg14477619 | 7  | 44580881  | NPC1L1     | 2 | EGFR and ROS1         |
| cg08399444 | 12 | 13248548  | GSF1       | 2 | EGFR and ROS1         |
| cg03742214 | 12 | 107487383 | CRY1       | 2 | EGFR and ROS1         |
| cg06150803 | 13 | 24144257  | TNFRSF19   | 2 | EGFR and ROS1         |
| cg05654163 | 14 | 21467502  | SLC39A2    | 2 | EGFR and ROS1         |
| cg12600197 | 15 | 75639339  | NEIL1      | 2 | EGFR and ROS1         |
| cg26861460 | 22 | 44575455  | PARVG      | 2 | EGFR and ROS1         |
| cg14254419 | 1  | 110162217 | AMPD2      | 2 | KRAS and pan-negative |
| cg15044041 | 3  | 113160313 | WDR52      | 2 | KRAS and pan-negative |
| cg00888007 | 12 | 4382184   | CCND2      | 2 | KRAS and pan-negative |
| cg03381111 | 15 | 25296571  | SNORD116-1 | 2 | KRAS and pan-negative |
| cg17501569 | 16 | 811064    | MSLN       | 2 | KRAS and pan-negative |
| cg03421687 | 3  | 50383251  | ZMYND10    | 2 | KRAS and ROS1         |
| cg17050972 | 6  | 27782197  | HIST1H2AJ  | 2 | ROS1 and pan-negative |
| cg25123470 | 10 | 103603722 | KCNIP2     | 2 | ROS1 and pan-negative |
| cg14209518 | 11 | 114166636 | NNMT       | 2 | ROS1 and pan-negative |
| cg04672450 | 1  | 860185    | SAMD11     | - | EGFR                  |
| cg21832150 | 1  | 902025    | PLEKHN1    | - | EGFR                  |
| cg25203980 | 1  | 1238595   | ACAP3      | - | EGFR                  |
| cg11405695 | 1  | 1384091   | ATAD3C     | - | EGFR                  |
| cg27383362 | 1  | 1385371   | ATAD3C     | - | EGFR                  |
| cg24087944 | 1  | 1950111   | GABRD      | - | EGFR                  |
| cg03533858 | 1  | 2324396   | RER1       | - | EGFR                  |
| cg05360220 | 1  | 2488036   | TNFRSF14   | - | EGFR                  |
| cg14365123 | 1  | 2938246   | ACTRT2     | - | EGFR                  |
| cg25115460 | 1  | 3607110   | TP73       | - | EGFR                  |
| cg03716999 | 1  | 6265802   | RNF207     | - | EGFR                  |
| cg02084087 | 1  | 6526049   | TNFRSF25   | - | EGFR                  |
| cg25514503 | 1  | 7845070   | PER3       | - | EGFR                  |
| cg19560758 | 1  | 8086721   | ERRF1      | - | EGFR                  |
| cg11283860 | 1  | 8273352   | 0          | - | EGFR                  |
| cg03679305 | 1  | 9129487   | SLC2A5     | - | EGFR                  |
| cg24480859 | 1  | 9129791   | SLC2A5     | - | EGFR                  |
| cg20994801 | 1  | 9711398   | PIK3CD     | - | EGFR                  |
| cg06615861 | 1  | 10271191  | KIF1B      | - | EGFR                  |
| cg05352668 | 1  | 11023756  | C1orf127   | - | EGFR                  |
| cg11858029 | 1  | 11324407  | 0          | - | EGFR                  |
| cg05228408 | 1  | 11865352  | CLCN6      | - | EGFR                  |
| cg14472778 | 1  | 11867308  | MTHFR      | - | EGFR                  |
| cg25021182 | 1  | 15802594  | CELA2B     | - | EGFR                  |
| cg15616400 | 1  | 16062894  | SLC25A34   | - | EGFR                  |
| cg21660130 | 1  | 16370243  | CLCNKB     | - | EGFR                  |
| cg12858514 | 1  | 17575607  | PADI3      | - | EGFR                  |
| cg23625458 | 1  | 19600141  | AKR7L      | - | EGFR                  |
| cg21057046 | 1  | 19970204  | NBL1       | - | EGFR                  |
| cg11037787 | 1  | 20307002  | PLA2G2A    | - | EGFR                  |
| cg06911113 | 1  | 20512617  | UBXN10     | - | EGFR                  |
| cg13164309 | 1  | 20898017  | 0          | - | EGFR                  |
| cg13149996 | 1  | 21437982  | EIF4G3     | - | EGFR                  |
| cg12274479 | 1  | 22264515  | HSPG2      | - | EGFR                  |
| cg27069753 | 1  | 22303571  | CELA3B     | - | EGFR                  |
| cg10779183 | 1  | 22328467  | CELA3A     | - | EGFR                  |
| cg11155265 | 1  | 23811445  | ASAP3      | - | EGFR                  |
| cg23574449 | 1  | 23857223  | E2F2       | - | EGFR                  |
| cg13980834 | 1  | 24727850  | STPG1      | - | EGFR                  |
| cg03140978 | 1  | 24728127  | STPG1      | - | EGFR                  |
| cg04757093 | 1  | 25229192  | RUNX3      | - | EGFR                  |
| cg04631202 | 1  | 25942460  | MAN1C1     | - | EGFR                  |
| cg21187265 | 1  | 26127185  | SEPN1      | - | EGFR                  |

|            |   |           |           |   |      |
|------------|---|-----------|-----------|---|------|
| cg23799313 | 1 | 26198360  | PAQR7     | - | EGFR |
| cg22436229 | 1 | 26437241  | PDIK1L    | - | EGFR |
| cg01414934 | 1 | 26605969  | SH3BGRL3  | - | EGFR |
| cg10705251 | 1 | 26699605  | ZNF683    | - | EGFR |
| cg17385674 | 1 | 27021704  | ARID1A    | - | EGFR |
| cg06650260 | 1 | 27240478  | NR0B2     | - | EGFR |
| cg16762386 | 1 | 27240514  | NR0B2     | - | EGFR |
| cg21921474 | 1 | 27287181  | C1orf172  | - | EGFR |
| cg19125999 | 1 | 27287282  | C1orf172  | - | EGFR |
| cg18468844 | 1 | 28503720  | PTAFR     | - | EGFR |
| cg09837361 | 1 | 28996131  | GMEB1     | - | EGFR |
| cg09970593 | 1 | 29139522  | OPRD1     | - | EGFR |
| cg12732155 | 1 | 31230601  | LAPTM5    | - | EGFR |
| cg10001720 | 1 | 31231363  | LAPTM5    | - | EGFR |
| cg14407437 | 1 | 31845923  | FABP3     | - | EGFR |
| cg17803965 | 1 | 32281812  | SPOCD1    | - | EGFR |
| cg01525376 | 1 | 32716212  | LCK       | - | EGFR |
| cg05154390 | 1 | 36929274  | MRPS15    | - | EGFR |
| cg01214209 | 1 | 38258995  | MANEAL    | - | EGFR |
| cg12158019 | 1 | 40237316  | OXCT2     | - | EGFR |
| cg08394377 | 1 | 41132022  | RIMS3     | - | EGFR |
| cg17994910 | 1 | 42948516  | 0         | - | EGFR |
| cg19101893 | 1 | 43283862  | CCDC23    | - | EGFR |
| cg00410895 | 1 | 43283884  | CCDC23    | - | EGFR |
| cg06948408 | 1 | 43736600  | TMEM125   | - | EGFR |
| cg06207804 | 1 | 44398998  | ARTN      | - | EGFR |
| cg09360654 | 1 | 45806501  | MUTYH     | - | EGFR |
| cg12671744 | 1 | 46859774  | FAAH      | - | EGFR |
| cg19987219 | 1 | 47016749  | KNCN      | - | EGFR |
| cg10751811 | 1 | 47533976  | CYP4Z1    | - | EGFR |
| cg18983672 | 1 | 47881256  | FOXE3     | - | EGFR |
| cg22429822 | 1 | 52456361  | RAB3B     | - | EGFR |
| cg17095731 | 1 | 53794313  | LRP8      | - | EGFR |
| cg23780947 | 1 | 54304852  | NDC1      | - | EGFR |
| cg01182697 | 1 | 54520432  | TCEANC2   | - | EGFR |
| cg20793071 | 1 | 54520450  | TCEANC2   | - | EGFR |
| cg02255609 | 1 | 55181269  | TTC4      | - | EGFR |
| cg02008416 | 1 | 55445880  | TMEM61    | - | EGFR |
| cg16080552 | 1 | 59043199  | TACSTD2   | - | EGFR |
| cg26815229 | 1 | 60392933  | CYP2J2    | - | EGFR |
| cg10316635 | 1 | 62208645  | INADL     | - | EGFR |
| cg21409833 | 1 | 63062724  | ANGPTL3   | - | EGFR |
| cg25013852 | 1 | 64058941  | PGM1      | - | EGFR |
| cg01356829 | 1 | 67772896  | IL12RB2   | - | EGFR |
| cg09118625 | 1 | 68512971  | DIRAS3    | - | EGFR |
| cg02317907 | 1 | 68515788  | DIRAS3    | - | EGFR |
| cg11724759 | 1 | 68915898  | RPE65     | - | EGFR |
| cg12739034 | 1 | 71513626  | PTGER3    | - | EGFR |
| cg01784199 | 1 | 78470506  | DNAJB4    | - | EGFR |
| cg21968580 | 1 | 78470640  | DNAJB4    | - | EGFR |
| cg06501070 | 1 | 85331899  | LPAR3     | - | EGFR |
| cg04453065 | 1 | 86046661  | CYR61     | - | EGFR |
| cg00077457 | 1 | 90460000  | GEMIN8P4  | - | EGFR |
| cg03460527 | 1 | 95008117  | F3        | - | EGFR |
| cg26619317 | 1 | 95392389  | CNN3      | - | EGFR |
| cg13482485 | 1 | 99127787  | SNX7      | - | EGFR |
| cg07232688 | 1 | 100644688 | LRRC39    | - | EGFR |
| cg04870470 | 1 | 101359714 | EXTL2     | - | EGFR |
| cg19038540 | 1 | 101701364 | S1PR1     | - | EGFR |
| cg11481351 | 1 | 109265387 | FNDC7     | - | EGFR |
| cg16797831 | 1 | 109657035 | KIAA1324  | - | EGFR |
| cg12234947 | 1 | 110156820 | GNAT2     | - | EGFR |
| cg25027501 | 1 | 110283223 | GSTM3     | - | EGFR |
| cg16893614 | 1 | 110614450 | ALX3      | - | EGFR |
| cg21926138 | 1 | 111889420 | PIFO      | - | EGFR |
| cg23746359 | 1 | 113261764 | FAM19A3   | - | EGFR |
| cg01580044 | 1 | 114300656 | PHTF1     | - | EGFR |
| cg21184174 | 1 | 115881214 | NGF       | - | EGFR |
| cg21039631 | 1 | 117112854 | CD58      | - | EGFR |
| cg03752628 | 1 | 117453510 | PTGFRN    | - | EGFR |
| cg08920071 | 1 | 117544781 | CD101     | - | EGFR |
| cg04624659 | 1 | 118727817 | SPAG17    | - | EGFR |
| cg09497789 | 1 | 118728212 | SPAG17    | - | EGFR |
| cg03762535 | 1 | 119911480 | HAO2      | - | EGFR |
| cg04087608 | 1 | 119957969 | HSD3B2    | - | EGFR |
| cg23131777 | 1 | 120438925 | ADAM30    | - | EGFR |
| cg21047206 | 1 | 145076221 | PDE4DIP   | - | EGFR |
| cg06589885 | 1 | 145413193 | HFE2      | - | EGFR |
| cg25173010 | 1 | 145438031 | TXNIP     | - | EGFR |
| cg19389852 | 1 | 145439013 | TXNIP     | - | EGFR |
| cg02245418 | 1 | 145609675 | POLR3C    | - | EGFR |
| cg22857957 | 1 | 146697082 | FMO5      | - | EGFR |
| cg14161885 | 1 | 148560976 | NBPF15    | - | EGFR |
| cg08908355 | 1 | 149857186 | HIST2H2BE | - | EGFR |
| cg08934443 | 1 | 149859898 | HIST2H2AB | - | EGFR |
| cg06605933 | 1 | 149870977 | BOLA1     | - | EGFR |
| cg15384717 | 1 | 150294084 | PRPF3     | - | EGFR |
| cg13454184 | 1 | 150459676 | TARS2     | - | EGFR |
| cg11512771 | 1 | 150479487 | ECM1      | - | EGFR |
| cg08578023 | 1 | 150738173 | CTSS      | - | EGFR |
| cg18611122 | 1 | 150947896 | CERS2     | - | EGFR |
| cg01958916 | 1 | 151119525 | SEMA6C    | - | EGFR |
| cg02301754 | 1 | 151149370 | TMOD4     | - | EGFR |
| cg18515587 | 1 | 151344806 | SELENBP1  | - | EGFR |
| cg19836808 | 1 | 153432916 | S100A7    | - | EGFR |

|            |   |           |                 |   |      |
|------------|---|-----------|-----------------|---|------|
| cg24691453 | 1 | 153518384 | <i>S100A4</i>   | - | EGFR |
| cg17729941 | 1 | 153607617 | <i>S100A13</i>  | - | EGFR |
| cg09929564 | 1 | 153643582 | <i>ILF2</i>     | - | EGFR |
| cg25667202 | 1 | 153963072 | <i>RPS27</i>    | - | EGFR |
| cg12205230 | 1 | 154164951 | <i>TPM3</i>     | - | EGFR |
| cg20713492 | 1 | 154293482 | <i>AQP10</i>    | - | EGFR |
| cg17891149 | 1 | 154948248 | <i>MIR4258</i>  | - | EGFR |
| cg19216044 | 1 | 155005184 | <i>DCST2</i>    | - | EGFR |
| cg24034289 | 1 | 155232344 | <i>SCAMP3</i>   | - | EGFR |
| cg21985470 | 1 | 155271423 | <i>PKLR</i>     | - | EGFR |
| cg12489819 | 1 | 155278858 | <i>FDPS</i>     | - | EGFR |
| cg05150177 | 1 | 155829110 | <i>SYT11</i>    | - | EGFR |
| cg00503458 | 1 | 155904439 | <i>KIAA0907</i> | - | EGFR |
| cg08403419 | 1 | 155911238 | <i>RXFP4</i>    | - | EGFR |
| cg23320056 | 1 | 155948742 | <i>ARHGEF2</i>  | - | EGFR |
| cg16907075 | 1 | 156022875 | <i>UBQLN4</i>   | - | EGFR |
| cg09822001 | 1 | 156561334 | <i>APOA1BP</i>  | - | EGFR |
| cg14277848 | 1 | 156570825 | <i>GPATCH4</i>  | - | EGFR |
| cg02609880 | 1 | 156611087 | <i>BCAN</i>     | - | EGFR |
| cg00626119 | 1 | 156785288 | <i>NTRK1</i>    | - | EGFR |
| cg25827666 | 1 | 156785558 | <i>NTRK1</i>    | - | EGFR |
| cg12995941 | 1 | 156829377 | <i>INSRR</i>    | - | EGFR |
| cg09737668 | 1 | 159923525 | <i>SLAMF9</i>   | - | EGFR |
| cg18913171 | 1 | 159925416 | <i>SLAMF9</i>   | - | EGFR |
| cg20066612 | 1 | 160050948 | <i>KCNJ9</i>    | - | EGFR |
| cg27497900 | 1 | 160312163 | <i>NCSTN</i>    | - | EGFR |
| cg18881723 | 1 | 160616870 | <i>SLAMF1</i>   | - | EGFR |
| cg05200628 | 1 | 160681760 | <i>CD48</i>     | - | EGFR |
| cg11939496 | 1 | 160833560 | <i>CD244</i>    | - | EGFR |
| cg27433062 | 1 | 161194369 | <i>APOA2</i>    | - | EGFR |
| cg25214346 | 1 | 161207966 | <i>NR1I3</i>    | - | EGFR |
| cg24422489 | 1 | 161474976 | <i>FCGR2A</i>   | - | EGFR |
| cg27470554 | 1 | 161475240 | <i>FCGR2A</i>   | - | EGFR |
| cg00974864 | 1 | 161601053 | <i>FCGR3B</i>   | - | EGFR |
| cg16359129 | 1 | 162347752 | <i>C1orf226</i> | - | EGFR |
| cg07175007 | 1 | 162467185 | <i>UHMK1</i>    | - | EGFR |
| cg22605643 | 1 | 163039012 | <i>RGS4</i>     | - | EGFR |
| cg09501516 | 1 | 163039155 | <i>RGS4</i>     | - | EGFR |
| cg24489237 | 1 | 164529170 | <i>PBX1</i>     | - | EGFR |
| cg26079320 | 1 | 166809407 | <i>POGK</i>     | - | EGFR |
| cg12336540 | 1 | 167598993 | <i>RCSD1</i>    | - | EGFR |
| cg24597988 | 1 | 169681749 | <i>SELL</i>     | - | EGFR |
| cg18063149 | 1 | 171060071 | <i>FMO3</i>     | - | EGFR |
| cg21183846 | 1 | 171283203 | <i>FMO4</i>     | - | EGFR |
| cg08587864 | 1 | 172413612 | <i>PIGC</i>     | - | EGFR |
| cg16517394 | 1 | 173176362 | <i>TNFSF4</i>   | - | EGFR |
| cg10861599 | 1 | 173176523 | <i>TNFSF4</i>   | - | EGFR |
| cg14047008 | 1 | 173887011 | <i>SERPINC1</i> | - | EGFR |
| cg21076470 | 1 | 174992744 | <i>MRPS14</i>   | - | EGFR |
| cg18433086 | 1 | 179199613 | <i>ABL2</i>     | - | EGFR |
| cg02275294 | 1 | 179262462 | <i>SOAT1</i>    | - | EGFR |
| cg10202457 | 1 | 183387751 | <i>NMNAT2</i>   | - | EGFR |
| cg01579216 | 1 | 183560913 | <i>NCF2</i>     | - | EGFR |
| cg11320084 | 1 | 185014181 | <i>RNF2</i>     | - | EGFR |
| cg15774283 | 1 | 186649881 | <i>PTGS2</i>    | - | EGFR |
| cg05023691 | 1 | 192605253 | <i>RGS13</i>    | - | EGFR |
| cg19984039 | 1 | 192605388 | <i>RGS13</i>    | - | EGFR |
| cg15361231 | 1 | 193075191 | <i>GLRX2</i>    | - | EGFR |
| cg10704545 | 1 | 193075590 | <i>GLRX2</i>    | - | EGFR |
| cg25921910 | 1 | 193090657 | <i>CDC73</i>    | - | EGFR |
| cg13463167 | 1 | 197523608 | <i>DENND1B</i>  | - | EGFR |
| cg12958813 | 1 | 198509669 | <i>ATP6V1G3</i> | - | EGFR |
| cg13673094 | 1 | 198608361 | <i>PTPRC</i>    | - | EGFR |
| cg19713196 | 1 | 201368390 | <i>LAD1</i>     | - | EGFR |
| cg00617305 | 1 | 201857940 | <i>SHISA4</i>   | - | EGFR |
| cg26203861 | 1 | 201858661 | <i>SHISA4</i>   | - | EGFR |
| cg09404633 | 1 | 201915446 | <i>LMOD1</i>    | - | EGFR |
| cg09636671 | 1 | 201915873 | <i>LMOD1</i>    | - | EGFR |
| cg23901896 | 1 | 201976446 | <i>0</i>        | - | EGFR |
| cg18275051 | 1 | 202937114 | <i>CYB5R1</i>   | - | EGFR |
| cg03764585 | 1 | 203320223 | <i>FMOD</i>     | - | EGFR |
| cg26987645 | 1 | 203320386 | <i>FMOD</i>     | - | EGFR |
| cg05955301 | 1 | 203444536 | <i>PRELP</i>    | - | EGFR |
| cg07947930 | 1 | 203444945 | <i>PRELP</i>    | - | EGFR |
| cg10117369 | 1 | 203734256 | <i>LAX1</i>     | - | EGFR |
| cg05556020 | 1 | 204135243 | <i>REN</i>      | - | EGFR |
| cg14717946 | 1 | 205090841 | <i>RBBP5</i>    | - | EGFR |
| cg08353146 | 1 | 205196756 | <i>TMCC2</i>    | - | EGFR |
| cg21478222 | 1 | 205601572 | <i>ELK4</i>     | - | EGFR |
| cg23282674 | 1 | 207039302 | <i>IL20</i>     | - | EGFR |
| cg02105856 | 1 | 207119784 | <i>PIGR</i>     | - | EGFR |
| cg20953047 | 1 | 207120022 | <i>PIGR</i>     | - | EGFR |
| cg05659947 | 1 | 207262190 | <i>C4BPB</i>    | - | EGFR |
| cg11070419 | 1 | 207277210 | <i>C4BPA</i>    | - | EGFR |
| cg03583857 | 1 | 208085022 | <i>CD34</i>     | - | EGFR |
| cg23283495 | 1 | 209979779 | <i>IRF6</i>     | - | EGFR |
| cg22209624 | 1 | 210406738 | <i>SERTAD4</i>  | - | EGFR |
| cg12820481 | 1 | 211848760 | <i>NEK2</i>     | - | EGFR |
| cg11901954 | 1 | 212209499 | <i>INTS7</i>    | - | EGFR |
| cg01342792 | 1 | 212797322 | <i>FAM71A</i>   | - | EGFR |
| cg20538819 | 1 | 214724805 | <i>PTPN14</i>   | - | EGFR |
| cg07185695 | 1 | 220959586 | <i>42430</i>    | - | EGFR |
| cg05894797 | 1 | 227058941 | <i>PSEN2</i>    | - | EGFR |
| cg19789505 | 1 | 228394509 | <i>OBSCN</i>    | - | EGFR |
| cg23540518 | 1 | 228604566 | <i>TRIM17</i>   | - | EGFR |

|            |   |           |            |   |      |
|------------|---|-----------|------------|---|------|
| cg03825921 | 1 | 229407517 | RAB4A      | - | EGFR |
| cg17653969 | 1 | 229439834 | SPHAR      | - | EGFR |
| cg01320507 | 1 | 229440351 | SPHAR      | - | EGFR |
| cg19560210 | 1 | 230513337 | PGBD5      | - | EGFR |
| cg17031727 | 1 | 230777875 | COG2       | - | EGFR |
| cg27412093 | 1 | 230882387 | CAPN9      | - | EGFR |
| cg06585893 | 1 | 230883552 | CAPN9      | - | EGFR |
| cg11815363 | 1 | 233750184 | KCNK1      | - | EGFR |
| cg27277403 | 1 | 241694934 | KMO        | - | EGFR |
| cg18184219 | 1 | 243388524 | CEP170     | - | EGFR |
| cg18354594 | 1 | 247276647 | C1orf229   | - | EGFR |
| cg01184522 | 1 | 247495818 | ZNF496     | - | EGFR |
| cg11147193 | 2 | 10442040  | HPCAL1     | - | EGFR |
| cg14580982 | 2 | 10861364  | ATP6V1C2   | - | EGFR |
| cg02092466 | 2 | 11810631  | NTSR2      | - | EGFR |
| cg06636463 | 2 | 15731711  | DDX1       | - | EGFR |
| cg02204046 | 2 | 16080760  | MYCN       | - | EGFR |
| cg24242519 | 2 | 16846569  | FAM49A     | - | EGFR |
| cg10106284 | 2 | 16847988  | FAM49A     | - | EGFR |
| cg18220560 | 2 | 17936424  | GEN1       | - | EGFR |
| cg02742971 | 2 | 19558059  | OSR1       | - | EGFR |
| cg04809136 | 2 | 24300158  | SF3B14     | - | EGFR |
| cg27305303 | 2 | 26781231  | OTOF       | - | EGFR |
| cg22937804 | 2 | 27361879  | C2orf53    | - | EGFR |
| cg11618577 | 2 | 27665543  | KRTCAP3    | - | EGFR |
| cg17918501 | 2 | 27717709  | FNDC4      | - | EGFR |
| cg20229788 | 2 | 27718498  | FNDC4      | - | EGFR |
| cg01464985 | 2 | 27805622  | ZNF512     | - | EGFR |
| cg01109219 | 2 | 33660754  | RASGRP3    | - | EGFR |
| cg09212058 | 2 | 37543459  | PRKD3      | - | EGFR |
| cg05469695 | 2 | 37899953  | CDC42EP3   | - | EGFR |
| cg11130441 | 2 | 38358147  | CYP1B1-AS1 | - | EGFR |
| cg18008766 | 2 | 38978896  | SRSF7      | - | EGFR |
| cg19690101 | 2 | 39104195  | MORN2      | - | EGFR |
| cg25537724 | 2 | 39663782  | MAP4K3     | - | EGFR |
| cg01184449 | 2 | 42396170  | EML4       | - | EGFR |
| cg23759710 | 2 | 42990957  | OXER1      | - | EGFR |
| cg20289949 | 2 | 43019614  | HAAO       | - | EGFR |
| cg03894103 | 2 | 44586901  | PREPL      | - | EGFR |
| cg15759873 | 2 | 46746934  | ATP6V1E2   | - | EGFR |
| cg27485921 | 2 | 46747379  | ATP6V1E2   | - | EGFR |
| cg20613889 | 2 | 49381495  | FSHR       | - | EGFR |
| cg13467814 | 2 | 54013395  | ASB3       | - | EGFR |
| cg22166290 | 2 | 60780483  | BCL11A     | - | EGFR |
| cg17214210 | 2 | 61633421  | USP34      | - | EGFR |
| cg05155595 | 2 | 70008161  | ANXA4      | - | EGFR |
| cg06946880 | 2 | 71163123  | ATP6V1B1   | - | EGFR |
| cg18943195 | 2 | 73339228  | RAB11FIP5  | - | EGFR |
| cg24935900 | 2 | 73340724  | RAB11FIP5  | - | EGFR |
| cg09172980 | 2 | 73870174  | NAT8       | - | EGFR |
| cg00689340 | 2 | 74668672  | RTKN       | - | EGFR |
| cg15989091 | 2 | 74780172  | LOXL3      | - | EGFR |
| cg23674882 | 2 | 74780272  | LOXL3      | - | EGFR |
| cg24107142 | 2 | 75060355  | HK2        | - | EGFR |
| cg02508567 | 2 | 85361184  | TCF7L1     | - | EGFR |
| cg03380645 | 2 | 85895048  | SFTPB      | - | EGFR |
| cg02170525 | 2 | 87018382  | CD8A       | - | EGFR |
| cg07952391 | 2 | 88470173  | THNSL2     | - | EGFR |
| cg01895214 | 2 | 91847866  | LOC654342  | - | EGFR |
| cg05723825 | 2 | 95537475  | TEKT4      | - | EGFR |
| cg05443740 | 2 | 95963057  | KCNIP3     | - | EGFR |
| cg27297176 | 2 | 96257861  | TRIM43     | - | EGFR |
| cg01628803 | 2 | 98126764  | ANKRD36B   | - | EGFR |
| cg22241124 | 2 | 98986375  | CNGA3      | - | EGFR |
| cg09298484 | 2 | 99759406  | C2orf15    | - | EGFR |
| cg12232463 | 2 | 100926650 | LONRF2     | - | EGFR |
| cg22809047 | 2 | 101618261 | RPL31      | - | EGFR |
| cg15233681 | 2 | 102770602 | IL1R1      | - | EGFR |
| cg16386158 | 2 | 102927397 | IL1RL1     | - | EGFR |
| cg00585790 | 2 | 109204845 | LIMS1      | - | EGFR |
| cg03552103 | 2 | 110373002 | SOWAHC     | - | EGFR |
| cg06983551 | 2 | 111435583 | BUB1       | - | EGFR |
| cg01494593 | 2 | 111556249 | ACOXL      | - | EGFR |
| cg17947599 | 2 | 111556607 | ACOXL      | - | EGFR |
| cg10479672 | 2 | 113810641 | IL36B      | - | EGFR |
| cg21378206 | 2 | 113817043 | IL36RN     | - | EGFR |
| cg05949173 | 2 | 113825882 | IL1F10     | - | EGFR |
| cg13273136 | 2 | 113931565 | PSD4       | - | EGFR |
| cg04037952 | 2 | 131486950 | GPR148     | - | EGFR |
| cg24697329 | 2 | 131674376 | ARHGGEF4   | - | EGFR |
| cg24659201 | 2 | 133173718 | GPR39      | - | EGFR |
| cg15297650 | 2 | 135477056 | TMEM163    | - | EGFR |
| cg04106641 | 2 | 148779564 | ORC4       | - | EGFR |
| cg09500672 | 2 | 150186706 | LYPD6      | - | EGFR |
| cg16753209 | 2 | 152590992 | NEB        | - | EGFR |
| cg00168785 | 2 | 160142643 | WDSUB1     | - | EGFR |
| cg12335708 | 2 | 162931003 | DPP4       | - | EGFR |
| cg11460364 | 2 | 162931397 | DPP4       | - | EGFR |
| cg06564900 | 2 | 164592568 | FIGN       | - | EGFR |
| cg04143809 | 2 | 165812322 | SLC38A11   | - | EGFR |
| cg26853855 | 2 | 166428866 | CSRNP3     | - | EGFR |
| cg15739581 | 2 | 166626783 | GALNT3     | - | EGFR |
| cg22659356 | 2 | 169104591 | STK39      | - | EGFR |
| cg07338205 | 2 | 169757780 | G6PC2      | - | EGFR |
| cg12694555 | 2 | 170366463 | KLHL41     | - | EGFR |

|            |   |           |                |   |      |
|------------|---|-----------|----------------|---|------|
| cg14444244 | 2 | 172270326 | METTL8         | - | EGFR |
| cg16449464 | 2 | 172864337 | METAP1D        | - | EGFR |
| cg03608974 | 2 | 173940268 | ZAK            | - | EGFR |
| cg26781575 | 2 | 187558534 | FAM171B        | - | EGFR |
| cg06187947 | 2 | 189157042 | GULP1          | - | EGFR |
| cg14367014 | 2 | 203735128 | ICA1L          | - | EGFR |
| cg08478189 | 2 | 208030666 | KLF7           | - | EGFR |
| cg10692870 | 2 | 216300268 | FN1            | - | EGFR |
| cg25854162 | 2 | 217497617 | IGFBP2         | - | EGFR |
| cg22467567 | 2 | 217559885 | IGFBP5         | - | EGFR |
| cg13739417 | 2 | 218990627 | CXCR2          | - | EGFR |
| cg21613754 | 2 | 219133847 | AAMP           | - | EGFR |
| cg27170298 | 2 | 219524787 | BCS1L          | - | EGFR |
| cg04430204 | 2 | 219537816 | RNF25          | - | EGFR |
| cg17610929 | 2 | 220379044 | ASIC4          | - | EGFR |
| cg15808558 | 2 | 222437611 | EPHA4          | - | EGFR |
| cg26154999 | 2 | 225266346 | FAM124B        | - | EGFR |
| cg20683151 | 2 | 228243972 | TM4SF20        | - | EGFR |
| cg18250832 | 2 | 232395463 | NMUR1          | - | EGFR |
| cg22932215 | 2 | 232651635 | COPS7B         | - | EGFR |
| cg23667432 | 2 | 233244439 | ALPP           | - | EGFR |
| cg13982505 | 2 | 233642094 | KCNJ13         | - | EGFR |
| cg07026910 | 2 | 234070710 | INPP5D         | - | EGFR |
| cg08096010 | 2 | 234216562 | SAG            | - | EGFR |
| cg24768561 | 2 | 236401800 | AGAP1          | - | EGFR |
| cg08950375 | 2 | 238323400 | COL6A3         | - | EGFR |
| cg16426459 | 2 | 238396155 | MLPH           | - | EGFR |
| cg26427308 | 2 | 238475416 | PRLH           | - | EGFR |
| cg05664072 | 2 | 239198294 | PER2           | - | EGFR |
| cg08462247 | 2 | 241075202 | MYEOV2         | - | EGFR |
| cg18790143 | 2 | 241080464 | OTOS           | - | EGFR |
| cg03600687 | 2 | 242499012 | BOK-AS1        | - | EGFR |
| cg11487967 | 2 | 242968692 | 0              | - | EGFR |
| cg18847227 | 3 | 4509268   | SUMF1          | - | EGFR |
| cg24517042 | 3 | 8774409   | CAV3           | - | EGFR |
| cg20051033 | 3 | 9746059   | CPNE9          | - | EGFR |
| cg26417554 | 3 | 9886232   | RPUSD3         | - | EGFR |
| cg10387416 | 3 | 10290486  | TATDN2         | - | EGFR |
| cg09395732 | 3 | 10857456  | SLC6A11        | - | EGFR |
| cg23769143 | 3 | 12200667  | TIMP4          | - | EGFR |
| cg24642820 | 3 | 13462465  | NUP210         | - | EGFR |
| cg18808261 | 3 | 18464935  | SATB1          | - | EGFR |
| cg22286764 | 3 | 37428639  | 0              | - | EGFR |
| cg26113512 | 3 | 38035601  | VILL           | - | EGFR |
| cg04660410 | 3 | 38036034  | VILL           | - | EGFR |
| cg00807586 | 3 | 38080790  | DLEC1          | - | EGFR |
| cg16558203 | 3 | 38347392  | SLC22A14       | - | EGFR |
| cg00239685 | 3 | 39148342  | TTC21A         | - | EGFR |
| cg22638542 | 3 | 42624573  | SEC22C         | - | EGFR |
| cg26523005 | 3 | 42947267  | ZNF662         | - | EGFR |
| cg08595011 | 3 | 43147479  | GTDC2          | - | EGFR |
| cg24858591 | 3 | 44803638  | KIF15          | - | EGFR |
| cg05161795 | 3 | 45018949  | EXOSC7         | - | EGFR |
| cg04970117 | 3 | 45838037  | SLC6A20        | - | EGFR |
| cg03391568 | 3 | 46918266  | PTH1R          | - | EGFR |
| cg18984151 | 3 | 47555476  | ELP6           | - | EGFR |
| cg06049972 | 3 | 48646375  | UQCRC1         | - | EGFR |
| cg05323436 | 3 | 49171185  | LAMB2          | - | EGFR |
| cg25021247 | 3 | 49460162  | AMT            | - | EGFR |
| cg12788313 | 3 | 49726177  | MST1           | - | EGFR |
| cg14634738 | 3 | 50126100  | RBM5           | - | EGFR |
| cg15972294 | 3 | 50273096  | GNAI2          | - | EGFR |
| cg26918728 | 3 | 50311335  | SEMA3B         | - | EGFR |
| cg16913124 | 3 | 50338253  | HYAL3          | - | EGFR |
| cg04347447 | 3 | 50541467  | CACNA2D2       | - | EGFR |
| cg18501026 | 3 | 50712096  | MIR4787        | - | EGFR |
| cg03891319 | 3 | 52016838  | ACY1           | - | EGFR |
| cg02417408 | 3 | 52280688  | PPM1M          | - | EGFR |
| cg06134964 | 3 | 52812033  | ITIH1          | - | EGFR |
| cg22101147 | 3 | 52931946  | TMEM110-MUSTN1 | - | EGFR |
| cg19008809 | 3 | 53080682  | SFMBT1         | - | EGFR |
| cg06470471 | 3 | 54961911  | LRTM1          | - | EGFR |
| cg13705284 | 3 | 58523313  | ACOX2          | - | EGFR |
| cg09473585 | 3 | 62305519  | C3orf14        | - | EGFR |
| cg23047271 | 3 | 64210991  | PRICKLE2       | - | EGFR |
| cg22083047 | 3 | 64211464  | PRICKLE2       | - | EGFR |
| cg14870461 | 3 | 69062103  | EOGT           | - | EGFR |
| cg19859270 | 3 | 98251294  | GPR15          | - | EGFR |
| cg16984944 | 3 | 99979425  | TBC1D23        | - | EGFR |
| cg16396948 | 3 | 111603394 | PHLDB2         | - | EGFR |
| cg17638468 | 3 | 112694062 | CD200R1        | - | EGFR |
| cg25836326 | 3 | 113898609 | DRD3           | - | EGFR |
| cg00216361 | 3 | 115342527 | GAP43          | - | EGFR |
| cg25315362 | 3 | 116164576 | LSAMP          | - | EGFR |
| cg25372693 | 3 | 118959985 | B4GALT4        | - | EGFR |
| cg06648029 | 3 | 119499749 | NR112          | - | EGFR |
| cg20114394 | 3 | 120170441 | FSTL1          | - | EGFR |
| cg22468055 | 3 | 122334227 | PARP15         | - | EGFR |
| cg05781767 | 3 | 127347362 | PODXL2         | - | EGFR |
| cg07084746 | 3 | 128294647 | C3orf27        | - | EGFR |
| cg16098726 | 3 | 128778738 | GP9            | - | EGFR |
| cg24770850 | 3 | 129325130 | PLXND1         | - | EGFR |
| cg17775713 | 3 | 133465469 | TF             | - | EGFR |
| cg20591405 | 3 | 133614578 | RAB6B          | - | EGFR |
| cg07708788 | 3 | 133748311 | SLCO2A1        | - | EGFR |

|            |   |           |              |   |      |
|------------|---|-----------|--------------|---|------|
| cg15484384 | 3 | 134203672 | CEP63        | - | EGFR |
| cg02672493 | 3 | 136537709 | SLC35G2      | - | EGFR |
| cg15980408 | 3 | 136538141 | SLC35G2      | - | EGFR |
| cg06392589 | 3 | 136676846 | IL20RB       | - | EGFR |
| cg13099330 | 3 | 139257799 | RBP1         | - | EGFR |
| cg00400028 | 3 | 140949916 | ACPL2        | - | EGFR |
| cg19709625 | 3 | 142607981 | PCOLCE2      | - | EGFR |
| cg25250358 | 3 | 145879084 | PLOD2        | - | EGFR |
| cg10148280 | 3 | 148846750 | HPS3         | - | EGFR |
| cg09571369 | 3 | 150996563 | P2RY14       | - | EGFR |
| cg24474182 | 3 | 151047307 | P2RY13       | - | EGFR |
| cg05094216 | 3 | 151101921 | P2RY12       | - | EGFR |
| cg12360736 | 3 | 151985869 | MBNL1        | - | EGFR |
| cg20182358 | 3 | 158289061 | MLF1         | - | EGFR |
| cg25050026 | 3 | 158519410 | MFSD1        | - | EGFR |
| cg16334519 | 3 | 160395694 | ARL14        | - | EGFR |
| cg18919097 | 3 | 161090798 | SPTSSB       | - | EGFR |
| cg24777454 | 3 | 169529768 | LRRC34       | - | EGFR |
| cg04561804 | 3 | 169683976 | LOC100128164 | - | EGFR |
| cg11979312 | 3 | 172242713 | TNFSF10      | - | EGFR |
| cg06785429 | 3 | 182699414 | DCUN1D1      | - | EGFR |
| cg22356117 | 3 | 182881427 | LAMP3        | - | EGFR |
| cg25416014 | 3 | 183146809 | MCF2L2       | - | EGFR |
| cg20425130 | 3 | 183273245 | KLHL6        | - | EGFR |
| cg20398399 | 3 | 183273807 | KLHL6        | - | EGFR |
| cg03705396 | 3 | 183543680 | MAP6D1       | - | EGFR |
| cg24355091 | 3 | 183603136 | PARL         | - | EGFR |
| cg04200192 | 3 | 183749414 | HTR3D        | - | EGFR |
| cg18236734 | 3 | 183817931 | HTR3E        | - | EGFR |
| cg13461600 | 3 | 183903550 | ABCF3        | - | EGFR |
| cg25552889 | 3 | 184057683 | FAM131A      | - | EGFR |
| cg25636075 | 3 | 185217761 | TMEM41A      | - | EGFR |
| cg04458548 | 3 | 186356700 | FETUB        | - | EGFR |
| cg11504646 | 3 | 186913950 | RTP1         | - | EGFR |
| cg21909391 | 3 | 187896222 | FLJ42393     | - | EGFR |
| cg11984608 | 3 | 190105555 | CLDN16       | - | EGFR |
| cg26360732 | 3 | 195269834 | PPP1R2       | - | EGFR |
| cg03327494 | 3 | 195938048 | ZDHHC19      | - | EGFR |
| cg04283392 | 3 | 196366369 | NRROS        | - | EGFR |
| cg24693053 | 4 | 682834    | MFSD7        | - | EGFR |
| cg17952262 | 4 | 683240    | MFSD7        | - | EGFR |
| cg22362636 | 4 | 2758447   | TNIP2        | - | EGFR |
| cg14973995 | 4 | 2935692   | MFSD10       | - | EGFR |
| cg05209463 | 4 | 2935884   | MFSD10       | - | EGFR |
| cg25201363 | 4 | 3534845   | LRPAP1       | - | EGFR |
| cg04325632 | 4 | 3767073   | ADRA2C       | - | EGFR |
| cg20161179 | 4 | 4863282   | MSX1         | - | EGFR |
| cg22609784 | 4 | 4863678   | MSX1         | - | EGFR |
| cg03843978 | 4 | 4864625   | MSX1         | - | EGFR |
| cg15305511 | 4 | 5712676   | EVC          | - | EGFR |
| cg02883621 | 4 | 6694923   | S100P        | - | EGFR |
| cg14430151 | 4 | 8440600   | ACOX3        | - | EGFR |
| cg18059088 | 4 | 11430353  | HS3ST1       | - | EGFR |
| cg01462829 | 4 | 11430903  | HS3ST1       | - | EGFR |
| cg24829483 | 4 | 15341641  | C1QTNF7      | - | EGFR |
| cg06000781 | 4 | 15703606  | BST1         | - | EGFR |
| cg13929970 | 4 | 15939862  | FGFBP1       | - | EGFR |
| cg26689483 | 4 | 17513197  | QDPR         | - | EGFR |
| cg23337382 | 4 | 22517965  | GPR125       | - | EGFR |
| cg12435758 | 4 | 25032141  | LGI2         | - | EGFR |
| cg13359415 | 4 | 25032564  | LGI2         | - | EGFR |
| cg16370389 | 4 | 37962041  | PTTG2        | - | EGFR |
| cg01043831 | 4 | 37962205  | PTTG2        | - | EGFR |
| cg09963123 | 4 | 38664654  | KLF3         | - | EGFR |
| cg23855121 | 4 | 38784938  | TLR10        | - | EGFR |
| cg24438217 | 4 | 39980114  | PDS5A        | - | EGFR |
| cg00804392 | 4 | 40198595  | RHOH         | - | EGFR |
| cg11903057 | 4 | 40198776  | RHOH         | - | EGFR |
| cg01704534 | 4 | 40518024  | RBM47        | - | EGFR |
| cg07312445 | 4 | 40752151  | NSUN7        | - | EGFR |
| cg08319991 | 4 | 41259283  | UCHL1        | - | EGFR |
| cg04961553 | 4 | 48908469  | OCIAD2       | - | EGFR |
| cg21905630 | 4 | 54965904  | GSX2         | - | EGFR |
| cg22736323 | 4 | 55095529  | PDGFRA       | - | EGFR |
| cg05960024 | 4 | 56376020  | CLOCK        | - | EGFR |
| cg21621204 | 4 | 70916719  | HTN1         | - | EGFR |
| cg13546796 | 4 | 71108659  | CSN3         | - | EGFR |
| cg03970609 | 4 | 71337664  | MUC7         | - | EGFR |
| cg13523386 | 4 | 71457838  | AMBN         | - | EGFR |
| cg24748786 | 4 | 72203501  | SLC4A4       | - | EGFR |
| cg26125600 | 4 | 74718978  | PF4V1        | - | EGFR |
| cg20615832 | 4 | 74719172  | PF4V1        | - | EGFR |
| cg25806808 | 4 | 74734924  | CXCL1        | - | EGFR |
| cg04559909 | 4 | 74864725  | CXCL5        | - | EGFR |
| cg05641882 | 4 | 74904583  | CXCL3        | - | EGFR |
| cg16249454 | 4 | 74965075  | CXCL2        | - | EGFR |
| cg19308222 | 4 | 75230391  | EREG         | - | EGFR |
| cg04941721 | 4 | 75230901  | EREG         | - | EGFR |
| cg14724265 | 4 | 76823661  | PPEF2        | - | EGFR |
| cg22252999 | 4 | 76996414  | ART3         | - | EGFR |
| cg20430816 | 4 | 77228354  | STBD1        | - | EGFR |
| cg14898892 | 4 | 77356180  | SHROOM3      | - | EGFR |
| cg26365668 | 4 | 84375973  | HELQ         | - | EGFR |
| cg05890019 | 4 | 85886830  | WDFY3        | - | EGFR |
| cg17452384 | 4 | 87374237  | MAPK10       | - | EGFR |

|            |   |           |          |   |      |
|------------|---|-----------|----------|---|------|
| cg11277230 | 4 | 87813935  | C4orf36  | - | EGFR |
| cg18397653 | 4 | 88571653  | DMP1     | - | EGFR |
| cg20261167 | 4 | 88896942  | SPP1     | - | EGFR |
| cg24352530 | 4 | 89080423  | ABCG2    | - | EGFR |
| cg12554857 | 4 | 95264019  | HPGDS    | - | EGFR |
| cg25088874 | 4 | 95678817  | BMPR1B   | - | EGFR |
| cg06518271 | 4 | 100140325 | ADH6     | - | EGFR |
| cg26647453 | 4 | 100432162 | C4orf17  | - | EGFR |
| cg27019278 | 4 | 101438804 | EMCN     | - | EGFR |
| cg12532667 | 4 | 101440020 | EMCN     | - | EGFR |
| cg15299721 | 4 | 103997510 | SLC9B2   | - | EGFR |
| cg19428735 | 4 | 110748407 | RRH      | - | EGFR |
| cg13379236 | 4 | 110833808 | EGF      | - | EGFR |
| cg24818418 | 4 | 110834590 | EGF      | - | EGFR |
| cg10525488 | 4 | 113066439 | C4orf32  | - | EGFR |
| cg07790638 | 4 | 113508575 | C4orf21  | - | EGFR |
| cg17853587 | 4 | 118954386 | NDST3    | - | EGFR |
| cg06132694 | 4 | 118955172 | NDST3    | - | EGFR |
| cg21208104 | 4 | 119273361 | PRSS12   | - | EGFR |
| cg00415978 | 4 | 119809925 | SYNPO2   | - | EGFR |
| cg20288630 | 4 | 120550423 | PDE5A    | - | EGFR |
| cg03916421 | 4 | 130013461 | SCLT1    | - | EGFR |
| cg25546588 | 4 | 142557391 | IL15     | - | EGFR |
| cg06440646 | 4 | 146403418 | SMAD1    | - | EGFR |
| cg16264526 | 4 | 148401273 | EDNRA    | - | EGFR |
| cg08724517 | 4 | 156298204 | MAP9     | - | EGFR |
| cg08121954 | 4 | 156825203 | TDO2     | - | EGFR |
| cg09688546 | 4 | 157997363 | GLRB     | - | EGFR |
| cg26812418 | 4 | 166299976 | CPE      | - | EGFR |
| cg02886284 | 4 | 166300290 | CPE      | - | EGFR |
| cg01654582 | 4 | 171011577 | AADAT    | - | EGFR |
| cg14561282 | 4 | 175839468 | ADAM29   | - | EGFR |
| cg08493463 | 4 | 185139078 | ENPP6    | - | EGFR |
| cg23408620 | 4 | 187187495 | F11      | - | EGFR |
| cg06039392 | 4 | 187476953 | MTNR1A   | - | EGFR |
| cg20584011 | 5 | 851422    | ZDHHC11  | - | EGFR |
| cg23815306 | 5 | 891843    | BRD9     | - | EGFR |
| cg16935609 | 5 | 6632086   | NSUN2    | - | EGFR |
| cg11151820 | 5 | 10250162  | CCT5     | - | EGFR |
| cg11882252 | 5 | 10307634  | CMBL     | - | EGFR |
| cg08198480 | 5 | 17216222  | BASP1    | - | EGFR |
| cg08771731 | 5 | 17216434  | BASP1    | - | EGFR |
| cg22705225 | 5 | 31640216  | 0        | - | EGFR |
| cg13954292 | 5 | 32445523  | ZFR      | - | EGFR |
| cg06466479 | 5 | 34919428  | BRIX1    | - | EGFR |
| cg13880228 | 5 | 35230343  | PRLR     | - | EGFR |
| cg24202119 | 5 | 35938692  | CAPSL    | - | EGFR |
| cg15827031 | 5 | 37371628  | NUP155   | - | EGFR |
| cg26475085 | 5 | 38845600  | OSMR     | - | EGFR |
| cg03138091 | 5 | 38846540  | OSMR     | - | EGFR |
| cg03077492 | 5 | 43413095  | CCL28    | - | EGFR |
| cg15091410 | 5 | 55149500  | IL31RA   | - | EGFR |
| cg05992340 | 5 | 58882243  | PDE4D    | - | EGFR |
| cg13112511 | 5 | 58882753  | PDE4D    | - | EGFR |
| cg10506318 | 5 | 60239580  | ERCC8    | - | EGFR |
| cg03338064 | 5 | 61642377  | KIF2A    | - | EGFR |
| cg21993406 | 5 | 68484783  | CENPH    | - | EGFR |
| cg10770524 | 5 | 69141030  | 0        | - | EGFR |
| cg11332994 | 5 | 69345141  | SMN2     | - | EGFR |
| cg05095674 | 5 | 70363677  | GTF2H2   | - | EGFR |
| cg15518950 | 5 | 72415770  | TMEM171  | - | EGFR |
| cg20030243 | 5 | 76011643  | F2R      | - | EGFR |
| cg16545105 | 5 | 76248749  | CRHBP    | - | EGFR |
| cg04525496 | 5 | 82767526  | VCAN     | - | EGFR |
| cg09893305 | 5 | 83017184  | HAPLN1   | - | EGFR |
| cg10215884 | 5 | 87564247  | TMEM161B | - | EGFR |
| cg16625901 | 5 | 94013530  | ANKRD32  | - | EGFR |
| cg02320454 | 5 | 94956017  | GPR150   | - | EGFR |
| cg12628956 | 5 | 94982685  | RFESD    | - | EGFR |
| cg15230273 | 5 | 107006413 | EFNA5    | - | EGFR |
| cg16970232 | 5 | 112073433 | APC      | - | EGFR |
| cg20311501 | 5 | 112073502 | APC      | - | EGFR |
| cg24332422 | 5 | 112073686 | APC      | - | EGFR |
| cg15020645 | 5 | 112073769 | APC      | - | EGFR |
| cg07465864 | 5 | 112849162 | YTHDC2   | - | EGFR |
| cg09312149 | 5 | 114516420 | TRIM36   | - | EGFR |
| cg09486093 | 5 | 118787966 | HSD17B4  | - | EGFR |
| cg01824804 | 5 | 121413478 | LOX      | - | EGFR |
| cg08675664 | 5 | 125930870 | ALDH7A1  | - | EGFR |
| cg25842356 | 5 | 126367370 | 42432    | - | EGFR |
| cg19986872 | 5 | 131347773 | ACSL6    | - | EGFR |
| cg24117468 | 5 | 131562848 | P4HA2    | - | EGFR |
| cg21433933 | 5 | 132163083 | SHROOM1  | - | EGFR |
| cg11141561 | 5 | 134074404 | CAMLG    | - | EGFR |
| cg24495017 | 5 | 134370530 | PITX1    | - | EGFR |
| cg24585690 | 5 | 135231514 | IL9      | - | EGFR |
| cg21034676 | 5 | 135364552 | TGFB1    | - | EGFR |
| cg04956382 | 5 | 137203640 | MYOT     | - | EGFR |
| cg01936124 | 5 | 137878512 | ETF1     | - | EGFR |
| cg04270025 | 5 | 140579567 | PCDHB11  | - | EGFR |
| cg24435562 | 5 | 140593453 | PCDHB13  | - | EGFR |
| cg24385322 | 5 | 141017773 | RELL2    | - | EGFR |
| cg16382322 | 5 | 141061902 | ARAP3    | - | EGFR |
| cg13490971 | 5 | 141488121 | NDFIP1   | - | EGFR |
| cg08816023 | 5 | 142065539 | FGF1     | - | EGFR |

|            |   |           |              |   |      |
|------------|---|-----------|--------------|---|------|
| cg00834796 | 5 | 147161924 | JAKMIP2      | - | EGFR |
| cg19530885 | 5 | 147258132 | SCGB3A2      | - | EGFR |
| cg27488807 | 5 | 147691898 | SPINK7       | - | EGFR |
| cg14818279 | 5 | 148442554 | SH3TC2       | - | EGFR |
| cg25821963 | 5 | 148521171 | ABLM3        | - | EGFR |
| cg15467759 | 5 | 149900327 | NDST1        | - | EGFR |
| cg14600885 | 5 | 150040280 | MYOZ3        | - | EGFR |
| cg21504918 | 5 | 150400001 | GPX3         | - | EGFR |
| cg17820459 | 5 | 150400531 | GPX3         | - | EGFR |
| cg06746171 | 5 | 151138551 | ATOX1        | - | EGFR |
| cg20775840 | 5 | 151150431 | LOC100652758 | - | EGFR |
| cg26565838 | 5 | 153570764 | GALNT10      | - | EGFR |
| cg20492933 | 5 | 154320616 | MRPL22       | - | EGFR |
| cg18994063 | 5 | 156389699 | TIMD4        | - | EGFR |
| cg06200339 | 5 | 157079404 | SOX30        | - | EGFR |
| cg26775866 | 5 | 159849193 | PTTG1        | - | EGFR |
| cg02251134 | 5 | 169063563 | DOCK2        | - | EGFR |
| cg01495509 | 5 | 169816378 | KCNMB1       | - | EGFR |
| cg07293947 | 5 | 174905244 | SFXN1        | - | EGFR |
| cg08725962 | 5 | 175792493 | ARL10        | - | EGFR |
| cg22733478 | 5 | 176036806 | GPRIN1       | - | EGFR |
| cg06625767 | 5 | 176836695 | F12          | - | EGFR |
| cg22605063 | 5 | 176899801 | DBN1         | - | EGFR |
| cg02357714 | 5 | 176936563 | DOK3         | - | EGFR |
| cg21478490 | 5 | 177422991 | PROP1        | - | EGFR |
| cg09339527 | 5 | 178322752 | ZFP2         | - | EGFR |
| cg21169285 | 5 | 179707665 | MAPK9        | - | EGFR |
| cg25140370 | 6 | 391114    | IRF4         | - | EGFR |
| cg14115346 | 6 | 3118207   | BPHL         | - | EGFR |
| cg02212836 | 6 | 6589075   | LY86         | - | EGFR |
| cg02110963 | 6 | 10434975  | LINC00518    | - | EGFR |
| cg25151806 | 6 | 11045370  | ELOVL2-AS1   | - | EGFR |
| cg14178895 | 6 | 11778902  | ADTRP        | - | EGFR |
| cg10787197 | 6 | 11779941  | ADTRP        | - | EGFR |
| cg01769037 | 6 | 15246613  | JARID2       | - | EGFR |
| cg15210999 | 6 | 15663538  | DTNBP1       | - | EGFR |
| cg23207527 | 6 | 17283113  | RBM24        | - | EGFR |
| cg06682978 | 6 | 17394417  | CAP2         | - | EGFR |
| cg00586909 | 6 | 20534671  | CDKAL1       | - | EGFR |
| cg14023451 | 6 | 24489887  | GPLD1        | - | EGFR |
| cg25375764 | 6 | 24494665  | ALDH5A1      | - | EGFR |
| cg16381688 | 6 | 24665947  | TDP2         | - | EGFR |
| cg21627181 | 6 | 25754190  | SLC17A4      | - | EGFR |
| cg15916061 | 6 | 25754219  | SLC17A4      | - | EGFR |
| cg22502502 | 6 | 25962567  | TRIM38       | - | EGFR |
| cg25438963 | 6 | 26045663  | HIST1H3C     | - | EGFR |
| cg26741595 | 6 | 26158391  | HIST1H2BD    | - | EGFR |
| cg10046620 | 6 | 27775042  | HIST1H2AI    | - | EGFR |
| cg03821311 | 6 | 27836018  | HIST1H1B     | - | EGFR |
| cg21750589 | 6 | 28321301  | ZKSCAN3      | - | EGFR |
| cg20879959 | 6 | 29910208  | HLA-A        | - | EGFR |
| cg17475918 | 6 | 30457237  | HLA-E        | - | EGFR |
| cg04824716 | 6 | 31125475  | CCHCR1       | - | EGFR |
| cg15765212 | 6 | 31589161  | PRRC2A       | - | EGFR |
| cg14341418 | 6 | 31624284  | APOM         | - | EGFR |
| cg01578324 | 6 | 31704774  | CLIC1        | - | EGFR |
| cg07363637 | 6 | 31846996  | SLC44A4      | - | EGFR |
| cg04498679 | 6 | 31895598  | C2           | - | EGFR |
| cg09583599 | 6 | 31925920  | SKIV2L       | - | EGFR |
| cg11847949 | 6 | 32006021  | CYP21A2      | - | EGFR |
| cg25426302 | 6 | 32120826  | PPT2         | - | EGFR |
| cg17329164 | 6 | 32121259  | PPT2         | - | EGFR |
| cg12585943 | 6 | 32121368  | PPT2         | - | EGFR |
| cg13910855 | 6 | 32157485  | PBX2         | - | EGFR |
| cg14700707 | 6 | 32191840  | NOTCH4       | - | EGFR |
| cg07294541 | 6 | 35265555  | DEF6         | - | EGFR |
| cg14960043 | 6 | 35265624  | DEF6         | - | EGFR |
| cg26823505 | 6 | 35765589  | CLPS         | - | EGFR |
| cg23807646 | 6 | 35992685  | SLC26A8      | - | EGFR |
| cg21716693 | 6 | 36806882  | CPNE5        | - | EGFR |
| cg24760768 | 6 | 38690878  | DNAH8        | - | EGFR |
| cg22375610 | 6 | 41021161  | APOBEC2      | - | EGFR |
| cg01564343 | 6 | 41121920  | TREML1       | - | EGFR |
| cg04454050 | 6 | 41122081  | TREML1       | - | EGFR |
| cg01980222 | 6 | 41130917  | TREM2        | - | EGFR |
| cg12855851 | 6 | 41715185  | PGC          | - | EGFR |
| cg21690892 | 6 | 42162428  | GUCA1B       | - | EGFR |
| cg19839588 | 6 | 42419466  | TRERF1       | - | EGFR |
| cg01125463 | 6 | 42946178  | PEX6         | - | EGFR |
| cg07076342 | 6 | 42981435  | MEA1         | - | EGFR |
| cg07099407 | 6 | 43027930  | KLC4         | - | EGFR |
| cg21663580 | 6 | 43044771  | PTK7         | - | EGFR |
| cg13097407 | 6 | 43276658  | CRIP3        | - | EGFR |
| cg01708236 | 6 | 44233446  | NFKBIE       | - | EGFR |
| cg20980592 | 6 | 46761035  | MEP1A        | - | EGFR |
| cg16019620 | 6 | 46761090  | MEP1A        | - | EGFR |
| cg15002204 | 6 | 49429719  | MUT          | - | EGFR |
| cg20337106 | 6 | 49429845  | MUT          | - | EGFR |
| cg16267266 | 6 | 52109232  | IL17F        | - | EGFR |
| cg25567232 | 6 | 52710314  | GSTA5        | - | EGFR |
| cg15178040 | 6 | 52711494  | GSTA5        | - | EGFR |
| cg26023389 | 6 | 53013589  | GCM1         | - | EGFR |
| cg20967220 | 6 | 53013647  | GCM1         | - | EGFR |
| cg08302713 | 6 | 53409850  | GCLC         | - | EGFR |
| cg12368241 | 6 | 64355267  | PHF3         | - | EGFR |

|            |   |           |          |   |      |
|------------|---|-----------|----------|---|------|
| cg18887228 | 6 | 64356606  | PHF3     | - | EGFR |
| cg14579051 | 6 | 71012852  | COL9A1   | - | EGFR |
| cg18403396 | 6 | 71666282  | B3GAT2   | - | EGFR |
| cg09527362 | 6 | 74162142  | MB21D1   | - | EGFR |
| cg23442323 | 6 | 74406189  | CD109    | - | EGFR |
| cg26780404 | 6 | 75915840  | COL12A1  | - | EGFR |
| cg12216205 | 6 | 99863810  | PNISR    | - | EGFR |
| cg05874450 | 6 | 105627246 | POPDC3   | - | EGFR |
| cg23978557 | 6 | 109760819 | SMPD2    | - | EGFR |
| cg20811607 | 6 | 109760831 | SMPD2    | - | EGFR |
| cg15822346 | 6 | 111408761 | SLC16A10 | - | EGFR |
| cg05564266 | 6 | 118973597 | CEP85L   | - | EGFR |
| cg15897310 | 6 | 132272560 | CTGF     | - | EGFR |
| cg15582891 | 6 | 132967028 | TAAR1    | - | EGFR |
| cg17836145 | 6 | 133084642 | VNN2     | - | EGFR |
| cg10771262 | 6 | 134209980 | TCF21    | - | EGFR |
| cg22030890 | 6 | 146865233 | RAB32    | - | EGFR |
| cg09381701 | 6 | 148663829 | SASH1    | - | EGFR |
| cg20416179 | 6 | 150690143 | IYD      | - | EGFR |
| cg07671949 | 6 | 152128338 | ESR1     | - | EGFR |
| cg24317255 | 6 | 153452233 | RGS17    | - | EGFR |
| cg20925955 | 6 | 155412182 | TIAM2    | - | EGFR |
| cg21792737 | 6 | 155776999 | NOX3     | - | EGFR |
| cg20179697 | 6 | 158243607 | SNX9     | - | EGFR |
| cg06479512 | 6 | 160221164 | PNLDC1   | - | EGFR |
| cg15398520 | 6 | 160932709 | LPAL2    | - | EGFR |
| cg17001430 | 6 | 168418276 | KIF25    | - | EGFR |
| cg11442717 | 6 | 170125241 | PHF10    | - | EGFR |
| cg24710073 | 6 | 170864351 | TBP      | - | EGFR |
| cg16127845 | 7 | 1126423   | GPFR     | - | EGFR |
| cg14480463 | 7 | 1543435   | INTS1    | - | EGFR |
| cg19778698 | 7 | 1570060   | MAFK     | - | EGFR |
| cg24743283 | 7 | 2884365   | GNA12    | - | EGFR |
| cg26937500 | 7 | 3083338   | CARD11   | - | EGFR |
| cg12838902 | 7 | 5322586   | SLC29A4  | - | EGFR |
| cg06666486 | 7 | 6099044   | EIF2AK1  | - | EGFR |
| cg03930970 | 7 | 6618160   | ZDHHC4   | - | EGFR |
| cg10798171 | 7 | 8302301   | ICA1     | - | EGFR |
| cg00911873 | 7 | 18067463  | PRPS1L1  | - | EGFR |
| cg08285151 | 7 | 18534872  | HDAC9    | - | EGFR |
| cg01182585 | 7 | 23338735  | MALSU1   | - | EGFR |
| cg19042950 | 7 | 23509770  | IGF2BP3  | - | EGFR |
| cg04108240 | 7 | 23572665  | TRA2A    | - | EGFR |
| cg04770504 | 7 | 24797363  | DFNA5    | - | EGFR |
| cg14534464 | 7 | 26191633  | NFE2L3   | - | EGFR |
| cg26179948 | 7 | 28220645  | JAZF1    | - | EGFR |
| cg12658982 | 7 | 29603541  | PRR15    | - | EGFR |
| cg23216015 | 7 | 31726654  | PPP1R17  | - | EGFR |
| cg06506864 | 7 | 34698188  | NPSR1    | - | EGFR |
| cg10806140 | 7 | 37956554  | SFRP4    | - | EGFR |
| cg16433922 | 7 | 37956704  | SFRP4    | - | EGFR |
| cg04748010 | 7 | 39046213  | POU6F2   | - | EGFR |
| cg16415646 | 7 | 41743001  | INHBA    | - | EGFR |
| cg22805517 | 7 | 42951105  | C7orf25  | - | EGFR |
| cg21070087 | 7 | 43351538  | HECW1    | - | EGFR |
| cg17479357 | 7 | 43769596  | COA1     | - | EGFR |
| cg15001372 | 7 | 44229892  | GCK      | - | EGFR |
| cg11609344 | 7 | 44240862  | YKT6     | - | EGFR |
| cg17754680 | 7 | 44581831  | NPC1L1   | - | EGFR |
| cg27447599 | 7 | 45927940  | IGFBP1   | - | EGFR |
| cg06713098 | 7 | 45960367  | IGFBP3   | - | EGFR |
| cg25915982 | 7 | 50849415  | GRB10    | - | EGFR |
| cg09163442 | 7 | 54827431  | SEC61G   | - | EGFR |
| cg00945507 | 7 | 54827677  | SEC61G   | - | EGFR |
| cg07619076 | 7 | 55433148  | LANCL2   | - | EGFR |
| cg18219226 | 7 | 65447622  | GUSB     | - | EGFR |
| cg08472583 | 7 | 65580288  | CRCP     | - | EGFR |
| cg14702264 | 7 | 66385829  | TMEM248  | - | EGFR |
| cg07737781 | 7 | 73038866  | MLXIPL   | - | EGFR |
| cg05146762 | 7 | 73868174  | GTF2IRD1 | - | EGFR |
| cg20748065 | 7 | 75583421  | POR      | - | EGFR |
| cg06772202 | 7 | 75678527  | MDH2     | - | EGFR |
| cg01430430 | 7 | 75914313  | SRRM3    | - | EGFR |
| cg27268486 | 7 | 79764291  | GNAI1    | - | EGFR |
| cg11051843 | 7 | 80548695  | SEMA3C   | - | EGFR |
| cg18464137 | 7 | 83278504  | SEMA3E   | - | EGFR |
| cg25225238 | 7 | 86272973  | GRM3     | - | EGFR |
| cg15350036 | 7 | 86973677  | TP53TG1  | - | EGFR |
| cg27626102 | 7 | 89840731  | STEAP2   | - | EGFR |
| cg23283875 | 7 | 89874597  | C7orf63  | - | EGFR |
| cg08871917 | 7 | 92076509  | GATAD1   | - | EGFR |
| cg21736205 | 7 | 92100314  | 0        | - | EGFR |
| cg11608424 | 7 | 92849851  | HEPACAM2 | - | EGFR |
| cg14377593 | 7 | 93520183  | TFPI2    | - | EGFR |
| cg25524350 | 7 | 94284893  | SGCE     | - | EGFR |
| cg09375488 | 7 | 95115026  | ASB4     | - | EGFR |
| cg22152667 | 7 | 97619372  | OCM2     | - | EGFR |
| cg13364756 | 7 | 99425193  | CYP3A43  | - | EGFR |
| cg19370284 | 7 | 99647006  | ZSCAN21  | - | EGFR |
| cg00929606 | 7 | 99680280  | ZNF3     | - | EGFR |
| cg00702729 | 7 | 99757654  | C7orf43  | - | EGFR |
| cg13650156 | 7 | 99970502  | PILRA    | - | EGFR |
| cg06762858 | 7 | 99971256  | PILRA    | - | EGFR |
| cg20500081 | 7 | 100185177 | FBXO24   | - | EGFR |
| cg26777475 | 7 | 100199952 | PCOLCE   | - | EGFR |

|            |   |           |           |   |      |
|------------|---|-----------|-----------|---|------|
| cg02797569 | 7 | 100200009 | PCOLCE    | - | EGFR |
| cg11673969 | 7 | 100424945 | EPHB4     | - | EGFR |
| cg16462075 | 7 | 100544220 | 0         | - | EGFR |
| cg16880396 | 7 | 101928206 | SH2B2     | - | EGFR |
| cg05253159 | 7 | 101928560 | SH2B2     | - | EGFR |
| cg08779777 | 7 | 106505772 | PIK3CG    | - | EGFR |
| cg10064162 | 7 | 107644249 | LAMB1     | - | EGFR |
| cg13383491 | 7 | 112727701 | GPR85     | - | EGFR |
| cg21880328 | 7 | 117514017 | CTTNBP2   | - | EGFR |
| cg25167643 | 7 | 121513538 | PTPRZ1    | - | EGFR |
| cg10569616 | 7 | 124536676 | POT1      | - | EGFR |
| cg15802323 | 7 | 127228142 | ARF5      | - | EGFR |
| cg00315936 | 7 | 127292739 | SND1      | - | EGFR |
| cg27263448 | 7 | 127637871 | SND1-IT1  | - | EGFR |
| cg15447479 | 7 | 128828765 | SMO       | - | EGFR |
| cg20633959 | 7 | 129250987 | NRF1      | - | EGFR |
| cg06422910 | 7 | 130352926 | COPG2     | - | EGFR |
| cg17356112 | 7 | 132334710 | FLJ40288  | - | EGFR |
| cg10725344 | 7 | 135433639 | FAM180A   | - | EGFR |
| cg00653387 | 7 | 137028535 | PTN       | - | EGFR |
| cg05719902 | 7 | 138348774 | SVOPL     | - | EGFR |
| cg02491878 | 7 | 138482580 | TMEM213   | - | EGFR |
| cg09848074 | 7 | 139172610 | 0         | - | EGFR |
| cg24890286 | 7 | 139317303 | HIPK2     | - | EGFR |
| cg16752583 | 7 | 142583731 | TRPV6     | - | EGFR |
| cg02774963 | 7 | 142659757 | KEL       | - | EGFR |
| cg15652212 | 7 | 142981776 | TMEM139   | - | EGFR |
| cg08261841 | 7 | 142982463 | TMEM139   | - | EGFR |
| cg17922226 | 7 | 143013614 | CLCN1     | - | EGFR |
| cg26866014 | 7 | 148287712 | C7orf33   | - | EGFR |
| cg02401978 | 7 | 149195465 | ZNF746    | - | EGFR |
| cg01227741 | 7 | 150211179 | GIMAP7    | - | EGFR |
| cg20663831 | 7 | 150383154 | GIMAP2    | - | EGFR |
| cg22442090 | 7 | 150434077 | GIMAP5    | - | EGFR |
| cg13289321 | 7 | 150884003 | ASB10     | - | EGFR |
| cg15146720 | 7 | 151722621 | GALNT11   | - | EGFR |
| cg23126915 | 7 | 152374317 | XRCC2     | - | EGFR |
| cg13434842 | 8 | 11567896  | GATA4     | - | EGFR |
| cg14501253 | 8 | 12809014  | KIAA1456  | - | EGFR |
| cg17509872 | 8 | 17105487  | VPS37A    | - | EGFR |
| cg06093279 | 8 | 17658292  | MTUS1     | - | EGFR |
| cg22708914 | 8 | 19170890  | SH2D4A    | - | EGFR |
| cg22441882 | 8 | 20040654  | SLC18A1   | - | EGFR |
| cg26917999 | 8 | 20112890  | LZTS1     | - | EGFR |
| cg26411702 | 8 | 21881998  | NPM2      | - | EGFR |
| cg07242414 | 8 | 22021845  | BMP1      | - | EGFR |
| cg07059360 | 8 | 22102032  | POLR3D    | - | EGFR |
| cg05698069 | 8 | 22436246  | PDLIM2    | - | EGFR |
| cg16175263 | 8 | 22960385  | TNFRSF10C | - | EGFR |
| cg01407244 | 8 | 22961007  | TNFRSF10C | - | EGFR |
| cg05365729 | 8 | 23262073  | LOXL2     | - | EGFR |
| cg10207787 | 8 | 26148195  | PPP2R2A   | - | EGFR |
| cg25762706 | 8 | 27115867  | STMN4     | - | EGFR |
| cg24081819 | 8 | 27348940  | EPHX2     | - | EGFR |
| cg19549068 | 8 | 27472319  | CLU       | - | EGFR |
| cg00987379 | 8 | 28244386  | ZNF395    | - | EGFR |
| cg18508125 | 8 | 28347573  | FBXO16    | - | EGFR |
| cg11710000 | 8 | 28352559  | FZD3      | - | EGFR |
| cg07267296 | 8 | 28748995  | HMBOX1    | - | EGFR |
| cg00459975 | 8 | 28749099  | HMBOX1    | - | EGFR |
| cg13490635 | 8 | 30242021  | RBPM5     | - | EGFR |
| cg09990086 | 8 | 38643846  | TACC1     | - | EGFR |
| cg12535715 | 8 | 38831693  | HTRA4     | - | EGFR |
| cg00176210 | 8 | 41654967  | ANK1      | - | EGFR |
| cg22038738 | 8 | 42064673  | PLAT      | - | EGFR |
| cg01762581 | 8 | 42234614  | DKK4      | - | EGFR |
| cg00367281 | 8 | 42552470  | CHRNA3    | - | EGFR |
| cg17145652 | 8 | 42750650  | RNF170    | - | EGFR |
| cg12010995 | 8 | 59413152  | CYP7A1    | - | EGFR |
| cg23602533 | 8 | 63998164  | TTPA      | - | EGFR |
| cg13760253 | 8 | 66932700  | DNAJC5B   | - | EGFR |
| cg02067021 | 8 | 66934027  | DNAJC5B   | - | EGFR |
| cg01086978 | 8 | 68255088  | ARFGEF1   | - | EGFR |
| cg13043862 | 8 | 72274598  | EYA1      | - | EGFR |
| cg03991326 | 8 | 74205489  | RPL7      | - | EGFR |
| cg18459342 | 8 | 81084056  | TPD52     | - | EGFR |
| cg11726593 | 8 | 82598801  | IMPA1     | - | EGFR |
| cg15170424 | 8 | 92052897  | TMEM55A   | - | EGFR |
| cg06688396 | 8 | 92053433  | TMEM55A   | - | EGFR |
| cg26596161 | 8 | 92261459  | SLC26A7   | - | EGFR |
| cg14346035 | 8 | 94928406  | MIR378D2  | - | EGFR |
| cg22313024 | 8 | 97248069  | UQCRB     | - | EGFR |
| cg16177163 | 8 | 97272787  | MTERFD1   | - | EGFR |
| cg01892689 | 8 | 97657072  | CPQ       | - | EGFR |
| cg00186701 | 8 | 98290510  | TSPYL5    | - | EGFR |
| cg15264255 | 8 | 99306718  | NIPAL2    | - | EGFR |
| cg17199658 | 8 | 101661478 | SNX31     | - | EGFR |
| cg11318251 | 8 | 104152588 | BAALC     | - | EGFR |
| cg07005767 | 8 | 107782538 | ABRA      | - | EGFR |
| cg09396217 | 8 | 108510286 | ANGPT1    | - | EGFR |
| cg05040429 | 8 | 119633844 | SAMD12    | - | EGFR |
| cg16907566 | 8 | 121136534 | COL14A1   | - | EGFR |
| cg07109670 | 8 | 124085299 | TBC1D31   | - | EGFR |
| cg00283535 | 8 | 124749564 | ANXA13    | - | EGFR |
| cg20283107 | 8 | 124788969 | FAM91A1   | - | EGFR |

|            |   |           |            |   |      |
|------------|---|-----------|------------|---|------|
| cg18939260 | 8 | 125741346 | MTSS1      | - | EGFR |
| cg13052755 | 8 | 128805589 | 0          | - | EGFR |
| cg00077877 | 8 | 131414474 | ASAP1      | - | EGFR |
| cg23427666 | 8 | 133880105 | TG         | - | EGFR |
| cg09102409 | 8 | 134308734 | NDRG1      | - | EGFR |
| cg03396229 | 8 | 139926571 | COL22A1    | - | EGFR |
| cg16425577 | 8 | 142139654 | DENND3     | - | EGFR |
| cg21210789 | 8 | 143545390 | BAI1       | - | EGFR |
| cg13446199 | 8 | 143762866 | PSCA       | - | EGFR |
| cg03773789 | 8 | 144348945 | GLI4       | - | EGFR |
| cg14292823 | 8 | 144681097 | TIGD5      | - | EGFR |
| cg23902550 | 8 | 144681106 | TIGD5      | - | EGFR |
| cg12089698 | 8 | 145086882 | SPATC1     | - | EGFR |
| cg08020051 | 8 | 145137133 | GPAA1      | - | EGFR |
| cg25027167 | 8 | 145551031 | DGAT1      | - | EGFR |
| cg21959619 | 8 | 145581006 | FBXL6      | - | EGFR |
| cg15783027 | 8 | 145669353 | TONSL      | - | EGFR |
| cg20845050 | 8 | 146053666 | ZNF7       | - | EGFR |
| cg05523047 | 9 | 2621379   | VLDLR      | - | EGFR |
| cg20394284 | 9 | 4984206   | JAK2       | - | EGFR |
| cg14440664 | 9 | 5509642   | PDCD1LG2   | - | EGFR |
| cg18043828 | 9 | 12774985  | LURAP1L    | - | EGFR |
| cg01446692 | 9 | 14723496  | CER1       | - | EGFR |
| cg25822709 | 9 | 19048850  | RRAGA      | - | EGFR |
| cg08390209 | 9 | 22005563  | CDKN2B     | - | EGFR |
| cg18979223 | 9 | 22005769  | CDKN2B     | - | EGFR |
| cg06421800 | 9 | 22006228  | CDKN2B     | - | EGFR |
| cg05779272 | 9 | 33168018  | B4GALT1    | - | EGFR |
| cg04103317 | 9 | 33240960  | SPINK4     | - | EGFR |
| cg26624914 | 9 | 33448382  | AQP3       | - | EGFR |
| cg10720654 | 9 | 33676517  | PTENP1-AS  | - | EGFR |
| cg12687990 | 9 | 33677449  | PTENP1     | - | EGFR |
| cg05413282 | 9 | 33796088  | PRSS3      | - | EGFR |
| cg05208153 | 9 | 34398637  | C9orf24    | - | EGFR |
| cg12188560 | 9 | 34591192  | CNTFR      | - | EGFR |
| cg16480145 | 9 | 35489718  | RUSC2      | - | EGFR |
| cg15271616 | 9 | 35490515  | RUSC2      | - | EGFR |
| cg19257550 | 9 | 35673909  | CA9        | - | EGFR |
| cg24070292 | 9 | 35689808  | TPM2       | - | EGFR |
| cg17691309 | 9 | 35690459  | TPM2       | - | EGFR |
| cg00833393 | 9 | 35731638  | CREB3      | - | EGFR |
| cg20870362 | 9 | 36169175  | CCIN       | - | EGFR |
| cg08289932 | 9 | 38068663  | SHB        | - | EGFR |
| cg05174079 | 9 | 67786742  | FAM27E3    | - | EGFR |
| cg09230173 | 9 | 70971359  | PGM5       | - | EGFR |
| cg00842351 | 9 | 71789653  | TJP2       | - | EGFR |
| cg26535072 | 9 | 72288156  | APBA1      | - | EGFR |
| cg11558474 | 9 | 74382743  | TMEM2      | - | EGFR |
| cg02654291 | 9 | 86572014  | C9orf64    | - | EGFR |
| cg13814950 | 9 | 90112515  | DAPK1      | - | EGFR |
| cg10645113 | 9 | 91979776  | SEMA4D     | - | EGFR |
| cg10025443 | 9 | 93564339  | SYK        | - | EGFR |
| cg01197831 | 9 | 97355941  | FBP2       | - | EGFR |
| cg14633704 | 9 | 99065350  | HSD17B3    | - | EGFR |
| cg20811389 | 9 | 99381113  | CDC14B     | - | EGFR |
| cg11516606 | 9 | 100175029 | TDRD7      | - | EGFR |
| cg22775000 | 9 | 103235181 | TMEFF1     | - | EGFR |
| cg03939688 | 9 | 110251706 | KLF4       | - | EGFR |
| cg07309102 | 9 | 110251826 | KLF4       | - | EGFR |
| cg19863405 | 9 | 111619070 | ACTL7B     | - | EGFR |
| cg00065385 | 9 | 111623395 | ACTL7A     | - | EGFR |
| cg25018881 | 9 | 111697645 | FAM206A    | - | EGFR |
| cg15083233 | 9 | 112810402 | AKAP2      | - | EGFR |
| cg04230060 | 9 | 114937992 | SUSD1      | - | EGFR |
| cg07758904 | 9 | 115652824 | SLC46A2    | - | EGFR |
| cg05706061 | 9 | 115912974 | SLC31A2    | - | EGFR |
| cg25420952 | 9 | 116841084 | AMBP       | - | EGFR |
| cg12927617 | 9 | 117084602 | ORM1       | - | EGFR |
| cg02515422 | 9 | 120466493 | TLR4       | - | EGFR |
| cg21152671 | 9 | 123690586 | TRAF1      | - | EGFR |
| cg13060154 | 9 | 124461998 | DAB2IP     | - | EGFR |
| cg04655481 | 9 | 125796809 | GPR21      | - | EGFR |
| cg04784315 | 9 | 125797284 | GPR21      | - | EGFR |
| cg02010852 | 9 | 126118355 | CRB2       | - | EGFR |
| cg24412846 | 9 | 127702670 | GOLGA1     | - | EGFR |
| cg16284292 | 9 | 129567924 | ZBTB43     | - | EGFR |
| cg05840553 | 9 | 130212635 | RPL12      | - | EGFR |
| cg24545967 | 9 | 130540941 | SH2D3C     | - | EGFR |
| cg08999352 | 9 | 130547210 | MIR3960    | - | EGFR |
| cg04460372 | 9 | 130661175 | ST6GALNAC6 | - | EGFR |
| cg04416752 | 9 | 130679027 | ST6GALNAC4 | - | EGFR |
| cg06765514 | 9 | 130689862 | PIP5KL1    | - | EGFR |
| cg23006204 | 9 | 130700866 | DPM2       | - | EGFR |
| cg05826823 | 9 | 130968072 | CIZ1       | - | EGFR |
| cg13022129 | 9 | 131683862 | PHYHD1     | - | EGFR |
| cg26672426 | 9 | 132514582 | PTGES      | - | EGFR |
| cg24475171 | 9 | 132598886 | USP20      | - | EGFR |
| cg22791453 | 9 | 133319899 | ASS1       | - | EGFR |
| cg18986964 | 9 | 133589320 | ABL1       | - | EGFR |
| cg03924115 | 9 | 133768966 | QRFP       | - | EGFR |
| cg03900284 | 9 | 133769695 | QRFP       | - | EGFR |
| cg01909921 | 9 | 135854246 | GFI1B      | - | EGFR |
| cg11879188 | 9 | 136149908 | ABO        | - | EGFR |
| cg07241568 | 9 | 136150823 | ABO        | - | EGFR |
| cg22244122 | 9 | 136243698 | C9orf96    | - | EGFR |

|            |    |           |          |   |      |
|------------|----|-----------|----------|---|------|
| cg26224139 | 9  | 138393760 | MRPS2    | - | EGFR |
| cg01055695 | 9  | 138452950 | PAEP     | - | EGFR |
| cg02516189 | 9  | 139268092 | CARD9    | - | EGFR |
| cg24812167 | 9  | 139293358 | SNAPC4   | - | EGFR |
| cg16536450 | 9  | 139658896 | LCN15    | - | EGFR |
| cg26581729 | 9  | 139939792 | NPDC1    | - | EGFR |
| cg15396367 | 9  | 139972779 | UAP1L1   | - | EGFR |
| cg22336401 | 9  | 140336227 | ENTPD8   | - | EGFR |
| cg01036012 | 10 | 95127     | TUBB8    | - | EGFR |
| cg26675077 | 10 | 95398     | TUBB8    | - | EGFR |
| cg00471562 | 10 | 1102373   | WDR37    | - | EGFR |
| cg03475172 | 10 | 11654177  | USP6NL   | - | EGFR |
| cg02630694 | 10 | 12236833  | CDC123   | - | EGFR |
| cg12042678 | 10 | 14920910  | SUV39H2  | - | EGFR |
| cg19856444 | 10 | 18241116  | SLC39A12 | - | EGFR |
| cg24625388 | 10 | 21463858  | NEBL     | - | EGFR |
| cg17431739 | 10 | 23384047  | MSRB2    | - | EGFR |
| cg08555772 | 10 | 28287707  | ARMC4    | - | EGFR |
| cg25104030 | 10 | 43761841  | RASGEF1A | - | EGFR |
| cg04444771 | 10 | 45473712  | C10orf10 | - | EGFR |
| cg00899659 | 10 | 45495971  | ZNF22    | - | EGFR |
| cg18809289 | 10 | 45869816  | ALOX5    | - | EGFR |
| cg01982597 | 10 | 50733420  | PGBD3    | - | EGFR |
| cg05250673 | 10 | 60027547  | IPMK     | - | EGFR |
| cg22150335 | 10 | 62148959  | ANK3     | - | EGFR |
| cg13320683 | 10 | 62761819  | RHOBTB1  | - | EGFR |
| cg27208307 | 10 | 70847399  | SRGN     | - | EGFR |
| cg11639651 | 10 | 70979811  | HKDC1    | - | EGFR |
| cg11762346 | 10 | 70980112  | HKDC1    | - | EGFR |
| cg06323290 | 10 | 71029879  | HK1      | - | EGFR |
| cg04377282 | 10 | 72201417  | NODAL    | - | EGFR |
| cg01078276 | 10 | 75670677  | PLAU     | - | EGFR |
| cg17238009 | 10 | 77542582  | C10orf11 | - | EGFR |
| cg27352063 | 10 | 81107211  | PPIF     | - | EGFR |
| cg23706422 | 10 | 89420014  | PAPSS2   | - | EGFR |
| cg21480743 | 10 | 89621419  | KLLN     | - | EGFR |
| cg17001035 | 10 | 92980059  | PCGF5    | - | EGFR |
| cg14613832 | 10 | 94833615  | CYP26A1  | - | EGFR |
| cg19166875 | 10 | 95241944  | MYOF     | - | EGFR |
| cg05835416 | 10 | 96442674  | CYP2C18  | - | EGFR |
| cg04451770 | 10 | 97515372  | ENTPD1   | - | EGFR |
| cg09773756 | 10 | 99259519  | UBTD1    | - | EGFR |
| cg09542745 | 10 | 99531164  | SFRP5    | - | EGFR |
| cg26109803 | 10 | 102222798 | WNT8B    | - | EGFR |
| cg13449372 | 10 | 102748693 | C10orf2  | - | EGFR |
| cg00431050 | 10 | 103985730 | ELOVL3   | - | EGFR |
| cg22882178 | 10 | 104001226 | PITX3    | - | EGFR |
| cg14681055 | 10 | 104001261 | PITX3    | - | EGFR |
| cg01275830 | 10 | 104211749 | C10orf95 | - | EGFR |
| cg10872209 | 10 | 104475308 | SFXN2    | - | EGFR |
| cg18151487 | 10 | 104475340 | SFXN2    | - | EGFR |
| cg09201719 | 10 | 104596890 | CYP17A1  | - | EGFR |
| cg20925954 | 10 | 112256640 | DUSP5    | - | EGFR |
| cg11152574 | 10 | 114134550 | ACSL5    | - | EGFR |
| cg11310496 | 10 | 118380175 | PNLIPRP2 | - | EGFR |
| cg14916079 | 10 | 120788696 | NANOS1   | - | EGFR |
| cg14924278 | 10 | 123748922 | TACC2    | - | EGFR |
| cg11676599 | 10 | 124133934 | PLEKHA1  | - | EGFR |
| cg25475443 | 10 | 125806388 | CHST15   | - | EGFR |
| cg04233664 | 10 | 126848743 | CTBP2    | - | EGFR |
| cg05942970 | 10 | 133955527 | JAKMIP3  | - | EGFR |
| cg01757745 | 10 | 134755601 | TTC40    | - | EGFR |
| cg03366896 | 10 | 135186866 | ECHS1    | - | EGFR |
| cg18361093 | 10 | 135193212 | PAOX     | - | EGFR |
| cg22289115 | 11 | 625796    | CDHR5    | - | EGFR |
| cg01485797 | 11 | 810820    | SNORA52  | - | EGFR |
| cg15659828 | 11 | 911673    | CHID1    | - | EGFR |
| cg22407504 | 11 | 1243090   | MUC5B    | - | EGFR |
| cg11492040 | 11 | 2016513   | H19      | - | EGFR |
| cg25852472 | 11 | 2017664   | H19      | - | EGFR |
| cg21167159 | 11 | 2018154   | MIR675   | - | EGFR |
| cg13145013 | 11 | 2018205   | MIR675   | - | EGFR |
| cg15317267 | 11 | 2018247   | MIR675   | - | EGFR |
| cg07342901 | 11 | 2018724   | H19      | - | EGFR |
| cg02657360 | 11 | 2020560   | H19      | - | EGFR |
| cg02807948 | 11 | 2153991   | IGF2     | - | EGFR |
| cg20392764 | 11 | 2293117   | ASCL2    | - | EGFR |
| cg01734338 | 11 | 2491231   | KCNQ1    | - | EGFR |
| cg27491887 | 11 | 2554583   | KCNQ1    | - | EGFR |
| cg16609872 | 11 | 2828364   | KCNQ1    | - | EGFR |
| cg05656180 | 11 | 2890258   | KCNQ1DN  | - | EGFR |
| cg13081704 | 11 | 2890457   | KCNQ1DN  | - | EGFR |
| cg01530101 | 11 | 2891098   | KCNQ1DN  | - | EGFR |
| cg09998591 | 11 | 2891402   | KCNQ1DN  | - | EGFR |
| cg10503232 | 11 | 2891495   | KCNQ1DN  | - | EGFR |
| cg17738133 | 11 | 2907059   | CDKN1C   | - | EGFR |
| cg06131936 | 11 | 3187271   | OSBPL5   | - | EGFR |
| cg05628549 | 11 | 6341895   | PRKCDBP  | - | EGFR |
| cg15741583 | 11 | 6461908   | HPX      | - | EGFR |
| cg16998353 | 11 | 6495553   | TRIM3    | - | EGFR |
| cg27560292 | 11 | 6632884   | TAF10    | - | EGFR |
| cg22867063 | 11 | 7041549   | ZNF214   | - | EGFR |
| cg19447966 | 11 | 12785773  | TEAD1    | - | EGFR |
| cg03860400 | 11 | 13485289  | BTBD10   | - | EGFR |
| cg05592434 | 11 | 17098772  | RPS13    | - | EGFR |

|            |    |           |                |   |      |
|------------|----|-----------|----------------|---|------|
| cg05185584 | 11 | 17410182  | KCNJ11         | - | EGFR |
| cg13185308 | 11 | 17498819  | ABCC8          | - | EGFR |
| cg22587758 | 11 | 18258323  | SAA4           | - | EGFR |
| cg01000094 | 11 | 18283327  | 0              | - | EGFR |
| cg08418111 | 11 | 18433745  | LDHC           | - | EGFR |
| cg05501357 | 11 | 33308269  | HIPK3          | - | EGFR |
| cg25600606 | 11 | 33308345  | HIPK3          | - | EGFR |
| cg01888411 | 11 | 34378293  | ABTB2          | - | EGFR |
| cg04125208 | 11 | 35161229  | CD44           | - | EGFR |
| cg09017174 | 11 | 35440525  | SLC1A2         | - | EGFR |
| cg00418150 | 11 | 44327869  | ALX4           | - | EGFR |
| cg10516359 | 11 | 45827763  | SLC35C1        | - | EGFR |
| cg18765542 | 11 | 46354101  | DGKZ           | - | EGFR |
| cg12613344 | 11 | 47280305  | NR1H3          | - | EGFR |
| cg00554250 | 11 | 47281370  | NR1H3          | - | EGFR |
| cg26365553 | 11 | 47290613  | MADD           | - | EGFR |
| cg06147863 | 11 | 47400113  | SPI1           | - | EGFR |
| cg15679098 | 11 | 47470674  | RAPSN          | - | EGFR |
| cg00394658 | 11 | 48001669  | PTPRJ          | - | EGFR |
| cg06780358 | 11 | 48003065  | PTPRJ          | - | EGFR |
| cg25072179 | 11 | 57004934  | APLNR          | - | EGFR |
| cg24855780 | 11 | 57089366  | TNKS1BP1       | - | EGFR |
| cg26128441 | 11 | 57105339  | P2RX3          | - | EGFR |
| cg17995823 | 11 | 57529684  | CTNND1         | - | EGFR |
| cg18538812 | 11 | 59614095  | GIF            | - | EGFR |
| cg10853416 | 11 | 60145275  | MS4A7          | - | EGFR |
| cg18343292 | 11 | 60146078  | MS4A7          | - | EGFR |
| cg17397420 | 11 | 60552236  | MS4A10         | - | EGFR |
| cg02965078 | 11 | 60623504  | PTGDR2         | - | EGFR |
| cg15553522 | 11 | 60692329  | TMEM132A       | - | EGFR |
| cg04237003 | 11 | 61522002  | MYRF           | - | EGFR |
| cg18573251 | 11 | 61685748  | RAB3IL1        | - | EGFR |
| cg15538427 | 11 | 62457014  | LRRN4CL        | - | EGFR |
| cg20342105 | 11 | 62474910  | GNG3           | - | EGFR |
| cg13802364 | 11 | 63684106  | RCOR2          | - | EGFR |
| cg21111471 | 11 | 63871000  | FLRT1          | - | EGFR |
| cg24088438 | 11 | 63974229  | FERMT3         | - | EGFR |
| cg20162599 | 11 | 63990138  | FERMT3         | - | EGFR |
| cg09343150 | 11 | 64579163  | MEN1           | - | EGFR |
| cg22417398 | 11 | 65293094  | SCYL1          | - | EGFR |
| cg08965235 | 11 | 65325158  | LTBP3          | - | EGFR |
| cg20909686 | 11 | 65554042  | OVOL1          | - | EGFR |
| cg15887846 | 11 | 65779192  | CST6           | - | EGFR |
| cg19026260 | 11 | 66045351  | CNIH2          | - | EGFR |
| cg14027234 | 11 | 66084163  | CD248          | - | EGFR |
| cg03851112 | 11 | 66278358  | BBS1           | - | EGFR |
| cg16046376 | 11 | 66721779  | PC             | - | EGFR |
| cg00587613 | 11 | 67220223  | GPR152         | - | EGFR |
| cg09701102 | 11 | 67373083  | NDUFV1         | - | EGFR |
| cg14353201 | 11 | 67448395  | ALDH3B2        | - | EGFR |
| cg07730301 | 11 | 67777952  | ALDH3B1        | - | EGFR |
| cg04464446 | 11 | 68452845  | GAL            | - | EGFR |
| cg16721845 | 11 | 68518800  | MTL5           | - | EGFR |
| cg22933847 | 11 | 68780136  | MRGPRF         | - | EGFR |
| cg22484980 | 11 | 68815449  | TPCN2          | - | EGFR |
| cg05164185 | 11 | 69456412  | CCND1          | - | EGFR |
| cg09637363 | 11 | 69458644  | CCND1          | - | EGFR |
| cg06539449 | 11 | 69461008  | CCND1          | - | EGFR |
| cg20728496 | 11 | 71163555  | NADSYN1        | - | EGFR |
| cg25634666 | 11 | 71846788  | FOLR3          | - | EGFR |
| cg24777762 | 11 | 73087230  | RELT           | - | EGFR |
| cg19700658 | 11 | 73719872  | UCP3           | - | EGFR |
| cg05671350 | 11 | 74022348  | P4HA3          | - | EGFR |
| cg13633560 | 11 | 76380921  | LRRC32         | - | EGFR |
| cg14471615 | 11 | 76494102  | TSKU           | - | EGFR |
| cg17272843 | 11 | 77734280  | KCTD14         | - | EGFR |
| cg06023257 | 11 | 78129396  | GAB2           | - | EGFR |
| cg25437402 | 11 | 85779802  | PICALM         | - | EGFR |
| cg09645888 | 11 | 86383585  | ME3            | - | EGFR |
| cg17838516 | 11 | 92703536  | MTNR1B         | - | EGFR |
| cg26570233 | 11 | 93475962  | C11orf54       | - | EGFR |
| cg21296602 | 11 | 93476060  | C11orf54       | - | EGFR |
| cg06378107 | 11 | 100863057 | TMEM133        | - | EGFR |
| cg00347729 | 11 | 102651753 | MMP10          | - | EGFR |
| cg10694914 | 11 | 111250431 | POU2AF1        | - | EGFR |
| cg17468440 | 11 | 111637613 | PPP2R1B        | - | EGFR |
| cg13210534 | 11 | 111784328 | HSPB2-C11orf52 | - | EGFR |
| cg08775230 | 11 | 111789493 | C11orf52       | - | EGFR |
| cg24134767 | 11 | 113845638 | HTR3A          | - | EGFR |
| cg20570279 | 11 | 116659129 | ZNF259         | - | EGFR |
| cg25682080 | 11 | 116663103 | APOA5          | - | EGFR |
| cg06950730 | 11 | 117069479 | TAGLN          | - | EGFR |
| cg08956138 | 11 | 118175384 | CD3E           | - | EGFR |
| cg20492912 | 11 | 118230053 | UBE4A          | - | EGFR |
| cg06290096 | 11 | 118475984 | PHLDB1         | - | EGFR |
| cg14464791 | 11 | 118661599 | DDX6           | - | EGFR |
| cg18801806 | 11 | 118869385 | CCDC84         | - | EGFR |
| cg03222066 | 11 | 119019384 | ABCG4          | - | EGFR |
| cg09530763 | 11 | 119204876 | RNF26          | - | EGFR |
| cg12572278 | 11 | 120081259 | OAF            | - | EGFR |
| cg10061117 | 11 | 121322622 | SORL1          | - | EGFR |
| cg21929875 | 11 | 124622096 | VSIG2          | - | EGFR |
| cg10465696 | 11 | 124767948 | ROBO4          | - | EGFR |
| cg25041439 | 11 | 125753110 | HYLS1          | - | EGFR |
| cg17259265 | 11 | 125753373 | HYLS1          | - | EGFR |

|            |    |           |           |   |      |
|------------|----|-----------|-----------|---|------|
| cg08893585 | 11 | 129245309 | BARX2     | - | EGFR |
| cg26221631 | 11 | 129245988 | BARX2     | - | EGFR |
| cg02624129 | 11 | 130786230 | SNX19     | - | EGFR |
| cg09084200 | 11 | 134095863 | VPS26B    | - | EGFR |
| cg09360083 | 11 | 134124536 | ACAD8     | - | EGFR |
| cg15966757 | 12 | 372259    | SLC6A13   | - | EGFR |
| cg07594933 | 12 | 515355    | CCDC77    | - | EGFR |
| cg11065385 | 12 | 568798    | B4GALNT3  | - | EGFR |
| cg02915837 | 12 | 3069243   | TEAD4     | - | EGFR |
| cg21667836 | 12 | 3599355   | PRMT8     | - | EGFR |
| cg02554564 | 12 | 5603131   | NTF3      | - | EGFR |
| cg18738906 | 12 | 6483739   | SCNN1A    | - | EGFR |
| cg15784615 | 12 | 6493767   | LTBR      | - | EGFR |
| cg25683185 | 12 | 6756088   | ACRBP     | - | EGFR |
| cg19286986 | 12 | 6931017   | GPR162    | - | EGFR |
| cg15942562 | 12 | 6959471   | CDCA3     | - | EGFR |
| cg22475430 | 12 | 7033563   | ATN1      | - | EGFR |
| cg15776355 | 12 | 7245890   | C1R       | - | EGFR |
| cg15754084 | 12 | 7343020   | PEX5      | - | EGFR |
| cg13986618 | 12 | 7595981   | CD163L1   | - | EGFR |
| cg12762799 | 12 | 8693542   | CLEC4E    | - | EGFR |
| cg08752459 | 12 | 10022682  | CLEC2B    | - | EGFR |
| cg27190239 | 12 | 10085174  | CLEC2A    | - | EGFR |
| cg17469479 | 12 | 10183208  | CLEC9A    | - | EGFR |
| cg25494227 | 12 | 10331614  | TMEM52B   | - | EGFR |
| cg27181079 | 12 | 10766103  | MAGOHB    | - | EGFR |
| cg06552050 | 12 | 10875369  | YBX3      | - | EGFR |
| cg19491035 | 12 | 12502846  | MANSC1    | - | EGFR |
| cg05885720 | 12 | 13348429  | EMP1      | - | EGFR |
| cg22833175 | 12 | 14957520  | C12orf60  | - | EGFR |
| cg19826026 | 12 | 15114393  | ARHGD1B   | - | EGFR |
| cg10925082 | 12 | 15114703  | ARHGD1B   | - | EGFR |
| cg11511443 | 12 | 16761406  | LMO3      | - | EGFR |
| cg25764464 | 12 | 19282832  | PLEKHA5   | - | EGFR |
| cg04184278 | 12 | 21757759  | GYS2      | - | EGFR |
| cg00769520 | 12 | 22488465  | ST8SIA1   | - | EGFR |
| cg03521113 | 12 | 25204672  | LRMP      | - | EGFR |
| cg07469792 | 12 | 26112121  | RASSF8    | - | EGFR |
| cg03046445 | 12 | 26277826  | BHLHE41   | - | EGFR |
| cg21788470 | 12 | 28125673  | PTHLH     | - | EGFR |
| cg17489451 | 12 | 28410104  | CCDC91    | - | EGFR |
| cg24789869 | 12 | 31227241  | DDX11-AS1 | - | EGFR |
| cg01851399 | 12 | 33050217  | PKP2      | - | EGFR |
| cg00686022 | 12 | 40020078  | C12orf40  | - | EGFR |
| cg15417244 | 12 | 41831558  | PDZRN4    | - | EGFR |
| cg07588664 | 12 | 42719596  | ZCRB1     | - | EGFR |
| cg16041660 | 12 | 42983360  | PRICKLE1  | - | EGFR |
| cg22064451 | 12 | 49583496  | TUBA1A    | - | EGFR |
| cg07028869 | 12 | 49741164  | DNAJC22   | - | EGFR |
| cg20102673 | 12 | 49933539  | KCNH3     | - | EGFR |
| cg06742978 | 12 | 50451907  | ASIC1     | - | EGFR |
| cg18399183 | 12 | 51318138  | METTL7A   | - | EGFR |
| cg22566906 | 12 | 52399713  | GRASP     | - | EGFR |
| cg06132342 | 12 | 52761153  | KRT85     | - | EGFR |
| cg04254916 | 12 | 52914047  | KRT5      | - | EGFR |
| cg17667972 | 12 | 53208293  | KRT4      | - | EGFR |
| cg23696712 | 12 | 53228141  | KRT79     | - | EGFR |
| cg06311778 | 12 | 53441582  | TENC1     | - | EGFR |
| cg23841186 | 12 | 53492662  | IGFBP6    | - | EGFR |
| cg26556134 | 12 | 53492729  | IGFBP6    | - | EGFR |
| cg08374799 | 12 | 53601050  | ITGB7     | - | EGFR |
| cg16847051 | 12 | 54121714  | CALCOCO1  | - | EGFR |
| cg16983211 | 12 | 54427636  | MIR615    | - | EGFR |
| cg09303642 | 12 | 54690818  | NFE2      | - | EGFR |
| cg02192520 | 12 | 56114155  | RDH5      | - | EGFR |
| cg09106999 | 12 | 56360065  | PMEL      | - | EGFR |
| cg05347567 | 12 | 56512408  | ZC3H10    | - | EGFR |
| cg03184964 | 12 | 56584202  | SMARCC2   | - | EGFR |
| cg02153528 | 12 | 56618648  | NABP2     | - | EGFR |
| cg00472136 | 12 | 57410604  | TAC3      | - | EGFR |
| cg00364814 | 12 | 57691455  | R3HDM2    | - | EGFR |
| cg12883767 | 12 | 58013109  | SLC26A10  | - | EGFR |
| cg22490255 | 12 | 58138949  | TSPAN31   | - | EGFR |
| cg10708905 | 12 | 59313883  | LRIG3     | - | EGFR |
| cg11625946 | 12 | 59314263  | LRIG3     | - | EGFR |
| cg26706003 | 12 | 63546263  | AVPR1A    | - | EGFR |
| cg20098478 | 12 | 65515862  | WIF1      | - | EGFR |
| cg20395892 | 12 | 66582780  | IRAK3     | - | EGFR |
| cg23926526 | 12 | 68726610  | MDM1      | - | EGFR |
| cg17277939 | 12 | 70093008  | BEST3     | - | EGFR |
| cg13435381 | 12 | 71833017  | LGR5      | - | EGFR |
| cg00331237 | 12 | 77273319  | CSRP2     | - | EGFR |
| cg02845923 | 12 | 82750988  | CCDC59    | - | EGFR |
| cg04916911 | 12 | 86268154  | NTS       | - | EGFR |
| cg10501629 | 12 | 90049560  | ATP2B1    | - | EGFR |
| cg11738543 | 12 | 93967225  | SOCS2     | - | EGFR |
| cg23412850 | 12 | 93967387  | SOCS2     | - | EGFR |
| cg25229172 | 12 | 96336121  | CCDC38    | - | EGFR |
| cg21682902 | 12 | 96390960  | HAL       | - | EGFR |
| cg06836849 | 12 | 100751051 | SLC17A8   | - | EGFR |
| cg05063104 | 12 | 101603329 | SLC5A8    | - | EGFR |
| cg23855818 | 12 | 105323396 | SLC41A2   | - | EGFR |
| cg12025941 | 12 | 106977074 | RFX4      | - | EGFR |
| cg24646513 | 12 | 107380499 | MTERFD3   | - | EGFR |
| cg22836470 | 12 | 108991777 | TMEM119   | - | EGFR |

|            |    |           |               |   |      |
|------------|----|-----------|---------------|---|------|
| cg22801690 | 12 | 109274241 | DAO           | - | EGFR |
| cg01703884 | 12 | 109878174 | MYO1H         | - | EGFR |
| cg26292028 | 12 | 109878728 | MYO1H         | - | EGFR |
| cg13628514 | 12 | 110271439 | TRPV4         | - | EGFR |
| cg04375036 | 12 | 111181819 | PPP1CC        | - | EGFR |
| cg05149586 | 12 | 113859869 | SDSL          | - | EGFR |
| cg12113819 | 12 | 116716154 | MED13L        | - | EGFR |
| cg19850406 | 12 | 117174732 | C12orf49      | - | EGFR |
| cg21006686 | 12 | 117800240 | NOS1          | - | EGFR |
| cg14349467 | 12 | 118574068 | PEBP1         | - | EGFR |
| cg16396488 | 12 | 120766223 | PLA2G1B       | - | EGFR |
| cg08821669 | 12 | 120875978 | COX6A1        | - | EGFR |
| cg17917518 | 12 | 121647183 | P2RX4         | - | EGFR |
| cg19410364 | 12 | 121647217 | P2RX4         | - | EGFR |
| cg09088508 | 12 | 122231455 | RHOF          | - | EGFR |
| cg13702536 | 12 | 123215553 | HCAR1         | - | EGFR |
| cg05745851 | 12 | 123259105 | CCDC62        | - | EGFR |
| cg25463779 | 12 | 124773236 | FAM101A       | - | EGFR |
| cg00910168 | 12 | 125474021 | DHX37         | - | EGFR |
| cg06550629 | 12 | 131439172 | GPR133        | - | EGFR |
| cg23149053 | 12 | 132312205 | MMP17         | - | EGFR |
| cg02861781 | 13 | 20767498  | GJB2          | - | EGFR |
| cg03473518 | 13 | 20805656  | GJB6          | - | EGFR |
| cg22377389 | 13 | 20805679  | GJB6          | - | EGFR |
| cg07744166 | 13 | 27131484  | WASF3         | - | EGFR |
| cg09185773 | 13 | 27132773  | WASF3         | - | EGFR |
| cg15726245 | 13 | 27333506  | GPR12         | - | EGFR |
| cg23282559 | 13 | 33591130  | KL            | - | EGFR |
| cg05093686 | 13 | 36050788  | MAB2L1        | - | EGFR |
| cg12029639 | 13 | 36050993  | NBEA          | - | EGFR |
| cg17470143 | 13 | 36706433  | DCLK1         | - | EGFR |
| cg22609576 | 13 | 36920662  | SPG20         | - | EGFR |
| cg26611683 | 13 | 41241734  | FOXO1         | - | EGFR |
| cg00308665 | 13 | 47469654  | HTR2A         | - | EGFR |
| cg19427472 | 13 | 48892948  | RB1           | - | EGFR |
| cg05701114 | 13 | 50656127  | DLEU1         | - | EGFR |
| cg24821554 | 13 | 51639953  | GUCY1B2       | - | EGFR |
| cg05600717 | 13 | 52378744  | DHRS12        | - | EGFR |
| cg05256043 | 13 | 95131951  | DCT           | - | EGFR |
| cg25258291 | 13 | 98795562  | FARP1         | - | EGFR |
| cg16584172 | 13 | 100633446 | ZIC2          | - | EGFR |
| cg22971191 | 13 | 103719706 | SLC10A2       | - | EGFR |
| cg25802424 | 13 | 110438937 | IRS2          | - | EGFR |
| cg25734864 | 13 | 113812986 | PROZ          | - | EGFR |
| cg00029826 | 14 | 20801459  | CCNB1IP1      | - | EGFR |
| cg07300408 | 14 | 21058360  | RNASE11       | - | EGFR |
| cg13718960 | 14 | 21271313  | RNASE1        | - | EGFR |
| cg05245515 | 14 | 21467273  | SLC39A2       | - | EGFR |
| cg10599444 | 14 | 23305941  | MMP14         | - | EGFR |
| cg02039171 | 14 | 23588162  | CEBPE         | - | EGFR |
| cg05877109 | 14 | 23775794  | BCL2L2-PABPN1 | - | EGFR |
| cg01429391 | 14 | 23904930  | MYH7          | - | EGFR |
| cg23389061 | 14 | 24611157  | EMC9          | - | EGFR |
| cg13840968 | 14 | 24780926  | LTB4R         | - | EGFR |
| cg25775449 | 14 | 24781881  | LTB4R         | - | EGFR |
| cg24777950 | 14 | 25046121  | CTSG          | - | EGFR |
| cg24812523 | 14 | 32798762  | AKAP6         | - | EGFR |
| cg10494773 | 14 | 35452441  | SRP54         | - | EGFR |
| cg24733384 | 14 | 35516283  | FAM177A1      | - | EGFR |
| cg07850604 | 14 | 36003443  | INSM2         | - | EGFR |
| cg21443584 | 14 | 36789985  | MBIP          | - | EGFR |
| cg12249575 | 14 | 36988805  | NKX2-1        | - | EGFR |
| cg18909638 | 14 | 37666810  | MIPOL1        | - | EGFR |
| cg03026462 | 14 | 38064490  | FOXA1         | - | EGFR |
| cg08554114 | 14 | 53163204  | ERO1L         | - | EGFR |
| cg17460095 | 14 | 53418048  | FERMT2        | - | EGFR |
| cg24526899 | 14 | 54424149  | BMP4          | - | EGFR |
| cg08292050 | 14 | 55492636  | WDHD1         | - | EGFR |
| cg19903229 | 14 | 57960650  | C14orf105     | - | EGFR |
| cg26850503 | 14 | 59105341  | DACT1         | - | EGFR |
| cg12839593 | 14 | 61116227  | SIX1          | - | EGFR |
| cg02210123 | 14 | 63670835  | RHOJ          | - | EGFR |
| cg20648149 | 14 | 64319089  | SYNE2         | - | EGFR |
| cg01520924 | 14 | 65006170  | HSPA2         | - | EGFR |
| cg12281657 | 14 | 65016595  | PPP1R36       | - | EGFR |
| cg04536575 | 14 | 65016802  | PPP1R36       | - | EGFR |
| cg20141916 | 14 | 67878973  | PLEK2         | - | EGFR |
| cg10979891 | 14 | 70345898  | SMOC1         | - | EGFR |
| cg23681213 | 14 | 74180391  | PNMA1         | - | EGFR |
| cg21207436 | 14 | 74815316  | VRTN          | - | EGFR |
| cg08615333 | 14 | 76447413  | TGFB3         | - | EGFR |
| cg26298099 | 14 | 76837758  | ESRRB         | - | EGFR |
| cg15572745 | 14 | 78870232  | NRXN3         | - | EGFR |
| cg02657438 | 14 | 81864899  | STON2         | - | EGFR |
| cg10334928 | 14 | 81865007  | STON2         | - | EGFR |
| cg12624641 | 14 | 90420569  | EFCAB11       | - | EGFR |
| cg09730349 | 14 | 90420579  | EFCAB11       | - | EGFR |
| cg16034652 | 14 | 93798309  | BTBD7         | - | EGFR |
| cg19512848 | 14 | 94463829  | LINC00521     | - | EGFR |
| cg10025865 | 14 | 94789681  | SERPINA6      | - | EGFR |
| cg02181506 | 14 | 94856984  | SERPINA1      | - | EGFR |
| cg22013966 | 14 | 95106170  | SERPINA13P    | - | EGFR |
| cg02727423 | 14 | 100258973 | EML1          | - | EGFR |
| cg08307816 | 14 | 100626192 | DEGS2         | - | EGFR |
| cg19434303 | 14 | 100843067 | WDR25         | - | EGFR |

|            |    |           |          |   |      |
|------------|----|-----------|----------|---|------|
| cg15373285 | 14 | 101293090 | MEG3     | - | EGFR |
| cg08999486 | 14 | 103523305 | CDC42BPB | - | EGFR |
| cg15444978 | 14 | 103851370 | MARK3    | - | EGFR |
| cg23090046 | 14 | 104094619 | KLC1     | - | EGFR |
| cg08933517 | 14 | 104436057 | TDRD9    | - | EGFR |
| cg22090592 | 14 | 105174642 | INF2     | - | EGFR |
| cg24404909 | 14 | 105175111 | INF2     | - | EGFR |
| cg04014889 | 15 | 23890593  | MAGEL2   | - | EGFR |
| cg01989224 | 15 | 23932758  | NDN      | - | EGFR |
| cg02171545 | 15 | 25093366  | SNRPN    | - | EGFR |
| cg02125271 | 15 | 25200406  | SNRPN    | - | EGFR |
| cg22555495 | 15 | 25201224  | SNRPN    | - | EGFR |
| cg08828036 | 15 | 26109204  | ATP10A   | - | EGFR |
| cg12902039 | 15 | 28344412  | OCA2     | - | EGFR |
| cg11510839 | 15 | 28344488  | OCA2     | - | EGFR |
| cg18099844 | 15 | 34395540  | PGBD4    | - | EGFR |
| cg19570574 | 15 | 39872824  | THBS1    | - | EGFR |
| cg04051458 | 15 | 39873060  | THBS1    | - | EGFR |
| cg17497271 | 15 | 40212781  | GPR176   | - | EGFR |
| cg27494383 | 15 | 41805868  | LTK      | - | EGFR |
| cg14792155 | 15 | 42289618  | PLA2G4E  | - | EGFR |
| cg12113132 | 15 | 43476923  | CCNDBP1  | - | EGFR |
| cg21033855 | 15 | 43662581  | ZSCAN29  | - | EGFR |
| cg03533811 | 15 | 43878085  | PIIP5K1  | - | EGFR |
| cg08027001 | 15 | 45815269  | SLC30A4  | - | EGFR |
| cg20603888 | 15 | 48470973  | MYEF2    | - | EGFR |
| cg27525902 | 15 | 49716247  | FGF7     | - | EGFR |
| cg13486556 | 15 | 52044539  | TMOD2    | - | EGFR |
| cg23287547 | 15 | 52820479  | MYO5A    | - | EGFR |
| cg10936230 | 15 | 55582890  | RAB27A   | - | EGFR |
| cg08433095 | 15 | 55801069  | DYX1C1   | - | EGFR |
| cg23412777 | 15 | 55881706  | PYGO1    | - | EGFR |
| cg02198044 | 15 | 56286336  | NEDD4    | - | EGFR |
| cg07551659 | 15 | 57669165  | CGNL1    | - | EGFR |
| cg16391792 | 15 | 58723657  | LIPC     | - | EGFR |
| cg01733599 | 15 | 58723851  | LIPC     | - | EGFR |
| cg04826883 | 15 | 63673893  | CA12     | - | EGFR |
| cg26817573 | 15 | 64126729  | HERC1    | - | EGFR |
| cg09325101 | 15 | 65342522  | SLC51B   | - | EGFR |
| cg12605747 | 15 | 66798443  | ZWILCH   | - | EGFR |
| cg25665697 | 15 | 66857881  | LCTL     | - | EGFR |
| cg05338167 | 15 | 68498251  | CALML4   | - | EGFR |
| cg13117105 | 15 | 69591357  | PAQR5    | - | EGFR |
| cg05764376 | 15 | 71184590  | THAP10   | - | EGFR |
| cg15089487 | 15 | 71185252  | LRRC49   | - | EGFR |
| cg03682712 | 15 | 74219307  | LOXL1    | - | EGFR |
| cg22657536 | 15 | 74988951  | EDC3     | - | EGFR |
| cg10481417 | 15 | 75018528  | CYP1A1   | - | EGFR |
| cg20433014 | 15 | 75018583  | CYP1A1   | - | EGFR |
| cg19817399 | 15 | 75018674  | CYP1A1   | - | EGFR |
| cg22290566 | 15 | 75105286  | LMAN1L   | - | EGFR |
| cg20630655 | 15 | 75918700  | SNUPN    | - | EGFR |
| cg27321979 | 15 | 76352532  | C15orf27 | - | EGFR |
| cg02831604 | 15 | 76628725  | ISL2     | - | EGFR |
| cg15973234 | 15 | 81072152  | KIAA1199 | - | EGFR |
| cg17018527 | 15 | 83775931  | TM6SF1   | - | EGFR |
| cg12302621 | 15 | 85426911  | SLC28A1  | - | EGFR |
| cg10453365 | 15 | 90039909  | RHCG     | - | EGFR |
| cg01294695 | 15 | 90294640  | MESP1    | - | EGFR |
| cg05501584 | 15 | 92936306  | ST8SIA2  | - | EGFR |
| cg10135717 | 15 | 100882647 | ADAMTS17 | - | EGFR |
| cg23191950 | 15 | 101419074 | ALDH1A3  | - | EGFR |
| cg19510698 | 15 | 101421249 | ALDH1A3  | - | EGFR |
| cg22730560 | 15 | 101835345 | SNRPA1   | - | EGFR |
| cg11876012 | 16 | 101686    | POLR3K   | - | EGFR |
| cg16003913 | 16 | 127072    | MPG      | - | EGFR |
| cg08858521 | 16 | 681022    | WFIKK1   | - | EGFR |
| cg09305478 | 16 | 691988    | FAM195A  | - | EGFR |
| cg17328659 | 16 | 729498    | STUB1    | - | EGFR |
| cg27088655 | 16 | 755793    | FBXL16   | - | EGFR |
| cg16133244 | 16 | 1400833   | TSR3     | - | EGFR |
| cg05982504 | 16 | 1844962   | IGFALS   | - | EGFR |
| cg14074117 | 16 | 1909714   | MEIOB    | - | EGFR |
| cg06001166 | 16 | 2004052   | RPL3L    | - | EGFR |
| cg01797043 | 16 | 2004686   | RPL3L    | - | EGFR |
| cg26486663 | 16 | 2040863   | SYNGR3   | - | EGFR |
| cg10889070 | 16 | 2317379   | RNPS1    | - | EGFR |
| cg22721827 | 16 | 2520958   | NTN3     | - | EGFR |
| cg22536398 | 16 | 2521659   | NTN3     | - | EGFR |
| cg05461841 | 16 | 2879944   | ZG16B    | - | EGFR |
| cg03038672 | 16 | 3062056   | CLDN9    | - | EGFR |
| cg23813257 | 16 | 3115286   | IL32     | - | EGFR |
| cg26014197 | 16 | 3143153   | ZSCAN10  | - | EGFR |
| cg21514871 | 16 | 3307814   | MEFV     | - | EGFR |
| cg24198678 | 16 | 3703304   | DNASE1   | - | EGFR |
| cg01934797 | 16 | 4381661   | GLIS2    | - | EGFR |
| cg19168338 | 16 | 4465731   | CORO7    | - | EGFR |
| cg05215575 | 16 | 4838722   | 42625    | - | EGFR |
| cg16213655 | 16 | 4987532   | PPL      | - | EGFR |
| cg12914014 | 16 | 9058365   | USP7     | - | EGFR |
| cg00461841 | 16 | 10523485  | ATF7IP2  | - | EGFR |
| cg21503093 | 16 | 10674468  | EMP2     | - | EGFR |
| cg00451635 | 16 | 10675030  | EMP2     | - | EGFR |
| cg08268266 | 16 | 11680284  | LITAF    | - | EGFR |
| cg14959707 | 16 | 11876391  | ZC3H7A   | - | EGFR |

|            |    |          |          |   |      |
|------------|----|----------|----------|---|------|
| cg23896545 | 16 | 14927304 | NOMO1    | - | EGFR |
| cg27247832 | 16 | 22018748 | C16orf52 | - | EGFR |
| cg26025944 | 16 | 23193717 | SCNN1G   | - | EGFR |
| cg23280807 | 16 | 24857579 | SLC5A11  | - | EGFR |
| cg12391783 | 16 | 27269148 | NSMCE1   | - | EGFR |
| cg19423311 | 16 | 27413904 | IL21R    | - | EGFR |
| cg17122311 | 16 | 28517278 | IL27     | - | EGFR |
| cg12743398 | 16 | 28609531 | SULT1A2  | - | EGFR |
| cg23051598 | 16 | 28834567 | ATXN2L   | - | EGFR |
| cg23663476 | 16 | 28996449 | LAT      | - | EGFR |
| cg19889584 | 16 | 29625696 | SLC7A5P1 | - | EGFR |
| cg27657249 | 16 | 29691026 | QPRT     | - | EGFR |
| cg13271951 | 16 | 30041760 | FAM57B   | - | EGFR |
| cg13543096 | 16 | 30125400 | GDPD3    | - | EGFR |
| cg23894003 | 16 | 30676444 | FBR3     | - | EGFR |
| cg04368877 | 16 | 30937210 | FBXL19   | - | EGFR |
| cg13439730 | 16 | 31146999 | PRSS8    | - | EGFR |
| cg15468095 | 16 | 31214401 | PYCARD   | - | EGFR |
| cg12100791 | 16 | 31214417 | PYCARD   | - | EGFR |
| cg15337006 | 16 | 31271009 | ITGAM    | - | EGFR |
| cg02164442 | 16 | 31405101 | ITGAD    | - | EGFR |
| cg21644628 | 16 | 50099438 | HEATR3   | - | EGFR |
| cg22244418 | 16 | 56484117 | NUDT21   | - | EGFR |
| cg23217005 | 16 | 56691744 | MT1F     | - | EGFR |
| cg15473868 | 16 | 56716621 | MT1X     | - | EGFR |
| cg17808849 | 16 | 56965376 | HERPUD1  | - | EGFR |
| cg26916607 | 16 | 56994770 | CETP     | - | EGFR |
| cg07634706 | 16 | 57438524 | CCL17    | - | EGFR |
| cg16480209 | 16 | 58004460 | CNGB1    | - | EGFR |
| cg25771195 | 16 | 58163814 | C16orf80 | - | EGFR |
| cg08872742 | 16 | 66400320 | CDH5     | - | EGFR |
| cg23297477 | 16 | 66638293 | CMTM3    | - | EGFR |
| cg14792480 | 16 | 66954257 | CDH16    | - | EGFR |
| cg22374142 | 16 | 67198725 | HSF4     | - | EGFR |
| cg05546038 | 16 | 67207033 | NOL3     | - | EGFR |
| cg19514469 | 16 | 67233432 | ELMO3    | - | EGFR |
| cg04925864 | 16 | 67562517 | FAM65A   | - | EGFR |
| cg04155026 | 16 | 67841269 | TSNAXIP1 | - | EGFR |
| cg18711066 | 16 | 68118822 | NFATC3   | - | EGFR |
| cg20716119 | 16 | 68771763 | CDH1     | - | EGFR |
| cg08461397 | 16 | 69220726 | SNTB2    | - | EGFR |
| cg16148454 | 16 | 69385606 | TMED6    | - | EGFR |
| cg18368125 | 16 | 69385827 | TMED6    | - | EGFR |
| cg12347740 | 16 | 70680380 | IL34     | - | EGFR |
| cg13885201 | 16 | 71496385 | ZNF23    | - | EGFR |
| cg05535113 | 16 | 71559579 | CHST4    | - | EGFR |
| cg22136365 | 16 | 71611043 | TAT      | - | EGFR |
| cg06172871 | 16 | 72088244 | HP       | - | EGFR |
| cg09584711 | 16 | 72096944 | HPR      | - | EGFR |
| cg01880569 | 16 | 82660328 | CDH13    | - | EGFR |
| cg05887405 | 16 | 83982436 | 0        | - | EGFR |
| cg23606079 | 16 | 84853871 | CRISPLD2 | - | EGFR |
| cg15819333 | 16 | 85832091 | EMC8     | - | EGFR |
| cg02932689 | 16 | 87425223 | FBXO31   | - | EGFR |
| cg00073650 | 16 | 88922166 | GALNS    | - | EGFR |
| cg11386746 | 16 | 89237370 | CDH15    | - | EGFR |
| cg15206445 | 16 | 89573312 | SPG7     | - | EGFR |
| cg07690018 | 16 | 89642492 | CPNE7    | - | EGFR |
| cg25193494 | 16 | 90016004 | DEF8     | - | EGFR |
| cg13969584 | 16 | 90038469 | AFG3L1P  | - | EGFR |
| cg00422913 | 17 | 1619022  | MIR22HG  | - | EGFR |
| cg04780454 | 17 | 1647819  | SERPINF2 | - | EGFR |
| cg24214470 | 17 | 1665119  | SERPINF1 | - | EGFR |
| cg01168201 | 17 | 1958412  | HIC1     | - | EGFR |
| cg14014613 | 17 | 3196049  | OR3A1    | - | EGFR |
| cg01526089 | 17 | 3819390  | P2RX1    | - | EGFR |
| cg04511534 | 17 | 4463371  | GGT6     | - | EGFR |
| cg17820591 | 17 | 4853706  | ENO3     | - | EGFR |
| cg27146152 | 17 | 6659364  | XAF1     | - | EGFR |
| cg07389922 | 17 | 7154007  | CTDNBP1  | - | EGFR |
| cg11181795 | 17 | 7219971  | GPS2     | - | EGFR |
| cg25499099 | 17 | 7284662  | TNK1     | - | EGFR |
| cg03169180 | 17 | 7310347  | NLGN2    | - | EGFR |
| cg14782678 | 17 | 7339721  | TMEM102  | - | EGFR |
| cg17267493 | 17 | 7460485  | TNFSF13  | - | EGFR |
| cg03644378 | 17 | 7761459  | LSMD1    | - | EGFR |
| cg01837574 | 17 | 7836610  | CNTROB   | - | EGFR |
| cg14425294 | 17 | 7905636  | GUCY2D   | - | EGFR |
| cg15799267 | 17 | 7942406  | ALOX15B  | - | EGFR |
| cg07911673 | 17 | 8198092  | SLC25A35 | - | EGFR |
| cg02016419 | 17 | 15245237 | TEKT3    | - | EGFR |
| cg21495715 | 17 | 18854560 | SLC5A10  | - | EGFR |
| cg23276115 | 17 | 18950337 | GRAP     | - | EGFR |
| cg14315198 | 17 | 26879866 | UNC119   | - | EGFR |
| cg15692239 | 17 | 26903955 | ALDOC    | - | EGFR |
| cg09076584 | 17 | 26941253 | SGK494   | - | EGFR |
| cg05668853 | 17 | 27044169 | RAB34    | - | EGFR |
| cg22289810 | 17 | 29421607 | MIR4733  | - | EGFR |
| cg19959519 | 17 | 29422806 | NF1      | - | EGFR |
| cg09309269 | 17 | 30770961 | PSMD11   | - | EGFR |
| cg04106785 | 17 | 30813145 | CDK5R1   | - | EGFR |
| cg24615251 | 17 | 32683481 | CCL13    | - | EGFR |
| cg13859324 | 17 | 33474692 | UNC45B   | - | EGFR |
| cg25013053 | 17 | 33475031 | UNC45B   | - | EGFR |
| cg20496643 | 17 | 34058597 | RASL10B  | - | EGFR |

|            |    |          |                |   |      |
|------------|----|----------|----------------|---|------|
| cg09256683 | 17 | 34313637 | CCL14          | - | EGFR |
| cg14916288 | 17 | 34345136 | CCL23          | - | EGFR |
| cg09234474 | 17 | 35850659 | DUSP14         | - | EGFR |
| cg02992647 | 17 | 36004446 | DDX52          | - | EGFR |
| cg12788467 | 17 | 36105335 | HNFB1          | - | EGFR |
| cg11993754 | 17 | 37856513 | ERBB2          | - | EGFR |
| cg16332577 | 17 | 37886349 | MIEN1          | - | EGFR |
| cg19511844 | 17 | 38084119 | ORMDL3         | - | EGFR |
| cg03812679 | 17 | 38170632 | CSF3           | - | EGFR |
| cg14592065 | 17 | 38209993 | MED24          | - | EGFR |
| cg09495351 | 17 | 38375257 | WIPF2          | - | EGFR |
| cg24340657 | 17 | 38859934 | KRT24          | - | EGFR |
| cg24249775 | 17 | 38978344 | KRT10          | - | EGFR |
| cg09088193 | 17 | 39122765 | KRT39          | - | EGFR |
| cg15312323 | 17 | 39317694 | KRTAP4-4       | - | EGFR |
| cg20331177 | 17 | 39334970 | KRTAP4-2       | - | EGFR |
| cg00550617 | 17 | 39405817 | KRTAP9-4       | - | EGFR |
| cg16242770 | 17 | 39471738 | KRTAP17-1      | - | EGFR |
| cg09538582 | 17 | 39637325 | KRT35          | - | EGFR |
| cg23128056 | 17 | 39674626 | KRT15          | - | EGFR |
| cg11983245 | 17 | 39675154 | KRT15          | - | EGFR |
| cg01602596 | 17 | 39743526 | KRT14          | - | EGFR |
| cg05325699 | 17 | 39890756 | HAP1           | - | EGFR |
| cg10708793 | 17 | 40264626 | DHX58          | - | EGFR |
| cg08434547 | 17 | 40272901 | KAT2A          | - | EGFR |
| cg20406482 | 17 | 40333521 | KCNH4          | - | EGFR |
| cg05159732 | 17 | 40337534 | HCRT           | - | EGFR |
| cg20724073 | 17 | 40719654 | MLX            | - | EGFR |
| cg26990660 | 17 | 40913221 | RAMP2          | - | EGFR |
| cg22325715 | 17 | 40951156 | CNTD1          | - | EGFR |
| cg21602160 | 17 | 41003272 | AOC3           | - | EGFR |
| cg11492403 | 17 | 41131552 | PTGES3L-AARSD1 | - | EGFR |
| cg08090640 | 17 | 41159289 | IFI35          | - | EGFR |
| cg19088651 | 17 | 41277213 | BRCA1          | - | EGFR |
| cg21038703 | 17 | 42248358 | ASB16          | - | EGFR |
| cg10183248 | 17 | 42295591 | UBTF           | - | EGFR |
| cg25809905 | 17 | 42467728 | ITGA2B         | - | EGFR |
| cg06471905 | 17 | 42835688 | ADAM11         | - | EGFR |
| cg20163288 | 17 | 42908052 | GJC1           | - | EGFR |
| cg12866859 | 17 | 43224332 | HEXIM1         | - | EGFR |
| cg00853068 | 17 | 43298592 | FMNL1          | - | EGFR |
| cg04945541 | 17 | 43299826 | FMNL1          | - | EGFR |
| cg19832721 | 17 | 44249866 | KANSL1         | - | EGFR |
| cg17185639 | 17 | 45330862 | ITGB3          | - | EGFR |
| cg14360917 | 17 | 45992122 | SP2            | - | EGFR |
| cg18988110 | 17 | 46035343 | PRR15L         | - | EGFR |
| cg08137716 | 17 | 46871905 | TLL6           | - | EGFR |
| cg07460665 | 17 | 46908912 | CALCOCO2       | - | EGFR |
| cg20551517 | 17 | 47046292 | GIP            | - | EGFR |
| cg04019407 | 17 | 47046304 | GIP            | - | EGFR |
| cg20858478 | 17 | 47210276 | B4GALNT2       | - | EGFR |
| cg25839227 | 17 | 47288502 | GNGT2          | - | EGFR |
| cg10688991 | 17 | 48072565 | DLX3           | - | EGFR |
| cg04216597 | 17 | 48639836 | CACNA1G-AS1    | - | EGFR |
| cg00081975 | 17 | 48712370 | ABCC3          | - | EGFR |
| cg06827038 | 17 | 48912952 | WFIKK2         | - | EGFR |
| cg02880679 | 17 | 49295615 | MBTD1          | - | EGFR |
| cg17686885 | 17 | 52977769 | TOM1L1         | - | EGFR |
| cg07056057 | 17 | 56159620 | DYNLL2         | - | EGFR |
| cg09572685 | 17 | 56293543 | MKS1           | - | EGFR |
| cg24835159 | 17 | 56494554 | RNF43          | - | EGFR |
| cg06849227 | 17 | 61599694 | KCNH6          | - | EGFR |
| cg24459563 | 17 | 65040609 | CACNG1         | - | EGFR |
| cg21660392 | 17 | 66950545 | ABCA8          | - | EGFR |
| cg01160766 | 17 | 72199871 | RPL38          | - | EGFR |
| cg24274272 | 17 | 72278023 | DNAI2          | - | EGFR |
| cg09225321 | 17 | 72920278 | OTOP2          | - | EGFR |
| cg19776090 | 17 | 73178957 | SUMO2          | - | EGFR |
| cg24670151 | 17 | 73256558 | GGA3           | - | EGFR |
| cg12146151 | 17 | 73716945 | ITGB4          | - | EGFR |
| cg26527984 | 17 | 73761562 | GALK1          | - | EGFR |
| cg07471052 | 17 | 73996245 | CDK3           | - | EGFR |
| cg21016177 | 17 | 74100207 | EXOC7          | - | EGFR |
| cg21522303 | 17 | 74581331 | ST6GALNAC2     | - | EGFR |
| cg08666623 | 17 | 74582683 | ST6GALNAC2     | - | EGFR |
| cg13015534 | 17 | 74639793 | ST6GALNAC1     | - | EGFR |
| cg06799664 | 17 | 76567121 | DNAH17         | - | EGFR |
| cg23918047 | 17 | 79828356 | ARHGDIA        | - | EGFR |
| cg03000846 | 17 | 79990263 | RAC3           | - | EGFR |
| cg04366367 | 17 | 80008541 | RFNG           | - | EGFR |
| cg21565972 | 17 | 80109576 | CCDC57         | - | EGFR |
| cg27449489 | 17 | 80316860 | TEX19          | - | EGFR |
| cg10281770 | 17 | 80606947 | WDR45B         | - | EGFR |
| cg06454226 | 18 | 2572965  | NDC80          | - | EGFR |
| cg14155416 | 18 | 6414330  | L3MBTL4        | - | EGFR |
| cg07075930 | 18 | 7567717  | PTPRM          | - | EGFR |
| cg01946574 | 18 | 7568186  | PTPRM          | - | EGFR |
| cg25619607 | 18 | 22006735 | IMPACT         | - | EGFR |
| cg00729275 | 18 | 24445134 | AQP4-AS1       | - | EGFR |
| cg15976539 | 18 | 24445318 | AQP4-AS1       | - | EGFR |
| cg00566759 | 18 | 28682345 | DSC2           | - | EGFR |
| cg14311811 | 18 | 29077863 | DSG2           | - | EGFR |
| cg02930996 | 18 | 29265842 | B4GALT6        | - | EGFR |
| cg02901122 | 18 | 33647344 | RPRD1A         | - | EGFR |
| cg21574400 | 18 | 47088309 | LIPG           | - | EGFR |

|            |    |          |             |   |      |
|------------|----|----------|-------------|---|------|
| cg06777274 | 18 | 48406251 | ME2         | - | EGFR |
| cg01625242 | 18 | 56886915 | GRP         | - | EGFR |
| cg08724563 | 18 | 56940755 | RAX         | - | EGFR |
| cg17602451 | 18 | 60985645 | BCL2        | - | EGFR |
| cg27100123 | 18 | 61636779 | SERPINB8    | - | EGFR |
| cg05851163 | 18 | 65183566 | LOC643542   | - | EGFR |
| cg25010118 | 18 | 65184398 | DSEL        | - | EGFR |
| cg01517728 | 18 | 67955578 | SOC56       | - | EGFR |
| cg06398181 | 18 | 74536226 | ZNF236      | - | EGFR |
| cg20974196 | 19 | 859983   | CFD         | - | EGFR |
| cg12998614 | 19 | 917068   | KISS1R      | - | EGFR |
| cg18084554 | 19 | 929046   | ARID3A      | - | EGFR |
| cg05989429 | 19 | 1041026  | ABCA7       | - | EGFR |
| cg20583073 | 19 | 3178759  | S1PR4       | - | EGFR |
| cg14117297 | 19 | 4301870  | TMIGD2      | - | EGFR |
| cg09918674 | 19 | 4638933  | TNFAIP8L1   | - | EGFR |
| cg03996793 | 19 | 4769537  | MIR7-3HG    | - | EGFR |
| cg07997737 | 19 | 5822630  | NRTN        | - | EGFR |
| cg16992787 | 19 | 5914669  | CAPS        | - | EGFR |
| cg12999109 | 19 | 6333587  | ACER1       | - | EGFR |
| cg17612991 | 19 | 6721016  | C3          | - | EGFR |
| cg02085507 | 19 | 6739192  | TRIP10      | - | EGFR |
| cg15055101 | 19 | 6766609  | SH2D3A      | - | EGFR |
| cg22889448 | 19 | 6886962  | EMR1        | - | EGFR |
| cg02981853 | 19 | 7445850  | 0           | - | EGFR |
| cg22322184 | 19 | 7734203  | RETN        | - | EGFR |
| cg12387247 | 19 | 7766974  | FCER2       | - | EGFR |
| cg00466492 | 19 | 7991731  | CTXN1       | - | EGFR |
| cg16745616 | 19 | 8428856  | ANGPTL4     | - | EGFR |
| cg17454897 | 19 | 8675471  | ADAMTS10    | - | EGFR |
| cg13727946 | 19 | 8953473  | MBD3L1      | - | EGFR |
| cg21494776 | 19 | 10397780 | ICAM4       | - | EGFR |
| cg06855803 | 19 | 10450364 | ICAM3       | - | EGFR |
| cg08859675 | 19 | 10563771 | PDE4A       | - | EGFR |
| cg17165284 | 19 | 10829165 | MIR638      | - | EGFR |
| cg26864028 | 19 | 11494980 | EPOR        | - | EGFR |
| cg02433671 | 19 | 11529856 | RGL3        | - | EGFR |
| cg00033773 | 19 | 12779366 | WDR83OS     | - | EGFR |
| cg12202913 | 19 | 12846618 | C19orf43    | - | EGFR |
| cg03172991 | 19 | 13105728 | NFIX        | - | EGFR |
| cg04432009 | 19 | 13213688 | LYL1        | - | EGFR |
| cg27397287 | 19 | 14492495 | CD97        | - | EGFR |
| cg15712267 | 19 | 14629905 | DNAJB1      | - | EGFR |
| cg22469141 | 19 | 14640373 | TECR        | - | EGFR |
| cg16749578 | 19 | 17357619 | NR2F6       | - | EGFR |
| cg01254505 | 19 | 17516470 | BST2        | - | EGFR |
| cg06305609 | 19 | 17634172 | FAM129C     | - | EGFR |
| cg06189133 | 19 | 17931995 | INSL3       | - | EGFR |
| cg10618882 | 19 | 18509358 | LRRC25      | - | EGFR |
| cg11399100 | 19 | 18722368 | TMEM59L     | - | EGFR |
| cg24482234 | 19 | 19006439 | GDF1        | - | EGFR |
| cg16899036 | 19 | 19052705 | HOMER3      | - | EGFR |
| cg02286642 | 19 | 24270073 | ZNF254      | - | EGFR |
| cg08700306 | 19 | 33686390 | LRP3        | - | EGFR |
| cg06151964 | 19 | 35531417 | HPN         | - | EGFR |
| cg17920197 | 19 | 35627220 | LGI4        | - | EGFR |
| cg27461196 | 19 | 35630106 | FXYP1       | - | EGFR |
| cg23680518 | 19 | 36020232 | SBSN        | - | EGFR |
| cg00739120 | 19 | 36035875 | TMEM147     | - | EGFR |
| cg04713352 | 19 | 36055013 | ATP4A       | - | EGFR |
| cg22802439 | 19 | 36157825 | UPK1A       | - | EGFR |
| cg15660498 | 19 | 36249933 | C19orf55    | - | EGFR |
| cg09056317 | 19 | 36607008 | POLR2I      | - | EGFR |
| cg15383087 | 19 | 36910144 | ZFP82       | - | EGFR |
| cg01594262 | 19 | 38806145 | YIF1B       | - | EGFR |
| cg08980578 | 19 | 38811036 | KCNK6       | - | EGFR |
| cg15679651 | 19 | 39108529 | MAP4K1      | - | EGFR |
| cg12431401 | 19 | 39369277 | RINL        | - | EGFR |
| cg02197293 | 19 | 39523158 | FBXO27      | - | EGFR |
| cg05607401 | 19 | 39826693 | GMFG        | - | EGFR |
| cg03139057 | 19 | 39989234 | DLL3        | - | EGFR |
| cg07173760 | 19 | 40229266 | CLC         | - | EGFR |
| cg09089053 | 19 | 40731797 | CNTD2       | - | EGFR |
| cg20513206 | 19 | 40855502 | C19orf47    | - | EGFR |
| cg09381003 | 19 | 41082314 | SHKBP1      | - | EGFR |
| cg03395546 | 19 | 41222599 | ADCK4       | - | EGFR |
| cg08367223 | 19 | 41255304 | C19orf54    | - | EGFR |
| cg23181133 | 19 | 42300812 | CEACAM3     | - | EGFR |
| cg11719283 | 19 | 42574717 | 0           | - | EGFR |
| cg14679230 | 19 | 42931679 | LIPE        | - | EGFR |
| cg20657383 | 19 | 43033362 | CEACAM1     | - | EGFR |
| cg05473175 | 19 | 44143644 | CADM4       | - | EGFR |
| cg25344367 | 19 | 44220337 | IRGC        | - | EGFR |
| cg10604333 | 19 | 44529262 | ZNF222      | - | EGFR |
| cg11038081 | 19 | 44810637 | ZNF235      | - | EGFR |
| cg02863842 | 19 | 45349685 | PVRL2       | - | EGFR |
| cg25017250 | 19 | 45445693 | APOC4-APOC2 | - | EGFR |
| cg02727285 | 19 | 45504242 | RELB        | - | EGFR |
| cg25203561 | 19 | 45541192 | CLASRP      | - | EGFR |
| cg19317638 | 19 | 45542562 | CLASRP      | - | EGFR |
| cg16855440 | 19 | 45842723 | KLC3        | - | EGFR |
| cg03883348 | 19 | 45843826 | KLC3        | - | EGFR |
| cg24278423 | 19 | 46367240 | FOXA3       | - | EGFR |
| cg11715966 | 19 | 46917255 | CCDC8       | - | EGFR |
| cg08906015 | 19 | 47157825 | DACT3       | - | EGFR |

|            |    |          |         |   |      |
|------------|----|----------|---------|---|------|
| cg15361750 | 19 | 47839132 | C5AR2   | - | EGFR |
| cg21145624 | 19 | 47922899 | MEIS3   | - | EGFR |
| cg04391540 | 19 | 48048129 | ZNF541  | - | EGFR |
| cg15109207 | 19 | 48614773 | PLA2G4C | - | EGFR |
| cg01422337 | 19 | 48752810 | CARD8   | - | EGFR |
| cg26683005 | 19 | 48752990 | CARD8   | - | EGFR |
| cg07605143 | 19 | 48827843 | EMP3    | - | EGFR |
| cg08077345 | 19 | 49372273 | PLEKHA4 | - | EGFR |
| cg17164520 | 19 | 49540241 | SNAR-G1 | - | EGFR |
| cg23995778 | 19 | 49546855 | CGB5    | - | EGFR |
| cg24908058 | 19 | 49547202 | CGB5    | - | EGFR |
| cg04115602 | 19 | 49552606 | CGB8    | - | EGFR |
| cg25485913 | 19 | 49568962 | 0       | - | EGFR |
| cg21589115 | 19 | 49867114 | DKKL1   | - | EGFR |
| cg11739626 | 19 | 50381908 | AKT1S1  | - | EGFR |
| cg14543592 | 19 | 50936703 | MYBPC2  | - | EGFR |
| cg04744379 | 19 | 51336102 | KLK15   | - | EGFR |
| cg21256656 | 19 | 51473823 | KLK6    | - | EGFR |
| cg25134071 | 19 | 51506362 | KLK8    | - | EGFR |
| cg09226684 | 19 | 51520093 | KLK10   | - | EGFR |
| cg09254939 | 19 | 51520259 | KLK10   | - | EGFR |
| cg21869055 | 19 | 51522454 | KLK10   | - | EGFR |
| cg05294243 | 19 | 51569106 | KLK13   | - | EGFR |
| cg08174003 | 19 | 53289933 | ZNF600  | - | EGFR |
| cg02440177 | 19 | 53496695 | ZNF702P | - | EGFR |
| cg19717326 | 19 | 54370016 | MYADM   | - | EGFR |
| cg06238491 | 19 | 54876446 | LAIR1   | - | EGFR |
| cg23404467 | 19 | 55235973 | KIR3DL3 | - | EGFR |
| cg20176989 | 19 | 55362650 | KIR3DL2 | - | EGFR |
| cg12952132 | 19 | 55417647 | NCR1    | - | EGFR |
| cg27105123 | 19 | 55582635 | 0       | - | EGFR |
| cg08996986 | 19 | 55583563 | 0       | - | EGFR |
| cg15916628 | 19 | 56092834 | ZNF579  | - | EGFR |
| cg14930706 | 19 | 56363105 | NLRP4   | - | EGFR |
| cg06161930 | 19 | 56633191 | ZNF787  | - | EGFR |
| cg12445208 | 19 | 56916205 | ZNF583  | - | EGFR |
| cg16547341 | 19 | 57630691 | USP29   | - | EGFR |
| cg07499372 | 19 | 57631232 | USP29   | - | EGFR |
| cg24950749 | 20 | 1310425  | SDCBP2  | - | EGFR |
| cg19133883 | 20 | 1447874  | NSFL1C  | - | EGFR |
| cg07549715 | 20 | 3024204  | GNRH2   | - | EGFR |
| cg25551168 | 20 | 3065343  | AVP     | - | EGFR |
| cg00554173 | 20 | 3149777  | LZTS3   | - | EGFR |
| cg08284598 | 20 | 3218145  | SLC4A11 | - | EGFR |
| cg06919203 | 20 | 3644151  | GFRA4   | - | EGFR |
| cg11018904 | 20 | 3762064  | SPEF1   | - | EGFR |
| cg17565490 | 20 | 3766961  | CENPB   | - | EGFR |
| cg09906458 | 20 | 4702581  | PRND    | - | EGFR |
| cg25984124 | 20 | 5106245  | PCNA    | - | EGFR |
| cg23629496 | 20 | 6034446  | LRRN4   | - | EGFR |
| cg26536259 | 20 | 6748006  | BMP2    | - | EGFR |
| cg14603345 | 20 | 11871375 | BTBD3   | - | EGFR |
| cg16537367 | 20 | 16729319 | OTOR    | - | EGFR |
| cg07334912 | 20 | 18569196 | DTD1    | - | EGFR |
| cg27132814 | 20 | 18794303 | SCP2D1  | - | EGFR |
| cg19138960 | 20 | 23066947 | CD93    | - | EGFR |
| cg21023001 | 20 | 23067088 | CD93    | - | EGFR |
| cg01539186 | 20 | 23343673 | GZF1    | - | EGFR |
| cg17928268 | 20 | 23433503 | CST11   | - | EGFR |
| cg19882093 | 20 | 23969397 | GGTLC1  | - | EGFR |
| cg13424446 | 20 | 23969432 | GGTLC1  | - | EGFR |
| cg09088834 | 20 | 25565460 | NINL    | - | EGFR |
| cg27413508 | 20 | 30225517 | COX4I2  | - | EGFR |
| cg17631429 | 20 | 30433233 | FOXS1   | - | EGFR |
| cg19145398 | 20 | 30433673 | FOXS1   | - | EGFR |
| cg08642068 | 20 | 31591776 | SUN5    | - | EGFR |
| cg02435593 | 20 | 32399369 | CHMP4B  | - | EGFR |
| cg21671476 | 20 | 35169609 | MYL9    | - | EGFR |
| cg12556134 | 20 | 35201610 | TGIF2   | - | EGFR |
| cg00714377 | 20 | 35274715 | SLA2    | - | EGFR |
| cg22437284 | 20 | 35972536 | SRC     | - | EGFR |
| cg22298088 | 20 | 36148860 | NNAT    | - | EGFR |
| cg18433380 | 20 | 36149194 | NNAT    | - | EGFR |
| cg03792653 | 20 | 36661448 | TTI1    | - | EGFR |
| cg15494458 | 20 | 36931512 | BPI     | - | EGFR |
| cg03532879 | 20 | 37209395 | ADIG    | - | EGFR |
| cg22294908 | 20 | 39928631 | ZHX3    | - | EGFR |
| cg23843505 | 20 | 42295420 | MYBL2   | - | EGFR |
| cg00431114 | 20 | 43104027 | TTPAL   | - | EGFR |
| cg00240880 | 20 | 43343233 | WISP2   | - | EGFR |
| cg06288351 | 20 | 43729897 | KCNS1   | - | EGFR |
| cg14288464 | 20 | 43743301 | WFDC5   | - | EGFR |
| cg25718438 | 20 | 43743921 | WFDC5   | - | EGFR |
| cg14448104 | 20 | 43933556 | MATN4   | - | EGFR |
| cg14226064 | 20 | 44006560 | TP53TG5 | - | EGFR |
| cg25799986 | 20 | 44098281 | WFDC2   | - | EGFR |
| cg08101264 | 20 | 44486710 | ZSWIM3  | - | EGFR |
| cg20925811 | 20 | 44638517 | MMP9    | - | EGFR |
| cg02413850 | 20 | 44993235 | SLC35C2 | - | EGFR |
| cg20150565 | 20 | 47893859 | ZFAS1   | - | EGFR |
| cg07612655 | 20 | 48185517 | PTGIS   | - | EGFR |
| cg26873164 | 20 | 48598975 | SNAI1   | - | EGFR |
| cg05403071 | 20 | 48599682 | SNAI1   | - | EGFR |
| cg16332224 | 20 | 49576406 | MOCS3   | - | EGFR |
| cg11086066 | 20 | 50159508 | NFATC2  | - | EGFR |

|            |    |          |               |   |      |
|------------|----|----------|---------------|---|------|
| cg18917378 | 20 | 52687007 | BCAS1         | - | EGFR |
| cg08927738 | 20 | 52687394 | BCAS1         | - | EGFR |
| cg13904968 | 20 | 56136012 | PCK1          | - | EGFR |
| cg12813792 | 20 | 56725695 | C20orf85      | - | EGFR |
| cg20582984 | 20 | 57417233 | GNAS          | - | EGFR |
| cg17414107 | 20 | 57427830 | GNAS          | - | EGFR |
| cg07284407 | 20 | 57429858 | GNAS          | - | EGFR |
| cg25283297 | 20 | 57430916 | GNAS          | - | EGFR |
| cg09437522 | 20 | 57431202 | GNAS          | - | EGFR |
| cg10011623 | 20 | 57463527 | GNAS          | - | EGFR |
| cg22931889 | 20 | 57594545 | TUBB1         | - | EGFR |
| cg23656380 | 20 | 60877581 | ADRM1         | - | EGFR |
| cg11682508 | 20 | 61149399 | C20orf166-AS1 | - | EGFR |
| cg21387281 | 20 | 61435439 | OGFR          | - | EGFR |
| cg15616083 | 20 | 62104607 | KCNQ2         | - | EGFR |
| cg01531431 | 20 | 62150863 | PPDPF         | - | EGFR |
| cg20732137 | 20 | 62251227 | GMEB2         | - | EGFR |
| cg03873930 | 20 | 62340664 | ZGPAT         | - | EGFR |
| cg21291985 | 20 | 62437035 | ZBTB46        | - | EGFR |
| cg26760212 | 20 | 62601743 | ZNF512B       | - | EGFR |
| cg19242268 | 20 | 62688573 | TCEA2         | - | EGFR |
| cg00344709 | 21 | 14982225 | POTED         | - | EGFR |
| cg22373097 | 21 | 32129060 | KRTAP21-1     | - | EGFR |
| cg15853125 | 21 | 32932267 | TIAM1         | - | EGFR |
| cg03801286 | 21 | 35884508 | KCNE1         | - | EGFR |
| cg18248112 | 21 | 39629123 | KCNJ15        | - | EGFR |
| cg13791713 | 21 | 40720916 | HMGN1         | - | EGFR |
| cg21553596 | 21 | 42688635 | FAM3B         | - | EGFR |
| cg08009711 | 21 | 43346184 | C2CD2         | - | EGFR |
| cg01214847 | 21 | 43816086 | TMPRSS3       | - | EGFR |
| cg25608949 | 21 | 43816355 | TMPRSS3       | - | EGFR |
| cg13265003 | 21 | 43919023 | SLC37A1       | - | EGFR |
| cg09622447 | 21 | 44496378 | CBS           | - | EGFR |
| cg19378039 | 21 | 44589331 | CRYAA         | - | EGFR |
| cg05965188 | 21 | 45078342 | HSF2BP        | - | EGFR |
| cg23185262 | 21 | 45137544 | PDXK          | - | EGFR |
| cg01605783 | 21 | 45232587 | LOC284837     | - | EGFR |
| cg18876487 | 21 | 45706101 | AIRE          | - | EGFR |
| cg21053323 | 21 | 46237385 | SUMO3         | - | EGFR |
| cg24167037 | 21 | 46340776 | ITGB2-AS1     | - | EGFR |
| cg04790129 | 21 | 46340810 | ITGB2-AS1     | - | EGFR |
| cg21968796 | 21 | 46358532 | C21orf67      | - | EGFR |
| cg09676390 | 21 | 46493345 | SSR4P1        | - | EGFR |
| cg16319213 | 21 | 47742881 | C21orf58      | - | EGFR |
| cg15188688 | 22 | 19468342 | CDC45         | - | EGFR |
| cg04463638 | 22 | 19512712 | CLDN5         | - | EGFR |
| cg22377998 | 22 | 20004881 | ARVCF         | - | EGFR |
| cg11594228 | 22 | 20103649 | RANBP1        | - | EGFR |
| cg19669036 | 22 | 21212365 | PI4KA         | - | EGFR |
| cg08088989 | 22 | 22874447 | ZNF280A       | - | EGFR |
| cg08709385 | 22 | 22986667 | POM121L1P     | - | EGFR |
| cg19764436 | 22 | 23413260 | GNAX          | - | EGFR |
| cg12406417 | 22 | 23522551 | BCR           | - | EGFR |
| cg03599338 | 22 | 24577315 | SUSD2         | - | EGFR |
| cg23349242 | 22 | 24577448 | SUSD2         | - | EGFR |
| cg02774160 | 22 | 24979633 | GGT1          | - | EGFR |
| cg03642357 | 22 | 25960278 | ADRBK2        | - | EGFR |
| cg19831369 | 22 | 26881026 | SRRD          | - | EGFR |
| cg07849904 | 22 | 28197796 | MN1           | - | EGFR |
| cg20256494 | 22 | 30116439 | CABP7         | - | EGFR |
| cg27060381 | 22 | 30723363 | TBC1D10A      | - | EGFR |
| cg18294257 | 22 | 30867673 | SEC14L3       | - | EGFR |
| cg20436912 | 22 | 30902642 | SEC14L4       | - | EGFR |
| cg09022808 | 22 | 30960857 | GAL3ST1       | - | EGFR |
| cg26233253 | 22 | 31032613 | SLC35E4       | - | EGFR |
| cg27324619 | 22 | 31518860 | INPP5J        | - | EGFR |
| cg00727590 | 22 | 31536549 | PLA2G3        | - | EGFR |
| cg03962522 | 22 | 32439254 | SLC5A1        | - | EGFR |
| cg24080529 | 22 | 33197034 | TIMP3         | - | EGFR |
| cg11835355 | 22 | 36561746 | APOL3         | - | EGFR |
| cg21209356 | 22 | 37319042 | CSF2RB        | - | EGFR |
| cg22088368 | 22 | 37404888 | TEX33         | - | EGFR |
| cg00556408 | 22 | 37500588 | TMPRSS6       | - | EGFR |
| cg18265887 | 22 | 37640250 | RAC2          | - | EGFR |
| cg21402035 | 22 | 38219400 | GALR3         | - | EGFR |
| cg23621115 | 22 | 38452869 | PICK1         | - | EGFR |
| cg20439022 | 22 | 38478787 | SLC16A8       | - | EGFR |
| cg22954818 | 22 | 39354115 | APOBEC3A      | - | EGFR |
| cg02002676 | 22 | 39378440 | APOBEC3B      | - | EGFR |
| cg08245789 | 22 | 40289538 | ENTHD1        | - | EGFR |
| cg21342728 | 22 | 41075673 | MCHR1         | - | EGFR |
| cg18291690 | 22 | 41252751 | ST13          | - | EGFR |
| cg20655558 | 22 | 41257839 | DNAJB7        | - | EGFR |
| cg10115873 | 22 | 41258407 | DNAJB7        | - | EGFR |
| cg18174542 | 22 | 41956861 | CSDC2         | - | EGFR |
| cg25447894 | 22 | 41957443 | CSDC2         | - | EGFR |
| cg23325242 | 22 | 43044788 | CYB5R3        | - | EGFR |
| cg08954856 | 22 | 43506306 | BIK           | - | EGFR |
| cg15612436 | 22 | 43897902 | MPPED1        | - | EGFR |
| cg06849477 | 22 | 45072724 | PRR5          | - | EGFR |
| cg11529250 | 22 | 45680606 | UPK3A         | - | EGFR |
| cg11523020 | 22 | 45681036 | UPK3A         | - | EGFR |
| cg13438834 | 22 | 45706530 | FAM118A       | - | EGFR |
| cg20269537 | 22 | 46067074 | ATXN10        | - | EGFR |
| cg27032184 | 22 | 46731129 | TRMU          | - | EGFR |

|            |    |           |             |   |              |
|------------|----|-----------|-------------|---|--------------|
| cg06268694 | 22 | 46932642  | CELSR1      | - | EGFR         |
| cg18638931 | 22 | 50528179  | MOV10L1     | - | EGFR         |
| cg11896271 | 22 | 50609327  | PANX2       | - | EGFR         |
| cg00083937 | 22 | 51039805  | MAPK8IP2    | - | EGFR         |
| cg22467071 | 0  | 0         | 0           | - | EGFR         |
| cg06214007 | 1  | 89829308  | GBP6        | - | ALK          |
| cg01169610 | 2  | 99135471  | INPP4A      | - | ALK          |
| cg09022993 | 4  | 52917875  | SPATA18     | - | ALK          |
| cg08241785 | 5  | 75919281  | F2RL2       | - | ALK          |
| cg07572435 | 8  | 143868013 | LY6D        | - | ALK          |
| cg07211259 | 9  | 5510497   | PDCD1LG2    | - | ALK          |
| cg24794433 | 9  | 124462172 | DAB2IP      | - | ALK          |
| cg27218220 | 9  | 124856396 | TLL11       | - | ALK          |
| cg26491484 | 9  | 133885058 | LAMC3       | - | ALK          |
| cg04041960 | 10 | 121301765 | RGS10       | - | ALK          |
| cg14542839 | 11 | 35547074  | PAMR1       | - | ALK          |
| cg17580045 | 12 | 4384890   | CCND2       | - | ALK          |
| cg15996947 | 14 | 50780115  | ATP5S       | - | ALK          |
| cg21460582 | 15 | 76005861  | CSPG4       | - | ALK          |
| cg00840403 | 16 | 71560205  | CHST4       | - | ALK          |
| cg14296374 | 16 | 83841139  | HSBP1       | - | ALK          |
| cg09357097 | 17 | 46688490  | HOXB7       | - | ALK          |
| cg19961522 | 20 | 30407388  | MYLK2       | - | ALK          |
| cg00512031 | 4  | 5021976   | CYTL1       | - | KRAS         |
| cg13494498 | 16 | 89990214  | TUBB3       | - | KRAS         |
| cg21541083 | 19 | 7701212   | STXBP2      | - | KRAS         |
| cg03027037 | 20 | 23402404  | NAPB        | - | KRAS         |
| cg18641050 | 10 | 102045846 | BLOC1S2     | - | ROS1         |
| cg14221831 | 16 | 66952714  | CDH16       | - | ROS1         |
| cg02164386 | 17 | 42925536  | HIGD1B      | - | ROS1         |
| cg01454134 | 19 | 56686707  | GALP        | - | ROS1         |
| cg18640030 | 8  | 67090752  | CRH         | - | HER2         |
| cg03699566 | 11 | 71900652  | FOLR1       | - | HER2         |
| cg21846903 | 17 | 26697281  | VTN         | - | HER2         |
| cg14667273 | 1  | 1369934   | VWA1        | - | pan-negative |
| cg09044743 | 1  | 2458238   | PANK4       | - | pan-negative |
| cg27285616 | 1  | 2487110   | TNFRSF14    | - | pan-negative |
| cg03568718 | 1  | 3579873   | TP73        | - | pan-negative |
| cg21906716 | 1  | 3579978   | TP73        | - | pan-negative |
| cg16607065 | 1  | 3607222   | TP73        | - | pan-negative |
| cg26208930 | 1  | 3607425   | TP73        | - | pan-negative |
| cg21927975 | 1  | 6320757   | GPR153      | - | pan-negative |
| cg04818845 | 1  | 6580167   | PLEKHG5     | - | pan-negative |
| cg07483064 | 1  | 8938751   | ENO1-AS1    | - | pan-negative |
| cg02981703 | 1  | 9005734   | CA6         | - | pan-negative |
| cg25919221 | 1  | 9006680   | CA6         | - | pan-negative |
| cg24027679 | 1  | 9086621   | SLC2A7      | - | pan-negative |
| cg03427831 | 1  | 11867453  | MTHFR       | - | pan-negative |
| cg15952725 | 1  | 15783190  | CELA2A      | - | pan-negative |
| cg01459162 | 1  | 17574330  | PADI3       | - | pan-negative |
| cg18524091 | 1  | 19185772  | TAS1R2      | - | pan-negative |
| cg21731286 | 1  | 19186805  | TAS1R2      | - | pan-negative |
| cg14238120 | 1  | 22328026  | CELA3A      | - | pan-negative |
| cg00108454 | 1  | 22963614  | C1QA        | - | pan-negative |
| cg16529592 | 1  | 25292215  | RUNX3       | - | pan-negative |
| cg02327719 | 1  | 26185386  | AUNIP       | - | pan-negative |
| cg16068833 | 1  | 26644515  | CD52        | - | pan-negative |
| cg15665653 | 1  | 27561270  | WDTC1       | - | pan-negative |
| cg24354652 | 1  | 28502908  | PTAFR       | - | pan-negative |
| cg08450168 | 1  | 28918231  | RAB42       | - | pan-negative |
| cg21093060 | 1  | 32644693  | TXLNA       | - | pan-negative |
| cg17339202 | 1  | 33160900  | SYNC        | - | pan-negative |
| cg23886755 | 1  | 33841166  | PHC2        | - | pan-negative |
| cg21198021 | 1  | 33841581  | PHC2        | - | pan-negative |
| cg26372517 | 1  | 36039159  | TFAP2E      | - | pan-negative |
| cg03260744 | 1  | 36549062  | TEKT2       | - | pan-negative |
| cg24813212 | 1  | 36549726  | TEKT2       | - | pan-negative |
| cg07388493 | 1  | 39491459  | NDUFS5      | - | pan-negative |
| cg01656955 | 1  | 40137966  | NT5C1A      | - | pan-negative |
| cg22005565 | 1  | 41487437  | SLFN1       | - | pan-negative |
| cg19728577 | 1  | 42619163  | GUCA2B      | - | pan-negative |
| cg22607339 | 1  | 43803159  | MPL         | - | pan-negative |
| cg21578207 | 1  | 44870088  | RNF220      | - | pan-negative |
| cg09799156 | 1  | 45253079  | BEST4       | - | pan-negative |
| cg26781150 | 1  | 45792542  | HPDL        | - | pan-negative |
| cg09914444 | 1  | 46972183  | DMBX1       | - | pan-negative |
| cg23440155 | 1  | 47264601  | CYP4B1      | - | pan-negative |
| cg26227005 | 1  | 50574517  | ELAVL4      | - | pan-negative |
| cg16557944 | 1  | 53068197  | GPX7        | - | pan-negative |
| cg06941093 | 1  | 54199696  | GLIS1       | - | pan-negative |
| cg21142398 | 1  | 54200078  | GLIS1       | - | pan-negative |
| cg03886898 | 1  | 54359132  | DIO1        | - | pan-negative |
| cg06007645 | 1  | 55107421  | HEATR8-TTC4 | - | pan-negative |
| cg24697184 | 1  | 55266578  | TTC22       | - | pan-negative |
| cg25957967 | 1  | 55505148  | PCSK9       | - | pan-negative |
| cg16648841 | 1  | 57320685  | C8A         | - | pan-negative |
| cg10620457 | 1  | 57432110  | C8B         | - | pan-negative |
| cg26851374 | 1  | 57432150  | C8B         | - | pan-negative |
| cg26764244 | 1  | 68299511  | GNG12       | - | pan-negative |
| cg03641225 | 1  | 68512539  | DIRAS3      | - | pan-negative |
| cg06201642 | 1  | 77333198  | ST6GALNAC5  | - | pan-negative |
| cg24574111 | 1  | 85331084  | LPAR3       | - | pan-negative |
| cg05654164 | 1  | 85725892  | C1orf52     | - | pan-negative |
| cg05475904 | 1  | 85743377  | BCL10       | - | pan-negative |
| cg03714397 | 1  | 91818834  | HFM1        | - | pan-negative |

|            |   |           |              |   |              |
|------------|---|-----------|--------------|---|--------------|
| cg18127191 | 1 | 91966734  | CDC7         | - | pan-negative |
| cg02748427 | 1 | 92764574  | GLMN         | - | pan-negative |
| cg22807700 | 1 | 94345672  | DNTTIP2      | - | pan-negative |
| cg04592706 | 1 | 94586592  | ABCA4        | - | pan-negative |
| cg11952714 | 1 | 99126623  | SNX7         | - | pan-negative |
| cg00729875 | 1 | 100111713 | PALMD        | - | pan-negative |
| cg22215192 | 1 | 104160257 | AMY2A        | - | pan-negative |
| cg21919219 | 1 | 104197899 | AMY1A        | - | pan-negative |
| cg08253405 | 1 | 109401072 | AKNAD1       | - | pan-negative |
| cg05675373 | 1 | 110754257 | KCNC4        | - | pan-negative |
| cg24641737 | 1 | 111743271 | DENND2D      | - | pan-negative |
| cg10500716 | 1 | 111993148 | WDR77        | - | pan-negative |
| cg02947253 | 1 | 112046700 | ADORA3       | - | pan-negative |
| cg23301687 | 1 | 112162068 | RAP1A        | - | pan-negative |
| cg09276363 | 1 | 112531488 | KCND3        | - | pan-negative |
| cg03364504 | 1 | 113393176 | LOC100996702 | - | pan-negative |
| cg09058542 | 1 | 115572863 | TSHB         | - | pan-negative |
| cg06043114 | 1 | 115632455 | TSPAN2       | - | pan-negative |
| cg00819310 | 1 | 116193783 | VANGL1       | - | pan-negative |
| cg14841875 | 1 | 116916411 | ATP1A1       | - | pan-negative |
| cg16719404 | 1 | 117296242 | CD2          | - | pan-negative |
| cg23953831 | 1 | 117544416 | CD101        | - | pan-negative |
| cg16175792 | 1 | 120050104 | HSD3B1       | - | pan-negative |
| cg11120551 | 1 | 146713996 | CHD1L        | - | pan-negative |
| cg26093148 | 1 | 151690075 | CELF3        | - | pan-negative |
| cg07039113 | 1 | 153329013 | S100A9       | - | pan-negative |
| cg24490338 | 1 | 154164054 | TPM3         | - | pan-negative |
| cg00818872 | 1 | 154540271 | CHRNA2       | - | pan-negative |
| cg11902458 | 1 | 154842746 | KCNN3        | - | pan-negative |
| cg10946435 | 1 | 154843044 | KCNN3        | - | pan-negative |
| cg01782486 | 1 | 154986512 | ZBTB7B       | - | pan-negative |
| cg25412453 | 1 | 155006219 | DCST2        | - | pan-negative |
| cg25446086 | 1 | 155829549 | SYT11        | - | pan-negative |
| cg17155167 | 1 | 155881046 | RIT1         | - | pan-negative |
| cg06251129 | 1 | 155990657 | SSR2         | - | pan-negative |
| cg05898524 | 1 | 156083276 | LMNA         | - | pan-negative |
| cg13282594 | 1 | 156211609 | BGLAP        | - | pan-negative |
| cg18993334 | 1 | 156307348 | TSACC        | - | pan-negative |
| cg20839149 | 1 | 156786601 | SH2D2A       | - | pan-negative |
| cg12499211 | 1 | 156786643 | SH2D2A       | - | pan-negative |
| cg01612158 | 1 | 157567720 | FCRL4        | - | pan-negative |
| cg17281600 | 1 | 157568591 | FCRL4        | - | pan-negative |
| cg26928603 | 1 | 157963176 | KIRREL       | - | pan-negative |
| cg13765621 | 1 | 158149228 | CD1D         | - | pan-negative |
| cg07950803 | 1 | 158223934 | CD1A         | - | pan-negative |
| cg09547777 | 1 | 160160232 | CASQ1        | - | pan-negative |
| cg00327483 | 1 | 160160587 | CASQ1        | - | pan-negative |
| cg00689010 | 1 | 160311893 | NCSTN        | - | pan-negative |
| cg12529228 | 1 | 160336994 | NHLH1        | - | pan-negative |
| cg16776350 | 1 | 160549158 | CD84         | - | pan-negative |
| cg20535085 | 1 | 160616604 | SLAMF1       | - | pan-negative |
| cg13311440 | 1 | 160681404 | CD48         | - | pan-negative |
| cg01367992 | 1 | 160766535 | LY9          | - | pan-negative |
| cg18641937 | 1 | 160924389 | ITLN2        | - | pan-negative |
| cg01774645 | 1 | 161040044 | ARHGAP30     | - | pan-negative |
| cg24192663 | 1 | 161493011 | HSPA6        | - | pan-negative |
| cg22202141 | 1 | 161520591 | FCGR3A       | - | pan-negative |
| cg24901474 | 1 | 163173040 | RGS5         | - | pan-negative |
| cg14046986 | 1 | 167599371 | RCSD1        | - | pan-negative |
| cg19853494 | 1 | 169680613 | SELL         | - | pan-negative |
| cg25778166 | 1 | 171059935 | FMO3         | - | pan-negative |
| cg10161121 | 1 | 172628020 | FASLG        | - | pan-negative |
| cg05936800 | 1 | 173020492 | TNFSF18      | - | pan-negative |
| cg01770400 | 1 | 173886485 | SERPINC1     | - | pan-negative |
| cg16743289 | 1 | 174968144 | CACYBP       | - | pan-negative |
| cg19399532 | 1 | 178512495 | C1orf220     | - | pan-negative |
| cg10559803 | 1 | 178693897 | RALGFS2      | - | pan-negative |
| cg01426743 | 1 | 178994243 | FAM20B       | - | pan-negative |
| cg06025017 | 1 | 182419218 | RGS1         | - | pan-negative |
| cg17124700 | 1 | 182642748 | RGS8         | - | pan-negative |
| cg09076123 | 1 | 183559527 | NCF2         | - | pan-negative |
| cg04788442 | 1 | 186265397 | PRG4         | - | pan-negative |
| cg03160309 | 1 | 186650080 | PTGS2        | - | pan-negative |
| cg24974599 | 1 | 196620428 | CFH          | - | pan-negative |
| cg08008403 | 1 | 197881741 | LHX9         | - | pan-negative |
| cg21171615 | 1 | 198607548 | PTPRC        | - | pan-negative |
| cg18330203 | 1 | 201346647 | TNNT2        | - | pan-negative |
| cg12114524 | 1 | 201390794 | TNNI1        | - | pan-negative |
| cg20771670 | 1 | 201438018 | PHLDA3       | - | pan-negative |
| cg18384097 | 1 | 202129566 | PTPN7        | - | pan-negative |
| cg13735697 | 1 | 203055296 | MYOG         | - | pan-negative |
| cg13626881 | 1 | 203059178 | 0            | - | pan-negative |
| cg02901679 | 1 | 206945999 | IL10         | - | pan-negative |
| cg11037818 | 1 | 208041879 | 0            | - | pan-negative |
| cg09276883 | 1 | 210501966 | HHAT         | - | pan-negative |
| cg00658007 | 1 | 211666129 | RD3          | - | pan-negative |
| cg10531372 | 1 | 212798363 | FAM71A       | - | pan-negative |
| cg21421701 | 1 | 212872679 | BATF3        | - | pan-negative |
| cg03455458 | 1 | 213124545 | VASH2        | - | pan-negative |
| cg22176895 | 1 | 214162039 | PROX1        | - | pan-negative |
| cg04683240 | 1 | 221052886 | HLX          | - | pan-negative |
| cg16307860 | 1 | 222886951 | BROX         | - | pan-negative |
| cg14607642 | 1 | 225617030 | LBR          | - | pan-negative |
| cg21430666 | 1 | 228613073 | HIST3H3      | - | pan-negative |
| cg15459773 | 1 | 231472445 | EXOC8        | - | pan-negative |

|            |   |           |          |   |              |
|------------|---|-----------|----------|---|--------------|
| cg16240480 | 1 | 236557473 | EDARADD  | - | pan-negative |
| cg19764418 | 1 | 237205098 | RYR2     | - | pan-negative |
| cg17461214 | 1 | 241799063 | CHML     | - | pan-negative |
| cg06461848 | 1 | 241846190 | WDR64    | - | pan-negative |
| cg09998519 | 1 | 245028194 | HNRNPU   | - | pan-negative |
| cg14865868 | 2 | 12856040  | TRIB2    | - | pan-negative |
| cg25306927 | 2 | 17721751  | VSNL1    | - | pan-negative |
| cg05899618 | 2 | 20865847  | GDF7     | - | pan-negative |
| cg25477928 | 2 | 24583610  | ITSN2    | - | pan-negative |
| cg21629895 | 2 | 25565795  | DNMT3A   | - | pan-negative |
| cg06112415 | 2 | 27342158  | CGREF1   | - | pan-negative |
| cg06288632 | 2 | 27358152  | PREB     | - | pan-negative |
| cg16964535 | 2 | 27498334  | DNAJC5G  | - | pan-negative |
| cg18712919 | 2 | 28112170  | RBKS     | - | pan-negative |
| cg01777397 | 2 | 29337946  | CLIP4    | - | pan-negative |
| cg05761971 | 2 | 38177677  | RMDN2    | - | pan-negative |
| cg05275752 | 2 | 38892887  | GALM     | - | pan-negative |
| cg20697204 | 2 | 47382593  | C2orf61  | - | pan-negative |
| cg05010058 | 2 | 65284262  | CEP68    | - | pan-negative |
| cg04872689 | 2 | 68592375  | PLEK     | - | pan-negative |
| cg13468685 | 2 | 68592737  | PLEK     | - | pan-negative |
| cg15258980 | 2 | 68961597  | ARHGAP25 | - | pan-negative |
| cg09721047 | 2 | 68962012  | ARHGAP25 | - | pan-negative |
| cg12711530 | 2 | 69099285  | BMP10    | - | pan-negative |
| cg12374431 | 2 | 71126953  | VAX2     | - | pan-negative |
| cg18006568 | 2 | 71205891  | ANKRD53  | - | pan-negative |
| cg00945862 | 2 | 74570240  | SLC4A5   | - | pan-negative |
| cg02034222 | 2 | 74753281  | DQX1     | - | pan-negative |
| cg18638581 | 2 | 75059602  | HK2      | - | pan-negative |
| cg04881903 | 2 | 85637116  | CAPG     | - | pan-negative |
| cg10664272 | 2 | 85638053  | CAPG     | - | pan-negative |
| cg11752275 | 2 | 85921036  | GNLY     | - | pan-negative |
| cg10198837 | 2 | 87090202  | CD8B     | - | pan-negative |
| cg05301852 | 2 | 88427827  | FABP1    | - | pan-negative |
| cg06668300 | 2 | 95691755  | MAL      | - | pan-negative |
| cg18793806 | 2 | 95826087  | ZNF514   | - | pan-negative |
| cg15495837 | 2 | 96256880  | TRIM43   | - | pan-negative |
| cg26625319 | 2 | 97001960  | NCAPH    | - | pan-negative |
| cg15954792 | 2 | 98986971  | CNGA3    | - | pan-negative |
| cg15612847 | 2 | 99796318  | MITD1    | - | pan-negative |
| cg02947354 | 2 | 99917392  | LYG1     | - | pan-negative |
| cg12293634 | 2 | 101924667 | RNF149   | - | pan-negative |
| cg22415472 | 2 | 108602361 | SLC5A7   | - | pan-negative |
| cg00839584 | 2 | 113542091 | IL1A     | - | pan-negative |
| cg27083787 | 2 | 113543245 | IL1A     | - | pan-negative |
| cg15836722 | 2 | 113593785 | IL1B     | - | pan-negative |
| cg02229946 | 2 | 113669912 | IL37     | - | pan-negative |
| cg10269439 | 2 | 113670582 | IL37     | - | pan-negative |
| cg10938446 | 2 | 113875723 | IL1RN    | - | pan-negative |
| cg15733266 | 2 | 118775305 | 0        | - | pan-negative |
| cg04749104 | 2 | 119981169 | STEAP3   | - | pan-negative |
| cg15250797 | 2 | 120281526 | SCTR     | - | pan-negative |
| cg09204187 | 2 | 130940668 | SMPD4    | - | pan-negative |
| cg14290291 | 2 | 130940680 | SMPD4    | - | pan-negative |
| cg26385743 | 2 | 131101463 | IMP4     | - | pan-negative |
| cg05184394 | 2 | 131512773 | AMER3    | - | pan-negative |
| cg08946117 | 2 | 132560175 | C2orf27B | - | pan-negative |
| cg26091981 | 2 | 136594866 | LCT      | - | pan-negative |
| cg05010623 | 2 | 158485762 | ACVR1C   | - | pan-negative |
| cg23871659 | 2 | 161993364 | TANK     | - | pan-negative |
| cg07348311 | 2 | 163174896 | IFIH1    | - | pan-negative |
| cg10731149 | 2 | 172378686 | CYBRD1   | - | pan-negative |
| cg08654334 | 2 | 189655589 | DIRC1    | - | pan-negative |
| cg25753817 | 2 | 191208232 | INPP1    | - | pan-negative |
| cg15096140 | 2 | 192109731 | MYO1B    | - | pan-negative |
| cg15780361 | 2 | 202484098 | ALS2CR11 | - | pan-negative |
| cg13384498 | 2 | 209010629 | CRYGB    | - | pan-negative |
| cg22037121 | 2 | 210635618 | UNC80    | - | pan-negative |
| cg12591323 | 2 | 212728609 | SMARCAL1 | - | pan-negative |
| cg07719512 | 2 | 219246576 | SLC11A1  | - | pan-negative |
| cg20398120 | 2 | 219696690 | PRKAG3   | - | pan-negative |
| cg20888386 | 2 | 219858260 | CRYBA2   | - | pan-negative |
| cg19394737 | 2 | 219892361 | CCDC108  | - | pan-negative |
| cg13379763 | 2 | 219892516 | CCDC108  | - | pan-negative |
| cg15278948 | 2 | 220071103 | ZFAND2B  | - | pan-negative |
| cg16222568 | 2 | 220308071 | SPEG     | - | pan-negative |
| cg19504888 | 2 | 228191306 | MFF      | - | pan-negative |
| cg21577049 | 2 | 228736449 | DAW1     | - | pan-negative |
| cg06874144 | 2 | 231576873 | CAB39    | - | pan-negative |
| cg00314943 | 2 | 233270750 | ALPPL2   | - | pan-negative |
| cg05423257 | 2 | 233321600 | ALPI     | - | pan-negative |
| cg23338993 | 2 | 234600423 | UGT1A6   | - | pan-negative |
| cg21137417 | 2 | 234959456 | SPP2     | - | pan-negative |
| cg09039163 | 2 | 239009036 | ESPNL    | - | pan-negative |
| cg15319457 | 2 | 239148132 | HES6     | - | pan-negative |
| cg05020203 | 2 | 242968829 | 0        | - | pan-negative |
| cg10503138 | 3 | 2142391   | CNTN4    | - | pan-negative |
| cg10159529 | 3 | 3152530   | IL5RA    | - | pan-negative |
| cg08935301 | 3 | 8543732   | LMCD1    | - | pan-negative |
| cg22959932 | 3 | 8693706   | SSUH2    | - | pan-negative |
| cg25781123 | 3 | 9404598   | THUMPD3  | - | pan-negative |
| cg05845178 | 3 | 9957531   | IL17RC   | - | pan-negative |
| cg22782492 | 3 | 10184007  | VHL      | - | pan-negative |
| cg14375111 | 3 | 14165186  | CHCHD4   | - | pan-negative |
| cg06429195 | 3 | 16646582  | DAZL     | - | pan-negative |

|            |   |           |              |   |              |
|------------|---|-----------|--------------|---|--------------|
| cg00674922 | 3 | 18465772  | SATB1        | - | pan-negative |
| cg18047970 | 3 | 30893036  | GADL1        | - | pan-negative |
| cg18602811 | 3 | 32612253  | DYNC1L1      | - | pan-negative |
| cg21942438 | 3 | 40518091  | ZNF619       | - | pan-negative |
| cg11080718 | 3 | 42846415  | HIGD1A       | - | pan-negative |
| cg21979032 | 3 | 42917517  | CYP8B1       | - | pan-negative |
| cg18129786 | 3 | 44519983  | ZNF445       | - | pan-negative |
| cg06186861 | 3 | 44771174  | ZNF501       | - | pan-negative |
| cg01442426 | 3 | 46069366  | XCR1         | - | pan-negative |
| cg05125838 | 3 | 48601585  | UCN2         | - | pan-negative |
| cg13585240 | 3 | 48959375  | ARIH2        | - | pan-negative |
| cg06613840 | 3 | 49395574  | GPX1         | - | pan-negative |
| cg17272094 | 3 | 50317223  | LSMEM2       | - | pan-negative |
| cg08996521 | 3 | 50649994  | MAPKAPK3     | - | pan-negative |
| cg09604428 | 3 | 52721277  | GNL3         | - | pan-negative |
| cg01942127 | 3 | 53529259  | CACNA1D      | - | pan-negative |
| cg23154064 | 3 | 56699146  | FAM208A      | - | pan-negative |
| cg00563845 | 3 | 58318305  | PXK          | - | pan-negative |
| cg04835638 | 3 | 60363505  | FHIT         | - | pan-negative |
| cg02105377 | 3 | 66024554  | MAGI1        | - | pan-negative |
| cg12775613 | 3 | 88040034  | HTR1F        | - | pan-negative |
| cg03277051 | 3 | 99356666  | COL8A1       | - | pan-negative |
| cg27585441 | 3 | 107096886 | CCDC54       | - | pan-negative |
| cg11759378 | 3 | 109035469 | DPPA2        | - | pan-negative |
| cg15786541 | 3 | 110791063 | PVRL3        | - | pan-negative |
| cg20126106 | 3 | 111718135 | TAGLN3       | - | pan-negative |
| cg10523671 | 3 | 121612956 | SLC15A2      | - | pan-negative |
| cg18636558 | 3 | 121613703 | SLC15A2      | - | pan-negative |
| cg11874272 | 3 | 121773564 | CD86         | - | pan-negative |
| cg17453778 | 3 | 121902561 | CASR         | - | pan-negative |
| cg26928972 | 3 | 122043799 | CSTA         | - | pan-negative |
| cg10430690 | 3 | 123813596 | KALRN        | - | pan-negative |
| cg07621456 | 3 | 128749537 | EFCC1        | - | pan-negative |
| cg13180098 | 3 | 129246923 | RHO          | - | pan-negative |
| cg15120497 | 3 | 129692899 | TRH          | - | pan-negative |
| cg10453758 | 3 | 132380190 | UBA5         | - | pan-negative |
| cg24820508 | 3 | 138048370 | NME9         | - | pan-negative |
| cg21951612 | 3 | 138092089 | MRAS         | - | pan-negative |
| cg16050349 | 3 | 138478129 | PIK3CB       | - | pan-negative |
| cg06543018 | 3 | 139258822 | RBP1         | - | pan-negative |
| cg00995327 | 3 | 142838847 | CHST2        | - | pan-negative |
| cg10557828 | 3 | 145879642 | PLOD2        | - | pan-negative |
| cg24315815 | 3 | 145969579 | PLSCR4       | - | pan-negative |
| cg03075662 | 3 | 146213648 | PLSCR2       | - | pan-negative |
| cg13424229 | 3 | 148581837 | CPA3         | - | pan-negative |
| cg24290574 | 3 | 148583152 | CPA3         | - | pan-negative |
| cg15423862 | 3 | 155838109 | KCNAB1       | - | pan-negative |
| cg05743054 | 3 | 158288903 | MLF1         | - | pan-negative |
| cg04691961 | 3 | 161091175 | SPTSSB       | - | pan-negative |
| cg00119079 | 3 | 182880278 | LAMP3        | - | pan-negative |
| cg14483391 | 3 | 183749227 | HTR3D        | - | pan-negative |
| cg22700017 | 3 | 183979894 | CAMK2N2      | - | pan-negative |
| cg22833027 | 3 | 184098790 | CHRD         | - | pan-negative |
| cg19682367 | 3 | 188888486 | TPRG1        | - | pan-negative |
| cg02121427 | 3 | 194091192 | LRRRC15      | - | pan-negative |
| cg13185177 | 3 | 194119885 | GP5          | - | pan-negative |
| cg05473677 | 3 | 195943713 | SLC51A       | - | pan-negative |
| cg05556202 | 3 | 196065106 | TM4SF19      | - | pan-negative |
| cg05445326 | 3 | 196065569 | TM4SF19      | - | pan-negative |
| cg24789424 | 3 | 197300143 | BDH1         | - | pan-negative |
| cg00010193 | 4 | 1145216   | 0            | - | pan-negative |
| cg21505886 | 4 | 1724428   | TACC3        | - | pan-negative |
| cg02089348 | 4 | 1724449   | TACC3        | - | pan-negative |
| cg17269277 | 4 | 1796142   | FGFR3        | - | pan-negative |
| cg03115746 | 4 | 1895023   | WHSC1        | - | pan-negative |
| cg18130069 | 4 | 3315422   | RGS12        | - | pan-negative |
| cg00344372 | 4 | 3443625   | HGFAC        | - | pan-negative |
| cg22266967 | 4 | 6695698   | S100P        | - | pan-negative |
| cg19564367 | 4 | 7941852   | AFAP1        | - | pan-negative |
| cg12707353 | 4 | 8440629   | ACOX3        | - | pan-negative |
| cg20576510 | 4 | 16077324  | PROM1        | - | pan-negative |
| cg22496254 | 4 | 17811165  | DCAF16       | - | pan-negative |
| cg10307548 | 4 | 24795830  | SOD3         | - | pan-negative |
| cg04353483 | 4 | 26493496  | CCKAR        | - | pan-negative |
| cg03430998 | 4 | 38807057  | TLR1         | - | pan-negative |
| cg20484352 | 4 | 38869779  | FAM114A1     | - | pan-negative |
| cg21152662 | 4 | 48231543  | TEC          | - | pan-negative |
| cg19283196 | 4 | 48485233  | SLC10A4      | - | pan-negative |
| cg13701273 | 4 | 66535780  | LOC100144602 | - | pan-negative |
| cg06399881 | 4 | 69111391  | TMPRSS11B    | - | pan-negative |
| cg03498559 | 4 | 70361062  | UGT2B4       | - | pan-negative |
| cg04276232 | 4 | 70362022  | UGT2B4       | - | pan-negative |
| cg09096383 | 4 | 70796842  | CSN1S1       | - | pan-negative |
| cg19666391 | 4 | 71383307  | AMTN         | - | pan-negative |
| cg17536071 | 4 | 71383999  | AMTN         | - | pan-negative |
| cg12952136 | 4 | 71705777  | GRSF1        | - | pan-negative |
| cg07376029 | 4 | 72650992  | GC           | - | pan-negative |
| cg20357806 | 4 | 74853779  | PPBP         | - | pan-negative |
| cg01049530 | 4 | 81952008  | BMP3         | - | pan-negative |
| cg13873733 | 4 | 83352560  | ENOPH1       | - | pan-negative |
| cg26359204 | 4 | 85419877  | NKX6-1       | - | pan-negative |
| cg11826486 | 4 | 91761695  | CCSER1       | - | pan-negative |
| cg06425515 | 4 | 100356035 | ADH7         | - | pan-negative |
| cg11469321 | 4 | 104021294 | BDH2         | - | pan-negative |
| cg12243271 | 4 | 110722702 | CFI          | - | pan-negative |

|            |   |           |           |   |              |
|------------|---|-----------|-----------|---|--------------|
| cg20773127 | 4 | 111397155 | ENPEP     | - | pan-negative |
| cg17854440 | 4 | 111397581 | ENPEP     | - | pan-negative |
| cg20950277 | 4 | 122085241 | TNIP3     | - | pan-negative |
| cg09526693 | 4 | 123378308 | IL2       | - | pan-negative |
| cg12452946 | 4 | 128886867 | MFSD8     | - | pan-negative |
| cg02688643 | 4 | 140585523 | MGST2     | - | pan-negative |
| cg07786760 | 4 | 155412677 | DCHS2     | - | pan-negative |
| cg23303074 | 4 | 155665625 | LRAT      | - | pan-negative |
| cg02210887 | 4 | 156586680 | GUCY1A3   | - | pan-negative |
| cg14401592 | 4 | 156787800 | ASIC5     | - | pan-negative |
| cg18023724 | 4 | 164088493 | NAF1      | - | pan-negative |
| cg23679141 | 4 | 165118930 | ANP32C    | - | pan-negative |
| cg05348123 | 4 | 174321584 | SCRG1     | - | pan-negative |
| cg21094669 | 4 | 175750109 | GLRA3     | - | pan-negative |
| cg18443378 | 4 | 176986950 | WDR17     | - | pan-negative |
| cg11674404 | 4 | 176987359 | WDR17     | - | pan-negative |
| cg24399106 | 4 | 183065224 | MGC45800  | - | pan-negative |
| cg26583078 | 4 | 186877778 | SORBS2    | - | pan-negative |
| cg24441350 | 5 | 694015    | TPPP      | - | pan-negative |
| cg25616762 | 5 | 1345650   | CLPTM1L   | - | pan-negative |
| cg04502814 | 5 | 42811952  | SEPP1     | - | pan-negative |
| cg20451680 | 5 | 54281336  | ESM1      | - | pan-negative |
| cg02899723 | 5 | 55033614  | DDX4      | - | pan-negative |
| cg15875314 | 5 | 55035197  | DDX4      | - | pan-negative |
| cg21950518 | 5 | 55290746  | IL6ST     | - | pan-negative |
| cg12491659 | 5 | 57786356  | GAPT      | - | pan-negative |
| cg12663253 | 5 | 67522532  | PIK3R1    | - | pan-negative |
| cg04527989 | 5 | 71614752  | MRPS27    | - | pan-negative |
| cg20277250 | 5 | 74061999  | NSA2      | - | pan-negative |
| cg02387679 | 5 | 75699865  | IQGAP2    | - | pan-negative |
| cg21842274 | 5 | 76248637  | CRHBP     | - | pan-negative |
| cg10180697 | 5 | 79948941  | DHFR      | - | pan-negative |
| cg08244028 | 5 | 79949339  | MSH3      | - | pan-negative |
| cg10978355 | 5 | 80529340  | CKMT2     | - | pan-negative |
| cg07948472 | 5 | 95018471  | SPATA9    | - | pan-negative |
| cg03852144 | 5 | 95159639  | GLRX      | - | pan-negative |
| cg05001145 | 5 | 95297731  | ELL2      | - | pan-negative |
| cg11769360 | 5 | 96215016  | ERAP2     | - | pan-negative |
| cg05869964 | 5 | 111095756 | NREP      | - | pan-negative |
| cg23917399 | 5 | 118691751 | TNFAIP8   | - | pan-negative |
| cg25584626 | 5 | 119800234 | PRR16     | - | pan-negative |
| cg11960393 | 5 | 121414172 | LOX       | - | pan-negative |
| cg17983064 | 5 | 131396357 | IL3       | - | pan-negative |
| cg16609957 | 5 | 132161867 | SHROOM1   | - | pan-negative |
| cg17446142 | 5 | 132201483 | UQCRCQ    | - | pan-negative |
| cg13326338 | 5 | 138463619 | SIL1      | - | pan-negative |
| cg17416146 | 5 | 139927242 | EIF4EBP3  | - | pan-negative |
| cg03513163 | 5 | 140431149 | PCDHB1    | - | pan-negative |
| cg19311812 | 5 | 140700259 | TAF7      | - | pan-negative |
| cg19954000 | 5 | 142065671 | FGF1      | - | pan-negative |
| cg17342759 | 5 | 146461855 | PPP2R2B   | - | pan-negative |
| cg26851800 | 5 | 147548826 | SPINK14   | - | pan-negative |
| cg19404190 | 5 | 147692173 | SPINK7    | - | pan-negative |
| cg18915143 | 5 | 149323959 | PDE6A     | - | pan-negative |
| cg24216701 | 5 | 149545928 | CDX1      | - | pan-negative |
| cg10345936 | 5 | 150727812 | SLC36A2   | - | pan-negative |
| cg14319409 | 5 | 151304409 | GLRA1     | - | pan-negative |
| cg11503011 | 5 | 158526729 | EBF1      | - | pan-negative |
| cg10534672 | 5 | 159797275 | C1QTNF2   | - | pan-negative |
| cg07816439 | 5 | 159797845 | C1QTNF2   | - | pan-negative |
| cg18219951 | 5 | 161494810 | GABRG2    | - | pan-negative |
| cg19905251 | 5 | 168728495 | SLIT3     | - | pan-negative |
| cg26796283 | 5 | 174151334 | MSX2      | - | pan-negative |
| cg14345676 | 5 | 175109098 | HRH2      | - | pan-negative |
| cg01278291 | 5 | 176937363 | DOK3      | - | pan-negative |
| cg04099420 | 6 | 3076354   | RIPK1     | - | pan-negative |
| cg02966851 | 6 | 5260200   | LYRM4     | - | pan-negative |
| cg03447931 | 6 | 7726645   | BMP6      | - | pan-negative |
| cg22572779 | 6 | 10434761  | LINC00518 | - | pan-negative |
| cg09258965 | 6 | 13329625  | TBC1D7    | - | pan-negative |
| cg04603184 | 6 | 13924929  | RNF182    | - | pan-negative |
| cg18719571 | 6 | 15664231  | DTNBP1    | - | pan-negative |
| cg01307730 | 6 | 25726597  | HIST1H2AA | - | pan-negative |
| cg22101098 | 6 | 25830789  | SLC17A1   | - | pan-negative |
| cg05948654 | 6 | 25930507  | SLC17A2   | - | pan-negative |
| cg05554718 | 6 | 26235699  | HIST1H1D  | - | pan-negative |
| cg07671208 | 6 | 26457220  | BTN2A1    | - | pan-negative |
| cg12351042 | 6 | 27879749  | OR2B2     | - | pan-negative |
| cg03340878 | 6 | 27925166  | OR2B6     | - | pan-negative |
| cg25133685 | 6 | 29013336  | OR2W1     | - | pan-negative |
| cg14258236 | 6 | 29323330  | OR5V1     | - | pan-negative |
| cg24076830 | 6 | 29325133  | OR5V1     | - | pan-negative |
| cg15320474 | 6 | 29528005  | UBD       | - | pan-negative |
| cg13118748 | 6 | 30614722  | C6orf136  | - | pan-negative |
| cg04645843 | 6 | 30918653  | DPCR1     | - | pan-negative |
| cg27388462 | 6 | 31138133  | POU5F1    | - | pan-negative |
| cg14324675 | 6 | 31554848  | LST1      | - | pan-negative |
| cg14437986 | 6 | 31691035  | C6orf25   | - | pan-negative |
| cg23538064 | 6 | 31913275  | CFB       | - | pan-negative |
| cg22173227 | 6 | 31948523  | C4A       | - | pan-negative |
| cg13823701 | 6 | 32078411  | TNXB      | - | pan-negative |
| cg17407908 | 6 | 32153115  | AGER      | - | pan-negative |
| cg03465320 | 6 | 32823078  | PSMB9     | - | pan-negative |
| cg16853860 | 6 | 32823116  | PSMB9     | - | pan-negative |
| cg07433344 | 6 | 33172450  | HSD17B8   | - | pan-negative |

|            |   |           |                     |   |              |
|------------|---|-----------|---------------------|---|--------------|
| cg16052901 | 6 | 33240864  | <i>RPS18</i>        | - | pan-negative |
| cg08332212 | 6 | 33770850  | <i>MLN</i>          | - | pan-negative |
| cg03020951 | 6 | 34203887  | <i>HMGA1</i>        | - | pan-negative |
| cg01108476 | 6 | 35109383  | <i>TCP11</i>        | - | pan-negative |
| cg00020533 | 6 | 35480916  | <i>TULP1</i>        | - | pan-negative |
| cg21626086 | 6 | 35704928  | <i>ARMC12</i>       | - | pan-negative |
| cg23670203 | 6 | 36515856  | <i>STK38</i>        | - | pan-negative |
| cg00226923 | 6 | 36972027  | <i>FGD2</i>         | - | pan-negative |
| cg15512851 | 6 | 36973518  | <i>FGD2</i>         | - | pan-negative |
| cg02611419 | 6 | 39282532  | <i>KCNK17</i>       | - | pan-negative |
| cg26928682 | 6 | 41168801  | <i>TREML2</i>       | - | pan-negative |
| cg19005210 | 6 | 41168960  | <i>TREML2</i>       | - | pan-negative |
| cg06196379 | 6 | 41254885  | <i>TREM1</i>        | - | pan-negative |
| cg07131544 | 6 | 41303030  | <i>NCR2</i>         | - | pan-negative |
| cg17391877 | 6 | 41714182  | <i>PGC</i>          | - | pan-negative |
| cg20790540 | 6 | 42884350  | <i>PTCRA</i>        | - | pan-negative |
| cg04201526 | 6 | 49833706  | <i>CRISP1</i>       | - | pan-negative |
| cg12400041 | 6 | 56709328  | <i>DST</i>          | - | pan-negative |
| cg02217159 | 6 | 62996697  | <i>KHDRBS2</i>      | - | pan-negative |
| cg21789545 | 6 | 71012391  | <i>COL9A1</i>       | - | pan-negative |
| cg27472295 | 6 | 83073619  | <i>TPBG</i>         | - | pan-negative |
| cg11990309 | 6 | 87647644  | <i>HTR1E</i>        | - | pan-negative |
| cg23588759 | 6 | 88039288  | <i>GJB7</i>         | - | pan-negative |
| cg16124337 | 6 | 90062879  | <i>UBE2J1</i>       | - | pan-negative |
| cg25217765 | 6 | 90604299  | <i>GJA10</i>        | - | pan-negative |
| cg10869069 | 6 | 101329502 | <i>ASCC3</i>        | - | pan-negative |
| cg24914244 | 6 | 107078674 | <i>QRSL1</i>        | - | pan-negative |
| cg16075940 | 6 | 109557698 | <i>LOC100996634</i> | - | pan-negative |
| cg12800028 | 6 | 110300146 | <i>GPR6</i>         | - | pan-negative |
| cg26155617 | 6 | 110737501 | <i>DDO</i>          | - | pan-negative |
| cg23741330 | 6 | 116832940 | <i>FAM26E</i>       | - | pan-negative |
| cg26205432 | 6 | 118869571 | <i>PLN</i>          | - | pan-negative |
| cg22401066 | 6 | 123110741 | <i>SMPDL3A</i>      | - | pan-negative |
| cg13703941 | 6 | 131465644 | <i>AKAP7</i>        | - | pan-negative |
| cg00852964 | 6 | 133035150 | <i>VNN1</i>         | - | pan-negative |
| cg02184413 | 6 | 133035235 | <i>VNN1</i>         | - | pan-negative |
| cg22825487 | 6 | 133055183 | <i>VNN3</i>         | - | pan-negative |
| cg03944089 | 6 | 134497379 | <i>SGK1</i>         | - | pan-negative |
| cg25629118 | 6 | 146113270 | <i>LOC100507557</i> | - | pan-negative |
| cg18987220 | 6 | 146864247 | <i>RAB32</i>        | - | pan-negative |
| cg19963522 | 6 | 154677796 | <i>IPCEF1</i>       | - | pan-negative |
| cg19690214 | 6 | 154678326 | <i>IPCEF1</i>       | - | pan-negative |
| cg15824056 | 6 | 158402261 | <i>SYNJ2</i>        | - | pan-negative |
| cg05089968 | 6 | 166722773 | <i>PRR18</i>        | - | pan-negative |
| cg13615963 | 6 | 167536521 | <i>CCR6</i>         | - | pan-negative |
| cg12588299 | 6 | 167571803 | <i>GPR31</i>        | - | pan-negative |
| cg09682183 | 6 | 167705253 | <i>UNC93A</i>       | - | pan-negative |
| cg00350478 | 6 | 168480013 | <i>FRMD1</i>        | - | pan-negative |
| cg18651821 | 6 | 170894141 | <i>PDCD2</i>        | - | pan-negative |
| cg26608667 | 7 | 1196370   | <i>ZFAND2A</i>      | - | pan-negative |
| cg18321354 | 7 | 3084516   | <i>CARD11</i>       | - | pan-negative |
| cg21643191 | 7 | 20685988  | <i>ABCB5</i>        | - | pan-negative |
| cg08296824 | 7 | 25019901  | <i>OSBPL3</i>       | - | pan-negative |
| cg25426743 | 7 | 27166103  | <i>HOXA3</i>        | - | pan-negative |
| cg21472642 | 7 | 29233468  | <i>CHN2</i>         | - | pan-negative |
| cg05058973 | 7 | 31002599  | <i>GHRHR</i>        | - | pan-negative |
| cg26312920 | 7 | 31380390  | <i>NEUROD6</i>      | - | pan-negative |
| cg11554507 | 7 | 31380572  | <i>NEUROD6</i>      | - | pan-negative |
| cg12099032 | 7 | 37888745  | <i>NME8</i>         | - | pan-negative |
| cg21341271 | 7 | 39605683  | <i>YAE1D1</i>       | - | pan-negative |
| cg14450506 | 7 | 44614519  | <i>DDX56</i>        | - | pan-negative |
| cg24183958 | 7 | 50860173  | <i>GRB10</i>        | - | pan-negative |
| cg03860890 | 7 | 55086288  | <i>EGFR</i>         | - | pan-negative |
| cg16989248 | 7 | 56117955  | <i>PSPH</i>         | - | pan-negative |
| cg24478387 | 7 | 56131848  | <i>SUMF2</i>        | - | pan-negative |
| cg05724065 | 7 | 56160528  | <i>PHKG1</i>        | - | pan-negative |
| cg02537023 | 7 | 74588054  | <i>NCF1C</i>        | - | pan-negative |
| cg09434995 | 7 | 76040387  | <i>SRCRB4D</i>      | - | pan-negative |
| cg18508525 | 7 | 80230062  | <i>CD36</i>         | - | pan-negative |
| cg05279864 | 7 | 87109319  | <i>0</i>            | - | pan-negative |
| cg16219122 | 7 | 87343956  | <i>ABCB1</i>        | - | pan-negative |
| cg02399455 | 7 | 87855714  | <i>SRI</i>          | - | pan-negative |
| cg18320336 | 7 | 89783848  | <i>STEAP1</i>       | - | pan-negative |
| cg22647507 | 7 | 94293635  | <i>PEG10</i>        | - | pan-negative |
| cg06943865 | 7 | 94293780  | <i>PEG10</i>        | - | pan-negative |
| cg14260458 | 7 | 97620123  | <i>OCM2</i>         | - | pan-negative |
| cg19465374 | 7 | 99573278  | <i>AZGP1</i>        | - | pan-negative |
| cg08626653 | 7 | 100082322 | <i>NYAP1</i>        | - | pan-negative |
| cg12792367 | 7 | 100238750 | <i>TFR2</i>         | - | pan-negative |
| cg14088161 | 7 | 100255043 | <i>ACTL6B</i>       | - | pan-negative |
| cg00644033 | 7 | 100544704 | <i>0</i>            | - | pan-negative |
| cg03751414 | 7 | 100797809 | <i>AP1S1</i>        | - | pan-negative |
| cg04473302 | 7 | 107301217 | <i>SLC26A4</i>      | - | pan-negative |
| cg20891917 | 7 | 112064031 | <i>IFRD1</i>        | - | pan-negative |
| cg11161873 | 7 | 112120943 | <i>LSMEM1</i>       | - | pan-negative |
| cg04663487 | 7 | 115670804 | <i>TFEC</i>         | - | pan-negative |
| cg24621354 | 7 | 115850382 | <i>TES</i>          | - | pan-negative |
| cg16540704 | 7 | 117067416 | <i>ASZ1</i>         | - | pan-negative |
| cg06667406 | 7 | 121773889 | <i>AASS</i>         | - | pan-negative |
| cg22024657 | 7 | 122839955 | <i>SLC13A1</i>      | - | pan-negative |
| cg22213042 | 7 | 129906627 | <i>CPA2</i>         | - | pan-negative |
| cg11063110 | 7 | 129985205 | <i>CPA5</i>         | - | pan-negative |
| cg11058932 | 7 | 130372167 | <i>TSGA13</i>       | - | pan-negative |
| cg20647137 | 7 | 137761289 | <i>AKR1D1</i>       | - | pan-negative |
| cg17784922 | 7 | 142659425 | <i>KEL</i>          | - | pan-negative |

|            |   |           |            |   |              |
|------------|---|-----------|------------|---|--------------|
| cg15542496 | 7 | 142828356 | PIP        | - | pan-negative |
| cg02376703 | 7 | 143106130 | EPHA1      | - | pan-negative |
| cg16722118 | 7 | 143599982 | FAM115A    | - | pan-negative |
| cg11091262 | 7 | 151653454 | GALNTL5    | - | pan-negative |
| cg18452600 | 8 | 9911543   | MSRA       | - | pan-negative |
| cg19172575 | 8 | 11567721  | GATA4      | - | pan-negative |
| cg05226008 | 8 | 13372132  | DLC1       | - | pan-negative |
| cg14605021 | 8 | 16859754  | FGF20      | - | pan-negative |
| cg03919781 | 8 | 16884225  | MICU3      | - | pan-negative |
| cg08385610 | 8 | 20112683  | LZTS1      | - | pan-negative |
| cg03732056 | 8 | 21771059  | DOK2       | - | pan-negative |
| cg23659398 | 8 | 22298060  | PPP3CC     | - | pan-negative |
| cg24430616 | 8 | 23320416  | 0          | - | pan-negative |
| cg14143055 | 8 | 24240597  | ADAMDEC1   | - | pan-negative |
| cg01638025 | 8 | 25041768  | DOCK5      | - | pan-negative |
| cg02130905 | 8 | 27116213  | STMN4      | - | pan-negative |
| cg04953015 | 8 | 27338236  | CHRNA2     | - | pan-negative |
| cg26847866 | 8 | 27492077  | SCARA3     | - | pan-negative |
| cg24698622 | 8 | 30670597  | PPP2CB     | - | pan-negative |
| cg04553559 | 8 | 37552657  | ZNF703     | - | pan-negative |
| cg13612524 | 8 | 37593879  | ERLIN2     | - | pan-negative |
| cg19149125 | 8 | 37619350  | PROSC      | - | pan-negative |
| cg07906724 | 8 | 42623946  | CHRNA6     | - | pan-negative |
| cg23109897 | 8 | 48871883  | PRKDC      | - | pan-negative |
| cg02982690 | 8 | 65492846  | BHLHE22    | - | pan-negative |
| cg13064571 | 8 | 67587053  | C8orf44    | - | pan-negative |
| cg19250907 | 8 | 68659328  | CPA6       | - | pan-negative |
| cg17747005 | 8 | 68864324  | PREX2      | - | pan-negative |
| cg10371914 | 8 | 69350061  | C8orf34    | - | pan-negative |
| cg04845579 | 8 | 70378673  | SULF1      | - | pan-negative |
| cg05624932 | 8 | 75897310  | CRISPLD1   | - | pan-negative |
| cg09935228 | 8 | 81557650  | ZNF704     | - | pan-negative |
| cg19280776 | 8 | 82024586  | PAG1       | - | pan-negative |
| cg21649520 | 8 | 82359799  | PMP2       | - | pan-negative |
| cg10062803 | 8 | 82396644  | FABP4      | - | pan-negative |
| cg18503260 | 8 | 86157410  | CA13       | - | pan-negative |
| cg16852892 | 8 | 89339473  | MMP16      | - | pan-negative |
| cg14538332 | 8 | 97506180  | SDC2       | - | pan-negative |
| cg17769158 | 8 | 103563327 | ODF1       | - | pan-negative |
| cg26952662 | 8 | 104383499 | CTHRC1     | - | pan-negative |
| cg19188612 | 8 | 104384291 | CTHRC1     | - | pan-negative |
| cg15042080 | 8 | 109799756 | TMEM74     | - | pan-negative |
| cg12991341 | 8 | 109800287 | TMEM74     | - | pan-negative |
| cg23338195 | 8 | 118146418 | SLC30A8    | - | pan-negative |
| cg07459489 | 8 | 118147163 | SLC30A8    | - | pan-negative |
| cg06193397 | 8 | 120651069 | ENPP2      | - | pan-negative |
| cg02794695 | 8 | 134072611 | SLA        | - | pan-negative |
| cg22637941 | 8 | 134203841 | WISP1      | - | pan-negative |
| cg24981018 | 8 | 143695376 | ARC        | - | pan-negative |
| cg04311964 | 8 | 143833942 | LYPD2      | - | pan-negative |
| cg24046110 | 8 | 143859143 | LYNX1      | - | pan-negative |
| cg15537850 | 8 | 144661051 | NAPRT1     | - | pan-negative |
| cg19855618 | 8 | 144731579 | ZNF623     | - | pan-negative |
| cg22563697 | 8 | 145722190 | PPP1R16A   | - | pan-negative |
| cg15983520 | 8 | 145729106 | GPT        | - | pan-negative |
| cg21226234 | 8 | 145741991 | RECQL4     | - | pan-negative |
| cg11530960 | 9 | 1052239   | DMRT2      | - | pan-negative |
| cg21331335 | 9 | 2717325   | KCNV2      | - | pan-negative |
| cg14613546 | 9 | 16729103  | BNC2       | - | pan-negative |
| cg18043195 | 9 | 19033231  | FAM154A    | - | pan-negative |
| cg01549015 | 9 | 21206380  | IFNA10     | - | pan-negative |
| cg25106814 | 9 | 26892479  | CAAP1      | - | pan-negative |
| cg23655719 | 9 | 34692578  | CCL19      | - | pan-negative |
| cg07269146 | 9 | 34710657  | CCL21      | - | pan-negative |
| cg02096633 | 9 | 35162499  | UNC13B     | - | pan-negative |
| cg04660234 | 9 | 37800484  | DCAF10     | - | pan-negative |
| cg07315298 | 9 | 70430360  | FOXD4L4    | - | pan-negative |
| cg06190053 | 9 | 70972125  | PGM5       | - | pan-negative |
| cg16509045 | 9 | 77502963  | TRPM6      | - | pan-negative |
| cg18999668 | 9 | 86983400  | SLC28A3    | - | pan-negative |
| cg25141720 | 9 | 89561826  | GAS1       | - | pan-negative |
| cg14350002 | 9 | 89562473  | GAS1       | - | pan-negative |
| cg03149130 | 9 | 93404977  | DIRAS2     | - | pan-negative |
| cg15264273 | 9 | 97040460  | ZNF169     | - | pan-negative |
| cg10900550 | 9 | 100173984 | TDRD7      | - | pan-negative |
| cg25494064 | 9 | 100286340 | TMOD1      | - | pan-negative |
| cg27592318 | 9 | 100707064 | HEMGN      | - | pan-negative |
| cg00755709 | 9 | 104147631 | BAA1       | - | pan-negative |
| cg11953824 | 9 | 111697545 | FAM206A    | - | pan-negative |
| cg06643227 | 9 | 114557239 | 0          | - | pan-negative |
| cg13314167 | 9 | 114557553 | 0          | - | pan-negative |
| cg03454353 | 9 | 115819364 | ZFP37      | - | pan-negative |
| cg02838492 | 9 | 116861288 | KIF12      | - | pan-negative |
| cg17465304 | 9 | 116861442 | KIF12      | - | pan-negative |
| cg27631256 | 9 | 117692745 | TNFSF8     | - | pan-negative |
| cg26981881 | 9 | 117903424 | 42705      | - | pan-negative |
| cg04761824 | 9 | 117905075 | 42705      | - | pan-negative |
| cg00995152 | 9 | 124496315 | DAB2IP     | - | pan-negative |
| cg01536400 | 9 | 124923283 | MORN5      | - | pan-negative |
| cg24046474 | 9 | 130212550 | RPL12      | - | pan-negative |
| cg25732252 | 9 | 130679915 | ST6GALNAC4 | - | pan-negative |
| cg17683775 | 9 | 132515809 | PTGES      | - | pan-negative |
| cg05251000 | 9 | 132935664 | NCS1       | - | pan-negative |
| cg12998491 | 9 | 134152531 | FAM78A     | - | pan-negative |
| cg03251857 | 9 | 134164580 | PPAPDC3    | - | pan-negative |

|            |    |           |          |   |              |
|------------|----|-----------|----------|---|--------------|
| cg03693099 | 9  | 135936901 | CEL      | - | pan-negative |
| cg08539093 | 9  | 136084560 | OBP2B    | - | pan-negative |
| cg15003434 | 9  | 136202985 | SURF6    | - | pan-negative |
| cg01605984 | 9  | 136216154 | SNORD24  | - | pan-negative |
| cg12118437 | 9  | 136283820 | REXO4    | - | pan-negative |
| cg19123107 | 9  | 136324577 | CACFD1   | - | pan-negative |
| cg11884243 | 9  | 137772886 | FCN2     | - | pan-negative |
| cg15092802 | 9  | 138438052 | OBP2A    | - | pan-negative |
| cg05037688 | 9  | 139556554 | EGFL7    | - | pan-negative |
| cg15720535 | 9  | 139582585 | AGPAT2   | - | pan-negative |
| cg09305224 | 9  | 139927245 | FUT7     | - | pan-negative |
| cg27291231 | 9  | 140081916 | SSNA1    | - | pan-negative |
| cg00025991 | 10 | 736625    | DIP2C    | - | pan-negative |
| cg19955521 | 10 | 1102667   | WDR37    | - | pan-negative |
| cg07639198 | 10 | 5004250   | AKR1C1   | - | pan-negative |
| cg09272256 | 10 | 5238881   | AKR1C4   | - | pan-negative |
| cg26105232 | 10 | 6105656   | IL2RA    | - | pan-negative |
| cg11638200 | 10 | 6621965   | PRKCQ    | - | pan-negative |
| cg11115427 | 10 | 13342610  | PHYH     | - | pan-negative |
| cg12874092 | 10 | 17271519  | VIM      | - | pan-negative |
| cg26368842 | 10 | 23004020  | PIP4K2A  | - | pan-negative |
| cg13181019 | 10 | 28571582  | MPP7     | - | pan-negative |
| cg18472228 | 10 | 28966822  | BAMBI    | - | pan-negative |
| cg24698533 | 10 | 30918625  | LYZL2    | - | pan-negative |
| cg14912034 | 10 | 30918851  | LYZL2    | - | pan-negative |
| cg18292711 | 10 | 32346148  | KIF5B    | - | pan-negative |
| cg23218877 | 10 | 35536010  | CCNY     | - | pan-negative |
| cg23900225 | 10 | 35894222  | GJD4     | - | pan-negative |
| cg00168942 | 10 | 35894430  | GJD4     | - | pan-negative |
| cg18493238 | 10 | 37414261  | ANKRD30A | - | pan-negative |
| cg19219503 | 10 | 37414802  | ANKRD30A | - | pan-negative |
| cg05454446 | 10 | 43277757  | BMS1     | - | pan-negative |
| cg16174071 | 10 | 47746195  | ANXA8L1  | - | pan-negative |
| cg06206628 | 10 | 49482826  | FRMPD2   | - | pan-negative |
| cg19612574 | 10 | 49608952  | MAPK8    | - | pan-negative |
| cg03817621 | 10 | 52645399  | A1CF     | - | pan-negative |
| cg24443367 | 10 | 61496187  | 0        | - | pan-negative |
| cg06043042 | 10 | 71333202  | NEUROG3  | - | pan-negative |
| cg13129046 | 10 | 71389696  | C10orf35 | - | pan-negative |
| cg16193203 | 10 | 75313138  | USP54    | - | pan-negative |
| cg21194776 | 10 | 75314128  | USP54    | - | pan-negative |
| cg04688368 | 10 | 79397346  | KCNMA1   | - | pan-negative |
| cg09354331 | 10 | 80961382  | ZMIZ1    | - | pan-negative |
| cg17470697 | 10 | 81205925  | ZCCHC24  | - | pan-negative |
| cg14558138 | 10 | 92680510  | ANKRD1   | - | pan-negative |
| cg09480837 | 10 | 95789501  | PLCE1    | - | pan-negative |
| cg23439277 | 10 | 95790874  | PLCE1    | - | pan-negative |
| cg07489134 | 10 | 96305958  | HELLS    | - | pan-negative |
| cg13471990 | 10 | 97515222  | ENTPD1   | - | pan-negative |
| cg04590978 | 10 | 97802941  | CCNJ     | - | pan-negative |
| cg02238747 | 10 | 99161279  | RRP12    | - | pan-negative |
| cg09448875 | 10 | 101542449 | ABCC2    | - | pan-negative |
| cg17044311 | 10 | 101542983 | ABCC2    | - | pan-negative |
| cg26610808 | 10 | 102046685 | BLOC1S2  | - | pan-negative |
| cg18834029 | 10 | 103349097 | DPCD     | - | pan-negative |
| cg24934431 | 10 | 104597864 | CYP17A1  | - | pan-negative |
| cg03640944 | 10 | 106093819 | ITPRIP   | - | pan-negative |
| cg04712892 | 10 | 115424103 | NRAP     | - | pan-negative |
| cg04281204 | 10 | 115612802 | DCLRE1A  | - | pan-negative |
| cg23274030 | 10 | 120925632 | SFXN4    | - | pan-negative |
| cg04058169 | 10 | 124913438 | BUB3     | - | pan-negative |
| cg07504718 | 10 | 127465376 | MMP21    | - | pan-negative |
| cg27056559 | 10 | 131348484 | MGMT     | - | pan-negative |
| cg10333959 | 10 | 131354940 | MGMT     | - | pan-negative |
| cg19680672 | 10 | 131412579 | MGMT     | - | pan-negative |
| cg21607649 | 10 | 134884177 | 0        | - | pan-negative |
| cg12251804 | 10 | 135171083 | FUOM     | - | pan-negative |
| cg13315147 | 10 | 135341528 | CYP2E1   | - | pan-negative |
| cg22963452 | 11 | 312766    | IFITM1   | - | pan-negative |
| cg26488636 | 11 | 746801    | TALDO1   | - | pan-negative |
| cg17627559 | 11 | 2323896   | TSPAN32  | - | pan-negative |
| cg17575811 | 11 | 2466409   | KCNQ1    | - | pan-negative |
| cg17229197 | 11 | 2542688   | KCNQ1    | - | pan-negative |
| cg12949760 | 11 | 2542862   | KCNQ1    | - | pan-negative |
| cg19923326 | 11 | 2828778   | KCNQ1    | - | pan-negative |
| cg21019522 | 11 | 2920789   | SLC22A18 | - | pan-negative |
| cg21407055 | 11 | 3666483   | ART1     | - | pan-negative |
| cg26158980 | 11 | 3692187   | CHRNA10  | - | pan-negative |
| cg13162577 | 11 | 6226437   | C11orf42 | - | pan-negative |
| cg18103150 | 11 | 6518907   | DNHD1    | - | pan-negative |
| cg25787984 | 11 | 12031508  | DKK3     | - | pan-negative |
| cg22967016 | 11 | 12131739  | MICAL2   | - | pan-negative |
| cg12422683 | 11 | 12132611  | MICAL2   | - | pan-negative |
| cg19662708 | 11 | 12785573  | TEAD1    | - | pan-negative |
| cg22586527 | 11 | 16499411  | SOX6     | - | pan-negative |
| cg06763078 | 11 | 17756761  | KCNC1    | - | pan-negative |
| cg16935075 | 11 | 18062359  | TPH1     | - | pan-negative |
| cg20833786 | 11 | 18141393  | MRGPRX3  | - | pan-negative |
| cg13062935 | 11 | 19082514  | MRGPRX2  | - | pan-negative |
| cg19216731 | 11 | 19223635  | CSRP3    | - | pan-negative |
| cg14704941 | 11 | 19224659  | CSRP3    | - | pan-negative |
| cg06185738 | 11 | 22359868  | SLC17A6  | - | pan-negative |
| cg20092728 | 11 | 26744467  | SLC5A12  | - | pan-negative |
| cg11822932 | 11 | 33913716  | LMO2     | - | pan-negative |
| cg09358725 | 11 | 33914088  | LMO2     | - | pan-negative |

|            |    |           |              |   |              |
|------------|----|-----------|--------------|---|--------------|
| cg17838765 | 11 | 43902310  | ALKBH3       | - | pan-negative |
| cg06791867 | 11 | 44880944  | TSPAN18      | - | pan-negative |
| cg20227165 | 11 | 45115819  | PRDM11       | - | pan-negative |
| cg20199333 | 11 | 46740790  | F2           | - | pan-negative |
| cg10335931 | 11 | 47374575  | MYBPC3       | - | pan-negative |
| cg01888601 | 11 | 47736182  | AGBL2        | - | pan-negative |
| cg21939221 | 11 | 47737371  | AGBL2        | - | pan-negative |
| cg06980460 | 11 | 49230548  | FOLH1        | - | pan-negative |
| cg07330329 | 11 | 55028768  | TRIM48       | - | pan-negative |
| cg12603560 | 11 | 57090070  | TNKS1BP1     | - | pan-negative |
| cg24329717 | 11 | 57106093  | P2RX3        | - | pan-negative |
| cg15357945 | 11 | 57158361  | PRG2         | - | pan-negative |
| cg20654468 | 11 | 58342997  | LPXN         | - | pan-negative |
| cg23641267 | 11 | 58343791  | LPXN         | - | pan-negative |
| cg03634982 | 11 | 60047979  | MS4A4A       | - | pan-negative |
| cg13633026 | 11 | 60466573  | MS4A8        | - | pan-negative |
| cg10735607 | 11 | 60680515  | TMEM109      | - | pan-negative |
| cg21992250 | 11 | 60718709  | SLC15A3      | - | pan-negative |
| cg07380416 | 11 | 60739172  | CD6          | - | pan-negative |
| cg09902130 | 11 | 60739178  | CD6          | - | pan-negative |
| cg18432384 | 11 | 61248084  | PPP1R32      | - | pan-negative |
| cg02104644 | 11 | 61347820  | SYT7         | - | pan-negative |
| cg03805684 | 11 | 61561219  | FEN1         | - | pan-negative |
| cg12428447 | 11 | 62753072  | SLC22A6      | - | pan-negative |
| cg25599242 | 11 | 63304337  | RARRES3      | - | pan-negative |
| cg03510310 | 11 | 63331286  | HRASLS2      | - | pan-negative |
| cg09326702 | 11 | 64323448  | SLC22A11     | - | pan-negative |
| cg17993949 | 11 | 64357910  | SLC22A12     | - | pan-negative |
| cg26884581 | 11 | 64527414  | PYGM         | - | pan-negative |
| cg04898797 | 11 | 64570331  | MAP4K2       | - | pan-negative |
| cg14430111 | 11 | 64879374  | TM7SF2       | - | pan-negative |
| cg14391855 | 11 | 66104174  | RIN1         | - | pan-negative |
| cg27278802 | 11 | 66359430  | CCDC87       | - | pan-negative |
| cg04985144 | 11 | 66488638  | SPTBN2       | - | pan-negative |
| cg09190408 | 11 | 67170610  | TBC1D10C     | - | pan-negative |
| cg11600161 | 11 | 67171585  | TBC1D10C     | - | pan-negative |
| cg20792833 | 11 | 67205195  | PTPRCAP      | - | pan-negative |
| cg21518947 | 11 | 67222648  | CABP4        | - | pan-negative |
| cg09038676 | 11 | 67351608  | GSTP1        | - | pan-negative |
| cg15322932 | 11 | 67777682  | ALDH3B1      | - | pan-negative |
| cg26149678 | 11 | 71709917  | IL18BP       | - | pan-negative |
| cg18769818 | 11 | 72433059  | ARAP1        | - | pan-negative |
| cg00211661 | 11 | 72433619  | ARAP1        | - | pan-negative |
| cg07091552 | 11 | 73721170  | UCP3         | - | pan-negative |
| cg27596068 | 11 | 75272301  | SERPINH1     | - | pan-negative |
| cg20641660 | 11 | 76155487  | C11orf30     | - | pan-negative |
| cg16986720 | 11 | 84634735  | DLG2         | - | pan-negative |
| cg15822411 | 11 | 85566560  | CCDC83       | - | pan-negative |
| cg03417466 | 11 | 88910418  | TYR          | - | pan-negative |
| cg01987509 | 11 | 101002045 | LOC101054525 | - | pan-negative |
| cg14839898 | 11 | 111956362 | TIMM8B       | - | pan-negative |
| cg26661481 | 11 | 117855870 | IL10RA       | - | pan-negative |
| cg01697865 | 11 | 117856007 | IL10RA       | - | pan-negative |
| cg07376232 | 11 | 118084920 | AMICA1       | - | pan-negative |
| cg24612198 | 11 | 118175631 | CD3E         | - | pan-negative |
| cg24841244 | 11 | 118213330 | CD3D         | - | pan-negative |
| cg13625403 | 11 | 120008510 | TRIM29       | - | pan-negative |
| cg19363546 | 11 | 120110701 | POU2F3       | - | pan-negative |
| cg06465194 | 11 | 120531034 | GRIK4        | - | pan-negative |
| cg15737168 | 11 | 120974095 | TECTA        | - | pan-negative |
| cg22512531 | 11 | 122709551 | CRTAM        | - | pan-negative |
| cg08203715 | 11 | 126226154 | ST3GAL4      | - | pan-negative |
| cg11387131 | 11 | 128761211 | KCNJ5        | - | pan-negative |
| cg10089145 | 11 | 130030103 | ST14         | - | pan-negative |
| cg25999867 | 11 | 134145940 | GLB1L3       | - | pan-negative |
| cg14759043 | 12 | 3862597   | EFCAB4B      | - | pan-negative |
| cg25425078 | 12 | 4381777   | CCND2        | - | pan-negative |
| cg02765328 | 12 | 4383281   | CCND2        | - | pan-negative |
| cg08069899 | 12 | 4383770   | CCND2        | - | pan-negative |
| cg13801381 | 12 | 4384022   | CCND2        | - | pan-negative |
| cg12371177 | 12 | 6419148   | PLEKHG6      | - | pan-negative |
| cg25655096 | 12 | 6745292   | LPAR5        | - | pan-negative |
| cg26956535 | 12 | 6880640   | LAG3         | - | pan-negative |
| cg01820374 | 12 | 6882083   | LAG3         | - | pan-negative |
| cg15778232 | 12 | 7081145   | EMG1         | - | pan-negative |
| cg16879115 | 12 | 7819180   | APOBEC1      | - | pan-negative |
| cg09238677 | 12 | 8218922   | C3AR1        | - | pan-negative |
| cg27653134 | 12 | 8975309   | A2ML1        | - | pan-negative |
| cg05590294 | 12 | 9913395   | CD69         | - | pan-negative |
| cg11905488 | 12 | 10123604  | CLEC12A      | - | pan-negative |
| cg26718420 | 12 | 10331666  | TMEM52B      | - | pan-negative |
| cg12424907 | 12 | 11151522  | TAS2R20      | - | pan-negative |
| cg12791554 | 12 | 11151622  | TAS2R20      | - | pan-negative |
| cg00431549 | 12 | 15039025  | MGP          | - | pan-negative |
| cg14738823 | 12 | 15090958  | ERP27        | - | pan-negative |
| cg16218424 | 12 | 22198973  | CMAS         | - | pan-negative |
| cg15758700 | 12 | 25707667  | IFLTD1       | - | pan-negative |
| cg01986577 | 12 | 27485373  | ARNTL2       | - | pan-negative |
| cg21369988 | 12 | 30907191  | CAPRIN2      | - | pan-negative |
| cg22560190 | 12 | 41086198  | CNTN1        | - | pan-negative |
| cg16469386 | 12 | 46662743  | SLC38A1      | - | pan-negative |
| cg18216249 | 12 | 48100805  | RPAP3        | - | pan-negative |
| cg00745543 | 12 | 48722754  | H1FNT        | - | pan-negative |
| cg00601486 | 12 | 48723148  | H1FNT        | - | pan-negative |
| cg12133004 | 12 | 48876160  | C12orf54     | - | pan-negative |

|            |    |           |           |   |              |
|------------|----|-----------|-----------|---|--------------|
| cg21948783 | 12 | 49372474  | WNT1      | - | pan-negative |
| cg24059075 | 12 | 49688316  | PRPH      | - | pan-negative |
| cg25936385 | 12 | 50298731  | FAIM2     | - | pan-negative |
| cg21161070 | 12 | 50419399  | RACGAP1   | - | pan-negative |
| cg10590292 | 12 | 51717674  | BIN2      | - | pan-negative |
| cg21022247 | 12 | 51718310  | BIN2      | - | pan-negative |
| cg19974223 | 12 | 52281676  | ANKRD33   | - | pan-negative |
| cg19948393 | 12 | 52281810  | ANKRD33   | - | pan-negative |
| cg27222589 | 12 | 52968762  | KRT74     | - | pan-negative |
| cg20862119 | 12 | 53171017  | KRT76     | - | pan-negative |
| cg16509569 | 12 | 54891634  | NCKAP1L   | - | pan-negative |
| cg27160701 | 12 | 55248424  | MUCL1     | - | pan-negative |
| cg21922731 | 12 | 57157130  | HSD17B6   | - | pan-negative |
| cg10215079 | 12 | 57410788  | TAC3      | - | pan-negative |
| cg25189085 | 12 | 57644658  | STAC3     | - | pan-negative |
| cg05876918 | 12 | 57985234  | PIP4K2C   | - | pan-negative |
| cg11452221 | 12 | 58004830  | ARHGEF25  | - | pan-negative |
| cg04819539 | 12 | 58167550  | METTL21B  | - | pan-negative |
| cg06317209 | 12 | 58210878  | AVIL      | - | pan-negative |
| cg14108394 | 12 | 62997291  | C12orf61  | - | pan-negative |
| cg11814446 | 12 | 65562996  | LEMD3     | - | pan-negative |
| cg27182761 | 12 | 76426593  | PHLDA1    | - | pan-negative |
| cg13976438 | 12 | 88423076  | C12orf50  | - | pan-negative |
| cg10094277 | 12 | 91451887  | KERA      | - | pan-negative |
| cg22192762 | 12 | 94542778  | PLXNC1    | - | pan-negative |
| cg18392482 | 12 | 96338011  | AMDHD1    | - | pan-negative |
| cg27246571 | 12 | 96389588  | HAL       | - | pan-negative |
| cg18777554 | 12 | 97042657  | 0         | - | pan-negative |
| cg04282622 | 12 | 100040922 | FAM71C    | - | pan-negative |
| cg13338132 | 12 | 100041984 | FAM71C    | - | pan-negative |
| cg03048535 | 12 | 109747100 | FOXP4     | - | pan-negative |
| cg11939071 | 12 | 113494429 | DTX1      | - | pan-negative |
| cg06878726 | 12 | 114404035 | RBM19     | - | pan-negative |
| cg11263296 | 12 | 120428313 | CCDC64    | - | pan-negative |
| cg27349244 | 12 | 122611918 | MLXIP     | - | pan-negative |
| cg27180443 | 12 | 125348871 | SCARB1    | - | pan-negative |
| cg27600136 | 13 | 27844156  | RASL11A   | - | pan-negative |
| cg14424530 | 13 | 30170129  | SLC7A1    | - | pan-negative |
| cg13060997 | 13 | 37006611  | CCNA1     | - | pan-negative |
| cg22088594 | 13 | 37634133  | SUPT20H   | - | pan-negative |
| cg11679069 | 13 | 43596577  | DNAJC15   | - | pan-negative |
| cg00131557 | 13 | 43596656  | DNAJC15   | - | pan-negative |
| cg21817450 | 13 | 44240722  | ENOX1     | - | pan-negative |
| cg20333306 | 13 | 49039678  | RB1       | - | pan-negative |
| cg11765205 | 13 | 50202547  | ARL11     | - | pan-negative |
| cg02407785 | 13 | 67804285  | PCDH9     | - | pan-negative |
| cg20349377 | 13 | 70683127  | KLHL1     | - | pan-negative |
| cg26413827 | 13 | 72441184  | DACH1     | - | pan-negative |
| cg19756611 | 13 | 72441705  | DACH1     | - | pan-negative |
| cg03086857 | 13 | 78492568  | EDNRB     | - | pan-negative |
| cg07710481 | 13 | 88325384  | SLITRK5   | - | pan-negative |
| cg09646392 | 13 | 108921052 | TNFSF13B  | - | pan-negative |
| cg21368354 | 13 | 111267856 | CARKD     | - | pan-negative |
| cg15842430 | 14 | 21237111  | EDDM3B    | - | pan-negative |
| cg06720660 | 14 | 21248497  | RNASE6    | - | pan-negative |
| cg14401454 | 14 | 21497485  | TPPP2     | - | pan-negative |
| cg00935388 | 14 | 21525319  | RNASE8    | - | pan-negative |
| cg03156547 | 14 | 23525003  | CDH24     | - | pan-negative |
| cg15691199 | 14 | 23589419  | CEBPE     | - | pan-negative |
| cg10560038 | 14 | 23844876  | CMTM5     | - | pan-negative |
| cg22082462 | 14 | 24540415  | CPNE6     | - | pan-negative |
| cg06186808 | 14 | 24600901  | FITM1     | - | pan-negative |
| cg15896447 | 14 | 24683287  | CHMP4A    | - | pan-negative |
| cg14587868 | 14 | 24732737  | TGM1      | - | pan-negative |
| cg08020808 | 14 | 24977773  | CMA1      | - | pan-negative |
| cg02150910 | 14 | 25079357  | GZMH      | - | pan-negative |
| cg08766149 | 14 | 25103301  | GZMB      | - | pan-negative |
| cg10128164 | 14 | 31344535  | COCH      | - | pan-negative |
| cg20103550 | 14 | 44976457  | FSCB      | - | pan-negative |
| cg13335112 | 14 | 51339216  | ABHD12B   | - | pan-negative |
| cg22430790 | 14 | 52117833  | FRMD6-AS1 | - | pan-negative |
| cg11715903 | 14 | 53417327  | FERMT2    | - | pan-negative |
| cg16249711 | 14 | 55907501  | TBPL2     | - | pan-negative |
| cg16907514 | 14 | 56046098  | KTN1-AS1  | - | pan-negative |
| cg14847688 | 14 | 59932113  | GPR135    | - | pan-negative |
| cg23504707 | 14 | 60712563  | PPM1A     | - | pan-negative |
| cg20764656 | 14 | 65410479  | GPX2      | - | pan-negative |
| cg14944269 | 14 | 65439602  | RAB15     | - | pan-negative |
| cg12575181 | 14 | 68067658  | PIGH      | - | pan-negative |
| cg23350274 | 14 | 68188663  | RDH12     | - | pan-negative |
| cg04394967 | 14 | 68189457  | RDH12     | - | pan-negative |
| cg07366967 | 14 | 69675438  | EXD2      | - | pan-negative |
| cg14912575 | 14 | 70038236  | CCDC177   | - | pan-negative |
| cg03234661 | 14 | 70265290  | SLC10A1   | - | pan-negative |
| cg08936952 | 14 | 74026160  | HEATR4    | - | pan-negative |
| cg20718816 | 14 | 75078842  | LTBP2     | - | pan-negative |
| cg20385229 | 14 | 78175470  | SLIRP     | - | pan-negative |
| cg16372520 | 14 | 78869751  | NRXN3     | - | pan-negative |
| cg02629761 | 14 | 89020745  | PTPN21    | - | pan-negative |
| cg24023606 | 14 | 90421208  | EFCAB11   | - | pan-negative |
| cg14974772 | 14 | 92414425  | FBLN5     | - | pan-negative |
| cg20895877 | 14 | 94254586  | PRIMA1    | - | pan-negative |
| cg03389164 | 14 | 94423872  | ASB2      | - | pan-negative |
| cg00239071 | 14 | 100789737 | SLC25A47  | - | pan-negative |
| cg14693893 | 14 | 102430593 | DYNC1H1   | - | pan-negative |

|            |    |           |                  |   |              |
|------------|----|-----------|------------------|---|--------------|
| cg08707819 | 14 | 103059391 | <i>RCOR1</i>     | - | pan-negative |
| cg03021690 | 14 | 103591964 | <i>TNFAIP2</i>   | - | pan-negative |
| cg20368904 | 14 | 103593088 | <i>TNFAIP2</i>   | - | pan-negative |
| cg15352829 | 14 | 105391018 | <i>PLD4</i>      | - | pan-negative |
| cg09450238 | 14 | 105715783 | <i>BRF1</i>      | - | pan-negative |
| cg18602919 | 15 | 23931674  | <i>NDN</i>       | - | pan-negative |
| cg12532169 | 15 | 23932370  | <i>NDN</i>       | - | pan-negative |
| cg13828758 | 15 | 23932373  | <i>NDN</i>       | - | pan-negative |
| cg18552939 | 15 | 23932620  | <i>NDN</i>       | - | pan-negative |
| cg11166999 | 15 | 25226929  | <i>SNORD107</i>  | - | pan-negative |
| cg08993557 | 15 | 25231326  | <i>SNORD108</i>  | - | pan-negative |
| cg18499731 | 15 | 25522171  | <i>SNORD109B</i> | - | pan-negative |
| cg12582965 | 15 | 25972328  | <i>ATP10A</i>    | - | pan-negative |
| cg23623692 | 15 | 26003464  | <i>ATP10A</i>    | - | pan-negative |
| cg11015241 | 15 | 26026249  | <i>ATP10A</i>    | - | pan-negative |
| cg26062856 | 15 | 26109425  | <i>ATP10A</i>    | - | pan-negative |
| cg15940569 | 15 | 27019356  | <i>GABRB3</i>    | - | pan-negative |
| cg12044210 | 15 | 29213858  | <i>APBA2</i>     | - | pan-negative |
| cg21917349 | 15 | 29213860  | <i>APBA2</i>     | - | pan-negative |
| cg05924191 | 15 | 35279830  | <i>ZNF770</i>    | - | pan-negative |
| cg21039679 | 15 | 38989738  | <i>C15orf53</i>  | - | pan-negative |
| cg14343107 | 15 | 40453695  | <i>BUB1B</i>     | - | pan-negative |
| cg02240622 | 15 | 40601467  | <i>PLCB2</i>     | - | pan-negative |
| cg13474734 | 15 | 40630791  | <i>C15orf52</i>  | - | pan-negative |
| cg03012280 | 15 | 41098255  | <i>ZFYVE19</i>   | - | pan-negative |
| cg22680812 | 15 | 43512998  | <i>EPB42</i>     | - | pan-negative |
| cg18431127 | 15 | 43513563  | <i>EPB42</i>     | - | pan-negative |
| cg03679734 | 15 | 43885090  | <i>CKMT1B</i>    | - | pan-negative |
| cg00877887 | 15 | 45406654  | <i>DUOXA2</i>    | - | pan-negative |
| cg11540997 | 15 | 45407818  | <i>DUOXA2</i>    | - | pan-negative |
| cg21673646 | 15 | 45479977  | <i>SHF</i>       | - | pan-negative |
| cg01789267 | 15 | 45545111  | <i>SLC28A2</i>   | - | pan-negative |
| cg22340747 | 15 | 45683210  | <i>0</i>         | - | pan-negative |
| cg07888040 | 15 | 51669526  | <i>GLDN</i>      | - | pan-negative |
| cg25003924 | 15 | 52861754  | <i>ARPP19</i>    | - | pan-negative |
| cg23165541 | 15 | 64338164  | <i>DAPK2</i>     | - | pan-negative |
| cg03578041 | 15 | 71147307  | <i>LARP6</i>     | - | pan-negative |
| cg18860847 | 15 | 72103457  | <i>NR2E3</i>     | - | pan-negative |
| cg02883230 | 15 | 72564263  | <i>PARP6</i>     | - | pan-negative |
| cg25996835 | 15 | 72978165  | <i>HIGD2B</i>    | - | pan-negative |
| cg24688248 | 15 | 73976389  | <i>CD276</i>     | - | pan-negative |
| cg11787522 | 15 | 74495109  | <i>STRA6</i>     | - | pan-negative |
| cg19510604 | 15 | 74901076  | <i>CLK3</i>      | - | pan-negative |
| cg00622552 | 15 | 76016335  | <i>ODF3L1</i>    | - | pan-negative |
| cg07061145 | 15 | 78556178  | <i>DNAJA4</i>    | - | pan-negative |
| cg21402071 | 15 | 78933902  | <i>CHRNA4</i>    | - | pan-negative |
| cg14426682 | 15 | 79164100  | <i>MORF4L1</i>   | - | pan-negative |
| cg16154416 | 15 | 79382767  | <i>RASGRF1</i>   | - | pan-negative |
| cg01001286 | 15 | 81475638  | <i>0</i>         | - | pan-negative |
| cg24824266 | 15 | 91643655  | <i>SV2B</i>      | - | pan-negative |
| cg06572974 | 15 | 93442219  | <i>CHD2</i>      | - | pan-negative |
| cg21416022 | 15 | 99789661  | <i>TTC23</i>     | - | pan-negative |
| cg03532957 | 15 | 101792098 | <i>CHSY1</i>     | - | pan-negative |
| cg10084993 | 16 | 2077647   | <i>SLC9A3R2</i>  | - | pan-negative |
| cg22730830 | 16 | 2867434   | <i>PRSS21</i>    | - | pan-negative |
| cg12741488 | 16 | 2933841   | <i>FLYWCH2</i>   | - | pan-negative |
| cg13928306 | 16 | 3162397   | <i>ZNF205</i>    | - | pan-negative |
| cg16454349 | 16 | 4837889   | <i>SMIM22</i>    | - | pan-negative |
| cg09816471 | 16 | 11761860  | <i>SNN</i>       | - | pan-negative |
| cg23830611 | 16 | 14927461  | <i>NOMO1</i>     | - | pan-negative |
| cg18912933 | 16 | 15031749  | <i>NPIA1</i>     | - | pan-negative |
| cg08081725 | 16 | 15743607  | <i>NDE1</i>      | - | pan-negative |
| cg02614818 | 16 | 16318168  | <i>ABCC6</i>     | - | pan-negative |
| cg23444894 | 16 | 19297743  | <i>CLEC19A</i>   | - | pan-negative |
| cg13619990 | 16 | 20703237  | <i>ACSM1</i>     | - | pan-negative |
| cg21745164 | 16 | 23765304  | <i>CHP2</i>      | - | pan-negative |
| cg07327347 | 16 | 25228004  | <i>AQP8</i>      | - | pan-negative |
| cg00931491 | 16 | 28608288  | <i>SULT1A2</i>   | - | pan-negative |
| cg11094938 | 16 | 28888844  | <i>ATP2A1</i>    | - | pan-negative |
| cg26751195 | 16 | 29673680  | <i>SPN</i>       | - | pan-negative |
| cg11432797 | 16 | 29674487  | <i>SPN</i>       | - | pan-negative |
| cg23093496 | 16 | 29757323  | <i>C16orf54</i>  | - | pan-negative |
| cg00334507 | 16 | 29824599  | <i>PRRT2</i>     | - | pan-negative |
| cg17428423 | 16 | 30022132  | <i>DOC2A</i>     | - | pan-negative |
| cg19663795 | 16 | 30393854  | <i>42614</i>     | - | pan-negative |
| cg04404982 | 16 | 30483287  | <i>ITGAL</i>     | - | pan-negative |
| cg13669583 | 16 | 30546630  | <i>ZNF747</i>    | - | pan-negative |
| cg10976172 | 16 | 30597528  | <i>ZNF785</i>    | - | pan-negative |
| cg11884546 | 16 | 31366377  | <i>ITGAX</i>     | - | pan-negative |
| cg10995380 | 16 | 31484032  | <i>TGFB11</i>    | - | pan-negative |
| cg12940073 | 16 | 48180664  | <i>ABCC12</i>    | - | pan-negative |
| cg16834187 | 16 | 50404286  | <i>BRD7</i>      | - | pan-negative |
| cg27431150 | 16 | 50715135  | <i>SNX20</i>     | - | pan-negative |
| cg26954174 | 16 | 50730813  | <i>NOD2</i>      | - | pan-negative |
| cg06094150 | 16 | 56685637  | <i>MT1B</i>      | - | pan-negative |
| cg17386181 | 16 | 56685902  | <i>MT1B</i>      | - | pan-negative |
| cg17759354 | 16 | 56898786  | <i>SLC12A3</i>   | - | pan-negative |
| cg04799664 | 16 | 57053850  | <i>NLRC5</i>     | - | pan-negative |
| cg23713520 | 16 | 57318087  | <i>PLLP</i>      | - | pan-negative |
| cg23471482 | 16 | 57392198  | <i>CCL22</i>     | - | pan-negative |
| cg20427865 | 16 | 57406353  | <i>CX3CL1</i>    | - | pan-negative |
| cg09069593 | 16 | 57576285  | <i>GPR114</i>    | - | pan-negative |
| cg09671611 | 16 | 57577474  | <i>GPR114</i>    | - | pan-negative |
| cg12125117 | 16 | 57701461  | <i>GPR97</i>     | - | pan-negative |
| cg01813965 | 16 | 57729104  | <i>CCDC135</i>   | - | pan-negative |

|            |    |          |                    |   |              |
|------------|----|----------|--------------------|---|--------------|
| cg13500388 | 16 | 67062135 | <i>CBFB</i>        | - | pan-negative |
| cg10574499 | 16 | 67918754 | <i>NRN1L</i>       | - | pan-negative |
| cg20675440 | 16 | 69374895 | <i>COG8</i>        | - | pan-negative |
| cg11147886 | 16 | 69598170 | <i>0</i>           | - | pan-negative |
| cg16863382 | 16 | 75252695 | <i>CTRB1</i>       | - | pan-negative |
| cg23487586 | 16 | 85315923 | <i>LINC00311</i>   | - | pan-negative |
| cg23871933 | 16 | 85722399 | <i>GINS2</i>       | - | pan-negative |
| cg12343082 | 16 | 87970145 | <i>CA5A</i>        | - | pan-negative |
| cg21184011 | 16 | 88636102 | <i>ZC3H18</i>      | - | pan-negative |
| cg04731384 | 16 | 90076766 | <i>DBNDD1</i>      | - | pan-negative |
| cg25430696 | 17 | 2240014  | <i>TSR1</i>        | - | pan-negative |
| cg01138020 | 17 | 4337094  | <i>SPNS3</i>       | - | pan-negative |
| cg18750756 | 17 | 4337231  | <i>SPNS3</i>       | - | pan-negative |
| cg22628873 | 17 | 4464400  | <i>GGT6</i>        | - | pan-negative |
| cg08141989 | 17 | 7082562  | <i>ASGR1</i>       | - | pan-negative |
| cg17663577 | 17 | 7185232  | <i>SLC2A4</i>      | - | pan-negative |
| cg18632631 | 17 | 7284049  | <i>TNK1</i>        | - | pan-negative |
| cg01029592 | 17 | 7493453  | <i>SOX15</i>       | - | pan-negative |
| cg01013324 | 17 | 7608068  | <i>EFNB3</i>       | - | pan-negative |
| cg00501366 | 17 | 7992476  | <i>ALOX12B</i>     | - | pan-negative |
| cg06468695 | 17 | 8647944  | <i>CCDC42</i>      | - | pan-negative |
| cg20261915 | 17 | 9729424  | <i>GLP2R</i>       | - | pan-negative |
| cg24357161 | 17 | 9810114  | <i>RCVRN</i>       | - | pan-negative |
| cg17639046 | 17 | 14204027 | <i>HS3ST3B1</i>    | - | pan-negative |
| cg05011018 | 17 | 15585906 | <i>TRIM16</i>      | - | pan-negative |
| cg03025569 | 17 | 15586426 | <i>TRIM16</i>      | - | pan-negative |
| cg23423382 | 17 | 16472440 | <i>ZNF287</i>      | - | pan-negative |
| cg06990298 | 17 | 17399700 | <i>RASD1</i>       | - | pan-negative |
| cg19539519 | 17 | 26553687 | <i>PYY2</i>        | - | pan-negative |
| cg10671802 | 17 | 27230278 | <i>DHRS13</i>      | - | pan-negative |
| cg07285953 | 17 | 27572551 | <i>CRYBA1</i>      | - | pan-negative |
| cg05379350 | 17 | 27917157 | <i>GIT1</i>        | - | pan-negative |
| cg26829529 | 17 | 31317536 | <i>SPACA3</i>      | - | pan-negative |
| cg02936263 | 17 | 32596886 | <i>CCL7</i>        | - | pan-negative |
| cg17118262 | 17 | 32690569 | <i>CCL1</i>        | - | pan-negative |
| cg12517944 | 17 | 33520939 | <i>SLC35G3</i>     | - | pan-negative |
| cg23743114 | 17 | 34328396 | <i>CCL15-CCL14</i> | - | pan-negative |
| cg00093177 | 17 | 37185495 | <i>LRRC37A11P</i>  | - | pan-negative |
| cg00112517 | 17 | 37783011 | <i>PPP1R1B</i>     | - | pan-negative |
| cg12894984 | 17 | 37823631 | <i>PNMT</i>        | - | pan-negative |
| cg17067993 | 17 | 38721675 | <i>CCR7</i>        | - | pan-negative |
| cg13504059 | 17 | 38721942 | <i>CCR7</i>        | - | pan-negative |
| cg22983092 | 17 | 38911538 | <i>KRT25</i>       | - | pan-negative |
| cg10173723 | 17 | 38940118 | <i>KRT27</i>       | - | pan-negative |
| cg20484002 | 17 | 38956500 | <i>KRT28</i>       | - | pan-negative |
| cg22805632 | 17 | 38978827 | <i>KRT10</i>       | - | pan-negative |
| cg02756698 | 17 | 39023008 | <i>KRT12</i>       | - | pan-negative |
| cg14087150 | 17 | 39316639 | <i>KRTAP4-4</i>    | - | pan-negative |
| cg11710560 | 17 | 39389144 | <i>KRTAP9-3</i>    | - | pan-negative |
| cg26499286 | 17 | 39472498 | <i>KRTAP17-1</i>   | - | pan-negative |
| cg15983005 | 17 | 39506938 | <i>KRT33A</i>      | - | pan-negative |
| cg18370227 | 17 | 39507261 | <i>KRT33A</i>      | - | pan-negative |
| cg14533138 | 17 | 39525921 | <i>KRT33B</i>      | - | pan-negative |
| cg06074920 | 17 | 39539075 | <i>KRT34</i>       | - | pan-negative |
| cg00063144 | 17 | 39554055 | <i>KRT31</i>       | - | pan-negative |
| cg23674788 | 17 | 39623313 | <i>KRT32</i>       | - | pan-negative |
| cg02784874 | 17 | 39728962 | <i>KRT9</i>        | - | pan-negative |
| cg27236973 | 17 | 39781997 | <i>KRT17</i>       | - | pan-negative |
| cg04278905 | 17 | 40273815 | <i>KAT2A</i>       | - | pan-negative |
| cg16777510 | 17 | 40440022 | <i>STAT5A</i>      | - | pan-negative |
| cg15945602 | 17 | 41175317 | <i>VAT1</i>        | - | pan-negative |
| cg22264436 | 17 | 41836423 | <i>SOST</i>        | - | pan-negative |
| cg03580247 | 17 | 42345488 | <i>SLC4A1</i>      | - | pan-negative |
| cg03287877 | 17 | 43139826 | <i>NMT1</i>        | - | pan-negative |
| cg15639951 | 17 | 43367609 | <i>MAP3K14</i>     | - | pan-negative |
| cg05294455 | 17 | 45286609 | <i>MYL4</i>        | - | pan-negative |
| cg13643585 | 17 | 46704004 | <i>HOXB9</i>       | - | pan-negative |
| cg22370370 | 17 | 47439802 | <i>ZNF652</i>      | - | pan-negative |
| cg00892798 | 17 | 47572909 | <i>NGFR</i>        | - | pan-negative |
| cg04582295 | 17 | 48242070 | <i>SGCA</i>        | - | pan-negative |
| cg05942574 | 17 | 48637104 | <i>CACNA1G</i>     | - | pan-negative |
| cg24489015 | 17 | 56316162 | <i>LPO</i>         | - | pan-negative |
| cg09421562 | 17 | 56357994 | <i>MPO</i>         | - | pan-negative |
| cg22182666 | 17 | 56405155 | <i>BZRAP1</i>      | - | pan-negative |
| cg00239419 | 17 | 57969186 | <i>TUBD1</i>       | - | pan-negative |
| cg23181434 | 17 | 60556158 | <i>TLK2</i>        | - | pan-negative |
| cg27178345 | 17 | 61950572 | <i>CSH2</i>        | - | pan-negative |
| cg02856727 | 17 | 61959416 | <i>GH2</i>         | - | pan-negative |
| cg11880211 | 17 | 61973468 | <i>CSH1</i>        | - | pan-negative |
| cg24498554 | 17 | 61974237 | <i>CSH1</i>        | - | pan-negative |
| cg07973967 | 17 | 62009607 | <i>CD79B</i>       | - | pan-negative |
| cg25729716 | 17 | 62010607 | <i>CD79B</i>       | - | pan-negative |
| cg21256649 | 17 | 66507610 | <i>PRKAR1A</i>     | - | pan-negative |
| cg01697732 | 17 | 66597500 | <i>FAM20A</i>      | - | pan-negative |
| cg11856697 | 17 | 72276937 | <i>DNAI2</i>       | - | pan-negative |
| cg06407137 | 17 | 72527515 | <i>CD300LB</i>     | - | pan-negative |
| cg14173969 | 17 | 72541932 | <i>CD300C</i>      | - | pan-negative |
| cg15374234 | 17 | 72709026 | <i>CD300LF</i>     | - | pan-negative |
| cg21885995 | 17 | 74069256 | <i>SRP68</i>       | - | pan-negative |
| cg24164563 | 17 | 74136395 | <i>RNF157-AS1</i>  | - | pan-negative |
| cg04060163 | 17 | 75136271 | <i>SEC14L1</i>     | - | pan-negative |
| cg19056418 | 17 | 76127217 | <i>TMC8</i>        | - | pan-negative |
| cg04398978 | 17 | 77814064 | <i>CBX4</i>        | - | pan-negative |
| cg05569220 | 17 | 79138873 | <i>AATK-AS1</i>    | - | pan-negative |
| cg14417329 | 17 | 80186273 | <i>SLC16A3</i>     | - | pan-negative |

|            |    |          |              |   |              |
|------------|----|----------|--------------|---|--------------|
| cg23384185 | 18 | 657227   | TYMS         | - | pan-negative |
| cg18110535 | 18 | 3012413  | LPIN2        | - | pan-negative |
| cg26755793 | 18 | 24220540 | KCTD1        | - | pan-negative |
| cg04180953 | 18 | 28743074 | DSC1         | - | pan-negative |
| cg04711324 | 18 | 40695633 | RIT2         | - | pan-negative |
| cg08008233 | 18 | 44557819 | TCEB3C       | - | pan-negative |
| cg25314216 | 18 | 55301903 | LOC100505549 | - | pan-negative |
| cg12459502 | 18 | 60904237 | BCL2         | - | pan-negative |
| cg25059899 | 18 | 60904328 | BCL2         | - | pan-negative |
| cg23756272 | 18 | 60904418 | BCL2         | - | pan-negative |
| cg23824713 | 18 | 61157738 | SERPINB5     | - | pan-negative |
| cg10878998 | 18 | 71959092 | CYB5A        | - | pan-negative |
| cg10503234 | 19 | 676739   | FSTL3        | - | pan-negative |
| cg17823175 | 19 | 828170   | AZU1         | - | pan-negative |
| cg09134726 | 19 | 841082   | PRTN3        | - | pan-negative |
| cg16601385 | 19 | 858846   | CFD          | - | pan-negative |
| cg13795840 | 19 | 1274794  | C19orf24     | - | pan-negative |
| cg18138500 | 19 | 2653655  | GNG7         | - | pan-negative |
| cg09630437 | 19 | 2740301  | SLC39A3      | - | pan-negative |
| cg17518965 | 19 | 3178955  | S1PR4        | - | pan-negative |
| cg24310246 | 19 | 3773172  | RAX2         | - | pan-negative |
| cg03752885 | 19 | 3969736  | DAPK3        | - | pan-negative |
| cg24388263 | 19 | 4241983  | 0            | - | pan-negative |
| cg12941931 | 19 | 4559799  | SEMA6B       | - | pan-negative |
| cg19147390 | 19 | 4911058  | UHRF1        | - | pan-negative |
| cg00614413 | 19 | 5286594  | PTPRS        | - | pan-negative |
| cg04993257 | 19 | 5568163  | TINCR        | - | pan-negative |
| cg08256781 | 19 | 6135510  | ACSBG2       | - | pan-negative |
| cg26571739 | 19 | 6772688  | VAV1         | - | pan-negative |
| cg25025866 | 19 | 7598787  | PNPLA6       | - | pan-negative |
| cg01618851 | 19 | 7812265  | CD209        | - | pan-negative |
| cg16504798 | 19 | 8643540  | MYO1F        | - | pan-negative |
| cg07753644 | 19 | 10222175 | P2RY11       | - | pan-negative |
| cg18910313 | 19 | 10222409 | P2RY11       | - | pan-negative |
| cg21663431 | 19 | 10736355 | SLC44A2      | - | pan-negative |
| cg20041257 | 19 | 10828819 | DNM2         | - | pan-negative |
| cg19998328 | 19 | 11038320 | YIPF2        | - | pan-negative |
| cg24477567 | 19 | 11495295 | EPOR         | - | pan-negative |
| cg06192619 | 19 | 15083616 | SLC1A6       | - | pan-negative |
| cg17915429 | 19 | 15590069 | PGLYRP2      | - | pan-negative |
| cg05722906 | 19 | 15783791 | CYP4F12      | - | pan-negative |
| cg19006008 | 19 | 16999768 | F2RL3        | - | pan-negative |
| cg03636183 | 19 | 17000585 | F2RL3        | - | pan-negative |
| cg18145683 | 19 | 17959281 | JAK3         | - | pan-negative |
| cg10011232 | 19 | 18654949 | FKBP8        | - | pan-negative |
| cg00704310 | 19 | 34288103 | KCTD15       | - | pan-negative |
| cg15743985 | 19 | 35819809 | CD22         | - | pan-negative |
| cg03574571 | 19 | 35820181 | CD22         | - | pan-negative |
| cg16927606 | 19 | 36233324 | IGFLR1       | - | pan-negative |
| cg07850221 | 19 | 36235109 | U2AF1L4      | - | pan-negative |
| cg15698196 | 19 | 39236354 | CAPN12       | - | pan-negative |
| cg24030627 | 19 | 40440416 | FCGBP        | - | pan-negative |
| cg07123548 | 19 | 40896163 | HIPK4        | - | pan-negative |
| cg25723866 | 19 | 41099080 | LTBP4        | - | pan-negative |
| cg02043477 | 19 | 41357152 | CYP2A6       | - | pan-negative |
| cg20075229 | 19 | 41388937 | CYP2A7       | - | pan-negative |
| cg25427638 | 19 | 41389357 | CYP2A7       | - | pan-negative |
| cg19756068 | 19 | 41497222 | CYP2B6       | - | pan-negative |
| cg20557104 | 19 | 41934313 | B3GNT8       | - | pan-negative |
| cg21529807 | 19 | 42134478 | CEACAM4      | - | pan-negative |
| cg07297178 | 19 | 42193084 | CEACAM7      | - | pan-negative |
| cg05921699 | 19 | 42380725 | CD79A        | - | pan-negative |
| cg04790874 | 19 | 42381950 | CD79A        | - | pan-negative |
| cg07051960 | 19 | 42499619 | ATP1A3       | - | pan-negative |
| cg09555879 | 19 | 42569956 | GRIK5        | - | pan-negative |
| cg15862544 | 19 | 42840403 | MEGF8        | - | pan-negative |
| cg06475327 | 19 | 43099482 | CEACAM8      | - | pan-negative |
| cg22732515 | 19 | 44031385 | ETHE1        | - | pan-negative |
| cg03257423 | 19 | 44860820 | ZFP112       | - | pan-negative |
| cg08955609 | 19 | 45409353 | APOE         | - | pan-negative |
| cg19154438 | 19 | 45825730 | CKM          | - | pan-negative |
| cg20444256 | 19 | 45826341 | CKM          | - | pan-negative |
| cg08831348 | 19 | 46142212 | EML2         | - | pan-negative |
| cg09997082 | 19 | 46170946 | GIPR         | - | pan-negative |
| cg21072025 | 19 | 47137863 | GNG8         | - | pan-negative |
| cg02149446 | 19 | 47812519 | C5AR1        | - | pan-negative |
| cg03113824 | 19 | 48807322 | CCDC114      | - | pan-negative |
| cg16155702 | 19 | 49260210 | FGF21        | - | pan-negative |
| cg26267310 | 19 | 49340593 | HSD17B14     | - | pan-negative |
| cg04378886 | 19 | 50031395 | RCN3         | - | pan-negative |
| cg07603484 | 19 | 50434179 | NUP62        | - | pan-negative |
| cg09814877 | 19 | 51293677 | ACPT         | - | pan-negative |
| cg19356189 | 19 | 51524690 | KLK10        | - | pan-negative |
| cg09702010 | 19 | 51531393 | KLK11        | - | pan-negative |
| cg13407883 | 19 | 51627843 | SIGLEC9      | - | pan-negative |
| cg03597525 | 19 | 51920435 | SIGLEC10     | - | pan-negative |
| cg16293105 | 19 | 52034970 | SIGLEC6      | - | pan-negative |
| cg16969623 | 19 | 54024182 | ZNF331       | - | pan-negative |
| cg11368509 | 19 | 55851365 | SUV420H2     | - | pan-negative |
| cg23075286 | 19 | 56687199 | GALP         | - | pan-negative |
| cg16519742 | 19 | 57306847 | ZIM2         | - | pan-negative |
| cg02875404 | 19 | 57966896 | VN1R1        | - | pan-negative |
| cg06458239 | 19 | 58038573 | ZNF549       | - | pan-negative |
| cg01947224 | 19 | 58089885 | ZNF416       | - | pan-negative |
| cg13877915 | 19 | 58951672 | ZNF132       | - | pan-negative |

|            |    |          |              |   |              |
|------------|----|----------|--------------|---|--------------|
| cg23036025 | 19 | 59023916 | SLC27A5      | - | pan-negative |
| cg08088390 | 20 | 68170    | DEFB125      | - | pan-negative |
| cg01958189 | 20 | 68396    | DEFB125      | - | pan-negative |
| cg00769470 | 20 | 207338   | DEFB129      | - | pan-negative |
| cg10099900 | 20 | 1093733  | PSMF1        | - | pan-negative |
| cg20210637 | 20 | 1246100  | SNPH         | - | pan-negative |
| cg00176879 | 20 | 2843525  | PTPRA        | - | pan-negative |
| cg16536918 | 20 | 3065403  | AVP          | - | pan-negative |
| cg01869233 | 20 | 6035139  | LRRN4        | - | pan-negative |
| cg25157408 | 20 | 7921059  | HAO1         | - | pan-negative |
| cg09119967 | 20 | 9494838  | LAMP5        | - | pan-negative |
| cg25307902 | 20 | 10199210 | SNAP25       | - | pan-negative |
| cg20907471 | 20 | 21679525 | 0            | - | pan-negative |
| cg23660082 | 20 | 23732166 | CST1         | - | pan-negative |
| cg01237132 | 20 | 23807958 | CST2         | - | pan-negative |
| cg09971811 | 20 | 24930099 | CST7         | - | pan-negative |
| cg22190819 | 20 | 26036118 | FAM182A      | - | pan-negative |
| cg00441136 | 20 | 30864848 | KIF3B        | - | pan-negative |
| cg26331247 | 20 | 31239171 | C20orf203    | - | pan-negative |
| cg18223379 | 20 | 31619647 | BPIFB6       | - | pan-negative |
| cg26111757 | 20 | 31642120 | BPIFB3       | - | pan-negative |
| cg11113534 | 20 | 31756024 | BPIFA2       | - | pan-negative |
| cg01910481 | 20 | 31824068 | BPIFA1       | - | pan-negative |
| cg22789545 | 20 | 31871352 | BPIFB1       | - | pan-negative |
| cg14594876 | 20 | 32031951 | SNTA1        | - | pan-negative |
| cg16796951 | 20 | 34555073 | CNBD2        | - | pan-negative |
| cg19562969 | 20 | 35233582 | C20orf24     | - | pan-negative |
| cg19717150 | 20 | 42984878 | HNFB4        | - | pan-negative |
| cg07064406 | 20 | 43513064 | YWHAB        | - | pan-negative |
| cg20485165 | 20 | 43753049 | WFDC12       | - | pan-negative |
| cg24765446 | 20 | 44167974 | WFDC6        | - | pan-negative |
| cg23765993 | 20 | 44176029 | EPPIN        | - | pan-negative |
| cg02310296 | 20 | 44637358 | MMP9         | - | pan-negative |
| cg03606258 | 20 | 57426935 | GNAS-AS1     | - | pan-negative |
| cg21625881 | 20 | 57430313 | GNAS         | - | pan-negative |
| cg14203179 | 20 | 57430663 | GNAS         | - | pan-negative |
| cg23265096 | 20 | 57582594 | CTSZ         | - | pan-negative |
| cg09076077 | 20 | 58630315 | C20orf197    | - | pan-negative |
| cg14236389 | 20 | 58631038 | C20orf197    | - | pan-negative |
| cg09864990 | 20 | 61041274 | GATA5        | - | pan-negative |
| cg16542081 | 20 | 61041701 | GATA5        | - | pan-negative |
| cg24674220 | 20 | 62251901 | GMEB2        | - | pan-negative |
| cg06653796 | 20 | 62367805 | LIME1        | - | pan-negative |
| cg10071275 | 20 | 62795830 | MYT1         | - | pan-negative |
| cg26287988 | 21 | 11098970 | BAGE         | - | pan-negative |
| cg04807655 | 21 | 32930828 | TIAM1        | - | pan-negative |
| cg08632701 | 21 | 37451849 | LOC100133286 | - | pan-negative |
| cg26024531 | 21 | 37758170 | CHAF1B       | - | pan-negative |
| cg11099899 | 21 | 37852334 | CLDN14       | - | pan-negative |
| cg03993463 | 21 | 39627271 | KCNJ15       | - | pan-negative |
| cg11479877 | 21 | 41029500 | B3GALT5      | - | pan-negative |
| cg00895324 | 21 | 41238517 | PCP4         | - | pan-negative |
| cg20423977 | 21 | 42557641 | PLAC4        | - | pan-negative |
| cg12205591 | 21 | 44588552 | CRYAA        | - | pan-negative |
| cg15536230 | 21 | 44985092 | HSF2BP       | - | pan-negative |
| cg16500334 | 21 | 46238534 | SUMO3        | - | pan-negative |
| cg02066681 | 21 | 46823800 | COL18A1      | - | pan-negative |
| cg05275605 | 21 | 46844883 | COL18A1-AS1  | - | pan-negative |
| cg19837751 | 22 | 17645416 | CECR5        | - | pan-negative |
| cg22815534 | 22 | 17646263 | CECR5        | - | pan-negative |
| cg14727512 | 22 | 19118918 | TSSK2        | - | pan-negative |
| cg15837252 | 22 | 19138822 | GSC2         | - | pan-negative |
| cg12167239 | 22 | 19166808 | SLC25A1      | - | pan-negative |
| cg07251788 | 22 | 19280165 | CLTCL1       | - | pan-negative |
| cg13477510 | 22 | 19700797 | 42618        | - | pan-negative |
| cg02763671 | 22 | 20103541 | RANBP1       | - | pan-negative |
| cg22262140 | 22 | 21986976 | CCDC116      | - | pan-negative |
| cg18604842 | 22 | 21987190 | CCDC116      | - | pan-negative |
| cg12228611 | 22 | 22020169 | PPIL2        | - | pan-negative |
| cg09034836 | 22 | 22986350 | POM121L1P    | - | pan-negative |
| cg10494770 | 22 | 23922454 | IGLL1        | - | pan-negative |
| cg02415431 | 22 | 23923255 | IGLL1        | - | pan-negative |
| cg18365380 | 22 | 24641011 | GGT5         | - | pan-negative |
| cg22764925 | 22 | 24979964 | GGT1         | - | pan-negative |
| cg04541607 | 22 | 27013978 | CRYBB1       | - | pan-negative |
| cg01791232 | 22 | 29469490 | KREMEN1      | - | pan-negative |
| cg01468868 | 22 | 30642653 | LIF          | - | pan-negative |
| cg19539004 | 22 | 30643376 | LIF          | - | pan-negative |
| cg14519350 | 22 | 30661949 | OSM          | - | pan-negative |
| cg08775793 | 22 | 36648692 | APOL1        | - | pan-negative |
| cg09863066 | 22 | 37214864 | PVALB        | - | pan-negative |
| cg17699374 | 22 | 37403802 | TEX33        | - | pan-negative |
| cg08727202 | 22 | 37414747 | TST          | - | pan-negative |
| cg26143719 | 22 | 37584227 | C1QTNF6      | - | pan-negative |
| cg13951472 | 22 | 37956103 | CDC42EP1     | - | pan-negative |
| cg11081833 | 22 | 37975941 | LGALS2       | - | pan-negative |
| cg13474750 | 22 | 38037408 | SH3BP1       | - | pan-negative |
| cg01441777 | 22 | 38714416 | CSNK1E       | - | pan-negative |
| cg20674521 | 22 | 38850521 | KCNJ4        | - | pan-negative |
| cg06229674 | 22 | 39492189 | APOBEC3H     | - | pan-negative |
| cg19622372 | 22 | 42540696 | CYP2D7P1     | - | pan-negative |
| cg25077328 | 22 | 43546988 | TSPO         | - | pan-negative |
| cg07986773 | 22 | 45558609 | LOC100506714 | - | pan-negative |
| cg18954434 | 22 | 46692881 | GTSE1        | - | pan-negative |
| cg05698090 | 22 | 47134664 | CERK         | - | pan-negative |

|            |    |          |                |   |              |
|------------|----|----------|----------------|---|--------------|
| cg11808757 | 22 | 50683907 | <i>TUBGCP6</i> | - | pan-negative |
|------------|----|----------|----------------|---|--------------|

---

<sup>a</sup>Probe IDs for the Infinium HumanMethylation27 BeadChip (Illumina). <sup>b</sup>National Center for Biotechnology Information (NCBI) Database (Genome Build 37).

Supplementary Table 7. The number of probes showing significant differences in DNA methylation levels between non-cancerous and cancerous tissue samples which are shared by patients belonging to the EGFR mutation, ALK fusion, KRAS mutation, ROS1 fusion, HER2 mutation and pan-negative groups.

| Number of genomic driver aberration groups sharing DNA methylation alteration | Genomic driver aberration groups             | Number of probes |
|-------------------------------------------------------------------------------|----------------------------------------------|------------------|
| -                                                                             | EGFR                                         | 1,948            |
| -                                                                             | ALK                                          | 18               |
| -                                                                             | KRAS                                         | 4                |
| -                                                                             | ROS1                                         | 4                |
| -                                                                             | HER2                                         | 3                |
| -                                                                             | Pan-negative                                 | 1,297            |
| 2                                                                             | EGFR and ALK                                 | 18               |
| 2                                                                             | EGFR and KRAS                                | 1                |
| 2                                                                             | EGFR and ROS1                                | 17               |
| 2                                                                             | EGFR and pan-negative                        | 6,291            |
| 2                                                                             | ALK and pan-negative                         | 2                |
| 2                                                                             | KRAS and ROS1                                | 1                |
| 2                                                                             | KRAS and pan-negative                        | 5                |
| 2                                                                             | ROS1 and pan-negative                        | 3                |
| 3                                                                             | EGFR, ALK and ROS1                           | 1                |
| 3                                                                             | EGFR, ALK and pan-negative                   | 240              |
| 3                                                                             | EGFR, KRAS and pan-negative                  | 436              |
| 3                                                                             | EGFR, ROS1 and pan-negative                  | 157              |
| 3                                                                             | EGFR, HER2 and pan-negative                  | 38               |
| 3                                                                             | ALK, ROS1 and pan-negative                   | 1                |
| 3                                                                             | KRAS, HER2 and pan-negative                  | 1                |
| 4                                                                             | EGFR, ALK, KRAS and pan-negative             | 112              |
| 4                                                                             | EGFR, ALK, ROS1 and pan-negative             | 73               |
| 4                                                                             | EGFR, ALK, HER2 and pan-negative             | 13               |
| 4                                                                             | EGFR, KRAS, ROS1 and pan-negative            | 89               |
| 4                                                                             | EGFR, KRAS, HER2 and pan-negative            | 17               |
| 4                                                                             | EGFR, ROS1, HER2 and pan-negative            | 4                |
| 5                                                                             | EGFR, ALK, KRAS, ROS1 and pan-negative       | 102              |
| 5                                                                             | EGFR, ALK, KRAS, HER2 and pan-negative       | 8                |
| 5                                                                             | EGFR, ALK, ROS1, HER2 and pan-negative       | 3                |
| 5                                                                             | EGFR, KRAS, ROS1, HER2 and pan-negative      | 6                |
| 6                                                                             | EGFR, ALK, KRAS, ROS1, HER2 and pan-negative | 9                |

Supplementary Table 8A. The 197 genes commonly showing significant differences in DNA methylation levels between non-cancerous and cancerous tissue samples in two or more genomic driver aberration groups, for which DNA methylation alterations would potentially result in mRNA expression alterations.

| Gene symbol | Probe ID*              | Genomic Driver aberration groups sharing DNA methylation alterations     | Annotation of CpG island <sup>b</sup>               | Inverse correlation between DNA methylation levels and mRNA expression levels <sup>a</sup> |          |
|-------------|------------------------|--------------------------------------------------------------------------|-----------------------------------------------------|--------------------------------------------------------------------------------------------|----------|
|             |                        |                                                                          |                                                     | Pearson correlation coefficient, r                                                         | P        |
| ADARB2      | cg05307923; cg14590817 | EGFR and pan-negative; EGFR and pan-negative                             | 5UTR/1st exon/1st intron; TSS200                    | -0.222                                                                                     | 1.61E-14 |
| ADRA2A      | cg26926521             | EGFR and pan-negative                                                    | 5UTR/1st exon/1st intron                            | -0.212                                                                                     | 1.95E-07 |
| ADRB1       | cg14826456             | EGFR, ALK and pan-negative                                               | 1st exon/1st intron                                 | -0.209                                                                                     | 0.00E+00 |
| AKR1B1      | cg13801416; cg18416881 | EGFR and pan-negative; EGFR and pan-negative                             | TSS200; 5UTR/1st exon/1st intron                    | -0.222                                                                                     | 1.72E-02 |
| ALDH1A2     | cg09008373; cg03365437 | EGFR and pan-negative; EGFR and pan-negative                             | 5UTR/1st exon/1st intron; 5UTR/1st exon/1st intron  | -0.242                                                                                     | 3.32E-07 |
| ALDH1A3     | cg19177941             | EGFR and pan-negative                                                    | 1st exon/1st intron                                 | -0.203                                                                                     | 2.05E-03 |
| ALPL        | cg20645065             | EGFR, KRAS and pan-negative                                              | 5UTR/Gene body/1st intron                           | -0.401                                                                                     | 0.00E+00 |
| ARRDC4      | cg05595345; cg09149294 | EGFR and pan-negative; EGFR and pan-negative                             | 1st exon/1st intron; TSS200                         | -0.254                                                                                     | 0.00E+00 |
| ASCL2       | cg06263495             | EGFR, KRAS and pan-negative                                              | 5UTR/1st exon/1st intron                            | -0.385                                                                                     | 4.58E-11 |
| ATP10A      | cg17793621             | EGFR and pan-negative                                                    | 1st exon/1st intron                                 | -0.221                                                                                     | 0.00E+00 |
| B3GAT1      | cg07845566; cg11038843 | EGFR and pan-negative; EGFR and pan-negative                             | TSS1500; 5UTR/Gene body/1st intron                  | -0.273                                                                                     | 0.00E+00 |
| BNMPR1A     | cg06817917             | EGFR, KRAS and pan-negative                                              | TSS1500                                             | -0.263                                                                                     | 1.11E-16 |
| BOLL        | cg10124201; cg17560332 | EGFR, KRAS and pan-negative; EGFR, KRAS and pan-negative                 | 5UTR/1st exon/1st intron; TSS1500                   | -0.256                                                                                     | 1.19E-05 |
| BRDT        | cg14732540             | EGFR and pan-negative                                                    | TSS1500                                             | -0.34                                                                                      | 4.32E-13 |
| BTBD11      | cg08612037; cg15796941 | EGFR and pan-negative; EGFR and pan-negative                             | 5UTR/1st exon/1st intron; TSS1500                   | -0.264                                                                                     | 6.66E-16 |
| BVES        | cg20624391             | EGFR and pan-negative                                                    | 5UTR/1st exon/1st intron                            | -0.279                                                                                     | 0.00E+00 |
| C10orf35    | cg22368262             | EGFR and pan-negative                                                    | 5UTR/Gene body/1st intron                           | -0.286                                                                                     | 1.11E-16 |
| C10orf32    | cg07621046; cg17349199 | EGFR and pan-negative; EGFR, ALK and pan-negative                        | TSS200; 5UTR/1st exon/1st intron                    | -0.317                                                                                     | 7.40E-04 |
| C16orf45    | cg26713220             | EGFR and pan-negative                                                    | 1st exon/1st intron                                 | -0.269                                                                                     | 8.77E-10 |
| CADPS       | cg21458907             | EGFR, ALK, ROS1 and pan-negative                                         | 5UTR/1st exon/1st intron                            | -0.22                                                                                      | 1.97E-02 |
| CALML5      | cg24392574             | EGFR and pan-negative                                                    | 5UTR/1st exon/1st intron                            | -0.71                                                                                      | 9.74E-04 |
| CBS         | cg22633722             | EGFR and pan-negative                                                    | TSS1500                                             | -0.334                                                                                     | 0.00E+00 |
| CDCP1       | cg24975222             | EGFR and pan-negative                                                    | 1st exon/1st intron                                 | -0.216                                                                                     | 0.00E+00 |
| CDH1        | cg11255163; cg23989635 | EGFR and pan-negative; EGFR and pan-negative                             | 5UTR/1st exon/1st intron; 5UTR/1st exon/1st intron  | -0.244                                                                                     | 1.11E-16 |
| CDH2        | cg09313439             | EGFR and pan-negative                                                    | 5UTR/1st exon/1st intron                            | -0.223                                                                                     | 1.63E-08 |
| CDK10       | cg12119029             | EGFR and pan-negative                                                    | TSS200                                              | -0.217                                                                                     | 1.11E-16 |
| CDO1        | cg12880568             | EGFR, KRAS and pan-negative                                              | 5UTR/1st exon/1st intron                            | -0.244                                                                                     | 0.00E+00 |
| CHAD        | cg06818777; cg06958829 | EGFR, HER2 and pan-negative; EGFR and pan-negative                       | TSS1500; 1st exon/1st intron                        | -0.243                                                                                     | 7.36E-03 |
| CHRNB1      | cg04809787; cg18884137 | EGFR, ALK, ROS1 and pan-negative; EGFR and pan-negative                  | TSS200; 1st exon/1st intron                         | -0.275                                                                                     | 3.33E-16 |
| CITED4      | cg22748573             | EGFR and pan-negative                                                    | 5UTR/1st exon/1st intron                            | -0.233                                                                                     | 2.47E-02 |
| CLDN4       | cg15544036             | EGFR and pan-negative                                                    | 1st exon/1st intron                                 | -0.302                                                                                     | 3.33E-16 |
| CNNM1       | cg15430659             | EGFR and pan-negative                                                    | 1st exon/1st intron                                 | -0.234                                                                                     | 0.00E+00 |
| CNTN1       | cg27352992             | EGFR and pan-negative                                                    | 5UTR/Gene body/1st intron                           | -0.215                                                                                     | 9.59E-06 |
| COX6A2      | cg13726463             | EGFR and pan-negative                                                    | 5UTR/1st exon/1st intron                            | -0.428                                                                                     | 5.34E-04 |
| COX8C       | cg27651218             | EGFR and pan-negative                                                    | TSS200                                              | -0.484                                                                                     | 3.41E-02 |
| CPLX2       | cg19885761             | EGFR, ALK and pan-negative                                               | 5UTR/1st exon/1st intron                            | -0.274                                                                                     | 5.07E-05 |
| CSNK1G2     | cg26776924             | EGFR and pan-negative                                                    | 5UTR/1st intron                                     | -0.206                                                                                     | 0.00E+00 |
| CTNND2      | cg25302419             | EGFR and pan-negative                                                    | 5UTR/1st exon/1st intron                            | -0.212                                                                                     | 8.01E-03 |
| CYBSR2      | cg03826976             | EGFR and pan-negative                                                    | TSS1500                                             | -0.344                                                                                     | 7.56E-07 |
| DKE         | cg01344452             | EGFR and pan-negative                                                    | 5UTR/1st intron                                     | -0.453                                                                                     | 3.33E-16 |
| DIO3        | cg04623955             | EGFR, HER2 and pan-negative                                              | TSS1500                                             | -0.208                                                                                     | 5.74E-03 |
| DMRTA1      | cg22007439             | EGFR and pan-negative                                                    | 5UTR/1st exon/1st intron                            | -0.425                                                                                     | 5.37E-08 |
| DOX5        | cg09260441             | EGFR and pan-negative                                                    | TSS1500                                             | -0.228                                                                                     | 0.00E+00 |
| DRD1        | cg16112129; cg17307280 | EGFR and pan-negative; EGFR and pan-negative                             | 5UTR/1st exon/1st intron; TSS1500                   | -0.266                                                                                     | 1.61E-03 |
| EFEMP2      | cg02586730             | EGFR, KRAS and pan-negative                                              | 5UTR/Gene body/1st intron                           | -0.22                                                                                      | 3.33E-16 |
| EFS         | cg17606785             | EGFR and pan-negative                                                    | 5UTR/1st exon/1st intron                            | -0.385                                                                                     | 3.27E-08 |
| EGLN3       | cg05769169             | EGFR and pan-negative                                                    | 1st exon/1st intron                                 | -0.262                                                                                     | 0.00E+00 |
| EIF5A2      | cg10541755             | EGFR and pan-negative                                                    | 5UTR/Gene body/1st intron                           | -0.319                                                                                     | 2.33E-07 |
| ELMO3       | cg25341653             | EGFR and pan-negative                                                    | 1st exon/1st intron                                 | -0.381                                                                                     | 3.33E-16 |
| ELOVL4      | cg13297865             | EGFR and pan-negative                                                    | TSS200                                              | -0.324                                                                                     | 1.55E-15 |
| EPN2        | cg05492503             | EGFR and pan-negative                                                    | 5UTR/1st exon/1st intron                            | -0.244                                                                                     | 1.22E-15 |
| ETV7        | cg04289385             | EGFR and pan-negative                                                    | TSS1500                                             | -0.276                                                                                     | 0.00E+00 |
| EYA2        | cg09306675             | EGFR and pan-negative                                                    | 5UTR/Gene body/1st intron                           | -0.407                                                                                     | 2.74E-14 |
| FADS2       | cg06781209; cg07005513 | EGFR and pan-negative; EGFR and pan-negative                             | TSS1500; 1st exon/1st intron                        | -0.253                                                                                     | 1.67E-05 |
| FAM84A      | cg14225405; cg14789259 | EGFR, HER2 and pan-negative; EGFR and pan-negative                       | TSS1500; 5UTR/Gene body/1st intron                  | -0.347                                                                                     | 4.03E-09 |
| FAM84B      | cg23179168             | EGFR and pan-negative                                                    | 5UTR/Gene body/1st intron                           | -0.212                                                                                     | 4.44E-16 |
| FOXB1       | cg08583049; cg22777952 | EGFR, ALK and pan-negative; EGFR and pan-negative                        | 5UTR/1st exon/1st intron; 5UTR/1st exon/1st intron  | -0.228                                                                                     | 6.46E-10 |
| FUT4        | cg00796728             | EGFR and pan-negative                                                    | TSS200                                              | -0.496                                                                                     | 2.69E-08 |
| FZD10       | cg23054883             | EGFR, KRAS and pan-negative                                              | 1st exon/1st intron                                 | -0.255                                                                                     | 1.08E-05 |
| GALNT14     | cg22395019             | EGFR and ROS1                                                            | TSS200                                              | -0.235                                                                                     | 0.00E+00 |
| GBG1        | cg01169778             | EGFR and pan-negative                                                    | 5UTR/Gene body/1st intron                           | -0.377                                                                                     | 2.95E-03 |
| GDA         | cg08768421             | EGFR and pan-negative                                                    | 1st exon/1st intron                                 | -0.249                                                                                     | 1.06E-09 |
| GIPC2       | cg24496666             | EGFR, KRAS and pan-negative                                              | 1st exon/1st intron                                 | -0.347                                                                                     | 0.00E+00 |
| GPR160      | cg18741908; cg26575445 | EGFR, ALK, ROS1 and pan-negative; EGFR, ALK, KRAS, ROS1 and pan-negative | 5UTR/1st intron; 5UTR/Gene body/1st intron          | -0.299                                                                                     | 6.66E-16 |
| GPR75       | cg14832904             | EGFR and pan-negative                                                    | 5UTR/1st exon/1st intron                            | -0.206                                                                                     | 5.21E-03 |
| GPRC5C      | cg07789083; cg23953396 | EGFR and pan-negative; EGFR and pan-negative                             | TSS200; 5UTR/1st exon/1st intron                    | -0.224                                                                                     | 0.00E+00 |
| GPK7        | cg22129364             | EGFR and pan-negative                                                    | TSS200                                              | -0.402                                                                                     | 0.00E+00 |
| H2AFY2      | cg14617642; cg17163751 | EGFR and pan-negative; EGFR and pan-negative                             | 5UTR/1st exon/1st intron; 5UTR/1st exon/1st intron  | -0.406                                                                                     | 8.82E-10 |
| HCM4        | cg02860342; cg24396745 | EGFR and pan-negative; EGFR, HER2 and pan-negative                       | 5UTR/1st exon/1st intron; 5UTR/1st exon/1st intron  | -0.21                                                                                      | 1.34E-03 |
| HIST1H2AG   | cg08717396; cg24358465 | EGFR and pan-negative; EGFR and pan-negative                             | TSS200; 1st exon/1st intron                         | -0.313                                                                                     | 3.33E-16 |
| HIST1H3E    | cg07822606             | EGFR, KRAS and pan-negative                                              | 1st exon/1st intron                                 | -0.208                                                                                     | 0.00E+00 |
| HIST1H4D    | cg21026663             | EGFR and pan-negative                                                    | 1st exon/1st intron                                 | -0.222                                                                                     | 2.42E-11 |
| HIST1H4E    | cg08687901; cg16706631 | EGFR and pan-negative; EGFR and pan-negative                             | 1st exon/1st intron; TSS200                         | -0.306                                                                                     | 6.05E-14 |
| HOXA4       | cg04317399             | EGFR, ALK, ROS1 and pan-negative                                         | 1st exon/1st intron                                 | -0.291                                                                                     | 0.00E+00 |
| HOXB9       | cg12370791             | EGFR and pan-negative                                                    | 5UTR/1st exon/1st intron                            | -0.21                                                                                      | 4.26E-07 |
| HOXC10      | cg08900043; cg26153631 | EGFR, ALK and pan-negative; EGFR, ROS1 and pan-negative                  | TSS200; 1st exon/1st intron                         | -0.349                                                                                     | 3.33E-16 |
| HOXC11      | cg07123069; cg22709192 | EGFR, ALK, ROS1 and pan-negative; EGFR, ALK, KRAS and pan-negative       | 5UTR/1st exon/1st intron; 5UTR/1st exon/1st intron  | -0.502                                                                                     | 6.66E-16 |
| HOXC9       | cg21272774             | EGFR, ALK and pan-negative                                               | TSS200                                              | -0.23                                                                                      | 1.11E-16 |
| HSPA2       | cg16319578; cg27120999 | EGFR and pan-negative; EGFR, KRAS and pan-negative                       | 5UTR/1st exon/1st intron; 1st exon/1st intron       | -0.232                                                                                     | 4.51E-02 |
| HSPB9       | cg02968557; cg05346140 | EGFR and pan-negative; EGFR and pan-negative                             | 1st exon/1st intron; 1st exon/1st intron            | -0.41                                                                                      | 0.00E+00 |
| HTR1B       | cg08614481; cg25763788 | EGFR and pan-negative; EGFR and pan-negative                             | TSS200; 1st exon/1st intron                         | -0.212                                                                                     | 1.51E-02 |
| IGFBP1      | cg06638433; cg13877465 | EGFR and pan-negative; EGFR and pan-negative                             | 1st exon/1st intron; TSS200                         | -0.346                                                                                     | 1.28E-10 |
| IGFBP3      | cg26187237             | EGFR and pan-negative                                                    | 1st exon/1st intron                                 | -0.263                                                                                     | 8.88E-16 |
| IGFBP3      | cg04796162; cg15898840 | EGFR and pan-negative; EGFR and pan-negative                             | TSS1500; 5UTR/1st exon/1st intron                   | -0.215                                                                                     | 3.33E-16 |
| IL20RA      | cg04481778             | EGFR, ALK and pan-negative                                               | 5UTR/1st exon/1st intron                            | -0.215                                                                                     | 0.00E+00 |
| INA         | cg23642174; cg25764191 | EGFR, KRAS and pan-negative; EGFR and pan-negative                       | TSS1500; 1st exon/1st intron                        | -0.281                                                                                     | 1.21E-07 |
| INSL6       | cg11830061             | EGFR and pan-negative                                                    | 1st exon/1st intron                                 | -0.417                                                                                     | 8.23E-03 |
| IRX2        | cg15433631             | EGFR and pan-negative                                                    | 5UTR/1st exon/1st intron                            | -0.439                                                                                     | 0.00E+00 |
| IRX5        | cg05362516             | EGFR and pan-negative                                                    | TSS200                                              | -0.397                                                                                     | 1.80E-10 |
| ISYNA1      | cg09374949; cg11102782 | EGFR and pan-negative; EGFR and pan-negative                             | 1st exon/1st intron; TSS200                         | -0.346                                                                                     | 0.00E+00 |
| ITPKB       | cg16340268             | EGFR and pan-negative                                                    | 5UTR/1st intron                                     | -0.243                                                                                     | 0.00E+00 |
| KAZALD1     | cg07638935; cg15302379 | EGFR and pan-negative; EGFR, ROS1 and pan-negative                       | 5UTR/1st exon/1st intron; 5UTR/1st exon/1st intron  | -0.461                                                                                     | 1.11E-16 |
| KCNGB3      | cg27553955             | EGFR, ALK, KRAS and pan-negative                                         | 1st exon/1st intron                                 | -0.335                                                                                     | 9.13E-04 |
| KCNK1       | cg14249872             | EGFR and pan-negative                                                    | TSS200                                              | -0.31                                                                                      | 3.33E-16 |
| KIF1A       | cg14662379; cg21321735 | EGFR and pan-negative; EGFR and pan-negative                             | 5UTR/Gene body/1st intron; TSS1500                  | -0.271                                                                                     | 1.32E-11 |
| KLF11       | cg02983451             | EGFR and pan-negative                                                    | TSS1500                                             | -0.37                                                                                      | 0.00E+00 |
| LEPREL1     | cg18626709             | EGFR and pan-negative                                                    | 5UTR/1st exon/1st intron                            | -0.255                                                                                     | 1.11E-16 |
| LPHGR       | cg12351433             | EGFR and pan-negative                                                    | TSS200                                              | -0.207                                                                                     | 2.46E-09 |
| LPH1        | cg09863772             | EGFR and pan-negative                                                    | TSS1500                                             | -0.213                                                                                     | 9.14E-07 |
| LRR4        | cg15087147             | EGFR and pan-negative                                                    | TSS1500                                             | -0.33                                                                                      | 1.11E-16 |
| LRR61       | cg07753583             | EGFR and pan-negative                                                    | TSS200                                              | -0.246                                                                                     | 4.44E-16 |
| MAP1B       | cg02001410; cg07380496 | EGFR and pan-negative; EGFR and pan-negative                             | TSS200; 1st exon/1st intron                         | -0.214                                                                                     | 5.24E-12 |
| MT1E        | cg15134649             | EGFR and pan-negative                                                    | TSS1500                                             | -0.206                                                                                     | 1.19E-10 |
| MYO3A       | cg08441170; cg23771603 | EGFR and pan-negative; EGFR, HER2 and pan-negative                       | 5UTR/1st exon/1st intron; 5UTR/Gene body/1st intron | -0.256                                                                                     | 4.40E-06 |
| MYRIP       | cg19547629             | EGFR and pan-negative                                                    | 5UTR/Gene body/1st intron                           | -0.264                                                                                     | 0.00E+00 |
| NAV1        | cg14920846             | EGFR and pan-negative                                                    | 1st exon/1st intron                                 | -0.23                                                                                      | 3.33E-16 |
| NCOR1       | cg24443925             | EGFR and pan-negative                                                    | 5UTR/1st exon/1st intron                            | -0.21                                                                                      | 4.33E-08 |
| NEFH        | cg02994956; cg16042149 | EGFR, ALK, KRAS and pan-negative; EGFR and pan-negative                  | 1st exon/1st intron; TSS1500                        | -0.381                                                                                     | 1.71E-07 |
| NELL1       | cg17371081; cg20113732 | EGFR and pan-negative; EGFR and pan-negative                             | TSS200; 5UTR/1st exon/1st intron                    | -0.239                                                                                     | 3.37E-11 |
| NYF8        | cg10954182             | EGFR and pan-negative                                                    | TSS1500                                             | -0.258                                                                                     | 0.00E+00 |
| NHLRC1      | cg22736354             | EGFR and pan-negative                                                    | 1st exon/1st intron                                 | -0.338                                                                                     | 1.11E-16 |
| NMNAT3      | cg15878317             | EGFR and pan-negative                                                    | 5UTR/1st exon/1st intron                            | -0.376                                                                                     | 0.00E+00 |
| NPTX2       | cg00548268; cg12799895 | EGFR, ALK and pan-negative; EGFR and pan-negative                        | TSS1500; 5UTR/1st exon/1st intron                   | -0.216                                                                                     | 2.32E-04 |
| NR2F2       | cg04943986; cg08370996 | EGFR and pan-negative; EGFR and pan-negative                             | TSS1500; TSS200                                     | -0.27                                                                                      | 3.33E-16 |
| OLFM1       | cg27286999             | EGFR and pan-negative                                                    | 5UTR/1st exon/1st intron                            | -0.293                                                                                     | 0.00E+00 |
| OPRK1       | cg25990647             | EGFR and pan-negative                                                    | 5UTR/1st exon/1st intron                            | -0.263                                                                                     | 9.74E-11 |
| OXT         | cg26955850             | EGFR and pan-negative                                                    | 1st exon/1st intron                                 | -0.516                                                                                     | 6.89E-10 |
| PAX7        | cg07536847; cg11428724 | EGFR, HER2 and pan-negative; EGFR and pan-negative                       | TSS1500; 5UTR/1st exon/1st intron                   | -0.278                                                                                     | 9.84E-09 |
| PCSK1       | cg23187653             | EGFR, ALK and pan-negative                                               | TSS200                                              | -0.222                                                                                     | 6.14E-04 |
| PCSK6       | cg20249919             | EGFR, KRAS and pan-negative                                              | 1st exon/1st intron                                 | -0.371                                                                                     | 0.00E+00 |
| PDE10A      | cg01431114; cg24133115 | EGFR and pan-negative; EGFR and pan-negative                             | TSS1500; 5UTR/1st exon/1st intron                   | -0.285                                                                                     | 1.82E-06 |
| PDE3A       | cg24975564             | EGFR and pan-negative                                                    | 1st exon/1st intron                                 | -0.2                                                                                       | 6.10E-06 |
| PDE3B       | cg05532892             | EGFR and pan-negative                                                    | 1st exon/1st intron                                 | -0.287                                                                                     | 0.00E+00 |
| PDE8B       | cg18089852             | EGFR and pan-negative                                                    | 1st exon/1st intron                                 | -0.217                                                                                     | 0.00E+00 |
| PGBD1       | cg20029652             | EGFR and pan-negative                                                    | 5UTR/1st exon/1st intron                            | -0.211                                                                                     | 1.15E-02 |

|          |                                                           |                                                                                                                   |                                                                                                                |        |          |
|----------|-----------------------------------------------------------|-------------------------------------------------------------------------------------------------------------------|----------------------------------------------------------------------------------------------------------------|--------|----------|
| PHYHIP1L | cg13686115; cg25946758                                    | EGFR, KRAS and pan-negative; EGFR and pan-negative                                                                | 1st exon/1st intron; TSS1500                                                                                   | -0.207 | 8.94E-05 |
| PKIA     | cg27140220                                                | EGFR and pan-negative                                                                                             | 5'UTR/1st exon/1st intron                                                                                      | -0.216 | 3.14E-12 |
| PKP1     | cg09009380; cg19570545                                    | EGFR and pan-negative; EGFR and pan-negative                                                                      | 1st exon/1st intron; TSS200                                                                                    | -0.353 | 1.08E-10 |
| PNMA2    | cg02154186                                                | EGFR and pan-negative                                                                                             | 5'UTR/1st exon/1st intron                                                                                      | -0.218 | 1.11E-04 |
| POLR3D   | cg01173603                                                | EGFR and pan-negative                                                                                             | 5'UTR/1st exon/1st intron                                                                                      | -0.203 | 0.00E+00 |
| PPP1R3D  | cg00400263; cg20707333                                    | EGFR and pan-negative; EGFR and pan-negative                                                                      | 1st exon/1st intron; 1st exon/1st intron                                                                       | -0.304 | 1.53E-09 |
| PRAME    | cg05208878                                                | EGFR and pan-negative                                                                                             | TSS200                                                                                                         | -0.319 | 0.00E+00 |
| PRDM16   | cg08528984                                                | EGFR and pan-negative                                                                                             | TSS1500                                                                                                        | -0.425 | 0.00E+00 |
| PRLHR    | cg16196812                                                | EGFR, ALK and pan-negative                                                                                        | 5'UTR/1st exon/1st intron                                                                                      | -0.216 | 4.04E-02 |
| PROCA1   | cg19462352                                                | EGFR and pan-negative                                                                                             | 1st exon/1st intron                                                                                            | -0.232 | 7.33E-15 |
| PTPRE    | cg24678429                                                | EGFR and pan-negative                                                                                             | 5'UTR/Gene body/1st intron                                                                                     | -0.275 | 9.29E-08 |
| PXDN     | cg12164282; cg14037665                                    | EGFR and pan-negative; EGFR and pan-negative                                                                      | 1st exon/1st intron; TSS1500                                                                                   | -0.244 | 0.00E+00 |
| RAB31    | cg17982102                                                | EGFR and pan-negative                                                                                             | TSS1500                                                                                                        | -0.257 | 0.00E+00 |
| RASSF5   | cg10167296; cg17558126                                    | EGFR and pan-negative; EGFR and pan-negative                                                                      | TSS1500; TSS1500                                                                                               | -0.233 | 0.00E+00 |
| RIC3     | cg08383315                                                | EGFR and pan-negative                                                                                             | 1st exon/1st intron                                                                                            | -0.387 | 0.00E+00 |
| RIMS4    | cg19332710                                                | EGFR and pan-negative                                                                                             | 1st exon/1st intron                                                                                            | -0.229 | 0.00E+00 |
| RPL39L   | cg07693270                                                | EGFR and pan-negative                                                                                             | 5'UTR/Gene body/1st intron                                                                                     | -0.267 | 1.11E-16 |
| RPS8KL1  | cg26651843                                                | EGFR and pan-negative                                                                                             | TSS1500                                                                                                        | -0.287 | 6.86E-16 |
| SALL1    | cg22674717                                                | EGFR and pan-negative                                                                                             | TSS1500                                                                                                        | -0.242 | 6.70E-10 |
| SCUBE3   | cg21604042                                                | EGFR and pan-negative                                                                                             | TSS1500                                                                                                        | -0.223 | 1.11E-16 |
| SH3BP4   | cg14061619; cg15144793                                    | EGFR and pan-negative; EGFR and pan-negative                                                                      | TSS1500; 5'UTR/Gene body/1st intron                                                                            | -0.244 | 1.65E-13 |
| SH3GL2   | cg17398595; cg17977409                                    | EGFR and pan-negative; EGFR and pan-negative                                                                      | TSS1500; 5'UTR/1st exon/1st intron                                                                             | -0.214 | 0.00E+00 |
| SIX1     | cg02583151                                                | EGFR and pan-negative                                                                                             | TSS200                                                                                                         | -0.327 | 1.11E-16 |
| SLC16A5  | cg27619475                                                | EGFR and pan-negative                                                                                             | 5'UTR/1st exon/1st intron                                                                                      | -0.28  | 0.00E+00 |
| SLC22A3  | cg07237939                                                | EGFR and pan-negative                                                                                             | 1st exon/1st intron                                                                                            | -0.283 | 0.00E+00 |
| SLC24A3  | cg01557989                                                | EGFR and pan-negative                                                                                             | TSS1500                                                                                                        | -0.244 | 3.33E-16 |
| SLC44A3  | cg20059151                                                | EGFR, ALK and pan-negative                                                                                        | 5'UTR/Gene body/1st intron                                                                                     | -0.223 | 4.11E-04 |
| SMOC1    | cg15239123                                                | EGFR and pan-negative                                                                                             | 1st exon/1st intron                                                                                            | -0.28  | 2.50E-14 |
| SMPO3    | cg00891541; cg10556064; cg22116290                        | EGFR, ALK and pan-negative; EGFR, ALK and pan-negative; EGFR and pan-negative                                     | 5'UTR/Gene body/1st intron; 5'UTR/Gene body/1st intron; 5'UTR/Gene body/1st intron                             | -0.224 | 2.12E-05 |
| SNCA     | cg15452573                                                | EGFR and pan-negative                                                                                             | TSS1500; 5'UTR/Gene body/1st intron;                                                                           | -0.236 | 0.00E+00 |
| SNRPN    | cg2305723; cg22678136; cg24993443; cg25657700; cg25978208 | EGFR and pan-negative; EGFR and pan-negative; EGFR and pan-negative; EGFR and pan-negative; EGFR and pan-negative | 5'UTR/Gene body/1st intron; 5'UTR/Gene body/1st intron; 5'UTR/Gene body/1st intron; 5'UTR/Gene body/1st intron | -0.468 | 2.73E-14 |
| SOX1     | cg06615478; cg22303211                                    | EGFR, KRAS and pan-negative; EGFR, KRAS, ROS1 and pan-negative                                                    | 5'UTR/Gene body/1st intron                                                                                     | -0.207 | 1.18E-04 |
| SOX2     | cg15105987                                                | EGFR, KRAS and pan-negative                                                                                       | TSS200; 1st exon/1st intron                                                                                    | -0.253 | 6.33E-15 |
| SOX21    | cg11208483; cg19063972                                    | EGFR, KRAS, ROS1 and pan-negative; EGFR and pan-negative                                                          | 1st exon/1st intron                                                                                            | -0.231 | 2.22E-15 |
| SOX30    | cg10715231                                                | EGFR and pan-negative                                                                                             | TSS200                                                                                                         | -0.619 | 5.98E-11 |
| SPINT1   | cg04868764                                                | EGFR and pan-negative                                                                                             | 1st exon/1st intron                                                                                            | -0.284 | 0.00E+00 |
| STEAP2   | cg09450020                                                | EGFR and pan-negative                                                                                             | 5'UTR/Gene body/1st intron                                                                                     | -0.207 | 0.00E+00 |
| STMN1    | cg04471507; cg23323671                                    | EGFR and pan-negative; EGFR and pan-negative                                                                      | TSS200; TSS1500                                                                                                | -0.201 | 0.00E+00 |
| SULT4A1  | cg05472874                                                | EGFR and pan-negative                                                                                             | 1st exon/1st intron                                                                                            | -0.362 | 6.66E-16 |
| SYN2     | cg04172348                                                | EGFR and pan-negative                                                                                             | 5'UTR/1st exon/1st intron                                                                                      | -0.204 | 0.00E+00 |
| SYT10    | cg00902195                                                | EGFR and pan-negative                                                                                             | 5'UTR/1st exon/1st intron                                                                                      | -0.202 | 6.46E-04 |
| TCP11    | cg22407458                                                | EGFR and pan-negative                                                                                             | 5'UTR/1st exon/1st intron                                                                                      | -0.612 | 1.58E-05 |
| TDRD5    | cg09656934; cg12277666                                    | EGFR, ALK and pan-negative; EGFR and pan-negative                                                                 | 5'UTR/Gene body/1st intron; 5'UTR/1st exon/1st intron                                                          | -0.517 | 0.00E+00 |
| TKTL2    | cg05745457                                                | EGFR and pan-negative                                                                                             | 1st exon/1st intron                                                                                            | -0.493 | 3.20E-04 |
| TMPSR52  | cg24901042                                                | EGFR and pan-negative                                                                                             | TSS1500                                                                                                        | -0.276 | 0.00E+00 |
| TRIM68   | cg07533148; cg20855565                                    | EGFR, KRAS, ROS1 and pan-negative; EGFR, KRAS and pan-negative                                                    | 1st exon/1st intron; TSS200                                                                                    | -0.248 | 0.00E+00 |
| TSPYL5   | cg15747595                                                | EGFR and pan-negative                                                                                             | 1st exon/1st intron                                                                                            | -0.594 | 4.86E-09 |
| TTC22    | cg22130834                                                | EGFR and pan-negative                                                                                             | TSS200                                                                                                         | -0.314 | 5.55E-16 |
| UACA     | cg08815652                                                | EGFR and pan-negative                                                                                             | 1st exon/1st intron                                                                                            | -0.215 | 0.00E+00 |
| UBE2E3   | cg00949554                                                | EGFR and pan-negative                                                                                             | 5'UTR/1st exon/1st intron                                                                                      | -0.246 | 0.00E+00 |
| UPB1     | cg17647273                                                | EGFR and pan-negative                                                                                             | 1st exon/1st intron                                                                                            | -0.212 | 2.20E-06 |
| WBSR17   | cg01366419                                                | EGFR and pan-negative                                                                                             | TSS1500                                                                                                        | -0.357 | 6.63E-11 |
| WNK2     | cg16158807; cg20616414                                    | EGFR and pan-negative; EGFR and pan-negative                                                                      | TSS1500; 1st exon/1st intron                                                                                   | -0.332 | 3.11E-15 |
| ZFP42    | cg06274159                                                | EGFR and pan-negative                                                                                             | TSS200                                                                                                         | -0.267 | 5.00E-04 |
| ZNF132   | cg19776201                                                | EGFR and pan-negative                                                                                             | 5'UTR/1st exon/1st intron                                                                                      | -0.508 | 3.33E-16 |
| ZNF154   | cg21790626                                                | EGFR, KRAS and pan-negative                                                                                       | 5'UTR/1st exon/1st intron                                                                                      | -0.575 | 1.21E-06 |
| ZNF215   | cg02416716                                                | EGFR and pan-negative                                                                                             | 5'UTR/Gene body/1st intron                                                                                     | -0.387 | 1.11E-16 |
| ZNF258   | cg20176532                                                | EGFR and pan-negative                                                                                             | 5'UTR/1st exon/1st intron                                                                                      | -0.603 | 9.14E-07 |
| ZNF300   | cg19014419                                                | EGFR and pan-negative                                                                                             | 5'UTR/1st exon/1st intron                                                                                      | -0.48  | 0.00E+00 |
| ZNF329   | cg12792011                                                | EGFR and pan-negative                                                                                             | 5'UTR/Gene body/1st intron                                                                                     | -0.331 | 4.76E-03 |
| ZNF354C  | cg04488521; cg11538128                                    | EGFR and pan-negative; EGFR and pan-negative                                                                      | 5'UTR/Gene body/1st intron; TSS200                                                                             | -0.407 | 2.85E-09 |
| ZNF415   | cg10332700                                                | EGFR and pan-negative                                                                                             | 5'UTR/1st exon/1st intron                                                                                      | -0.63  | 2.88E-02 |
| ZNF454   | cg03355526; cg23037403                                    | EGFR, ALK, KRAS and pan-negative; EGFR, ALK, KRAS and pan-negative                                                | 5'UTR/Gene body/1st intron; TSS200                                                                             | -0.605 | 1.35E-03 |
| ZNF471   | cg14289985; cg24713204                                    | EGFR, ALK and pan-negative; EGFR, ALK and pan-negative                                                            | TSS1500; 5'UTR/Gene body/1st intron                                                                            | -0.567 | 0.00E+00 |
| ZNF502   | cg08210616                                                | EGFR and pan-negative                                                                                             | 5'UTR/1st exon/1st intron                                                                                      | -0.609 | 3.60E-05 |
| ZNF542   | cg26309134                                                | EGFR, KRAS and pan-negative                                                                                       | 1st exon/1st intron                                                                                            | -0.626 | 4.91E-04 |
| ZNF560   | cg04062391                                                | EGFR, KRAS and pan-negative                                                                                       | 5'UTR/Gene body/1st intron                                                                                     | -0.346 | 2.27E-09 |
| ZNF577   | cg16731240                                                | EGFR, KRAS and pan-negative                                                                                       | TSS200                                                                                                         | -0.222 | 1.80E-04 |
| ZNF597   | cg24333473                                                | EGFR and pan-negative                                                                                             | 5'UTR/1st exon/1st intron                                                                                      | -0.611 | 0.00E+00 |
| ZNF625   | cg17892556                                                | EGFR and pan-negative                                                                                             | 5'UTR/1st exon/1st intron                                                                                      | -0.395 | 8.16E-06 |
| ZNF671   | cg19246110                                                | EGFR and pan-negative                                                                                             | 5'UTR/1st exon/1st intron                                                                                      | -0.526 | 9.59E-13 |
| ZNF83    | cg04386405                                                | EGFR and pan-negative                                                                                             | 5'UTR/Gene body/1st intron                                                                                     | -0.207 | 5.19E-09 |

\*Probe IDs for the Infinium HumanMethylation27 BeadChip (Illumina). \*Each probe CpG site was annotated as (a) from 200 bp upstream of the transcription start site (TSS) to 1500 bp upstream of it (TSS1500), (b) from TSS to 200 bp upstream of TSS (TSS200), (c) the 5' untranslated region (UTR), (d) the 1st exon, (e) the 1st intron, (f) the gene body (2nd exon and downstream) based on the UCSC Genome Browser (<http://genome.ucsc.edu/>). \*Inverse correlation was examined using lung cancer data deposited in The Cancer Genome Atlas database (<https://www.cancer.gov/about-nci/organization/ccg/research/structural-genomics/tcga>) using the MethHC pipeline (<http://MethHC.mbc.nctu.edu.tw>).

Supplementary Table 8B. 67 genes showing significant differences in DNA methylation levels between non-cancerous and cancerous tissue samples, which are specific to some mutation groups and could potentially result in expression abnormalities.

| Gene symbol | Probe ID <sup>a</sup>  | Genetic Driver aberration groups specifically showing DNA methylation alterations | Annotation of CpG island <sup>b</sup>                  | Inverse correlation between DNA methylation levels and mRNA expression levels <sup>c</sup> |          |
|-------------|------------------------|-----------------------------------------------------------------------------------|--------------------------------------------------------|--------------------------------------------------------------------------------------------|----------|
|             |                        |                                                                                   |                                                        | Pearson correlation coefficient, r                                                         | P        |
| ALDH7A1     | cg08675664             | EGFR                                                                              | 1st exon/1st intron                                    | -0.228                                                                                     | 8.88E-16 |
| B4GALNT3    | cg11065385             | EGFR                                                                              | TSS1500                                                | -0.223                                                                                     | 0.00E+00 |
| BCR         | cg12406417             | EGFR                                                                              | 5'UTR/1st exon/1st intron                              | -0.28                                                                                      | 5.55E-16 |
| C9orf64     | cg02654291             | EGFR                                                                              | TSS1500                                                | -0.226                                                                                     | 1.31E-04 |
| CBS         | cg09622447             | EGFR                                                                              | 5'UTR/1st exon/1st intron                              | -0.334                                                                                     | 0.00E+00 |
| CELSR1      | cg06268694             | EGFR                                                                              | 1st exon/1st intron                                    | -0.443                                                                                     | 3.87E-03 |
| CENPB       | cg17565490             | EGFR                                                                              | 1st exon/1st intron                                    | -0.284                                                                                     | 5.28E-03 |
| CTBP2       | cg04233664             | EGFR                                                                              | 5'UTR/Gene body/1st intron                             | -0.392                                                                                     | 0.00E+00 |
| DEGS2       | cg08307816             | EGFR                                                                              | TSS200                                                 | -0.226                                                                                     | 6.11E-03 |
| DFNA5       | cg04770504             | EGFR                                                                              | 5'UTR/1st exon/1st intron                              | -0.252                                                                                     | 7.47E-09 |
| DGKZ        | cg18765542             | EGFR                                                                              | TSS1500                                                | -0.297                                                                                     | 4.44E-16 |
| FAAH        | cg12671744             | EGFR                                                                              | TSS200                                                 | -0.28                                                                                      | 3.97E-04 |
| FBXO27      | cg02197293             | EGFR                                                                              | 5'UTR/1st exon/1st intron                              | -0.204                                                                                     | 4.13E-06 |
| FSTL1       | cg201114394            | EGFR                                                                              | TSS1500                                                | -0.413                                                                                     | 2.11E-02 |
| GLRB        | cg09688546             | EGFR                                                                              | 5'UTR/1st exon/1st intron                              | -0.276                                                                                     | 5.55E-16 |
| GNAI1       | cg27268486             | EGFR                                                                              | 5'UTR/1st exon/1st intron                              | -0.204                                                                                     | 7.60E-09 |
| GNAZ        | cg19764436             | EGFR                                                                              | 5'UTR/Gene body/1st intron                             | -0.279                                                                                     | 8.88E-16 |
| IGFBP3      | cg06713098             | EGFR                                                                              | 1st exon/1st intron                                    | -0.215                                                                                     | 3.33E-16 |
| IRAK3       | cg20395892             | EGFR                                                                              | TSS200                                                 | -0.314                                                                                     | 5.55E-16 |
| KCNK1       | cg11815363             | EGFR                                                                              | 1st exon/1st intron                                    | -0.31                                                                                      | 3.33E-16 |
| KLFL4       | cg03939688; cg07309102 | EGFR                                                                              | 5'UTR/1st exon/1st intron; 5'UTR/1st exon/1st intron   | -0.241                                                                                     | 0.00E+00 |
| KLK8        | cg25134071             | EGFR                                                                              | TSS1500                                                | -0.234                                                                                     | 3.68E-06 |
| L3MBTL4     | cg14155416             | EGFR                                                                              | 5'UTR/Gene body/1st intron                             | -0.253                                                                                     | 9.99E-16 |
| MESP1       | cg01294695             | EGFR                                                                              | TSS200                                                 | -0.271                                                                                     | 3.33E-16 |
| PEBP1       | cg14349467             | EGFR                                                                              | 1st exon/1st intron                                    | -0.208                                                                                     | 0.00E+00 |
| PF4V1       | cg20615832             | EGFR                                                                              | 1st exon/1st intron                                    | -0.228                                                                                     | 4.99E-02 |
| PLEK2       | cg20141916             | EGFR                                                                              | TSS200                                                 | -0.213                                                                                     | 0.00E+00 |
| PRKCDDBP    | cg05628549             | EGFR                                                                              | TSS200                                                 | -0.252                                                                                     | 0.00E+00 |
| PTPRM       | cg07075930             | EGFR                                                                              | 5'UTR/1st exon/1st intron                              | -0.25                                                                                      | 0.00E+00 |
| RGS17       | cg24317255             | EGFR                                                                              | 5'UTR/Gene body/1st intron                             | -0.238                                                                                     | 0.00E+00 |
| SIX1        | cg12839593             | EGFR                                                                              | TSS200                                                 | -0.327                                                                                     | 1.11E-16 |
| SNRPN       | cg02125271; cg02171545 | EGFR                                                                              | 5'UTR/Gene body/1st intron; 5'UTR/Gene body/1st intron | -0.468                                                                                     | 2.73E-14 |
| SOX30       | cg06200339             | EGFR                                                                              | 5'UTR/1st exon/1st intron                              | -0.619                                                                                     | 5.98E-11 |
| SPG20       | cg22609576             | EGFR                                                                              | TSS200                                                 | -0.355                                                                                     | 0.00E+00 |
| THAP10      | cg05764376             | EGFR                                                                              | 1st exon/1st intron                                    | -0.231                                                                                     | 1.11E-16 |
| TNFRSF10C   | cg16175263             | EGFR                                                                              | 5'UTR/1st exon/1st intron                              | -0.219                                                                                     | 1.53E-11 |
| TPD52       | cg18459342             | EGFR                                                                              | TSS1500                                                | -0.347                                                                                     | 3.11E-15 |
| TRIM17      | cg23540518             | EGFR                                                                              | 5'UTR/1st exon/1st intron                              | -0.246                                                                                     | 1.50E-14 |
| VLDLR       | cg05523047             | EGFR                                                                              | TSS1500                                                | -0.251                                                                                     | 0.00E+00 |
| ZNF214      | cg22867063             | EGFR                                                                              | 5'UTR/1st exon/1st intron                              | -0.418                                                                                     | 2.03E-09 |
| ZNF496      | cg01184522             | EGFR                                                                              | TSS1500                                                | -0.205                                                                                     | 8.67E-08 |
| AGPAT2      | cg15720535             | Pan-negative                                                                      | TSS1500                                                | -0.201                                                                                     | 2.05E-05 |
| ALKBH3      | cg17838765             | Pan-negative                                                                      | TSS200                                                 | -0.459                                                                                     | 3.57E-04 |
| ASZ1        | cg16540704             | Pan-negative                                                                      | 1st exon/1st intron                                    | -0.32                                                                                      | 4.61E-03 |
| BRF1        | cg09450238             | Pan-negative                                                                      | TSS200                                                 | -0.33                                                                                      | 0.00E+00 |
| CACNA1D     | cg01942127             | Pan-negative                                                                      | 1st exon/1st intron                                    | -0.323                                                                                     | 1.10E-05 |
| CCNJ        | cg04590978             | Pan-negative                                                                      | TSS1500                                                | -0.246                                                                                     | 0.00E+00 |
| CHST2       | cg00995327             | Pan-negative                                                                      | 5'UTR/1st exon/1st intron                              | -0.255                                                                                     | 3.83E-08 |
| GPX7        | cg16557944             | Pan-negative                                                                      | 1st exon/1st intron                                    | -0.402                                                                                     | 0.00E+00 |
| HIST1H2AA   | cg01307730             | Pan-negative                                                                      | 1st exon/1st intron                                    | -0.213                                                                                     | 9.08E-06 |
| HMGAI       | cg03020951             | Pan-negative                                                                      | TSS1500                                                | -0.257                                                                                     | 0.00E+00 |
| HOBX9       | cg13643585             | Pan-negative                                                                      | TSS200                                                 | -0.21                                                                                      | 4.26E-07 |
| KCNMA1      | cg04688368             | Pan-negative                                                                      | 1st exon/1st intron                                    | -0.216                                                                                     | 5.41E-09 |
| KCTD15      | cg00704310             | Pan-negative                                                                      | 5'UTR/Gene body/1st intron                             | -0.28                                                                                      | 8.88E-16 |
| NDN         | cg18602919; cg12532169 | Pan-negative                                                                      | 1st exon/1st intron; 5'UTR/1st exon/1st intron         | -0.397                                                                                     | 0.00E+00 |
| SLC15A3     | cg13828758             | Pan-negative                                                                      | 5'UTR/1st exon/1st intron                              | -0.397                                                                                     | 0.00E+00 |
| SLC16A3     | cg21992250             | Pan-negative                                                                      | 1st exon/1st intron                                    | -0.261                                                                                     | 0.00E+00 |
| SSR2        | cg14417329             | Pan-negative                                                                      | TSS200                                                 | -0.389                                                                                     | 3.33E-16 |
| TCP11       | cg06251129             | Pan-negative                                                                      | 5'UTR/Gene body/1st intron                             | -0.228                                                                                     | 0.00E+00 |
| TIAM1       | cg01108476             | Pan-negative                                                                      | TSS200                                                 | -0.612                                                                                     | 1.58E-05 |
| TRIM29      | cg04807655             | Pan-negative                                                                      | 5'UTR/Gene body/1st intron                             | -0.225                                                                                     | 9.99E-16 |
| TTC22       | cg13625403             | Pan-negative                                                                      | 1st exon/1st intron                                    | -0.417                                                                                     | 1.68E-06 |
| VAX2        | cg24697184             | Pan-negative                                                                      | 1st exon/1st intron                                    | -0.314                                                                                     | 5.55E-16 |
| WDR17       | cg12374431             | Pan-negative                                                                      | TSS1500                                                | -0.341                                                                                     | 1.22E-15 |
| ZNF132      | cg11674404; cg18443378 | Pan-negative                                                                      | 5'UTR/Gene body/1st intron; TSS200                     | -0.262                                                                                     | 5.55E-16 |
| ZNF287      | cg13877915             | Pan-negative                                                                      | TSS200                                                 | -0.508                                                                                     | 3.33E-16 |
| ZNF287      | cg23423382             | Pan-negative                                                                      | 5'UTR/1st exon/1st intron                              | -0.457                                                                                     | 5.67E-06 |
| ZNF703      | cg04553559             | Pan-negative                                                                      | TSS1500                                                | -0.298                                                                                     | 4.72E-05 |

<sup>a</sup>Probe IDs for the Infinium HumanMethylation27 BeadChip (Illumina). <sup>b</sup>Each probe CpG site was annotated as (a) from 200 bp upstream of the transcription start site (TSS) to 1500 bp upstream of it (TSS1500), (b) from TSS to 200 bp upstream of TSS (TSS200), (c) the 5' untranslated region (UTR), (d) the 1st exon, (e) the 1st intron, (f) the gene body (2nd exon and downstream) based on the UCSC Genome Browser (<http://genome.ucsc.edu/>). <sup>c</sup>Inverse correlation was examined using lung cancer data deposited in The Cancer Genome Atlas database (<https://www.cancer.gov/about-nci/organization/ccg/research/structural-genomics/tcga>) using the MethHC pipeline (<http://MethHC.mbc.nctu.edu.tw>).



Supplementary Table 10. Multivariate analyses using the differences in the DNA methylation levels of EGFR-specific genes and pan-negative group-specific genes for samples of adjacent normal lung tissue (N) and tumorous tissue (T) relative to clinicopathological parameters of lung adenocarcinomas.

(A) Genes showing differences in DNA methylation levels between N and T samples ( $\Delta M_{T-N}$ ) that were specific to the EGFR mutation-positive group.

| Variable                                     | Tumor size <sup>a</sup> |                |                       |
|----------------------------------------------|-------------------------|----------------|-----------------------|
|                                              | Odds Ratio              | 95% CI         | <i>P</i> <sup>b</sup> |
| Age                                          | 0.970                   | 0.936 to 1.005 | 0.092                 |
| Sex                                          | 0.528                   | 0.226 to 1.234 | 0.14                  |
| Smoking                                      | 0.790                   | 0.493 to 1.264 | 0.325                 |
| $\Delta M_{T-N}$ of <i>KLF4</i> (cg03939688) | 0.650                   | 0.439 to 0.963 | <u>0.032</u>          |

| Variable                                        | Lymphatic invasion <sup>c</sup> |                |                       |
|-------------------------------------------------|---------------------------------|----------------|-----------------------|
|                                                 | Odds Ratio                      | 95% CI         | <i>P</i> <sup>b</sup> |
| Age                                             | 0.961                           | 0.913 to 1.011 | 0.121                 |
| Sex                                             | 0.844                           | 0.3 to 2.375   | 0.748                 |
| Smoking                                         | 0.853                           | 0.486 to 1.496 | 0.578                 |
| $\Delta M_{T-N}$ of <i>CTBP2</i> (cg04233664)   | 0.746                           | 0.479 to 1.16  | 0.193                 |
| $\Delta M_{T-N}$ of <i>GLRB</i> (cg09688546)    | 1.053                           | 0.609 to 1.82  | 0.854                 |
| $\Delta M_{T-N}$ of <i>IGFBP3</i> (cg06713098)  | 0.894                           | 0.559 to 1.429 | 0.64                  |
| $\Delta M_{T-N}$ of <i>L3MBTL4</i> (cg14155416) | 0.759                           | 0.453 to 1.271 | 0.294                 |
| $\Delta M_{T-N}$ of <i>PTPRM</i> (cg07075930)   | 1.056                           | 0.5 to 2.228   | 0.887                 |
| $\Delta M_{T-N}$ of <i>RGS17</i> (cg24317255)   | 0.897                           | 0.47 to 1.713  | 0.742                 |
| $\Delta M_{T-N}$ of <i>SNRPN</i> (cg02125271)   | 0.431                           | 0.188 to 0.986 | <u>0.046</u>          |

| Variable                                        | Intrapulmonary metastasis <sup>a</sup> |                |                       |
|-------------------------------------------------|----------------------------------------|----------------|-----------------------|
|                                                 | Odds Ratio                             | 95% CI         | <i>P</i> <sup>b</sup> |
| Age                                             | 0.9284                                 | 0.872 to 0.989 | <u>0.021</u>          |
| Sex                                             | 0.3847                                 | 0.076 to 1.951 | 0.249                 |
| Smoking                                         | 0.8657                                 | 0.364 to 2.061 | 0.745                 |
| $\Delta M_{T-N}$ of <i>L3MBTL4</i> (cg14155416) | 0.3680                                 | 0.189 to 0.717 | <u>0.003</u>          |
| $\Delta M_{T-N}$ of <i>SPG20</i> (cg22609576)   | 2.5758                                 | 1.191 to 5.57  | <u>0.016</u>          |
| $\Delta M_{T-N}$ of <i>ZNF496</i> (cg01184522)  | 1.9966                                 | 1.267 to 3.147 | <u>0.003</u>          |

Genes showing a false discovery rate (FDR) of more than 0.25 in Supplementary Table 9A were subjected to multivariate analysis. <sup>a</sup>Ordered logistic regression. <sup>b</sup>*P*-values of <0.05 are underlined. <sup>c</sup>Logistic regression.

(B) Genes showing differences in DNA methylation levels between N and T samples ( $\Delta M_{T-N}$ ) that were specific to the pan-negative group.

| Variable                                       | Tumor size <sup>a</sup> |                |                       |
|------------------------------------------------|-------------------------|----------------|-----------------------|
|                                                | Odds Ratio              | 95% CI         | <i>P</i> <sup>b</sup> |
| Age                                            | 0.970                   | 0.936 to 1.005 | 0.092                 |
| Sex                                            | 0.528                   | 0.226 to 1.234 | 0.14                  |
| Smoking                                        | 0.790                   | 0.493 to 1.264 | 0.325                 |
| $\Delta M_{T-N}$ of <i>CHST2</i> (cg00995327)  | 1.602                   | 1.084 to 2.368 | <u>0.018</u>          |
| $\Delta M_{T-N}$ of <i>TRIM29</i> (cg13625403) | 0.738                   | 0.58 to 0.938  | <u>0.013</u>          |

| Variable                                      | Pleural invasion <sup>a</sup> |                |                       |
|-----------------------------------------------|-------------------------------|----------------|-----------------------|
|                                               | Odds Ratio                    | 95% CI         | <i>P</i> <sup>b</sup> |
| Age                                           | 0.974                         | 0.941 to 1.008 | 0.127                 |
| Sex                                           | 0.658                         | 0.297 to 1.46  | 0.303                 |
| Smoking                                       | 1.084                         | 0.706 to 1.665 | 0.713                 |
| $\Delta M_{T-N}$ of <i>SSR2</i> (cg06251129)  | 0.492                         | 0.296 to 0.817 | <u>0.006</u>          |
| $\Delta M_{T-N}$ of <i>WDR17</i> (cg18443378) | 1.259                         | 1.038 to 1.527 | <u>0.019</u>          |

  

| Variable                                     | Lymphatic invasion <sup>c</sup> |                |                       |
|----------------------------------------------|---------------------------------|----------------|-----------------------|
|                                              | Odds Ratio                      | 95% CI         | <i>P</i> <sup>b</sup> |
| Age                                          | 0.961                           | 0.913 to 1.011 | 0.121                 |
| Sex                                          | 0.844                           | 0.3 to 2.375   | 0.748                 |
| Smoking                                      | 0.853                           | 0.486 to 1.496 | 0.578                 |
| $\Delta M_{T-N}$ of <i>SSR2</i> (cg06251129) | 0.436                           | 0.23 to 0.825  | <u>0.011</u>          |

  

| Variable                                        | Intrapulmonary metastasis <sup>a</sup> |                |                       |
|-------------------------------------------------|----------------------------------------|----------------|-----------------------|
|                                                 | Odds Ratio                             | 95% CI         | <i>P</i> <sup>b</sup> |
| Age                                             | 0.9284                                 | 0.872 to 0.989 | <u>0.021</u>          |
| Sex                                             | 0.3847                                 | 0.076 to 1.951 | 0.249                 |
| Smoking                                         | 0.8657                                 | 0.364 to 2.061 | 0.745                 |
| $\Delta M_{T-N}$ of <i>SLC16A3</i> (cg14417329) | 1.8086                                 | 0.955 to 3.426 | 0.069                 |

Genes showing a FDR of more than 0.25 in Supplementary Table 9B were subjected to multivariate analysis. <sup>a</sup>Ordered logistic regression. <sup>b</sup>*P*-values of <0.05 are underlined. <sup>c</sup>Logistic regression.

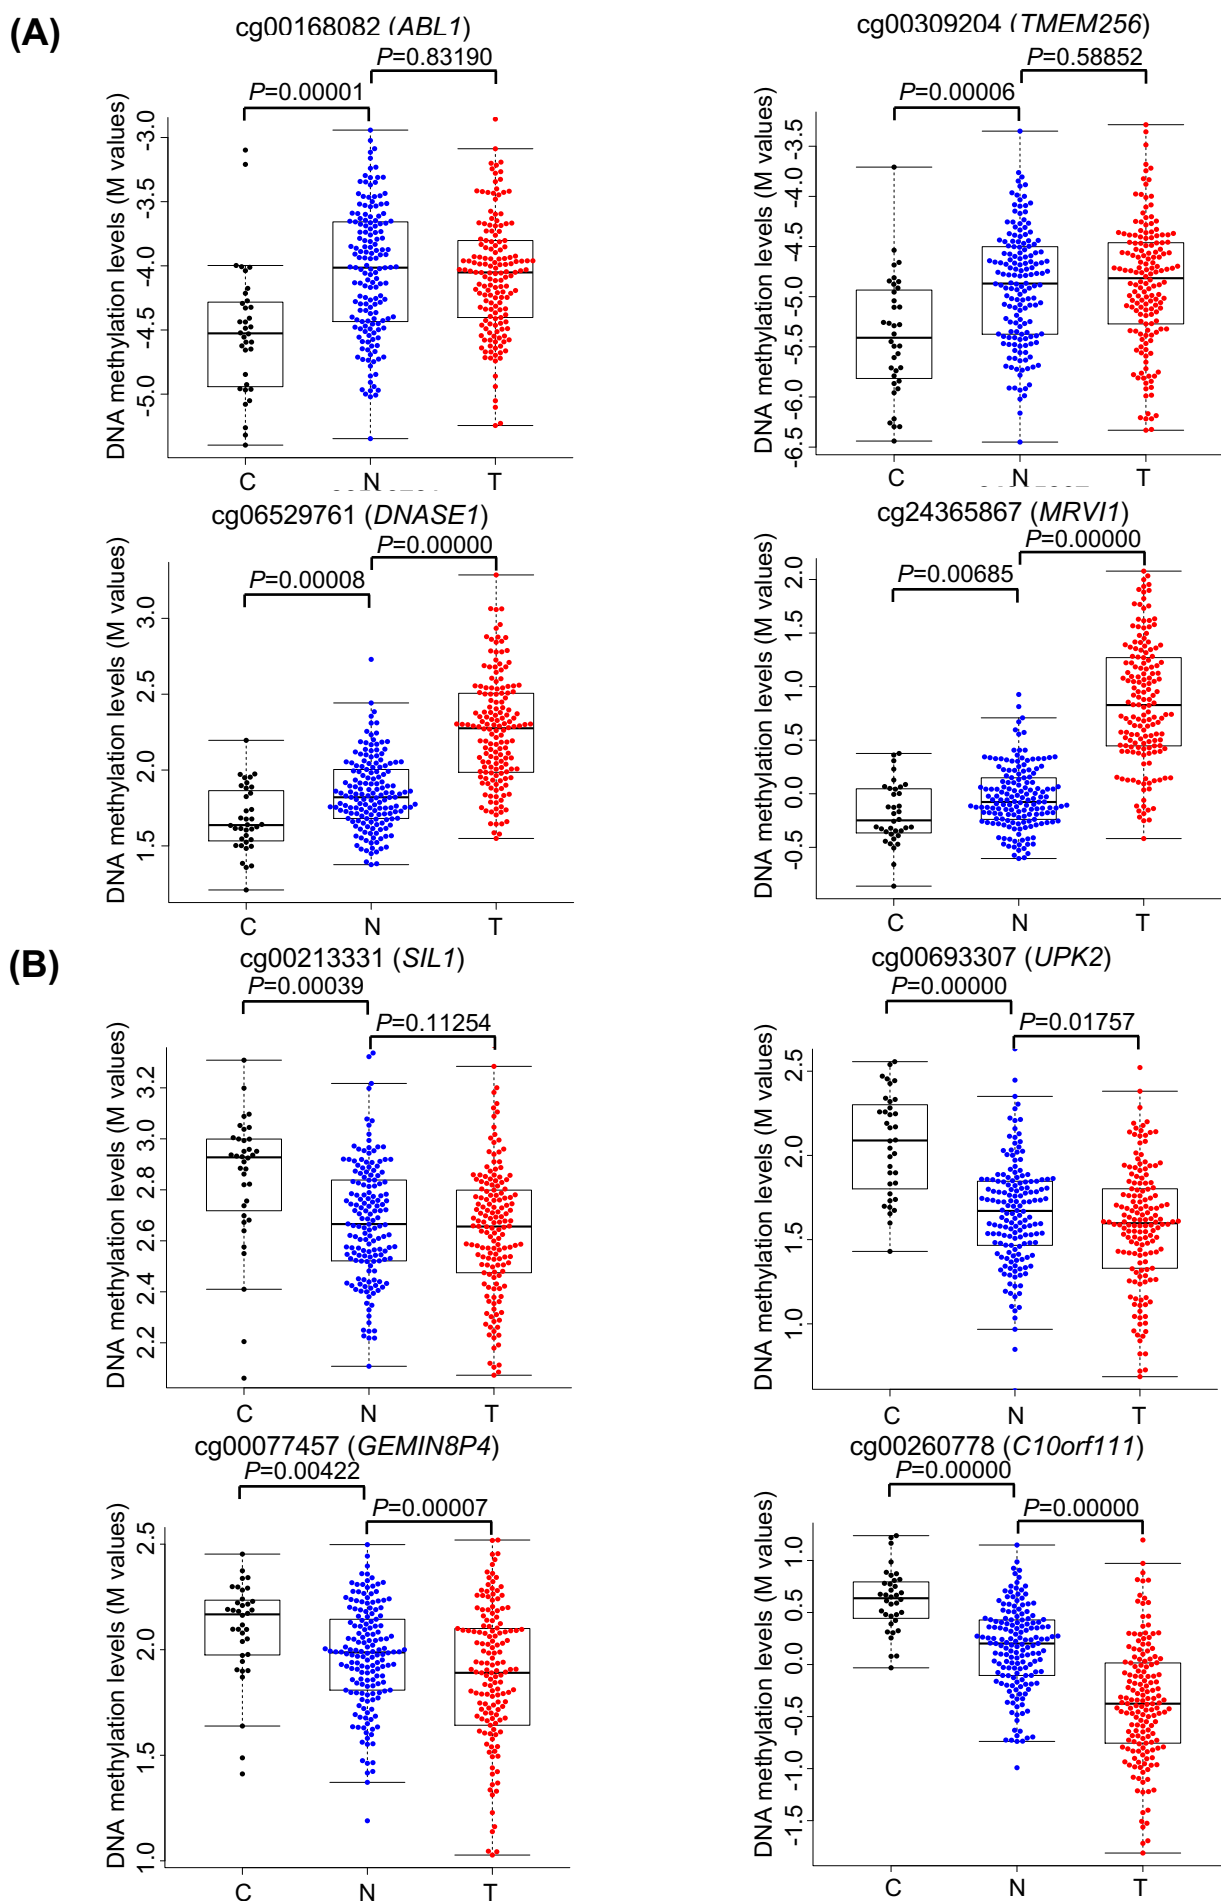

Supplementary Figure 1. Representative genes showing ordered differences in DNA methylation levels from normal control lung tissue (C) obtained from patients without lung cancers ( $n=32$ ), relative to adjacent lung tissue (N) obtained from patients with lung adenocarcinomas ( $n=162$ ), and then to the corresponding tumorous tissue (T) ( $n=162$ ) ( $P<0.05$  by Jonckheere-Terpstra trend test). **(A)** Genes for which DNA hypermethylation in N samples relative to C samples had been inherited by or strengthened in T samples. **(B)** Gene for which DNA hypomethylation in N samples relative to C samples had been inherited by or strengthened in T samples. Infinium probe IDs and gene symbols are shown at the top of each panel.

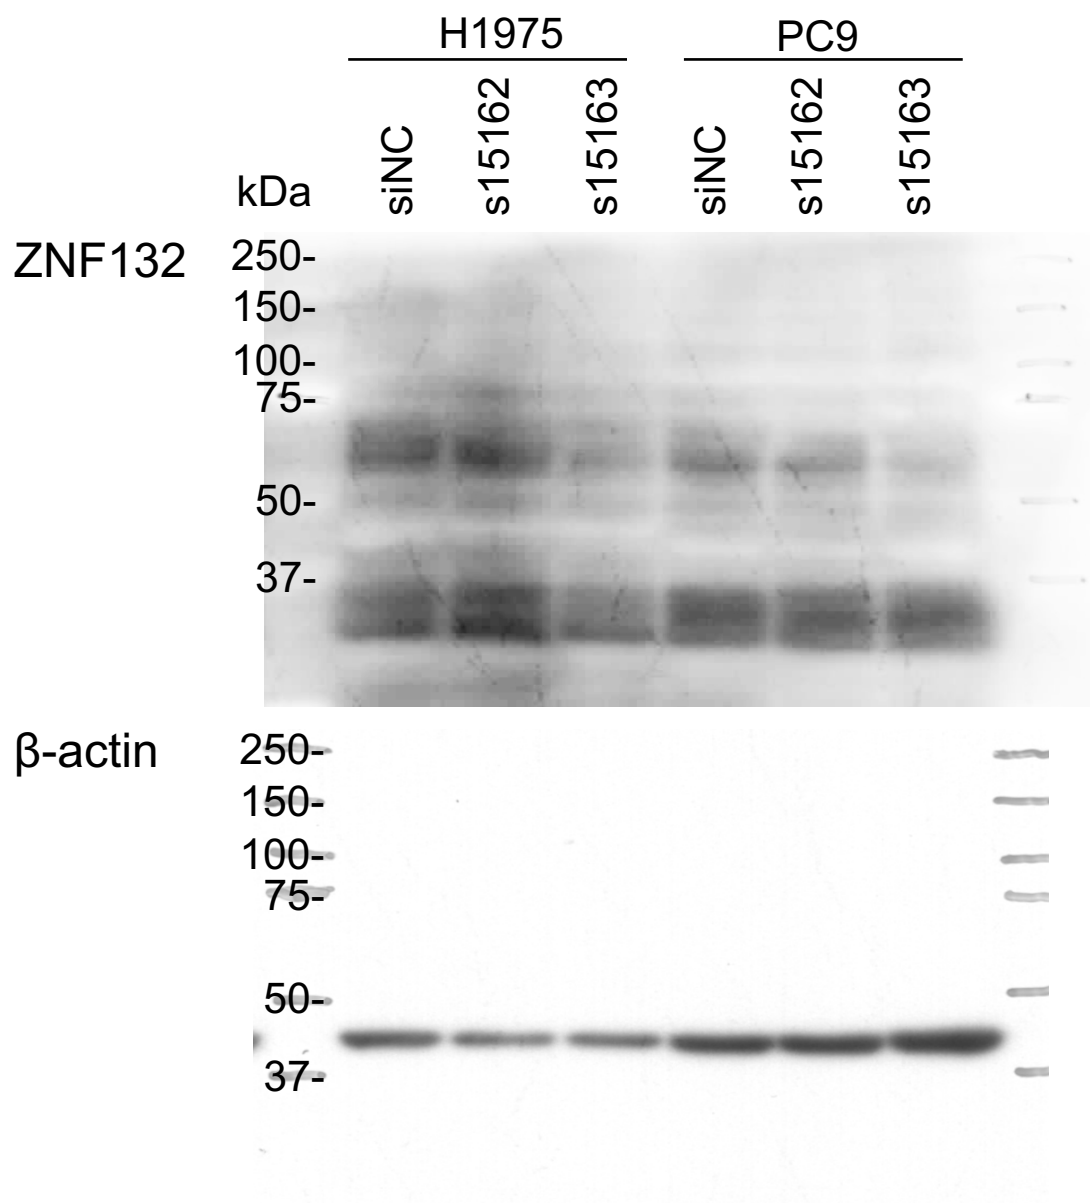

Supplementary Figure 2 Full-length Western blotting gel for ZNF132 and  $\beta$ -actin. Anti-human ZNF132 rabbit polyclonal antibody (PA5-41096, 1:500 dilution, Invirtogen, Carlsbad, CA) or anti-human  $\beta$ -actin rabbit monoclonal antibody (13E5, 1:1000 dilution, Cell Signaling Technology, Danvers, MA) were used.

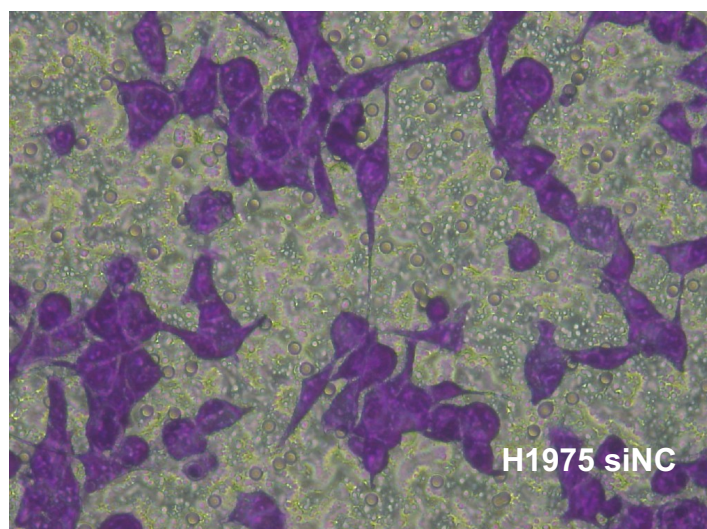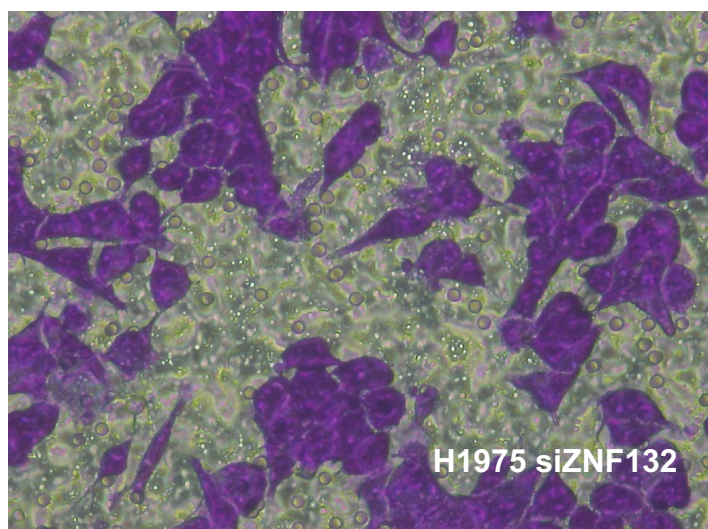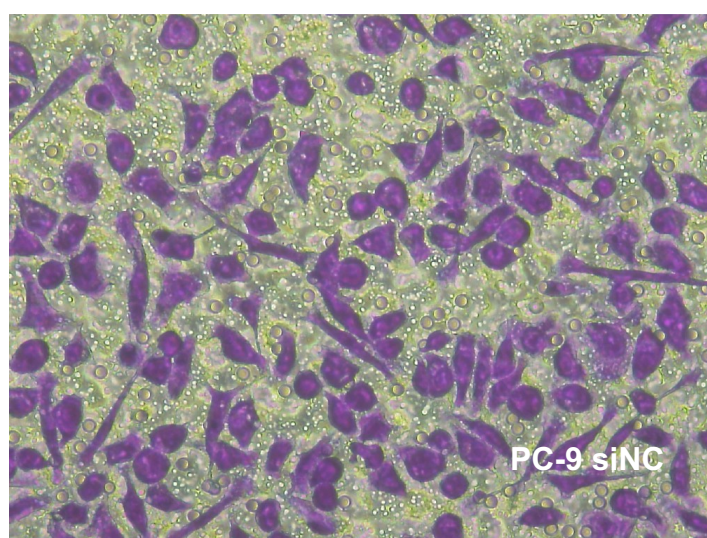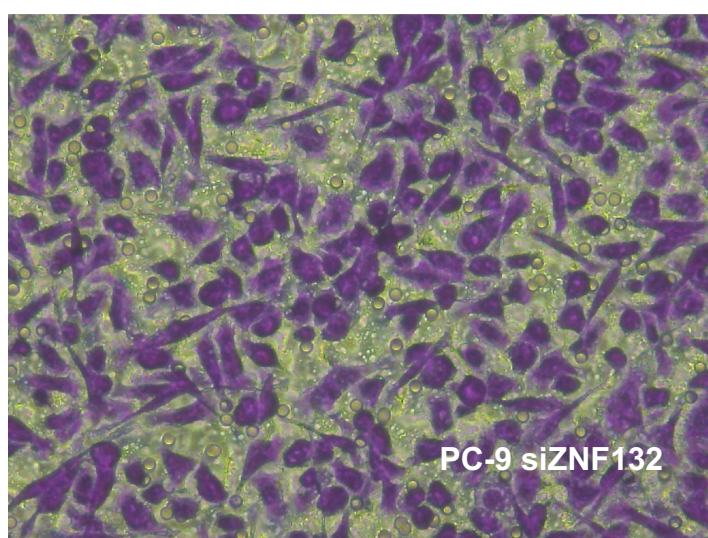

Supplementary Figure 3. Cell migration assay using the lung adenocarcinoma cell lines H1975 and PC-9 transfected with a small interfering RNA for the *ZNF132* gene (s15163) and a negative control (siNC). Cells that had passed through the polycarbonate membrane were fixed with 10% formalin and stained with 0.5% crystal violet.
